# Supplementary material for: Multi-Omics Profiling of Hypertrophic Cardiomyopathy Reveals Altered Mechanisms in Mitochondrial Dynamics and Excitation–Contraction Coupling
Source: MDPI journal article supplement (doi:10.3390/ijms24054724), 2023-03-01
Supplement: s1 [file s1]

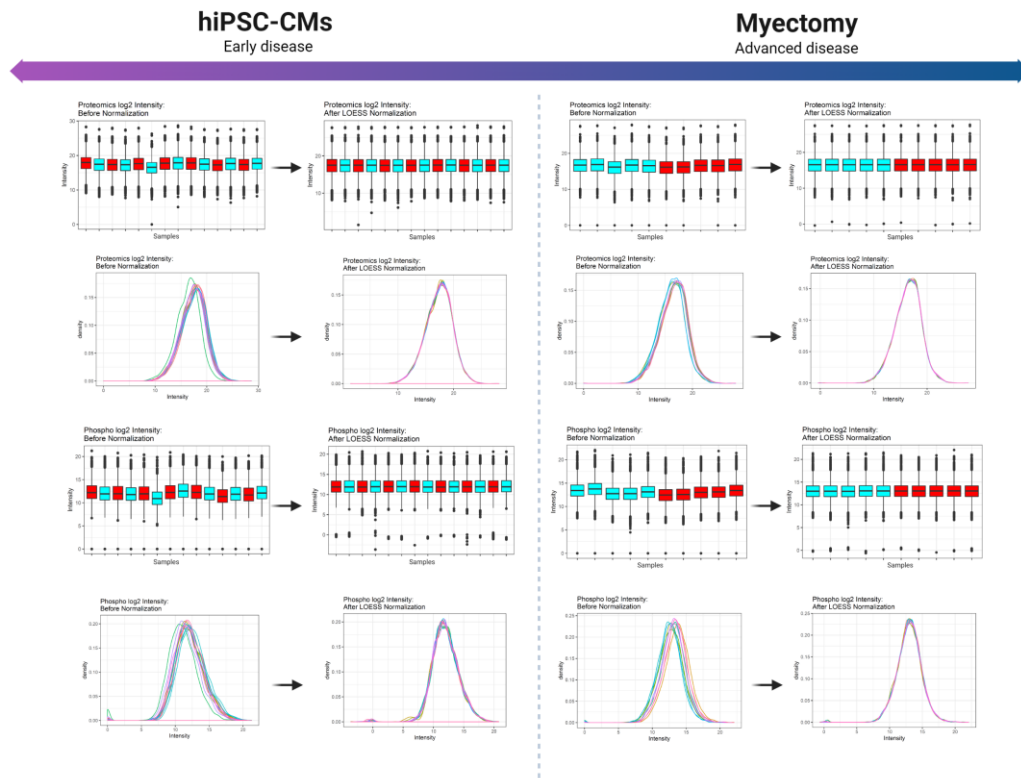

**Figure S1.** Intensity plots of proteome and phosphoproteome for hiPSC-CM and myectomy specimens.

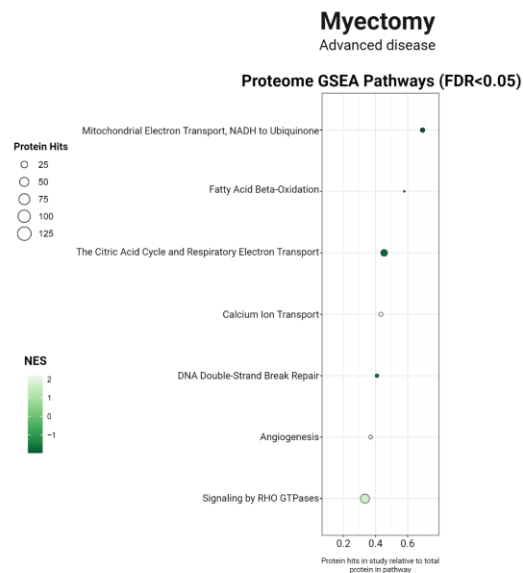

**Figure S2.** Top differential pathways from gene set enrichment analysis of mutant versus control myectomy proteome.
