# Supplementary material for: Multi-Omics Profiling of Hypertrophic Cardiomyopathy Reveals Altered Mechanisms in Mitochondrial Dynamics and Excitation–Contraction Coupling
Source: MDPI journal article supplement (doi:10.3390/ijms24054724), 2023-03-01
Supplement: s1 [file s1]

**Supplementary Table S1:** hiPSC-CM expression values. (A) Proteomics and (B) Phosphoproteomics data. The exact phosphosite is provided in (B) amino acid column. Blue samples are R403Q mutants and red are WT.

**Supplementary Table S2:** hiPSC-CM gene set enrichment analysis (GSEA) pathways. A positive NES denotes enrichment in HCM.

**Supplementary Table S3:** Patient myectomy expression values. (A) Proteomics and (B) Phosphoproteomics data. The exact phosphosite is provided in (B) amino acid column. Red samples are MYH7 mutants and Blue are WT.

**Supplementary Table S4:** Patient myectomy gene set enrichment analysis (GSEA) pathways. A positive NES denotes enrichment in HCM.

**Supplementary Table S5:** hiPSC-CM metabolic enrichment network analysis (MOMENTA) pathways. A positive NES denotes enrichment in HCM.

**Supplementary Table S6:** hiPSC-CM global metabolomics.

**Supplementary Table S7:** hiPSC-CM  $^{13}\text{C}$  labeled glucose measurements.

**Supplementary Table S8:** hiPSC-CM  $^{13}\text{C}$  labeled glutamine measurements.

**Supplementary Table S9:** Patient myectomy metabolic enrichment network analysis (MOMENTA) pathways. A positive NES denotes enrichment in HCM.

**Supplementary Table S10:** hiPSC-CM and patient myectomy excitation contraction coupling phosphoprotein expression values for figure 5.

**Supplementary Figure S1:** Intensity plots of proteome and phosphoproteome for hiPSC-CM and myectomy specimens.

**Supplementary Figure S2:** Top differential pathways from gene set enrichment analysis of mutant versus control myectomy proteome.
