# Supplementary material for: Multi-Omics Profiling of Hypertrophic Cardiomyopathy Reveals Altered Mechanisms in Mitochondrial Dynamics and Excitation–Contraction Coupling
Source: Int J Mol Sci. 2023 Mar 1;24(5):4724. doi: 10.3390/ijms24054724 (PMC10002553; doi:10.3390/ijms24054724)
Supplement: Supplementary file 1 [file ijms-24-04724-s001.zip]

Archive with 12 entries (12 files):
- ijms-2205022-Figures S1 and S2.pdf
- ijms-2205022-supplementary captions.pdf
- Supp_Table_S1.xlsx
- Supp_Table_S10.xlsx
- Supp_Table_S2.xlsx
- Supp_Table_S3.xlsx
- Supp_Table_S4.xlsx
- Supp_Table_S5.xlsx
- Supp_Table_S6.xlsx
- Supp_Table_S7.xlsx
- Supp_Table_S8.xlsx
- Supp_Table_S9.xlsx
