# Supplementary material for: Multi-Omics Profiling of Hypertrophic Cardiomyopathy Reveals Altered Mechanisms in Mitochondrial Dynamics and Excitation–Contraction Coupling
Source: Int J Mol Sci. 2023 Mar 1;24(5):4724. doi: 10.3390/ijms24054724 (PMC10002553; doi:10.3390/ijms24054724)
Supplement: Supplementary file 1 [file ijms-24-04724-s001.zip › Supp_Table_S1.xlsx]

## Sheet: (A)Proteomics
	Normalized Log2 Intensity, Row Z Score																		fX403													Normalized Log2 Intensity
FEATURE	WT_319	WT_320	WT_325	WT_327	WT_331	WT_404	WT_414	R403Q_319	R403Q_320	R403Q_325	R403Q_327	R403Q_331	R403Q_404	R403Q_414	GENE	PROTEIN	UNIPROT	MAXFC	P.VALUE	ADJ.P.VAL	LOGFC	FASTA_HEADERS	UNIPROT_FUNCTION	UNIPROT_CELLULAR_LOCATION	UNIPROT_DISEASE	GO_BIOLOGICAL_PROCESS	GO_MOLECULAR_FUNCTION	GO_CELLULAR_COMPONENT	GO_ID	REACTOMEID	KEGG_ID	WT_319.1	WT_320.1	WT_325.1	WT_327.1	WT_331.1	WT_404.1	WT_414.1	R403Q_319.1	R403Q_320.1	R403Q_325.1	R403Q_327.1	R403Q_331.1	R403Q_404.1	R403Q_414.1
TXNRD2_Q9NNW7	0.855704	0.850456	0.815929	0.906142	0.895858	1.27612	1.08714	-0.882219	-0.9218	-0.85203	-1.00282	-0.925438	-1.14449	-0.958556	TXNRD2	Thioredoxin reductase 2, mitochondrial	Q9NNW7	1.18584	2.13455e-09	1.67114e-05	-2.66606	sp|Q9NNW7|TRXR2_HUMAN Thioredoxin reductase 2, mitochondrial OS=Homo sapiens OX=9606 GN=TXNRD2 PE=1 SV=3	FUNCTION: Involved in the control of reactive oxygen species levels and the regulation of mitochondrial redox homeostasis (PubMed:24601690). Maintains thioredoxin in a reduced state. May play a role in redox-regulated cell signaling. {ECO:0000269|PubMed:24601690}.	SUBCELLULAR LOCATION: Mitochondrion {ECO:0000269|PubMed:10215850}.	DISEASE: Glucocorticoid deficiency 5 (GCCD5) [MIM:617825]: A form of glucocorticoid deficiency, a rare autosomal recessive disorder characterized by resistance to ACTH action on the adrenal cortex, adrenal insufficiency and an inability of the adrenal cortex to produce cortisol. It usually presents in the neonatal period or in early childhood with episodes of hypoglycemia and other symptoms relat…	cell redox homeostasis [GO:0045454]; cellular response to oxidative stress [GO:0034599]; response to oxygen radical [GO:0000305]	flavin adenine dinucleotide binding [GO:0050660]; thioredoxin-disulfide reductase activity [GO:0004791]	cytoplasm [GO:0005737]; cytosol [GO:0005829]; intracellular membrane-bounded organelle [GO:0043231]; mitochondrial matrix [GO:0005759]; mitochondrion [GO:0005739]	GO:0000305; GO:0004791; GO:0005737; GO:0005739; GO:0005759; GO:0005829; GO:0034599; GO:0043231; GO:0045454; GO:0050660	R-HSA-3299685;	hsa:10587;	16.8729	16.8656	16.8174	16.9433	16.9289	17.4595	17.1958	14.4479	14.3927	14.49	14.2796	14.3876	14.0819	14.3414
MOXD1_Q6UVY6	0.337871	1.02941	0.543662	1.39005	1.24626	0.886756	1.02188	-0.929237	-0.784022	-1.26714	-0.588696	-1.02752	-0.931429	-0.927849	MOXD1	DBH-like monooxygenase protein 1	Q6UVY6	1.11301	1.84148e-08	7.20848e-05	-1.81013	sp|Q6UVY6|MOXD1_HUMAN DBH-like monooxygenase protein 1 OS=Homo sapiens OX=9606 GN=MOXD1 PE=1 SV=1		SUBCELLULAR LOCATION: Endoplasmic reticulum membrane {ECO:0000250}; Single-pass type I membrane protein {ECO:0000250}.		dopamine catabolic process [GO:0042420]; norepinephrine biosynthetic process [GO:0042421]; octopamine biosynthetic process [GO:0006589]	copper ion binding [GO:0005507]; dopamine beta-monooxygenase activity [GO:0004500]	endoplasmic reticulum membrane [GO:0005789]; extracellular space [GO:0005615]; integral component of membrane [GO:0016021]; secretory granule membrane [GO:0030667]	GO:0004500; GO:0005507; GO:0005615; GO:0005789; GO:0006589; GO:0016021; GO:0030667; GO:0042420; GO:0042421		hsa:26002;	17.2548	17.9334	17.4567	18.2873	18.1462	17.7934	17.926	16.0113	16.1538	15.6797	16.3455	15.9149	16.0092	16.0127
RPS4Y1_P22090	-1.08639	-1.51089	-0.57412	-1.05477	-1.13023	-0.380799	-0.640381	0.796162	0.848642	1.21906	0.427101	0.902572	0.950419	1.23361	RPS4Y1	40S ribosomal protein S4, Y isoform 1	P22090	1.04958	4.68739e-07	0.00122325	0.831757	sp|P22090|RS4Y1_HUMAN 40S ribosomal protein S4, Y isoform 1 OS=Homo sapiens OX=9606 GN=RPS4Y1 PE=1 SV=2				multicellular organism development [GO:0007275]; nuclear-transcribed mRNA catabolic process, nonsense-mediated decay [GO:0000184]; SRP-dependent cotranslational protein targeting to membrane [GO:0006614]; translation [GO:0006412]; translational initiation [GO:0006413]; viral transcription [GO:0019083]	RNA binding [GO:0003723]; rRNA binding [GO:0019843]; structural constituent of ribosome [GO:0003735]	cytosol [GO:0005829]; cytosolic small ribosomal subunit [GO:0022627]; membrane [GO:0016020]; nucleoplasm [GO:0005654]; nucleus [GO:0005634]; polysome [GO:0005844]	GO:0000184; GO:0003723; GO:0003735; GO:0005634; GO:0005654; GO:0005829; GO:0005844; GO:0006412; GO:0006413; GO:0006614; GO:0007275; GO:0016020; GO:0019083; GO:0019843; GO:0022627	R-HSA-156827;R-HSA-156902;R-HSA-1799339;R-HSA-192823;R-HSA-2408557;R-HSA-6791226;R-HSA-72649;R-HSA-72689;R-HSA-72695;R-HSA-72702;R-HSA-72706;R-HSA-72764;R-HSA-9010553;R-HSA-9633012;R-HSA-975956;R-HSA-975957;	hsa:6192;	16.6969	16.5031	16.9307	16.7113	16.6769	17.0189	16.9005	17.5562	17.5801	17.7492	17.3877	17.6048	17.6266	17.7559
MYH6_P13533	0.16733	0.362037	0.878091	1.14248	1.32327	0.969181	1.33111	-1.23604	-1.22645	-0.8408	-0.972831	-0.98022	-0.115285	-0.801859	MYH6	Myosin-6	P13533	1.05795	6.60026e-07	0.00129184	-1.32639	sp|P13533|MYH6_HUMAN Myosin-6 OS=Homo sapiens OX=9606 GN=MYH6 PE=1 SV=5	FUNCTION: Muscle contraction.	SUBCELLULAR LOCATION: Cytoplasm, myofibril. Note=Thick filaments of the myofibrils.	DISEASE: Atrial septal defect 3 (ASD3) [MIM:614089]: A congenital heart malformation characterized by incomplete closure of the wall between the atria resulting in blood flow from the left to the right atria. {ECO:0000269|PubMed:15735645}. Note=The disease is caused by variants affecting the gene represented in this entry.; DISEASE: Cardiomyopathy, familial hypertrophic 14 (CMH14) [MIM:613251]: A…	adult heart development [GO:0007512]; ATP metabolic process [GO:0046034]; atrial cardiac muscle tissue morphogenesis [GO:0055009]; cardiac muscle contraction [GO:0060048]; cardiac muscle fiber development [GO:0048739]; cardiac muscle hypertrophy in response to stress [GO:0014898]; in utero embryonic development [GO:0001701]; muscle contraction [GO:0006936]; muscle filament sliding [GO:0030049]; m…	actin-dependent ATPase activity [GO:0030898]; actin filament binding [GO:0051015]; ATPase activity [GO:0016887]; ATP binding [GO:0005524]; calmodulin binding [GO:0005516]; microfilament motor activity [GO:0000146]; protein kinase binding [GO:0019901]	cytosol [GO:0005829]; muscle myosin complex [GO:0005859]; myofibril [GO:0030016]; myosin complex [GO:0016459]; myosin filament [GO:0032982]; sarcomere [GO:0030017]; stress fiber [GO:0001725]; Z disc [GO:0030018]	GO:0000146; GO:0001701; GO:0001725; GO:0002026; GO:0002027; GO:0005516; GO:0005524; GO:0005829; GO:0005859; GO:0006936; GO:0006941; GO:0007512; GO:0007522; GO:0008016; GO:0008217; GO:0014898; GO:0016459; GO:0016887; GO:0019901; GO:0030016; GO:0030017; GO:0030018; GO:0030049; GO:0030239; GO:0030898; GO:0032982; GO:0043462; GO:0045214; GO:0046034; GO:0048739; GO:0051015; GO:0055009; GO:0055010; GO:…	R-HSA-390522;	hsa:4624;	23.6763	23.8227	24.2107	24.4096	24.5455	24.2792	24.5514	22.6209	22.6282	22.9182	22.8189	22.8133	23.4637	22.9474
SLC28A3_Q9HAS3	0.388414	1.3287	1.27807	1.03077	1.13713	0.334703	0.560612	-0.616102	-0.731593	-0.879614	-0.0997828	-0.785978	-1.38715	-1.55818	SLC28A3	Solute carrier family 28 member 3	Q9HAS3	1.1547	9.0407e-07	0.00134089	-1.88609	sp|Q9HAS3|S28A3_HUMAN Solute carrier family 28 member 3 OS=Homo sapiens OX=9606 GN=SLC28A3 PE=1 SV=1	FUNCTION: Sodium-dependent, pyrimidine- and purine-selective. Involved in the homeostasis of endogenous nucleosides. Exhibits the transport characteristics of the nucleoside transport system cib or N3 subtype (N3/cib) (with marked transport of both thymidine and inosine). Employs a 2:1 sodium/nucleoside ratio. Also able to transport gemcitabine, 3'-azido-3'-deoxythymidine (AZT), ribavirin and 3-d…	SUBCELLULAR LOCATION: [Isoform 1]: Cell membrane {ECO:0000269|PubMed:21998139}; Multi-pass membrane protein {ECO:0000269|PubMed:21998139}.; SUBCELLULAR LOCATION: [Isoform 2]: Endoplasmic reticulum membrane; Multi-pass membrane protein.		nucleoside transmembrane transport [GO:1901642]; purine nucleobase transmembrane transport [GO:1904823]; purine nucleoside transmembrane transport [GO:0015860]; pyrimidine-containing compound transmembrane transport [GO:0072531]; pyrimidine nucleoside transport [GO:0015864]; uridine transport [GO:0015862]	nucleoside:sodium symporter activity [GO:0005415]; nucleoside transmembrane transporter activity [GO:0005337]; purine nucleobase transmembrane transporter activity [GO:0005345]; purine-specific nucleoside:sodium symporter activity [GO:0015390]; pyrimidine- and adenine-specific:sodium symporter activity [GO:0015389]; symporter activity [GO:0015293]; uridine transmembrane transporter activity [GO:0…	brush border membrane [GO:0031526]; endoplasmic reticulum membrane [GO:0005789]; integral component of plasma membrane [GO:0005887]; plasma membrane [GO:0005886]	GO:0005337; GO:0005345; GO:0005415; GO:0005789; GO:0005886; GO:0005887; GO:0015213; GO:0015293; GO:0015389; GO:0015390; GO:0015860; GO:0015862; GO:0015864; GO:0031526; GO:0072531; GO:1901642; GO:1904823	R-HSA-83936;	hsa:64078;	13.5581	14.5826	14.5275	14.258	14.3739	13.4996	13.7457	12.4635	12.3377	12.1764	13.0261	12.2784	11.6234	11.437
PNMA3_Q9UL41	0.311615	0.639273	1.23566	1.0422	1.07673	0.524411	1.47565	-0.987936	-1.19052	-0.271562	-0.98861	-1.13782	-0.997479	-0.731603	PNMA3	Paraneoplastic antigen Ma3	Q9UL41	1.05348	1.02763e-06	0.00134089	-0.755908	sp|Q9UL41|PNMA3_HUMAN Paraneoplastic antigen Ma3 OS=Homo sapiens OX=9606 GN=PNMA3 PE=2 SV=3		SUBCELLULAR LOCATION: Nucleus, nucleolus {ECO:0000250}.		positive regulation of apoptotic process [GO:0043065]	nucleic acid binding [GO:0003676]; zinc ion binding [GO:0008270]	nucleolus [GO:0005730]	GO:0003676; GO:0005730; GO:0008270; GO:0043065		hsa:29944;	14.6435	14.7809	15.0312	14.95	14.9645	14.7327	15.1319	14.0982	14.0132	14.3988	14.0979	14.0353	14.0942	14.2057
NPPA_P01160	-0.0408652	-0.952173	0.120313	-1.2728	-1.12546	-1.17319	-1.19274	1.23284	1.53489	1.37283	0.542472	0.42586	0.353702	0.17432	NPPA	Natriuretic peptides A;Atrial natriuretic factor	P01160	1.06656	1.56668e-06	0.00175222	1.06577	sp|P01160|ANF_HUMAN Natriuretic peptides A OS=Homo sapiens OX=9606 GN=NPPA PE=1 SV=1	FUNCTION: [Atrial natriuretic peptide]: Hormone that plays a key role in mediating cardio-renal homeostasis, and is involved in vascular remodeling and regulating energy metabolism (PubMed:8653797, PubMed:7595132, PubMed:2825692, PubMed:7720651, PubMed:8087923, PubMed:2532366, PubMed:22307324, PubMed:18835931, PubMed:21672517, PubMed:15741263, PubMed:16875975). Acts by specifically binding and st…	SUBCELLULAR LOCATION: [Long-acting natriuretic peptide]: Secreted {ECO:0000269|PubMed:2532366, ECO:0000269|PubMed:7955907, ECO:0000269|PubMed:7984506, ECO:0000269|PubMed:8653797}. Note=Detected in blood. {ECO:0000269|PubMed:2532366, ECO:0000269|PubMed:7955907, ECO:0000269|PubMed:7984506, ECO:0000269|PubMed:8653797}.; SUBCELLULAR LOCATION: [Vessel dilator]: Secreted {ECO:0000269|PubMed:2532366, EC…	DISEASE: Atrial standstill 2 (ATRST2) [MIM:615745]: A rare arrhythmia characterized by the absence of electrical and mechanical activity in the atria. Electrocardiographically, it is characterized by bradycardia, the absence of P waves, and a junctional narrow complex escape rhythm. {ECO:0000269|PubMed:23275345}. Note=The disease is caused by variants affecting the gene represented in this entry.…	amyloid fibril formation [GO:1990000]; aortic valve morphogenesis [GO:0003180]; cardiac conduction system development [GO:0003161]; cGMP biosynthetic process [GO:0006182]; cGMP-mediated signaling [GO:0019934]; female pregnancy [GO:0007565]; negative regulation of canonical Wnt signaling pathway [GO:0090090]; negative regulation of epidermal growth factor receptor signaling pathway [GO:0042059]; n…	hormone activity [GO:0005179]; hormone receptor binding [GO:0051427]; neuropeptide hormone activity [GO:0005184]; neuropeptide receptor binding [GO:0071855]; signaling receptor binding [GO:0005102]	cell projection [GO:0042995]; collagen-containing extracellular matrix [GO:0062023]; cytoplasm [GO:0005737]; extracellular region [GO:0005576]; extracellular space [GO:0005615]; nucleus [GO:0005634]; perikaryon [GO:0043204]; protein-containing complex [GO:0032991]	GO:0003085; GO:0003161; GO:0003180; GO:0005102; GO:0005179; GO:0005184; GO:0005576; GO:0005615; GO:0005634; GO:0005737; GO:0006182; GO:0006367; GO:0006457; GO:0007168; GO:0007218; GO:0007565; GO:0008217; GO:0010460; GO:0019934; GO:0032991; GO:0035994; GO:0042059; GO:0042311; GO:0042995; GO:0043204; GO:0043508; GO:0051427; GO:0060372; GO:0060452; GO:0062023; GO:0071855; GO:0090090; GO:1901841; GO:…	R-HSA-2032785;R-HSA-5578768;R-HSA-977225;	hsa:4878;	16.517	15.9139	16.6236	15.7018	15.7993	15.7677	15.7547	17.3599	17.5597	17.4525	16.903	16.8258	16.7781	16.6594
GNG5_P63218	0.152394	1.21099	0.461595	1.46875	1.18201	0.827301	0.819955	-0.948211	-0.423898	-1.12374	-0.346502	-1.28569	-1.37265	-0.622301	GNG5	Guanine nucleotide-binding protein G(I)/G(S)/G(O) subunit gamma-5	P63218	1.04994	2.25886e-06	0.00205972	-0.874489	sp|P63218|GBG5_HUMAN Guanine nucleotide-binding protein G(I)/G(S)/G(O) subunit gamma-5 OS=Homo sapiens OX=9606 GN=GNG5 PE=1 SV=3	FUNCTION: Guanine nucleotide-binding proteins (G proteins) are involved as a modulator or transducer in various transmembrane signaling systems. The beta and gamma chains are required for the GTPase activity, for replacement of GDP by GTP, and for G protein-effector interaction.	SUBCELLULAR LOCATION: Cell membrane {ECO:0000305}; Lipid-anchor {ECO:0000305}; Cytoplasmic side {ECO:0000305}.		G protein-coupled receptor signaling pathway [GO:0007186]; signal transduction [GO:0007165]	G-protein beta-subunit binding [GO:0031681]; GTPase activity [GO:0003924]; PDZ domain binding [GO:0030165]	extracellular exosome [GO:0070062]; G-protein beta/gamma-subunit complex [GO:0031680]; heterotrimeric G-protein complex [GO:0005834]; membrane [GO:0016020]; plasma membrane [GO:0005886]	GO:0003924; GO:0005834; GO:0005886; GO:0007165; GO:0007186; GO:0016020; GO:0030165; GO:0031680; GO:0031681; GO:0070062	R-HSA-1296041;R-HSA-163359;R-HSA-202040;R-HSA-381676;R-HSA-392170;R-HSA-392451;R-HSA-392851;R-HSA-400042;R-HSA-4086398;R-HSA-416476;R-HSA-416482;R-HSA-418217;R-HSA-418555;R-HSA-418592;R-HSA-418594;R-HSA-418597;R-HSA-420092;R-HSA-428930;R-HSA-432040;R-HSA-456926;R-HSA-500657;R-HSA-6814122;R-HSA-8964315;R-HSA-8964616;R-HSA-9009391;R-HSA-9660821;R-HSA-997272;	hsa:2787;	18.0236	18.5528	18.1782	18.6816	18.5383	18.361	18.3573	17.4734	17.7355	17.3857	17.7742	17.3047	17.2613	17.6364
COMT_P21964	0.173076	0.806245	1.45611	0.434285	0.416984	1.61348	1.2228	-1.12466	-1.08571	-1.09628	-0.768646	-0.935562	-0.622245	-0.489888	COMT	Catechol O-methyltransferase	P21964	1.06859	2.3678e-06	0.00205972	-1.16304	sp|P21964|COMT_HUMAN Catechol O-methyltransferase OS=Homo sapiens OX=9606 GN=COMT PE=1 SV=2	FUNCTION: Catalyzes the O-methylation, and thereby the inactivation, of catecholamine neurotransmitters and catechol hormones. Also shortens the biological half-lives of certain neuroactive drugs, like L-DOPA, alpha-methyl DOPA and isoproterenol. {ECO:0000269|PubMed:11559542, ECO:0000269|PubMed:21846718}.	SUBCELLULAR LOCATION: [Isoform Soluble]: Cytoplasm {ECO:0000269|PubMed:11559542}.; SUBCELLULAR LOCATION: [Isoform Membrane-bound]: Cell membrane {ECO:0000269|PubMed:21846718}; Single-pass type II membrane protein {ECO:0000269|PubMed:21846718}; Extracellular side {ECO:0000269|PubMed:21846718}.	DISEASE: Schizophrenia (SCZD) [MIM:181500]: A complex, multifactorial psychotic disorder or group of disorders characterized by disturbances in the form and content of thought (e.g. delusions, hallucinations), in mood (e.g. inappropriate affect), in sense of self and relationship to the external world (e.g. loss of ego boundaries, withdrawal), and in behavior (e.g bizarre or apparently purposeles…	catecholamine catabolic process [GO:0042424]; developmental process [GO:0032502]; dopamine metabolic process [GO:0042417]; methylation [GO:0032259]; neurotransmitter catabolic process [GO:0042135]	catechol O-methyltransferase activity [GO:0016206]; L-dopa O-methyltransferase activity [GO:0102084]; magnesium ion binding [GO:0000287]; O-methyltransferase activity [GO:0008171]; orcinol O-methyltransferase activity [GO:0102938]	axon [GO:0030424]; cytosol [GO:0005829]; dendrite [GO:0030425]; extracellular exosome [GO:0070062]; integral component of membrane [GO:0016021]; intracellular membrane-bounded organelle [GO:0043231]; membrane [GO:0016020]; plasma membrane [GO:0005886]	GO:0000287; GO:0005829; GO:0005886; GO:0008171; GO:0016020; GO:0016021; GO:0016206; GO:0030424; GO:0030425; GO:0032259; GO:0032502; GO:0042135; GO:0042417; GO:0042424; GO:0043231; GO:0070062; GO:0102084; GO:0102938	R-HSA-156581;R-HSA-379397;R-HSA-379398;R-HSA-9679191;	hsa:1312;	17.653	18.074	18.506	17.8267	17.8152	18.6106	18.3509	16.7903	16.8162	16.8092	17.027	16.916	17.1243	17.2123
HIST1H1D_P16402	0.708193	1.52102	0.609906	0.634524	0.971027	0.870325	0.736277	-0.592993	0.0211387	-1.01393	-0.676821	-1.02771	-1.86112	-0.899838	HIST1H1D	Histone H1.3	P16402	1.05671	2.66401e-06	0.00208566	-1.05612	sp|P16402|H13_HUMAN Histone H1.3 OS=Homo sapiens OX=9606 GN=HIST1H1D PE=1 SV=2	FUNCTION: Histone H1 protein binds to linker DNA between nucleosomes forming the macromolecular structure known as the chromatin fiber. Histones H1 are necessary for the condensation of nucleosome chains into higher-order structured fibers. Acts also as a regulator of individual gene transcription through chromatin remodeling, nucleosome spacing and DNA methylation (By similarity). {ECO:0000250}.	SUBCELLULAR LOCATION: Nucleus. Chromosome. Note=According to PubMed:15911621 more commonly found in euchromatin. According to PubMed:10997781 is associated with inactive chromatin.		chromosome condensation [GO:0030261]; negative regulation of chromatin silencing [GO:0031936]; negative regulation of DNA recombination [GO:0045910]; nucleosome assembly [GO:0006334]; nucleosome positioning [GO:0016584]	chromatin DNA binding [GO:0031490]; double-stranded DNA binding [GO:0003690]; nucleosomal DNA binding [GO:0031492]; RNA binding [GO:0003723]	chromatin [GO:0000785]; euchromatin [GO:0000791]; nucleosome [GO:0000786]; nucleus [GO:0005634]	GO:0000785; GO:0000786; GO:0000791; GO:0003690; GO:0003723; GO:0005634; GO:0006334; GO:0016584; GO:0030261; GO:0031490; GO:0031492; GO:0031936; GO:0045910	R-HSA-140342;R-HSA-2559584;	hsa:3007;	19.5845	20.081	19.5245	19.5395	19.7451	19.6835	19.6017	18.7897	19.1648	18.5325	18.7385	18.5241	18.015	18.6022
H1F0_P07305	0.426991	1.34153	0.595511	0.637498	1.0299	0.942961	1.12727	-0.727548	0.096571	-0.908376	-1.21885	-1.01385	-1.63677	-0.692839	H1F0	Histone H1.0;Histone H1.0, N-terminally processed	P07305	1.04407	3.27813e-06	0.00220216	-0.890226	sp|P07305|H10_HUMAN Histone H1.0 OS=Homo sapiens OX=9606 GN=H1F0 PE=1 SV=3	FUNCTION: Histones H1 are necessary for the condensation of nucleosome chains into higher-order structures. The histones H1.0 are found in cells that are in terminal stages of differentiation or that have low rates of cell division.	SUBCELLULAR LOCATION: Nucleus {ECO:0000255|PROSITE-ProRule:PRU00837, ECO:0000269|PubMed:18993075}. Chromosome {ECO:0000255|PROSITE-ProRule:PRU00837, ECO:0000269|PubMed:18993075}. Note=The RNA edited version has been localized to nuclear speckles. During mitosis, it appears in the vicinity of condensed chromosomes.		apoptotic DNA fragmentation [GO:0006309]; chromatin silencing [GO:0006342]; chromosome condensation [GO:0030261]; negative regulation of chromatin silencing [GO:0031936]; negative regulation of DNA recombination [GO:0045910]; negative regulation of transcription by RNA polymerase II [GO:0000122]; nucleosome assembly [GO:0006334]; nucleosome positioning [GO:0016584]; positive regulation of transcr…	chromatin DNA binding [GO:0031490]; double-stranded DNA binding [GO:0003690]; minor groove of adenine-thymine-rich DNA binding [GO:0003680]; nucleosomal DNA binding [GO:0031492]; RNA binding [GO:0003723]	actin cytoskeleton [GO:0015629]; chromatin [GO:0000785]; euchromatin [GO:0000791]; Golgi apparatus [GO:0005794]; nuclear body [GO:0016604]; nucleoplasm [GO:0005654]; nucleosome [GO:0000786]; nucleus [GO:0005634]; transcription repressor complex [GO:0017053]	GO:0000122; GO:0000785; GO:0000786; GO:0000791; GO:0003680; GO:0003690; GO:0003723; GO:0005634; GO:0005654; GO:0005794; GO:0006309; GO:0006334; GO:0006342; GO:0015629; GO:0016584; GO:0016604; GO:0017053; GO:0030261; GO:0031490; GO:0031492; GO:0031936; GO:0045910; GO:2000679	R-HSA-140342;R-HSA-2559584;	hsa:3005;	20.8655	21.3325	20.9516	20.973	21.1734	21.129	21.2231	20.276	20.6968	20.1836	20.0251	20.1298	19.8117	20.2937
GLRX2_Q9NS18	-0.42482	-0.936682	-0.882532	-1.08798	-0.886619	-1.3612	-0.896952	0.382224	0.766484	0.996318	1.00854	1.11606	0.867653	1.33952	GLRX2	Glutaredoxin-2, mitochondrial	Q9NS18	1.04751	3.37539e-06	0.00220216	0.79098	sp|Q9NS18|GLRX2_HUMAN Glutaredoxin-2, mitochondrial OS=Homo sapiens OX=9606 GN=GLRX2 PE=1 SV=1	FUNCTION: Glutathione-dependent oxidoreductase that facilitates the maintenance of mitochondrial redox homeostasis upon induction of apoptosis by oxidative stress. Involved in response to hydrogen peroxide and regulation of apoptosis caused by oxidative stress. Acts as a very efficient catalyst of monothiol reactions because of its high affinity for protein glutathione-mixed disulfides. Can recei…	SUBCELLULAR LOCATION: [Isoform 1]: Mitochondrion.; SUBCELLULAR LOCATION: [Isoform 2]: Nucleus.		aging [GO:0007568]; apoptotic process [GO:0006915]; cell differentiation [GO:0030154]; cell redox homeostasis [GO:0045454]; cellular response to superoxide [GO:0071451]; DNA protection [GO:0042262]; glutathione metabolic process [GO:0006749]; regulation of signal transduction [GO:0009966]; regulation of transcription, DNA-templated [GO:0006355]; response to hydrogen peroxide [GO:0042542]; respons…	2 iron, 2 sulfur cluster binding [GO:0051537]; arsenate reductase (glutaredoxin) activity [GO:0008794]; electron transfer activity [GO:0009055]; glutathione disulfide oxidoreductase activity [GO:0015038]; metal ion binding [GO:0046872]; protein disulfide isomerase activity [GO:0003756]; protein disulfide oxidoreductase activity [GO:0015035]	dendrite [GO:0030425]; intracellular membrane-bounded organelle [GO:0043231]; mitochondrial matrix [GO:0005759]; mitochondrion [GO:0005739]; neuronal cell body [GO:0043025]; nucleoplasm [GO:0005654]; nucleus [GO:0005634]	GO:0003756; GO:0005634; GO:0005654; GO:0005739; GO:0005759; GO:0006355; GO:0006749; GO:0006915; GO:0007568; GO:0008794; GO:0009055; GO:0009266; GO:0009966; GO:0010033; GO:0015035; GO:0015038; GO:0030154; GO:0030425; GO:0042262; GO:0042542; GO:0043025; GO:0043231; GO:0045454; GO:0046872; GO:0051537; GO:0051775; GO:0071451		hsa:51022;	16.8621	16.6433	16.6665	16.5787	16.6647	16.4619	16.6603	17.2071	17.3713	17.4696	17.4748	17.5208	17.4146	17.6163
TRH_P20396	0.0424398	0.767303	1.70709	-0.395742	0.78194	1.03907	1.53529	-0.710631	-0.865418	-0.457036	-1.41591	-0.938647	-0.961998	-0.127751	TRH	Pro-thyrotropin-releasing hormone;Thyrotropin-releasing hormone	P20396	1.09684	3.82237e-06	0.00230195	-1.51133	sp|P20396|TRH_HUMAN Pro-thyrotropin-releasing hormone OS=Homo sapiens OX=9606 GN=TRH PE=1 SV=1	FUNCTION: As a component of the hypothalamic-pituitary-thyroid axis, it controls the secretion of thyroid-stimulating hormone (TSH) and is involved in thyroid hormone synthesis regulation. It also operates as modulator of hair growth. It promotes hair-shaft elongation, prolongs the hair cycle growth phase (anagen) and antagonizes its termination (catagen) by TGFB2. It stimulates proliferation and…	SUBCELLULAR LOCATION: Secreted.		cell-cell signaling [GO:0007267]; eating behavior [GO:0042755]; G protein-coupled receptor signaling pathway [GO:0007186]; histamine metabolic process [GO:0001692]; hormone-mediated signaling pathway [GO:0009755]; negative regulation of feeding behavior [GO:2000252]; negative regulation of glutamate secretion [GO:0014050]; positive regulation of gamma-aminobutyric acid secretion [GO:0014054]; pos…	thyrotropin-releasing hormone activity [GO:0008437]	extracellular region [GO:0005576]; nucleus [GO:0005634]; plasma membrane [GO:0005886]; secretory granule [GO:0030141]	GO:0001666; GO:0001692; GO:0005576; GO:0005634; GO:0005886; GO:0007165; GO:0007186; GO:0007267; GO:0008437; GO:0009409; GO:0009749; GO:0009755; GO:0014050; GO:0014054; GO:0030141; GO:0032024; GO:0042755; GO:0045471; GO:0051412; GO:2000252	R-HSA-375276;R-HSA-416476;	hsa:7200;	16.4027	17.1027	18.0103	15.9795	17.1168	17.3652	17.8444	15.6754	15.526	15.9203	14.9943	15.4552	15.4327	16.2383
C7_P10643	-0.993123	-0.232847	-0.232686	-1.37873	-1.10765	-0.801844	-1.01453	0.611729	1.90906	1.39775	0.585444	0.639122	0.617826	0.000472275	C7	Complement component C7	P10643	1.03276	4.29353e-06	0.002401	0.602598	sp|P10643|CO7_HUMAN Complement component C7 OS=Homo sapiens OX=9606 GN=C7 PE=1 SV=2	FUNCTION: Constituent of the membrane attack complex (MAC) that plays a key role in the innate and adaptive immune response by forming pores in the plasma membrane of target cells. C7 serves as a membrane anchor.	SUBCELLULAR LOCATION: Secreted.	DISEASE: Complement component 7 deficiency (C7D) [MIM:610102]: A rare defect of the complement classical pathway associated with susceptibility to severe recurrent infections, predominantly by Neisseria gonorrhoeae or Neisseria meningitidis. {ECO:0000269|PubMed:8871666, ECO:0000269|PubMed:9218625, ECO:0000269|PubMed:9856499}. Note=Disease susceptibility is associated with variants affecting the g…	cellular sodium ion homeostasis [GO:0006883]; complement activation [GO:0006956]; complement activation, alternative pathway [GO:0006957]; complement activation, classical pathway [GO:0006958]; cytolysis [GO:0019835]; regulation of complement activation [GO:0030449]		extracellular exosome [GO:0070062]; extracellular region [GO:0005576]; membrane attack complex [GO:0005579]	GO:0005576; GO:0005579; GO:0006883; GO:0006956; GO:0006957; GO:0006958; GO:0019835; GO:0030449; GO:0070062	R-HSA-166665;R-HSA-977606;	hsa:730;	18.33	18.6083	18.6084	18.1888	18.2881	18.4	18.3221	18.9175	19.3924	19.2052	18.9078	18.9275	18.9197	18.6937
ASPH_Q12797	0.417763	1.90488	0.488605	0.757187	1.04434	0.478288	0.914963	-0.792785	-0.184738	-0.583182	-0.768893	-1.03874	-1.51462	-1.12307	ASPH	Aspartyl/asparaginyl beta-hydroxylase	Q12797	1.0314	5.49317e-06	0.00286707	-0.644986	sp|Q12797|ASPH_HUMAN Aspartyl/asparaginyl beta-hydroxylase OS=Homo sapiens OX=9606 GN=ASPH PE=1 SV=3	FUNCTION: [Isoform 1]: specifically hydroxylates an Asp or Asn residue in certain epidermal growth factor-like (EGF) domains of a number of proteins. {ECO:0000269|PubMed:11773073}.; FUNCTION: [Isoform 8]: membrane-bound Ca(2+)-sensing protein, which is a structural component of the ER-plasma membrane junctions. Isoform 8 regulates the activity of Ca(+2) released-activated Ca(+2) (CRAC) channels i…	SUBCELLULAR LOCATION: [Isoform 1]: Endoplasmic reticulum membrane; Single-pass type II membrane protein {ECO:0000250|UniProtKB:Q28056}.; SUBCELLULAR LOCATION: [Isoform 4]: Sarcoplasmic reticulum membrane; Single-pass type II membrane protein {ECO:0000305|PubMed:15485681}.; SUBCELLULAR LOCATION: [Isoform 8]: Endoplasmic reticulum membrane; Single-pass type II membrane protein {ECO:0000269|PubMed:2…	DISEASE: Facial dysmorphism, lens dislocation, anterior segment abnormalities, and spontaneous filtering blebs (FDLAB) [MIM:601552]: A syndrome characterized by dislocated crystalline lenses and anterior segment abnormalities in association with a distinctive facies involving flat cheeks and a beaked nose. Some affected individuals develop highly unusual non-traumatic conjunctival cysts (filterin…	activation of cysteine-type endopeptidase activity [GO:0097202]; activation of store-operated calcium channel activity [GO:0032237]; calcium ion homeostasis [GO:0055074]; calcium ion transmembrane transport [GO:0070588]; cellular response to calcium ion [GO:0071277]; detection of calcium ion [GO:0005513]; ion transmembrane transport [GO:0034220]; muscle contraction [GO:0006936]; peptidyl-aspartic…	calcium ion binding [GO:0005509]; electron transfer activity [GO:0009055]; ion channel binding [GO:0044325]; peptide-aspartate beta-dioxygenase activity [GO:0004597]; peptidyl-aspartic acid 3-dioxygenase activity [GO:0062101]; structural constituent of muscle [GO:0008307]; structural molecule activity [GO:0005198]	calcium channel complex [GO:0034704]; cortical endoplasmic reticulum [GO:0032541]; endoplasmic reticulum [GO:0005783]; endoplasmic reticulum membrane [GO:0005789]; integral component of endoplasmic reticulum membrane [GO:0030176]; integral component of membrane [GO:0016021]; junctional sarcoplasmic reticulum membrane [GO:0014701]; plasma membrane [GO:0005886]; sarcoplasmic reticulum lumen [GO:003…	GO:0004597; GO:0005198; GO:0005509; GO:0005513; GO:0005783; GO:0005789; GO:0005886; GO:0006936; GO:0008307; GO:0009055; GO:0010524; GO:0010649; GO:0010880; GO:0010881; GO:0014701; GO:0016021; GO:0030176; GO:0031585; GO:0032237; GO:0032541; GO:0033017; GO:0033018; GO:0033198; GO:0034220; GO:0034704; GO:0042264; GO:0044325; GO:0045862; GO:0045893; GO:0055074; GO:0060314; GO:0060316; GO:0062101; GO:…	R-HSA-2672351;R-HSA-5578775;	hsa:444;	21.0237	21.5826	21.0503	21.1512	21.2592	21.0464	21.2105	20.5686	20.7972	20.6474	20.5776	20.4762	20.2973	20.4445
NRAS_P01111	0.486225	1.4886	0.675433	0.61015	1.30985	0.600941	1.01879	-0.364243	-0.41333	-1.54865	-0.686756	-1.16531	-1.16317	-0.848541	NRAS	GTPase NRas	P01111	1.05685	6.05019e-06	0.00296043	-0.868511	sp|P01111|RASN_HUMAN GTPase NRas OS=Homo sapiens OX=9606 GN=NRAS PE=1 SV=1	FUNCTION: Ras proteins bind GDP/GTP and possess intrinsic GTPase activity. {ECO:0000269|PubMed:30712867}.	SUBCELLULAR LOCATION: Cell membrane {ECO:0000269|PubMed:15705808, ECO:0000269|PubMed:26701913}; Lipid-anchor {ECO:0000269|PubMed:15705808, ECO:0000269|PubMed:26701913}; Cytoplasmic side {ECO:0000269|PubMed:15705808, ECO:0000269|PubMed:26701913}. Golgi apparatus membrane {ECO:0000269|PubMed:15705808, ECO:0000269|PubMed:26701913}; Lipid-anchor {ECO:0000269|PubMed:15705808, ECO:0000269|PubMed:267019…	DISEASE: Leukemia, juvenile myelomonocytic (JMML) [MIM:607785]: An aggressive pediatric myelodysplastic syndrome/myeloproliferative disorder characterized by malignant transformation in the hematopoietic stem cell compartment with proliferation of differentiated progeny. Patients have splenomegaly, enlarged lymph nodes, rashes, and hemorrhages. {ECO:0000269|PubMed:17332249}. Note=The disease is c…	MAPK cascade [GO:0000165]; neutrophil degranulation [GO:0043312]; positive regulation of endothelial cell proliferation [GO:0001938]; Ras protein signal transduction [GO:0007265]; stimulatory C-type lectin receptor signaling pathway [GO:0002223]	GDP binding [GO:0019003]; G protein activity [GO:0003925]; GTPase activity [GO:0003924]; GTP binding [GO:0005525]; protein-containing complex binding [GO:0044877]	cytosol [GO:0005829]; endoplasmic reticulum membrane [GO:0005789]; extracellular exosome [GO:0070062]; Golgi apparatus [GO:0005794]; Golgi membrane [GO:0000139]; membrane [GO:0016020]; plasma membrane [GO:0005886]; tertiary granule membrane [GO:0070821]	GO:0000139; GO:0000165; GO:0001938; GO:0002223; GO:0003924; GO:0003925; GO:0005525; GO:0005789; GO:0005794; GO:0005829; GO:0005886; GO:0007265; GO:0016020; GO:0019003; GO:0043312; GO:0044877; GO:0070062; GO:0070821	R-HSA-112412;R-HSA-1169092;R-HSA-1236382;R-HSA-1250196;R-HSA-1250347;R-HSA-1433557;R-HSA-167044;R-HSA-171007;R-HSA-179812;R-HSA-180336;R-HSA-186763;R-HSA-1963640;R-HSA-210993;R-HSA-2179392;R-HSA-2424491;R-HSA-2428933;R-HSA-2871796;R-HSA-375165;R-HSA-442982;R-HSA-5218921;R-HSA-5621575;R-HSA-5637810;R-HSA-5654688;R-HSA-5654693;R-HSA-5654699;R-HSA-5654700;R-HSA-5654704;R-HSA-5654706;R-HSA-5654712;R-…	hsa:4893;	15.95	16.4423	16.043	16.0109	16.3545	16.0064	16.2116	15.5324	15.5083	14.9508	15.374	15.139	15.1401	15.2946
GGT3P_A6NGU5	0.592639	0.805924	0.980713	0.854859	-0.155473	1.63744	1.03269	-1.05185	-1.45641	-1.10129	-0.0602176	-1.35067	-0.389817	-0.338547	GGT3P	Putative gamma-glutamyltranspeptidase 3;Putative gamma-glutamyltranspeptidase 3 heavy chain;Putative gamma-glutamyltranspeptidase 3 light chain;Gamma-glutamyltranspeptidase 1;Gamma-glutamyltranspeptidase 1 heavy chain;Gamma-glutamyltranspeptidase 1 light chain;Inactive gamma-glutamyltranspeptidase 2	A6NGU5	1.04632	7.76907e-06	0.00357788	-0.767355	sp|A6NGU5|GGT3_HUMAN Putative glutathione hydrolase 3 proenzyme OS=Homo sapiens OX=9606 GN=GGT3P PE=5 SV=2;sp|P19440|GGT1_HUMAN Glutathione hydrolase 1 proenzyme OS=Homo sapiens OX=9606 GN=GGT1 PE=1 SV=2;sp|P36268|GGT2_HUMAN Inactive glutathione hydrolase	FUNCTION: Initiates extracellular glutathione (GSH) breakdown; catalyzes the transfer of the glutamyl moiety of glutathione to amino acids and dipeptide acceptors. {ECO:0000250}.	SUBCELLULAR LOCATION: Membrane {ECO:0000250}; Single-pass type II membrane protein {ECO:0000250}.		glutathione biosynthetic process [GO:0006750]; glutathione catabolic process [GO:0006751]; leukotriene D4 biosynthetic process [GO:1901750]; peptide modification [GO:0031179]; regulation of immune system process [GO:0002682]; regulation of inflammatory response [GO:0050727]; response to estradiol [GO:0032355]; response to lipopolysaccharide [GO:0032496]; response to tumor necrosis factor [GO:0034…	glutathione hydrolase activity [GO:0036374]; hypoglycin A gamma-glutamyl transpeptidase activity [GO:0102953]; leukotriene C4 gamma-glutamyl transferase activity [GO:0103068]; peptidyltransferase activity [GO:0000048]	extracellular exosome [GO:0070062]; integral component of membrane [GO:0016021]; plasma membrane [GO:0005886]	GO:0000048; GO:0002682; GO:0005886; GO:0006750; GO:0006751; GO:0007283; GO:0016021; GO:0031179; GO:0032355; GO:0032496; GO:0034612; GO:0036374; GO:0050727; GO:0070062; GO:0102953; GO:0103068; GO:1901750	R-HSA-174403;R-HSA-5423646;		17.2276	17.3272	17.4089	17.3501	16.8781	17.7157	17.4332	16.4593	16.2703	16.4362	16.9226	16.3197	16.7686	16.7926
AHNAK2_Q8IVF2	0.0865936	1.57603	1.03494	0.510426	0.899888	0.196404	1.63472	-0.612731	-0.443203	-0.582092	-1.0846	-0.930223	-1.35606	-0.930092	AHNAK2	Protein AHNAK2	Q8IVF2	1.04173	8.75129e-06	0.00380632	-0.904929	sp|Q8IVF2|AHNK2_HUMAN Protein AHNAK2 OS=Homo sapiens OX=9606 GN=AHNAK2 PE=1 SV=2		SUBCELLULAR LOCATION: Nucleus {ECO:0000250}.		regulation of RNA splicing [GO:0043484]		costamere [GO:0043034]; cytoplasm [GO:0005737]; cytoplasmic vesicle membrane [GO:0030659]; cytosol [GO:0005829]; nucleus [GO:0005634]; plasma membrane [GO:0005886]; sarcolemma [GO:0042383]; T-tubule [GO:0030315]; Z disc [GO:0030018]	GO:0005634; GO:0005737; GO:0005829; GO:0005886; GO:0030018; GO:0030315; GO:0030659; GO:0042383; GO:0043034; GO:0043484		hsa:113146;	22.1844	22.9787	22.6901	22.4104	22.6181	22.2429	23.01	21.8114	21.9018	21.8278	21.5598	21.6421	21.415	21.6422
FREM1_Q5H8C1	0.354165	1.18228	1.27749	0.20093	0.215124	1.5657	1.26455	-0.681213	-0.828777	-1.10686	-0.885098	-1.30027	-0.810974	-0.447042	FREM1	FRAS1-related extracellular matrix protein 1	Q5H8C1	1.04978	9.80688e-06	0.00403567	-0.782286	sp|Q5H8C1|FREM1_HUMAN FRAS1-related extracellular matrix protein 1 OS=Homo sapiens OX=9606 GN=FREM1 PE=1 SV=3	FUNCTION: Extracellular matrix protein that plays a role in epidermal differentiation and is required for epidermal adhesion during embryonic development. {ECO:0000250}.	SUBCELLULAR LOCATION: Secreted, extracellular space, extracellular matrix, basement membrane {ECO:0000250|UniProtKB:Q684R7}. Note=Localizes at the basement membrane zone of embryonic epidermis and hair follicles. {ECO:0000250|UniProtKB:Q684R7}.	DISEASE: Bifid nose, with or without anorectal and renal anomalies (BNAR) [MIM:608980]: A disease characterized by the presence of a bifid nose usually associated with renal agenesis and anorectal malformations. A bifid nose is a congenital deformity due to failure of the paired nasal processes to fuse to a single midline organ during early gestation. {ECO:0000269|PubMed:19732862}. Note=The disea…	cell communication [GO:0007154]; cell-matrix adhesion [GO:0007160]; craniofacial suture morphogenesis [GO:0097094]	carbohydrate binding [GO:0030246]; metal ion binding [GO:0046872]	basement membrane [GO:0005604]; extracellular region [GO:0005576]; integral component of membrane [GO:0016021]	GO:0005576; GO:0005604; GO:0007154; GO:0007160; GO:0016021; GO:0030246; GO:0046872; GO:0097094		hsa:158326;	16.2652	16.6393	16.6824	16.196	16.2024	16.8126	16.6765	15.7974	15.7308	15.6051	15.7053	15.5177	15.7388	15.9032
LAMA2_P24043	0.257161	1.53186	0.788376	0.49436	1.17849	0.972895	1.05772	-0.950788	-0.765211	-0.45755	-0.6495	-1.11901	-1.45157	-0.887244	LAMA2	Laminin subunit alpha-2	P24043	1.03431	1.03214e-05	0.00403567	-0.759443	sp|P24043|LAMA2_HUMAN Laminin subunit alpha-2 OS=Homo sapiens OX=9606 GN=LAMA2 PE=1 SV=4	FUNCTION: Binding to cells via a high affinity receptor, laminin is thought to mediate the attachment, migration and organization of cells into tissues during embryonic development by interacting with other extracellular matrix components.	SUBCELLULAR LOCATION: Secreted, extracellular space, extracellular matrix, basement membrane. Note=Major component.	DISEASE: Merosin-deficient congenital muscular dystrophy 1A (MDC1A) [MIM:607855]: Characterized by difficulty walking, hypotonia, proximal weakness, hyporeflexia, and white matter hypodensity on MRI. {ECO:0000269|PubMed:11591858, ECO:0000269|PubMed:12552556, ECO:0000269|PubMed:24611677, ECO:0000269|PubMed:27234031}. Note=The disease is caused by variants affecting the gene represented in this ent…	animal organ morphogenesis [GO:0009887]; axon guidance [GO:0007411]; cell adhesion [GO:0007155]; extracellular matrix organization [GO:0030198]; maintenance of blood-brain barrier [GO:0035633]; muscle organ development [GO:0007517]; positive regulation of synaptic transmission, cholinergic [GO:0032224]; regulation of cell adhesion [GO:0030155]; regulation of cell migration [GO:0030334]; regulatio…	extracellular matrix structural constituent [GO:0005201]; signaling receptor binding [GO:0005102]; structural molecule activity [GO:0005198]	basement membrane [GO:0005604]; collagen-containing extracellular matrix [GO:0062023]; dendritic spine [GO:0043197]; extracellular region [GO:0005576]; neuromuscular junction [GO:0031594]; sarcolemma [GO:0042383]; synaptic cleft [GO:0043083]	GO:0005102; GO:0005198; GO:0005201; GO:0005576; GO:0005604; GO:0007155; GO:0007411; GO:0007517; GO:0009887; GO:0009888; GO:0014037; GO:0030155; GO:0030198; GO:0030334; GO:0031594; GO:0032224; GO:0035633; GO:0042383; GO:0043083; GO:0043197; GO:0045995; GO:0062023	R-HSA-3000157;R-HSA-3000171;R-HSA-3000178;R-HSA-8874081;R-HSA-9619665;	hsa:3908;	22.6216	23.161	22.8464	22.7219	23.0115	22.9244	22.9603	22.1104	22.1889	22.3191	22.2379	22.0392	21.8984	22.1372
XKR8_Q9H6D3	0.681057	0.751361	0.541831	0.684413	0.73682	1.31457	1.14402	-0.983598	-0.905772	-1.80408	-0.360978	-1.53976	-0.291692	0.0318091	XKR8	XK-related protein 8;XK-related protein 8, processed form	Q9H6D3	1.04031	1.11081e-05	0.00403567	-0.657626	sp|Q9H6D3|XKR8_HUMAN XK-related protein 8 OS=Homo sapiens OX=9606 GN=XKR8 PE=1 SV=1	FUNCTION: Promotes phosphatidylserine exposure on apoptotic cell surface, possibly by mediating phospholipid scrambling. Phosphatidylserine is a specific marker only present at the surface of apoptotic cells and acts as a specific signal for engulfment. Has no effect on calcium-induced exposure of phosphatidylserine. Activated upon caspase cleavage, suggesting that it does not act prior the onset…	SUBCELLULAR LOCATION: Cell membrane {ECO:0000269|PubMed:23845944}; Multi-pass membrane protein {ECO:0000269|PubMed:23845944}.		apoptotic process involved in development [GO:1902742]; engulfment of apoptotic cell [GO:0043652]; establishment of localization in cell [GO:0051649]; phosphatidylserine exposure on apoptotic cell surface [GO:0070782]; tolerance induction to self antigen [GO:0002513]		integral component of membrane [GO:0016021]; membrane [GO:0016020]; plasma membrane [GO:0005886]	GO:0002513; GO:0005886; GO:0016020; GO:0016021; GO:0043652; GO:0051649; GO:0070782; GO:1902742		hsa:55113;	16.9095	16.9372	16.8548	16.9109	16.9315	17.1586	17.0916	16.255	16.2856	15.9324	16.4998	16.0364	16.5271	16.6543
COL2A1_P02458	0.486807	-0.0610977	0.644385	-0.286112	0.0542681	1.81837	1.57315	-1.14182	-1.09225	-0.825589	-0.791411	-1.42838	0.322229	0.727447	COL2A1	Collagen alpha-1(II) chain;Collagen alpha-1(II) chain;Chondrocalcin	P02458	1.04383	1.13405e-05	0.00403567	-0.928053	sp|P02458|CO2A1_HUMAN Collagen alpha-1(II) chain OS=Homo sapiens OX=9606 GN=COL2A1 PE=1 SV=3	FUNCTION: Type II collagen is specific for cartilaginous tissues. It is essential for the normal embryonic development of the skeleton, for linear growth and for the ability of cartilage to resist compressive forces.	SUBCELLULAR LOCATION: Secreted, extracellular space, extracellular matrix {ECO:0000255|PROSITE-ProRule:PRU00793}.	DISEASE: Spondyloepiphyseal dysplasia congenital type (SEDC) [MIM:183900]: Disorder characterized by disproportionate short stature and pleiotropic involvement of the skeletal and ocular systems. {ECO:0000269|PubMed:10678662, ECO:0000269|PubMed:11746045, ECO:0000269|PubMed:2339128, ECO:0000269|PubMed:2543071, ECO:0000269|PubMed:7757086, ECO:0000269|PubMed:8019561, ECO:0000269|PubMed:8325895, ECO:…	anterior head development [GO:0097065]; cartilage condensation [GO:0001502]; cartilage development [GO:0051216]; cartilage development involved in endochondral bone morphogenesis [GO:0060351]; cellular response to BMP stimulus [GO:0071773]; central nervous system development [GO:0007417]; chondrocyte differentiation [GO:0002062]; collagen fibril organization [GO:0030199]; embryonic skeletal joint…	extracellular matrix structural constituent [GO:0005201]; extracellular matrix structural constituent conferring tensile strength [GO:0030020]; identical protein binding [GO:0042802]; metal ion binding [GO:0046872]; MHC class II protein binding [GO:0042289]; platelet-derived growth factor binding [GO:0048407]; proteoglycan binding [GO:0043394]	basement membrane [GO:0005604]; collagen-containing extracellular matrix [GO:0062023]; collagen trimer [GO:0005581]; collagen type II trimer [GO:0005585]; endoplasmic reticulum lumen [GO:0005788]; extracellular matrix [GO:0031012]; extracellular region [GO:0005576]; extracellular space [GO:0005615]	GO:0001501; GO:0001502; GO:0001894; GO:0001958; GO:0002062; GO:0003007; GO:0005201; GO:0005576; GO:0005581; GO:0005585; GO:0005604; GO:0005615; GO:0005788; GO:0006029; GO:0007417; GO:0007601; GO:0007605; GO:0010468; GO:0030020; GO:0030198; GO:0030199; GO:0030903; GO:0031012; GO:0042289; GO:0042472; GO:0042802; GO:0043394; GO:0046872; GO:0048407; GO:0050776; GO:0051216; GO:0060021; GO:0060174; GO:…	R-HSA-1442490;R-HSA-1474244;R-HSA-1650814;R-HSA-186797;R-HSA-198933;R-HSA-2022090;R-HSA-216083;R-HSA-3000171;R-HSA-3000178;R-HSA-419037;R-HSA-8874081;R-HSA-8948216;	hsa:1280;	22.0117	21.5909	22.1327	21.4181	21.6795	23.0342	22.8459	20.761	20.7991	21.0038	21.0301	20.5409	21.8853	22.1965
ADRA2B_P18089	0.153422	1.24972	1.26703	0.757997	1.54455	0.424084	0.766017	-0.737937	-0.855796	-1.15145	-0.208426	-1.03024	-1.06862	-1.11035	ADRA2B	Alpha-2B adrenergic receptor	P18089	1.13228	1.21637e-05	0.00405449	-1.72385	sp|P18089|ADA2B_HUMAN Alpha-2B adrenergic receptor OS=Homo sapiens OX=9606 GN=ADRA2B PE=1 SV=4	FUNCTION: Alpha-2 adrenergic receptors mediate the catecholamine-induced inhibition of adenylate cyclase through the action of G proteins. The rank order of potency for agonists of this receptor is clonidine > norepinephrine > epinephrine = oxymetazoline > dopamine > p-tyramine = phenylephrine > serotonin > p-synephrine / p-octopamine. For antagonists, the rank order is yohimbine > chlorpromazine…	SUBCELLULAR LOCATION: Cell membrane {ECO:0000269|PubMed:23105096, ECO:0000269|PubMed:26811329, ECO:0000269|PubMed:27901063}; Multi-pass membrane protein {ECO:0000269|PubMed:23105096}. Note=Interaction with RAB26, GGA1, GGA2 and GGA3 mediates transport from the Golgi to the cell membrane. {ECO:0000269|PubMed:23105096, ECO:0000269|PubMed:26811329, ECO:0000269|PubMed:27901063}.	DISEASE: Epilepsy, familial adult myoclonic, 2 (FAME2) [MIM:607876]: A form of familial myoclonic epilepsy, a neurologic disorder characterized by cortical hand tremors, myoclonic jerks and occasional generalized or focal seizures with a non-progressive or very slowly progressive disease course. Usually, myoclonic tremor is the presenting symptom, characterized by tremulous finger movements and m…	activation of MAPK activity [GO:0000187]; activation of protein kinase B activity [GO:0032148]; adenylate cyclase-activating adrenergic receptor signaling pathway [GO:0071880]; adrenergic receptor signaling pathway [GO:0071875]; cell-cell signaling [GO:0007267]; female pregnancy [GO:0007565]; G protein-coupled receptor signaling pathway [GO:0007186]; negative regulation of epinephrine secretion […	alpha2-adrenergic receptor activity [GO:0004938]; epinephrine binding [GO:0051379]; G protein-coupled receptor activity [GO:0004930]	cell surface [GO:0009986]; cytosol [GO:0005829]; integral component of plasma membrane [GO:0005887]; intracellular membrane-bounded organelle [GO:0043231]; plasma membrane [GO:0005886]	GO:0000187; GO:0003056; GO:0004930; GO:0004938; GO:0005829; GO:0005886; GO:0005887; GO:0007186; GO:0007267; GO:0007565; GO:0009986; GO:0010700; GO:0030168; GO:0032148; GO:0032811; GO:0035624; GO:0043231; GO:0043410; GO:0045666; GO:0045777; GO:0051379; GO:0070474; GO:0071875; GO:0071880	R-HSA-390696;R-HSA-392023;R-HSA-418594;R-HSA-418597;	hsa:151;	14.0441	15.1174	15.1344	14.636	15.4061	14.3091	14.6439	13.1715	13.0561	12.7667	13.6899	12.8853	12.8477	12.8069
MOSPD2_Q8NHP6	0.0889897	1.71756	1.23116	-0.593054	0.350634	0.159388	1.03196	-0.761701	0.598773	0.39359	-1.9841	-0.536345	-1.16755	-0.529307	MOSPD2	Motile sperm domain-containing protein 2	Q8NHP6	1.03795	1.36707e-05	0.00405449	-0.526642	sp|Q8NHP6|MSPD2_HUMAN Motile sperm domain-containing protein 2 OS=Homo sapiens OX=9606 GN=MOSPD2 PE=1 SV=1	FUNCTION: Endoplasmic reticulum-anchored receptor which modulates interorganelle contacts by interacting with other organelle-bound proteins via their FFAT motif (PubMed:29858488). Might have a more important role in endoplasmic reticulum and endosomes contacts (PubMed:29858488). Promotes migration of primary monocytes and neutrophils, in response to various chemokines (PubMed:28137892). {ECO:000…	SUBCELLULAR LOCATION: Endoplasmic reticulum membrane {ECO:0000269|PubMed:28137892, ECO:0000269|PubMed:29858488}; Single-pass type IV membrane protein {ECO:0000269|PubMed:29858488}. Note=Localization to contact sites involving the endoplasmic reticulum and several organelles is regulated by interaction with proteins containing FFAT motif. {ECO:0000269|PubMed:29858488}.		chemotaxis [GO:0006935]; neutrophil degranulation [GO:0043312]; positive regulation of monocyte chemotaxis [GO:0090026]; positive regulation of neutrophil chemotaxis [GO:0090023]		endoplasmic reticulum [GO:0005783]; endoplasmic reticulum-endosome membrane contact site [GO:0140284]; endoplasmic reticulum membrane [GO:0005789]; integral component of plasma membrane [GO:0005887]; membrane [GO:0016020]; organelle membrane contact site [GO:0044232]; plasma membrane [GO:0005886]; specific granule membrane [GO:0035579]	GO:0005783; GO:0005789; GO:0005886; GO:0005887; GO:0006935; GO:0016020; GO:0035579; GO:0043312; GO:0044232; GO:0090023; GO:0090026; GO:0140284	R-HSA-6798695;	hsa:158747;	14.1812	14.9342	14.7093	13.8659	14.3022	14.2138	14.6172	13.7879	14.4169	14.3221	13.2227	13.8921	13.6003	13.8954
PROB1_E7EW31	0.131076	0.669455	0.0809592	1.16342	1.48072	0.337944	1.84389	-1.11842	-0.893088	-0.525626	-0.869146	-0.916477	-1.23508	-0.149624	PROB1	Proline-rich basic protein 1	E7EW31	1.06159	1.44074e-05	0.00405449	-0.937603	sp|E7EW31|PROB1_HUMAN Proline-rich basic protein 1 OS=Homo sapiens OX=9606 GN=PROB1 PE=2 SV=2						nucleoplasm [GO:0005654]	GO:0005654		hsa:389333;	15.7668	16.0764	15.738	16.3604	16.5428	15.8858	16.7516	15.0484	15.178	15.3893	15.1917	15.1645	14.9813	15.6054
OPHN1_O60890	-1.14299	-1.3209	-0.641168	-0.492716	-0.163029	-1.17464	-1.11922	0.371142	0.992417	1.16319	1.57836	1.15977	0.472604	0.317182	OPHN1	Oligophrenin-1	O60890	1.02851	1.44788e-05	0.00405449	0.465278	sp|O60890|OPHN1_HUMAN Oligophrenin-1 OS=Homo sapiens OX=9606 GN=OPHN1 PE=1 SV=1	FUNCTION: Stimulates GTP hydrolysis of members of the Rho family. Its action on RHOA activity and signaling is implicated in growth and stabilization of dendritic spines, and therefore in synaptic function. Critical for the stabilization of AMPA receptors at postsynaptic sites. Critical for the regulation of synaptic vesicle endocytosis at presynaptic terminals. Required for the localization of N…	SUBCELLULAR LOCATION: Cell junction, synapse, postsynapse {ECO:0000250|UniProtKB:P0CAX5}. Cell junction, synapse, presynapse {ECO:0000250|UniProtKB:P0CAX5}. Cell projection, axon {ECO:0000250|UniProtKB:P0CAX5}. Cell projection, dendritic spine {ECO:0000250|UniProtKB:P0CAX5}. Cell projection, dendrite {ECO:0000250|UniProtKB:Q99J31}. Cytoplasm {ECO:0000250|UniProtKB:Q99J31}.	DISEASE: Mental retardation, X-linked, syndromic, OPHN1-related (MRXSO) [MIM:300486]: A disorder characterized by significantly below average general intellectual functioning associated with impairments in adaptive behavior and manifested during the developmental period. MRXSO patients manifest mental retardation associated with cerebellar hypoplasia and distinctive facial dysmorphism. {ECO:00002…	actin cytoskeleton organization [GO:0030036]; axon guidance [GO:0007411]; cell junction assembly [GO:0034329]; cell morphogenesis involved in neuron differentiation [GO:0048667]; cerebellar granule cell differentiation [GO:0021707]; cerebral cortex neuron differentiation [GO:0021895]; establishment of epithelial cell apical/basal polarity [GO:0045198]; maintenance of postsynaptic specialization s…	actin binding [GO:0003779]; GTPase activator activity [GO:0005096]; ionotropic glutamate receptor binding [GO:0035255]; phospholipid binding [GO:0005543]	actin cytoskeleton [GO:0015629]; cytoplasm [GO:0005737]; cytosol [GO:0005829]; dendritic spine [GO:0043197]; glutamatergic synapse [GO:0098978]; terminal bouton [GO:0043195]	GO:0003779; GO:0005096; GO:0005543; GO:0005737; GO:0005829; GO:0006930; GO:0007165; GO:0007399; GO:0007411; GO:0015629; GO:0021707; GO:0021895; GO:0030036; GO:0030100; GO:0030182; GO:0031175; GO:0034329; GO:0035023; GO:0035255; GO:0043195; GO:0043197; GO:0045198; GO:0048488; GO:0048667; GO:0051056; GO:0051966; GO:0098880; GO:0098978; GO:0099149; GO:1901799	R-HSA-194840;	hsa:4983;	16.2464	16.1985	16.3813	16.4213	16.5099	16.2378	16.2527	16.6536	16.8207	16.8666	16.9783	16.8657	16.6809	16.6391
CHST6_Q9GZX3	-0.00933717	0.529827	1.54555	0.0764474	-0.0964951	1.03881	1.5842	-1.54165	-1.18545	0.296657	-1.44798	-0.634833	-0.493048	0.337305	CHST6	Carbohydrate sulfotransferase 6	Q9GZX3	1.04511	1.45375e-05	0.00405449	-0.582048	sp|Q9GZX3|CHST6_HUMAN Carbohydrate sulfotransferase 6 OS=Homo sapiens OX=9606 GN=CHST6 PE=1 SV=1	FUNCTION: Sulfotransferase that utilizes 3'-phospho-5'-adenylyl sulfate (PAPS) as sulfonate donor to catalyze the transfer of sulfate to position 6 of non-reducing N-acetylglucosamine (GlcNAc) residues of keratan. Mediates sulfation of keratan in cornea. Keratan sulfate plays a central role in maintaining corneal transparency. Acts on the non-reducing terminal GlcNAc of short and long carbohydrat…	SUBCELLULAR LOCATION: Golgi apparatus membrane {ECO:0000250}; Single-pass type II membrane protein {ECO:0000250}.	DISEASE: Macular dystrophy, corneal (MCD) [MIM:217800]: An ocular disease characterized by bilateral, progressive corneal opacification, and reduced corneal sensitivity. Onset occurs in the first decade, usually between ages 5 and 9. Painful attacks with photophobia, foreign body sensations, and recurrent erosions occur in most patients. The disease is due to deposition of an unsulfated keratan s…	carbohydrate metabolic process [GO:0005975]; keratan sulfate biosynthetic process [GO:0018146]; N-acetylglucosamine metabolic process [GO:0006044]; sulfur compound metabolic process [GO:0006790]	N-acetylglucosamine 6-O-sulfotransferase activity [GO:0001517]	Golgi apparatus [GO:0005794]; Golgi membrane [GO:0000139]; integral component of membrane [GO:0016021]; trans-Golgi network [GO:0005802]	GO:0000139; GO:0001517; GO:0005794; GO:0005802; GO:0005975; GO:0006044; GO:0006790; GO:0016021; GO:0018146	R-HSA-2022854;R-HSA-3656225;	hsa:4166;	13.1907	13.4259	13.8691	13.2281	13.1526	13.648	13.886	12.5221	12.6775	13.3242	12.563	12.9177	12.9796	13.3419
HMGN4_O00479	0.955645	1.93205	-0.224473	0.117421	0.542192	0.385047	0.613187	-0.0113152	0.789534	-1.93185	-0.897834	-0.598765	-1.36244	-0.308395	HMGN4	High mobility group nucleosome-binding domain-containing protein 4	O00479	1.02657	1.48579e-05	0.00405449	-0.556558	sp|O00479|HMGN4_HUMAN High mobility group nucleosome-binding domain-containing protein 4 OS=Homo sapiens OX=9606 GN=HMGN4 PE=1 SV=3		SUBCELLULAR LOCATION: Nucleus {ECO:0000250}.		chromatin organization [GO:0006325]	chromatin binding [GO:0003682]; nucleosomal DNA binding [GO:0031492]	chromatin [GO:0000785]; nucleus [GO:0005634]	GO:0000785; GO:0003682; GO:0005634; GO:0006325; GO:0031492		hsa:10473;	21.6552	22.0953	21.1231	21.2773	21.4688	21.3979	21.5008	21.2192	21.5803	20.3535	20.8196	20.9544	20.6101	21.0853
ASB2_Q96Q27	-0.410311	-1.45861	-0.91287	-0.158034	-0.667582	-1.00188	-1.46415	1.35285	1.11473	0.374434	0.861369	0.782023	1.25507	0.332966	ASB2	Ankyrin repeat and SOCS box protein 2	Q96Q27	1.03477	1.50185e-05	0.00405449	0.634781	sp|Q96Q27|ASB2_HUMAN Ankyrin repeat and SOCS box protein 2 OS=Homo sapiens OX=9606 GN=ASB2 PE=1 SV=1	FUNCTION: Substrate-recognition component of a SCF-like ECS (Elongin-Cullin-SOCS-box protein) E3 ubiquitin-protein ligase complex which mediates the ubiquitination and subsequent proteasomal degradation of target proteins. {ECO:0000269|PubMed:15590664, ECO:0000269|PubMed:16325183}.; FUNCTION: [Isoform 1]: Enhances adhesion of hematopoietic cells to fibronectin through targeting of filamins FLNA a…			intracellular signal transduction [GO:0035556]; post-translational protein modification [GO:0043687]; protein ubiquitination [GO:0016567]; signal transduction [GO:0007165]; skeletal muscle cell differentiation [GO:0035914]; ubiquitin-dependent protein catabolic process [GO:0006511]		cytosol [GO:0005829]; ubiquitin ligase complex [GO:0000151]	GO:0000151; GO:0005829; GO:0006511; GO:0007165; GO:0016567; GO:0035556; GO:0035914; GO:0043687	R-HSA-8951664;R-HSA-983168;	hsa:51676;	18.4261	18.0426	18.2422	18.5184	18.332	18.2097	18.0406	19.0711	18.9839	18.7131	18.8913	18.8622	19.0353	18.698
MAP1LC3B_Q9GZQ8	-1.17821	-1.01963	-0.555468	-0.477158	-1.09942	-1.13455	-0.67959	0.620688	1.02827	0.240994	1.8535	0.806151	1.12969	0.46473	MAP1LC3B	Microtubule-associated proteins 1A/1B light chain 3B;Microtubule-associated proteins 1A/1B light chain 3 beta 2	Q9GZQ8	1.04985	1.644e-05	0.0042903	0.667698	sp|Q9GZQ8|MLP3B_HUMAN Microtubule-associated proteins 1A/1B light chain 3B OS=Homo sapiens OX=9606 GN=MAP1LC3B PE=1 SV=3;sp|A6NCE7|MP3B2_HUMAN Microtubule-associated proteins 1A/1B light chain 3 beta 2 OS=Homo sapiens OX=9606 GN=MAP1LC3B2 PE=2 SV=1	FUNCTION: Ubiquitin-like modifier involved in formation of autophagosomal vacuoles (autophagosomes). Plays a role in mitophagy which contributes to regulate mitochondrial quantity and quality by eliminating the mitochondria to a basal level to fulfill cellular energy requirements and preventing excess ROS production (PubMed:28017329). While LC3s are involved in elongation of the phagophore membra…	SUBCELLULAR LOCATION: Cytoplasm, cytoskeleton. Endomembrane system; Lipid-anchor. Cytoplasmic vesicle, autophagosome membrane {ECO:0000269|PubMed:20529957, ECO:0000269|PubMed:23459205, ECO:0000269|PubMed:33499712}; Lipid-anchor. Note=LC3-II binds to the autophagic membranes. LC3-II localizes with the mitochondrial inner membrane during Parkin-mediated mitophagy (PubMed:28017329). Localizes also t…		autophagosome assembly [GO:0000045]; autophagosome maturation [GO:0097352]; autophagy [GO:0006914]; autophagy of mitochondrion [GO:0000422]; cellular response to nitrogen starvation [GO:0006995]; cellular response to starvation [GO:0009267]; macroautophagy [GO:0016236]; mitophagy [GO:0000423]; pexophagy [GO:0000425]	microtubule binding [GO:0008017]; ubiquitin protein ligase binding [GO:0031625]	autophagosome [GO:0005776]; autophagosome membrane [GO:0000421]; axoneme [GO:0005930]; cytoplasmic vesicle [GO:0031410]; cytosol [GO:0005829]; endomembrane system [GO:0012505]; intracellular membrane-bounded organelle [GO:0043231]; microtubule [GO:0005874]; mitochondrion [GO:0005739]; organelle membrane [GO:0031090]	GO:0000045; GO:0000421; GO:0000422; GO:0000423; GO:0000425; GO:0005739; GO:0005776; GO:0005829; GO:0005874; GO:0005930; GO:0006914; GO:0006995; GO:0008017; GO:0009267; GO:0012505; GO:0016236; GO:0031090; GO:0031410; GO:0031625; GO:0043231; GO:0097352	R-HSA-1632852;R-HSA-5205685;R-HSA-8854214;R-HSA-8934903;R-HSA-9664873;R-HSA-9679504;R-HSA-9694676;	hsa:81631;	13.2793	13.3396	13.5162	13.546	13.3093	13.2959	13.469	13.9635	14.1186	13.8191	14.4324	14.0341	14.1571	13.9042
PCK2_Q16822	0.595338	0.598222	1.68313	0.0575215	0.986558	0.749864	1.21646	-1.15062	-1.3987	-0.601608	-1.35861	-0.861365	-0.448967	-0.0672182	PCK2	Phosphoenolpyruvate carboxykinase [GTP], mitochondrial	Q16822	1.02494	1.79535e-05	0.00441852	-0.475726	sp|Q16822|PCKGM_HUMAN Phosphoenolpyruvate carboxykinase [GTP], mitochondrial OS=Homo sapiens OX=9606 GN=PCK2 PE=1 SV=4	FUNCTION: Catalyzes the conversion of oxaloacetate (OAA) to phosphoenolpyruvate (PEP), the rate-limiting step in the metabolic pathway that produces glucose from lactate and other precursors derived from the citric acid cycle. {ECO:0000250}.	SUBCELLULAR LOCATION: Mitochondrion.	DISEASE: Mitochondrial phosphoenolpyruvate carboxykinase deficiency (M-PEPCKD) [MIM:261650]: Metabolic disorder resulting from impaired gluconeogenesis. It is a rare disease with less than 10 cases reported in the literature. Clinical characteristics include hypotonia, hepatomegaly, failure to thrive, lactic acidosis and hypoglycemia. Autopsy reveals fatty infiltration of both the liver and kidne…	cellular response to dexamethasone stimulus [GO:0071549]; cellular response to glucose stimulus [GO:0071333]; cellular response to insulin stimulus [GO:0032869]; cellular response to tumor necrosis factor [GO:0071356]; gluconeogenesis [GO:0006094]; glycerol biosynthetic process from pyruvate [GO:0046327]; hepatocyte differentiation [GO:0070365]; NADH oxidation [GO:0006116]; oxaloacetate metabolic…	GTP binding [GO:0005525]; manganese ion binding [GO:0030145]; phosphoenolpyruvate carboxykinase (GTP) activity [GO:0004613]; phosphoenolpyruvate carboxykinase activity [GO:0004611]	cytosol [GO:0005829]; mitochondrial matrix [GO:0005759]; mitochondrion [GO:0005739]	GO:0004611; GO:0004613; GO:0005525; GO:0005739; GO:0005759; GO:0005829; GO:0006094; GO:0006107; GO:0006116; GO:0019543; GO:0030145; GO:0032024; GO:0032496; GO:0032869; GO:0033993; GO:0042594; GO:0046327; GO:0070365; GO:0071333; GO:0071356; GO:0071549	R-HSA-70263;	hsa:5106;	19.4804	19.4812	19.788	19.3283	19.591	19.5241	19.6561	18.9866	18.9164	19.1418	18.9277	19.0684	19.185	19.293
SLC16A3_O15427	0.114373	1.39173	1.23182	0.438946	1.16731	0.553204	1.11341	-0.781713	-0.361154	-1.11332	-0.264198	-1.31478	-1.46566	-0.709955	SLC16A3	Monocarboxylate transporter 4	O15427	1.089	1.88059e-05	0.00441852	-1.42031	sp|O15427|MOT4_HUMAN Monocarboxylate transporter 4 OS=Homo sapiens OX=9606 GN=SLC16A3 PE=1 SV=1	FUNCTION: Proton-linked monocarboxylate transporter. Catalyzes the rapid transport across the plasma membrane of many monocarboxylates such as lactate, pyruvate, branched-chain oxo acids derived from leucine, valine and isoleucine, and the ketone bodies acetoacetate, beta-hydroxybutyrate and acetate (By similarity). {ECO:0000250}.	SUBCELLULAR LOCATION: Cell membrane; Multi-pass membrane protein.		leukocyte migration [GO:0050900]; monocarboxylic acid transport [GO:0015718]; plasma membrane lactate transport [GO:0035879]; pyruvate metabolic process [GO:0006090]	lactate transmembrane transporter activity [GO:0015129]; monocarboxylic acid transmembrane transporter activity [GO:0008028]; RNA binding [GO:0003723]; symporter activity [GO:0015293]	apical plasma membrane [GO:0016324]; basolateral plasma membrane [GO:0016323]; integral component of membrane [GO:0016021]; integral component of plasma membrane [GO:0005887]; integral component of postsynaptic density membrane [GO:0099061]; lateral plasma membrane [GO:0016328]; membrane [GO:0016020]; nuclear membrane [GO:0031965]; parallel fiber to Purkinje cell synapse [GO:0098688]; plasma memb…	GO:0003723; GO:0005886; GO:0005887; GO:0006090; GO:0008028; GO:0015129; GO:0015293; GO:0015718; GO:0016020; GO:0016021; GO:0016323; GO:0016324; GO:0016328; GO:0031965; GO:0035879; GO:0050900; GO:0098688; GO:0099061	R-HSA-210991;R-HSA-433692;R-HSA-70268;	hsa:9123;	16.7635	17.8199	17.6876	17.0319	17.6343	17.1264	17.5897	16.0224	16.3702	15.7481	16.4504	15.5815	15.4567	16.0817
APOOL_Q6UXV4	-0.481136	-0.225195	-1.06152	-0.951928	-0.966039	-1.302	-1.28856	0.633209	0.864687	1.53134	0.95176	1.14387	0.463871	0.687647	APOOL	MICOS complex subunit MIC27	Q6UXV4	1.02899	1.91432e-05	0.00441852	0.56061	sp|Q6UXV4|MIC27_HUMAN MICOS complex subunit MIC27 OS=Homo sapiens OX=9606 GN=APOOL PE=1 SV=1	FUNCTION: Component of the MICOS complex, a large protein complex of the mitochondrial inner membrane that plays crucial roles in the maintenance of crista junctions, inner membrane architecture, and formation of contact sites to the outer membrane. Specifically binds to cardiolipin (in vitro) but not to the precursor lipid phosphatidylglycerol. Plays a crucial role in crista junction formation a…	SUBCELLULAR LOCATION: Mitochondrion inner membrane {ECO:0000269|PubMed:23704930, ECO:0000269|PubMed:25764979}; Multi-pass membrane protein {ECO:0000269|PubMed:23704930}. Mitochondrion {ECO:0000269|PubMed:25781180, ECO:0000269|PubMed:25997101}.		cristae formation [GO:0042407]; inner mitochondrial membrane organization [GO:0007007]; platelet degranulation [GO:0002576]		extracellular region [GO:0005576]; MIB complex [GO:0140275]; MICOS complex [GO:0061617]; mitochondrion [GO:0005739]; platelet alpha granule lumen [GO:0031093]; SAM complex [GO:0001401]	GO:0001401; GO:0002576; GO:0005576; GO:0005739; GO:0007007; GO:0031093; GO:0042407; GO:0061617; GO:0140275	R-HSA-114608;R-HSA-8949613;	hsa:139322;	19.4691	19.5491	19.2877	19.322	19.3175	19.2125	19.2167	19.8175	19.8899	20.0983	19.9171	19.9771	19.7646	19.8345
MARVELD2_Q8N4S9	0.212815	1.20608	0.853637	0.373596	1.01798	0.937197	1.36948	-0.661301	-0.613296	-1.78595	-0.847281	-1.32416	-0.586687	-0.152113	MARVELD2	MARVEL domain-containing protein 2	Q8N4S9	1.05552	1.91889e-05	0.00441852	-0.794946	sp|Q8N4S9|MALD2_HUMAN MARVEL domain-containing protein 2 OS=Homo sapiens OX=9606 GN=MARVELD2 PE=1 SV=2	FUNCTION: Plays a role in the formation of tricellular tight junctions and of epithelial barriers (By similarity). Required for normal hearing via its role in the separation of the endolymphatic and perilymphatic spaces of the organ of Corti in the inner ear, and for normal survival of hair cells in the organ of Corti (PubMed:17186462). {ECO:0000250|UniProtKB:Q3UZP0, ECO:0000269|PubMed:17186462}.	SUBCELLULAR LOCATION: Cell membrane {ECO:0000269|PubMed:28661558}; Multi-pass membrane protein {ECO:0000305}. Cell junction, tight junction {ECO:0000269|PubMed:28661558}. Note=Found at tricellular contacts. {ECO:0000269|PubMed:28661558}.	DISEASE: Deafness, autosomal recessive, 49 (DFNB49) [MIM:610153]: A form of non-syndromic sensorineural hearing loss. Sensorineural deafness results from damage to the neural receptors of the inner ear, the nerve pathways to the brain, or the area of the brain that receives sound information. {ECO:0000269|PubMed:17186462}. Note=The disease is caused by variants affecting the gene represented in t…	bicellular tight junction assembly [GO:0070830]; cell-cell junction organization [GO:0045216]; establishment of endothelial barrier [GO:0061028]; sensory perception of sound [GO:0007605]		apical plasma membrane [GO:0016324]; basolateral plasma membrane [GO:0016323]; bicellular tight junction [GO:0005923]; cell junction [GO:0030054]; cytoplasm [GO:0005737]; cytoplasmic vesicle [GO:0031410]; integral component of membrane [GO:0016021]; paranodal junction [GO:0033010]; Schmidt-Lanterman incisure [GO:0043220]; tricellular tight junction [GO:0061689]	GO:0005737; GO:0005923; GO:0007605; GO:0016021; GO:0016323; GO:0016324; GO:0030054; GO:0031410; GO:0033010; GO:0043220; GO:0045216; GO:0061028; GO:0061689; GO:0070830		hsa:153562;	14.8144	15.2773	15.113	14.8893	15.1896	15.152	15.3534	14.4071	14.4294	13.883	14.3204	14.0982	14.4418	14.6444
LDHD_Q86WU2	0.11564	1.03541	1.19264	0.876014	1.414	0.189589	0.987756	-1.43318	-1.61883	0.0754065	-0.681883	-0.83137	-0.708191	-0.613002	LDHD	Probable D-lactate dehydrogenase, mitochondrial	Q86WU2	1.05002	2.07883e-05	0.00465004	-0.80361	sp|Q86WU2|LDHD_HUMAN Probable D-lactate dehydrogenase, mitochondrial OS=Homo sapiens OX=9606 GN=LDHD PE=1 SV=1	FUNCTION: Involved in D-lactate, but not L-lactate catabolic process. {ECO:0000269|PubMed:30931947}.	SUBCELLULAR LOCATION: Mitochondrion {ECO:0000250|UniProtKB:Q7TNG8}.	DISEASE: D-lactic aciduria with gout (DLACD) [MIM:245450]: An autosomal recessive metabolic disorder characterized by D-lactic aciduria in the presence of normal plasma lactic acid. {ECO:0000269|PubMed:30931947}. Note=The disease is caused by variants affecting the gene represented in this entry.	lactate catabolic process [GO:1903457]	D-lactate dehydrogenase (cytochrome) activity [GO:0004458]; D-lactate dehydrogenase activity [GO:0008720]; FAD binding [GO:0071949]; flavin adenine dinucleotide binding [GO:0050660]	mitochondrial inner membrane [GO:0005743]; mitochondrion [GO:0005739]	GO:0004458; GO:0005739; GO:0005743; GO:0008720; GO:0050660; GO:0071949; GO:1903457	R-HSA-1268020;	hsa:197257;	16.525	16.9702	17.0463	16.893	17.1534	16.5608	16.9471	15.7753	15.6855	16.5055	16.139	16.0666	16.1262	16.1723
MATN2_O00339	-0.0179958	2	1.02725	0.0908859	0.692186	0.903521	0.663	-1.01671	-0.0631722	-0.211121	-0.619294	-1.34586	-1.32028	-0.881116	MATN2	Matrilin-2	O00339	1.04945	2.13974e-05	0.00465333	-0.977087	sp|O00339|MATN2_HUMAN Matrilin-2 OS=Homo sapiens OX=9606 GN=MATN2 PE=1 SV=4	FUNCTION: Involved in matrix assembly. {ECO:0000250}.	SUBCELLULAR LOCATION: Secreted.			calcium ion binding [GO:0005509]; extracellular matrix structural constituent [GO:0005201]	collagen-containing extracellular matrix [GO:0062023]; extracellular matrix [GO:0031012]; extracellular region [GO:0005576]	GO:0005201; GO:0005509; GO:0005576; GO:0031012; GO:0062023		hsa:4147;	20.2346	21.561	20.8896	20.3028	20.6796	20.812	20.6613	19.6088	20.2063	20.1136	19.8578	19.4025	19.4186	19.6938
DSG2_Q14126	0.129773	1.52063	0.941197	0.0369114	0.836347	0.98852	1.28717	-1.27911	-0.0844505	-0.317074	-0.714576	-1.14855	-1.57989	-0.616876	DSG2	Desmoglein-2	Q14126	1.03325	2.38698e-05	0.00505071	-0.685819	sp|Q14126|DSG2_HUMAN Desmoglein-2 OS=Homo sapiens OX=9606 GN=DSG2 PE=1 SV=2	FUNCTION: Component of intercellular desmosome junctions. Involved in the interaction of plaque proteins and intermediate filaments mediating cell-cell adhesion.	SUBCELLULAR LOCATION: Cell membrane; Single-pass type I membrane protein. Cell junction, desmosome.	DISEASE: Arrhythmogenic right ventricular dysplasia, familial, 10 (ARVD10) [MIM:610193]: A congenital heart disease characterized by infiltration of adipose and fibrous tissue into the right ventricle and loss of myocardial cells, resulting in ventricular and supraventricular arrhythmias. {ECO:0000269|PubMed:16773573, ECO:0000269|PubMed:19863551, ECO:0000269|PubMed:20031617, ECO:0000269|PubMed:21…	bundle of His cell-Purkinje myocyte adhesion involved in cell communication [GO:0086073]; cell adhesion [GO:0007155]; cell-cell adhesion [GO:0098609]; cornification [GO:0070268]; desmosome organization [GO:0002934]; homophilic cell adhesion via plasma membrane adhesion molecules [GO:0007156]; keratinization [GO:0031424]; maternal process involved in female pregnancy [GO:0060135]; Purkinje myocyte…	calcium ion binding [GO:0005509]; cell adhesion molecule binding [GO:0050839]; cell adhesive protein binding involved in bundle of His cell-Purkinje myocyte communication [GO:0086083]	apical plasma membrane [GO:0016324]; cell-cell junction [GO:0005911]; cell junction [GO:0030054]; cell surface [GO:0009986]; cornified envelope [GO:0001533]; desmosome [GO:0030057]; extracellular exosome [GO:0070062]; integral component of membrane [GO:0016021]; intercalated disc [GO:0014704]; intracellular membrane-bounded organelle [GO:0043231]; lateral plasma membrane [GO:0016328]; plasma memb…	GO:0001533; GO:0002934; GO:0003165; GO:0005509; GO:0005886; GO:0005911; GO:0007155; GO:0007156; GO:0009986; GO:0014704; GO:0016021; GO:0016324; GO:0016328; GO:0030054; GO:0030057; GO:0031424; GO:0032570; GO:0043231; GO:0050839; GO:0060135; GO:0070062; GO:0070268; GO:0086073; GO:0086083; GO:0086091; GO:0098609; GO:0098911	R-HSA-351906;R-HSA-6805567;R-HSA-6809371;	hsa:1829;	21.0229	21.6045	21.3622	20.9841	21.3184	21.382	21.5069	20.4338	20.9333	20.8361	20.6698	20.4884	20.308	20.7107
ACPP_P15309	-0.0553742	-0.153313	1.34703	-0.152791	0.278438	1.3814	1.82831	-1.22633	-1.25622	-0.549291	-0.644553	-1.06631	-0.511529	0.780525	ACPP	Prostatic acid phosphatase;PAPf39	P15309	1.07447	2.54588e-05	0.00511136	-0.885567	sp|P15309|PPAP_HUMAN Prostatic acid phosphatase OS=Homo sapiens OX=9606 GN=ACPP PE=1 SV=3	FUNCTION: A non-specific tyrosine phosphatase that dephosphorylates a diverse number of substrates under acidic conditions (pH 4-6) including alkyl, aryl, and acyl orthophosphate monoesters and phosphorylated proteins (PubMed:10506173, PubMed:15280042, PubMed:20498373, PubMed:9584846). Has lipid phosphatase activity and inactivates lysophosphatidic acid in seminal plasma (PubMed:10506173, PubMed:…	SUBCELLULAR LOCATION: [Isoform 1]: Secreted {ECO:0000305|PubMed:17638863}.; SUBCELLULAR LOCATION: [Isoform 2]: Cell membrane {ECO:0000269|PubMed:17638863, ECO:0000269|PubMed:17897319, ECO:0000269|PubMed:20498373}; Single-pass type I membrane protein {ECO:0000255}. Lysosome membrane {ECO:0000269|PubMed:17638863, ECO:0000269|PubMed:17897319}; Single-pass type I membrane protein {ECO:0000255}. Nucle…		adenosine metabolic process [GO:0046085]; dephosphorylation [GO:0016311]; lysosome organization [GO:0007040]; neutrophil degranulation [GO:0043312]; nucleotide metabolic process [GO:0009117]; positive regulation of adenosine receptor signaling pathway [GO:0060168]; purine nucleobase metabolic process [GO:0006144]; regulation of sensory perception of pain [GO:0051930]; thiamine metabolic process […	5'-nucleotidase activity [GO:0008253]; acid phosphatase activity [GO:0003993]; identical protein binding [GO:0042802]; lysophosphatidic acid phosphatase activity [GO:0052642]; phosphatase activity [GO:0016791]; protein homodimerization activity [GO:0042803]; protein tyrosine phosphatase activity [GO:0004725]; thiamine phosphate phosphatase activity [GO:0042131]	azurophil granule membrane [GO:0035577]; cytosol [GO:0005829]; extracellular exosome [GO:0070062]; extracellular space [GO:0005615]; filopodium [GO:0030175]; integral component of membrane [GO:0016021]; lysosomal membrane [GO:0005765]; lysosome [GO:0005764]; nucleus [GO:0005634]; plasma membrane [GO:0005886]; vesicle membrane [GO:0012506]	GO:0003993; GO:0004725; GO:0005615; GO:0005634; GO:0005764; GO:0005765; GO:0005829; GO:0005886; GO:0006144; GO:0006772; GO:0007040; GO:0008253; GO:0009117; GO:0012506; GO:0016021; GO:0016311; GO:0016791; GO:0030175; GO:0035577; GO:0042131; GO:0042802; GO:0042803; GO:0043312; GO:0046085; GO:0051930; GO:0052642; GO:0060168; GO:0070062	R-HSA-6798695;	hsa:55;	12.2955	12.2277	13.2672	12.228	12.5268	13.291	13.6006	11.4843	11.4636	11.9533	11.8873	11.5951	11.9795	12.8747
DCLK2_Q8N568	-0.362906	-0.84793	-0.813504	-1.42462	-1.08271	-0.392375	-0.918131	1.26685	1.00681	1.19122	-0.434945	1.21918	1.18816	0.404904	DCLK2	Serine/threonine-protein kinase DCLK2	Q8N568	1.02523	2.60555e-05	0.00511136	0.466786	sp|Q8N568|DCLK2_HUMAN Serine/threonine-protein kinase DCLK2 OS=Homo sapiens OX=9606 GN=DCLK2 PE=1 SV=4	FUNCTION: Protein kinase with a significantly reduced C(a2+)/CAM affinity and dependence compared to other members of the CaMK family. May play a role in the down-regulation of CRE-dependent gene activation probably by phosphorylation of the CREB coactivator CRTC2/TORC2 and the resulting retention of TORC2 in the cytoplasm (By similarity). {ECO:0000250}.	SUBCELLULAR LOCATION: Cytoplasm, cytoskeleton. Note=Colocalizes with microtubules. {ECO:0000250}.		intracellular signal transduction [GO:0035556]; microtubule cytoskeleton organization [GO:0000226]	ATP binding [GO:0005524]; protein serine kinase activity [GO:0106310]; protein threonine kinase activity [GO:0106311]	cytoplasm [GO:0005737]; cytoskeleton [GO:0005856]	GO:0000226; GO:0005524; GO:0005737; GO:0005856; GO:0035556; GO:0106310; GO:0106311		hsa:166614;	18.6351	18.4994	18.509	18.3381	18.4338	18.6268	18.4798	19.0908	19.0181	19.0697	18.6149	19.0775	19.0688	18.8498
EYA4_O95677	0.575898	-1.33956	-1.67536	-0.848327	-0.883335	-0.253964	-0.748854	1.53333	0.443208	0.482378	-0.290151	0.839704	0.962767	1.20227	EYA4	Eyes absent homolog 4	O95677	1.06689	2.6115e-05	0.00511136	0.921446	sp|O95677|EYA4_HUMAN Eyes absent homolog 4 OS=Homo sapiens OX=9606 GN=EYA4 PE=1 SV=2	FUNCTION: Tyrosine phosphatase that specifically dephosphorylates 'Tyr-142' of histone H2AX (H2AXY142ph). 'Tyr-142' phosphorylation of histone H2AX plays a central role in DNA repair and acts as a mark that distinguishes between apoptotic and repair responses to genotoxic stress. Promotes efficient DNA repair by dephosphorylating H2AX, promoting the recruitment of DNA repair complexes containing …	SUBCELLULAR LOCATION: Cytoplasm {ECO:0000250|UniProtKB:Q99502}. Nucleus {ECO:0000250|UniProtKB:Q99502}.	DISEASE: Deafness, autosomal dominant, 10 (DFNA10) [MIM:601316]: A form of non-syndromic sensorineural hearing loss. Sensorineural deafness results from damage to the neural receptors of the inner ear, the nerve pathways to the brain, or the area of the brain that receives sound information. {ECO:0000269|PubMed:11159937, ECO:0000269|PubMed:22938506, ECO:0000269|PubMed:25809937, ECO:0000269|PubMed…	anatomical structure development [GO:0048856]; anatomical structure morphogenesis [GO:0009653]; cell differentiation [GO:0030154]; DNA repair [GO:0006281]; histone dephosphorylation [GO:0016576]; multicellular organism development [GO:0007275]; negative regulation of extrinsic apoptotic signaling pathway in absence of ligand [GO:2001240]; positive regulation of DNA repair [GO:0045739]; sensory pe…	metal ion binding [GO:0046872]; protein tyrosine phosphatase activity [GO:0004725]	cytoplasm [GO:0005737]; nucleus [GO:0005634]	GO:0004725; GO:0005634; GO:0005737; GO:0006281; GO:0007275; GO:0007601; GO:0007605; GO:0009653; GO:0016576; GO:0030154; GO:0045739; GO:0046872; GO:0048856; GO:2001240	R-HSA-5693565;	hsa:2070;	14.5958	13.4017	13.1924	13.708	13.6861	14.0785	13.77	15.1926	14.5131	14.5375	14.0559	14.7603	14.837	14.9863
ARMCX2_Q7L311	-0.0451343	-0.741942	-1.70439	-0.683131	-0.748786	-1.09123	-1.16853	0.993768	1.21268	0.828749	0.53114	1.2757	0.72134	0.619768	ARMCX2	Armadillo repeat-containing X-linked protein 2	Q7L311	1.02654	2.71947e-05	0.00519287	0.491771	sp|Q7L311|ARMX2_HUMAN Armadillo repeat-containing X-linked protein 2 OS=Homo sapiens OX=9606 GN=ARMCX2 PE=2 SV=1	FUNCTION: May regulate the dynamics and distribution of mitochondria in neural cells. {ECO:0000250|UniProtKB:Q6A058}.	SUBCELLULAR LOCATION: Mitochondrion {ECO:0000250|UniProtKB:Q6A058}. Mitochondrion outer membrane {ECO:0000250|UniProtKB:Q8BHS6}; Single-pass membrane protein {ECO:0000255}.				integral component of membrane [GO:0016021]; mitochondrial outer membrane [GO:0005741]; mitochondrion [GO:0005739]	GO:0005739; GO:0005741; GO:0016021		hsa:9823;	18.7644	18.5705	18.3026	18.5868	18.5686	18.4732	18.4517	19.0536	19.1146	19.0077	18.9249	19.1321	18.9778	18.9495
SLC6A4_P31645	-0.0459841	1.33583	-0.553077	1.45251	1.38057	0.670899	0.559787	-0.590323	-0.131627	-1.78704	0.331723	-0.685166	-1.20502	-0.733089	SLC6A4	Sodium-dependent serotonin transporter	P31645	1.04963	2.8835e-05	0.00537498	-0.682461	sp|P31645|SC6A4_HUMAN Sodium-dependent serotonin transporter OS=Homo sapiens OX=9606 GN=SLC6A4 PE=1 SV=1	FUNCTION: Serotonin transporter whose primary function in the central nervous system involves the regulation of serotonergic signaling via transport of serotonin molecules from the synaptic cleft back into the pre-synaptic terminal for re-utilization. Plays a key role in mediating regulation of the availability of serotonin to other receptors of serotonergic systems. Terminates the action of sero…	SUBCELLULAR LOCATION: Cell membrane {ECO:0000269|PubMed:16870614, ECO:0000269|PubMed:17506858, ECO:0000269|PubMed:27049939}; Multi-pass membrane protein {ECO:0000250|UniProtKB:Q7K4Y6, ECO:0000269|PubMed:27049939}. Endomembrane system {ECO:0000269|PubMed:16870614}; Multi-pass membrane protein {ECO:0000255}. Endosome membrane {ECO:0000269|PubMed:16870614}; Multi-pass membrane protein {ECO:0000255}.…		brain morphogenesis [GO:0048854]; cellular response to cGMP [GO:0071321]; cellular response to retinoic acid [GO:0071300]; circadian rhythm [GO:0007623]; memory [GO:0007613]; monoamine transport [GO:0015844]; negative regulation of cerebellar granule cell precursor proliferation [GO:0021941]; negative regulation of neuron differentiation [GO:0045665]; negative regulation of organ growth [GO:00466…	actin filament binding [GO:0051015]; cocaine binding [GO:0019811]; identical protein binding [GO:0042802]; metal ion binding [GO:0046872]; monoamine transmembrane transporter activity [GO:0008504]; neurotransmitter transmembrane transporter activity [GO:0005326]; nitric-oxide synthase binding [GO:0050998]; serotonin:sodium symporter activity [GO:0005335]; serotonin binding [GO:0051378]; syntaxin-…	endomembrane system [GO:0012505]; endosome membrane [GO:0010008]; focal adhesion [GO:0005925]; integral component of plasma membrane [GO:0005887]; integral component of postsynaptic membrane [GO:0099055]; integral component of presynaptic membrane [GO:0099056]; membrane raft [GO:0045121]; neuron projection [GO:0043005]; plasma membrane [GO:0005886]; serotonergic synapse [GO:0099154]; synapse [GO:…	GO:0001666; GO:0005326; GO:0005335; GO:0005886; GO:0005887; GO:0005925; GO:0006836; GO:0007584; GO:0007613; GO:0007623; GO:0008504; GO:0009636; GO:0010008; GO:0010628; GO:0012505; GO:0014064; GO:0015844; GO:0017075; GO:0019811; GO:0021941; GO:0032227; GO:0032355; GO:0035176; GO:0035725; GO:0042136; GO:0042310; GO:0042493; GO:0042713; GO:0042802; GO:0043005; GO:0045121; GO:0045202; GO:0045665; GO:…	R-HSA-380615;	hsa:6532;	14.0705	14.7581	13.8182	14.8161	14.7803	14.4272	14.3719	13.7997	14.0279	13.2042	14.2585	13.7525	13.4938	13.7286
ERO1L_Q96HE7	0.0939404	1.95374	1.41735	0.275674	0.65201	0.426551	0.711135	-1.04279	-0.387117	-0.194504	-0.201913	-1.31503	-1.39134	-0.997708	ERO1L	ERO1-like protein alpha	Q96HE7	1.03881	3.18951e-05	0.00580714	-0.744032	sp|Q96HE7|ERO1A_HUMAN ERO1-like protein alpha OS=Homo sapiens OX=9606 GN=ERO1A PE=1 SV=2	FUNCTION: Oxidoreductase involved in disulfide bond formation in the endoplasmic reticulum. Efficiently reoxidizes P4HB/PDI, the enzyme catalyzing protein disulfide formation, in order to allow P4HB to sustain additional rounds of disulfide formation. Following P4HB reoxidation, passes its electrons to molecular oxygen via FAD, leading to the production of reactive oxygen species (ROS) in the cel…	SUBCELLULAR LOCATION: Endoplasmic reticulum membrane {ECO:0000269|PubMed:10671517, ECO:0000269|PubMed:14517240}; Peripheral membrane protein {ECO:0000269|PubMed:10671517, ECO:0000269|PubMed:14517240}; Lumenal side {ECO:0000269|PubMed:10671517, ECO:0000269|PubMed:14517240}. Note=The association with ERP44 is essential for its retention in the endoplasmic reticulum.		animal organ senescence [GO:0010260]; brown fat cell differentiation [GO:0050873]; cell redox homeostasis [GO:0045454]; cellular protein modification process [GO:0006464]; cellular response to hypoxia [GO:0071456]; cellular response to oxidative stress [GO:0034599]; chaperone cofactor-dependent protein refolding [GO:0051085]; endoplasmic reticulum unfolded protein response [GO:0030968]; extracell…	oxidoreductase activity [GO:0016491]; oxidoreductase activity, acting on a sulfur group of donors, disulfide as acceptor [GO:0016671]; protein disulfide isomerase activity [GO:0003756]; protein disulfide oxidoreductase activity [GO:0015035]	dendrite [GO:0030425]; endoplasmic reticulum [GO:0005783]; endoplasmic reticulum lumen [GO:0005788]; endoplasmic reticulum membrane [GO:0005789]; intracellular membrane-bounded organelle [GO:0043231]; membrane [GO:0016020]	GO:0003756; GO:0005783; GO:0005788; GO:0005789; GO:0006457; GO:0006464; GO:0009266; GO:0010260; GO:0015035; GO:0016020; GO:0016491; GO:0016671; GO:0018401; GO:0022417; GO:0030198; GO:0030425; GO:0030968; GO:0034599; GO:0034975; GO:0034976; GO:0043231; GO:0045454; GO:0050873; GO:0051085; GO:0051209; GO:0070059; GO:0071456	R-HSA-264876;R-HSA-3299685;	hsa:30001;	19.5858	20.4616	20.209	19.6714	19.8486	19.7425	19.8765	19.0506	19.3593	19.45	19.4465	18.9224	18.8865	19.0718
TGFB1I1_O43294	-0.0585567	-1.02293	-0.705846	-0.910707	-1.14812	-1.0633	-0.962707	1.0132	1.27061	1.85999	0.144851	0.944424	0.198502	0.440584	TGFB1I1	Transforming growth factor beta-1-induced transcript 1 protein	O43294	1.03624	3.26567e-05	0.00581066	0.672252	sp|O43294|TGFI1_HUMAN Transforming growth factor beta-1-induced transcript 1 protein OS=Homo sapiens OX=9606 GN=TGFB1I1 PE=1 SV=2	FUNCTION: Functions as a molecular adapter coordinating multiple protein-protein interactions at the focal adhesion complex and in the nucleus. Links various intracellular signaling modules to plasma membrane receptors and regulates the Wnt and TGFB signaling pathways. May also regulate SLC6A3 and SLC6A4 targeting to the plasma membrane hence regulating their activity. In the nucleus, functions a…	SUBCELLULAR LOCATION: Cell junction, focal adhesion. Nucleus matrix. Cytoplasm, cytoskeleton. Note=Associated with the actin cytoskeleton; colocalizes with stress fibers.		cell adhesion [GO:0007155]; cell fate commitment [GO:0045165]; epithelial cell differentiation [GO:0030855]; morphogenesis of embryonic epithelium [GO:0016331]; negative regulation of cell population proliferation [GO:0008285]; negative regulation of fat cell differentiation [GO:0045599]; negative regulation of transforming growth factor beta receptor signaling pathway [GO:0030512]; positive regu…	androgen receptor binding [GO:0050681]; I-SMAD binding [GO:0070411]; metal ion binding [GO:0046872]; Roundabout binding [GO:0048495]; transcription coactivator activity [GO:0003713]; transcription coregulator activity [GO:0003712]	cytoskeleton [GO:0005856]; cytosol [GO:0005829]; focal adhesion [GO:0005925]; nuclear matrix [GO:0016363]; plasma membrane [GO:0005886]	GO:0003712; GO:0003713; GO:0005829; GO:0005856; GO:0005886; GO:0005925; GO:0007155; GO:0008285; GO:0009408; GO:0010718; GO:0016055; GO:0016331; GO:0016363; GO:0030511; GO:0030512; GO:0030579; GO:0030855; GO:0045165; GO:0045599; GO:0045893; GO:0046872; GO:0048495; GO:0050681; GO:0070411		hsa:7041;	18.8604	18.474	18.601	18.5189	18.4238	18.4578	18.4981	19.2898	19.3929	19.6291	18.9419	19.2622	18.9634	19.0604
MPP2_Q14168	0.601299	0.609804	1.16727	0.895556	0.541913	1.29839	1.1818	-1.19252	-1.48425	-0.355012	-1.14292	-0.926398	-0.816983	-0.377942	MPP2	MAGUK p55 subfamily member 2	Q14168	1.02054	3.3789e-05	0.00585264	-0.384236	sp|Q14168|MPP2_HUMAN MAGUK p55 subfamily member 2 OS=Homo sapiens OX=9606 GN=MPP2 PE=1 SV=3	FUNCTION: Postsynaptic MAGUK scaffold protein that links CADM1 cell adhesion molecules to core components of the postsynaptic density (By similarity). In CA1 pyramidal neurons, required for synaptic KCNN2-containing channel function and long-term potentiation expression (By similarity). Seems to negatively regulate SRC function in epithelial cells (PubMed:19665017). {ECO:0000250|UniProtKB:D3ZAA9,…	SUBCELLULAR LOCATION: Cytoplasm, cytoskeleton {ECO:0000269|PubMed:19665017}. Membrane {ECO:0000269|PubMed:19665017}. Cell projection, dendrite {ECO:0000250|UniProtKB:Q9WV34}. Cell junction, synapse, postsynaptic density {ECO:0000250|UniProtKB:Q9WV34}. Note=Prominently expressed in the postsynaptic densities of dendritic spines, is also detected in dendritic shafts. {ECO:0000250|UniProtKB:Q9WV34}.		excitatory postsynaptic potential [GO:0060079]; long-term synaptic potentiation [GO:0060291]; protein homooligomerization [GO:0051260]		cytoplasm [GO:0005737]; cytoskeleton [GO:0005856]; dendrite membrane [GO:0032590]; dendritic shaft [GO:0043198]; dendritic spine [GO:0043197]; postsynaptic density [GO:0014069]	GO:0005737; GO:0005856; GO:0014069; GO:0032590; GO:0043197; GO:0043198; GO:0051260; GO:0060079; GO:0060291		hsa:4355;	19.0238	19.0256	19.1446	19.0866	19.0111	19.1726	19.1477	18.6406	18.5783	18.8195	18.6512	18.6974	18.7208	18.8146
CRMP1_Q14194	0.00698609	-1.24528	-1.6834	-0.601277	-1.35738	-0.347971	-0.73541	1.14466	0.645491	0.833885	0.336223	1.14962	1.22199	0.631875	CRMP1	Dihydropyrimidinase-related protein 1	Q14194	1.03371	3.43877e-05	0.00585264	0.646457	sp|Q14194|DPYL1_HUMAN Dihydropyrimidinase-related protein 1 OS=Homo sapiens OX=9606 GN=CRMP1 PE=1 SV=1	FUNCTION: Necessary for signaling by class 3 semaphorins and subsequent remodeling of the cytoskeleton (PubMed:25358863). Plays a role in axon guidance (PubMed:25358863). During the axon guidance process, acts downstream of SEMA3A to promote FLNA dissociation from F-actin which results in the rearrangement of the actin cytoskeleton and the collapse of the growth cone (PubMed:25358863). Involved i…	SUBCELLULAR LOCATION: Cytoplasm {ECO:0000269|PubMed:11562390}. Cytoplasm, cytoskeleton, microtubule organizing center, centrosome {ECO:0000269|PubMed:11562390}. Cytoplasm, cytoskeleton, spindle {ECO:0000269|PubMed:11562390}. Cell projection, growth cone {ECO:0000250|UniProtKB:P97427}. Cytoplasm, cytoskeleton {ECO:0000250|UniProtKB:P97427}. Perikaryon {ECO:0000250|UniProtKB:P97427}. Note=Associate…		axon guidance [GO:0007411]; microtubule cytoskeleton organization [GO:0000226]; negative regulation of actin filament binding [GO:1904530]; negative regulation of neuron projection development [GO:0010977]; nervous system development [GO:0007399]; nucleobase-containing compound metabolic process [GO:0006139]	filamin binding [GO:0031005]; hydrolase activity, acting on carbon-nitrogen (but not peptide) bonds [GO:0016810]; identical protein binding [GO:0042802]	centrosome [GO:0005813]; cytosol [GO:0005829]; growth cone [GO:0030426]; midbody [GO:0030496]; nucleus [GO:0005634]; perikaryon [GO:0043204]; spindle [GO:0005819]	GO:0000226; GO:0005634; GO:0005813; GO:0005819; GO:0005829; GO:0006139; GO:0007399; GO:0007411; GO:0010977; GO:0016810; GO:0030426; GO:0030496; GO:0031005; GO:0042802; GO:0043204; GO:1904530	R-HSA-399956;	hsa:1400;	19.504	19.0289	18.8627	19.2732	18.9864	19.3693	19.2223	19.9356	19.7462	19.8177	19.6289	19.9375	19.965	19.7411
BAI2_O60241	0.644654	1.97298	0.375866	1.0049	0.850891	0.347853	0.0709136	-0.826425	0.0748147	-1.22684	0.146349	-0.820753	-1.74476	-0.870451	BAI2	Brain-specific angiogenesis inhibitor 2	O60241	1.032	3.5426e-05	0.00590106	-0.49086	sp|O60241|AGRB2_HUMAN Adhesion G protein-coupled receptor B2 OS=Homo sapiens OX=9606 GN=ADGRB2 PE=1 SV=2	FUNCTION: Orphan G-protein coupled receptor involved in cell adhesion and probably in cell-cell interactions. Activates NFAT-signaling pathway, a transcription factor, via the G-protein GNAZ (PubMed:20367554, PubMed:28891236). Involved in angiogenesis inhibition (By similarity). {ECO:0000250|UniProtKB:Q8CGM1, ECO:0000269|PubMed:20367554, ECO:0000269|PubMed:28891236}.	SUBCELLULAR LOCATION: Cell membrane {ECO:0000269|PubMed:28891236}; Multi-pass membrane protein {ECO:0000255}.		adenylate cyclase-activating G protein-coupled receptor signaling pathway [GO:0007189]; calcineurin-NFAT signaling cascade [GO:0033173]; cell surface receptor signaling pathway [GO:0007166]; G protein-coupled receptor signaling pathway [GO:0007186]; negative regulation of angiogenesis [GO:0016525]; peripheral nervous system development [GO:0007422]	G protein-coupled receptor activity [GO:0004930]	integral component of membrane [GO:0016021]; integral component of plasma membrane [GO:0005887]; plasma membrane [GO:0005886]	GO:0004930; GO:0005886; GO:0005887; GO:0007166; GO:0007186; GO:0007189; GO:0007422; GO:0016021; GO:0016525; GO:0033173		hsa:576;	15.7953	16.2285	15.7076	15.9128	15.8625	15.6985	15.6082	15.3155	15.6094	15.1849	15.6328	15.3174	15.016	15.3012
COL4A1_P02462	-0.174113	1.34162	1.33364	-0.320187	0.211146	1.33215	1.57506	-1.08519	-0.372273	-0.573114	-0.842191	-1.21311	-1.06866	-0.144772	COL4A1	Collagen alpha-1(IV) chain;Arresten	P02462	1.04898	3.88072e-05	0.00632961	-0.914438	sp|P02462|CO4A1_HUMAN Collagen alpha-1(IV) chain OS=Homo sapiens OX=9606 GN=COL4A1 PE=1 SV=4	FUNCTION: Type IV collagen is the major structural component of glomerular basement membranes (GBM), forming a 'chicken-wire' meshwork together with laminins, proteoglycans and entactin/nidogen. {ECO:0000250|UniProtKB:P02463}.; FUNCTION: Arresten, comprising the C-terminal NC1 domain, inhibits angiogenesis and tumor formation. The C-terminal half is found to possess the anti-angiogenic activity. …	SUBCELLULAR LOCATION: Secreted, extracellular space, extracellular matrix, basement membrane {ECO:0000250|UniProtKB:P02463}.	DISEASE: Hereditary angiopathy with nephropathy aneurysms and muscle cramps (HANAC) [MIM:611773]: The clinical renal manifestations include hematuria and bilateral large cysts. Histologic analysis revealed complex basement membrane defects in kidney and skin. The systemic angiopathy appears to affect both small vessels and large arteries. {ECO:0000269|PubMed:18160688, ECO:0000269|PubMed:20818663}…	basement membrane organization [GO:0071711]; blood vessel morphogenesis [GO:0048514]; brain development [GO:0007420]; branching involved in blood vessel morphogenesis [GO:0001569]; cellular response to amino acid stimulus [GO:0071230]; collagen-activated tyrosine kinase receptor signaling pathway [GO:0038063]; collagen fibril organization [GO:0030199]; epithelial cell differentiation [GO:0030855]…	extracellular matrix structural constituent [GO:0005201]; extracellular matrix structural constituent conferring tensile strength [GO:0030020]; platelet-derived growth factor binding [GO:0048407]	basement membrane [GO:0005604]; collagen-containing extracellular matrix [GO:0062023]; collagen type IV trimer [GO:0005587]; endoplasmic reticulum lumen [GO:0005788]; extracellular matrix [GO:0031012]; extracellular region [GO:0005576]; extracellular space [GO:0005615]	GO:0001569; GO:0005201; GO:0005576; GO:0005587; GO:0005604; GO:0005615; GO:0005788; GO:0007420; GO:0007528; GO:0030020; GO:0030198; GO:0030199; GO:0030855; GO:0031012; GO:0038063; GO:0048407; GO:0048514; GO:0061304; GO:0061333; GO:0062023; GO:0071230; GO:0071711	R-HSA-1442490;R-HSA-1474244;R-HSA-1650814;R-HSA-186797;R-HSA-2022090;R-HSA-216083;R-HSA-2214320;R-HSA-2243919;R-HSA-3000157;R-HSA-3000171;R-HSA-3000178;R-HSA-3000480;R-HSA-419037;R-HSA-8948216;	hsa:1282;	19.0209	19.9363	19.9315	18.9326	19.2535	19.9306	20.0773	18.4706	18.9012	18.7799	18.6174	18.3933	18.4806	19.0386
NPTXR_O95502	-0.218526	-0.855664	-0.353546	-0.386595	-0.748541	-1.24224	-1.84772	0.621519	0.87432	2	0.576761	0.527868	0.749934	0.298842	NPTXR	Neuronal pentraxin receptor	O95502	1.03939	4.08414e-05	0.00652545	0.601893	sp|O95502|NPTXR_HUMAN Neuronal pentraxin receptor OS=Homo sapiens OX=9606 GN=NPTXR PE=3 SV=2	FUNCTION: May be involved in mediating uptake of synaptic material during synapse remodeling or in mediating the synaptic clustering of AMPA glutamate receptors at a subset of excitatory synapses. {ECO:0000250}.	SUBCELLULAR LOCATION: Membrane {ECO:0000305}; Single-pass type II membrane protein {ECO:0000305}.		regulation of postsynaptic neurotransmitter receptor activity [GO:0098962]	metal ion binding [GO:0046872]	glutamatergic synapse [GO:0098978]; integral component of membrane [GO:0016021]	GO:0016021; GO:0046872; GO:0098962; GO:0098978		hsa:23467;	15.5012	15.2638	15.4509	15.4386	15.3037	15.1197	14.894	15.8143	15.9085	16.3293	15.7976	15.7793	15.8621	15.694
ZNF22_P17026	0.0259576	1.1227	0.731027	0.876455	1.50192	0.723506	0.997479	-0.954821	-0.17783	-0.98444	-0.120134	-1.04461	-1.29129	-1.40592	ZNF22	Zinc finger protein 22	P17026	1.0337	4.23277e-05	0.00662767	-0.619425	sp|P17026|ZNF22_HUMAN Zinc finger protein 22 OS=Homo sapiens OX=9606 GN=ZNF22 PE=1 SV=3	FUNCTION: Binds DNA through the consensus sequence 5'-CAATG-3'. May be involved in transcriptional regulation and may play a role in tooth formation (By similarity). {ECO:0000250}.	SUBCELLULAR LOCATION: Nucleus {ECO:0000250}.		odontogenesis [GO:0042476]; regulation of transcription, DNA-templated [GO:0006355]; regulation of transcription by RNA polymerase II [GO:0006357]	DNA binding [GO:0003677]; DNA-binding transcription factor activity, RNA polymerase II-specific [GO:0000981]; RNA polymerase II transcription regulatory region sequence-specific DNA binding [GO:0000977]; zinc ion binding [GO:0008270]	nucleoplasm [GO:0005654]; nucleus [GO:0005634]	GO:0000977; GO:0000981; GO:0003677; GO:0005634; GO:0005654; GO:0006355; GO:0006357; GO:0008270; GO:0042476		hsa:7570;	18.698	19.0957	18.9537	19.0064	19.2332	18.9509	19.0503	18.3424	18.6241	18.3316	18.645	18.3098	18.2204	18.1788
STAT4_Q14765	-0.610534	-0.671324	-0.545043	-1.66949	-0.942771	-0.607682	-0.20371	0.58061	0.550307	2	-0.339137	0.809524	0.423077	0.906228	STAT4	Signal transducer and activator of transcription 4	Q14765	1.06665	4.44158e-05	0.00681826	1.00721	sp|Q14765|STAT4_HUMAN Signal transducer and activator of transcription 4 OS=Homo sapiens OX=9606 GN=STAT4 PE=1 SV=1	FUNCTION: Carries out a dual function: signal transduction and activation of transcription. Involved in IL12 signaling.	SUBCELLULAR LOCATION: Cytoplasm. Nucleus. Note=Translocated into the nucleus in response to phosphorylation.	DISEASE: Systemic lupus erythematosus 11 (SLEB11) [MIM:612253]: A chronic, relapsing, inflammatory, and often febrile multisystemic disorder of connective tissue, characterized principally by involvement of the skin, joints, kidneys and serosal membranes. It is of unknown etiology, but is thought to represent a failure of the regulatory mechanisms of the autoimmune system. The disease is marked b…	cytokine-mediated signaling pathway [GO:0019221]; defense response [GO:0006952]; interleukin-12-mediated signaling pathway [GO:0035722]; interleukin-21-mediated signaling pathway [GO:0038114]; interleukin-23-mediated signaling pathway [GO:0038155]; interleukin-35-mediated signaling pathway [GO:0070757]; positive regulation of transcription by RNA polymerase II [GO:0045944]; receptor signaling pat…	DNA-binding transcription factor activity [GO:0003700]; DNA-binding transcription factor activity, RNA polymerase II-specific [GO:0000981]; identical protein binding [GO:0042802]; RNA polymerase II cis-regulatory region sequence-specific DNA binding [GO:0000978]	chromatin [GO:0000785]; cytosol [GO:0005829]; nucleoplasm [GO:0005654]	GO:0000785; GO:0000978; GO:0000981; GO:0003700; GO:0005654; GO:0005829; GO:0006357; GO:0006952; GO:0007259; GO:0019221; GO:0035722; GO:0038114; GO:0038155; GO:0042127; GO:0042802; GO:0043434; GO:0045944; GO:0070757	R-HSA-8854691;R-HSA-8950505;R-HSA-8984722;R-HSA-9020591;R-HSA-9020933;R-HSA-9020958;	hsa:6775;	15.2065	15.1657	15.2505	14.4955	14.9834	15.2084	15.4796	16.0062	15.9859	17.174	15.3887	16.1599	15.9005	16.2249
CWF19L1_Q69YN2	0.534963	0.472847	1.13551	1.35083	1.10541	0.766522	0.847139	-0.891159	-1.34675	-0.872524	-0.30422	-1.06325	-0.254842	-1.48047	CWF19L1	CWF19-like protein 1	Q69YN2	1.02494	4.6279e-05	0.00691288	-0.413574	sp|Q69YN2|C19L1_HUMAN CWF19-like protein 1 OS=Homo sapiens OX=9606 GN=CWF19L1 PE=1 SV=2			DISEASE: Spinocerebellar ataxia, autosomal recessive, 17 (SCAR17) [MIM:616127]: A form of spinocerebellar ataxia, a clinically and genetically heterogeneous group of cerebellar disorders. Patients show progressive incoordination of gait and often poor coordination of hands, speech and eye movements, due to degeneration of the cerebellum with variable involvement of the brainstem and spinal cord. …	mRNA splicing, via spliceosome [GO:0000398]	RNA lariat debranching enzyme activator activity [GO:0061632]	post-mRNA release spliceosomal complex [GO:0071014]	GO:0000398; GO:0061632; GO:0071014		hsa:55280;	16.9114	16.897	17.0513	17.1015	17.0443	16.9654	16.9842	16.5792	16.473	16.5835	16.7159	16.5391	16.7274	16.4419
DBN1_Q16643	-0.535154	-1.3036	-0.407261	-1.30713	-1.12005	-0.965727	-0.492442	1.52846	1.52085	0.71568	0.492274	0.388468	0.581615	0.904018	DBN1	Drebrin	Q16643	1.02403	4.73851e-05	0.00691288	0.475316	sp|Q16643|DREB_HUMAN Drebrin OS=Homo sapiens OX=9606 GN=DBN1 PE=1 SV=4	FUNCTION: Actin cytoskeleton-organizing protein that plays a role in the formation of cell projections (PubMed:20215400). Required for actin polymerization at immunological synapses (IS) and for the recruitment of the chemokine receptor CXCR4 to IS (PubMed:20215400). Plays a role in dendritic spine morphogenesis and organization, including the localization of the dopamine receptor DRD1 to the den…	SUBCELLULAR LOCATION: Cytoplasm {ECO:0000269|PubMed:20215400, ECO:0000269|PubMed:28966017, ECO:0000269|PubMed:8838578}. Cell projection, dendrite {ECO:0000269|PubMed:8838578}. Cytoplasm, cell cortex {ECO:0000269|PubMed:20215400}. Cell junction {ECO:0000269|PubMed:20215400}. Cell projection, growth cone {ECO:0000250|UniProtKB:Q9QXS6}. Note=In the absence of antigen, evenly distributed throughout s…	DISEASE: Alzheimer disease (AD) [MIM:104300]: Alzheimer disease is a neurodegenerative disorder characterized by progressive dementia, loss of cognitive abilities, and deposition of fibrillar amyloid proteins as intraneuronal neurofibrillary tangles, extracellular amyloid plaques and vascular amyloid deposits. The major constituents of these plaques are neurotoxic amyloid-beta protein 40 and amyl…	actin filament organization [GO:0007015]; cell communication by chemical coupling [GO:0010643]; cell communication by electrical coupling [GO:0010644]; cytoplasmic sequestering of protein [GO:0051220]; in utero embryonic development [GO:0001701]; maintenance of protein location in cell [GO:0032507]; neural precursor cell proliferation [GO:0061351]; neuron projection morphogenesis [GO:0048812]; po…	actin binding [GO:0003779]; actin filament binding [GO:0051015]; cadherin binding [GO:0045296]; profilin binding [GO:0005522]	actin cytoskeleton [GO:0015629]; actomyosin [GO:0042641]; cortical actin cytoskeleton [GO:0030864]; cortical cytoskeleton [GO:0030863]; cytoplasm [GO:0005737]; cytoskeleton [GO:0005856]; dendrite [GO:0030425]; gap junction [GO:0005921]; glutamatergic synapse [GO:0098978]; growth cone [GO:0030426]; lamellipodium [GO:0030027]; plasma membrane [GO:0005886]; postsynaptic cytosol [GO:0099524]; postsyn…	GO:0001701; GO:0003779; GO:0005522; GO:0005737; GO:0005856; GO:0005886; GO:0005921; GO:0007015; GO:0010643; GO:0010644; GO:0014069; GO:0015629; GO:0030027; GO:0030425; GO:0030426; GO:0030427; GO:0030833; GO:0030863; GO:0030864; GO:0031915; GO:0032507; GO:0042641; GO:0045211; GO:0045296; GO:0045773; GO:0048168; GO:0048812; GO:0050773; GO:0051015; GO:0051220; GO:0061003; GO:0061351; GO:0098974; GO:…		hsa:1627;	19.8761	19.6676	19.9108	19.6667	19.7174	19.7593	19.8877	20.436	20.434	20.2155	20.1549	20.1267	20.1791	20.2666
STC1_P52823	-0.0654496	1.22066	1.41646	-0.519695	0.244991	1.41646	1.6119	-1.12108	-0.774935	-0.479142	-0.784584	-1.07335	-0.78444	-0.3078	STC1	Stanniocalcin-1	P52823	1.13849	4.76811e-05	0.00691288	-1.5364	sp|P52823|STC1_HUMAN Stanniocalcin-1 OS=Homo sapiens OX=9606 GN=STC1 PE=1 SV=1	FUNCTION: Stimulates renal phosphate reabsorption, and could therefore prevent hypercalcemia.	SUBCELLULAR LOCATION: Secreted.		bone development [GO:0060348]; cellular calcium ion homeostasis [GO:0006874]; cellular response to cAMP [GO:0071320]; cellular response to glucocorticoid stimulus [GO:0071385]; cellular response to hypoxia [GO:0071456]; chondrocyte proliferation [GO:0035988]; decidualization [GO:0046697]; embryo implantation [GO:0007566]; endothelial cell morphogenesis [GO:0001886]; growth plate cartilage axis sp…	hormone activity [GO:0005179]; identical protein binding [GO:0042802]	apical plasma membrane [GO:0016324]; cytoplasm [GO:0005737]; extracellular space [GO:0005615]; nucleus [GO:0005634]	GO:0001503; GO:0001886; GO:0003421; GO:0005179; GO:0005615; GO:0005634; GO:0005737; GO:0006874; GO:0007566; GO:0010596; GO:0016324; GO:0030336; GO:0033280; GO:0035988; GO:0042802; GO:0044070; GO:0046697; GO:0051926; GO:0060348; GO:0071320; GO:0071385; GO:0071456; GO:0086004; GO:0090280; GO:1903403		hsa:6781;	11.7962	13.0949	13.2926	11.3375	12.1097	13.2926	13.49	10.7303	11.0798	11.3785	11.0701	10.7785	11.0702	11.5515
MTUS1_Q9ULD2	0.0833686	1.23122	1.26636	0.511279	0.673915	1.11139	1.2458	-0.8647	-0.784018	-1.73869	-0.527502	-0.93085	-0.749381	-0.528192	MTUS1	Microtubule-associated tumor suppressor 1	Q9ULD2	1.0336	5.03585e-05	0.00716831	-0.634137	sp|Q9ULD2|MTUS1_HUMAN Microtubule-associated tumor suppressor 1 OS=Homo sapiens OX=9606 GN=MTUS1 PE=1 SV=2	FUNCTION: Cooperates with AGTR2 to inhibit ERK2 activation and cell proliferation. May be required for AGTR2 cell surface expression. Together with PTPN6, induces UBE2V2 expression upon angiotensin-II stimulation. Isoform 1 inhibits breast cancer cell proliferation, delays the progression of mitosis by prolonging metaphase and reduces tumor growth. {ECO:0000269|PubMed:12692079, ECO:0000269|PubMed…	SUBCELLULAR LOCATION: Mitochondrion {ECO:0000269|PubMed:10697957, ECO:0000269|PubMed:12692079, ECO:0000269|PubMed:19794912}. Golgi apparatus {ECO:0000250}. Cell membrane {ECO:0000250}. Nucleus {ECO:0000250}. Note=In neurons, translocates into the nucleus after treatment with angiotensin-II. {ECO:0000250}.; SUBCELLULAR LOCATION: [Isoform 1]: Cytoplasm, cytoskeleton, microtubule organizing center, …	DISEASE: Hepatocellular carcinoma (HCC) [MIM:114550]: A primary malignant neoplasm of epithelial liver cells. The major risk factors for HCC are chronic hepatitis B virus (HBV) infection, chronic hepatitis C virus (HCV) infection, prolonged dietary aflatoxin exposure, alcoholic cirrhosis, and cirrhosis due to other causes. {ECO:0000269|PubMed:16650523}. Note=The gene represented in this entry may…	regulation of macrophage chemotaxis [GO:0010758]	microtubule binding [GO:0008017]	extracellular space [GO:0005615]; Golgi apparatus [GO:0005794]; microtubule [GO:0005874]; microtubule cytoskeleton [GO:0015630]; microtubule organizing center [GO:0005815]; mitochondrion [GO:0005739]; nucleolus [GO:0005730]; nucleus [GO:0005634]; plasma membrane [GO:0005886]; spindle [GO:0005819]	GO:0005615; GO:0005634; GO:0005730; GO:0005739; GO:0005794; GO:0005815; GO:0005819; GO:0005874; GO:0005886; GO:0008017; GO:0010758; GO:0015630		hsa:57509;	19.2224	19.6385	19.6512	19.3775	19.4365	19.5951	19.6438	18.8788	18.908	18.562	19.001	18.8548	18.9206	19.0008
INA_Q16352	-0.460675	-0.76943	-0.65852	-0.555789	-1.37271	-0.99753	-0.962071	0.527547	1.95745	0.776976	1.52479	0.0637922	0.165864	0.760296	INA	Alpha-internexin	Q16352	1.0296	5.33987e-05	0.00727598	0.528203	sp|Q16352|AINX_HUMAN Alpha-internexin OS=Homo sapiens OX=9606 GN=INA PE=1 SV=2	FUNCTION: Class-IV neuronal intermediate filament that is able to self-assemble. It is involved in the morphogenesis of neurons. It may form an independent structural network without the involvement of other neurofilaments or it may cooperate with NEFL to form the filamentous backbone to which NEFM and NEFH attach to form the cross-bridges. May also cooperate with the neuronal intermediate filame…			cell differentiation [GO:0030154]; cellular response to leukemia inhibitory factor [GO:1990830]; neurofilament cytoskeleton organization [GO:0060052]; substantia nigra development [GO:0021762]	structural constituent of cytoskeleton [GO:0005200]; structural constituent of postsynaptic actin cytoskeleton [GO:0098973]; structural constituent of postsynaptic intermediate filament cytoskeleton [GO:0099184]	cytoplasmic ribonucleoprotein granule [GO:0036464]; extracellular space [GO:0005615]; neurofilament [GO:0005883]; postsynapse [GO:0098794]; Schaffer collateral - CA1 synapse [GO:0098685]	GO:0005200; GO:0005615; GO:0005883; GO:0021762; GO:0030154; GO:0036464; GO:0060052; GO:0098685; GO:0098794; GO:0098973; GO:0099184; GO:1990830		hsa:9118;	17.9642	17.8654	17.9009	17.9337	17.6723	17.7924	17.8037	18.2804	18.738	18.3603	18.5996	18.132	18.1647	18.3549
CADM1_Q9BY67	0.0719655	1.23385	0.982839	1.32573	0.811251	0.595811	0.836531	-1.52723	-1.06024	-0.940008	0.28189	-1.19041	-1.01782	-0.404151	CADM1	Cell adhesion molecule 1	Q9BY67	1.02114	5.45107e-05	0.00727598	-0.406498	sp|Q9BY67|CADM1_HUMAN Cell adhesion molecule 1 OS=Homo sapiens OX=9606 GN=CADM1 PE=1 SV=2	FUNCTION: Mediates homophilic cell-cell adhesion in a Ca(2+)-independent manner (PubMed:22438059, PubMed:12050160). Also mediates heterophilic cell-cell adhesion with CADM3 and NECTIN3 in a Ca(2+)-independent manner (By similarity). Interaction with CRTAM promotes natural killer (NK) cell cytotoxicity and interferon-gamma (IFN-gamma) secretion by CD8+ cells in vitro as well as NK cell-mediated re…	SUBCELLULAR LOCATION: Cell membrane {ECO:0000269|PubMed:11279526, ECO:0000269|PubMed:22438059}; Single-pass type I membrane protein {ECO:0000269|PubMed:11279526}. Cell junction, synapse {ECO:0000250|UniProtKB:Q8R5M8}. Note=Localized to the basolateral plasma membrane of epithelial cells in gall bladder. {ECO:0000250|UniProtKB:Q8R5M8}.		adherens junction organization [GO:0034332]; apoptotic process [GO:0006915]; cell differentiation [GO:0030154]; cell recognition [GO:0008037]; detection of stimulus [GO:0051606]; heterophilic cell-cell adhesion via plasma membrane cell adhesion molecules [GO:0007157]; homophilic cell adhesion via plasma membrane adhesion molecules [GO:0007156]; immune system process [GO:0002376]; multicellular or…	PDZ domain binding [GO:0030165]; protein homodimerization activity [GO:0042803]; signaling receptor binding [GO:0005102]	basolateral plasma membrane [GO:0016323]; cell-cell junction [GO:0005911]; integral component of membrane [GO:0016021]; plasma membrane [GO:0005886]; synapse [GO:0045202]	GO:0001819; GO:0002376; GO:0005102; GO:0005886; GO:0005911; GO:0006915; GO:0007156; GO:0007157; GO:0007275; GO:0007283; GO:0008037; GO:0016021; GO:0016032; GO:0016323; GO:0030154; GO:0030165; GO:0034332; GO:0042271; GO:0042803; GO:0045202; GO:0045954; GO:0051606	R-HSA-418990;R-HSA-420597;	hsa:23705;	19.4519	19.734	19.6731	19.7564	19.6314	19.5791	19.6375	19.0635	19.1769	19.2061	19.5028	19.1453	19.1872	19.3362
AHCYL1_O43865	-0.17249	1.20587	1.45388	-0.372372	0.535568	1.28891	1.54762	-0.987135	-0.701811	-0.645515	-1.16568	-1.13581	-0.539054	-0.311985	AHCYL1	Putative adenosylhomocysteinase 2	O43865	1.02767	5.4589e-05	0.00727598	-0.492771	sp|O43865|SAHH2_HUMAN S-adenosylhomocysteine hydrolase-like protein 1 OS=Homo sapiens OX=9606 GN=AHCYL1 PE=1 SV=2	FUNCTION: Multifaceted cellular regulator which coordinates several essential cellular functions including regulation of epithelial HCO3(-) and fluid secretion, mRNA processing and DNA replication. Regulates ITPR1 sensitivity to inositol 1,4,5-trisphosphate, competing for the common binding site and acting as endogenous 'pseudoligand' whose inhibitory activity can be modulated by its phosphorylat…	SUBCELLULAR LOCATION: Endoplasmic reticulum {ECO:0000269|PubMed:27995898}. Cytoplasm, cytosol {ECO:0000269|PubMed:27995898}. Apical cell membrane {ECO:0000250|UniProtKB:B5DFN2}; Peripheral membrane protein {ECO:0000305}. Microsome {ECO:0000250|UniProtKB:Q80SW1}. Note=Associates with membranes when phosphorylated, probably through interaction with ITPR1 (By similarity). Localizes to mitochondria-a…		angiotensin-activated signaling pathway [GO:0038166]; apoptotic process [GO:0006915]; epithelial fluid transport [GO:0042045]; mitochondrion-endoplasmic reticulum membrane tethering [GO:1990456]; mRNA polyadenylation [GO:0006378]; one-carbon metabolic process [GO:0006730]; positive regulation of sodium ion transport [GO:0010765]; protein export from nucleus [GO:0006611]; regulation of anion trans…	identical protein binding [GO:0042802]; RNA binding [GO:0003723]	apical plasma membrane [GO:0016324]; cytoplasm [GO:0005737]; cytosol [GO:0005829]; endoplasmic reticulum membrane [GO:0005789]; extracellular exosome [GO:0070062]; mitochondria-associated endoplasmic reticulum membrane [GO:0044233]	GO:0003723; GO:0005737; GO:0005789; GO:0005829; GO:0006378; GO:0006611; GO:0006730; GO:0006915; GO:0010765; GO:0016324; GO:0031440; GO:0032412; GO:0033353; GO:0038166; GO:0042045; GO:0042802; GO:0044070; GO:0044233; GO:0051592; GO:0070062; GO:1903779; GO:1990456	R-HSA-112043;R-HSA-1489509;R-HSA-2029485;R-HSA-2871809;R-HSA-422356;R-HSA-5218921;R-HSA-5578775;R-HSA-5607763;R-HSA-9664323;R-HSA-983695;	hsa:10768;	18.0037	18.4369	18.5149	17.9408	18.2262	18.463	18.5443	17.7476	17.8373	17.855	17.6915	17.7009	17.8884	17.9598
LAMB1_P07942	-0.32024	1.30222	1.14703	0.157436	0.730762	1.4766	1.35347	-0.982827	-0.643594	-0.837907	-0.464793	-1.30294	-0.892928	-0.722298	LAMB1	Laminin subunit beta-1	P07942	1.0373	5.56425e-05	0.00727598	-0.807097	sp|P07942|LAMB1_HUMAN Laminin subunit beta-1 OS=Homo sapiens OX=9606 GN=LAMB1 PE=1 SV=2	FUNCTION: Binding to cells via a high affinity receptor, laminin is thought to mediate the attachment, migration and organization of cells into tissues during embryonic development by interacting with other extracellular matrix components. Involved in the organization of the laminar architecture of cerebral cortex. It is probably required for the integrity of the basement membrane/glia limitans t…	SUBCELLULAR LOCATION: Secreted, extracellular space, extracellular matrix, basement membrane. Note=Major component.	DISEASE: Lissencephaly 5 (LIS5) [MIM:615191]: An autosomal recessive brain malformation characterized by cobblestone changes in the cortex, more severe in the posterior region, and subcortical band heterotopia. Affected individuals have hydrocephalus, seizures, and severely delayed psychomotor development. {ECO:0000269|PubMed:23472759}. Note=The disease is caused by variants affecting the gene re…	animal organ morphogenesis [GO:0009887]; basement membrane assembly [GO:0070831]; cell adhesion [GO:0007155]; cell migration [GO:0016477]; cellular protein metabolic process [GO:0044267]; endodermal cell differentiation [GO:0035987]; extracellular matrix organization [GO:0030198]; neuronal-glial interaction involved in cerebral cortex radial glia guided migration [GO:0021812]; neuron projection d…	extracellular matrix structural constituent [GO:0005201]; integrin binding [GO:0005178]; structural molecule activity [GO:0005198]	basement membrane [GO:0005604]; collagen-containing extracellular matrix [GO:0062023]; endoplasmic reticulum lumen [GO:0005788]; extracellular exosome [GO:0070062]; extracellular region [GO:0005576]; extracellular space [GO:0005615]; laminin-10 complex [GO:0043259]; laminin-1 complex [GO:0005606]; laminin-2 complex [GO:0005607]; laminin-8 complex [GO:0043257]; laminin complex [GO:0043256]; perinu…	GO:0005178; GO:0005198; GO:0005201; GO:0005576; GO:0005604; GO:0005606; GO:0005607; GO:0005615; GO:0005788; GO:0007155; GO:0009887; GO:0009888; GO:0016477; GO:0021812; GO:0030198; GO:0030335; GO:0031175; GO:0034446; GO:0035987; GO:0042476; GO:0043256; GO:0043257; GO:0043259; GO:0043687; GO:0044267; GO:0048471; GO:0050679; GO:0062023; GO:0070062; GO:0070831	R-HSA-1474228;R-HSA-3000157;R-HSA-3000171;R-HSA-3000178;R-HSA-373760;R-HSA-381426;R-HSA-8874081;R-HSA-8957275;R-HSA-9619665;	hsa:3912;	21.888	22.6718	22.5968	22.1188	22.3957	22.7561	22.6966	21.5679	21.7318	21.6379	21.8182	21.4133	21.6113	21.6938
THEM6_Q8WUY1	0.190982	1.17826	0.820034	0.941819	1.14456	0.676286	1.32064	-1.42885	-0.731464	-0.336662	-0.779201	-1.37131	-0.868058	-0.757047	THEM6	Protein THEM6	Q8WUY1	1.02404	5.66494e-05	0.00727598	-0.390974	sp|Q8WUY1|THEM6_HUMAN Protein THEM6 OS=Homo sapiens OX=9606 GN=THEM6 PE=1 SV=2		SUBCELLULAR LOCATION: Secreted {ECO:0000305}.				extracellular region [GO:0005576]	GO:0005576		hsa:51337;	16.5029	16.7183	16.6401	16.6667	16.7109	16.6088	16.7493	16.1495	16.3017	16.3878	16.2912	16.1621	16.2719	16.2961
POF1B_Q8WVV4	-0.315281	0.239029	1.31221	1.36819	1.67804	0.488285	0.760682	-0.723159	-1.16218	-0.240083	-0.113202	-0.92739	-1.09414	-1.271	POF1B	Protein POF1B	Q8WVV4	1.04588	5.66911e-05	0.00727598	-0.748431	sp|Q8WVV4|POF1B_HUMAN Protein POF1B OS=Homo sapiens OX=9606 GN=POF1B PE=1 SV=3	FUNCTION: Plays a key role in the organization of epithelial monolayers by regulating the actin cytoskeleton. May be involved in ovary development. {ECO:0000269|PubMed:16773570, ECO:0000269|PubMed:21940798}.	SUBCELLULAR LOCATION: Cell junction, tight junction {ECO:0000269|PubMed:21940798}.	DISEASE: Premature ovarian failure 2B (POF2B) [MIM:300604]: An ovarian disorder defined as the cessation of ovarian function under the age of 40 years. It is characterized by oligomenorrhea or amenorrhea, in the presence of elevated levels of serum gonadotropins and low estradiol. {ECO:0000269|PubMed:16773570, ECO:0000269|PubMed:21940798}. Note=The disease is caused by variants affecting the gene…	actin cytoskeleton organization [GO:0030036]; actin filament organization [GO:0007015]; bicellular tight junction assembly [GO:0070830]; epithelial cell morphogenesis [GO:0003382]	actin filament binding [GO:0051015]	actin filament [GO:0005884]; adherens junction [GO:0005912]; bicellular tight junction [GO:0005923]; desmosome [GO:0030057]	GO:0003382; GO:0005884; GO:0005912; GO:0005923; GO:0007015; GO:0030036; GO:0030057; GO:0051015; GO:0070830		hsa:79983;	16.5387	16.8012	17.3095	17.336	17.4827	16.9193	17.0483	16.3456	16.1376	16.5743	16.6344	16.2488	16.1699	16.0861
SLC27A3_Q5K4L6	0.386743	2	0.968747	-0.273874	0.575901	0.526449	0.305545	-0.863005	0.0136653	-0.279237	-1.13315	-0.928118	-1.03487	-0.804223	SLC27A3	Long-chain fatty acid transport protein 3	Q5K4L6	1.03991	5.97316e-05	0.00750677	-0.53654	sp|Q5K4L6|S27A3_HUMAN Solute carrier family 27 member 3 OS=Homo sapiens OX=9606 GN=SLC27A3 PE=2 SV=4	FUNCTION: Has acyl-CoA ligase activity for long-chain and very-long-chain fatty acids (PubMed:23936004). Does not exhibit fatty acid transport activity (By similarity). {ECO:0000250|UniProtKB:O88561, ECO:0000269|PubMed:23936004}.	SUBCELLULAR LOCATION: Mitochondrion membrane {ECO:0000269|PubMed:23936004}; Single-pass membrane protein {ECO:0000255}.		fatty acid transport [GO:0015908]; long-chain fatty acid metabolic process [GO:0001676]	arachidonate-CoA ligase activity [GO:0047676]; ATP binding [GO:0005524]; long-chain fatty acid-CoA ligase activity [GO:0004467]; long-chain fatty acid transporter activity [GO:0005324]; very long-chain fatty acid-CoA ligase activity [GO:0031957]	endoplasmic reticulum [GO:0005783]; integral component of membrane [GO:0016021]; membrane [GO:0016020]; mitochondrial membrane [GO:0031966]; mitochondrion [GO:0005739]	GO:0001676; GO:0004467; GO:0005324; GO:0005524; GO:0005739; GO:0005783; GO:0015908; GO:0016020; GO:0016021; GO:0031957; GO:0031966; GO:0047676	R-HSA-75876;	hsa:11000;	13.8568	14.6606	14.0741	13.6101	13.9274	13.9089	13.8265	13.3901	13.7175	13.6081	13.2892	13.3658	13.3259	13.412
LGALS8_O00214	-0.0522347	1.20993	0.101513	1.4028	1.203	0.0576639	1.08617	-0.911854	-0.118677	-1.75133	0.258252	-0.854365	-1.4809	-0.149959	LGALS8	Galectin-8	O00214	1.02689	6.08648e-05	0.00750677	-0.420469	sp|O00214|LEG8_HUMAN Galectin-8 OS=Homo sapiens OX=9606 GN=LGALS8 PE=1 SV=4	FUNCTION: Beta-galactoside-binding lectin that acts as a sensor of membrane damage caused by infection and restricts the proliferation of infecting pathogens by targeting them for autophagy (PubMed:22246324, PubMed:28077878). Detects membrane rupture by binding beta-galactoside ligands located on the lumenal side of the endosome membrane; these ligands becoming exposed to the cytoplasm following …	SUBCELLULAR LOCATION: Cytoplasmic vesicle {ECO:0000269|PubMed:22246324}. Cytoplasm, cytosol {ECO:0000269|PubMed:22246324}.		cellular response to virus [GO:0098586]; lymphatic endothelial cell migration [GO:1904977]; xenophagy [GO:0098792]	carbohydrate binding [GO:0030246]; integrin binding [GO:0005178]	cytoplasm [GO:0005737]; cytoplasmic vesicle [GO:0031410]; cytosol [GO:0005829]; extracellular space [GO:0005615]; membrane [GO:0016020]	GO:0005178; GO:0005615; GO:0005737; GO:0005829; GO:0016020; GO:0030246; GO:0031410; GO:0098586; GO:0098792; GO:1904977		hsa:3964;	15.8336	16.2044	15.8788	16.2611	16.2024	15.8659	16.1681	15.581	15.8141	15.3344	15.9248	15.5979	15.4138	15.8049
THY1_P04216	0.222945	1.36683	2	0.587335	0.913441	-0.556912	-0.183861	-1.09031	0.177443	0.159487	-0.437923	-0.702004	-0.958541	-1.5633	THY1	Thy-1 membrane glycoprotein	P04216	1.0416	6.1377e-05	0.00750677	-0.54277	sp|P04216|THY1_HUMAN Thy-1 membrane glycoprotein OS=Homo sapiens OX=9606 GN=THY1 PE=1 SV=2	FUNCTION: May play a role in cell-cell or cell-ligand interactions during synaptogenesis and other events in the brain.	SUBCELLULAR LOCATION: Cell membrane {ECO:0000250}; Lipid-anchor, GPI-anchor {ECO:0000250}.		angiogenesis [GO:0001525]; cell-cell adhesion [GO:0098609]; cell-cell signaling [GO:0007267]; cytoskeleton organization [GO:0007010]; focal adhesion assembly [GO:0048041]; integrin-mediated signaling pathway [GO:0007229]; negative regulation of axonogenesis [GO:0050771]; negative regulation of cell migration [GO:0030336]; negative regulation of neuron projection regeneration [GO:0070571]; negativ…	GPI anchor binding [GO:0034235]; GTPase activator activity [GO:0005096]; integrin binding [GO:0005178]; protein kinase binding [GO:0019901]	anchored component of external side of plasma membrane [GO:0031362]; apical plasma membrane [GO:0016324]; axolemma [GO:0030673]; cell surface [GO:0009986]; dendrite [GO:0030425]; dendrite membrane [GO:0032590]; endoplasmic reticulum [GO:0005783]; external side of plasma membrane [GO:0009897]; extracellular exosome [GO:0070062]; extracellular region [GO:0005576]; focal adhesion [GO:0005925]; growt…	GO:0001525; GO:0001952; GO:0002693; GO:0005096; GO:0005178; GO:0005576; GO:0005783; GO:0005886; GO:0005887; GO:0005925; GO:0006469; GO:0007010; GO:0007229; GO:0007267; GO:0009897; GO:0009986; GO:0016324; GO:0019901; GO:0030336; GO:0030425; GO:0030426; GO:0030673; GO:0031362; GO:0032590; GO:0032809; GO:0034116; GO:0034235; GO:0043113; GO:0043547; GO:0045121; GO:0046549; GO:0048041; GO:0050771; GO:…	R-HSA-163125;	hsa:7070;	13.4137	13.9058	14.2064	13.5704	13.7108	13.0781	13.2386	12.8486	13.3941	13.3863	13.1293	13.0157	12.9053	12.6451
KLHL21_Q9UJP4	-0.469661	-1.3006	-0.758817	-0.492047	-0.844827	-0.712463	-1.46923	0.525241	0.980139	1.90894	0.904347	0.676776	0.82605	0.22616	KLHL21	Kelch-like protein 21	Q9UJP4	1.02882	6.23247e-05	0.00750677	0.455287	sp|Q9UJP4|KLH21_HUMAN Kelch-like protein 21 OS=Homo sapiens OX=9606 GN=KLHL21 PE=1 SV=4	FUNCTION: Substrate-specific adapter of a BCR (BTB-CUL3-RBX1) E3 ubiquitin-protein ligase complex required for efficient chromosome alignment and cytokinesis. The BCR(KLHL21) E3 ubiquitin ligase complex regulates localization of the chromosomal passenger complex (CPC) from chromosomes to the spindle midzone in anaphase and mediates the ubiquitination of AURKB. Ubiquitination of AURKB by BCR(KLHL2…	SUBCELLULAR LOCATION: Cytoplasm, cytoskeleton, spindle {ECO:0000269|PubMed:19995937}. Note=Localizes to the spindle midzone and targets CUL3 to this region.		cell cycle [GO:0007049]; cell division [GO:0051301]; chromosome passenger complex localization to spindle midzone [GO:0035853]; post-translational protein modification [GO:0043687]; protein ubiquitination [GO:0016567]; regulation of cytokinesis [GO:0032465]	cullin family protein binding [GO:0097602]	Cul3-RING ubiquitin ligase complex [GO:0031463]; cytosol [GO:0005829]; polar microtubule [GO:0005827]	GO:0005827; GO:0005829; GO:0007049; GO:0016567; GO:0031463; GO:0032465; GO:0035853; GO:0043687; GO:0051301; GO:0097602	R-HSA-8951664;R-HSA-983168;	hsa:9903;	15.8995	15.6805	15.8233	15.8936	15.8006	15.8355	15.6361	16.1616	16.2815	16.5262	16.2615	16.2015	16.2409	16.0828
RANBP6_O60518	-0.640917	-1.23472	-0.4898	-0.934164	-1.68678	-0.87495	-0.478155	0.884418	0.920038	0.619083	1.23153	0.732971	1.24292	0.708525	RANBP6	Ran-binding protein 6	O60518	1.02557	7.02886e-05	0.00833772	0.409153	sp|O60518|RNBP6_HUMAN Ran-binding protein 6 OS=Homo sapiens OX=9606 GN=RANBP6 PE=1 SV=2	FUNCTION: May function in nuclear protein import as nuclear transport receptor.	SUBCELLULAR LOCATION: Cytoplasm {ECO:0000250}. Nucleus {ECO:0000250}.		protein import into nucleus [GO:0006606]	nuclear import signal receptor activity [GO:0061608]; nuclear localization sequence binding [GO:0008139]	cytoplasm [GO:0005737]; nucleus [GO:0005634]	GO:0005634; GO:0005737; GO:0006606; GO:0008139; GO:0061608		hsa:26953;	16.0642	15.93	16.0983	15.9979	15.8279	16.0113	16.1009	16.4087	16.4168	16.3488	16.4871	16.3745	16.4897	16.369
BMP10_O95393	-0.471581	0.174784	1.50924	-0.504406	-0.601772	1.44897	1.72515	-1.1975	-0.718109	-0.0130324	-1.2307	-0.941454	0.198419	0.62198	BMP10	Bone morphogenetic protein 10	O95393	1.0406	7.16322e-05	0.00837027	-0.632036	sp|O95393|BMP10_HUMAN Bone morphogenetic protein 10 OS=Homo sapiens OX=9606 GN=BMP10 PE=1 SV=1	FUNCTION: Required for maintaining the proliferative activity of embryonic cardiomyocytes by preventing premature activation of the negative cell cycle regulator CDKN1C/p57KIP and maintaining the required expression levels of cardiogenic factors such as MEF2C and NKX2-5. Acts as a ligand for ACVRL1/ALK1, BMPR1A/ALK3 and BMPR1B/ALK6, leading to activation of SMAD1, SMAD5 and SMAD8 transcription fa…	SUBCELLULAR LOCATION: Secreted {ECO:0000250}.		activin receptor signaling pathway [GO:0032924]; adult heart development [GO:0007512]; atrial cardiac muscle tissue morphogenesis [GO:0055009]; BMP signaling pathway [GO:0030509]; cardiac muscle cell proliferation [GO:0060038]; cell adhesion [GO:0007155]; heart trabecula formation [GO:0060347]; kidney development [GO:0001822]; negative regulation of cardiac muscle hypertrophy [GO:0010614]; negati…	cytokine activity [GO:0005125]; growth factor activity [GO:0008083]; hormone activity [GO:0005179]; receptor serine/threonine kinase binding [GO:0033612]; telethonin binding [GO:0031433]	cell surface [GO:0009986]; cytoplasm [GO:0005737]; extracellular region [GO:0005576]; extracellular space [GO:0005615]; Z disc [GO:0030018]	GO:0001822; GO:0005125; GO:0005179; GO:0005576; GO:0005615; GO:0005737; GO:0007155; GO:0007512; GO:0008083; GO:0009986; GO:0010596; GO:0010613; GO:0010614; GO:0010628; GO:0010862; GO:0030018; GO:0030308; GO:0030336; GO:0030509; GO:0031433; GO:0032924; GO:0033612; GO:0045214; GO:0045893; GO:0055009; GO:0055010; GO:0055015; GO:0055117; GO:0060038; GO:0060045; GO:0060298; GO:0060347; GO:0060389; GO:…	R-HSA-201451;R-HSA-2129379;	hsa:27302;	15.5669	16.0028	16.9026	15.5448	15.4791	16.862	17.0483	15.0774	15.4006	15.8761	15.055	15.25	16.0187	16.3043
ADD2_P35612	-0.0253928	0.964163	1.38551	1.5355	1.49567	-0.206099	0.25336	-0.84148	-1.12856	-0.169741	-0.0653858	-1.04518	-0.964199	-1.18816	ADD2	Beta-adducin	P35612	1.03264	7.34958e-05	0.00837982	-0.614872	sp|P35612|ADDB_HUMAN Beta-adducin OS=Homo sapiens OX=9606 GN=ADD2 PE=1 SV=3	FUNCTION: Membrane-cytoskeleton-associated protein that promotes the assembly of the spectrin-actin network. Binds to the erythrocyte membrane receptor SLC2A1/GLUT1 and may therefore provide a link between the spectrin cytoskeleton to the plasma membrane. Binds to calmodulin. Calmodulin binds preferentially to the beta subunit. {ECO:0000269|PubMed:18347014}.	SUBCELLULAR LOCATION: Cytoplasm, cytoskeleton. Cell membrane; Peripheral membrane protein; Cytoplasmic side.		actin cytoskeleton organization [GO:0030036]; actin filament bundle assembly [GO:0051017]; barbed-end actin filament capping [GO:0051016]; hemopoiesis [GO:0030097]; leukocyte migration [GO:0050900]; leukocyte tethering or rolling [GO:0050901]; positive regulation of protein binding [GO:0032092]; protein-containing complex assembly [GO:0065003]; synapse assembly [GO:0007416]; transmembrane transpo…	actin binding [GO:0003779]; actin filament binding [GO:0051015]; calmodulin binding [GO:0005516]; protein heterodimerization activity [GO:0046982]; protein homodimerization activity [GO:0042803]; protein kinase binding [GO:0019901]; spectrin binding [GO:0030507]; structural constituent of cytoskeleton [GO:0005200]	cytoplasmic vesicle [GO:0031410]; cytoskeleton [GO:0005856]; cytosol [GO:0005829]; F-actin capping protein complex [GO:0008290]; plasma membrane [GO:0005886]; plasma membrane raft [GO:0044853]; postsynaptic density [GO:0014069]	GO:0003779; GO:0005200; GO:0005516; GO:0005829; GO:0005856; GO:0005886; GO:0007416; GO:0008290; GO:0014069; GO:0019901; GO:0030036; GO:0030097; GO:0030507; GO:0031410; GO:0032092; GO:0042803; GO:0044853; GO:0046982; GO:0050900; GO:0050901; GO:0051015; GO:0051016; GO:0051017; GO:0055085; GO:0065003	R-HSA-5223345;	hsa:119;	19.1339	19.5281	19.6959	19.7556	19.7398	19.0619	19.2449	18.8088	18.6945	19.0764	19.118	18.7277	18.7599	18.6707
VAMP8_Q9BV40	-0.124321	1.49565	1.72761	-0.595356	-0.0518299	1.19009	1.25581	-1.01219	-0.418359	-0.132061	-1.34244	-0.755911	-0.787481	-0.449202	VAMP8	Vesicle-associated membrane protein 8	Q9BV40	1.0409	7.38546e-05	0.00837982	-0.636779	sp|Q9BV40|VAMP8_HUMAN Vesicle-associated membrane protein 8 OS=Homo sapiens OX=9606 GN=VAMP8 PE=1 SV=1	FUNCTION: SNAREs, soluble N-ethylmaleimide-sensitive factor-attachment protein receptors, are essential proteins for fusion of cellular membranes. SNAREs localized on opposing membranes assemble to form a trans-SNARE complex, an extended, parallel four alpha-helical bundle that drives membrane fusion. VAMP8 is a SNARE involved in autophagy through the direct control of autophagosome membrane fusi…	SUBCELLULAR LOCATION: Lysosome membrane {ECO:0000269|PubMed:25686604}; Single-pass type IV membrane protein {ECO:0000305}. Early endosome membrane {ECO:0000269|PubMed:25648148, ECO:0000269|PubMed:9614193}; Single-pass type IV membrane protein {ECO:0000305}. Late endosome membrane {ECO:0000269|PubMed:25648148}; Single-pass type IV membrane protein {ECO:0000305}. Cell membrane {ECO:0000250|UniProtK…		antigen processing and presentation of exogenous peptide antigen via MHC class I, TAP-dependent [GO:0002479]; autophagosome maturation [GO:0097352]; autophagosome membrane docking [GO:0016240]; defense response to virus [GO:0051607]; membrane organization [GO:0061024]; mucus secretion [GO:0070254]; negative regulation of secretion by cell [GO:1903531]; neutrophil degranulation [GO:0043312]; posit…	chloride channel inhibitor activity [GO:0019869]; SNAP receptor activity [GO:0005484]; syntaxin binding [GO:0019905]	azurophil granule membrane [GO:0035577]; clathrin-coated endocytic vesicle membrane [GO:0030669]; cytoplasm [GO:0005737]; cytosol [GO:0005829]; early endosome [GO:0005769]; early endosome membrane [GO:0031901]; extracellular exosome [GO:0070062]; integral component of membrane [GO:0016021]; late endosome membrane [GO:0031902]; lysosomal membrane [GO:0005765]; membrane [GO:0016020]; mucin granule …	GO:0002479; GO:0005484; GO:0005737; GO:0005765; GO:0005769; GO:0005829; GO:0005886; GO:0006892; GO:0006906; GO:0015031; GO:0016020; GO:0016021; GO:0016240; GO:0019869; GO:0019905; GO:0030667; GO:0030669; GO:0030670; GO:0031201; GO:0031901; GO:0031902; GO:0031982; GO:0035493; GO:0035577; GO:0035579; GO:0043312; GO:0046718; GO:0048471; GO:0051607; GO:0055037; GO:0055038; GO:0061024; GO:0070062; GO:…	R-HSA-1236974;R-HSA-199992;R-HSA-432720;R-HSA-432722;R-HSA-6798695;R-HSA-8856825;R-HSA-8856828;	hsa:8673;	15.8327	16.5699	16.6755	15.6184	15.8657	16.4309	16.4608	15.4287	15.6989	15.8292	15.2784	15.5453	15.5309	15.6849
HTATIP2_Q9BUP3	-0.190713	-0.0394351	1.6842	-0.351445	0.178387	1.29961	1.84703	-1.01419	-1.03388	-0.118943	-1.0616	-1.22891	-0.230427	0.260322	HTATIP2	Oxidoreductase HTATIP2	Q9BUP3	1.02523	7.72499e-05	0.00843322	-0.438625	sp|Q9BUP3|HTAI2_HUMAN Oxidoreductase HTATIP2 OS=Homo sapiens OX=9606 GN=HTATIP2 PE=1 SV=2	FUNCTION: Oxidoreductase required for tumor suppression. NAPDH-bound form inhibits nuclear import by competing with nuclear import substrates for binding to a subset of nuclear transport receptors. May act as a redox sensor linked to transcription through regulation of nuclear import. Isoform 1 is a metastasis suppressor with proapoptotic as well as antiangiogenic properties. Isoform 2 has an ant…	SUBCELLULAR LOCATION: Cytoplasm {ECO:0000269|PubMed:15282309}. Nucleus envelope {ECO:0000269|PubMed:15282309}.		angiogenesis [GO:0001525]; apoptotic process [GO:0006915]; cell differentiation [GO:0030154]; import into nucleus [GO:0051170]; negative regulation of apoptotic process [GO:0043066]; positive regulation of programmed cell death [GO:0043068]; positive regulation of transcription by RNA polymerase II [GO:0045944]; protein autophosphorylation [GO:0046777]; regulation of angiogenesis [GO:0045765]; re…	oxidoreductase activity [GO:0016491]; protein serine/threonine kinase activity [GO:0004674]; transcription coactivator activity [GO:0003713]	cytoplasm [GO:0005737]; cytosol [GO:0005829]; membrane [GO:0016020]; nuclear envelope [GO:0005635]; nucleus [GO:0005634]	GO:0001525; GO:0003713; GO:0004674; GO:0005634; GO:0005635; GO:0005737; GO:0005829; GO:0006357; GO:0006915; GO:0016020; GO:0016032; GO:0016491; GO:0030154; GO:0043066; GO:0043068; GO:0045765; GO:0045944; GO:0046777; GO:0051170		hsa:10553;	17.5413	17.5938	18.1914	17.4856	17.6693	18.0581	18.2479	17.2558	17.249	17.5662	17.2394	17.1813	17.5276	17.6977
LAMC3_Q9Y6N6	0.389036	1.65859	0.373969	-0.0688185	0.548754	0.937508	1.661	-0.617142	-0.395961	-0.0687754	-1.38035	-0.994869	-1.51638	-0.526566	LAMC3	Laminin subunit gamma-3	Q9Y6N6	1.05852	7.74771e-05	0.00843322	-0.840346	sp|Q9Y6N6|LAMC3_HUMAN Laminin subunit gamma-3 OS=Homo sapiens OX=9606 GN=LAMC3 PE=1 SV=3	FUNCTION: Binding to cells via a high affinity receptor, laminin is thought to mediate the attachment, migration and organization of cells into tissues during embryonic development by interacting with other extracellular matrix components.	SUBCELLULAR LOCATION: Secreted, extracellular space, extracellular matrix, basement membrane.	DISEASE: Cortical malformations occipital (OCCM) [MIM:614115]: A disease in which affected individuals develop seizures, sometimes associated with transient visual changes. Brain MRI shows both pachygyria and polymicrogyria restricted to the lateral occipital lobes. {ECO:0000269|PubMed:21572413}. Note=The disease is caused by variants affecting the gene represented in this entry.	animal organ morphogenesis [GO:0009887]; astrocyte development [GO:0014002]; cell migration [GO:0016477]; extracellular matrix organization [GO:0030198]; retina development in camera-type eye [GO:0060041]; substrate adhesion-dependent cell spreading [GO:0034446]; tissue development [GO:0009888]; visual perception [GO:0007601]	structural molecule activity [GO:0005198]	basement membrane [GO:0005604]; extracellular matrix [GO:0031012]; extracellular region [GO:0005576]; membrane [GO:0016020]	GO:0005198; GO:0005576; GO:0005604; GO:0007601; GO:0009887; GO:0009888; GO:0014002; GO:0016020; GO:0016477; GO:0030198; GO:0031012; GO:0034446; GO:0060041	R-HSA-3000157;R-HSA-3000171;R-HSA-8874081;	hsa:10319;	14.9881	15.667	14.9801	14.7433	15.0735	15.2814	15.6683	14.4501	14.5683	14.7433	14.0419	14.2481	13.9692	14.4985
VAT1L_Q9HCJ6	-0.216624	-1.1775	-0.660385	-1.467	-1.90532	0.171046	0.383023	1.20365	0.775838	0.132498	0.083135	0.244249	1.41244	1.02096	VAT1L	Synaptic vesicle membrane protein VAT-1 homolog-like	Q9HCJ6	1.03217	7.89737e-05	0.00843322	0.552809	sp|Q9HCJ6|VAT1L_HUMAN Synaptic vesicle membrane protein VAT-1 homolog-like OS=Homo sapiens OX=9606 GN=VAT1L PE=1 SV=2					oxidoreductase activity [GO:0016491]; zinc ion binding [GO:0008270]		GO:0008270; GO:0016491		hsa:57687;	17.3735	16.9919	17.1972	16.877	16.7029	17.5274	17.6116	17.9374	17.7675	17.5121	17.4925	17.5565	18.0203	17.8649
RILPL1_Q5EBL4	-0.266656	-1.2618	-1.53207	-0.298757	-0.649771	-1.1802	-0.886536	1.14095	0.400063	0.66584	0.628692	1.33024	1.40513	0.504876	RILPL1	RILP-like protein 1	Q5EBL4	1.02536	7.92131e-05	0.00843322	0.425964	sp|Q5EBL4|RIPL1_HUMAN RILP-like protein 1 OS=Homo sapiens OX=9606 GN=RILPL1 PE=1 SV=1	FUNCTION: Plays a role in the regulation of cell shape and polarity (By similarity). Plays a role in cellular protein transport, including protein transport away from primary cilia (By similarity). Neuroprotective protein, which acts by sequestring GAPDH in the cytosol and prevent the apoptotic function of GAPDH in the nucleus (By similarity). Competes with SIAH1 for binding GAPDH (By similarity)…	SUBCELLULAR LOCATION: Cytoplasm, cytosol {ECO:0000269|PubMed:14668488, ECO:0000269|PubMed:30398148}. Cytoplasm, cytoskeleton, microtubule organizing center, centrosome, centriole {ECO:0000269|PubMed:30398148}. Cytoplasm, cytoskeleton, cilium basal body {ECO:0000269|PubMed:30398148}.		cilium assembly [GO:0060271]; epithelial cell morphogenesis [GO:0003382]; protein transport from ciliary membrane to plasma membrane [GO:1903445]; regulation of neuron death [GO:1901214]	protein dimerization activity [GO:0046983]	centriole [GO:0005814]; centrosome [GO:0005813]; ciliary basal body [GO:0036064]; cilium [GO:0005929]; cytoplasm [GO:0005737]; cytosol [GO:0005829]; nucleoplasm [GO:0005654]; plasma membrane [GO:0005886]	GO:0003382; GO:0005654; GO:0005737; GO:0005813; GO:0005814; GO:0005829; GO:0005886; GO:0005929; GO:0036064; GO:0046983; GO:0060271; GO:1901214; GO:1903445		hsa:353116;	16.947	16.7028	16.6365	16.9391	16.853	16.7228	16.7949	17.2924	17.1106	17.1758	17.1667	17.3388	17.3572	17.1363
RECK_O95980	0.109976	1.75518	1.7637	-0.195316	0.468701	0.11088	0.692568	-0.991562	0.24169	0.157584	-0.367052	-1.11011	-1.58125	-1.05499	RECK	Reversion-inducing cysteine-rich protein with Kazal motifs	O95980	1.03704	7.97111e-05	0.00843322	-0.595501	sp|O95980|RECK_HUMAN Reversion-inducing cysteine-rich protein with Kazal motifs OS=Homo sapiens OX=9606 GN=RECK PE=1 SV=1	FUNCTION: Functions together with ADGRA2 to enable brain endothelial cells to selectively respond to Wnt7 signals (WNT7A or WNT7B) (PubMed:28289266, PubMed:30026314). Plays a key role in Wnt7-specific responses: required for central nervous system (CNS) angiogenesis and blood-brain barrier regulation (By similarity). Acts as a Wnt7-specific coactivator of canonical Wnt signaling by decoding Wnt l…	SUBCELLULAR LOCATION: Cell membrane {ECO:0000269|PubMed:30026314, ECO:0000269|PubMed:9789069}; Lipid-anchor, GPI-anchor {ECO:0000269|PubMed:9789069}.		blood vessel maturation [GO:0001955]; embryo implantation [GO:0007566]; embryonic forelimb morphogenesis [GO:0035115]; extracellular matrix organization [GO:0030198]; negative regulation of cell migration [GO:0030336]; negative regulation of metalloendopeptidase activity [GO:1904684]; positive regulation of canonical Wnt signaling pathway [GO:0090263]; regulation of angiogenesis [GO:0045765]; reg…	coreceptor activity involved in canonical Wnt signaling pathway [GO:1904928]; endopeptidase inhibitor activity [GO:0004866]; metalloendopeptidase inhibitor activity [GO:0008191]; serine-type endopeptidase inhibitor activity [GO:0004867]; Wnt-protein binding [GO:0017147]	anchored component of membrane [GO:0031225]; extracellular region [GO:0005576]; membrane [GO:0016020]; plasma membrane [GO:0005886]; Wnt signalosome [GO:1990909]	GO:0001955; GO:0002040; GO:0004866; GO:0004867; GO:0005576; GO:0005886; GO:0007566; GO:0008191; GO:0016020; GO:0017147; GO:0030198; GO:0030336; GO:0031225; GO:0035115; GO:0045765; GO:0090210; GO:0090263; GO:1904684; GO:1904928; GO:1990909	R-HSA-163125;	hsa:8434;	16.4243	17.153	17.1568	16.2891	16.5832	16.4247	16.6824	15.9364	16.4827	16.4454	16.213	15.8839	15.6752	15.9083
PPAP2B_O14495	0.429466	0.871373	0.493799	1.60587	1.21675	0.184298	0.56766	-1.32493	-1.29402	-1.00633	0.822778	-1.07535	-0.679154	-0.812201	PPAP2B	Lipid phosphate phosphohydrolase 3	O14495	1.03098	8.25618e-05	0.00861835	-0.502874	sp|O14495|PLPP3_HUMAN Phospholipid phosphatase 3 OS=Homo sapiens OX=9606 GN=PLPP3 PE=1 SV=1	FUNCTION: Magnesium-independent phospholipid phosphatase of the plasma membrane that catalyzes the dephosphorylation of a variety of glycerolipid and sphingolipid phosphate esters including phosphatidate/PA, lysophosphatidate/LPA, diacylglycerol pyrophosphate/DGPP, sphingosine 1-phosphate/S1P and ceramide 1-phosphate/C1P (PubMed:9705349, PubMed:9607309, PubMed:27694435). Also acts on N-oleoyl eth…	SUBCELLULAR LOCATION: Cell membrane {ECO:0000269|PubMed:12660161, ECO:0000269|PubMed:20123964, ECO:0000269|PubMed:9705349}; Multi-pass membrane protein {ECO:0000250|UniProtKB:P97544}. Basolateral cell membrane {ECO:0000269|PubMed:14527693}; Multi-pass membrane protein {ECO:0000250|UniProtKB:P97544}. Endoplasmic reticulum membrane {ECO:0000269|PubMed:23591818}; Multi-pass membrane protein {ECO:000…		canonical Wnt signaling pathway [GO:0060070]; canonical Wnt signaling pathway involved in positive regulation of cell-cell adhesion [GO:0044329]; canonical Wnt signaling pathway involved in positive regulation of endothelial cell migration [GO:0044328]; canonical Wnt signaling pathway involved in positive regulation of wound healing [GO:0044330]; cell-cell adhesion mediated by integrin [GO:003363…	ceramide-1-phosphate phosphatase activity [GO:0106235]; integrin binding [GO:0005178]; lipid phosphatase activity [GO:0042577]; phosphatidate phosphatase activity [GO:0008195]; sphingosine-1-phosphate phosphatase activity [GO:0042392]	adherens junction [GO:0005912]; basolateral plasma membrane [GO:0016323]; endoplasmic reticulum exit site [GO:0070971]; endoplasmic reticulum-Golgi intermediate compartment membrane [GO:0033116]; endoplasmic reticulum membrane [GO:0005789]; Golgi apparatus [GO:0005794]; Golgi membrane [GO:0000139]; integral component of membrane [GO:0016021]; integral component of plasma membrane [GO:0005887]; me…	GO:0000139; GO:0001933; GO:0005178; GO:0005789; GO:0005794; GO:0005802; GO:0005886; GO:0005887; GO:0005912; GO:0006644; GO:0006670; GO:0006672; GO:0006890; GO:0007165; GO:0007229; GO:0008195; GO:0016020; GO:0016021; GO:0016323; GO:0030111; GO:0030148; GO:0033116; GO:0033631; GO:0034109; GO:0042392; GO:0042577; GO:0044328; GO:0044329; GO:0044330; GO:0045121; GO:0046839; GO:0050821; GO:0051091; GO:…	R-HSA-1660661;	hsa:8613;	16.6253	16.7701	16.6464	17.0109	16.8834	16.5449	16.6706	16.0502	16.0603	16.1546	16.7542	16.132	16.2619	16.2183
SLITRK4_Q8IW52	-0.0729538	-0.00100575	-0.468468	-1.10028	-0.964135	-1.06063	-1.47187	1.73111	1.76873	0.198141	1.00094	0.420444	-0.00481692	0.0248063	SLITRK4	SLIT and NTRK-like protein 4	Q8IW52	1.02673	8.38954e-05	0.00864233	0.429919	sp|Q8IW52|SLIK4_HUMAN SLIT and NTRK-like protein 4 OS=Homo sapiens OX=9606 GN=SLITRK4 PE=1 SV=1	FUNCTION: It is involved in synaptogenesis and promotes synapse differentiation (PubMed:27812321). Suppresses neurite outgrowth (By similarity). {ECO:0000250|UniProtKB:Q810B8, ECO:0000269|PubMed:27812321}.	SUBCELLULAR LOCATION: Membrane {ECO:0000305}; Single-pass type I membrane protein {ECO:0000305}. Cell membrane {ECO:0000269|PubMed:27812321}.		axonogenesis [GO:0007409]; regulation of presynapse assembly [GO:1905606]; regulation of synapse organization [GO:0050807]		glutamatergic synapse [GO:0098978]; integral component of membrane [GO:0016021]; plasma membrane [GO:0005886]	GO:0005886; GO:0007409; GO:0016021; GO:0050807; GO:0098978; GO:1905606	R-HSA-388844;	hsa:139065;	16.2798	16.3009	16.164	15.979	16.0189	15.9907	15.8702	16.808	16.819	16.3592	16.5942	16.4243	16.2998	16.3084
CYBRD1_Q53TN4	0.358978	1.23566	1.45403	0.317646	1.23038	1.26169	0.096613	-1.49167	-1.07316	-0.425971	-0.402864	-1.02702	-0.9429	-0.591421	CYBRD1	Cytochrome b reductase 1	Q53TN4	1.03943	8.77739e-05	0.00892444	-0.567439	sp|Q53TN4|CYBR1_HUMAN Cytochrome b reductase 1 OS=Homo sapiens OX=9606 GN=CYBRD1 PE=1 SV=1	FUNCTION: Plasma membrane reductase that uses cytoplasmic ascorbate as an electron donor to reduce extracellular Fe(3+) into Fe(2+) (PubMed:30272000). Probably functions in dietary iron absorption at the brush border of duodenal enterocytes by producing Fe(2+), the divalent form of iron that can be transported into enterocytes (PubMed:30272000). It is also able to reduce extracellular monodehydro…	SUBCELLULAR LOCATION: Cell membrane {ECO:0000269|PubMed:17068337}; Multi-pass membrane protein {ECO:0000269|PubMed:30272000}. Apical cell membrane {ECO:0000305|PubMed:12949720}; Multi-pass membrane protein {ECO:0000269|PubMed:30272000}. Note=Localized at the brush border of duodenal cells. {ECO:0000269|PubMed:12949720}.		ascorbate homeostasis [GO:0140576]; cellular iron ion homeostasis [GO:0006879]; iron ion homeostasis [GO:0055072]; reductive iron assimilation [GO:0033215]; response to iron ion [GO:0010039]	ferric-chelate reductase activity [GO:0000293]; identical protein binding [GO:0042802]; metal ion binding [GO:0046872]; oxidoreductase activity [GO:0016491]; oxidoreductase activity, acting on metal ions [GO:0016722]; transmembrane ascorbate ferrireductase activity [GO:0140571]; transmembrane monodehydroascorbate reductase activity [GO:0140575]	apical plasma membrane [GO:0016324]; brush border membrane [GO:0031526]; extracellular exosome [GO:0070062]; integral component of membrane [GO:0016021]; lysosomal membrane [GO:0005765]; plasma membrane [GO:0005886]	GO:0000293; GO:0005765; GO:0005886; GO:0006879; GO:0010039; GO:0016021; GO:0016324; GO:0016491; GO:0016722; GO:0031526; GO:0033215; GO:0042802; GO:0046872; GO:0055072; GO:0070062; GO:0140571; GO:0140575; GO:0140576	R-HSA-917937;	hsa:79901;	14.7933	15.0857	15.1585	14.7795	15.0839	15.0943	14.7058	14.1761	14.3156	14.5315	14.5392	14.331	14.3591	14.4763
PLCD1_P51178	0.575679	2	1.32887	0.00437305	0.565554	0.402692	0.606239	-0.50569	-0.121298	-0.379989	-0.741248	-1.42357	-1.43652	-0.915048	PLCD1	1-phosphatidylinositol 4,5-bisphosphate phosphodiesterase delta-1	P51178	1.02273	9.63726e-05	0.00937705	-0.406482	sp|P51178|PLCD1_HUMAN 1-phosphatidylinositol 4,5-bisphosphate phosphodiesterase delta-1 OS=Homo sapiens OX=9606 GN=PLCD1 PE=1 SV=2	FUNCTION: The production of the second messenger molecules diacylglycerol (DAG) and inositol 1,4,5-trisphosphate (IP3) is mediated by activated phosphatidylinositol-specific phospholipase C enzymes (PubMed:9188725). Essential for trophoblast and placental development (By similarity). Binds phosphatidylinositol 4,5-bisphosphate (PubMed:7890667, PubMed:9188725). {ECO:0000250|UniProtKB:Q8R3B1, ECO:0…		DISEASE: Nail disorder, non-syndromic congenital, 3 (NDNC3) [MIM:151600]: A nail disorder characterized by a white appearance of the nail plate (true leukonychia), the nail bed (pseudoleukonychia), or neither (apparent leukonychia). Leukonychia may involve all of the nail (leukonychia totalis) or only part of the nail (leukonychia partialis), or can appear as one or more transverse bands (leukony…	inositol phosphate metabolic process [GO:0043647]; lipid catabolic process [GO:0016042]; phosphatidylinositol-mediated signaling [GO:0048015]; phosphatidylinositol metabolic process [GO:0046488]; phospholipid metabolic process [GO:0006644]	calcium ion binding [GO:0005509]; GTPase activating protein binding [GO:0032794]; phosphatidic acid binding [GO:0070300]; phosphatidylinositol-4,5-bisphosphate binding [GO:0005546]; phosphatidylinositol phospholipase C activity [GO:0004435]; phosphatidylserine binding [GO:0001786]	cytoplasm [GO:0005737]; extracellular exosome [GO:0070062]; plasma membrane [GO:0005886]	GO:0001786; GO:0004435; GO:0005509; GO:0005546; GO:0005737; GO:0005886; GO:0006644; GO:0016042; GO:0032794; GO:0043647; GO:0046488; GO:0048015; GO:0070062; GO:0070300	R-HSA-1855204;	hsa:5333;	18.2308	18.608	18.4248	18.0837	18.2282	18.1863	18.2387	17.9523	18.0513	17.9847	17.8916	17.7159	17.7125	17.8468
COL11A2_P13942	0.874913	0.837082	0.487995	0.256605	0.165256	1.19938	1.44437	-0.709921	-0.696976	-2	-0.279438	-1.10111	-0.341014	0.155663	COL11A2	Collagen alpha-2(XI) chain	P13942	1.03744	9.67081e-05	0.00937705	-0.655612	sp|P13942|COBA2_HUMAN Collagen alpha-2(XI) chain OS=Homo sapiens OX=9606 GN=COL11A2 PE=1 SV=5	FUNCTION: May play an important role in fibrillogenesis by controlling lateral growth of collagen II fibrils.	SUBCELLULAR LOCATION: Secreted, extracellular space, extracellular matrix {ECO:0000255|PROSITE-ProRule:PRU00793}.	DISEASE: Otospondylomegaepiphyseal dysplasia, autosomal dominant (OSMEDA) [MIM:184840]: An autosomal dominant form of otospondylomegaepiphyseal dysplasia, a disorder characterized by sensorineural deafness, enlarged epiphyses, mild platyspondyly, and disproportionate shortness of the limbs. Total body length is normal. Typical facial features are mid-face hypoplasia, short upturned nose and depre…	cartilage development [GO:0051216]; collagen fibril organization [GO:0030199]; extracellular matrix organization [GO:0030198]; roof of mouth development [GO:0060021]; sensory perception of sound [GO:0007605]; skeletal system development [GO:0001501]; soft palate development [GO:0060023]	extracellular matrix structural constituent [GO:0005201]; extracellular matrix structural constituent conferring tensile strength [GO:0030020]; metal ion binding [GO:0046872]; protein-macromolecule adaptor activity [GO:0030674]	collagen-containing extracellular matrix [GO:0062023]; collagen trimer [GO:0005581]; collagen type XI trimer [GO:0005592]; endoplasmic reticulum lumen [GO:0005788]; extracellular matrix [GO:0031012]; extracellular region [GO:0005576]; extracellular space [GO:0005615]	GO:0001501; GO:0005201; GO:0005576; GO:0005581; GO:0005592; GO:0005615; GO:0005788; GO:0007605; GO:0030020; GO:0030198; GO:0030199; GO:0030674; GO:0031012; GO:0046872; GO:0051216; GO:0060021; GO:0060023; GO:0062023	R-HSA-1442490;R-HSA-1650814;R-HSA-2022090;R-HSA-3000171;R-HSA-8874081;R-HSA-8948216;	hsa:1302;	18.2189	18.2025	18.0503	17.9495	17.9097	18.3603	18.4671	17.5283	17.5339	16.8385	17.7159	17.3578	17.6891	17.9055
FZD6_O60353	0.576969	1.3243	0.452322	0.359147	1.20101	0.559065	0.792959	-0.193174	-0.0195567	-2	-1.55307	-0.00659719	-0.851606	-0.445823	FZD6	Frizzled-6	O60353	1.03603	9.76921e-05	0.00937705	-0.517924	sp|O60353|FZD6_HUMAN Frizzled-6 OS=Homo sapiens OX=9606 GN=FZD6 PE=1 SV=2	FUNCTION: Receptor for Wnt proteins. Most of frizzled receptors are coupled to the beta-catenin canonical signaling pathway, which leads to the activation of disheveled proteins, inhibition of GSK-3 kinase, nuclear accumulation of beta-catenin and activation of Wnt target genes. A second signaling pathway involving PKC and calcium fluxes has been seen for some family members, but it is not yet cl…	SUBCELLULAR LOCATION: Membrane {ECO:0000250|UniProtKB:Q61089}; Multi-pass membrane protein {ECO:0000255}. Cell membrane {ECO:0000250|UniProtKB:Q61089}; Multi-pass membrane protein {ECO:0000255}. Cell surface {ECO:0000250|UniProtKB:Q61089}. Apical cell membrane; Multi-pass membrane protein {ECO:0000255}. Cytoplasmic vesicle membrane {ECO:0000250|UniProtKB:Q61089}; Multi-pass membrane protein {ECO:…	DISEASE: Nail disorder, non-syndromic congenital, 1 (NDNC1) [MIM:161050]: An autosomal recessive nail disorder characterized by a variable degree of onychauxis (thick nails), hyponychia, and onycholysis of all nails, with claw-shaped fingernails in some individuals. No other anomalies of ectodermal tissues, including hair, teeth, sweat glands, or skin, are noted, and individuals with dysplastic n…	canonical Wnt signaling pathway [GO:0060070]; cell proliferation in midbrain [GO:0033278]; embryonic nail plate morphogenesis [GO:0035880]; establishment of body hair planar orientation [GO:0048105]; hair follicle development [GO:0001942]; inner ear morphogenesis [GO:0042472]; midbrain morphogenesis [GO:1904693]; negative regulation of canonical Wnt signaling pathway [GO:0090090]; negative regula…	G protein-coupled receptor activity [GO:0004930]; ubiquitin protein ligase binding [GO:0031625]; Wnt-activated receptor activity [GO:0042813]; Wnt-protein binding [GO:0017147]	apical plasma membrane [GO:0016324]; apicolateral plasma membrane [GO:0016327]; cell surface [GO:0009986]; cytoplasmic vesicle membrane [GO:0030659]; endoplasmic reticulum membrane [GO:0005789]; integral component of membrane [GO:0016021]; integral component of plasma membrane [GO:0005887]; plasma membrane [GO:0005886]	GO:0001843; GO:0001942; GO:0004930; GO:0005789; GO:0005886; GO:0005887; GO:0007223; GO:0009986; GO:0016021; GO:0016324; GO:0016327; GO:0017147; GO:0030168; GO:0030659; GO:0031625; GO:0033278; GO:0035567; GO:0035880; GO:0042472; GO:0042813; GO:0043433; GO:0048105; GO:0060070; GO:0060071; GO:0090090; GO:1904693	R-HSA-373080;R-HSA-4086398;R-HSA-4086400;R-HSA-4641263;R-HSA-5340588;	hsa:8323;	14.833	15.0903	14.7901	14.7581	15.0479	14.8269	14.9074	14.5679	14.6277	13.8785	14.0998	14.6322	14.3413	14.481
TAF5L_O75529	-0.253643	-1.07936	-0.649924	-1.02969	-0.767749	-1.07308	-1.18673	0.799005	1.68297	1.01658	1.43677	0.412516	0.0630335	0.62929	TAF5L	TAF5-like RNA polymerase II p300/CBP-associated factor-associated factor 65 kDa subunit 5L	O75529	1.03386	9.81032e-05	0.00937705	0.49282	sp|O75529|TAF5L_HUMAN TAF5-like RNA polymerase II p300/CBP-associated factor-associated factor 65 kDa subunit 5L OS=Homo sapiens OX=9606 GN=TAF5L PE=1 SV=1	FUNCTION: Functions as a component of the PCAF complex. The PCAF complex is capable of efficiently acetylating histones in a nucleosomal context. The PCAF complex could be considered as the human version of the yeast SAGA complex (Probable). With TAF6L, acts as an epigenetic regulator essential for somatic reprogramming. Regulates target genes through H3K9ac deposition and MYC recruitment which t…	SUBCELLULAR LOCATION: Nucleus {ECO:0000269|PubMed:11564863, ECO:0000269|PubMed:9674425}.		histone H3 acetylation [GO:0043966]; regulation of somatic stem cell population maintenance [GO:1904672]; regulation of transcription, DNA-templated [GO:0006355]; transcription by RNA polymerase II [GO:0006366]	transcription coactivator activity [GO:0003713]	cytoplasmic ribonucleoprotein granule [GO:0036464]; nuclear speck [GO:0016607]; nucleus [GO:0005634]; STAGA complex [GO:0030914]; transcription factor TFTC complex [GO:0033276]	GO:0003713; GO:0005634; GO:0006355; GO:0006366; GO:0016607; GO:0030914; GO:0033276; GO:0036464; GO:0043966; GO:1904672	R-HSA-3214847;	hsa:27097;	14.7278	14.492	14.6146	14.5061	14.5809	14.4937	14.4613	15.0284	15.2808	15.0905	15.2105	14.918	14.8182	14.9799
SERPINB1_P30740	-0.156402	0.303384	1.3058	1.12188	0.853519	1.45949	0.789595	-0.409007	-1.51954	-1.36301	-0.121702	-0.906285	-0.263081	-1.09464	SERPINB1	Leukocyte elastase inhibitor	P30740	1.04502	9.91472e-05	0.00937705	-0.699349	sp|P30740|ILEU_HUMAN Leukocyte elastase inhibitor OS=Homo sapiens OX=9606 GN=SERPINB1 PE=1 SV=1	FUNCTION: Neutrophil serine protease inhibitor that plays an essential role in the regulation of the innate immune response, inflammation and cellular homeostasis (PubMed:30692621). Acts primarily to protect the cell from proteases released in the cytoplasm during stress or infection. These proteases are important in killing microbes but when released from granules, these potent enzymes also dest…	SUBCELLULAR LOCATION: Secreted {ECO:0000269|PubMed:26701651}. Cytoplasm {ECO:0000269|PubMed:23269243}. Cytolytic granule {ECO:0000269|PubMed:23269243}. Early endosome {ECO:0000269|PubMed:23269243}.		negative regulation of endopeptidase activity [GO:0010951]; negative regulation of interleukin-1 beta production [GO:0032691]; neutrophil degranulation [GO:0043312]; type B pancreatic cell proliferation [GO:0044342]	peptidase inhibitor activity [GO:0030414]; serine-type endopeptidase inhibitor activity [GO:0004867]	collagen-containing extracellular matrix [GO:0062023]; cytoplasmic ribonucleoprotein granule [GO:0036464]; extracellular exosome [GO:0070062]; extracellular region [GO:0005576]; extracellular space [GO:0005615]; membrane [GO:0016020]; secretory granule lumen [GO:0034774]	GO:0004867; GO:0005576; GO:0005615; GO:0010951; GO:0016020; GO:0030414; GO:0032691; GO:0034774; GO:0036464; GO:0043312; GO:0044342; GO:0062023; GO:0070062	R-HSA-6798695;	hsa:1992;	15.8155	16.0138	16.4459	16.3666	16.2509	16.5122	16.2234	15.7066	15.2278	15.2953	15.8305	15.4922	15.7695	15.411
SERPINB9_P50453	0.0758757	0.949491	1.52262	-0.661005	0.769483	0.814901	1.11149	-0.718901	-0.738085	0.739315	-1.90749	-1.11559	-0.425217	-0.416887	SERPINB9	Serpin B9	P50453	1.02187	9.94118e-05	0.00937705	-0.405612	sp|P50453|SPB9_HUMAN Serpin B9 OS=Homo sapiens OX=9606 GN=SERPINB9 PE=1 SV=1	FUNCTION: Granzyme B inhibitor.	SUBCELLULAR LOCATION: Cytoplasm.		cellular response to estrogen stimulus [GO:0071391]; immune response [GO:0006955]; mast cell mediated immunity [GO:0002448]; negative regulation by symbiont of host apoptotic process [GO:0033668]; negative regulation of apoptotic process [GO:0043066]; negative regulation of endopeptidase activity [GO:0010951]; positive regulation of gene expression [GO:0010628]; protection from natural killer cel…	cysteine-type endopeptidase inhibitor activity involved in apoptotic process [GO:0043027]; protease binding [GO:0002020]; serine-type endopeptidase inhibitor activity [GO:0004867]	collagen-containing extracellular matrix [GO:0062023]; cytoplasm [GO:0005737]; cytosol [GO:0005829]; extracellular exosome [GO:0070062]; extracellular space [GO:0005615]; Golgi apparatus [GO:0005794]; membrane [GO:0016020]; nucleoplasm [GO:0005654]; nucleus [GO:0005634]	GO:0002020; GO:0002448; GO:0004867; GO:0005615; GO:0005634; GO:0005654; GO:0005737; GO:0005794; GO:0005829; GO:0006955; GO:0009617; GO:0010628; GO:0010951; GO:0016020; GO:0033668; GO:0042270; GO:0043027; GO:0043066; GO:0062023; GO:0070062; GO:0071391		hsa:5272;	18.7755	19.0461	19.2237	18.5473	18.9904	19.0044	19.0963	18.5293	18.5234	18.981	18.1611	18.4064	18.6203	18.6229
ASAH1_Q13510	0.0485407	-1.32234	-0.336179	-0.210542	-1.13667	-0.940624	-1.32804	0.457797	0.210614	1.81109	1.74067	0.539971	0.53887	-0.0731497	ASAH1	Acid ceramidase;Acid ceramidase subunit alpha;Acid ceramidase subunit beta	Q13510	1.02364	0.000107138	0.00988161	0.457904	sp|Q13510|ASAH1_HUMAN Acid ceramidase OS=Homo sapiens OX=9606 GN=ASAH1 PE=1 SV=5	FUNCTION: Lysosomal ceramidase that hydrolyzes sphingolipid ceramides into sphingosine and free fatty acids at acidic pH (PubMed:10610716, PubMed:7744740, PubMed:15655246, PubMed:11451951). Ceramides, sphingosine, and its phosphorylated form sphingosine-1-phosphate are bioactive lipids that mediate cellular signaling pathways regulating several biological processes including cell proliferation, a…	SUBCELLULAR LOCATION: Lysosome {ECO:0000269|PubMed:12764132}. Secreted {ECO:0000269|PubMed:7744740}. Note=Secretion is extremely low and localization to lysosomes is mannose-6-phosphate receptor-dependent. {ECO:0000269|PubMed:11451951}.; SUBCELLULAR LOCATION: [Isoform 2]: Nucleus {ECO:0000305|PubMed:22927646}. Cytoplasm {ECO:0000305|PubMed:22927646}. Note=A localization to the nucleus and the cyt…	DISEASE: Farber lipogranulomatosis (FRBRL) [MIM:228000]: An autosomal recessive lysosomal storage disorder characterized by subcutaneous lipid-loaded nodules, excruciating pain in the joints and extremities, and marked accumulation of ceramide in lysosomes. Disease severity is variable. The most severe disease subtype is a rare neonatal form with death occurring before 1 year of age. {ECO:0000269…	cellular response to tumor necrosis factor [GO:0071356]; ceramide biosynthetic process [GO:0046513]; ceramide catabolic process [GO:0046514]; fatty acid metabolic process [GO:0006631]; glycosphingolipid metabolic process [GO:0006687]; keratinocyte differentiation [GO:0030216]; negative regulation of nucleic acid-templated transcription [GO:1903507]; neutrophil degranulation [GO:0043312]; regulati…	ceramidase activity [GO:0102121]; fatty acid amide hydrolase activity [GO:0017064]; hydrolase activity, acting on carbon-nitrogen (but not peptide) bonds [GO:0016810]; hydrolase activity, acting on carbon-nitrogen (but not peptide) bonds, in linear amides [GO:0016811]; N-acylsphingosine amidohydrolase activity [GO:0017040]; nuclear receptor binding [GO:0016922]; transcription corepressor activity…	extracellular exosome [GO:0070062]; extracellular region [GO:0005576]; extracellular space [GO:0005615]; ficolin-1-rich granule lumen [GO:1904813]; lysosomal lumen [GO:0043202]; lysosome [GO:0005764]; nucleus [GO:0005634]; tertiary granule lumen [GO:1904724]	GO:0003714; GO:0005576; GO:0005615; GO:0005634; GO:0005764; GO:0006631; GO:0006687; GO:0016810; GO:0016811; GO:0016922; GO:0017040; GO:0017064; GO:0030216; GO:0043202; GO:0043312; GO:0046512; GO:0046513; GO:0046514; GO:0050810; GO:0062098; GO:0070062; GO:0071356; GO:0102121; GO:1903507; GO:1904724; GO:1904813	R-HSA-1660662;R-HSA-6798695;	hsa:427;	19.6162	19.1958	19.4982	19.5368	19.2528	19.3129	19.1941	19.7417	19.6659	20.1568	20.1352	19.7669	19.7666	19.5789
ATP1A2_P50993	0.723096	2	0.724509	0.343087	1.12122	0.25112	0.601575	-1.3271	-0.924459	-0.335594	-0.377118	-0.613851	-1.43587	-0.80056	ATP1A2	Sodium/potassium-transporting ATPase subunit alpha-2	P50993	1.02972	0.000107285	0.00988161	-0.600774	sp|P50993|AT1A2_HUMAN Sodium/potassium-transporting ATPase subunit alpha-2 OS=Homo sapiens OX=9606 GN=ATP1A2 PE=1 SV=1	FUNCTION: This is the catalytic component of the active enzyme, which catalyzes the hydrolysis of ATP coupled with the exchange of sodium and potassium ions across the plasma membrane. This action creates the electrochemical gradient of sodium and potassium, providing the energy for active transport of various nutrients.	SUBCELLULAR LOCATION: Membrane {ECO:0000269|PubMed:7711835}; Multi-pass membrane protein {ECO:0000269|PubMed:7711835}. Cell membrane {ECO:0000269|PubMed:7711835}; Multi-pass membrane protein {ECO:0000269|PubMed:7711835}.	DISEASE: Migraine, familial hemiplegic, 2 (FHM2) [MIM:602481]: A subtype of migraine with aura associated with hemiparesis in some families. Migraine is a disabling symptom complex of periodic headaches, usually temporal and unilateral. Headaches are often accompanied by irritability, nausea, vomiting and photophobia, preceded by constriction of the cranial arteries. Migraine with aura is charact…	adult locomotory behavior [GO:0008344]; amygdala development [GO:0021764]; ATP metabolic process [GO:0046034]; behavioral fear response [GO:0001662]; cardiac muscle contraction [GO:0060048]; cation transmembrane transport [GO:0098655]; cell communication by electrical coupling involved in cardiac conduction [GO:0086064]; cellular potassium ion homeostasis [GO:0030007]; cellular response to mechan…	ATPase activity [GO:0016887]; ATPase-coupled cation transmembrane transporter activity [GO:0019829]; ATP binding [GO:0005524]; chaperone binding [GO:0051087]; phosphatase activity [GO:0016791]; potassium ion binding [GO:0030955]; protein heterodimerization activity [GO:0046982]; P-type sodium:potassium-exchanging transporter activity [GO:0005391]; sodium ion binding [GO:0031402]; steroid binding …	caveola [GO:0005901]; cell projection [GO:0042995]; cytoplasm [GO:0005737]; dendritic spine [GO:0043197]; endosome [GO:0005768]; extracellular vesicle [GO:1903561]; intercalated disc [GO:0014704]; membrane [GO:0016020]; neuronal cell body [GO:0043025]; organelle membrane [GO:0031090]; plasma membrane [GO:0005886]; sodium:potassium-exchanging ATPase complex [GO:0005890]; T-tubule [GO:0030315]	GO:0001504; GO:0001662; GO:0002026; GO:0002087; GO:0005391; GO:0005496; GO:0005524; GO:0005737; GO:0005768; GO:0005886; GO:0005890; GO:0005901; GO:0006813; GO:0006814; GO:0006883; GO:0006937; GO:0006940; GO:0006942; GO:0008217; GO:0008344; GO:0008542; GO:0010881; GO:0010996; GO:0014704; GO:0016020; GO:0016791; GO:0016887; GO:0019229; GO:0019829; GO:0021764; GO:0021989; GO:0030007; GO:0030315; GO:…	R-HSA-5578775;R-HSA-936837;R-HSA-9679191;	hsa:477;	20.7762	21.2561	20.7767	20.6388	20.9202	20.6055	20.7323	20.0348	20.1804	20.3934	20.3784	20.2928	19.9955	20.2252
TNFRSF12A_Q9NP84	-0.290508	-1.00459	-0.372	-1.0799	-1.13627	-0.739963	-0.958699	0.69392	1.79482	1.64555	0.979694	0.338243	-0.353916	0.483623	TNFRSF12A	Tumor necrosis factor receptor superfamily member 12A	Q9NP84	1.07536	0.000110313	0.00992545	1.08834	sp|Q9NP84|TNR12_HUMAN Tumor necrosis factor receptor superfamily member 12A OS=Homo sapiens OX=9606 GN=TNFRSF12A PE=1 SV=1	FUNCTION: Receptor for TNFSF12/TWEAK. Weak inducer of apoptosis in some cell types. Promotes angiogenesis and the proliferation of endothelial cells. May modulate cellular adhesion to matrix proteins. {ECO:0000269|PubMed:11728344}.	SUBCELLULAR LOCATION: Membrane; Single-pass type I membrane protein.		angiogenesis [GO:0001525]; apoptotic process [GO:0006915]; cell adhesion [GO:0007155]; cell differentiation [GO:0030154]; positive regulation of apoptotic process [GO:0043065]; positive regulation of extrinsic apoptotic signaling pathway [GO:2001238]; regulation of wound healing [GO:0061041]; tumor necrosis factor-mediated signaling pathway [GO:0033209]		integral component of membrane [GO:0016021]; plasma membrane [GO:0005886]	GO:0001525; GO:0005886; GO:0006915; GO:0007155; GO:0016021; GO:0030154; GO:0033209; GO:0043065; GO:0061041; GO:2001238	R-HSA-5668541;R-HSA-5676594;	hsa:51330;	14.7875	14.3002	14.7319	14.2488	14.2104	14.4808	14.3315	15.4593	16.2106	16.1087	15.6543	15.2166	14.7442	15.3158
GRK5_P34947	-0.0578931	1.05731	0.0822503	-0.101436	0.42275	1.42642	2	-1.18051	-0.644479	-1.23168	-0.949603	-0.703272	-0.489742	0.215937	GRK5	G protein-coupled receptor kinase 5	P34947	1.02381	0.000111248	0.00992545	-0.38055	sp|P34947|GRK5_HUMAN G protein-coupled receptor kinase 5 OS=Homo sapiens OX=9606 GN=GRK5 PE=1 SV=1	FUNCTION: Serine/threonine kinase that phosphorylates preferentially the activated forms of a variety of G-protein-coupled receptors (GPCRs). Such receptor phosphorylation initiates beta-arrestin-mediated receptor desensitization, internalization, and signaling events leading to their down-regulation. Phosphorylates a variety of GPCRs, including adrenergic receptors, muscarinic acetylcholine rece…	SUBCELLULAR LOCATION: Cytoplasm. Nucleus. Cell membrane; Peripheral membrane protein. Note=Predominantly localized at the plasma membrane; targeted to the cell surface through the interaction with phospholipids. Nucleus localization is regulated in a GPCR and Ca(2+)/calmodulin-dependent fashion.		adenylate cyclase-modulating G protein-coupled receptor signaling pathway [GO:0007188]; apoptotic process [GO:0006915]; G protein-coupled receptor signaling pathway [GO:0007186]; negative regulation of apoptotic process [GO:0043066]; positive regulation of cell population proliferation [GO:0008284]; protein autophosphorylation [GO:0046777]; regulation of cell cycle [GO:0051726]; regulation of G p…	ATP binding [GO:0005524]; beta-adrenergic receptor kinase activity [GO:0047696]; G protein-coupled receptor kinase activity [GO:0004703]; phospholipid binding [GO:0005543]; protein kinase C binding [GO:0005080]; protein serine/threonine kinase activity [GO:0004674]	cytoplasm [GO:0005737]; cytosol [GO:0005829]; nuclear membrane [GO:0031965]; nuclear speck [GO:0016607]; plasma membrane [GO:0005886]	GO:0004674; GO:0004703; GO:0005080; GO:0005524; GO:0005543; GO:0005737; GO:0005829; GO:0005886; GO:0006915; GO:0007186; GO:0007188; GO:0007217; GO:0008277; GO:0008284; GO:0016055; GO:0016607; GO:0031965; GO:0043066; GO:0046777; GO:0047696; GO:0051726	R-HSA-416476;R-HSA-418555;	hsa:2869;	16.1575	16.4555	16.1949	16.1458	16.2859	16.5542	16.7486	15.8574	16.0007	15.8437	15.9191	15.985	16.042	16.2306
ACOT1_Q86TX2	-0.318473	-0.0420679	0.268573	0.857343	0.617923	1.19927	1.98642	-1.46209	-0.929016	-0.295659	-0.583789	-1.27564	-0.807384	0.784585	ACOT1	Acyl-coenzyme A thioesterase 1;Acyl-coenzyme A thioesterase 2, mitochondrial	Q86TX2	1.02473	0.000111565	0.00992545	-0.484838	sp|Q86TX2|ACOT1_HUMAN Acyl-coenzyme A thioesterase 1 OS=Homo sapiens OX=9606 GN=ACOT1 PE=1 SV=1;sp|P49753|ACOT2_HUMAN Acyl-coenzyme A thioesterase 2, mitochondrial OS=Homo sapiens OX=9606 GN=ACOT2 PE=1 SV=6	FUNCTION: Acyl-CoA thioesterases are a group of enzymes that catalyze the hydrolysis of acyl-CoAs into free fatty acids and coenzyme A (CoASH), regulating intracellular levels of acyl-CoAs, free fatty acids and CoASH. More active towards saturated and unsaturated long chain fatty acyl-CoAs (C12-C20). {ECO:0000269|PubMed:16940157}.	SUBCELLULAR LOCATION: Cytoplasm, cytosol {ECO:0000269|PubMed:16940157}.		acyl-CoA metabolic process [GO:0006637]; fatty acid metabolic process [GO:0006631]; long-chain fatty acid metabolic process [GO:0001676]; very long-chain fatty acid metabolic process [GO:0000038]	acyl-CoA hydrolase activity [GO:0047617]; carboxylic ester hydrolase activity [GO:0052689]; myristoyl-CoA hydrolase activity [GO:0102991]; palmitoyl-CoA hydrolase activity [GO:0016290]	cytosol [GO:0005829]	GO:0000038; GO:0001676; GO:0005829; GO:0006631; GO:0006637; GO:0016290; GO:0047617; GO:0052689; GO:0102991	R-HSA-77289;	hsa:641371;	19.731	19.8337	19.9491	20.1677	20.0788	20.2947	20.5871	19.3063	19.5043	19.7395	19.6325	19.3755	19.5495	20.1407
CACNB2_Q08289	0.629392	1.54528	0.61288	1.20845	1.30244	-0.161471	0.407433	-0.374694	-0.635153	-1.35179	0.179825	-1.01766	-1.56174	-0.783195	CACNB2	Voltage-dependent L-type calcium channel subunit beta-2	Q08289	1.02189	0.000114251	0.0100503	-0.420728	sp|Q08289|CACB2_HUMAN Voltage-dependent L-type calcium channel subunit beta-2 OS=Homo sapiens OX=9606 GN=CACNB2 PE=1 SV=3	FUNCTION: The beta subunit of voltage-dependent calcium channels contributes to the function of the calcium channel by increasing peak calcium current, shifting the voltage dependencies of activation and inactivation, modulating G protein inhibition and controlling the alpha-1 subunit membrane targeting.	SUBCELLULAR LOCATION: Cell membrane, sarcolemma {ECO:0000250}; Peripheral membrane protein {ECO:0000250}; Cytoplasmic side {ECO:0000250}.	DISEASE: Brugada syndrome 4 (BRGDA4) [MIM:611876]: A heart disease characterized by the association of Brugada syndrome with shortened QT intervals. Brugada syndrome is a tachyarrhythmia characterized by right bundle branch block and ST segment elevation on an electrocardiogram (ECG). It can cause the ventricles to beat so fast that the blood is prevented from circulating efficiently in the body.…	calcium ion import [GO:0070509]; cardiac conduction [GO:0061337]; chemical synaptic transmission [GO:0007268]; membrane depolarization during atrial cardiac muscle cell action potential [GO:0098912]; membrane depolarization during AV node cell action potential [GO:0086045]; neuromuscular junction development [GO:0007528]; positive regulation of calcium ion transmembrane transport via high voltage…	actin filament binding [GO:0051015]; calcium channel activity [GO:0005262]; voltage-gated calcium channel activity [GO:0005245]; voltage-gated calcium channel activity involved in positive regulation of presynaptic cytosolic calcium levels [GO:0099635]	integral component of plasma membrane [GO:0005887]; L-type voltage-gated calcium channel complex [GO:1990454]; photoreceptor ribbon synapse [GO:0098684]; plasma membrane [GO:0005886]; presynapse [GO:0098793]; voltage-gated calcium channel complex [GO:0005891]	GO:0005245; GO:0005262; GO:0005886; GO:0005887; GO:0005891; GO:0007268; GO:0007528; GO:0007601; GO:0051015; GO:0051928; GO:0061337; GO:0070509; GO:0072659; GO:0086045; GO:0086091; GO:0098684; GO:0098793; GO:0098912; GO:0099635; GO:1901385; GO:1901843; GO:1904879; GO:1990454	R-HSA-112308;R-HSA-400042;R-HSA-419037;R-HSA-422356;R-HSA-5576892;R-HSA-5576893;	hsa:783;	19.6017	19.8449	19.5973	19.7555	19.7804	19.3916	19.5427	19.335	19.2658	19.0755	19.4823	19.1642	19.0197	19.2265
NID2_Q14112	0.161509	1.62806	0.959564	-0.24134	0.139403	1.51014	1.36993	-1.00745	-0.482481	-0.273685	-0.683789	-1.19295	-1.23851	-0.648403	NID2	Nidogen-2	Q14112	1.04082	0.000119378	0.0103846	-0.820052	sp|Q14112|NID2_HUMAN Nidogen-2 OS=Homo sapiens OX=9606 GN=NID2 PE=1 SV=3	FUNCTION: Cell adhesion glycoprotein which is widely distributed in basement membranes. Binds to collagens I and IV, to perlecan and to laminin 1. Does not bind fibulins. It probably has a role in cell-extracellular matrix interactions.	SUBCELLULAR LOCATION: Secreted, extracellular space, extracellular matrix, basement membrane.		basement membrane organization [GO:0071711]; cell adhesion [GO:0007155]; cell-matrix adhesion [GO:0007160]; extracellular matrix organization [GO:0030198]	calcium ion binding [GO:0005509]; collagen binding [GO:0005518]; extracellular matrix structural constituent [GO:0005201]	basement membrane [GO:0005604]; collagen-containing extracellular matrix [GO:0062023]; extracellular exosome [GO:0070062]; extracellular region [GO:0005576]; extracellular space [GO:0005615]; plasma membrane [GO:0005886]	GO:0005201; GO:0005509; GO:0005518; GO:0005576; GO:0005604; GO:0005615; GO:0005886; GO:0007155; GO:0007160; GO:0030198; GO:0062023; GO:0070062; GO:0071711	R-HSA-3000157;	hsa:22795;	20.5825	21.344	20.9969	20.3733	20.571	21.2828	21.21	19.9755	20.2481	20.3565	20.1436	19.8792	19.8555	20.1619
DUSP27_Q5VZP5	-0.0939499	-0.890925	-1.90396	0.167442	-0.176138	-1.30744	-1.26408	1.30819	1.01742	0.370231	1.00691	0.95536	0.222382	0.588553	DUSP27	Inactive dual specificity phosphatase 27	Q5VZP5	1.01836	0.000120927	0.0104037	0.382587	sp|Q5VZP5|DUS27_HUMAN Inactive dual specificity phosphatase 27 OS=Homo sapiens OX=9606 GN=DUSP27 PE=2 SV=1	FUNCTION: May be required for myofiber maturation. {ECO:0000250|UniProtKB:F1QWM2}.	SUBCELLULAR LOCATION: Cytoplasm, myofibril, sarcomere {ECO:0000250|UniProtKB:F1QWM2}.			protein tyrosine/serine/threonine phosphatase activity [GO:0008138]	sarcomere [GO:0030017]	GO:0008138; GO:0030017		hsa:92235;	21.0116	20.8165	20.5685	21.0756	20.9915	20.7145	20.7251	21.3549	21.2837	21.1253	21.2812	21.2685	21.0891	21.1787
LAMA4_Q16363	-0.0218003	1.98557	0.654954	0.162105	0.783431	1.15003	0.907288	-1.0025	-0.230807	-0.32277	-0.505382	-1.19497	-1.49839	-0.866758	LAMA4	Laminin subunit alpha-4	Q16363	1.03229	0.000122417	0.0104174	-0.651944	sp|Q16363|LAMA4_HUMAN Laminin subunit alpha-4 OS=Homo sapiens OX=9606 GN=LAMA4 PE=1 SV=4	FUNCTION: Binding to cells via a high affinity receptor, laminin is thought to mediate the attachment, migration and organization of cells into tissues during embryonic development by interacting with other extracellular matrix components.	SUBCELLULAR LOCATION: Secreted, extracellular space, extracellular matrix, basement membrane. Note=Major component.	DISEASE: Cardiomyopathy, dilated 1JJ (CMD1JJ) [MIM:615235]: A disorder characterized by ventricular dilation and impaired systolic function, resulting in congestive heart failure and arrhythmia. Patients are at risk of premature death. {ECO:0000269|PubMed:17646580}. Note=The disease is caused by variants affecting the gene represented in this entry.	cell adhesion [GO:0007155]; extracellular matrix organization [GO:0030198]; negative regulation of cold-induced thermogenesis [GO:0120163]; regulation of cell adhesion [GO:0030155]; regulation of cell migration [GO:0030334]; regulation of embryonic development [GO:0045995]	extracellular matrix structural constituent [GO:0005201]; signaling receptor binding [GO:0005102]	basement membrane [GO:0005604]; collagen-containing extracellular matrix [GO:0062023]; extracellular exosome [GO:0070062]; extracellular region [GO:0005576]	GO:0005102; GO:0005201; GO:0005576; GO:0005604; GO:0007155; GO:0030155; GO:0030198; GO:0030334; GO:0045995; GO:0062023; GO:0070062; GO:0120163	R-HSA-3000157;R-HSA-3000171;R-HSA-3000178;R-HSA-8874081;	hsa:3910;	20.5082	21.323	20.7829	20.5828	20.835	20.9838	20.8853	20.1101	20.4233	20.386	20.3119	20.032	19.9088	20.1652
DSC2_Q02487	0.129411	1.81522	0.923432	0.309513	1.12146	0.760155	0.650267	-0.968174	-0.336365	-0.430315	-0.0383419	-1.39112	-1.45979	-1.08536	DSC2	Desmocollin-2	Q02487	1.03548	0.000125343	0.0105486	-0.648739	sp|Q02487|DSC2_HUMAN Desmocollin-2 OS=Homo sapiens OX=9606 GN=DSC2 PE=1 SV=1	FUNCTION: Component of intercellular desmosome junctions. Involved in the interaction of plaque proteins and intermediate filaments mediating cell-cell adhesion. May contribute to epidermal cell positioning (stratification) by mediating differential adhesiveness between cells that express different isoforms.	SUBCELLULAR LOCATION: Cell membrane {ECO:0000269|PubMed:21062920}; Single-pass type I membrane protein {ECO:0000269|PubMed:21062920}. Cell junction, desmosome {ECO:0000269|PubMed:21062920}.	DISEASE: Arrhythmogenic right ventricular dysplasia, familial, 11 (ARVD11) [MIM:610476]: A congenital heart disease characterized by infiltration of adipose and fibrous tissue into the right ventricle and loss of myocardial cells, resulting in ventricular and supraventricular arrhythmias. {ECO:0000269|PubMed:17033975, ECO:0000269|PubMed:19863551, ECO:0000269|PubMed:21062920, ECO:0000269|PubMed:28…	bundle of His cell-Purkinje myocyte adhesion involved in cell communication [GO:0086073]; cardiac muscle cell-cardiac muscle cell adhesion [GO:0086042]; cell adhesion [GO:0007155]; cell-cell adhesion [GO:0098609]; cellular response to starvation [GO:0009267]; cornification [GO:0070268]; homophilic cell adhesion via plasma membrane adhesion molecules [GO:0007156]; keratinization [GO:0031424]; regu…	calcium ion binding [GO:0005509]; cell adhesive protein binding involved in bundle of His cell-Purkinje myocyte communication [GO:0086083]	adherens junction [GO:0005912]; cell-cell junction [GO:0005911]; cornified envelope [GO:0001533]; cytoplasmic vesicle [GO:0031410]; desmosome [GO:0030057]; extracellular exosome [GO:0070062]; integral component of membrane [GO:0016021]; intercalated disc [GO:0014704]; plasma membrane [GO:0005886]	GO:0001533; GO:0005509; GO:0005886; GO:0005911; GO:0005912; GO:0007155; GO:0007156; GO:0009267; GO:0014704; GO:0016021; GO:0030057; GO:0031410; GO:0031424; GO:0070062; GO:0070268; GO:0086042; GO:0086073; GO:0086083; GO:0086091; GO:0098609; GO:0098911	R-HSA-6805567;R-HSA-6809371;	hsa:1824;	18.6605	19.3309	18.9763	18.7321	19.055	18.9114	18.8677	18.224	18.4753	18.4379	18.5938	18.0558	18.0285	18.1774
CD99_P14209	1.03783	1.61154	0.95338	0.891264	0.943142	-0.16252	0.102043	-0.618765	0.0429005	0.176456	-1.00199	-1.35915	-1.36748	-1.24864	CD99	CD99 antigen	P14209	1.02112	0.00012739	0.0105486	-0.382655	sp|P14209|CD99_HUMAN CD99 antigen OS=Homo sapiens OX=9606 GN=CD99 PE=1 SV=1	FUNCTION: Involved in T-cell adhesion processes and in spontaneous rosette formation with erythrocytes. Plays a role in a late step of leukocyte extravasation helping leukocytes to overcome the endothelial basement membrane. Acts at the same site as, but independently of, PECAM1. Involved in T-cell adhesion processes (By similarity). {ECO:0000250}.	SUBCELLULAR LOCATION: Membrane {ECO:0000305}; Single-pass type I membrane protein {ECO:0000305}.		homotypic cell-cell adhesion [GO:0034109]; positive regulation of neutrophil extravasation [GO:2000391]; regulation of immune response [GO:0050776]; T cell extravasation [GO:0072683]		cytoplasm [GO:0005737]; focal adhesion [GO:0005925]; integral component of plasma membrane [GO:0005887]; plasma membrane [GO:0005886]	GO:0005737; GO:0005886; GO:0005887; GO:0005925; GO:0034109; GO:0050776; GO:0072683; GO:2000391	R-HSA-198933;R-HSA-202733;	hsa:4267;	18.5661	18.709	18.5451	18.5296	18.5425	18.2671	18.333	18.1534	18.3183	18.3515	18.058	17.969	17.9669	17.9966
LUM_P51884	0.0490817	0.897756	2	-0.832697	-0.160892	0.791222	0.896086	-0.809405	-0.385711	0.393897	-1.54189	-0.68124	-0.686129	-0.312212	LUM	Lumican	P51884	1.03146	0.000128	0.0105486	-0.544421	sp|P51884|LUM_HUMAN Lumican OS=Homo sapiens OX=9606 GN=LUM PE=1 SV=2		SUBCELLULAR LOCATION: Secreted, extracellular space, extracellular matrix {ECO:0000250}.		cartilage development [GO:0051216]; collagen fibril organization [GO:0030199]; extracellular matrix organization [GO:0030198]; keratan sulfate biosynthetic process [GO:0018146]; keratan sulfate catabolic process [GO:0042340]; positive regulation of transcription by RNA polymerase II [GO:0045944]; positive regulation of transforming growth factor beta1 production [GO:0032914]; response to growth f…	collagen binding [GO:0005518]; extracellular matrix structural constituent [GO:0005201]; extracellular matrix structural constituent conferring compression resistance [GO:0030021]	collagen-containing extracellular matrix [GO:0062023]; extracellular exosome [GO:0070062]; extracellular matrix [GO:0031012]; extracellular region [GO:0005576]; extracellular space [GO:0005615]; fibrillar collagen trimer [GO:0005583]; Golgi lumen [GO:0005796]; lysosomal lumen [GO:0043202]	GO:0005201; GO:0005518; GO:0005576; GO:0005583; GO:0005615; GO:0005796; GO:0007601; GO:0014070; GO:0018146; GO:0030021; GO:0030198; GO:0030199; GO:0031012; GO:0032914; GO:0042340; GO:0043202; GO:0045944; GO:0051216; GO:0062023; GO:0070062; GO:0070848	R-HSA-2022854;R-HSA-2022857;R-HSA-216083;R-HSA-3000178;R-HSA-3656225;R-HSA-3656243;R-HSA-3656244;	hsa:4060;	17.6031	18.0051	18.7083	17.1855	17.5037	17.9547	18.0043	17.1965	17.3972	17.7665	16.8495	17.2572	17.2549	17.432
METRN_Q9UJH8	0.0364765	0.532531	0.890659	-0.622527	-0.658896	1.76829	1.65833	-1.03028	-0.374705	-0.108319	-0.977288	-1.654	-0.0243745	0.564091	METRN	Meteorin	Q9UJH8	1.03375	0.000131214	0.0105973	-0.478074	sp|Q9UJH8|METRN_HUMAN Meteorin OS=Homo sapiens OX=9606 GN=METRN PE=2 SV=2	FUNCTION: Involved in both glial cell differentiation and axonal network formation during neurogenesis. Promotes astrocyte differentiation and transforms cerebellar astrocytes into radial glia. Also induces axonal extension in small and intermediate neurons of sensory ganglia by activating nearby satellite glia (By similarity). {ECO:0000250}.	SUBCELLULAR LOCATION: Secreted {ECO:0000250}.		glial cell differentiation [GO:0010001]; positive regulation of axonogenesis [GO:0050772]	hormone activity [GO:0005179]	extracellular space [GO:0005615]	GO:0005179; GO:0005615; GO:0010001; GO:0050772		hsa:79006;	14.4215	14.6518	14.818	14.1156	14.0987	15.2254	15.1743	13.9264	14.2306	14.3543	13.9509	13.6368	14.3933	14.6664
BAIAP2L1_Q9UHR4	0.208488	0.821277	1.58742	-0.770556	0.20405	1.5235	1.43509	-0.998653	-0.907215	-0.309425	-1.14708	-0.945903	-0.782862	0.0818745	BAIAP2L1	Brain-specific angiogenesis inhibitor 1-associated protein 2-like protein 1	Q9UHR4	1.03386	0.000131299	0.0105973	-0.534268	sp|Q9UHR4|BI2L1_HUMAN Brain-specific angiogenesis inhibitor 1-associated protein 2-like protein 1 OS=Homo sapiens OX=9606 GN=BAIAP2L1 PE=1 SV=2	FUNCTION: May function as adapter protein. Involved in the formation of clusters of actin bundles. Plays a role in the reorganization of the actin cytoskeleton in response to bacterial infection. {ECO:0000269|PubMed:17430976, ECO:0000269|PubMed:19366662, ECO:0000269|PubMed:22921828}.	SUBCELLULAR LOCATION: Cytoplasm, cytoskeleton {ECO:0000269|PubMed:19366662}. Note=Recruited to actin pedestals that are formed upon infection by bacteria at bacterial attachment sites.		actin crosslink formation [GO:0051764]; actin filament bundle assembly [GO:0051017]; plasma membrane organization [GO:0007009]; positive regulation of actin cytoskeleton reorganization [GO:2000251]; positive regulation of actin filament polymerization [GO:0030838]; regulation of insulin receptor signaling pathway [GO:0046626]; response to bacterium [GO:0009617]	actin binding [GO:0003779]; cadherin binding involved in cell-cell adhesion [GO:0098641]; proline-rich region binding [GO:0070064]	adherens junction [GO:0005912]; cytoskeleton [GO:0005856]; cytosol [GO:0005829]; extracellular exosome [GO:0070062]; nucleoplasm [GO:0005654]; plasma membrane [GO:0005886]	GO:0003779; GO:0005654; GO:0005829; GO:0005856; GO:0005886; GO:0005912; GO:0007009; GO:0009617; GO:0030838; GO:0046626; GO:0051017; GO:0051764; GO:0070062; GO:0070064; GO:0098641; GO:2000251		hsa:55971;	16.1241	16.3528	16.6388	15.7586	16.1224	16.6149	16.5819	15.6734	15.7076	15.9307	15.618	15.6931	15.754	16.0768
METTL7A_Q9H8H3	0.359796	0.898005	1.95608	1.04032	0.90447	0.323919	0.342132	-0.705073	-1.08656	-1.16354	0.0847454	-1.12365	-1.17855	-0.652109	METTL7A	Methyltransferase-like protein 7A	Q9H8H3	1.04377	0.000138882	0.0108273	-0.652968	sp|Q9H8H3|MET7A_HUMAN Methyltransferase-like protein 7A OS=Homo sapiens OX=9606 GN=METTL7A PE=1 SV=1	FUNCTION: Probable methyltransferase. {ECO:0000250}.	SUBCELLULAR LOCATION: Lipid droplet {ECO:0000269|PubMed:18477614, ECO:0000269|PubMed:19773358}. Endoplasmic reticulum {ECO:0000269|PubMed:19773358}. Membrane {ECO:0000269|PubMed:18477614}.		methylation [GO:0032259]; neutrophil degranulation [GO:0043312]	methyltransferase activity [GO:0008168]	endoplasmic reticulum [GO:0005783]; extracellular region [GO:0005576]; lipid droplet [GO:0005811]; membrane [GO:0016020]; tertiary granule lumen [GO:1904724]	GO:0005576; GO:0005783; GO:0005811; GO:0008168; GO:0016020; GO:0032259; GO:0043312; GO:1904724	R-HSA-6798695;	hsa:25840;	15.3853	15.5965	16.0116	15.6523	15.599	15.3712	15.3784	14.9675	14.8178	14.7876	15.2774	14.8033	14.7817	14.9883
COL14A1_Q05707	-0.638229	1.01038	0.780037	-0.0262959	0.790533	1.02988	1.92597	-0.918217	-0.371415	-0.170152	-1.51731	-0.899701	-1.18711	0.191637	COL14A1	Collagen alpha-1(XIV) chain	Q05707	1.03137	0.000139779	0.0108273	-0.556749	sp|Q05707|COEA1_HUMAN Collagen alpha-1(XIV) chain OS=Homo sapiens OX=9606 GN=COL14A1 PE=1 SV=3	FUNCTION: Plays an adhesive role by integrating collagen bundles. It is probably associated with the surface of interstitial collagen fibrils via COL1. The COL2 domain may then serve as a rigid arm which sticks out from the fibril and protrudes the large N-terminal globular domain into the extracellular space, where it might interact with other matrix molecules or cell surface receptors (By simil…	SUBCELLULAR LOCATION: Secreted, extracellular space, extracellular matrix {ECO:0000250|UniProtKB:P32018}.		cell-cell adhesion [GO:0098609]; collagen fibril organization [GO:0030199]; extracellular matrix organization [GO:0030198]	collagen binding [GO:0005518]; extracellular matrix structural constituent [GO:0005201]; extracellular matrix structural constituent conferring tensile strength [GO:0030020]; protein-macromolecule adaptor activity [GO:0030674]; RNA binding [GO:0003723]	collagen-containing extracellular matrix [GO:0062023]; collagen trimer [GO:0005581]; collagen type XIV trimer [GO:0005596]; endoplasmic reticulum lumen [GO:0005788]; extracellular matrix [GO:0031012]; extracellular region [GO:0005576]; extracellular space [GO:0005615]; interstitial matrix [GO:0005614]	GO:0003723; GO:0005201; GO:0005518; GO:0005576; GO:0005581; GO:0005596; GO:0005614; GO:0005615; GO:0005788; GO:0030020; GO:0030198; GO:0030199; GO:0030674; GO:0031012; GO:0062023; GO:0098609	R-HSA-1442490;R-HSA-1650814;R-HSA-2022090;R-HSA-8948216;	hsa:7373;	17.7695	18.4289	18.3367	18.0143	18.3409	18.4367	18.7951	17.6575	17.8762	17.9567	17.4179	17.665	17.55	18.1014
EPB41L1_Q9H4G0	-0.0465217	2	1.23729	0.401404	0.486691	0.495015	1.04247	-1.10146	-0.529861	-0.754259	-0.143848	-0.992242	-1.44309	-0.681795	EPB41L1	Band 4.1-like protein 1	Q9H4G0	1.02678	0.000141254	0.0108273	-0.470226	sp|Q9H4G0|E41L1_HUMAN Band 4.1-like protein 1 OS=Homo sapiens OX=9606 GN=EPB41L1 PE=1 SV=2	FUNCTION: May function to confer stability and plasticity to neuronal membrane via multiple interactions, including the spectrin-actin-based cytoskeleton, integral membrane channels and membrane-associated guanylate kinases.	SUBCELLULAR LOCATION: Cytoplasm, cytoskeleton.	DISEASE: Mental retardation, autosomal dominant 11 (MRD11) [MIM:614257]: A disorder characterized by significantly below average general intellectual functioning associated with impairments in adaptive behavior and manifested during the developmental period. {ECO:0000269|PubMed:21376300}. Note=The disease is caused by variants affecting the gene represented in this entry.	actomyosin structure organization [GO:0031032]; cortical actin cytoskeleton organization [GO:0030866]	actin binding [GO:0003779]; structural molecule activity [GO:0005198]	cytoskeleton [GO:0005856]; cytosol [GO:0005829]; plasma membrane [GO:0005886]	GO:0003779; GO:0005198; GO:0005829; GO:0005856; GO:0005886; GO:0030866; GO:0031032	R-HSA-399719;R-HSA-6794361;	hsa:2036;	17.7824	18.3877	18.1565	17.9129	17.9378	17.9402	18.0998	17.4749	17.6415	17.5761	17.754	17.5067	17.3753	17.5972
CHST14_Q8NCH0	0.946537	0.528164	1.35946	0.0644472	0.229164	1.37681	1.13351	-1.40223	-0.80963	0.22371	-1.0482	-1.14287	-1.27673	-0.182142	CHST14	Carbohydrate sulfotransferase 14	Q8NCH0	1.02586	0.000141279	0.0108273	-0.435428	sp|Q8NCH0|CHSTE_HUMAN Carbohydrate sulfotransferase 14 OS=Homo sapiens OX=9606 GN=CHST14 PE=1 SV=2	FUNCTION: Catalyzes the transfer of sulfate to position 4 of the N-acetylgalactosamine (GalNAc) residue of dermatan sulfate. Plays a pivotal role in the formation of 4-0-sulfated IdoA blocks in dermatan sulfate. Transfers sulfate to the C-4 hydroxyl of beta1,4-linked GalNAc that is substituted with an alpha-linked iduronic acid (IdoUA) at the C-3 hydroxyl. Transfers sulfate more efficiently to Ga…	SUBCELLULAR LOCATION: Golgi apparatus membrane {ECO:0000250}; Single-pass type II membrane protein {ECO:0000250}.	DISEASE: Ehlers-Danlos syndrome, musculocontractural type 1 (EDSMC1) [MIM:601776]: A form of Ehlers-Danlos syndrome characterized by distinctive craniofacial dysmorphism, congenital contractures of thumbs and fingers, clubfeet, severe kyphoscoliosis, muscular hypotonia, hyperextensible thin skin with easy bruisability and atrophic scarring, wrinkled palms, joint hypermobility, and ocular involvem…	carbohydrate biosynthetic process [GO:0016051]; dermatan sulfate biosynthetic process [GO:0030208]; dermatan sulfate proteoglycan metabolic process [GO:0050655]	N-acetylgalactosamine 4-O-sulfotransferase activity [GO:0001537]; phosphate ion binding [GO:0042301]; sulfotransferase activity [GO:0008146]	extracellular exosome [GO:0070062]; Golgi membrane [GO:0000139]; integral component of membrane [GO:0016021]	GO:0000139; GO:0001537; GO:0008146; GO:0016021; GO:0016051; GO:0030208; GO:0042301; GO:0050655; GO:0070062	R-HSA-2022923;R-HSA-3595174;	hsa:113189;	17.3115	17.1984	17.4231	17.0731	17.1176	17.4278	17.3621	16.6766	16.8368	17.1161	16.7723	16.7467	16.7106	17.0064
HSPG2_P98160	-0.0651482	1.88191	1.41123	-0.702657	0.210794	1.11262	0.835872	-0.996151	-0.00903956	0.19974	-0.917402	-1.17598	-1.1541	-0.631699	HSPG2	Basement membrane-specific heparan sulfate proteoglycan core protein;Endorepellin;LG3 peptide	P98160	1.03582	0.000145466	0.0108273	-0.794914	sp|P98160|PGBM_HUMAN Basement membrane-specific heparan sulfate proteoglycan core protein OS=Homo sapiens OX=9606 GN=HSPG2 PE=1 SV=4	FUNCTION: Integral component of basement membranes. Component of the glomerular basement membrane (GBM), responsible for the fixed negative electrostatic membrane charge, and which provides a barrier which is both size- and charge-selective. It serves as an attachment substrate for cells. Plays essential roles in vascularization. Critical for normal heart development and for regulating the vascul…	SUBCELLULAR LOCATION: Secreted, extracellular space, extracellular matrix, basement membrane.	DISEASE: Schwartz-Jampel syndrome (SJS1) [MIM:255800]: Rare autosomal recessive disorder characterized by permanent myotonia (prolonged failure of muscle relaxation) and skeletal dysplasia, resulting in reduced stature, kyphoscoliosis, bowing of the diaphyses and irregular epiphyses. {ECO:0000269|PubMed:11101850}. Note=The disease is caused by variants affecting the gene represented in this entry…	amyloid fibril formation [GO:1990000]; angiogenesis [GO:0001525]; animal organ morphogenesis [GO:0009887]; brain development [GO:0007420]; cell differentiation [GO:0030154]; circulatory system development [GO:0072359]; extracellular matrix organization [GO:0030198]; glycosaminoglycan biosynthetic process [GO:0006024]; glycosaminoglycan catabolic process [GO:0006027]; inflammatory response [GO:000…	amyloid-beta binding [GO:0001540]; calcium ion binding [GO:0005509]; extracellular matrix structural constituent conferring compression resistance [GO:0030021]; integrin binding [GO:0005178]; low-density lipoprotein particle receptor binding [GO:0050750]; protein C-terminus binding [GO:0008022]	basement membrane [GO:0005604]; collagen-containing extracellular matrix [GO:0062023]; extracellular exosome [GO:0070062]; extracellular region [GO:0005576]; extracellular space [GO:0005615]; focal adhesion [GO:0005925]; Golgi lumen [GO:0005796]; lysosomal lumen [GO:0043202]; plasma membrane [GO:0005886]; plasma membrane protein complex [GO:0098797]	GO:0001523; GO:0001525; GO:0001540; GO:0005178; GO:0005509; GO:0005576; GO:0005604; GO:0005615; GO:0005796; GO:0005886; GO:0005925; GO:0006024; GO:0006027; GO:0006629; GO:0006898; GO:0006954; GO:0007420; GO:0008022; GO:0009887; GO:0009888; GO:0016525; GO:0030021; GO:0030154; GO:0030198; GO:0043202; GO:0050750; GO:0060548; GO:0062023; GO:0070062; GO:0072359; GO:0098797; GO:1905907; GO:1990000	R-HSA-1474228;R-HSA-1971475;R-HSA-2022928;R-HSA-2024096;R-HSA-216083;R-HSA-3000157;R-HSA-3000171;R-HSA-3000178;R-HSA-3560783;R-HSA-3560801;R-HSA-3656237;R-HSA-3656253;R-HSA-4420332;R-HSA-975634;R-HSA-977225;	hsa:3339;	22.5531	23.7095	23.4299	22.1745	22.717	23.2526	23.0882	22.0002	22.5864	22.7104	22.0469	21.8934	21.9064	22.2166
TESC_Q96BS2	0.683205	1.89213	0.511564	0.401866	1.09508	0.237188	0.770442	-1.76775	-0.128729	-0.0741924	-0.682911	-0.631989	-1.22162	-1.08429	TESC	Calcineurin B homologous protein 3	Q96BS2	1.0253	0.000148129	0.0108273	-0.430819	sp|Q96BS2|CHP3_HUMAN Calcineurin B homologous protein 3 OS=Homo sapiens OX=9606 GN=TESC PE=1 SV=3	FUNCTION: Functions as an integral cofactor in cell pH regulation by controlling plasma membrane-type Na(+)/H(+) exchange activity. Promotes the maturation, transport, cell surface stability and exchange activity of SLC9A1/NHE1 at the plasma membrane. Promotes the induction of hematopoietic stem cell differentiation toward megakaryocytic lineage. Essential for the coupling of ERK cascade activati…	SUBCELLULAR LOCATION: Nucleus {ECO:0000269|PubMed:18321853}. Cytoplasm {ECO:0000269|PubMed:18321853}. Membrane {ECO:0000305}; Lipid-anchor {ECO:0000305}. Cell membrane {ECO:0000269|PubMed:18321853}. Cell projection, lamellipodium {ECO:0000269|PubMed:11696366}. Cell projection, ruffle membrane {ECO:0000250|UniProtKB:Q9JKL5}. Note=Colocalizes with SLC9A1 at the plasma membrane. {ECO:0000269|PubMed:…		cellular response to retinoic acid [GO:0071300]; male gonad development [GO:0008584]; megakaryocyte differentiation [GO:0030219]; negative regulation of cell population proliferation [GO:0008285]; positive regulation of gene expression [GO:0010628]; positive regulation of granulocyte differentiation [GO:0030854]; positive regulation of megakaryocyte differentiation [GO:0045654]; positive regulati…	calcium ion binding [GO:0005509]; magnesium ion binding [GO:0000287]; phosphatase inhibitor activity [GO:0019212]; protein homodimerization activity [GO:0042803]; protein kinase inhibitor activity [GO:0004860]	cytoplasm [GO:0005737]; cytosol [GO:0005829]; lamellipodium [GO:0030027]; nucleoplasm [GO:0005654]; nucleus [GO:0005634]; plasma membrane [GO:0005886]; ruffle [GO:0001726]; ruffle membrane [GO:0032587]	GO:0000287; GO:0001726; GO:0004860; GO:0005509; GO:0005634; GO:0005654; GO:0005737; GO:0005829; GO:0005886; GO:0008285; GO:0008584; GO:0010628; GO:0015031; GO:0019212; GO:0030027; GO:0030219; GO:0030854; GO:0032417; GO:0032587; GO:0033628; GO:0042803; GO:0045654; GO:0045893; GO:0050821; GO:0051604; GO:0071300; GO:0072659		hsa:54997;	17.4275	17.7535	17.3812	17.3517	17.5386	17.3073	17.4511	16.7666	17.2086	17.2233	17.0591	17.0729	16.9139	16.9509
ATP2B1_P20020	0.917775	1.82536	1.29332	-0.406938	0.588931	0.682792	0.758821	-0.845719	-0.370289	-0.489133	-0.834191	-1.17826	-1.48904	-0.453424	ATP2B1	Plasma membrane calcium-transporting ATPase 1	P20020	1.02228	0.000148969	0.0108273	-0.424286	sp|P20020|AT2B1_HUMAN Plasma membrane calcium-transporting ATPase 1 OS=Homo sapiens OX=9606 GN=ATP2B1 PE=1 SV=4	FUNCTION: Catalyzes the hydrolysis of ATP coupled with the transport of calcium from the cytoplasm to the extracellular space thereby maintaining intracellular calcium homeostasis. Plays a role in blood pressure regulation through regulation of intracellular calcium concentration and nitric oxide production leading to regulation of vascular smooth muscle cells vasoconstriction. Positively regulat…	SUBCELLULAR LOCATION: Cell membrane {ECO:0000269|PubMed:18029012}; Multi-pass membrane protein {ECO:0000255}. Basolateral cell membrane {ECO:0000250|UniProtKB:G5E829}. Cell junction, synapse {ECO:0000250|UniProtKB:G5E829}. Cell junction, synapse, presynaptic cell membrane {ECO:0000250|UniProtKB:G5E829}; Multi-pass membrane protein {ECO:0000255}. Cytoplasmic vesicle, secretory vesicle, synaptic ve…		aging [GO:0007568]; brain development [GO:0007420]; calcium ion export across plasma membrane [GO:1990034]; cellular calcium ion homeostasis [GO:0006874]; cellular response to corticosterone stimulus [GO:0071386]; cellular response to vitamin D [GO:0071305]; ion transmembrane transport [GO:0034220]; negative regulation of cytokine production [GO:0001818]; negative regulation of cytosolic calcium …	ATPase activity [GO:0016887]; ATPase-coupled cation transmembrane transporter activity [GO:0019829]; ATP binding [GO:0005524]; calcium ion transmembrane transporter activity [GO:0015085]; calmodulin binding [GO:0005516]; metal ion binding [GO:0046872]; PDZ domain binding [GO:0030165]; P-type calcium transporter activity [GO:0005388]; P-type calcium transporter activity involved in regulation of p…	apical plasma membrane [GO:0016324]; basolateral plasma membrane [GO:0016323]; cytoplasmic side of plasma membrane [GO:0009898]; dendritic spine membrane [GO:0032591]; extracellular exosome [GO:0070062]; GABA-ergic synapse [GO:0098982]; glutamatergic synapse [GO:0098978]; immunological synapse [GO:0001772]; integral component of plasma membrane [GO:0005887]; integral component of presynaptic acti…	GO:0001772; GO:0001818; GO:0003056; GO:0003407; GO:0005388; GO:0005516; GO:0005524; GO:0005654; GO:0005886; GO:0005887; GO:0006874; GO:0007420; GO:0007568; GO:0008217; GO:0009409; GO:0009898; GO:0015085; GO:0016020; GO:0016323; GO:0016324; GO:0016887; GO:0019829; GO:0030165; GO:0030501; GO:0032591; GO:0032809; GO:0034220; GO:0043231; GO:0045121; GO:0046872; GO:0051480; GO:0051481; GO:0051928; GO:…	R-HSA-418359;R-HSA-5578775;R-HSA-936837;	hsa:490;	19.4988	19.737	19.5974	19.1513	19.4126	19.4372	19.4571	19.0362	19.1609	19.1297	19.0392	18.9489	18.8674	19.1391
PLEKHA6_Q9Y2H5	0.538889	1.57882	1.3059	0.142516	0.877059	0.322822	0.670209	-0.785843	-0.19999	0.0623835	-0.37674	-1.07917	-2	-1.0144	PLEKHA6	Pleckstrin homology domain-containing family A member 6	Q9Y2H5	1.0214	0.000149923	0.0108273	-0.422695	sp|Q9Y2H5|PKHA6_HUMAN Pleckstrin homology domain-containing family A member 6 OS=Homo sapiens OX=9606 GN=PLEKHA6 PE=1 SV=4								R-HSA-1660499;	hsa:22874;	20.109	20.392	20.3177	20.0011	20.201	20.0502	20.1447	19.7485	19.9079	19.9793	19.8598	19.6686	19.4065	19.6863
TAOK3_Q9H2K8	-0.260837	1.1166	0.691004	0.769623	0.592669	1.24265	1.64705	-1.21409	-1.0311	-1.40289	-1.03873	-0.395445	-0.28813	-0.428384	TAOK3	Serine/threonine-protein kinase TAO3	Q9H2K8	1.02387	0.000151027	0.0108273	-0.363606	sp|Q9H2K8|TAOK3_HUMAN Serine/threonine-protein kinase TAO3 OS=Homo sapiens OX=9606 GN=TAOK3 PE=1 SV=2	FUNCTION: Serine/threonine-protein kinase that acts as a regulator of the p38/MAPK14 stress-activated MAPK cascade and of the MAPK8/JNK cascade. Acts as an activator of the p38/MAPK14 stress-activated MAPK cascade. In response to DNA damage, involved in the G2/M transition DNA damage checkpoint by activating the p38/MAPK14 stress-activated MAPK cascade, probably by mediating phosphorylation of up…	SUBCELLULAR LOCATION: Cytoplasm {ECO:0000269|PubMed:13679851}. Cell membrane {ECO:0000269|PubMed:13679851}; Peripheral membrane protein {ECO:0000269|PubMed:13679851}. Note=Also localized to the peripheral cell membrane.		activation of protein kinase activity [GO:0032147]; cellular response to DNA damage stimulus [GO:0006974]; DNA repair [GO:0006281]; MAPK cascade [GO:0000165]; mitotic G2 DNA damage checkpoint [GO:0007095]; negative regulation of JNK cascade [GO:0046329]; neuron projection morphogenesis [GO:0048812]; positive regulation of JNK cascade [GO:0046330]; positive regulation of JUN kinase activity [GO:00…	ATP binding [GO:0005524]; protein kinase inhibitor activity [GO:0004860]; protein serine/threonine kinase activity [GO:0004674]; protein serine kinase activity [GO:0106310]; protein threonine kinase activity [GO:0106311]; transferase activity [GO:0016740]	cytoplasm [GO:0005737]; plasma membrane [GO:0005886]	GO:0000165; GO:0004674; GO:0004860; GO:0005524; GO:0005737; GO:0005886; GO:0006281; GO:0006468; GO:0006974; GO:0007095; GO:0016740; GO:0031098; GO:0032147; GO:0032874; GO:0043507; GO:0046329; GO:0046330; GO:0046777; GO:0048812; GO:0106310; GO:0106311		hsa:51347;	15.3545	15.6568	15.5633	15.5806	15.5418	15.6844	15.7732	15.1452	15.1854	15.1038	15.1837	15.3249	15.3485	15.3177
SUMF2_Q8NBJ7	0.0647281	1.48329	1.00616	1.10515	0.890574	1.14568	0.431654	-0.780166	-0.0546138	-1.12812	-0.946973	-1.14858	-0.912476	-1.1563	SUMF2	Sulfatase-modifying factor 2	Q8NBJ7	1.0215	0.000153915	0.0108273	-0.340561	sp|Q8NBJ7|SUMF2_HUMAN Inactive C-alpha-formylglycine-generating enzyme 2 OS=Homo sapiens OX=9606 GN=SUMF2 PE=1 SV=2	FUNCTION: Lacks formylglycine generating activity and is unable to convert newly synthesized inactive sulfatases to their active form. Inhibits the activation of sulfatases by SUMF1. {ECO:0000269|PubMed:12757706, ECO:0000269|PubMed:15708861, ECO:0000269|PubMed:15962010}.	SUBCELLULAR LOCATION: Endoplasmic reticulum lumen {ECO:0000269|PubMed:15708861, ECO:0000269|PubMed:15962010, ECO:0000269|PubMed:18266766}.		glycosphingolipid metabolic process [GO:0006687]; post-translational protein modification [GO:0043687]	metal ion binding [GO:0046872]	endoplasmic reticulum [GO:0005783]; endoplasmic reticulum lumen [GO:0005788]	GO:0005783; GO:0005788; GO:0006687; GO:0043687; GO:0046872	R-HSA-1660662;R-HSA-1663150;	hsa:25870;	16.0249	16.3008	16.208	16.2273	16.1855	16.2352	16.0962	15.8605	16.0017	15.7928	15.8281	15.7888	15.8348	15.7873
COL6A2_P12110	-0.0426634	0.519268	1.58121	-0.468473	0.00660695	1.41781	1.59922	-1.23359	-0.330289	0.167736	-1.2931	-0.732991	-1.25258	0.0618297	COL6A2	Collagen alpha-2(VI) chain	P12110	1.04848	0.000154164	0.0108273	-0.916375	sp|P12110|CO6A2_HUMAN Collagen alpha-2(VI) chain OS=Homo sapiens OX=9606 GN=COL6A2 PE=1 SV=4	FUNCTION: Collagen VI acts as a cell-binding protein.	SUBCELLULAR LOCATION: Secreted, extracellular space, extracellular matrix {ECO:0000269|PubMed:8305732}. Membrane {ECO:0000269|PubMed:8305732}; Peripheral membrane protein {ECO:0000269|PubMed:8305732}. Note=Recruited on membranes by CSPG4.	DISEASE: Bethlem myopathy 1 (BTHLM1) [MIM:158810]: A benign proximal myopathy characterized by early childhood onset and joint contractures most frequently affecting the elbows and ankles. {ECO:0000269|PubMed:11865138, ECO:0000269|PubMed:15689448, ECO:0000269|PubMed:17886299, ECO:0000269|PubMed:8782832}. Note=The disease is caused by variants affecting the gene represented in this entry.; DISEASE…	cell adhesion [GO:0007155]; collagen fibril organization [GO:0030199]; extracellular matrix organization [GO:0030198]; response to glucose [GO:0009749]	collagen binding [GO:0005518]; extracellular matrix structural constituent conferring tensile strength [GO:0030020]	collagen-containing extracellular matrix [GO:0062023]; collagen trimer [GO:0005581]; endoplasmic reticulum lumen [GO:0005788]; extracellular exosome [GO:0070062]; extracellular region [GO:0005576]; extracellular space [GO:0005615]; extracellular vesicle [GO:1903561]; protein-containing complex [GO:0032991]; sarcolemma [GO:0042383]	GO:0005518; GO:0005576; GO:0005581; GO:0005615; GO:0005788; GO:0007155; GO:0009749; GO:0030020; GO:0030198; GO:0030199; GO:0032991; GO:0042383; GO:0062023; GO:0070062; GO:1903561	R-HSA-1442490;R-HSA-1650814;R-HSA-186797;R-HSA-2022090;R-HSA-216083;R-HSA-3000178;R-HSA-419037;R-HSA-8948216;	hsa:1292;	19.3321	19.7228	20.4612	19.0361	19.3664	20.3476	20.4737	18.5041	19.1322	19.4784	18.4627	18.8522	18.4909	19.4048
GPC1_P35052	0.398896	2	1.68038	0.054015	0.555977	0.305745	0.0882008	-0.990409	-0.0886544	-0.243114	-0.128443	-1.4248	-1.11559	-1.10381	GPC1	Glypican-1;Secreted glypican-1	P35052	1.02896	0.00015424	0.0108273	-0.547943	sp|P35052|GPC1_HUMAN Glypican-1 OS=Homo sapiens OX=9606 GN=GPC1 PE=1 SV=2	FUNCTION: Cell surface proteoglycan that bears heparan sulfate. Binds, via the heparan sulfate side chains, alpha-4 (V) collagen and participates in Schwann cell myelination (By similarity). May act as a catalyst in increasing the rate of conversion of prion protein PRPN(C) to PRNP(Sc) via associating (via the heparan sulfate side chains) with both forms of PRPN, targeting them to lipid rafts and…	SUBCELLULAR LOCATION: Cell membrane; Lipid-anchor, GPI-anchor; Extracellular side. Endosome. Note=S-nitrosylated form recycled in endosomes. Localizes to CAV1-containing vesicles close to the cell surface. Cleavage of heparan sulfate side chains takes place mainly in late endosomes. Associates with both forms of PRNP in lipid rafts. Colocalizes with APP in perinuclear compartments and with CP in …	DISEASE: Note=Associates (via the heparan sulfate side chains) with fibrillar APP amyloid-beta peptides in primitive and classic amyloid plaques and may be involved in the deposition of these senile plaques in the Alzheimer disease (AD) brain (PubMed:15084524). {ECO:0000269|PubMed:15084524}.; DISEASE: Note=Misprocessing of GPC1 is found in fibroblasts of patients with Niemann-Pick Type C1 disease…	axon guidance [GO:0007411]; cell migration [GO:0016477]; glycosaminoglycan biosynthetic process [GO:0006024]; glycosaminoglycan catabolic process [GO:0006027]; heparan sulfate proteoglycan catabolic process [GO:0030200]; leukocyte migration [GO:0050900]; myelin assembly [GO:0032288]; negative regulation of fibroblast growth factor receptor signaling pathway [GO:0040037]; positive regulation of sk…	copper ion binding [GO:0005507]; fibroblast growth factor binding [GO:0017134]; laminin binding [GO:0043236]	anchored component of plasma membrane [GO:0046658]; cell surface [GO:0009986]; collagen-containing extracellular matrix [GO:0062023]; cytosol [GO:0005829]; endosome [GO:0005768]; extracellular exosome [GO:0070062]; extracellular matrix [GO:0031012]; extracellular region [GO:0005576]; extracellular space [GO:0005615]; Golgi lumen [GO:0005796]; intrinsic component of plasma membrane [GO:0031226]; l…	GO:0001523; GO:0005507; GO:0005576; GO:0005615; GO:0005654; GO:0005768; GO:0005796; GO:0005829; GO:0005886; GO:0006024; GO:0006027; GO:0007411; GO:0009986; GO:0014037; GO:0016477; GO:0017134; GO:0030200; GO:0031012; GO:0031226; GO:0032288; GO:0040037; GO:0043202; GO:0043236; GO:0045121; GO:0045202; GO:0046658; GO:0050900; GO:0062023; GO:0070062; GO:1905475; GO:2001016	R-HSA-1971475;R-HSA-2022928;R-HSA-2024096;R-HSA-202733;R-HSA-3560783;R-HSA-3560801;R-HSA-3656237;R-HSA-3656253;R-HSA-376176;R-HSA-4420332;R-HSA-975634;	hsa:2817;	19.3423	19.9494	19.8247	19.2125	19.4014	19.3072	19.2253	18.8193	19.1588	19.1006	19.1438	18.6558	18.7722	18.7767
COL1A2_P08123	0.318948	0.577168	2	-0.8996	-0.509358	1.14541	1.25956	-0.79346	-0.357055	0.289525	-1.17979	-1.29074	-0.729479	0.131812	COL1A2	Collagen alpha-2(I) chain	P08123	1.03741	0.000156697	0.0108273	-0.711479	sp|P08123|CO1A2_HUMAN Collagen alpha-2(I) chain OS=Homo sapiens OX=9606 GN=COL1A2 PE=1 SV=7	FUNCTION: Type I collagen is a member of group I collagen (fibrillar forming collagen).	SUBCELLULAR LOCATION: Secreted, extracellular space, extracellular matrix {ECO:0000255|PROSITE-ProRule:PRU00793}.	DISEASE: Ehlers-Danlos syndrome, arthrochalasia type, 2 (EDSARTH2) [MIM:617821]: A form of Ehlers-Danlos syndrome, a connective tissue disorder characterized by hyperextensible skin, atrophic cutaneous scars due to tissue fragility and joint hyperlaxity. EDSARTH2 is an autosomal dominant condition characterized by frequent congenital hip dislocation and extreme joint laxity with recurrent joint s…	blood coagulation [GO:0007596]; blood vessel development [GO:0001568]; bone mineralization [GO:0030282]; cellular response to amino acid stimulus [GO:0071230]; collagen fibril organization [GO:0030199]; collagen metabolic process [GO:0032963]; cytokine-mediated signaling pathway [GO:0019221]; extracellular matrix assembly [GO:0085029]; extracellular matrix organization [GO:0030198]; leukocyte mig…	extracellular matrix structural constituent [GO:0005201]; extracellular matrix structural constituent conferring tensile strength [GO:0030020]; identical protein binding [GO:0042802]; metal ion binding [GO:0046872]; platelet-derived growth factor binding [GO:0048407]; protease binding [GO:0002020]; protein-macromolecule adaptor activity [GO:0030674]; SMAD binding [GO:0046332]	collagen-containing extracellular matrix [GO:0062023]; collagen type I trimer [GO:0005584]; endoplasmic reticulum [GO:0005783]; endoplasmic reticulum lumen [GO:0005788]; extracellular exosome [GO:0070062]; extracellular matrix [GO:0031012]; extracellular region [GO:0005576]; extracellular space [GO:0005615]	GO:0001501; GO:0001568; GO:0002020; GO:0005201; GO:0005576; GO:0005584; GO:0005615; GO:0005783; GO:0005788; GO:0007179; GO:0007266; GO:0007596; GO:0008217; GO:0019221; GO:0030020; GO:0030168; GO:0030198; GO:0030199; GO:0030282; GO:0030674; GO:0031012; GO:0032963; GO:0042476; GO:0042802; GO:0043589; GO:0046332; GO:0046872; GO:0048407; GO:0050776; GO:0050900; GO:0062023; GO:0070062; GO:0070208; GO:…	R-HSA-114604;R-HSA-1442490;R-HSA-1474244;R-HSA-1650814;R-HSA-198933;R-HSA-2022090;R-HSA-202733;R-HSA-216083;R-HSA-2214320;R-HSA-2243919;R-HSA-3000170;R-HSA-3000171;R-HSA-3000178;R-HSA-3000480;R-HSA-430116;R-HSA-6785807;R-HSA-75892;R-HSA-76009;R-HSA-8874081;R-HSA-8948216;	hsa:1278;	19.5759	19.7396	20.6648	18.8037	19.051	20.0997	20.1721	18.8709	19.1475	19.5573	18.6261	18.5558	18.9115	19.4573
PRKCDBP_Q969G5	-0.710407	1.41152	1.49754	0.16393	0.323106	0.522917	1.3588	-1.76875	-0.859486	0.476585	-0.189514	-0.743864	-1.07806	-0.404321	PRKCDBP	Protein kinase C delta-binding protein	Q969G5	1.03784	0.000158065	0.0108273	-0.635464	sp|Q969G5|CAVN3_HUMAN Caveolae-associated protein 3 OS=Homo sapiens OX=9606 GN=CAVIN3 PE=1 SV=3	FUNCTION: Regulates the traffic and/or budding of caveolae (PubMed:19262564). Plays a role in caveola formation in a tissue-specific manner. Required for the formation of caveolae in smooth muscle but not in the lung and heart endothelial cells. Regulates the equilibrium between cell surface-associated and cell surface-dissociated caveolae by promoting the rapid release of caveolae from the cell …	SUBCELLULAR LOCATION: Cytoplasm {ECO:0000250|UniProtKB:Q91VJ2}. Membrane, caveola {ECO:0000269|PubMed:19262564}. Cytoplasm, cytosol {ECO:0000250|UniProtKB:Q91VJ2}. Note=Localizes in the caveolae in a caveolin-dependent manner. {ECO:0000269|PubMed:19262564}.		circadian regulation of gene expression [GO:0032922]	protein kinase C binding [GO:0005080]	caveola [GO:0005901]; cytoplasm [GO:0005737]; cytosol [GO:0005829]; protein-containing complex [GO:0032991]	GO:0005080; GO:0005737; GO:0005829; GO:0005901; GO:0032922; GO:0032991		hsa:112464;	16.766	17.7993	17.8412	17.1917	17.2693	17.3666	17.7736	16.2506	16.6934	17.344	17.0196	16.7497	16.5869	16.915
PITPNM1_O00562	-0.59562	-0.801613	-0.194085	-1.74446	-1.29628	-0.196321	0.00738942	0.531662	0.898839	2	-0.294185	0.173923	0.43464	0.804789	PITPNM1	Membrane-associated phosphatidylinositol transfer protein 1	O00562	1.03201	0.000159329	0.0108273	0.520488	sp|O00562|PITM1_HUMAN Membrane-associated phosphatidylinositol transfer protein 1 OS=Homo sapiens OX=9606 GN=PITPNM1 PE=1 SV=4	FUNCTION: Catalyzes the transfer of phosphatidylinositol (PI) between membranes (PubMed:22822086, PubMed:10531358). Binds PI, phosphatidylcholine (PC) and phosphatidic acid (PA) with the binding affinity order of PI > PA > PC (PubMed:22822086). Regulates RHOA activity, and plays a role in cytoskeleton remodeling (PubMed:11909959). Necessary for normal completion of cytokinesis (PubMed:15125835). …	SUBCELLULAR LOCATION: Cytoplasm. Golgi apparatus, Golgi stack membrane {ECO:0000269|PubMed:12225667}; Peripheral membrane protein. Endoplasmic reticulum membrane {ECO:0000269|PubMed:12225667}; Peripheral membrane protein. Lipid droplet {ECO:0000269|PubMed:12225667}. Cleavage furrow {ECO:0000269|PubMed:15125835}. Midbody {ECO:0000269|PubMed:15125835}. Note=Peripheral membrane protein associated wi…		brain development [GO:0007420]; lipid metabolic process [GO:0006629]; phosphatidylinositol biosynthetic process [GO:0006661]; phospholipid transport [GO:0015914]; phototransduction [GO:0007602]; protein transport [GO:0015031]	calcium ion binding [GO:0005509]; phosphatidic acid binding [GO:0070300]; phosphatidylcholine binding [GO:0031210]; phosphatidylcholine transporter activity [GO:0008525]; phosphatidylinositol binding [GO:0035091]; phosphatidylinositol transfer activity [GO:0008526]; receptor tyrosine kinase binding [GO:0030971]	cell body [GO:0044297]; cleavage furrow [GO:0032154]; cytoplasm [GO:0005737]; cytosol [GO:0005829]; endoplasmic reticulum membrane [GO:0005789]; Golgi cisterna membrane [GO:0032580]; intracellular membrane-bounded organelle [GO:0043231]; lipid droplet [GO:0005811]; membrane [GO:0016020]; midbody [GO:0030496]	GO:0005509; GO:0005737; GO:0005789; GO:0005811; GO:0005829; GO:0006629; GO:0006661; GO:0007420; GO:0007602; GO:0008525; GO:0008526; GO:0015031; GO:0015914; GO:0016020; GO:0030496; GO:0030971; GO:0031210; GO:0032154; GO:0032580; GO:0035091; GO:0043231; GO:0044297; GO:0070300	R-HSA-1483226;	hsa:9600;	16.2959	16.2181	16.4477	15.8618	16.0312	16.4468	16.5238	16.7219	16.8606	17.3793	16.4098	16.5867	16.6852	16.8251
ARID3B_Q8IVW6	0.519238	2	0.538803	0.545859	0.793663	-0.239324	0.105017	0.225023	0.781454	-0.32045	-0.915913	-1.09523	-1.84264	-1.10292	ARID3B	AT-rich interactive domain-containing protein 3B	Q8IVW6	1.02799	0.000159781	0.0108273	-0.483137	sp|Q8IVW6|ARI3B_HUMAN AT-rich interactive domain-containing protein 3B OS=Homo sapiens OX=9606 GN=ARID3B PE=1 SV=2	FUNCTION: Transcription factor which may be involved in neuroblastoma growth and malignant transformation. Favors nuclear targeting of ARID3A. {ECO:0000269|PubMed:16951138, ECO:0000269|PubMed:17400556}.	SUBCELLULAR LOCATION: Nucleus {ECO:0000255|PROSITE-ProRule:PRU00355, ECO:0000269|PubMed:10446990, ECO:0000269|PubMed:17400556}.		positive regulation of transcription by RNA polymerase II [GO:0045944]; regulation of transcription by RNA polymerase II [GO:0006357]	DNA binding [GO:0003677]	nucleoplasm [GO:0005654]; nucleus [GO:0005634]	GO:0003677; GO:0005634; GO:0005654; GO:0006357; GO:0045944		hsa:10620;	17.7097	18.299	17.7175	17.7202	17.8184	17.4094	17.5457	17.5932	17.8135	17.3772	17.1415	17.0705	16.7745	17.0674
LAMC1_P11047	-0.0379464	1.29336	1.24237	0.0726852	0.277094	1.53207	1.37153	-0.756023	-0.792091	-1.06125	-0.187955	-1.30671	-0.977416	-0.669721	LAMC1	Laminin subunit gamma-1	P11047	1.04373	0.000160927	0.0108273	-0.980651	sp|P11047|LAMC1_HUMAN Laminin subunit gamma-1 OS=Homo sapiens OX=9606 GN=LAMC1 PE=1 SV=3	FUNCTION: Binding to cells via a high affinity receptor, laminin is thought to mediate the attachment, migration and organization of cells into tissues during embryonic development by interacting with other extracellular matrix components.	SUBCELLULAR LOCATION: Secreted, extracellular space, extracellular matrix, basement membrane.		animal organ morphogenesis [GO:0009887]; cell adhesion [GO:0007155]; cell migration [GO:0016477]; cellular protein metabolic process [GO:0044267]; endoderm development [GO:0007492]; extracellular matrix disassembly [GO:0022617]; extracellular matrix organization [GO:0030198]; hemidesmosome assembly [GO:0031581]; maintenance of blood-brain barrier [GO:0035633]; positive regulation of epithelial ce…	extracellular matrix structural constituent [GO:0005201]	basement membrane [GO:0005604]; collagen-containing extracellular matrix [GO:0062023]; endoplasmic reticulum lumen [GO:0005788]; extracellular exosome [GO:0070062]; extracellular region [GO:0005576]; extracellular space [GO:0005615]; laminin-10 complex [GO:0043259]; laminin-11 complex [GO:0043260]; laminin-1 complex [GO:0005606]	GO:0005201; GO:0005576; GO:0005604; GO:0005606; GO:0005615; GO:0005788; GO:0007155; GO:0007492; GO:0009887; GO:0009888; GO:0016477; GO:0022617; GO:0030198; GO:0031581; GO:0034446; GO:0035633; GO:0043259; GO:0043260; GO:0043687; GO:0044267; GO:0050679; GO:0062023; GO:0065003; GO:0070062	R-HSA-1474228;R-HSA-3000157;R-HSA-3000171;R-HSA-3000178;R-HSA-373760;R-HSA-381426;R-HSA-8874081;R-HSA-8957275;R-HSA-9619665;	hsa:3915;	22.8917	23.6862	23.6558	22.9577	23.0797	23.8287	23.7328	22.4631	22.4416	22.281	22.8021	22.1345	22.331	22.5146
DYRK2_Q92630	-0.43099	-0.0757189	-1.16706	-0.595647	-0.47715	-1.60543	-1.27327	0.904826	1.09066	1.9409	0.362993	0.674595	0.539061	0.11224	DYRK2	Dual specificity tyrosine-phosphorylation-regulated kinase 2	Q92630	1.04708	0.000161599	0.0108273	0.610478	sp|Q92630|DYRK2_HUMAN Dual specificity tyrosine-phosphorylation-regulated kinase 2 OS=Homo sapiens OX=9606 GN=DYRK2 PE=1 SV=3	FUNCTION: Serine/threonine-protein kinase involved in the regulation of the mitotic cell cycle, cell proliferation, apoptosis, organization of the cytoskeleton and neurite outgrowth. Functions in part via its role in ubiquitin-dependent proteasomal protein degradation. Functions downstream of ATM and phosphorylates p53/TP53 at 'Ser-46', and thereby contributes to the induction of apoptosis in res…	SUBCELLULAR LOCATION: Cytoplasm. Nucleus. Note=Translocates into the nucleus following DNA damage.		cellular response to DNA damage stimulus [GO:0006974]; intrinsic apoptotic signaling pathway in response to DNA damage by p53 class mediator [GO:0042771]; negative regulation of calcineurin-NFAT signaling cascade [GO:0070885]; peptidyl-serine phosphorylation [GO:0018105]; peptidyl-threonine phosphorylation [GO:0018107]; positive regulation of glycogen biosynthetic process [GO:0045725]; protein ph…	ATP binding [GO:0005524]; magnesium ion binding [GO:0000287]; manganese ion binding [GO:0030145]; protein serine/threonine/tyrosine kinase activity [GO:0004712]; protein serine/threonine kinase activity [GO:0004674]; protein serine kinase activity [GO:0106310]; protein threonine kinase activity [GO:0106311]; protein tyrosine kinase activity [GO:0004713]; transmembrane receptor protein tyrosine ki…	cytoplasm [GO:0005737]; cytoskeleton [GO:0005856]; cytosol [GO:0005829]; nucleoplasm [GO:0005654]; nucleus [GO:0005634]; ribonucleoprotein complex [GO:1990904]; ubiquitin ligase complex [GO:0000151]	GO:0000151; GO:0000287; GO:0004674; GO:0004712; GO:0004713; GO:0004714; GO:0005524; GO:0005634; GO:0005654; GO:0005737; GO:0005829; GO:0005856; GO:0006468; GO:0006974; GO:0007224; GO:0018105; GO:0018107; GO:0030145; GO:0042771; GO:0045725; GO:0070885; GO:0106310; GO:0106311; GO:1901796; GO:1990904	R-HSA-6804756;	hsa:8445;	13.1085	13.2435	12.8289	13.046	13.091	12.6624	12.7886	13.6159	13.6865	14.0095	13.4101	13.5285	13.477	13.3149
ATP1B1_P05026	0.25549	1.0627	1.05872	1.11471	0.965802	0.39207	0.759855	-1.0594	-1.11852	-1.65174	0.705926	-0.947694	-0.989595	-0.548323	ATP1B1	Sodium/potassium-transporting ATPase subunit beta-1	P05026	1.02762	0.000161766	0.0108273	-0.567223	sp|P05026|AT1B1_HUMAN Sodium/potassium-transporting ATPase subunit beta-1 OS=Homo sapiens OX=9606 GN=ATP1B1 PE=1 SV=1	FUNCTION: This is the non-catalytic component of the active enzyme, which catalyzes the hydrolysis of ATP coupled with the exchange of Na(+) and K(+) ions across the plasma membrane. The beta subunit regulates, through assembly of alpha/beta heterodimers, the number of sodium pumps transported to the plasma membrane. {ECO:0000269|PubMed:19694409}.; FUNCTION: Involved in cell adhesion and establis…	SUBCELLULAR LOCATION: Cell membrane {ECO:0000255}; Single-pass type II membrane protein {ECO:0000255}. Apical cell membrane {ECO:0000250|UniProtKB:P07340}; Single-pass type II membrane protein {ECO:0000255}. Cell membrane, sarcolemma {ECO:0000250|UniProtKB:P14094}. Note=Colocalizes with OBSCN at the intercalated disk and sarcolemma in cardiomyocytes. Localizes in long striations at the level of Z…		ATP metabolic process [GO:0046034]; cardiac muscle contraction [GO:0060048]; cation transmembrane transport [GO:0098655]; cell adhesion [GO:0007155]; cell communication by electrical coupling involved in cardiac conduction [GO:0086064]; cellular calcium ion homeostasis [GO:0006874]; cellular potassium ion homeostasis [GO:0030007]; cellular sodium ion homeostasis [GO:0006883]; establishment or mai…	ATPase activator activity [GO:0001671]; ATPase binding [GO:0051117]; MHC class II protein complex binding [GO:0023026]; protein C-terminus binding [GO:0008022]; protein heterodimerization activity [GO:0046982]; protein kinase binding [GO:0019901]; protein-macromolecule adaptor activity [GO:0030674]; P-type sodium:potassium-exchanging transporter activity [GO:0005391]	apical plasma membrane [GO:0016324]; basolateral plasma membrane [GO:0016323]; caveola [GO:0005901]; extracellular exosome [GO:0070062]; extracellular vesicle [GO:1903561]; intercalated disc [GO:0014704]; lateral plasma membrane [GO:0016328]; membrane [GO:0016020]; organelle membrane [GO:0031090]; plasma membrane [GO:0005886]; sarcolemma [GO:0042383]; sodium:potassium-exchanging ATPase complex [G…	GO:0001666; GO:0001671; GO:0005391; GO:0005886; GO:0005890; GO:0005901; GO:0006874; GO:0006883; GO:0007155; GO:0008022; GO:0010248; GO:0010468; GO:0010882; GO:0014704; GO:0016020; GO:0016323; GO:0016324; GO:0016328; GO:0019901; GO:0023026; GO:0030007; GO:0030315; GO:0030674; GO:0031090; GO:0032781; GO:0034220; GO:0035725; GO:0036126; GO:0036376; GO:0042383; GO:0044861; GO:0046034; GO:0046982; GO:…	R-HSA-210991;R-HSA-5578775;R-HSA-936837;R-HSA-9679191;	hsa:481;	20.9123	21.1979	21.1965	21.2164	21.1636	20.9606	21.0908	20.4469	20.426	20.2372	21.0717	20.4864	20.4716	20.6278
GNAZ_P19086	0.0270803	0.425211	2	0.371719	1.00607	0.415989	1.11535	-0.377884	-0.860229	-0.570065	-1.4427	-1.08019	-0.643442	-0.62174	GNAZ	Guanine nucleotide-binding protein G(z) subunit alpha	P19086	1.0468	0.000161808	0.0108273	-0.649227	sp|P19086|GNAZ_HUMAN Guanine nucleotide-binding protein G(z) subunit alpha OS=Homo sapiens OX=9606 GN=GNAZ PE=1 SV=3	FUNCTION: Guanine nucleotide-binding proteins (G proteins) are involved as modulators or transducers in various transmembrane signaling systems.	SUBCELLULAR LOCATION: Membrane; Lipid-anchor.		adenylate cyclase-inhibiting G protein-coupled receptor signaling pathway [GO:0007193]; adenylate cyclase-modulating G protein-coupled receptor signaling pathway [GO:0007188]; G protein-coupled receptor signaling pathway [GO:0007186]; protein folding [GO:0006457]	G-protein beta/gamma-subunit complex binding [GO:0031683]; G protein-coupled receptor binding [GO:0001664]; G protein-coupled serotonin receptor binding [GO:0031821]; GTPase activity [GO:0003924]; GTP binding [GO:0005525]; metal ion binding [GO:0046872]	cytosol [GO:0005829]; endoplasmic reticulum [GO:0005783]; heterotrimeric G-protein complex [GO:0005834]; nuclear envelope [GO:0005635]; plasma membrane [GO:0005886]	GO:0001664; GO:0003924; GO:0005525; GO:0005635; GO:0005783; GO:0005829; GO:0005834; GO:0005886; GO:0006457; GO:0007186; GO:0007188; GO:0007193; GO:0031683; GO:0031821; GO:0046872	R-HSA-112043;R-HSA-202040;R-HSA-418555;R-HSA-418594;R-HSA-418597;R-HSA-6814122;R-HSA-9660821;	hsa:2781;	14.2085	14.3702	15.105	14.3485	14.606	14.3664	14.6504	14.0441	13.8483	13.9661	13.6117	13.7589	13.9363	13.9451
COL23A1_Q86Y22	0.397952	1.93452	0.97265	-0.146651	1.24697	0.320941	0.985625	-0.433632	-0.614215	-1.28242	-0.344289	-0.769738	-1.0626	-1.20511	COL23A1	Collagen alpha-1(XXIII) chain	Q86Y22	1.0824	0.000168222	0.0110808	-1.20235	sp|Q86Y22|CONA1_HUMAN Collagen alpha-1(XXIII) chain OS=Homo sapiens OX=9606 GN=COL23A1 PE=1 SV=1		SUBCELLULAR LOCATION: Cell membrane {ECO:0000250}; Single-pass type II membrane protein {ECO:0000250}; Extracellular side {ECO:0000250}.		collagen fibril organization [GO:0030199]; extracellular matrix organization [GO:0030198]	extracellular matrix structural constituent [GO:0005201]	collagen-containing extracellular matrix [GO:0062023]; collagen trimer [GO:0005581]; endoplasmic reticulum lumen [GO:0005788]; extracellular matrix [GO:0031012]; extracellular space [GO:0005615]; integral component of membrane [GO:0016021]; plasma membrane [GO:0005886]	GO:0005201; GO:0005581; GO:0005615; GO:0005788; GO:0005886; GO:0016021; GO:0030198; GO:0030199; GO:0031012; GO:0062023	R-HSA-1442490;R-HSA-1650814;R-HSA-216083;R-HSA-8948216;	hsa:91522;	15.4861	16.6181	15.9095	15.0849	16.1116	15.4294	15.919	14.8734	14.7404	14.2481	14.9393	14.6258	14.4101	14.3051
PARD3B_Q8TEW8	0.413953	1.0544	0.701421	1.48082	1.3661	0.583907	0.480492	-1.13495	-0.967846	-0.570526	-0.214397	-1.63971	-0.550839	-1.00282	PARD3B	Partitioning defective 3 homolog B	Q8TEW8	1.0251	0.000169924	0.0110808	-0.390508	sp|Q8TEW8|PAR3L_HUMAN Partitioning defective 3 homolog B OS=Homo sapiens OX=9606 GN=PARD3B PE=1 SV=2	FUNCTION: Putative adapter protein involved in asymmetrical cell division and cell polarization processes. May play a role in the formation of epithelial tight junctions.	SUBCELLULAR LOCATION: Endomembrane system. Cell junction. Cell junction, tight junction. Note=Partially localized along the cell-cell contact region. Colocalizes with TJP1 to epithelial tight junctions.		cell adhesion [GO:0007155]; cell cycle [GO:0007049]; cell division [GO:0051301]; establishment of cell polarity [GO:0030010]; establishment of centrosome localization [GO:0051660]; establishment or maintenance of epithelial cell apical/basal polarity [GO:0045197]; microtubule cytoskeleton organization [GO:0000226]; protein localization [GO:0008104]	phosphatidylinositol binding [GO:0035091]	adherens junction [GO:0005912]; apical junction complex [GO:0043296]; apical plasma membrane [GO:0016324]; bicellular tight junction [GO:0005923]; cell cortex [GO:0005938]; cell junction [GO:0030054]; endomembrane system [GO:0012505]; protein-containing complex [GO:0032991]	GO:0000226; GO:0005912; GO:0005923; GO:0005938; GO:0007049; GO:0007155; GO:0008104; GO:0012505; GO:0016324; GO:0030010; GO:0030054; GO:0032991; GO:0035091; GO:0043296; GO:0045197; GO:0051301; GO:0051660		hsa:117583;	15.8455	15.9895	15.9101	16.0853	16.0595	15.8837	15.8605	15.4974	15.5349	15.6242	15.7043	15.3839	15.6287	15.5271
PODN_Q7Z5L7	0.213184	1.83855	1.46065	0.129603	-0.0353836	0.929357	0.0877363	-0.983422	-0.0483876	0.566437	-1.11422	-1.46088	-1.35378	-0.229438	PODN	Podocan	Q7Z5L7	1.052	0.000170334	0.0110808	-0.642966	sp|Q7Z5L7|PODN_HUMAN Podocan OS=Homo sapiens OX=9606 GN=PODN PE=1 SV=2	FUNCTION: Negatively regulates cell proliferation and cell migration. {ECO:0000269|PubMed:15063725}.	SUBCELLULAR LOCATION: [Isoform 1]: Secreted, extracellular space, extracellular matrix.; SUBCELLULAR LOCATION: [Isoform 2]: Cytoplasm {ECO:0000305}.; SUBCELLULAR LOCATION: [Isoform 3]: Cytoplasm {ECO:0000305}.; SUBCELLULAR LOCATION: [Isoform 4]: Cytoplasm {ECO:0000305}.		negative regulation of cell migration [GO:0030336]; negative regulation of cell population proliferation [GO:0008285]	collagen binding [GO:0005518]	collagen-containing extracellular matrix [GO:0062023]; cytoplasm [GO:0005737]; extracellular space [GO:0005615]	GO:0005518; GO:0005615; GO:0005737; GO:0008285; GO:0030336; GO:0062023		hsa:127435;	12.7901	13.5812	13.3973	12.7495	12.6692	13.1387	12.7291	12.2077	12.6628	12.9621	12.1441	11.9754	12.0275	12.5747
VSTM2L_Q96N03	0.146341	0.485269	0.389234	2	1.68733	-0.0382151	0.108173	-0.351314	-0.915374	-1.51945	0.0372501	-0.601863	-0.952221	-0.656797	VSTM2L	V-set and transmembrane domain-containing protein 2-like protein	Q96N03	1.04312	0.000172045	0.0110808	-0.757401	sp|Q96N03|VTM2L_HUMAN V-set and transmembrane domain-containing protein 2-like protein OS=Homo sapiens OX=9606 GN=VSTM2L PE=1 SV=1				axon guidance [GO:0007411]; dendrite self-avoidance [GO:0070593]; homophilic cell adhesion via plasma membrane adhesion molecules [GO:0007156]; negative regulation of neuron apoptotic process [GO:0043524]	cell-cell adhesion mediator activity [GO:0098632]	axon [GO:0030424]; cytoplasm [GO:0005737]; extracellular region [GO:0005576]; plasma membrane [GO:0005886]	GO:0005576; GO:0005737; GO:0005886; GO:0007156; GO:0007411; GO:0030424; GO:0043524; GO:0070593; GO:0098632		hsa:128434;	18.0224	18.2035	18.1522	19.1102	18.846	17.9237	18.002	17.7564	17.4549	17.132	17.9641	17.6225	17.4352	17.5931
ADAMTSL4_Q6UY14	-0.154598	1.96078	1.49007	-0.881435	-0.0637961	0.845165	1.02903	-1.14283	-0.0859884	0.227297	-1.10618	-0.896065	-0.941851	-0.279606	ADAMTSL4	ADAMTS-like protein 4	Q6UY14	1.03882	0.000172673	0.0110808	-0.746285	sp|Q6UY14|ATL4_HUMAN ADAMTS-like protein 4 OS=Homo sapiens OX=9606 GN=ADAMTSL4 PE=1 SV=2	FUNCTION: Positive regulation of apoptosis. May facilitate FBN1 microfibril biogenesis. {ECO:0000269|PubMed:16364318, ECO:0000269|PubMed:21989719}.	SUBCELLULAR LOCATION: Secreted, extracellular space, extracellular matrix {ECO:0000269|PubMed:21989719}. Note=Colocalizes with FMN1 microfibrils in the eye ECM.	DISEASE: Ectopia lentis 2, isolated, autosomal recessive (ECTOL2) [MIM:225100]: An ocular abnormality characterized by partial or complete displacement of the lens from its space resulting from defective zonule formation. {ECO:0000269|PubMed:19200529}. Note=The disease is caused by variants affecting the gene represented in this entry.; DISEASE: Ectopia lentis et pupillae (ECTOLP) [MIM:225200]: A…	apoptotic process [GO:0006915]; epithelial cell development [GO:0002064]; extracellular matrix organization [GO:0030198]; positive regulation of apoptotic process [GO:0043065]	identical protein binding [GO:0042802]; metalloendopeptidase activity [GO:0004222]; protease binding [GO:0002020]	collagen-containing extracellular matrix [GO:0062023]; endoplasmic reticulum lumen [GO:0005788]; extracellular matrix [GO:0031012]; extracellular region [GO:0005576]; interstitial matrix [GO:0005614]	GO:0002020; GO:0002064; GO:0004222; GO:0005576; GO:0005614; GO:0005788; GO:0006915; GO:0030198; GO:0031012; GO:0042802; GO:0043065; GO:0062023	R-HSA-5083635;R-HSA-5173214;	hsa:54507;	19.5006	20.8083	20.5174	19.0513	19.5568	20.1187	20.2323	18.8897	19.543	19.7367	18.9124	19.0423	19.014	19.4234
EPB41L3_Q9Y2J2	0.0376514	0.742421	0.554202	1.6611	1.41359	0.488306	0.665597	-1.35992	-1.23961	-0.843174	0.389319	-1.13091	-1.02362	-0.354961	EPB41L3	Band 4.1-like protein 3;Band 4.1-like protein 3, N-terminally processed	Q9Y2J2	1.01652	0.000179912	0.0114515	-0.357645	sp|Q9Y2J2|E41L3_HUMAN Band 4.1-like protein 3 OS=Homo sapiens OX=9606 GN=EPB41L3 PE=1 SV=2	FUNCTION: Tumor suppressor that inhibits cell proliferation and promotes apoptosis. Modulates the activity of protein arginine N-methyltransferases, including PRMT3 and PRMT5. {ECO:0000269|PubMed:15334060, ECO:0000269|PubMed:15737618, ECO:0000269|PubMed:16420693, ECO:0000269|PubMed:9892180}.	SUBCELLULAR LOCATION: Cytoplasm, cytoskeleton {ECO:0000250}. Cell junction {ECO:0000269|PubMed:9892180}. Cell membrane {ECO:0000269|PubMed:9892180}; Peripheral membrane protein {ECO:0000269|PubMed:9892180}; Cytoplasmic side {ECO:0000269|PubMed:9892180}. Cytoplasm {ECO:0000269|PubMed:9892180}. Note=Detected in the cytoplasm of actively dividing cells.		actomyosin structure organization [GO:0031032]; apoptotic process [GO:0006915]; cortical actin cytoskeleton organization [GO:0030866]; cortical cytoskeleton organization [GO:0030865]; myelin maintenance [GO:0043217]; neuron projection morphogenesis [GO:0048812]; paranodal junction assembly [GO:0030913]; protein localization to juxtaparanode region of axon [GO:0071205]; protein localization to par…	actin binding [GO:0003779]; cytoskeletal protein-membrane anchor activity [GO:0106006]; structural constituent of cytoskeleton [GO:0005200]	cell-cell junction [GO:0005911]; cell junction [GO:0030054]; cytoskeleton [GO:0005856]; cytosol [GO:0005829]; juxtaparanode region of axon [GO:0044224]; paranode region of axon [GO:0033270]; plasma membrane [GO:0005886]	GO:0001558; GO:0002175; GO:0003779; GO:0005200; GO:0005829; GO:0005856; GO:0005886; GO:0005911; GO:0006915; GO:0008360; GO:0030054; GO:0030865; GO:0030866; GO:0030913; GO:0031032; GO:0033270; GO:0043217; GO:0044224; GO:0048812; GO:0071205; GO:0072659; GO:0106006	R-HSA-6794361;	hsa:23136;	21.8396	21.9982	21.9559	22.2049	22.1493	21.941	21.9809	21.5252	21.5522	21.6414	21.9188	21.5767	21.6008	21.7513
COL4A6_Q14031	0.0625437	0.560604	0.329838	-0.331609	-0.0201716	2	1.73019	-0.95477	-0.664392	-1.21207	-0.61024	-1.22712	-0.367941	0.65454	COL4A6	Collagen alpha-6(IV) chain	Q14031	1.04588	0.000183263	0.0115707	-0.806767	sp|Q14031|CO4A6_HUMAN Collagen alpha-6(IV) chain OS=Homo sapiens OX=9606 GN=COL4A6 PE=1 SV=3	FUNCTION: Type IV collagen is the major structural component of glomerular basement membranes (GBM), forming a 'chicken-wire' meshwork together with laminins, proteoglycans and entactin/nidogen.	SUBCELLULAR LOCATION: Secreted, extracellular space, extracellular matrix, basement membrane.	DISEASE: Note=Deletions covering the N-terminal regions of COL4A5 and COL4A6, which are localized in a head-to-head manner, are found in the chromosome Xq22.3 centromeric deletion syndrome. This results in a phenotype with features of diffuse leiomyomatosis and Alport syndrome (DL-ATS).; DISEASE: Deafness, X-linked, 6 (DFNX6) [MIM:300914]: A non-syndromic form of sensorineural hearing loss with p…	cell adhesion [GO:0007155]; collagen-activated tyrosine kinase receptor signaling pathway [GO:0038063]; collagen fibril organization [GO:0030199]; extracellular matrix organization [GO:0030198]	extracellular matrix structural constituent [GO:0005201]; extracellular matrix structural constituent conferring tensile strength [GO:0030020]	collagen-containing extracellular matrix [GO:0062023]; collagen type IV trimer [GO:0005587]; endoplasmic reticulum lumen [GO:0005788]; extracellular matrix [GO:0031012]; extracellular region [GO:0005576]; extracellular space [GO:0005615]	GO:0005201; GO:0005576; GO:0005587; GO:0005615; GO:0005788; GO:0007155; GO:0030020; GO:0030198; GO:0030199; GO:0031012; GO:0038063; GO:0062023	R-HSA-1442490;R-HSA-1474244;R-HSA-1650814;R-HSA-2022090;R-HSA-216083;R-HSA-2214320;R-HSA-2243919;R-HSA-3000157;R-HSA-3000171;R-HSA-3000178;R-HSA-8948216;	hsa:1288;	18.0288	18.3498	18.2011	17.7748	17.9755	19.3099	19.1034	17.3733	17.5604	17.2075	17.5953	17.1978	17.7514	18.4103
LIN28B_Q6ZN17	0.249277	0.407928	1.5478	0.498914	0.723949	1.16839	1.28662	-1.09608	-1.35202	-1.56253	-0.393157	-0.882524	-0.295234	-0.301331	LIN28B	Protein lin-28 homolog B	Q6ZN17	1.02603	0.000195946	0.0122725	-0.424542	sp|Q6ZN17|LN28B_HUMAN Protein lin-28 homolog B OS=Homo sapiens OX=9606 GN=LIN28B PE=1 SV=1	FUNCTION: Suppressor of microRNA (miRNA) biogenesis, including that of let-7 and possibly of miR107, miR-143 and miR-200c. Binds primary let-7 transcripts (pri-let-7), including pri-let-7g and pri-let-7a-1, and sequester them in the nucleolus, away from the microprocessor complex, hence preventing their processing into mature miRNA (PubMed:22118463). Does not act on pri-miR21 (PubMed:22118463). T…	SUBCELLULAR LOCATION: Nucleus. Nucleus, nucleolus {ECO:0000269|PubMed:22118463}. Cytoplasm {ECO:0000269|PubMed:16971064}. Note=Predominantly nucleolar (PubMed:22118463). In Huh7 cells, predominantly cytoplasmic, with only a subset of cells exhibiting strong nuclear staining; however, the specificity of the polyclonal antibody used in these experiments has not been not documented (PubMed:16971064)…		miRNA catabolic process [GO:0010587]; negative regulation of pre-miRNA processing [GO:2000632]; negative regulation of primary miRNA processing [GO:2000635]; positive regulation of miRNA catabolic process [GO:2000627]; pre-miRNA processing [GO:0031054]; RNA 3'-end processing [GO:0031123]; RNA destabilization [GO:0050779]	RNA binding [GO:0003723]; sequence-specific double-stranded DNA binding [GO:1990837]; zinc ion binding [GO:0008270]	cytosol [GO:0005829]; nucleolus [GO:0005730]; nucleoplasm [GO:0005654]	GO:0003723; GO:0005654; GO:0005730; GO:0005829; GO:0008270; GO:0010587; GO:0031054; GO:0031123; GO:0050779; GO:1990837; GO:2000627; GO:2000632; GO:2000635		hsa:389421;	16.5851	16.6252	16.9131	16.6482	16.705	16.8173	16.8471	16.2453	16.1807	16.1275	16.4228	16.2992	16.4476	16.446
TMX2_Q9Y320	0.40478	-0.348216	-0.643974	-0.857939	-1.26216	-1.37334	-1.38196	0.749984	1.1085	1.53617	1.26159	0.00609378	0.16346	0.637013	TMX2	Thioredoxin-related transmembrane protein 2	Q9Y320	1.02989	0.000200273	0.012444	0.424563	sp|Q9Y320|TMX2_HUMAN Thioredoxin-related transmembrane protein 2 OS=Homo sapiens OX=9606 GN=TMX2 PE=1 SV=1	FUNCTION: Endoplasmic reticulum and mitochondria-associated protein that probably functions as a regulator of cellular redox state and thereby regulates protein post-translational modification, protein folding and mitochondrial activity. Indirectly regulates neuronal proliferation, migration, and organization in the developing brain. {ECO:0000269|PubMed:31735293}.	SUBCELLULAR LOCATION: Endoplasmic reticulum membrane {ECO:0000269|PubMed:31735293}; Single-pass type I membrane protein {ECO:0000255}. Mitochondrion membrane {ECO:0000269|PubMed:31735293}. Note=Localizes to endoplasmic reticulum mitochondria-associated membrane (MAMs) that connect the endoplasmic reticulum and the mitochondria. {ECO:0000269|PubMed:31735293}.	DISEASE: Neurodevelopmental disorder with microcephaly, cortical malformations, and spasticity (NEDMCMS) [MIM:618730]: An autosomal recessive neurodevelopmental disorder characterized by developmental delay, severe to profound intellectual disability, congenital microcephaly, cortical polymicrogyria, lissencephaly, reduced central white matter volume, and drug-resistant epilepsy, lack of speech, …	brain development [GO:0007420]	disulfide oxidoreductase activity [GO:0015036]; identical protein binding [GO:0042802]	endoplasmic reticulum membrane [GO:0005789]; integral component of membrane [GO:0016021]; membrane-bounded organelle [GO:0043227]; mitochondria-associated endoplasmic reticulum membrane [GO:0044233]; mitochondrial membrane [GO:0031966]; mitochondrion [GO:0005739]	GO:0005739; GO:0005789; GO:0007420; GO:0015036; GO:0016021; GO:0031966; GO:0042802; GO:0043227; GO:0044233		hsa:51075;	14.5243	14.3195	14.2391	14.1809	14.0709	14.0407	14.0383	14.6182	14.7158	14.8321	14.7574	14.4159	14.4587	14.5875
TIMM17A_Q99595	0.0619589	-1.15962	-0.728981	-0.837547	-0.983646	-0.692013	-1.48344	0.78255	1.16664	-0.261697	1.46772	0.904136	1.19991	0.564029	TIMM17A	Mitochondrial import inner membrane translocase subunit Tim17-A	Q99595	1.03761	0.000202206	0.0124651	0.491264	sp|Q99595|TI17A_HUMAN Mitochondrial import inner membrane translocase subunit Tim17-A OS=Homo sapiens OX=9606 GN=TIMM17A PE=1 SV=1	FUNCTION: Essential component of the TIM23 complex, a complex that mediates the translocation of transit peptide-containing proteins across the mitochondrial inner membrane.	SUBCELLULAR LOCATION: Mitochondrion inner membrane; Multi-pass membrane protein.		positive regulation of protein processing [GO:0010954]; protein import into mitochondrial matrix [GO:0030150]; protein targeting to mitochondrion [GO:0006626]	protein transmembrane transporter activity [GO:0008320]	integral component of mitochondrial inner membrane [GO:0031305]; mitochondrial inner membrane [GO:0005743]; mitochondrion [GO:0005739]; nucleoplasm [GO:0005654]; TIM23 mitochondrial import inner membrane translocase complex [GO:0005744]	GO:0005654; GO:0005739; GO:0005743; GO:0005744; GO:0006626; GO:0008320; GO:0010954; GO:0030150; GO:0031305	R-HSA-1268020;	hsa:10440;	13.3266	12.9659	13.093	13.061	13.0179	13.104	12.8703	13.5394	13.6528	13.231	13.7417	13.5753	13.6626	13.4748
LEPRE1_Q32P28	0.0888834	1.50386	2	-0.164559	0.443851	0.491006	0.390311	-0.414559	0.347019	-0.306589	-1.288	-1.0087	-1.25011	-0.966349	LEPRE1	Prolyl 3-hydroxylase 1	Q32P28	1.02337	0.000204698	0.0124751	-0.443427	sp|Q32P28|P3H1_HUMAN Prolyl 3-hydroxylase 1 OS=Homo sapiens OX=9606 GN=P3H1 PE=1 SV=2	FUNCTION: Basement membrane-associated chondroitin sulfate proteoglycan (CSPG). Has prolyl 3-hydroxylase activity catalyzing the post-translational formation of 3-hydroxyproline in -Xaa-Pro-Gly- sequences in collagens, especially types IV and V. May be involved in the secretory pathway of cells. Has growth suppressive activity in fibroblasts. {ECO:0000269|PubMed:10951563}.	SUBCELLULAR LOCATION: [Isoform 1]: Endoplasmic reticulum.; SUBCELLULAR LOCATION: Secreted, extracellular space, extracellular matrix {ECO:0000250}. Note=Secreted into the extracellular matrix as a chondroitin sulfate proteoglycan (CSPG). {ECO:0000269|PubMed:19088120}.	DISEASE: Osteogenesis imperfecta 8 (OI8) [MIM:610915]: A form of osteogenesis imperfecta, a connective tissue disorder characterized by low bone mass, bone fragility and susceptibility to fractures after minimal trauma. Disease severity ranges from very mild forms without fractures to intrauterine fractures and perinatal lethality. Extraskeletal manifestations, which affect a variable number of p…	bone development [GO:0060348]; chaperone-mediated protein folding [GO:0061077]; collagen fibril organization [GO:0030199]; collagen metabolic process [GO:0032963]; negative regulation of cell population proliferation [GO:0008285]; negative regulation of post-translational protein modification [GO:1901874]; positive regulation of neuron projection development [GO:0010976]; protein folding [GO:0006…	iron ion binding [GO:0005506]; L-ascorbic acid binding [GO:0031418]; procollagen-proline 3-dioxygenase activity [GO:0019797]	cytoplasm [GO:0005737]; endoplasmic reticulum [GO:0005783]; endoplasmic reticulum lumen [GO:0005788]; extracellular exosome [GO:0070062]; membrane [GO:0016020]; nucleus [GO:0005634]; protein-containing complex [GO:0032991]	GO:0005506; GO:0005634; GO:0005737; GO:0005783; GO:0005788; GO:0006457; GO:0008285; GO:0010976; GO:0016020; GO:0018126; GO:0019797; GO:0030199; GO:0031418; GO:0032963; GO:0032991; GO:0050708; GO:0050821; GO:0060348; GO:0061077; GO:0070062; GO:1901874	R-HSA-1650814;	hsa:64175;	19.2225	19.6719	19.872	19.1421	19.3353	19.3502	19.3183	19.0627	19.3045	19.097	18.7853	18.874	18.7973	18.8874
RAB27A_P51159	0.115467	1.01685	2	0.463896	0.466337	0.286657	1.26934	-1.3457	-0.257246	-1.02812	-0.489518	-1.19626	-0.932616	-0.413798	RAB27A	Ras-related protein Rab-27A;Ras-related protein Rab-27B	P51159	1.02808	0.000206965	0.0124751	-0.440631	sp|P51159|RB27A_HUMAN Ras-related protein Rab-27A OS=Homo sapiens OX=9606 GN=RAB27A PE=1 SV=3;sp|O00194|RB27B_HUMAN Ras-related protein Rab-27B OS=Homo sapiens OX=9606 GN=RAB27B PE=1 SV=4	FUNCTION: Small GTPase which cycles between active GTP-bound and inactive GDP-bound states. In its active state, binds to a variety of effector proteins to regulate homeostasis of late endocytic pathway, including endosomal positioning, maturation and secretion (PubMed:30771381). Plays a role in cytotoxic granule exocytosis in lymphocytes. Required for both granule maturation and granule docking …	SUBCELLULAR LOCATION: Membrane {ECO:0000305}; Lipid-anchor {ECO:0000305}. Melanosome {ECO:0000269|PubMed:12643545, ECO:0000269|PubMed:17081065}. Late endosome {ECO:0000269|PubMed:15548590, ECO:0000269|PubMed:30771381}. Lysosome {ECO:0000269|PubMed:15548590}. Note=Identified by mass spectrometry in melanosome fractions from stage I to stage IV (PubMed:12643545, PubMed:17081065). Localizes to endos…	DISEASE: Griscelli syndrome 2 (GS2) [MIM:607624]: Rare autosomal recessive disorder that results in pigmentary dilution of the skin and hair, the presence of large clumps of pigment in hair shafts, and an accumulation of melanosomes in melanocytes. GS2 patients also develop an uncontrolled T-lymphocyte and macrophage activation syndrome, known as hemophagocytic syndrome, leading to death in the a…	antigen processing and presentation [GO:0019882]; blood coagulation [GO:0007596]; complement-dependent cytotoxicity [GO:0097278]; cytotoxic T cell degranulation [GO:0043316]; exocytosis [GO:0006887]; exosomal secretion [GO:1990182]; melanocyte differentiation [GO:0030318]; melanosome localization [GO:0032400]; melanosome transport [GO:0032402]; multivesicular body organization [GO:0036257]; multi…	GDP binding [GO:0019003]; G protein activity [GO:0003925]; GTPase activity [GO:0003924]; GTP binding [GO:0005525]; myosin V binding [GO:0031489]; protein domain specific binding [GO:0019904]	apical plasma membrane [GO:0016324]; cytosol [GO:0005829]; dendrite [GO:0030425]; exocytic vesicle [GO:0070382]; extracellular exosome [GO:0070062]; extracellular region [GO:0005576]; Golgi apparatus [GO:0005794]; late endosome [GO:0005770]; lysosome [GO:0005764]; melanosome [GO:0042470]; melanosome membrane [GO:0033162]; multivesicular body membrane [GO:0032585]; photoreceptor outer segment [GO:…	GO:0001750; GO:0003924; GO:0003925; GO:0005525; GO:0005576; GO:0005764; GO:0005770; GO:0005794; GO:0005829; GO:0006605; GO:0006887; GO:0007596; GO:0010628; GO:0016324; GO:0019003; GO:0019882; GO:0019904; GO:0030141; GO:0030318; GO:0030425; GO:0030667; GO:0031489; GO:0032400; GO:0032402; GO:0032585; GO:0033093; GO:0033162; GO:0035580; GO:0036257; GO:0042470; GO:0043312; GO:0043316; GO:0043320; GO:…	R-HSA-264876;R-HSA-6798695;R-HSA-8873719;R-HSA-8876198;	hsa:5873;	15.9415	16.1869	16.4668	16.0364	16.037	15.9881	16.2557	15.5436	15.84	15.63	15.7767	15.5843	15.6561	15.7973
TXNDC12_O95881	0.711029	1.98156	0.923486	0.183384	0.232835	0.785814	0.853043	-0.499851	0.216796	-1.29211	-1.17968	-0.848275	-1.21571	-0.852325	TXNDC12	Thioredoxin domain-containing protein 12	O95881	1.01643	0.000207148	0.0124751	-0.320575	sp|O95881|TXD12_HUMAN Thioredoxin domain-containing protein 12 OS=Homo sapiens OX=9606 GN=TXNDC12 PE=1 SV=1	FUNCTION: Possesses significant protein thiol-disulfide oxidase activity. {ECO:0000269|PubMed:12761212}.	SUBCELLULAR LOCATION: Endoplasmic reticulum lumen {ECO:0000269|PubMed:12761212}.		negative regulation of cell death [GO:0060548]; negative regulation of endoplasmic reticulum stress-induced intrinsic apoptotic signaling pathway [GO:1902236]	peptide disulfide oxidoreductase activity [GO:0015037]; protein-disulfide reductase (glutathione) activity [GO:0019153]	endoplasmic reticulum [GO:0005783]; endoplasmic reticulum lumen [GO:0005788]	GO:0005783; GO:0005788; GO:0015037; GO:0019153; GO:0060548; GO:1902236		hsa:51060;	19.8078	20.0592	19.8499	19.7034	19.7132	19.8226	19.8359	19.5683	19.71	19.4115	19.4338	19.4993	19.4266	19.4985
PLEKHO1_Q53GL0	0.137417	1.83051	0.268077	0.683377	1.17475	-0.22684	1.1414	-0.750924	-0.0107464	-1.64298	0.205457	-1.07265	-1.31154	-0.425309	PLEKHO1	Pleckstrin homology domain-containing family O member 1	Q53GL0	1.02873	0.000209601	0.0125265	-0.463105	sp|Q53GL0|PKHO1_HUMAN Pleckstrin homology domain-containing family O member 1 OS=Homo sapiens OX=9606 GN=PLEKHO1 PE=1 SV=2	FUNCTION: Plays a role in the regulation of the actin cytoskeleton through its interactions with actin capping protein (CP). May function to target CK2 to the plasma membrane thereby serving as an adapter to facilitate the phosphorylation of CP by protein kinase 2 (CK2). Appears to target ATM to the plasma membrane. Appears to also inhibit tumor cell growth by inhibiting AKT-mediated cell-surviva…	SUBCELLULAR LOCATION: Cell membrane {ECO:0000269|PubMed:10799509, ECO:0000269|PubMed:11827170, ECO:0000269|PubMed:14729969, ECO:0000269|PubMed:15254037, ECO:0000269|PubMed:16325375}; Peripheral membrane protein {ECO:0000305|PubMed:14729969}. Nucleus {ECO:0000269|PubMed:10799509, ECO:0000269|PubMed:11827170, ECO:0000269|PubMed:15706351}. Cytoplasm {ECO:0000269|PubMed:15706351}. Note=Predominantly …		lamellipodium morphogenesis [GO:0072673]; myoblast fusion [GO:0007520]; myoblast migration [GO:0051451]; regulation of cell shape [GO:0008360]		cytoplasm [GO:0005737]; muscle cell projection membrane [GO:0036195]; nucleus [GO:0005634]; ruffle membrane [GO:0032587]	GO:0005634; GO:0005737; GO:0007520; GO:0008360; GO:0032587; GO:0036195; GO:0051451; GO:0072673		hsa:51177;	16.3964	16.9443	16.4387	16.5731	16.7321	16.2785	16.7213	16.109	16.3485	15.8203	16.4184	16.0048	15.9275	16.2143
ZYX_Q15942	0.371947	-0.641335	-0.453043	-1.3094	-0.634494	-1.12108	-1.12182	1.67708	1.45154	1.37556	-0.0343583	0.710848	0.223168	-0.494613	ZYX	Zyxin	Q15942	1.0187	0.000212164	0.0125835	0.350858	sp|Q15942|ZYX_HUMAN Zyxin OS=Homo sapiens OX=9606 GN=ZYX PE=1 SV=1	FUNCTION: Adhesion plaque protein. Binds alpha-actinin and the CRP protein. Important for targeting TES and ENA/VASP family members to focal adhesions and for the formation of actin-rich structures. May be a component of a signal transduction pathway that mediates adhesion-stimulated changes in gene expression (By similarity). {ECO:0000250}.	SUBCELLULAR LOCATION: Cytoplasm. Cytoplasm, cytoskeleton. Nucleus. Cell junction, focal adhesion. Note=Associates with the actin cytoskeleton near the adhesion plaques. Enters the nucleus in the presence of HESX1.		cell-cell signaling [GO:0007267]; cell-matrix adhesion [GO:0007160]; cellular response to interferon-gamma [GO:0071346]; integrin-mediated signaling pathway [GO:0007229]; regulation of inflammatory response [GO:0050727]; signal transduction [GO:0007165]; stress fiber assembly [GO:0043149]; transforming growth factor beta receptor signaling pathway [GO:0007179]; viral process [GO:0016032]	metal ion binding [GO:0046872]; RNA binding [GO:0003723]	actin cytoskeleton [GO:0015629]; adherens junction [GO:0005912]; cytoplasm [GO:0005737]; cytosol [GO:0005829]; focal adhesion [GO:0005925]; nucleus [GO:0005634]; phagocytic vesicle [GO:0045335]; plasma membrane [GO:0005886]; stress fiber [GO:0001725]	GO:0001725; GO:0003723; GO:0005634; GO:0005737; GO:0005829; GO:0005886; GO:0005912; GO:0005925; GO:0007160; GO:0007165; GO:0007179; GO:0007229; GO:0007267; GO:0015629; GO:0016032; GO:0043149; GO:0045335; GO:0046872; GO:0050727; GO:0071346		hsa:7791;	19.0308	18.7773	18.8244	18.6102	18.7791	18.6573	18.6572	19.3573	19.3009	19.2819	18.9292	19.1156	18.9936	18.814
CLU_P10909	0.0982637	1.69718	1.91281	-0.320363	-0.284751	1.18202	0.767842	-0.909346	-0.505184	-0.310994	-0.874641	-0.988509	-1.11132	-0.353011	CLU	Clusterin;Clusterin beta chain;Clusterin alpha chain	P10909	1.04537	0.000214194	0.0126085	-0.881718	sp|P10909|CLUS_HUMAN Clusterin OS=Homo sapiens OX=9606 GN=CLU PE=1 SV=1	FUNCTION: [Isoform 1]: Functions as extracellular chaperone that prevents aggregation of non native proteins (PubMed:11123922, PubMed:19535339). Prevents stress-induced aggregation of blood plasma proteins (PubMed:11123922, PubMed:12176985, PubMed:17260971, PubMed:19996109). Inhibits formation of amyloid fibrils by APP, APOC2, B2M, CALCA, CSN3, SNCA and aggregation-prone LYZ variants (in vitro) (…	SUBCELLULAR LOCATION: [Isoform 1]: Secreted {ECO:0000269|PubMed:11123922, ECO:0000269|PubMed:17260971, ECO:0000269|PubMed:17412999, ECO:0000269|PubMed:17451556, ECO:0000269|PubMed:2387851, ECO:0000269|PubMed:24073260, ECO:0000269|PubMed:2780565, ECO:0000269|PubMed:3154963, ECO:0000269|PubMed:8292612, ECO:0000269|PubMed:8328966}. Note=Can retrotranslocate from the secretory compartments to the cyt…		antimicrobial humoral response [GO:0019730]; cell morphogenesis [GO:0000902]; central nervous system myelin maintenance [GO:0032286]; chaperone-mediated protein complex assembly [GO:0051131]; chaperone-mediated protein folding [GO:0061077]; chaperone-mediated protein transport involved in chaperone-mediated autophagy [GO:0061741]; complement activation [GO:0006956]; complement activation, classic…	amyloid-beta binding [GO:0001540]; chaperone binding [GO:0051087]; low-density lipoprotein particle receptor binding [GO:0050750]; misfolded protein binding [GO:0051787]; protein-containing complex binding [GO:0044877]; protein heterodimerization activity [GO:0046982]; signaling receptor binding [GO:0005102]; tau protein binding [GO:0048156]; ubiquitin protein ligase binding [GO:0031625]; unfolde…	apical dendrite [GO:0097440]; blood microparticle [GO:0072562]; cell surface [GO:0009986]; chromaffin granule [GO:0042583]; collagen-containing extracellular matrix [GO:0062023]; cytoplasm [GO:0005737]; cytosol [GO:0005829]; extracellular exosome [GO:0070062]; extracellular region [GO:0005576]; extracellular space [GO:0005615]; Golgi apparatus [GO:0005794]; intracellular membrane-bounded organell…	GO:0000902; GO:0001540; GO:0001774; GO:0001836; GO:0002434; GO:0002576; GO:0005102; GO:0005576; GO:0005615; GO:0005634; GO:0005737; GO:0005739; GO:0005743; GO:0005794; GO:0005829; GO:0006629; GO:0006956; GO:0006958; GO:0009615; GO:0009986; GO:0010628; GO:0017038; GO:0019730; GO:0030449; GO:0031093; GO:0031333; GO:0031334; GO:0031625; GO:0032286; GO:0032436; GO:0032760; GO:0032991; GO:0034366; GO:…	R-HSA-114608;R-HSA-166665;R-HSA-6803157;R-HSA-977606;	hsa:1191;	19.9352	20.9117	21.0434	19.6796	19.7013	20.5971	20.3442	19.3198	19.5667	19.6853	19.341	19.2715	19.1965	19.6596
TINAGL1_Q9GZM7	-0.0745807	1.11559	1.93111	0.0489409	0.266369	0.891881	1.37733	-0.990528	-0.875855	-0.726712	-0.0498613	-1.28062	-0.780795	-0.852275	TINAGL1	Tubulointerstitial nephritis antigen-like	Q9GZM7	1.05634	0.000218659	0.0127183	-0.976872	sp|Q9GZM7|TINAL_HUMAN Tubulointerstitial nephritis antigen-like OS=Homo sapiens OX=9606 GN=TINAGL1 PE=1 SV=1	FUNCTION: May be implicated in the adrenocortical zonation and in mechanisms for repressing the CYP11B1 gene expression in adrenocortical cells. This is a non catalytic peptidase C1 family protein (By similarity). {ECO:0000250}.	SUBCELLULAR LOCATION: Secreted {ECO:0000269|PubMed:10799322, ECO:0000269|PubMed:11170462}.		endosomal transport [GO:0016197]; proteolysis [GO:0006508]	extracellular matrix structural constituent [GO:0005201]; laminin binding [GO:0043236]	collagen-containing extracellular matrix [GO:0062023]; extracellular exosome [GO:0070062]; extracellular region [GO:0005576]; extracellular space [GO:0005615]; lysosome [GO:0005764]	GO:0005201; GO:0005576; GO:0005615; GO:0005764; GO:0006508; GO:0016197; GO:0043236; GO:0062023; GO:0070062		hsa:64129;	17.7828	18.5152	19.0169	17.8588	17.9926	18.3775	18.6762	17.2192	17.2898	17.3816	17.798	17.0407	17.3483	17.3043
PGM5_Q15124	-0.0982285	-0.949249	-1.31158	-0.23005	-0.954327	-1.30772	-1.0218	0.773736	0.516443	1.82057	0.785609	1.0376	0.879783	0.0592228	PGM5	Phosphoglucomutase-like protein 5	Q15124	1.02866	0.000219309	0.0127183	0.551976	sp|Q15124|PGM5_HUMAN Phosphoglucomutase-like protein 5 OS=Homo sapiens OX=9606 GN=PGM5 PE=1 SV=2	FUNCTION: Component of adherens-type cell-cell and cell-matrix junctions. Lacks phosphoglucomutase activity.	SUBCELLULAR LOCATION: Cell junction, adherens junction {ECO:0000269|PubMed:8175905}. Cytoplasm, cytoskeleton {ECO:0000269|PubMed:8175905}. Note=Adherens-type cellular junctions. Concentrated in focal contacts at the ends of actin bundles, and associated with actin filaments.		carbohydrate metabolic process [GO:0005975]; cell adhesion [GO:0007155]; glucose metabolic process [GO:0006006]; myofibril assembly [GO:0030239]; striated muscle tissue development [GO:0014706]	intramolecular transferase activity, phosphotransferases [GO:0016868]; magnesium ion binding [GO:0000287]; structural molecule activity [GO:0005198]	adherens junction [GO:0005912]; cell-substrate junction [GO:0030055]; costamere [GO:0043034]; cytoplasmic side of plasma membrane [GO:0009898]; cytosol [GO:0005829]; dystrophin-associated glycoprotein complex [GO:0016010]; focal adhesion [GO:0005925]; intercalated disc [GO:0014704]; sarcolemma [GO:0042383]; spot adherens junction [GO:0005914]; stress fiber [GO:0001725]; Z disc [GO:0030018]	GO:0000287; GO:0001725; GO:0005198; GO:0005829; GO:0005912; GO:0005914; GO:0005925; GO:0005975; GO:0006006; GO:0007155; GO:0009898; GO:0014704; GO:0014706; GO:0016010; GO:0016868; GO:0030018; GO:0030055; GO:0030239; GO:0042383; GO:0043034		hsa:5239;	19.5003	19.2204	19.1012	19.457	19.2187	19.1025	19.1965	19.7871	19.7025	20.1315	19.7911	19.8739	19.822	19.5521
ATP1A1_P05023	0.302451	0.971199	0.827036	1.00676	1.28027	0.494266	0.826654	-1.58303	-0.900163	0.194299	0.0862853	-1.32921	-1.40738	-0.769426	ATP1A1	Sodium/potassium-transporting ATPase subunit alpha-1	P05023	1.01822	0.000223069	0.0128099	-0.406984	sp|P05023|AT1A1_HUMAN Sodium/potassium-transporting ATPase subunit alpha-1 OS=Homo sapiens OX=9606 GN=ATP1A1 PE=1 SV=1	FUNCTION: This is the catalytic component of the active enzyme, which catalyzes the hydrolysis of ATP coupled with the exchange of sodium and potassium ions across the plasma membrane. This action creates the electrochemical gradient of sodium and potassium ions, providing the energy for active transport of various nutrients. {ECO:0000269|PubMed:29499166, ECO:0000269|PubMed:30388404}.	SUBCELLULAR LOCATION: Basolateral cell membrane {ECO:0000250|UniProtKB:P06685}; Multi-pass membrane protein {ECO:0000255}. Cell membrane, sarcolemma {ECO:0000269|PubMed:7711835}; Multi-pass membrane protein {ECO:0000255}. Cell projection, axon {ECO:0000250|UniProtKB:P06685}. Melanosome {ECO:0000269|PubMed:17081065}. Note=Identified by mass spectrometry in melanosome fractions from stage I to stag…	DISEASE: Charcot-Marie-Tooth disease 2DD (CMT2DD) [MIM:618036]: A dominant axonal form of Charcot-Marie-Tooth disease, a disorder of the peripheral nervous system, characterized by progressive weakness and atrophy, initially of the peroneal muscles and later of the distal muscles of the arms. Charcot-Marie-Tooth disease is classified in two main groups on the basis of electrophysiologic propertie…	cardiac muscle cell action potential involved in contraction [GO:0086002]; cell communication by electrical coupling involved in cardiac conduction [GO:0086064]; cellular potassium ion homeostasis [GO:0030007]; cellular response to mechanical stimulus [GO:0071260]; cellular response to steroid hormone stimulus [GO:0071383]; cellular sodium ion homeostasis [GO:0006883]; ion transmembrane transport…	ADP binding [GO:0043531]; ankyrin binding [GO:0030506]; ATP binding [GO:0005524]; chaperone binding [GO:0051087]; phosphatase activity [GO:0016791]; phosphatidylinositol 3-kinase binding [GO:0043548]; potassium ion binding [GO:0030955]; protein domain specific binding [GO:0019904]; protein heterodimerization activity [GO:0046982]; protein kinase binding [GO:0019901]; P-type sodium:potassium-excha…	apical plasma membrane [GO:0016324]; basolateral plasma membrane [GO:0016323]; caveola [GO:0005901]; endoplasmic reticulum [GO:0005783]; endosome [GO:0005768]; extracellular exosome [GO:0070062]; extracellular vesicle [GO:1903561]; Golgi apparatus [GO:0005794]; integral component of membrane [GO:0016021]; intercalated disc [GO:0014704]; lateral plasma membrane [GO:0016328]; melanosome [GO:0042470…	GO:0002026; GO:0002028; GO:0005391; GO:0005524; GO:0005768; GO:0005783; GO:0005794; GO:0005886; GO:0005890; GO:0005901; GO:0006883; GO:0008217; GO:0014069; GO:0014704; GO:0016020; GO:0016021; GO:0016323; GO:0016324; GO:0016328; GO:0016791; GO:0019901; GO:0019904; GO:0030007; GO:0030315; GO:0030506; GO:0030955; GO:0031090; GO:0031402; GO:0031947; GO:0032991; GO:0034220; GO:0036126; GO:0036376; GO:…	R-HSA-5578775;R-HSA-936837;R-HSA-9679191;	hsa:476;	22.6132	22.7801	22.7441	22.7889	22.8572	22.661	22.744	22.1427	22.3131	22.5862	22.5592	22.206	22.1865	22.3457
FMOD_Q06828	0.380226	1.56747	1.85687	-0.283694	0.0789515	1.1723	0.809766	-0.530277	-1.05899	-1.07767	-0.801336	-1.00445	-0.512376	-0.596793	FMOD	Fibromodulin	Q06828	1.13372	0.000231089	0.0128099	-1.78622	sp|Q06828|FMOD_HUMAN Fibromodulin OS=Homo sapiens OX=9606 GN=FMOD PE=1 SV=2	FUNCTION: Affects the rate of fibrils formation. May have a primary role in collagen fibrillogenesis (By similarity). {ECO:0000250}.	SUBCELLULAR LOCATION: Secreted, extracellular space, extracellular matrix.		collagen fibril organization [GO:0030199]; keratan sulfate biosynthetic process [GO:0018146]; keratan sulfate catabolic process [GO:0042340]; transforming growth factor beta receptor complex assembly [GO:0007181]		collagen-containing extracellular matrix [GO:0062023]; extracellular matrix [GO:0031012]; extracellular region [GO:0005576]; extracellular space [GO:0005615]; Golgi lumen [GO:0005796]; lysosomal lumen [GO:0043202]	GO:0005576; GO:0005615; GO:0005796; GO:0007181; GO:0018146; GO:0030199; GO:0031012; GO:0042340; GO:0043202; GO:0062023	R-HSA-2022854;R-HSA-2022857;R-HSA-3000178;R-HSA-3656225;R-HSA-3656243;R-HSA-3656244;	hsa:2331;	14.6764	16.0061	16.3303	13.9328	14.339	15.5636	15.1575	13.6566	13.0645	13.0436	13.3531	13.1256	13.6767	13.5822
PVRL2_Q92692	0.677875	1.5753	0.385065	0.922611	0.926912	0.183642	0.640754	-1.0704	0.192965	-0.701638	0.38242	-1.20786	-1.80617	-1.10148	PVRL2	Nectin-2	Q92692	1.01928	0.000231747	0.0128099	-0.367441	sp|Q92692|NECT2_HUMAN Nectin-2 OS=Homo sapiens OX=9606 GN=NECTIN2 PE=1 SV=1	FUNCTION: Modulator of T-cell signaling. Can be either a costimulator of T-cell function, or a coinhibitor, depending on the receptor it binds to. Upon binding to CD226, stimulates T-cell proliferation and cytokine production, including that of IL2, IL5, IL10, IL13, and IFNG. Upon interaction with PVRIG, inhibits T-cell proliferation. These interactions are competitive (PubMed:26755705). Probable…	SUBCELLULAR LOCATION: Cell membrane; Single-pass type I membrane protein.		acrosome assembly [GO:0001675]; adherens junction organization [GO:0034332]; adhesion of symbiont to host [GO:0044406]; cell part morphogenesis [GO:0032990]; cilium organization [GO:0044782]; coreceptor-mediated virion attachment to host cell [GO:0046814]; cytoskeleton organization [GO:0007010]; establishment of mitochondrion localization [GO:0051654]; fertilization [GO:0009566]; fusion of virus …	cell adhesion molecule binding [GO:0050839]; coreceptor activity [GO:0015026]; identical protein binding [GO:0042802]; protein homodimerization activity [GO:0042803]; virus receptor activity [GO:0001618]	apical junction complex [GO:0043296]; cell-cell contact zone [GO:0044291]; cell-cell junction [GO:0005911]; cell surface [GO:0009986]; extracellular exosome [GO:0070062]; focal adhesion [GO:0005925]; integral component of membrane [GO:0016021]; plasma membrane [GO:0005886]; zonula adherens [GO:0005915]	GO:0001618; GO:0001675; GO:0002860; GO:0002891; GO:0005886; GO:0005911; GO:0005915; GO:0005925; GO:0007010; GO:0007156; GO:0007286; GO:0007289; GO:0009566; GO:0009986; GO:0015026; GO:0016021; GO:0019064; GO:0030382; GO:0032990; GO:0033005; GO:0034332; GO:0042271; GO:0042802; GO:0042803; GO:0043296; GO:0044291; GO:0044406; GO:0044782; GO:0045954; GO:0046596; GO:0046814; GO:0050776; GO:0050839; GO:…	R-HSA-198933;R-HSA-418990;R-HSA-420597;	hsa:5819;	19.407	19.6242	19.3361	19.4662	19.4673	19.2873	19.398	18.9837	19.2896	19.073	19.3354	18.9505	18.8056	18.9762
SULT1E1_P49888	-0.869595	-0.834309	-0.278774	-1.09412	-1.24742	-0.0746003	-1.01793	1.14195	2	0.963515	0.354745	0.545884	0.321873	-0.124736	SULT1E1	Estrogen sulfotransferase	P49888	1.07665	0.000231963	0.0128099	1.20694	sp|P49888|ST1E1_HUMAN Estrogen sulfotransferase OS=Homo sapiens OX=9606 GN=SULT1E1 PE=1 SV=1	FUNCTION: Sulfotransferase that utilizes 3'-phospho-5'-adenylyl sulfate (PAPS) as sulfonate donor to catalyze the sulfate conjugation of estradiol and estrone (PubMed:7779757, PubMed:11884392, PubMed:11006110). Is a key enzyme in estrogen homeostasis, the sulfation of estrogens leads to their inactivation. Also sulfates dehydroepiandrosterone (DHEA), pregnenolone, (24S)-hydroxycholesterol and xen…	SUBCELLULAR LOCATION: Cytoplasm, cytosol {ECO:0000269|PubMed:11006110}.		3'-phosphoadenosine 5'-phosphosulfate metabolic process [GO:0050427]; estrogen catabolic process [GO:0006711]; estrogen metabolic process [GO:0008210]; ethanol catabolic process [GO:0006068]; positive regulation of fat cell differentiation [GO:0045600]; steroid metabolic process [GO:0008202]; sulfation [GO:0051923]	aryl sulfotransferase activity [GO:0004062]; estrone sulfotransferase activity [GO:0004304]; flavonol 3-sulfotransferase activity [GO:0047894]; steroid binding [GO:0005496]; steroid sulfotransferase activity [GO:0050294]; sulfotransferase activity [GO:0008146]	cytoplasm [GO:0005737]; cytosol [GO:0005829]; nuclear membrane [GO:0031965]	GO:0004062; GO:0004304; GO:0005496; GO:0005737; GO:0005829; GO:0006068; GO:0006711; GO:0008146; GO:0008202; GO:0008210; GO:0031965; GO:0045600; GO:0047894; GO:0050294; GO:0050427; GO:0051923	R-HSA-156584;	hsa:6783;	15.6709	15.6985	16.1317	15.4958	15.3763	16.2909	15.5553	17.2397	18.0753	17.1005	16.6258	16.7748	16.6001	16.2518
KDELC2_Q7Z4H8	0.979969	1.60545	0.775757	0.225474	0.320312	1.12218	0.854559	-0.695689	-0.134293	-1.4029	-0.15042	-1.13241	-1.44724	-0.920742	KDELC2	KDEL motif-containing protein 2	Q7Z4H8	1.02313	0.000233052	0.0128099	-0.400804	sp|Q7Z4H8|PLGT3_HUMAN Protein O-glucosyltransferase 3 OS=Homo sapiens OX=9606 GN=KDELC2 PE=1 SV=2	FUNCTION: Protein glucosyltransferase that catalyzes the transfer of glucose from UDP-glucose to a serine residue within the consensus sequence peptide C-X-N-T-X-G-S-F-X-C (PubMed:30127001). Can also catalyze the transfer of xylose from UDP-xylose but less efficiently (PubMed:30127001). Specifically targets extracellular EGF repeats of proteins such as NOTCH1 and NOTCH3 (PubMed:30127001). May reg…	SUBCELLULAR LOCATION: Endoplasmic reticulum lumen {ECO:0000255|PROSITE-ProRule:PRU10138}.		protein O-linked glycosylation via serine [GO:0018242]	EGF-domain serine glucosyltransferase activity [GO:0140561]; EGF-domain serine xylosyltransferase activity [GO:0140562]; glucosyltransferase activity [GO:0046527]; UDP-glucosyltransferase activity [GO:0035251]; UDP-xylosyltransferase activity [GO:0035252]	endomembrane system [GO:0012505]; endoplasmic reticulum lumen [GO:0005788]	GO:0005788; GO:0012505; GO:0018242; GO:0035251; GO:0035252; GO:0046527; GO:0140561; GO:0140562		hsa:143888;	17.7654	17.9146	17.7167	17.5855	17.6081	17.7993	17.7355	17.3659	17.4998	17.1973	17.4959	17.2618	17.1867	17.3123
ARG2_P78540	0.2281	2	1.56584	-0.0742634	0.421685	0.3406	0.432769	-0.981195	-0.170231	-0.870852	-0.162066	-1.14274	-1.03772	-0.824002	ARG2	Arginase-2, mitochondrial	P78540	1.06096	0.00023511	0.0128099	-0.987366	sp|P78540|ARGI2_HUMAN Arginase-2, mitochondrial OS=Homo sapiens OX=9606 GN=ARG2 PE=1 SV=1	FUNCTION: May play a role in the regulation of extra-urea cycle arginine metabolism and also in down-regulation of nitric oxide synthesis. Extrahepatic arginase functions to regulate L-arginine bioavailability to nitric oxid synthase (NOS). Arginine metabolism is a critical regulator of innate and adaptive immune responses. Seems to be involved in negative regulation of the survival capacity of a…	SUBCELLULAR LOCATION: Mitochondrion {ECO:0000269|PubMed:8898077}.		adaptive immune response [GO:0002250]; arginine catabolic process to ornithine [GO:0019547]; innate immune response [GO:0045087]; negative regulation of activated CD8-positive, alpha-beta T cell apoptotic process [GO:1905403]; negative regulation of CD4-positive, alpha-beta T cell proliferation [GO:2000562]; negative regulation of chemokine (C-C motif) ligand 4 production [GO:0071644]; negative r…	arginase activity [GO:0004053]; manganese ion binding [GO:0030145]	cytoplasm [GO:0005737]; mitochondrial matrix [GO:0005759]; mitochondrion [GO:0005739]	GO:0000050; GO:0001657; GO:0002250; GO:0002829; GO:0004053; GO:0005737; GO:0005739; GO:0005759; GO:0006809; GO:0006941; GO:0019547; GO:0030145; GO:0032651; GO:0032696; GO:0032700; GO:0032720; GO:0045087; GO:0071641; GO:0071644; GO:0071650; GO:1900425; GO:1903426; GO:1905403; GO:2000562; GO:2000774	R-HSA-70635;	hsa:384;	16.8432	18.2058	17.7341	16.6418	16.9721	16.9181	16.9795	16.0378	16.5779	16.1113	16.5833	15.9302	16.0002	16.1425
FGF1_P05230	0.328988	-1.55909	-1.27908	-0.0244478	-0.573851	-0.654286	-1.19542	0.974628	-0.300902	0.329133	0.277807	1.59632	1.63176	0.448442	FGF1	Fibroblast growth factor 1	P05230	1.04144	0.00023594	0.0128099	0.69833	sp|P05230|FGF1_HUMAN Fibroblast growth factor 1 OS=Homo sapiens OX=9606 GN=FGF1 PE=1 SV=1	FUNCTION: Plays an important role in the regulation of cell survival, cell division, angiogenesis, cell differentiation and cell migration. Functions as potent mitogen in vitro. Acts as a ligand for FGFR1 and integrins. Binds to FGFR1 in the presence of heparin leading to FGFR1 dimerization and activation via sequential autophosphorylation on tyrosine residues which act as docking sites for inter…	SUBCELLULAR LOCATION: Secreted. Cytoplasm. Cytoplasm, cell cortex. Cytoplasm, cytosol. Nucleus. Note=Lacks a cleavable signal sequence. Within the cytoplasm, it is transported to the cell membrane and then secreted by a non-classical pathway that requires Cu(2+) ions and S100A13. Secreted in a complex with SYT1 (By similarity). Binding of exogenous FGF1 to FGFR facilitates endocytosis followed by…		activation of MAPK activity [GO:0000187]; activation of protein kinase B activity [GO:0032148]; anatomical structure morphogenesis [GO:0009653]; angiogenesis [GO:0001525]; animal organ morphogenesis [GO:0009887]; branch elongation involved in ureteric bud branching [GO:0060681]; cell differentiation [GO:0030154]; cellular response to heat [GO:0034605]; fibroblast growth factor receptor signaling …	fibroblast growth factor receptor binding [GO:0005104]; growth factor activity [GO:0008083]; heparin binding [GO:0008201]; Hsp70 protein binding [GO:0030544]; integrin binding [GO:0005178]; S100 protein binding [GO:0044548]	cell cortex [GO:0005938]; cytoplasm [GO:0005737]; cytosol [GO:0005829]; extracellular matrix [GO:0031012]; extracellular region [GO:0005576]; extracellular space [GO:0005615]; nucleolus [GO:0005730]; nucleoplasm [GO:0005654]; nucleus [GO:0005634]	GO:0000165; GO:0000187; GO:0001525; GO:0001759; GO:0001934; GO:0005104; GO:0005178; GO:0005576; GO:0005615; GO:0005634; GO:0005654; GO:0005730; GO:0005737; GO:0005829; GO:0005938; GO:0007165; GO:0007275; GO:0008083; GO:0008201; GO:0008284; GO:0008543; GO:0009653; GO:0009887; GO:0010595; GO:0010628; GO:0030154; GO:0030324; GO:0030334; GO:0030335; GO:0030544; GO:0031012; GO:0032148; GO:0034605; GO:…	R-HSA-109704;R-HSA-1257604;R-HSA-1839122;R-HSA-1839130;R-HSA-190322;R-HSA-190370;R-HSA-190371;R-HSA-190372;R-HSA-190373;R-HSA-190375;R-HSA-190377;R-HSA-2033514;R-HSA-2033519;R-HSA-2219530;R-HSA-5654219;R-HSA-5654221;R-HSA-5654227;R-HSA-5654228;R-HSA-5654687;R-HSA-5654688;R-HSA-5654689;R-HSA-5654693;R-HSA-5654695;R-HSA-5654699;R-HSA-5654700;R-HSA-5654704;R-HSA-5654706;R-HSA-5654710;R-HSA-5654712;R…	hsa:2246;	17.3639	16.433	16.5711	17.1897	16.9188	16.8791	16.6123	17.6823	17.0534	17.364	17.3387	17.9888	18.0063	17.4228
MAP2_P11137	-0.585935	-1.39684	-1.18912	-0.758346	-0.738178	-0.378301	-0.791955	1.71731	1.09823	1.33745	0.519639	1.08685	0.00240629	0.0767969	MAP2	Microtubule-associated protein 2	P11137	1.04203	0.00023785	0.0128099	0.613611	sp|P11137|MTAP2_HUMAN Microtubule-associated protein 2 OS=Homo sapiens OX=9606 GN=MAP2 PE=1 SV=4	FUNCTION: The exact function of MAP2 is unknown but MAPs may stabilize the microtubules against depolymerization. They also seem to have a stiffening effect on microtubules.	SUBCELLULAR LOCATION: Cytoplasm, cytoskeleton {ECO:0000305}. Cell projection, dendrite {ECO:0000250|UniProtKB:P20357}.		central nervous system neuron development [GO:0021954]; dendrite development [GO:0016358]; dendrite morphogenesis [GO:0048813]; microtubule bundle formation [GO:0001578]; microtubule cytoskeleton organization [GO:0000226]; negative regulation of axon extension [GO:0030517]; negative regulation of microtubule binding [GO:1904527]; negative regulation of microtubule motor activity [GO:2000575]; neg…	calmodulin binding [GO:0005516]; dystroglycan binding [GO:0002162]; microtubule binding [GO:0008017]; structural molecule activity [GO:0005198]; tau protein binding [GO:0048156]	apical distal dendrite [GO:0150014]; axon hillock [GO:0043203]; axon initial segment [GO:0043194]; basal dendrite [GO:0097441]; cytoplasm [GO:0005737]; cytosol [GO:0005829]; dendrite [GO:0030425]; dendrite cytoplasm [GO:0032839]; dendritic branch [GO:0044307]; dendritic filopodium [GO:1902737]; dendritic growth cone [GO:0044294]; dendritic shaft [GO:0043198]; distal dendrite [GO:0150002]; microtu…	GO:0000226; GO:0001578; GO:0002162; GO:0005198; GO:0005516; GO:0005737; GO:0005829; GO:0005874; GO:0005875; GO:0008017; GO:0016358; GO:0021954; GO:0030425; GO:0030517; GO:0031113; GO:0031115; GO:0031175; GO:0032839; GO:0043005; GO:0043025; GO:0043194; GO:0043198; GO:0043203; GO:0044294; GO:0044307; GO:0048156; GO:0048813; GO:0097441; GO:0150001; GO:0150002; GO:0150014; GO:1901953; GO:1902513; GO:…		hsa:4133;	14.691	14.3928	14.4692	14.6276	14.635	14.7674	14.6153	15.5382	15.3105	15.3985	15.0977	15.3063	14.9075	14.9348
PLOD2_O00469	0.305968	1.8034	1.60116	-0.573171	0.0988036	0.523888	0.666105	-0.714992	0.348203	0.371919	-0.78553	-1.05415	-1.59303	-0.998578	PLOD2	Procollagen-lysine,2-oxoglutarate 5-dioxygenase 2	O00469	1.02637	0.0002382	0.0128099	-0.48955	sp|O00469|PLOD2_HUMAN Procollagen-lysine,2-oxoglutarate 5-dioxygenase 2 OS=Homo sapiens OX=9606 GN=PLOD2 PE=1 SV=2	FUNCTION: Forms hydroxylysine residues in -Xaa-Lys-Gly- sequences in collagens. These hydroxylysines serve as sites of attachment for carbohydrate units and are essential for the stability of the intermolecular collagen cross-links. {ECO:0000250|UniProtKB:P24802}.	SUBCELLULAR LOCATION: Rough endoplasmic reticulum membrane; Peripheral membrane protein; Lumenal side.	DISEASE: Bruck syndrome 2 (BRKS2) [MIM:609220]: An autosomal recessive disease characterized by generalized osteopenia, congenital joint contractures, fragile bones with onset of fractures in infancy or early childhood, short stature, severe limb deformity, progressive scoliosis, and pterygia. It is distinguished from osteogenesis imperfecta by the absence of hearing loss and dentinogenesis imper…	cellular protein modification process [GO:0006464]; collagen fibril organization [GO:0030199]; hydroxylysine biosynthetic process [GO:0046947]; peptidyl-lysine hydroxylation [GO:0017185]; response to hypoxia [GO:0001666]	iron ion binding [GO:0005506]; L-ascorbic acid binding [GO:0031418]; procollagen-lysine 5-dioxygenase activity [GO:0008475]	endoplasmic reticulum [GO:0005783]; endoplasmic reticulum membrane [GO:0005789]; extracellular exosome [GO:0070062]; rough endoplasmic reticulum membrane [GO:0030867]	GO:0001666; GO:0005506; GO:0005783; GO:0005789; GO:0006464; GO:0008475; GO:0017185; GO:0030199; GO:0030867; GO:0031418; GO:0046947; GO:0070062	R-HSA-1650814;	hsa:5352;	18.927	19.5067	19.4284	18.5867	18.8468	19.0114	19.0664	18.5318	18.9434	18.9526	18.5045	18.4005	18.1919	18.422
MAP6_Q96JE9	-0.588206	-0.0746557	-1.25779	-1.05448	-1.40002	-0.388981	-0.770173	0.333953	1.41383	2	0.206643	0.528117	0.561497	0.407895	MAP6	Microtubule-associated protein 6	Q96JE9	1.06994	0.000238381	0.0128099	0.829634	sp|Q96JE9|MAP6_HUMAN Microtubule-associated protein 6 OS=Homo sapiens OX=9606 GN=MAP6 PE=1 SV=2	FUNCTION: Involved in microtubule stabilization in many cell types, including neuronal cells (By similarity). Specifically has microtubule cold stabilizing activity (By similarity). Involved in dendrite morphogenesis and maintenance by regulating lysosomal trafficking via its interaction with TMEM106B (PubMed:24357581). Regulates KIF5A-mediated axonal cargo transport (By similarity). Regulates ax…	SUBCELLULAR LOCATION: Cytoplasm, cytoskeleton {ECO:0000269|PubMed:14692697}. Golgi apparatus {ECO:0000250|UniProtKB:Q63560}. Cell projection, axon {ECO:0000250|UniProtKB:Q63560}. Cell projection, dendrite {ECO:0000250|UniProtKB:Q63560}. Cytoplasmic vesicle, secretory vesicle membrane {ECO:0000250|UniProtKB:Q63560}; Lipid-anchor {ECO:0000250|UniProtKB:Q63560}; Cytoplasmic side {ECO:0000250|UniProt…		cytoskeleton-dependent intracellular transport [GO:0030705]; dendrite morphogenesis [GO:0048813]; lysosome localization [GO:0032418]; microtubule cytoskeleton organization [GO:0000226]; positive regulation of axonogenesis [GO:0050772]; regulation of microtubule cytoskeleton organization [GO:0070507]	calmodulin binding [GO:0005516]; microtubule binding [GO:0008017]	axon [GO:0030424]; cis-Golgi network [GO:0005801]; dendrite [GO:0030425]; Golgi-associated vesicle [GO:0005798]; microtubule [GO:0005874]; perinuclear region of cytoplasm [GO:0048471]; transport vesicle membrane [GO:0030658]	GO:0000226; GO:0005516; GO:0005798; GO:0005801; GO:0005874; GO:0008017; GO:0030424; GO:0030425; GO:0030658; GO:0030705; GO:0032418; GO:0048471; GO:0048813; GO:0050772; GO:0070507		hsa:4135;	11.969	12.2384	11.6176	11.7243	11.543	12.0735	11.8735	12.4528	13.0194	13.3701	12.386	12.5547	12.5722	12.4916
FBLIM1_Q8WUP2	-0.0827799	-0.903095	-0.435833	-1.02297	-1.21306	-0.74072	-1.04438	0.819	1.84637	1.77674	0.216245	0.561017	0.433564	-0.210091	FBLIM1	Filamin-binding LIM protein 1	Q8WUP2	1.02663	0.000238887	0.0128099	0.476346	sp|Q8WUP2|FBLI1_HUMAN Filamin-binding LIM protein 1 OS=Homo sapiens OX=9606 GN=FBLIM1 PE=1 SV=2	FUNCTION: Serves as an anchoring site for cell-ECM adhesion proteins and filamin-containing actin filaments. Is implicated in cell shape modulation (spreading) and motility. May participate in the regulation of filamin-mediated cross-linking and stabilization of actin filaments. May also regulate the assembly of filamin-containing signaling complexes that control actin assembly. Promotes dissocia…	SUBCELLULAR LOCATION: Cell junction, focal adhesion {ECO:0000269|PubMed:12679033, ECO:0000269|PubMed:18829455}. Cytoplasm, cytoskeleton, stress fiber {ECO:0000269|PubMed:12496242, ECO:0000269|PubMed:12679033, ECO:0000269|PubMed:18829455}. Note=Associated with actin stress fiber at cell-ECM focal adhesion sites (PubMed:12679033, PubMed:18829455). Isoform 1 and isoform 3 are recruited and localized…		cell-cell adhesion [GO:0098609]; cell junction assembly [GO:0034329]; regulation of cell shape [GO:0008360]; regulation of integrin activation [GO:0033623]	filamin binding [GO:0031005]; metal ion binding [GO:0046872]	cell junction [GO:0030054]; cell periphery [GO:0071944]; cytoplasm [GO:0005737]; cytosol [GO:0005829]; fibrillar center [GO:0001650]; focal adhesion [GO:0005925]; stress fiber [GO:0001725]	GO:0001650; GO:0001725; GO:0005737; GO:0005829; GO:0005925; GO:0008360; GO:0030054; GO:0031005; GO:0033623; GO:0034329; GO:0046872; GO:0071944; GO:0098609	R-HSA-446353;	hsa:54751;	18.0985	17.8472	17.9904	17.8105	17.7523	17.897	17.804	18.3747	18.6894	18.6681	18.1901	18.2957	18.2567	18.0595
PRELP_P51888	0.464371	1.05917	1.7147	-1.03305	-0.117134	1.35587	1.07438	-0.130177	-0.700984	-0.449359	-1.47999	-1.10478	-0.722961	0.0699274	PRELP	Prolargin	P51888	1.06855	0.000242027	0.0128463	-0.941242	sp|P51888|PRELP_HUMAN Prolargin OS=Homo sapiens OX=9606 GN=PRELP PE=1 SV=1	FUNCTION: May anchor basement membranes to the underlying connective tissue. {ECO:0000250}.	SUBCELLULAR LOCATION: Secreted, extracellular space, extracellular matrix.		cell aging [GO:0007569]; keratan sulfate biosynthetic process [GO:0018146]; keratan sulfate catabolic process [GO:0042340]; skeletal system development [GO:0001501]	extracellular matrix structural constituent [GO:0005201]; extracellular matrix structural constituent conferring compression resistance [GO:0030021]; heparin binding [GO:0008201]	collagen-containing extracellular matrix [GO:0062023]; extracellular exosome [GO:0070062]; extracellular matrix [GO:0031012]; extracellular region [GO:0005576]; extracellular space [GO:0005615]; extracellular vesicle [GO:1903561]; Golgi lumen [GO:0005796]; lysosomal lumen [GO:0043202]	GO:0001501; GO:0005201; GO:0005576; GO:0005615; GO:0005796; GO:0007569; GO:0008201; GO:0018146; GO:0030021; GO:0031012; GO:0042340; GO:0043202; GO:0062023; GO:0070062; GO:1903561	R-HSA-2022854;R-HSA-2022857;R-HSA-3656225;R-HSA-3656243;R-HSA-3656244;	hsa:5549;	14.5406	14.9742	15.4522	13.4488	14.1166	15.1906	14.9853	14.1071	13.6909	13.8743	13.1229	13.3965	13.6749	14.253
ATF2_P15336	0.866701	1.74446	0.758628	0.888892	0.811948	0.221901	0.0256842	-0.490572	-0.0318	-1.62383	0.128934	-0.996129	-1.69435	-0.610479	ATF2	Cyclic AMP-dependent transcription factor ATF-2	P15336	1.02301	0.000243841	0.0128463	-0.409201	sp|P15336|ATF2_HUMAN Cyclic AMP-dependent transcription factor ATF-2 OS=Homo sapiens OX=9606 GN=ATF2 PE=1 SV=4	FUNCTION: Transcriptional activator which regulates the transcription of various genes, including those involved in anti-apoptosis, cell growth, and DNA damage response. Dependent on its binding partner, binds to CRE (cAMP response element) consensus sequences (5'-TGACGTCA-3') or to AP-1 (activator protein 1) consensus sequences (5'-TGACTCA-3'). In the nucleus, contributes to global transcription…	SUBCELLULAR LOCATION: Nucleus. Cytoplasm. Mitochondrion outer membrane. Note=Shuttles between the cytoplasm and the nucleus and heterodimerization with JUN is essential for the nuclear localization. Localization to the cytoplasm is observed under conditions of cellular stress and in disease states. Localizes at the mitochondrial outer membrane in response to genotoxic stress. Phosphorylation at T…		adipose tissue development [GO:0060612]; amelogenesis [GO:0097186]; cellular response to amino acid starvation [GO:0034198]; cellular response to DNA damage stimulus [GO:0006974]; fat cell differentiation [GO:0045444]; histone H2B acetylation [GO:0043969]; histone H4 acetylation [GO:0043967]; intra-S DNA damage checkpoint [GO:0031573]; negative regulation of angiogenesis [GO:0016525]; negative re…	cAMP response element binding [GO:0035497]; cAMP response element binding protein binding [GO:0008140]; chromatin binding [GO:0003682]; cis-regulatory region sequence-specific DNA binding [GO:0000987]; DNA-binding transcription activator activity, RNA polymerase II-specific [GO:0001228]; DNA-binding transcription factor activity [GO:0003700]; DNA-binding transcription factor activity, RNA polymer…	chromatin [GO:0000785]; cytoplasm [GO:0005737]; H4 histone acetyltransferase complex [GO:1902562]; mitochondrial outer membrane [GO:0005741]; nucleoplasm [GO:0005654]; nucleus [GO:0005634]; site of double-strand break [GO:0035861]	GO:0000122; GO:0000785; GO:0000977; GO:0000978; GO:0000981; GO:0000987; GO:0001102; GO:0001228; GO:0003151; GO:0003682; GO:0003700; GO:0005634; GO:0005654; GO:0005737; GO:0005741; GO:0006355; GO:0006357; GO:0006970; GO:0006974; GO:0008140; GO:0009414; GO:0010485; GO:0010628; GO:0016525; GO:0019901; GO:0031573; GO:0032915; GO:0034198; GO:0035497; GO:0035861; GO:0043525; GO:0043967; GO:0043969; GO:…	R-HSA-2151201;R-HSA-3214847;R-HSA-400253;R-HSA-450341;R-HSA-6796648;R-HSA-8943724;R-HSA-9018519;R-HSA-9031628;R-HSA-9633012;	hsa:1386;	18.2238	18.4602	18.1947	18.2298	18.2091	18.0502	17.9973	17.8583	17.9819	17.5531	18.0251	17.7222	17.5341	17.826
FBN2_P35556	-0.134971	1.89136	0.58456	-0.154689	0.59994	1.55285	0.76756	-0.823083	0.108582	-0.110259	-1.13043	-1.24121	-1.36384	-0.546362	FBN2	Fibrillin-2	P35556	1.04216	0.000244488	0.0128463	-0.938053	sp|P35556|FBN2_HUMAN Fibrillin-2 OS=Homo sapiens OX=9606 GN=FBN2 PE=1 SV=3	FUNCTION: [Fibrillin-2]: Fibrillins are structural components of 10-12 nm extracellular calcium-binding microfibrils, which occur either in association with elastin or in elastin-free bundles. Fibrillin-2-containing microfibrils regulate the early process of elastic fiber assembly. Regulates osteoblast maturation by controlling TGF-beta bioavailability and calibrating TGF-beta and BMP levels, res…	SUBCELLULAR LOCATION: Secreted, extracellular space, extracellular matrix.	DISEASE: Contractural arachnodactyly, congenital (CCA) [MIM:121050]: An autosomal dominant connective tissue disorder characterized by contractures, arachnodactyly, scoliosis, and crumpled ears. {ECO:0000269|PubMed:10797416, ECO:0000269|PubMed:11754102, ECO:0000269|PubMed:19006240, ECO:0000269|PubMed:20799338, ECO:0000269|PubMed:25834781, ECO:0000269|PubMed:27196565, ECO:0000269|PubMed:7493032, E…	anatomical structure morphogenesis [GO:0009653]; bone trabecula formation [GO:0060346]; camera-type eye development [GO:0043010]; embryonic eye morphogenesis [GO:0048048]; embryonic limb morphogenesis [GO:0030326]; extracellular matrix organization [GO:0030198]; positive regulation of bone mineralization [GO:0030501]; positive regulation of osteoblast differentiation [GO:0045669]; sequestering of…	calcium ion binding [GO:0005509]; extracellular matrix constituent conferring elasticity [GO:0030023]; extracellular matrix structural constituent [GO:0005201]	collagen-containing extracellular matrix [GO:0062023]; extracellular matrix [GO:0031012]; extracellular region [GO:0005576]; microfibril [GO:0001527]	GO:0001527; GO:0005201; GO:0005509; GO:0005576; GO:0009653; GO:0030023; GO:0030198; GO:0030326; GO:0030501; GO:0031012; GO:0035583; GO:0043010; GO:0045669; GO:0048048; GO:0060346; GO:0062023	R-HSA-1474228;R-HSA-1566948;R-HSA-2129379;	hsa:2201;	22.6347	23.9375	23.0973	22.622	23.1072	23.7198	23.215	22.1923	22.7913	22.6506	21.9947	21.9235	21.8446	22.3702
CPM_P14384	-0.0682449	2	0.976237	0.757504	0.646257	0.849588	0.0667988	-1.19075	-0.960274	0.037701	-0.590066	-1.10339	-0.516336	-1.11855	CPM	Carboxypeptidase M	P14384	1.03853	0.00025545	0.0131506	-0.519731	sp|P14384|CBPM_HUMAN Carboxypeptidase M OS=Homo sapiens OX=9606 GN=CPM PE=1 SV=2	FUNCTION: Specifically removes C-terminal basic residues (Arg or Lys) from peptides and proteins. It is believed to play important roles in the control of peptide hormone and growth factor activity at the cell surface, and in the membrane-localized degradation of extracellular proteins. {ECO:0000269|PubMed:12457462}.	SUBCELLULAR LOCATION: Cell membrane {ECO:0000269|PubMed:12457462}; Lipid-anchor, GPI-anchor {ECO:0000269|PubMed:12457462}.		anatomical structure morphogenesis [GO:0009653]; peptide metabolic process [GO:0006518]; protein processing [GO:0016485]	carboxypeptidase activity [GO:0004180]; metallocarboxypeptidase activity [GO:0004181]; zinc ion binding [GO:0008270]	anchored component of membrane [GO:0031225]; cell surface [GO:0009986]; extracellular exosome [GO:0070062]; extracellular region [GO:0005576]; extracellular space [GO:0005615]; plasma membrane [GO:0005886]	GO:0004180; GO:0004181; GO:0005576; GO:0005615; GO:0005886; GO:0006518; GO:0008270; GO:0009653; GO:0009986; GO:0016485; GO:0031225; GO:0070062	R-HSA-163125;	hsa:1368;	13.7274	14.4902	14.0766	14.0035	13.9663	14.0343	13.7726	13.3522	13.4292	13.7629	13.553	13.3814	13.5776	13.3763
BTN2A1_Q7KYR7	0.50733	1.34982	1.81486	0.632444	0.801863	0.537282	0.289769	-0.392962	-0.51289	-1.14269	-0.286687	-1.26566	-0.96161	-1.37087	BTN2A1	Butyrophilin subfamily 2 member A1	Q7KYR7	1.02065	0.00025589	0.0131506	-0.403783	sp|Q7KYR7|BT2A1_HUMAN Butyrophilin subfamily 2 member A1 OS=Homo sapiens OX=9606 GN=BTN2A1 PE=1 SV=3		SUBCELLULAR LOCATION: Membrane {ECO:0000250}; Single-pass type I membrane protein {ECO:0000250}.		adaptive immune response [GO:0002250]; lipid metabolic process [GO:0006629]; regulation of cytokine production [GO:0001817]; T cell receptor signaling pathway [GO:0050852]	signaling receptor binding [GO:0005102]	external side of plasma membrane [GO:0009897]; integral component of plasma membrane [GO:0005887]; plasma membrane [GO:0005886]	GO:0001817; GO:0002250; GO:0005102; GO:0005886; GO:0005887; GO:0006629; GO:0009897; GO:0050852	R-HSA-8851680;	hsa:11120;	19.8806	20.0812	20.192	19.9104	19.9507	19.8877	19.8287	19.6661	19.6376	19.4876	19.6914	19.4583	19.5307	19.4332
COL4A5_P29400	-0.0277652	0.513815	0.0519136	0.348994	-0.0173082	1.86834	1.88301	-0.60385	-0.641805	-1.91388	-0.197176	-1.02551	-0.0314989	-0.207268	COL4A5	Collagen alpha-5(IV) chain	P29400	1.04306	0.000256524	0.0131506	-0.560724	sp|P29400|CO4A5_HUMAN Collagen alpha-5(IV) chain OS=Homo sapiens OX=9606 GN=COL4A5 PE=1 SV=2	FUNCTION: Type IV collagen is the major structural component of glomerular basement membranes (GBM), forming a 'chicken-wire' meshwork together with laminins, proteoglycans and entactin/nidogen.	SUBCELLULAR LOCATION: Secreted, extracellular space, extracellular matrix, basement membrane.	DISEASE: Alport syndrome 1, X-linked (ATS1) [MIM:301050]: A syndrome that is characterized by progressive glomerulonephritis, renal failure, sensorineural deafness, specific eye abnormalities (lenticonous and macular flecks), and glomerular basement membrane defects. The disorder shows considerable heterogeneity in that families differ in the age of end-stage renal disease and the occurrence of d…	collagen-activated tyrosine kinase receptor signaling pathway [GO:0038063]; collagen fibril organization [GO:0030199]; extracellular matrix organization [GO:0030198]; neuromuscular junction development [GO:0007528]	extracellular matrix structural constituent [GO:0005201]; extracellular matrix structural constituent conferring tensile strength [GO:0030020]	basement membrane [GO:0005604]; collagen-containing extracellular matrix [GO:0062023]; collagen type IV trimer [GO:0005587]; endoplasmic reticulum lumen [GO:0005788]; extracellular matrix [GO:0031012]; extracellular region [GO:0005576]; extracellular space [GO:0005615]; neuromuscular junction [GO:0031594]	GO:0005201; GO:0005576; GO:0005587; GO:0005604; GO:0005615; GO:0005788; GO:0007528; GO:0030020; GO:0030198; GO:0030199; GO:0031012; GO:0031594; GO:0038063; GO:0062023	R-HSA-1442490;R-HSA-1474244;R-HSA-1650814;R-HSA-186797;R-HSA-2022090;R-HSA-216083;R-HSA-2214320;R-HSA-2243919;R-HSA-3000157;R-HSA-3000171;R-HSA-3000178;R-HSA-419037;R-HSA-8948216;R-HSA-9010553;	hsa:1287;	13.2894	13.5194	13.3233	13.4494	13.2939	14.0947	14.1009	13.0448	13.0286	12.4884	13.2175	12.8657	13.2878	13.2132
STXBP2_Q15833	0.0759861	0.817857	1.48766	0.319615	0.68072	1.21266	1.38383	-0.476381	-0.74447	-1.71041	-0.752869	-1.05467	-0.679577	-0.55995	STXBP2	Syntaxin-binding protein 2	Q15833	1.02765	0.000256998	0.0131506	-0.505814	sp|Q15833|STXB2_HUMAN Syntaxin-binding protein 2 OS=Homo sapiens OX=9606 GN=STXBP2 PE=1 SV=2	FUNCTION: Involved in intracellular vesicle trafficking and vesicle fusion with membranes. Contributes to the granule exocytosis machinery through interaction with soluble N-ethylmaleimide-sensitive factor attachment protein receptor (SNARE) proteins that regulate membrane fusion. Regulates cytotoxic granule exocytosis in natural killer (NK) cells. {ECO:0000269|PubMed:19804848, ECO:0000269|PubMed…		DISEASE: Hemophagocytic lymphohistiocytosis, familial, 5 (FHL5) [MIM:613101]: A rare disorder characterized by immune dysregulation with hypercytokinemia, defective function of natural killer cell, and massive infiltration of several organs by activated lymphocytes and macrophages. The clinical features of the disease include fever, hepatosplenomegaly, cytopenia, and less frequently neurological …	intracellular protein transport [GO:0006886]; leukocyte mediated cytotoxicity [GO:0001909]; neurotransmitter secretion [GO:0007269]; neutrophil degranulation [GO:0043312]; platelet degranulation [GO:0002576]; regulation of mast cell degranulation [GO:0043304]; vesicle docking involved in exocytosis [GO:0006904]; vesicle-mediated transport [GO:0016192]	syntaxin-1 binding [GO:0017075]; syntaxin-3 binding [GO:0030348]; syntaxin binding [GO:0019905]	azurophil granule [GO:0042582]; cytolytic granule [GO:0044194]; cytosol [GO:0005829]; extracellular exosome [GO:0070062]; extracellular region [GO:0005576]; plasma membrane [GO:0005886]; presynapse [GO:0098793]; secretory granule [GO:0030141]; specific granule [GO:0042581]; tertiary granule [GO:0070820]	GO:0001909; GO:0002576; GO:0005576; GO:0005829; GO:0005886; GO:0006886; GO:0006904; GO:0007269; GO:0016192; GO:0017075; GO:0019905; GO:0030141; GO:0030348; GO:0042581; GO:0042582; GO:0043304; GO:0043312; GO:0044194; GO:0070062; GO:0070820; GO:0098793	R-HSA-114608;R-HSA-449836;	hsa:6813;	18.5666	18.7863	18.9846	18.6387	18.7457	18.9032	18.9539	18.403	18.3236	18.0376	18.3212	18.2318	18.3429	18.3783
FBXL22_Q6P050	-0.462587	-1.71215	-0.978426	0.475362	-0.132464	-0.568702	-0.951749	0.992338	-0.291833	-0.62315	1.26133	0.848975	1.8956	0.247463	FBXL22	F-box and leucine-rich protein 22	Q6P050	1.06338	0.000259357	0.0131517	0.746804	sp|Q6P050|FXL22_HUMAN F-box and leucine-rich protein 22 OS=Homo sapiens OX=9606 GN=FBXL22 PE=1 SV=2	FUNCTION: Substrate-recognition component of the SCF (SKP1-CUL1-F-box protein)-type E3 ubiquitin ligase complex. Promotes ubiquitination of sarcomeric proteins alpha-actinin-2 (ACTN2) and filamin-C (FLNC). {ECO:0000269|PubMed:22972877}.	SUBCELLULAR LOCATION: Cytoplasm, myofibril, sarcomere, Z line {ECO:0000269|PubMed:22972877}.		entrainment of circadian clock by photoperiod [GO:0043153]; G2/M transition of mitotic cell cycle [GO:0000086]; post-translational protein modification [GO:0043687]; proteasome-mediated ubiquitin-dependent protein catabolic process [GO:0043161]; protein polyubiquitination [GO:0000209]; regulation of cell cycle [GO:0051726]; SCF-dependent proteasomal ubiquitin-dependent protein catabolic process […	ubiquitin protein ligase activity [GO:0061630]	cytosol [GO:0005829]; nucleolus [GO:0005730]; nucleus [GO:0005634]; SCF ubiquitin ligase complex [GO:0019005]; Z disc [GO:0030018]	GO:0000086; GO:0000209; GO:0005634; GO:0005730; GO:0005829; GO:0019005; GO:0030018; GO:0031146; GO:0043153; GO:0043161; GO:0043687; GO:0051726; GO:0061630	R-HSA-8951664;R-HSA-983168;	hsa:283807;	11.8771	11.123	11.5658	12.4433	12.0764	11.8131	11.5819	12.7553	11.9802	11.7802	12.9176	12.6687	13.3004	12.3057
YES1_P07947	0.180557	1.69433	0.826916	1.18549	0.746147	0.622357	0.561325	-0.643037	-0.116749	-1.09667	-0.178285	-1.54708	-1.4299	-0.805402	YES1	Tyrosine-protein kinase Yes	P07947	1.0178	0.000262935	0.0131517	-0.323371	sp|P07947|YES_HUMAN Tyrosine-protein kinase Yes OS=Homo sapiens OX=9606 GN=YES1 PE=1 SV=3	FUNCTION: Non-receptor protein tyrosine kinase that is involved in the regulation of cell growth and survival, apoptosis, cell-cell adhesion, cytoskeleton remodeling, and differentiation. Stimulation by receptor tyrosine kinases (RTKs) including EGRF, PDGFR, CSF1R and FGFR leads to recruitment of YES1 to the phosphorylated receptor, and activation and phosphorylation of downstream substrates. Upo…	SUBCELLULAR LOCATION: Cell membrane. Cytoplasm, cytoskeleton, microtubule organizing center, centrosome. Cytoplasm, cytosol. Note=Newly synthesized protein initially accumulates in the Golgi region and traffics to the plasma membrane through the exocytic pathway.		cell differentiation [GO:0030154]; cellular protein modification process [GO:0006464]; ephrin receptor signaling pathway [GO:0048013]; Fc-gamma receptor signaling pathway involved in phagocytosis [GO:0038096]; innate immune response [GO:0045087]; leukocyte migration [GO:0050900]; negative regulation of inflammatory response to antigenic stimulus [GO:0002862]; regulation of vascular permeability […	ATP binding [GO:0005524]; enzyme binding [GO:0019899]; ion channel binding [GO:0044325]; non-membrane spanning protein tyrosine kinase activity [GO:0004715]; phosphotyrosine residue binding [GO:0001784]; protein tyrosine kinase activity [GO:0004713]; signaling receptor binding [GO:0005102]; transmembrane receptor protein tyrosine kinase activity [GO:0004714]	cytosol [GO:0005829]; extracellular exosome [GO:0070062]; extrinsic component of cytoplasmic side of plasma membrane [GO:0031234]; focal adhesion [GO:0005925]; Golgi apparatus [GO:0005794]; microtubule organizing center [GO:0005815]; plasma membrane [GO:0005886]	GO:0001784; GO:0002862; GO:0004713; GO:0004714; GO:0004715; GO:0005102; GO:0005524; GO:0005794; GO:0005815; GO:0005829; GO:0005886; GO:0005925; GO:0006464; GO:0007169; GO:0019899; GO:0030154; GO:0031234; GO:0031295; GO:0038096; GO:0043114; GO:0044325; GO:0045087; GO:0048013; GO:0050900; GO:0070062	R-HSA-1227986;R-HSA-1433557;R-HSA-1433559;R-HSA-2029481;R-HSA-210990;R-HSA-2682334;R-HSA-389356;R-HSA-389513;R-HSA-3928662;R-HSA-3928663;R-HSA-3928665;R-HSA-8940973;R-HSA-912631;R-HSA-9664323;R-HSA-9664422;R-HSA-9670439;	hsa:7525;	18.3597	18.6543	18.4855	18.5553	18.4698	18.4457	18.4338	18.1995	18.3019	18.1112	18.2899	18.0236	18.0464	18.1679
AKAP5_P24588	0.233364	1.89635	0.226132	0.0813224	0.220912	0.481646	1.32214	-0.542793	0.885873	-1.4183	-0.345758	-1.12948	-1.64484	-0.266566	AKAP5	A-kinase anchor protein 5	P24588	1.02901	0.000263665	0.0131517	-0.444005	sp|P24588|AKAP5_HUMAN A-kinase anchor protein 5 OS=Homo sapiens OX=9606 GN=AKAP5 PE=1 SV=3	FUNCTION: Multivalent scaffold protein that anchors the cAMP-dependent protein kinase/PKA to cytoskeletal and/or organelle-associated proteins, targeting the signal carried by cAMP to specific intracellular effectors (PubMed:1512224). Association with the beta2-adrenergic receptor (beta2-AR) not only regulates beta2-AR signaling pathway, but also the activation by PKA by switching off the beta2-A…	SUBCELLULAR LOCATION: Postsynaptic recycling endosome membrane {ECO:0000269|PubMed:21771783, ECO:0000269|PubMed:25589740}; Lipid-anchor {ECO:0000269|PubMed:21771783}. Note=Associates with lipid rafts. {ECO:0000269|PubMed:21771783}.		adenylate cyclase-inhibiting G protein-coupled receptor signaling pathway [GO:0007193]; chemical synaptic transmission [GO:0007268]; negative regulation of adenylate cyclase activity [GO:0007194]; positive regulation of adenylate cyclase activity [GO:0045762]; positive regulation of endosome to plasma membrane protein transport [GO:1905751]; positive regulation of long-term synaptic potentiation …	adenylate cyclase binding [GO:0008179]; beta-2 adrenergic receptor binding [GO:0031698]; calmodulin binding [GO:0005516]; GABA receptor binding [GO:0050811]; glutamate receptor binding [GO:0035254]; molecular adaptor activity [GO:0060090]; protein kinase A binding [GO:0051018]; protein kinase A regulatory subunit binding [GO:0034237]; protein phosphatase 2B binding [GO:0030346]; scaffold protein …	cytoplasmic side of plasma membrane [GO:0009898]; cytosol [GO:0005829]; dendrite membrane [GO:0032590]; dendritic spine [GO:0043197]; excitatory synapse [GO:0060076]; membrane raft [GO:0045121]; plasma membrane [GO:0005886]; postsynaptic density [GO:0014069]; postsynaptic recycling endosome [GO:0098837]	GO:0005516; GO:0005829; GO:0005886; GO:0007165; GO:0007193; GO:0007194; GO:0007268; GO:0008179; GO:0009898; GO:0010738; GO:0014069; GO:0017124; GO:0030346; GO:0031698; GO:0032590; GO:0034237; GO:0035254; GO:0043197; GO:0045121; GO:0045762; GO:0050811; GO:0051018; GO:0060076; GO:0060090; GO:0097110; GO:0098837; GO:1900273; GO:1903078; GO:1905751	R-HSA-381676;R-HSA-399719;R-HSA-9010642;	hsa:9495;	15.611	16.1902	15.6085	15.5581	15.6067	15.6975	15.9902	15.3407	15.8383	15.0358	15.4093	15.1364	14.9569	15.4369
F11R_Q9Y624	-0.0156643	1.82696	0.468888	0.476815	0.503795	0.825171	1.33758	-0.747483	0.0237327	-1.74585	-0.446584	-1.02271	-1.2601	-0.224535	F11R	Junctional adhesion molecule A	Q9Y624	1.01826	0.00026475	0.0131517	-0.35089	sp|Q9Y624|JAM1_HUMAN Junctional adhesion molecule A OS=Homo sapiens OX=9606 GN=F11R PE=1 SV=1	FUNCTION: Seems to play a role in epithelial tight junction formation. Appears early in primordial forms of cell junctions and recruits PARD3 (PubMed:11489913). The association of the PARD6-PARD3 complex may prevent the interaction of PARD3 with JAM1, thereby preventing tight junction assembly (By similarity). Plays a role in regulating monocyte transmigration involved in integrity of epithelial …	SUBCELLULAR LOCATION: Cell junction, tight junction {ECO:0000269|PubMed:11171323}. Cell membrane {ECO:0000269|PubMed:11171323}; Single-pass type I membrane protein {ECO:0000269|PubMed:11171323}. Note=Localized at tight junctions of both epithelial and endothelial cells. {ECO:0000269|PubMed:11171323}.		actomyosin structure organization [GO:0031032]; bicellular tight junction assembly [GO:0070830]; cell-cell adhesion [GO:0098609]; cellular response to mechanical stimulus [GO:0071260]; establishment of endothelial intestinal barrier [GO:0090557]; extracellular matrix organization [GO:0030198]; inflammatory response [GO:0006954]; intestinal absorption [GO:0050892]; leukocyte cell-cell adhesion [GO…	cadherin binding [GO:0045296]; integrin binding [GO:0005178]; PDZ domain binding [GO:0030165]; protein homodimerization activity [GO:0042803]; virus receptor activity [GO:0001618]	bicellular tight junction [GO:0005923]; cell-cell junction [GO:0005911]; cell junction [GO:0030054]; cytoplasmic vesicle [GO:0031410]; extracellular exosome [GO:0070062]; integral component of membrane [GO:0016021]; plasma membrane [GO:0005886]; protein-containing complex [GO:0032991]; slit diaphragm [GO:0036057]; tight junction [GO:0070160]	GO:0001618; GO:0001817; GO:0005178; GO:0005886; GO:0005911; GO:0005923; GO:0006954; GO:0007159; GO:0007179; GO:0008360; GO:0009314; GO:0016021; GO:0030054; GO:0030165; GO:0030198; GO:0031032; GO:0031410; GO:0032956; GO:0032991; GO:0034260; GO:0035025; GO:0035633; GO:0035683; GO:0036057; GO:0042803; GO:0043547; GO:0045296; GO:0045777; GO:0050892; GO:0050900; GO:0051493; GO:0051497; GO:0070062; GO:…	R-HSA-202733;R-HSA-216083;R-HSA-2173791;R-HSA-420029;	hsa:50848;	19.392	19.8092	19.5017	19.5035	19.5096	19.5824	19.6984	19.2263	19.4009	19.0002	19.2944	19.1639	19.1102	19.3447
FAM73B_Q7L4E1	-0.286263	-1.31509	-0.92287	-0.107292	-0.481224	-1.13856	-1.30032	1.25959	-0.212691	0.505626	1.79245	0.705207	1.18766	0.313776	FAM73B	Protein FAM73B	Q7L4E1	1.0184	0.00026542	0.0131517	0.309646	sp|Q7L4E1|MIGA2_HUMAN Mitoguardin 2 OS=Homo sapiens OX=9606 GN=MIGA2 PE=1 SV=1	FUNCTION: Regulator of mitochondrial fusion: acts by forming homo- and heterodimers at the mitochondrial outer membrane and facilitating the formation of PLD6/MitoPLD dimers. May act by regulating phospholipid metabolism via PLD6/MitoPLD. {ECO:0000269|PubMed:26711011}.	SUBCELLULAR LOCATION: Mitochondrion outer membrane {ECO:0000269|PubMed:26711011}; Multi-pass membrane protein {ECO:0000255}.		bone development [GO:0060348]; mitochondrial fusion [GO:0008053]	protein heterodimerization activity [GO:0046982]; protein homodimerization activity [GO:0042803]	integral component of plasma membrane [GO:0005887]; mitochondrial outer membrane [GO:0005741]	GO:0005741; GO:0005887; GO:0008053; GO:0042803; GO:0046982; GO:0060348	R-HSA-1483166;	hsa:84895;	16.9264	16.7255	16.8021	16.9613	16.8883	16.76	16.7284	17.2281	16.9407	17.081	17.3322	17.1199	17.2141	17.0435
LOXL3_P58215	0.118518	1.80555	0.861013	-0.658564	0.162671	1.32028	0.99296	-1.23885	-0.0470163	0.364628	-1.27125	-0.960909	-1.24228	-0.206751	LOXL3	Lysyl oxidase homolog 3	P58215	1.04851	0.000269972	0.0132931	-0.787095	sp|P58215|LOXL3_HUMAN Lysyl oxidase homolog 3 OS=Homo sapiens OX=9606 GN=LOXL3 PE=1 SV=1	FUNCTION: Protein-lysine 6-oxidase that mediates the oxidation of peptidyl lysine residues to allysine in target proteins (PubMed:17018530, PubMed:28065600). Catalyzes the post-translational oxidative deamination of peptidyl lysine residues in precursors of elastin and different types of collagens, a prerequisite in the formation of cross-links between collagens and elastin (PubMed:17018530). Req…	SUBCELLULAR LOCATION: Secreted, extracellular space {ECO:0000250|UniProtKB:Q9Z175}. Cytoplasm {ECO:0000269|PubMed:28065600}. Nucleus {ECO:0000269|PubMed:28065600}. Note=It is unclear how LOXL3 is both intracellular (cytoplasmic and nuclear) and extracellular: it contains a clear signal sequence and is predicted to localize in the extracellular medium. However, the intracellular location is clearl…	DISEASE: Note=Defects in LOXL3 are found in a family with an autosomal recessive form of Stickler syndrome, an inherited disorder that associates ocular signs with more or less complete forms of Pierre Robin sequence and sensorineural deafness (PubMed:25663169). Pierre Robin sequence includes an opening in the roof of the mouth (a cleft palate) (PubMed:25663169). The degree of hearing loss varies…	collagen fibril organization [GO:0030199]; epithelial to mesenchymal transition [GO:0001837]; fibronectin fibril organization [GO:1905590]; inflammatory response [GO:0006954]; lung development [GO:0030324]; negative regulation of T-helper 17 cell lineage commitment [GO:2000329]; negative regulation of transcription, DNA-templated [GO:0045892]; peptidyl-lysine oxidation [GO:0018057]; positive regu…	copper ion binding [GO:0005507]; fibronectin binding [GO:0001968]; protein-lysine 6-oxidase activity [GO:0004720]; scavenger receptor activity [GO:0005044]	cytoplasm [GO:0005737]; extracellular region [GO:0005576]; extracellular space [GO:0005615]; membrane [GO:0016020]; nucleus [GO:0005634]	GO:0001837; GO:0001968; GO:0004720; GO:0005044; GO:0005507; GO:0005576; GO:0005615; GO:0005634; GO:0005737; GO:0006954; GO:0016020; GO:0018057; GO:0021510; GO:0030199; GO:0030324; GO:0045892; GO:0060021; GO:0061053; GO:1905590; GO:2000329; GO:2001046	R-HSA-1566948;R-HSA-2243919;	hsa:84695;	16.6883	17.6981	17.1328	16.2232	16.7148	17.4077	17.2117	15.8759	16.5892	16.8356	15.8565	16.0422	15.8738	16.4936
RILP_Q96NA2	-0.565978	-1.51545	-0.871582	-0.840332	-0.219346	-1.21121	-0.556669	0.595635	-0.023802	1.99853	0.698085	0.888877	1.08357	0.539664	RILP	Rab-interacting lysosomal protein	Q96NA2	1.02453	0.000281454	0.0137055	0.385881	sp|Q96NA2|RILP_HUMAN Rab-interacting lysosomal protein OS=Homo sapiens OX=9606 GN=RILP PE=1 SV=1	FUNCTION: Rab effector playing a role in late endocytic transport to degradative compartments (PubMed:11696325, PubMed:14668488, PubMed:27113757, PubMed:11179213, PubMed:12944476). Involved in the regulation of lysosomal morphology and distribution (PubMed:14668488, PubMed:27113757). Induces recruitment of dynein-dynactin motor complexes to Rab7A-containing late endosome and lysosome compartments…	SUBCELLULAR LOCATION: Late endosome membrane {ECO:0000269|PubMed:11179213, ECO:0000269|PubMed:12944476}. Lysosome membrane {ECO:0000269|PubMed:11179213, ECO:0000269|PubMed:12944476, ECO:0000269|PubMed:14668488}. Cytoplasmic vesicle, phagosome membrane {ECO:0000269|PubMed:12944476}. Note=Associated with late endosomal, lysosomal and phagosomal membranes. The interaction with RAB7A is necessary for…		antigen processing and presentation of exogenous peptide antigen via MHC class II [GO:0019886]; cilium assembly [GO:0060271]; early endosome to late endosome transport [GO:0045022]; endosome to lysosome transport [GO:0008333]; endosome transport via multivesicular body sorting pathway [GO:0032509]; intralumenal vesicle formation [GO:0070676]; negative regulation of protein catabolic process [GO:0…	dynein light intermediate chain binding [GO:0051959]; protein dimerization activity [GO:0046983]; small GTPase binding [GO:0031267]	ciliary basal body [GO:0036064]; cytoplasm [GO:0005737]; cytosol [GO:0005829]; late endosome [GO:0005770]; late endosome membrane [GO:0031902]; lysosomal membrane [GO:0005765]; lysosome [GO:0005764]; phagocytic vesicle membrane [GO:0030670]; protein-containing complex [GO:0032991]	GO:0005737; GO:0005764; GO:0005765; GO:0005770; GO:0005829; GO:0008333; GO:0010796; GO:0015031; GO:0019886; GO:0030670; GO:0031267; GO:0031902; GO:0032509; GO:0032991; GO:0036064; GO:0042177; GO:0045022; GO:0045732; GO:0046983; GO:0051959; GO:0060271; GO:0070676	R-HSA-2132295;	hsa:83547;	15.7902	15.5684	15.7188	15.7261	15.8712	15.6395	15.7924	16.0616	15.9169	16.3894	16.0855	16.1301	16.1756	16.0485
HIST1H1C_P16403	1.07819	1.14383	0.585006	0.897815	0.720755	0.519005	0.272536	-0.53459	0.0997039	-1.70232	0.296206	-0.887985	-2	-0.421752	HIST1H1C	Histone H1.2	P16403	1.02887	0.000281848	0.0137055	-0.568335	sp|P16403|H12_HUMAN Histone H1.2 OS=Homo sapiens OX=9606 GN=HIST1H1C PE=1 SV=2	FUNCTION: Histone H1 protein binds to linker DNA between nucleosomes forming the macromolecular structure known as the chromatin fiber. Histones H1 are necessary for the condensation of nucleosome chains into higher-order structured fibers. Acts also as a regulator of individual gene transcription through chromatin remodeling, nucleosome spacing and DNA methylation (By similarity). {ECO:0000250}.	SUBCELLULAR LOCATION: Nucleus. Chromosome. Note=Mainly localizes in euchromatin. Distribution goes in parallel with DNA concentration.		chromosome condensation [GO:0030261]; negative regulation of chromatin silencing [GO:0031936]; negative regulation of DNA recombination [GO:0045910]; nucleosome assembly [GO:0006334]; nucleosome positioning [GO:0016584]	chromatin DNA binding [GO:0031490]; double-stranded DNA binding [GO:0003690]; nucleosomal DNA binding [GO:0031492]; RNA binding [GO:0003723]	euchromatin [GO:0000791]; nucleosome [GO:0000786]; nucleus [GO:0005634]	GO:0000786; GO:0000791; GO:0003690; GO:0003723; GO:0005634; GO:0006334; GO:0016584; GO:0030261; GO:0031490; GO:0031492; GO:0031936; GO:0045910	R-HSA-140342;R-HSA-2559584;	hsa:3006;	20.3839	20.4089	20.1958	20.3151	20.2476	20.1707	20.0767	19.769	20.0108	19.3237	20.0857	19.6342	19.1849	19.812
ICAM1_P05362	-0.508328	0.744634	2	-0.50764	0.411817	1.03757	1.59338	-0.903079	-0.218225	-0.166572	-1.05185	-0.850653	-1.00663	-0.589924	ICAM1	Intercellular adhesion molecule 1	P05362	1.06326	0.000284144	0.0137319	-1.09757	sp|P05362|ICAM1_HUMAN Intercellular adhesion molecule 1 OS=Homo sapiens OX=9606 GN=ICAM1 PE=1 SV=2	FUNCTION: ICAM proteins are ligands for the leukocyte adhesion protein LFA-1 (integrin alpha-L/beta-2). During leukocyte trans-endothelial migration, ICAM1 engagement promotes the assembly of endothelial apical cups through ARHGEF26/SGEF and RHOG activation. {ECO:0000269|PubMed:11173916, ECO:0000269|PubMed:17875742}.; FUNCTION: (Microbial infection) Acts as a receptor for major receptor group rhi…	SUBCELLULAR LOCATION: Membrane; Single-pass type I membrane protein.		acute inflammatory response to antigenic stimulus [GO:0002438]; adhesion of symbiont to host [GO:0044406]; cell adhesion [GO:0007155]; cell adhesion mediated by integrin [GO:0033627]; cell aging [GO:0007569]; cellular response to alkaloid [GO:0071312]; cellular response to amyloid-beta [GO:1904646]; cellular response to dexamethasone stimulus [GO:0071549]; cellular response to glucose stimulus [G…	integrin binding [GO:0005178]; signaling receptor activity [GO:0038023]; transmembrane signaling receptor activity [GO:0004888]; virus receptor activity [GO:0001618]	cell surface [GO:0009986]; collagen-containing extracellular matrix [GO:0062023]; external side of plasma membrane [GO:0009897]; extracellular exosome [GO:0070062]; extracellular space [GO:0005615]; focal adhesion [GO:0005925]; immunological synapse [GO:0001772]; integral component of plasma membrane [GO:0005887]; membrane [GO:0016020]; membrane raft [GO:0045121]; plasma membrane [GO:0005886]	GO:0001541; GO:0001618; GO:0001772; GO:0001910; GO:0001975; GO:0002291; GO:0002438; GO:0002457; GO:0002693; GO:0004888; GO:0005178; GO:0005615; GO:0005886; GO:0005887; GO:0005925; GO:0007155; GO:0007157; GO:0007159; GO:0007569; GO:0007605; GO:0008360; GO:0009897; GO:0009986; GO:0010212; GO:0010477; GO:0016020; GO:0019221; GO:0022614; GO:0030198; GO:0030838; GO:0031669; GO:0032868; GO:0033627; GO:…	R-HSA-198933;R-HSA-216083;R-HSA-6783783;R-HSA-6785807;R-HSA-877300;	hsa:3383;	17.49	18.4955	19.5153	17.4905	18.2284	18.7305	19.1766	17.1732	17.7228	17.7642	17.0538	17.2152	17.0901	17.4245
KRAS_P01116	-0.375031	1.76301	0.903369	0.348252	0.801778	0.992831	1.17716	-0.80078	0.00726496	-1.271	-1.21557	-0.704194	-1.16396	-0.463123	KRAS	GTPase KRas;GTPase KRas, N-terminally processed	P01116	1.01924	0.000288708	0.0138668	-0.347949	sp|P01116|RASK_HUMAN GTPase KRas OS=Homo sapiens OX=9606 GN=KRAS PE=1 SV=1	FUNCTION: Ras proteins bind GDP/GTP and possess intrinsic GTPase activity (PubMed:20949621). Plays an important role in the regulation of cell proliferation (PubMed:23698361, PubMed:22711838). Plays a role in promoting oncogenic events by inducing transcriptional silencing of tumor suppressor genes (TSGs) in colorectal cancer (CRC) cells in a ZNF304-dependent manner (PubMed:24623306). {ECO:000026…	SUBCELLULAR LOCATION: Cell membrane {ECO:0000269|PubMed:22431598, ECO:0000269|PubMed:23698361}; Lipid-anchor {ECO:0000305|PubMed:23698361}; Cytoplasmic side {ECO:0000305|PubMed:23698361}. Cytoplasm, cytosol {ECO:0000269|PubMed:23698361}.; SUBCELLULAR LOCATION: [Isoform 2B]: Cell membrane {ECO:0000269|PubMed:28619714}; Lipid-anchor {ECO:0000305|PubMed:28619714}.	DISEASE: Leukemia, acute myelogenous (AML) [MIM:601626]: A subtype of acute leukemia, a cancer of the white blood cells. AML is a malignant disease of bone marrow characterized by maturational arrest of hematopoietic precursors at an early stage of development. Clonal expansion of myeloid blasts occurs in bone marrow, blood, and other tissue. Myelogenous leukemias develop from changes in cells th…	actin cytoskeleton organization [GO:0030036]; cytokine-mediated signaling pathway [GO:0019221]; endocrine signaling [GO:0038002]; epithelial tube branching involved in lung morphogenesis [GO:0060441]; female pregnancy [GO:0007565]; forebrain astrocyte development [GO:0021897]; homeostasis of number of cells within a tissue [GO:0048873]; liver development [GO:0001889]; MAPK cascade [GO:0000165]; n…	GDP binding [GO:0019003]; GMP binding [GO:0019002]; G protein activity [GO:0003925]; GTPase activity [GO:0003924]; GTP binding [GO:0005525]; identical protein binding [GO:0042802]; LRR domain binding [GO:0030275]; protein-containing complex binding [GO:0044877]	cytoplasm [GO:0005737]; cytosol [GO:0005829]; endoplasmic reticulum membrane [GO:0005789]; extrinsic component of cytoplasmic side of plasma membrane [GO:0031234]; focal adhesion [GO:0005925]; Golgi membrane [GO:0000139]; membrane [GO:0016020]; membrane raft [GO:0045121]; mitochondrial outer membrane [GO:0005741]; plasma membrane [GO:0005886]	GO:0000139; GO:0000165; GO:0001889; GO:0001934; GO:0002223; GO:0003924; GO:0003925; GO:0005525; GO:0005737; GO:0005741; GO:0005789; GO:0005829; GO:0005886; GO:0005925; GO:0007265; GO:0007565; GO:0008284; GO:0008542; GO:0010628; GO:0016020; GO:0019002; GO:0019003; GO:0019221; GO:0021897; GO:0030036; GO:0030275; GO:0031234; GO:0031647; GO:0032228; GO:0035022; GO:0035900; GO:0038002; GO:0042802; GO:…	R-HSA-112412;R-HSA-1169092;R-HSA-1236382;R-HSA-1250196;R-HSA-1250347;R-HSA-1433557;R-HSA-167044;R-HSA-171007;R-HSA-179812;R-HSA-180336;R-HSA-186763;R-HSA-1963640;R-HSA-210993;R-HSA-2179392;R-HSA-2424491;R-HSA-2428933;R-HSA-2871796;R-HSA-375165;R-HSA-4086398 [P01116-2];R-HSA-442982;R-HSA-5218921;R-HSA-5621575;R-HSA-5637810;R-HSA-5654688;R-HSA-5654693;R-HSA-5654699;R-HSA-5654700;R-HSA-5654704;R-HSA…	hsa:3845;	18.1818	18.6458	18.4592	18.3387	18.4372	18.4786	18.5186	18.0894	18.2647	17.9873	17.9993	18.1103	18.0105	18.1626
KCNAB2_Q13303	-0.147383	0.515211	1.10106	-0.520536	0.317101	1.54029	1.51472	-0.911663	-0.93129	-1.16177	-1.13152	-1.11978	-0.0023707	0.937933	KCNAB2	Voltage-gated potassium channel subunit beta-2	Q13303	1.03527	0.000296802	0.0140122	-0.515576	sp|Q13303|KCAB2_HUMAN Voltage-gated potassium channel subunit beta-2 OS=Homo sapiens OX=9606 GN=KCNAB2 PE=1 SV=2	FUNCTION: Cytoplasmic potassium channel subunit that modulates the characteristics of the channel-forming alpha-subunits (PubMed:7649300, PubMed:11825900). Contributes to the regulation of nerve signaling, and prevents neuronal hyperexcitability (By similarity). Promotes expression of the pore-forming alpha subunits at the cell membrane, and thereby increases channel activity (By similarity). Pro…	SUBCELLULAR LOCATION: Cytoplasm {ECO:0000250|UniProtKB:P62483}. Membrane {ECO:0000269|PubMed:11086297, ECO:0000269|PubMed:21357749}; Peripheral membrane protein {ECO:0000305}; Cytoplasmic side {ECO:0000305}. Cell membrane {ECO:0000250|UniProtKB:P62483}; Peripheral membrane protein {ECO:0000305}; Cytoplasmic side {ECO:0000305}. Cell projection, axon {ECO:0000269|PubMed:11086297}. Cell junction, sy…		NADPH oxidation [GO:0070995]; neutrophil degranulation [GO:0043312]; potassium ion transmembrane transport [GO:0071805]; regulation of action potential [GO:0098900]; regulation of potassium ion transmembrane transport [GO:1901379]; regulation of protein localization to cell surface [GO:2000008]	aldo-keto reductase (NADP) activity [GO:0004033]; D-threo-aldose 1-dehydrogenase activity [GO:0047834]; ion channel binding [GO:0044325]; potassium channel regulator activity [GO:0015459]; voltage-gated potassium channel activity [GO:0005249]	cytoskeleton [GO:0005856]; cytosol [GO:0005829]; extrinsic component of cytoplasmic side of plasma membrane [GO:0031234]; juxtaparanode region of axon [GO:0044224]; membrane [GO:0016020]; pinceau fiber [GO:1990031]; plasma membrane [GO:0005886]; specific granule membrane [GO:0035579]; synapse [GO:0045202]; tertiary granule membrane [GO:0070821]; voltage-gated potassium channel complex [GO:0008076]	GO:0004033; GO:0005249; GO:0005829; GO:0005856; GO:0005886; GO:0008076; GO:0015459; GO:0016020; GO:0031234; GO:0035579; GO:0043312; GO:0044224; GO:0044325; GO:0045202; GO:0047834; GO:0070821; GO:0070995; GO:0071805; GO:0098900; GO:1901379; GO:1990031; GO:2000008	R-HSA-1296072;R-HSA-6798695;	hsa:8514;	14.813	15.0897	15.3344	14.6571	15.007	15.5178	15.5072	14.4938	14.4856	14.3893	14.4019	14.4068	14.8735	15.2663
COLEC11_Q9BWP8	0.121293	2	1.48924	-0.555727	0.30125	0.264627	0.836929	-0.553886	-0.239886	-0.686047	-1.55852	-0.568223	-0.781975	-0.363974	COLEC11	Collectin-11	Q9BWP8	1.04069	0.000297246	0.0140122	-0.588396	sp|Q9BWP8|COL11_HUMAN Collectin-11 OS=Homo sapiens OX=9606 GN=COLEC11 PE=1 SV=1	FUNCTION: Lectin that plays a role in innate immunity, apoptosis and embryogenesis (PubMed:23954398, PubMed:25912189, PubMed:21258343). Calcium-dependent lectin that binds self and non-self glycoproteins presenting high mannose oligosaccharides with at least one terminal alpha-1,2-linked mannose epitope (PubMed:25912189). Primarily recognizes the terminal disaccharide of the glycan (PubMed:259121…	SUBCELLULAR LOCATION: Secreted {ECO:0000269|PubMed:25912189}.	DISEASE: 3MC syndrome 2 (3MC2) [MIM:265050]: A form of 3MC syndrome, an autosomal recessive disorder characterized by facial dysmorphism, craniosynostosis, learning disability, and genital, limb and vesicorenal anomalies. Facial features include hypertelorism, blepharophimosis, blepharoptosis and highly arched eyebrows, cleft lip and/or palate. The term 3MC syndrome includes Carnevale, Mingarelli…	antimicrobial humoral response [GO:0019730]; complement activation [GO:0006956]; complement activation, lectin pathway [GO:0001867]; developmental process [GO:0032502]; execution phase of apoptosis [GO:0097194]; multicellular organism development [GO:0007275]; receptor-mediated endocytosis [GO:0006898]	calcium-dependent carbohydrate binding [GO:0120153]; calcium ion binding [GO:0005509]; DNA binding [GO:0003677]; fucose binding [GO:0042806]; mannose binding [GO:0005537]; oligosaccharide binding [GO:0070492]	collagen trimer [GO:0005581]; extracellular region [GO:0005576]; extracellular space [GO:0005615]	GO:0001867; GO:0003677; GO:0005509; GO:0005537; GO:0005576; GO:0005581; GO:0005615; GO:0006898; GO:0006956; GO:0007275; GO:0019730; GO:0032502; GO:0042806; GO:0070492; GO:0097194; GO:0120153	R-HSA-166662;R-HSA-166663;R-HSA-3000480;	hsa:78989;	14.8066	15.7485	15.3994	14.5133	14.8846	14.8687	15.1167	14.5141	14.6501	14.4568	14.0787	14.5078	14.4152	14.5964
MRC2_Q9UBG0	0.101618	1.69813	2	-0.693737	0.13504	0.215893	0.760156	-0.900448	0.178705	0.0730042	-0.800617	-1.19777	-1.30721	-0.323144	MRC2	C-type mannose receptor 2	Q9UBG0	1.02657	0.000301565	0.0140122	-0.472883	sp|Q9UBG0|MRC2_HUMAN C-type mannose receptor 2 OS=Homo sapiens OX=9606 GN=MRC2 PE=1 SV=2	FUNCTION: May play a role as endocytotic lectin receptor displaying calcium-dependent lectin activity. Internalizes glycosylated ligands from the extracellular space for release in an endosomal compartment via clathrin-mediated endocytosis. May be involved in plasminogen activation system controlling the extracellular level of PLAUR/PLAU, and thus may regulate protease activity at the cell surfac…	SUBCELLULAR LOCATION: Membrane; Single-pass type I membrane protein.		collagen catabolic process [GO:0030574]; endocytosis [GO:0006897]; osteoblast differentiation [GO:0001649]	carbohydrate binding [GO:0030246]; collagen binding [GO:0005518]; signaling receptor activity [GO:0038023]	focal adhesion [GO:0005925]; integral component of membrane [GO:0016021]; membrane [GO:0016020]	GO:0001649; GO:0005518; GO:0005925; GO:0006897; GO:0016020; GO:0016021; GO:0030246; GO:0030574; GO:0038023	R-HSA-1236978;	hsa:9902;	18.0706	18.6883	18.8285	17.7629	18.0835	18.1148	18.3254	17.6829	18.1004	18.0595	17.7215	17.5678	17.5255	17.9062
LAMC2_Q13753	-0.090711	1.07325	1.51207	-0.150853	-0.494593	1.80881	1.42563	-0.925308	-0.824212	-0.749565	-0.573354	-1.02777	-0.581063	-0.402334	LAMC2	Laminin subunit gamma-2	Q13753	1.06678	0.000303642	0.0140122	-1.18465	sp|Q13753|LAMC2_HUMAN Laminin subunit gamma-2 OS=Homo sapiens OX=9606 GN=LAMC2 PE=1 SV=2	FUNCTION: Binding to cells via a high affinity receptor, laminin is thought to mediate the attachment, migration and organization of cells into tissues during embryonic development by interacting with other extracellular matrix components. Ladsin exerts cell-scattering activity toward a wide variety of cells, including epithelial, endothelial, and fibroblastic cells. {ECO:0000269|PubMed:8265624}.	SUBCELLULAR LOCATION: Secreted, extracellular space, extracellular matrix, basement membrane. Note=Major component.	DISEASE: Epidermolysis bullosa, junctional, Herlitz type (H-JEB) [MIM:226700]: An infantile and lethal form of junctional epidermolysis bullosa, a group of blistering skin diseases characterized by tissue separation which occurs within the dermo-epidermal basement In the Herlitz type, death occurs usually within the first six months of life. Occasionally, children survive to teens. It is marked b…	animal organ morphogenesis [GO:0009887]; cell adhesion [GO:0007155]; collagen fibril organization [GO:0030199]; dendrite development [GO:0016358]; epidermis development [GO:0008544]; extracellular matrix organization [GO:0030198]; hemidesmosome assembly [GO:0031581]; motor neuron axon guidance [GO:0008045]; positive regulation of cell migration [GO:0030335]; positive regulation of cell population…	heparin binding [GO:0008201]; signaling receptor binding [GO:0005102]	basement membrane [GO:0005604]; cell cortex [GO:0005938]; collagen-containing extracellular matrix [GO:0062023]; extracellular region [GO:0005576]; extracellular space [GO:0005615]; laminin-2 complex [GO:0005607]; membrane [GO:0016020]; perinuclear region of cytoplasm [GO:0048471]	GO:0005102; GO:0005576; GO:0005604; GO:0005607; GO:0005615; GO:0005938; GO:0007155; GO:0008045; GO:0008201; GO:0008284; GO:0008544; GO:0009887; GO:0009888; GO:0016020; GO:0016358; GO:0030198; GO:0030199; GO:0030335; GO:0031581; GO:0048471; GO:0062023	R-HSA-1474228;R-HSA-2022090;R-HSA-2214320;R-HSA-3000157;R-HSA-3000171;R-HSA-446107;R-HSA-8874081;	hsa:3918;	18.2581	19.2075	19.5654	18.2091	17.9287	19.8074	19.4949	17.5774	17.6599	17.7207	17.8645	17.4938	17.8582	18.0039
CPQ_Q9Y646	0.299102	0.344531	1.4111	0.49774	-0.455232	1.54053	1.33142	-1.44564	-0.113052	0.182309	-1.00215	-1.4277	-0.996778	-0.166181	CPQ	Carboxypeptidase Q	Q9Y646	1.0312	0.000305956	0.0140122	-0.427508	sp|Q9Y646|CBPQ_HUMAN Carboxypeptidase Q OS=Homo sapiens OX=9606 GN=CPQ PE=1 SV=1	FUNCTION: Carboxypeptidase that may play an important role in the hydrolysis of circulating peptides. Catalyzes the hydrolysis of dipeptides with unsubstituted terminals into amino acids. May play a role in the liberation of thyroxine hormone from its thyroglobulin (Tg) precursor.	SUBCELLULAR LOCATION: Endoplasmic reticulum {ECO:0000269|PubMed:10206990}. Golgi apparatus {ECO:0000269|PubMed:10206990}. Lysosome {ECO:0000250}. Secreted {ECO:0000269|PubMed:10206990}. Note=Secretion is stimulated by TSH/thyroid-stimulating hormone, INS/insulin and SST/somatostatin. {ECO:0000250}.		peptide catabolic process [GO:0043171]; proteolysis [GO:0006508]; thyroid hormone generation [GO:0006590]; tissue regeneration [GO:0042246]	carboxypeptidase activity [GO:0004180]; metal ion binding [GO:0046872]; metallodipeptidase activity [GO:0070573]; protein homodimerization activity [GO:0042803]	cytoplasm [GO:0005737]; endoplasmic reticulum [GO:0005783]; extracellular exosome [GO:0070062]; extracellular space [GO:0005615]; Golgi apparatus [GO:0005794]; intracellular membrane-bounded organelle [GO:0043231]; lysosome [GO:0005764]	GO:0004180; GO:0005615; GO:0005737; GO:0005764; GO:0005783; GO:0005794; GO:0006508; GO:0006590; GO:0042246; GO:0042803; GO:0043171; GO:0043231; GO:0046872; GO:0070062; GO:0070573		hsa:10404;	14.0056	14.0193	14.3404	14.0654	13.7785	14.3794	14.3164	13.4802	13.8815	13.9704	13.6138	13.4856	13.6154	13.8655
CADPS_Q9ULU8	-0.106197	-1.05681	-1.38816	-0.622037	-1.14673	-0.634806	-0.7467	0.628255	0.131186	0.853978	0.207223	1.24581	2	0.584471	CADPS	Calcium-dependent secretion activator 1	Q9ULU8	1.02887	0.00030723	0.0140122	0.480919	sp|Q9ULU8|CAPS1_HUMAN Calcium-dependent secretion activator 1 OS=Homo sapiens OX=9606 GN=CADPS PE=1 SV=3	FUNCTION: Calcium-binding protein involved in exocytosis of vesicles filled with neurotransmitters and neuropeptides. Probably acts upstream of fusion in the biogenesis or maintenance of mature secretory vesicles. Regulates catecholamine loading of DCVs. May specifically mediate the Ca(2+)-dependent exocytosis of large dense-core vesicles (DCVs) and other dense-core vesicles by acting as a PtdIns…	SUBCELLULAR LOCATION: Cell junction, synapse {ECO:0000250|UniProtKB:Q62717}. Cytoplasmic vesicle, secretory vesicle, neuronal dense core vesicle membrane {ECO:0000250|UniProtKB:Q62717}; Peripheral membrane protein {ECO:0000250|UniProtKB:Q62717}. Note=Membrane-associated to vesicles. Strongly enriched in synaptic fractions. Preferentially binds to dense core vesicles but not to synaptic vesicles. …		dense core granule exocytosis [GO:1990504]; exocytosis [GO:0006887]; positive regulation of exocytosis [GO:0045921]; protein transport [GO:0015031]; synaptic vesicle exocytosis [GO:0016079]	lipid binding [GO:0008289]; metal ion binding [GO:0046872]; protein kinase binding [GO:0019901]	cytosol [GO:0005829]; glutamatergic synapse [GO:0098978]; neuronal dense core vesicle membrane [GO:0099012]; presynapse [GO:0098793]	GO:0005829; GO:0006887; GO:0008289; GO:0015031; GO:0016079; GO:0019901; GO:0045921; GO:0046872; GO:0098793; GO:0098978; GO:0099012; GO:1990504		hsa:8618;	16.8665	16.5859	16.4881	16.7142	16.5593	16.7105	16.6774	17.0834	16.9366	17.15	16.9591	17.2657	17.5033	17.0704
KIAA1217_Q5T5P2	0.679332	1.95753	1.31026	0.580839	0.937684	0.0209856	-0.191995	-0.578286	-0.788352	-0.223995	0.0369633	-1.06284	-1.25975	-1.41838	KIAA1217	Sickle tail protein homolog	Q5T5P2	1.02247	0.000308097	0.0140122	-0.42956	sp|Q5T5P2|SKT_HUMAN Sickle tail protein homolog OS=Homo sapiens OX=9606 GN=KIAA1217 PE=1 SV=2	FUNCTION: Required for normal development of intervertebral disks. {ECO:0000250|UniProtKB:A2AQ25}.	SUBCELLULAR LOCATION: Cytoplasm {ECO:0000250|UniProtKB:A2AQ25}.		embryonic skeletal system development [GO:0048706]	enzyme regulator activity [GO:0030234]	cytoplasm [GO:0005737]	GO:0005737; GO:0030234; GO:0048706		hsa:56243;	19.5266	19.8896	19.7058	19.4986	19.6	19.3397	19.2792	19.1695	19.1098	19.2701	19.3442	19.0319	18.976	18.9309
STXBP1_P61764	-0.153372	1.98985	1.05873	0.479185	0.953462	-0.137355	1.15969	-1.02567	-0.389607	0.0430033	-0.672396	-0.855208	-1.19033	-1.25999	STXBP1	Syntaxin-binding protein 1	P61764	1.022	0.000308948	0.0140122	-0.399039	sp|P61764|STXB1_HUMAN Syntaxin-binding protein 1 OS=Homo sapiens OX=9606 GN=STXBP1 PE=1 SV=1	FUNCTION: Participates in the regulation of synaptic vesicle docking and fusion through interaction with GTP-binding proteins (By similarity). Essential for neurotransmission and binds syntaxin, a component of the synaptic vesicle fusion machinery probably in a 1:1 ratio. Can interact with syntaxins 1, 2, and 3 but not syntaxin 4. May play a role in determining the specificity of intracellular fu…	SUBCELLULAR LOCATION: Cytoplasm, cytosol {ECO:0000269|PubMed:20887364}. Membrane; Peripheral membrane protein.	DISEASE: Developmental and epileptic encephalopathy 4 (DEE4) [MIM:612164]: A severe form of epilepsy characterized by frequent tonic seizures or spasms beginning in infancy with a specific EEG finding of suppression-burst patterns, characterized by high-voltage bursts alternating with almost flat suppression phases. Affected individuals have neonatal or infantile onset of seizures, profound menta…	axon target recognition [GO:0007412]; cellular response to interferon-gamma [GO:0071346]; developmental process involved in reproduction [GO:0003006]; intracellular protein transport [GO:0006886]; long-term synaptic depression [GO:0060292]; negative regulation of neuron apoptotic process [GO:0043524]; negative regulation of protein-containing complex assembly [GO:0031333]; negative regulation of …	identical protein binding [GO:0042802]; phospholipase binding [GO:0043274]; protein domain specific binding [GO:0019904]; protein kinase binding [GO:0019901]; protein N-terminus binding [GO:0047485]; RNA binding [GO:0003723]; SNARE binding [GO:0000149]; syntaxin-1 binding [GO:0017075]; syntaxin binding [GO:0019905]	axon [GO:0030424]; cytoplasm [GO:0005737]; cytoskeleton [GO:0005856]; cytosol [GO:0005829]; extracellular exosome [GO:0070062]; glutamatergic synapse [GO:0098978]; mitochondrion [GO:0005739]; nucleoplasm [GO:0005654]; perinuclear region of cytoplasm [GO:0048471]; phagocytic vesicle [GO:0045335]; plasma membrane [GO:0005886]; platelet alpha granule [GO:0031091]; postsynapse [GO:0098794]; presynapt…	GO:0000149; GO:0002576; GO:0003006; GO:0003723; GO:0005654; GO:0005737; GO:0005739; GO:0005829; GO:0005856; GO:0005886; GO:0006836; GO:0006886; GO:0006904; GO:0007269; GO:0007274; GO:0007412; GO:0010807; GO:0016082; GO:0016188; GO:0016192; GO:0017075; GO:0019901; GO:0019904; GO:0019905; GO:0030141; GO:0030424; GO:0031091; GO:0031333; GO:0031630; GO:0032229; GO:0032355; GO:0032991; GO:0035493; GO:…	R-HSA-181429 [P61764-1];R-HSA-181430 [P61764-1];R-HSA-210500 [P61764-1];R-HSA-212676 [P61764-1];R-HSA-264642 [P61764-1];R-HSA-422356;R-HSA-6794361;R-HSA-888590 [P61764-1];	hsa:6812;	18.2951	18.8546	18.6115	18.4602	18.584	18.2993	18.6379	18.0674	18.2334	18.3463	18.1596	18.1119	18.0244	18.0062
ERLIN2_O94905	0.436096	1.19111	0.458786	0.970959	0.897166	0.896378	0.992146	-0.672943	-0.144986	-2	-0.619503	-0.692399	-1.17569	-0.344628	ERLIN2	Erlin-2	O94905	1.01552	0.000309074	0.0140122	-0.319074	sp|O94905|ERLN2_HUMAN Erlin-2 OS=Homo sapiens OX=9606 GN=ERLIN2 PE=1 SV=1	FUNCTION: Component of the ERLIN1/ERLIN2 complex which mediates the endoplasmic reticulum-associated degradation (ERAD) of inositol 1,4,5-trisphosphate receptors (IP3Rs) such as ITPR1 (PubMed:19240031, PubMed:17502376). Promotes sterol-accelerated ERAD of HMGCR probably implicating an AMFR/gp78-containing ubiquitin ligase complex (PubMed:21343306). Involved in regulation of cellular cholesterol h…	SUBCELLULAR LOCATION: Endoplasmic reticulum membrane {ECO:0000269|PubMed:16835267, ECO:0000269|PubMed:17502376, ECO:0000269|PubMed:19240031}; Single-pass type II membrane protein {ECO:0000269|PubMed:16835267, ECO:0000269|PubMed:17502376, ECO:0000269|PubMed:19240031}. Note=Associated with lipid raft-like domains of the endoplasmic reticulum membrane.	DISEASE: Spastic paraplegia 18, autosomal recessive (SPG18) [MIM:611225]: A form of spastic paraplegia, a neurodegenerative disorder characterized by a slow, gradual, progressive weakness and spasticity of the lower limbs. Rate of progression and the severity of symptoms are quite variable. Initial symptoms may include difficulty with balance, weakness and stiffness in the legs, muscle spasms, an…	cholesterol metabolic process [GO:0008203]; negative regulation of cholesterol biosynthetic process [GO:0045541]; negative regulation of fatty acid biosynthetic process [GO:0045717]; SREBP signaling pathway [GO:0032933]; transmembrane transport [GO:0055085]; ubiquitin-dependent ERAD pathway [GO:0030433]	cholesterol binding [GO:0015485]; ubiquitin protein ligase binding [GO:0031625]	cytosol [GO:0005829]; endoplasmic reticulum [GO:0005783]; endoplasmic reticulum membrane [GO:0005789]; integral component of membrane [GO:0016021]; membrane raft [GO:0045121]; plasma membrane [GO:0005886]; protein-containing complex [GO:0032991]	GO:0005783; GO:0005789; GO:0005829; GO:0005886; GO:0008203; GO:0015485; GO:0016021; GO:0030433; GO:0031625; GO:0032933; GO:0032991; GO:0045121; GO:0045541; GO:0045717; GO:0055085	R-HSA-382556;R-HSA-5655302;R-HSA-5678895;R-HSA-8853336;	hsa:11160;	20.8043	20.9486	20.8086	20.9065	20.8924	20.8923	20.9106	20.5923	20.6932	20.3019	20.6025	20.5886	20.4962	20.6551
CPVL_Q9H3G5	-0.033668	-1.54321	-0.48267	-0.796933	-1.47462	-0.260779	-0.925779	0.412833	0.452996	1.2466	1.9799	0.648167	0.586035	0.191133	CPVL	Probable serine carboxypeptidase CPVL	Q9H3G5	1.02833	0.000310556	0.0140122	0.5508	sp|Q9H3G5|CPVL_HUMAN Probable serine carboxypeptidase CPVL OS=Homo sapiens OX=9606 GN=CPVL PE=1 SV=2	FUNCTION: May be involved in the digestion of phagocytosed particles in the lysosome, participation in an inflammatory protease cascade, and trimming of peptides for antigen presentation.				serine-type carboxypeptidase activity [GO:0004185]	extracellular exosome [GO:0070062]	GO:0004185; GO:0070062		hsa:54504;	19.7039	19.1765	19.547	19.4372	19.2004	19.6245	19.3922	19.8599	19.8739	20.1512	20.4074	19.9421	19.9204	19.7824
NTHL1_P78549	0.455496	1.74117	0.062794	-0.511487	0.456118	1.27765	1.0767	-0.845686	0.153883	-0.814097	-1.73101	-0.148069	-1.41954	0.246075	NTHL1	Endonuclease III-like protein 1	P78549	1.04142	0.000311422	0.0140122	-0.639864	sp|P78549|NTH_HUMAN Endonuclease III-like protein 1 OS=Homo sapiens OX=9606 GN=NTHL1 PE=1 SV=2	FUNCTION: Bifunctional DNA N-glycosylase with associated apurinic/apyrimidinic (AP) lyase function that catalyzes the first step in base excision repair (BER), the primary repair pathway for the repair of oxidative DNA damage (PubMed:9927729). The DNA N-glycosylase activity releases the damaged DNA base from DNA by cleaving the N-glycosidic bond, leaving an AP site. The AP-lyase activity cleaves …	SUBCELLULAR LOCATION: Nucleus {ECO:0000255|HAMAP-Rule:MF_03183, ECO:0000269|PubMed:10882850, ECO:0000269|PubMed:12531031, ECO:0000269|PubMed:9611236}. Mitochondrion {ECO:0000255|HAMAP-Rule:MF_03183, ECO:0000269|PubMed:9611236}.	DISEASE: Familial adenomatous polyposis 3 (FAP3) [MIM:616415]: A form of familial adenomatous polyposis, a condition characterized by the development of multiple colorectal adenomatous polyps, benign neoplasms derived from glandular epithelium. Some affected individuals may develop colorectal carcinoma. {ECO:0000269|PubMed:25938944}. Note=The disease is caused by variants affecting the gene repre…	base-excision repair, AP site formation [GO:0006285]; base-excision repair, gap-filling [GO:0006287]; depyrimidination [GO:0045008]; nucleotide-excision repair, DNA incision, 5'-to lesion [GO:0006296]	4 iron, 4 sulfur cluster binding [GO:0051539]; class I DNA-(apurinic or apyrimidinic site) endonuclease activity [GO:0140078]; damaged DNA binding [GO:0003684]; DNA-(apurinic or apyrimidinic site) endonuclease activity [GO:0003906]; DNA N-glycosylase activity [GO:0019104]; double-stranded DNA binding [GO:0003690]; endonuclease activity [GO:0004519]; metal ion binding [GO:0046872]; oxidized pyrimi…	mitochondrion [GO:0005739]; nucleoplasm [GO:0005654]; nucleus [GO:0005634]	GO:0000703; GO:0003684; GO:0003690; GO:0003906; GO:0004519; GO:0005634; GO:0005654; GO:0005739; GO:0006285; GO:0006287; GO:0006296; GO:0019104; GO:0045008; GO:0046872; GO:0051539; GO:0140078	R-HSA-110328;R-HSA-110329;R-HSA-110357;R-HSA-9630221;R-HSA-9630222;	hsa:4913;	15.9936	16.6252	15.8007	15.5185	15.9939	16.3975	16.2988	15.3543	15.8454	15.3699	14.9194	15.6971	15.0724	15.8907
MYL7_Q01449	0.868982	0.553755	0.903934	1.77326	0.252785	0.165095	-0.231195	-0.602348	-1.19624	-1.07692	1.31201	-1.1895	-0.234714	-1.2989	MYL7	Myosin regulatory light chain 2, atrial isoform	Q01449	1.02201	0.00031325	0.0140139	-0.50188	sp|Q01449|MLRA_HUMAN Myosin regulatory light chain 2, atrial isoform OS=Homo sapiens OX=9606 GN=MYL7 PE=1 SV=1				muscle contraction [GO:0006936]	calcium ion binding [GO:0005509]	A band [GO:0031672]; cytosol [GO:0005829]; myosin complex [GO:0016459]	GO:0005509; GO:0005829; GO:0006936; GO:0016459; GO:0031672	R-HSA-445355;	hsa:58498;	23.4076	23.2784	23.4219	23.7782	23.1551	23.1192	22.9568	22.8047	22.5613	22.6102	23.5892	22.5641	22.9553	22.5192
COBLL1_Q53SF7	-0.329574	1.56052	1.69097	0.826434	1.32221	0.438771	0.0255891	-0.504887	-0.963814	-0.650261	-0.423001	-0.807693	-0.821808	-1.36346	COBLL1	Cordon-bleu protein-like 1	Q53SF7	1.03531	0.00032158	0.0143048	-0.542257	sp|Q53SF7|COBL1_HUMAN Cordon-bleu protein-like 1 OS=Homo sapiens OX=9606 GN=COBLL1 PE=1 SV=2					actin monomer binding [GO:0003785]; cadherin binding [GO:0045296]	extracellular exosome [GO:0070062]	GO:0003785; GO:0045296; GO:0070062		hsa:22837;	15.5132	16.1613	16.2061	15.9096	16.0796	15.7767	15.635	15.4531	15.2958	15.4033	15.4812	15.3493	15.3444	15.1587
SLC4A8_Q2Y0W8	0.0132472	0.957098	1.70608	-0.0920994	0.943467	0.713787	0.828262	-1.15562	-0.274754	0.420681	-0.355954	-1.47295	-1.70956	-0.521673	SLC4A8	Electroneutral sodium bicarbonate exchanger 1;Sodium-driven chloride bicarbonate exchanger	Q2Y0W8	1.04171	0.000326308	0.0144331	-0.564297	sp|Q2Y0W8|S4A8_HUMAN Electroneutral sodium bicarbonate exchanger 1 OS=Homo sapiens OX=9606 GN=SLC4A8 PE=1 SV=1;sp|Q6U841|S4A10_HUMAN Sodium-driven chloride bicarbonate exchanger OS=Homo sapiens OX=9606 GN=SLC4A10 PE=2 SV=1	FUNCTION: Mediates electroneutral sodium- and carbonate-dependent chloride-HCO3(-) exchange with a Na(+):HCO3(-) stoichiometry of 2:1. Plays a major role in pH regulation in neurons. May be involved in cell pH regulation by transporting HCO3(-) from blood to cell. Enhanced expression in severe acid stress could be important for cell survival by mediating the influx of HCO3(-) into the cells. Also…	SUBCELLULAR LOCATION: Membrane {ECO:0000269|PubMed:17715183}; Multi-pass membrane protein {ECO:0000269|PubMed:17715183}.		bicarbonate transport [GO:0015701]; chloride transmembrane transport [GO:1902476]; ion homeostasis [GO:0050801]; modulation of chemical synaptic transmission [GO:0050804]; positive regulation of synaptic vesicle exocytosis [GO:2000302]; regulation of intracellular pH [GO:0051453]; regulation of membrane potential [GO:0042391]; sodium ion transmembrane transport [GO:0035725]; transmembrane transpo…	anion:anion antiporter activity [GO:0015301]; bicarbonate transmembrane transporter activity [GO:0015106]; chloride transmembrane transporter activity [GO:0015108]; inorganic anion exchanger activity [GO:0005452]; sodium:bicarbonate symporter activity [GO:0008510]; sodium ion transmembrane transporter activity [GO:0015081]; transmembrane transporter activity [GO:0022857]	asymmetric synapse [GO:0032279]; axon terminus [GO:0043679]; dendrite [GO:0030425]; glial cell projection [GO:0097386]; glutamatergic synapse [GO:0098978]; hippocampal mossy fiber [GO:0097457]; integral component of membrane [GO:0016021]; membrane [GO:0016020]; neuronal cell body membrane [GO:0032809]; neuron projection [GO:0043005]; plasma membrane [GO:0005886]; presynapse [GO:0098793]; presynap…	GO:0005452; GO:0005886; GO:0008021; GO:0008510; GO:0015081; GO:0015106; GO:0015108; GO:0015301; GO:0015701; GO:0016020; GO:0016021; GO:0022857; GO:0030425; GO:0032279; GO:0032280; GO:0032809; GO:0035725; GO:0042391; GO:0042734; GO:0043005; GO:0043195; GO:0043679; GO:0050801; GO:0050804; GO:0051453; GO:0055085; GO:0097386; GO:0097457; GO:0098793; GO:0098978; GO:0150104; GO:1902476; GO:2000302	R-HSA-425381;	hsa:9498;	13.8179	14.1856	14.4774	13.7769	14.1803	14.0908	14.1354	13.3626	13.7057	13.9766	13.6741	13.2389	13.1468	13.6095
GNB4_Q9HAV0	0.126359	1.36227	0.717706	1.7226	1.34696	0.16296	-0.249632	-0.674209	-0.309873	-0.949408	0.232167	-1.16528	-1.4626	-0.860029	GNB4	Guanine nucleotide-binding protein subunit beta-4	Q9HAV0	1.02122	0.000340095	0.0149585	-0.377408	sp|Q9HAV0|GBB4_HUMAN Guanine nucleotide-binding protein subunit beta-4 OS=Homo sapiens OX=9606 GN=GNB4 PE=1 SV=3	FUNCTION: Guanine nucleotide-binding proteins (G proteins) are involved as a modulator or transducer in various transmembrane signaling systems. The beta and gamma chains are required for the GTPase activity, for replacement of GDP by GTP, and for G protein-effector interaction.		DISEASE: Charcot-Marie-Tooth disease, dominant, intermediate type, F (CMTDIF) [MIM:615185]: A form of Charcot-Marie-Tooth disease, a disorder of the peripheral nervous system, characterized by progressive weakness and atrophy, initially of the peroneal muscles and later of the distal muscles of the arms. CMTDIF is characterized by onset around adolescence of slowly progressive distal muscle atrop…	G protein-coupled receptor signaling pathway [GO:0007186]; protein folding [GO:0006457]; substantia nigra development [GO:0021762]	G-protein gamma-subunit binding [GO:0031682]; protein-containing complex binding [GO:0044877]	cytoplasm [GO:0005737]; cytosol [GO:0005829]; extracellular exosome [GO:0070062]; heterotrimeric G-protein complex [GO:0005834]; lysosomal membrane [GO:0005765]	GO:0005737; GO:0005765; GO:0005829; GO:0005834; GO:0006457; GO:0007186; GO:0021762; GO:0031682; GO:0044877; GO:0070062	R-HSA-1296041;R-HSA-163359;R-HSA-202040;R-HSA-381676;R-HSA-392170;R-HSA-392451;R-HSA-392851;R-HSA-400042;R-HSA-4086398;R-HSA-416476;R-HSA-416482;R-HSA-418217;R-HSA-418555;R-HSA-418592;R-HSA-418594;R-HSA-418597;R-HSA-420092;R-HSA-428930;R-HSA-432040;R-HSA-456926;R-HSA-500657;R-HSA-6814122;R-HSA-8964315;R-HSA-8964616;R-HSA-9009391;R-HSA-9660821;R-HSA-997272;	hsa:59345;	18.0096	18.3242	18.1602	18.416	18.3203	18.019	17.9139	17.8059	17.8986	17.7358	18.0366	17.6808	17.6052	17.7586
TOM1L2_Q6ZVM7	0.0927357	-1.1249	-1.17736	-0.655719	-1.15129	-0.957596	-0.802879	0.899464	0.636423	2	0.187182	1.00227	0.708523	0.29923	TOM1L2	TOM1-like protein 2	Q6ZVM7	1.03054	0.000345759	0.0150942	0.529356	sp|Q6ZVM7|TM1L2_HUMAN TOM1-like protein 2 OS=Homo sapiens OX=9606 GN=TOM1L2 PE=1 SV=1	FUNCTION: Probable role in protein transport. May regulate growth factor-induced mitogenic signaling. {ECO:0000269|PubMed:16412388, ECO:0000269|PubMed:16479011}.			intracellular protein transport [GO:0006886]; negative regulation of mitotic nuclear division [GO:0045839]; signal transduction [GO:0007165]	clathrin binding [GO:0030276]; protein kinase binding [GO:0019901]	endosome [GO:0005768]; extracellular exosome [GO:0070062]; membrane [GO:0016020]	GO:0005768; GO:0006886; GO:0007165; GO:0016020; GO:0019901; GO:0030276; GO:0045839; GO:0070062		hsa:146691;	17.6283	17.2378	17.2209	17.3882	17.2293	17.2914	17.341	17.887	17.8026	18.254	17.6586	17.92	17.8258	17.6945
ADPRHL1_Q8NDY3	0.398879	-1.85411	-1.19781	-0.108127	-0.131458	-1.15459	-0.752417	1.05486	-0.69302	0.938492	1.05076	0.93931	1.22428	0.28495	ADPRHL1	[Protein ADP-ribosylarginine] hydrolase-like protein 1	Q8NDY3	1.02049	0.000347037	0.0150942	0.41519	sp|Q8NDY3|ARHL1_HUMAN [Protein ADP-ribosylarginine] hydrolase-like protein 1 OS=Homo sapiens OX=9606 GN=ADPRHL1 PE=2 SV=1				protein de-ADP-ribosylation [GO:0051725]	ADP-ribosylarginine hydrolase activity [GO:0003875]; magnesium ion binding [GO:0000287]		GO:0000287; GO:0003875; GO:0051725		hsa:113622;	20.5898	19.9077	20.1064	20.4363	20.4292	20.1195	20.2412	20.7884	20.2592	20.7532	20.7872	20.7534	20.8397	20.5553
RABGAP1L_Q5R372	-0.0642479	-1.12804	-1.60172	-0.64223	-0.694568	-0.729589	-0.980378	0.853845	0.72703	1.65631	0.185898	1.11538	1.2177	0.084608	RABGAP1L	Rab GTPase-activating protein 1-like	Q5R372	1.02939	0.000353269	0.0152803	0.491886	sp|Q5R372|RBG1L_HUMAN Rab GTPase-activating protein 1-like OS=Homo sapiens OX=9606 GN=RABGAP1L PE=1 SV=1	FUNCTION: GTP-hydrolysis activating protein (GAP) for small GTPase RAB22A, converting active RAB22A-GTP to the inactive form RAB22A-GDP (PubMed:16923123). Plays a role in endocytosis and intracellular protein transport. Recruited by ANK2 to phosphatidylinositol 3-phosphate (PI3P)-positive early endosomes, where it inactivates RAB22A, and promotes polarized trafficking to the leading edge of the m…	SUBCELLULAR LOCATION: Cytoplasmic vesicle {ECO:0000250|UniProtKB:A6H6A9}. Early endosome {ECO:0000269|PubMed:16923123}. Golgi apparatus {ECO:0000269|PubMed:16923123}. Note=Colocalizes on endosomes partially with EEA1 (PubMed:16923123). Colocalizes and cotransports on motile vesicles with ANK2 (By similarity). {ECO:0000250|UniProtKB:A6H6A9, ECO:0000269|PubMed:16923123}.	DISEASE: Leukemia, acute myelogenous (AML) [MIM:601626]: A subtype of acute leukemia, a cancer of the white blood cells. AML is a malignant disease of bone marrow characterized by maturational arrest of hematopoietic precursors at an early stage of development. Clonal expansion of myeloid blasts occurs in bone marrow, blood, and other tissue. Myelogenous leukemias develop from changes in cells th…	activation of GTPase activity [GO:0090630]; endocytosis [GO:0006897]; intracellular protein transport [GO:0006886]; regulation of protein localization [GO:0032880]	GTPase activator activity [GO:0005096]; small GTPase binding [GO:0031267]	early endosome [GO:0005769]; Golgi apparatus [GO:0005794]; nucleus [GO:0005634]	GO:0005096; GO:0005634; GO:0005769; GO:0005794; GO:0006886; GO:0006897; GO:0031267; GO:0032880; GO:0090630			16.9637	16.6502	16.5106	16.7934	16.778	16.7676	16.6937	17.2344	17.197	17.4709	17.0375	17.3114	17.3416	17.0076
KCTD5_Q9NXV2	-0.195565	-0.505647	0.0597395	-1.39099	-0.585728	-1.52231	-1.30824	1.52159	1.60546	0.32593	0.425626	1.01432	0.40488	0.150917	KCTD5	BTB/POZ domain-containing protein KCTD5	Q9NXV2	1.02441	0.000356064	0.0153166	0.347029	sp|Q9NXV2|KCTD5_HUMAN BTB/POZ domain-containing protein KCTD5 OS=Homo sapiens OX=9606 GN=KCTD5 PE=1 SV=1	FUNCTION: Its interaction with CUL3 suggests that it may act as a substrate adapter in some E3 ligase complex (PubMed:18573101). Does not affect the function of Kv channel Kv2.1/KCNB1, Kv1.2/KCNA2, Kv4.2/KCND2 and Kv3.4/KCNC4 (PubMed:19361449). {ECO:0000269|PubMed:18573101, ECO:0000269|PubMed:19361449}.	SUBCELLULAR LOCATION: Cytoplasm, cytosol {ECO:0000269|PubMed:17239418}. Cytoplasm {ECO:0000269|PubMed:18573101}. Nucleus. Note=Predominantly cytoplasmic, translocated to the nucleus upon interaction with Rep proteins. {ECO:0000269|PubMed:18573101}.		proteasome-mediated ubiquitin-dependent protein catabolic process [GO:0043161]; protein homooligomerization [GO:0051260]; viral process [GO:0016032]	cullin family protein binding [GO:0097602]; identical protein binding [GO:0042802]; protein-containing complex binding [GO:0044877]	Cul3-RING ubiquitin ligase complex [GO:0031463]; cytoplasm [GO:0005737]; cytosol [GO:0005829]; nucleus [GO:0005634]	GO:0005634; GO:0005737; GO:0005829; GO:0016032; GO:0031463; GO:0042802; GO:0043161; GO:0044877; GO:0051260; GO:0097602		hsa:54442;	14.3449	14.2758	14.4018	14.0784	14.2579	14.0491	14.0969	14.7277	14.7464	14.4611	14.4834	14.6146	14.4787	14.4221
HK2_P52789	0.526541	1.28494	0.959763	0.917293	0.868886	0.502683	0.601871	-1.17988	-0.141944	-0.383317	0.36232	-1.50579	-1.51583	-1.29754	HK2	Hexokinase-2	P52789	1.01596	0.000359433	0.015377	-0.330212	sp|P52789|HXK2_HUMAN Hexokinase-2 OS=Homo sapiens OX=9606 GN=HK2 PE=1 SV=2	FUNCTION: Catalyzes the phosphorylation of hexose, such as D-glucose and D-fructose, to hexose 6-phosphate (D-glucose 6-phosphate and D-fructose 6-phosphate, respectively) (PubMed:23185017, PubMed:26985301, PubMed:29298880). Mediates the initial step of glycolysis by catalyzing phosphorylation of D-glucose to D-glucose 6-phosphate (PubMed:29298880). Plays a key role in maintaining the integrity o…	SUBCELLULAR LOCATION: Mitochondrion outer membrane {ECO:0000269|PubMed:18350175}; Peripheral membrane protein {ECO:0000305}. Cytoplasm, cytosol {ECO:0000269|PubMed:18350175}. Note=The mitochondrial-binding peptide (MBP) region promotes association with the mitochondrial outer membrane (PubMed:29298880). The interaction with the mitochondrial outer membrane via the mitochondrial-binding peptide (M…		apoptotic mitochondrial changes [GO:0008637]; canonical glycolysis [GO:0061621]; cellular glucose homeostasis [GO:0001678]; cellular response to leukemia inhibitory factor [GO:1990830]; establishment of protein localization to mitochondrion [GO:0072655]; fructose 6-phosphate metabolic process [GO:0006002]; glucose 6-phosphate metabolic process [GO:0051156]; glycolytic process [GO:0006096]; lactat…	ATP binding [GO:0005524]; fructokinase activity [GO:0008865]; glucokinase activity [GO:0004340]; glucose binding [GO:0005536]; hexokinase activity [GO:0004396]; mannokinase activity [GO:0019158]	centrosome [GO:0005813]; cytosol [GO:0005829]; intracellular membrane-bounded organelle [GO:0043231]; membrane [GO:0016020]; mitochondrial outer membrane [GO:0005741]; mitochondrion [GO:0005739]; plasma membrane [GO:0005886]; sarcoplasmic reticulum [GO:0016529]	GO:0001666; GO:0001678; GO:0002931; GO:0004340; GO:0004396; GO:0005524; GO:0005536; GO:0005739; GO:0005741; GO:0005813; GO:0005829; GO:0005886; GO:0006002; GO:0006096; GO:0007595; GO:0008637; GO:0008865; GO:0016020; GO:0016529; GO:0019158; GO:0035795; GO:0043231; GO:0045766; GO:0046324; GO:0051156; GO:0061621; GO:0072655; GO:0072656; GO:1904925; GO:1990830; GO:2000378	R-HSA-70171;	hsa:3099;	20.9608	21.1156	21.0493	21.0406	21.0307	20.956	20.9762	20.6125	20.8244	20.7751	20.9273	20.546	20.5439	20.5885
PABPC4_Q13310	-0.0372666	-1.19008	-0.916246	-1.38162	-0.919978	-0.61503	-0.217587	1.18457	0.357372	1.27586	-0.790549	1.21888	1.354	0.677677	PABPC4	Polyadenylate-binding protein 4	Q13310	1.01748	0.000367063	0.0156129	0.363855	sp|Q13310|PABP4_HUMAN Polyadenylate-binding protein 4 OS=Homo sapiens OX=9606 GN=PABPC4 PE=1 SV=1	FUNCTION: Binds the poly(A) tail of mRNA. May be involved in cytoplasmic regulatory processes of mRNA metabolism. Can probably bind to cytoplasmic RNA sequences other than poly(A) in vivo (By similarity). {ECO:0000250}.	SUBCELLULAR LOCATION: Cytoplasm {ECO:0000269|PubMed:17289661}. Note=Localized in cytoplasmic mRNP granules containing untranslated mRNAs.		blood coagulation [GO:0007596]; myeloid cell development [GO:0061515]; regulation of mRNA stability [GO:0043488]; RNA catabolic process [GO:0006401]; RNA processing [GO:0006396]; translation [GO:0006412]	mRNA 3'-UTR binding [GO:0003730]; poly(A) binding [GO:0008143]; poly(U) RNA binding [GO:0008266]; RNA binding [GO:0003723]	cytoplasm [GO:0005737]; cytoplasmic stress granule [GO:0010494]; cytosol [GO:0005829]; nucleus [GO:0005634]; ribonucleoprotein complex [GO:1990904]	GO:0003723; GO:0003730; GO:0005634; GO:0005737; GO:0005829; GO:0006396; GO:0006401; GO:0006412; GO:0007596; GO:0008143; GO:0008266; GO:0010494; GO:0043488; GO:0061515; GO:1990904		hsa:8761;	20.9828	20.7046	20.7707	20.6584	20.7698	20.8433	20.9392	21.2776	21.078	21.2996	20.801	21.2858	21.3185	21.1553
ICAM5_Q9UMF0	-0.229984	1.70959	1.44989	0.292547	1.53467	-0.127042	0.865306	-0.882546	-1.06126	-0.535939	-0.399649	-0.770382	-0.737426	-1.10777	ICAM5	Intercellular adhesion molecule 5	Q9UMF0	1.05271	0.000368935	0.0156129	-0.818814	sp|Q9UMF0|ICAM5_HUMAN Intercellular adhesion molecule 5 OS=Homo sapiens OX=9606 GN=ICAM5 PE=1 SV=3	FUNCTION: ICAM proteins are ligands for the leukocyte adhesion protein LFA-1 (integrin alpha-L/beta-2).	SUBCELLULAR LOCATION: Membrane; Single-pass type I membrane protein.		cell adhesion [GO:0007155]; cell-cell adhesion [GO:0098609]; extracellular matrix organization [GO:0030198]; phagocytosis [GO:0006909]; regulation of immune response [GO:0050776]	integrin binding [GO:0005178]	integral component of plasma membrane [GO:0005887]; plasma membrane [GO:0005886]	GO:0005178; GO:0005886; GO:0005887; GO:0006909; GO:0007155; GO:0030198; GO:0050776; GO:0098609	R-HSA-198933;R-HSA-216083;	hsa:7087;	15.8247	16.8362	16.7008	16.0972	16.745	15.8784	16.3959	15.4843	15.3911	15.6651	15.7362	15.5428	15.56	15.3669
EPB41L2_O43491	0.452532	1.71173	0.394722	0.210169	0.727091	0.85294	0.92922	-1.41958	0.0320062	0.448264	-0.899356	-1.28587	-1.5997	-0.554166	EPB41L2	Band 4.1-like protein 2	O43491	1.03182	0.000371935	0.0156553	-0.561356	sp|O43491|E41L2_HUMAN Band 4.1-like protein 2 OS=Homo sapiens OX=9606 GN=EPB41L2 PE=1 SV=1	FUNCTION: Required for dynein-dynactin complex and NUMA1 recruitment at the mitotic cell cortex during anaphase (PubMed:23870127). {ECO:0000269|PubMed:23870127}.	SUBCELLULAR LOCATION: Cytoplasm, cytoskeleton {ECO:0000250}. Cytoplasm, cell cortex {ECO:0000269|PubMed:23870127}. Cell membrane {ECO:0000269|PubMed:22361696}.		actomyosin structure organization [GO:0031032]; cell cycle [GO:0007049]; cell division [GO:0051301]; cortical actin cytoskeleton organization [GO:0030866]; positive regulation of protein localization to cell cortex [GO:1904778]	actin binding [GO:0003779]; PH domain binding [GO:0042731]; spectrin binding [GO:0030507]; structural molecule activity [GO:0005198]	cell cortex region [GO:0099738]; cell junction [GO:0030054]; cytoskeleton [GO:0005856]; cytosol [GO:0005829]; extracellular exosome [GO:0070062]; focal adhesion [GO:0005925]; nucleoplasm [GO:0005654]; plasma membrane [GO:0005886]; spectrin [GO:0008091]	GO:0003779; GO:0005198; GO:0005654; GO:0005829; GO:0005856; GO:0005886; GO:0005925; GO:0007049; GO:0008091; GO:0030054; GO:0030507; GO:0030866; GO:0031032; GO:0042731; GO:0051301; GO:0070062; GO:0099738; GO:1904778	R-HSA-6794361;	hsa:2037;	18.0909	18.5596	18.0694	18.0007	18.1931	18.2399	18.2683	17.394	17.9344	18.0893	17.5877	17.4438	17.327	17.7162
SH3RF2_Q8TEC5	0.110726	1.64339	0.976336	1.50386	0.875152	0.16897	-0.374764	-1.20233	-0.59765	-0.43374	0.55222	-1.38549	-0.575458	-1.26123	SH3RF2	Putative E3 ubiquitin-protein ligase SH3RF2	Q8TEC5	1.02644	0.000374433	0.0156717	-0.388252	sp|Q8TEC5|SH3R2_HUMAN E3 ubiquitin-protein ligase SH3RF2 OS=Homo sapiens OX=9606 GN=SH3RF2 PE=1 SV=3	FUNCTION: Has E3 ubiquitin-protein ligase activity (PubMed:24130170). Acts as an anti-apoptotic regulator of the JNK pathway by ubiquitinating and promoting the degradation of SH3RF1, a scaffold protein that is required for pro-apoptotic JNK activation (PubMed:22128169). Facilitates TNF-alpha-mediated recruitment of adapter proteins TRADD and RIPK1 to TNFRSF1A and regulates PAK4 protein stability…	SUBCELLULAR LOCATION: Nucleus {ECO:0000269|PubMed:24130170}.		negative regulation of apoptotic process [GO:0043066]; negative regulation of JNK cascade [GO:0046329]; negative regulation of phosphatase activity [GO:0010923]; negative regulation of protein ubiquitination [GO:0031397]; positive regulation of cell migration [GO:0030335]; positive regulation of JNK cascade [GO:0046330]; positive regulation of proteasomal ubiquitin-dependent protein catabolic pro…	metal ion binding [GO:0046872]; phosphatase binding [GO:0019902]; protein phosphatase 1 binding [GO:0008157]; protein phosphatase inhibitor activity [GO:0004864]; ubiquitin protein ligase activity [GO:0061630]	nucleoplasm [GO:0005654]; nucleus [GO:0005634]	GO:0004864; GO:0005634; GO:0005654; GO:0008157; GO:0010923; GO:0019902; GO:0030335; GO:0031397; GO:0032436; GO:0043066; GO:0046329; GO:0046330; GO:0046872; GO:0051865; GO:0061630		hsa:153769;	14.9075	15.3322	15.1474	15.2936	15.1193	14.9237	14.773	14.5436	14.7112	14.7566	15.0299	14.4929	14.7174	14.5273
EFNB3_Q15768	0.884285	1.83119	0.173052	0.885473	1.5099	-0.264341	0.122966	-0.775037	-0.700921	-0.0977628	-0.133389	-0.807802	-1.7944	-0.833211	EFNB3	Ephrin-B3	Q15768	1.03211	0.00037633	0.0156717	-0.580588	sp|Q15768|EFNB3_HUMAN Ephrin-B3 OS=Homo sapiens OX=9606 GN=EFNB3 PE=1 SV=1	FUNCTION: Cell surface transmembrane ligand for Eph receptors, a family of receptor tyrosine kinases which are crucial for migration, repulsion and adhesion during neuronal, vascular and epithelial development. Binds promiscuously Eph receptors residing on adjacent cells, leading to contact-dependent bidirectional signaling into neighboring cells. The signaling pathway downstream of the receptor …	SUBCELLULAR LOCATION: Membrane; Single-pass type I membrane protein.		adult walking behavior [GO:0007628]; axon choice point recognition [GO:0016198]; axon guidance [GO:0007411]; cell-cell signaling [GO:0007267]; ephrin receptor signaling pathway [GO:0048013]; negative regulation of axonogenesis [GO:0050771]; nervous system development [GO:0007399]; T cell costimulation [GO:0031295]; trans-synaptic signaling by trans-synaptic complex, modulating synaptic transmissi…	ephrin receptor binding [GO:0046875]; transmembrane-ephrin receptor activity [GO:0005005]; virus receptor activity [GO:0001618]	glutamatergic synapse [GO:0098978]; hippocampal mossy fiber to CA3 synapse [GO:0098686]; integral component of plasma membrane [GO:0005887]; integral component of postsynaptic density membrane [GO:0099061]; integral component of presynaptic membrane [GO:0099056]; plasma membrane [GO:0005886]	GO:0001618; GO:0005005; GO:0005886; GO:0005887; GO:0007267; GO:0007399; GO:0007411; GO:0007628; GO:0016198; GO:0031295; GO:0046875; GO:0048013; GO:0050771; GO:0098686; GO:0098978; GO:0099056; GO:0099061; GO:0099557	R-HSA-2682334;R-HSA-3928662;R-HSA-3928664;R-HSA-3928665;	hsa:1949;	18.72	19.0942	18.439	18.7205	18.9673	18.2662	18.4192	18.0644	18.0936	18.332	18.3179	18.0514	17.6616	18.0414
ADAM19_Q9H013	0.326451	-1.04958	-0.151113	-1.04348	-1.36675	-0.675669	-1.17314	0.689479	1.31216	2	0.232174	0.620803	-0.138354	0.371041	ADAM19	Disintegrin and metalloproteinase domain-containing protein 19	Q9H013	1.03643	0.000389571	0.0161373	0.55443	sp|Q9H013|ADA19_HUMAN Disintegrin and metalloproteinase domain-containing protein 19 OS=Homo sapiens OX=9606 GN=ADAM19 PE=1 SV=3	FUNCTION: Participates in the proteolytic processing of beta-type neuregulin isoforms which are involved in neurogenesis and synaptogenesis, suggesting a regulatory role in glial cell. Also cleaves alpha-2 macroglobulin. May be involved in osteoblast differentiation and/or osteoblast activity in bone (By similarity). {ECO:0000250}.	SUBCELLULAR LOCATION: Membrane; Single-pass type I membrane protein.		amyloid precursor protein catabolic process [GO:0042987]; extracellular matrix organization [GO:0030198]; membrane protein ectodomain proteolysis [GO:0006509]; placenta development [GO:0001890]; positive regulation of cell-cell adhesion mediated by cadherin [GO:2000049]; positive regulation of gene expression [GO:0010628]; protein processing [GO:0016485]	metal ion binding [GO:0046872]; metalloendopeptidase activity [GO:0004222]; metalloendopeptidase activity involved in amyloid precursor protein catabolic process [GO:1902945]; SH3 domain binding [GO:0017124]	collagen-containing extracellular matrix [GO:0062023]; Golgi apparatus [GO:0005794]; integral component of membrane [GO:0016021]; nucleus [GO:0005634]; plasma membrane [GO:0005886]	GO:0001890; GO:0004222; GO:0005634; GO:0005794; GO:0005886; GO:0006509; GO:0010628; GO:0016021; GO:0016485; GO:0017124; GO:0030198; GO:0042987; GO:0046872; GO:0062023; GO:1902945; GO:2000049	R-HSA-8941237;	hsa:8728;	15.6216	15.1014	15.441	15.1037	14.9815	15.2427	15.0547	15.7588	15.9942	16.2716	15.5859	15.7328	15.4459	15.6384
SIPA1L1_O43166	-0.253584	-0.436069	-0.764694	-1.29213	-0.599673	-0.856114	-1.5247	1.11267	1.03294	1.04382	-0.386862	1.26793	0.303769	1.3527	SIPA1L1	Signal-induced proliferation-associated 1-like protein 1	O43166	1.01904	0.000398135	0.0164053	0.339891	sp|O43166|SI1L1_HUMAN Signal-induced proliferation-associated 1-like protein 1 OS=Homo sapiens OX=9606 GN=SIPA1L1 PE=1 SV=4	FUNCTION: Stimulates the GTPase activity of RAP2A. Promotes reorganization of the actin cytoskeleton and recruits DLG4 to F-actin. Contributes to the regulation of dendritic spine morphogenesis (By similarity). {ECO:0000250}.	SUBCELLULAR LOCATION: Cytoplasm, cytoskeleton {ECO:0000250}. Cell junction, synapse, postsynaptic density {ECO:0000250}. Cell junction, synapse, synaptosome {ECO:0000250}. Note=Associated with the actin cytoskeleton. Detected at synapses and dendritic spines of cultured hippocampal neurons (By similarity). {ECO:0000250}.		actin cytoskeleton reorganization [GO:0031532]; activation of GTPase activity [GO:0090630]; ephrin receptor signaling pathway [GO:0048013]; regulation of axonogenesis [GO:0050770]; regulation of dendrite morphogenesis [GO:0048814]; regulation of dendritic spine morphogenesis [GO:0061001]; regulation of GTPase activity [GO:0043087]; regulation of small GTPase mediated signal transduction [GO:00510…	ephrin receptor binding [GO:0046875]; GTPase activator activity [GO:0005096]	actin cytoskeleton [GO:0015629]; cytoplasm [GO:0005737]; dendritic spine [GO:0043197]; plasma membrane [GO:0005886]; postsynaptic density [GO:0014069]	GO:0005096; GO:0005737; GO:0005886; GO:0014069; GO:0015629; GO:0031532; GO:0043087; GO:0043197; GO:0046875; GO:0048013; GO:0048167; GO:0048814; GO:0050770; GO:0051056; GO:0061001; GO:0090630	R-HSA-6794361;	hsa:26037;	17.9728	17.9349	17.8666	17.7571	17.9009	17.8476	17.7088	18.2566	18.24	18.2423	17.9451	18.2889	18.0886	18.3065
ZNF589_Q86UQ0	0.50863	1.88008	-0.476362	0.891833	1.34044	0.74304	0.748354	-0.957746	-0.654029	-0.533515	-0.514482	-0.86249	-0.607899	-1.50585	ZNF589	Zinc finger protein 589	Q86UQ0	1.03479	0.00040642	0.016659	-0.483373	sp|Q86UQ0|ZN589_HUMAN Zinc finger protein 589 OS=Homo sapiens OX=9606 GN=ZNF589 PE=1 SV=1	FUNCTION: May play a role in hematopoietic stem/progenitor cell differentiation. May play a role as a DNA binding-dependent transcriptional repressor. {ECO:0000269|PubMed:10029171, ECO:0000269|PubMed:12097288}.	SUBCELLULAR LOCATION: Nucleus {ECO:0000269|PubMed:23665872}.		negative regulation of transcription by RNA polymerase II [GO:0000122]; regulation of transcription by RNA polymerase II [GO:0006357]	DNA-binding transcription factor activity, RNA polymerase II-specific [GO:0000981]; DNA-binding transcription repressor activity, RNA polymerase II-specific [GO:0001227]; metal ion binding [GO:0046872]; RNA polymerase II transcription regulatory region sequence-specific DNA binding [GO:0000977]	nucleoplasm [GO:0005654]; nucleus [GO:0005634]	GO:0000122; GO:0000977; GO:0000981; GO:0001227; GO:0005634; GO:0005654; GO:0006357; GO:0046872	R-HSA-212436;	hsa:51385;	14.2892	14.7008	13.9935	14.4042	14.5388	14.3595	14.3611	13.849	13.9401	13.9763	13.982	13.8776	13.954	13.6844
ITGA9_Q13797	-0.373479	-1.00786	-1.40841	-0.253837	-0.439281	-0.904163	-1.40617	0.135656	0.98458	1.70802	1.34613	0.27314	0.43653	0.90915	ITGA9	Integrin alpha-9	Q13797	1.03538	0.000414391	0.0167295	0.583827	sp|Q13797|ITA9_HUMAN Integrin alpha-9 OS=Homo sapiens OX=9606 GN=ITGA9 PE=1 SV=2	FUNCTION: Integrin alpha-9/beta-1 (ITGA9:ITGB1) is a receptor for VCAM1, cytotactin and osteopontin. It recognizes the sequence A-E-I-D-G-I-E-L in cytotactin. {ECO:0000250}.	SUBCELLULAR LOCATION: Membrane {ECO:0000255}; Single-pass type I membrane protein {ECO:0000255}.		cell adhesion [GO:0007155]; extracellular matrix organization [GO:0030198]; integrin-mediated signaling pathway [GO:0007229]; wound healing [GO:0042060]	collagen binding [GO:0005518]; laminin binding [GO:0043236]; metal ion binding [GO:0046872]	integrin alpha9-beta1 complex [GO:0034679]; integrin complex [GO:0008305]; plasma membrane [GO:0005886]	GO:0005518; GO:0005886; GO:0007155; GO:0007229; GO:0008305; GO:0030198; GO:0034679; GO:0042060; GO:0043236; GO:0046872	R-HSA-216083;R-HSA-3000178;R-HSA-445144;	hsa:3680;	16.663	16.4393	16.298	16.7052	16.6398	16.4758	16.2988	16.8426	17.142	17.3972	17.2696	16.8911	16.9487	17.1154
ACAA1_P09110	-0.299564	-1.06444	-0.926897	-0.825127	-1.43712	-0.438595	-0.900941	0.127771	0.419718	0.264766	1.82734	0.933761	1.11178	1.20755	ACAA1	3-ketoacyl-CoA thiolase, peroxisomal	P09110	1.01937	0.000414769	0.0167295	0.381365	sp|P09110|THIK_HUMAN 3-ketoacyl-CoA thiolase, peroxisomal OS=Homo sapiens OX=9606 GN=ACAA1 PE=1 SV=2	FUNCTION: Responsible for the thiolytic cleavage of straight chain 3-oxoacyl-CoAs. Catalyzes the cleavage of short, medium and long straight chain 3-oxoacyl-CoAs, medium chain 3-oxoacyl-CoAs being the best substrates. {ECO:0000250|UniProtKB:P21775}.	SUBCELLULAR LOCATION: Peroxisome {ECO:0000250|UniProtKB:P21775}.		alpha-linolenic acid metabolic process [GO:0036109]; bile acid metabolic process [GO:0008206]; fatty acid beta-oxidation [GO:0006635]; fatty acid beta-oxidation using acyl-CoA oxidase [GO:0033540]; neutrophil degranulation [GO:0043312]; phenylacetate catabolic process [GO:0010124]; protein localization [GO:0008104]; very long-chain fatty acid metabolic process [GO:0000038]	acetate CoA-transferase activity [GO:0008775]; acetyl-CoA C-acetyltransferase activity [GO:0003985]; acetyl-CoA C-acyltransferase activity [GO:0003988]; acetyl-CoA C-myristoyltransferase activity [GO:0050633]; palmitoyl-CoA oxidase activity [GO:0016401]	cytosol [GO:0005829]; extracellular region [GO:0005576]; membrane [GO:0016020]; peroxisomal matrix [GO:0005782]; peroxisome [GO:0005777]; specific granule lumen [GO:0035580]	GO:0000038; GO:0003985; GO:0003988; GO:0005576; GO:0005777; GO:0005782; GO:0005829; GO:0006635; GO:0008104; GO:0008206; GO:0008775; GO:0010124; GO:0016020; GO:0016401; GO:0033540; GO:0035580; GO:0036109; GO:0043312; GO:0050633	R-HSA-2046106;R-HSA-390247;R-HSA-6798695;R-HSA-9033241;R-HSA-9033500;	hsa:30;	19.808	19.6347	19.6659	19.6889	19.5503	19.7765	19.6718	19.9048	19.9709	19.9358	20.2898	20.0873	20.1277	20.1494
TNPO1_Q92973	-0.00380111	-2	-0.920099	-0.539632	-1.16574	-0.321871	-0.676042	0.48467	0.546942	0.828752	1.63441	0.232042	0.961352	0.971099	TNPO1	Transportin-1	Q92973	1.01762	0.000415728	0.0167295	0.349664	sp|Q92973|TNPO1_HUMAN Transportin-1 OS=Homo sapiens OX=9606 GN=TNPO1 PE=1 SV=2	FUNCTION: Functions in nuclear protein import as nuclear transport receptor. Serves as receptor for nuclear localization signals (NLS) in cargo substrates (PubMed:24753571). Is thought to mediate docking of the importin/substrate complex to the nuclear pore complex (NPC) through binding to nucleoporin and the complex is subsequently translocated through the pore by an energy requiring, Ran-depend…	SUBCELLULAR LOCATION: Cytoplasm. Nucleus.		intraciliary transport involved in cilium assembly [GO:0035735]; protein import into nucleus [GO:0006606]; regulation of mRNA stability [GO:0043488]; viral process [GO:0016032]	nuclear import signal receptor activity [GO:0061608]; nuclear localization sequence binding [GO:0008139]; RNA binding [GO:0003723]; small GTPase binding [GO:0031267]	cilium [GO:0005929]; cytoplasm [GO:0005737]; cytosol [GO:0005829]; extracellular exosome [GO:0070062]; nucleus [GO:0005634]	GO:0003723; GO:0005634; GO:0005737; GO:0005829; GO:0005929; GO:0006606; GO:0008139; GO:0016032; GO:0031267; GO:0035735; GO:0043488; GO:0061608; GO:0070062	R-HSA-450513;R-HSA-5620924;R-HSA-9615933;	hsa:3842;	20.0174	19.5788	19.8193	19.9015	19.7661	19.9486	19.872	20.123	20.1365	20.1974	20.3717	20.0684	20.2261	20.2282
BSG_P35613	0.209137	1.80006	0.813001	0.764319	1.07334	0.00635476	0.656185	-0.726408	-0.384515	-1.20468	0.600958	-1.25366	-1.34703	-1.00706	BSG	Basigin	P35613	1.02177	0.000417844	0.0167295	-0.456723	sp|P35613|BASI_HUMAN Basigin OS=Homo sapiens OX=9606 GN=BSG PE=1 SV=2	FUNCTION: [Isoform 1]: Essential for normal retinal maturation and development (By similarity). Acts as a retinal cell surface receptor for NXNL1 and plays an important role in NXNL1-mediated survival of retinal cone photoreceptors (PubMed:25957687). In association with glucose transporter SLC16A1/GLUT1 and NXNL1, promotes retinal cone survival by enhancing aerobic glycolysis and accelerating the…	SUBCELLULAR LOCATION: Melanosome {ECO:0000269|PubMed:17081065}. Note=Identified by mass spectrometry in melanosome fractions from stage I to stage IV. {ECO:0000269|PubMed:17081065}.; SUBCELLULAR LOCATION: [Isoform 1]: Cell membrane {ECO:0000269|PubMed:25957687}; Single-pass type I membrane protein {ECO:0000250|UniProtKB:P26453}. Photoreceptor inner segment {ECO:0000250|UniProtKB:P18572}. Cell pro…		angiogenesis [GO:0001525]; axon guidance [GO:0007411]; cell surface receptor signaling pathway [GO:0007166]; decidualization [GO:0046697]; dendrite self-avoidance [GO:0070593]; embryo implantation [GO:0007566]; endothelial tube morphogenesis [GO:0061154]; extracellular matrix disassembly [GO:0022617]; extracellular matrix organization [GO:0030198]; homophilic cell adhesion via plasma membrane adh…	cadherin binding [GO:0045296]; cell-cell adhesion mediator activity [GO:0098632]; mannose binding [GO:0005537]; signaling receptor activity [GO:0038023]; virus receptor activity [GO:0001618]	acrosomal membrane [GO:0002080]; axon [GO:0030424]; basolateral plasma membrane [GO:0016323]; endoplasmic reticulum membrane [GO:0005789]; endosome [GO:0005768]; extracellular exosome [GO:0070062]; focal adhesion [GO:0005925]; Golgi membrane [GO:0000139]; integral component of plasma membrane [GO:0005887]; intracellular membrane-bounded organelle [GO:0043231]; melanosome [GO:0042470]; membrane [G…	GO:0000139; GO:0001525; GO:0001618; GO:0001750; GO:0001917; GO:0002080; GO:0003407; GO:0005537; GO:0005739; GO:0005768; GO:0005789; GO:0005886; GO:0005887; GO:0005925; GO:0006090; GO:0007156; GO:0007166; GO:0007411; GO:0007566; GO:0010575; GO:0010595; GO:0016020; GO:0016323; GO:0022617; GO:0030198; GO:0030424; GO:0030593; GO:0032755; GO:0038023; GO:0042383; GO:0042470; GO:0042475; GO:0043231; GO:…	R-HSA-1474228;R-HSA-210991;R-HSA-216083;R-HSA-433692;R-HSA-5619070;R-HSA-70268;	hsa:682;	21.2691	21.7469	21.4504	21.4358	21.5286	21.2082	21.4033	20.9881	21.0908	20.8444	21.3868	20.8297	20.8017	20.9038
CISD3_P0C7P0	-0.0721511	0.99919	1.52373	0.654452	0.867772	0.496987	0.891285	-1.75596	-0.254281	-0.585804	0.156039	-0.788613	-1.78757	-0.345084	CISD3	CDGSH iron-sulfur domain-containing protein 3, mitochondrial	P0C7P0	1.01892	0.000418824	0.0167295	-0.335498	sp|P0C7P0|CISD3_HUMAN CDGSH iron-sulfur domain-containing protein 3, mitochondrial OS=Homo sapiens OX=9606 GN=CISD3 PE=1 SV=1	FUNCTION: Can transfer its iron-sulfur clusters to the apoferrodoxins FDX1 and FDX2. Contributes to mitochondrial iron homeostasis and in maintaining normal levels of free iron and reactive oxygen species, and thereby contributes to normal mitochondrial function. {ECO:0000269|PubMed:29259115}.	SUBCELLULAR LOCATION: Mitochondrion {ECO:0000269|PubMed:17376863}.		protein maturation by [2Fe-2S] cluster transfer [GO:0106034]	2 iron, 2 sulfur cluster binding [GO:0051537]; metal ion binding [GO:0046872]	mitochondrion [GO:0005739]	GO:0005739; GO:0046872; GO:0051537; GO:0106034		hsa:284106;	17.8845	18.1191	18.234	18.0436	18.0904	18.0091	18.0955	17.5157	17.8446	17.772	17.9345	17.7276	17.5088	17.8247
CPS1_P31327	1.104	1.09897	0.00743509	1.36587	1.2979	0.868986	0.372544	-1.32292	-1.16313	-0.224257	-0.983194	-0.632658	-0.957716	-0.831811	CPS1	Carbamoyl-phosphate synthase [ammonia], mitochondrial	P31327	1.01871	0.000427603	0.0169934	-0.376951	sp|P31327|CPSM_HUMAN Carbamoyl-phosphate synthase [ammonia], mitochondrial OS=Homo sapiens OX=9606 GN=CPS1 PE=1 SV=2	FUNCTION: Involved in the urea cycle of ureotelic animals where the enzyme plays an important role in removing excess ammonia from the cell.	SUBCELLULAR LOCATION: Mitochondrion {ECO:0000269|PubMed:22002106}. Nucleus, nucleolus {ECO:0000269|PubMed:22002106}.	DISEASE: Carbamoyl phosphate synthetase 1 deficiency (CPS1D) [MIM:237300]: An autosomal recessive disorder of the urea cycle causing hyperammonemia. It can present as a devastating metabolic disease dominated by severe hyperammonemia in neonates or as a more insidious late-onset condition, generally manifesting as life-threatening hyperammonemic crises under catabolic situations. Clinical feature…	'de novo' pyrimidine nucleobase biosynthetic process [GO:0006207]; anion homeostasis [GO:0055081]; carbamoyl phosphate biosynthetic process [GO:0070409]; cellular response to ammonium ion [GO:0071242]; cellular response to cAMP [GO:0071320]; cellular response to fibroblast growth factor stimulus [GO:0044344]; cellular response to glucagon stimulus [GO:0071377]; cellular response to oleic acid [GO…	ATP binding [GO:0005524]; calcium ion binding [GO:0005509]; carbamoyl-phosphate synthase (ammonia) activity [GO:0004087]; carbamoyl-phosphate synthase (glutamine-hydrolyzing) activity [GO:0004088]; endopeptidase activity [GO:0004175]; glutamate binding [GO:0016595]; modified amino acid binding [GO:0072341]; phospholipid binding [GO:0005543]; protein-containing complex binding [GO:0044877]	cytoplasm [GO:0005737]; mitochondrial inner membrane [GO:0005743]; mitochondrial matrix [GO:0005759]; mitochondrial nucleoid [GO:0042645]; nucleolus [GO:0005730]; protein-containing complex [GO:0032991]	GO:0000050; GO:0004087; GO:0004088; GO:0004175; GO:0005509; GO:0005524; GO:0005543; GO:0005730; GO:0005737; GO:0005743; GO:0005759; GO:0006207; GO:0006541; GO:0006807; GO:0007494; GO:0009636; GO:0010043; GO:0014075; GO:0016595; GO:0019240; GO:0019433; GO:0032094; GO:0032496; GO:0032991; GO:0042311; GO:0042493; GO:0042594; GO:0042645; GO:0043200; GO:0044344; GO:0044877; GO:0046209; GO:0050667; GO:…	R-HSA-70635;	hsa:1373;	20.5756	20.5745	20.339	20.6321	20.6174	20.5249	20.4178	20.052	20.0865	20.289	20.1253	20.2009	20.1308	20.158
TPRN_Q4KMQ1	-0.422848	0.171096	-0.561333	-1.11893	-1.3193	-0.489358	-1.14754	1.10261	1.73707	1.77924	-0.311407	0.218294	-0.218036	0.580444	TPRN	Taperin	Q4KMQ1	1.02762	0.000439072	0.0172719	0.403993	sp|Q4KMQ1|TPRN_HUMAN Taperin OS=Homo sapiens OX=9606 GN=TPRN PE=1 SV=2		SUBCELLULAR LOCATION: Cell projection, stereocilium {ECO:0000250}. Note=Localized prominently at the taper regions of hair cell stereocilia. {ECO:0000250}.	DISEASE: Deafness, autosomal recessive, 79 (DFNB79) [MIM:613307]: A form of non-syndromic deafness characterized by progressive and severe sensorineural hearing loss. There are no symptoms of vestibular dysfunction. {ECO:0000269|PubMed:20170898, ECO:0000269|PubMed:20170899}. Note=The disease is caused by variants affecting the gene represented in this entry.	auditory receptor cell stereocilium organization [GO:0060088]; sensory perception of sound [GO:0007605]; stereocilium maintenance [GO:0120045]	phosphatase binding [GO:0019902]	stereocilium [GO:0032420]; stereocilium base [GO:0120044]	GO:0007605; GO:0019902; GO:0032420; GO:0060088; GO:0120044; GO:0120045		hsa:286262;	14.7066	14.8784	14.6665	14.5052	14.4473	14.6873	14.4969	15.1478	15.3314	15.3435	14.7388	14.892	14.7658	14.9968
BRD4_O60885	0.470378	1.93462	0.902941	0.859232	0.863123	0.284565	0.226731	-0.472725	-0.145213	-1.36074	-0.13931	-1.06699	-1.71412	-0.642488	BRD4	Bromodomain-containing protein 4	O60885	1.01688	0.000445385	0.0172719	-0.328073	sp|O60885|BRD4_HUMAN Bromodomain-containing protein 4 OS=Homo sapiens OX=9606 GN=BRD4 PE=1 SV=2	FUNCTION: Chromatin reader protein that recognizes and binds acetylated histones and plays a key role in transmission of epigenetic memory across cell divisions and transcription regulation. Remains associated with acetylated chromatin throughout the entire cell cycle and provides epigenetic memory for postmitotic G1 gene transcription by preserving acetylated chromatin status and maintaining hig…	SUBCELLULAR LOCATION: Nucleus {ECO:0000269|PubMed:16109376}. Chromosome {ECO:0000269|PubMed:16109376, ECO:0000269|PubMed:21890894}. Note=Associates with acetylated chromatin (PubMed:21890894, PubMed:16109376). Released from chromatin upon deacetylation of histones that can be triggered by different signals such as activation of the JNK pathway or nocodazole treatment (PubMed:21890894, PubMed:1610…	DISEASE: Note=A chromosomal aberration involving BRD4 is found in a rare, aggressive, and lethal carcinoma arising in midline organs of young people. Translocation t(15;19)(q14;p13) with NUTM1 which produces a BRD4-NUTM1 fusion protein. {ECO:0000269|PubMed:11733348, ECO:0000269|PubMed:12543779}.	cellular response to DNA damage stimulus [GO:0006974]; chromatin organization [GO:0006325]; chromatin remodeling [GO:0006338]; negative regulation by host of viral transcription [GO:0043922]; negative regulation of DNA damage checkpoint [GO:2000002]; positive regulation of G2/M transition of mitotic cell cycle [GO:0010971]; positive regulation of histone H3-K36 trimethylation [GO:2001255]; positi…	chromatin binding [GO:0003682]; enzyme binding [GO:0019899]; lysine-acetylated histone binding [GO:0070577]; p53 binding [GO:0002039]; P-TEFb complex binding [GO:0106140]; RNA polymerase II CTD heptapeptide repeat kinase activity [GO:0008353]; RNA polymerase II C-terminal domain binding [GO:0099122]; transcription coactivator activity [GO:0003713]; transcription coregulator activity [GO:0003712]	chromosome [GO:0005694]; condensed nuclear chromosome [GO:0000794]; nucleoplasm [GO:0005654]; nucleus [GO:0005634]	GO:0000083; GO:0000794; GO:0002039; GO:0003682; GO:0003712; GO:0003713; GO:0005634; GO:0005654; GO:0005694; GO:0006325; GO:0006338; GO:0006974; GO:0008353; GO:0010971; GO:0016032; GO:0019899; GO:0032968; GO:0043123; GO:0043922; GO:0045893; GO:0045944; GO:0050727; GO:0070577; GO:0099122; GO:0106140; GO:1901407; GO:2000002; GO:2001255	R-HSA-9679191;	hsa:23476;	19.6978	20.0012	19.7874	19.7783	19.7791	19.6593	19.6473	19.5024	19.5702	19.3183	19.5714	19.3792	19.2451	19.4672
KPNA2_P52292	0.334892	-2	-1.22339	-1.13901	-0.3126	-0.38062	-0.514845	1.74995	0.538477	0.324161	0.346528	0.707008	0.745925	0.871291	KPNA2	Importin subunit alpha-1	P52292	1.01684	0.000446416	0.0172719	0.305613	sp|P52292|IMA1_HUMAN Importin subunit alpha-1 OS=Homo sapiens OX=9606 GN=KPNA2 PE=1 SV=1	FUNCTION: Functions in nuclear protein import as an adapter protein for nuclear receptor KPNB1. Binds specifically and directly to substrates containing either a simple or bipartite NLS motif. Docking of the importin/substrate complex to the nuclear pore complex (NPC) is mediated by KPNB1 through binding to nucleoporin FxFG repeats and the complex is subsequently translocated through the pore by …	SUBCELLULAR LOCATION: Cytoplasm {ECO:0000269|PubMed:7604027}. Nucleus {ECO:0000269|PubMed:7604027}.; SUBCELLULAR LOCATION: Endoplasmic reticulum membrane. Golgi apparatus membrane {ECO:0000269|PubMed:17596301}. Note=(Microbial infection) Retained in ER/Golgi membranes upon interaction with SARS-COV virus ORF6 protein. {ECO:0000269|PubMed:17596301}.		DNA metabolic process [GO:0006259]; double-strand break repair [GO:0006302]; entry of viral genome into host nucleus through nuclear pore complex via importin [GO:0075506]; modulation by virus of host cellular process [GO:0019054]; NLS-bearing protein import into nucleus [GO:0006607]; positive regulation of viral life cycle [GO:1903902]; postsynapse to nucleus signaling pathway [GO:0099527]; regu…	histone deacetylase binding [GO:0042826]; nuclear import signal receptor activity [GO:0061608]; nuclear localization sequence binding [GO:0008139]; RNA binding [GO:0003723]	cytoplasm [GO:0005737]; cytosol [GO:0005829]; endoplasmic reticulum membrane [GO:0005789]; extrinsic component of postsynaptic specialization membrane [GO:0098892]; glutamatergic synapse [GO:0098978]; Golgi membrane [GO:0000139]; host cell [GO:0043657]; membrane [GO:0016020]; nucleoplasm [GO:0005654]; nucleus [GO:0005634]	GO:0000018; GO:0000139; GO:0003723; GO:0005634; GO:0005654; GO:0005737; GO:0005789; GO:0005829; GO:0006259; GO:0006302; GO:0006607; GO:0008139; GO:0016020; GO:0019054; GO:0042826; GO:0043657; GO:0061608; GO:0075506; GO:0098892; GO:0098978; GO:0099527; GO:1903902	R-HSA-111932;R-HSA-1169408;R-HSA-168276;R-HSA-442729;R-HSA-5693548;R-HSA-9018519;	hsa:3838;	18.3706	17.8883	18.0552	18.0722	18.2395	18.2258	18.1986	18.6571	18.4119	18.3685	18.373	18.446	18.4539	18.4792
GATM_P50440	-0.0868027	1.77156	1.52367	-0.737096	0.676028	0.589405	1.4256	-0.821677	-0.505775	-1.10239	-0.98715	-0.626168	-0.641148	-0.478061	GATM	Glycine amidinotransferase, mitochondrial	P50440	1.03399	0.000447544	0.0172719	-0.665099	sp|P50440|GATM_HUMAN Glycine amidinotransferase, mitochondrial OS=Homo sapiens OX=9606 GN=GATM PE=1 SV=1	FUNCTION: Catalyzes the biosynthesis of guanidinoacetate, the immediate precursor of creatine. Creatine plays a vital role in energy metabolism in muscle tissues. May play a role in embryonic and central nervous system development. May be involved in the response to heart failure by elevating local creatine synthesis. {ECO:0000269|PubMed:16125225, ECO:0000269|PubMed:16614068, ECO:0000269|PubMed:1…	SUBCELLULAR LOCATION: [Isoform 1]: Mitochondrion inner membrane; Peripheral membrane protein; Intermembrane side. Note=Probably attached to the outer side of the inner membrane.; SUBCELLULAR LOCATION: [Isoform 2]: Cytoplasm.	DISEASE: Cerebral creatine deficiency syndrome 3 (CCDS3) [MIM:612718]: An autosomal recessive disorder characterized by developmental delay/regression, mental retardation, severe disturbance of expressive and cognitive speech, and severe depletion of creatine/phosphocreatine in the brain. Most patients develop a myopathy characterized by muscle weakness and atrophy later in life. {ECO:0000269|Pub…	creatine biosynthetic process [GO:0006601]; creatine metabolic process [GO:0006600]; learning or memory [GO:0007611]; multicellular organism development [GO:0007275]; muscle atrophy [GO:0014889]; positive regulation of cold-induced thermogenesis [GO:0120162]	amidinotransferase activity [GO:0015067]; glycine amidinotransferase activity [GO:0015068]	extracellular exosome [GO:0070062]; mitochondrial inner membrane [GO:0005743]; mitochondrial intermembrane space [GO:0005758]; mitochondrion [GO:0005739]	GO:0005739; GO:0005743; GO:0005758; GO:0006600; GO:0006601; GO:0007275; GO:0007611; GO:0014889; GO:0015067; GO:0015068; GO:0070062; GO:0120162	R-HSA-71288;	hsa:2628;	19.8597	20.6977	20.5859	19.5665	20.2037	20.1647	20.5417	19.5284	19.6708	19.4018	19.4538	19.6165	19.6098	19.6833
DNAJC7_Q99615	-0.285329	-1.75754	-1.39994	-0.70261	-0.669627	-0.423341	-0.390338	1.3117	0.361948	0.771301	0.161335	0.992209	1.74937	0.28086	DNAJC7	DnaJ homolog subfamily C member 7	Q99615	1.01731	0.000448976	0.0172719	0.327303	sp|Q99615|DNJC7_HUMAN DnaJ homolog subfamily C member 7 OS=Homo sapiens OX=9606 GN=DNAJC7 PE=1 SV=2	FUNCTION: Acts as co-chaperone regulating the molecular chaperones HSP70 and HSP90 in folding of steroid receptors, such as the glucocorticoid receptor and the progesterone receptor. Proposed to act as a recycling chaperone by facilitating the return of chaperone substrates to early stages of chaperoning if further folding is required. In vitro, induces ATP-independent dissociation of HSP90 but n…	SUBCELLULAR LOCATION: Cytoplasm {ECO:0000269|PubMed:11573955, ECO:0000269|PubMed:12853476}. Nucleus {ECO:0000269|PubMed:11573955}. Cytoplasm, cytoskeleton {ECO:0000250|UniProtKB:Q9QYI3}. Note=Colocalizes with NR1I3 to microtubules. {ECO:0000250|UniProtKB:Q9QYI3}.		chaperone cofactor-dependent protein refolding [GO:0051085]; protein folding [GO:0006457]; regulation of cellular response to heat [GO:1900034]	heat shock protein binding [GO:0031072]	cytoplasm [GO:0005737]; cytoskeleton [GO:0005856]; cytosol [GO:0005829]; extracellular exosome [GO:0070062]; membrane [GO:0016020]; nucleoplasm [GO:0005654]	GO:0005654; GO:0005737; GO:0005829; GO:0005856; GO:0006457; GO:0016020; GO:0031072; GO:0051085; GO:0070062; GO:1900034	R-HSA-3371453;	hsa:7266;	19.0188	18.7191	18.7919	18.9338	18.9405	18.9907	18.9974	19.3438	19.1505	19.2338	19.1097	19.2788	19.4329	19.134
NCDN_Q9UBB6	-0.602445	-1.52292	-0.569606	0.283988	-0.465194	-0.740998	-0.740518	0.310161	-0.716582	0.710616	2	0.277854	1.28018	0.0956857	NCDN	Neurochondrin	Q9UBB6	1.02929	0.000451764	0.0172719	0.394017	sp|Q9UBB6|NCDN_HUMAN Neurochondrin OS=Homo sapiens OX=9606 GN=NCDN PE=1 SV=1	FUNCTION: Probably involved in signal transduction, in the nervous system, via increasing cell surface localization of GRM5 and positively regulating its signaling (By similarity). Required for the spatial learning process. Acts as a negative regulator of Ca(2+)-calmodulin-dependent protein kinase 2 (CaMK2) phosphorylation. May play a role in modulating melanin-concentrating hormone-mediated func…	SUBCELLULAR LOCATION: Cytoplasm, cytosol {ECO:0000269|PubMed:23687301}. Endosome membrane {ECO:0000250|UniProtKB:O35095}; Lipid-anchor {ECO:0000305|PubMed:23687301}. Cell projection, dendrite {ECO:0000250|UniProtKB:O35095}. Cell junction, synapse, postsynapse {ECO:0000250|UniProtKB:O35095}. Note=Localizes to somatic regions of neurons. Localization to endosome membrane requires palmitoylation. {E…		bone resorption [GO:0045453]; neuron projection development [GO:0031175]; regulation of neuronal synaptic plasticity [GO:0048168]		cytosol [GO:0005829]; dendrite [GO:0030425]; endosome membrane [GO:0010008]; membrane [GO:0016020]; neuronal cell body [GO:0043025]; perikaryon [GO:0043204]; postsynapse [GO:0098794]	GO:0005829; GO:0010008; GO:0016020; GO:0030425; GO:0031175; GO:0043025; GO:0043204; GO:0045453; GO:0048168; GO:0098794		hsa:23154;	13.4577	13.1664	13.4681	13.7383	13.5012	13.4139	13.414	13.7465	13.4216	13.8733	14.4078	13.7363	14.0535	13.6787
GLDC_P23378	-0.167595	0.0755855	0.231458	-0.0700997	-0.142021	2	1.48418	-1.05908	-0.868854	-1.18854	-1.07744	-0.805453	0.475314	1.04831	GLDC	Glycine dehydrogenase (decarboxylating), mitochondrial	P23378	1.01985	0.000458719	0.0172719	-0.335375	sp|P23378|GCSP_HUMAN Glycine dehydrogenase (decarboxylating), mitochondrial OS=Homo sapiens OX=9606 GN=GLDC PE=1 SV=2	FUNCTION: The glycine cleavage system catalyzes the degradation of glycine. The P protein (GLDC) binds the alpha-amino group of glycine through its pyridoxal phosphate cofactor; CO(2) is released and the remaining methylamine moiety is then transferred to the lipoamide cofactor of the H protein (GCSH). {ECO:0000269|PubMed:1993704, ECO:0000269|PubMed:1996985, ECO:0000269|PubMed:28244183}.	SUBCELLULAR LOCATION: Mitochondrion {ECO:0000269|PubMed:28244183}.	DISEASE: Non-ketotic hyperglycinemia (NKH) [MIM:605899]: Autosomal recessive disease characterized by accumulation of a large amount of glycine in body fluid and by severe neurological symptoms. {ECO:0000269|PubMed:11286506, ECO:0000269|PubMed:11592811, ECO:0000269|PubMed:1634607, ECO:0000269|PubMed:1996985, ECO:0000269|PubMed:28244183, ECO:0000269|PubMed:28737873}. Note=The disease is caused by …	glycine catabolic process [GO:0006546]; glycine decarboxylation via glycine cleavage system [GO:0019464]; protein-containing complex assembly [GO:0065003]; response to lipoic acid [GO:1903442]; response to methylamine [GO:0036255]	electron transfer activity [GO:0009055]; enzyme binding [GO:0019899]; glycine binding [GO:0016594]; glycine dehydrogenase (decarboxylating) activity [GO:0004375]; lyase activity [GO:0016829]; protein homodimerization activity [GO:0042803]; pyridoxal binding [GO:0070280]; pyridoxal phosphate binding [GO:0030170]	glycine cleavage complex [GO:0005960]; mitochondrial matrix [GO:0005759]; mitochondrion [GO:0005739]; nucleoplasm [GO:0005654]; plasma membrane [GO:0005886]	GO:0004375; GO:0005654; GO:0005739; GO:0005759; GO:0005886; GO:0005960; GO:0006546; GO:0009055; GO:0016594; GO:0016829; GO:0019464; GO:0019899; GO:0030170; GO:0036255; GO:0042803; GO:0065003; GO:0070280; GO:1903442	R-HSA-6783984;	hsa:2731;	17.0092	17.0913	17.144	17.0421	17.0178	17.7629	17.567	16.7081	16.7724	16.6644	16.7019	16.7938	17.2263	17.4198
SMTN_P53814	-0.324311	0.186056	-0.308239	-1.13124	-1.01047	-0.939673	-1.04118	0.412024	1.67227	2	-0.0141845	0.685757	-0.130284	-0.284288	SMTN	Smoothelin	P53814	1.02436	0.000461948	0.0172719	0.433649	sp|P53814|SMTN_HUMAN Smoothelin OS=Homo sapiens OX=9606 GN=SMTN PE=1 SV=7	FUNCTION: Structural protein of the cytoskeleton.	SUBCELLULAR LOCATION: Cytoplasm, cytoskeleton. Note=Exhibits a filamentous organization.		actin cytoskeleton organization [GO:0030036]; muscle organ development [GO:0007517]; smooth muscle contraction [GO:0006939]	actin binding [GO:0003779]; structural constituent of muscle [GO:0008307]	actin cytoskeleton [GO:0015629]; cytoplasm [GO:0005737]; cytoskeleton [GO:0005856]; filamentous actin [GO:0031941]; microtubule organizing center [GO:0005815]	GO:0003779; GO:0005737; GO:0005815; GO:0005856; GO:0006939; GO:0007517; GO:0008307; GO:0015629; GO:0030036; GO:0031941		hsa:6525;	17.9076	18.0771	17.9129	17.6395	17.6797	17.7032	17.6695	18.1522	18.5708	18.7554	18.0106	18.2431	17.9721	17.9209
PPL_O60437	-0.41621	0.802473	1.40446	0.756028	1.09536	0.990483	1.0148	-1.08061	-1.45453	0.119668	-0.757889	-1.04339	-1.18645	-0.244166	PPL	Periplakin	O60437	1.01448	0.000462509	0.0172719	-0.316903	sp|O60437|PEPL_HUMAN Periplakin OS=Homo sapiens OX=9606 GN=PPL PE=1 SV=4	FUNCTION: Component of the cornified envelope of keratinocytes. May link the cornified envelope to desmosomes and intermediate filaments. May act as a localization signal in PKB/AKT-mediated signaling. {ECO:0000269|PubMed:9412476}.	SUBCELLULAR LOCATION: Cell junction, desmosome {ECO:0000269|PubMed:9412476}. Cytoplasm, cytoskeleton {ECO:0000269|PubMed:9412476}. Cell membrane {ECO:0000250|UniProtKB:Q9R269}. Cytoplasm {ECO:0000250|UniProtKB:Q9R269}.		adaptive immune response [GO:0002250]; cornification [GO:0070268]; intermediate filament cytoskeleton organization [GO:0045104]; response to mechanical stimulus [GO:0009612]; wound healing [GO:0042060]	cadherin binding [GO:0045296]; structural constituent of cytoskeleton [GO:0005200]; structural molecule activity [GO:0005198]	cornified envelope [GO:0001533]; cytoplasm [GO:0005737]; cytoskeleton [GO:0005856]; cytosol [GO:0005829]; desmosome [GO:0030057]; extracellular exosome [GO:0070062]; membrane [GO:0016020]; plasma membrane [GO:0005886]	GO:0001533; GO:0002250; GO:0005198; GO:0005200; GO:0005737; GO:0005829; GO:0005856; GO:0005886; GO:0009612; GO:0016020; GO:0030057; GO:0042060; GO:0045104; GO:0045296; GO:0070062; GO:0070268	R-HSA-6809371;R-HSA-8851680;	hsa:5493;	21.959	22.1984	22.3166	22.1892	22.2559	22.2353	22.2401	21.8285	21.7551	22.0643	21.8919	21.8358	21.8077	21.9928
CYP2J2_P51589	0.00161141	-0.647231	-0.0702429	-1.00558	-1.47913	-1.16627	-1.20614	0.893988	1.10716	-0.0655543	1.57511	1.03989	0.984409	0.03798	CYP2J2	Cytochrome P450 2J2	P51589	1.04944	0.000462885	0.0172719	0.788018	sp|P51589|CP2J2_HUMAN Cytochrome P450 2J2 OS=Homo sapiens OX=9606 GN=CYP2J2 PE=1 SV=2	FUNCTION: A cytochrome P450 monooxygenase involved in the metabolism of polyunsaturated fatty acids (PUFA) in the cardiovascular system (PubMed:8631948, PubMed:19965576). Mechanistically, uses molecular oxygen inserting one oxygen atom into a substrate, and reducing the second into a water molecule, with two electrons provided by NADPH via cytochrome P450 reductase (NADPH--hemoprotein reductase) …	SUBCELLULAR LOCATION: Endoplasmic reticulum membrane; Peripheral membrane protein. Microsome membrane {ECO:0000269|PubMed:8631948}; Peripheral membrane protein.		epoxygenase P450 pathway [GO:0019373]; exogenous drug catabolic process [GO:0042738]; fatty acid metabolic process [GO:0006631]; icosanoid metabolic process [GO:0006690]; linoleic acid metabolic process [GO:0043651]; organic acid metabolic process [GO:0006082]; regulation of heart contraction [GO:0008016]; xenobiotic metabolic process [GO:0006805]	arachidonic acid 11,12-epoxygenase activity [GO:0008405]; arachidonic acid 14,15-epoxygenase activity [GO:0008404]; arachidonic acid 5,6-epoxygenase activity [GO:0106301]; arachidonic acid epoxygenase activity [GO:0008392]; heme binding [GO:0020037]; hydroperoxy icosatetraenoate isomerase activity [GO:0106255]; iron ion binding [GO:0005506]; isomerase activity [GO:0016853]; linoleic acid epoxygen…	cytoplasm [GO:0005737]; endoplasmic reticulum membrane [GO:0005789]; extracellular exosome [GO:0070062]; intracellular membrane-bounded organelle [GO:0043231]	GO:0005506; GO:0005737; GO:0005789; GO:0006082; GO:0006631; GO:0006690; GO:0006805; GO:0008016; GO:0008392; GO:0008395; GO:0008404; GO:0008405; GO:0016712; GO:0016853; GO:0019373; GO:0020037; GO:0042738; GO:0043231; GO:0043651; GO:0070062; GO:0071614; GO:0106255; GO:0106301	R-HSA-211935;R-HSA-211981;R-HSA-2142670;	hsa:1573;	16.3331	16.012	16.2975	15.8346	15.6003	15.7551	15.7354	16.7747	16.8802	16.2998	17.1118	16.8469	16.8195	16.3511
NEBL_O76041	0.658167	1.28005	0.191295	0.765276	1.8698	0.271165	0.912338	-1.01322	-0.300619	-0.523737	-0.809752	-1.00895	-1.47212	-0.819692	NEBL	Nebulette	O76041	1.01362	0.000463069	0.0172719	-0.31704	sp|O76041|NEBL_HUMAN Nebulette OS=Homo sapiens OX=9606 GN=NEBL PE=1 SV=1	FUNCTION: Binds to actin and plays an important role in the assembly of the Z-disk. May functionally link sarcomeric actin to the desmin intermediate filaments in the heart muscle sarcomeres (PubMed:27733623). Isoform 2 might play a role in the assembly of focal adhesion (PubMed:15004028). {ECO:0000269|PubMed:15004028, ECO:0000269|PubMed:27733623}.	SUBCELLULAR LOCATION: [Isoform 2]: Cytoplasm {ECO:0000269|PubMed:15004028}.		cardiac muscle thin filament assembly [GO:0071691]; muscle fiber development [GO:0048747]	actin filament binding [GO:0051015]; cytoskeletal protein binding [GO:0008092]; filamin binding [GO:0031005]; structural constituent of muscle [GO:0008307]; tropomyosin binding [GO:0005523]	extracellular exosome [GO:0070062]; I band [GO:0031674]; stress fiber [GO:0001725]; Z disc [GO:0030018]	GO:0001725; GO:0005523; GO:0008092; GO:0008307; GO:0030018; GO:0031005; GO:0031674; GO:0048747; GO:0051015; GO:0070062; GO:0071691		hsa:10529;	23.5656	23.6816	23.4785	23.5856	23.7917	23.4934	23.613	23.2538	23.3868	23.3451	23.2918	23.2546	23.1682	23.2899
GPX7_Q96SL4	-0.33122	-0.107568	0.529176	0.239365	0.443888	1.2682	2	-1.14288	-0.257174	-0.204412	-1.15144	-1.07945	-1.05859	0.519675	GPX7	Glutathione peroxidase 7	Q96SL4	1.0478	0.000463427	0.0172719	-0.759336	sp|Q96SL4|GPX7_HUMAN Glutathione peroxidase 7 OS=Homo sapiens OX=9606 GN=GPX7 PE=1 SV=1	FUNCTION: It protects esophageal epithelia from hydrogen peroxide-induced oxidative stress. It suppresses acidic bile acid-induced reactive oxigen species (ROS) and protects against oxidative DNA damage and double-strand breaks. {ECO:0000269|PubMed:22157330}.	SUBCELLULAR LOCATION: Secreted {ECO:0000305}.	DISEASE: Barrett esophagus (BE) [MIM:614266]: A condition characterized by a metaplastic change in which normal esophageal squamous epithelium is replaced by a columnar and intestinal-type epithelium. Patients with Barrett esophagus have an increased risk of esophageal adenocarcinoma. The main cause of Barrett esophagus is gastroesophageal reflux. The retrograde movement of acid and bile salts fr…	cellular response to oxidative stress [GO:0034599]	catalase activity [GO:0004096]; glutathione peroxidase activity [GO:0004602]; peroxidase activity [GO:0004601]	endoplasmic reticulum [GO:0005783]; endoplasmic reticulum lumen [GO:0005788]; extracellular region [GO:0005576]	GO:0004096; GO:0004601; GO:0004602; GO:0005576; GO:0005783; GO:0005788; GO:0034599	R-HSA-3299685;	hsa:2882;	16.0645	16.2004	16.5872	16.4111	16.5354	17.0362	17.6828	15.5713	16.1095	16.1415	15.5661	15.6099	15.6225	16.5815
SLC9A1_P19634	-0.0493009	1.26154	1.67377	0.555551	1.16023	0.331893	0.914996	-0.367955	-0.856319	-1.60588	-0.383192	-1.01993	-0.985307	-0.630081	SLC9A1	Sodium/hydrogen exchanger 1	P19634	1.03765	0.00046646	0.0172719	-0.655137	sp|P19634|SL9A1_HUMAN Sodium/hydrogen exchanger 1 OS=Homo sapiens OX=9606 GN=SLC9A1 PE=1 SV=2	FUNCTION: Involved in pH regulation to eliminate acids generated by active metabolism or to counter adverse environmental conditions. Major proton extruding system driven by the inward sodium ion chemical gradient. Plays an important role in signal transduction. {ECO:0000269|PubMed:11350981, ECO:0000269|PubMed:15035633, ECO:0000269|PubMed:8901634}.	SUBCELLULAR LOCATION: Membrane; Multi-pass membrane protein. Endoplasmic reticulum membrane {ECO:0000250}; Multi-pass membrane protein {ECO:0000250}. Cell membrane; Multi-pass membrane protein. Note=Colocalizes with CHP1 at the reticulum endoplasmic (By similarity). Colocalizes with CHP1 and CHP2 at the plasma membrane. {ECO:0000250}.	DISEASE: Lichtenstein-Knorr syndrome (LIKNS) [MIM:616291]: An autosomal recessive neurologic disorder characterized by progressive cerebellar ataxia and severe progressive sensorineural hearing loss. {ECO:0000269|PubMed:25205112, ECO:0000269|PubMed:30237576}. Note=The disease is caused by variants affecting the gene represented in this entry.	cardiac muscle cell contraction [GO:0086003]; cardiac muscle cell differentiation [GO:0055007]; cell migration [GO:0016477]; cellular response to acidic pH [GO:0071468]; cellular response to antibiotic [GO:0071236]; cellular response to cold [GO:0070417]; cellular response to electrical stimulus [GO:0071257]; cellular response to epinephrine stimulus [GO:0071872]; cellular response to hypoxia [GO…	calcium-dependent protein binding [GO:0048306]; calmodulin binding [GO:0005516]; molecular adaptor activity [GO:0060090]; phosphatidylinositol-4,5-bisphosphate binding [GO:0005546]; potassium:proton antiporter activity [GO:0015386]; protein-macromolecule adaptor activity [GO:0030674]; protein phosphatase 2B binding [GO:0030346]; sodium:proton antiporter activity [GO:0015385]; sodium:proton antipo…	apical plasma membrane [GO:0016324]; basolateral plasma membrane [GO:0016323]; cation-transporting ATPase complex [GO:0090533]; cell surface [GO:0009986]; cytoplasm [GO:0005737]; endoplasmic reticulum [GO:0005783]; endoplasmic reticulum membrane [GO:0005789]; extracellular exosome [GO:0070062]; focal adhesion [GO:0005925]; integral component of membrane [GO:0016021]; integral component of plasma …	GO:0005516; GO:0005546; GO:0005654; GO:0005737; GO:0005739; GO:0005783; GO:0005789; GO:0005886; GO:0005887; GO:0005925; GO:0006811; GO:0006883; GO:0006885; GO:0009986; GO:0010447; GO:0010613; GO:0010882; GO:0014704; GO:0015299; GO:0015385; GO:0015386; GO:0016021; GO:0016323; GO:0016324; GO:0016477; GO:0030011; GO:0030027; GO:0030214; GO:0030307; GO:0030315; GO:0030346; GO:0030674; GO:0032869; GO:…	R-HSA-2160916;R-HSA-425986;	hsa:6548;	17.7096	18.2235	18.3851	17.9467	18.1838	17.8591	18.0877	17.5847	17.3932	17.0993	17.5787	17.3291	17.3426	17.4819
[truncated: 7,619 more rows]

## Sheet: (B)Phospho
	Normalized Log2 Intensity, Row Z Score																		fX403																	Normalized Log2 Intensity
[truncated: 4,363 more rows]
