# Supplementary material for: Multi-Omics Profiling of Hypertrophic Cardiomyopathy Reveals Altered Mechanisms in Mitochondrial Dynamics and Excitation–Contraction Coupling
Source: Int J Mol Sci. 2023 Mar 1;24(5):4724. doi: 10.3390/ijms24054724 (PMC10002553; doi:10.3390/ijms24054724)
Supplement: Supplementary file 1 [file ijms-24-04724-s001.zip › Supp_Table_S2.xlsx]

## Sheet: fgsea_Proteomics_fX403
Term	Description	p.Val	FDR	Phenotype	Genes	NES	ES	Gene_Hits	Gene_Total
MOVEMENT OF CELL OR SUBCELLULAR COMPONENT%GOBP%GO:0006928	MOVEMENT OF CELL OR SUBCELLULAR COMPONENT%GOBP%GO:0006928	0.000114758	0.00533774	-1	MYH6,LAMA2,LAMB1,LGALS8,ADD2,LAMC3,CACNB2,CD99,GPC1,LAMC1,VSTM2L,ATP1A1,YES1,F11R,ICAM1,LAMC2,EFNB3,BSG,SLC9A1,FOLR1,ENG,LAMB3,ATP1B2,LAMA3,CTNNA3,CENPV,JUP,FGF13,LAMA5,ADAM17,LAMA1,LAMB2,COL5A1,EPHB2,LOXL2,ARHGEF16,RAB13,DAB1,CD9,SLC9A3R1,MYO1C,MYH8,NRP2,ITGB6,SRPX2,PODXL,MYH3,CD44,FN1,CTNNA1,SIRPA,SEMA4B,MBOAT7,LYN,P2RX4,IQGAP1,PIP5K1A,MYO1D,CXADR,PIK3C2A,NRP1,PIP5K1C,PAK1,MMP14,CD2AP,SDC3,EMIL…	-1.44099	-0.332076	111	486
TISSUE DEVELOPMENT%GOBP%GO:0009888	TISSUE DEVELOPMENT%GOBP%GO:0009888	0.000117028	0.00533774	-1	MYH6,LAMA2,COL2A1,PCK2,MARVELD2,DSG2,COL4A1,STC1,LAMB1,POF1B,BMP10,LAMC3,COL11A2,HSPG2,LAMC1,F11R,LOXL3,ICAM1,LAMC2,NEBL,COL6A1,DSP,FOLR1,ENG,LAMB3,LAMA3,ITGA6,LIN7C,LAMA5,SLC4A7,BMP7,FLOT2,ADAM17,LAMA1,LAMB2,RCN3,COL5A1,LOXL2,AGRN,RAB13,CRIP1,ZNF516,SLC9A3R1,NRP2,ERCC2,TCAP,PODXL,TJP1,HEY2,TCOF1,RAP2C,CD44,FN1,COL1A1,SEMA4B,NPNT,ATP7A,SPRY1,IQGAP1,JAG2,MMP2,PIP5K1A,CXADR,PLOD1,KDM2B,STRA6,NRP1,W…	-1.66938	-0.388552	118	421
REGULATION OF CELLULAR COMPONENT MOVEMENT%GOBP%GO:0051270	REGULATION OF CELLULAR COMPONENT MOVEMENT%GOBP%GO:0051270	0.000118078	0.00533774	-1	MOSPD2,DSG2,STC1,MTUS1,LAMB1,THY1,BMP10,RECK,DSC2,CD99,PODN,ICAM1,LAMC2,SH3RF2,DSP,ENG,ATP1B2,ANO6,CTNNA3,ITGA6,JUP,FGF13,CDH1,GNA12,ADAM17,SP100,EPHB2,CD9,LRP1,ADAM10,MYO1C,NRP2,MPP1,SRPX2,PODXL,TJP1,RAP2C,DCN,DLG1,ROR2,FN1,COL1A1,ZNF609,SEMA4B,BMPER,ST3GAL4,LYN,P2RX4,ZMYND8,SFRP1,SP1,BST2,PIK3C2A,NRP1,WNT11,PAK1,MMP14,EMILIN1,HRAS,SEMA4D,VTN,PLXND1,PDGFB,ADAMTS9,CACNA1C,DDX58,SEMA3C,SERPINE2,ME…	-1.51127	-0.353093	109	399
LOCOMOTION%GOBP%GO:0040011	LOCOMOTION%GOBP%GO:0040011	0.00011999	0.00533774	-1	LAMA2,LAMB1,LGALS8,ADD2,LAMC3,ATP1A2,CD99,GPC1,LAMC1,VSTM2L,YES1,F11R,ICAM1,LAMC2,EFNB3,BSG,SLC9A1,FOLR1,ENG,LAMB3,ATP1B2,LAMA3,CTNNA3,CENPV,JUP,FGF13,LAMA5,PLAUR,ADAM17,LAMA1,LAMB2,COL5A1,EPHB2,LOXL2,ARHGEF16,RAB13,DAB1,CD9,NRP2,APOA1,ITGB6,SRPX2,PODXL,CD44,FN1,CTNNA1,SIRPA,SEMA4B,MBOAT7,LYN,P2RX4,IQGAP1,PIP5K1A,CXADR,PIK3C2A,NRP1,PIP5K1C,PAK1,MMP14,CD2AP,SDC3,EMILIN1,HRAS,SEMA4D,LIMA1,VTN,PTK7,…	-1.65998	-0.390266	114	364
REGULATION OF CELL MIGRATION%GOBP%GO:0030334	REGULATION OF CELL MIGRATION%GOBP%GO:0030334	0.000120656	0.00533774	-1	MOSPD2,STC1,MTUS1,LAMB1,THY1,BMP10,RECK,CD99,PODN,ICAM1,LAMC2,SH3RF2,ENG,ATP1B2,ANO6,ITGA6,JUP,CDH1,GNA12,ADAM17,SP100,EPHB2,LRP1,ADAM10,MYO1C,NRP2,MPP1,SRPX2,PODXL,TJP1,RAP2C,DCN,ROR2,FN1,COL1A1,ZNF609,SEMA4B,BMPER,ST3GAL4,LYN,P2RX4,ZMYND8,SFRP1,SP1,BST2,PIK3C2A,NRP1,WNT11,PAK1,MMP14,EMILIN1,HRAS,SEMA4D,VTN,PLXND1,PDGFB,ADAMTS9,DDX58,SEMA3C,SERPINE2,MECP2,ADAMTS1,CAMK2B,STK10,SEMA4C,MAGI2,MAZ,IG…	-1.57088	-0.370768	97	347
CELL MOTILITY%GOBP%GO:0048870	CELL MOTILITY%GOBP%GO:0048870	0.000122745	0.00533774	-1	LAMB1,LGALS8,ADD2,LAMC3,CD99,GPC1,LAMC1,YES1,F11R,ICAM1,BSG,SLC9A1,FOLR1,ENG,LAMB3,ATP1B2,LAMA3,CTNNA3,CENPV,JUP,FGF13,LAMA5,ADAM17,LAMB2,COL5A1,LOXL2,ARHGEF16,RAB13,DAB1,CD9,ITGB6,SRPX2,PODXL,CD44,FN1,CTNNA1,SIRPA,SEMA4B,MBOAT7,LYN,P2RX4,IQGAP1,PIP5K1A,CXADR,PIK3C2A,NRP1,PIP5K1C,PAK1,MMP14,CD2AP,SDC3,EMILIN1,SEMA4D,LIMA1,VTN,PTK7,PLXND1,PDGFB,S1PR1,SEMA3C,PLD1,FAT1,AXL,SEMA4C,PRKCD,PAK4,THBS1,RA…	-1.59402	-0.379098	94	309
LOCALIZATION OF CELL%GOBP%GO:0051674	LOCALIZATION OF CELL%GOBP%GO:0051674	0.000122745	0.00533774	-1	LAMB1,LGALS8,ADD2,LAMC3,CD99,GPC1,LAMC1,YES1,F11R,ICAM1,BSG,SLC9A1,FOLR1,ENG,LAMB3,ATP1B2,LAMA3,CTNNA3,CENPV,JUP,FGF13,LAMA5,ADAM17,LAMB2,COL5A1,LOXL2,ARHGEF16,RAB13,DAB1,CD9,ITGB6,SRPX2,PODXL,CD44,FN1,CTNNA1,SIRPA,SEMA4B,MBOAT7,LYN,P2RX4,IQGAP1,PIP5K1A,CXADR,PIK3C2A,NRP1,PIP5K1C,PAK1,MMP14,CD2AP,SDC3,EMILIN1,SEMA4D,LIMA1,VTN,PTK7,PLXND1,PDGFB,S1PR1,SEMA3C,PLD1,FAT1,AXL,SEMA4C,PRKCD,PAK4,THBS1,RA…	-1.59402	-0.379098	94	309
CELL MIGRATION%GOBP%GO:0016477	CELL MIGRATION%GOBP%GO:0016477	0.00012427	0.00533774	-1	LAMB1,LGALS8,ADD2,LAMC3,CD99,GPC1,LAMC1,YES1,F11R,ICAM1,BSG,SLC9A1,FOLR1,ENG,LAMB3,ATP1B2,LAMA3,CTNNA3,CENPV,JUP,FGF13,LAMA5,ADAM17,LAMB2,COL5A1,LOXL2,ARHGEF16,RAB13,DAB1,CD9,ITGB6,PODXL,CD44,FN1,CTNNA1,SIRPA,SEMA4B,MBOAT7,LYN,P2RX4,IQGAP1,PIP5K1A,CXADR,PIK3C2A,NRP1,PIP5K1C,PAK1,CD2AP,SDC3,EMILIN1,SEMA4D,LIMA1,VTN,PTK7,PLXND1,PDGFB,S1PR1,SEMA3C,FAT1,AXL,SEMA4C,PRKCD,PAK4,THBS1,RADIL,PTPRF,RHOQ,FL…	-1.66264	-0.398407	89	286
HEMOSTASIS%REACTOME DATABASE ID RELEASE 77%109582	HEMOSTASIS%REACTOME DATABASE ID RELEASE 77%109582	0.000124378	0.00533774	-1	GNG5,NRAS,ADRA2B,SLC16A3,CD99,ATP2B1,GPC1,ATP1B1,CLU,STXBP2,YES1,F11R,GNB4,BSG,ATP1B2,ITGA6,DOCK9,EHD2,ITPR1,GNAQ,PLAUR,GNA12,STXBP3,CD109,CD9,CD99L2,DOCK11,GNAI3,APOA1,CD44,PHF21A,ITPR3,FN1,GNB1,SIRPA,GNAS,LYN,P2RX4,CXADR,EPCAM,GNAI2,SDC3,HRAS,TMX3,HDAC1,PDGFB,ATP1B3,GNB2,CBX5,SERPINE2,SERPINA1,RAP1B,PRKCD,THBS1,ECM1,TTN,FGG,ATP2B4,TAGLN2,A2M,IGF2,GNA14,TNFRSF10B,IFNA8,RHOA,SIN3A,KIF5C,TOR4A,TIM…	-1.72996	-0.414719	95	285
SIGNALING BY RECEPTOR TYROSINE KINASES%REACTOME%R-HSA-9006934.5	SIGNALING BY RECEPTOR TYROSINE KINASES%REACTOME%R-HSA-9006934.5	0.000124378	0.00533774	-1	NRAS,LAMA2,COL4A1,AHCYL1,LAMB1,LAMC3,LAMA4,COL6A2,LAMC1,ATF2,COL4A5,YES1,LAMC2,COL6A1,LAMB3,LAMA3,JUP,LAMA5,ITPR1,COL6A3,ADAM17,LAMA1,LAMB2,ADAM10,SPINT1,NRP2,TCIRG1,AP2M1,AP2A2,ITPR3,CTNNA1,CILP,SPRY1,LYN,TCF12,RALB,NRP1,PAK1,HRAS,HDAC1,PDGFB,EPN1,FURIN,AXL,RAP1B,PRKCD,CTNNB1,THBS1,STAT6,FLRT3,POLR2I,IGF2,POLR2D,RHOA,COL6A6,SIN3A,PCSK6,RPS6KA5,COL4A2,PTBP1,PCSK5,JUND,RAP1A,FGF2,RAC1,AP2B1,ARF6,B…	-1.60455	-0.384655	68	285
NEGATIVE REGULATION OF MULTICELLULAR ORGANISMAL PROCESS%GOBP%GO:0051241	NEGATIVE REGULATION OF MULTICELLULAR ORGANISMAL PROCESS%GOBP%GO:0051241	0.000124378	0.00533774	-1	SLC6A4,STC1,THY1,BMP10,SERPINB1,ATP1A2,LAMA4,HSPG2,ATP2B1,ARG2,ATF2,LOXL3,EFNB3,CHSY1,JUP,FGF13,ADAMTS7,FBN1,RAB11FIP1,ADAM17,SP100,LOXL2,CD9,GDF15,CYP51A1,APOA1,HEY2,DCN,FN1,SIRPA,SEMA4B,SPRY1,P2RX4,SFRP1,BST2,GTF2I,WNT11,VASN,EMILIN1,SEMA4D,VTN,PDGFB,ADAMTS9,TRAF3IP1,SEMA3C,EPN1,MAD2L2,SERPINE2,MECP2,ADAMTS1,PLCL2,FURIN,AXL,GBP1,SEMA4C,STK11,PRKCD,CTNNB1,PML,THBS1,ECM1,NPTN,FGG,KRIT1,ATP2B4,PDC…	-1.75663	-0.421113	90	285
TRANSPORT OF SMALL MOLECULES%REACTOME DATABASE ID RELEASE 77%382551	TRANSPORT OF SMALL MOLECULES%REACTOME DATABASE ID RELEASE 77%382551	0.000124517	0.00533774	-1	SLC28A3,GNG5,ASPH,SLC16A3,ADD2,CYBRD1,ATP1A2,ATP2B1,ATP1B1,ATP1A1,ERLIN2,SLC4A8,GNB4,BSG,SLC9A1,ATP1B2,FXYD1,ANO6,SLC2A3,ADD3,ADD1,ERLIN1,SLC4A7,SLC39A10,STOM,SLC2A1,ADCY9,SLC39A6,APOA1,TCIRG1,AP2M1,AP2A2,PHB,GNB1,GNAS,ATP7A,ATP11A,SLC32A1,LIPG,ANGPTL4,ABCA8,PDZD11,WNK2,ATP1B3,STOML2,GNB2,FURIN,CAMK2B,SLC1A5,SLC16A7,ATP2B4,A2M,LDLRAP1,FXYD6,HEPH,FKBP1B,SLC1A4,ABCB6,SLC20A2,PCSK6,CA2,PCSK5	-1.61255	-0.38679	62	284
WNT SIGNALING PATHWAY%PANTHER PATHWAY%P00057	WNT SIGNALING PATHWAY%PANTHER PATHWAY%P00057	0.000124626	0.00533774	-1	GNG5,GNG5,FZD6,FZD6,GNB4,GNB4,CTNNA3,CTNNA3,PCDHGB6,HELLS,HELLS,CDH1,CDH1,CDH1,ITPR1,ITPR1,ITPR1,GNAQ,GNAQ,GNAQ,ITPR3,ITPR3,CTNNA1,CTNNA1,CTNNA1,GNB1,GNB1,GNB1,PCDHB14,PCDHB14,SFRP1,SFRP1,SFRP1,SMARCD2,SMARCD2,SFRP5,SFRP5,WNT11,WNT11,WNT11,HDAC1,HDAC1,HDAC1,GNB2,GNB2,GNB2,FAT1,FAT1,PRKCD,PRKCD,CTNNB1,CTNNB1,CTNNB1,GNA14,GNA14,PCDH18,PCDH18,SMARCD1,SMARCD1,SMARCD1,ARID1A,ARID1A,GNA11,GNA11,TGFBR1,…	-1.68158	-0.404079	102	278
CELL ADHESION%GOBP%GO:0007155	CELL ADHESION%GOBP%GO:0007155	0.000125109	0.00533774	-1	DSG2,CADM1,LAMB1,THY1,ADD2,LAMC3,NID2,DSC2,CD99,COL14A1,LAMC1,PARD3B,VSTM2L,F11R,ICAM1,STXBP1,ICAM5,BSG,DSP,FOLR1,LAMB3,ATP1B2,LAMA3,CTNNA3,PCDHGB6,ITGA6,JUP,LAMA5,CD93,FBN1,CDH1,BMP7,IGFBP7,ADAM17,STXBP3,LAMB2,COL5A1,LOXL2,CD9,NRP2,FARP2,ITGB6,SRPX2,TJP1,CLDN6,CD44,DLG1,FN1,CTNNA1,SIRPA,PKP3,GNAS,NPNT,PCDHB14,PIP5K1A,CXADR,NRP1,PIP5K1C,TGFBI,EMILIN1,SEMA4D,VTN,PTK7,ADAMTS9,S1PR1,SDK2,CSRP1,FAT1,…	-1.96762	-0.474544	108	264
BIOLOGICAL ADHESION%GOBP%GO:0022610	BIOLOGICAL ADHESION%GOBP%GO:0022610	0.000125188	0.00533774	-1	DSG2,CADM1,LAMB1,THY1,ADD2,LAMC3,NID2,DSC2,CD99,COL14A1,LAMC1,PARD3B,VSTM2L,F11R,ICAM1,STXBP1,ICAM5,BSG,DSP,FOLR1,LAMB3,ATP1B2,LAMA3,CTNNA3,PCDHGB6,ITGA6,JUP,LAMA5,CD93,FBN1,CDH1,BMP7,IGFBP7,ADAM17,STXBP3,LAMB2,COL5A1,LOXL2,CD9,NRP2,FARP2,ITGB6,SRPX2,TJP1,CLDN6,CD44,DLG1,FN1,CTNNA1,SIRPA,PKP3,GNAS,NPNT,PCDHB14,PIP5K1A,CXADR,NRP1,PIP5K1C,TGFBI,EMILIN1,SEMA4D,VTN,PTK7,ADAMTS9,S1PR1,SDK2,CSRP1,FAT1,…	-1.96153	-0.472485	109	270
INTEGRIN SIGNALLING PATHWAY%PANTHER PATHWAY%P00034	INTEGRIN SIGNALLING PATHWAY%PANTHER PATHWAY%P00034	0.000125581	0.00533774	-1	NRAS,NRAS,NRAS,LAMA2,LAMA2,COL2A1,COL2A1,COL2A1,COL4A1,COL4A1,LAMB1,LAMB1,LAMC3,LAMC3,COL11A2,COL11A2,LAMA4,LAMA4,COL14A1,COL14A1,COL6A2,COL6A2,COL1A2,COL1A2,COL1A2,LAMC1,LAMC1,COL4A6,COL4A6,COL4A5,COL4A5,KRAS,KRAS,LAMC2,LAMC2,COL6A1,COL6A1,LAMB3,LAMB3,LAMA3,ITGA6,ITGA6,LAMA5,LAMA5,COL6A3,COL6A3,LAMA1,LAMA1,LAMB2,LAMB2,COL5A1,COL5A1,ITGB6,ITGB6,RAP2C,RAP2C,RAP2C,FN1,FN1,COL1A1,COL1A1	-2.08913	-0.504299	61	262
MRNA PROCESSING%GOBP%GO:0006397	MRNA PROCESSING%GOBP%GO:0006397	0.000126695	0.00533774	-1	CWF19L1,AHCYL1,PSIP1,ALKBH5,DDX41,RNPS1,RPRD1B,SRSF9,RNMT,SF1,CPSF2,PQBP1,RBM17,FIP1L1,ZCCHC8,WBP11,LSM2,SRSF4,HNRNPU,POLR2D,PNPT1,CWC15,PRPF40B,SART3,SNRPA,SCAF8,LSM4,CPSF4,DCPS,PPIE,SCAF11,HNRNPR,SON,COIL,CACTIN,PRPF8,SNRPB2,CWC27,SLBP,SNW1,LSM7,MFAP1,ISY1,CDC5L,SNRPN,ZCRB1,PRPF19,DDX46,SNRPA1,SRRM1,RBM22,RBM19,CDC73,PPWD1,HNRNPA3,WBP4,PRPF40A,SF3B6,HNRNPA0,SNRPC,SF3B2,PRPF4,PRPF31,SF3B3,SF3A2,…	-1.56901	-0.381262	142	241
ANATOMICAL STRUCTURE FORMATION INVOLVED IN MORPHOGENESIS%GOBP%GO:0048646	ANATOMICAL STRUCTURE FORMATION INVOLVED IN MORPHOGENESIS%GOBP%GO:0048646	0.000128386	0.00533774	-1	MYH6,COL4A1,LAMB1,THY1,BMP10,RECK,GPC1,EPB41L3,FBN2,NEBL,COL6A1,FOLR1,ENG,LAMB3,LAMA3,BMP7,ADAM17,EPHB2,LOXL2,TMOD1,CD9,NRP2,TCAP,PODXL,PTGFRN,HEY2,TCOF1,MYH3,FN1,BMPER,ATP7A,MBOAT7,NCL,MMP2,KDM2B,STRA6,NRP1,MMP14,TGFBI,HDAC1,VTN,PLXND1,TMOD3,S1PR1,SDK2,RNF213,CSRP1,NOLC1,SETD2,SEMA4C,CTNNB1,THBS1,TTN,MYOM2,ADAMTS15,COL4A2,ROBO2,CIB1,CTR9,FGF2,ANGPTL2,RBPJ,JAM3	-1.6403	-0.401605	63	224
PROCESSING OF CAPPED INTRON-CONTAINING PRE-MRNA%REACTOME%R-HSA-72203.3	PROCESSING OF CAPPED INTRON-CONTAINING PRE-MRNA%REACTOME%R-HSA-72203.3	0.000128436	0.00533774	-1	SYF2,NUP85,AAAS,THOC2,CHERP,RNPS1,PRCC,TPR,NUP35,NUP62,SRSF9,SF1,CPSF2,NUP153,PQBP1,NUP54,RBM17,POLR2I,FIP1L1,WBP11,THOC1,LSM2,SRSF4,HNRNPU,POLR2D,CWC15,SNRPA,THOC6,LSM4,CPSF4,PCF11,PTBP1,NUP50,PPIE,NUP155,HNRNPR,RANBP2,PRPF8,SNRPB2,U2SURP,CWC27,SRSF11,SLBP,SNW1,LSM7,RAE1,ISY1,ZC3H11A,PABPN1,CDC5L,SNRPN,ZCRB1,PRPF19,DDX46,SNRPA1,SRRM1,RBM22,CCAR1,PPWD1,HNRNPA3,WBP4,PRPF40A,SF3B6,HNRNPA0,SNRPC,SF3…	-1.81757	-0.445197	121	223
ANIMAL ORGAN MORPHOGENESIS%GOBP%GO:0009887	ANIMAL ORGAN MORPHOGENESIS%GOBP%GO:0009887	0.000131148	0.00533774	-1	MYH6,FREM1,LAMA2,COL2A1,SLC6A4,ZNF22,STC1,LAMB1,THY1,BMP10,LAMC3,FZD6,HSPG2,COL1A2,LAMC1,FBN2,LAMC2,DSP,FOLR1,ENG,LAMB3,LAMA3,ITGA6,LAMA5,FBN1,BMP7,LAMA1,LAMB2,COL5A1,EPHB2,AGRN,MFAP2,CRIP1,SLC9A3R1,NRP2,TCAP,GREM2,HEY2,DCN,COL1A1,NPNT,SPRY1,PITX3,KDM2B,STRA6,PBX3,NRP1,WNT11,HRAS,HAND2,HDAC1,NKX2-5,STX2,BMP1,ABLIM1,S1PR1,SDK2,SEMA3C,MYO6,RAB23,MYBPC3,CTNNB1,TTN,PBX2	-2.10502	-0.52073	64	202
MRNA SPLICING%REACTOME%R-HSA-72172.3	MRNA SPLICING%REACTOME%R-HSA-72172.3	0.000133032	0.00533774	-1	SYF2,CHERP,RNPS1,PRCC,SRSF9,SF1,CPSF2,PQBP1,RBM17,POLR2I,FIP1L1,WBP11,LSM2,SRSF4,HNRNPU,POLR2D,CWC15,SNRPA,LSM4,CPSF4,PCF11,PTBP1,PPIE,HNRNPR,PRPF8,SNRPB2,U2SURP,CWC27,SRSF11,SNW1,LSM7,ISY1,PABPN1,CDC5L,SNRPN,ZCRB1,PRPF19,DDX46,SNRPA1,SRRM1,RBM22,CCAR1,PPWD1,HNRNPA3,WBP4,PRPF40A,SF3B6,HNRNPA0,SNRPC,SF3B2,PRPF4,PRPF31,SF3B3,SF3A2,SNRNP40,CRNKL1,HNRNPC,CTNNBL1,LSM6,SF3B1,DHX16,HNRNPUL1,CSTF3,USP39,…	-1.65943	-0.4159	102	178
EMBRYO DEVELOPMENT%GOBP%GO:0009790	EMBRYO DEVELOPMENT%GOBP%GO:0009790	0.000133404	0.00533774	-1	MYH6,COL2A1,LAMB1,FBN2,LOXL3,KIAA1217,COL6A1,FOLR1,ENG,LAMB3,LAMA3,FBN1,BMP7,EPHB2,MFAP2,ADAM10,GREM2,HEY2,TCOF1,MYH3,FN1,COL1A1,MMP2,KDM2B,STRA6,PBX3,NASP,WNT11,MMP14,HDAC1,NKX2-5,VTN,PDGFB,CACNA1C,UGDH,MYO6,NOLC1,SETD2,SEMA4C,CTNNB1,CHRD,PBX2,ZNF281,FLRT3,IGF2,GPC3,HOXB4,FUT8,COL4A2,PCSK5,NOG,CTR9,FGF2,RBPJ	-1.75795	-0.441333	54	176
PRE-MRNA SPLICING%REACTOME%R-HSA-72163.2	PRE-MRNA SPLICING%REACTOME%R-HSA-72163.2	0.000133815	0.00533774	-1	SYF2,CHERP,RNPS1,PRCC,SRSF9,SF1,CPSF2,PQBP1,RBM17,POLR2I,FIP1L1,WBP11,LSM2,SRSF4,HNRNPU,POLR2D,CWC15,SNRPA,LSM4,CPSF4,PCF11,PTBP1,PPIE,HNRNPR,PRPF8,SNRPB2,U2SURP,CWC27,SRSF11,SNW1,LSM7,ISY1,PABPN1,CDC5L,SNRPN,PRPF19,DDX46,SNRPA1,SRRM1,RBM22,CCAR1,PPWD1,HNRNPA3,WBP4,PRPF40A,SF3B6,HNRNPA0,SNRPC,SF3B2,PRPF4,PRPF31,SF3B3,SF3A2,SNRNP40,CRNKL1,HNRNPC,CTNNBL1,LSM6,SF3B1,DHX16,HNRNPUL1,CSTF3,USP39,SF3B5,…	-1.66151	-0.417942	99	172
EXTRACELLULAR MATRIX ORGANIZATION%REACTOME DATABASE ID RELEASE 77%1474244	EXTRACELLULAR MATRIX ORGANIZATION%REACTOME DATABASE ID RELEASE 77%1474244	0.000134862	0.00533774	-1	LAMA2,COL2A1,COL4A1,LAMB1,BMP10,LAMC3,COL11A2,NID2,LAMA4,LUM,COL14A1,HSPG2,COL6A2,COL1A2,LAMC1,COL23A1,COL4A6,FMOD,PLOD2,FBN2,COL4A5,F11R,LOXL3,ICAM1,LAMC2,ICAM5,BSG,COL6A1,BGN,LAMB3,HTRA1,LAMA3,PCOLCE2,ITGA6,LAMA5,FBN1,ADAMTS3,CDH1,BMP7,COL6A3,ADAM17,LAMA1,LAMB2,COL5A1,LOXL2,AGRN,P4HA1,MFAP2,ADAM10,COL21A1,ITGB6,NID1,CAPN5,PLEC,DCN,CD44,PXDN,FN1,COL1A1,TNC,MMP2,PLOD1,VCAN,MMP14,SDC3,LTBP2,BMP1,V…	-2.64977	-0.671464	80	163
CELL-CELL ADHESION%GOBP%GO:0098609	CELL-CELL ADHESION%GOBP%GO:0098609	0.00013708	0.00533774	-1	DSG2,CADM1,LAMB1,THY1,ADD2,DSC2,CD99,COL14A1,VSTM2L,F11R,ICAM1,STXBP1,BSG,DSP,ATP1B2,LAMA3,CTNNA3,JUP,LAMA5,CD93,CDH1,BMP7,STXBP3,SRPX2,TJP1,CLDN6,CD44,DLG1,FN1,CTNNA1,PKP3,GNAS,NPNT,PCDHB14,CXADR,PIP5K1C,SEMA4D,SDK2,CSRP1,FAT1,LRRC4B,CTNNB1,NPTN,FGG,PTPRF,FLRT3,ALCAM,ADAM9,ROBO2,JAM3,PKP4,RAP2B,S100A8,PLEKHA7,GPC4,ARVCF,FIBP,CELSR2,FGFRL1,ATP2C1,CAMSAP3,PSEN1,GOLPH3,ACTB,CTNND1,PKP2	-2.11365	-0.541565	66	149
CATION TRANSPORT%GOBP%GO:0006812	CATION TRANSPORT%GOBP%GO:0006812	0.000137193	0.00533774	-1	SLC6A4,CYBRD1,ATP1A2,CACNB2,ATP2B1,ATP1B1,ATP1A1,SLC4A8,SLC9A1,ATP1B2,ANO6,FGF13,ITPR1,SLC39A10,SFXN3,SLC39A6,CACNB3,ITPR3,ATP7A,P2RX4,CHERP,LMTK2,CACNA1C,ATP1B3,STOML2,KCNJ8,ATP2B4,KCNQ1,HEPH,RALBP1,SLC1A4,SLC25A23,ABCB6,CACNA2D1,FGF2,PIEZO1,JPH1,GAS6,ATP6V1A,CNNM4,CHP1,CAV1,SLC39A11,PDZK1,SNAP23,MMGT1,SLC1A3,TFRC	-1.75513	-0.450551	48	146
NEURONAL SYSTEM%REACTOME%R-HSA-112316.7	NEURONAL SYSTEM%REACTOME%R-HSA-112316.7	0.000140469	0.00533774	-1	GNG5,COMT,NRAS,SLC6A4,CACNB2,EPB41L1,EPB41L3,AKAP5,KCNAB2,STXBP1,GNB4,EPB41L2,LIN7C,EPB41,FLOT2,CACNA2D3,ADCY9,GNAI3,CACNB3,DLG1,GNB1,SLC32A1,MAOA,GNAI2,HRAS,GLS,SNAP25,GNB2,FLOT1,MYO6,LRRC4B,CAMK2B,EPB41L5,GABBR1,NPTN,KCNJ8,KCNQ1,PTPRF	-1.82503	-0.475704	38	130
EXPORT FROM CELL%GOBP%GO:0140352	EXPORT FROM CELL%GOBP%GO:0140352	0.000140528	0.00533774	-1	VAMP8,ATP1A2,ATP2B1,ATP1B1,RAB27A,ATP1A1,STXBP2,STXBP1,SLC9A1,ATP1B2,TANGO2,LIN7C,EXOC3L2,RAB11FIP1,STXBP3,RCN3,STX1B,STX3,RAB13,SDF4,STX17,LYN,SLC32A1,PIK3C2A,PIP5K1C,PDZD11,LTBP2,STX2,PREB,SNAP25,ATP1B3,LTBP4,FURIN,RAB8B,FGG,KCNQ1,RALBP1,TMED10,RAB10,PCSK6,PCSK5,VAMP7,MIA2,PDZK1,SNAP23,STX4,LIN7A,RAB8A,PDIA4,PCLO,SYT7	-1.87075	-0.488337	51	128
DISEASES OF METABOLISM%REACTOME%R-HSA-5668914.4	DISEASES OF METABOLISM%REACTOME%R-HSA-5668914.4	0.000141263	0.00533774	-1	CHST6,LUM,CHST14,HSPG2,GPC1,ADAMTSL4,FMOD,PRELP,CHSY1,BGN,MAT1A,CYP27A1,ADAMTS7,ADAMTS3,ADAMTSL1,AGRN,ADAMTS6,FDX1,THSD4,CSPG4,DCN,ALG2,B4GALT1,MAOA,ADAMTS19,VCAN,SDC3,ADAMTS9,ADAMTS1,GALK1,PAPSS2,THBS1,NOTCH3,ADAMTS14,B4GAT1,GPC3,ADAMTS15	-1.92679	-0.507101	37	120
PROTEIN LOCALIZATION TO CELL PERIPHERY%GOBP%GO:1990778	PROTEIN LOCALIZATION TO CELL PERIPHERY%GOBP%GO:1990778	0.000141263	0.00533774	-1	CACNB2,TESC,ATP1B1,EPB41L3,F11R,STXBP1,BSG,LIN7C,JUP,FGF13,EHD2,TTC7B,CDH1,FLOT2,STX1B,STX3,RAB13,SLC9A3R1,CACNB3,DLG1,TSPAN15,PKP3,ANK3,PIP5K1A,PDZD11,EFR3A,ATP1B3,FLOT1,RAB8B,KRT18,MAP7,RAB10,VAMP5,S100A10,RDX,RAP1A,RAPGEF6,GAS6,CAV1,PDZK1,LIN7A,RAB8A,ITGB1BP1,INPP5K	-1.76528	-0.464594	44	120
VASCULATURE DEVELOPMENT%GOBP%GO:0001944	VASCULATURE DEVELOPMENT%GOBP%GO:0001944	0.000141623	0.00533774	-1	COL4A1,LGALS8,THY1,RECK,COL1A2,FOLR1,ENG,EGFL7,LAMA1,EPHB2,LOXL2,LRP1,NRP2,HEY2,COL1A1,BMPER,ATP7A,NCL,STRA6,NRP1,TGFBI,NKX2-5,CFC1,PLXND1,PDGFB,ADAMTS9,S1PR1,RNF213,STK11,CTNNB1,THBS1,GPC3,ROBO2,NOG,FGF2,ANGPTL2,RBPJ,JAM3,SERPINE1,AMOTL1,CAV1,TGFBR1	-1.78391	-0.469982	42	119
METAL ION TRANSPORT%GOBP%GO:0030001	METAL ION TRANSPORT%GOBP%GO:0030001	0.000142227	0.00533774	-1	SLC6A4,CYBRD1,ATP1A2,CACNB2,ATP2B1,ATP1B1,ATP1A1,SLC4A8,SLC9A1,ATP1B2,ANO6,FGF13,ITPR1,SLC39A10,SLC39A6,CACNB3,ITPR3,ATP7A,P2RX4,CHERP,LMTK2,CACNA1C,ATP1B3,STOML2,KCNJ8,ATP2B4,KCNQ1,HEPH,SLC25A23,ABCB6,CACNA2D1,FGF2,JPH1,GAS6,CNNM4,CHP1,CAV1,SLC39A11,MMGT1,SLC1A3,TFRC	-1.80829	-0.478052	41	116
ALZHEIMER DISEASE-PRESENILIN PATHWAY%PANTHER PATHWAY%P00004	ALZHEIMER DISEASE-PRESENILIN PATHWAY%PANTHER PATHWAY%P00004	0.000142572	0.00533774	-1	FZD6,FZD6,JUP,JUP,CDH1,CDH1,CDH1,ADAM17,ADAM17,LRP1,LRP1,CD44,CD44,MMP2,MMP2,WNT11,WNT11,WNT11,MMP14,MMP14,FURIN,FURIN,CTNNB1,CTNNB1,CTNNB1,NOTCH3,NOTCH3,PCSK6,PCSK6,PCSK5,RBPJ,RBPJ,TCF7L1,TCF7L1,TCF7L1,WNT5B,WNT5B,WNT5B,PSEN1,PSEN1,PSEN1,ACTB,ACTB,ACTB	-1.87025	-0.49692	44	112
SUMOYLATION%REACTOME DATABASE ID RELEASE 77%2990846	SUMOYLATION%REACTOME DATABASE ID RELEASE 77%2990846	0.000142653	0.00533774	-1	SP100,PARP1,MDC1,NUP85,AAAS,HDAC1,TPR,CBX8,NUP35,NUP62,CBX5,TP53BP1,PML,CDCA8,NUP153,NUP54,BIRC5,RXRA,ING2,SIN3A,SMC1A,TRIM27,NSMCE4A,STAG2,NUP50,SP3,SMC6,UHRF2,NCOA1,NUP155,RANBP2,SUZ12,RAE1,BMI1,XPC,PHC2,SENP1,ZBED1,NSMCE2,TOP2A,UBA2,EP300,SMC5,TP53,WRN,NUP88,HNRNPC,TOP1,RING1,SAFB,SUMO2,NOP58,MTA1,NUP160,RPA1,RAD21,SAE1,NUP210,NUP107,SUMO1,NDC1,SMC3,TOP2B,NFKB2	-1.81182	-0.480027	64	115
SUMO E3 LIGASES SUMOYLATE TARGET PROTEINS%REACTOME%R-HSA-3108232.5	SUMO E3 LIGASES SUMOYLATE TARGET PROTEINS%REACTOME%R-HSA-3108232.5	0.000143062	0.00533774	-1	SP100,PARP1,MDC1,NUP85,AAAS,HDAC1,TPR,CBX8,NUP35,NUP62,CBX5,TP53BP1,PML,CDCA8,NUP153,NUP54,BIRC5,RXRA,ING2,SIN3A,SMC1A,TRIM27,NSMCE4A,STAG2,NUP50,SP3,SMC6,UHRF2,NCOA1,NUP155,RANBP2,SUZ12,RAE1,BMI1,XPC,PHC2,ZBED1,NSMCE2,TOP2A,EP300,SMC5,TP53,WRN,NUP88,HNRNPC,TOP1,RING1,SAFB,SUMO2,NOP58,MTA1,NUP160,RPA1,RAD21,NUP210,NUP107,SUMO1,NDC1,SMC3,TOP2B,NFKB2	-1.79275	-0.477037	61	111
PROTEIN LOCALIZATION TO PLASMA MEMBRANE%GOBP%GO:0072659	PROTEIN LOCALIZATION TO PLASMA MEMBRANE%GOBP%GO:0072659	0.000143266	0.00533774	-1	CACNB2,TESC,ATP1B1,EPB41L3,F11R,STXBP1,BSG,JUP,FGF13,EHD2,TTC7B,CDH1,FLOT2,RAB13,SLC9A3R1,CACNB3,DLG1,TSPAN15,PKP3,ANK3,PIP5K1A,EFR3A,ATP1B3,FLOT1,RAB8B,KRT18,MAP7,RAB10,VAMP5,S100A10,RDX,RAP1A,RAPGEF6,GAS6,PDZK1,RAB8A,ITGB1BP1,INPP5K	-1.71772	-0.458258	38	109
HETEROTRIMERIC G-PROTEIN SIGNALING PATHWAY-GI ALPHA AND GS ALPHA MEDIATED PATHWAY%PANTHER PATHWAY%P00026	HETEROTRIMERIC G-PROTEIN SIGNALING PATHWAY-GI ALPHA AND GS ALPHA MEDIATED PATHWAY%PANTHER PATHWAY%P00026	0.000143947	0.00533774	-1	GNG5,GNG5,ADRA2B,ADRA2B,ADRA2B,GRK5,GRK5,ADCY9,ADCY9,GNAI3,GNAI3,GNAI3,GNB1,GNB1,GNB1,PYGL,PYGL,GNAI2,GNAI2,GNB2,GNB2,GNB2,CREM,CREM,PYGM,PYGM,RGS19,RGS19,RAP1B,RAP1B,RAP1B	-2.10838	-0.565459	31	105
NICOTINIC ACETYLCHOLINE RECEPTOR SIGNALING PATHWAY%PANTHER PATHWAY%P00044	NICOTINIC ACETYLCHOLINE RECEPTOR SIGNALING PATHWAY%PANTHER PATHWAY%P00044	0.00014537	0.00533774	-1	MYH6,MYH6,MYH6,VAMP8,VAMP8,VAMP8,STX1B,STX1B,STX3,STX3,MYO1C,MYO1C,MYH8,MYH8,MYH3,MYH3,MYO1D,MYO1D,STX2,STX2,MYO1B,MYO1B,MYO1B,SNAP25,SNAP25,MYO6,MYO6	-1.85472	-0.500442	27	101
HALLMARK_GLYCOLYSIS%MSIGDB_C2%HALLMARK_GLYCOLYSIS	HALLMARK_GLYCOLYSIS%MSIGDB_C2%HALLMARK_GLYCOLYSIS	0.000145497	0.00533774	-1	CHST6,SLC16A3,STC1,DSC2,GPC1,PLOD2,HK2,ENO2,AK4,AGRN,P4HA1,TPST1,CAPN5,DCN,PDK3,ZNF292,CD44,B4GALT1,PLOD1,VCAN,PYGL,NASP,ANGPTL4,SDC3,TGFBI,STC2,CHST12,PGM2,ANKZF1,GPC3,FUT8,ABCB6	-2.01269	-0.543734	32	100
INORGANIC ION TRANSMEMBRANE TRANSPORT%GOBP%GO:0098660	INORGANIC ION TRANSMEMBRANE TRANSPORT%GOBP%GO:0098660	0.000146007	0.00533774	-1	SLC6A4,ATP1A2,ATP2B1,ATP1B1,ATP1A1,SLC4A8,SLC9A1,ATP1B2,ANO6,ITPR1,SLC39A10,SLC39A6,CACNB3,ITPR3,ATP7A,P2RX4,CHERP,CACNA1C,ATP1B3,STOML2,KCNJ8,ATP2B4,KCNQ1,SLC25A23,ABCB6,SLC20A2,CACNA2D1,FGF2,GAS6,ATP6V1A,SLC39A11	-1.83551	-0.499569	31	95
CATION TRANSMEMBRANE TRANSPORT%GOBP%GO:0098655	CATION TRANSMEMBRANE TRANSPORT%GOBP%GO:0098655	0.000146071	0.00533774	-1	SLC6A4,ATP1A2,ATP2B1,ATP1B1,ATP1A1,SLC4A8,SLC9A1,ATP1B2,ANO6,ITPR1,SLC39A10,SFXN3,SLC39A6,CACNB3,ITPR3,ATP7A,P2RX4,CHERP,CACNA1C,ATP1B3,STOML2,KCNJ8,ATP2B4,KCNQ1,SLC1A4,SLC25A23,ABCB6,CACNA2D1,FGF2,GAS6,ATP6V1A,SLC39A11	-1.82818	-0.496299	32	97
SKELETAL SYSTEM DEVELOPMENT%GOBP%GO:0001501	SKELETAL SYSTEM DEVELOPMENT%GOBP%GO:0001501	0.000147319	0.00533774	-1	FREM1,COL2A1,STC1,COL11A2,COL1A2,PRELP,FBN2,KIAA1217,FBN1,BMP7,ZNF385A,TCOF1,CD44,COL1A1,GNAS,ATP7A,VCAN,WNT11,MMP14,SEMA4D,BMP1,HAPLN1,RAB23,CTNNB1,PAPSS2,CHRD,IGF2,HOXB4,RHOA,PCSK5,NOG,FGF2,ALPL,SRC,HAPLN3,TGFBR1,PAPSS1,CER1,SH3PXD2B,ANXA2,TGM2,WNT5B	-2.04357	-0.562414	42	89
HALLMARK_EPITHELIAL_MESENCHYMAL_TRANSITION%MSIGDB_C2%HALLMARK_EPITHELIAL_MESENCHYMAL_TRANSITION	HALLMARK_EPITHELIAL_MESENCHYMAL_TRANSITION%MSIGDB_C2%HALLMARK_EPITHELIAL_MESENCHYMAL_TRANSITION	0.000147514	0.00533774	-1	COL4A1,CADM1,THY1,NID2,GPC1,COL1A2,LAMC1,PLOD2,FBN2,LAMC2,GPX7,HTRA1,ENO2,LAMA3,PCOLCE2,FBN1,PLAUR,LAMA1,LOXL2,DCN,CD44,COL1A1,TNC,MMP2,SFRP1,PLOD1,VCAN,MMP14,TGFBI,BMP1,CYR61,JUN,CD59,SERPINE2,PCOLCE,THBS1,PDLIM4,TFPI2,TIMP3,COL4A2,FGF2	-2.30808	-0.637001	41	87
INORGANIC CATION TRANSMEMBRANE TRANSPORT%GOBP%GO:0098662	INORGANIC CATION TRANSMEMBRANE TRANSPORT%GOBP%GO:0098662	0.000148258	0.00533774	-1	SLC6A4,ATP1A2,ATP2B1,ATP1B1,ATP1A1,SLC4A8,SLC9A1,ATP1B2,ANO6,ITPR1,SLC39A10,SLC39A6,CACNB3,ITPR3,ATP7A,P2RX4,CHERP,CACNA1C,ATP1B3,STOML2,KCNJ8,ATP2B4,KCNQ1,SLC25A23,ABCB6,CACNA2D1,FGF2,GAS6,ATP6V1A,SLC39A11	-1.90931	-0.52893	30	85
HETEROTRIMERIC G-PROTEIN SIGNALING PATHWAY-GQ ALPHA AND GO ALPHA MEDIATED PATHWAY%PANTHER PATHWAY%P00027	HETEROTRIMERIC G-PROTEIN SIGNALING PATHWAY-GQ ALPHA AND GO ALPHA MEDIATED PATHWAY%PANTHER PATHWAY%P00027	0.000149813	0.00533774	-1	GNG5,GNG5,GRK5,GRK5,GNB4,GNB4,ITPR1,ITPR1,GNAQ,GNAQ,GNAQ,ITPR3,ITPR3,GNB1,GNB1,GNB1,GNB2,GNB2,GNB2,RGS19,RGS19,RAP1B,RAP1B,RAP1B,PRKCD,PRKCD,GNA14,GNA14,RHOA,RHOA,RAP1A,RAP1A,GNA11,GNA11	-2.26131	-0.636113	34	77
DISEASES OF GLYCOSYLATION%REACTOME DATABASE ID RELEASE 77%3781865	DISEASES OF GLYCOSYLATION%REACTOME DATABASE ID RELEASE 77%3781865	0.000149813	0.00533774	-1	CHST6,LUM,CHST14,HSPG2,GPC1,ADAMTSL4,FMOD,PRELP,CHSY1,BGN,ADAMTS7,ADAMTS3,ADAMTSL1,AGRN,ADAMTS6,THSD4,CSPG4,DCN,ALG2,B4GALT1,ADAMTS19,VCAN,SDC3,ADAMTS9,ADAMTS1,GALK1,PAPSS2,THBS1,NOTCH3,ADAMTS14,B4GAT1,GPC3,ADAMTS15	-2.1978	-0.618248	33	77
THYROTROPIN-RELEASING HORMONE RECEPTOR SIGNALING PATHWAY%PANTHER PATHWAY%P04394	THYROTROPIN-RELEASING HORMONE RECEPTOR SIGNALING PATHWAY%PANTHER PATHWAY%P04394	0.000150015	0.00533774	-1	GNG5,GNG5,GNG5,TRH,TRH,VAMP8,VAMP8,VAMP8,PLCD1,PLCD1,CACNB2,CACNB2,GNB4,GNB4,GNAQ,GNAQ,GNAQ,STX3,STX3,CACNB3,CACNB3,GNB1,GNB1,GNB1,SNAP25,SNAP25,GNB2,GNB2,GNB2,PLCL2,PLCL2,PRKCD,PRKCD,GNA14,GNA14	-2.44145	-0.68847	35	76
EXTRACELLULAR STRUCTURE ORGANIZATION%GOBP%GO:0043062	EXTRACELLULAR STRUCTURE ORGANIZATION%GOBP%GO:0043062	0.000150716	0.00533774	-1	COL2A1,COL4A1,LAMB1,RECK,COL11A2,NID2,LUM,COL14A1,COL1A2,LAMC1,COL23A1,COL4A6,COL4A5,LOXL3,LAMB3,ADAMTS7,ADAMTS3,LAMB2,COL5A1,LOXL2,ADAMTS6,ADAM10,CAPG,NID1,PXDN,COL1A1,NPNT,ATP7A,MMP2,ADAMTS19,MMP14,TGFBI,EMILIN1,BMP1,ADAMTS9,FLOT1,ADAMTS1,FURIN,PLOD3,ADAMTS14,ADAMTS15,COL4A2,GAS6,LOXL4,ADAMTS12,TGFBR1,MFAP4	-2.50419	-0.707628	47	75
EXTERNAL ENCAPSULATING STRUCTURE ORGANIZATION%GOBP%GO:0045229	EXTERNAL ENCAPSULATING STRUCTURE ORGANIZATION%GOBP%GO:0045229	0.000150716	0.00533774	-1	COL2A1,COL4A1,LAMB1,RECK,COL11A2,NID2,LUM,COL14A1,COL1A2,LAMC1,COL23A1,COL4A6,COL4A5,LOXL3,LAMB3,ADAMTS7,ADAMTS3,LAMB2,COL5A1,LOXL2,ADAMTS6,ADAM10,CAPG,NID1,PXDN,COL1A1,NPNT,ATP7A,MMP2,ADAMTS19,MMP14,TGFBI,EMILIN1,BMP1,ADAMTS9,FLOT1,ADAMTS1,FURIN,PLOD3,ADAMTS14,ADAMTS15,COL4A2,GAS6,LOXL4,ADAMTS12,TGFBR1,MFAP4	-2.50419	-0.707628	47	75
EXTRACELLULAR MATRIX ORGANIZATION%GOBP%GO:0030198	EXTRACELLULAR MATRIX ORGANIZATION%GOBP%GO:0030198	0.000150716	0.00533774	-1	COL2A1,COL4A1,LAMB1,RECK,COL11A2,NID2,LUM,COL14A1,COL1A2,LAMC1,COL23A1,COL4A6,COL4A5,LOXL3,LAMB3,ADAMTS7,ADAMTS3,LAMB2,COL5A1,LOXL2,ADAMTS6,ADAM10,CAPG,NID1,PXDN,COL1A1,NPNT,ATP7A,MMP2,ADAMTS19,MMP14,TGFBI,EMILIN1,BMP1,ADAMTS9,FLOT1,ADAMTS1,FURIN,PLOD3,ADAMTS14,ADAMTS15,COL4A2,GAS6,LOXL4,ADAMTS12,TGFBR1,MFAP4	-2.50419	-0.707628	47	75
PNAT%PANTHER PATHWAY%P05912	PNAT%PANTHER PATHWAY%P05912	0.000151217	0.00533774	-1	COMT,COMT,VAMP8,VAMP8,VAMP8,EPB41L1,EPB41L1,GNAZ,GNAZ,EPB41L3,GNB4,GNB4,EPB41L2,EPB41,EPB41,STX3,STX3,GNAI3,GNAI3,GNAI3,GNB1,GNB1,GNB1,MAOA,MAOA,GNAI2,GNAI2,SNAP25,SNAP25,GNB2,GNB2,GNB2,PPP1R1B,PPP1R1B	-2.67263	-0.764607	34	69
OXYTOCIN RECEPTOR MEDIATED SIGNALING PATHWAY%PANTHER PATHWAY%P04391	OXYTOCIN RECEPTOR MEDIATED SIGNALING PATHWAY%PANTHER PATHWAY%P04391	0.000151584	0.00533774	-1	GNG5,GNG5,GNG5,VAMP8,VAMP8,VAMP8,PLCD1,PLCD1,GNB4,GNB4,GNAQ,GNAQ,GNAQ,STX3,STX3,GNB1,GNB1,GNB1,SNAP25,SNAP25,GNB2,GNB2,GNB2,PLCL2,PLCL2,PRKCD,PRKCD,GNA14,GNA14	-2.29728	-0.658597	29	68
MUSCARINIC ACETYLCHOLINE RECEPTOR 2 AND 4 SIGNALING PATHWAY%PANTHER PATHWAY%P00043	MUSCARINIC ACETYLCHOLINE RECEPTOR 2 AND 4 SIGNALING PATHWAY%PANTHER PATHWAY%P00043	0.000151906	0.00533774	-1	GNG5,GNG5,GNG5,VAMP8,VAMP8,VAMP8,GNB4,GNB4,STX1B,STX1B,STX3,STX3,GNAI3,GNAI3,GNAI3,GNB1,GNB1,GNB1,GNAI2,GNAI2,STX2,STX2,SNAP25,SNAP25,GNB2,GNB2,GNB2	-2.37325	-0.681658	27	67
TRANSPORT OF MATURE MRNA DERIVED FROM AN INTRON-CONTAINING TRANSCRIPT%REACTOME%R-HSA-159236.3	TRANSPORT OF MATURE MRNA DERIVED FROM AN INTRON-CONTAINING TRANSCRIPT%REACTOME%R-HSA-159236.3	0.000153468	0.00533774	-1	NUP85,AAAS,THOC2,RNPS1,TPR,NUP35,NUP62,SRSF9,NUP153,NUP54,THOC1,SRSF4,THOC6,NUP50,NUP155,RANBP2,SRSF11,RAE1,ZC3H11A,SRRM1,NUP88,SARNP,THOC5,NUP160,NCBP1,NCBP2,SRSF1,GLE1,NUP210,NUP107,SRSF5,NDC1,DDX39A	-1.90334	-0.551449	33	64
GLYCOSAMINOGLYCAN METABOLISM%REACTOME%R-HSA-1630316.2	GLYCOSAMINOGLYCAN METABOLISM%REACTOME%R-HSA-1630316.2	0.000154083	0.00533774	-1	CHST6,LUM,CHST14,HSPG2,GPC1,FMOD,PRELP,SLC9A1,CHSY1,BGN,B4GALT4,AGRN,CSPG4,DCN,CD44,B4GALT1,ST3GAL4,HS3ST3B1,VCAN,SDC3,PAPSS2,B4GAT1,CHST12,HS3ST1,GPC3	-1.98505	-0.576928	25	63
MUSCARINIC ACETYLCHOLINE RECEPTOR 1 AND 3 SIGNALING PATHWAY%PANTHER PATHWAY%P00042	MUSCARINIC ACETYLCHOLINE RECEPTOR 1 AND 3 SIGNALING PATHWAY%PANTHER PATHWAY%P00042	0.000154679	0.00533774	-1	GNG5,GNG5,GNG5,PCK2,VAMP8,VAMP8,VAMP8,GNB4,GNB4,ITPR1,ITPR1,ITPR1,GNAQ,GNAQ,GNAQ,STX1B,STX1B,STX1B,ITPR3,ITPR3,GNB1,GNB1,GNB1,SNAP25,SNAP25,GNB2,GNB2,GNB2,PRKCD,PRKCD,GNA14,GNA14	-2.49614	-0.731185	32	60
INTEGRATION OF ENERGY METABOLISM%REACTOME%R-HSA-163685.1	INTEGRATION OF ENERGY METABOLISM%REACTOME%R-HSA-163685.1	0.000154871	0.00533774	-1	GNG5,AHCYL1,CACNB2,AKAP5,STXBP1,GNB4,ITPR1,GNAQ,SLC2A1,ADCY9,CACNB3,ITPR3,GNB1,GNAS,IQGAP1,ACSL3,GNAI2,SNAP25,MARCKS,CACNA1C,GNB2,STK11,GNA14,RAP1A,CACNA2D2,GNA11,CD36,ACSL4,GNAI1,PRKAR2A,INS,PPP2R1B,KCNJ11,TKT	-2.20329	-0.64717	34	59
POTENTIAL THERAPEUTICS FOR SARS%REACTOME DATABASE ID RELEASE 77%9679191	POTENTIAL THERAPEUTICS FOR SARS%REACTOME DATABASE ID RELEASE 77%9679191	0.000155063	0.00533774	-1	COMT,ATP1A2,ATP1B1,ATP1A1,BRD4,ATP1B2,FXYD1,AP2M1,AP2A2,PHF21A,HDAC1,ATP1B3,S1PR1,FURIN,ARID4B,FXYD6,JAK1,AP2B1,PTGES3,RCOR1,KDM1A,TYK2,GATAD2A,MTA3,SUDS3	-1.90616	-0.561793	25	58
SUMOYLATION OF DNA DAMAGE RESPONSE AND REPAIR PROTEINS%REACTOME DATABASE ID RELEASE 77%3108214	SUMOYLATION OF DNA DAMAGE RESPONSE AND REPAIR PROTEINS%REACTOME DATABASE ID RELEASE 77%3108214	0.000155063	0.00533774	-1	SP100,PARP1,MDC1,NUP85,AAAS,TPR,CBX8,NUP35,NUP62,PML,NUP153,NUP54,SMC1A,NSMCE4A,STAG2,NUP50,SMC6,NUP155,RANBP2,RAE1,BMI1,XPC,PHC2,NSMCE2,SMC5,WRN,NUP88,RING1,SUMO2,NUP160,RPA1,RAD21,NUP210,NUP107,SUMO1,NDC1,SMC3	-1.95497	-0.576178	37	58
REGULATION OF LEUKOCYTE MIGRATION%GOBP%GO:0002685	REGULATION OF LEUKOCYTE MIGRATION%GOBP%GO:0002685	0.000155063	0.00533774	-1	MOSPD2,MTUS1,THY1,CD99,ICAM1,ANO6,ADAM17,ADAM10,MPP1,ST3GAL4,LYN,P2RX4,EMILIN1,STK10,THBS1,RHOA,RHOG,RAC1,JAM3,SERPINE1,GAS6	-1.93563	-0.570478	21	58
REGULATION OF IGF ACTIVITY BY IGFBP%REACTOME%R-HSA-381426.2	REGULATION OF IGF ACTIVITY BY IGFBP%REACTOME%R-HSA-381426.2	0.000155812	0.00533774	-1	LAMB1,LAMC1,LGALS1,FBN1,IGFBP7,LAMB2,ADAM10,WFS1,APOA1,VWA1,FN1,TNC,MMP2,VCAN,CKAP4,PDIA6,PRSS23,SERPINA1,NUCB1,IGFBP5,STC2,FGG,ITIH2,IGF2,GPC3,HRC,HSP90B1,TMEM132A,MFGE8,GAS6,IGFBP3,TGOLN2,DNAJC3,LTBP1,PRKCSH,QSOX1,CDH2,TIMP1,RCN1,CALU	-2.23303	-0.661024	40	57
REGULATION OF NEUROTRANSMITTER LEVELS%GOBP%GO:0001505	REGULATION OF NEUROTRANSMITTER LEVELS%GOBP%GO:0001505	0.000156912	0.00533774	-1	MOXD1,SLC6A4,ATP1A2,STXBP2,STXBP1,SLC4A8,LIN7C,STXBP3,STX1B,STX3,SLC32A1,PIP5K1C,PDZD11,STX2,SNAP25,FLOT1,RAP1B,GCHFR,RAP1A,SNAP23,STX4,LIN7A,SLC1A3,PCLO,SYT7	-1.88167	-0.560008	25	56
HISTAMINE H1 RECEPTOR MEDIATED SIGNALING PATHWAY%PANTHER PATHWAY%P04385	HISTAMINE H1 RECEPTOR MEDIATED SIGNALING PATHWAY%PANTHER PATHWAY%P04385	0.000157555	0.00533774	-1	GNG5,GNG5,GNG5,PLCD1,PLCD1,GNB4,GNB4,ITPR1,ITPR1,ITPR1,GNAQ,GNAQ,GNAQ,ITPR3,ITPR3,GNB1,GNB1,GNB1,GNB2,GNB2,GNB2,PLCL2,PLCL2,PRKCD,PRKCD,GNA14,GNA14	-2.24621	-0.671287	27	55
POST-TRANSLATIONAL PROTEIN PHOSPHORYLATION%REACTOME DATABASE ID RELEASE 77%8957275	POST-TRANSLATIONAL PROTEIN PHOSPHORYLATION%REACTOME DATABASE ID RELEASE 77%8957275	0.000157555	0.00533774	-1	LAMB1,LAMC1,LGALS1,FBN1,IGFBP7,LAMB2,ADAM10,WFS1,APOA1,VWA1,FN1,TNC,VCAN,CKAP4,PDIA6,PRSS23,SERPINA1,NUCB1,IGFBP5,STC2,FGG,ITIH2,GPC3,HRC,HSP90B1,TMEM132A,MFGE8,GAS6,IGFBP3,TGOLN2,DNAJC3,LTBP1,PRKCSH,QSOX1,CDH2,TIMP1,RCN1,CALU	-2.19658	-0.656456	38	55
SIGNALING BY MET%REACTOME%R-HSA-6806834.2	SIGNALING BY MET%REACTOME%R-HSA-6806834.2	0.000157555	0.00533774	-1	NRAS,LAMA2,LAMB1,LAMC3,LAMA4,LAMC1,LAMC2,LAMB3,LAMA3,LAMA5,LAMA1,LAMB2,SPINT1	-1.87394	-0.560033	13	55
5HT2 TYPE RECEPTOR MEDIATED SIGNALING PATHWAY%PANTHER PATHWAY%P04374	5HT2 TYPE RECEPTOR MEDIATED SIGNALING PATHWAY%PANTHER PATHWAY%P04374	0.000157604	0.00533774	-1	GNG5,GNG5,GNG5,SLC6A4,SLC6A4,PLCD1,PLCD1,GNB4,GNB4,GNAQ,GNAQ,GNAQ,GNB1,GNB1,GNB1,GNB2,GNB2,GNB2,PLCL2,PLCL2,PRKCD,PRKCD,GNA14,GNA14	-2.19981	-0.660347	24	53
METABOTROPIC GLUTAMATE RECEPTOR GROUP III PATHWAY%PANTHER PATHWAY%P00039	METABOTROPIC GLUTAMATE RECEPTOR GROUP III PATHWAY%PANTHER PATHWAY%P00039	0.000157604	0.00533774	-1	GNG5,GNG5,GNG5,VAMP8,VAMP8,GNB4,GNB4,STX1B,STX1B,STX1B,GNAI3,GNAI3,GNB1,GNB1,GNB1,GNAI2,GNAI2,SNAP25,SNAP25,GNB2,GNB2,GNB2	-2.3081	-0.692855	22	53
METABOTROPIC GLUTAMATE RECEPTOR GROUP II PATHWAY%PANTHER PATHWAY%P00040	METABOTROPIC GLUTAMATE RECEPTOR GROUP II PATHWAY%PANTHER PATHWAY%P00040	0.000157604	0.00533774	-1	GNG5,GNG5,GNG5,VAMP8,VAMP8,VAMP8,GNB4,GNB4,STX1B,STX1B,STX1B,GNAI3,GNAI3,GNAI3,GNB1,GNB1,GNB1,GNAI2,GNAI2,SNAP25,SNAP25,GNB2,GNB2,GNB2	-2.42839	-0.728966	24	53
CELL SURFACE INTERACTIONS AT THE VASCULAR WALL%REACTOME%R-HSA-202733.5	CELL SURFACE INTERACTIONS AT THE VASCULAR WALL%REACTOME%R-HSA-202733.5	0.000157604	0.00533774	-1	NRAS,SLC16A3,CD99,GPC1,ATP1B1,YES1,F11R,BSG,ATP1B2,ITGA6,CD99L2,CD44,FN1,SIRPA,LYN,CXADR,EPCAM,SDC3,HRAS,ATP1B3	-2.0452	-0.613938	20	53
DEGRADATION OF THE EXTRACELLULAR MATRIX%REACTOME%R-HSA-1474228.4	DEGRADATION OF THE EXTRACELLULAR MATRIX%REACTOME%R-HSA-1474228.4	0.000157629	0.00533774	-1	LAMB1,COL14A1,HSPG2,LAMC1,COL23A1,LAMC2,BSG,LAMB3,HTRA1,LAMA3,LAMA5,CDH1,ADAM17,ADAM10,NID1,CAPN5,DCN,CD44,MMP2,MMP14,BMP1,ADAMTS9,ADAMTS1,FURIN,A2M,COL26A1	-2.15471	-0.650343	26	51
COLLAGEN FORMATION%REACTOME DATABASE ID RELEASE 77%1474290	COLLAGEN FORMATION%REACTOME DATABASE ID RELEASE 77%1474290	0.000157629	0.00533774	-1	COL2A1,COL4A1,COL11A2,COL14A1,COL6A2,COL1A2,COL23A1,COL4A6,PLOD2,COL4A5,LOXL3,LAMC2,COL6A1,LAMB3,LAMA3,PCOLCE2,ITGA6,ADAMTS3,COL6A3,COL5A1,LOXL2,P4HA1,COL21A1,PLEC,PXDN,COL1A1,PLOD1,BMP1,PCOLCE,PLOD3,ADAMTS14,COL26A1,COL6A6,COL4A2	-2.51425	-0.75886	34	51
5HT1 TYPE RECEPTOR MEDIATED SIGNALING PATHWAY%PANTHER PATHWAY%P04373	5HT1 TYPE RECEPTOR MEDIATED SIGNALING PATHWAY%PANTHER PATHWAY%P04373	0.000157803	0.00533774	-1	GNG5,GNG5,GNG5,SLC6A4,SLC6A4,GNB4,GNB4,STX3,STX3,GNAI3,GNAI3,GNAI3,GNB1,GNB1,GNB1,GNAI2,GNAI2,SNAP25,SNAP25,GNB2,GNB2,GNB2	-2.49466	-0.756898	22	49
CELL-CELL ADHESION VIA PLASMA-MEMBRANE ADHESION MOLECULES%GOBP%GO:0098742	CELL-CELL ADHESION VIA PLASMA-MEMBRANE ADHESION MOLECULES%GOBP%GO:0098742	0.000157803	0.00533774	-1	DSG2,CADM1,VSTM2L,ICAM1,BSG,CDH1,CLDN6,PCDHB14,CXADR,SDK2,LRRC4B,NPTN,PTPRF,FLRT3,ALCAM,ROBO2,GPC4,CELSR2,FGFRL1,ATP2C1	-1.90454	-0.573468	20	52
PHAGOCYTOSIS%GOBP%GO:0006909	PHAGOCYTOSIS%GOBP%GO:0006909	0.000157803	0.00533774	-1	XKR8,YES1,CD93,LRP1,LYN,PIP5K1A,PIP5K1C,PAK1,AXL,PRKCD,THBS1,C1ORF43,RHOG,RAC1,VAMP7,GAS6,CD36,SRC,SYT7,COLEC12,TGM2,CDC42	-1.8526	-0.557831	22	52
BETA1 INTEGRIN CELL SURFACE INTERACTIONS%PATHWAY INTERACTION DATABASE NCI-NATURE CURATED DATA%BETA1 INTEGRIN CELL SURFACE INTERACTIONS	BETA1 INTEGRIN CELL SURFACE INTERACTIONS%PATHWAY INTERACTION DATABASE NCI-NATURE CURATED DATA%BETA1 INTEGRIN CELL SURFACE INTERACTIONS	0.000157828	0.00533774	-1	LAMA2,COL2A1,COL4A1,LAMB1,COL11A2,LAMA4,COL6A2,COL1A2,LAMC1,COL4A6,COL4A5,LAMC2,COL6A1,LAMB3,LAMA3,ITGA6,LAMA5,FBN1,COL6A3,PLAUR,LAMA1,LAMB2,COL5A1,CSPG4,NID1,FN1,COL1A1,NPNT,TNC,TGFBI,VTN	-2.59867	-0.78625	31	50
PLASMA MEMBRANE ORGANIZATION%GOBP%GO:0007009	PLASMA MEMBRANE ORGANIZATION%GOBP%GO:0007009	0.000158579	0.00533774	-1	XKR8,EPB41L3,CLU,FOLR1,ANO6,EHD2,COL5A1,CD9,SLC9A3R1,MYOF,PACSIN3,ANK3,DEGS1,STX2,BIN3,FLOT1,SNX9	-2.05065	-0.632776	17	45
REGULATION OF INSULIN SECRETION%REACTOME DATABASE ID RELEASE 77%422356	REGULATION OF INSULIN SECRETION%REACTOME DATABASE ID RELEASE 77%422356	0.000159033	0.00533774	-1	GNG5,AHCYL1,CACNB2,AKAP5,STXBP1,GNB4,ITPR1,GNAQ,SLC2A1,CACNB3,ITPR3,GNB1,GNAS,IQGAP1,ACSL3,GNAI2,SNAP25,MARCKS,CACNA1C,GNB2,GNA14,RAP1A,CACNA2D2,GNA11,CD36,ACSL4,GNAI1,PRKAR2A,INS	-2.25375	-0.701047	29	43
BETA1 ADRENERGIC RECEPTOR SIGNALING PATHWAY%PANTHER PATHWAY%P04377	BETA1 ADRENERGIC RECEPTOR SIGNALING PATHWAY%PANTHER PATHWAY%P04377	0.000159464	0.00533774	-1	GNG5,GNG5,GNG5,VAMP8,VAMP8,VAMP8,GNB4,GNB4,STX3,STX3,GNB1,GNB1,GNB1,GNAS,GNAS,SNAP25,SNAP25,GNB2,GNB2,GNB2	-2.53157	-0.793726	20	41
UNTITLED%PANTHER PATHWAY%P05916	UNTITLED%PANTHER PATHWAY%P05916	0.000159464	0.00533774	-1	GNG5,GNG5,GNG5,VAMP8,VAMP8,VAMP8,GNB4,GNB4,STX3,STX3,GNAI3,GNAI3,GNAI3,GNB1,GNB1,GNB1,GNAI2,GNAI2,SNAP25,SNAP25,GNB2,GNB2,GNB2	-2.57797	-0.808274	23	41
OPIOID PROOPIOMELANOCORTIN PATHWAY%PANTHER PATHWAY%P05917	OPIOID PROOPIOMELANOCORTIN PATHWAY%PANTHER PATHWAY%P05917	0.000159464	0.00533774	-1	GNG5,GNG5,GNG5,VAMP8,VAMP8,VAMP8,GNB4,GNB4,STX3,STX3,GNAI3,GNAI3,GNAI3,GNB1,GNB1,GNB1,GNAI2,GNAI2,SNAP25,SNAP25,GNB2,GNB2,GNB2	-2.57797	-0.808274	23	41
PID_INTEGRIN1_PATHWAY%MSIGDB_C2%PID_INTEGRIN1_PATHWAY	PID_INTEGRIN1_PATHWAY%MSIGDB_C2%PID_INTEGRIN1_PATHWAY	0.000160102	0.00533774	-1	COL2A1,COL4A1,LAMB1,COL11A2,LAMA4,COL1A2,LAMC1,COL4A6,COL4A5,LAMC2,COL6A1,LAMB3,LAMA3,ITGA6,LAMA5,FBN1,PLAUR,LAMA1,LAMB2,CSPG4,NID1,COL1A1,NPNT,TNC,TGFBI,VTN	-2.64194	-0.837256	26	39
GABA-B_RECEPTOR_II_SIGNALING%PANTHER PATHWAY%P05731	GABA-B_RECEPTOR_II_SIGNALING%PANTHER PATHWAY%P05731	0.000160102	0.00533774	-1	GNG5,GNG5,GNB4,ADCY9,ADCY9,GNAI3,GNAI3,GNAI3,GNB1,GNB1,GNB1,GNB2,GNB2,GNB2,GABBR1,GABBR1	-2.08634	-0.661182	16	39
OPIOID PROENKEPHALIN PATHWAY%PANTHER PATHWAY%P05915	OPIOID PROENKEPHALIN PATHWAY%PANTHER PATHWAY%P05915	0.000160102	0.00533774	-1	GNG5,GNG5,GNG5,VAMP8,VAMP8,VAMP8,GNB4,GNB4,STX3,STX3,GNAI3,GNAI3,GNAI3,GNB1,GNB1,GNB1,GNAI2,GNAI2,SNAP25,SNAP25,GNB2,GNB2,GNB2	-2.55497	-0.809695	23	39
CORTOCOTROPIN RELEASING FACTOR RECEPTOR SIGNALING PATHWAY%PANTHER PATHWAY%P04380	CORTOCOTROPIN RELEASING FACTOR RECEPTOR SIGNALING PATHWAY%PANTHER PATHWAY%P04380	0.00016129	0.00533774	-1	GNG5,GNG5,GNG5,VAMP8,VAMP8,VAMP8,GNB4,GNB4,GNAQ,GNAQ,GNAQ,STX3,STX3,GNB1,GNB1,GNB1,GNAS,SNAP25,SNAP25,GNB2,GNB2,GNB2,GNA14,GNA14,GNA11,GNA11,SNAP23,SNAP23	-2.52333	-0.805051	28	38
ENKEPHALIN RELEASE%PANTHER PATHWAY%P05913	ENKEPHALIN RELEASE%PANTHER PATHWAY%P05913	0.00016129	0.00533774	-1	GNG5,GNG5,GNG5,GNB4,GNB4,GNAI3,GNAI3,GNAI3,GNB1,GNB1,GNB1,GNAS,GNAI2,GNAI2,GNB2,GNB2,GNB2,CREM,CREM	-2.35241	-0.750519	19	38
COLLAGEN BIOSYNTHESIS AND MODIFYING ENZYMES%REACTOME DATABASE ID RELEASE 77%1650814	COLLAGEN BIOSYNTHESIS AND MODIFYING ENZYMES%REACTOME DATABASE ID RELEASE 77%1650814	0.00016129	0.00533774	-1	COL2A1,COL4A1,COL11A2,COL14A1,COL6A2,COL1A2,COL23A1,COL4A6,PLOD2,COL4A5,COL6A1,PCOLCE2,ADAMTS3,COL6A3,COL5A1,P4HA1,COL21A1,COL1A1,PLOD1,BMP1,PCOLCE,PLOD3,ADAMTS14,COL26A1,COL6A6,COL4A2	-2.46729	-0.78717	26	38
5HT4 TYPE RECEPTOR MEDIATED SIGNALING PATHWAY%PANTHER PATHWAY%P04376	5HT4 TYPE RECEPTOR MEDIATED SIGNALING PATHWAY%PANTHER PATHWAY%P04376	0.000163693	0.00533774	-1	GNG5,GNG5,GNG5,SLC6A4,SLC6A4,VAMP8,VAMP8,VAMP8,GNB4,GNB4,STX3,STX3,GNB1,GNB1,GNB1,GNAS,SNAP25,SNAP25,GNB2,GNB2,GNB2	-2.59809	-0.853988	21	33
ANTI-INFLAMMATORY RESPONSE FAVOURING LEISHMANIA PARASITE INFECTION%REACTOME%R-HSA-9662851.1	ANTI-INFLAMMATORY RESPONSE FAVOURING LEISHMANIA PARASITE INFECTION%REACTOME%R-HSA-9662851.1	0.000163693	0.00533774	-1	GNG5,AHCYL1,GNAZ,YES1,GNB4,ITPR1,ADAM17,ADCY9,GNAI3,ITPR3,GNB1,GNAS,LYN,GNAI2,GNB2,FURIN	-2.22826	-0.732426	16	33
GPCR LIGAND BINDING%REACTOME%R-HSA-500792.3	GPCR LIGAND BINDING%REACTOME%R-HSA-500792.3	0.000163693	0.00533774	-1	GNG5,TRH,ADRA2B,FZD6,GNB4,CD55,LPAR2,GNB1,GNAS,NMB,WNT11,S1PR1,GNB2,GABBR1	-2.09963	-0.690145	14	33
LEISHMANIA PARASITE GROWTH AND SURVIVAL%REACTOME%R-HSA-9664433.1	LEISHMANIA PARASITE GROWTH AND SURVIVAL%REACTOME%R-HSA-9664433.1	0.000163693	0.00533774	-1	GNG5,AHCYL1,GNAZ,YES1,GNB4,ITPR1,ADAM17,ADCY9,GNAI3,ITPR3,GNB1,GNAS,LYN,GNAI2,GNB2,FURIN	-2.22826	-0.732426	16	33
A6B1 AND A6B4 INTEGRIN SIGNALING%PATHWAY INTERACTION DATABASE NCI-NATURE CURATED DATA%A6B1 AND A6B4 INTEGRIN SIGNALING	A6B1 AND A6B4 INTEGRIN SIGNALING%PATHWAY INTERACTION DATABASE NCI-NATURE CURATED DATA%A6B1 AND A6B4 INTEGRIN SIGNALING	0.000163854	0.00533774	-1	LAMA2,LAMB1,LAMA4,LAMC1,LAMC2,LAMB3,LAMA3,ITGA6,LAMA5,CDH1,LAMA1,LAMB2,CD9	-2.06592	-0.669261	13	35
NON-INTEGRIN MEMBRANE-ECM INTERACTIONS%REACTOME%R-HSA-3000171.3	NON-INTEGRIN MEMBRANE-ECM INTERACTIONS%REACTOME%R-HSA-3000171.3	0.000163854	0.00533774	-1	LAMA2,LAMB1,LAMC3,LAMA4,HSPG2,LAMC1,LAMC2,LAMB3,LAMA3,ITGA6,LAMA5,LAMA1,LAMB2,AGRN,TNC,SDC3,VTN,PDGFB	-2.23145	-0.722884	18	35
INTEGRIN CELL SURFACE INTERACTIONS%REACTOME%R-HSA-216083.4	INTEGRIN CELL SURFACE INTERACTIONS%REACTOME%R-HSA-216083.4	0.00016415	0.00533774	-1	COL4A1,LUM,HSPG2,COL23A1,F11R,ICAM1,ICAM5,BSG,ITGA6,FBN1,CDH1,AGRN,ITGB6,CD44,FN1,TNC,VTN,THBS1,FGG	-2.21262	-0.715024	19	36
ECM PROTEOGLYCANS%REACTOME DATABASE ID RELEASE 77%3000178	ECM PROTEOGLYCANS%REACTOME DATABASE ID RELEASE 77%3000178	0.00016415	0.00533774	-1	LAMA2,LAMB1,LAMA4,LUM,HSPG2,LAMC1,FMOD,BGN,LAMA3,LAMA5,LAMA1,LAMB2,AGRN,ITGB6,DCN,TNC,VCAN,VTN,NCAM1,HAPLN1	-2.335	-0.754575	20	36
BETA3 ADRENERGIC RECEPTOR SIGNALING PATHWAY%PANTHER PATHWAY%P04379	BETA3 ADRENERGIC RECEPTOR SIGNALING PATHWAY%PANTHER PATHWAY%P04379	0.000164663	0.00533774	-1	GNG5,GNG5,GNG5,VAMP8,VAMP8,VAMP8,GNB4,GNB4,STX3,STX3,GNB1,GNB1,GNB1,GNAS,GNAS,SNAP25,SNAP25,GNB2,GNB2,GNB2	-2.55854	-0.848157	20	32
ADENYLATE CYCLASE-MODULATING G PROTEIN-COUPLED RECEPTOR SIGNALING PATHWAY%GOBP%GO:0007188	ADENYLATE CYCLASE-MODULATING G PROTEIN-COUPLED RECEPTOR SIGNALING PATHWAY%GOBP%GO:0007188	0.000164663	0.00533774	-1	ADRA2B,GRK5,GNAZ,AKAP5,GNAQ,GNA12,ADCY9,GNAI3,LPAR2,GNB1,GNAS,AKAP12,GNAI2,S1PR1,GABBR1,GNA14	-2.01162	-0.666853	16	32
NCAM SIGNALING FOR NEURITE OUT-GROWTH%REACTOME%R-HSA-375165.3	NCAM SIGNALING FOR NEURITE OUT-GROWTH%REACTOME%R-HSA-375165.3	0.000164935	0.00533774	-1	NRAS,COL4A1,CACNB2,COL6A2,COL4A5,COL6A1,SPTBN2,COL6A3,AGRN,CACNB3,HRAS,CACNA1C,NCAM1,COL6A6,RPS6KA5,COL4A2	-2.14499	-0.724537	16	29
CELL COMMUNICATION INVOLVED IN CARDIAC CONDUCTION%GOBP%GO:0086065	CELL COMMUNICATION INVOLVED IN CARDIAC CONDUCTION%GOBP%GO:0086065	0.000164935	0.00533774	-1	DSG2,ATP1A2,CACNB2,DSC2,ATP1B1,ATP1A1,DSP,ATP1B2,CTNNA3,JUP,CXADR,CACNA1C,KCNQ1,FKBP1B,CACNA2D1	-2.00084	-0.675846	15	29
ELASTIC FIBRE FORMATION%REACTOME DATABASE ID RELEASE 77%1566948	ELASTIC FIBRE FORMATION%REACTOME DATABASE ID RELEASE 77%1566948	0.000165262	0.00533774	-1	BMP10,FBN2,LOXL3,FBN1,BMP7,LOXL2,MFAP2,ITGB6,LTBP2,VTN,LTBP4,FURIN,LOXL4,MFAP4,MFAP1,FBN3,LTBP1,FBLN2,ITGA5,TGFB1	-2.04314	-0.686627	20	30
DISEASES ASSOCIATED WITH GLYCOSAMINOGLYCAN METABOLISM%REACTOME%R-HSA-3560782.2	DISEASES ASSOCIATED WITH GLYCOSAMINOGLYCAN METABOLISM%REACTOME%R-HSA-3560782.2	0.000165262	0.00533774	-1	CHST6,LUM,CHST14,HSPG2,GPC1,FMOD,PRELP,CHSY1,BGN,AGRN,CSPG4,DCN,B4GALT1,VCAN,SDC3	-2.1838	-0.733897	15	30
ASSEMBLY OF COLLAGEN FIBRILS AND OTHER MULTIMERIC STRUCTURES%REACTOME DATABASE ID RELEASE 77%2022090	ASSEMBLY OF COLLAGEN FIBRILS AND OTHER MULTIMERIC STRUCTURES%REACTOME DATABASE ID RELEASE 77%2022090	0.000165262	0.00533774	-1	COL2A1,COL4A1,COL11A2,COL6A2,COL1A2,COL4A5,LOXL3,LAMC2,COL6A1,LAMB3,LAMA3,ITGA6,COL6A3,COL5A1,LOXL2,PLEC,PXDN,COL1A1	-2.2747	-0.764446	18	30
BETA3 INTEGRIN CELL SURFACE INTERACTIONS%PATHWAY INTERACTION DATABASE NCI-NATURE CURATED DATA%BETA3 INTEGRIN CELL SURFACE INTERACTIONS	BETA3 INTEGRIN CELL SURFACE INTERACTIONS%PATHWAY INTERACTION DATABASE NCI-NATURE CURATED DATA%BETA3 INTEGRIN CELL SURFACE INTERACTIONS	0.000166251	0.00533774	-1	COL4A1,LAMB1,THY1,LAMA4,COL1A2,LAMC1,COL4A6,COL4A5,F11R,FBN1,PLAUR,FN1,COL1A1,TNC,TGFBI,VTN,PDGFB,THBS1,FGG	-2.48416	-0.858828	19	26
NICOTINE PHARMACODYNAMICS PATHWAY%PANTHER PATHWAY%P06587	NICOTINE PHARMACODYNAMICS PATHWAY%PANTHER PATHWAY%P06587	0.000166251	0.00533774	-1	EPB41L1,EPB41L1,EPB41L2,EPB41L2,EPB41,EPB41,GNAI3,GNB1,GNB1,GNB1,CACNA1C,PPP1R1B,PPP1R1B	-2.12018	-0.732993	13	26
MET PROMOTES CELL MOTILITY%REACTOME DATABASE ID RELEASE 77%8875878	MET PROMOTES CELL MOTILITY%REACTOME DATABASE ID RELEASE 77%8875878	0.00016728	0.00533774	-1	LAMA2,LAMB1,LAMC3,LAMA4,LAMC1,LAMC2,LAMB3,LAMA3,LAMA5,LAMA1,LAMB2	-2.1747	-0.759382	11	25
DISEASES ASSOCIATED WITH O-GLYCOSYLATION OF PROTEINS%REACTOME DATABASE ID RELEASE 77%3906995	DISEASES ASSOCIATED WITH O-GLYCOSYLATION OF PROTEINS%REACTOME DATABASE ID RELEASE 77%3906995	0.00016728	0.00533774	-1	ADAMTSL4,ADAMTS7,ADAMTS3,ADAMTSL1,ADAMTS6,THSD4,ADAMTS19,ADAMTS9,ADAMTS1,THBS1,NOTCH3,ADAMTS14,B4GAT1,ADAMTS15,ADAMTS12,DAG1	-1.99393	-0.696258	16	25
COLLAGEN FIBRIL ORGANIZATION%GOBP%GO:0030199	COLLAGEN FIBRIL ORGANIZATION%GOBP%GO:0030199	0.00016728	0.00533774	-1	COL2A1,COL11A2,LUM,COL14A1,COL1A2,LOXL3,ADAMTS3,COL5A1,LOXL2,PXDN,COL1A1,ATP7A,BMP1,PLOD3,ADAMTS14	-2.21946	-0.775008	15	25
SYNDECAN-1-MEDIATED SIGNALING EVENTS%PATHWAY INTERACTION DATABASE NCI-NATURE CURATED DATA%SYNDECAN-1-MEDIATED SIGNALING EVENTS	SYNDECAN-1-MEDIATED SIGNALING EVENTS%PATHWAY INTERACTION DATABASE NCI-NATURE CURATED DATA%SYNDECAN-1-MEDIATED SIGNALING EVENTS	0.000168407	0.00533774	-1	COL2A1,COL4A1,COL11A2,COL6A2,COL1A2,COL4A6,COL4A5,BSG,COL6A1,LAMA5,COL6A3,COL5A1,COL1A1	-2.26662	-0.813269	13	22
BETA2 ADRENERGIC RECEPTOR SIGNALING PATHWAY%PANTHER PATHWAY%P04378	BETA2 ADRENERGIC RECEPTOR SIGNALING PATHWAY%PANTHER PATHWAY%P04378	0.000168407	0.00533774	-1	GNG5,GNG5,GNG5,GNB4,GNB4,GNB1,GNB1,GNB1,GNAS,GNAS,GNB2,GNB2,GNB2	-2.29772	-0.810482	13	24
BLOOD COAGULATION%PANTHER PATHWAY%P00011	BLOOD COAGULATION%PANTHER PATHWAY%P00011	0.000168407	0.00533774	-1	PLAUR,PLAUR,SERPINA1,SERPINA1,FGG,A2M,F13A1,F13A1,SERPINE1,SERPINE1,PROCR,PROCR,PLAT,PLAT	-2.06568	-0.741168	14	22
HISTAMINE H2 RECEPTOR MEDIATED SIGNALING PATHWAY%PANTHER PATHWAY%P04386	HISTAMINE H2 RECEPTOR MEDIATED SIGNALING PATHWAY%PANTHER PATHWAY%P04386	0.000168407	0.00533774	-1	GNG5,GNG5,GNG5,GNB4,GNB4,GNB1,GNB1,GNB1,GNAS,GNAS,GNB2,GNB2,GNB2	-2.29772	-0.810482	13	24
SYNAPTIC_VESICLE_TRAFFICKING%PANTHER PATHWAY%P05734	SYNAPTIC_VESICLE_TRAFFICKING%PANTHER PATHWAY%P05734	0.000168407	0.00533774	-1	COMT,STXBP1,STXBP1,STX1B,STX1B,STX1B,STX2,STX2,STX2,SNAP25,SNAP25	-2.08792	-0.749149	11	22
COLLAGEN CHAIN TRIMERIZATION%REACTOME%R-HSA-8948216.3	COLLAGEN CHAIN TRIMERIZATION%REACTOME%R-HSA-8948216.3	0.000168407	0.00533774	-1	COL2A1,COL4A1,COL11A2,COL14A1,COL6A2,COL1A2,COL23A1,COL4A6,COL4A5,COL6A1,COL6A3,COL5A1,COL21A1,COL1A1	-2.33316	-0.83714	14	22
LAMININ INTERACTIONS%REACTOME DATABASE ID RELEASE 77%3000157	LAMININ INTERACTIONS%REACTOME DATABASE ID RELEASE 77%3000157	0.000168407	0.00533774	-1	LAMA2,LAMB1,LAMC3,NID2,LAMA4,HSPG2,LAMC1,LAMC2,LAMB3,LAMA3,ITGA6,LAMA5,LAMA1,LAMB2,NID1	-2.54874	-0.91449	15	22
SODIUM ION TRANSPORT%GOBP%GO:0006814	SODIUM ION TRANSPORT%GOBP%GO:0006814	0.000168407	0.00533774	-1	SLC6A4,ATP1A2,ATP1B1,ATP1A1,SLC4A8,SLC9A1,ATP1B2,ANO6,FGF13	-1.97479	-0.696575	9	24
PID_INTEGRIN3_PATHWAY%MSIGDB_C2%PID_INTEGRIN3_PATHWAY	PID_INTEGRIN3_PATHWAY%MSIGDB_C2%PID_INTEGRIN3_PATHWAY	0.000168492	0.00533774	-1	COL4A1,LAMB1,THY1,LAMA4,COL1A2,LAMC1,COL4A6,COL4A5,F11R,FBN1,PLAUR,COL1A1,TNC,TGFBI,VTN,CYR61,THBS1	-2.42908	-0.86438	17	23
ADRENALINE AND NORADRENALINE BIOSYNTHESIS%PANTHER PATHWAY%P00001	ADRENALINE AND NORADRENALINE BIOSYNTHESIS%PANTHER PATHWAY%P00001	0.000168492	0.00533774	-1	COMT,COMT,MAOA,MAOA,SNAP25,SNAP25,SNAP23,STX12,STX12,STX12	-1.96676	-0.699864	10	23
ENDOGENOUS_CANNABINOID_SIGNALING%PANTHER PATHWAY%P05730	ENDOGENOUS_CANNABINOID_SIGNALING%PANTHER PATHWAY%P05730	0.000169062	0.00533774	-1	GNG5,GNG5,GNB4,GNAI3,GNAI3,GNAI3,GNB1,GNB1,GNB1,GNB2,GNB2,GNB2	-2.23406	-0.811201	12	21
AMINE METABOLIC PROCESS%GOBP%GO:0009308	AMINE METABOLIC PROCESS%GOBP%GO:0009308	0.000169062	0.00533774	-1	MOXD1,COMT,TRH,CHDH,ATP7A,MAOA,SULT1A2,HAND2	-2.08602	-0.757445	8	21
PID_SYNDECAN_1_PATHWAY%MSIGDB_C2%PID_SYNDECAN_1_PATHWAY	PID_SYNDECAN_1_PATHWAY%MSIGDB_C2%PID_SYNDECAN_1_PATHWAY	0.000169434	0.00533774	-1	COL2A1,COL4A1,COL11A2,COL14A1,COL1A2,COL4A6,COL4A5,COL6A1,LAMA5,COL1A1	-2.1648	-0.796187	10	20
5HT3 TYPE RECEPTOR MEDIATED SIGNALING PATHWAY%PANTHER PATHWAY%P04375	5HT3 TYPE RECEPTOR MEDIATED SIGNALING PATHWAY%PANTHER PATHWAY%P04375	0.000170213	0.00533774	-1	SLC6A4,SLC6A4,VAMP8,VAMP8,VAMP8,STX3,STX3,SNAP25,SNAP25	-2.16605	-0.805795	9	19
CELLULAR AMINE METABOLIC PROCESS%GOBP%GO:0044106	CELLULAR AMINE METABOLIC PROCESS%GOBP%GO:0044106	0.000170213	0.00533774	-1	MOXD1,COMT,TRH,CHDH,ATP7A,MAOA,HAND2	-2.02937	-0.754948	7	19
CELLULAR BIOGENIC AMINE METABOLIC PROCESS%GOBP%GO:0006576	CELLULAR BIOGENIC AMINE METABOLIC PROCESS%GOBP%GO:0006576	0.000170213	0.00533774	-1	MOXD1,COMT,TRH,CHDH,ATP7A,MAOA,HAND2	-2.02937	-0.754948	7	19
CELL-CELL JUNCTION ORGANIZATION%REACTOME DATABASE ID RELEASE 77%421270	CELL-CELL JUNCTION ORGANIZATION%REACTOME DATABASE ID RELEASE 77%421270	0.000170678	0.00533774	-1	CADM1,F11R,JUP,CDH1,CLDN6,CTNNA1,SDK2,CTNNB1	-2.04928	-0.772032	8	18
G ALPHA (Z) SIGNALLING EVENTS%REACTOME%R-HSA-418597.4	G ALPHA (Z) SIGNALLING EVENTS%REACTOME%R-HSA-418597.4	0.000170678	0.00533774	-1	GNG5,ADRA2B,GNAZ,GNB4,ADCY9,GNAI3,GNB1,GNAS,GNAI2,GNB2,RGS19,PRKCD	-2.11904	-0.798315	12	18
SODIUM ION TRANSMEMBRANE TRANSPORT%GOBP%GO:0035725	SODIUM ION TRANSMEMBRANE TRANSPORT%GOBP%GO:0035725	0.000170678	0.00533774	-1	SLC6A4,ATP1A2,ATP1B1,ATP1A1,SLC4A8,SLC9A1,ATP1B2,ANO6	-1.99949	-0.753274	8	18
HETEROTRIMERIC G-PROTEIN SIGNALING PATHWAY-ROD OUTER SEGMENT PHOTOTRANSDUCTION%PANTHER PATHWAY%P00028	HETEROTRIMERIC G-PROTEIN SIGNALING PATHWAY-ROD OUTER SEGMENT PHOTOTRANSDUCTION%PANTHER PATHWAY%P00028	0.00017191	0.00533774	-1	GNG5,GNG5,GNB4,GNB4,GNB1,GNB1,GNB1,GNB2,GNB2,GNB2	-2.23783	-0.853731	10	17
MET ACTIVATES PTK2 SIGNALING%REACTOME DATABASE ID RELEASE 77%8874081	MET ACTIVATES PTK2 SIGNALING%REACTOME DATABASE ID RELEASE 77%8874081	0.000172712	0.00533774	-1	LAMA2,LAMB1,LAMC3,LAMA4,LAMC1,LAMC2,LAMB3,LAMA3,LAMA5,LAMA1,LAMB2	-2.35017	-0.908185	11	16
BIOCARTA_IGF1MTOR_PATHWAY%MSIGDB_C2%BIOCARTA_IGF1MTOR_PATHWAY	BIOCARTA_IGF1MTOR_PATHWAY%MSIGDB_C2%BIOCARTA_IGF1MTOR_PATHWAY	0.000238949	0.00632583	1	PIK3R1,PIK3CA,PTEN,PDK2,EIF2S2,EIF2S1,EIF4E,EIF2B5,GSK3B,MTOR	1.99705	0.718398	10	17
PINK1-PRKN MEDIATED MITOPHAGY%REACTOME DATABASE ID RELEASE 77%5205685	PINK1-PRKN MEDIATED MITOPHAGY%REACTOME DATABASE ID RELEASE 77%5205685	0.000238949	0.00632583	1	MAP1LC3B,MFN2,ATG5,MFN1,SQSTM1,MTERF3,VDAC1,TOMM7,TOMM22,UBA52,ATG12,TOMM40	2.05741	0.740114	12	17
REGULATION OF LOCOMOTION%GOBP%GO:0040012	REGULATION OF LOCOMOTION%GOBP%GO:0040012	0.000239063	0.00632583	-1	MOSPD2,STC1,MTUS1,LAMB1,THY1,BMP10,RECK,CD99,PODN,ICAM1,LAMC2,SH3RF2,ENG,ATP1B2,ANO6,ITGA6,JUP,CDH1,GNA12,ADAM17,SP100,EPHB2,STX3,LRP1,ADAM10,MYO1C,NRP2,MPP1,SRPX2,PODXL,TJP1,RAP2C,DCN,ROR2,FN1,COL1A1,ZNF609,SEMA4B,BMPER,ST3GAL4,LYN,P2RX4,ZMYND8,SFRP1,SP1,BST2,PIK3C2A,NRP1,WNT11,PAK1,MMP14,EMILIN1,HRAS,SEMA4D,VTN,PLXND1,PDGFB,ADAMTS9,DDX58,SEMA3C,SERPINE2,MECP2,ADAMTS1,CAMK2B,STK10,SEMA4C,MAGI2,M…	-1.50111	-0.352401	101	374
BIOCARTA_EIF4_PATHWAY%MSIGDB_C2%BIOCARTA_EIF4_PATHWAY	BIOCARTA_EIF4_PATHWAY%MSIGDB_C2%BIOCARTA_EIF4_PATHWAY	0.000241371	0.00632583	1	PIK3R1,PIK3CA,PTEN,EIF4G1,PDK2,PABPC1,PRKCA,MAPK1,EIF4E,MTOR,EIF4A2,EIF4A1,MAPK14	2.00813	0.712656	13	18
CYTOPLASMIC TRANSLATIONAL INITIATION%GOBP%GO:0002183	CYTOPLASMIC TRANSLATIONAL INITIATION%GOBP%GO:0002183	0.000241371	0.00632583	1	EIF5,EIF4G1,EIF2B3,EIF2S2,EIF3I,EIF3M,EIF3A,EIF3D,MCTS1,EIF4A2,EIF4B,EIF4A1,DENR	2.0186	0.71637	13	18
MITOPHAGY%REACTOME%R-HSA-5205647.4	MITOPHAGY%REACTOME%R-HSA-5205647.4	0.000243902	0.00632583	1	MAP1LC3B,MFN2,ATG5,MFN1,SQSTM1,MTERF3,VDAC1,TOMM7,CSNK2B,TOMM22,UBA52,ATG12,TOMM40	2.02929	0.698898	13	20
MTORC1-MEDIATED SIGNALLING%REACTOME DATABASE ID RELEASE 77%166208	MTORC1-MEDIATED SIGNALLING%REACTOME DATABASE ID RELEASE 77%166208	0.000244678	0.00632583	1	RRAGC,EIF4G1,RRAGA,YWHAB,LAMTOR3,EIF4E,RPTOR,AKT1S1,LAMTOR1,MTOR,FKBP1A,EIF4B,RPS6	1.98764	0.675127	13	21
MITOCHONDRION LOCALIZATION%GOBP%GO:0051646	MITOCHONDRION LOCALIZATION%GOBP%GO:0051646	0.000245881	0.00632583	1	DNM1L,CLUH,MSTO1,TRAK1,MFN2,RHOT2,MFN1,LRPPRC,ACTR10	2.17177	0.718191	9	23
PROTEIN DEPOLYMERIZATION%GOBP%GO:0051261	PROTEIN DEPOLYMERIZATION%GOBP%GO:0051261	0.000246063	0.00632583	1	DSTN,CFL2,KATNB1,CFL1,WDR1,STMN1,STMN2,MICAL2,GAK,VPS4A,KIF14	2.024	0.678986	11	22
CELLULAR PROTEIN COMPLEX DISASSEMBLY%GOBP%GO:0043624	CELLULAR PROTEIN COMPLEX DISASSEMBLY%GOBP%GO:0043624	0.000257798	0.00632583	1	DSTN,CFL2,MTRF1L,KATNB1,CFL1,WDR1,NAPB,STMN1,APEH,GSPT1,STMN2,MICAL2,ABCE1,GAK,ETF1,VPS4A,KIF14,GSPT2	2.1068	0.637583	18	34
CELL-CELL SIGNALING%GOBP%GO:0007267	CELL-CELL SIGNALING%GOBP%GO:0007267	0.00025937	0.00632583	-1	TRH,ADRA2B,MPP2,THY1,FZD6,CACNB2,STXBP2,AKAP5,STXBP1,EFNB3,LIN7C,FGF13,GNAQ,STXBP3,STX1B,STX3,AGRN,ADAM10,CNP,GDF15,CACNB3,DLG1,MPZL1,GNB1,NMB,PCDHB14,SFRP1,SLC32A1,SFRP5,NRP1,PIP5K1C,WNT11,GNAI2,PDZD11,DTNA,STX2,SNAP25,PDGFB,CACNA1C,FAT1,LTBP4,MAGI2,CTNNB1,DTNB,GABBR1,KCNQ1,PDLIM4,RHOA,SLC1A4,CACNA2D1,PCSK5,FGF2,RAC1,PKP4,GNA11,SDCBP,CAV1,SNAP23,STX4,AGT,TCF7L1,LIN7A,RAC3,GPC4,SLC1A3,CELSR2,FADS…	-1.56782	-0.386164	70	209
REGULATION OF ORNITHINE DECARBOXYLASE (ODC)%REACTOME DATABASE ID RELEASE 77%350562	REGULATION OF ORNITHINE DECARBOXYLASE (ODC)%REACTOME DATABASE ID RELEASE 77%350562	0.000266241	0.00632583	1	PSME4,PSMF1,PSMD9,PSME3,PSMD5,PSMA5,PSMB6,PSMD4,PSMA1,PSMA7,PSMB3,PSMB4,PSMA6,PSMD11,PSMD1	1.86119	0.547242	15	39
CARBOHYDRATE METABOLISM%REACTOME DATABASE ID RELEASE 77%71387	CARBOHYDRATE METABOLISM%REACTOME DATABASE ID RELEASE 77%71387	0.000266916	0.00632583	-1	CHST6,PCK2,LUM,CHST14,HSPG2,GPC1,FMOD,PRELP,HK2,SLC9A1,CHSY1,BGN,ENO2,B4GALT4,AGRN,SLC2A1,CSPG4,DCN,CD44,B4GALT1,NUP85,ST3GAL4,AAAS,HS3ST3B1,VCAN,PYGL,SDC3,PFKL,ENO1,TPR,SHPK,NUP35,NUP62,PYGM,GALK1,PAPSS2,B4GAT1,NUP153,NUP54,CHST12,HS3ST1,PGM2,GPC3	-1.62447	-0.407969	43	175
TRANSLATIONAL INITIATION%GOBP%GO:0006413	TRANSLATIONAL INITIATION%GOBP%GO:0006413	0.000269251	0.00632583	1	EIF3K,PAIP1,EIF3C,EIF5,EIF3E,EIF4G1,EIF2B3,EIF3B,EIF2S2,EIF3I,EIF2B4,LARP1,RPS5,MTIF3,ABCE1,RPS17,EIF2B5,EIF3M,EIF3A,EIF3F,EIF3D,MCTS1,EIF3H,EIF4A2,EIF4B,EIF4A1,DENR,EIF2B2,RPS3,EIF3L	2.31691	0.666127	30	43
UBIQUITIN-DEPENDENT DEGRADATION OF CYCLIN D%REACTOME%R-HSA-75815.3	UBIQUITIN-DEPENDENT DEGRADATION OF CYCLIN D%REACTOME%R-HSA-75815.3	0.000269397	0.00632583	1	PSME4,PSMF1,CDK4,PSMD9,PSME3,PSMD5,PSMA5,PSMB6,GSK3B,PSMD4,PSMA1,PSMA7,PSMB3,PSMB4,UBA52,PSMA6,PSMD11,CCND1	1.95979	0.559406	18	44
AUF1 (HNRNP D0) BINDS AND DESTABILIZES MRNA%REACTOME DATABASE ID RELEASE 77%450408	AUF1 (HNRNP D0) BINDS AND DESTABILIZES MRNA%REACTOME DATABASE ID RELEASE 77%450408	0.000270563	0.00632583	1	HSPA8,PSME4,EIF4G1,PSMF1,HSPB1,PABPC1,PSMD9,PSME3,PSMD5,PSMA5,PSMB6,PSMD4,PSMA1,PSMA7,PSMB3,PSMB4,UBA52	2.12115	0.602675	17	45
FBXL7 DOWN-REGULATES AURKA DURING MITOTIC ENTRY AND IN EARLY MITOSIS%REACTOME%R-HSA-8854050.2	FBXL7 DOWN-REGULATES AURKA DURING MITOTIC ENTRY AND IN EARLY MITOSIS%REACTOME%R-HSA-8854050.2	0.000271518	0.00632583	1	PSME4,PSMF1,FBXL7,PSMD9,PSME3,PSMD5,PSMA5,PSMB6,PSMD4,PSMA1,PSMA7,PSMB3,PSMB4,UBA52,FBXL18,PSMA6,PSMD11	1.91275	0.540873	17	46
DEGRADATION OF DVL%REACTOME%R-HSA-4641258.2	DEGRADATION OF DVL%REACTOME%R-HSA-4641258.2	0.000271518	0.00632583	1	PSME4,PSMF1,PSMD9,PSME3,PSMD5,PSMA5,DVL2,PSMB6,PSMD4,PSMA1,CUL3,PSMA7,PSMB3,PSMB4,UBA52,DACT1,PSMA6,PSMD11	1.97965	0.559793	18	46
ORGANELLE TRANSPORT ALONG MICROTUBULE%GOBP%GO:0072384	ORGANELLE TRANSPORT ALONG MICROTUBULE%GOBP%GO:0072384	0.000271518	0.00632583	1	BICD2,TRAK1,RHOT2,LRPPRC,DYNC1H1,ACTR10,AP3S2,AP3D1,DYNC1I1,NDEL1,COPG1,FYCO1,AP3B1,NEFL,KIF13A,KIF1C,PAFAH1B1,BLOC1S4,AP3S1,BICD1,NDE1,PEX14,KIF5B,RAB6A,BLOC1S5	1.93991	0.548556	25	46
SELECTIVE AUTOPHAGY%REACTOME%R-HSA-9663891.3	SELECTIVE AUTOPHAGY%REACTOME%R-HSA-9663891.3	0.000271592	0.00632583	1	MAP1LC3B,HSPA8,MFN2,UBE2N,PARK7,ATG5,MFN1,SQSTM1,MTERF3,DYNC1H1,HSP90AA1,VDAC1,DYNC1I1,VCP,TOMM7,CSNK2B,UBE2V1,USP30,TOMM22,UBA52,ATG12,TOMM40,HSF1,DYNC1I2,DYNC1LI1,PCNT,PLIN3,PRKAA2,CSNK2A1	2.05963	0.579656	29	47
MITOCHONDRIAL TRANSLATION%GOBP%GO:0032543	MITOCHONDRIAL TRANSLATION%GOBP%GO:0032543	0.000271592	0.00632583	1	MRPS2,MRPS11,MTRF1L,MRPS18B,MRPS14,MRPL51,MRPS18A,MRPL23,PTCD3,GATB,MRPS16,MRPS21,MRPS7,MRPS28,MRPL57,MTIF3,MRPS17,MRPS24,RARS2,SARS2,MRPS34,EARS2,QRSL1,MRPS12,FASTKD2,MRPS6,TUFM,MRPL44,MRPS15,MRPL2,YARS2	1.97354	0.555427	31	47
OXYGEN-DEPENDENT PROLINE HYDROXYLATION OF HYPOXIA-INDUCIBLE FACTOR ALPHA%REACTOME DATABASE ID RELEASE 77%1234176	OXYGEN-DEPENDENT PROLINE HYDROXYLATION OF HYPOXIA-INDUCIBLE FACTOR ALPHA%REACTOME DATABASE ID RELEASE 77%1234176	0.000271813	0.00632583	1	PSME4,UBE2D3,PSMF1,UBE2D1,PSMD9,PSME3,PSMD5,PSMA5,PSMB6,PSMD4,CUL2,PSMA1,PSMA7,PSMB3,PSMB4,UBA52,AJUBA,PSMA6,PSMD11	1.95727	0.549484	19	48
FORMATION OF THE TERNARY COMPLEX, AND SUBSEQUENTLY, THE 43S COMPLEX%REACTOME DATABASE ID RELEASE 77%72695	FORMATION OF THE TERNARY COMPLEX, AND SUBSEQUENTLY, THE 43S COMPLEX%REACTOME DATABASE ID RELEASE 77%72695	0.000272777	0.00632583	1	RPS4Y1,EIF3K,EIF3C,RPS29,RPS10,EIF3E,RPS14,EIF3B,RPS18,RPS16,RPS28,EIF2S2,EIF3I,RPS19,RPS2,EIF2S1,RPS20,RPS5,RPS11,FAU,RPS17,RPS8,EIF3M,EIF3A,RPS21,EIF3F,EIF3D,RPS15A,RPSA,RPS7,EIF3H	2.46837	0.685425	31	50
TNFR2 NON-CANONICAL NF-KB PATHWAY%REACTOME DATABASE ID RELEASE 77%5668541	TNFR2 NON-CANONICAL NF-KB PATHWAY%REACTOME DATABASE ID RELEASE 77%5668541	0.000272851	0.00632583	1	TNFRSF12A,PSME4,PSMF1,PSMD9,PSME3,PSMD5,PSMA5,TRAF3,PSMB6,UBA3,PSMD4,PSMA1,PSMA7,PSMB3,PSMB4,UBA52,PSMA6,TNFRSF9,PSMD11	1.91224	0.526026	19	52
REGULATION OF TRANSLATIONAL INITIATION%GOBP%GO:0006446	REGULATION OF TRANSLATIONAL INITIATION%GOBP%GO:0006446	0.000273299	0.00632583	1	EIF1,CSDE1,PAIP1,HABP4,CTIF,YTHDF3,EIF5,EIF5B,EIF3E,YTHDF2,EIF4G1,EIF3B,EIF4G2,HSPB1,EIF4G3,EIF2S1,NCK2,LARP1,AGO2,EIF2B5,EIF2AK3,MTOR,EIF3H,RPS6KB2,EIF4A2,DDX1,EIF4B,MIF4GD,EIF2B2	2.106	0.573972	29	54
ASYMMETRIC LOCALIZATION OF PCP PROTEINS%REACTOME%R-HSA-4608870.1	ASYMMETRIC LOCALIZATION OF PCP PROTEINS%REACTOME%R-HSA-4608870.1	0.000273373	0.00632583	1	PSME4,FZD2,PRICKLE1,SMURF2,PSMF1,PSMD9,PSME3,PSMD5,PSMA5,DVL2,PSMB6,PSMD4,PSMA1,PSMA7,PSMB3,PSMB4,UBA52	1.94189	0.53706	17	51
REGULATION OF RUNX2 EXPRESSION AND ACTIVITY%REACTOME DATABASE ID RELEASE 77%8939902	REGULATION OF RUNX2 EXPRESSION AND ACTIVITY%REACTOME DATABASE ID RELEASE 77%8939902	0.000273373	0.00632583	1	PSME4,CBFB,PSMF1,NR3C1,PSMD9,PSME3,PSMD5,PSMA5,PSMB6,GSK3B,PSMD4,PSMA1,PSMA7,PSMB3,PSMB4,UBA52,PSMA6,PSMD11,WWP1,PSMD1	1.95879	0.541733	20	51
SIGNALING BY GPCR%REACTOME%R-HSA-372790.4	SIGNALING BY GPCR%REACTOME%R-HSA-372790.4	0.000274386	0.00632583	-1	GNG5,TRH,NRAS,ADRA2B,AHCYL1,FZD6,GRK5,GNAZ,GNB4,ARHGEF5,ITPR1,GNAQ,GNA12,ARHGEF16,ADCY9,GNAI3,CD55,LPAR2,ITPR3,GNB1,GNAS,NMB,WNT11,PAK1,GNAI2,HRAS,S1PR1,GNB2,RGS19,CAMK2B,PRKCD,GABBR1,PPP1R1B	-1.64289	-0.421738	33	146
REGULATION OF PTEN STABILITY AND ACTIVITY%REACTOME DATABASE ID RELEASE 77%8948751	REGULATION OF PTEN STABILITY AND ACTIVITY%REACTOME DATABASE ID RELEASE 77%8948751	0.000275558	0.00632583	1	PSME4,PTEN,PSMF1,WWP2,PSMD9,PSME3,MKRN1,PSMD5,PSMA5,PSMB6,PSMD4,CSNK2B,PSMA1,XIAP,PSMA7,PSMB3,PSMB4,USP13,AKT3,UBA52	1.93797	0.525278	20	56
RIBOSOMAL SCANNING AND START CODON RECOGNITION%REACTOME%R-HSA-72702.3	RIBOSOMAL SCANNING AND START CODON RECOGNITION%REACTOME%R-HSA-72702.3	0.000279018	0.00632583	1	RPS4Y1,EIF3K,EIF3C,EIF5,RPS29,RPS10,EIF3E,EIF4G1,RPS14,EIF3B,RPS18,RPS16,RPS28,EIF2S2,EIF3I,RPS19,RPS2,EIF2S1,RPS20,RPS5,RPS11,FAU,EIF4E,RPS17,RPS8,EIF3M,EIF3A,RPS21,EIF3F,EIF3D,RPS15A,RPSA,RPS7,EIF3H,EIF4A2,EIF4B,RPS6,EIF4A1,RPS3,EIF3L	2.54142	0.687368	40	57
TRANSLATION INITIATION COMPLEX FORMATION%REACTOME%R-HSA-72649.3	TRANSLATION INITIATION COMPLEX FORMATION%REACTOME%R-HSA-72649.3	0.000279018	0.00632583	1	RPS4Y1,EIF3K,EIF3C,RPS29,RPS10,EIF3E,EIF4G1,RPS14,EIF3B,RPS18,RPS16,RPS28,EIF2S2,EIF3I,RPS19,RPS2,EIF2S1,RPS20,PABPC1,RPS5,RPS11,FAU,EIF4E,RPS17,RPS8,EIF3M,EIF3A,RPS21,EIF3F,EIF3D,RPS15A,RPSA,RPS7,EIF3H,EIF4A2,EIF4B,RPS6,EIF4A1,RPS3,EIF3L	2.53849	0.686575	40	57
ACTIVATION OF THE MRNA UPON BINDING OF THE CAP-BINDING COMPLEX AND EIFS, AND SUBSEQUENT BINDING TO 43S%REACTOME DATABASE ID RELEASE 77%72662	ACTIVATION OF THE MRNA UPON BINDING OF THE CAP-BINDING COMPLEX AND EIFS, AND SUBSEQUENT BINDING TO 43S%REACTOME DATABASE ID RELEASE 77%72662	0.000281452	0.00632583	1	RPS4Y1,EIF3K,EIF3C,RPS29,RPS10,EIF3E,EIF4G1,RPS14,EIF3B,RPS18,RPS16,RPS28,EIF2S2,EIF3I,RPS19,RPS2,EIF2S1,RPS20,PABPC1,RPS5,RPS11,FAU,EIF4E,RPS17,RPS8,EIF3M,EIF3A,RPS21,EIF3F,EIF3D,RPS15A,RPSA,RPS7,EIF3H,EIF4A2,EIF4B,RPS6,EIF4A1,RPS3,EIF3L	2.5387	0.684815	40	58
CDK-MEDIATED PHOSPHORYLATION AND REMOVAL OF CDC6%REACTOME%R-HSA-69017.2	CDK-MEDIATED PHOSPHORYLATION AND REMOVAL OF CDC6%REACTOME%R-HSA-69017.2	0.000281452	0.00632583	1	PSME4,UBE2S,PSMF1,UBE2D1,PSMD9,PSME3,UBE2E1,PSMD5,PSMA5,ANAPC5,PSMB6,PSMD4,CCNE1,PSMA1,ANAPC7,PSMA7,PSMB3,PSMB4,ANAPC1,UBA52,ANAPC4,PSMA6,CDK2,PSMD11	1.84011	0.496369	24	58
FCERI MEDIATED NF-KB ACTIVATION%REACTOME DATABASE ID RELEASE 77%2871837	FCERI MEDIATED NF-KB ACTIVATION%REACTOME DATABASE ID RELEASE 77%2871837	0.000282725	0.00632583	1	CDC34,PSME4,UBE2N,TRAF6,PSMF1,UBE2D1,PSMD9,PSME3,PSMD5,NFKB1,PSMA5,PSMB6,IKBKB,TAB2,PSMD4,PSMA1,PSMA7,UBE2V1,PSMB3,PSMB4,UBA52	1.93697	0.518452	21	60
EMBRYONIC MORPHOGENESIS%GOBP%GO:0048598	EMBRYONIC MORPHOGENESIS%GOBP%GO:0048598	0.000283246	0.00632583	-1	COL2A1,LAMB1,FBN2,COL6A1,FOLR1,ENG,LAMB3,LAMA3,FBN1,BMP7,EPHB2,MFAP2,GREM2,MYH3,FN1,MMP2,KDM2B,STRA6,MMP14,HDAC1,NKX2-5,VTN,CACNA1C,UGDH,MYO6,SETD2,SEMA4C,CTNNB1,ZNF281,FLRT3,IGF2,GPC3,HOXB4,COL4A2,NOG,CTR9,FGF2	-1.71474	-0.451758	37	119
DOWNSTREAM TCR SIGNALING%REACTOME DATABASE ID RELEASE 77%202424	DOWNSTREAM TCR SIGNALING%REACTOME DATABASE ID RELEASE 77%202424	0.000284738	0.00632583	1	CDC34,PIK3R1,PIK3CA,PSME4,UBE2N,PTEN,TRAF6,PSMF1,UBE2D1,PSMD9,PSME3,PSMD5,NFKB1,PSMA5,PSMB6,IKBKB,TAB2,PSMD4,PSMA1,PSMA7,UBE2V1,PSMB3,PSMB4,UBA52	2.25702	0.598639	24	63
BLOOD VESSEL DEVELOPMENT%GOBP%GO:0001568	BLOOD VESSEL DEVELOPMENT%GOBP%GO:0001568	0.00028551	0.00632583	-1	COL4A1,THY1,RECK,COL1A2,FOLR1,ENG,EGFL7,LAMA1,EPHB2,LOXL2,LRP1,NRP2,HEY2,COL1A1,BMPER,ATP7A,NCL,STRA6,NRP1,TGFBI,NKX2-5,CFC1,PLXND1,PDGFB,ADAMTS9,S1PR1,RNF213,CTNNB1,THBS1,GPC3,ROBO2,NOG,FGF2,ANGPTL2,RBPJ,JAM3,SERPINE1,AMOTL1,CAV1,TGFBR1,ITGB1BP1,PKNOX1,TDGF1P3,ANXA2	-1.76944	-0.4698	44	113
TGF-BETA SIGNALING PATHWAY%PANTHER PATHWAY%P00052	TGF-BETA SIGNALING PATHWAY%PANTHER PATHWAY%P00052	0.000291673	0.00632583	-1	NRAS,NRAS,NRAS,BMP10,BMP10,ATF2,ATF2,KRAS,KRAS,BMP7,BMP7,GDF15,GDF15,HRAS,HRAS,BMP1,BMP1,BMP1,JUN,JUN,RRAS2,RRAS2,DCP1A,DCP1A,FKBP1B,FKBP1B,FKBP1B,ZFYVE9,JUND,JUND,ALG5,TGFBR1,TGFBR1,LEFTY2,LEFTY2,INHBE,INHBE,EP300,EP300,RRAS,RRAS,GDF6,GDF6,TGFB1,TGFB1,BMP5,BMP5	-1.74877	-0.474023	47	98
TRANSMISSION ACROSS CHEMICAL SYNAPSES%REACTOME DATABASE ID RELEASE 77%112315	TRANSMISSION ACROSS CHEMICAL SYNAPSES%REACTOME DATABASE ID RELEASE 77%112315	0.000292013	0.00632583	-1	GNG5,COMT,NRAS,SLC6A4,CACNB2,EPB41L1,AKAP5,GNB4,LIN7C,CACNA2D3,ADCY9,GNAI3,CACNB3,DLG1,GNB1,SLC32A1,MAOA,GNAI2,HRAS,GLS,SNAP25,GNB2,MYO6,CAMK2B,GABBR1,NPTN	-1.77525	-0.483169	26	95
BLOOD VESSEL MORPHOGENESIS%GOBP%GO:0048514	BLOOD VESSEL MORPHOGENESIS%GOBP%GO:0048514	0.000292312	0.00632583	-1	COL4A1,THY1,RECK,FOLR1,ENG,EGFL7,LAMA1,EPHB2,LOXL2,LRP1,NRP2,HEY2,BMPER,NCL,STRA6,NRP1,TGFBI,NKX2-5,PLXND1,ADAMTS9,S1PR1,RNF213,CTNNB1,THBS1,NOG,FGF2,ANGPTL2,RBPJ,JAM3,SERPINE1,AMOTL1,CAV1,TGFBR1,ITGB1BP1,PKNOX1,ANXA2,SIRT1,ITGA5,TBX20,CDH2,TGFB1,ID1	-1.72211	-0.4664	42	99
INTERLEUKIN-1 SIGNALING%REACTOME%R-HSA-9020702.2	INTERLEUKIN-1 SIGNALING%REACTOME%R-HSA-9020702.2	0.000295072	0.00632583	1	PSME4,UBE2N,TRAF6,SQSTM1,PSMF1,TNIP2,IRAK1,PSMD9,PSME3,NKIRAS2,PSMD5,NFKB1,PSMA5,TOLLIP,PSMB6,IKBKB,TAB2,NKIRAS1,PSMD4,PSMA1,PSMA7,UBE2V1,PSMB3,PSMB4,UBA52	2.00863	0.525467	25	69
REGULATION OF MRNA STABILITY BY PROTEINS THAT BIND AU-RICH ELEMENTS%REACTOME%R-HSA-450531.4	REGULATION OF MRNA STABILITY BY PROTEINS THAT BIND AU-RICH ELEMENTS%REACTOME%R-HSA-450531.4	0.000296824	0.00632583	1	TNPO1,HSPA8,PSME4,MAPKAPK2,EIF4G1,PSMF1,HSPB1,ANP32A,YWHAB,PABPC1,PSMD9,PSME3,PRKCA,PSMD5,PSMA5,PSMB6,PSMD4,PSMA1,EXOSC8,PSMA7,PSMB3,PSMB4,UBA52,MAPK14,ZFP36L1,ZFP36,PSMA6	1.8001	0.463771	27	74
MITOCHONDRIAL GENE EXPRESSION%GOBP%GO:0140053	MITOCHONDRIAL GENE EXPRESSION%GOBP%GO:0140053	0.000296912	0.00632583	1	MRPS2,MRPS11,MTRF1L,MRPS18B,MRPS14,MRPL51,MRPS18A,RPUSD4,MRPL23,PTCD3,GATB,MRPS16,TRMT61B,MRPS21,MRPS7,MRPS28,MRPL57,MTIF3,MRPS17,MRPS24,RARS2,SARS2,MRPS34,EARS2,HSD17B10,TBRG4,QRSL1,POLRMT,TEFM,MRPS12,FASTKD2,MRPS6,MTO1,TUFM,FOXO3,MRPL44,MRPS15,MRPL2,YARS2	1.81566	0.472625	39	71
TRANSPORT ALONG MICROTUBULE%GOBP%GO:0010970	TRANSPORT ALONG MICROTUBULE%GOBP%GO:0010970	0.000297	0.00632583	1	BICD2,HSPA8,PCM1,TRAK1,RHOT2,LRPPRC,HSPB1,DYNC1H1,ACTR10,TTC21B,AP3S2,AP3D1,DYNC1I1,CEP131,SPG11,IFT81,NDEL1,COPG1,FYCO1,AP3B1,NEFL,KIF13A,DCTN1,KIF1C,MAPK8IP3,IFT57,PAFAH1B1,KIF1B,BLOC1S4,AP3S1,IFT140,BICD1,DYNC1I2,NDE1,WDR19,PEX14	1.8786	0.482907	36	75
TCR SIGNALING%REACTOME%R-HSA-202403.5	TCR SIGNALING%REACTOME%R-HSA-202403.5	0.000298063	0.00632583	1	CDC34,PIK3R1,PIK3CA,PSME4,UBE2N,VASP,PTEN,TRAF6,PSMF1,CSK,UBE2D1,EVL,PSMD9,PSME3,PSMD5,NFKB1,PSMA5,PAG1,PSMB6,IKBKB,TAB2,PSMD4,PSMA1,PSMA7,UBE2V1,PSMB3,PSMB4,UBA52	2.11924	0.547996	28	73
TRANSPORT OF MATURE TRANSCRIPT TO CYTOPLASM%REACTOME%R-HSA-72202.2	TRANSPORT OF MATURE TRANSCRIPT TO CYTOPLASM%REACTOME%R-HSA-72202.2	0.000300888	0.00632583	-1	NUP85,AAAS,THOC2,RNPS1,TPR,NUP35,NUP62,SRSF9,CPSF2,NUP153,NUP54,FIP1L1,THOC1,SRSF4,THOC6,CPSF4,NUP50,NUP155,RANBP2,SRSF11,SLBP,RAE1,ZC3H11A,SRRM1,NUP88,SARNP,THOC5,NUP160,NCBP1,NCBP2,SRSF1,GLE1,NUP210,NUP107,SRSF5,NDC1,DDX39A	-1.86088	-0.527656	37	73
HALLMARK_HYPOXIA%MSIGDB_C2%HALLMARK_HYPOXIA	HALLMARK_HYPOXIA%MSIGDB_C2%HALLMARK_HYPOXIA	0.000301432	0.00632583	-1	STC1,GPC1,HK2,ENO2,SLC2A3,AK4,PLAUR,P4HA1,DCN,PDK3,ZNF292,ATP7A,AKAP12,ANGPTL4,SDC3,TGFBI,PFKL,CYR61,JUN,SRPX,PYGM,KDM3A,STC2,TPST2,HS3ST1,PGM2,ANKZF1,GPC3,RBPJ,STBD1,TPD52,SERPINE1,CDKN1B,ALDOC,GPC4,SLC25A1,P4HA2,ANXA2	-1.8477	-0.522118	38	75
POSITIVE REGULATION OF TRANSLATION%GOBP%GO:0045727	POSITIVE REGULATION OF TRANSLATION%GOBP%GO:0045727	0.000302572	0.00632583	1	HABP4,EEF2,SAMD4A,LARP4B,TRUB2,YTHDF3,EIF5A,EIF3C,EIF3E,YTHDF2,EIF4G1,RPUSD4,FXR2,LARP4,METTL5,NCK2,LARP1,NGRN,RBM3,AGO2,EIF2B5,COA3,CNBP,RPL26,EIF3D,MTOR,EIF6,USP16,C1QBP	2.05827	0.524419	29	79
SELENOCYSTEINE SYNTHESIS%REACTOME DATABASE ID RELEASE 77%2408557	SELENOCYSTEINE SYNTHESIS%REACTOME DATABASE ID RELEASE 77%2408557	0.000303951	0.00632583	1	RPS4Y1,RPL37,RPS29,RPS10,RPS14,RPL36AL,RPS18,RPS16,RPLP1,RPS28,RPL36,RPL27,RPL36A,RPS19,RPS2,RPL23,RPS20,RPL19,RPS5,RPL17,RPL10A,RPL11,RPS11,RPL4,FAU,RPL38,RPS17,RPL3,RPS8,RPL12,RPL26,RPS21,RPL13,RPL15,RPL7,RPS15A,RPSA,RPL8,RPS7,RPL18,RPL27A,RPL32,RPS6,UBA52,RPL30,RPL37A,RPS3	2.53079	0.638523	47	82
PEPTIDE CHAIN ELONGATION%REACTOME DATABASE ID RELEASE 77%156902	PEPTIDE CHAIN ELONGATION%REACTOME DATABASE ID RELEASE 77%156902	0.000304044	0.00632583	1	RPS4Y1,EEF2,RPL37,RPS29,RPS10,RPS14,RPL36AL,RPS18,RPS16,RPLP1,RPS28,RPL36,RPL27,RPL36A,RPS19,RPS2,RPL23,RPS20,RPL19,RPS5,RPL17,RPL10A,RPL11,RPS11,RPL4,FAU,RPL38,RPS17,RPL3,RPS8,RPL12,RPL26,RPS21,RPL13,RPL15,RPL7,RPS15A,RPSA,RPL8,RPS7,RPL18,RPL27A,RPL32,RPS6,UBA52,RPL30,RPL37A,RPS3	2.55698	0.650201	48	80
INTERLEUKIN-1 FAMILY SIGNALING%REACTOME%R-HSA-446652.7	INTERLEUKIN-1 FAMILY SIGNALING%REACTOME%R-HSA-446652.7	0.000304229	0.00632583	1	PSME4,UBE2N,PTPN11,TRAF6,SQSTM1,PSMF1,PTPN23,TNIP2,IRAK1,PSMD9,PSME3,NKIRAS2,PSMD5,NFKB1,PSMA5,TOLLIP,PSMB6,IKBKB,TAB2,NKIRAS1,SMAD3,PTPN12,PSMD4,PSMA1,PSMA7,UBE2V1,PSMB3,PSMB4,UBA52	1.91969	0.486521	29	81
VIRAL MRNA TRANSLATION%REACTOME DATABASE ID RELEASE 77%192823	VIRAL MRNA TRANSLATION%REACTOME DATABASE ID RELEASE 77%192823	0.000304229	0.00632583	1	RPS4Y1,RPL37,RPS29,RPS10,RPS14,RPL36AL,RPS18,RPS16,RPLP1,RPS28,RPL36,RPL27,RPL36A,RPS19,RPS2,RPL23,RPS20,RPL19,GRSF1,RPS5,RPL17,RPL10A,RPL11,RPS11,RPL4,FAU,RPL38,RPS17,RPL3,RPS8,RPL12,RPL26,RPS21,RPL13,RPL15,RPL7,RPS15A,RPSA,RPL8,RPS7,RPL18,RPL27A,RPL32,RPS6,UBA52,RPL30,RPL37A,RPS3	2.51411	0.637167	48	81
EUKARYOTIC TRANSLATION ELONGATION%REACTOME%R-HSA-156842.2	EUKARYOTIC TRANSLATION ELONGATION%REACTOME%R-HSA-156842.2	0.000307031	0.00632583	1	RPS4Y1,EEF2,EEF1A2,RPL37,RPS29,RPS10,RPS14,EEF1D,RPL36AL,RPS18,RPS16,RPLP1,RPS28,RPL36,RPL27,RPL36A,RPS19,RPS2,RPL23,RPS20,RPL19,RPS5,RPL17,RPL10A,RPL11,RPS11,RPL4,FAU,RPL38,RPS17,RPL3,RPS8,EEF1A1P5,RPL12,RPL26,RPS21,RPL13,RPL15,RPL7,EEF1G,RPS15A,RPSA,RPL8,RPS7,RPL18,RPL27A,RPL32,RPS6,UBA52,RPL30,RPL37A,RPS3	2.62143	0.657374	52	85
EUKARYOTIC TRANSLATION TERMINATION%REACTOME%R-HSA-72764.4	EUKARYOTIC TRANSLATION TERMINATION%REACTOME%R-HSA-72764.4	0.000307031	0.00632583	1	RPS4Y1,RPL37,RPS29,RPS10,RPS14,RPL36AL,RPS18,RPS16,RPLP1,APEH,RPS28,RPL36,RPL27,RPL36A,RPS19,RPS2,RPL23,GSPT1,RPS20,RPL19,N6AMT1,RPS5,RPL17,RPL10A,RPL11,RPS11,RPL4,FAU,TRMT112,RPL38,RPS17,RPL3,RPS8,ETF1,RPL12,RPL26,RPS21,GSPT2,RPL13,RPL15,RPL7,RPS15A,RPSA,RPL8,RPS7,RPL18,RPL27A,RPL32,RPS6,UBA52,RPL30,RPL37A,RPS3	2.6233	0.657845	53	85
RESPONSE OF EIF2AK4 (GCN2) TO AMINO ACID DEFICIENCY%REACTOME%R-HSA-9633012.2	RESPONSE OF EIF2AK4 (GCN2) TO AMINO ACID DEFICIENCY%REACTOME%R-HSA-9633012.2	0.000310078	0.00632583	1	RPS4Y1,RPL37,RPS29,CEBPG,RPS10,RPS14,RPL36AL,RPS18,RPS16,RPLP1,RPS28,RPL36,ATF3,RPL27,EIF2S2,RPL36A,RPS19,RPS2,EIF2S1,RPL23,RPS20,RPL19,RPS5,RPL17,RPL10A,RPL11,RPS11,RPL4,FAU,RPL38,RPS17,RPL3,RPS8,RPL12,RPL26,RPS21,RPL13,RPL15,RPL7,RPS15A,RPSA,RPL8,RPS7,RPL18,RPL27A,RPL32,RPS6,UBA52,RPL30,RPL37A,RPS3	2.409	0.600628	51	88
MITOCHONDRIAL TRANSLATION INITIATION%REACTOME%R-HSA-5368286.1	MITOCHONDRIAL TRANSLATION INITIATION%REACTOME%R-HSA-5368286.1	0.00031027	0.00632583	1	MRPS2,MRPS23,MRPL41,MRPS11,CHCHD1,MRPS18B,MRPS14,MRPL51,MRPS18A,MRPL23,PTCD3,MRPL50,MRPS26,DAP3,MRPS16,MRPS9,MRPS22,MRPL54,MRPS21,MRPS7,MRPS5,MRPL14,AURKAIP1,MRPS28,MRPL57,MTIF3,MRPS30,MRPL36,MRPS17,MRPS25,MRPS24,MRPS33,MRPL43,MRPL38,MRPL45,MRPS34,MRPL28,ERAL1,MRPS31,MRPL27,MRPL11,MRPL21,MRPL17,MTFMT,MRPL18,MRPS12,MRPS6,MRPL33,MRPL44,MRPS15,MRPL53,MRPL2,MRPL9,MRPL34,MRPL19,MRPL39,MRPL13,MRPL16,MR…	2.5119	0.627899	59	87
NONSENSE MEDIATED DECAY (NMD) INDEPENDENT OF THE EXON JUNCTION COMPLEX (EJC)%REACTOME%R-HSA-975956.1	NONSENSE MEDIATED DECAY (NMD) INDEPENDENT OF THE EXON JUNCTION COMPLEX (EJC)%REACTOME%R-HSA-975956.1	0.00031027	0.00632583	1	RPS4Y1,RPL37,RPS29,RPS10,EIF4G1,RPS14,RPL36AL,RPS18,RPS16,RPLP1,RPS28,RPL36,RPL27,RPL36A,RPS19,RPS2,RPL23,GSPT1,RPS20,RPL19,PABPC1,RPS5,RPL17,RPL10A,RPL11,RPS11,RPL4,FAU,RPL38,RPS17,RPL3,RPS8,UPF1,ETF1,RPL12,RPL26,RPS21,GSPT2,RPL13,RPL15,RPL7,RPS15A,RPSA,RPL8,RPS7,RPL18,RPL27A,RPL32,RPS6,UBA52,RPL30,RPL37A,RPS3	2.57238	0.643019	53	87
MITOCHONDRIAL TRANSLATION TERMINATION%REACTOME DATABASE ID RELEASE 77%5419276	MITOCHONDRIAL TRANSLATION TERMINATION%REACTOME DATABASE ID RELEASE 77%5419276	0.00031027	0.00632583	1	MRPS2,MRPS23,MRPL41,MRPS11,MTRF1L,CHCHD1,MRPS18B,MRPS14,MRPL51,MRPS18A,MRPL23,PTCD3,MRPL50,MRPS26,DAP3,MRPS16,MRPS9,MRPS22,MRPL54,MRPS21,MRPS7,MRPS5,MRPL14,AURKAIP1,MRPS28,MRPL57,MRPS30,MRPL36,MRPS17,MRPS25,MRPS24,MRPS33,MRPL43,MRPL38,MRPL45,MRPS34,MRPL28,ERAL1,MRPS31,MRRF,MRPL27,MRPL11,MRPL21,MRPL17,MRPL18,MRPS12,MRPS6,MRPL33,MRPL44,MRPS15,MRPL53,MRPL2,MRPL9,MRPL34,MRPL19,MRPL39,MRPL13,MRPL16,MR…	2.47503	0.618683	59	87
MITOCHONDRIAL TRANSLATION ELONGATION%REACTOME DATABASE ID RELEASE 77%5389840	MITOCHONDRIAL TRANSLATION ELONGATION%REACTOME DATABASE ID RELEASE 77%5389840	0.00031027	0.00632583	1	MRPS2,MRPS23,MRPL41,MRPS11,CHCHD1,MRPS18B,MRPS14,MRPL51,MRPS18A,MRPL23,PTCD3,MRPL50,MRPS26,DAP3,MRPS16,MRPS9,MRPS22,MRPL54,MRPS21,MRPS7,MRPS5,MRPL14,AURKAIP1,MRPS28,MRPL57,MRPS30,MRPL36,MRPS17,MRPS25,MRPS24,MRPS33,MRPL43,MRPL38,MRPL45,MRPS34,MRPL28,ERAL1,MRPS31,MRPL27,MRPL11,MRPL21,MRPL17,MRPL18,MRPS12,MRPS6,MRPL33,TUFM,MRPL44,MRPS15,MRPL53,MRPL2,MRPL9,MRPL34,MRPL19,MRPL39,MRPL13,MRPL16,MRPL35	2.49164	0.622836	58	87
UBIQUITIN PROTEASOME PATHWAY%PANTHER PATHWAY%P00060	UBIQUITIN PROTEASOME PATHWAY%PANTHER PATHWAY%P00060	0.000311139	0.00632583	1	UBE2N,UBE2N,UBE2S,UBE2S,UBE2D3,UBE2D3,UBE2D3,SMURF2,SMURF2,SMURF2,UBE2G1,UBE2G1,UBE2G1,UBE2D1,UBE2D1,WWP2,WWP2,ITCH,ITCH,UBE2E1,UBE2E1,ATG7,ATG7,UBE3C,UBE3C,EIF3F,UBA3,UBA3,UBA3,PSMD4,PSMD4,UBE2K,UBE2K	1.97064	0.490515	33	89
MACROAUTOPHAGY%REACTOME%R-HSA-1632852.8	MACROAUTOPHAGY%REACTOME%R-HSA-1632852.8	0.000312989	0.00632583	1	MAP1LC3B,HSPA8,ATG101,MTMR3,MFN2,UBE2N,PARK7,RRAGC,TSC2,RB1CC1,CHMP7,CHMP3,ATG5,RRAGA,MFN1,SQSTM1,MTERF3,DYNC1H1,HSP90AA1,VDAC1,LAMTOR3,WIPI1,ATG16L1,DYNC1I1,WDR45,RPTOR,LAMTOR1,MTMR14,VCP,ATG14,ATG7,TOMM7,MTOR,ATG9A,PIK3R4,CSNK2B,GABARAPL2,UBE2V1,USP30,TOMM22,UBA52,ATG12,TOMM40,CHMP4B,HSF1,UVRAG,DYNC1I2,DYNC1LI1,ATG3,PCNT,PLIN3,PRKAA2,RHEB,CSNK2A1,PRKAA1,WIPI2,TSC1	2.21163	0.548628	57	91
MITOCHONDRIAL TRANSLATION%REACTOME%R-HSA-5368287.1	MITOCHONDRIAL TRANSLATION%REACTOME%R-HSA-5368287.1	0.00031506	0.00632583	1	MRPS2,MRPS23,MRPL41,MRPS11,MTRF1L,CHCHD1,MRPS18B,MRPS14,MRPL51,MRPS18A,MRPL23,PTCD3,MRPL50,MRPS26,DAP3,MRPS16,MRPS9,MRPS22,MRPL54,MRPS21,MRPS7,MRPS5,MRPL14,AURKAIP1,MRPS28,MRPL57,MTIF3,MRPS30,MRPL36,MRPS17,MRPS25,MRPS24,MRPS33,MRPL43,MRPL38,MRPL45,MRPS34,MRPL28,ERAL1,MRPS31,MRRF,MRPL27,MRPL11,MRPL21,MRPL17,MTFMT,MRPL18,MRPS12,MRPS6,MRPL33,TUFM,MRPL44,MRPS15,MRPL53,MRPL2,MRPL9,MRPL34,MRPL19,MRPL39…	2.45783	0.608171	62	93
FORMATION OF A POOL OF FREE 40S SUBUNITS%REACTOME DATABASE ID RELEASE 77%72689	FORMATION OF A POOL OF FREE 40S SUBUNITS%REACTOME DATABASE ID RELEASE 77%72689	0.00031506	0.00632583	1	RPS4Y1,EIF3K,RPL37,EIF3C,RPS29,RPS10,EIF3E,RPS14,RPL36AL,EIF3B,RPS18,RPS16,RPLP1,RPS28,RPL36,RPL27,RPL36A,EIF3I,RPS19,RPS2,RPL23,RPS20,RPL19,RPS5,RPL17,RPL10A,RPL11,RPS11,RPL4,FAU,RPL38,RPS17,RPL3,RPS8,EIF3M,EIF3A,RPL12,RPL26,RPS21,EIF3F,RPL13,EIF3D,RPL15,RPL7,RPS15A,RPSA,RPL8,RPS7,EIF3H,RPL18,RPL27A,RPL32,RPS6,UBA52,RPL30,RPL37A,RPS3,EIF3L	2.63993	0.65323	58	93
MEMBRANE DOCKING%GOBP%GO:0022406	MEMBRANE DOCKING%GOBP%GO:0022406	0.000315308	0.00632583	-1	AHCYL1,VAMP8,STXBP2,ICAM1,STXBP1,STXBP3,STX1B,STX3,RAB13,STX17,STX2,SNAP25,RAB8B,VAPB,RAB10,CHP1,STX4,PDZD8,RAB8A	-1.83044	-0.548295	19	54
SELENOAMINO ACID METABOLISM%REACTOME DATABASE ID RELEASE 77%2408522	SELENOAMINO ACID METABOLISM%REACTOME DATABASE ID RELEASE 77%2408522	0.000316656	0.00632583	1	RPS4Y1,RPL37,CBS,RPS29,RPS10,RPS14,RPL36AL,RPS18,RPS16,RPLP1,RPS28,RPL36,RPL27,RPL36A,RPS19,RPS2,RPL23,RPS20,RPL19,RPS5,RPL17,RPL10A,RPL11,RPS11,AIMP2,RPL4,FAU,RPL38,RPS17,RPL3,RPS8,RPL12,RPL26,RPS21,RPL13,RPL15,RPL7,RPS15A,AHCY,RPSA,RPL8,RPS7,TXNRD1,RPL18,RPL27A,RPL32,RPS6,UBA52,SCLY,RPL30,RPL37A,RPS3	2.3052	0.569491	52	94
SUMOYLATION OF CHROMATIN ORGANIZATION PROTEINS%REACTOME DATABASE ID RELEASE 77%4551638	SUMOYLATION OF CHROMATIN ORGANIZATION PROTEINS%REACTOME DATABASE ID RELEASE 77%4551638	0.000317158	0.00632583	-1	NUP85,AAAS,HDAC1,TPR,CBX8,NUP35,NUP62,CBX5,NUP153,NUP54,NUP50,NUP155,RANBP2,SUZ12,RAE1,BMI1,PHC2,ZBED1,NUP88,RING1,SUMO2,NUP160,NUP210,NUP107,SUMO1,NDC1	-1.89135	-0.583619	26	45
MULTICELLULAR ORGANISMAL SIGNALING%GOBP%GO:0035637	MULTICELLULAR ORGANISMAL SIGNALING%GOBP%GO:0035637	0.000317158	0.00632583	-1	DSG2,ATP1A2,CACNB2,DSC2,ATP1B1,ATP1A1,SLC9A1,DSP,ATP1B2,CTNNA3,JUP,ANK3,CXADR,CACNA1C,KCNQ1,FKBP1B,CACNA2D1,CNTNAP1,CAV1	-1.87847	-0.579646	19	45
AUTOPHAGY%REACTOME%R-HSA-9612973.2	AUTOPHAGY%REACTOME%R-HSA-9612973.2	0.000319591	0.00632583	1	MAP1LC3B,HSPA8,ATG101,MTMR3,MFN2,UBE2N,PARK7,RRAGC,TSC2,RB1CC1,CHMP7,CHMP3,ATG5,RRAGA,MFN1,SQSTM1,MTERF3,DYNC1H1,HSP90AA1,VDAC1,VPS37C,LAMTOR3,WIPI1,ATG16L1,DYNC1I1,WDR45,RPTOR,UBAP1,LAMTOR1,MTMR14,VCP,ATG14,ATG7,TOMM7,MTOR,ATG9A,PIK3R4,CSNK2B,VPS28,HSP90AB1,GABARAPL2,UBE2V1,USP30,TOMM22,TSG101,UBA52,ATG12,TOMM40,CHMP4B,HSF1,UVRAG,DYNC1I2,DYNC1LI1,MVB12B,ATG3,PCNT,PLIN3,PRKAA2,RHEB,CSNK2A1,PRKAA1…	2.22909	0.544313	63	100
CYTOPLASMIC TRANSLATION%GOBP%GO:0002181	CYTOPLASMIC TRANSLATION%GOBP%GO:0002181	0.000319591	0.00632583	1	RPL37,EIF5,RPS29,RPS10,EIF4G1,EIF2B3,RPS14,DRG1,RPS18,RPS16,DRG2,RPLP1,RPS28,RPL36,RPL27,EIF2S2,RPL36A,EIF3I,RPS19,RPS2,RPL23,GSPT1,RPS20,RPL19,RPS5,RPL17,RPL10A,RPL11,RPS11,RPL4,RPL38,RPS17,RPL3,RPS8,ETF1,EIF3M,EIF3A,RPL12,RPL26,RPS21,GSPT2,RPL13,EIF3D,RPL15,RPL7,ZC3H15,RPS15A,RPSA,RPL8,RPS7,MCTS1,RPL18,EIF4A2,RPL27A,RPL32,EIF4B,RPS6,EIF4A1,UBA52,RPL30,DENR,RPL37A,RPS3	2.68263	0.655062	63	100
SRP-DEPENDENT COTRANSLATIONAL PROTEIN TARGETING TO MEMBRANE%REACTOME%R-HSA-1799339.2	SRP-DEPENDENT COTRANSLATIONAL PROTEIN TARGETING TO MEMBRANE%REACTOME%R-HSA-1799339.2	0.000320205	0.00632583	1	RPS4Y1,RPL37,RPS29,RPS10,RPS14,RPL36AL,RPS18,RPS16,RPLP1,RPS28,RPL36,RPL27,RPL36A,RPS19,RPS2,RPL23,RPS20,RPL19,RPS5,RPL17,RPL10A,RPL11,RPS11,RPL4,FAU,RPL38,RPS17,RPL3,RPS8,RPL12,RPL26,RPS21,RPL13,RPL15,RPL7,SRP54,RPS15A,RPSA,RPL8,RPS7,RPL18,RPL27A,RPL32,RPS6,UBA52,RPL30,RPL37A,RPS3,RPL21,SRP72,RPL31,RPL10	2.2147	0.540128	52	101
L13A-MEDIATED TRANSLATIONAL SILENCING OF CERULOPLASMIN EXPRESSION%REACTOME DATABASE ID RELEASE 77%156827	L13A-MEDIATED TRANSLATIONAL SILENCING OF CERULOPLASMIN EXPRESSION%REACTOME DATABASE ID RELEASE 77%156827	0.000324675	0.00632583	1	RPS4Y1,EIF3K,RPL37,EIF3C,RPS29,RPS10,EIF3E,EIF4G1,RPS14,RPL36AL,EIF3B,RPS18,RPS16,RPLP1,RPS28,RPL36,RPL27,EIF2S2,RPL36A,EIF3I,RPS19,RPS2,EIF2S1,RPL23,RPS20,RPL19,PABPC1,RPS5,RPL17,RPL10A,RPL11,RPS11,RPL4,FAU,EIF4E,RPL38,RPS17,RPL3,RPS8,EIF3M,EIF3A,RPL12,RPL26,RPS21,EIF3F,RPL13,EIF3D,RPL15,RPL7,RPS15A,RPSA,RPL8,RPS7,EIF3H,RPL18,EIF4A2,RPL27A,RPL32,EIF4B,RPS6,EIF4A1,UBA52,RPL30,RPL37A,RPS3,EIF3L	2.70387	0.657746	66	103
O-LINKED GLYCOSYLATION%REACTOME DATABASE ID RELEASE 77%5173105	O-LINKED GLYCOSYLATION%REACTOME DATABASE ID RELEASE 77%5173105	0.000325839	0.00632583	-1	ADAMTSL4,ADAMTS7,ADAMTS3,ADAMTSL1,ADAMTS6,THSD4,ST3GAL4,ADAMTS19,ADAMTS9,ADAMTS1,THBS1,ADAMTS14,B4GAT1,ADAMTS15,ST3GAL1,POMGNT2,ADAMTS12,DAG1	-1.87977	-0.603506	18	37
GTP HYDROLYSIS AND JOINING OF THE 60S RIBOSOMAL SUBUNIT%REACTOME%R-HSA-72706.2	GTP HYDROLYSIS AND JOINING OF THE 60S RIBOSOMAL SUBUNIT%REACTOME%R-HSA-72706.2	0.000326904	0.00632583	1	RPS4Y1,EIF3K,RPL37,EIF3C,EIF5,RPS29,EIF5B,RPS10,EIF3E,EIF4G1,RPS14,RPL36AL,EIF3B,RPS18,RPS16,RPLP1,RPS28,RPL36,RPL27,EIF2S2,RPL36A,EIF3I,RPS19,RPS2,EIF2S1,RPL23,RPS20,RPL19,RPS5,RPL17,RPL10A,RPL11,RPS11,RPL4,FAU,EIF4E,RPL38,RPS17,RPL3,RPS8,EIF3M,EIF3A,RPL12,RPL26,RPS21,EIF3F,RPL13,EIF3D,RPL15,RPL7,RPS15A,RPSA,RPL8,RPS7,EIF3H,RPL18,EIF4A2,RPL27A,RPL32,EIF4B,RPS6,EIF4A1,UBA52,RPL30,RPL37A,RPS3,EIF3L	2.72044	0.660518	67	104
NONSENSE-MEDIATED DECAY (NMD)%REACTOME%R-HSA-927802.2	NONSENSE-MEDIATED DECAY (NMD)%REACTOME%R-HSA-927802.2	0.000326904	0.00632583	1	RPS4Y1,RPL37,RPS29,RPS10,EIF4G1,RPS14,RPL36AL,RPS18,RPS16,RPLP1,PPP2R1A,RPS28,RPL36,RPL27,RPL36A,RPS19,RPS2,RPL23,GSPT1,RPS20,RPL19,PABPC1,RPS5,RPL17,RPL10A,RPL11,RPS11,RPL4,FAU,RPL38,RPS17,RPL3,SMG9,RPS8,UPF1,ETF1,RPL12,RPL26,RPS21,GSPT2,CASC3,RPL13,RPL15,RPL7,SMG6,RPS15A,RPSA,RPL8,RPS7,RPL18,RPL27A,RPL32,RPS6,UBA52,RPL30,UPF2,RPL37A,RPS3,UPF3B	2.44522	0.593695	59	104
NONSENSE MEDIATED DECAY (NMD) ENHANCED BY THE EXON JUNCTION COMPLEX (EJC)%REACTOME%R-HSA-975957.1	NONSENSE MEDIATED DECAY (NMD) ENHANCED BY THE EXON JUNCTION COMPLEX (EJC)%REACTOME%R-HSA-975957.1	0.000326904	0.00632583	1	RPS4Y1,RPL37,RPS29,RPS10,EIF4G1,RPS14,RPL36AL,RPS18,RPS16,RPLP1,PPP2R1A,RPS28,RPL36,RPL27,RPL36A,RPS19,RPS2,RPL23,GSPT1,RPS20,RPL19,PABPC1,RPS5,RPL17,RPL10A,RPL11,RPS11,RPL4,FAU,RPL38,RPS17,RPL3,SMG9,RPS8,UPF1,ETF1,RPL12,RPL26,RPS21,GSPT2,CASC3,RPL13,RPL15,RPL7,SMG6,RPS15A,RPSA,RPL8,RPS7,RPL18,RPL27A,RPL32,RPS6,UBA52,RPL30,UPF2,RPL37A,RPS3,UPF3B	2.44522	0.593695	59	104
POSITIVE REGULATION OF CALCIUM ION TRANSPORT%GOBP%GO:0051928	POSITIVE REGULATION OF CALCIUM ION TRANSPORT%GOBP%GO:0051928	0.000327386	0.00632583	-1	STC1,THY1,CACNB2,ATP2B1,ATP1B1,SLC9A1,WFS1,CACNB3,P2RX4,PDGFB	-1.89657	-0.623399	10	33
NEUROTRANSMITTER TRANSPORT%GOBP%GO:0006836	NEUROTRANSMITTER TRANSPORT%GOBP%GO:0006836	0.000329327	0.00632583	-1	SLC6A4,ATP1A2,STXBP2,STXBP1,LIN7C,STXBP3,STX1B,STX3,SLC32A1,PIP5K1C,PDZD11,STX2,SNAP25,SNAP23,STX4,LIN7A,SLC1A3,PCLO,SYT7	-1.90117	-0.630239	19	32
CAP-DEPENDENT TRANSLATION INITIATION%REACTOME%R-HSA-72737.2	CAP-DEPENDENT TRANSLATION INITIATION%REACTOME%R-HSA-72737.2	0.000332005	0.00632583	1	RPS4Y1,EIF3K,RPL37,EIF3C,EIF5,RPS29,EIF5B,RPS10,EIF3E,EIF4G1,EIF2B3,RPS14,RPL36AL,EIF3B,RPS18,RPS16,RPLP1,RPS28,RPL36,RPL27,EIF2S2,RPL36A,EIF3I,RPS19,RPS2,EIF2S1,RPL23,EIF2B4,RPS20,RPL19,PABPC1,RPS5,RPL17,RPL10A,RPL11,RPS11,RPL4,FAU,EIF4E,RPL38,RPS17,EIF2B5,RPL3,RPS8,EIF3M,EIF3A,RPL12,RPL26,RPS21,EIF3F,RPL13,EIF3D,RPL15,RPL7,RPS15A,RPSA,RPL8,RPS7,EIF3H,RPL18,EIF4A2,RPL27A,RPL32,EIF4B,RPS6,EIF4A1,…	2.74934	0.660943	72	111
EUKARYOTIC TRANSLATION INITIATION%REACTOME DATABASE ID RELEASE 77%72613	EUKARYOTIC TRANSLATION INITIATION%REACTOME DATABASE ID RELEASE 77%72613	0.000332005	0.00632583	1	RPS4Y1,EIF3K,RPL37,EIF3C,EIF5,RPS29,EIF5B,RPS10,EIF3E,EIF4G1,EIF2B3,RPS14,RPL36AL,EIF3B,RPS18,RPS16,RPLP1,RPS28,RPL36,RPL27,EIF2S2,RPL36A,EIF3I,RPS19,RPS2,EIF2S1,RPL23,EIF2B4,RPS20,RPL19,PABPC1,RPS5,RPL17,RPL10A,RPL11,RPS11,RPL4,FAU,EIF4E,RPL38,RPS17,EIF2B5,RPL3,RPS8,EIF3M,EIF3A,RPL12,RPL26,RPS21,EIF3F,RPL13,EIF3D,RPL15,RPL7,RPS15A,RPSA,RPL8,RPS7,EIF3H,RPL18,EIF4A2,RPL27A,RPL32,EIF4B,RPS6,EIF4A1,…	2.74934	0.660943	72	111
UB-SPECIFIC PROCESSING PROTEASES%REACTOME DATABASE ID RELEASE 77%5689880	UB-SPECIFIC PROCESSING PROTEASES%REACTOME DATABASE ID RELEASE 77%5689880	0.000333667	0.00632678	1	PSME4,PTEN,SNX3,SIAH2,RNF123,TADA3,TRAF6,SMURF2,ARRB1,PSMF1,VDAC1,SMAD2,PSMD9,OTUB1,USP5,PSME3,TAF9B,USP33,PSMD5,PSMA5,MAT2B,USP15,USP25,PSMB6,USP4,USP24,SMAD3,USP47,HGS,USP16,KEAP1,PSMD4,VDAC3,PSMA1,PSMA7,USP30,SMAD4,PSMB3,TADA2B,PSMB4,USP19,IDE,USP13,USP10,UBA52,TRRAP	2.03939	0.488616	46	113
S1P3 PATHWAY%PATHWAY INTERACTION DATABASE NCI-NATURE CURATED DATA%S1P3 PATHWAY	S1P3 PATHWAY%PATHWAY INTERACTION DATABASE NCI-NATURE CURATED DATA%S1P3 PATHWAY	0.000340426	0.00639316	-1	GNAZ,GNAQ,GNA12,GNAI3,GNAI2,PDGFB,GNA14,RHOA,RAC1,GNA11,SRC,GNA13,GNAI1	-1.93031	-0.718097	13	19
REGULATION OF COAGULATION%GOBP%GO:0050818	REGULATION OF COAGULATION%GOBP%GO:0050818	0.000340426	0.00639316	-1	ANO6,EPHB2,CD9,ST3GAL4,VTN,PDGFB,SERPINE2,PRKCD,THBS1,FGG,SERPINE1,CAV1,PROCR,PLAT	-1.92639	-0.716639	14	19
CELLULAR RESPONSE TO STARVATION%REACTOME DATABASE ID RELEASE 77%9711097	CELLULAR RESPONSE TO STARVATION%REACTOME DATABASE ID RELEASE 77%9711097	0.000342114	0.00639428	1	RPS4Y1,RPL37,RPS29,CEBPG,RRAGC,RPS10,RRAGA,RPS14,RPL36AL,RPS18,RPS16,RPLP1,RPS28,RPL36,ATF3,RPL27,EIF2S2,RPL36A,RPS19,RPS2,EIF2S1,RPL23,RPS20,RPL19,LAMTOR3,RPS5,RPL17,RPL10A,RPL11,RPS11,RPL4,FAU,RPTOR,RPL38,RPS17,RPL3,LAMTOR1,RPS8,RPL12,RPL26,RPS21,RPL13,RPL15,MTOR,RPL7,RPS15A,RPSA,RPL8,RPS7,RPL18,RPL27A,RPL32,RPS6,UBA52,WDR24,RPL30,RPL37A,RPS3	2.20843	0.523981	58	120
NCAM1 INTERACTIONS%REACTOME DATABASE ID RELEASE 77%419037	NCAM1 INTERACTIONS%REACTOME DATABASE ID RELEASE 77%419037	0.000348311	0.00647924	-1	COL4A1,CACNB2,COL6A2,COL4A5,COL6A1,COL6A3,AGRN,CACNB3,CACNA1C,NCAM1,COL6A6,COL4A2	-2.08025	-0.816733	12	15
NEDDYLATION%REACTOME DATABASE ID RELEASE 77%8951664	NEDDYLATION%REACTOME DATABASE ID RELEASE 77%8951664	0.000355492	0.00658164	1	ASB2,KLHL21,FBXL22,COMMD6,PSME4,COMMD1,DCUN1D2,DCAF16,UBE2D3,COPS4,FEM1B,COMMD3,PSMF1,KLHL22,KLHL13,UBE2D1,DCAF8,COMMD8,BTBD1,FBXL7,COPS2,PSMD9,PSME3,PSMD5,FBXO30,PSMA5,DCAF6,FBXL4,DDB1,PSMB6,CCDC22,RNF7,UBA3,SENP8,KEAP1,PSMD4,CUL2,PSMA1,CUL3,COPS5,PSMA7,CCDC8,CUL9,COMMD4,COPS3,PSMB3,DCAF5,PSMB4,UCHL3,COMMD9,UBA52,ASB8,DCUN1D4,FBXL8,NEDD8,WDTC1,FBXL18,PUM2,PSMA6,DCAF10,COPS7B,KLHL41	2.00331	0.466936	62	138
REGULATION OF EXPRESSION OF SLITS AND ROBOS%REACTOME DATABASE ID RELEASE 77%9010553	REGULATION OF EXPRESSION OF SLITS AND ROBOS%REACTOME DATABASE ID RELEASE 77%9010553	0.000361011	0.00665243	1	RPS4Y1,PSME4,RPL37,RPS29,RPS10,EIF4G1,ZSWIM8,RPS14,RPL36AL,PSMF1,RPS18,RPS16,RPLP1,RPS28,RPL36,RPL27,RPL36A,RPS19,RPS2,RPL23,GSPT1,RPS20,RPL19,PABPC1,RPS5,PSMD9,PSME3,RPL17,RPL10A,RPL11,USP33,RPS11,RPL4,FAU,PSMD5,RPL38,RPS17,PSMA5,RPL3,RPS8,ETF1,RPL12,RPL26,RPS21,PSMB6,GSPT2,CASC3,RPL13,RPL15,RPL7,RPS15A,PSMD4,RPSA,CUL2,RPL8,RPS7,PSMA1,PSMA7,RPL18,PSMB3,RPL27A,PSMB4,RPL32,RPS6,UBA52,RPL30,UPF2,RP…	2.38363	0.552884	70	143
DEUBIQUITINATION%REACTOME DATABASE ID RELEASE 77%5688426	DEUBIQUITINATION%REACTOME DATABASE ID RELEASE 77%5688426	0.000387447	0.00707316	1	PSME4,PTEN,SNX3,SIAH2,RNF123,TADA3,TRAF6,SMURF2,ARRB1,PSMF1,TNIP2,UBE2D1,VDAC1,APC,SMAD2,PSMD9,OTUB1,USP5,PSME3,TAF9B,USP33,PSMD5,PSMA5,MAT2B,USP15,VCP,OGT,USP25,TRAF3,PSMB6,VCPIP1,USP4,USP24,OTUD7B,SMAD3,USP47,HGS,SENP8,USP16,KEAP1,PSMD4,VDAC3,PSMA1,UCHL1,PSMA7,ATXN3,USP30,SMAD4,PSMB3,TADA2B,PSMB4,USP19,IDE,USP13,UCHL3,USP10,UBA52,TRRAP	1.71247	0.392576	58	159
MAJOR PATHWAY OF RRNA PROCESSING IN THE NUCLEOLUS AND CYTOSOL%REACTOME%R-HSA-6791226.3	MAJOR PATHWAY OF RRNA PROCESSING IN THE NUCLEOLUS AND CYTOSOL%REACTOME%R-HSA-6791226.3	0.000387447	0.00707316	1	RPS4Y1,RPL37,RPS29,RPS10,RPS14,RPL36AL,RPS18,RPS16,RPLP1,RPS28,RPL36,RPL27,RPL36A,RPS19,RPS2,RPL23,RPS20,RPL19,RPS5,RPL17,RPL10A,RPL11,RPS11,RPL4,FAU,RPL38,RPS17,RPL3,RPS8,RIOK3,RPP38,RPL12,RPL26,RPS21,LTV1,RPP21,RPL13,RPL15,RPL7,RPS15A,RPSA,RPL8,RPS7,EXOSC8,NOB1,RPL18,RPL27A,RPL32,RPS6,UBA52,RPL30,RPL37A,RPS3,PNO1,RPL21,BOP1,CSNK1E,RPL31,RPL10,RRP36	1.66484	0.378438	60	166
POSITIVE REGULATION OF CELL MIGRATION%GOBP%GO:0030335	POSITIVE REGULATION OF CELL MIGRATION%GOBP%GO:0030335	0.000392773	0.00713719	-1	MOSPD2,LAMB1,THY1,CD99,ICAM1,LAMC2,SH3RF2,ANO6,ITGA6,ADAM17,EPHB2,ADAM10,MYO1C,NRP2,SRPX2,PODXL,TJP1,ROR2,FN1,COL1A1,ZNF609,SEMA4B,P2RX4,SP1,PIK3C2A,NRP1,WNT11,PAK1,MMP14,HRAS,SEMA4D,VTN,PDGFB,SEMA3C,ADAMTS1,SEMA4C,MAZ,IGFBP5,THBS1,PDGFC,RHOA,ADAM9,RDX,CIB1,FGF2,RAC1,JAM3,FAM83H,ARF6,SERPINE1,GAS6,SRC,RREB1,SDCBP,CAV1,TGFBR1,STX4,AGT,S100A11	-1.56469	-0.386776	59	203
CELL JUNCTION ORGANIZATION%GOBP%GO:0034330	CELL JUNCTION ORGANIZATION%GOBP%GO:0034330	0.000397667	0.00718459	-1	MARVELD2,DSG2,POF1B,THY1,CACNB2,LAMC1,EPB41L3,DSP,OCLN,ITGA6,JUP,FGF13,CDH1,EPHB2,AGRN,RAB13,CD9,SDF4,TJP1,CLDN6,PLEC,CACNB3,DLG1,FN1,CTNNA1,PKP3,ANK3,PCDHB14,PIP5K1A,CXADR,PIP5K1C,PLXND1,SDK2,NOS1AP,FARP1,LRRC4B,MPP7,CTNNB1,RAB8B,PTPRF,FLRT3,RHOA,JAM3,PKP4,SRC,CNTNAP1,LGI2,PLEKHA7,GPC4,ARVCF,ELFN1,PPFIBP2,PCLO,LSR,CAMSAP3,PTPRK,MPDZ,PSEN1,CYFIP1,ACTB,CTNND1,PKP2,CDC42	-1.55711	-0.389527	63	181
RRNA PROCESSING IN THE NUCLEUS AND CYTOSOL%REACTOME DATABASE ID RELEASE 77%8868773	RRNA PROCESSING IN THE NUCLEUS AND CYTOSOL%REACTOME DATABASE ID RELEASE 77%8868773	0.000399042	0.00718459	1	RPS4Y1,RPL37,RPS29,RPS10,RPS14,RPL36AL,RPS18,RPS16,RPLP1,RPS28,RPL36,RPL27,RPL36A,RPS19,RPS2,RPL23,RPS20,RPL19,RPS5,RPL17,RPL10A,RPL11,RPS11,RPL4,FAU,TRMT112,RPL38,RPS17,RPL3,RPS8,RIOK3,RPP38,RPL12,RPL26,RPS21,LTV1,RPP21,RPL13,RPL15,RPL7,RPS15A,RPSA,RPL8,RPS7,EXOSC8,NOB1,RPL18,RPL27A,RPL32,RPS6,UBA52,RPL30,RPL37A,RPS3,PNO1,RPL21,BOP1,CSNK1E,RPL31,RPL10,RRP36	1.59992	0.360796	61	176
SIGNALING BY ROBO RECEPTORS%REACTOME DATABASE ID RELEASE 77%376176	SIGNALING BY ROBO RECEPTORS%REACTOME DATABASE ID RELEASE 77%376176	0.000402414	0.00721222	1	RPS4Y1,NTN1,PSME4,RPL37,VASP,RPS29,RPS10,EIF4G1,SRGAP1,ZSWIM8,RPS14,RPL36AL,PSMF1,PFN1,RPS18,RPS16,RPLP1,RPS28,RPL36,RPL27,RPL36A,RPS19,RPS2,RPL23,NCK2,GSPT1,RPS20,RPL19,PABPC1,RPS5,EVL,PSMD9,PSME3,RPL17,RPL10A,RPL11,USP33,RPS11,PRKCA,RPL4,FAU,PSMD5,RPL38,RPS17,PSMA5,RPL3,RPS8,ETF1,CAP2,PPP3CB,RPL12,RPL26,RPS21,PSMB6,GSPT2,CASC3,RPL13,RPL15,RPL7,RPS15A,PSMD4,RPSA,SOS1,CUL2,RPL8,RPS7,PSMA1,PSMA7,P…	1.98929	0.448206	81	178
REGULATION OF AUTOPHAGY%GOBP%GO:0010506	REGULATION OF AUTOPHAGY%GOBP%GO:0010506	0.000404694	0.00722012	1	TRIM5,DNM1L,DAPK3,MTMR8,LRSAM1,EEF1A2,VPS35,PIK3CA,RAB3GAP1,MTMR3,ATP13A2,TFEB,PARK7,CAPNS1,RAB3GAP2,VPS26B,RRAGC,WDR6,TSC2,SIRT2,EIF4G1,DAPK1,KLHL22,PAFAH1B2,EIF4G2,HSPB1,EIF4G3,VDAC1,GBA,SNX5,LARP1,CASP3,USP33,FOXO1,FEZ2,EIF4E,RPTOR,SNCA,CLEC16A,ATG7,MTMR9,BAD,TAB2,GSK3B,GOLGA2,CAPN1,MTOR,CTSA,VPS13D,FYCO1,KEAP1,DAP,KDM4A,UCHL1,SLC25A5,PRKD1,SNX6,PSAP,GAPDH,USP13,USP10,ZC3H12A,GPSM1,SEC22B,TRIM…	1.61716	0.364238	70	179
RRNA PROCESSING%REACTOME%R-HSA-72312.3	RRNA PROCESSING%REACTOME%R-HSA-72312.3	0.000410172	0.00728473	1	RPS4Y1,RPL37,RPS29,RPS10,RPS14,RPL36AL,RPS18,RPS16,RPLP1,RPS28,RPL36,RPL27,RPL36A,RPS19,RPS2,RPL23,RPS20,RPL19,RPS5,RPL17,RPL10A,RPL11,RPS11,RPL4,FAU,TRMT112,RPL38,RPS17,RPL3,RPS8,RIOK3,RPP38,RPL12,RPL26,RPS21,LTV1,RPP21,RPL13,RPL15,RPL7,HSD17B10,RPS15A,RPSA,RPL8,RPS7,EXOSC8,NOB1,RPL18,RPL27A,RPL32,MTERF4,RPS6,UBA52,RPL30,RPL37A,RPS3,PNO1,RPL21,BOP1,CSNK1E,RPL31,RPL10,RRP36,RPL7A,RPP40,RPL22L1,TR…	1.56237	0.351582	68	183
ANTIGEN PROCESSING: UBIQUITINATION & PROTEASOME DEGRADATION%REACTOME DATABASE ID RELEASE 77%983168	ANTIGEN PROCESSING: UBIQUITINATION & PROTEASOME DEGRADATION%REACTOME DATABASE ID RELEASE 77%983168	0.00041511	0.00733922	1	ASB2,KLHL21,FBXL22,UBE2H,CDC34,HECW2,GLMN,RNF41,RNF115,LRSAM1,RLIM,SIAH1,RNF14,PSME4,UBE2N,RCHY1,HERC2,UBE2S,SIAH2,UBE2D3,HERC1,RNF123,SMURF2,PSMF1,KLHL22,KLHL13,UBE2G1,UBE2D1,THOP1,HECTD1,ITCH,BTBD1,FBXL7,ZNRF2,PSMD9,PSME3,ARIH2,UNKL,UBE2E1,MKRN1,PSMD5,FBXO30,PSMA5,FBXL4,ATG7,ANAPC5,UBE3C,PSMB6,UBR4,RNF7,UBE2Q1,UBA3,HERC4,KEAP1,PSMD4,CUL2,PSMA1,ANAPC7,CUL3,UBE2K,UBE2O,PSMA7,UBE2V1,PSMB3,PSMB4,UB…	2.15218	0.482059	89	189
REGULATION OF PROTEIN CATABOLIC PROCESS%GOBP%GO:0042176	REGULATION OF PROTEIN CATABOLIC PROCESS%GOBP%GO:0042176	0.000420698	0.0074038	1	OPHN1,RILP,PTTG1IP,PIN1,HECW2,GLMN,RNF41,EEF1A2,VPS35,RNF14,ATP13A2,COMMD1,PARK7,RCHY1,PTEN,NUB1,SIRT2,SNX3,PRICKLE1,SMURF2,PSMF1,GIPC1,SNX12,HSP90AA1,AMER1,HECTD1,ARAF,GBA,APC,WWP2,SH3D19,RPL23,ARIH1,ITCH,BAG6,USP5,PSME3,ARIH2,RPL11,FOXO1,SNCA,NUDT15,VCP,OGT,USP25,ATG7,UBXN1,DDB1,ZYG11B,CCDC22,GSK3B,HSPBP1,CST3,CTSA,HGS,KEAP1,VPS28,HSP90AB1,RPS7,GABARAPL2,EIF3H,ATXN3,FAM83D,USP19,IDE,USP13,GPX1,…	1.45919	0.323945	70	201
SECRETION%GOBP%GO:0046903	SECRETION%GOBP%GO:0046903	0.000422535	0.0074038	-1	VAMP8,RAB27A,STXBP2,STXBP1,TANGO2,LIN7C,EXOC3L2,RAB11FIP1,STXBP3,RCN3,STX1B,STX3,RAB13,SLC9A3R1,SDF4,STX17,LYN,SLC32A1,PIK3C2A,PIP5K1C,PDZD11,LTBP2,STX2,PREB,SNAP25,LTBP4,FURIN,RAB8B,FGG,TMED10,RAB10,PCSK6,PCSK5,VAMP7,TPD52,MIA2,SNAP23,STX4,LIN7A,RAB8A,PDIA4,PCLO,SYT7,PNPLA8,GOLPH3,CANX,AQP1	-1.68156	-0.442077	47	121
TRANSLATION%GOBP%GO:0006412	TRANSLATION%GOBP%GO:0006412	0.000454133	0.00791701	1	RPS4Y1,PABPC4,EIF3K,PAIP1,EEF2,EEF1A2,MRPS2,MRPL41,MRPS11,RPL37,MTRF1L,EIF3C,EIF5,MRPS18B,MRPS14,RPS29,ASCC2,TRIP4,RPS10,EIF3E,MRPL51,EIF4G1,ZNF598,GTPBP1,EIF2B3,MRPS18A,RPS14,EEF1D,DRG1,MRPL23,PTCD3,EIF3B,RPS18,GATB,RPS16,DRG2,RPLP1,APEH,MRPS16,ASCC3,RPS28,RPL36,RPL27,EIF2S2,RPL36A,EIF3I,RPS19,RPS2,RPL23,EIF2B4,GSPT1,RPS20,RPL19,MRPS21,MRPS7,MRPS5,LARP1,RPS5,RPL17,RPL10A,RPL11,RPS11,RPL4,MRPS28,…	2.7674	0.606357	134	227
CLASS I MHC MEDIATED ANTIGEN PROCESSING & PRESENTATION%REACTOME DATABASE ID RELEASE 77%983169	CLASS I MHC MEDIATED ANTIGEN PROCESSING & PRESENTATION%REACTOME DATABASE ID RELEASE 77%983169	0.000457875	0.00791701	1	ASB2,KLHL21,FBXL22,UBE2H,CDC34,HECW2,GLMN,RNF41,RNF115,LRSAM1,RLIM,SIAH1,CTSL,RNF14,PSME4,UBE2N,RCHY1,SEC31A,HERC2,UBE2S,SIAH2,UBE2D3,HERC1,RNF123,SMURF2,PSMF1,KLHL22,KLHL13,UBE2G1,UBE2D1,THOP1,HECTD1,ITCH,BTBD1,FBXL7,ZNRF2,PSMD9,PSME3,ARIH2,UNKL,UBE2E1,MKRN1,PSMD5,FBXO30,ITGB5,PSMA5,FBXL4,ATG7,ANAPC5,UBE3C,PSMB6,IKBKB,UBR4,RNF7,UBE2Q1,UBA3,SEC24A,SAR1B,HERC4,KEAP1,PSMD4,CUL2,PSMA1,ANAPC7,CUL3,UB…	1.7469	0.382104	98	230
REGULATION OF TRANSLATION%GOBP%GO:0006417	REGULATION OF TRANSLATION%GOBP%GO:0006417	0.000457875	0.00791701	1	EIF1,CSDE1,PAIP1,HABP4,EEF2,SAMD4A,LARP4B,TRUB2,DAPK3,CTIF,METAP1,YTHDF3,EIF5A,EIF3C,EIF5,DHFR,MTG2,ASCC2,EIF5B,TRIP4,EIF3E,AGO4,YTHDF2,EIF4G1,ZNF598,DPH5,RPUSD4,DAPK1,FXR2,CPEB2,EIF3B,LARP4,EIF4G2,HSPB1,ATXN2,EIF4G3,ASCC3,LSM1,METTL5,EIF2S1,MALSU1,NCK2,EIF2B4,GSPT1,PABPC1,LARP1,NGRN,YBX1,RBM3,DPH2,MTG1,EIF4E,AGO2,RC3H1,CAPRIN1,EIF2B5,COA3,NANOS1,EIF2AK3,UPF1,CNBP,ETF1,RPS6KA3,CNOT10,DIS3L2,CNOT7…	1.86681	0.408333	94	230
PEPTIDE BIOSYNTHETIC PROCESS%GOBP%GO:0043043	PEPTIDE BIOSYNTHETIC PROCESS%GOBP%GO:0043043	0.000469484	0.00808212	1	RPS4Y1,PABPC4,EIF3K,PAIP1,EEF2,EEF1A2,MRPS2,MRPL41,MRPS11,RPL37,MTRF1L,EIF3C,EIF5,MRPS18B,MRPS14,RPS29,ASCC2,TRIP4,RPS10,EIF3E,MRPL51,EIF4G1,ZNF598,GTPBP1,EIF2B3,MRPS18A,RPS14,EEF1D,DRG1,MRPL23,PTCD3,EIF3B,RPS18,GATB,RPS16,DRG2,RPLP1,APEH,MRPS16,ASCC3,DMD,RPS28,RPL36,RPL27,EIF2S2,RPL36A,EIF3I,RPS19,RPS2,RPL23,EIF2B4,GSPT1,RPS20,RPL19,MRPS21,MRPS7,MRPS5,LARP1,RPS5,RPL17,RPL10A,RPL11,RPS11,RPL4,MRP…	2.62388	0.57159	146	237
G ALPHA (Q) SIGNALLING EVENTS%REACTOME%R-HSA-416476.6	G ALPHA (Q) SIGNALLING EVENTS%REACTOME%R-HSA-416476.6	0.000475737	0.00815401	-1	GNG5,TRH,NRAS,GRK5,GNB4,ITPR1,GNAQ,LPAR2,ITPR3,GNB1,NMB,HRAS,GNB2,RGS19,PRKCD,GNA14	-1.86092	-0.574228	16	45
REGULATION OF CELL MOTILITY%GOBP%GO:2000145	REGULATION OF CELL MOTILITY%GOBP%GO:2000145	0.000480827	0.0082022	-1	MOSPD2,STC1,MTUS1,LAMB1,THY1,BMP10,RECK,CD99,PODN,ICAM1,LAMC2,SH3RF2,ENG,ATP1B2,ANO6,ITGA6,JUP,CDH1,GNA12,ADAM17,SP100,EPHB2,LRP1,ADAM10,MYO1C,NRP2,MPP1,SRPX2,PODXL,TJP1,RAP2C,DCN,ROR2,FN1,COL1A1,ZNF609,SEMA4B,BMPER,ST3GAL4,LYN,P2RX4,ZMYND8,SFRP1,SP1,BST2,PIK3C2A,NRP1,WNT11,PAK1,MMP14,EMILIN1,HRAS,SEMA4D,VTN,PLXND1,PDGFB,ADAMTS9,DDX58,SEMA3C,SERPINE2,MECP2,ADAMTS1,CAMK2B,STK10,SEMA4C,MAGI2,MAZ,IG…	-1.4817	-0.348516	98	363
UBIQUITIN-DEPENDENT PROTEIN CATABOLIC PROCESS%GOBP%GO:0006511	UBIQUITIN-DEPENDENT PROTEIN CATABOLIC PROCESS%GOBP%GO:0006511	0.000486145	0.0082022	1	ASB2,TGFB1I1,FBXL22,KCTD5,UBE2H,CDC34,HECW2,RNF115,RLIM,SIAH1,RNF14,KCTD21,RCHY1,MIB1,ASCC2,PPP1R11,TRIP4,NUB1,SIRT2,UBE2S,SIAH2,UBE2D3,ZNF598,FEM1B,ZSWIM8,SMURF2,ARRB1,SQSTM1,PSMF1,KLHL22,PTPN23,DNAJB12,UBE2G1,ASCC3,UBE2D1,WWP2,ARIH1,VPS37C,ITCH,FBXL7,ZFAND2B,BAG6,PSMD9,AGAP3,ARIH2,USP33,UBE2E1,C18ORF25,RC3H1,UBAP1,VPS4A,VPS36,KIF14,VCP,TOLLIP,FBXL4,ANAPC5,UBE3C,UBXN1,DDB1,UBR4,RNF7,NPLOC4,OTUD7…	1.78624	0.385759	88	257
REGULATION OF CELLULAR AMIDE METABOLIC PROCESS%GOBP%GO:0034248	REGULATION OF CELLULAR AMIDE METABOLIC PROCESS%GOBP%GO:0034248	0.000486145	0.0082022	1	PIN1,EIF1,CSDE1,PAIP1,HABP4,EEF2,SAMD4A,LARP4B,TRUB2,DAPK3,CTIF,METAP1,YTHDF3,EIF5A,EIF3C,EIF5,DHFR,MTG2,ASCC2,EIF5B,TRIP4,TIGAR,EIF3E,AGO4,YTHDF2,EIF4G1,ZNF598,DPH5,PDK2,RPUSD4,DAPK1,FXR2,CPEB2,EIF3B,LARP4,EIF4G2,HSPB1,ATXN2,EIF4G3,ASCC3,LSM1,METTL5,EIF2S1,MALSU1,NCK2,EIF2B4,GSPT1,PABPC1,LARP1,CASP3,NGRN,YBX1,RBM3,DPH2,MTG1,EIF4E,AGO2,RC3H1,CAPRIN1,EIF2B5,COA3,NANOS1,EIF2AK3,UPF1,CNBP,ETF1,RPS6K…	1.72179	0.371842	100	257
PROTEIN UBIQUITINATION%GOBP%GO:0016567	PROTEIN UBIQUITINATION%GOBP%GO:0016567	0.000488043	0.0082022	1	ASB2,KLHL21,UBE2H,CDC34,TRIM5,HECW2,RNF41,RNF115,LRSAM1,RLIM,RNF14,UBE2N,RCHY1,MIB1,NUB1,HERC2,TRIM26,UBE2S,CBFB,ANKRD39,UBE2D3,ZNF598,ZSWIM8,TRAF6,SMURF2,ARRB1,KLHL22,KLHL13,UBE2G1,UBE2D1,THOP1,HECTD1,PEX12,WWP2,ARIH1,ITCH,FBXL7,NFX1,USP5,PDZRN3,ARIH2,UBE2E1,MKRN1,RC3H1,VCP,TRAF3,ANAPC5,UBE3C,DDB1,ISG15,AKTIP,RNF7,DTX2,MKRN2,RNF10,UBE2Q1,TRIM54,VCPIP1,UBR3,KEAP1,RNF181,TRIM55,RNF31,CUL2,ANAPC7,C…	1.70022	0.369511	109	249
TRANSLATION%REACTOME%R-HSA-72766.4	TRANSLATION%REACTOME%R-HSA-72766.4	0.000488998	0.0082022	1	RPS4Y1,EIF3K,EEF2,EEF1A2,MRPS2,MRPS23,MRPL41,MRPS11,RPL37,MTRF1L,CHCHD1,EIF3C,EIF5,MRPS18B,MRPS14,RPS29,EIF5B,RPS10,EIF3E,MRPL51,EIF4G1,EIF2B3,MRPS18A,RPS14,EEF1D,RPL36AL,MRPL23,PTCD3,EIF3B,RPS18,MRPL50,RPS16,MRPS26,RPLP1,APEH,DAP3,MRPS16,MRPS9,RPS28,RPL36,RPL27,EIF2S2,MRPS22,RPL36A,MRPL54,EIF3I,RPS19,RPS2,EIF2S1,RPL23,EIF2B4,GSPT1,RPS20,RPL19,MRPS21,MRPS7,N6AMT1,MRPS5,PABPC1,MRPL14,RPS5,RPL17,RP…	2.68547	0.578816	161	261
MODIFICATION-DEPENDENT PROTEIN CATABOLIC PROCESS%GOBP%GO:0019941	MODIFICATION-DEPENDENT PROTEIN CATABOLIC PROCESS%GOBP%GO:0019941	0.00049334	0.00823983	1	ASB2,TGFB1I1,FBXL22,KCTD5,UBE2H,CDC34,HECW2,RNF115,RLIM,SIAH1,RNF14,KCTD21,RCHY1,MIB1,ASCC2,PPP1R11,TRIP4,NUB1,SIRT2,UBE2S,SIAH2,UBE2D3,ZNF598,FEM1B,ZSWIM8,SMURF2,ARRB1,SQSTM1,PSMF1,KLHL22,PTPN23,DNAJB12,UBE2G1,ASCC3,UBE2D1,WWP2,ARIH1,VPS37C,ITCH,FBXL7,ZFAND2B,BAG6,PSMD9,AGAP3,ARIH2,USP33,UBE2E1,C18ORF25,RC3H1,UBAP1,VPS4A,VPS36,KIF14,VCP,TOLLIP,FBXL4,ANAPC5,UBE3C,UBXN1,DDB1,ISG15,UBR4,RNF7,NPLOC4…	1.75683	0.378735	90	263
MODIFICATION-DEPENDENT MACROMOLECULE CATABOLIC PROCESS%GOBP%GO:0043632	MODIFICATION-DEPENDENT MACROMOLECULE CATABOLIC PROCESS%GOBP%GO:0043632	0.000501002	0.00827221	1	ASB2,TGFB1I1,FBXL22,KCTD5,UBE2H,CDC34,HECW2,RNF115,RLIM,SIAH1,RNF14,KCTD21,RCHY1,MIB1,ASCC2,PPP1R11,TRIP4,NUB1,SIRT2,UBE2S,SIAH2,UBE2D3,ZNF598,FEM1B,ZSWIM8,SMURF2,ARRB1,SQSTM1,PSMF1,KLHL22,PTPN23,DNAJB12,UBE2G1,ASCC3,UBE2D1,WWP2,ARIH1,VPS37C,ITCH,FBXL7,ZFAND2B,BAG6,PSMD9,AGAP3,ARIH2,USP33,UBE2E1,C18ORF25,RC3H1,UBAP1,VPS4A,VPS36,KIF14,VCP,DIS3L2,TOLLIP,FBXL4,ANAPC5,UBE3C,UBXN1,DDB1,ISG15,UBR4,RNF7…	1.73662	0.373437	92	271
PROTEIN MODIFICATION BY SMALL PROTEIN CONJUGATION%GOBP%GO:0032446	PROTEIN MODIFICATION BY SMALL PROTEIN CONJUGATION%GOBP%GO:0032446	0.000502765	0.00827221	1	ASB2,KLHL21,UBE2H,CDC34,TRIM5,HECW2,RNF41,RNF115,LRSAM1,RLIM,RNF14,UBE2N,RCHY1,DCUN1D2,MIB1,NUB1,HERC2,UFC1,TRIM26,UBE2S,CBFB,ANKRD39,UBE2D3,ZNF598,ZSWIM8,TRAF6,SMURF2,ARRB1,KLHL22,KLHL13,UBE2G1,UBE2D1,THOP1,HECTD1,PEX12,WWP2,ARIH1,ITCH,FBXL7,NFX1,USP5,PDZRN3,ARIH2,UBE2E1,MKRN1,RC3H1,VCP,TRAF3,ATG7,ANAPC5,UBE3C,BCL11A,DDB1,ISG15,AKTIP,RNF7,DTX2,MKRN2,RNF10,UBE2Q1,UBA3,TRIM54,VCPIP1,UBR3,KEAP1,RNF…	1.62288	0.346926	112	281
CIRCULATORY SYSTEM DEVELOPMENT%GOBP%GO:0072359	CIRCULATORY SYSTEM DEVELOPMENT%GOBP%GO:0072359	0.000503842	0.00827221	-1	MYH6,DSG2,COL4A1,LGALS8,THY1,BMP10,RECK,HSPG2,COL1A2,NEBL,DSP,FOLR1,ENG,EGFL7,FBN1,BMP7,LAMA1,EPHB2,LOXL2,LRP1,CRIP1,NRP2,TCAP,HEY2,FN1,COL1A1,NCOA6,BMPER,ATP7A,SPRY1,NCL,CXADR,STRA6,NRP1,TGFBI,EMILIN1,HAND2,NKX2-5,CFC1,PLXND1,PDGFB,ADAMTS9,CACNA1C,S1PR1,SEMA3C,RNF213,NDUFV2,ERBB3,STK11,MYBPC3,CTNNB1,THBS1,TTN,WDR11,FLRT3,PDLIM4,PDCD4,GPC3,CRELD1,PCSK5,TMEM65,ROBO2,NOG,FGF2,ANGPTL2,RBPJ,JAM3,MYL3…	-1.52848	-0.370493	79	247
ADORA2B MEDIATED ANTI-INFLAMMATORY CYTOKINES PRODUCTION%REACTOME DATABASE ID RELEASE 77%9660821	ADORA2B MEDIATED ANTI-INFLAMMATORY CYTOKINES PRODUCTION%REACTOME DATABASE ID RELEASE 77%9660821	0.000505221	0.00827221	-1	GNG5,GNAZ,GNB4,ADCY9,GNAI3,GNB1,GNAS,GNAI2,GNB2	-1.96356	-0.704527	9	22
AMIDE BIOSYNTHETIC PROCESS%GOBP%GO:0043604	AMIDE BIOSYNTHETIC PROCESS%GOBP%GO:0043604	0.000505817	0.00827221	1	RPS4Y1,ASAH1,PABPC4,EIF3K,PAIP1,EEF2,EEF1A2,MRPS2,MRPL41,MRPS11,RPL37,MTRF1L,EIF3C,EIF5,MRPS18B,MRPS14,RPS29,ASCC2,TRIP4,RPS10,EIF3E,MRPL51,EIF4G1,ZNF598,GTPBP1,EIF2B3,MRPS18A,RPS14,EEF1D,DRG1,MRPL23,PTCD3,EIF3B,RPS18,GATB,RPS16,DRG2,RPLP1,APEH,MRPS16,ASCC3,DMD,RPS28,RPL36,RPL27,EIF2S2,RPL36A,EIF3I,GBA,RPS19,RPS2,RPL23,EIF2B4,GSPT1,RPS20,RPL19,SMPD1,MRPS21,MRPS7,MRPS5,LARP1,RPS5,RPL17,RPL10A,RPL1…	2.29655	0.491105	156	280
GLUCAGON-LIKE PEPTIDE-1 (GLP1) REGULATES INSULIN SECRETION%REACTOME%R-HSA-381676.4	GLUCAGON-LIKE PEPTIDE-1 (GLP1) REGULATES INSULIN SECRETION%REACTOME%R-HSA-381676.4	0.000508302	0.00827837	-1	GNG5,AKAP5,GNB4,ITPR1,ITPR3,GNB1,GNAS,IQGAP1,GNB2	-1.95275	-0.718197	9	20
POSTTRANSCRIPTIONAL REGULATION OF GENE EXPRESSION%GOBP%GO:0010608	POSTTRANSCRIPTIONAL REGULATION OF GENE EXPRESSION%GOBP%GO:0010608	0.000515464	0.00830892	1	EIF1,CSDE1,PAIP1,HABP4,EEF2,SAMD4A,LARP4B,TRUB2,DAPK3,CTIF,METAP1,YTHDF3,EIF5A,EIF3C,EIF5,MAPKAPK2,DHFR,PHAX,MTG2,ASCC2,EIF5B,TRIP4,EIF3E,AGO4,YTHDF2,EIF4G1,ZNF598,DPH5,RPUSD4,DAPK1,FXR2,CPEB2,EIF3B,LARP4,EIF4G2,HSPB1,ATXN2,EIF4G3,ASCC3,LSM1,APEX1,METTL5,EIF2S1,MALSU1,NCK2,SMAD2,EIF2B4,GSPT1,PABPC1,LARP1,DXO,NGRN,YBX1,RBM3,DPH2,PRKCA,MTG1,EIF4E,AGO2,RC3H1,CAPRIN1,EIF2B5,COA3,NANOS1,EIF2AK3,UPF1,C…	1.64175	0.35029	105	289
HETEROTYPIC CELL-CELL ADHESION%GOBP%GO:0034113	HETEROTYPIC CELL-CELL ADHESION%GOBP%GO:0034113	0.00051573	0.00830892	-1	DSG2,DSC2,DSP,CTNNA3,JUP,CXADR	-1.96243	-0.748666	6	17
PEPTIDE METABOLIC PROCESS%GOBP%GO:0006518	PEPTIDE METABOLIC PROCESS%GOBP%GO:0006518	0.000516529	0.00830892	1	RPS4Y1,GLRX2,PABPC4,EIF3K,PAIP1,EEF2,EEF1A2,MRPS2,CTSL,GSTM3,MRPL41,MRPS11,RPL37,MTRF1L,PARK7,EIF3C,EIF5,MRPS18B,MRPS14,RPS29,ASCC2,TRIP4,RPS10,EIF3E,MRPL51,EIF4G1,ZNF598,GTPBP1,EIF2B3,MRPS18A,RPS14,EEF1D,DRG1,MRPL23,PTCD3,EIF3B,RPS18,GATB,RPS16,DRG2,RPLP1,APEH,MRPS16,ASCC3,DMD,RPS28,RPL36,THOP1,RPL27,EIF2S2,RPL36A,EIF3I,RPS19,RPS2,RPL23,EIF2B4,GSPT1,RPS20,RPL19,MRPS21,MRPS7,TPP1,MRPS5,CLN5,LARP1…	2.34976	0.500643	166	293
METABOLISM OF POLYAMINES%REACTOME DATABASE ID RELEASE 77%351202	METABOLISM OF POLYAMINES%REACTOME DATABASE ID RELEASE 77%351202	0.000536049	0.00855282	1	PSME4,PSMF1,PSMD9,PSME3,PSMD5,PSMA5,PSMB6,SMS,PSMD4,PSMA1,PSMA7,PSMB3,PSMB4,PSMA6,PSMD11	1.90263	0.553581	15	41
NEGATIVE REGULATION OF AUTOPHAGY%GOBP%GO:0010507	NEGATIVE REGULATION OF AUTOPHAGY%GOBP%GO:0010507	0.000536049	0.00855282	1	MTMR8,PIK3CA,WDR6,TSC2,SIRT2,EIF4G1,KLHL22,EIF4G2,EIF4G3,FEZ2,EIF4E,SNCA,CLEC16A,ATG7,MTMR9,TAB2,GOLGA2,MTOR,CTSA,DAP,KDM4A	1.86789	0.543474	21	41
DEGRADATION OF GLI2 BY THE PROTEASOME%REACTOME%R-HSA-5610783.1	DEGRADATION OF GLI2 BY THE PROTEASOME%REACTOME%R-HSA-5610783.1	0.000545554	0.0086184	1	PSME4,PSMF1,PSMD9,PSME3,PSMD5,PSMA5,PSMB6,GSK3B,PSMD4,PSMA1,PSMA7,PSMB3,PSMB4,UBA52,PRKACA,PSMA6,PSMD11	1.85499	0.5151	17	50
GLI3 IS PROCESSED TO GLI3R BY THE PROTEASOME%REACTOME%R-HSA-5610785.1	GLI3 IS PROCESSED TO GLI3R BY THE PROTEASOME%REACTOME%R-HSA-5610785.1	0.000545554	0.0086184	1	PSME4,PSMF1,PSMD9,PSME3,PSMD5,PSMA5,PSMB6,GSK3B,PSMD4,PSMA1,PSMA7,PSMB3,PSMB4,UBA52,PRKACA,PSMA6,PSMD11	1.85499	0.5151	17	50
PROTEOLYSIS INVOLVED IN CELLULAR PROTEIN CATABOLIC PROCESS%GOBP%GO:0051603	PROTEOLYSIS INVOLVED IN CELLULAR PROTEIN CATABOLIC PROCESS%GOBP%GO:0051603	0.000546747	0.0086184	1	ASB2,TGFB1I1,FBXL22,KCTD5,UBE2H,CDC34,HECW2,RNF41,RNF115,RLIM,SIAH1,CTSL,RNF14,KCTD21,PSME4,RCHY1,MIB1,ASCC2,PPP1R11,TRIP4,NUB1,SIRT2,UBE2S,SIAH2,UBE2D3,ZNF598,RNF123,FEM1B,ZSWIM8,SMURF2,ARRB1,SQSTM1,PSMF1,KLHL22,PTPN23,DNAJB12,LGMN,UBE2G1,ASCC3,UBE2D1,CAPN2,WWP2,NGLY1,ARIH1,VPS37C,ITCH,FBXL7,ZFAND2B,BAG6,PSMD9,CLPX,AGAP3,ARIH2,USP33,UBE2E1,C18ORF25,RC3H1,PSMA5,UBAP1,VPS4A,VPS36,KIF14,VCP,TOLLIP,…	1.71719	0.363408	108	315
CELLULAR PROTEIN CATABOLIC PROCESS%GOBP%GO:0044257	CELLULAR PROTEIN CATABOLIC PROCESS%GOBP%GO:0044257	0.000559284	0.00878076	1	ASB2,TGFB1I1,FBXL22,KCTD5,UBE2H,CDC34,HECW2,RNF41,RNF115,RLIM,SIAH1,CTSL,RNF14,KCTD21,PSME4,RCHY1,MIB1,ASCC2,PPP1R11,TRIP4,NUB1,SIRT2,UBE2S,SIAH2,UBE2D3,ZNF598,RNF123,FEM1B,ZSWIM8,SMURF2,ARRB1,SQSTM1,PSMF1,KLHL22,PTPN23,DNAJB12,LGMN,UBE2G1,ASCC3,UBE2D1,CAPN2,WWP2,NGLY1,ARIH1,VPS37C,ITCH,FBXL7,ZFAND2B,BAG6,PSMD9,CLPX,AGAP3,ARIH2,USP33,UBE2E1,C18ORF25,RC3H1,PSMA5,UBAP1,VPS4A,VPS36,KIF14,VCP,TOLLIP,…	1.61928	0.340836	108	330
SECRETION BY CELL%GOBP%GO:0032940	SECRETION BY CELL%GOBP%GO:0032940	0.000570288	0.00891785	-1	VAMP8,RAB27A,STXBP2,STXBP1,TANGO2,LIN7C,EXOC3L2,RAB11FIP1,STXBP3,RCN3,STX1B,STX3,RAB13,SDF4,STX17,LYN,SLC32A1,PIK3C2A,PIP5K1C,PDZD11,LTBP2,STX2,PREB,SNAP25,LTBP4,FURIN,RAB8B,FGG,TMED10,RAB10,PCSK6,PCSK5,VAMP7,MIA2,SNAP23,STX4,LIN7A,RAB8A,PDIA4,PCLO,SYT7,GOLPH3,CANX	-1.65495	-0.439716	43	112
PROTEIN MODIFICATION BY SMALL PROTEIN CONJUGATION OR REMOVAL%GOBP%GO:0070647	PROTEIN MODIFICATION BY SMALL PROTEIN CONJUGATION OR REMOVAL%GOBP%GO:0070647	0.000583431	0.00908716	1	ASB2,KLHL21,UBE2H,CDC34,TRIM5,HECW2,RNF41,RNF115,LRSAM1,RLIM,RNF14,UBE2N,RCHY1,DCUN1D2,MIB1,NUB1,HERC2,UFC1,TRIM26,UBE2S,CBFB,ANKRD39,UBE2D3,COPS4,ZNF598,ZSWIM8,TRAF6,SMURF2,ARRB1,KLHL22,KLHL13,UBE2G1,UBE2D1,THOP1,HECTD1,PEX12,WWP2,ARIH1,ITCH,FBXL7,COPS2,NFX1,OTUB1,USP5,PDZRN3,ARIH2,USP33,UBE2E1,MKRN1,RC3H1,USP15,VCP,USP25,TRAF3,ATG7,ANAPC5,UBE3C,BCL11A,DDB1,EIF3F,ISG15,AKTIP,RNF7,DTX2,MKRN2,RNF1…	1.66005	0.347723	149	347
PROTEIN CATABOLIC PROCESS%GOBP%GO:0030163	PROTEIN CATABOLIC PROCESS%GOBP%GO:0030163	0.000585823	0.00908836	1	ASB2,TGFB1I1,FBXL22,KCTD5,UBE2H,CDC34,HSPA8,HECW2,RNF41,RNF115,LRSAM1,RLIM,SIAH1,CTSL,RNF14,KCTD21,PSME4,RCHY1,MIB1,ASCC2,PPP1R11,TRIP4,NUB1,SIRT2,UBE2S,SIAH2,UBE2D3,ZNF598,RNF123,FEM1B,ZSWIM8,SMURF2,ARRB1,SQSTM1,PSMF1,KLHL22,PTPN23,DNAJB12,LGMN,UBE2G1,ASCC3,UBE2D1,HSP90AA1,CAPN2,WWP2,NGLY1,ARIH1,VPS37C,ITCH,TPP1,FBXL7,ZFAND2B,CLN5,BAG6,PSMD9,CLPX,AGAP3,ARIH2,USP33,UBE2E1,C18ORF25,SGSH,RC3H1,LYPL…	1.59944	0.334279	118	355
POSITIVE REGULATION OF ION TRANSPORT%GOBP%GO:0043270	POSITIVE REGULATION OF ION TRANSPORT%GOBP%GO:0043270	0.000597282	0.00920363	-1	TRH,STC1,AHCYL1,THY1,VAMP8,CACNB2,TESC,ATP2B1,ATP1B1,SLC9A1,ATP1B2,FXYD1,ANO6,EPHB2,WFS1,CACNB3,DLG1,ANK3,P2RX4,NKX2-5,PDGFB,WNK2,ATP1B3,NOS1AP	-1.80803	-0.506336	24	79
REGULATION OF MULTICELLULAR ORGANISMAL DEVELOPMENT%GOBP%GO:2000026	REGULATION OF MULTICELLULAR ORGANISMAL DEVELOPMENT%GOBP%GO:2000026	0.000597943	0.00920363	-1	THY1,BMP10,HTATIP2,METRN,HSPG2,TESC,ATP2B1,ATF2,FBN2,F11R,LOXL3,HK2,EFNB3,ANO6,LGALS1,ADD1,JUP,FGF13,ADAMTS7,FBN1,BMP7,SP100,EPHB2,LOXL2,AGRN,SRPX2,TJP1,HEY2,DCN,MYDGF,SEMA4B,BMPER,NUMA1,MBOAT2,SPRY1,LYN,SFRP1,SP1,GTF2I,BMP2K,NRP1,WNT11,ANGPTL4,MMP14,EMILIN1,SEMA4D,BMP1,PLXND1,ADAMTS9,S1PR1,ARNT,SEMA3C,EPN1,SERPINE2,MECP2,ADAMTS1,TAPT1,AXL,LRRC4B,CAMK2B,SEMA4C,CTNNB1,MTDH,PAK4,PML,THBS1,ECM1,NPTN…	-1.45146	-0.340906	91	368
MICROTUBULE-BASED TRANSPORT%GOBP%GO:0099111	MICROTUBULE-BASED TRANSPORT%GOBP%GO:0099111	0.000601142	0.00921673	1	BICD2,HSPA8,PCM1,TRAK1,RHOT2,OFD1,LRPPRC,HSPB1,DYNC1H1,ACTR10,TTC21B,AP3S2,AP3D1,DYNC1I1,CEP131,SPG11,IFT81,NDEL1,COPG1,FYCO1,AP3B1,NEFL,KIF13A,DCTN1,KIF1C,MAPK8IP3,IFT57,PAFAH1B1,KIF1B,BLOC1S4,AP3S1,IFT140,BICD1,DYNC1I2,NDE1,WDR19,PEX14	1.78769	0.457361	37	77
EMBRYONIC ORGAN DEVELOPMENT%GOBP%GO:0048568	EMBRYONIC ORGAN DEVELOPMENT%GOBP%GO:0048568	0.000604595	0.0092336	-1	COL2A1,FBN2,FOLR1,ENG,FBN1,BMP7,EPHB2,MFAP2,HEY2,KDM2B,STRA6,PBX3,NKX2-5,PDGFB,MYO6,CTNNB1,PBX2,IGF2,HOXB4,PCSK5,NOG,RBPJ	-1.78603	-0.509972	22	70
INTEGRINS IN ANGIOGENESIS%PATHWAY INTERACTION DATABASE NCI-NATURE CURATED DATA%INTEGRINS IN ANGIOGENESIS	INTEGRINS IN ANGIOGENESIS%PATHWAY INTERACTION DATABASE NCI-NATURE CURATED DATA%INTEGRINS IN ANGIOGENESIS	0.000633012	0.0096001	-1	COL2A1,COL4A1,COL11A2,COL6A2,COL1A2,COL4A6,COL4A5,F11R,COL6A1,COL6A3,COL5A1,FN1,COL1A1,PIK3C2A,PI4KA,VTN,RHOA,FGF2,RAC1,MFGE8,SRC,CDKN1B,COL3A1	-1.85967	-0.570867	23	46
HALLMARK_COAGULATION%MSIGDB_C2%HALLMARK_COAGULATION	HALLMARK_COAGULATION%MSIGDB_C2%HALLMARK_COAGULATION	0.000634317	0.0096001	-1	CLU,HTRA1,FBN1,APOA1,CAPN5,MMP2,MMP14,BMP1,GNB2,PRSS23,FURIN,SERPINA1,THBS1,A2M,TFPI2,TIMP3,ADAM9,ISCU,RAC1,SERPINE1,PLAT,LEFTY2	-1.83354	-0.56578	22	45
EMBRYONIC ORGAN MORPHOGENESIS%GOBP%GO:0048562	EMBRYONIC ORGAN MORPHOGENESIS%GOBP%GO:0048562	0.00063593	0.0096001	-1	COL2A1,FBN2,FOLR1,ENG,FBN1,EPHB2,MFAP2,KDM2B,STRA6,NKX2-5,MYO6,CTNNB1,HOXB4,NOG,TGFBR1	-1.84019	-0.57031	15	44
EPITHELIUM DEVELOPMENT%GOBP%GO:0060429	EPITHELIUM DEVELOPMENT%GOBP%GO:0060429	0.000641026	0.00962165	-1	PCK2,MARVELD2,COL4A1,STC1,POF1B,F11R,LOXL3,ICAM1,DSP,FOLR1,ENG,LAMA3,LIN7C,LAMA5,SLC4A7,BMP7,ADAM17,RCN3,COL5A1,RAB13,SLC9A3R1,ERCC2,PODXL,TJP1,HEY2,RAP2C,CD44,NPNT,ATP7A,IQGAP1,JAG2,PIP5K1A,KDM2B,STRA6,NRP1,WNT11,PAK1,HDAC1,NKX2-5,PDGFB,TRAF3IP1,TST,MYO6,RAP1B,SEMA4C,MAGI2,CTNNB1,CHRD,TAGLN2,FLRT3,GPC3,IRF6,RHOA,RAB10,ADAM9,RDX,ROBO2,CDK6,RAP1A,FGF2,RBPJ,RAPGEF6	-1.54295	-0.377459	62	227
CELLULAR AMIDE METABOLIC PROCESS%GOBP%GO:0043603	CELLULAR AMIDE METABOLIC PROCESS%GOBP%GO:0043603	0.000642261	0.00962165	1	RPS4Y1,GLRX2,ASAH1,PABPC4,NEU1,EIF3K,PAIP1,EEF2,EEF1A2,MRPS2,CTSL,GSTM3,MRPL41,MRPS11,RPL37,MTRF1L,PARK7,EIF3C,EIF5,MRPS18B,MRPS14,RPS29,DHFR,ASCC2,TRIP4,NAGK,RPS10,EIF3E,MRPL51,MVD,NT5C2,EIF4G1,ZNF598,GTPBP1,EIF2B3,MRPS18A,ACOT8,RPS14,EEF1D,DRG1,MRPL23,PTCD3,EIF3B,RPS18,GATB,RPS16,DRG2,RPLP1,APEH,MRPS16,ASCC3,DMD,PPP2R1A,RPS28,RPL36,THOP1,RPL27,EIF2S2,MVK,RPL36A,EIF3I,GBA,RPS19,RPS2,RPL23,EIF2B4…	2.02183	0.418495	205	393
GASTRULATION%GOBP%GO:0007369	GASTRULATION%GOBP%GO:0007369	0.000645161	0.00962836	-1	LAMB1,COL6A1,LAMB3,LAMA3,FN1,MMP2,MMP14,VTN,UGDH,SETD2,GPC3,COL4A2,CTR9,RTF1,CER1,CDC73,ITGA5,TBX20,MIXL1,ITGA2	-1.84226	-0.587759	20	38
MICROTUBULE-BASED MOVEMENT%GOBP%GO:0007018	MICROTUBULE-BASED MOVEMENT%GOBP%GO:0007018	0.000649351	0.00965225	1	BICD2,HSPA8,PCM1,TRAK1,RHOT2,KIF21A,OFD1,DNAH10,LRPPRC,HSPB1,DYNC1H1,ACTR10,TTC21B,AP3S2,SORD,AP3D1,DNAAF5,DYNC1I1,DYNLT1,CEP131,SPG11,IFT81,KIF14,NDEL1,COPG1,FYCO1,DLGAP5,AP3B1,NEFL,KIF13A,DCTN1,KIF1C,MAPK8IP3,IFT57,PAFAH1B1,KIF1B,BLOC1S4,AP3S1,IFT140,MAP4,BICD1,DYNC1I2,DYNC1LI1,NDE1,WDR19,PEX14,YIF1B	1.73057	0.420982	47	103
PID_AVB3_INTEGRIN_PATHWAY%MSIGDB_C2%PID_AVB3_INTEGRIN_PATHWAY	PID_AVB3_INTEGRIN_PATHWAY%MSIGDB_C2%PID_AVB3_INTEGRIN_PATHWAY	0.000656599	0.00965225	-1	COL2A1,COL4A1,COL11A2,COL14A1,COL1A2,COL4A6,COL4A5,F11R,COL6A1,COL1A1,PIK3C2A,VTN,FGF2,RAC1,SRC,CDKN1B,COL3A1	-1.84822	-0.597267	17	36
ENDOTHELINS%PATHWAY INTERACTION DATABASE NCI-NATURE CURATED DATA%ENDOTHELINS	ENDOTHELINS%PATHWAY INTERACTION DATABASE NCI-NATURE CURATED DATA%ENDOTHELINS	0.000656599	0.00965225	-1	COL1A2,GNAZ,SLC9A1,GNAQ,GNA12,ADCY9,GNAI3,GNAI2,HRAS,JUN,PRKCD,GNA14,RHOA,RAC1,GNA11,SRC,COL3A1,GNAI1	-1.82679	-0.59034	18	36
POSITIVE REGULATION OF PROTEIN LOCALIZATION TO CELL PERIPHERY%GOBP%GO:1904377	POSITIVE REGULATION OF PROTEIN LOCALIZATION TO CELL PERIPHERY%GOBP%GO:1904377	0.000656599	0.00965225	-1	AKAP5,EPB41L2,EPB41,EPHB2,STX3,ARHGEF16,LRP1,DLG1,CNST,NUMA1,ACSL3,ATP2B4,RHOG,CIB1,ARF6,ZDHHC5,STX4,GNAI1,ATP2C1	-1.8223	-0.58889	19	36
PID_A6B1_A6B4_INTEGRIN_PATHWAY%MSIGDB_C2%PID_A6B1_A6B4_INTEGRIN_PATHWAY	PID_A6B1_A6B4_INTEGRIN_PATHWAY%MSIGDB_C2%PID_A6B1_A6B4_INTEGRIN_PATHWAY	0.00066291	0.00969185	-1	LAMB1,LAMA4,LAMC1,LAMC2,LAMB3,LAMA3,ITGA6,LAMA5,LAMA1,LAMB2,HRAS,ERBB3	-1.91574	-0.656997	12	27
ENDODERM DEVELOPMENT%GOBP%GO:0007492	ENDODERM DEVELOPMENT%GOBP%GO:0007492	0.000664231	0.00969185	-1	LAMB1,LAMC1,COL6A1,LAMB3,LAMA3,FN1,MMP2,MMP14,VTN,SETD2,COL4A2,CTR9,RTF1,CDC73,ITGA5,TBX20,MIXL1	-1.8878	-0.643025	17	28
ENDODERM FORMATION%GOBP%GO:0001706	ENDODERM FORMATION%GOBP%GO:0001706	0.000673627	0.00979255	-1	LAMB1,COL6A1,LAMB3,LAMA3,FN1,MMP2,MMP14,VTN,SETD2,COL4A2,CTR9,RTF1,CDC73,ITGA5,TBX20,MIXL1	-1.8635	-0.65732	16	24
REGULATION OF CARDIAC MUSCLE CELL ACTION POTENTIAL%GOBP%GO:0098901	REGULATION OF CARDIAC MUSCLE CELL ACTION POTENTIAL%GOBP%GO:0098901	0.000676247	0.00979435	-1	DSG2,DSC2,DSP,CTNNA3,JUP,FGF13,DLG1,CXADR,CACNA1C,NOS1AP	-1.95081	-0.708351	10	21
S1P2 PATHWAY%PATHWAY INTERACTION DATABASE NCI-NATURE CURATED DATA%S1P2 PATHWAY	S1P2 PATHWAY%PATHWAY INTERACTION DATABASE NCI-NATURE CURATED DATA%S1P2 PATHWAY	0.00068271	0.00981552	-1	GNAZ,GNAQ,GNA12,GNAI3,PAK1,GNAI2,JUN,GNA14,RHOA,RAC1,GNA11,GNA13,GNAI1	-1.91683	-0.722133	13	18
EXPORT ACROSS PLASMA MEMBRANE%GOBP%GO:0140115	EXPORT ACROSS PLASMA MEMBRANE%GOBP%GO:0140115	0.00068271	0.00981552	-1	ATP1A2,ATP2B1,ATP1B1,ATP1A1,SLC9A1,ATP1B2,ATP1B3,KCNQ1,RALBP1	-1.92965	-0.726963	9	18
INFLUENZA VIRAL RNA TRANSCRIPTION AND REPLICATION%REACTOME%R-HSA-168273.3	INFLUENZA VIRAL RNA TRANSCRIPTION AND REPLICATION%REACTOME%R-HSA-168273.3	0.00068918	0.00987238	1	RPS4Y1,RPL37,RPS29,RPS10,RPS14,RPL36AL,RPS18,RPS16,RPLP1,RPS28,RPL36,RPL27,HSP90AA1,RPL36A,RPS19,RPS2,IPO5,RPL23,RPS20,RPL19,GRSF1,RPS5,RPL17,RPL10A,RPL11,RPS11,RPL4,FAU,RPL38,RPS17,RPL3,RPS8,RPL12,RPL26,RPS21,RPL13,RPL15,RPL7,RPS15A,RPSA,RPL8,RPS7,RPL18,RPL27A,RPL32,RPS6,UBA52,RPL30,POLR2L,RPL37A,RPS3	1.65644	0.392606	51	121
PROTEIN POLYUBIQUITINATION%GOBP%GO:0000209	PROTEIN POLYUBIQUITINATION%GOBP%GO:0000209	0.000693722	0.0099013	1	UBE2H,CDC34,TRIM5,HECW2,RNF41,RNF115,LRSAM1,RNF14,UBE2N,UBE2S,CBFB,ANKRD39,UBE2D3,TRAF6,SMURF2,UBE2G1,UBE2D1,THOP1,HECTD1,WWP2,ARIH1,ITCH,FBXL7,ARIH2,UBE2E1,MKRN1,RC3H1,TRAF3,ANAPC5,UBE3C,AKTIP,UBE2Q1,RNF31,ANAPC7,CUL3,UBE2K,UBE2O,CHFR,UBE2V1,RMND5A	1.84363	0.435871	40	124
G2 M TRANSITION%REACTOME%R-HSA-69275.5	G2 M TRANSITION%REACTOME%R-HSA-69275.5	0.000705467	0.0100022	1	LCMT1,PCM1,PSME4,TUBA1A,PPP2R3B,SSNA1,OFD1,PSMF1,CEP135,TUBB,PPP2R1A,DYNC1H1,TUBB4B,HSP90AA1,FBXL7,PSMD9,PSME3,PSMD5,CEP131,PSMA5,ACTR1A,PSMB6,WEE1,PSMD4,HSP90AB1,PSMA1,LIN37,PSMA7,TUBGCP5,PAFAH1B1,PSMB3,FKBPL,PSMB4,TUBGCP3,UBA52,CDK5RAP2,AJUBA,YWHAE,PRKACA,CSNK1E,FBXL18,CDK1,DYNC1I2,PSMA6,NDE1,CDK2,PPP2CA,PSMD11,CLASP1,PCNT,CCNB1,NME7,DCTN3,MAPRE1,CEP290,PSMD1,PRKAR2B	1.66455	0.388072	57	137
POSITIVE REGULATION OF MULTICELLULAR ORGANISMAL PROCESS%GOBP%GO:0051240	POSITIVE REGULATION OF MULTICELLULAR ORGANISMAL PROCESS%GOBP%GO:0051240	0.00070855	0.0100022	-1	CADM1,BMP10,VAMP8,ATP1A2,METRN,TESC,ATP2B1,CLU,FBN2,HK2,GATM,SLC9A1,ENG,PRDM16,ANO6,LGALS1,JUP,IFI16,BMP7,ADAM17,EPHB2,LOXL2,AGRN,MFAP2,LRP1,ZNF516,SRPX2,CD55,TJP1,PHB,PARP1,COL1A1,MYDGF,GNAS,BMPER,NUMA1,ST3GAL4,SP1,LIPG,NRP1,ANGPTL4,MMP14,NOD1,SEMA4D,HAND2,NKX2-5,ENO1,BMP1,PLXND1,PDGFB,ARNT,DDX58,STOML2,FLOT1,TP53BP1,MAD2L2,SERPINE2,TAPT1,FURIN,THRA,AXL,LRRC4B,AGPAT2,SETD2,CAMK2B,HLA-A,CTNNB1,MT…	-1.43888	-0.336165	108	400
MITOTIC G2-G2 M PHASES%REACTOME%R-HSA-453274.2	MITOTIC G2-G2 M PHASES%REACTOME%R-HSA-453274.2	0.000710985	0.0100022	1	LCMT1,PCM1,PSME4,TUBA1A,PPP2R3B,SSNA1,OFD1,PSMF1,CEP135,TUBB,PPP2R1A,DYNC1H1,TUBB4B,HSP90AA1,FBXL7,PSMD9,PSME3,PSMD5,CEP131,PSMA5,ACTR1A,PSMB6,WEE1,PSMD4,HSP90AB1,PSMA1,LIN37,PSMA7,TUBGCP5,PAFAH1B1,PSMB3,FKBPL,PSMB4,TUBGCP3,UBA52,CDK5RAP2,AJUBA,YWHAE,PRKACA,CSNK1E,FBXL18,CDK1,DYNC1I2,PSMA6,NDE1,CDK2,PPP2CA,PSMD11,CLASP1,PCNT,CCNB1,NME7,DCTN3,MAPRE1,CEP290,PSMD1,PRKAR2B	1.65442	0.385616	57	138
INFLUENZA INFECTION%REACTOME%R-HSA-168255.4	INFLUENZA INFECTION%REACTOME%R-HSA-168255.4	0.000710985	0.0100022	1	RPS4Y1,KPNA2,RPL37,RPS29,RPS10,RPS14,RPL36AL,RPS18,KPNA1,RPS16,RPLP1,RPS28,RPL36,RPL27,HSP90AA1,RPL36A,RPS19,RPS2,IPO5,RPL23,RPS20,RPL19,GRSF1,RPS5,RPL17,RPL10A,RPL11,RPS11,RPL4,FAU,RPL38,RPS17,RPL3,RPS8,RPL12,RPL26,RPS21,SLC25A6,ISG15,RPL13,RPL15,RPL7,KPNA4,RPS15A,RPSA,RPL8,RPS7,RPL18,RPL27A,RPL32,RPS6,UBA52,RPL30,POLR2L,RPL37A,RPS3	1.63253	0.380513	56	138
BIOCARTA_MTOR_PATHWAY%MSIGDB_C2%BIOCARTA_MTOR_PATHWAY	BIOCARTA_MTOR_PATHWAY%MSIGDB_C2%BIOCARTA_MTOR_PATHWAY	0.000716846	0.0100486	1	PIK3R1,PIK3CA,PTEN,TSC2,EIF4G1,PDK2,EIF4E,EIF3A,MTOR,EIF4A2,EIF4A1	1.88009	0.676325	11	17
CELLULAR MACROMOLECULE CATABOLIC PROCESS%GOBP%GO:0044265	CELLULAR MACROMOLECULE CATABOLIC PROCESS%GOBP%GO:0044265	0.000722543	0.0100721	1	ASB2,TGFB1I1,FBXL22,KCTD5,PABPC4,UBE2H,CDC34,CSDE1,HECW2,SAMD4A,RNF41,RNF115,RLIM,SIAH1,CTSL,CTIF,RNF14,KCTD21,PSME4,RCHY1,MIB1,NUDT16,RNH1,ASCC2,PPP1R11,TRIP4,NUB1,SIRT2,EIF3E,AGO4,YTHDF2,UBE2S,SIAH2,UBE2D3,ZNF598,RNF123,FEM1B,ZSWIM8,SMURF2,ARRB1,SQSTM1,PSMF1,KLHL22,PTPN23,DNAJB12,LGMN,UBE2G1,DDX5,ASCC3,UBE2D1,LSM1,ZPR1,APEX1,CAPN2,WWP2,NGLY1,GSPT1,ARIH1,VPS37C,ITCH,FBXL7,ZFAND2B,BAG6,PSMD9,DXO,…	1.52954	0.313761	155	449
STRESS GRANULE ASSEMBLY%GOBP%GO:0034063	STRESS GRANULE ASSEMBLY%GOBP%GO:0034063	0.000724113	0.0100721	1	CSDE1,YTHDF3,YTHDF2,ATXN2,DYNC1H1,EIF2S1,G3BP1,UBAP2L,BICD1,ATXN2L	1.94099	0.688827	10	18
REGULATION OF CELLULAR CATABOLIC PROCESS%GOBP%GO:0031329	REGULATION OF CELLULAR CATABOLIC PROCESS%GOBP%GO:0031329	0.000726216	0.0100721	1	OPHN1,PTTG1IP,TRIM5,DNM1L,PAIP1,SAMD4A,LARP4B,GLMN,DAPK3,MTMR8,LRSAM1,EEF1A2,VPS35,DAGLB,PIK3CA,RNF14,RAB3GAP1,MTMR3,ATP13A2,YTHDF3,COMMD1,TFEB,PARK7,RCHY1,CAPNS1,RAB3GAP2,MAPKAPK2,VPS26B,PHAX,PTEN,RRAGC,WDR6,TSC2,NUB1,SIRT2,TIGAR,YTHDF2,EIF4G1,PRICKLE1,GTPBP1,ZSWIM8,DAPK1,PSMF1,FXR2,KLHL22,PAFAH1B2,EIF4G2,GIPC1,HSPB1,EIF4G3,LSM1,HSP90AA1,VDAC1,AMER1,HECTD1,ARAF,GBA,APEX1,SH3D19,RPL23,ARIH1,ITCH,…	1.40404	0.287962	150	454
CELLULAR RESPONSE TO ACID CHEMICAL%GOBP%GO:0071229	CELLULAR RESPONSE TO ACID CHEMICAL%GOBP%GO:0071229	0.000731707	0.0101125	1	PIK3CA,RRAGC,KLHL22,CAPN2,IPO5,LAMTOR3,RPTOR,LAMTOR1,CPEB4,MTOR,FYN,UBR1,UBR2	1.87248	0.644891	13	20
ORGANONITROGEN COMPOUND CATABOLIC PROCESS%GOBP%GO:1901565	ORGANONITROGEN COMPOUND CATABOLIC PROCESS%GOBP%GO:1901565	0.000784929	0.01081	1	ASB2,TGFB1I1,CRMP1,ASAH1,FBXL22,KCTD5,UBE2H,CDC34,NEU1,HSPA8,HECW2,RNF41,GLUD2,RNF115,LRSAM1,RLIM,SIAH1,CTSL,GNS,RNF14,DPYSL4,KCTD21,PSME4,CBS,RCHY1,MIB1,GOT1,NUDT16,ENTPD4,ASCC2,PPP1R11,TRIP4,NAGK,NUB1,SIRT2,DPYSL3,UBE2S,NT5C2,SIAH2,UBE2D3,ZNF598,RNF123,FEM1B,ZSWIM8,SMURF2,ARRB1,SQSTM1,PSMF1,DCTPP1,KLHL22,PDE4D,PTPN23,DNAJB12,LGMN,UBE2G1,ASCC3,UBE2D1,IDUA,HSP90AA1,GBA,CAPN2,WWP2,NGLY1,NUDT11,ARI…	1.38043	0.281059	160	499
PROTEOLYSIS%GOBP%GO:0006508	PROTEOLYSIS%GOBP%GO:0006508	0.000792393	0.0108453	1	ASB2,TGFB1I1,FBXL22,KCTD5,ADAM19,UBE2H,CDC34,PGPEP1,METAP2,VASH1,HECW2,RNF41,RNF115,RLIM,SIAH1,CTSL,RNF14,KCTD21,PSME4,RCHY1,DPP3,MIB1,ASCC2,PPP1R11,TRIP4,NUB1,SIRT2,UBE2S,CAPN7,SIAH2,UBE2D3,COPS4,ZNF598,RNF123,RNPEPL1,FEM1B,ZSWIM8,SMURF2,ARRB1,SQSTM1,PSMF1,KLHL22,PTPN23,DNAJB12,LGMN,UBE2G1,APEH,ASCC3,UBE2D1,THOP1,CAPN2,WWP2,NGLY1,ARIH1,VPS37C,ITCH,TPP1,FBXL7,COPS2,ZFAND2B,CLN5,CASP3,BAG6,PSMD9,O…	1.36487	0.278792	151	490
MACROMOLECULE CATABOLIC PROCESS%GOBP%GO:0009057	MACROMOLECULE CATABOLIC PROCESS%GOBP%GO:0009057	0.000793021	0.0108453	1	ASB2,TGFB1I1,FBXL22,KCTD5,PABPC4,UBE2H,CDC34,CSDE1,HSPA8,HECW2,SAMD4A,RNF41,RNF115,LRSAM1,RLIM,SIAH1,CTSL,CTIF,GNS,RNF14,KCTD21,PSME4,RCHY1,MIB1,NUDT16,RNH1,ASCC2,PPP1R11,TRIP4,NUB1,SIRT2,EIF3E,AGO4,YTHDF2,UBE2S,RB1CC1,SIAH2,UBE2D3,ZNF598,RNF123,FEM1B,ZSWIM8,SMURF2,ARRB1,SQSTM1,PSMF1,KLHL22,PTPN23,DNAJB12,LGMN,UBE2G1,DDX5,ASCC3,UBE2D1,IDUA,LSM1,ZPR1,HSP90AA1,APEX1,CAPN2,WWP2,NGLY1,GSPT1,ARIH1,VPS…	1.49567	0.304951	152	492
SUMOYLATION OF RNA BINDING PROTEINS%REACTOME%R-HSA-4570464.2	SUMOYLATION OF RNA BINDING PROTEINS%REACTOME%R-HSA-4570464.2	0.000797448	0.010868	-1	NUP85,AAAS,TPR,CBX8,NUP35,NUP62,NUP153,NUP54,NUP50,NUP155,RANBP2,RAE1,BMI1,PHC2,NUP88,HNRNPC,RING1,SUMO2,NOP58,NUP160,NUP210,NUP107,SUMO1,NDC1	-1.8394	-0.579548	24	40
CARDIAC CONDUCTION%GOBP%GO:0061337	CARDIAC CONDUCTION%GOBP%GO:0061337	0.000800512	0.010872	-1	DSG2,ATP1A2,CACNB2,DSC2,ATP1B1,ATP1A1,SLC9A1,DSP,ATP1B2,CTNNA3,JUP,CXADR,CACNA1C,KCNQ1,FKBP1B,CACNA2D1	-1.85753	-0.588667	16	39
REGULATION OF ION TRANSPORT%GOBP%GO:0043269	REGULATION OF ION TRANSPORT%GOBP%GO:0043269	0.000808516	0.0109429	-1	TRH,STC1,AHCYL1,THY1,VAMP8,ATP1A2,CACNB2,TESC,ATP2B1,ATP1B1,ATP1A1,KCNAB2,SLC9A1,ATP1B2,FXYD1,ANO6,EPB41,FGF13,EPHB2,SLC9A3R1,WFS1,CACNB3,DLG1,PACSIN3,ANK3,P2RX4,CRY2,NKX2-5,PDGFB,CACNA1C,WNK2,ATP1B3,NOS1AP,CAMK2B,CTNNB1,PML,KCNJ8,ATP2B4,KCNQ1,FXYD6,FKBP1B,TRIM27,CACNA2D1,CA2,ISCU,HRC,UTRN,VAMP7,JPH1,CHP1,CAV1,PDZK1	-1.56381	-0.395396	52	166
HIF-1-ALPHA TRANSCRIPTION FACTOR NETWORK%PATHWAY INTERACTION DATABASE NCI-NATURE CURATED DATA%HIF-1-ALPHA TRANSCRIPTION FACTOR NETWORK	HIF-1-ALPHA TRANSCRIPTION FACTOR NETWORK%PATHWAY INTERACTION DATABASE NCI-NATURE CURATED DATA%HIF-1-ALPHA TRANSCRIPTION FACTOR NETWORK	0.000819269	0.0109893	-1	HK2,ENG,SLC2A1,FECH,NDRG1,SP1,PFKL,ENO1,JUN,ARNT,FURIN,BNIP3,LDHA,NCOA1,SERPINE1	-1.8174	-0.588751	15	35
ACTIVATION OF NF-KAPPAB IN B CELLS%REACTOME%R-HSA-1169091.1	ACTIVATION OF NF-KAPPAB IN B CELLS%REACTOME%R-HSA-1169091.1	0.000820345	0.0109893	1	PSME4,PSMF1,PSMD9,PSME3,PSMD5,NFKB1,PSMA5,PSMB6,IKBKB,PSMD4,PSMA1,PSMA7,PSMB3,PSMB4,UBA52,REL,PSMA6,PSMD11,MALT1,PSMD1,MAP3K7	1.82563	0.49993	21	53
HEDGEHOG 'ON' STATE%REACTOME DATABASE ID RELEASE 77%5632684	HEDGEHOG 'ON' STATE%REACTOME DATABASE ID RELEASE 77%5632684	0.000820345	0.0109893	1	PSME4,SMURF2,ARRB1,PSMF1,ITCH,PSMD9,PSME3,PSMD5,PSMA5,PSMB6,PSMD4,PSMA1,CUL3,PSMA7,PSMB3,PSMB4,UBA52	1.83073	0.501326	17	53
APC C:CDC20 MEDIATED DEGRADATION OF SECURIN%REACTOME%R-HSA-174154.2	APC C:CDC20 MEDIATED DEGRADATION OF SECURIN%REACTOME%R-HSA-174154.2	0.000826674	0.0110289	1	PSME4,UBE2S,PSMF1,UBE2D1,PSMD9,PSME3,UBE2E1,PSMD5,PSMA5,ANAPC5,PSMB6,PSMD4,PSMA1,ANAPC7,PSMA7,PSMB3,PSMB4,ANAPC1,UBA52,ANAPC4	1.82094	0.493557	20	56
ION TRANSMEMBRANE TRANSPORT%GOBP%GO:0034220	ION TRANSMEMBRANE TRANSPORT%GOBP%GO:0034220	0.000834608	0.0110289	-1	SLC6A4,ATP1A2,ATP2B1,ATP1B1,ATP1A1,SLC4A8,SLC9A1,ATP1B2,ANO6,ITPR1,SLC39A10,SFXN3,SLC39A6,CACNB3,ITPR3,ATP7A,P2RX4,CHERP,CACNA1C,ATP1B3,STOML2,SLC1A5,SLC16A7,KCNJ8,ATP2B4,KCNQ1,SLC1A4,SLC25A23,ABCB6,SLC20A2,CACNA2D1,FGF2,GAS6,ATP11B,ATP6V1A,SLC39A11	-1.59108	-0.411181	36	139
GPCR DOWNSTREAM SIGNALLING%REACTOME DATABASE ID RELEASE 77%388396	GPCR DOWNSTREAM SIGNALLING%REACTOME DATABASE ID RELEASE 77%388396	0.000838106	0.0110289	-1	GNG5,TRH,NRAS,ADRA2B,AHCYL1,GRK5,GNAZ,GNB4,ARHGEF5,ITPR1,GNAQ,GNA12,ARHGEF16,ADCY9,GNAI3,LPAR2,ITPR3,GNB1,GNAS,NMB,PAK1,GNAI2,HRAS,GNB2,RGS19,CAMK2B,PRKCD,GABBR1,PPP1R1B	-1.57565	-0.40898	29	134
REGULATION OF METAL ION TRANSPORT%GOBP%GO:0010959	REGULATION OF METAL ION TRANSPORT%GOBP%GO:0010959	0.000841279	0.0110289	-1	STC1,AHCYL1,THY1,ATP1A2,CACNB2,TESC,ATP2B1,ATP1B1,ATP1A1,KCNAB2,SLC9A1,ATP1B2,FXYD1,ANO6,EPB41,FGF13,SLC9A3R1,WFS1,CACNB3,DLG1,PACSIN3,ANK3,P2RX4,NKX2-5,PDGFB,CACNA1C,WNK2,ATP1B3,NOS1AP,CAMK2B,CTNNB1,PML,ATP2B4,KCNQ1,FXYD6,FKBP1B,TRIM27,CACNA2D1,ISCU,HRC,UTRN	-1.60928	-0.420522	41	126
APC C:CDH1 MEDIATED DEGRADATION OF CDC20 AND OTHER APC C:CDH1 TARGETED PROTEINS IN LATE MITOSIS EARLY G1%REACTOME%R-HSA-174178.3	APC C:CDH1 MEDIATED DEGRADATION OF CDC20 AND OTHER APC C:CDH1 TARGETED PROTEINS IN LATE MITOSIS EARLY G1%REACTOME%R-HSA-174178.3	0.000846262	0.0110289	1	PSME4,UBE2S,PSMF1,UBE2D1,PSMD9,PSME3,UBE2E1,PSMD5,PSMA5,ANAPC5,PSMB6,PSMD4,PSMA1,ANAPC7,PSMA7,PSMB3,PSMB4,ANAPC1,UBA52,ANAPC4	1.74198	0.468357	20	59
REGULATION OF MEMBRANE POTENTIAL%GOBP%GO:0042391	REGULATION OF MEMBRANE POTENTIAL%GOBP%GO:0042391	0.000849738	0.0110289	-1	DSG2,MPP2,ATP1A2,CACNB2,DSC2,ATP1B1,ATP1A1,KCNAB2,SLC4A8,SLC9A1,DSP,ATP1B2,FXYD1,CTNNA3,JUP,FGF13,GNAQ,STX1B,DCN,CACNB3,DLG1,ANK3,NDUFS1,P2RX4,CXADR,CACNA1C,ATP1B3,STOML2,NOS1AP,BNIP3,KCNJ8,KCNQ1,GNA14,CACNA2D1,PIEZO1,GNA11,CD36,SRC,CNTNAP1,CAV1	-1.61992	-0.426777	40	119
O-GLYCOSYLATION OF TSR DOMAIN-CONTAINING PROTEINS%REACTOME%R-HSA-5173214.1	O-GLYCOSYLATION OF TSR DOMAIN-CONTAINING PROTEINS%REACTOME%R-HSA-5173214.1	0.000853388	0.0110289	-1	ADAMTSL4,ADAMTS7,ADAMTS3,ADAMTSL1,ADAMTS6,THSD4,ADAMTS19,ADAMTS9,ADAMTS1,THBS1,ADAMTS14,ADAMTS15,ADAMTS12	-1.88618	-0.710586	13	18
HDMS DEMETHYLATE HISTONES%REACTOME DATABASE ID RELEASE 77%3214842	HDMS DEMETHYLATE HISTONES%REACTOME DATABASE ID RELEASE 77%3214842	0.000853388	0.0110289	-1	KDM2B,PHF8,KDM3B,KDM4B,PHF2,KDM5B,KDM3A,KDM5A,KDM5C,KDM4C,KDM1A	-1.88009	-0.708293	11	18
REGULATION OF HEMOSTASIS%GOBP%GO:1900046	REGULATION OF HEMOSTASIS%GOBP%GO:1900046	0.000853388	0.0110289	-1	ANO6,EPHB2,CD9,ST3GAL4,VTN,PDGFB,SERPINE2,PRKCD,THBS1,FGG,SERPINE1,CAV1,PLAT	-1.89123	-0.712491	13	18
REGULATION OF BLOOD COAGULATION%GOBP%GO:0030193	REGULATION OF BLOOD COAGULATION%GOBP%GO:0030193	0.000853388	0.0110289	-1	ANO6,EPHB2,CD9,ST3GAL4,VTN,PDGFB,SERPINE2,PRKCD,THBS1,FGG,SERPINE1,CAV1,PLAT	-1.89123	-0.712491	13	18
MITOCHONDRIAL MEMBRANE ORGANIZATION%GOBP%GO:0007006	MITOCHONDRIAL MEMBRANE ORGANIZATION%GOBP%GO:0007006	0.000854214	0.0110289	1	APOOL,ALKBH7,MFN2,RHOT2,UQCC3,MFN1,TIMM8B,TIMM13,HSP90AA1,BCL2L1,SPG7,MOAP1,TIMM50,BAD,GSK3B,TMEM11,SLC35F6,SLC25A5,TOMM22,HSPA9,SLC25A4,APOO,ZNF205,CHCHD3,NMT1,TIMM10B,CHCHD10,VDAC2,ROMO1,HEBP2,SAMM50,BCS1L,CHCHD6	1.75922	0.466605	33	63
DEFECTIVE B3GALTL CAUSES PETERS-PLUS SYNDROME (PPS)%REACTOME DATABASE ID RELEASE 77%5083635	DEFECTIVE B3GALTL CAUSES PETERS-PLUS SYNDROME (PPS)%REACTOME DATABASE ID RELEASE 77%5083635	0.00085955	0.0110406	-1	ADAMTSL4,ADAMTS7,ADAMTS3,ADAMTSL1,ADAMTS6,THSD4,ADAMTS19,ADAMTS9,ADAMTS1,THBS1,ADAMTS14,ADAMTS15,ADAMTS12	-1.918	-0.731717	13	17
HALLMARK_APICAL_SURFACE%MSIGDB_C2%HALLMARK_APICAL_SURFACE	HALLMARK_APICAL_SURFACE%MSIGDB_C2%HALLMARK_APICAL_SURFACE	0.000863558	0.0110406	-1	THY1,FLOT2,PLAUR,ADAM10,NCOA6,B4GALT1,LYN,SRPX,AKAP7	-1.9296	-0.745663	9	16
POTASSIUM CHANNELS%REACTOME%R-HSA-1296071.2	POTASSIUM CHANNELS%REACTOME%R-HSA-1296071.2	0.000863558	0.0110406	-1	GNG5,KCNAB2,GNB4,GNB1,GNB2,GABBR1,KCNJ8,KCNQ1	-1.94189	-0.750411	8	16
LEUKOCYTE CELL-CELL ADHESION%GOBP%GO:0007159	LEUKOCYTE CELL-CELL ADHESION%GOBP%GO:0007159	0.000870777	0.0110967	-1	ADD2,F11R,ICAM1,BMP7,CD44,SEMA4D	-1.9219	-0.754565	6	15
VACUOLE ORGANIZATION%GOBP%GO:0007033	VACUOLE ORGANIZATION%GOBP%GO:0007033	0.000901713	0.011414	1	MAP1LC3B,HOOK2,ATG101,ATP13A2,TFEB,MFN2,RB1CC1,CHMP3,ATG5,GBA,TPP1,CLN5,WIPI1,ATG16L1,WDR45,ARSB,LAMTOR1,VPS4A,ATG14,ATG7,AKTIP,MTOR,ATG9A,GRN,GABARAPL2,NSFL1C,TRAPPC8,VPS33A,ATG12,ATP2A2,VPS18,EMC6	1.77259	0.453497	32	77
POSITIVE REGULATION OF LOCOMOTION%GOBP%GO:0040017	POSITIVE REGULATION OF LOCOMOTION%GOBP%GO:0040017	0.000902993	0.011414	-1	MOSPD2,LAMB1,THY1,CD99,ICAM1,LAMC2,SH3RF2,ANO6,ITGA6,ADAM17,EPHB2,STX3,ADAM10,MYO1C,NRP2,SRPX2,PODXL,TJP1,ROR2,FN1,COL1A1,ZNF609,SEMA4B,P2RX4,SP1,PIK3C2A,NRP1,WNT11,PAK1,MMP14,HRAS,SEMA4D,VTN,PDGFB,SEMA3C,ADAMTS1,SEMA4C,MAZ,IGFBP5,THBS1,PDGFC,RHOA,ADAM9,RDX,CIB1,FGF2,RAC1,JAM3,FAM83H,ARF6,SERPINE1,GAS6,SRC,RREB1,SDCBP,CAV1,TGFBR1,STX4,AGT,S100A11	-1.53213	-0.376933	60	211
ALZHEIMER DISEASE-AMYLOID SECRETASE PATHWAY%PANTHER PATHWAY%P00003	ALZHEIMER DISEASE-AMYLOID SECRETASE PATHWAY%PANTHER PATHWAY%P00003	0.000907304	0.011414	-1	PCK2,CACNB2,CACNB2,ADAM17,ADAM17,ADAM10,ADAM10,ADAM10,CACNA1C,CACNA1C,CACNA1C,WNK2,FURIN,FURIN,PRKCD,PRKCD,PCSK6,PCSK6,ADAM9,ADAM9,MAPK6,MAPK6,PCSK5	-1.74896	-0.500358	23	69
REGULATION OF PROTEIN LOCALIZATION TO CELL PERIPHERY%GOBP%GO:1904375	REGULATION OF PROTEIN LOCALIZATION TO CELL PERIPHERY%GOBP%GO:1904375	0.000907304	0.011414	-1	VAMP8,AKAP5,EPB41L2,EPB41,EPHB2,STX3,ARHGEF16,LRP1,AP2M1,DLG1,CNST,NUMA1,ACSL3,MMP14,HRAS,GBP1,ATP2B4,RHOQ,LDLRAP1,RHOG,RAP1A,CIB1,ARF6,ZDHHC5,STX4,GPC4,GNAI1,ATP2C1,INS,ACTB,GPSM2,PLK1,NUMB,TGFB1	-1.76154	-0.503955	34	69
POSITIVE REGULATION OF CELLULAR AMIDE METABOLIC PROCESS%GOBP%GO:0034250	POSITIVE REGULATION OF CELLULAR AMIDE METABOLIC PROCESS%GOBP%GO:0034250	0.000931677	0.0116832	1	HABP4,EEF2,SAMD4A,LARP4B,TRUB2,YTHDF3,EIF5A,EIF3C,EIF3E,YTHDF2,EIF4G1,RPUSD4,FXR2,LARP4,METTL5,NCK2,LARP1,CASP3,NGRN,RBM3,AGO2,EIF2B5,COA3,CNBP,RPL26,EIF3D,MTOR,EIF6,USP16,C1QBP	1.77638	0.441105	30	90
ORGANELLE LOCALIZATION BY MEMBRANE TETHERING%GOBP%GO:0140056	ORGANELLE LOCALIZATION BY MEMBRANE TETHERING%GOBP%GO:0140056	0.000949517	0.011869	-1	AHCYL1,VAMP8,STXBP2,STXBP1,STXBP3,STX1B,STX3,RAB13,STX17,STX2,SNAP25,RAB8B,VAPB,RAB10,STX4,PDZD8,RAB8A	-1.82803	-0.561154	17	46
THROMBOXANE A2 RECEPTOR SIGNALING%PATHWAY INTERACTION DATABASE NCI-NATURE CURATED DATA%THROMBOXANE A2 RECEPTOR SIGNALING	THROMBOXANE A2 RECEPTOR SIGNALING%PATHWAY INTERACTION DATABASE NCI-NATURE CURATED DATA%THROMBOXANE A2 RECEPTOR SIGNALING	0.000996347	0.0123365	-1	YES1,ICAM1,GNAQ,GNA12,SLC9A3R1,GNB1,LYN,GNAI2,PRKCD,GNA14,RHOA,RAC1,GNA11,SRC,GNA13	-1.85852	-0.63305	15	28
NEUROTRANSMITTER SECRETION%GOBP%GO:0007269	NEUROTRANSMITTER SECRETION%GOBP%GO:0007269	0.000996347	0.0123365	-1	STXBP2,STXBP1,LIN7C,STXBP3,STX1B,STX3,SLC32A1,PIP5K1C,PDZD11,STX2,SNAP25,SNAP23,STX4,LIN7A,PCLO,SYT7	-1.8468	-0.629059	16	28
SIGNAL RELEASE FROM SYNAPSE%GOBP%GO:0099643	SIGNAL RELEASE FROM SYNAPSE%GOBP%GO:0099643	0.000996347	0.0123365	-1	STXBP2,STXBP1,LIN7C,STXBP3,STX1B,STX3,SLC32A1,PIP5K1C,PDZD11,STX2,SNAP25,SNAP23,STX4,LIN7A,PCLO,SYT7	-1.8468	-0.629059	16	28
NEGATIVE REGULATION OF DEVELOPMENTAL PROCESS%GOBP%GO:0051093	NEGATIVE REGULATION OF DEVELOPMENTAL PROCESS%GOBP%GO:0051093	0.00101458	0.0125228	-1	SLC6A4,THY1,HSPG2,ATF2,LOXL3,EFNB3,FGF13,ADAMTS7,FBN1,BMP7,COL5A1,LOXL2,GDF15,HEY2,SPRY3,DCN,SEMA4B,SPRY1,SFRP1,SFRP5,GTF2I,WNT11,VASN,EMILIN1,SEMA4D,HDAC1,NKX2-5,DPF2,PDGFB,ADAMTS9,SEMA3C,EPN1,MAD2L2,MECP2,ADAMTS1,GBP1,BNIP3,SEMA4C,CTNNB1,PML,THBS1,CHRD,ECM1,KRIT1,ATP2B4,IGF2,PDCD4,THOC1,HNRNPU,COL4A2,ROBO2,CDK6,CIB1,NOG,CTR9,RUNX1T1,SERPINE1,GAS6,ADAMTS12,CAV1,SUZ12,TGFBR1,CDKN1B,NELFB,ITGB1BP1…	-1.49652	-0.363895	68	239
CLASS B 2 (SECRETIN FAMILY RECEPTORS)%REACTOME%R-HSA-373080.2	CLASS B 2 (SECRETIN FAMILY RECEPTORS)%REACTOME%R-HSA-373080.2	0.00104493	0.0128569	-1	GNG5,FZD6,GNB4,CD55,GNB1,GNAS,WNT11,GNB2	-1.877	-0.736938	8	15
REGULATION OF APOPTOSIS%REACTOME%R-HSA-169911.2	REGULATION OF APOPTOSIS%REACTOME%R-HSA-169911.2	0.00108225	0.0132745	1	PSME4,PSMF1,PSMD9,PSME3,ARHGAP10,PSMD5,PSMA5,PSMB6,PSMD4,PSMA1,PSMA7,PSMB3,PSMB4,UBA52,PSMA6,PSMD11,PAK2,PSMD1	1.88399	0.53529	18	45
THE ROLE OF GTSE1 IN G2 M PROGRESSION AFTER G2 CHECKPOINT%REACTOME DATABASE ID RELEASE 77%8852276	THE ROLE OF GTSE1 IN G2 M PROGRESSION AFTER G2 CHECKPOINT%REACTOME DATABASE ID RELEASE 77%8852276	0.0010914	0.0133327	1	PSME4,PSMF1,HSP90AA1,PSMD9,PSME3,PSMD5,PSMA5,PSMB6,PSMD4,HSP90AB1,PSMA1,PSMA7,PSMB3,FKBPL,PSMB4,UBA52,CDK1,PSMA6,PSMD11,CCNB1,MAPRE1,PSMD1	1.8068	0.504998	22	49
CELLULAR RESPONSE TO HYPOXIA%REACTOME%R-HSA-1234174.2	CELLULAR RESPONSE TO HYPOXIA%REACTOME%R-HSA-1234174.2	0.00109379	0.0133327	1	PSME4,UBE2D3,PSMF1,HIF1AN,UBE2D1,PSMD9,PSME3,PSMD5,PSMA5,PSMB6,PSMD4,CUL2,PSMA1,PSMA7,PSMB3,PSMB4,UBA52,AJUBA,CREBBP	1.78508	0.488827	19	53
NEGATIVE REGULATION OF CATABOLIC PROCESS%GOBP%GO:0009895	NEGATIVE REGULATION OF CATABOLIC PROCESS%GOBP%GO:0009895	0.00112528	0.0135934	1	OPHN1,RILP,PIN1,PAIP1,MTMR8,PIK3CA,ATP13A2,PARK7,MAPKAPK2,PHAX,WDR6,TSC2,SIRT2,TIGAR,EIF4G1,SNX3,PSMF1,KLHL22,EIF4G2,GIPC1,EIF4G3,SNX12,RPL23,PABPC1,LARP1,BAG6,RPL11,YBX1,FEZ2,EIF4E,SNCA,CLEC16A,GIT1,OGT,USP25,ATG7,UBXN1,MTMR9,TAB2,GOLGA2,MTOR,CST3,CTSA,DAP,KDM4A,HSP90AB1,RBM24,RPS7,GABARAPL2,EIF3H	1.54635	0.356607	50	152
NEGATIVE REGULATION OF BLOOD VESSEL MORPHOGENESIS%GOBP%GO:2000181	NEGATIVE REGULATION OF BLOOD VESSEL MORPHOGENESIS%GOBP%GO:2000181	0.00112903	0.0135934	-1	HSPG2,ATF2,DCN,GTF2I,EMILIN1,ADAMTS9,EPN1,MECP2,ADAMTS1,CTNNB1,PML,THBS1,KRIT1,ATP2B4,COL4A2,SERPINE1	-1.81189	-0.57807	16	38
NEGATIVE REGULATION OF ANGIOGENESIS%GOBP%GO:0016525	NEGATIVE REGULATION OF ANGIOGENESIS%GOBP%GO:0016525	0.00112903	0.0135934	-1	HSPG2,ATF2,DCN,GTF2I,EMILIN1,ADAMTS9,EPN1,MECP2,ADAMTS1,CTNNB1,PML,THBS1,KRIT1,ATP2B4,COL4A2,SERPINE1	-1.81189	-0.57807	16	38
NEGATIVE REGULATION OF VASCULATURE DEVELOPMENT%GOBP%GO:1901343	NEGATIVE REGULATION OF VASCULATURE DEVELOPMENT%GOBP%GO:1901343	0.00112903	0.0135934	-1	HSPG2,ATF2,DCN,GTF2I,EMILIN1,ADAMTS9,EPN1,MECP2,ADAMTS1,CTNNB1,PML,THBS1,KRIT1,ATP2B4,COL4A2,SERPINE1	-1.81189	-0.57807	16	38
INFLAMMATION MEDIATED BY CHEMOKINE AND CYTOKINE SIGNALING PATHWAY%PANTHER PATHWAY%P00031	INFLAMMATION MEDIATED BY CHEMOKINE AND CYTOKINE SIGNALING PATHWAY%PANTHER PATHWAY%P00031	0.00113766	0.0136554	-1	MYH6,MYH6,GNG5,GNG5,NRAS,NRAS,PLCD1,PLCD1,COL14A1,COL14A1,COL6A2,COL6A2,KRAS,COL6A1,COL6A1,ITPR1,ITPR1,ITPR1,COL6A3,COL6A3,GNAQ,GNAQ,GNAQ,MYH8,MYH8,GNAI3,GNAI3,GNAI3,MYH3,MYH3,ITPR3,ITPR3,PAK1,PAK1,GNAI2,GNAI2,JUN,JUN,RRAS2,PLCL2,PLCL2,CAMK2B,CAMK2B,MYH15,PAK4,PAK4,PAK4,STAT6,GNA14,GNA14,RHOA,RHOA,COL6A6,RHOG,RHOG,JUND,JUND,RAC1,RAC1,RAC1,GNA11,GNA11,RAC3,MYH2,MYH2,GNAI1,GNAI1,GNAI1,MYH7B,MYH7B,T…	-1.49525	-0.362767	98	246
NEGATIVE REGULATION OF SECRETION%GOBP%GO:0051048	NEGATIVE REGULATION OF SECRETION%GOBP%GO:0051048	0.00114905	0.0137343	-1	TRH,ADRA2B,VAMP8,RAB11FIP1,STXBP3,CYP51A1,SFRP1,ERBB3,RAP1B,RHBDF1,RAP1A	-1.79561	-0.580266	11	36
REGULATION OF ACTION POTENTIAL%GOBP%GO:0098900	REGULATION OF ACTION POTENTIAL%GOBP%GO:0098900	0.00115264	0.0137343	-1	DSG2,DSC2,KCNAB2,DSP,CTNNA3,JUP,FGF13,CACNB3,DLG1,CXADR,CACNA1C,NOS1AP	-1.83111	-0.607015	12	32
ION TRANSPORT%GOBP%GO:0006811	ION TRANSPORT%GOBP%GO:0006811	0.00115473	0.0137343	-1	SLC16A3,SLC6A4,CYBRD1,ATP1A2,CACNB2,ATP2B1,ATP1B1,ATP1A1,SLC4A8,SLC9A1,FOLR1,ATP1B2,FXYD1,ANO6,FGF13,SLC4A7,ITPR1,SLC39A10,SLC9A3R1,SFXN3,LLGL2,SLC39A6,CACNB3,ITPR3,ATP7A,P2RX4,SLC32A1,CHERP,LMTK2,CACNA1C,ATP1B3,STOML2,SLC1A5,SLC16A7,KCNJ8,ATP2B4,KCNQ1,HEPH,RALBP1,SLC1A4,SLC25A23,ABCB6,SLC20A2,CACNA2D1,FGF2,RACGAP1,PIEZO1,JPH1,GAS6,CD36,ATP11B,ATP6V1A,CNNM4,CHP1,CAV1,SLC39A11,PDZK1,SNAP23	-1.52029	-0.372407	58	222
FATTY ACYL-COA BIOSYNTHESIS%REACTOME DATABASE ID RELEASE 77%75105	FATTY ACYL-COA BIOSYNTHESIS%REACTOME DATABASE ID RELEASE 77%75105	0.00118604	0.0140641	-1	SLC27A3,TECRL,HSD17B12,ACSL3,HACD3,CBR4,HACD2,ACSL4,PPT1,HACD1,SLC25A1,ACSF3,SCD5,TECR,ACSL1,HSD17B8	-1.86505	-0.685942	16	20
RAB REGULATION OF TRAFFICKING%REACTOME DATABASE ID RELEASE 77%9007101	RAB REGULATION OF TRAFFICKING%REACTOME DATABASE ID RELEASE 77%9007101	0.0012158	0.0143736	1	MAP1LC3B,DENND1B,DENND5A,RABEP1,TBC1D17,RAB3GAP1,TRAPPC3,RAB3GAP2,RAB9B,ALS2,TSC2,TRAPPC1,RABGEF1,DENND5B,TRAPPC13,DENND4C,DENND6A,TRAPPC9,DENND4A,GDI2,TBC1D10A,TRAPPC12,RABGAP1,TRAPPC11,TBC1D10B,GDI1,RAB4A,GABARAPL2,TRAPPC8,AKT3,RAB3IP	1.6996	0.428811	31	82
SUMOYLATION OF UBIQUITINYLATION PROTEINS%REACTOME DATABASE ID RELEASE 77%3232142	SUMOYLATION OF UBIQUITINYLATION PROTEINS%REACTOME DATABASE ID RELEASE 77%3232142	0.0013221	0.0155833	-1	NUP85,AAAS,TPR,NUP35,NUP62,PML,NUP153,NUP54,TRIM27,NUP50,NUP155,RANBP2,RAE1,NUP88,NUP160,NUP210,NUP107,SUMO1,NDC1,NUP214,PIAS1,NUP133	-1.82528	-0.613412	22	30
REGULATION OF ACTIVATED PAK-2P34 BY PROTEASOME MEDIATED DEGRADATION%REACTOME DATABASE ID RELEASE 77%211733	REGULATION OF ACTIVATED PAK-2P34 BY PROTEASOME MEDIATED DEGRADATION%REACTOME DATABASE ID RELEASE 77%211733	0.0013369	0.0156333	1	PSME4,PSMF1,PSMD9,PSME3,PSMD5,PSMA5,PSMB6,PSMD4,PSMA1,PSMA7,PSMB3,PSMB4,UBA52,PSMA6,PSMD11,PAK2,PSMD1	1.84908	0.534519	17	42
VPU MEDIATED DEGRADATION OF CD4%REACTOME%R-HSA-180534.1	VPU MEDIATED DEGRADATION OF CD4%REACTOME%R-HSA-180534.1	0.0013369	0.0156333	1	PSME4,PSMF1,PSMD9,PSME3,PSMD5,PSMA5,PSMB6,PSMD4,PSMA1,PSMA7,PSMB3,PSMB4,UBA52,PSMA6,PSMD11	1.8261	0.527876	15	42
VIF-MEDIATED DEGRADATION OF APOBEC3G%REACTOME%R-HSA-180585.1	VIF-MEDIATED DEGRADATION OF APOBEC3G%REACTOME%R-HSA-180585.1	0.00134626	0.0156333	1	PSME4,PSMF1,PSMD9,PSME3,PSMD5,PSMA5,PSMB6,PSMD4,PSMA1,PSMA7,PSMB3,PSMB4,UBA52,PSMA6,PSMD11	1.85573	0.533535	15	43
SCF-BETA-TRCP MEDIATED DEGRADATION OF EMI1%REACTOME%R-HSA-174113.3	SCF-BETA-TRCP MEDIATED DEGRADATION OF EMI1%REACTOME%R-HSA-174113.3	0.00134626	0.0156333	1	PSME4,PSMF1,PSMD9,PSME3,PSMD5,PSMA5,PSMB6,PSMD4,PSMA1,PSMA7,PSMB3,PSMB4,UBA52,PSMA6,PSMD11	1.83337	0.527105	15	43
DEGRADATION OF AXIN%REACTOME%R-HSA-4641257.2	DEGRADATION OF AXIN%REACTOME%R-HSA-4641257.2	0.00134626	0.0156333	1	PSME4,SMURF2,PSMF1,PSMD9,PSME3,PSMD5,PSMA5,PSMB6,PSMD4,PSMA1,PSMA7,PSMB3,PSMB4,UBA52,PSMA6,PSMD11,PSMD1,TNKS	1.88518	0.542	18	43
AUTODEGRADATION OF CDH1 BY CDH1:APC C%REACTOME%R-HSA-174084.4	AUTODEGRADATION OF CDH1 BY CDH1:APC C%REACTOME%R-HSA-174084.4	0.00136799	0.0158388	1	UBE2S,PSMF1,UBE2D1,PSMD9,PSME3,UBE2E1,PSMD5,PSMA5,ANAPC5,PSMB6,PSMD4,PSMA1,ANAPC7,PSMA7,PSMB3,PSMB4,ANAPC1,UBA52,ANAPC4,PSMA6	1.74078	0.472525	20	55
POSITIVE REGULATION OF CELL ADHESION%GOBP%GO:0045785	POSITIVE REGULATION OF CELL ADHESION%GOBP%GO:0045785	0.00140174	0.0161818	-1	THY1,YES1,F11R,JUP,BMP7,FLOT2,PLAUR,STX3,APOA1,CD55,PODXL,TJP1,CD44,FN1,SIRPA,ANK3,NPNT,ST3GAL4,LYN,SFRP1,NRP1,PDGFB,FLOT1,HLA-A,CHRD,FGG,IGF2,RHOA,JAK1,ADAM9,S100A10,NKAP,UTRN,CDK6,CIB1,RAC1,PIEZO1,CD36,SRC,RREB1,CAV1,STX4,RAC3	-1.57249	-0.409345	43	131
APC:CDC20 MEDIATED DEGRADATION OF CELL CYCLE PROTEINS PRIOR TO SATISFATION OF THE CELL CYCLE CHECKPOINT%REACTOME%R-HSA-179419.2	APC:CDC20 MEDIATED DEGRADATION OF CELL CYCLE PROTEINS PRIOR TO SATISFATION OF THE CELL CYCLE CHECKPOINT%REACTOME%R-HSA-179419.2	0.00141044	0.016187	1	PSME4,UBE2S,PSMF1,UBE2D1,PSMD9,PSME3,UBE2E1,PSMD5,PSMA5,ANAPC5,PSMB6,PSMD4,PSMA1,ANAPC7,PSMA7,PSMB3,PSMB4,ANAPC1,UBA52,ANAPC4,CDK1,PSMA6	1.72439	0.463626	22	59
CDC20:PHOSPHO-APC C MEDIATED DEGRADATION OF CYCLIN A%REACTOME DATABASE ID RELEASE 77%174184	CDC20:PHOSPHO-APC C MEDIATED DEGRADATION OF CYCLIN A%REACTOME DATABASE ID RELEASE 77%174184	0.00141044	0.016187	1	PSME4,UBE2S,PSMF1,UBE2D1,PSMD9,PSME3,UBE2E1,PSMD5,PSMA5,ANAPC5,PSMB6,PSMD4,PSMA1,ANAPC7,PSMA7,PSMB3,PSMB4,ANAPC1,UBA52,ANAPC4,CDK1,PSMA6	1.72439	0.463626	22	59
POSITIVE REGULATION OF CELLULAR COMPONENT MOVEMENT%GOBP%GO:0051272	POSITIVE REGULATION OF CELLULAR COMPONENT MOVEMENT%GOBP%GO:0051272	0.00141698	0.0162147	-1	MOSPD2,LAMB1,THY1,CD99,ICAM1,LAMC2,SH3RF2,ANO6,ITGA6,ADAM17,EPHB2,ADAM10,MYO1C,NRP2,SRPX2,PODXL,TJP1,ROR2,FN1,COL1A1,ZNF609,SEMA4B,LYN,P2RX4,SP1,PIK3C2A,NRP1,WNT11,PAK1,MMP14,HRAS,SEMA4D,VTN,PDGFB,SEMA3C,ADAMTS1,SEMA4C,STK11,MAZ,IGFBP5,THBS1,PDGFC,RHOA,ADAM9,RDX,TUBB2B,CIB1,FGF2,RAC1,JAM3,FAM83H,ARF6,SERPINE1,GAS6,SRC,RREB1,SDCBP,CAV1,TGFBR1,STX4,AGT,S100A11	-1.50575	-0.370049	62	213
POSITIVE REGULATION OF CELL MOTILITY%GOBP%GO:2000147	POSITIVE REGULATION OF CELL MOTILITY%GOBP%GO:2000147	0.00143024	0.0163189	-1	MOSPD2,LAMB1,THY1,CD99,ICAM1,LAMC2,SH3RF2,ANO6,ITGA6,ADAM17,EPHB2,ADAM10,MYO1C,NRP2,SRPX2,PODXL,TJP1,ROR2,FN1,COL1A1,ZNF609,SEMA4B,P2RX4,SP1,PIK3C2A,NRP1,WNT11,PAK1,MMP14,HRAS,SEMA4D,VTN,PDGFB,SEMA3C,ADAMTS1,SEMA4C,MAZ,IGFBP5,THBS1,PDGFC,RHOA,ADAM9,RDX,CIB1,FGF2,RAC1,JAM3,FAM83H,ARF6,SERPINE1,GAS6,SRC,RREB1,SDCBP,CAV1,TGFBR1,STX4,AGT,S100A11	-1.51277	-0.372972	59	207
NEGATIVE REGULATION OF SECRETION BY CELL%GOBP%GO:1903531	NEGATIVE REGULATION OF SECRETION BY CELL%GOBP%GO:1903531	0.00146987	0.0167224	-1	TRH,ADRA2B,VAMP8,RAB11FIP1,STXBP3,CYP51A1,SFRP1,RAP1B,RHBDF1,RAP1A	-1.79854	-0.586254	10	34
CALCIUM ION TRANSMEMBRANE TRANSPORT%GOBP%GO:0070588	CALCIUM ION TRANSMEMBRANE TRANSPORT%GOBP%GO:0070588	0.00147469	0.0167287	-1	ATP2B1,ANO6,ITPR1,CACNB3,ITPR3,P2RX4,CHERP,CACNA1C,STOML2,ATP2B4,SLC25A23,CACNA2D1,FGF2,GAS6	-1.7803	-0.576734	14	35
POSTTRANSLATIONAL REGULATION OF ADHERENS JUNCTION STABILITY AND DISSASSEMBLY%PATHWAY INTERACTION DATABASE NCI-NATURE CURATED DATA%POSTTRANSLATIONAL REGULATION OF ADHERENS JUNCTION STABILITY AND DISSASSEMBLY	POSTTRANSLATIONAL REGULATION OF ADHERENS JUNCTION STABILITY AND DISSASSEMBLY%PATHWAY INTERACTION DATABASE NCI-NATURE CURATED DATA%POSTTRANSLATIONAL REGULATION OF ADHERENS JUNCTION STABILITY AND DISSASSEMBLY	0.00148197	0.0167423	-1	DSP,JUP,CDH1,GNA12,ADAM10,CTNNA1,IQGAP1,ZBTB33,HRAS,CTNNB1,IGF2,RAC1,ARF6,SRC,GNA13,CTNND1,CDC42,CDH2	-1.81067	-0.600237	18	32
SUMOYLATION OF SUMOYLATION PROTEINS%REACTOME%R-HSA-4085377.3	SUMOYLATION OF SUMOYLATION PROTEINS%REACTOME%R-HSA-4085377.3	0.00148441	0.0167423	-1	NUP85,AAAS,TPR,NUP35,NUP62,NUP153,NUP54,NUP50,NUP155,RANBP2,RAE1,NUP88,SUMO2,NUP160,NUP210,NUP107,SUMO1,NDC1	-1.83149	-0.618643	18	29
NEUTROPHIL DEGRANULATION%REACTOME DATABASE ID RELEASE 77%6798695	NEUTROPHIL DEGRANULATION%REACTOME DATABASE ID RELEASE 77%6798695	0.00149533	0.0168171	-1	NRAS,MOSPD2,VAMP8,SERPINB1,METTL7A,RAB27A,KCNAB2,DSP,IQGAP2,ANO6,SLC2A3,JUP,CD93,PLAUR,STOM,ADAM10,CD55,TCIRG1,RAP2C,CD44,AP2A2,GCA,SIRPA,B4GALT1,MVP,DEGS1,IQGAP1,ATP11A,BST2,PYGL,CKAP4,APAF1,PFKL,TMEM30A,SNAP25,CD59,PLD1,RNASET2,SERPINA1,AGPAT2,STK10,RAP1B,VAPA,HLA-C,PRKCD,HLA-A,CRISPLD2,RAB24,CTSZ,PGM2,RHOA,RAB10,RAB5B,GLA,LPCAT1,PGRMC1,RHOG,RAP1A,RAC1,PPIE,STBD1,XRCC5,NHLRC3,CD36,ATP11B,RAP2B,…	-1.43901	-0.34564	74	279
G ALPHA (I) SIGNALLING EVENTS%REACTOME DATABASE ID RELEASE 77%418594	G ALPHA (I) SIGNALLING EVENTS%REACTOME DATABASE ID RELEASE 77%418594	0.00151149	0.016909	-1	GNG5,ADRA2B,AHCYL1,GNAZ,GNB4,ITPR1,GNAQ,ADCY9,GNAI3,LPAR2,ITPR3,GNB1,GNAS,GNAI2,GNB2,RGS19,CAMK2B,PRKCD,GABBR1,PPP1R1B,GNA14	-1.70364	-0.486446	21	70
G ALPHA (S) SIGNALLING EVENTS%REACTOME%R-HSA-418555.9	G ALPHA (S) SIGNALLING EVENTS%REACTOME%R-HSA-418555.9	0.00151566	0.016909	-1	GNG5,GRK5,GNAZ,GNB4,ADCY9,GNAI3,GNB1,GNAS,GNAI2,GNB2	-1.83538	-0.658537	10	22
ENDODERMAL CELL DIFFERENTIATION%GOBP%GO:0035987	ENDODERMAL CELL DIFFERENTIATION%GOBP%GO:0035987	0.00151643	0.016909	-1	LAMB1,COL6A1,LAMB3,LAMA3,FN1,MMP2,MMP14,VTN,SETD2,COL4A2,CTR9,RTF1,CDC73,ITGA5,MIXL1	-1.8394	-0.654544	15	23
HISTONE DEMETHYLATION%GOBP%GO:0016577	HISTONE DEMETHYLATION%GOBP%GO:0016577	0.00153192	0.0170316	-1	KDM2B,PHF8,KDM3B,KDM4B,PHF2,KDM5B,KDM3A,KDM5A,KDM5C,KDM4C,KDM1A	-1.84855	-0.687682	11	19
HISTONE LYSINE DEMETHYLATION%GOBP%GO:0070076	HISTONE LYSINE DEMETHYLATION%GOBP%GO:0070076	0.0015361	0.0170316	-1	KDM2B,PHF8,KDM3B,KDM4B,PHF2,KDM5B,KDM3A,KDM5A,KDM5C,KDM4C,KDM1A	-1.84593	-0.695425	11	18
ESTABLISHMENT OF PROTEIN LOCALIZATION TO ORGANELLE%GOBP%GO:0072594	ESTABLISHMENT OF PROTEIN LOCALIZATION TO ORGANELLE%GOBP%GO:0072594	0.00161878	0.017862	1	RANBP6,TIMM17A,TNPO1,KPNA2,PTTG1IP,HSPA8,LRSAM1,RAB3GAP1,MFN2,RAB3GAP2,LAMP1,TSC2,ZFAND6,PRICKLE1,CHCHD4,KPNA1,TIMM8B,TIMM13,HSP90AA1,IPO5,PEX12,IPO9,RPL23,VPS37C,IPO13,ZFAND2B,TOMM34,AP3D1,NCOA4,IPO8,PEX6,APPL1,MOAP1,TIMM50,VPS4A,VPS36,IPO7,PEX3,IPO4,TOMM7,SRP54,TIMM23,KPNA4,VPS13D,HGS,PIK3R4,LONP2,MIPEP,RPAIN,VPS28,RUVBL2,HK1,TNPO3,PIH1D1	1.51302	0.34078	54	179
CELL DEVELOPMENT%GOBP%GO:0048468	CELL DEVELOPMENT%GOBP%GO:0048468	0.00162281	0.017862	-1	MYH6,LAMA2,MARVELD2,STC1,LAMB1,POF1B,THY1,BMP10,LAMC3,TAOK3,LAMC1,VSTM2L,EPB41L3,CLU,F11R,ICAM1,LAMC2,STXBP1,EFNB3,BSG,NEBL,FOLR1,ENG,LAMB3,LAMA3,LAMA5,SLC4A7,BMP7,IRX4,LAMA1,LAMB2,EPHB2,STX3,AGRN,TMOD1,RAB13,ZNF385A,LRP1,NRP2,FARP2,TCAP,PODXL,TJP1,MYOF,HEY2,TCOF1,RAP2C,MYH3,FN1,SEMA4B,ANK3,ATP7A,SPRY1,LYN,IQGAP1,THOC2,CXADR,PBX3,NRP1,LYAR,PAK1,S100A6,MEI4,SEMA4D,HAND2,NKX2-5,LMTK2,PLXND1,PDGFB,T…	-1.36054	-0.315065	108	455
RIBOSOME ASSEMBLY%GOBP%GO:0042255	RIBOSOME ASSEMBLY%GOBP%GO:0042255	0.00162911	0.017862	1	DDX28,MRPS2,MRPS11,SBDS,RPS14,MTERF3,RPS28,RPS19,MRPS7,RPS5,RPL11,RPL3,ERAL1,EIF6,C1QBP,RPSA,FASTKD2,RPF2,BOP1,RPL10,ABT1	1.83313	0.518359	21	46
SUMOYLATION OF DNA REPLICATION PROTEINS%REACTOME DATABASE ID RELEASE 77%4615885	SUMOYLATION OF DNA REPLICATION PROTEINS%REACTOME DATABASE ID RELEASE 77%4615885	0.00162919	0.017862	-1	NUP85,AAAS,TPR,NUP35,NUP62,CDCA8,NUP153,NUP54,BIRC5,NUP50,NUP155,RANBP2,RAE1,TOP2A,NUP88,TOP1,SUMO2,NUP160,NUP210,NUP107,SUMO1,NDC1,TOP2B	-1.79165	-0.575213	23	37
N-TERMINAL PROTEIN AMINO ACID MODIFICATION%GOBP%GO:0031365	N-TERMINAL PROTEIN AMINO ACID MODIFICATION%GOBP%GO:0031365	0.00170732	0.0186664	1	METAP2,NTMT1,NAA30,METAP1,NAA20,PPM1B,PDF,PPM1A,NAA35,CREBBP,NMT1	1.82259	0.627709	11	20
DEFECTIVE B4GALT7 CAUSES EDS, PROGEROID TYPE%REACTOME%R-HSA-3560783.1	DEFECTIVE B4GALT7 CAUSES EDS, PROGEROID TYPE%REACTOME%R-HSA-3560783.1	0.00172712	0.0188239	-1	HSPG2,GPC1,BGN,AGRN,CSPG4,DCN,VCAN,SDC3,GPC3,GPC4,GPC2,SDC4	-1.87021	-0.722713	12	16
TUBE DEVELOPMENT%GOBP%GO:0035295	TUBE DEVELOPMENT%GOBP%GO:0035295	0.00173172	0.0188239	-1	COL4A1,THY1,RECK,LOXL3,FOLR1,ENG,EGFL7,BMP7,LAMA1,RCN3,EPHB2,LOXL2,LRP1,NRP2,PODXL,HEY2,BMPER,NPNT,ATP7A,NCL,KDM2B,STRA6,NRP1,WNT11,PAK1,TGFBI,NKX2-5,PLXND1,ADAMTS9,S1PR1,RNF213,SEMA4C,CTNNB1,THBS1,CHRD,GPC3,RHOA,ING2,PCSK5,ROBO2,NOG,FGF2,ANGPTL2,RBPJ,JAM3,SERPINE1,SRC,AMOTL1,CAV1,TGFBR1,ITGB1BP1,PKNOX1,CER1,BCAS3,CHD8,ANXA2,SIRT1,ITGA5,TBX20,ABCA3,CDH2,MIXL1,TGFB1,RYR2,ID1,BMP5	-1.52076	-0.381437	66	177
CARDIAC CONDUCTION%REACTOME DATABASE ID RELEASE 77%5576891	CARDIAC CONDUCTION%REACTOME DATABASE ID RELEASE 77%5576891	0.00173611	0.0188239	-1	ASPH,AHCYL1,ATP1A2,CACNB2,ATP2B1,ATP1B1,ATP1A1,ATP1B2,FXYD1,FGF13,ITPR1,ITPR3,NKX2-5,CACNA1C,ATP1B3,CAMK2B,ATP2B4,KCNQ1,FXYD6,FKBP1B	-1.74003	-0.52646	20	50
GABA RECEPTOR ACTIVATION%REACTOME DATABASE ID RELEASE 77%977443	GABA RECEPTOR ACTIVATION%REACTOME DATABASE ID RELEASE 77%977443	0.00174155	0.0188308	-1	GNG5,GNB4,ADCY9,GNAI3,GNB1,GNAI2,GNB2,GABBR1,NPTN	-1.85879	-0.729787	9	15
IMPORT ACROSS PLASMA MEMBRANE%GOBP%GO:0098739	IMPORT ACROSS PLASMA MEMBRANE%GOBP%GO:0098739	0.00176113	0.0189902	-1	ATP1A2,ATP1B1,ATP1A1,SLC9A1,ATP1B2,SLC2A3,SLC39A10,SLC2A1,SLC9A3R1,SLC39A6,ATP1B3,SLC1A5,KCNJ8,ATP2B4,SLC1A4,CACNA2D1,CD36	-1.78865	-0.566839	17	39
COPI-INDEPENDENT GOLGI-TO-ER RETROGRADE TRAFFIC%REACTOME DATABASE ID RELEASE 77%6811436	COPI-INDEPENDENT GOLGI-TO-ER RETROGRADE TRAFFIC%REACTOME DATABASE ID RELEASE 77%6811436	0.0017726	0.0190615	1	BICD2,RAB3GAP1,RAB3GAP2,PAFAH1B2,DYNC1H1,ACTR10,PAFAH1B3,DCTN5,DYNC1I1,ACTR1A,CAPZA2,DCTN4,DCTN1,PAFAH1B1,BICD1,DYNC1I2,DYNC1LI1,RAB6A,DCTN3	1.86571	0.576122	19	31
INTERLEUKIN SIGNALING PATHWAY%PANTHER PATHWAY%P00036	INTERLEUKIN SIGNALING PATHWAY%PANTHER PATHWAY%P00036	0.001782	0.0191103	1	STAT4,STAT4,BRAF,BRAF,PIK3CA,PIK3CA,MAPKAPK2,MAPKAPK2,IL6ST,IL6ST,ARAF,ARAF,RAF1,RAF1,MAPK1,MAPK1,MAPK1,SHC1,SHC1,RPS6KA3,RPS6KA3,IKBKB,IKBKB,GSK3B,GSK3B,MTOR,MTOR,SOS1,SOS1,AKT3,AKT3,RASA1,RASA1,FOXO3,FOXO3	1.70341	0.437872	35	75
POSITIVE REGULATION OF TRANSPORT%GOBP%GO:0051050	POSITIVE REGULATION OF TRANSPORT%GOBP%GO:0051050	0.0018151	0.0194122	-1	TRH,STC1,AHCYL1,THY1,VAMP8,CACNB2,TESC,ATP2B1,ATP1B1,RAB27A,CLU,AKAP5,SLC4A8,SLC9A1,OCLN,ARHGEF5,ATP1B2,FXYD1,ANO6,JUP,EHD2,CDH1,EPHB2,STX1B,TRIAP1,LRP1,C2CD2L,MYO1C,WFS1,APOA1,CACNB3,DLG1,CNST,SIRPA,ANK3,NUMA1,NMB,P2RX4,ICE1,ACSL3,LIPG,LYAR,CD2AP,ABCA8,HRAS,MYOM1,NKX2-5,TMEM30A,TPR,VTN,PDGFB,WNK2,ATP1B3,OSBPL8,FLOT1,NOS1AP,AXL,STK11,PRKCD,MAGI2,TTN,FGG,KCNQ1,RHOQ,LDLRAP1,GPC3,TMED10,RXRA,ADAM9,R…	-1.41613	-0.334747	100	340
SYSTEM PROCESS%GOBP%GO:0003008	SYSTEM PROCESS%GOBP%GO:0003008	0.00182083	0.0194205	-1	MYH6,ASPH,COL2A1,MARVELD2,MPP2,COL11A2,ATP1A2,CACNB2,ATP2B1,COL1A2,ATP1B1,ATP1A1,YES1,F11R,SLC4A8,CPS1,GATM,OCLN,ATP1B2,FXYD1,SLC2A3,FGF13,EPHB2,TMOD1,SLC2A1,LRP1,SLC9A3R1,WFS1,MYH8,TCAP,TJP1,MYOF,MYH3,COL1A1,ANK3,GNAS,ST3GAL4,P2RX4,EPS8L2,SFRP5,PIK3C2A,STRA6,XRCC1,DTNA,RP2,MYOM1,SOBP,LIMA1,PDGFB,ABLIM1,TMOD3,CACNA1C,SLC1A5,OAT,MYBPC3,SLC16A7,TTN,FGG,KCNJ8,MYL6B,CTSZ,ATP2B4,KCNQ1,BIRC5,MYOM2,SLC1…	-1.40783	-0.33323	87	336
RNA SPLICING, VIA TRANSESTERIFICATION REACTIONS WITH BULGED ADENOSINE AS NUCLEOPHILE%GOBP%GO:0000377	RNA SPLICING, VIA TRANSESTERIFICATION REACTIONS WITH BULGED ADENOSINE AS NUCLEOPHILE%GOBP%GO:0000377	0.00183823	0.0195002	-1	CWF19L1,PSIP1,DDX41,RNPS1,SRSF9,SF1,PQBP1,RBM17,ZCCHC8,WBP11,LSM2,SRSF4,HNRNPU,CWC15,PRPF40B,SART3,SNRPA,LSM4,DCPS,PPIE,SCAF11,HNRNPR,COIL,CACTIN,PRPF8,SNRPB2,CWC27,SNW1,LSM7,MFAP1,ISY1,CDC5L,SNRPN,ZCRB1,PRPF19,DDX46,SNRPA1,SRRM1,RBM22,RBM19,PPWD1,HNRNPA3,WBP4,PRPF40A,SF3B6,SNRPC,SF3B2,PRPF4,PRPF31,SF3B3,SF3A2,SNRNP40,IK,TGS1,CRNKL1,GEMIN7,SFPQ,HNRNPC,PNN,LSM6,SF3B1,DHX16,CWF19L2,PRPF4B,USP39,SF3…	-1.48832	-0.369528	114	194
MRNA SPLICING, VIA SPLICEOSOME%GOBP%GO:0000398	MRNA SPLICING, VIA SPLICEOSOME%GOBP%GO:0000398	0.00183823	0.0195002	-1	CWF19L1,PSIP1,DDX41,RNPS1,SRSF9,SF1,PQBP1,RBM17,ZCCHC8,WBP11,LSM2,SRSF4,HNRNPU,CWC15,PRPF40B,SART3,SNRPA,LSM4,DCPS,PPIE,SCAF11,HNRNPR,COIL,CACTIN,PRPF8,SNRPB2,CWC27,SNW1,LSM7,MFAP1,ISY1,CDC5L,SNRPN,ZCRB1,PRPF19,DDX46,SNRPA1,SRRM1,RBM22,RBM19,PPWD1,HNRNPA3,WBP4,PRPF40A,SF3B6,SNRPC,SF3B2,PRPF4,PRPF31,SF3B3,SF3A2,SNRNP40,IK,TGS1,CRNKL1,GEMIN7,SFPQ,HNRNPC,PNN,LSM6,SF3B1,DHX16,CWF19L2,PRPF4B,USP39,SF3…	-1.48832	-0.369528	114	194
AMINO ACID AND DERIVATIVE METABOLISM%REACTOME DATABASE ID RELEASE 77%71291	AMINO ACID AND DERIVATIVE METABOLISM%REACTOME DATABASE ID RELEASE 77%71291	0.00186133	0.0195075	1	RPS4Y1,GLUD2,PSME4,RPL37,CBS,RPS29,GOT1,RPS10,RPS14,RPL36AL,PSMF1,PHGDH,RPS18,ADO,RPS16,RPLP1,RPS28,RPL36,RPL27,RPL36A,RPS19,RPS2,CKB,RPL23,RPS20,RPL19,RPS5,PSMD9,CKMT2,PSME3,RPL17,RPL10A,RPL11,RPS11,AIMP2,RPL4,FAU,PSMD5,ENOPH1,RPL38,RPS17,PSPH,PSMA5,RPL3,RPS8,ECHS1,RPL12,QDPR,RPL26,RPS21,ASS1,PSMB6,PCBD1,SLC25A12,RPL13,RPL15,RPL7,PRODH,SMS,HSD17B10,RPS15A,AHCY,PSMD4,RPSA,RPL8,RPS7,PSMA1,MTR,TXNR…	1.47927	0.322706	97	235
PROTEIN-CONTAINING COMPLEX DISASSEMBLY%GOBP%GO:0032984	PROTEIN-CONTAINING COMPLEX DISASSEMBLY%GOBP%GO:0032984	0.00186162	0.0195075	1	MAP1LC3B,DSTN,CFL2,HSPA8,MTRF1L,KATNB1,CFL1,CHMP7,CHMP3,WDR1,NAPB,STMN1,APEH,TECPR1,RPL23,GSPT1,KLC1,STMN2,MICAL2,ABCE1,GRWD1,GAK,ETF1,VPS4A,KIF14,VCP,ATG14,GSPT2,GSK3B	1.66074	0.415136	29	87
CELL JUNCTION ASSEMBLY%GOBP%GO:0034329	CELL JUNCTION ASSEMBLY%GOBP%GO:0034329	0.00186166	0.0195075	-1	MARVELD2,POF1B,THY1,LAMC1,EPB41L3,OCLN,ITGA6,JUP,FGF13,CDH1,RAB13,CD9,TJP1,CLDN6,PLEC,DLG1,FN1,CTNNA1,PKP3,PCDHB14,PIP5K1A,PIP5K1C,PLXND1,SDK2,FARP1,MPP7,CTNNB1,FLRT3,RHOA,JAM3,PKP4,SRC,CNTNAP1,LGI2,ARVCF,PCLO,LSR,PTPRK,MPDZ,ACTB,CTNND1,PKP2,CDC42	-1.63253	-0.436303	43	107
GLYCOPROTEIN BIOSYNTHETIC PROCESS%GOBP%GO:0009101	GLYCOPROTEIN BIOSYNTHETIC PROCESS%GOBP%GO:0009101	0.00186166	0.0195075	-1	CHST14,PLOD2,CHSY1,MGAT1,NUDT14,FAM20B,MGAT4C,DPY19L1,ALG2,B4GALT1,ATP7A,ST3GAL4,HS3ST3B1,PLOD1,TMTC3,GXYLT1,UGDH,PLOD3,B4GAT1,COG3,CHST12,GXYLT2,FUT8,POFUT1,PXYLP1,ST3GAL1,POMGNT2,UGGT2,ALG5,UGGT1,GFPT2,GOLPH3,MGAT5,MGAT4B,CHST11,POFUT2,EXT2,GLCE,DPM1,B3GAT3,CHPF,B3GNT2,ALG11,STT3B,ST3GAL2,CHST7,GALNT2	-1.62023	-0.433016	47	107
ARTERY MORPHOGENESIS%GOBP%GO:0048844	ARTERY MORPHOGENESIS%GOBP%GO:0048844	0.00186378	0.0195075	-1	FOLR1,ENG,LRP1,HEY2,STRA6,NRP1,ADAMTS9,NOG,RBPJ,TGFBR1	-1.81873	-0.668908	10	20
CELLULAR RESPONSE TO EXTRACELLULAR STIMULUS%GOBP%GO:0031668	CELLULAR RESPONSE TO EXTRACELLULAR STIMULUS%GOBP%GO:0031668	0.00187911	0.0196157	1	GLRX2,MAP1LC3B,HSPA8,MTMR3,CBS,TFEB,RRAGC,NUAK1,EIF4G1,ATG5,PDK2,DCTPP1,EIF2S1,ZFYVE1,ARHGAP35,WIPI1,USP33,MAPK1,WDR45,FOXO1,RPTOR,NUDT1,PICK1,EIF2AK3,CLEC16A,NUDT15,ATG14,BMPR2,ATG7,CPEB4,MTOR,PIK3R4,DAP,XPR1,FAS,GABARAPL2,PRKD1	1.63797	0.405523	37	92
MUSCLE CONTRACTION%REACTOME%R-HSA-397014.3	MUSCLE CONTRACTION%REACTOME%R-HSA-397014.3	0.00190003	0.0197055	-1	MYH6,ASPH,AHCYL1,ATP1A2,CACNB2,ATP2B1,ATP1B1,ATP1A1,MYL7,ATP1B2,FXYD1,FGF13,ITPR1,TMOD1,MYH8,TCAP,MYH3,ITPR3,PAK1,NKX2-5,TMOD3,CACNA1C,ATP1B3,CAMK2B,MYBPC3,TTN,MYL6B,ATP2B4,KCNQ1,FXYD6,FKBP1B	-1.61402	-0.437125	31	99
SCF(SKP2)-MEDIATED DEGRADATION OF P27 P21%REACTOME%R-HSA-187577.3	SCF(SKP2)-MEDIATED DEGRADATION OF P27 P21%REACTOME%R-HSA-187577.3	0.00190269	0.0197055	1	PSMF1,CDK4,PSMD9,PSME3,PSMD5,PSMA5,PSMB6,PSMD4,CCNE1,PSMA1,PSMA7,PSMB3,PSMB4,UBA52,PSMA6,CDK2,PSMD11,CCND1	1.75136	0.491679	18	48
CYTOSKELETON-DEPENDENT INTRACELLULAR TRANSPORT%GOBP%GO:0030705	CYTOSKELETON-DEPENDENT INTRACELLULAR TRANSPORT%GOBP%GO:0030705	0.00190779	0.0197055	1	MAP6,BICD2,HOOK2,HSPA8,PCM1,TUBA1A,TRAK1,RHOT2,LRPPRC,HSPB1,TUBB,DYNC1H1,ACTR10,TTC21B,AP3S2,AP3D1,DYNC1I1,WASL,CEP131,SPG11,IFT81,NDEL1,COPG1,CCDC88A,FYCO1,AP3B1,NEFL,KIF13A,DCTN1,KIF1C,MAPK8IP3,IFT57,PAFAH1B1,KIF1B,BLOC1S4,AP3S1,IFT140,BICD1,DYNC1I2,NDE1,WDR19,PEX14	1.61525	0.395759	42	98
VACUOLAR TRANSPORT%GOBP%GO:0007034	VACUOLAR TRANSPORT%GOBP%GO:0007034	0.00190779	0.0197055	1	RILP,HOOK2,HSPA8,VPS35,ATP13A2,TRAK1,LAMP1,ALS2,CHMP7,CHMP3,VPS37C,VPS51,AP3D1,SORT1,NCOA4,ARSB,GAK,CLEC16A,VPS4A,VPS36,SCYL2,VCP,ATG14,AKTIP,VPS13D,CHMP1B,HGS,PIK3R4,VPS28,GRN,KIF13A,UBXN6,VPS33A,PSAP,VPS39,VPS53,VPS18,CHMP4B	1.63501	0.400602	38	98
REGULATION OF HMOX1 EXPRESSION AND ACTIVITY%REACTOME%R-HSA-9707587.1	REGULATION OF HMOX1 EXPRESSION AND ACTIVITY%REACTOME%R-HSA-9707587.1	0.00191414	0.0197191	1	PSME4,PSMF1,PSMD9,PSME3,PSMD5,PSMA5,BACH1,PSMB6,KEAP1,PSMD4,CSNK2B,PSMA1,CUL3,PSMA7,PSMB3,PSMB4,UBA52,PSMA6,PSMD11,CSNK2A1,PSMD1,HMOX1	1.69872	0.465177	22	53
LEISHMANIA INFECTION%REACTOME DATABASE ID RELEASE 77%9658195	LEISHMANIA INFECTION%REACTOME DATABASE ID RELEASE 77%9658195	0.00192735	0.0198033	-1	GNG5,AHCYL1,GNAZ,YES1,GNB4,ITPR1,ADAM17,ADCY9,MYO1C,GNAI3,ITPR3,GNB1,GNAS,LYN,P2RX4,GNAI2,JUN,GNB2,FURIN	-1.66564	-0.461428	19	85
EYE MORPHOGENESIS%GOBP%GO:0048592	EYE MORPHOGENESIS%GOBP%GO:0048592	0.00197596	0.0202289	-1	THY1,FBN2,FBN1,COL5A1,MFAP2,PITX3,KDM2B,STRA6,SDK2	-1.79114	-0.593763	9	32
APC C:CDC20 MEDIATED DEGRADATION OF MITOTIC PROTEINS%REACTOME%R-HSA-176409.3	APC C:CDC20 MEDIATED DEGRADATION OF MITOTIC PROTEINS%REACTOME%R-HSA-176409.3	0.00197908	0.0202289	1	PSME4,UBE2S,PSMF1,UBE2D1,PSMD9,PSME3,UBE2E1,PSMD5,PSMA5,ANAPC5,PSMB6,PSMD4,PSMA1,ANAPC7,PSMA7,PSMB3,PSMB4,ANAPC1,UBA52,ANAPC4,CDK1,PSMA6,PSMD11,CCNB1	1.69394	0.453403	24	60
IMMUNE EFFECTOR PROCESS%GOBP%GO:0002252	IMMUNE EFFECTOR PROCESS%GOBP%GO:0002252	0.00198868	0.0202742	-1	CADM1,VAMP8,SERPINB9,CLU,STXBP2,YES1,ICAM1,COLEC11,ADAM17,STXBP3,LRP1,DOCK11,CD55,ATP7A,LYN,PAK1,GNL1,PRKCD,HLA-A	-1.71178	-0.494326	19	65
REGULATION OF CARDIAC MUSCLE CELL CONTRACTION%GOBP%GO:0086004	REGULATION OF CARDIAC MUSCLE CELL CONTRACTION%GOBP%GO:0086004	0.00200736	0.0204116	-1	DSG2,STC1,DSC2,DSP,CTNNA3,JUP,FGF13,DLG1,CACNA1C	-1.80448	-0.630104	9	25
PROTEIN DEMETHYLATION%GOBP%GO:0006482	PROTEIN DEMETHYLATION%GOBP%GO:0006482	0.00202874	0.0205227	-1	KDM2B,PHF8,KDM3B,KDM4B,PHF2,KDM5B,KDM3A,KDM5A,KDM5C,KDM4C,KDM1A	-1.81063	-0.657449	11	21
PROTEIN DEALKYLATION%GOBP%GO:0008214	PROTEIN DEALKYLATION%GOBP%GO:0008214	0.00202874	0.0205227	-1	KDM2B,PHF8,KDM3B,KDM4B,PHF2,KDM5B,KDM3A,KDM5A,KDM5C,KDM4C,KDM1A	-1.81063	-0.657449	11	21
COLLAGEN DEGRADATION%REACTOME DATABASE ID RELEASE 77%1442490	COLLAGEN DEGRADATION%REACTOME DATABASE ID RELEASE 77%1442490	0.00204813	0.0206656	-1	COL14A1,COL23A1,ADAM17,ADAM10,MMP2,MMP14,FURIN,COL26A1,ADAM9	-1.8132	-0.683093	9	18
REGULATION OF DNA-TEMPLATED TRANSCRIPTION, ELONGATION%GOBP%GO:0032784	REGULATION OF DNA-TEMPLATED TRANSCRIPTION, ELONGATION%GOBP%GO:0032784	0.00207337	0.0208398	-1	BRD4,HMGN1,THOC1,HNRNPU,ZMYND11,SCAF8,CDK12,ELL,NELFB,SUPT16H,ERCC6,CDC73,CCAR2,CCNK,NELFCD,HEXIM1,NELFA,LARP7,THOC5,CDK13,HTATSF1,TSFM,NELFE,CCNT1,LEO1,SUPT6H,TCERG1,CCNT2	-1.76793	-0.55703	28	40
SENSORY ORGAN MORPHOGENESIS%GOBP%GO:0090596	SENSORY ORGAN MORPHOGENESIS%GOBP%GO:0090596	0.00207601	0.0208398	-1	THY1,FBN2,FBN1,COL5A1,EPHB2,MFAP2,PITX3,KDM2B,STRA6,HDAC1,SDK2,MYO6	-1.77101	-0.553943	12	42
ION CHANNEL TRANSPORT%REACTOME DATABASE ID RELEASE 77%983712	ION CHANNEL TRANSPORT%REACTOME DATABASE ID RELEASE 77%983712	0.00211704	0.0211974	-1	ASPH,ATP1A2,ATP2B1,ATP1B1,ATP1A1,ATP1B2,FXYD1,ANO6,STOM,TCIRG1,ATP7A,ATP11A,PDZD11,WNK2,ATP1B3,CAMK2B,ATP2B4,FXYD6,FKBP1B	-1.70116	-0.486682	19	69
DEGRADATION OF GLI1 BY THE PROTEASOME%REACTOME%R-HSA-5610780.1	DEGRADATION OF GLI1 BY THE PROTEASOME%REACTOME%R-HSA-5610780.1	0.00218221	0.0217944	1	PSME4,PSMF1,ITCH,PSMD9,PSME3,PSMD5,PSMA5,PSMB6,PSMD4,PSMA1,PSMA7,PSMB3,PSMB4,UBA52,PRKACA,PSMA6,PSMD11	1.78694	0.496204	17	50
ARTERY DEVELOPMENT%GOBP%GO:0060840	ARTERY DEVELOPMENT%GOBP%GO:0060840	0.0021904	0.0218206	-1	FOLR1,ENG,LRP1,HEY2,STRA6,NRP1,ADAMTS9,ROBO2,NOG,RBPJ,TGFBR1	-1.75581	-0.624799	11	23
REGULATION OF HEART RATE BY CARDIAC CONDUCTION%GOBP%GO:0086091	REGULATION OF HEART RATE BY CARDIAC CONDUCTION%GOBP%GO:0086091	0.0021978	0.0218389	-1	DSG2,CACNB2,DSC2,DSP,CTNNA3,JUP,CACNA1C,KCNQ1,CACNA2D1,CAV1	-1.80483	-0.655346	10	21
IMMUNE SYSTEM PROCESS%GOBP%GO:0002376	IMMUNE SYSTEM PROCESS%GOBP%GO:0002376	0.00220469	0.021852	-1	XKR8,CADM1,LGALS8,THY1,ADD2,VAMP8,SERPINB9,CD99,RAB27A,CLU,BTN2A1,STXBP2,YES1,F11R,ICAM1,COLEC11,BSG,HELLS,IFI16,CD93,MFHAS1,ADAM17,STXBP3,SP100,EPHB2,ZNF385A,LRP1,CRIP1,ADAM10,DOCK11,FARP2,CD55,CD44,PXDN,PHB,PARP1,NCOA6,SIRPA,ATP7A,ADAR,LYN,TCF12,P2RX4,JAG2,MOV10,SFRP1,TRIM25,PDE12,CXADR,BST2,PIP5K1C,LIG3,LYAR,PAK1,NOD1,SEMA4D,HAND2,NKX2-5,PDGFB,CACNA1C,S1PR1,DDX58,STOML2,GNL1,SEMA3C,AXL,SETD2,S…	-1.36129	-0.315411	155	449
ION HOMEOSTASIS%REACTOME%R-HSA-5578775.2	ION HOMEOSTASIS%REACTOME%R-HSA-5578775.2	0.00228646	0.0225929	-1	ASPH,AHCYL1,ATP1A2,ATP2B1,ATP1B1,ATP1A1,ATP1B2,FXYD1,ITPR1,ITPR3,ATP1B3,CAMK2B,ATP2B4,FXYD6,FKBP1B	-1.76744	-0.576115	15	34
ORGANELLE ASSEMBLY%GOBP%GO:0070925	ORGANELLE ASSEMBLY%GOBP%GO:0070925	0.00229095	0.0225929	1	ASB2,MAP1LC3B,RILPL1,PGM5,RILP,GORAB,DDX28,CSDE1,MYH11,MRPS2,ATG101,ANLN,PCM1,STARD9,MRPS11,YTHDF3,MFN2,MYLK3,CSRP2,ARL3,PTEN,SBDS,YTHDF2,RB1CC1,CHMP7,CHMP3,ATG5,WDR1,MAPRE2,RPS14,OFD1,FLII,PTPN23,MTERF3,CEP135,ATXN2,RPS28,DYNC1H1,TMEM159,RPS19,TXNDC15,ANKRD1,EIF2S1,ZFYVE1,VPS37C,MRPS7,G3BP1,RPS5,WIPI1,ATG16L1,CSRP3,RPL11,DNAAF5,MYL2,WDR45,EHD1,RC3H1,CEP131,LMOD1,DBNL,IFT81,RPL3,VPS4A,VPS36,SYNPO…	1.38201	0.290159	94	339
PID_AJDISS_2PATHWAY%MSIGDB_C2%PID_AJDISS_2PATHWAY	PID_AJDISS_2PATHWAY%MSIGDB_C2%PID_AJDISS_2PATHWAY	0.00232752	0.022896	-1	DSP,JUP,ADAM10,CTNNA1,ZBTB33,HRAS,CTNNB1,IGF2,RAC1,ARF6,SRC,GNA13,CTNND1,CDC42,CDH2	-1.78119	-0.615796	15	26
CARDIAC CHAMBER MORPHOGENESIS%GOBP%GO:0003206	CARDIAC CHAMBER MORPHOGENESIS%GOBP%GO:0003206	0.00236705	0.0232267	-1	MYH6,BMP10,DSP,ENG,BMP7,NRP2,HEY2,NRP1,NKX2-5,SEMA3C,MYBPC3,ROBO2,NOG,RBPJ,MYL3,TGFBR1,TNNC1,PKP2,TBX20,MYH7,TGFB1,RYR2,TPM1,BMP5	-1.72635	-0.523788	24	49
MOLECULES ASSOCIATED WITH ELASTIC FIBRES%REACTOME%R-HSA-2129379.1	MOLECULES ASSOCIATED WITH ELASTIC FIBRES%REACTOME%R-HSA-2129379.1	0.0025261	0.0246029	-1	BMP10,BMP7,MFAP2,ITGB6,LTBP2,VTN,LTBP4,MFAP4,MFAP1,LTBP1,FBLN2,TGFB1	-1.76126	-0.631943	12	22
REGULATION OF BIOMINERAL TISSUE DEVELOPMENT%GOBP%GO:0070167	REGULATION OF BIOMINERAL TISSUE DEVELOPMENT%GOBP%GO:0070167	0.0025261	0.0246029	-1	ATP2B1,FBN2,ANO6,BMP7,HEY2,BMP2K,S1PR1,ECM1	-1.77964	-0.627738	8	24
REGULATION OF BIOMINERALIZATION%GOBP%GO:0110149	REGULATION OF BIOMINERALIZATION%GOBP%GO:0110149	0.0025261	0.0246029	-1	ATP2B1,FBN2,ANO6,BMP7,HEY2,BMP2K,S1PR1,ECM1	-1.77964	-0.627738	8	24
REGULATION OF BODY FLUID LEVELS%GOBP%GO:0050878	REGULATION OF BODY FLUID LEVELS%GOBP%GO:0050878	0.00253278	0.0246068	-1	VAMP8,STXBP1,ANO6,GNAQ,PLAUR,GNA12,STXBP3,EPHB2,CD9,WFS1,FN1,GNAS,ST3GAL4,GGCX,VTN,PDGFB,LMAN1,CD59,SERPINE2,CSRP1,AXL,PRKCD,THBS1,FGG,F13A1,SERPINE1,GAS6,CD36,SRC,RAP2B,CAV1,PLAT,FIBP,INPP5K	-1.65312	-0.460347	34	82
DEADENYLATION OF MRNA%REACTOME%R-HSA-429947.2	DEADENYLATION OF MRNA%REACTOME%R-HSA-429947.2	0.00262844	0.0254731	1	PAIP1,EIF4G1,PABPC1,EIF4E,CNOT10,CNOT7,CNOT4,EIF4A2,CNOT2,EIF4B,EIF4A1,CNOT1	1.80307	0.64862	12	17
CARDIAC CHAMBER DEVELOPMENT%GOBP%GO:0003205	CARDIAC CHAMBER DEVELOPMENT%GOBP%GO:0003205	0.0026488	0.0256072	-1	MYH6,BMP10,DSP,ENG,BMP7,NRP2,HEY2,STRA6,NRP1,NKX2-5,SEMA3C,MYBPC3,CRELD1,TMEM65,ROBO2,NOG,RBPJ,MYL3,TGFBR1,TNNC1,PKP2,TBX20,MYH7,TGFB1,RYR2,TPM1,BMP5	-1.70369	-0.504329	27	57
MICROTUBULE-BASED PROCESS%GOBP%GO:0007017	MICROTUBULE-BASED PROCESS%GOBP%GO:0007017	0.00270416	0.0260782	1	DCLK2,MAP2,PIN1,MAP7D1,BICD2,NTMT1,HOOK2,HSPA8,KATNAL2,TUBB6,PCM1,STARD9,NUDC,TUBA1A,TRAK1,KATNB1,SPC25,RHOT2,CFL1,CRIPT,SBDS,NAV1,TACC2,SPIRE1,KIF21A,MAPRE2,OFD1,STMN1,CAMSAP1,DNAH10,CEP135,LRPPRC,HSPB1,TUBB,DYNC1H1,ACTR10,PHLDB2,TUBB4B,ZPR1,WDR73,TTC21B,AP3S2,STMN2,SORD,VBP1,AP3D1,USP33,DNAAF5,DYNC1I1,DYNLT1,MTCL1,MAP7D3,CEP131,SPG11,IFT81,KIF14,VCP,GOLGA2,NDEL1,TRIM54,COPG1,TBCE,CCDC88A,NEK7,F…	1.38747	0.294199	109	308
ANGIOGENESIS%GOBP%GO:0001525	ANGIOGENESIS%GOBP%GO:0001525	0.00272068	0.0261732	-1	COL4A1,THY1,RECK,ENG,EPHB2,LOXL2,NRP2,BMPER,NCL,NRP1,TGFBI,PLXND1,S1PR1,RNF213,CTNNB1,THBS1,FGF2,ANGPTL2,RBPJ,JAM3,SERPINE1,AMOTL1,TGFBR1,ITGB1BP1,PKNOX1,ANXA2	-1.67507	-0.478287	26	70
TRANSPORT OF MATURE MRNAS DERIVED FROM INTRONLESS TRANSCRIPTS%REACTOME DATABASE ID RELEASE 77%159234	TRANSPORT OF MATURE MRNAS DERIVED FROM INTRONLESS TRANSCRIPTS%REACTOME DATABASE ID RELEASE 77%159234	0.00274194	0.0263132	-1	NUP85,AAAS,TPR,NUP35,NUP62,CPSF2,NUP153,NUP54,FIP1L1,CPSF4,NUP50,NUP155,RANBP2,SLBP,RAE1,NUP88,NUP160,NCBP1,NCBP2,NUP210,NUP107,NDC1,CPSF3	-1.74676	-0.557291	23	38
REGULATION OF ACTIN FILAMENT-BASED MOVEMENT%GOBP%GO:1903115	REGULATION OF ACTIN FILAMENT-BASED MOVEMENT%GOBP%GO:1903115	0.00281737	0.0269711	-1	DSG2,STC1,DSC2,DSP,CTNNA3,JUP,FGF13,DLG1,CACNA1C,MYBPC3	-1.7617	-0.604169	10	27
TRANSMEMBRANE TRANSPORT%GOBP%GO:0055085	TRANSMEMBRANE TRANSPORT%GOBP%GO:0055085	0.0028314	0.0270261	-1	SLC28A3,SLC6A4,ATP1A2,ATP2B1,ATP1B1,ATP1A1,SLC4A8,SLC9A1,ATP1B2,ANO6,SLC2A3,SLC4A7,ITPR1,SLC39A10,SLC2A1,SLC9A3R1,SFXN3,SLC39A6,CACNB3,ITPR3,ATP7A,P2RX4,PAM16,STRA6,CHERP,ABCA8,TMEM30A,CACNA1C,ATP1B3,STOML2,TST,SLC1A5,SLC16A7,KCNJ8,TAP2,ATP2B4,KCNQ1,SEC61B,RALBP1,PNPT1,SLC1A4,SLC25A23,ABCB6,SLC20A2,CACNA2D1,FGF2,GAS6,CD36,ATP11B,ATP6V1A,SLC39A11,RNF5,PDZK1	-1.45633	-0.357417	53	218
DEFECTIVE TPR MAY CONFER SUSCEPTIBILITY TOWARDS THYROID PAPILLARY CARCINOMA (TPC)%REACTOME%R-HSA-5619107.2	DEFECTIVE TPR MAY CONFER SUSCEPTIBILITY TOWARDS THYROID PAPILLARY CARCINOMA (TPC)%REACTOME%R-HSA-5619107.2	0.00284376	0.0270261	-1	NUP85,AAAS,TPR,NUP35,NUP62,NUP153,NUP54,NUP50,NUP155,RANBP2,RAE1,NUP88,NUP160,NUP210,NUP107,NDC1	-1.76753	-0.617201	16	25
REGULATION OF GLUCOKINASE BY GLUCOKINASE REGULATORY PROTEIN%REACTOME DATABASE ID RELEASE 77%170822	REGULATION OF GLUCOKINASE BY GLUCOKINASE REGULATORY PROTEIN%REACTOME DATABASE ID RELEASE 77%170822	0.00284376	0.0270261	-1	NUP85,AAAS,TPR,NUP35,NUP62,NUP153,NUP54,NUP50,NUP155,RANBP2,RAE1,NUP88,NUP160,NUP210,NUP107,NDC1	-1.76753	-0.617201	16	25
SARS-COV INFECTIONS%REACTOME%R-HSA-9679506.3	SARS-COV INFECTIONS%REACTOME%R-HSA-9679506.3	0.00285144	0.0270336	-1	COMT,ATP1A2,ATP1B1,ATP1A1,BRD4,ATP1B2,FXYD1,MGAT1,MGAT4C,AP2M1,AP2A2,PHF21A,ST3GAL4,HDAC1,ATP1B3,S1PR1,CHMP4C,FURIN,ARID4B,FXYD6,PARP4,FUT8,JAK1,AP2B1,ST3GAL1,PTGES3,RCOR1,KDM1A,TYK2,GATAD2A,ZCRB1,MGAT5,CANX,MGAT4B,MTA3,SUDS3,PRKCSH	-1.56274	-0.415217	37	112
POSITIVE REGULATION OF LIPID TRANSPORT%GOBP%GO:0032370	POSITIVE REGULATION OF LIPID TRANSPORT%GOBP%GO:0032370	0.00286292	0.027077	-1	TRIAP1,LRP1,APOA1,P2RX4,LIPG,ABCA8,TMEM30A,PRKCD,LDLRAP1,RXRA,CAV1,ANXA2,SIRT1,ABCA3	-1.74806	-0.627208	14	22
POSITIVE REGULATION OF CELL POPULATION PROLIFERATION%GOBP%GO:0008284	POSITIVE REGULATION OF CELL POPULATION PROLIFERATION%GOBP%GO:0008284	0.00288836	0.0272519	-1	NRAS,LAMB1,BMP10,GRK5,LAMC1,ATF2,KRAS,LAMC2,EGFL7,ADAM17,EPHB2,STX3,ADAM10,NRP2,CD55,HMGN5,TJP1,TCIRG1,PHB,FN1,MYDGF,TSPYL5,LYN,MMP2,SFRP1,SP1,BST2,EPCAM,NRP1,PAK1,S100A6,GNAI2,HRAS,HDAC1,NKX2-5,RPRD1B,JUN,PDGFB,ARNT,MECP2,ERBB3,ADAMTS1,HLA-A,CTNNB1,MAZ,IGFBP5,THBS1,CHRD,ECM1,IGF2,BIRC5,LDLRAP1,PDGFC,HNRNPU,ZNF335,KDM4C,RHOG,CDK6,CIB1,FGF2,RBPJ,GAS6,NCCRP1,RREB1,SDCBP,TGFBR1,STX4,AGT,ITGB1BP1,BMI…	-1.43271	-0.345845	72	262
KERATINIZATION%REACTOME%R-HSA-6805567.2	KERATINIZATION%REACTOME%R-HSA-6805567.2	0.00292247	0.0274418	-1	DSG2,DSC2,PPL,DSP,JUP,PKP3,FURIN,KRT18,PCSK6,TCHH,PKP4	-1.82065	-0.69458	11	17
EMBRYONIC SKELETAL SYSTEM DEVELOPMENT%GOBP%GO:0048706	EMBRYONIC SKELETAL SYSTEM DEVELOPMENT%GOBP%GO:0048706	0.00292247	0.0274418	-1	COL2A1,KIAA1217,COL1A1,WNT11,CTNNB1,HOXB4,PCSK5,NOG,TGFBR1	-1.81927	-0.694052	9	17
SYNTHESIS OF ACTIVE UBIQUITIN: ROLES OF E1 AND E2 ENZYMES%REACTOME%R-HSA-8866652.2	SYNTHESIS OF ACTIVE UBIQUITIN: ROLES OF E1 AND E2 ENZYMES%REACTOME%R-HSA-8866652.2	0.00295058	0.0276397	1	UBE2H,CDC34,UBE2S,UBE2G1,UBE2D1,USP5,UBE2E1,UBE2K,UCHL3,UBE2Z,UBA52,UBA1	1.83411	0.60653	12	23
LYSOSOMAL TRANSPORT%GOBP%GO:0007041	LYSOSOMAL TRANSPORT%GOBP%GO:0007041	0.00298063	0.0277436	1	RILP,HOOK2,HSPA8,VPS35,ATP13A2,TRAK1,LAMP1,ALS2,CHMP3,VPS51,AP3D1,SORT1,NCOA4,ARSB,GAK,CLEC16A,VPS4A,SCYL2,VCP,ATG14,AKTIP,HGS,GRN,KIF13A,UBXN6,VPS33A,PSAP,VPS39,VPS53,VPS18	1.65585	0.428172	30	73
NIK-->NONCANONICAL NF-KB SIGNALING%REACTOME%R-HSA-5676590.1	NIK-->NONCANONICAL NF-KB SIGNALING%REACTOME%R-HSA-5676590.1	0.00298751	0.0277436	1	PSME4,PSMF1,PSMD9,PSME3,PSMD5,PSMA5,PSMB6,UBA3,PSMD4,PSMA1,PSMA7,PSMB3,PSMB4,UBA52,PSMA6,PSMD11	1.74452	0.490973	16	47
ROS SENSING BY NFE2L2%REACTOME%R-HSA-8932339.1	ROS SENSING BY NFE2L2%REACTOME%R-HSA-8932339.1	0.00298994	0.0277436	1	PSME4,PSMF1,PSMD9,PSME3,PSMD5,PSMA5,PSMB6,KEAP1,PSMD4,CSNK2B,PSMA1,CUL3,PSMA7,PSMB3,PSMB4,UBA52,PSMA6,PSMD11,CSNK2A1,PSMD1	1.72048	0.483009	20	48
DECTIN-1 MEDIATED NONCANONICAL NF-KB SIGNALING%REACTOME DATABASE ID RELEASE 77%5607761	DECTIN-1 MEDIATED NONCANONICAL NF-KB SIGNALING%REACTOME DATABASE ID RELEASE 77%5607761	0.00298994	0.0277436	1	PSME4,PSMF1,PSMD9,PSME3,PSMD5,PSMA5,PSMB6,UBA3,PSMD4,PSMA1,PSMA7,PSMB3,PSMB4,UBA52,PSMA6,PSMD11	1.72177	0.483369	16	48
CELLULAR CHEMICAL HOMEOSTASIS%GOBP%GO:0055082	CELLULAR CHEMICAL HOMEOSTASIS%GOBP%GO:0055082	0.0030299	0.028048	-1	PCK2,STC1,THY1,CYBRD1,ATP1A2,ATP2B1,ATP1B1,ATP1A1,SLC4A8,HK2,SLC9A1,ATP1B2,SLC4A7,ITPR1,SLC39A10,WFS1,SLC39A6,CD55,TCIRG1,LPAR2,PDK3,CACNB3,ITPR3,ATP7A,P2RX4,CHERP,CACNA1C,ATP1B3,STOML2,PML,STC2,NPTN,ATP2B4,FKBP1B,VAPB,SLC25A23,ABCB6,CACNA2D1,CA2,ISCU,HRC,FOXK2,HSP90B1,FGF2,JPH1,GAS6,CD36,ATP6V1A,CHP1,CAV1,S100A8,PDZD8,PPT1,TFRC,CAPN3	-1.46215	-0.363766	55	191
REGULATION OF PROTEIN LOCALIZATION TO MEMBRANE%GOBP%GO:1905475	REGULATION OF PROTEIN LOCALIZATION TO MEMBRANE%GOBP%GO:1905475	0.0030978	0.02855	-1	VAMP8,GPC1,AKAP5,EPHB2,STX3,ARHGEF16,LRP1,MYO1C,AP2M1,DLG1,CNST,ANK3,ACSL3,MMP14,HRAS,GBP1,ATP2B4,RHOQ,LDLRAP1,GPC3,RHOG,RAP1A,CIB1,ARF6,ZDHHC5,CHP1,PDZK1,STX4,GPC4,ITGB1BP1,INPP5K,ATP2C1,GPC2,INS,ACTB	-1.63482	-0.45119	35	87
CELLULAR CATION HOMEOSTASIS%GOBP%GO:0030003	CELLULAR CATION HOMEOSTASIS%GOBP%GO:0030003	0.00310182	0.02855	-1	STC1,THY1,CYBRD1,ATP1A2,ATP2B1,ATP1B1,ATP1A1,SLC4A8,SLC9A1,ATP1B2,SLC4A7,ITPR1,SLC39A10,WFS1,SLC39A6,CD55,TCIRG1,LPAR2,CACNB3,ITPR3,ATP7A,P2RX4,CHERP,CACNA1C,ATP1B3,STOML2,PML,STC2,NPTN,ATP2B4,FKBP1B,VAPB,SLC25A23,ABCB6,CACNA2D1,CA2,ISCU,HRC,HSP90B1,FGF2,JPH1,CD36,ATP6V1A,CHP1,CAV1,S100A8,PDZD8,PPT1,TFRC,CAPN3	-1.49996	-0.380095	50	163
ADAPTIVE IMMUNE SYSTEM%REACTOME DATABASE ID RELEASE 77%1280218	ADAPTIVE IMMUNE SYSTEM%REACTOME DATABASE ID RELEASE 77%1280218	0.00310945	0.02855	1	ASB2,KLHL21,FBXL22,RILP,UBE2H,CDC34,PIK3R1,HECW2,GLMN,RNF41,RNF115,LRSAM1,RLIM,SIAH1,CTSL,PIK3CA,RNF14,PSME4,UBE2N,VASP,RCHY1,PTEN,SEC31A,HERC2,UBE2S,SIAH2,UBE2D3,PTPN11,HERC1,RNF123,MICA,TRAF6,SMURF2,PSMF1,CSK,KLHL22,KLHL13,PPP2R5E,LGMN,UBE2G1,PPP2R1A,DYNC1H1,UBE2D1,ACTR10,THOP1,HECTD1,PPP2R5A,ITCH,YWHAB,BTBD1,DCTN5,RAF1,KLC1,FBXL7,ZNRF2,EVL,PSMD9,PSME3,ARIH2,DYNC1I1,UNKL,UBE2E1,MKRN1,PSMD5,FBXO…	1.30845	0.271739	115	381
VESICLE DOCKING%GOBP%GO:0048278	VESICLE DOCKING%GOBP%GO:0048278	0.00311322	0.02855	-1	STXBP2,STXBP1,STXBP3,STX1B,STX3,RAB13,STX17,STX2,SNAP25,RAB8B,RAB10,STX4,RAB8A	-1.72814	-0.559835	13	35
POSITIVE REGULATION OF PROTEIN LOCALIZATION TO MEMBRANE%GOBP%GO:1905477	POSITIVE REGULATION OF PROTEIN LOCALIZATION TO MEMBRANE%GOBP%GO:1905477	0.00315258	0.0288026	-1	AKAP5,EPHB2,STX3,ARHGEF16,LRP1,MYO1C,DLG1,CNST,ANK3,ACSL3,HRAS,ATP2B4,RHOG,CIB1,ARF6,ZDHHC5,CHP1,PDZK1,STX4,ITGB1BP1,ATP2C1	-1.68011	-0.507097	21	51
NERVOUS SYSTEM PROCESS%GOBP%GO:0050877	NERVOUS SYSTEM PROCESS%GOBP%GO:0050877	0.00315544	0.0288026	-1	COL2A1,MARVELD2,MPP2,COL11A2,ATP1A2,GATM,FGF13,EPHB2,SLC9A3R1,WFS1,MYH8,TCAP,MYH3,COL1A1,ANK3,GNAS,ST3GAL4,P2RX4,EPS8L2,SFRP5,STRA6,XRCC1,RP2,SOBP,ABLIM1	-1.51094	-0.387865	25	146
IL1-MEDIATED SIGNALING EVENTS%PATHWAY INTERACTION DATABASE NCI-NATURE CURATED DATA%IL1-MEDIATED SIGNALING EVENTS	IL1-MEDIATED SIGNALING EVENTS%PATHWAY INTERACTION DATABASE NCI-NATURE CURATED DATA%IL1-MEDIATED SIGNALING EVENTS	0.00319882	0.0290831	1	PIK3R1,PIK3CA,UBE2N,TRAF6,SQSTM1,IRAK1,NFKB1,TOLLIP,IKBKB,TAB2,UBE2V1	1.78329	0.598235	11	22
REGULATION OF VASCULATURE DEVELOPMENT%GOBP%GO:1901342	REGULATION OF VASCULATURE DEVELOPMENT%GOBP%GO:1901342	0.0032084	0.0290831	-1	HTATIP2,HSPG2,ATF2,HK2,JUP,SP100,TJP1,DCN,MYDGF,BMPER,SFRP1,SP1,GTF2I,ANGPTL4,EMILIN1,PLXND1,ADAMTS9,EPN1,MECP2,ADAMTS1,CTNNB1,MTDH,PAK4,PML,THBS1,ECM1,KRIT1,ATP2B4,JAK1,COL4A2,FGF2,SERPINE1	-1.5816	-0.428709	32	98
REGULATION OF ANGIOGENESIS%GOBP%GO:0045765	REGULATION OF ANGIOGENESIS%GOBP%GO:0045765	0.0032084	0.0290831	-1	HTATIP2,HSPG2,ATF2,HK2,JUP,SP100,TJP1,DCN,MYDGF,BMPER,SFRP1,SP1,GTF2I,ANGPTL4,EMILIN1,PLXND1,ADAMTS9,EPN1,MECP2,ADAMTS1,CTNNB1,MTDH,PAK4,PML,THBS1,ECM1,KRIT1,ATP2B4,JAK1,COL4A2,FGF2,SERPINE1	-1.5816	-0.428709	32	98
NEGATIVE REGULATION OF TRANSCRIPTION, DNA-TEMPLATED%GOBP%GO:0045892	NEGATIVE REGULATION OF TRANSCRIPTION, DNA-TEMPLATED%GOBP%GO:0045892	0.00321728	0.0290964	-1	LOXL3,ZNF589,PRDM16,CENPV,HELLS,IFI16,BMP7,AEBP1,SP100,HMGA1,IKZF4,LOXL2,WFS1,HEY2,DLG1,CBFA2T2,PHF21A,PHB,PARP1,ZNF436,RCOR2,DPY30,SFRP1,KDM2B,WNT11,LYAR,GTF2IRD1,SMCHD1,CRY2,ZBTB33,SCAF4,SEMA4D,HDAC1,NKX2-5,ENO1,TPR,CBX8,DPF2,JUN,PDGFB,MTF2,BRD7,ATF7IP,CBX5,MAD2L2,MECP2,CREM,THRA,RBAK,CTNNB1,AASS,MTDH,MAZ,PML,ZNF281,KDM5C,ZNF555,CBX3,YEATS2,IGF2,BIRC5,EZH1,PDCD4,HNRNPU,RXRA,ZMYND11,SIN3A,SCAF8,…	-1.33933	-0.308824	189	480
REGULATION OF HEART CONTRACTION%GOBP%GO:0008016	REGULATION OF HEART CONTRACTION%GOBP%GO:0008016	0.00324532	0.0292722	-1	MYH6,DSG2,STC1,BMP10,ATP1A2,CACNB2,DSC2,ATP2B1,ATP1B1,ATP1A1,SLC9A1,DSP,ATP1B2,FXYD1,CTNNA3,JUP,FGF13,DLG1,P2RX4,CXADR,NKX2-5,CACNA1C,NOS1AP,ATP2B4,KCNQ1,FKBP1B,DES,CACNA2D1,HRC,TMEM65	-1.62436	-0.448301	30	87
HH MUTANTS ARE DEGRADED BY ERAD%REACTOME%R-HSA-5362768.2	HH MUTANTS ARE DEGRADED BY ERAD%REACTOME%R-HSA-5362768.2	0.0032591	0.0292722	1	PSME4,PSMF1,PSMD9,PSME3,PSMD5,PSMA5,VCP,PSMB6,PSMD4,PSMA1,PSMA7,PSMB3,PSMB4,UBA52,PSMA6,PSMD11	1.72681	0.485989	16	47
HH MUTANTS ABROGATE LIGAND SECRETION%REACTOME%R-HSA-5387390.4	HH MUTANTS ABROGATE LIGAND SECRETION%REACTOME%R-HSA-5387390.4	0.0032591	0.0292722	1	PSME4,PSMF1,PSMD9,PSME3,PSMD5,PSMA5,VCP,PSMB6,PSMD4,PSMA1,PSMA7,PSMB3,PSMB4,UBA52,PSMA6,PSMD11	1.72681	0.485989	16	47
CELL-SUBSTRATE ADHESION%GOBP%GO:0031589	CELL-SUBSTRATE ADHESION%GOBP%GO:0031589	0.00328898	0.0294732	-1	LAMB1,THY1,LAMC3,NID2,LAMC1,LAMB3,ATP1B2,ITGA6,LAMA5,LAMB2,ITGB6,CD44,FN1,NPNT,PIP5K1A,NRP1,EMILIN1,VTN,ADAMTS9,RADIL,FGG,RHOA,ADAM9,RAC1,SRC,ADAMTS12	-1.62611	-0.456371	26	78
OUTFLOW TRACT MORPHOGENESIS%GOBP%GO:0003151	OUTFLOW TRACT MORPHOGENESIS%GOBP%GO:0003151	0.00331455	0.0295595	-1	FOLR1,ENG,NRP2,HEY2,NRP1,HAND2,NKX2-5,SEMA3C,ROBO2,NOG,RBPJ	-1.74563	-0.598659	11	27
NEGATIVE REGULATION OF ENDOTHELIAL CELL MIGRATION%GOBP%GO:0010596	NEGATIVE REGULATION OF ENDOTHELIAL CELL MIGRATION%GOBP%GO:0010596	0.00332116	0.0295595	-1	STC1,BMP10,JUP,SP100,DCN,ADAMTS9,MECP2,THBS1,KRIT1,ATP2B4,RHOA,FGF2	-1.73998	-0.592673	12	28
IMPORT INTO CELL%GOBP%GO:0098657	IMPORT INTO CELL%GOBP%GO:0098657	0.00332121	0.0295595	-1	SLC6A4,CYBRD1,ATP1A2,ATP1B1,ATP1A1,SLC9A1,ATP1B2,SLC2A3,SLC39A10,SLC2A1,SLC39A6,ACSL3,SNAP25,ATP1B3,SLC1A5,KCNJ8,ATP2B4,SLC1A4,CACNA2D1	-1.69522	-0.51599	19	48
REGULATION OF BLOOD CIRCULATION%GOBP%GO:1903522	REGULATION OF BLOOD CIRCULATION%GOBP%GO:1903522	0.00336848	0.0299124	-1	MYH6,DSG2,STC1,BMP10,ATP1A2,CACNB2,DSC2,ATP2B1,ATP1B1,ATP1A1,SLC9A1,DSP,ATP1B2,FXYD1,CTNNA3,JUP,FGF13,DLG1,P2RX4,CXADR,NKX2-5,CACNA1C,NOS1AP,FGG,ATP2B4,KCNQ1,FKBP1B,DES,CACNA2D1,HRC,TMEM65	-1.60123	-0.436961	31	93
RESPONSE TO ORGANIC CYCLIC COMPOUND%GOBP%GO:0014070	RESPONSE TO ORGANIC CYCLIC COMPOUND%GOBP%GO:0014070	0.00339766	0.0301034	-1	GGT3P,PCK2,ATP1A2,ATP1A1,GLDC,SLC9A1,FOLR1,JUP,CDH1,BMP7,GNAI3,PHB,CTNNA1,GNB1,GNAS,P2RX4,SFRP1,PDE12,RALB,PDGFB,DDX58,FLOT1,RAP1B,CTNNB1,IGFBP5,KDM3A,THBS1,ATP2B4,KCNQ1,PQBP1,UBE3A,GNA14,IFNA8,HNRNPU,ADAM9,HSP90B1,RAP1A,ALPL,ARID1A,GNA11,SRC,CAV1,TGFBR1,GNAI1,INPP5K,COLEC12,TGM2,PPP1R9B,GOLPH3,ACTB,AQP1,TMF1,RBFOX2,SLC26A6,KCNJ11,TGFB1,RYR2	-1.49876	-0.382676	57	153
DEFECTIVE B3GAT3 CAUSES JDSSDHD%REACTOME DATABASE ID RELEASE 77%3560801	DEFECTIVE B3GAT3 CAUSES JDSSDHD%REACTOME DATABASE ID RELEASE 77%3560801	0.00345423	0.0304671	-1	HSPG2,GPC1,BGN,AGRN,CSPG4,DCN,VCAN,SDC3,GPC3,GPC4,GPC2,SDC4	-1.8224	-0.704236	12	16
TRABECULA MORPHOGENESIS%GOBP%GO:0061383	TRABECULA MORPHOGENESIS%GOBP%GO:0061383	0.00345423	0.0304671	-1	BMP10,FBN2,ENG,BMP7,SEMA4D,S1PR1,RHOA,NOG,RBPJ,TGFBR1	-1.81004	-0.699463	10	16
PI3 KINASE PATHWAY%PANTHER PATHWAY%P00048	PI3 KINASE PATHWAY%PANTHER PATHWAY%P00048	0.00346647	0.0305065	-1	NRAS,NRAS,NRAS,KRAS,GNB4,GNB4,GNAQ,GNAQ,GNAQ,GNAI3,GNAI3,GNAI3,GNB1,GNB1,GNB1,GNAI2,GNAI2,GNB2,GNB2,GNB2	-1.63123	-0.460948	20	75
CELLULAR ION HOMEOSTASIS%GOBP%GO:0006873	CELLULAR ION HOMEOSTASIS%GOBP%GO:0006873	0.00349697	0.0306955	-1	STC1,THY1,CYBRD1,ATP1A2,ATP2B1,ATP1B1,ATP1A1,SLC4A8,SLC9A1,ATP1B2,SLC4A7,ITPR1,SLC39A10,WFS1,SLC39A6,CD55,TCIRG1,LPAR2,CACNB3,ITPR3,ATP7A,P2RX4,CHERP,CACNA1C,ATP1B3,STOML2,PML,STC2,NPTN,ATP2B4,FKBP1B,VAPB,SLC25A23,ABCB6,CACNA2D1,CA2,ISCU,HRC,HSP90B1,FGF2,JPH1,CD36,ATP6V1A,CHP1,CAV1,S100A8,PDZD8,PPT1,TFRC,CAPN3	-1.48627	-0.375898	50	165
AXON GUIDANCE%REACTOME%R-HSA-422475.6	AXON GUIDANCE%REACTOME%R-HSA-422475.6	0.00350672	0.0306955	1	RPS4Y1,CRMP1,ITGA9,ANK1,NTN1,CNTN1,PIK3R1,EPHA7,HSPA8,RELN,MYH11,SIAH1,PIK3CA,DPYSL4,TLN1,PSME4,RPL37,VASP,SEMA5A,MYL9,RPS29,EPHA2,CFL1,RPS10,DPYSL3,EIF4G1,SIAH2,PTPN11,SRGAP1,ZSWIM8,RPS14,RPL36AL,PSMF1,PFN1,PLXNA2,RPS18,RPS16,RPLP1,RPS28,RPL36,RPL27,HSP90AA1,RPL36A,RPS19,RPS2,PITPNA,ARPC1A,RPL23,NCK2,GSPT1,RPS20,RPL19,ARHGAP35,PABPC1,RPS5,EVL,PSMD9,PSME3,RPL17,RPL10A,RPL11,USP33,RPS11,PRKCA,MAPK…	1.32048	0.275842	130	352
REGULATION OF UBIQUITIN-PROTEIN TRANSFERASE ACTIVITY%GOBP%GO:0051438	REGULATION OF UBIQUITIN-PROTEIN TRANSFERASE ACTIVITY%GOBP%GO:0051438	0.00351141	0.0306955	1	PIN1,UBE2N,PARK7,DCUN1D2,PTEN,UBE2S,FEM1B,RPS2,RPL23,RPL11	1.78926	0.57567	10	26
GLYOXYLATE METABOLISM AND GLYCINE DEGRADATION%REACTOME%R-HSA-389661.6	GLYOXYLATE METABOLISM AND GLYCINE DEGRADATION%REACTOME%R-HSA-389661.6	0.00353654	0.0308046	-1	GLDC,LIAS,AMT,DHTKD1,LIPT1,LIPT2,PDHX,BCKDHB	-1.74375	-0.62566	8	22
RNA SPLICING, VIA TRANSESTERIFICATION REACTIONS%GOBP%GO:0000375	RNA SPLICING, VIA TRANSESTERIFICATION REACTIONS%GOBP%GO:0000375	0.00353959	0.0308046	-1	CWF19L1,PSIP1,DDX41,RNPS1,SRSF9,SF1,PQBP1,RBM17,ZCCHC8,WBP11,LSM2,SRSF4,HNRNPU,CWC15,PRPF40B,SART3,SNRPA,LSM4,DCPS,PPIE,SCAF11,HNRNPR,COIL,CACTIN,PRPF8,SNRPB2,CWC27,SNW1,LSM7,MFAP1,ISY1,KHSRP,CDC5L,SNRPN,ZCRB1,PRPF19,DDX46,SNRPA1,SRRM1,RBM22,RBM19,PPWD1,HNRNPA3,WBP4,PRPF40A,SF3B6,SNRPC,SF3B2,PRPF4,PRPF31,SF3B3,SF3A2,SNRNP40,IK,TGS1,CRNKL1,GEMIN7,SFPQ,HNRNPC,PNN,LSM6,SF3B1,DHX16,CWF19L2,PRPF4B,USP…	-1.45891	-0.361365	115	198
FOXA1 TRANSCRIPTION FACTOR NETWORK%PATHWAY INTERACTION DATABASE NCI-NATURE CURATED DATA%FOXA1 TRANSCRIPTION FACTOR NETWORK	FOXA1 TRANSCRIPTION FACTOR NETWORK%PATHWAY INTERACTION DATABASE NCI-NATURE CURATED DATA%FOXA1 TRANSCRIPTION FACTOR NETWORK	0.00358423	0.0311241	-1	SP1,VTN,JUN,SERPINA1,POU2F1,NDUFV3,CDKN1B,INS,EP300,NFIC	-1.77859	-0.670055	10	18
REGULATION OF PROTEIN UBIQUITINATION%GOBP%GO:0031396	REGULATION OF PROTEIN UBIQUITINATION%GOBP%GO:0031396	0.00359595	0.0311569	1	PTTG1IP,PIN1,NXN,COMMD1,UBE2N,PARK7,RCHY1,DCUN1D2,PTEN,UBE2S,PRICKLE1,PDCD6,TRAF6,ARRB1,SQSTM1,UBE2D1,HSP90AA1,AMER1,PEF1,RPS2,RPL23,OTUB1,RPL11,OGT,DNAJA1,UBXN1,ISG15,HSPBP1,USP4,FKBP1A,VPS28,HSP90AB1,RPS7,CUL3,XIAP,PPIA,GNL3L,PLAA,BAG2,HUWE1,DCUN1D4,RPS3	1.5699	0.381169	42	104
TRANSPORT OF THE SLBP DEPENDANT MATURE MRNA%REACTOME DATABASE ID RELEASE 77%159230	TRANSPORT OF THE SLBP DEPENDANT MATURE MRNA%REACTOME DATABASE ID RELEASE 77%159230	0.00363456	0.0314221	-1	NUP85,AAAS,TPR,NUP35,NUP62,NUP153,NUP54,NUP50,NUP155,RANBP2,SLBP,RAE1,NUP88,NUP160,NCBP1,NCBP2,NUP210,NUP107,NDC1	-1.71223	-0.572018	19	31
REGULATION OF TRANSMEMBRANE RECEPTOR PROTEIN SERINE/THREONINE KINASE SIGNALING PATHWAY%GOBP%GO:0090092	REGULATION OF TRANSMEMBRANE RECEPTOR PROTEIN SERINE/THREONINE KINASE SIGNALING PATHWAY%GOBP%GO:0090092	0.0036539	0.031474	-1	BMP10,FBN2,FOLR1,ENG,PRDM16,FBN1,PEG10,BMP7,ADAM17,CD109,LRP1,GDF15,GREM2,CILP,BMPER,NUMA1,SPRY1,SNX25,VASN,EMILIN1,LTBP4,STK11,MAGI2,THBS1,CHRD,ING2,PCSK6,NOG,RBPJ,SDCBP,CAV1,TGFBR1,SNW1,LEFTY2,CER1,TWSG1,LTBP1,INHBE,EP300,SIRT1,TBX20,GDF6,ZBTB7A,TGFB1,BMP5	-1.56233	-0.423128	45	99
LPA RECEPTOR MEDIATED EVENTS%PATHWAY INTERACTION DATABASE NCI-NATURE CURATED DATA%LPA RECEPTOR MEDIATED EVENTS	LPA RECEPTOR MEDIATED EVENTS%PATHWAY INTERACTION DATABASE NCI-NATURE CURATED DATA%LPA RECEPTOR MEDIATED EVENTS	0.0036566	0.031474	-1	GNAZ,GNAQ,GNA12,ADCY9,GNAI3,LPAR2,GNB1,LYN,MMP2,GNAI2,HRAS,JUN,PRKCD,GNA14,RHOA,RAC1,GNA11,SRC,GNA13,GNAI1	-1.7262	-0.534983	20	44
REGULATION OF APC C ACTIVATORS BETWEEN G1 S AND EARLY ANAPHASE%REACTOME DATABASE ID RELEASE 77%176408	REGULATION OF APC C ACTIVATORS BETWEEN G1 S AND EARLY ANAPHASE%REACTOME DATABASE ID RELEASE 77%176408	0.0037292	0.0319588	1	PSME4,UBE2S,PSMF1,UBE2D1,PSMD9,PSME3,UBE2E1,PSMD5,PSMA5,ANAPC5,PSMB6,PSMD4,PSMA1,ANAPC7,PSMA7,PSMB3,PSMB4,ANAPC1,UBA52,ANAPC4,CDK1,PSMA6,CDK2,PSMD11,CCNB1	1.63964	0.434145	25	64
RETROGRADE TRANSPORT, ENDOSOME TO GOLGI%GOBP%GO:0042147	RETROGRADE TRANSPORT, ENDOSOME TO GOLGI%GOBP%GO:0042147	0.0037292	0.0319588	1	DENND5A,SNX2,VPS35,TBC1D17,VPS26B,RAB9B,SNX3,SNX12,SNX5,CLN5,VPS51,YKT6,HEATR5A,TBC1D10A,TBC1D10B,SPAG9,SNX8,UBE2O,DCTN1,SNX6,VPS53,TBC1D5,GOSR1,GBF1	1.63599	0.433176	24	64
HALLMARK_INFLAMMATORY_RESPONSE%MSIGDB_C2%HALLMARK_INFLAMMATORY_RESPONSE	HALLMARK_INFLAMMATORY_RESPONSE%MSIGDB_C2%HALLMARK_INFLAMMATORY_RESPONSE	0.00376864	0.0320035	-1	ATP2B1,PLAUR,GNAI3,CD55,LYN,P2RX4,BST2,MMP14,SEMA4D,AXL,GABBR1,GPC3,SERPINE1,TAPBP,PSEN1,EIF2AK2,TIMP1,PCDH7	-1.71272	-0.554839	18	35
PROTEIN LOCALIZATION TO EXTRACELLULAR REGION%GOBP%GO:0071692	PROTEIN LOCALIZATION TO EXTRACELLULAR REGION%GOBP%GO:0071692	0.00376864	0.0320035	-1	FBN2,TANGO2,FBN1,RCN3,RAB13,LTBP2,PREB,RAB8B,FGG,RAB10,PCSK5,MIA2,RAB8A,CER1,PDIA4,LTBP1,GOLPH3,CANX,RAB3A,RAB11FIP5,RAB3D	-1.70728	-0.553077	21	35
AUTODEGRADATION OF THE E3 UBIQUITIN LIGASE COP1%REACTOME DATABASE ID RELEASE 77%349425	AUTODEGRADATION OF THE E3 UBIQUITIN LIGASE COP1%REACTOME DATABASE ID RELEASE 77%349425	0.00376952	0.0320035	1	PSME4,PSMF1,PSMD9,PSME3,PSMD5,PSMA5,PSMB6,PSMD4,PSMA1,PSMA7,PSMB3,PSMB4,UBA52,PSMA6,PSMD11	1.70544	0.490326	15	43
CDT1 ASSOCIATION WITH THE CDC6:ORC:ORIGIN COMPLEX%REACTOME%R-HSA-68827.2	CDT1 ASSOCIATION WITH THE CDC6:ORC:ORIGIN COMPLEX%REACTOME%R-HSA-68827.2	0.00378788	0.0320035	1	PSME4,PSMF1,PSMD9,PSME3,PSMD5,PSMA5,PSMB6,PSMD4,PSMA1,PSMA7,PSMB3,PSMB4,UBA52,PSMA6,PSMD11,ORC5	1.72842	0.491089	16	45
NEGATIVE REGULATION OF NOTCH4 SIGNALING%REACTOME DATABASE ID RELEASE 77%9604323	NEGATIVE REGULATION OF NOTCH4 SIGNALING%REACTOME DATABASE ID RELEASE 77%9604323	0.00378788	0.0320035	1	PSMF1,PSMD9,PSME3,PSMD5,PSMA5,PSMB6,PSMD4,PSMA1,PSMA7,PSMB3,PSMB4,UBA52,PSMA6,PSMD11,PSMD1	1.72617	0.490449	15	45
NUCLEAR IMPORT OF REV PROTEIN%REACTOME%R-HSA-180746.1	NUCLEAR IMPORT OF REV PROTEIN%REACTOME%R-HSA-180746.1	0.0037935	0.0320035	-1	NUP85,AAAS,TPR,NUP35,NUP62,NUP153,NUP54,NUP50,NUP155,RANBP2,RAE1,NUP88,NUP160,RCC1,NUP210,NUP107,NDC1	-1.73375	-0.585627	17	29
POSTREPLICATION REPAIR%GOBP%GO:0006301	POSTREPLICATION REPAIR%GOBP%GO:0006301	0.00379867	0.0320035	1	UBE2N,RCHY1,PCNA,VCP,POLDIP2,UBE2V1,POLE2,USP10,ZBTB1	1.77053	0.649515	9	16
DEFECTIVE B3GALT6 CAUSES EDSP2 AND SEMDJL1%REACTOME%R-HSA-4420332.1	DEFECTIVE B3GALT6 CAUSES EDSP2 AND SEMDJL1%REACTOME%R-HSA-4420332.1	0.00379965	0.0320035	-1	HSPG2,GPC1,BGN,AGRN,CSPG4,DCN,VCAN,SDC3,GPC3,GPC4,GPC2,SDC4	-1.79553	-0.693854	12	16
ALPHA6BETA4INTEGRIN%IOB%ALPHA6BETA4INTEGRIN	ALPHA6BETA4INTEGRIN%IOB%ALPHA6BETA4INTEGRIN	0.00383264	0.0322122	-1	LAMB1,LAMC1,YES1,LAMC2,DSP,LAMB3,LAMA3,ITGA6,LAMA5,LAMA1,LAMB2,EPHB2,PLEC,PAK1	-1.71332	-0.535897	14	42
NEGATIVE REGULATION OF CELLULAR CATABOLIC PROCESS%GOBP%GO:0031330	NEGATIVE REGULATION OF CELLULAR CATABOLIC PROCESS%GOBP%GO:0031330	0.00386915	0.0324496	1	OPHN1,PAIP1,MTMR8,PIK3CA,ATP13A2,PARK7,MAPKAPK2,PHAX,WDR6,TSC2,SIRT2,EIF4G1,PSMF1,KLHL22,EIF4G2,GIPC1,EIF4G3,RPL23,PABPC1,LARP1,BAG6,RPL11,YBX1,FEZ2,EIF4E,SNCA,CLEC16A,OGT,USP25,ATG7,UBXN1,MTMR9,TAB2,GOLGA2,MTOR,CST3,CTSA,DAP,KDM4A,HSP90AB1,RBM24,RPS7,GABARAPL2,EIF3H	1.50527	0.351901	44	134
TRANSLATIONAL ELONGATION%GOBP%GO:0006414	TRANSLATIONAL ELONGATION%GOBP%GO:0006414	0.00393701	0.0327973	1	EEF2,EEF1A2,ASCC2,TRIP4,ZNF598,GTPBP1,EEF1D,ASCC3,EEF1A1P5,EEF1G,TUFM,MRPL44	1.77318	0.594842	12	22
REGULATION OF CYTOSOLIC CALCIUM ION CONCENTRATION%GOBP%GO:0051480	REGULATION OF CYTOSOLIC CALCIUM ION CONCENTRATION%GOBP%GO:0051480	0.00394011	0.0327973	-1	THY1,ATP1A2,ATP2B1,ITPR1,CD55,LPAR2,CACNB3,ITPR3,P2RX4,CHERP,CACNA1C,NPTN,ATP2B4,FKBP1B,CACNA2D1,HRC,FGF2,JPH1,CD36,CAV1	-1.65811	-0.497738	20	53
FORMATION OF PRIMARY GERM LAYER%GOBP%GO:0001704	FORMATION OF PRIMARY GERM LAYER%GOBP%GO:0001704	0.00395192	0.0327973	-1	LAMB1,COL6A1,LAMB3,LAMA3,FN1,MMP2,MMP14,VTN,SETD2,COL4A2,CTR9,RTF1,CDC73,ITGA5,TBX20,MIXL1,ITGA2	-1.73244	-0.574306	17	32
PID_S1P_S1P3_PATHWAY%MSIGDB_C2%PID_S1P_S1P3_PATHWAY	PID_S1P_S1P3_PATHWAY%MSIGDB_C2%PID_S1P_S1P3_PATHWAY	0.00395393	0.0327973	-1	GNAZ,GNAQ,GNAI3,S1PR1,GNA14,RAC1,GNA11,SRC,GNA13,GNAI1	-1.78192	-0.679802	10	17
GLUCAGON SIGNALING IN METABOLIC REGULATION%REACTOME DATABASE ID RELEASE 77%163359	GLUCAGON SIGNALING IN METABOLIC REGULATION%REACTOME DATABASE ID RELEASE 77%163359	0.00397237	0.0327973	-1	GNG5,GNB4,ADCY9,GNB1,GNAS,GNB2	-1.79145	-0.692276	6	16
CATION HOMEOSTASIS%GOBP%GO:0055080	CATION HOMEOSTASIS%GOBP%GO:0055080	0.00397667	0.0327973	-1	STC1,THY1,CYBRD1,ATP1A2,ATP2B1,ATP1B1,ATP1A1,SLC4A8,SLC9A1,ATP1B2,SLC4A7,ITPR1,SLC39A10,WFS1,SLC39A6,CD55,TCIRG1,LPAR2,CACNB3,ITPR3,ANK3,ATP7A,P2RX4,CHERP,CACNA1C,ATP1B3,STOML2,PML,STC2,NPTN,ATP2B4,HEPH,FKBP1B,VAPB,SLC25A23,ABCB6,CACNA2D1,CA2,ISCU,HRC,HSP90B1,FGF2,JPH1,CD36,ATP6V1A,CNNM4,CHP1,CAV1,S100A8,PDZD8,PPT1,HMOX2,TFRC,CAPN3	-1.45812	-0.364765	54	181
NEP NS2 INTERACTS WITH THE CELLULAR EXPORT MACHINERY%REACTOME DATABASE ID RELEASE 77%168333	NEP NS2 INTERACTS WITH THE CELLULAR EXPORT MACHINERY%REACTOME DATABASE ID RELEASE 77%168333	0.00397746	0.0327973	-1	NUP85,AAAS,TPR,NUP35,NUP62,NUP153,NUP54,NUP50,NUP155,RANBP2,RAE1,NUP88,NUP160,NUP210,NUP107,NDC1	-1.73561	-0.595222	16	27
EXPORT OF VIRAL RIBONUCLEOPROTEINS FROM NUCLEUS%REACTOME%R-HSA-168274.3	EXPORT OF VIRAL RIBONUCLEOPROTEINS FROM NUCLEUS%REACTOME%R-HSA-168274.3	0.00397746	0.0327973	-1	NUP85,AAAS,TPR,NUP35,NUP62,NUP153,NUP54,NUP50,NUP155,RANBP2,RAE1,NUP88,NUP160,NUP210,NUP107,NDC1	-1.73561	-0.595222	16	27
CELLULAR METAL ION HOMEOSTASIS%GOBP%GO:0006875	CELLULAR METAL ION HOMEOSTASIS%GOBP%GO:0006875	0.00401495	0.0330164	-1	STC1,THY1,CYBRD1,ATP1A2,ATP2B1,ATP1B1,ATP1A1,SLC9A1,ATP1B2,ITPR1,SLC39A10,WFS1,SLC39A6,CD55,LPAR2,CACNB3,ITPR3,ATP7A,P2RX4,CHERP,CACNA1C,ATP1B3,STOML2,PML,STC2,NPTN,ATP2B4,FKBP1B,VAPB,SLC25A23,ABCB6,CACNA2D1,ISCU,HRC,HSP90B1,FGF2,JPH1,CD36,ATP6V1A,CAV1,S100A8,PDZD8,TFRC,CAPN3,ATP2C1,TGM2,PSEN1	-1.50391	-0.387785	47	142
SENSORY ORGAN DEVELOPMENT%GOBP%GO:0007423	SENSORY ORGAN DEVELOPMENT%GOBP%GO:0007423	0.00402085	0.0330164	-1	COL4A1,THY1,FBN2,FBN1,SLC4A7,LAMA1,COL5A1,EPHB2,MFAP2,JAG2,PITX3,KDM2B,STRA6,PBX3,NRP1,SMCHD1,HDAC1,CACNA1C,SDK2,MYO6,PBX2,KCNQ1	-1.60741	-0.448136	22	81
POSITIVE REGULATION OF IMMUNE SYSTEM PROCESS%GOBP%GO:0002684	POSITIVE REGULATION OF IMMUNE SYSTEM PROCESS%GOBP%GO:0002684	0.00405229	0.0332051	-1	MOSPD2,CADM1,THY1,VAMP8,CD99,TESC,CLU,BTN2A1,STXBP2,YES1,ICAM1,COLEC11,ANO6,LGALS1,IFI16,FLOT2,ADAM17,EPHB2,SLC39A10,ADAM10,CD55,PHB,SIRPA,LYN,P2RX4,PAK1,MMP14,NOD1,DDX58,STOML2,TP53BP1,MAD2L2,AXL,PRKCD,HLA-A,THBS1,PQBP1,IGF2,RHOA,ZNF335,SIN3A,NKAP,RAC1,POLR3F,JAM3,VAMP7,XRCC5,SERPINE1,GAS6,SRC,XRCC6,CAV1,POLR3D,STX4,MFAP4	-1.44108	-0.355965	55	204
TRANSPORT OF MATURE MRNA DERIVED FROM AN INTRONLESS TRANSCRIPT%REACTOME DATABASE ID RELEASE 77%159231	TRANSPORT OF MATURE MRNA DERIVED FROM AN INTRONLESS TRANSCRIPT%REACTOME DATABASE ID RELEASE 77%159231	0.00407299	0.0333052	-1	NUP85,AAAS,TPR,NUP35,NUP62,CPSF2,NUP153,NUP54,FIP1L1,CPSF4,NUP50,NUP155,RANBP2,RAE1,NUP88,NUP160,NCBP1,NCBP2,NUP210,NUP107,NDC1,CPSF3	-1.71981	-0.552151	22	37
ION TRANSPORT BY P-TYPE ATPASES%REACTOME DATABASE ID RELEASE 77%936837	ION TRANSPORT BY P-TYPE ATPASES%REACTOME DATABASE ID RELEASE 77%936837	0.00413155	0.0336662	-1	ATP1A2,ATP2B1,ATP1B1,ATP1A1,ATP1B2,FXYD1,ATP7A,ATP11A,PDZD11,ATP1B3,CAMK2B,ATP2B4,FXYD6	-1.70896	-0.574321	13	30
FORMATION OF THE CORNIFIED ENVELOPE%REACTOME%R-HSA-6809371.3	FORMATION OF THE CORNIFIED ENVELOPE%REACTOME%R-HSA-6809371.3	0.00414508	0.0336662	-1	DSG2,DSC2,PPL,DSP,JUP,PKP3,FURIN,PCSK6,TCHH,PKP4	-1.77757	-0.686914	10	16
CARDIAC ATRIUM DEVELOPMENT%GOBP%GO:0003230	CARDIAC ATRIUM DEVELOPMENT%GOBP%GO:0003230	0.00414508	0.0336662	-1	MYH6,BMP10,ENG,HEY2,NKX2-5	-1.77902	-0.687472	5	16
APOPTOTIC CLEAVAGE OF CELLULAR PROTEINS%REACTOME%R-HSA-111465.3	APOPTOTIC CLEAVAGE OF CELLULAR PROTEINS%REACTOME%R-HSA-111465.3	0.00415145	0.0336662	-1	DSG2,DSP,OCLN,ADD1,CDH1,TJP1,PLEC,PRKCD,CTNNB1	-1.72009	-0.585899	9	28
ACTIVATION OF APC C AND APC C:CDC20 MEDIATED DEGRADATION OF MITOTIC PROTEINS%REACTOME%R-HSA-176814.3	ACTIVATION OF APC C AND APC C:CDC20 MEDIATED DEGRADATION OF MITOTIC PROTEINS%REACTOME%R-HSA-176814.3	0.00426864	0.0345452	1	PSME4,UBE2S,PSMF1,UBE2D1,PSMD9,PSME3,UBE2E1,PSMD5,PSMA5,ANAPC5,PSMB6,PSMD4,PSMA1,ANAPC7,PSMA7,PSMB3,PSMB4,ANAPC1,UBA52,ANAPC4,CDK1,PSMA6,PSMD11,CCNB1	1.63439	0.436037	24	61
GLYCOLYSIS%PANTHER PATHWAY%P00024	GLYCOLYSIS%PANTHER PATHWAY%P00024	0.00428125	0.0345759	-1	HK2,HK2,ENO2,ENO2,PKP3,PFKL,PFKL,ENO1,ENO1	-1.70931	-0.566639	9	32
BICELLULAR TIGHT JUNCTION ASSEMBLY%GOBP%GO:0070830	BICELLULAR TIGHT JUNCTION ASSEMBLY%GOBP%GO:0070830	0.00431779	0.0347682	-1	MARVELD2,POF1B,OCLN,RAB13,CLDN6,DLG1,MPP7	-1.77544	-0.686091	7	16
NOTCH SIGNALING PATHWAY%PANTHER PATHWAY%P00045	NOTCH SIGNALING PATHWAY%PANTHER PATHWAY%P00045	0.00432277	0.0347682	-1	ADAM17,ADAM17,ADAM10,ADAM10,JAG2,JAG2,NOTCH3,NOTCH3,FUT8,FUT8,FUT8,POFUT1,POFUT1,RBPJ,RBPJ,PSEN1,PSEN1,PSEN1,NUMB,NUMB,NUMB	-1.70109	-0.539092	21	39
ODONTOGENESIS%GOBP%GO:0042476	ODONTOGENESIS%GOBP%GO:0042476	0.00435388	0.0349319	-1	ZNF22,LAMB1,COL1A2,COL1A1,HDAC1,SERPINE1,TUFT1	-1.77917	-0.698526	7	15
REGULATION OF SECRETION%GOBP%GO:0051046	REGULATION OF SECRETION%GOBP%GO:0051046	0.00436741	0.0349319	-1	TRH,ADRA2B,STC1,VAMP8,RAB27A,STXBP2,STXBP1,SLC4A8,RAB11FIP1,STXBP3,STX1B,RAB13,C2CD2L,LLGL2,CYP51A1,NMB,LYN,P2RX4,ACSL3,SFRP1,CD2AP,MYOM1,SNAP25,MYO6,ERBB3,RAP1B,RAB8B,TTN,FGG,KCNQ1,TMED10,RHBDF1,RAB10,ADAM9,RAP1A,VAMP7,ARF6,SDCBP,STX4,AGT,ACSL4,RAB8A	-1.48203	-0.379037	42	151
REGULATION OF CELL POPULATION PROLIFERATION%GOBP%GO:0042127	REGULATION OF CELL POPULATION PROLIFERATION%GOBP%GO:0042127	0.00436982	0.0349319	-1	NRAS,LAMB1,BMP10,GRK5,TESC,LAMC1,PODN,CLU,ATF2,KRAS,LAMC2,ENG,JUP,EGFL7,BMP7,IGFBP7,ADAM17,HMGA1,EPHB2,STX3,MENT,ADAM10,SLC9A3R1,NRP2,RNF126,CD55,HMGN5,TJP1,TCIRG1,PHB,ROR2,FN1,MYDGF,ZNF609,TSPYL5,LYN,JAG2,MMP2,SFRP1,SP1,BST2,SFRP5,KDM2B,EPCAM,NRP1,PAK1,S100A6,GNAI2,CHERP,HRAS,HAND2,HDAC1,NKX2-5,RPRD1B,JUN,PDGFB,BRD7,WNK2,ARNT,NUP62,MECP2,PDS5B,ERBB3,ADAMTS1,STK11,MAGI2,HLA-A,CTNNB1,MAZ,IGFBP5,PM…	-1.32605	-0.306089	110	474
FCGR3A-MEDIATED IL10 SYNTHESIS%REACTOME%R-HSA-9664323.1	FCGR3A-MEDIATED IL10 SYNTHESIS%REACTOME%R-HSA-9664323.1	0.00443762	0.0353698	-1	AHCYL1,YES1,ITPR1,ADCY9,ITPR3,LYN	-1.75152	-0.659855	6	18
CA2+ PATHWAY%REACTOME%R-HSA-4086398.3	CA2+ PATHWAY%REACTOME%R-HSA-4086398.3	0.00444591	0.0353698	-1	GNG5,FZD6,GNB4,ITPR1,ITPR3,GNB1,MOV10,WNT11,GNB2,CTNNB1	-1.70861	-0.566404	10	32
REGULATION OF OSSIFICATION%GOBP%GO:0030278	REGULATION OF OSSIFICATION%GOBP%GO:0030278	0.00446207	0.0353698	-1	ATP2B1,FBN2,CHSY1,ANO6,BMP7,SFRP1,BMP2K,S1PR1,ECM1	-1.70465	-0.57287	9	30
ENDOTHELIUM DEVELOPMENT%GOBP%GO:0003158	ENDOTHELIUM DEVELOPMENT%GOBP%GO:0003158	0.004465	0.0353698	-1	MARVELD2,STC1,F11R,ICAM1,TJP1,HEY2,RAP2C,NRP1,RAP1B,CTNNB1,RHOA,RDX,RAP1A,RBPJ,RAPGEF6,RAP2B	-1.69743	-0.532198	16	41
VALIDATED TRANSCRIPTIONAL TARGETS OF AP1 FAMILY MEMBERS FRA1 AND FRA2%PATHWAY INTERACTION DATABASE NCI-NATURE CURATED DATA%VALIDATED TRANSCRIPTIONAL TARGETS OF AP1 FAMILY MEMBERS FRA1 AND FRA2	VALIDATED TRANSCRIPTIONAL TARGETS OF AP1 FAMILY MEMBERS FRA1 AND FRA2%PATHWAY INTERACTION DATABASE NCI-NATURE CURATED DATA%VALIDATED TRANSCRIPTIONAL TARGETS OF AP1 FAMILY MEMBERS FRA1 AND FRA2	0.00446966	0.0353698	-1	COL1A2,LAMA3,PLAUR,DCN,MMP2,SP1,JUN	-1.76478	-0.673264	7	17
PID_FRA_PATHWAY%MSIGDB_C2%PID_FRA_PATHWAY	PID_FRA_PATHWAY%MSIGDB_C2%PID_FRA_PATHWAY	0.0044905	0.0354273	-1	COL1A2,LAMA3,PLAUR,DCN,MMP2,SP1,JUN	-1.75523	-0.678282	7	16
INORGANIC ION HOMEOSTASIS%GOBP%GO:0098771	INORGANIC ION HOMEOSTASIS%GOBP%GO:0098771	0.00449498	0.0354273	-1	STC1,THY1,CYBRD1,ATP1A2,ATP2B1,ATP1B1,ATP1A1,SLC4A8,SLC9A1,ATP1B2,SLC4A7,ITPR1,SLC39A10,WFS1,SLC39A6,CD55,TCIRG1,LPAR2,CACNB3,ITPR3,ANK3,ATP7A,P2RX4,CHERP,CACNA1C,ATP1B3,STOML2,PML,STC2,NPTN,ATP2B4,HEPH,FKBP1B,VAPB,SLC25A23,ABCB6,CACNA2D1,CA2,ISCU,HRC,HSP90B1,FGF2,JPH1,CD36,ATP6V1A,CNNM4,CHP1,CAV1,S100A8,PDZD8,PPT1,HMOX2,TFRC,CAPN3	-1.44497	-0.360993	54	183
CELLULAR RESPONSE TO AMINO ACID STIMULUS%GOBP%GO:0071230	CELLULAR RESPONSE TO AMINO ACID STIMULUS%GOBP%GO:0071230	0.00458605	0.0360043	1	RRAGC,KLHL22,CAPN2,IPO5,LAMTOR3,RPTOR,LAMTOR1,CPEB4,MTOR,FYN,UBR1,UBR2,CPEB3	1.76752	0.627266	13	18
POSITIVE REGULATION OF SODIUM ION TRANSPORT%GOBP%GO:0010765	POSITIVE REGULATION OF SODIUM ION TRANSPORT%GOBP%GO:0010765	0.00459575	0.0360043	-1	AHCYL1,TESC,ATP1B1,SLC9A1,ATP1B2,FXYD1,ANK3,NKX2-5,WNK2,ATP1B3	-1.74537	-0.649297	10	19
REGULATION OF BONE MINERALIZATION%GOBP%GO:0030500	REGULATION OF BONE MINERALIZATION%GOBP%GO:0030500	0.00459575	0.0360043	-1	ATP2B1,FBN2,ANO6,BMP7,BMP2K,S1PR1,ECM1	-1.75262	-0.651996	7	19
VPR-MEDIATED NUCLEAR IMPORT OF PICS%REACTOME DATABASE ID RELEASE 77%180910	VPR-MEDIATED NUCLEAR IMPORT OF PICS%REACTOME DATABASE ID RELEASE 77%180910	0.00461818	0.0360043	-1	PSIP1,HMGA1,NUP85,AAAS,TPR,NUP35,NUP62,NUP153,NUP54,NUP50,NUP155,RANBP2,RAE1,NUP88,NUP160,NUP210,NUP107,NDC1	-1.71872	-0.580553	18	29
HALLMARK_APICAL_JUNCTION%MSIGDB_C2%HALLMARK_APICAL_JUNCTION	HALLMARK_APICAL_JUNCTION%MSIGDB_C2%HALLMARK_APICAL_JUNCTION	0.00461859	0.0360043	-1	THY1,CD99,LAMC2,ICAM5,LAMB3,LAMA3,JUP,FBN1,CLDN6,MPZL1,CTNNA1,SIRPA,B4GALT1,MMP2,VCAN,SDC3,TGFBI,HRAS,LIMA1,BMP1	-1.59953	-0.445421	20	82
APC C-MEDIATED DEGRADATION OF CELL CYCLE PROTEINS%REACTOME DATABASE ID RELEASE 77%174143	APC C-MEDIATED DEGRADATION OF CELL CYCLE PROTEINS%REACTOME DATABASE ID RELEASE 77%174143	0.00463365	0.0360043	1	PSME4,UBE2S,PSMF1,UBE2D1,PSMD9,PSME3,UBE2E1,PSMD5,PSMA5,ANAPC5,PSMB6,PSMD4,PSMA1,ANAPC7,PSMA7,PSMB3,PSMB4,ANAPC1,UBA52,ANAPC4,CDK1,PSMA6,CDK2,PSMD11,CCNB1	1.62605	0.4284	25	66
REGULATION OF MITOTIC CELL CYCLE%REACTOME%R-HSA-453276.2	REGULATION OF MITOTIC CELL CYCLE%REACTOME%R-HSA-453276.2	0.00463365	0.0360043	1	PSME4,UBE2S,PSMF1,UBE2D1,PSMD9,PSME3,UBE2E1,PSMD5,PSMA5,ANAPC5,PSMB6,PSMD4,PSMA1,ANAPC7,PSMA7,PSMB3,PSMB4,ANAPC1,UBA52,ANAPC4,CDK1,PSMA6,CDK2,PSMD11,CCNB1	1.62605	0.4284	25	66
RESPONSE TO DSRNA%GOBP%GO:0043331	RESPONSE TO DSRNA%GOBP%GO:0043331	0.00464157	0.0360043	-1	PDE12,RALB,DDX58,FLOT1,PQBP1,IFNA8,CAV1,COLEC12	-1.74796	-0.666849	8	17
CELL-CELL JUNCTION ORGANIZATION%GOBP%GO:0045216	CELL-CELL JUNCTION ORGANIZATION%GOBP%GO:0045216	0.00469911	0.0363309	-1	MARVELD2,DSG2,POF1B,EPB41L3,DSP,OCLN,JUP,CDH1,RAB13,CD9,TJP1,CLDN6,DLG1,CTNNA1,PKP3,CXADR,PIP5K1C,MPP7,CTNNB1,RHOA,JAM3,PKP4,CNTNAP1,PLEKHA7,ARVCF,LSR,CAMSAP3,MPDZ,ACTB,CTNND1,PKP2	-1.61491	-0.462973	31	68
PID_S1P_S1P2_PATHWAY%MSIGDB_C2%PID_S1P_S1P2_PATHWAY	PID_S1P_S1P2_PATHWAY%MSIGDB_C2%PID_S1P_S1P2_PATHWAY	0.00470219	0.0363309	-1	GNAZ,GNAQ,GNAI3,PAK1,JUN,GNA14,RAC1,GNA11,GNA13,GNAI1	-1.77249	-0.695903	10	15
GLYCOPROTEIN METABOLIC PROCESS%GOBP%GO:0009100	GLYCOPROTEIN METABOLIC PROCESS%GOBP%GO:0009100	0.00471895	0.0363887	-1	CHST14,GPC1,PLOD2,CHSY1,MGAT1,NUDT14,FAM20B,MGAT4C,DPY19L1,ALG2,B4GALT1,ATP7A,ST3GAL4,HS3ST3B1,PLOD1,FBXO17,TMTC3,GXYLT1,ADAMTS9,UGDH,PLOD3,B4GAT1,COG3,CHST12,GXYLT2,FBXO2,FUT8,POFUT1,PCSK6,PXYLP1,ST3GAL1,POMGNT2,UGGT2,NCCRP1,ADAMTS12,ALG5,RNF5,UGGT1,GFPT2,GOLPH3,MGAT5,MGAT4B,CHST11,PRKCSH,POFUT2,EXT2,AMFR,GLCE,DPM1,B3GAT3,CHPF,B3GNT2,ALG11,STT3B,ST3GAL2,ERP44,CHST7,GANAB,GALNT2	-1.49014	-0.384537	59	141
ENDOTHELIAL CELL DIFFERENTIATION%GOBP%GO:0045446	ENDOTHELIAL CELL DIFFERENTIATION%GOBP%GO:0045446	0.00473624	0.0364232	-1	MARVELD2,STC1,F11R,ICAM1,TJP1,HEY2,RAP2C,NRP1,RAP1B,RDX,RAP1A,RBPJ,RAPGEF6,RAP2B	-1.69864	-0.553691	14	34
TAXIS%GOBP%GO:0042330	TAXIS%GOBP%GO:0042330	0.00475126	0.0364232	-1	LAMA2,VSTM2L,LAMC2,EFNB3,BSG,LAMA3,LAMA5,PLAUR,LAMA1,EPHB2,ARHGEF16,RAB13,NRP2,APOA1,SEMA4B,PIP5K1A,CXADR,NRP1,PIP5K1C,HRAS,SEMA4D,PLXND1,PDGFB,S1PR1,SEMA3C,NCAM1,PLD1,SEMA4C,PRKCD,NOTCH3,NPTN,RALBP1,RHOA,ALCAM,KIF5C,RPS6KA5,RHOG,ROBO2,FGF2,RAC1	-1.50382	-0.390717	40	133
CHEMOTAXIS%GOBP%GO:0006935	CHEMOTAXIS%GOBP%GO:0006935	0.00475126	0.0364232	-1	LAMA2,VSTM2L,LAMC2,EFNB3,BSG,LAMA3,LAMA5,PLAUR,LAMA1,EPHB2,ARHGEF16,RAB13,NRP2,APOA1,SEMA4B,PIP5K1A,CXADR,NRP1,PIP5K1C,HRAS,SEMA4D,PLXND1,PDGFB,S1PR1,SEMA3C,NCAM1,PLD1,SEMA4C,PRKCD,NOTCH3,NPTN,RALBP1,RHOA,ALCAM,KIF5C,RPS6KA5,RHOG,ROBO2,FGF2,RAC1	-1.50382	-0.390717	40	133
CHONDROITIN SULFATE DERMATAN SULFATE METABOLISM%REACTOME DATABASE ID RELEASE 77%1793185	CHONDROITIN SULFATE DERMATAN SULFATE METABOLISM%REACTOME DATABASE ID RELEASE 77%1793185	0.00479101	0.0366192	-1	CHST14,HSPG2,GPC1,CHSY1,BGN,AGRN,CSPG4,DCN,VCAN,SDC3,CHST12,GPC3	-1.68257	-0.562111	12	31
POSITIVE REGULATION OF PROTEIN UBIQUITINATION%GOBP%GO:0031398	POSITIVE REGULATION OF PROTEIN UBIQUITINATION%GOBP%GO:0031398	0.00479549	0.0366192	1	PTTG1IP,PIN1,COMMD1,UBE2N,RCHY1,DCUN1D2,PTEN,UBE2S,PRICKLE1,PDCD6,TRAF6,UBE2D1,AMER1,PEF1,RPS2	1.6087	0.432524	15	59
POSITIVE REGULATION OF LEUKOCYTE MIGRATION%GOBP%GO:0002687	POSITIVE REGULATION OF LEUKOCYTE MIGRATION%GOBP%GO:0002687	0.00483871	0.0368775	-1	MOSPD2,THY1,CD99,ICAM1,ANO6,ADAM17,ADAM10,P2RX4,THBS1,RHOA,RAC1,JAM3,SERPINE1,GAS6	-1.70264	-0.543215	14	38
PLATELET ACTIVATION, SIGNALING AND AGGREGATION%REACTOME%R-HSA-76002.3	PLATELET ACTIVATION, SIGNALING AND AGGREGATION%REACTOME%R-HSA-76002.3	0.00486855	0.0370331	-1	GNG5,ADRA2B,CLU,STXBP2,GNB4,ITPR1,GNAQ,GNA12,STXBP3,CD109,CD9,GNAI3,APOA1,ITPR3,FN1,GNB1,LYN,GNAI2,TMX3,PDGFB,GNB2,SERPINA1,RAP1B,PRKCD,THBS1,ECM1,TTN,FGG,TAGLN2,A2M,IGF2,GNA14,RHOA,TOR4A,TIMP3,CHID1,F13A1,RHOG,RAP1A,RAC1,GNA11,SERPINE1,GAS6,CD36,SRC,ENDOD1,GNA13,STX4	-1.49229	-0.385652	48	139
REGULATION OF POSTSYNAPSE ORGANIZATION%GOBP%GO:0099175	REGULATION OF POSTSYNAPSE ORGANIZATION%GOBP%GO:0099175	0.00488055	0.0370526	1	DBN1,SIPA1L1,RELN,VPS35,PTEN,CFL1,CRIPT,HOMER1,CAPRIN1,DBNL,LRP8	1.69235	0.515693	11	33
ALPHA6BETA4INTEGRIN%NETPATH%ALPHA6BETA4INTEGRIN	ALPHA6BETA4INTEGRIN%NETPATH%ALPHA6BETA4INTEGRIN	0.00490584	0.0371726	-1	LAMB1,LAMC1,YES1,LAMC2,DSP,LAMB3,LAMA3,ITGA6,LAMA5,LAMA1,LAMB2,EPHB2,PLEC,PAK1,JUN	-1.6753	-0.51427	15	46
SYNDECAN-2-MEDIATED SIGNALING EVENTS%PATHWAY INTERACTION DATABASE NCI-NATURE CURATED DATA%SYNDECAN-2-MEDIATED SIGNALING EVENTS	SYNDECAN-2-MEDIATED SIGNALING EVENTS%PATHWAY INTERACTION DATABASE NCI-NATURE CURATED DATA%SYNDECAN-2-MEDIATED SIGNALING EVENTS	0.00498753	0.0377188	-1	LAMA3,EPB41,LAMA1,EPHB2,FN1,MMP2,HRAS,PRKCD,RHOA,SRC,SDCBP,ITGA2,TGFB1,CASK	-1.70565	-0.589681	14	26
VESICLE TRANSPORT ALONG MICROTUBULE%GOBP%GO:0047496	VESICLE TRANSPORT ALONG MICROTUBULE%GOBP%GO:0047496	0.00504032	0.0380447	1	TRAK1,DYNC1H1,AP3S2,AP3D1,DYNC1I1,NDEL1,FYCO1,AP3B1,KIF13A,KIF1C,PAFAH1B1,BLOC1S4,AP3S1,NDE1,KIF5B,BLOC1S5	1.73156	0.551861	16	27
BIOCARTA_ECM_PATHWAY%MSIGDB_C2%BIOCARTA_ECM_PATHWAY	BIOCARTA_ECM_PATHWAY%MSIGDB_C2%BIOCARTA_ECM_PATHWAY	0.00516432	0.038717	1	PIK3R1,PIK3CA,TLN1,PFN1,RAF1,MYL2,MAPK1,SHC1	1.78231	0.662917	8	15
PROTEIN DEPHOSPHORYLATION%GOBP%GO:0006470	PROTEIN DEPHOSPHORYLATION%GOBP%GO:0006470	0.00516874	0.038717	1	EYA4,MTMR3,PPP2R3B,PHPT1,DUSP3,PTEN,PTPN11,PGP,ILKAP,PPP2R5E,CTTNBP2NL,PPM1B,PPP2R1A,RPAP2,PPP2R5A,PTPN21,TIMM50,MTMR6,PPP2R2D,PPP3CB,SSH1,PPP2R3A,DUSP12,PDP1,PPP5C,PPM1A,PTPN12	1.59252	0.404952	27	80
NEGATIVE REGULATION OF RNA BIOSYNTHETIC PROCESS%GOBP%GO:1902679	NEGATIVE REGULATION OF RNA BIOSYNTHETIC PROCESS%GOBP%GO:1902679	0.00516885	0.038717	-1	LOXL3,ZNF589,PRDM16,CENPV,HELLS,IFI16,BMP7,AEBP1,SP100,HMGA1,IKZF4,LOXL2,WFS1,HEY2,DLG1,CBFA2T2,PHF21A,PHB,PARP1,ZNF436,RCOR2,DPY30,SFRP1,KDM2B,WNT11,LYAR,GTF2IRD1,SMCHD1,CRY2,ZBTB33,SCAF4,SEMA4D,HDAC1,NKX2-5,ENO1,TPR,CBX8,DPF2,JUN,PDGFB,MTF2,BRD7,ATF7IP,CBX5,MAD2L2,MECP2,CREM,THRA,RBAK,CTNNB1,AASS,MTDH,MAZ,PML,ZNF281,KDM5C,ZNF555,CBX3,YEATS2,IGF2,BIRC5,EZH1,PDCD4,HNRNPU,RXRA,ZMYND11,SIN3A,SCAF8,…	-1.32061	-0.304406	189	483
NEGATIVE REGULATION OF NUCLEIC ACID-TEMPLATED TRANSCRIPTION%GOBP%GO:1903507	NEGATIVE REGULATION OF NUCLEIC ACID-TEMPLATED TRANSCRIPTION%GOBP%GO:1903507	0.00516885	0.038717	-1	LOXL3,ZNF589,PRDM16,CENPV,HELLS,IFI16,BMP7,AEBP1,SP100,HMGA1,IKZF4,LOXL2,WFS1,HEY2,DLG1,CBFA2T2,PHF21A,PHB,PARP1,ZNF436,RCOR2,DPY30,SFRP1,KDM2B,WNT11,LYAR,GTF2IRD1,SMCHD1,CRY2,ZBTB33,SCAF4,SEMA4D,HDAC1,NKX2-5,ENO1,TPR,CBX8,DPF2,JUN,PDGFB,MTF2,BRD7,ATF7IP,CBX5,MAD2L2,MECP2,CREM,THRA,RBAK,CTNNB1,AASS,MTDH,MAZ,PML,ZNF281,KDM5C,ZNF555,CBX3,YEATS2,IGF2,BIRC5,EZH1,PDCD4,HNRNPU,RXRA,ZMYND11,SIN3A,SCAF8,…	-1.32061	-0.304406	189	483
REGULATION OF IMMUNE EFFECTOR PROCESS%GOBP%GO:0002697	REGULATION OF IMMUNE EFFECTOR PROCESS%GOBP%GO:0002697	0.00523247	0.039119	-1	CADM1,VAMP8,SERPINB9,STXBP2,LOXL3,ICAM1,EPHB2,APOA1,CD55,PHB,LYN,BST2,DDX58,CD59,TP53BP1,MAD2L2,HLA-A,A2M,THOC1	-1.59964	-0.448943	19	78
METAL ION HOMEOSTASIS%GOBP%GO:0055065	METAL ION HOMEOSTASIS%GOBP%GO:0055065	0.00525536	0.0392154	-1	STC1,THY1,CYBRD1,ATP1A2,ATP2B1,ATP1B1,ATP1A1,SLC9A1,ATP1B2,ITPR1,SLC39A10,WFS1,SLC39A6,CD55,LPAR2,CACNB3,ITPR3,ANK3,ATP7A,P2RX4,CHERP,CACNA1C,ATP1B3,STOML2,PML,STC2,NPTN,ATP2B4,HEPH,FKBP1B,VAPB,SLC25A23,ABCB6,CACNA2D1,ISCU,HRC,HSP90B1,FGF2,JPH1,CD36,ATP6V1A,CNNM4,CAV1,S100A8,PDZD8,HMOX2,TFRC,CAPN3	-1.47523	-0.374613	48	159
A TETRASACCHARIDE LINKER SEQUENCE IS REQUIRED FOR GAG SYNTHESIS%REACTOME DATABASE ID RELEASE 77%1971475	A TETRASACCHARIDE LINKER SEQUENCE IS REQUIRED FOR GAG SYNTHESIS%REACTOME DATABASE ID RELEASE 77%1971475	0.0052766	0.0392991	-1	HSPG2,GPC1,BGN,AGRN,CSPG4,DCN,VCAN,SDC3	-1.73517	-0.645501	8	19
TRANSPORT OF THE SLBP INDEPENDENT MATURE MRNA%REACTOME DATABASE ID RELEASE 77%159227	TRANSPORT OF THE SLBP INDEPENDENT MATURE MRNA%REACTOME DATABASE ID RELEASE 77%159227	0.00528838	0.0393123	-1	NUP85,AAAS,TPR,NUP35,NUP62,NUP153,NUP54,NUP50,NUP155,RANBP2,RAE1,NUP88,NUP160,NCBP1,NCBP2,NUP210,NUP107,NDC1	-1.68377	-0.565854	18	30
CLASS A 1 (RHODOPSIN-LIKE RECEPTORS)%REACTOME DATABASE ID RELEASE 77%373076	CLASS A 1 (RHODOPSIN-LIKE RECEPTORS)%REACTOME DATABASE ID RELEASE 77%373076	0.00532921	0.0394873	-1	TRH,ADRA2B,LPAR2,NMB,S1PR1	-1.73617	-0.662351	5	17
MITOCHONDRION ORGANIZATION%GOBP%GO:0007005	MITOCHONDRION ORGANIZATION%GOBP%GO:0007005	0.00533204	0.0394873	1	MAP1LC3B,APOOL,TIMM17A,DNM1L,CLUH,VPS35,ALKBH7,MSTO1,TRAK1,MFN2,COX16,PARK7,RHOT2,NDUFAF5,SURF1,RB1CC1,ATG5,UQCC3,MFN1,SQSTM1,UQCC1,CHCHD4,TIMM8B,TIMM13,HSP90AA1,GBA,ATPAF1,TMEM70,TOMM34,WIPI1,BCL2L1,SPG7,WDR45,MOAP1,TIMM50,SDHAF1,COA3,BID,SCO2,ATG14,ATG7,MIEF1,ATPAF2,BAD,TOMM7,GSK3B,ATG9A,TIMM23,VPS13D,TMEM11,HSD17B10,ATAD3A,MIPEP,GGCT,GABARAPL2,SLC35F6,SLC25A5,USP30,THG1L,COX14,TOMM22,SCO1,HSPA…	1.35436	0.294302	93	247
DE NOVO PYRIMIDINE DEOXYRIBONUCLEOTIDE BIOSYNTHESIS%PANTHER PATHWAY%P02739	DE NOVO PYRIMIDINE DEOXYRIBONUCLEOTIDE BIOSYNTHESIS%PANTHER PATHWAY%P02739	0.00538292	0.039789	1	NME2,NME2,NME1,NME1,TYMS,TYMS,TYMS,DUT,DUT,DUT,RRM1,RRM1,RRM1,NME4,NME4,NME3,NME3,NME3,DTYMK,DTYMK	1.73955	0.59086	20	21
TISSUE MORPHOGENESIS%GOBP%GO:0048729	TISSUE MORPHOGENESIS%GOBP%GO:0048729	0.00541291	0.0399355	-1	MYH6,COL4A1,STC1,BMP10,DSP,FOLR1,ENG,LAMA3,LIN7C,LAMA5,BMP7,ADAM17,COL5A1,SLC9A3R1,TCAP,PODXL,HEY2,CD44,NPNT,ATP7A,KDM2B,NRP1,WNT11,PAK1,NKX2-5,S1PR1,TRAF3IP1,SEMA4C,MYBPC3,CTNNB1,TTN,FLRT3,GPC3,RHOA,RAB10,ROBO2,NOG,FGF2,RBPJ,MYL3	-1.48096	-0.382167	40	141
POSITIVE REGULATION OF CHOLESTEROL TRANSPORT%GOBP%GO:0032376	POSITIVE REGULATION OF CHOLESTEROL TRANSPORT%GOBP%GO:0032376	0.00557297	0.0409624	-1	LRP1,APOA1,LIPG,ABCA8,LDLRAP1,RXRA,CAV1,ANXA2,SIRT1,ABCA3	-1.75125	-0.687566	10	15
POSITIVE REGULATION OF STEROL TRANSPORT%GOBP%GO:0032373	POSITIVE REGULATION OF STEROL TRANSPORT%GOBP%GO:0032373	0.00557297	0.0409624	-1	LRP1,APOA1,LIPG,ABCA8,LDLRAP1,RXRA,CAV1,ANXA2,SIRT1,ABCA3	-1.75125	-0.687566	10	15
ANGIOTENSIN_II-STIMULATED_SIGNALING_THROUGH_G_PROTEINS_AND_BETA-ARRESTIN%PANTHER PATHWAY%P05911	ANGIOTENSIN_II-STIMULATED_SIGNALING_THROUGH_G_PROTEINS_AND_BETA-ARRESTIN%PANTHER PATHWAY%P05911	0.0056971	0.0417965	-1	GRK5,GRK5,GNB4,GNB4,ITPR1,ITPR1,GNAQ,GNAQ,GNAQ,ITPR3,ITPR3,GNB1,GNB1,GNB1,GNB2,GNB2,GNB2	-1.65534	-0.508144	17	46
POSITIVE REGULATION OF UBIQUITIN-PROTEIN TRANSFERASE ACTIVITY%GOBP%GO:0051443	POSITIVE REGULATION OF UBIQUITIN-PROTEIN TRANSFERASE ACTIVITY%GOBP%GO:0051443	0.00573477	0.0419943	1	PIN1,UBE2N,DCUN1D2,PTEN,UBE2S,RPS2	1.75686	0.631994	6	17
PROTEIN LOCALIZATION TO MEMBRANE%GOBP%GO:0072657	PROTEIN LOCALIZATION TO MEMBRANE%GOBP%GO:0072657	0.00576184	0.042114	-1	THY1,CACNB2,TESC,ATP1B1,EPB41L3,F11R,STXBP1,BSG,LIN7C,JUP,FGF13,EHD2,TTC7B,CDH1,FLOT2,STX1B,STX3,AGRN,TRAM1,RAB13,SLC9A3R1,MYO1C,SYNE3,CACNB3,DLG1,TSPAN15,PKP3,ANK3,PIP5K1A,PDZD11,EFR3A,ZDHHC14,ATP1B3,FLOT1,MAGI2,RAB8B,KRT18,ZDHHC20,NUP54,SEC61B,MAP7,RAB10,VAMP5,S100A10,RDX,RAP1A,RAPGEF6,GAS6,NUP155,SDCBP,CAV1,PDZK1,VPS37A,SIL1,LIN7A,SEC62,RAB8A,MMGT1,ITGB1BP1,INPP5K,CAPN3,SH3PXD2B,REEP1	-1.41368	-0.345424	63	229
NUCLEOTIDE-BINDING DOMAIN, LEUCINE RICH REPEAT CONTAINING RECEPTOR (NLR) SIGNALING PATHWAYS%REACTOME DATABASE ID RELEASE 77%168643	NUCLEOTIDE-BINDING DOMAIN, LEUCINE RICH REPEAT CONTAINING RECEPTOR (NLR) SIGNALING PATHWAYS%REACTOME DATABASE ID RELEASE 77%168643	0.00579637	0.0422577	1	UBE2N,AAMP,TRAF6,IRAK1,ITCH,CASP9,SUGT1,BCL2L1,NFKB1,IKBKB,TAB2,HSP90AB1,UBE2V1,TXN,MAPK14	1.72238	0.548937	15	27
POST-TRANSLATIONAL MODIFICATION: SYNTHESIS OF GPI-ANCHORED PROTEINS%REACTOME%R-HSA-163125.2	POST-TRANSLATIONAL MODIFICATION: SYNTHESIS OF GPI-ANCHORED PROTEINS%REACTOME%R-HSA-163125.2	0.00580304	0.0422577	-1	THY1,RECK,CPM,PLAUR,CD109,PIGX,ALPL,PIGG,DPM1,PIGK,LSAMP,PIGO	-1.71896	-0.647591	12	18
IMMUNE RESPONSE%GOBP%GO:0006955	IMMUNE RESPONSE%GOBP%GO:0006955	0.00583885	0.0424398	-1	CADM1,LGALS8,VAMP8,SERPINB9,CLU,STXBP2,YES1,ICAM1,COLEC11,IFI16,MFHAS1,ADAM17,STXBP3,SP100,LRP1,CRIP1,DOCK11,CD55,PXDN,PHB,SIRPA,ATP7A,ADAR,LYN,TCF12,MOV10,TRIM25,PDE12,BST2,NOD1,SEMA4D,DDX58,GNL1,SEMA3C,SETD2,SHMT2,GBP1,BNIP3,HLA-C,PRKCD,HLA-A,IFIT5,PML,THBS1,PQBP1,IFNA8,ZMYND11,JAK1,TRIM27,VAMP7,SIPA1,SERPINE1,AKAP1,SRC,SNAP23,S100A8,MFAP4	-1.41212	-0.347985	57	208
PID_ENDOTHELIN_PATHWAY%MSIGDB_C2%PID_ENDOTHELIN_PATHWAY	PID_ENDOTHELIN_PATHWAY%MSIGDB_C2%PID_ENDOTHELIN_PATHWAY	0.00597808	0.0433715	-1	COL1A2,GNAZ,GNAQ,ADCY9,GNAI3,HRAS,JUN,GNA14,RAC1,GNA11,SRC,COL3A1,GNAI1	-1.68272	-0.573168	13	28
HALLMARK_ESTROGEN_RESPONSE_EARLY%MSIGDB_C2%HALLMARK_ESTROGEN_RESPONSE_EARLY	HALLMARK_ESTROGEN_RESPONSE_EARLY%MSIGDB_C2%HALLMARK_ESTROGEN_RESPONSE_EARLY	0.00599251	0.0433959	-1	OLFML3,ADD3,LAD1,ADCY9,SLC9A3R1,WFS1,SLC39A6,THSD4,MYOF,CD44,FKBP5,B4GALT1,KDM4B,PRSS23,FARP1,DHCR7,AFF1,PAPSS2,KRT18,STC2,SLC1A4,MPPED2,GLA,FLNB,ENDOD1,PDZK1,RHOBTB3,CELSR2,REEP1	-1.57626	-0.443407	29	77
CELL ACTIVATION%GOBP%GO:0001775	CELL ACTIVATION%GOBP%GO:0001775	0.0060274	0.0435682	-1	CADM1,VAMP8,CLU,STXBP2,ICAM1,STXBP1,HELLS,CD93,ADAM17,STXBP3,EPHB2,CD9,LRP1,ADAM10,DOCK11,CD44,PHB,FN1,GNAS,BMPER,ATP7A,P2RX4,JAG2,CXADR,STOML2,CSRP1,AXL,PRKCD,HLA-A,FGG,IFNA8,ADAM9,VAMP7,TPD52,SRC,RAP2B,TGFBR1,SNAP23,TCF3,PLAT,FIBP	-1.47355	-0.377988	41	147
RESPONSE TO AMINO ACID%GOBP%GO:0043200	RESPONSE TO AMINO ACID%GOBP%GO:0043200	0.00605767	0.0437065	1	RRAGC,KLHL22,CAPN2,IPO5,LAMTOR3,RPTOR,LAMTOR1,CPEB4,MTOR,FYN,UBR1,UBR2,CPEB3	1.74051	0.607693	13	19
CALCIUM ION TRANSPORT%GOBP%GO:0006816	CALCIUM ION TRANSPORT%GOBP%GO:0006816	0.00615433	0.0443225	-1	CACNB2,ATP2B1,ANO6,ITPR1,CACNB3,ITPR3,P2RX4,CHERP,CACNA1C,STOML2,ATP2B4,SLC25A23,CACNA2D1,FGF2,JPH1,GAS6,CAV1	-1.64495	-0.499089	17	49
HOMOPHILIC CELL ADHESION VIA PLASMA MEMBRANE ADHESION MOLECULES%GOBP%GO:0007156	HOMOPHILIC CELL ADHESION VIA PLASMA MEMBRANE ADHESION MOLECULES%GOBP%GO:0007156	0.00618936	0.0444931	-1	DSG2,CADM1,VSTM2L,BSG,CDH1,SDK2,NPTN,ROBO2	-1.68436	-0.58816	8	25
ENDOTHELIAL CELL DEVELOPMENT%GOBP%GO:0001885	ENDOTHELIAL CELL DEVELOPMENT%GOBP%GO:0001885	0.0062342	0.0447335	-1	MARVELD2,STC1,F11R,ICAM1,TJP1,RAP2C,RAP1B,RDX,RAP1A,RAPGEF6,RAP2B	-1.68292	-0.598862	11	23
ANTEROGRADE TRANS-SYNAPTIC SIGNALING%GOBP%GO:0098916	ANTEROGRADE TRANS-SYNAPTIC SIGNALING%GOBP%GO:0098916	0.00627897	0.0448906	-1	MPP2,CACNB2,STXBP2,AKAP5,STXBP1,LIN7C,STXBP3,STX1B,STX3,CNP,CACNB3,DLG1,PCDHB14,SLC32A1,PIP5K1C,PDZD11,DTNA,STX2,SNAP25	-1.58067	-0.443616	19	78
CHEMICAL SYNAPTIC TRANSMISSION%GOBP%GO:0007268	CHEMICAL SYNAPTIC TRANSMISSION%GOBP%GO:0007268	0.00627897	0.0448906	-1	MPP2,CACNB2,STXBP2,AKAP5,STXBP1,LIN7C,STXBP3,STX1B,STX3,CNP,CACNB3,DLG1,PCDHB14,SLC32A1,PIP5K1C,PDZD11,DTNA,STX2,SNAP25	-1.58067	-0.443616	19	78
AXO-DENDRITIC TRANSPORT%GOBP%GO:0008088	AXO-DENDRITIC TRANSPORT%GOBP%GO:0008088	0.00631247	0.0450481	1	HSPA8,TRAK1,HSPB1,DYNC1H1,ACTR10,AP3S2,AP3D1,SPG11,AP3B1,NEFL,DCTN1,KIF1C,MAPK8IP3,PAFAH1B1,KIF1B,BLOC1S4,AP3S1	1.71505	0.506135	17	38
KERATAN SULFATE KERATIN METABOLISM%REACTOME%R-HSA-1638074.1	KERATAN SULFATE KERATIN METABOLISM%REACTOME%R-HSA-1638074.1	0.00636067	0.0453097	-1	CHST6,LUM,FMOD,PRELP,B4GALT4,B4GALT1,ST3GAL4	-1.71842	-0.655579	7	17
HOMOTYPIC CELL-CELL ADHESION%GOBP%GO:0034109	HOMOTYPIC CELL-CELL ADHESION%GOBP%GO:0034109	0.00638402	0.0453936	-1	DSG2,DSC2,CD99,STXBP1,DSP,CTNNA3,JUP,STXBP3,FN1,GNAS,CXADR,CSRP1,FGG	-1.67519	-0.550631	13	33
AMB2 INTEGRIN SIGNALING%PATHWAY INTERACTION DATABASE NCI-NATURE CURATED DATA%AMB2 INTEGRIN SIGNALING	AMB2 INTEGRIN SIGNALING%PATHWAY INTERACTION DATABASE NCI-NATURE CURATED DATA%AMB2 INTEGRIN SIGNALING	0.00644375	0.0456605	-1	THY1,ICAM1,PLAUR,LRP1,MMP2,RAP1B,RHOA,RAP1A,JAM3,PLAT,MYH2	-1.72308	-0.676504	11	15
PID_TXA2PATHWAY%MSIGDB_C2%PID_TXA2PATHWAY	PID_TXA2PATHWAY%MSIGDB_C2%PID_TXA2PATHWAY	0.00646809	0.0456605	-1	YES1,GNAQ,SLC9A3R1,GNB1,LYN,GNA14,RAC1,GNA11,SRC,GNA13	-1.71707	-0.638771	10	19
VASOPRESSIN REGULATES RENAL WATER HOMEOSTASIS VIA AQUAPORINS%REACTOME%R-HSA-432040.2	VASOPRESSIN REGULATES RENAL WATER HOMEOSTASIS VIA AQUAPORINS%REACTOME%R-HSA-432040.2	0.00646809	0.0456605	-1	GNG5,GNB4,ADCY9,GNB1,GNAS,GNB2	-1.71527	-0.638099	6	19
AQUAPORIN-MEDIATED TRANSPORT%REACTOME%R-HSA-445717.2	AQUAPORIN-MEDIATED TRANSPORT%REACTOME%R-HSA-445717.2	0.00646809	0.0456605	-1	GNG5,GNB4,ADCY9,GNB1,GNAS,GNB2	-1.71527	-0.638099	6	19
MUSCLE TISSUE MORPHOGENESIS%GOBP%GO:0060415	MUSCLE TISSUE MORPHOGENESIS%GOBP%GO:0060415	0.00651678	0.0458394	-1	MYH6,BMP10,DSP,ENG,TCAP,HEY2,NKX2-5,S1PR1,MYBPC3,TTN,NOG,RBPJ,MYL3,TGFBR1,TNNC1,PKP2,TBX20,MYH7,TGFB1,RYR2,TPM1	-1.66413	-0.534273	21	37
MUSCLE ORGAN MORPHOGENESIS%GOBP%GO:0048644	MUSCLE ORGAN MORPHOGENESIS%GOBP%GO:0048644	0.00651678	0.0458394	-1	MYH6,BMP10,DSP,ENG,TCAP,HEY2,NKX2-5,S1PR1,MYBPC3,TTN,NOG,RBPJ,MYL3,TGFBR1,TNNC1,PKP2,TBX20,MYH7,TGFB1,RYR2,TPM1	-1.66413	-0.534273	21	37
CALCIUM ION TRANSPORT INTO CYTOSOL%GOBP%GO:0060402	CALCIUM ION TRANSPORT INTO CYTOSOL%GOBP%GO:0060402	0.00653258	0.0458683	-1	ITPR1,CACNB3,ITPR3,CHERP,CACNA1C,ATP2B4,CACNA2D1,FGF2,JPH1	-1.71137	-0.652888	9	17
INORGANIC CATION IMPORT ACROSS PLASMA MEMBRANE%GOBP%GO:0098659	INORGANIC CATION IMPORT ACROSS PLASMA MEMBRANE%GOBP%GO:0098659	0.0066912	0.0468146	-1	ATP1A2,ATP1B1,ATP1A1,SLC9A1,ATP1B2,SLC39A10,SLC39A6,ATP1B3,KCNJ8,ATP2B4,CACNA2D1	-1.66973	-0.583052	11	25
INORGANIC ION IMPORT ACROSS PLASMA MEMBRANE%GOBP%GO:0099587	INORGANIC ION IMPORT ACROSS PLASMA MEMBRANE%GOBP%GO:0099587	0.0066912	0.0468146	-1	ATP1A2,ATP1B1,ATP1A1,SLC9A1,ATP1B2,SLC39A10,SLC39A6,ATP1B3,KCNJ8,ATP2B4,CACNA2D1	-1.66973	-0.583052	11	25
CELLULAR RESPONSE TO ORGANIC CYCLIC COMPOUND%GOBP%GO:0071407	CELLULAR RESPONSE TO ORGANIC CYCLIC COMPOUND%GOBP%GO:0071407	0.0067359	0.0470434	-1	PCK2,ATP1A2,ATP1A1,SLC9A1,FOLR1,JUP,CDH1,BMP7,GNAI3,PHB,CTNNA1,GNB1,GNAS,P2RX4,SFRP1,PDE12,RALB,PDGFB,DDX58,FLOT1,RAP1B,CTNNB1,IGFBP5,KDM3A,ATP2B4,KCNQ1,PQBP1,UBE3A,GNA14,HNRNPU,HSP90B1,RAP1A,ARID1A,GNA11,SRC,CAV1,GNAI1,INPP5K,COLEC12,TGM2,PPP1R9B,GOLPH3,ACTB,AQP1,TMF1,RBFOX2,SLC26A6,TGFB1,RYR2	-1.49203	-0.39033	49	125
CARBOHYDRATE DERIVATIVE BIOSYNTHETIC PROCESS%GOBP%GO:1901137	CARBOHYDRATE DERIVATIVE BIOSYNTHETIC PROCESS%GOBP%GO:1901137	0.00676115	0.0471098	-1	CHST6,CHST14,PLOD2,CHSY1,MGAT1,NUDT14,FAM20B,MGAT4C,ADCY9,DPY19L1,ALG2,B4GALT1,ATP7A,ST3GAL4,HSD17B12,ACSL3,HS3ST3B1,PLOD1,TMTC3,GXYLT1,STOML2,UGDH,PAPSS2,PLOD3,DCTD,B4GAT1,COG3,UMPS,CHST12,HS3ST1,GXYLT2,FUT8,HACD2,POFUT1,PDHX,PXYLP1,ST3GAL1,POMGNT2,UGGT2,ALG5,ACSL4,UGGT1,PPT1,HACD1,SLC25A1,PAPSS1,ACSF3,GFPT2,GUK1,GOLPH3,MGAT5,MGAT4B,CHST11,PIGG,G6PD,TKT,TGFB1,POFUT2,EXT2,TECR,GLCE,DPM1,PIGK,B3GA…	-1.40565	-0.346562	73	207
G PROTEIN-COUPLED RECEPTOR SIGNALING PATHWAY%GOBP%GO:0007186	G PROTEIN-COUPLED RECEPTOR SIGNALING PATHWAY%GOBP%GO:0007186	0.00676941	0.0471098	-1	GNG5,ADRA2B,AHCYL1,GRK5,GNAZ,AKAP5,GNB4,IQGAP2,GNAQ,GNA12,AGRN,ADCY9,GNAI3,APOA1,LPAR2,ITPR3,GNB1,LMBRD2,GNAS,AKAP12,GNAI2,S1PR1,GNB2,RGS19,GABBR1,GNA14,CA2,RAC1,GNA11,SRC,CAV1,GNA13,AGT,GNAI1,INPP5K,CELSR2	-1.51832	-0.407642	36	104
SWITCHING OF ORIGINS TO A POST-REPLICATIVE STATE%REACTOME%R-HSA-69052.3	SWITCHING OF ORIGINS TO A POST-REPLICATIVE STATE%REACTOME%R-HSA-69052.3	0.00682898	0.0474403	1	PSME4,UBE2S,PSMF1,UBE2D1,PSMD9,PSME3,UBE2E1,PSMD5,PSMA5,ANAPC5,PSMB6,PSMD4,CCNE1,PSMA1,ANAPC7,PSMA7,PSMB3,PSMB4,ANAPC1,UBA52,ANAPC4,PSMA6,CDK2,PSMD11,ORC5	1.58789	0.413336	25	71
IL2 SIGNALING EVENTS MEDIATED BY PI3K%PATHWAY INTERACTION DATABASE NCI-NATURE CURATED DATA%IL2 SIGNALING EVENTS MEDIATED BY PI3K	IL2 SIGNALING EVENTS MEDIATED BY PI3K%PATHWAY INTERACTION DATABASE NCI-NATURE CURATED DATA%IL2 SIGNALING EVENTS MEDIATED BY PI3K	0.00685099	0.0475091	1	PIK3R1,PIK3CA,PTPN11,HSP90AA1,SMPD1,BCL2L1,NFKB1,SHC1,EIF3A,MTOR,SOS1,RPS6,FOXO3,SGMS1	1.71161	0.581372	14	21
ION HOMEOSTASIS%GOBP%GO:0050801	ION HOMEOSTASIS%GOBP%GO:0050801	0.00694809	0.0480974	-1	STC1,THY1,CYBRD1,ATP1A2,ATP2B1,ATP1B1,ATP1A1,SLC4A8,SLC9A1,ATP1B2,SLC4A7,ITPR1,SLC39A10,WFS1,SLC39A6,CD55,TCIRG1,LPAR2,DCN,CACNB3,ITPR3,ANK3,ATP7A,P2RX4,CHERP,GLS,CACNA1C,WNK2,ATP1B3,STOML2,PML,STC2,NPTN,ATP2B4,HEPH,FKBP1B,VAPB,SLC25A23,ABCB6,CACNA2D1,CA2,ISCU,HRC,HSP90B1,FGF2,JPH1,CD36,SRC,ATP6V1A,CNNM4,CHP1,CAV1,S100A8,PDZD8,PPT1,HMOX2,TFRC,CAPN3	-1.41001	-0.349252	58	198
VESICLE DOCKING INVOLVED IN EXOCYTOSIS%GOBP%GO:0006904	VESICLE DOCKING INVOLVED IN EXOCYTOSIS%GOBP%GO:0006904	0.00697872	0.0481661	-1	STXBP2,STXBP1,STXBP3,STX1B,RAB13,SNAP25,RAB8B,RAB10	-1.70478	-0.634199	8	19
CYTOSOLIC CALCIUM ION TRANSPORT%GOBP%GO:0060401	CYTOSOLIC CALCIUM ION TRANSPORT%GOBP%GO:0060401	0.00698254	0.0481661	-1	ATP2B1,ITPR1,CACNB3,ITPR3,CHERP,CACNA1C,ATP2B4,SLC25A23,CACNA2D1,FGF2,JPH1	-1.66485	-0.575576	11	26
ENDOSOMAL TRANSPORT%GOBP%GO:0016197	ENDOSOMAL TRANSPORT%GOBP%GO:0016197	0.00699558	0.0481713	1	RILP,DENND1B,DENND5A,SNX2,VPS35,TBC1D17,ARHGAP1,VPS26B,ANKRD50,RAB9B,DCLK1,CHMP7,AP5S1,CHMP3,SNX3,SQSTM1,PTPN23,SNX12,SNX17,SNX5,CLN5,VPS51,AP3D1,AP5Z1,YKT6,SORT1,EHD1,HEATR5A,TBC1D10A,LAMTOR1,CLEC16A,VPS4A,VPS36,VCP,CCDC22,TBC1D10B,CHMP1B,HGS,SPAG9,VPS28,SNX8,UBE2O,DCTN1,UBXN6,SNX6,TOM1,SNX27,VPS39	1.43273	0.331115	48	148
LEUKOCYTE ACTIVATION%GOBP%GO:0045321	LEUKOCYTE ACTIVATION%GOBP%GO:0045321	0.0070534	0.0484844	-1	CADM1,VAMP8,CLU,STXBP2,ICAM1,HELLS,CD93,ADAM17,STXBP3,EPHB2,ADAM10,DOCK11,CD44,PHB,ATP7A,JAG2,CXADR,STOML2,AXL,PRKCD,HLA-A	-1.51535	-0.40641	21	105
POSITIVE REGULATION OF PROTEIN LOCALIZATION TO PLASMA MEMBRANE%GOBP%GO:1903078	POSITIVE REGULATION OF PROTEIN LOCALIZATION TO PLASMA MEMBRANE%GOBP%GO:1903078	0.00710391	0.0487463	-1	AKAP5,EPHB2,STX3,ARHGEF16,LRP1,DLG1,CNST,ACSL3,ATP2B4,RHOG,CIB1,ARF6,ZDHHC5,STX4,ATP2C1	-1.65739	-0.5537	15	31
PURINE-CONTAINING COMPOUND CATABOLIC PROCESS%GOBP%GO:0072523	PURINE-CONTAINING COMPOUND CATABOLIC PROCESS%GOBP%GO:0072523	0.00713056	0.0488437	1	NUDT16,ENTPD4,NT5C2,PDE4D,NUDT11,ENPP4,NUDT1,NUDT15,ADAL,NUDT3,NUDT4	1.71041	0.565622	11	23
PROTEASOMAL PROTEIN CATABOLIC PROCESS%GOBP%GO:0010498	PROTEASOMAL PROTEIN CATABOLIC PROCESS%GOBP%GO:0010498	0.00718209	0.049111	1	ASB2,FBXL22,KCTD5,CDC34,HECW2,RNF41,SIAH1,PSME4,ASCC2,TRIP4,SIRT2,UBE2S,SIAH2,UBE2D3,ZNF598,FEM1B,ZSWIM8,SMURF2,ARRB1,KLHL22,DNAJB12,UBE2G1,ASCC3,WWP2,ITCH,FBXL7,ZFAND2B,BAG6,AGAP3,PSMA5,KIF14,VCP,FBXL4,ANAPC5,UBXN1,DDB1,PSMB6,NPLOC4,EDEM2,UBR3,PSMD4,CUL2,PSMA1,ANAPC7,CUL3,UBE2K,UCHL1,PSMA7,RMND5A,ATXN3,UBXN6,NSFL1C,PSMB3,PSMB4,USP19,KCTD10,USP13,PCBP2,PLAA,ANAPC1	1.37653	0.306396	60	199
DEPHOSPHORYLATION%GOBP%GO:0016311	DEPHOSPHORYLATION%GOBP%GO:0016311	0.00725115	0.049497	1	EYA4,MTMR8,MTMR3,PPP2R3B,PHPT1,DUSP3,PTEN,PTPN11,PGP,SYNJ2,ILKAP,PPP2R5E,CTTNBP2NL,PPM1B,PPP2R1A,RPAP2,PPP2R5A,PTPN21,INPP5F,TIMM50,THTPA,MTMR6,PPP2R2D,PSPH,PPP3CB,SSH1,PPP2R3A,MTMR9,DUSP12,PDP1,PPP5C,PPM1A,NT5C,PTPN12,IMPA1	1.50754	0.363724	35	108
SYNAPTIC SIGNALING%GOBP%GO:0099536	SYNAPTIC SIGNALING%GOBP%GO:0099536	0.00734322	0.0500384	-1	MPP2,CACNB2,STXBP2,AKAP5,STXBP1,LIN7C,GNAQ,STXBP3,STX1B,STX3,AGRN,CNP,CACNB3,DLG1,GNB1,PCDHB14,SLC32A1,PIP5K1C,PDZD11,DTNA,STX2,SNAP25	-1.53955	-0.421145	22	92
REGULATION OF SODIUM ION TRANSPORT%GOBP%GO:0002028	REGULATION OF SODIUM ION TRANSPORT%GOBP%GO:0002028	0.00736471	0.0500979	-1	AHCYL1,ATP1A2,TESC,ATP1B1,ATP1A1,SLC9A1,ATP1B2,FXYD1,FGF13,SLC9A3R1,DLG1,ANK3,P2RX4,NKX2-5,WNK2,ATP1B3	-1.65416	-0.524219	16	39
CELL-CELL JUNCTION ASSEMBLY%GOBP%GO:0007043	CELL-CELL JUNCTION ASSEMBLY%GOBP%GO:0007043	0.00741793	0.0503726	-1	MARVELD2,POF1B,EPB41L3,OCLN,JUP,RAB13,CD9,TJP1,CLDN6,DLG1,CTNNA1,PKP3,PIP5K1C,MPP7,CTNNB1,RHOA,JAM3,PKP4,CNTNAP1,ARVCF,LSR,MPDZ,ACTB,CTNND1,PKP2	-1.62498	-0.491651	25	50
ESTABLISHMENT OF ENDOTHELIAL BARRIER%GOBP%GO:0061028	ESTABLISHMENT OF ENDOTHELIAL BARRIER%GOBP%GO:0061028	0.00748936	0.0507699	-1	MARVELD2,F11R,ICAM1,TJP1,RAP2C,RAP1B,RDX,RAP1A,RAPGEF6,RAP2B	-1.69892	-0.632019	10	19
REGULATION OF PHOSPHATIDYLINOSITOL 3-KINASE SIGNALING%GOBP%GO:0014066	REGULATION OF PHOSPHATIDYLINOSITOL 3-KINASE SIGNALING%GOBP%GO:0014066	0.00765722	0.0518182	-1	PTPN13,SLC9A3R1,DCN,ROR2,FN1,MYDGF,PIP5K1A,PIP5K1C,SEMA4D,PDGFB,ERBB3,MAZ,PDGFC,FGF2,SRC,AGT	-1.65285	-0.530653	16	37
IMMUNOREGULATORY INTERACTIONS BETWEEN A LYMPHOID AND A NON-LYMPHOID CELL%REACTOME%R-HSA-198933.7	IMMUNOREGULATORY INTERACTIONS BETWEEN A LYMPHOID AND A NON-LYMPHOID CELL%REACTOME%R-HSA-198933.7	0.00777202	0.0525046	-1	CD99,ICAM1,ICAM5,CDH1,CXADR,HLA-C,HLA-A,NCR3LG1,COLEC12,B2M	-1.71186	-0.661519	10	16
REGULATION OF PROTEIN LOCALIZATION TO PLASMA MEMBRANE%GOBP%GO:1903076	REGULATION OF PROTEIN LOCALIZATION TO PLASMA MEMBRANE%GOBP%GO:1903076	0.00779059	0.0525396	-1	VAMP8,AKAP5,EPHB2,STX3,ARHGEF16,LRP1,AP2M1,DLG1,CNST,ACSL3,MMP14,GBP1,ATP2B4,RHOQ,LDLRAP1,RHOG,CIB1,ARF6,ZDHHC5,STX4,ATP2C1,INS,ACTB,NUMB,TGFB1	-1.60798	-0.475995	25	57
PROTEIN K48-LINKED UBIQUITINATION%GOBP%GO:0070936	PROTEIN K48-LINKED UBIQUITINATION%GOBP%GO:0070936	0.00796301	0.0535724	1	UBE2H,CDC34,RNF115,UBE2D3,UBE2G1,UBE2D1,ITCH,ARIH2,UBE2E1	1.6325	0.497458	9	33
VIRAL MESSENGER RNA SYNTHESIS%REACTOME%R-HSA-168325.4	VIRAL MESSENGER RNA SYNTHESIS%REACTOME%R-HSA-168325.4	0.00798306	0.0535724	-1	NUP85,AAAS,TPR,NUP35,NUP62,NUP153,NUP54,POLR2I,POLR2D,NUP50,NUP155,RANBP2,RAE1,NUP88,NUP160,NUP210,NUP107,NDC1	-1.64912	-0.529453	18	37
REGULATED EXOCYTOSIS%GOBP%GO:0045055	REGULATED EXOCYTOSIS%GOBP%GO:0045055	0.00798467	0.0535724	-1	VAMP8,STXBP2,STXBP1,RAB11FIP1,STXBP3,STX1B,STX3,SDF4,LYN,PIP5K1C,STX2,SNAP25,TMED10,RAB10,VAMP7,SNAP23,STX4,PCLO,SYT7	-1.63268	-0.510675	19	42
AGING%GOBP%GO:0007568	AGING%GOBP%GO:0007568	0.00803783	0.0537821	-1	CHEK2,HMGA1,LOXL2,HRAS,CISD2,PRKCD,PML,PDCD4,SMC6,SERPINE1,CDKN1B,NSMCE2,PSEN1,SMC5,TP53,B2M,COQ7,SIRT1,WRN,TERF2,MORC3,CALR,MSH6,KAT6A	-1.60973	-0.483216	24	53
CELLULAR MONOVALENT INORGANIC CATION HOMEOSTASIS%GOBP%GO:0030004	CELLULAR MONOVALENT INORGANIC CATION HOMEOSTASIS%GOBP%GO:0030004	0.00804334	0.0537821	-1	ATP1A2,ATP1B1,ATP1A1,SLC4A8,SLC9A1,ATP1B2,SLC4A7,TCIRG1	-1.64027	-0.530068	8	36
POSITIVE REGULATION OF PHOSPHATIDYLINOSITOL 3-KINASE SIGNALING%GOBP%GO:0014068	POSITIVE REGULATION OF PHOSPHATIDYLINOSITOL 3-KINASE SIGNALING%GOBP%GO:0014068	0.00813683	0.0543147	-1	DCN,ROR2,FN1,MYDGF,SEMA4D,PDGFB,ERBB3,MAZ,PDGFC,FGF2,SRC,AGT,INS,SIRT1	-1.65122	-0.56244	14	28
MUSCLE CONTRACTION%GOBP%GO:0006936	MUSCLE CONTRACTION%GOBP%GO:0006936	0.00818235	0.0545258	-1	MYH6,ASPH,ATP1A2,CACNB2,ATP1B1,ATP1A1,FXYD1,TMOD1,MYH8,TCAP,MYOF,MYH3,PIK3C2A,DTNA,MYOM1,TMOD3,CACNA1C,MYBPC3,TTN,KCNJ8,MYL6B,ATP2B4,KCNQ1,MYOM2,DES,CACNA2D1,HRC,UTRN,MYL3,MYL4,MYH2,TNNC1,PABPN1	-1.51719	-0.413484	33	94
LEUKOCYTE MIGRATION%GOBP%GO:0050900	LEUKOCYTE MIGRATION%GOBP%GO:0050900	0.00822785	0.0547361	-1	ADD2,CD99,YES1,F11R,ICAM1,BSG,SIRPA,LYN,P2RX4,CXADR,PIP5K1C,PDGFB,S1PR1	-1.6127	-0.492988	13	47
REGULATION OF PROTEIN MODIFICATION BY SMALL PROTEIN CONJUGATION OR REMOVAL%GOBP%GO:1903320	REGULATION OF PROTEIN MODIFICATION BY SMALL PROTEIN CONJUGATION OR REMOVAL%GOBP%GO:1903320	0.00826162	0.0548599	1	PTTG1IP,PIN1,NXN,COMMD1,UBE2N,PARK7,RCHY1,DCUN1D2,PTEN,EGR1,UBE2S,PRICKLE1,PDCD6,TRAF6,ARRB1,SQSTM1,UBE2D1,HSP90AA1,AMER1,PEF1,RPS2,RPL23,ITCH,OTUB1,RPL11,VCP,OGT,DNAJA1,UBXN1,ISG15,HSPBP1,USP4,FKBP1A,VPS28,HSP90AB1,RPS7,CUL3,XIAP,PPIA,ZC3H12A,GNL3L,PLAA,BAG2,HUWE1,DCUN1D4,RPS3	1.46841	0.347826	46	122
RESPONSE TO HYPOXIA%GOBP%GO:0001666	RESPONSE TO HYPOXIA%GOBP%GO:0001666	0.00827441	0.0548599	-1	PLOD2,BMP7,ITPR1,AK4,ADAM17,LOXL2,PDK3,NDRG1,MMP2,SFRP1,ALKBH5,PLOD1,ANGPTL4,ARNT,FABP1,BNIP3,PML,THBS1,PDK1,TBL2,HSP90B1,RBPJ,LONP1,FAM162A,CAV1,HMOX2,AQP1,EP300,TP53,SIRT1,PGK1,RYR2	-1.55329	-0.440437	32	73
REGULATION OF IMMUNE SYSTEM PROCESS%GOBP%GO:0002682	REGULATION OF IMMUNE SYSTEM PROCESS%GOBP%GO:0002682	0.00833135	0.0549265	-1	GGT3P,MOSPD2,MTUS1,CADM1,THY1,VAMP8,SERPINB9,CD99,TESC,CLU,BTN2A1,STXBP2,YES1,LOXL3,ICAM1,COLEC11,ANO6,LGALS1,IFI16,FBN1,FLOT2,MFHAS1,ADAM17,EPHB2,SLC39A10,ADAM10,APOA1,MPP1,CD55,PHB,SIRPA,ST3GAL4,LYN,P2RX4,SFRP1,TRIM25,BST2,LYAR,PAK1,MMP14,NOD1,EMILIN1,SHPK,ARNT,DDX58,TRAF3IP1,STOML2,CD59,FLOT1,TP53BP1,MAD2L2,FURIN,AXL,GBP1,STK10,PRKCD,HLA-A,THBS1,TARBP2,PQBP1,A2M,IGF2,ELMOD2,THOC1,RHOA,ZNF335,S…	-1.33096	-0.31201	90	380
NEUROTRANSMITTER RECEPTORS AND POSTSYNAPTIC SIGNAL TRANSMISSION%REACTOME%R-HSA-112314.8	NEUROTRANSMITTER RECEPTORS AND POSTSYNAPTIC SIGNAL TRANSMISSION%REACTOME%R-HSA-112314.8	0.00833712	0.0549265	-1	GNG5,NRAS,EPB41L1,AKAP5,GNB4,LIN7C,ADCY9,GNAI3,DLG1,GNB1,GNAI2,HRAS,GNB2,MYO6,CAMK2B,GABBR1,NPTN	-1.56753	-0.44939	17	68
TIGHT JUNCTION ORGANIZATION%GOBP%GO:0120193	TIGHT JUNCTION ORGANIZATION%GOBP%GO:0120193	0.00834043	0.0549265	-1	MARVELD2,POF1B,OCLN,RAB13,CLDN6,DLG1	-1.68553	-0.627038	6	19
TIGHT JUNCTION ASSEMBLY%GOBP%GO:0120192	TIGHT JUNCTION ASSEMBLY%GOBP%GO:0120192	0.00834043	0.0549265	-1	MARVELD2,POF1B,OCLN,RAB13,CLDN6,DLG1	-1.68553	-0.627038	6	19
RESPONSE TO ACID CHEMICAL%GOBP%GO:0001101	RESPONSE TO ACID CHEMICAL%GOBP%GO:0001101	0.00836614	0.0550035	1	PIK3CA,RRAGC,KLHL22,CAPN2,IPO5,LAMTOR3,RPTOR,LAMTOR1,CPEB4,MTOR,FYN,UBR1,UBR2	1.69817	0.569679	13	22
SENSORY SYSTEM DEVELOPMENT%GOBP%GO:0048880	SENSORY SYSTEM DEVELOPMENT%GOBP%GO:0048880	0.00841365	0.0550393	-1	COL4A1,THY1,FBN2,FBN1,LAMA1,COL5A1,MFAP2,PITX3,KDM2B,STRA6,PBX3,NRP1,HDAC1,CACNA1C,SDK2	-1.57545	-0.454958	15	65
EYE DEVELOPMENT%GOBP%GO:0001654	EYE DEVELOPMENT%GOBP%GO:0001654	0.00841365	0.0550393	-1	COL4A1,THY1,FBN2,FBN1,LAMA1,COL5A1,MFAP2,PITX3,KDM2B,STRA6,PBX3,NRP1,HDAC1,CACNA1C,SDK2	-1.57545	-0.454958	15	65
VISUAL SYSTEM DEVELOPMENT%GOBP%GO:0150063	VISUAL SYSTEM DEVELOPMENT%GOBP%GO:0150063	0.00841365	0.0550393	-1	COL4A1,THY1,FBN2,FBN1,LAMA1,COL5A1,MFAP2,PITX3,KDM2B,STRA6,PBX3,NRP1,HDAC1,CACNA1C,SDK2	-1.57545	-0.454958	15	65
AUTOPHAGOSOME ORGANIZATION%GOBP%GO:1905037	AUTOPHAGOSOME ORGANIZATION%GOBP%GO:1905037	0.00855615	0.055832	1	MAP1LC3B,ATG101,ATP13A2,MFN2,RB1CC1,ATG5,WIPI1,ATG16L1,WDR45,ATG14,ATG7,ATG9A,GABARAPL2,NSFL1C,TRAPPC8,ATG12,ATP2A2,EMC6	1.60844	0.464957	18	42
REGULATION OF CARDIAC MUSCLE CONTRACTION%GOBP%GO:0055117	REGULATION OF CARDIAC MUSCLE CONTRACTION%GOBP%GO:0055117	0.00856327	0.055832	-1	DSG2,STC1,BMP10,ATP1A2,DSC2,ATP1B1,SLC9A1,DSP,CTNNA3,JUP,FGF13,DLG1,P2RX4,NKX2-5,CACNA1C	-1.62709	-0.502076	15	45
CELLULAR RESPONSES TO STRESS%REACTOME%R-HSA-2262752.8	CELLULAR RESPONSES TO STRESS%REACTOME%R-HSA-2262752.8	0.0086072	0.0559983	1	RPS4Y1,DNAJC7,ACADVL,HSPA8,HSPH1,TLN1,PSME4,RPL37,COX16,RPS29,MAPKAPK2,CEBPG,GOSR2,RRAGC,SEC31A,RPS10,SURF1,AGO4,CAMK2D,UBE2S,ERF,UBE2D3,RRAGA,RPS14,RPL36AL,TNIK,PSMF1,RPS18,RPS16,LRPPRC,RPLP1,HIF1AN,RPS28,RPL36,DYNC1H1,UBE2D1,ACTR10,ATF3,RPL27,EIF2S2,HSP90AA1,RPL36A,CDK4,RPS19,RPS2,EIF2S1,RPL23,RPS20,RPL19,NR3C1,ASF1A,PRDX2,DCTN5,TPP1,LAMTOR3,RPS5,PSMD9,HDGF,PSME3,WIPI1,HSPA14,RPL17,RPL10A,RPL11…	1.22953	0.251111	149	487
PROTEASOME-MEDIATED UBIQUITIN-DEPENDENT PROTEIN CATABOLIC PROCESS%GOBP%GO:0043161	PROTEASOME-MEDIATED UBIQUITIN-DEPENDENT PROTEIN CATABOLIC PROCESS%GOBP%GO:0043161	0.00861731	0.0559983	1	ASB2,FBXL22,KCTD5,CDC34,HECW2,SIAH1,ASCC2,TRIP4,SIRT2,UBE2S,SIAH2,UBE2D3,ZNF598,FEM1B,ZSWIM8,SMURF2,ARRB1,KLHL22,DNAJB12,UBE2G1,ASCC3,WWP2,ITCH,FBXL7,ZFAND2B,BAG6,AGAP3,KIF14,VCP,FBXL4,ANAPC5,UBXN1,DDB1,NPLOC4,EDEM2,UBR3,PSMD4,CUL2,ANAPC7,CUL3,UBE2K,UCHL1,RMND5A,ATXN3,NSFL1C,USP19,KCTD10,PCBP2,PLAA,ANAPC1,HUWE1,ANAPC4,FAF1,FBXL8,DERL1,AMN1	1.36963	0.309793	56	171
REGULATION OF CELLULAR RESPONSE TO GROWTH FACTOR STIMULUS%GOBP%GO:0090287	REGULATION OF CELLULAR RESPONSE TO GROWTH FACTOR STIMULUS%GOBP%GO:0090287	0.00870931	0.0563094	-1	GPC1,FBN2,FOLR1,ENG,SHISA2,PRDM16,FBN1,ADAMTS3,PEG10,ADAM17,CD109,MYO1C,GREM2,SPRY3,DCN,BMPER,NUMA1,SPRY1,SNX25,VASN,EMILIN1,VTN,ARNT,LTBP4,STK11,THBS1,CHRD,NPTN,ATP2B4,ING2,PCSK6,NOG,FGF2,RBPJ,ADAMTS12,SDCBP,CAV1,AGT,SNW1	-1.48436	-0.393679	39	114
EXOCYTIC PROCESS%GOBP%GO:0140029	EXOCYTIC PROCESS%GOBP%GO:0140029	0.00874155	0.0563094	-1	STXBP2,STXBP1,STXBP3,STX1B,STX3,RAB13,STX2,SNAP25,RAB8B,RAB10,SNAP23,STX4,RAB8A	-1.64751	-0.556497	13	29
SULFUR COMPOUND BIOSYNTHETIC PROCESS%GOBP%GO:0044272	SULFUR COMPOUND BIOSYNTHETIC PROCESS%GOBP%GO:0044272	0.00874284	0.0563094	-1	GGT3P,CHST6,CHST14,CHSY1,LIAS,MAT1A,ST3GAL4,HSD17B12,ACSL3,UGDH,PAPSS2,B4GAT1,CHST12,HACD2,PDHX,METTL16,ST3GAL1,ACSL4,PPT1,HACD1,SLC25A1,PAPSS1,ACSF3,CHST11,ADI1,CTH,TECR,GLCE,CHPF,B3GNT2,ST3GAL2,ACSL1,CHST7	-1.5564	-0.443103	33	71
HALLMARK_ESTROGEN_RESPONSE_LATE%MSIGDB_C2%HALLMARK_ESTROGEN_RESPONSE_LATE	HALLMARK_ESTROGEN_RESPONSE_LATE%MSIGDB_C2%HALLMARK_ESTROGEN_RESPONSE_LATE	0.00874416	0.0563094	-1	LAMC2,ADD3,SLC9A3R1,WFS1,LLGL2,MYOF,CD44,FKBP5,PKP3,UGDH,PRSS23,FARP1,DHCR7,SERPINA1,AFF1,PAPSS2,ATP2B4,SLC1A4,TFPI2,JAK1,GLA,HSPA4L,CACNA2D2,FLNB,PDZK1,TNNC1,CELSR2,LSR,TOP2A,SEMA3B,ABCA3	-1.54561	-0.437687	31	74
RUNX1 REGULATES TRANSCRIPTION OF GENES INVOLVED IN DIFFERENTIATION OF HSCS%REACTOME%R-HSA-8939236.1	RUNX1 REGULATES TRANSCRIPTION OF GENES INVOLVED IN DIFFERENTIATION OF HSCS%REACTOME%R-HSA-8939236.1	0.00874795	0.0563094	1	PSME4,CBFB,PSMF1,ITCH,PSMD9,PSME3,PSMD5,PSMA5,PSMB6,PSMD4,PSMA1,PSMA7,PSMB3,PSMB4,UBA52,LDB1,PSMA6,PSMD11	1.59583	0.441352	18	51
POSITIVE REGULATION OF PROTEIN CATABOLIC PROCESS%GOBP%GO:0045732	POSITIVE REGULATION OF PROTEIN CATABOLIC PROCESS%GOBP%GO:0045732	0.00875126	0.0563094	1	RILP,PTTG1IP,HECW2,RNF41,VPS35,RNF14,RCHY1,PTEN,NUB1,SIRT2,PRICKLE1,SMURF2,HSP90AA1,AMER1,HECTD1,GBA,APC,WWP2,SH3D19,ARIH1,ITCH,BAG6,USP5,ARIH2,FOXO1,VCP,ATG7,DDB1,ZYG11B,CCDC22,GSK3B,HSPBP1,KEAP1,VPS28,ATXN3,IDE,USP13,BAG2,SEC22B,DACT1,HUWE1	1.45785	0.348175	41	116
CARDIAC SEPTUM MORPHOGENESIS%GOBP%GO:0060411	CARDIAC SEPTUM MORPHOGENESIS%GOBP%GO:0060411	0.00880106	0.0565013	-1	ENG,BMP7,NRP2,HEY2,NRP1,NKX2-5,SEMA3C,ROBO2,NOG,TGFBR1	-1.64328	-0.559735	10	28
MESENCHYMAL CELL DIFFERENTIATION%GOBP%GO:0048762	MESENCHYMAL CELL DIFFERENTIATION%GOBP%GO:0048762	0.00880989	0.0565013	-1	LOXL3,FOLR1,ENG,BMP7,LOXL2,HEY2,TCOF1,FN1,SEMA4B,SPRY1,NRP1,SEMA4D,HAND2,SEMA3C,NOLC1,TAPT1,SEMA4C,CTNNB1,RADIL,PDCD4,NOG,RBPJ	-1.58019	-0.460285	22	62
POSITIVE REGULATION OF PROTEIN-CONTAINING COMPLEX DISASSEMBLY%GOBP%GO:0043243	POSITIVE REGULATION OF PROTEIN-CONTAINING COMPLEX DISASSEMBLY%GOBP%GO:0043243	0.0088411	0.056609	1	CFL2,KATNB1,SEMA5A,WDR1,NES,SETX,GBA,STMN2,ACTN2,FYCO1	1.69706	0.610485	10	17
MRNA-CONTAINING RIBONUCLEOPROTEIN COMPLEX EXPORT FROM NUCLEUS%GOBP%GO:0071427	MRNA-CONTAINING RIBONUCLEOPROTEIN COMPLEX EXPORT FROM NUCLEUS%GOBP%GO:0071427	0.00890302	0.0568201	-1	NUP85,THOC2,ALKBH5,TPR,THOC1,POLR2D,THOC6,ENY2,ZC3H11A,PABPN1,NUP88,SMG1,SARNP,THOC5,NUP160,PCID2,NCBP1,GLE1,NUP107,DDX39A,RBM15B,AGFG1,YTHDC1,NUP214,NUP133	-1.61995	-0.502054	25	44
MRNA EXPORT FROM NUCLEUS%GOBP%GO:0006406	MRNA EXPORT FROM NUCLEUS%GOBP%GO:0006406	0.00890302	0.0568201	-1	NUP85,THOC2,ALKBH5,TPR,THOC1,POLR2D,THOC6,ENY2,ZC3H11A,PABPN1,NUP88,SMG1,SARNP,THOC5,NUP160,PCID2,NCBP1,GLE1,NUP107,DDX39A,RBM15B,AGFG1,YTHDC1,NUP214,NUP133	-1.61995	-0.502054	25	44
CARDIAC MUSCLE TISSUE MORPHOGENESIS%GOBP%GO:0055008	CARDIAC MUSCLE TISSUE MORPHOGENESIS%GOBP%GO:0055008	0.00898252	0.0572344	-1	MYH6,BMP10,DSP,ENG,TCAP,NKX2-5,S1PR1,MYBPC3,TTN,NOG,RBPJ,MYL3,TGFBR1,TNNC1,PKP2,TBX20,MYH7,TGFB1,RYR2,TPM1	-1.63787	-0.53388	20	34
HEART MORPHOGENESIS%GOBP%GO:0003007	HEART MORPHOGENESIS%GOBP%GO:0003007	0.0090009	0.0572586	-1	MYH6,BMP10,DSP,FOLR1,ENG,BMP7,NRP2,TCAP,HEY2,SPRY1,NRP1,HAND2,NKX2-5,S1PR1,SEMA3C,MYBPC3,TTN,PDCD4,ROBO2,NOG,RBPJ,MYL3,TGFBR1,TNNC1,PKP2,TBX20,MYH7,TGFB1,RYR2,TPM1,BMP5	-1.54426	-0.43547	31	76
PID_LYSOPHOSPHOLIPID_PATHWAY%MSIGDB_C2%PID_LYSOPHOSPHOLIPID_PATHWAY	PID_LYSOPHOSPHOLIPID_PATHWAY%MSIGDB_C2%PID_LYSOPHOSPHOLIPID_PATHWAY	0.0090864	0.0575871	-1	GNAZ,GNAQ,ADCY9,GNAI3,GNB1,LYN,MMP2,HRAS,JUN,GNA14,RAC1,GNA11,SRC,GNA13,GNAI1	-1.63304	-0.545564	15	31
ALPHA ADRENERGIC RECEPTOR SIGNALING PATHWAY%PANTHER PATHWAY%P00002	ALPHA ADRENERGIC RECEPTOR SIGNALING PATHWAY%PANTHER PATHWAY%P00002	0.0090864	0.0575871	-1	ADRA2B,ADRA2B,ITPR1,ITPR1,ITPR1,SNAP25,SNAP25,PRKCD,PRKCD,GNA11,GNA11,SNAP23	-1.63108	-0.544908	12	31
PHOSPHATIDIC ACID METABOLIC PROCESS%GOBP%GO:0046473	PHOSPHATIDIC ACID METABOLIC PROCESS%GOBP%GO:0046473	0.00911123	0.0575871	-1	LIPH,LPCAT4,PLD1,AGPAT2,LPCAT1,AGPAT4,LCLAT1,ACP6	-1.67841	-0.640313	8	17
PHOSPHATIDIC ACID BIOSYNTHETIC PROCESS%GOBP%GO:0006654	PHOSPHATIDIC ACID BIOSYNTHETIC PROCESS%GOBP%GO:0006654	0.00911123	0.0575871	-1	LIPH,LPCAT4,PLD1,AGPAT2,LPCAT1,AGPAT4,LCLAT1,ACP6	-1.67841	-0.640313	8	17
TISSUE HOMEOSTASIS%GOBP%GO:0001894	TISSUE HOMEOSTASIS%GOBP%GO:0001894	0.0092504	0.0583727	-1	LAMA2,LAMC1,F11R,OCLN,ATP1B2,RCN3,SLC2A1,TJP1,P2RX4,CXADR	-1.62948	-0.513406	10	40
MITOCHONDRIAL TRANSPORT%GOBP%GO:0006839	MITOCHONDRIAL TRANSPORT%GOBP%GO:0006839	0.00926539	0.0583734	1	TIMM17A,VPS35,ALKBH7,MFN2,ABCB10,RHOT2,SLC25A20,CHCHD4,TIMM8B,TIMM13,HSP90AA1,TOMM34,BCL2L1,SLC25A16,SPG7,MICU2,MOAP1,TIMM50,CPT1B,BAD,TOMM7,SLC25A12,GSK3B,TIMM23,MRS2,MIPEP,SLC35F6,SLC25A5,SFXN4,MRPL18,TOMM22,MFF,SLC25A29,TIMM17B,TOMM40,SLC25A4,ZNF205,TIMM44,NMT1,DNLZ,TIMM10B,FIS1,CHCHD10,VDAC2,ROMO1,HEBP2,SAMM50,BCS1L,SFXN2	1.47067	0.354353	49	109
HS-GAG BIOSYNTHESIS%REACTOME%R-HSA-2022928.1	HS-GAG BIOSYNTHESIS%REACTOME%R-HSA-2022928.1	0.00928314	0.0583915	-1	HSPG2,GPC1,AGRN,HS3ST3B1,SDC3,HS3ST1,GPC3,GPC4,GPC2,SDC4,EXT2,GLCE	-1.67678	-0.63969	12	17
PROTEIN N-LINKED GLYCOSYLATION VIA ASPARAGINE%GOBP%GO:0018279	PROTEIN N-LINKED GLYCOSYLATION VIA ASPARAGINE%GOBP%GO:0018279	0.0093617	0.0587915	-1	MGAT1,NUDT14,FUT8,UGGT2,ALG5,UGGT1,MGAT5	-1.66836	-0.620648	7	19
REGULATION OF RUNX3 EXPRESSION AND ACTIVITY%REACTOME%R-HSA-8941858.1	REGULATION OF RUNX3 EXPRESSION AND ACTIVITY%REACTOME%R-HSA-8941858.1	0.00950312	0.0595843	1	CBFB,SMURF2,PSMF1,PSMD9,PSME3,PSMD5,PSMA5,PSMB6,PSMD4,PSMA1,PSMA7,PSMB3,PSMB4,UBA52	1.60628	0.454212	14	46
CLASS I PI3K SIGNALING EVENTS MEDIATED BY AKT%PATHWAY INTERACTION DATABASE NCI-NATURE CURATED DATA%CLASS I PI3K SIGNALING EVENTS MEDIATED BY AKT	CLASS I PI3K SIGNALING EVENTS MEDIATED BY AKT%PATHWAY INTERACTION DATABASE NCI-NATURE CURATED DATA%CLASS I PI3K SIGNALING EVENTS MEDIATED BY AKT	0.00962269	0.0601428	1	TBC1D4,KPNA1,HSP90AA1,YWHAB,CASP9,RAF1,BCL2L1,FOXO1,BAD,GSK3B,MTOR,RICTOR,AKT3,FOXO3,YWHAE,PRKACA	1.63786	0.505765	16	31
BEHAVIOR%GOBP%GO:0007610	BEHAVIOR%GOBP%GO:0007610	0.00964582	0.0601428	-1	TRH,SLC6A4,ATP1A2,GATM,ATP1B2,FGF13,EPHB2,GDF15,ATP7A,P2RX4,STRA6	-1.52186	-0.430044	11	75
CELL CYCLE%PANTHER PATHWAY%P00013	CELL CYCLE%PANTHER PATHWAY%P00013	0.00964712	0.0601428	1	CCND2,PSME3,PSME3,EIF3F,PSMD4,PSMD4,CCNE1,CCNE1,CCNE1,PSMD11,PSMD11,CCND1,CCND1,CCNB1,RPA3	1.65126	0.519533	15	29
RHOF GTPASE CYCLE%REACTOME%R-HSA-9035034.2	RHOF GTPASE CYCLE%REACTOME%R-HSA-9035034.2	0.00966738	0.0601428	-1	BAIAP2L1,ADD3,SLC4A7,AKAP12,FAM169A,TOR1AIP1,FARP1,DIAPH3,CAV1,SNAP23,MTMR1,SENP1,ACTB,BASP1,ARHGAP39,DIAPH2,TMPO	-1.62826	-0.527478	17	35
DEGRADATION OF BETA-CATENIN BY THE DESTRUCTION COMPLEX%REACTOME DATABASE ID RELEASE 77%195253	DEGRADATION OF BETA-CATENIN BY THE DESTRUCTION COMPLEX%REACTOME DATABASE ID RELEASE 77%195253	0.00968109	0.0601428	1	PSME4,PSMF1,PPP2R5E,PPP2R1A,AMER1,APC,PPP2R5A,PSMD9,PSME3,PSMD5,PSMA5,PSMB6,GSK3B,PSMD4,PSMA1,PSMA7,PSMB3,PSMB4,UBA52	1.54868	0.410762	19	63
TRANS-SYNAPTIC SIGNALING%GOBP%GO:0099537	TRANS-SYNAPTIC SIGNALING%GOBP%GO:0099537	0.00968415	0.0601428	-1	MPP2,CACNB2,STXBP2,AKAP5,STXBP1,LIN7C,STXBP3,STX1B,STX3,CNP,CACNB3,DLG1,PCDHB14,SLC32A1,PIP5K1C,PDZD11,DTNA,STX2,SNAP25	-1.52995	-0.426046	19	82
POSITIVE REGULATION OF DEVELOPMENTAL PROCESS%GOBP%GO:0051094	POSITIVE REGULATION OF DEVELOPMENTAL PROCESS%GOBP%GO:0051094	0.00970299	0.0601647	-1	XKR8,ADRA2B,BMP10,METRN,TESC,ATP2B1,GPC1,ARG2,FBN2,F11R,HK2,ENG,ANO6,LGALS1,ADD1,JUP,EHD2,BMP7,HMGA1,EPHB2,LOXL2,AGRN,ZNF385A,APOA1,SRPX2,TJP1,METRNL,DCN,COL1A1,MYDGF,BMPER,NUMA1,NPNT,ATP11A,SFRP1,SP1,NRP1,ANGPTL4,MMP14,SEMA4D,CCDC71L,NKX2-5,BMP1,PLXND1,PDGFB,ARNT,FLOT1,TP53BP1,MAD2L2,SERPINE2,TAPT1,AXL,LRRC4B,CAMK2B,BNIP3,PPP1R13L,CTNNB1,MTDH,PAK4,THBS1,ECM1,NPTN,FGG,NUMBL,RALBP1,HNRNPU,HOXB4,RH…	-1.31297	-0.307015	98	394
MESENCHYME DEVELOPMENT%GOBP%GO:0060485	MESENCHYME DEVELOPMENT%GOBP%GO:0060485	0.00973783	0.0602854	-1	LOXL3,FOLR1,ENG,BMP7,LOXL2,HEY2,TCOF1,FN1,SEMA4B,SPRY1,NRP1,WNT11,SEMA4D,HAND2,SEMA3C,NOLC1,TAPT1,SEMA4C,CTNNB1,RADIL,PDCD4,CRELD1,ROBO2,NOG,RBPJ,TGFBR1,BASP1,SEMA3B,TBX20,FAM172A,S100A4,CDH2,TGFB1,BMP5	-1.53246	-0.431084	34	77
HETEROCYCLE CATABOLIC PROCESS%GOBP%GO:0046700	HETEROCYCLE CATABOLIC PROCESS%GOBP%GO:0046700	0.00984252	0.0608376	1	CRMP1,PABPC4,CSDE1,SAMD4A,CTIF,DPYSL4,NUDT16,ENTPD4,RNH1,DPYSL3,EIF3E,AGO4,YTHDF2,NT5C2,DCTPP1,PDE4D,DDX5,LSM1,ZPR1,APEX1,NUDT5,GSPT1,NUDT11,TET2,DXO,ENPP4,TTC37,RC3H1,NUDT1,SMG9,UPF1,NUDT15,CNOT10,VCP,DIS3L2,CNOT7,BLVRB,DPYSL5,ADAL,SND1,SMG6,NT5C,EXOG,EDC3,NUDT3,SETMAR,EXOSC8,PATL1,CNOT2,NUDT4,ZC3H12A,DNASE2,UPF2,ZFP36L1,UPF3B,SKIV2L,ITPA,CNOT1,SARM1	1.35084	0.304915	59	174
MAINTENANCE OF BLOOD-BRAIN BARRIER%GOBP%GO:0035633	MAINTENANCE OF BLOOD-BRAIN BARRIER%GOBP%GO:0035633	0.00992686	0.0611663	-1	LAMA2,LAMC1,F11R,OCLN,TJP1	-1.68723	-0.662429	5	15
PROTON TRANSMEMBRANE TRANSPORT%GOBP%GO:1902600	PROTON TRANSMEMBRANE TRANSPORT%GOBP%GO:1902600	0.00992686	0.0611663	-1	ATP1A2,ATP1A1,SLC9A1,STOML2	-1.68527	-0.66166	4	15
PROTEIN LOCALIZATION TO CELL JUNCTION%GOBP%GO:1902414	PROTEIN LOCALIZATION TO CELL JUNCTION%GOBP%GO:1902414	0.00998527	0.0614297	-1	F11R,DSP,STX1B,STX3,TJP1,DLG1,CGNL1,MPP7,KIF5C,JAK1,JAM3,RAB8A,PCLO,LSR,ACTB	-1.62384	-0.533753	15	33
TUBE MORPHOGENESIS%GOBP%GO:0035239	TUBE MORPHOGENESIS%GOBP%GO:0035239	0.0100996	0.0619022	-1	COL4A1,THY1,RECK,FOLR1,ENG,EGFL7,BMP7,LAMA1,EPHB2,LOXL2,LRP1,NRP2,PODXL,HEY2,BMPER,NPNT,NCL,KDM2B,STRA6,NRP1,WNT11,PAK1,TGFBI,NKX2-5,PLXND1,ADAMTS9,S1PR1,RNF213,SEMA4C,CTNNB1,THBS1,GPC3,RHOA,NOG,FGF2,ANGPTL2,RBPJ,JAM3,SERPINE1,AMOTL1,CAV1,TGFBR1	-1.42616	-0.364749	42	151
NERVOUS SYSTEM DEVELOPMENT%REACTOME DATABASE ID RELEASE 77%9675108	NERVOUS SYSTEM DEVELOPMENT%REACTOME DATABASE ID RELEASE 77%9675108	0.010101	0.0619022	1	RPS4Y1,CRMP1,ITGA9,ANK1,NTN1,CNTN1,PIK3R1,EPHA7,HSPA8,RELN,MYH11,SIAH1,PIK3CA,DPYSL4,TLN1,PSME4,RPL37,VASP,SEMA5A,MYL9,RPS29,EPHA2,CFL1,RPS10,DPYSL3,EIF4G1,SIAH2,PTPN11,SRGAP1,ZSWIM8,RPS14,RPL36AL,PSMF1,PFN1,PLXNA2,RPS18,RPS16,RPLP1,RPS28,RPL36,RPL27,HSP90AA1,RPL36A,RPS19,RPS2,PITPNA,ARPC1A,RPL23,NCK2,GSPT1,RPS20,RPL19,ARHGAP35,PABPC1,RPS5,EVL,PSMD9,PSME3,RPL17,RPL10A,RPL11,USP33,RPS11,PRKCA,MAPK…	1.26027	0.262997	132	363
SENSORY PERCEPTION OF MECHANICAL STIMULUS%GOBP%GO:0050954	SENSORY PERCEPTION OF MECHANICAL STIMULUS%GOBP%GO:0050954	0.0101094	0.0619022	-1	COL2A1,MARVELD2,COL11A2,WFS1,COL1A1,P2RX4,EPS8L2,KCNQ1,BIRC5	-1.62447	-0.557108	9	27
CAMERA-TYPE EYE DEVELOPMENT%GOBP%GO:0043010	CAMERA-TYPE EYE DEVELOPMENT%GOBP%GO:0043010	0.0101282	0.0619208	-1	COL4A1,THY1,FBN2,FBN1,LAMA1,PITX3,KDM2B,STRA6,NRP1,HDAC1,CACNA1C,SDK2	-1.61004	-0.494238	12	46
PID_HNF3A_PATHWAY%MSIGDB_C2%PID_HNF3A_PATHWAY	PID_HNF3A_PATHWAY%MSIGDB_C2%PID_HNF3A_PATHWAY	0.01019	0.0622017	-1	SP1,VTN,JUN,SERPINA1,POU2F1,NDUFV3,CDKN1B,INS,EP300,ATP5J	-1.6743	-0.647006	10	16
REGULATION OF LEUKOCYTE MEDIATED IMMUNITY%GOBP%GO:0002703	REGULATION OF LEUKOCYTE MEDIATED IMMUNITY%GOBP%GO:0002703	0.0102848	0.0626306	-1	CADM1,VAMP8,SERPINB9,STXBP2,ICAM1,CD55,LYN,BST2,DDX58,TP53BP1,MAD2L2,HLA-A,THOC1	-1.59483	-0.487525	13	47
CELLULAR RESPONSE TO EXTERNAL STIMULUS%GOBP%GO:0071496	CELLULAR RESPONSE TO EXTERNAL STIMULUS%GOBP%GO:0071496	0.0102922	0.0626306	1	GLRX2,MAP1LC3B,HABP4,HSPA8,MTMR3,CBS,TFEB,RRAGC,NUAK1,EIF4G1,ATG5,PDK2,DCTPP1,ANKRD1,EIF2S1,ZFYVE1,ARHGAP35,WIPI1,USP33,MAPK1,WDR45,FOXO1,RPTOR,NFKB1,NUDT1,PICK1,EIF2AK3,CLEC16A,NUDT15,ATG14,BMPR2,ATG7,BAD,CPEB4,MTOR,PIK3R4,DAP,XPR1,FAS,GABARAPL2,PRKD1	1.45581	0.349978	41	111
REGULATION OF ERK1 AND ERK2 CASCADE%GOBP%GO:0070372	REGULATION OF ERK1 AND ERK2 CASCADE%GOBP%GO:0070372	0.0103123	0.0626561	-1	ICAM1,ARHGEF5,MFHAS1,EPHB2,SLC9A3R1,SPRY3,CD44,DLG1,PHB,ROR2,FN1,SIRPA,BMPER,NPNT,SPRY1,LYN,NRP1,EMILIN1,HRAS,HAND2,PDGFB,WNK2,GBP1,FGG,PDGFC,TIMP3,RAP1A,CIB1,FGF2,GAS6,CD36	-1.50899	-0.415292	31	89
RESPONSE TO EXTRACELLULAR STIMULUS%GOBP%GO:0009991	RESPONSE TO EXTRACELLULAR STIMULUS%GOBP%GO:0009991	0.010361	0.0628204	1	GLRX2,MAP1LC3B,SLC27A4,HSPA8,MTMR3,CBS,TFEB,RRAGC,SIRT2,NUAK1,EIF4G1,ATG5,PDK2,DCTPP1,RPS19,EIF2S1,ZFYVE1,ARHGAP35,LARP1,WIPI1,USP33,MAPK1,WDR45,FOXO1,RPTOR,NUDT1,PICK1,EIF2AK3,CLEC16A,NUDT15,OGT,ATG14,BMPR2,ATG7,CPEB4,MTOR,PIK3R4,DAP,XPR1,FAS,GABARAPL2,PRKD1	1.4489	0.346332	42	115
REGULATION OF PATHWAY-RESTRICTED SMAD PROTEIN PHOSPHORYLATION%GOBP%GO:0060393	REGULATION OF PATHWAY-RESTRICTED SMAD PROTEIN PHOSPHORYLATION%GOBP%GO:0060393	0.0103714	0.0628204	-1	BMP10,ENG,BMP7,LRP1,GDF15,BMPER,SNX25,EMILIN1,NOG,SDCBP,TGFBR1,LEFTY2,TWSG1,INHBE,GDF6,TGFB1,BMP5	-1.62175	-0.566296	17	25
MRNA 3'-END PROCESSING%REACTOME%R-HSA-72187.4	MRNA 3'-END PROCESSING%REACTOME%R-HSA-72187.4	0.0104052	0.062928	-1	THOC2,RNPS1,SRSF9,CPSF2,FIP1L1,THOC1,SRSF4,THOC6,CPSF4,PCF11,SRSF11,ZC3H11A,PABPN1,SRRM1,SARNP,THOC5,CSTF3,NCBP1,NCBP2,SRSF1,SRSF5,DDX39A,CPSF3	-1.58256	-0.474045	23	54
PROTEIN TARGETING TO MITOCHONDRION%GOBP%GO:0006626	PROTEIN TARGETING TO MITOCHONDRION%GOBP%GO:0006626	0.0105008	0.0634087	1	TIMM17A,MFN2,CHCHD4,TIMM8B,TIMM13,HSP90AA1,TOMM34,TIMM50,TOMM7,TIMM23,MIPEP,TOMM22,MFF,TIMM17B,TOMM40,TIMM44,DNLZ,TIMM10B,FIS1,ROMO1,SAMM50	1.59701	0.45915	21	43
SIGNAL RELEASE%GOBP%GO:0023061	SIGNAL RELEASE%GOBP%GO:0023061	0.0105246	0.063455	-1	STXBP2,STXBP1,LIN7C,STXBP3,STX1B,STX3,SLC32A1,PIP5K1C,PDZD11,STX2,SNAP25,LTBP4,PCSK5,SNAP23,STX4,LIN7A,PCLO,SYT7	-1.60734	-0.503951	18	41
REGULATION OF RESPONSE TO EXTERNAL STIMULUS%GOBP%GO:0032101	REGULATION OF RESPONSE TO EXTERNAL STIMULUS%GOBP%GO:0032101	0.0106277	0.0639778	-1	GGT3P,MOSPD2,MTUS1,CADM1,VAMP8,SERPINB9,YES1,BRD4,ANO6,IFI16,MFHAS1,ADAM17,CD109,EPHB2,STX3,CD9,ADAM10,APOA1,MPP1,CD55,METRNL,SIRPA,SEMA4B,ST3GAL4,LYN,P2RX4,NRP1,LYAR,PAK1,SEMA4D,VTN,SHPK,PDGFB,DDX58,TRAF3IP1,SEMA3C,SERPINE2,FURIN,SEMA4C,PRKCD,HLA-A,THBS1,FGG,TARBP2,PQBP1,A2M,ELMOD2,PDCD4,SIN3A,TUBB2B,ROBO2,FGF2,RAC1,POLR3F,JAM3,VAMP7,XRCC5,SERPINE1,GAS6,CD36,SRC,ADAMTS12,XRCC6,CAV1,CACTIN,ZMPSTE…	-1.35407	-0.32628	71	268
AMINOGLYCAN BIOSYNTHETIC PROCESS%GOBP%GO:0006023	AMINOGLYCAN BIOSYNTHETIC PROCESS%GOBP%GO:0006023	0.0107385	0.0642813	-1	CHST6,CHST14,CHSY1,ST3GAL4,HS3ST3B1,UGDH,B4GAT1,CHST12,HS3ST1,PXYLP1,ST3GAL1,CHST11,EXT2,GLCE,B3GAT3,CHPF,B3GNT2,ST3GAL2,CHST7	-1.6218	-0.541808	19	31
GLYCOSAMINOGLYCAN BIOSYNTHETIC PROCESS%GOBP%GO:0006024	GLYCOSAMINOGLYCAN BIOSYNTHETIC PROCESS%GOBP%GO:0006024	0.0107385	0.0642813	-1	CHST6,CHST14,CHSY1,ST3GAL4,HS3ST3B1,UGDH,B4GAT1,CHST12,HS3ST1,PXYLP1,ST3GAL1,CHST11,EXT2,GLCE,B3GAT3,CHPF,B3GNT2,ST3GAL2,CHST7	-1.6218	-0.541808	19	31
CENTROSOME MATURATION%REACTOME%R-HSA-380287.2	CENTROSOME MATURATION%REACTOME%R-HSA-380287.2	0.0107436	0.0642813	1	PCM1,TUBA1A,SSNA1,OFD1,CEP135,TUBB,PPP2R1A,DYNC1H1,TUBB4B,HSP90AA1,CEP131,ACTR1A,TUBGCP5,PAFAH1B1,TUBGCP3,CDK5RAP2,YWHAE,PRKACA,CSNK1E,CDK1,DYNC1I2,NDE1,CLASP1,PCNT,NME7,DCTN3,MAPRE1,CEP290,PRKAR2B,CNTRL,HAUS5,TUBGCP4,DCTN2,CEP41,HAUS8,HAUS3,TUBGCP6	1.55058	0.415032	37	60
RECRUITMENT OF MITOTIC CENTROSOME PROTEINS AND COMPLEXES%REACTOME DATABASE ID RELEASE 77%380270	RECRUITMENT OF MITOTIC CENTROSOME PROTEINS AND COMPLEXES%REACTOME DATABASE ID RELEASE 77%380270	0.0107436	0.0642813	1	PCM1,TUBA1A,SSNA1,OFD1,CEP135,TUBB,PPP2R1A,DYNC1H1,TUBB4B,HSP90AA1,CEP131,ACTR1A,TUBGCP5,PAFAH1B1,TUBGCP3,CDK5RAP2,YWHAE,PRKACA,CSNK1E,CDK1,DYNC1I2,NDE1,CLASP1,PCNT,NME7,DCTN3,MAPRE1,CEP290,PRKAR2B,CNTRL,HAUS5,TUBGCP4,DCTN2,CEP41,HAUS8,HAUS3,TUBGCP6	1.55058	0.415032	37	60
DOWNREGULATION OF ERBB2 SIGNALING%REACTOME DATABASE ID RELEASE 77%8863795	DOWNREGULATION OF ERBB2 SIGNALING%REACTOME DATABASE ID RELEASE 77%8863795	0.0107981	0.0645093	1	RNF41,HSP90AA1,NRG1,PTPN12,AKT3,UBA52,USP8,CDC37	1.69999	0.632296	8	15
MTOR SIGNALLING%REACTOME%R-HSA-165159.6	MTOR SIGNALLING%REACTOME%R-HSA-165159.6	0.0108696	0.0648375	1	RRAGC,TSC2,EIF4G1,RRAGA,YWHAB,LAMTOR3,STRADA,EIF4E,RPTOR,AKT1S1,LAMTOR1,CAB39,MTOR,PPM1A,FKBP1A,EIF4B,RPS6	1.60921	0.476781	17	37
PLASMA MEMBRANE ESTROGEN RECEPTOR SIGNALING%PATHWAY INTERACTION DATABASE NCI-NATURE CURATED DATA%PLASMA MEMBRANE ESTROGEN RECEPTOR SIGNALING	PLASMA MEMBRANE ESTROGEN RECEPTOR SIGNALING%PATHWAY INTERACTION DATABASE NCI-NATURE CURATED DATA%PLASMA MEMBRANE ESTROGEN RECEPTOR SIGNALING	0.0109037	0.0649423	-1	NRAS,GNAZ,KRAS,GNAQ,GNAI3,GNB1,MMP2,GNAI2,HRAS,GNA14,RHOA,GNA11,SRC,GNA13,GNAI1	-1.61913	-0.540916	15	31
PEROXISOME ORGANIZATION%GOBP%GO:0007031	PEROXISOME ORGANIZATION%GOBP%GO:0007031	0.0113105	0.0671848	1	DNM1L,ZFAND6,ACOT8,PEX12,PEX6,PEX3,TMEM135,LONP2,ABCD3,MFF,PEX10,HACL1,FIS1,PEX14	1.65897	0.54861	14	23
NEGATIVE REGULATION OF LOCOMOTION%GOBP%GO:0040013	NEGATIVE REGULATION OF LOCOMOTION%GOBP%GO:0040013	0.0113144	0.0671848	-1	STC1,THY1,BMP10,RECK,PODN,ENG,ATP1B2,JUP,CDH1,SP100,LRP1,RAP2C,DCN,SEMA4B,ZMYND8,SFRP1,BST2,WNT11,EMILIN1,SEMA4D,ADAMTS9,SEMA3C,MECP2,SEMA4C,MAGI2,IGFBP5,THBS1,CHRD,KRIT1,ATP2B4,RHOA,ROBO2,NOG,FGF2,RAC1,SERPINE1,RAP2B,IGFBP3,DAG1,ITGB1BP1,CERS2	-1.42851	-0.370786	41	134
EPITHELIAL CELL DEVELOPMENT%GOBP%GO:0002064	EPITHELIAL CELL DEVELOPMENT%GOBP%GO:0002064	0.0113618	0.0673644	-1	MARVELD2,STC1,POF1B,F11R,ICAM1,SLC4A7,RAB13,PODXL,TJP1,RAP2C,IQGAP1,PDGFB,RAP1B,MAGI2,RDX,CDK6,RAP1A,RAPGEF6,SRC,RAP2B	-1.59325	-0.483406	20	49
POSITIVE REGULATION OF CYTOSOLIC CALCIUM ION CONCENTRATION%GOBP%GO:0007204	POSITIVE REGULATION OF CYTOSOLIC CALCIUM ION CONCENTRATION%GOBP%GO:0007204	0.0114833	0.0679816	-1	THY1,ITPR1,CD55,LPAR2,CACNB3,ITPR3,P2RX4,CHERP,CACNA1C,NPTN,ATP2B4,CACNA2D1,FGF2,JPH1,CD36,CAV1	-1.60418	-0.505436	16	40
REV-MEDIATED NUCLEAR EXPORT OF HIV RNA%REACTOME%R-HSA-165054.2	REV-MEDIATED NUCLEAR EXPORT OF HIV RNA%REACTOME%R-HSA-165054.2	0.0115683	0.0683253	-1	NUP85,AAAS,TPR,NUP35,NUP62,NUP153,NUP54,NUP50,NUP155,RANBP2,RAE1,NUP88,NUP160,RCC1,NUP210,NUP107,NDC1	-1.61955	-0.544272	17	30
CELLULAR RESPONSE TO STARVATION%GOBP%GO:0009267	CELLULAR RESPONSE TO STARVATION%GOBP%GO:0009267	0.0115761	0.0683253	1	MAP1LC3B,HSPA8,MTMR3,TFEB,RRAGC,NUAK1,ATG5,EIF2S1,ZFYVE1,WIPI1,USP33,MAPK1,WDR45,FOXO1,RPTOR,PICK1,EIF2AK3,CLEC16A,ATG14,BMPR2,ATG7,CPEB4,MTOR,PIK3R4,DAP,XPR1,FAS,GABARAPL2,PRKD1,ZC3H12A,FOXO3,WDR24	1.50853	0.38865	32	74
INTERACTIONS OF REV WITH HOST CELLULAR PROTEINS%REACTOME DATABASE ID RELEASE 77%177243	INTERACTIONS OF REV WITH HOST CELLULAR PROTEINS%REACTOME DATABASE ID RELEASE 77%177243	0.0116911	0.0688521	-1	NUP85,AAAS,TPR,NUP35,NUP62,NUP153,NUP54,NUP50,NUP155,RANBP2,RAE1,NUP88,NUP160,RCC1,NUP210,NUP107,NDC1	-1.60698	-0.532715	17	32
CELLULAR RESPONSES TO STIMULI%REACTOME%R-HSA-8953897.5	CELLULAR RESPONSES TO STIMULI%REACTOME%R-HSA-8953897.5	0.0117005	0.0688521	1	RPS4Y1,DNAJC7,ACADVL,HSPA8,HSPH1,TLN1,PSME4,RPL37,COX16,RPS29,MAPKAPK2,CEBPG,GOSR2,RRAGC,SEC31A,RPS10,SURF1,AGO4,CAMK2D,UBE2S,ERF,UBE2D3,RRAGA,RPS14,RPL36AL,TNIK,PSMF1,RPS18,RPS16,LRPPRC,RPLP1,HIF1AN,RPS28,RPL36,DYNC1H1,UBE2D1,ACTR10,ATF3,RPL27,EIF2S2,HSP90AA1,RPL36A,CDK4,RPS19,RPS2,EIF2S1,RPL23,RPS20,RPL19,NR3C1,ASF1A,PRDX2,DCTN5,TPP1,LAMTOR3,RPS5,PSMD9,HDGF,PSME3,WIPI1,HSPA14,RPL17,RPL10A,RPL11…	1.21987	0.248986	149	488
REGULATION OF ANION TRANSPORT%GOBP%GO:0044070	REGULATION OF ANION TRANSPORT%GOBP%GO:0044070	0.0117768	0.0691972	-1	TRH,STC1,ATP1A2,P2RX4,CRY2	-1.64233	-0.618721	5	18
PLASMA MEMBRANE INVAGINATION%GOBP%GO:0099024	PLASMA MEMBRANE INVAGINATION%GOBP%GO:0099024	0.0119474	0.0700952	-1	XKR8,SNX9,THBS1,RHOA,RHOG,RAC1,VAMP7,CD36,SNX18,CDC42	-1.64156	-0.618431	10	18
CYTOSOLIC TRANSPORT%GOBP%GO:0016482	CYTOSOLIC TRANSPORT%GOBP%GO:0016482	0.0119741	0.0701468	1	RILP,DENND5A,HOOK2,SNX2,VPS35,TBC1D17,LAMP1,VPS26B,RAB9B,SNX3,PTPN23,SNX12,SNX5,CLN5,VPS51,WIPI1,YKT6,SORT1,HEATR5A,TBC1D10A,GAK,AKTIP,TBC1D10B,SPAG9,SNX8,UBE2O,DCTN1,KIF1C,SNX6	1.45536	0.354839	29	102
RNA POLYMERASE II TRANSCRIPTION TERMINATION%REACTOME%R-HSA-73856.4	RNA POLYMERASE II TRANSCRIPTION TERMINATION%REACTOME%R-HSA-73856.4	0.0121763	0.0712252	-1	THOC2,RNPS1,SRSF9,CPSF2,FIP1L1,THOC1,SRSF4,THOC6,CPSF4,PCF11,SRSF11,SLBP,ZC3H11A,PABPN1,SRRM1,SARNP,THOC5,CSTF3,NCBP1,NCBP2,SRSF1,SNRPB,SRSF5,DDX39A,CPSF3	-1.55245	-0.453163	25	61
DEMETHYLATION%GOBP%GO:0070988	DEMETHYLATION%GOBP%GO:0070988	0.0122638	0.0716303	-1	ALKBH5,KDM2B,PHF8,KDM3B,KDM4B,PHF2,KDM5B,KDM3A,KDM5A,KDM5C,KDM4C	-1.61107	-0.552511	11	27
PID_HIF1_TFPATHWAY%MSIGDB_C2%PID_HIF1_TFPATHWAY	PID_HIF1_TFPATHWAY%MSIGDB_C2%PID_HIF1_TFPATHWAY	0.0122888	0.0716694	-1	HK2,ENG,SP1,PFKL,JUN,FURIN,BNIP3,NCOA1,SERPINE1	-1.63774	-0.616992	9	18
PID_ER_NONGENOMIC_PATHWAY%MSIGDB_C2%PID_ER_NONGENOMIC_PATHWAY	PID_ER_NONGENOMIC_PATHWAY%MSIGDB_C2%PID_ER_NONGENOMIC_PATHWAY	0.0124688	0.0726115	-1	NRAS,GNAZ,KRAS,GNAQ,GNAI3,GNB1,MMP2,HRAS,GNA14,GNA11,SRC,GNA13,GNAI1	-1.61118	-0.557021	13	26
CELL JUNCTION ORGANIZATION%REACTOME%R-HSA-446728.2	CELL JUNCTION ORGANIZATION%REACTOME%R-HSA-446728.2	0.012488	0.0726154	-1	CADM1,F11R,LAMC2,LAMB3,LAMA3,ITGA6,JUP,CDH1,CLDN6,PLEC,CTNNA1,SDK2,CTNNB1	-1.60568	-0.508855	13	39
PI3K AKT SIGNALING IN CANCER%REACTOME DATABASE ID RELEASE 77%2219528	PI3K AKT SIGNALING IN CANCER%REACTOME DATABASE ID RELEASE 77%2219528	0.0125133	0.072655	1	FGF1,PIK3R1,PIK3CA,PTEN,TSC2,PTPN11,CASP9,STRN,FOXO1,AKT1S1,BAD,GSK3B,MTOR,NRG1,RPS6KB2,RICTOR,AKT3,FYN,FOXO3	1.58632	0.466423	19	39
MUSCLE SYSTEM PROCESS%GOBP%GO:0003012	MUSCLE SYSTEM PROCESS%GOBP%GO:0003012	0.0127452	0.0738923	-1	MYH6,ASPH,ATP1A2,CACNB2,ATP1B1,ATP1A1,GATM,FXYD1,TMOD1,MYH8,TCAP,MYOF,MYH3,P2RX4,PIK3C2A,DTNA,MYOM1,TMOD3,CACNA1C,MYBPC3,TTN,KCNJ8,MYL6B,ATP2B4,KCNQ1,MYOM2,DES,CACNA2D1,HRC,UTRN	-1.46629	-0.391874	30	107
CARDIAC SEPTUM DEVELOPMENT%GOBP%GO:0003279	CARDIAC SEPTUM DEVELOPMENT%GOBP%GO:0003279	0.0129022	0.0746918	-1	ENG,BMP7,NRP2,HEY2,STRA6,NRP1,NKX2-5,SEMA3C,CRELD1,ROBO2,NOG,TGFBR1	-1.60687	-0.523777	12	34
CELL RECOGNITION%GOBP%GO:0008037	CELL RECOGNITION%GOBP%GO:0008037	0.0130557	0.0754692	-1	CADM1,VSTM2L,BSG,FOLR1,EPHB2,CD9,VCAN	-1.60205	-0.538392	7	30
POSITIVE REGULATION OF CATION TRANSMEMBRANE TRANSPORT%GOBP%GO:1904064	POSITIVE REGULATION OF CATION TRANSMEMBRANE TRANSPORT%GOBP%GO:1904064	0.0131267	0.075768	-1	THY1,CACNB2,TESC,ATP1B1,SLC9A1,ATP1B2,FXYD1,ANO6,EPHB2,CACNB3,ANK3,WNK2,ATP1B3,NOS1AP	-1.57706	-0.480026	14	48
PARKINSON DISEASE%PANTHER PATHWAY%P00049	PARKINSON DISEASE%PANTHER PATHWAY%P00049	0.0131532	0.0757927	1	HSPA8,HSPA8,HSPA8,SEPT5,CSK,CSK,CSK,YWHAB,YWHAB,YWHAB,MAPK1,MAPK1,MAPK1,SNCA,SNCA,PSMA5,PSMA5,PSMA5,PAG1,CSNK2B,CSNK2B,CSNK2B,CCNE1,CCNE1,CCNE1,PSMA1,PSMA1,PSMA1,PSMA1,UCHL1,UCHL1,PSMA7,PSMA7,PSMA7,PSMB3,PSMB3,PSMB3,HSPA9,HSPA9,FYN,FYN,YWHAE,YWHAE,MAPK14,MAPK14,HSPA2,HSPA2,CSNK1E,CSNK1E,PSMA6,PSMA6,HSPA6,MAPK9,MAPK9	1.37788	0.320512	54	139
UNTITLED%PANTHER PATHWAY%P00019	UNTITLED%PANTHER PATHWAY%P00019	0.0131696	0.0757927	-1	PCK2,ITPR1,ITPR1,ITPR1,GNAQ,GNAQ,GNAQ,ADCY9,ADCY9,ITPR3,ITPR3,GNAS,GNAS,FURIN,FURIN,PRKCD,PRKCD,GNA14,GNA14	-1.48854	-0.411665	19	86
RIBOSOMAL SMALL SUBUNIT ASSEMBLY%GOBP%GO:0000028	RIBOSOMAL SMALL SUBUNIT ASSEMBLY%GOBP%GO:0000028	0.0132953	0.0764044	1	MRPS11,RPS14,RPS28,RPS19,MRPS7,RPS5,ERAL1,RPSA	1.66902	0.612275	8	16
CELL ACTIVATION INVOLVED IN IMMUNE RESPONSE%GOBP%GO:0002263	CELL ACTIVATION INVOLVED IN IMMUNE RESPONSE%GOBP%GO:0002263	0.0133377	0.0765359	-1	VAMP8,STXBP2,ICAM1,STXBP3,LRP1,DOCK11,ATP7A	-1.59724	-0.529488	7	32
TRANSPORT OF RIBONUCLEOPROTEINS INTO THE HOST NUCLEUS%REACTOME%R-HSA-168271.3	TRANSPORT OF RIBONUCLEOPROTEINS INTO THE HOST NUCLEUS%REACTOME%R-HSA-168271.3	0.0134239	0.0769181	-1	NUP85,AAAS,TPR,NUP35,NUP62,NUP153,NUP54,NUP50,NUP155,RANBP2,RAE1,NUP88,NUP160,NUP210,NUP107,NDC1	-1.60518	-0.550493	16	27
REGULATION OF DENDRITIC SPINE MORPHOGENESIS%GOBP%GO:0061001	REGULATION OF DENDRITIC SPINE MORPHOGENESIS%GOBP%GO:0061001	0.0135335	0.0773978	1	DBN1,SIPA1L1,RELN,PTEN,CFL1,CAPRIN1,DBNL,LRP8	1.65481	0.555134	8	22
SKELETAL SYSTEM MORPHOGENESIS%GOBP%GO:0048705	SKELETAL SYSTEM MORPHOGENESIS%GOBP%GO:0048705	0.0135497	0.0773978	-1	FREM1,COL2A1,STC1,FBN2,BMP1,RAB23,CTNNB1,HOXB4,NOG,TGFBR1,CER1	-1.60168	-0.559289	11	25
STEM CELL DIFFERENTIATION%GOBP%GO:0048863	STEM CELL DIFFERENTIATION%GOBP%GO:0048863	0.0135711	0.0773978	-1	FOLR1,TCOF1,FN1,SEMA4B,SFRP1,EPCAM,NRP1,SEMA4D,HAND2,MTF2,SEMA3C,NOLC1,TAPT1,SETD2,SEMA4C,RADIL,ZNF281,HOXB4,RBPJ,NELFB,MLLT3,UFL1,TP53,SEMA3B,FAM172A,CDH2	-1.57197	-0.473331	26	52
GO ID NOT FOUND IN OBO FILE ONTOLOGY DEFINITIONS%GOBP%GO:0043044	GO ID NOT FOUND IN OBO FILE ONTOLOGY DEFINITIONS%GOBP%GO:0043044	0.0135865	0.0773978	-1	SMARCD2,HDAC1,PBRM1,ARID1A,ERCC6,ACTL6A,CECR2,CHD8,ACTB,SMARCA2,SMARCA4,SMARCC1,HNRNPC,CHD4,SMARCC2,SMARCAD1,INO80B,RBBP4,SMARCB1,SMARCE1,HDAC2	-1.59106	-0.522978	21	33
NUCLEOBASE-CONTAINING COMPOUND TRANSPORT%GOBP%GO:0015931	NUCLEOBASE-CONTAINING COMPOUND TRANSPORT%GOBP%GO:0015931	0.0136397	0.0775883	-1	SLC28A3,NUP85,THOC2,ALKBH5,TPR,NUP62,FLOT1,TST,NUP153,THOC1,POLR2D,PNPT1,KIF5C,THOC6,NUP155,ENY2,SLBP,RAE1,ZC3H11A,PABPN1,LRRC8A,NUP88,SMG1,SARNP,THOC5,NUP160,SSB,PCID2,NCBP1,NCBP2,GLE1,NUP107,DDX39A,RBM15B,AGFG1	-1.48792	-0.412193	35	85
MRNA TRANSPORT%GOBP%GO:0051028	MRNA TRANSPORT%GOBP%GO:0051028	0.0137289	0.0779825	-1	NUP85,THOC2,ALKBH5,TPR,THOC1,POLR2D,KIF5C,THOC6,ENY2,SLBP,ZC3H11A,PABPN1,NUP88,SMG1,SARNP,THOC5,NUP160,PCID2,NCBP1,GLE1,NUP107,DDX39A,RBM15B,AGFG1,YTHDC1,NUP214,NUP133	-1.57439	-0.477682	27	49
BIOCARTA_IGF1R_PATHWAY%MSIGDB_C2%BIOCARTA_IGF1R_PATHWAY	BIOCARTA_IGF1R_PATHWAY%MSIGDB_C2%BIOCARTA_IGF1R_PATHWAY	0.013859	0.0785775	1	PIK3R1,PIK3CA,PRKAR1A,RAF1,MAPK1,SHC1,BAD,SOS1	1.6594	0.596936	8	17
REGULATION OF CELLULAR PROTEIN CATABOLIC PROCESS%GOBP%GO:1903362	REGULATION OF CELLULAR PROTEIN CATABOLIC PROCESS%GOBP%GO:1903362	0.0138737	0.0785775	1	OPHN1,PTTG1IP,GLMN,VPS35,RNF14,ATP13A2,COMMD1,PARK7,RCHY1,PTEN,NUB1,SIRT2,PRICKLE1,PSMF1,GIPC1,HSP90AA1,AMER1,HECTD1,ARAF,GBA,RPL23,ARIH1,BAG6,USP5,PSME3,ARIH2,RPL11,NUDT15,VCP,OGT,USP25,UBXN1,ZYG11B,CCDC22,GSK3B,HSPBP1,KEAP1,HSP90AB1,RPS7,GABARAPL2,EIF3H,ATXN3,USP19,USP13,GPX1,BAG2,DACT1	1.37252	0.317988	47	145
NOTCH-MEDIATED HES HEY NETWORK%PATHWAY INTERACTION DATABASE NCI-NATURE CURATED DATA%NOTCH-MEDIATED HES HEY NETWORK	NOTCH-MEDIATED HES HEY NETWORK%PATHWAY INTERACTION DATABASE NCI-NATURE CURATED DATA%NOTCH-MEDIATED HES HEY NETWORK	0.0139848	0.0789791	-1	HEY2,PARP1,HDAC1,ARNT,RBPJ,NCOA1,YY1,CDKN1B,TCF3,KDM1A,EP300	-1.61416	-0.574392	11	23
POSITIVE REGULATION OF DNA-TEMPLATED TRANSCRIPTION, ELONGATION%GOBP%GO:0032786	POSITIVE REGULATION OF DNA-TEMPLATED TRANSCRIPTION, ELONGATION%GOBP%GO:0032786	0.0139848	0.0789791	-1	BRD4,HMGN1,THOC1,SCAF8,CDK12,ELL,SUPT16H,ERCC6,CDC73,CCNK,THOC5,CDK13,CCNT1,LEO1,SUPT6H,TCERG1,CCNT2	-1.61346	-0.574144	17	23
RNA EXPORT FROM NUCLEUS%GOBP%GO:0006405	RNA EXPORT FROM NUCLEUS%GOBP%GO:0006405	0.0140758	0.0793138	-1	NUP85,THOC2,ALKBH5,TPR,NUP62,NUP153,THOC1,POLR2D,THOC6,NUP155,ENY2,RAE1,ZC3H11A,PABPN1,NUP88,SMG1,SARNP,THOC5,NUP160,SSB,PCID2,NCBP1,NCBP2,GLE1,NUP107,DDX39A,RBM15B,AGFG1	-1.53633	-0.450031	28	60
CADHERIN SIGNALING PATHWAY%PANTHER PATHWAY%P00012	CADHERIN SIGNALING PATHWAY%PANTHER PATHWAY%P00012	0.0140845	0.0793138	-1	FZD6,FZD6,YES1,YES1,PCDHGB6,CDH1,CDH1,CDH1,LYN,LYN,PCDHB14,PCDHB14,WNT11,WNT11,WNT11,FAT1,FAT1,ERBB3,ERBB3,CTNNB1,CTNNB1,CTNNB1,PCDH18,PCDH18,SRC,SRC,TCF7L1,TCF7L1,TCF7L1,CELSR2,CELSR2,WNT5B,WNT5B,WNT5B,ACTB,ACTB,ACTB,CTNND1,CTNND1,CDH2,CDH2,CDH2	-1.43723	-0.377845	42	121
HALLMARK_KRAS_SIGNALING_UP%MSIGDB_C2%HALLMARK_KRAS_SIGNALING_UP	HALLMARK_KRAS_SIGNALING_UP%MSIGDB_C2%HALLMARK_KRAS_SIGNALING_UP	0.0141923	0.0798063	-1	EPB41L3,ENG,JUP,PLAUR,ADAM17,EPHB2,AKAP12,NRP1,ANGPTL4,CBX8,SNAP25,CBR4,IGF2,F13A1	-1.57273	-0.493101	14	41
POSITIVE REGULATION OF CELL-CELL ADHESION%GOBP%GO:0022409	POSITIVE REGULATION OF CELL-CELL ADHESION%GOBP%GO:0022409	0.0142267	0.0798507	-1	THY1,YES1,F11R,BMP7,FLOT2,PLAUR,CD55,PODXL,TJP1,CD44,SIRPA,ANK3,ST3GAL4,LYN,FLOT1,HLA-A,FGG,IGF2,RHOA,JAK1,NKAP,PIEZO1,SRC,CAV1	-1.52745	-0.441096	24	65
DISEASES OF CARBOHYDRATE METABOLISM%REACTOME%R-HSA-5663084.3	DISEASES OF CARBOHYDRATE METABOLISM%REACTOME%R-HSA-5663084.3	0.0142409	0.0798507	1	GNS,IDUA,SGSH,ARSB,GYG1,RPIA,GLB1,GALNS,UBA52	1.6632	0.590245	9	18
TRIGLYCERIDE METABOLIC PROCESS%GOBP%GO:0006641	TRIGLYCERIDE METABOLIC PROCESS%GOBP%GO:0006641	0.0142685	0.0798915	-1	PCK2,CPS1,LIPH,LIPG,CAV1,SIRT1,LPIN3,PNPLA4,LPGAT1	-1.63661	-0.624369	9	17
ANATOMICAL STRUCTURE HOMEOSTASIS%GOBP%GO:0060249	ANATOMICAL STRUCTURE HOMEOSTASIS%GOBP%GO:0060249	0.014342	0.0801885	-1	LAMA2,LAMC1,F11R,OCLN,ATP1B2,RCN3,SLC2A1,TJP1,P2RX4,CXADR	-1.54935	-0.465092	10	53
CIRCULATORY SYSTEM PROCESS%GOBP%GO:0003013	CIRCULATORY SYSTEM PROCESS%GOBP%GO:0003013	0.0144645	0.0807586	-1	MYH6,ATP1A2,CACNB2,ATP2B1,COL1A2,ATP1B1,ATP1A1,YES1,SLC4A8,CPS1,OCLN,ATP1B2,SLC2A3,SLC2A1,LRP1,SLC9A3R1,TCAP,TJP1,MYOF,P2RX4,PIK3C2A,PDGFB,CACNA1C,SLC1A5,MYBPC3,SLC16A7,TTN,FGG,KCNJ8,CTSZ,ATP2B4,KCNQ1,SLC1A4,SCPEP1,CACNA2D1,PCSK5,MYL3,GAS6,CD36,SRC,CAV1,AGT,MYL4,ITGB1BP1,TNNC1,SLC1A3,TFRC	-1.40854	-0.363822	47	140
PID_CMYB_PATHWAY%MSIGDB_C2%PID_CMYB_PATHWAY	PID_CMYB_PATHWAY%MSIGDB_C2%PID_CMYB_PATHWAY	0.0145382	0.0810134	-1	NRAS,ATP2B1,COL1A2,KRAS,SP1,HRAS,SIN3A,CDK6,CDKN1B	-1.58933	-0.53096	9	31
RESPONSE TO DECREASED OXYGEN LEVELS%GOBP%GO:0036293	RESPONSE TO DECREASED OXYGEN LEVELS%GOBP%GO:0036293	0.0145515	0.0810134	-1	PLOD2,BMP7,ITPR1,AK4,ADAM17,LOXL2,PDK3,NDRG1,MMP2,SFRP1,ALKBH5,PLOD1,ANGPTL4,ARNT,FABP1,BNIP3,PML,THBS1,PDK1,TBL2,HSP90B1,RBPJ,LONP1,FAM162A,CAV1,HMOX2,AQP1,EP300,TP53,SIRT1,PGK1,RYR2	-1.49094	-0.420433	32	76
RESOLUTION OF ABASIC SITES (AP SITES)%REACTOME DATABASE ID RELEASE 77%73933	RESOLUTION OF ABASIC SITES (AP SITES)%REACTOME DATABASE ID RELEASE 77%73933	0.0146131	0.0811264	-1	NTHL1,PARP2,RFC1,PARP1,POLB,LIG3,XRCC1,POLD3	-1.59564	-0.543506	8	28
EPH-EPHRIN MEDIATED REPULSION OF CELLS%REACTOME%R-HSA-3928665.3	EPH-EPHRIN MEDIATED REPULSION OF CELLS%REACTOME%R-HSA-3928665.3	0.0146131	0.0811264	-1	YES1,EFNB3,EPHB2,ADAM10,AP2M1,AP2A2,LYN,MMP2	-1.59236	-0.542389	8	28
REGULATION OF CELL ACTIVATION%GOBP%GO:0050865	REGULATION OF CELL ACTIVATION%GOBP%GO:0050865	0.0146479	0.0812047	-1	THY1,VAMP8,STXBP2,YES1,F11R,LOXL3,FLOT2,MFHAS1,EPHB2,CD9,CD55,SIRPA,LYN,SFRP1,MMP14,EMILIN1,SHPK,PDGFB,TP53BP1,MAD2L2,SERPINE2,AXL,PRKCD,HLA-A,THBS1,IGF2,THOC1,ZNF335,NKAP,VAMP7,GAS6,SRC,XRCC6,CAV1,STX4	-1.42911	-0.375708	35	121
BASE EXCISION REPAIR%REACTOME%R-HSA-73884.2	BASE EXCISION REPAIR%REACTOME%R-HSA-73884.2	0.0150339	0.083227	-1	NTHL1,PARP2,RFC1,PARP1,POLB,LIG3,XRCC1,POLD3,TERF2IP,NEIL2	-1.58745	-0.530334	10	31
PROTEIN LOCALIZATION%REACTOME%R-HSA-9609507.2	PROTEIN LOCALIZATION%REACTOME%R-HSA-9609507.2	0.0150804	0.0833672	1	TIMM17A,ACAA1,ACOX3,ZFAND6,UBE2D3,ACOT8,CHCHD4,TIMM8B,UBE2D1,TIMM13,VDAC1,PEX12,UBL4A,BAG6,AGPS,PEX6,TIMM50,PEX3,SLC25A6,TOMM7,SLC25A12,ACOX1,TIMM23,LONP2,CHCHD7,CAT,ABCD3,TOMM22,IDE,CYC1,HSPA9,GSTK1,UBA52,CS,TIMM17B,TOMM40,SLC25A4,ATAD1,CHCHD3,ACO2,TIMM44,PEX10,HACL1,TIMM10B,FIS1,DDO,HSD17B4,PEX14,CHCHD10	1.40611	0.334838	49	117
ESR-MEDIATED SIGNALING%REACTOME DATABASE ID RELEASE 77%8939211	ESR-MEDIATED SIGNALING%REACTOME DATABASE ID RELEASE 77%8939211	0.015167	0.0837277	-1	GNG5,NRAS,ATF2,GNB4,GNAI3,FKBP5,GNB1,MOV10,MMP2,SP1,GNAI2,HRAS,HDAC1,JUN,KDM4B,GNB2,POLR2I,POLR2D,SMC1A,JUND,STAG2,POU2F1,NCOA1,SRC,PTGES3,YY1,CAV1,CDKN1B,GNAI1,KDM1A	-1.44853	-0.392639	30	98
CELLULAR NITROGEN COMPOUND CATABOLIC PROCESS%GOBP%GO:0044270	CELLULAR NITROGEN COMPOUND CATABOLIC PROCESS%GOBP%GO:0044270	0.0152305	0.083886	1	CRMP1,PABPC4,CSDE1,SAMD4A,CTIF,DPYSL4,NUDT16,ENTPD4,RNH1,DPYSL3,EIF3E,AGO4,YTHDF2,NT5C2,DCTPP1,PDE4D,DDX5,LSM1,ZPR1,APEX1,NUDT5,GSPT1,NUDT11,TET2,DXO,ENPP4,TTC37,RC3H1,NUDT1,SMG9,UPF1,NUDT15,CNOT10,VCP,DIS3L2,CNOT7,BLVRB,DPYSL5,ADAL,SND1,SMG6,NT5C,EXOG,EDC3,NUDT3,SETMAR,EXOSC8,PATL1,CNOT2,NUDT4,ZC3H12A,NIT1,DNASE2,UPF2,ZFP36L1,UPF3B,SKIV2L,ITPA,CNOT1,SARM1	1.32585	0.298765	60	177
CARDIAC VENTRICLE MORPHOGENESIS%GOBP%GO:0003208	CARDIAC VENTRICLE MORPHOGENESIS%GOBP%GO:0003208	0.0152384	0.083886	-1	MYH6,BMP10,DSP,ENG,HEY2,NKX2-5,MYBPC3,NOG,RBPJ,MYL3,TGFBR1,TNNC1,PKP2,TBX20,MYH7,TGFB1,RYR2,TPM1	-1.57529	-0.510321	18	35
AGGREPHAGY%REACTOME%R-HSA-9646399.3	AGGREPHAGY%REACTOME%R-HSA-9646399.3	0.0152927	0.0840671	1	UBE2N,PARK7,DYNC1H1,HSP90AA1,DYNC1I1,VCP,UBE2V1,UBA52,HSF1,DYNC1I2,DYNC1LI1,PCNT	1.64199	0.590673	12	17
NEGATIVE REGULATION OF CELL MIGRATION%GOBP%GO:0030336	NEGATIVE REGULATION OF CELL MIGRATION%GOBP%GO:0030336	0.0153213	0.0841066	-1	STC1,THY1,BMP10,RECK,PODN,ENG,ATP1B2,JUP,CDH1,SP100,LRP1,RAP2C,DCN,ZMYND8,SFRP1,BST2,WNT11,EMILIN1,ADAMTS9,MECP2,MAGI2,IGFBP5,THBS1,CHRD,KRIT1,ATP2B4,RHOA,NOG,FGF2,RAC1,SERPINE1,RAP2B,IGFBP3,DAG1,ITGB1BP1,CERS2	-1.4343	-0.378266	36	118
PROTEIN MODIFICATION BY SMALL PROTEIN REMOVAL%GOBP%GO:0070646	PROTEIN MODIFICATION BY SMALL PROTEIN REMOVAL%GOBP%GO:0070646	0.0154348	0.0846114	1	COPS4,COPS2,OTUB1,USP5,USP33,USP15,USP25,EIF3F,VCPIP1,USP4,USP24,OTUD7B,USP47,SENP8,USP16,COPS5,UCHL1,ATXN3,USP30,COPS3,USP19,USP13,UCHL3,USP10,ZC3H12A,TRRAP,USP8,SPATA2,CDK1,COPS7B,BRCC3,COPS6,USP28,HINT1,OTUD4,SENP5,COPS8,TOR1A,USP9X,OTULIN	1.47238	0.379337	40	74
HEPARAN SULFATE HEPARIN (HS-GAG) METABOLISM%REACTOME DATABASE ID RELEASE 77%1638091	HEPARAN SULFATE HEPARIN (HS-GAG) METABOLISM%REACTOME DATABASE ID RELEASE 77%1638091	0.0155346	0.0850396	-1	HSPG2,GPC1,BGN,AGRN,CSPG4,DCN,HS3ST3B1,VCAN,SDC3,HS3ST1,GPC3	-1.58276	-0.531908	11	30
RESPONSE TO WOUNDING%GOBP%GO:0009611	RESPONSE TO WOUNDING%GOBP%GO:0009611	0.0156338	0.0854633	-1	STXBP1,PPL,DSP,FOLR1,ANO6,GNAQ,PLAUR,GNA12,ADAM17,STXBP3,COL5A1,CD9,MYOF,PLEC,CD44,FN1,GNAS,FGFR1OP2,P2RX4,TNC,PAK1,GGCX,PDGFB,LMAN1,CD59,CSRP1,ERBB3,AXL,FGG,FLRT3,RHOA,F13A1,NOG,FGF2,RAC1,CD36,SRC,RAP2B,TGFBR1	-1.42319	-0.374154	39	121
MESENCHYMAL CELL DEVELOPMENT%GOBP%GO:0014031	MESENCHYMAL CELL DEVELOPMENT%GOBP%GO:0014031	0.0156947	0.0856769	-1	FOLR1,HEY2,TCOF1,FN1,SEMA4B,NRP1,SEMA4D,HAND2,SEMA3C,NOLC1,TAPT1,SEMA4C,RADIL	-1.57856	-0.527362	13	31
FSH%NETPATH%FSH	FSH%NETPATH%FSH	0.015748	0.0858486	1	PRKAR1A,TSC2,RAF1,MAPK1,FOXO1,APPL1,RPS6KA3,MTOR,FYN,RPS6,FOXO3,MAPK14	1.62251	0.544298	12	22
EPITHELIAL CELL DIFFERENTIATION%GOBP%GO:0030855	EPITHELIAL CELL DIFFERENTIATION%GOBP%GO:0030855	0.0160413	0.087326	-1	PCK2,MARVELD2,STC1,POF1B,F11R,ICAM1,DSP,SLC4A7,RAB13,SLC9A3R1,ERCC2,PODXL,TJP1,HEY2,RAP2C,IQGAP1,JAG2,PIP5K1A,NRP1,WNT11,HDAC1,PDGFB,TST,MYO6,RAP1B,MAGI2,CTNNB1,TAGLN2,IRF6,RHOA,RAB10,ADAM9,RDX,CDK6,RAP1A,RBPJ,RAPGEF6,SRC,RAP2B	-1.40217	-0.36352	39	135
AXONAL TRANSPORT%GOBP%GO:0098930	AXONAL TRANSPORT%GOBP%GO:0098930	0.016158	0.0878395	1	TRAK1,HSPB1,DYNC1H1,ACTR10,AP3S2,AP3D1,AP3B1,NEFL,DCTN1,KIF1C,MAPK8IP3,PAFAH1B1,KIF1B,BLOC1S4,AP3S1	1.56013	0.468528	15	35
TP53 REGULATES METABOLIC GENES%REACTOME%R-HSA-5628897.4	TP53 REGULATES METABOLIC GENES%REACTOME%R-HSA-5628897.4	0.0162434	0.0881814	1	COX16,PTEN,RRAGC,TSC2,SURF1,TIGAR,AGO4,RRAGA,LRPPRC,YWHAB,PRDX2,LAMTOR3,AGO2,RPTOR,LAMTOR1,SCO2,MTOR,TXNRD1,COX14,SCO1,AKT3,GPI,TXN,YWHAE,TNRC6A	1.47434	0.383969	25	70
POSITIVE REGULATION OF CELL JUNCTION ASSEMBLY%GOBP%GO:1901890	POSITIVE REGULATION OF CELL JUNCTION ASSEMBLY%GOBP%GO:1901890	0.0163017	0.0883757	-1	THY1,EPHB2,AGRN,SRPX2,SFRP1,NRP1,SEMA4D,FLOT1,LRRC4B,S100A10,RAC1,CAV1,AGT	-1.56984	-0.520403	13	32
PID_IL2_PI3K_PATHWAY%MSIGDB_C2%PID_IL2_PI3K_PATHWAY	PID_IL2_PI3K_PATHWAY%MSIGDB_C2%PID_IL2_PI3K_PATHWAY	0.0164769	0.0892023	1	PIK3R1,PIK3CA,PTPN11,SMPD1,BCL2L1,NFKB1,SHC1,EIF3A,MTOR,SOS1,RPS6,FOXO3,SGMS1	1.63612	0.571244	13	19
PROTEIN K63-LINKED UBIQUITINATION%GOBP%GO:0070534	PROTEIN K63-LINKED UBIQUITINATION%GOBP%GO:0070534	0.0165829	0.0896528	1	TRIM5,RNF115,UBE2N,UBE2S,TRAF6,UBE2G1,HECTD1,WWP2,ITCH,ARIH2,TRAF3,UBE2O,UBE2V1	1.58329	0.499892	13	28
HALLMARK_G2M_CHECKPOINT%MSIGDB_C2%HALLMARK_G2M_CHECKPOINT	HALLMARK_G2M_CHECKPOINT%MSIGDB_C2%HALLMARK_G2M_CHECKPOINT	0.017089	0.0922617	-1	SS18,HMGA1,NUMA1,NCL,NASP,LIG3,MARCKS,NOLC1,PDS5B,PML,CBX1,LBR,BIRC5,SMC1A,RPS6KA5,EWSR1,MCM2,HIRA,CDKN1B,HMGN2,TOP2A,ILF3,MCM6,HIST1H2BK,PLK1,WRN,NUP98,SMARCC1,TGFB1,TFDP1,SFPQ,CKS2,PRPF4B,UBE2C,RAD21,CTCF,DDX39A,SLC12A2,MKI67	-1.4578	-0.401202	39	89
RAB GEFS EXCHANGE GTP FOR GDP ON RABS%REACTOME%R-HSA-8876198.3	RAB GEFS EXCHANGE GTP FOR GDP ON RABS%REACTOME%R-HSA-8876198.3	0.0171686	0.0925642	1	DENND1B,DENND5A,RAB3GAP1,TRAPPC3,RAB3GAP2,RAB9B,ALS2,TRAPPC1,RABGEF1,DENND5B,TRAPPC13,DENND4C,DENND6A,TRAPPC9,DENND4A,GDI2,TRAPPC12,TRAPPC11,GDI1	1.49132	0.402284	19	58
NUCLEAR ENVELOPE BREAKDOWN%REACTOME DATABASE ID RELEASE 77%2980766	NUCLEAR ENVELOPE BREAKDOWN%REACTOME DATABASE ID RELEASE 77%2980766	0.0172911	0.0930966	-1	NUP85,AAAS,TPR,NUP35,NUP62,NUP153,NUP54,NUP50,NUP155,RANBP2,VRK1,RAE1,PLK1,NUP88,LPIN3,NUP160,LEMD3,NUP210,NUP107,NDC1	-1.5642	-0.495711	20	39
REGULATION OF FIBROBLAST PROLIFERATION%GOBP%GO:0048145	REGULATION OF FIBROBLAST PROLIFERATION%GOBP%GO:0048145	0.0173182	0.0931148	-1	FN1,SFRP1,S100A6,PDGFB,CTNNB1,PDGFC,CDK6,GAS6,AGT,BMI1,CDC73,AQP1,TP53,MORC3,NDUFS4,WNT5A	-1.57595	-0.532327	16	29
REGULATION OF AUTOPHAGY OF MITOCHONDRION%GOBP%GO:1903146	REGULATION OF AUTOPHAGY OF MITOCHONDRION%GOBP%GO:1903146	0.0174461	0.0936743	1	DNM1L,ATP13A2,PARK7,TSC2,VDAC1,VPS13D,SLC25A5,SLC25A4,VPS13C,HTRA2	1.61925	0.565357	10	19
PROTEIN DEUBIQUITINATION%GOBP%GO:0016579	PROTEIN DEUBIQUITINATION%GOBP%GO:0016579	0.0174894	0.0937787	1	OTUB1,USP5,USP33,USP15,USP25,EIF3F,VCPIP1,USP4,USP24,OTUD7B,USP47,SENP8,USP16,COPS5,UCHL1,ATXN3,USP30,USP19,USP13,UCHL3,USP10,ZC3H12A,TRRAP,USP8,SPATA2,CDK1	1.48794	0.400053	26	59
POTASSIUM ION IMPORT ACROSS PLASMA MEMBRANE%GOBP%GO:1990573	POTASSIUM ION IMPORT ACROSS PLASMA MEMBRANE%GOBP%GO:1990573	0.0175897	0.0940593	-1	ATP1A2,ATP1B1,ATP1A1,ATP1B2,ATP1B3,KCNJ8	-1.62472	-0.637887	6	15
ADENYLATE CYCLASE-ACTIVATING G PROTEIN-COUPLED RECEPTOR SIGNALING PATHWAY%GOBP%GO:0007189	ADENYLATE CYCLASE-ACTIVATING G PROTEIN-COUPLED RECEPTOR SIGNALING PATHWAY%GOBP%GO:0007189	0.0175897	0.0940593	-1	ADRA2B,GNAQ,ADCY9,LPAR2,GNB1,GNAS,S1PR1	-1.62435	-0.637744	7	15
REGULATION OF SECRETION BY CELL%GOBP%GO:1903530	REGULATION OF SECRETION BY CELL%GOBP%GO:1903530	0.0176266	0.0941287	-1	TRH,ADRA2B,VAMP8,RAB27A,STXBP2,STXBP1,SLC4A8,RAB11FIP1,STXBP3,STX1B,RAB13,C2CD2L,LLGL2,CYP51A1,NMB,LYN,P2RX4,SFRP1,CD2AP,MYOM1,SNAP25,RAP1B,RAB8B,TTN,FGG,TMED10,RHBDF1,RAB10,ADAM9,RAP1A,VAMP7,ARF6,SDCBP,STX4,AGT,ACSL4,RAB8A	-1.39245	-0.359328	37	141
VASCULAR PROCESS IN CIRCULATORY SYSTEM%GOBP%GO:0003018	VASCULAR PROCESS IN CIRCULATORY SYSTEM%GOBP%GO:0003018	0.0177018	0.0943972	-1	ATP1A2,ATP2B1,YES1,SLC4A8,CPS1,OCLN,ATP1B2,SLC2A3,SLC2A1,LRP1,SLC9A3R1,TJP1,PIK3C2A,SLC1A5,SLC16A7,FGG,KCNJ8,ATP2B4,SLC1A4,SCPEP1,CD36,SRC,CAV1,AGT,ITGB1BP1,SLC1A3,TFRC	-1.47455	-0.415812	27	76
CELL-CELL COMMUNICATION%REACTOME DATABASE ID RELEASE 77%1500931	CELL-CELL COMMUNICATION%REACTOME DATABASE ID RELEASE 77%1500931	0.017725	0.0943972	-1	CADM1,F11R,LAMC2,LAMB3,LAMA3,ITGA6,JUP,CDH1,CLDN6,PLEC,CTNNA1,SIRPA,IQGAP1,CD2AP,SDK2,MAGI2,CTNNB1	-1.50831	-0.440276	17	61
PROTEIN LOCALIZATION TO MITOCHONDRION%GOBP%GO:0070585	PROTEIN LOCALIZATION TO MITOCHONDRION%GOBP%GO:0070585	0.0177644	0.0944788	1	TIMM17A,MFN2,CHCHD4,TIMM8B,TIMM13,HSP90AA1,TOMM34,MOAP1,TIMM50,DNAJA1,TOMM7,ISG15,TIMM23,MIPEP,HK1,TOMM22,MFF,TIMM17B,TOMM40,TIMM44,DNLZ,TIMM10B,FIS1,ROMO1,SAMM50,BCS1L	1.50884	0.411222	26	54
PEROXISOMAL PROTEIN IMPORT%REACTOME%R-HSA-9033241.3	PEROXISOMAL PROTEIN IMPORT%REACTOME%R-HSA-9033241.3	0.0178381	0.0946263	1	ACAA1,ACOX3,ZFAND6,UBE2D3,ACOT8,UBE2D1,PEX12,AGPS,PEX6,ACOX1,LONP2,CAT,IDE,GSTK1,UBA52,PEX10,HACL1,DDO,HSD17B4,PEX14	1.53838	0.452327	20	39
BIOCARTA_VEGF_PATHWAY%MSIGDB_C2%BIOCARTA_VEGF_PATHWAY	BIOCARTA_VEGF_PATHWAY%MSIGDB_C2%BIOCARTA_VEGF_PATHWAY	0.0178404	0.0946263	1	PIK3R1,PIK3CA,EIF2B3,EIF2S2,EIF2S1,PRKCA,EIF2B5,SHC1	1.62933	0.606016	8	15
AUTOPHAGOSOME ASSEMBLY%GOBP%GO:0000045	AUTOPHAGOSOME ASSEMBLY%GOBP%GO:0000045	0.0179528	0.0950943	1	MAP1LC3B,ATG101,MFN2,RB1CC1,ATG5,WIPI1,ATG16L1,WDR45,ATG14,ATG7,ATG9A,GABARAPL2,NSFL1C,TRAPPC8,ATG12,ATP2A2,EMC6	1.53718	0.449319	17	40
NUCLEAR PORE COMPLEX (NPC) DISASSEMBLY%REACTOME%R-HSA-3301854.2	NUCLEAR PORE COMPLEX (NPC) DISASSEMBLY%REACTOME%R-HSA-3301854.2	0.0181428	0.0959712	-1	NUP85,AAAS,TPR,NUP35,NUP62,NUP153,NUP54,NUP50,NUP155,RANBP2,RAE1,NUP88,NUP160,NUP210,NUP107,NDC1	-1.56879	-0.529907	16	29
INTERACTIONS OF VPR WITH HOST CELLULAR PROTEINS%REACTOME%R-HSA-176033.2	INTERACTIONS OF VPR WITH HOST CELLULAR PROTEINS%REACTOME%R-HSA-176033.2	0.0182776	0.0963178	-1	PSIP1,HMGA1,NUP85,AAAS,TPR,NUP35,NUP62,NUP153,NUP54,NUP50,NUP155,RANBP2,RAE1	-1.55443	-0.515294	13	32
HEDGEHOG 'OFF' STATE%REACTOME DATABASE ID RELEASE 77%5610787	HEDGEHOG 'OFF' STATE%REACTOME DATABASE ID RELEASE 77%5610787	0.0182945	0.0963178	1	PSME4,PRKAR1A,OFD1,PSMF1,TTC21B,ITCH,PSMD9,PSME3,PSMD5,PSMA5,PSMB6,GSK3B,PSMD4,PSMA1,PSMA7,IFT57,PSMB3,PSMB4,UBA52,IFT140,PRKACA,PSMA6,WDR19	1.44763	0.378708	23	69
OPIOID SIGNALLING%REACTOME%R-HSA-111885.2	OPIOID SIGNALLING%REACTOME%R-HSA-111885.2	0.0183081	0.0963178	-1	GNG5,AHCYL1,GNB4,ITPR1,GNAQ,ADCY9,GNAI3,ITPR3,GNB1,GNAI2,GNB2,CAMK2B,PRKCD,PPP1R1B,GNA14	-1.53963	-0.465828	15	50
ATP METABOLIC PROCESS%GOBP%GO:0046034	ATP METABOLIC PROCESS%GOBP%GO:0046034	0.0183119	0.0963178	-1	MYH6,ATP1A2,ATP1B1,HK2,SDHA,ENO2,AK4,MYH8,MYH3,PARP1,NDUFS1,PFKL,ENO1,STOML2,COX7C,NDUFV2,LDHA,NDUFS6,NDUFA5,FOXK2,NDUFV3,NDUFA12,NDUFA2,ALDOC	-1.4222	-0.378436	24	111
ORC1 REMOVAL FROM CHROMATIN%REACTOME DATABASE ID RELEASE 77%68949	ORC1 REMOVAL FROM CHROMATIN%REACTOME DATABASE ID RELEASE 77%68949	0.0183311	0.0963178	1	PSME4,PSMF1,PSMD9,PSME3,PSMD5,PSMA5,PSMB6,PSMD4,PSMA1,PSMA7,PSMB3,PSMB4,UBA52,PSMA6,CDK2,PSMD11,ORC5	1.50663	0.408965	17	55
NOD1 2 SIGNALING PATHWAY%REACTOME DATABASE ID RELEASE 77%168638	NOD1 2 SIGNALING PATHWAY%REACTOME DATABASE ID RELEASE 77%168638	0.018638	0.0977996	1	UBE2N,AAMP,TRAF6,IRAK1,ITCH,CASP9,IKBKB,TAB2,UBE2V1,MAPK14	1.61831	0.582154	10	17
PID_P53_REGULATION_PATHWAY%MSIGDB_C2%PID_P53_REGULATION_PATHWAY	PID_P53_REGULATION_PATHWAY%MSIGDB_C2%PID_P53_REGULATION_PATHWAY	0.0186701	0.0978372	1	DYRK2,SETD7,PIN1,SMYD2,RCHY1,UBE2D1,RPL23,RPL11,RFWD2,GSK3B,E4F1,MAPK14,HUWE1,CREBBP,NEDD8,CSNK1E,MAPK9,CDK2,PPP2CA,HIPK2,CSNK1G1	1.53697	0.457287	21	36
PID_AMB2_NEUTROPHILS_PATHWAY%MSIGDB_C2%PID_AMB2_NEUTROPHILS_PATHWAY	PID_AMB2_NEUTROPHILS_PATHWAY%MSIGDB_C2%PID_AMB2_NEUTROPHILS_PATHWAY	0.0187382	0.0980631	-1	THY1,YES1,PLAUR,LYN,MMP2,RAP1A,JAM3,SRC,PLAT,MYH2	-1.61151	-0.61479	10	17
MATURATION OF SPIKE PROTEIN%REACTOME DATABASE ID RELEASE 77%9694548	MATURATION OF SPIKE PROTEIN%REACTOME DATABASE ID RELEASE 77%9694548	0.0188616	0.0985774	-1	MGAT1,MGAT4C,ST3GAL4,FUT8,ST3GAL1,MGAT5,CANX,MGAT4B,PRKCSH,ST3GAL2,GANAB,MOGS,RPN1	-1.57383	-0.555141	13	24
NEGATIVE REGULATION OF CELLULAR COMPONENT MOVEMENT%GOBP%GO:0051271	NEGATIVE REGULATION OF CELLULAR COMPONENT MOVEMENT%GOBP%GO:0051271	0.0189447	0.0988803	-1	STC1,THY1,BMP10,RECK,PODN,ENG,ATP1B2,JUP,CDH1,SP100,CD9,LRP1,RAP2C,DCN,ZMYND8,SFRP1,BST2,WNT11,EMILIN1,ADAMTS9,MECP2,MAGI2,IGFBP5,THBS1,CHRD,KRIT1,ATP2B4,RHOA,NOG,FGF2,RAC1,SERPINE1,RAP2B,IGFBP3,DAG1,ITGB1BP1,CERS2	-1.40389	-0.367272	37	125
COOPERATION OF PDCL (PHLP1) AND TRIC CCT IN G-PROTEIN BETA FOLDING%REACTOME%R-HSA-6814122.2	COOPERATION OF PDCL (PHLP1) AND TRIC CCT IN G-PROTEIN BETA FOLDING%REACTOME%R-HSA-6814122.2	0.0189766	0.0989153	-1	GNG5,GNB4,GNAQ,GNB1,GNB2,GNA14,GNA11	-1.60081	-0.58876	7	20
POSITIVE REGULATION OF CALCIUM ION TRANSMEMBRANE TRANSPORT%GOBP%GO:1904427	POSITIVE REGULATION OF CALCIUM ION TRANSMEMBRANE TRANSPORT%GOBP%GO:1904427	0.0192081	0.099989	-1	THY1,CACNB2,ATP1B1,SLC9A1,CACNB3	-1.57071	-0.558932	5	23
SPROUTING ANGIOGENESIS%GOBP%GO:0002040	SPROUTING ANGIOGENESIS%GOBP%GO:0002040	0.0193668	0.100682	-1	RECK,ENG,LOXL2,BMPER,NRP1,RNF213,THBS1,FGF2,ITGB1BP1	-1.58381	-0.568274	9	22
MACROMOLECULE GLYCOSYLATION%GOBP%GO:0043413	MACROMOLECULE GLYCOSYLATION%GOBP%GO:0043413	0.0195086	0.100916	-1	PLOD2,MGAT1,NUDT14,MGAT4C,DPY19L1,ALG2,B4GALT1,ST3GAL4,PLOD1,TMTC3,GXYLT1,PLOD3,B4GAT1,COG3,GXYLT2,FUT8,POFUT1,ST3GAL1,POMGNT2,UGGT2,ALG5,UGGT1,GFPT2,MGAT5,MGAT4B	-1.45303	-0.405096	25	81
EXOCYTOSIS%GOBP%GO:0006887	EXOCYTOSIS%GOBP%GO:0006887	0.0195086	0.100916	-1	VAMP8,RAB27A,STXBP2,STXBP1,EXOC3L2,RAB11FIP1,STXBP3,STX1B,STX3,RAB13,SDF4,STX17,LYN,PIK3C2A,PIP5K1C,STX2,SNAP25	-1.45303	-0.405095	17	81
PROTEIN GLYCOSYLATION%GOBP%GO:0006486	PROTEIN GLYCOSYLATION%GOBP%GO:0006486	0.0195086	0.100916	-1	PLOD2,MGAT1,NUDT14,MGAT4C,DPY19L1,ALG2,B4GALT1,ST3GAL4,PLOD1,TMTC3,GXYLT1,PLOD3,B4GAT1,COG3,GXYLT2,FUT8,POFUT1,ST3GAL1,POMGNT2,UGGT2,ALG5,UGGT1,GFPT2,MGAT5,MGAT4B	-1.45303	-0.405096	25	81
RNA SPLICING%GOBP%GO:0008380	RNA SPLICING%GOBP%GO:0008380	0.0195147	0.100916	-1	CWF19L1,PSIP1,DDX41,RNPS1,SRSF9,SF1,PQBP1,RBM17,ZCCHC8,WBP11,LSM2,SRSF4,HNRNPU,CWC15,PRPF40B,SART3,SNRPA,LSM4,DCPS,CDK12,PPIE,SCAF11,HNRNPR,COIL,CACTIN,PRPF8,SNRPB2,CWC27,SNW1,LSM7,MFAP1,ISY1,KHSRP,CDC5L,SNRPN,ZCRB1,PRPF19,DDX46,SNRPA1,SRRM1,RBM22,RBM19,PPP1R9B,PPWD1,HNRNPA3,WBP4,CCAR2,PPIG,PRPF40A,SF3B6,SNRPC,SF3B2,PRPF4,PRPF31,SF3B3,SF3A2,SNRNP40,IK,TGS1,CRNKL1,GEMIN7,SFPQ,HNRNPC,PNN,LSM6,TARDB…	-1.32463	-0.324316	125	224
INTRA-GOLGI AND RETROGRADE GOLGI-TO-ER TRAFFIC%REACTOME DATABASE ID RELEASE 77%6811442	INTRA-GOLGI AND RETROGRADE GOLGI-TO-ER TRAFFIC%REACTOME DATABASE ID RELEASE 77%6811442	0.0197152	0.101819	1	BICD2,CYTH2,NAA30,RAB3GAP1,RAB3GAP2,GOSR2,RAB9B,KIF21A,NAPB,PAFAH1B2,DYNC1H1,ACTR10,PAFAH1B3,DCTN5,KLC1,ARFGAP2,VPS51,DYNC1I1,COG1,YKT6,ACTR1A,COG8,CAPZA2,COG4,COPG1,DCTN4,CYTH1,DCTN1,KIF1C,NAPA,PAFAH1B1,KIF1B,SEC22B,VPS53,NAA35,ARCN1,GOSR1,BICD1,DYNC1I2,GBF1,DYNC1LI1,KIF5B,KLC4,RAB6A,PLIN3,CUX1,TRIP11,COG7,GOLGA1,KIF2C,DCTN3,BET1L	1.34645	0.311948	52	145
SIGNAL TRANSDUCTION IN RESPONSE TO DNA DAMAGE%GOBP%GO:0042770	SIGNAL TRANSDUCTION IN RESPONSE TO DNA DAMAGE%GOBP%GO:0042770	0.0201582	0.103853	-1	TAOK3,ATF2,CHEK2,SP100,TRIAP1,NDRG1,MDC1,WAC,TP53BP1,MYO6,MAD2L2,PML,CDKN1B,CDC5L,ERCC6,PRPF19,RPA2,TP53,ING4,PLK1	-1.50075	-0.442308	20	58
VENTRICULAR CARDIAC MUSCLE TISSUE DEVELOPMENT%GOBP%GO:0003229	VENTRICULAR CARDIAC MUSCLE TISSUE DEVELOPMENT%GOBP%GO:0003229	0.020162	0.103853	-1	MYH6,DSG2,BMP10,DSP,ENG,NKX2-5,ADAMTS9,MYBPC3,NOG,RBPJ,MYL3,TGFBR1,TNNC1,PKP2,MYH7,TGFB1,RYR2,TPM1	-1.55741	-0.52339	18	30
APICAL JUNCTION ASSEMBLY%GOBP%GO:0043297	APICAL JUNCTION ASSEMBLY%GOBP%GO:0043297	0.0202088	0.103958	-1	MARVELD2,POF1B,OCLN,RAB13,CLDN6,DLG1,CTNNA1,MPP7,RHOA	-1.57721	-0.565906	9	22
DDX58 IFIH1-MEDIATED INDUCTION OF INTERFERON-ALPHA BETA%REACTOME%R-HSA-168928.9	DDX58 IFIH1-MEDIATED INDUCTION OF INTERFERON-ALPHA BETA%REACTOME%R-HSA-168928.9	0.0203699	0.104649	1	PIN1,TAX1BP1,ATG5,UBE2D3,TRAF6,UBE2D1,HSP90AA1,ITCH,NKIRAS2,NFKB1,TRAF3,IKBKB,ISG15,NKIRAS1,HSP90AB1,UBE2K,PCBP2,UBA52,ATG12,CREBBP	1.53321	0.446097	20	41
REGULATION OF STRIATED MUSCLE CONTRACTION%GOBP%GO:0006942	REGULATION OF STRIATED MUSCLE CONTRACTION%GOBP%GO:0006942	0.0205144	0.105117	-1	DSG2,STC1,BMP10,ATP1A2,DSC2,ATP1B1,SLC9A1,DSP,CTNNA3,JUP,FGF13,DLG1,P2RX4,NKX2-5,CACNA1C,MYBPC3,KCNQ1,FKBP1B	-1.51428	-0.45596	18	52
REGULATION OF PROTEOLYSIS INVOLVED IN CELLULAR PROTEIN CATABOLIC PROCESS%GOBP%GO:1903050	REGULATION OF PROTEOLYSIS INVOLVED IN CELLULAR PROTEIN CATABOLIC PROCESS%GOBP%GO:1903050	0.0205146	0.105117	1	OPHN1,GLMN,RNF14,COMMD1,PARK7,RCHY1,PTEN,NUB1,SIRT2,PRICKLE1,PSMF1,GIPC1,HECTD1,ARAF,GBA,RPL23,ARIH1,BAG6,USP5,PSME3,ARIH2,RPL11,NUDT15,VCP,OGT,USP25,UBXN1,ZYG11B,CCDC22,GSK3B,HSPBP1,KEAP1,HSP90AB1,RPS7,GABARAPL2,EIF3H,ATXN3,USP19,USP13,GPX1,BAG2	1.36759	0.323263	41	125
HYPOXIA RESPONSE VIA HIF ACTIVATION%PANTHER PATHWAY%P00030	HYPOXIA RESPONSE VIA HIF ACTIVATION%PANTHER PATHWAY%P00030	0.020553	0.105177	1	PTEN,PTEN,PTEN,PTEN,MTOR,MTOR,AKT3,AKT3,TXN,TXN,CREBBP,CREBBP	1.59917	0.54318	12	21
VENTRICULAR CARDIAC MUSCLE TISSUE MORPHOGENESIS%GOBP%GO:0055010	VENTRICULAR CARDIAC MUSCLE TISSUE MORPHOGENESIS%GOBP%GO:0055010	0.0207159	0.105872	-1	MYH6,BMP10,DSP,ENG,NKX2-5,MYBPC3,NOG,RBPJ,MYL3,TGFBR1,TNNC1,PKP2,MYH7,TGFB1,RYR2,TPM1	-1.55898	-0.534647	16	27
REGULATION OF REGULATED SECRETORY PATHWAY%GOBP%GO:1903305	REGULATION OF REGULATED SECRETORY PATHWAY%GOBP%GO:1903305	0.0207818	0.106071	-1	VAMP8,RAB27A,STXBP2,STXBP1,SLC4A8,STXBP3,LYN,RAP1B,RAP1A,VAMP7,STX4	-1.55831	-0.526369	11	29
PI3K CASCADE%REACTOME DATABASE ID RELEASE 77%109704	PI3K CASCADE%REACTOME DATABASE ID RELEASE 77%109704	0.020892	0.106495	1	FGF1,PIK3R1,PIK3CA,PTPN11	1.60952	0.598646	4	15
CELLULAR HOMEOSTASIS%GOBP%GO:0019725	CELLULAR HOMEOSTASIS%GOBP%GO:0019725	0.0209772	0.106791	-1	TXNRD2,PCK2,STC1,THY1,CYBRD1,ATP1A2,ATP2B1,ATP1B1,ATP1A1,SLC4A8,HK2,SLC9A1,ATP1B2,ANO6,SLC4A7,ITPR1,SLC39A10,WFS1,SLC39A6,CD55,TCIRG1,LPAR2,PDK3,CACNB3,ITPR3,ATP7A,P2RX4,CHERP,CACNA1C,ATP1B3,STOML2,PML,STC2,NPTN,KRIT1,ATP2B4,FKBP1B,VAPB,SLC25A23,ABCB6,CACNA2D1,CA2,ISCU,HRC,FOXK2,HSP90B1,FGF2,JPH1,GAS6,CD36,ATP6V1A,CHP1,CAV1,S100A8,PDZD8,PPT1,TFRC,PRDX4,CAPN3	-1.31566	-0.32133	59	230
PID_P75_NTR_PATHWAY%MSIGDB_C2%PID_P75_NTR_PATHWAY	PID_P75_NTR_PATHWAY%MSIGDB_C2%PID_P75_NTR_PATHWAY	0.021125	0.107403	1	PIK3R1,PIK3CA,TRAF6,SQSTM1,DIABLO,IRAK1,NDN,CASP9,CASP3,SORT1,SHC1,NGFR,IKBKB,BAD	1.54663	0.47434	14	32
ADAPTIVE IMMUNE RESPONSE BASED ON SOMATIC RECOMBINATION OF IMMUNE RECEPTORS BUILT FROM IMMUNOGLOBULIN SUPERFAMILY DOMAINS%GOBP%GO:0002460	ADAPTIVE IMMUNE RESPONSE BASED ON SOMATIC RECOMBINATION OF IMMUNE RECEPTORS BUILT FROM IMMUNOGLOBULIN SUPERFAMILY DOMAINS%GOBP%GO:0002460	0.0212193	0.107728	-1	CADM1,ADAM17,CD55,PHB,GNL1,HLA-A	-1.57073	-0.563582	6	22
POSITIVE REGULATION OF PROTEIN MODIFICATION BY SMALL PROTEIN CONJUGATION OR REMOVAL%GOBP%GO:1903322	POSITIVE REGULATION OF PROTEIN MODIFICATION BY SMALL PROTEIN CONJUGATION OR REMOVAL%GOBP%GO:1903322	0.0212452	0.107728	1	PTTG1IP,PIN1,COMMD1,UBE2N,RCHY1,DCUN1D2,PTEN,UBE2S,PRICKLE1,PDCD6,TRAF6,UBE2D1,AMER1,PEF1,RPS2	1.43642	0.375774	15	69
AXON GUIDANCE MEDIATED BY NETRIN%PANTHER PATHWAY%P00009	AXON GUIDANCE MEDIATED BY NETRIN%PANTHER PATHWAY%P00009	0.0212712	0.107728	1	NTN1,NTN1,PIK3R1,PIK3R1,PIK3CA,PIK3CA,VASP,VASP	1.5497	0.478541	8	31
INNER MITOCHONDRIAL MEMBRANE ORGANIZATION%GOBP%GO:0007007	INNER MITOCHONDRIAL MEMBRANE ORGANIZATION%GOBP%GO:0007007	0.0213193	0.107833	1	APOOL,UQCC3,TIMM8B,TIMM13,TMEM11,HSPA9,APOO,CHCHD3,TIMM10B,ROMO1,SAMM50,CHCHD6	1.55333	0.499762	12	26
INTRACELLULAR PROTEIN TRANSPORT%GOBP%GO:0006886	INTRACELLULAR PROTEIN TRANSPORT%GOBP%GO:0006886	0.0213806	0.108004	1	RANBP6,RILPL1,TIMM17A,RABGAP1L,TNPO1,KPNA2,PTTG1IP,HSPA8,VPS35,TBC1D17,HOMER3,TRAK1,MFN2,KATNB1,AKAP6,XPO4,RAB3GAP2,VPS26B,SEC31A,TSC2,HERC2,WLS,ZFAND6,RABGEF1,PRICKLE1,SNX15,PDCD6,NAPB,TBC1D4,TBC1D8,CHCHD4,KPNA1,TIMM8B,GIPC1,HSPB1,TIMM13,HSP90AA1,IPO5,PEX12,IPO9,RPL23,SNX17,VPS37C,IPO13,ZFAND2B,TOMM34,AP3D1,RPL11,EHD1,NCOA4,IPO8,STRADA,PEX6,APPL1,MOAP1,TIMM50,STX11,TBC1D10A,PICK1,VPS4A,VPS36,IPO…	1.21085	0.252159	94	370
LEUKOCYTE ACTIVATION INVOLVED IN IMMUNE RESPONSE%GOBP%GO:0002366	LEUKOCYTE ACTIVATION INVOLVED IN IMMUNE RESPONSE%GOBP%GO:0002366	0.0214215	0.108012	-1	VAMP8,STXBP2,ICAM1,STXBP3,DOCK11,ATP7A,IFNA8,VAMP7,SNAP23	-1.54771	-0.527183	9	28
POSITIVE REGULATION OF ION TRANSMEMBRANE TRANSPORT%GOBP%GO:0034767	POSITIVE REGULATION OF ION TRANSMEMBRANE TRANSPORT%GOBP%GO:0034767	0.021441	0.108012	-1	THY1,CACNB2,TESC,ATP1B1,SLC9A1,ATP1B2,FXYD1,ANO6,EPHB2,CACNB3,ANK3,WNK2,ATP1B3,NOS1AP	-1.50746	-0.451549	14	54
UBIQUITIN MEDIATED DEGRADATION OF PHOSPHORYLATED CDC25A%REACTOME%R-HSA-69601.3	UBIQUITIN MEDIATED DEGRADATION OF PHOSPHORYLATED CDC25A%REACTOME%R-HSA-69601.3	0.0215401	0.108012	1	PSME4,PSMF1,PSMD9,PSME3,PSMD5,PSMA5,PSMB6,PSMD4,PSMA1,PSMA7,PSMB3,PSMB4,UBA52,PSMA6,PSMD11	1.52104	0.437308	15	43
P53-INDEPENDENT G1 S DNA DAMAGE CHECKPOINT%REACTOME%R-HSA-69613.2	P53-INDEPENDENT G1 S DNA DAMAGE CHECKPOINT%REACTOME%R-HSA-69613.2	0.0215401	0.108012	1	PSME4,PSMF1,PSMD9,PSME3,PSMD5,PSMA5,PSMB6,PSMD4,PSMA1,PSMA7,PSMB3,PSMB4,UBA52,PSMA6,PSMD11	1.52104	0.437308	15	43
P53-INDEPENDENT DNA DAMAGE RESPONSE%REACTOME%R-HSA-69610.4	P53-INDEPENDENT DNA DAMAGE RESPONSE%REACTOME%R-HSA-69610.4	0.0215401	0.108012	1	PSME4,PSMF1,PSMD9,PSME3,PSMD5,PSMA5,PSMB6,PSMD4,PSMA1,PSMA7,PSMB3,PSMB4,UBA52,PSMA6,PSMD11	1.52104	0.437308	15	43
RESPONSE TO ALCOHOL%GOBP%GO:0097305	RESPONSE TO ALCOHOL%GOBP%GO:0097305	0.0215791	0.108012	-1	JUP,CDH1,SDF4,CTNNA1,GNB1,SFRP1,CTNNB1,TGFBR1,GNAI1,GOLPH3,TGFB1	-1.55658	-0.543541	11	25
LOSS OF PROTEINS REQUIRED FOR INTERPHASE MICROTUBULE ORGANIZATION FROM THE CENTROSOME%REACTOME DATABASE ID RELEASE 77%380284	LOSS OF PROTEINS REQUIRED FOR INTERPHASE MICROTUBULE ORGANIZATION FROM THE CENTROSOME%REACTOME DATABASE ID RELEASE 77%380284	0.0216024	0.108012	1	PCM1,TUBA1A,SSNA1,OFD1,CEP135,TUBB,PPP2R1A,DYNC1H1,TUBB4B,HSP90AA1,CEP131,ACTR1A,PAFAH1B1,CDK5RAP2,YWHAE,PRKACA,CSNK1E,CDK1,DYNC1I2,NDE1,CLASP1,PCNT,DCTN3,MAPRE1,CEP290,PRKAR2B,CNTRL,HAUS5,DCTN2,CEP41,HAUS8,HAUS3	1.48391	0.406354	32	53
LOSS OF NLP FROM MITOTIC CENTROSOMES%REACTOME%R-HSA-380259.1	LOSS OF NLP FROM MITOTIC CENTROSOMES%REACTOME%R-HSA-380259.1	0.0216024	0.108012	1	PCM1,TUBA1A,SSNA1,OFD1,CEP135,TUBB,PPP2R1A,DYNC1H1,TUBB4B,HSP90AA1,CEP131,ACTR1A,PAFAH1B1,CDK5RAP2,YWHAE,PRKACA,CSNK1E,CDK1,DYNC1I2,NDE1,CLASP1,PCNT,DCTN3,MAPRE1,CEP290,PRKAR2B,CNTRL,HAUS5,DCTN2,CEP41,HAUS8,HAUS3	1.48391	0.406354	32	53
SENSORY PERCEPTION OF SOUND%GOBP%GO:0007605	SENSORY PERCEPTION OF SOUND%GOBP%GO:0007605	0.0217464	0.108594	-1	COL2A1,MARVELD2,COL11A2,WFS1,COL1A1,EPS8L2,KCNQ1,BIRC5	-1.55547	-0.543153	8	25
POSITIVE REGULATION OF SMOOTH MUSCLE CELL PROLIFERATION%GOBP%GO:0048661	POSITIVE REGULATION OF SMOOTH MUSCLE CELL PROLIFERATION%GOBP%GO:0048661	0.021809	0.108657	-1	PHB,MMP2,JUN,PDGFB,ADAMTS1,IGFBP5,THBS1,LDLRAP1,FGF2	-1.58147	-0.57424	9	21
POSITIVE REGULATION OF CELL ACTIVATION%GOBP%GO:0050867	POSITIVE REGULATION OF CELL ACTIVATION%GOBP%GO:0050867	0.0218144	0.108657	-1	THY1,VAMP8,YES1,FLOT2,EPHB2,CD55,SIRPA,LYN,MMP14,TP53BP1,MAD2L2,AXL,HLA-A,THBS1,IGF2,ZNF335,NKAP,VAMP7,GAS6,SRC,XRCC6,CAV1,STX4,TFRC,CAPN3	-1.45088	-0.4114	25	73
PROTEIN UBIQUITINATION%REACTOME DATABASE ID RELEASE 77%8852135	PROTEIN UBIQUITINATION%REACTOME DATABASE ID RELEASE 77%8852135	0.0218699	0.108795	1	UBE2H,CDC34,UBE2N,UBE2S,UBE2D3,RRAGA,UBE2G1,UBE2D1,PEX12,USP5,UBE2E1,PCNA,VCP,RNF181,UBE2K,WDR61,UCHL3,UBE2Z,UBA52,UBA1,DERL1,PEX10,PEX14	1.49473	0.413392	23	51
ENDOSOME TO LYSOSOME TRANSPORT%GOBP%GO:0008333	ENDOSOME TO LYSOSOME TRANSPORT%GOBP%GO:0008333	0.0219979	0.109213	1	RILP,HOOK2,TRAK1,CHMP3,SORT1,CLEC16A,SCYL2,VCP,ATG14,AKTIP,KIF13A,UBXN6,VPS33A,VPS39,VPS18,TGFBRAP1,MGRN1,VPS11,VPS4B	1.50601	0.446205	19	37
MONOVALENT INORGANIC CATION HOMEOSTASIS%GOBP%GO:0055067	MONOVALENT INORGANIC CATION HOMEOSTASIS%GOBP%GO:0055067	0.0220096	0.109213	-1	ATP1A2,ATP1B1,ATP1A1,SLC4A8,SLC9A1,ATP1B2,SLC4A7,TCIRG1	-1.53473	-0.483553	8	40
ORGANELLE DISASSEMBLY%GOBP%GO:1903008	ORGANELLE DISASSEMBLY%GOBP%GO:1903008	0.022101	0.109528	1	MAP1LC3B,UFC1,RB1CC1,ATG5,SQSTM1,KLC1,WIPI1,WDR45,MTIF3,VCP,ATG14,ATG7,GOLGA2,ATG9A,MRRF,GABARAPL2,MCTS1,USP30,UFM1,ATG12,DENR,CDK1,UBA5,GBF1,FIS1,ATG3,KIF5B,FUNDC2,PELO,WIPI2	1.48167	0.407585	30	52
CILIUM ASSEMBLY%REACTOME DATABASE ID RELEASE 77%5617833	CILIUM ASSEMBLY%REACTOME DATABASE ID RELEASE 77%5617833	0.0221634	0.109699	1	TNPO1,PCM1,TUBA1A,ARL3,SSNA1,OFD1,CEP135,TUBB,PPP2R1A,DYNC1H1,TUBB4B,HSP90AA1,LZTFL1,TTC21B,CEP131,IFT81,ACTR1A,IFT57,PAFAH1B1,RAB3IP,IFT22,PDE6D,CDK5RAP2,YWHAE,UNC119B,CCT4,IFT140,CCT3,PRKACA,CSNK1E,CCT8,CDK1,DYNC1I2,GBF1,NDE1,WDR19,CLASP1,PCNT,TRIP11,DCTN3,MAPRE1,CEP290,CCT2,PRKAR2B,CNTRL,HAUS5,DCTN2,TCP1,CEP41,HAUS8,DYNC2H1,KIF3B,HAUS3,BBS2,CLUAP1	1.38511	0.335224	55	106
CYCLIN A:CDK2-ASSOCIATED EVENTS AT S PHASE ENTRY%REACTOME DATABASE ID RELEASE 77%69656	CYCLIN A:CDK2-ASSOCIATED EVENTS AT S PHASE ENTRY%REACTOME DATABASE ID RELEASE 77%69656	0.0225108	0.11098	1	PSMF1,CDK4,PSMD9,PSME3,PSMD5,PSMA5,PSMB6,WEE1,PSMD4,CCNE1,PSMA1,LIN37,PSMA7,PSMB3,MAX,PSMB4,AKT3,UBA52,PSMA6,CDK2,PSMD11,CCND1	1.44974	0.382699	22	65
CYCLIN E ASSOCIATED EVENTS DURING G1 S TRANSITION%REACTOME DATABASE ID RELEASE 77%69202	CYCLIN E ASSOCIATED EVENTS DURING G1 S TRANSITION%REACTOME DATABASE ID RELEASE 77%69202	0.0225108	0.11098	1	PSMF1,CDK4,PSMD9,PSME3,PSMD5,PSMA5,PSMB6,WEE1,PSMD4,CCNE1,PSMA1,LIN37,PSMA7,PSMB3,MAX,PSMB4,AKT3,UBA52,PSMA6,CDK2,PSMD11,CCND1	1.44974	0.382699	22	65
POSITIVE REGULATION OF PATHWAY-RESTRICTED SMAD PROTEIN PHOSPHORYLATION%GOBP%GO:0010862	POSITIVE REGULATION OF PATHWAY-RESTRICTED SMAD PROTEIN PHOSPHORYLATION%GOBP%GO:0010862	0.0225294	0.11098	-1	BMP10,ENG,BMP7,GDF15,SDCBP,TGFBR1,LEFTY2,TWSG1,INHBE,GDF6,TGFB1,BMP5	-1.56968	-0.591352	12	18
CANONICAL NF-KAPPAB PATHWAY%PATHWAY INTERACTION DATABASE NCI-NATURE CURATED DATA%CANONICAL NF-KAPPAB PATHWAY	CANONICAL NF-KAPPAB PATHWAY%PATHWAY INTERACTION DATABASE NCI-NATURE CURATED DATA%CANONICAL NF-KAPPAB PATHWAY	0.0225352	0.11098	1	UBE2D3,TRAF6,PRKCA,NFKB1,IKBKB,RAN,MALT1,ERC1	1.5979	0.594326	8	15
REGULATION OF LIPASE ACTIVITY%GOBP%GO:0060191	REGULATION OF LIPASE ACTIVITY%GOBP%GO:0060191	0.0225961	0.11114	-1	GNAQ,LRP1,APOA1,LPAR2,PHB,ANGPTL4,HRAS,FURIN,RHOA,PCSK6,PCSK5,FGF2,GNA13	-1.54567	-0.522098	13	29
CARDIAC VENTRICLE DEVELOPMENT%GOBP%GO:0003231	CARDIAC VENTRICLE DEVELOPMENT%GOBP%GO:0003231	0.0226266	0.111151	-1	MYH6,BMP10,DSP,ENG,HEY2,STRA6,NKX2-5,MYBPC3,TMEM65,ROBO2,NOG,RBPJ,MYL3,TGFBR1,TNNC1,PKP2,TBX20,MYH7,TGFB1,RYR2,TPM1	-1.51742	-0.463863	21	47
CYTOSKELETAL REGULATION BY RHO GTPASE%PANTHER PATHWAY%P00016	CYTOSKELETAL REGULATION BY RHO GTPASE%PANTHER PATHWAY%P00016	0.0226639	0.111195	1	CFL2,CFL2,MYH11,MYH11,TUBB6,TUBB6,TUBB6,MYLK3,VASP,VASP,ARHGAP1,ARHGAP1,CFL1,CFL1,CFL1,PFN1,PFN1,STMN1,STMN1,TUBB,TUBB,TUBB,TUBB4B,TUBB4B,TUBB4B,ARPC1A,ARPC1A,ARPC1A,ACTA2,ACTA2,ACTA2,EVL,WASL,ARPC4,ARPC4,ARPC5,ARPC5	1.34231	0.314893	37	131
DEFENSE RESPONSE%GOBP%GO:0006952	DEFENSE RESPONSE%GOBP%GO:0006952	0.0228172	0.111807	-1	LGALS8,ATP1A2,HSPG2,YES1,F11R,LOXL3,COLEC11,LIAS,ANO6,IFI16,MFHAS1,ADAM17,SP100,TPST1,TCIRG1,CD44,PHB,SIRPA,ADAR,LYN,MOV10,TRIM25,PDE12,BST2,NOD1,DDX58,RAB23,SETD2,SHMT2,GBP1,BNIP3,PRKCD,HLA-A,IFIT5,PML,THBS1,STAT6,PQBP1,PARP4,ZMYND11,JAK1,TRIM27,RAC1,VAMP7,SERPINE1,CD36,AKAP1,SRC,SNAP23,ZNF148,S100A8,MFAP4	-1.33643	-0.333409	52	185
SIGNALING BY NUCLEAR RECEPTORS%REACTOME%R-HSA-9006931.5	SIGNALING BY NUCLEAR RECEPTORS%REACTOME%R-HSA-9006931.5	0.0229178	0.111985	-1	GNG5,NRAS,ATF2,GNB4,GNAI3,PDK3,FKBP5,GNB1,MOV10,MMP2,SP1,GNAI2,HRAS,HDAC1,JUN,KDM4B,GNB2,KDM3A,CRABP1,POLR2I,POLR2D,PDK1,RXRA,RDH11,SMC1A,PDHX,JUND,STAG2,POU2F1,NCOA1,SRC,PTGES3,YY1,CAV1,CDKN1B,GNAI1,KDM1A	-1.37835	-0.358117	37	133
DIVALENT INORGANIC CATION HOMEOSTASIS%GOBP%GO:0072507	DIVALENT INORGANIC CATION HOMEOSTASIS%GOBP%GO:0072507	0.0229226	0.111985	-1	STC1,THY1,ATP1A2,ATP2B1,ATP1B1,ITPR1,SLC39A10,WFS1,SLC39A6,CD55,LPAR2,CACNB3,ITPR3,ANK3,P2RX4,CHERP,CACNA1C,STOML2,PML,STC2,NPTN,ATP2B4,FKBP1B,VAPB,SLC25A23,CACNA2D1,HRC,HSP90B1,FGF2,JPH1,CD36,CNNM4,CAV1,S100A8,PDZD8,CAPN3,ATP2C1,TGM2,PSEN1	-1.4087	-0.375818	39	109
PHOSPHOLIPID DEPHOSPHORYLATION%GOBP%GO:0046839	PHOSPHOLIPID DEPHOSPHORYLATION%GOBP%GO:0046839	0.0229391	0.111985	1	MTMR8,MTMR3,PTEN,SYNJ2,INPP5F,MTMR6,MTMR9	1.60065	0.5758	7	17
'DE NOVO' POSTTRANSLATIONAL PROTEIN FOLDING%GOBP%GO:0051084	'DE NOVO' POSTTRANSLATIONAL PROTEIN FOLDING%GOBP%GO:0051084	0.023075	0.112509	1	DNAJC7,DNAJB5,HSPA8,CHCHD4,DNAJB12,HSPA14,GAK,HSPE1,HSPA9,HSPA2,HSPA6,DNAJB1,HSPA5,ST13,CCT2,ENTPD5	1.5458	0.497339	16	26
TP53 REGULATES TRANSCRIPTION OF DNA REPAIR GENES%REACTOME DATABASE ID RELEASE 77%6796648	TP53 REGULATES TRANSCRIPTION OF DNA REPAIR GENES%REACTOME DATABASE ID RELEASE 77%6796648	0.0231971	0.112917	-1	ATF2,ERCC2,MDC1,JUN,POLR2I,SSRP1,POLR2D,CDK12,ELL,NELFB,SUPT16H,TP53,CCNK,NELFCD,NELFA,FANCI,CDK13,NELFE,CCNT1,MSH2,ATM,CCNT2,POLR2G	-1.5105	-0.458298	23	49
TRNA PROCESSING%GOBP%GO:0008033	TRNA PROCESSING%GOBP%GO:0008033	0.0232163	0.112917	1	RPP25L,THUMPD3,PTCD1,WDR6,TRMU,TRMT1,RPUSD4,TSEN34,OSGEP,TRMT61B,RTCB,TRMT112,RPP38,PUS3,TSEN54,RPP21,TYW1,HSD17B10,MTFMT,THG1L,DDX1,MOCS3,MTO1,ZBTB8OS	1.44586	0.38432	24	62
G-PROTEIN BETA:GAMMA SIGNALLING%REACTOME%R-HSA-397795.3	G-PROTEIN BETA:GAMMA SIGNALLING%REACTOME%R-HSA-397795.3	0.0233368	0.113363	-1	GNG5,GNB4,GNB1,PAK1,GNB2,RHOA	-1.5941	-0.625867	6	15
RESPONSE TO LIPID%GOBP%GO:0033993	RESPONSE TO LIPID%GOBP%GO:0033993	0.0235817	0.114278	-1	GGT3P,PCK2,ATP1A2,TESC,ATP1A1,CPS1,GLDC,LIAS,BMP7,ADAM17,PDK3,PHB,SIRPA,LYN,SFRP1,WNT11,PTK7,SHPK,AXL,CTNNB1,MTDH,KDM3A,THBS1,UBE3A,PDCD4,HNRNPU,RHOA,RXRA,ADAM9,TWF2,CTR9,ALPL,ARID1A,SERPINE1,CD36,SRC,ADNP2,CAV1,CACTIN,TGFBR1,S100A8,SNW1,GNAI1,PABPN1,WNT5B,CDC73,AQP1,TMF1,HNRNPA0,RBFOX2	-1.35641	-0.344439	50	159
CELLULAR RESPONSE TO NUTRIENT LEVELS%GOBP%GO:0031669	CELLULAR RESPONSE TO NUTRIENT LEVELS%GOBP%GO:0031669	0.0235835	0.114278	1	MAP1LC3B,HSPA8,MTMR3,TFEB,RRAGC,NUAK1,EIF4G1,ATG5,PDK2,EIF2S1,ZFYVE1,WIPI1,USP33,MAPK1,WDR45,FOXO1,RPTOR,PICK1,EIF2AK3,CLEC16A,ATG14,BMPR2,ATG7,CPEB4,MTOR,PIK3R4,DAP,XPR1,FAS,GABARAPL2,PRKD1	1.40127	0.352041	31	84
REGULATION OF CYTOPLASMIC TRANSPORT%GOBP%GO:1903649	REGULATION OF CYTOPLASMIC TRANSPORT%GOBP%GO:1903649	0.0236585	0.1145	1	MAP2,CHMP3,SNX3,PTPN23,SNX12,MAPK1	1.58352	0.545374	6	20
INSULIN IGF PATHWAY-PROTEIN KINASE B SIGNALING CASCADE%PANTHER PATHWAY%P00033	INSULIN IGF PATHWAY-PROTEIN KINASE B SIGNALING CASCADE%PANTHER PATHWAY%P00033	0.0238523	0.115296	1	PIK3CA,PIK3CA,PTEN,PTEN,PTEN,PTEN,TSC2,TSC2,FOXO1,FOXO1,GSK3B,GSK3B	1.52275	0.4573	12	35
SLC-MEDIATED TRANSMEMBRANE TRANSPORT%REACTOME DATABASE ID RELEASE 77%425407	SLC-MEDIATED TRANSMEMBRANE TRANSPORT%REACTOME DATABASE ID RELEASE 77%425407	0.0239634	0.115691	-1	SLC28A3,SLC16A3,SLC4A8,BSG,SLC9A1,SLC2A3,SLC4A7,SLC39A10,SLC2A1,SLC39A6,SLC32A1,PDZD11,SLC1A5,SLC16A7,HEPH,SLC1A4,SLC20A2	-1.49102	-0.446626	17	54
BIOLOGICAL PROCESS INVOLVED IN INTERSPECIES INTERACTION BETWEEN ORGANISMS%GOBP%GO:0044419	BIOLOGICAL PROCESS INVOLVED IN INTERSPECIES INTERACTION BETWEEN ORGANISMS%GOBP%GO:0044419	0.024	0.115725	-1	GGT3P,LGALS8,VAMP8,SERPINB9,BAIAP2L1,CLU,YES1,ICAM1,COLEC11,CPS1,LIAS,ANO6,IFI16,MFHAS1,ADAM17,SP100,HMGA1,ZC3HAV1,PHB,FN1,SIRPA,ADAR,LYN,MOV10,THOC2,TRIM25,SP1,PDE12,BST2,NRP1,NOD1,HDAC1,ENO1,RRP1B,SHPK,JUN,DDX58,CHMP4C,AXL,SETD2,SHMT2,GBP1,BNIP3,VAPA,PRKCD,HLA-A,MTDH,IFIT5,PML,PQBP1,PDCD4,THOC1,RHOA,VAPB,RXRA,ZMYND11,JAK1,THOC6,ADAM9,TRIM27,CDK6,CTR9,VAMP7,BAIAP2,SERPINE1,GAS6,CD36,AKAP1,SRC,SA…	-1.28414	-0.305906	82	302
CELLULAR RESPONSE TO BMP STIMULUS%GOBP%GO:0071773	CELLULAR RESPONSE TO BMP STIMULUS%GOBP%GO:0071773	0.0240805	0.115828	-1	BMP10,ENG,ADAMTS7,BMP7,GDF15,SFRP1,CHRD,PDCD4,NOG,ADAMTS12,LEFTY2,CER1,GDF6,TGFB1,BMP5	-1.53526	-0.518581	15	29
RESPONSE TO BMP%GOBP%GO:0071772	RESPONSE TO BMP%GOBP%GO:0071772	0.0240805	0.115828	-1	BMP10,ENG,ADAMTS7,BMP7,GDF15,SFRP1,CHRD,PDCD4,NOG,ADAMTS12,LEFTY2,CER1,GDF6,TGFB1,BMP5	-1.53526	-0.518581	15	29
VALIDATED TARGETS OF C-MYC TRANSCRIPTIONAL REPRESSION%PATHWAY INTERACTION DATABASE NCI-NATURE CURATED DATA%VALIDATED TARGETS OF C-MYC TRANSCRIPTIONAL REPRESSION	VALIDATED TARGETS OF C-MYC TRANSCRIPTIONAL REPRESSION%PATHWAY INTERACTION DATABASE NCI-NATURE CURATED DATA%VALIDATED TARGETS OF C-MYC TRANSCRIPTIONAL REPRESSION	0.0241121	0.115838	-1	COL1A2,CLU,LGALS1,ITGA6,SFXN3,NDRG1,SFRP1,SP1,HDAC1,NFYA	-1.52382	-0.489227	10	37
GOLGI-TO-ER RETROGRADE TRANSPORT%REACTOME%R-HSA-8856688.1	GOLGI-TO-ER RETROGRADE TRANSPORT%REACTOME%R-HSA-8856688.1	0.0242236	0.116232	1	BICD2,RAB3GAP1,RAB3GAP2,KIF21A,NAPB,PAFAH1B2,DYNC1H1,ACTR10,PAFAH1B3,DCTN5,KLC1,ARFGAP2,DYNC1I1,ACTR1A,CAPZA2,COPG1,DCTN4,DCTN1,KIF1C,NAPA,PAFAH1B1,KIF1B,SEC22B,ARCN1,BICD1,DYNC1I2,GBF1,DYNC1LI1,KIF5B,KLC4,RAB6A,KIF2C,DCTN3	1.40581	0.349086	33	90
EXTRA-NUCLEAR ESTROGEN SIGNALING%REACTOME DATABASE ID RELEASE 77%9009391	EXTRA-NUCLEAR ESTROGEN SIGNALING%REACTOME DATABASE ID RELEASE 77%9009391	0.0247866	0.118788	-1	GNG5,NRAS,GNB4,GNAI3,GNB1,MMP2,GNAI2,HRAS,GNB2	-1.51899	-0.490873	9	36
PHOSPHATIDYLINOSITOL DEPHOSPHORYLATION%GOBP%GO:0046856	PHOSPHATIDYLINOSITOL DEPHOSPHORYLATION%GOBP%GO:0046856	0.0249288	0.119213	1	MTMR8,MTMR3,PTEN,SYNJ2,INPP5F,MTMR6,MTMR9	1.58499	0.581449	7	16
POSITIVE REGULATION OF CATABOLIC PROCESS%GOBP%GO:0009896	POSITIVE REGULATION OF CATABOLIC PROCESS%GOBP%GO:0009896	0.0249377	0.119213	1	RILP,PTTG1IP,TRIM5,HECW2,SAMD4A,RNF41,LRSAM1,VPS35,DAGLB,RNF14,RAB3GAP1,YTHDF3,TFEB,PARK7,RCHY1,RAB3GAP2,PTEN,TSC2,NUB1,SIRT2,YTHDF2,PRICKLE1,GTPBP1,ZSWIM8,DAPK1,SMURF2,PAFAH1B2,LSM1,HSP90AA1,VDAC1,AMER1,HECTD1,GBA,APC,WWP2,SH3D19,ARIH1,ITCH,GRSF1,PABPC1,LARP1,BAG6,USP5,DXO,ARIH2,FOXO1,AGO2,RC3H1,SNCA,NANOS1,UPF1,VCP,DIS3L2,CNOT7,ATG7,DDB1,ZYG11B,CCDC22,BAD,GSK3B,HSPBP1,VPS13D,FYCO1,KEAP1,VPS28,R…	1.25046	0.269198	88	267
CHORDATE EMBRYONIC DEVELOPMENT%GOBP%GO:0043009	CHORDATE EMBRYONIC DEVELOPMENT%GOBP%GO:0043009	0.0249664	0.119213	-1	MYH6,COL2A1,KIAA1217,FOLR1,BMP7,ADAM10,HEY2,TCOF1,COL1A1,KDM2B,NASP,WNT11,NKX2-5,PDGFB,NOLC1,SEMA4C,CTNNB1,CHRD,IGF2,HOXB4,FUT8,PCSK5,NOG,RBPJ	-1.43676	-0.403229	24	78
TRIF(TICAM1)-MEDIATED TLR4 SIGNALING%REACTOME%R-HSA-937061.2	TRIF(TICAM1)-MEDIATED TLR4 SIGNALING%REACTOME%R-HSA-937061.2	0.0250493	0.119302	1	UBE2N,DUSP3,MAPKAPK2,UBE2D3,PTPN11,TRAF6,PPP2R1A,TNIP2,UBE2D1,IRAK1,NKIRAS2,MAPK1,NFKB1,RPS6KA3,TRAF3,IKBKB,TAB2,NKIRAS1	1.45095	0.391394	18	58
MYD88-INDEPENDENT TLR4 CASCADE%REACTOME%R-HSA-166166.2	MYD88-INDEPENDENT TLR4 CASCADE%REACTOME%R-HSA-166166.2	0.0250493	0.119302	1	UBE2N,DUSP3,MAPKAPK2,UBE2D3,PTPN11,TRAF6,PPP2R1A,TNIP2,UBE2D1,IRAK1,NKIRAS2,MAPK1,NFKB1,RPS6KA3,TRAF3,IKBKB,TAB2,NKIRAS1	1.45095	0.391394	18	58
PID_SYNDECAN_2_PATHWAY%MSIGDB_C2%PID_SYNDECAN_2_PATHWAY	PID_SYNDECAN_2_PATHWAY%MSIGDB_C2%PID_SYNDECAN_2_PATHWAY	0.0250762	0.119302	-1	LAMA3,LAMA1,EPHB2,MMP2,HRAS,SRC,SDCBP,ITGA2,TGFB1,CASK	-1.56422	-0.575301	10	20
NEGATIVE REGULATION OF CELLULAR RESPONSE TO GROWTH FACTOR STIMULUS%GOBP%GO:0090288	NEGATIVE REGULATION OF CELLULAR RESPONSE TO GROWTH FACTOR STIMULUS%GOBP%GO:0090288	0.0252863	0.120156	-1	GPC1,SHISA2,FBN1,GREM2,SPRY3,DCN,BMPER,SPRY1,EMILIN1,THBS1,CHRD,ATP2B4,NOG,FGF2,ADAMTS12,AGT,CER1	-1.50396	-0.467821	17	43
MUSCLE ORGAN DEVELOPMENT%GOBP%GO:0007517	MUSCLE ORGAN DEVELOPMENT%GOBP%GO:0007517	0.0253278	0.120207	-1	MYH6,LAMA2,BMP10,DSP,ENG,COL6A3,TCAP,HEY2,MYH3,TCF12,STRA6,NKX2-5,S1PR1,MYBPC3,TTN,MYL6B,VAMP5,UTRN,NOG,RBPJ,MYL3,FHL3,CAV1,TGFBR1,DAG1,TNNC1,CAPN3,BASP1,PKP2,TBX20,MYH7,TGFB1,RYR2,TPM1	-1.42274	-0.396192	34	82
FAS SIGNALING PATHWAY%PANTHER PATHWAY%P00020	FAS SIGNALING PATHWAY%PANTHER PATHWAY%P00020	0.0254104	0.120454	-1	CAPG,CAPG,PARP2,PARP2,PARP1,PARP1,APAF1,JUN,JUN,PARP4,LMNB2,LMNB2,LMNB2	-1.49534	-0.452427	13	50
NEGATIVE REGULATION OF CELL MOTILITY%GOBP%GO:2000146	NEGATIVE REGULATION OF CELL MOTILITY%GOBP%GO:2000146	0.0255037	0.120529	-1	STC1,THY1,BMP10,RECK,PODN,ENG,ATP1B2,JUP,CDH1,SP100,LRP1,RAP2C,DCN,ZMYND8,SFRP1,BST2,WNT11,EMILIN1,ADAMTS9,MECP2,MAGI2,IGFBP5,THBS1,CHRD,KRIT1,ATP2B4,RHOA,NOG,FGF2,RAC1,SERPINE1,RAP2B,IGFBP3,DAG1,ITGB1BP1,CERS2	-1.37815	-0.361863	36	122
ACTIVATION OF HOX GENES DURING DIFFERENTIATION%REACTOME%R-HSA-5619507.3	ACTIVATION OF HOX GENES DURING DIFFERENTIATION%REACTOME%R-HSA-5619507.3	0.0255183	0.120529	-1	NCOA6,PIAS2,JUN,POLR2I,POLR2D,HOXB4,RXRA,ZNF335,RBBP5,YY1,SUZ12,PKNOX1,WDR5,EP300,PBX1,CTCF,KMT2D	-1.51168	-0.476292	17	40
ACTIVATION OF ANTERIOR HOX GENES IN HINDBRAIN DEVELOPMENT DURING EARLY EMBRYOGENESIS%REACTOME%R-HSA-5617472.2	ACTIVATION OF ANTERIOR HOX GENES IN HINDBRAIN DEVELOPMENT DURING EARLY EMBRYOGENESIS%REACTOME%R-HSA-5617472.2	0.0255183	0.120529	-1	NCOA6,PIAS2,JUN,POLR2I,POLR2D,HOXB4,RXRA,ZNF335,RBBP5,YY1,SUZ12,PKNOX1,WDR5,EP300,PBX1,CTCF,KMT2D	-1.51168	-0.476292	17	40
POSITIVE REGULATION OF LEUKOCYTE ACTIVATION%GOBP%GO:0002696	POSITIVE REGULATION OF LEUKOCYTE ACTIVATION%GOBP%GO:0002696	0.0256256	0.12089	-1	THY1,VAMP8,YES1,FLOT2,EPHB2,CD55,SIRPA,LYN,MMP14,TP53BP1,MAD2L2,AXL,HLA-A,THBS1,IGF2,ZNF335,NKAP,VAMP7,GAS6,SRC,XRCC6,CAV1,STX4	-1.44503	-0.411395	23	71
IL2%NETPATH%IL2	IL2%NETPATH%IL2	0.0257035	0.121112	1	STAT4,PIK3R1,PIK3CA,PTPN11,NR3C1,RAF1,YBX1,MAPK1,EIF4E,NFKB1,SHC1,BAD,MTOR,CCNE1,SHB,SOS1,FYN,RPS6,FOXO3,MAPK14	1.49536	0.424872	20	45
CHEMICAL HOMEOSTASIS%GOBP%GO:0048878	CHEMICAL HOMEOSTASIS%GOBP%GO:0048878	0.0257961	0.121403	-1	PCK2,STC1,THY1,CYBRD1,ATP1A2,ATP2B1,ATP1B1,ATP1A1,SLC4A8,HK2,SLC9A1,ATP1B2,SLC4A7,ITPR1,RCN3,SLC39A10,WFS1,SLC39A6,APOA1,CD55,TCIRG1,LPAR2,DCN,PDK3,CACNB3,ITPR3,ANK3,ATP7A,P2RX4,LIPG,PYGL,ANGPTL4,CHERP,CRY2,HACD3,GLS,LIMA1,CACNA1C,WNK2,ATP1B3,STOML2,STK11,PML,STC2,NPTN,ATP2B4,LDLRAP1,HEPH,FKBP1B,VAPB,SLC25A23,ABCB6,CACNA2D1,CA2,ISCU,HRC,FOXK2,HSP90B1,FGF2,JPH1,GAS6,CD36,SRC,ATP6V1A,CNNM4,CHP1,CAV…	-1.28281	-0.306094	74	298
ASSEMBLY OF THE PRE-REPLICATIVE COMPLEX%REACTOME DATABASE ID RELEASE 77%68867	ASSEMBLY OF THE PRE-REPLICATIVE COMPLEX%REACTOME DATABASE ID RELEASE 77%68867	0.0259209	0.121844	1	PSME4,PSMF1,PSMD9,PSME3,PSMD5,PSMA5,PSMB6,PSMD4,PSMA1,PSMA7,PSMB3,PSMB4,UBA52,PSMA6,PSMD11,ORC5	1.4638	0.402668	16	52
REGULATION OF CHEMOTAXIS%GOBP%GO:0050920	REGULATION OF CHEMOTAXIS%GOBP%GO:0050920	0.0259976	0.122058	-1	MOSPD2,MTUS1,ANO6,ADAM17,STX3,ADAM10,MPP1,SEMA4B,LYN,P2RX4,NRP1,SEMA4D,PDGFB,SEMA3C,SEMA4C,THBS1,TUBB2B,ROBO2,FGF2,RAC1,JAM3,SERPINE1,GAS6,STX4	-1.44395	-0.412296	24	70
REGULATION OF LEUKOCYTE CHEMOTAXIS%GOBP%GO:0002688	REGULATION OF LEUKOCYTE CHEMOTAXIS%GOBP%GO:0002688	0.0261909	0.122819	-1	MOSPD2,MTUS1,ANO6,ADAM17,ADAM10,MPP1,LYN,THBS1,RAC1,JAM3,SERPINE1,GAS6	-1.51536	-0.498095	12	33
REGULATION OF TNFR1 SIGNALING%REACTOME%R-HSA-5357905.3	REGULATION OF TNFR1 SIGNALING%REACTOME%R-HSA-5357905.3	0.0263415	0.123225	1	TAX1BP1,IKBKB,USP4,OTUD7B,RNF31,XIAP,UBA52,RBCK1,SPPL2A	1.56378	0.538573	9	20
L1CAM INTERACTIONS%REACTOME%R-HSA-373760.2	L1CAM INTERACTIONS%REACTOME%R-HSA-373760.2	0.0263966	0.123225	-1	LAMB1,LAMC1,SPTBN2,LAMA1,EPHB2,NRP2,AP2M1,AP2A2,DLG1,ANK3,NRP1,PAK1,NCAM1,ALCAM,RPS6KA5,RDX,RAC1,AP2B1,CNTNAP1,SDCBP,SPTB,KIF4A,ITGA5,DNM1,NUMB,ITGA2	-1.46117	-0.423339	26	64
NEURAL CREST CELL DEVELOPMENT%GOBP%GO:0014032	NEURAL CREST CELL DEVELOPMENT%GOBP%GO:0014032	0.0264032	0.123225	-1	FOLR1,TCOF1,FN1,SEMA4B,NRP1,SEMA4D,HAND2,SEMA3C,NOLC1,TAPT1,SEMA4C,RADIL	-1.52446	-0.519262	12	28
STEM CELL DEVELOPMENT%GOBP%GO:0048864	STEM CELL DEVELOPMENT%GOBP%GO:0048864	0.0264032	0.123225	-1	FOLR1,TCOF1,FN1,SEMA4B,NRP1,SEMA4D,HAND2,SEMA3C,NOLC1,TAPT1,SEMA4C,RADIL	-1.52446	-0.519262	12	28
GLYCOSYLATION%GOBP%GO:0070085	GLYCOSYLATION%GOBP%GO:0070085	0.0265174	0.12351	-1	PLOD2,MGAT1,NUDT14,B4GALT4,MGAT4C,DPY19L1,ALG2,B4GALT1,ST3GAL4,PLOD1,TMTC3,GXYLT1,PLOD3,B4GAT1,COG3,GXYLT2,FUT8,POFUT1,ST3GAL1,POMGNT2,UGGT2,ALG5,UGGT1,GFPT2,MGAT5,MGAT4B	-1.40244	-0.385967	26	89
SENSORY PERCEPTION%REACTOME%R-HSA-9709957.2	SENSORY PERCEPTION%REACTOME%R-HSA-9709957.2	0.0265272	0.12351	-1	CACNB2,EPB41L1,HSPG2,ATP2B1,GPC1,EPB41L3,AGRN,LRP1,MYO1C,APOA1,MPP1,GNB1,EPS8L2,STRA6,SDC3,SNAP25,GPC3,RDH11,RDX,TWF2,CACNA2D2,GPC4,REEP1,PCLO,GPC2,SDC4,REEP5,NMT2	-1.45018	-0.415747	28	68
CHAPERONE COFACTOR-DEPENDENT PROTEIN REFOLDING%GOBP%GO:0051085	CHAPERONE COFACTOR-DEPENDENT PROTEIN REFOLDING%GOBP%GO:0051085	0.0265748	0.12352	1	DNAJC7,DNAJB5,HSPA8,DNAJB12,HSPA14,GAK,HSPE1,HSPA9,HSPA2,HSPA6,DNAJB1,HSPA5,ST13	1.55861	0.522862	13	22
APOPTOTIC EXECUTION PHASE%REACTOME DATABASE ID RELEASE 77%75153	APOPTOTIC EXECUTION PHASE%REACTOME DATABASE ID RELEASE 77%75153	0.0265923	0.12352	-1	DSG2,DSP,OCLN,ADD1,CDH1,TJP1,PLEC,PRKCD,CTNNB1	-1.51235	-0.488729	9	36
NUCLEIC ACID TRANSPORT%GOBP%GO:0050657	NUCLEIC ACID TRANSPORT%GOBP%GO:0050657	0.0268274	0.124318	-1	NUP85,THOC2,ALKBH5,TPR,NUP62,FLOT1,TST,NUP153,THOC1,POLR2D,PNPT1,KIF5C,THOC6,NUP155,ENY2,SLBP,RAE1,ZC3H11A,PABPN1,NUP88,SMG1,SARNP,THOC5,NUP160,SSB,PCID2,NCBP1,NCBP2,GLE1,NUP107,DDX39A,RBM15B,AGFG1	-1.43522	-0.40556	33	75
RNA TRANSPORT%GOBP%GO:0050658	RNA TRANSPORT%GOBP%GO:0050658	0.0268274	0.124318	-1	NUP85,THOC2,ALKBH5,TPR,NUP62,FLOT1,TST,NUP153,THOC1,POLR2D,PNPT1,KIF5C,THOC6,NUP155,ENY2,SLBP,RAE1,ZC3H11A,PABPN1,NUP88,SMG1,SARNP,THOC5,NUP160,SSB,PCID2,NCBP1,NCBP2,GLE1,NUP107,DDX39A,RBM15B,AGFG1	-1.43522	-0.40556	33	75
WOUND HEALING%GOBP%GO:0042060	WOUND HEALING%GOBP%GO:0042060	0.0271598	0.125453	-1	STXBP1,PPL,DSP,ANO6,GNAQ,PLAUR,GNA12,ADAM17,STXBP3,COL5A1,CD9,MYOF,PLEC,CD44,FN1,GNAS,PAK1,GGCX,LMAN1,CD59,CSRP1,ERBB3,AXL,FGG,RHOA,F13A1,NOG,FGF2,CD36,SRC,RAP2B,TGFBR1,PLAT,FIBP	-1.3895	-0.373516	34	103
RETINA DEVELOPMENT IN CAMERA-TYPE EYE%GOBP%GO:0060041	RETINA DEVELOPMENT IN CAMERA-TYPE EYE%GOBP%GO:0060041	0.0271618	0.125453	-1	COL4A1,THY1,NRP1,SDK2	-1.56322	-0.596368	4	17
POSITIVE REGULATION OF SIGNALING RECEPTOR ACTIVITY%GOBP%GO:2000273	POSITIVE REGULATION OF SIGNALING RECEPTOR ACTIVITY%GOBP%GO:2000273	0.0271682	0.125453	-1	ADRA2B,ADAM17,EPHB2,NRP1,HDAC1	-1.57157	-0.617019	5	15
REGULATION OF CELL ADHESION%GOBP%GO:0030155	REGULATION OF CELL ADHESION%GOBP%GO:0030155	0.0272393	0.125634	-1	THY1,TESC,YES1,F11R,LOXL3,SLC9A1,JUP,CDH1,BMP7,FLOT2,PLAUR,EPHB2,STX3,CD9,ADAM10,APOA1,CD55,PODXL,TJP1,CD44,FN1,SIRPA,ANK3,NPNT,ST3GAL4,LYN,SFRP1,EPCAM,NRP1,TGFBI,SEMA4D,PLXND1,PDGFB,FLOT1,MAD2L2,SERPINE2,ERBB3,GBP1,PRKCD,HLA-A,THBS1,CHRD,FGG,IGF2,RHOA,JAK1,ADAM9,S100A10,RDX,NKAP,UTRN,CDK6,CIB1,RAC1,JAM3,PIEZO1,SIPA1,PKP4,SERPINE1,CD36,SRC,RREB1,CAV1	-1.29476	-0.314622	63	241
CONSTITUTIVE SIGNALING BY AKT1 E17K IN CANCER%REACTOME%R-HSA-5674400.1	CONSTITUTIVE SIGNALING BY AKT1 E17K IN CANCER%REACTOME%R-HSA-5674400.1	0.0273807	0.12612	1	TSC2,CASP9,FOXO1,AKT1S1,BAD,GSK3B,MTOR,RPS6KB2,RICTOR,AKT3,FOXO3	1.55307	0.542249	11	19
PATTERN SPECIFICATION PROCESS%GOBP%GO:0007389	PATTERN SPECIFICATION PROCESS%GOBP%GO:0007389	0.0274578	0.12612	-1	STC1,FOLR1,ENG,HEY2,SFRP1,KDM2B,PBX3,NKX2-5,CFC1,MTF2,CHRD,HOXB4,AIDA,PCSK5,NOG,TGFBR1,BMI1,CER1,TDGF1P3,CELSR2	-1.47637	-0.444545	20	52
REGULATION OF HORMONE SECRETION%GOBP%GO:0046883	REGULATION OF HORMONE SECRETION%GOBP%GO:0046883	0.0274673	0.12612	-1	TRH,VAMP8,RAB11FIP1,C2CD2L,NMB,SFRP1,SNAP25,FGG,VAMP7,STX4,AGT,ACSL4,SYT7,INS,KCNJ11,LRRC8A	-1.49405	-0.467314	16	42
NEUROGENESIS%GOBP%GO:0022008	NEUROGENESIS%GOBP%GO:0022008	0.0274732	0.12612	-1	LAMA2,LAMB1,THY1,METRN,TAOK3,GPC1,VSTM2L,EPB41L3,CLU,LAMC2,STXBP1,EFNB3,BSG,FOLR1,LAMA3,FGF13,LAMA5,SLC4A7,BMP7,IRX4,LAMA1,EPHB2,STX3,AGRN,RAB13,DAB1,CD9,LRP1,NRP2,ERCC2,FARP2,HEY2,SEMA4B,ANK3,ATP7A,MBOAT7,LYN,P2RX4,IQGAP1,JAG2,ACSL3,THOC2,PITX3,PBX3,NRP1,WNT11,PAK1,S100A6,SEMA4D,HAND2,LMTK2,PLXND1,SDK2,UGDH,SEMA3C,MYO6,NCAM1,SERPINE2,FARP1,ERBB3,CAMK2B,SEMA4C,VAPA,CTNNB1,DTNB,NOTCH3,NPTN,PBX2,NU…	-1.25623	-0.293415	87	401
PID_HES_HEY_PATHWAY%MSIGDB_C2%PID_HES_HEY_PATHWAY	PID_HES_HEY_PATHWAY%MSIGDB_C2%PID_HES_HEY_PATHWAY	0.0276327	0.126704	-1	HEY2,PARP1,HDAC1,RBPJ,NCOA1,YY1,CDKN1B,TCF3,KDM1A,EP300,ID1	-1.53154	-0.544993	11	23
REGULATION OF CILIUM ASSEMBLY%GOBP%GO:1902017	REGULATION OF CILIUM ASSEMBLY%GOBP%GO:1902017	0.0276994	0.126861	1	TBC1D17,ATG5,TBC1D8,RABEP2,CEP135,ARHGAP35,TBC1D10A,RABGAP1,TBC1D10B,CCDC88A,TBC1D22A,TBC1D5,IFT140,MAP4,TBC1D24,ATG3	1.49419	0.448726	16	35
BLOOD CIRCULATION%GOBP%GO:0008015	BLOOD CIRCULATION%GOBP%GO:0008015	0.0278821	0.127472	-1	MYH6,ATP1A2,CACNB2,ATP2B1,COL1A2,ATP1B1,ATP1A1,YES1,CPS1,OCLN,TCAP,TJP1,MYOF,P2RX4,PIK3C2A,PDGFB,CACNA1C,MYBPC3,TTN,FGG,KCNJ8,CTSZ,KCNQ1,SCPEP1,CACNA2D1,PCSK5,MYL3,GAS6,SRC,CAV1,AGT,MYL4,ITGB1BP1,TNNC1	-1.38789	-0.373085	34	103
SUBSTRATE ADHESION-DEPENDENT CELL SPREADING%GOBP%GO:0034446	SUBSTRATE ADHESION-DEPENDENT CELL SPREADING%GOBP%GO:0034446	0.0278977	0.127472	-1	LAMB1,LAMC3,LAMC1,LAMB3,LAMA5,LAMB2,FN1,NRP1,RADIL,RHOA,RAC1	-1.51725	-0.516808	11	28
HALLMARK_XENOBIOTIC_METABOLISM%MSIGDB_C2%HALLMARK_XENOBIOTIC_METABOLISM	HALLMARK_XENOBIOTIC_METABOLISM%MSIGDB_C2%HALLMARK_XENOBIOTIC_METABOLISM	0.0279945	0.127729	-1	MPP2,ARG2,CYP27A1,PTS,JUP,TPST1,BCAT1,MAOA,DHRS7,VTN,UGDH,FABP1,CYP2S1,PAPSS2,PGRMC1,SERPINE1,LONP1,CD36,PTGES3,BPHL,DHRS1	-1.44621	-0.417636	21	65
REGULATION OF LIPID TRANSPORT%GOBP%GO:0032368	REGULATION OF LIPID TRANSPORT%GOBP%GO:0032368	0.028019	0.127729	-1	TRIAP1,LRP1,APOA1,P2RX4,LIPG,ABCA8,TMEM30A,PRKCD,THBS1,LDLRAP1,RXRA,CAV1,AGT,ANXA2,SIRT1,ABCA3	-1.51223	-0.489892	16	35
MYELOID LEUKOCYTE MIGRATION%GOBP%GO:0097529	MYELOID LEUKOCYTE MIGRATION%GOBP%GO:0097529	0.0281261	0.12792	-1	BSG,SIRPA,P2RX4,CXADR,PIP5K1C,PDGFB,JAM3,S100A8	-1.54589	-0.568559	8	20
REGULATION OF CELL ADHESION MEDIATED BY INTEGRIN%GOBP%GO:0033628	REGULATION OF CELL ADHESION MEDIATED BY INTEGRIN%GOBP%GO:0033628	0.0281261	0.12792	-1	TESC,PODXL,LYN,ADAM9,CIB1,JAM3,PIEZO1,SERPINE1,RAC3,ITGB1BP1	-1.54674	-0.568874	10	20
T CELL ACTIVATION%GOBP%GO:0042110	T CELL ACTIVATION%GOBP%GO:0042110	0.0284579	0.129279	-1	CADM1,ICAM1,ADAM17,CD44,ATP7A,JAG2,CXADR,STOML2,HLA-A,IFNA8	-1.48694	-0.460831	10	44
HDACS DEACETYLATE HISTONES%REACTOME DATABASE ID RELEASE 77%3214815	HDACS DEACETYLATE HISTONES%REACTOME DATABASE ID RELEASE 77%3214815	0.0286709	0.130006	-1	PHF21A,HDAC1,ARID4B,RCOR1,KDM1A,GATAD2A,MTA3,SUDS3,CHD4,MTA1,HMG20B,HDAC8,SAP18,RBBP4,SAP30,HDAC2	-1.52403	-0.522663	16	27
HEART DEVELOPMENT%GOBP%GO:0007507	HEART DEVELOPMENT%GOBP%GO:0007507	0.0287023	0.130006	-1	MYH6,DSG2,BMP10,NEBL,DSP,FOLR1,ENG,FBN1,BMP7,CRIP1,NRP2,TCAP,HEY2,FN1,NCOA6,SPRY1,CXADR,STRA6,NRP1,EMILIN1,HAND2,NKX2-5,CFC1,PDGFB,ADAMTS9,CACNA1C,S1PR1,SEMA3C,NDUFV2,ERBB3,MYBPC3,CTNNB1,TTN,WDR11,FLRT3,PDLIM4,PDCD4,GPC3,CRELD1,PCSK5,TMEM65,ROBO2,NOG,RBPJ	-1.33233	-0.336869	44	166
TOLL-LIKE RECEPTOR SIGNALING PATHWAY%GOBP%GO:0002224	TOLL-LIKE RECEPTOR SIGNALING PATHWAY%GOBP%GO:0002224	0.0287274	0.130006	1	MAPKAPK2,TRAF6,TNIP2,IRAK1,RPS6KA3,TRAF3	1.56764	0.575087	6	16
CELL MORPHOGENESIS%GOBP%GO:0000902	CELL MORPHOGENESIS%GOBP%GO:0000902	0.0287503	0.130006	-1	LAMA2,STC1,LAMB1,POF1B,LAMC3,TAOK3,LAMC1,VSTM2L,EPB41L3,CLU,LAMC2,STXBP1,EFNB3,BSG,LAMB3,LAMA3,LAMA5,BMP7,LAMA1,LAMB2,EPHB2,NRP2,FN1,SEMA4B,ANK3,ATP7A,IQGAP1,NRP1,PAK1,S100A6,SEMA4D,LMTK2,PLXND1,BIN3,SEMA3C,NCAM1,FARP1,SEMA4C,CTNNB1,NOTCH3,NPTN,RADIL,FLRT3,SCFD1,RHOA,RAB10,ALCAM,ZNF335,KIF5C,RPS6KA5,RHOG,ROBO2,CIB1,RAC1,BAIAP2	-1.29226	-0.315401	55	231
GENERAL TRANSCRIPTION BY RNA POLYMERASE I%PANTHER PATHWAY%P00022	GENERAL TRANSCRIPTION BY RNA POLYMERASE I%PANTHER PATHWAY%P00022	0.0288038	0.130098	-1	TBPL2,TBPL2,TBPL2,RPA2,UBTF,UBTF,POLR1B,POLR1B,TBPL1,TBPL1,TBPL1,TAF8,TAF8,TAF8	-1.54187	-0.567082	14	20
RESPONSE TO OXYGEN LEVELS%GOBP%GO:0070482	RESPONSE TO OXYGEN LEVELS%GOBP%GO:0070482	0.0289128	0.130326	-1	PLOD2,BMP7,ITPR1,AK4,ADAM17,LOXL2,PDK3,NDRG1,MMP2,SFRP1,ALKBH5,PLOD1,ANGPTL4,ARNT,FABP1,BNIP3,PML,THBS1,PDK1,TBL2,HSP90B1,RBPJ,LONP1,ATP6V1A,FAM162A,CAV1,HMOX2,AQP1,EP300,TP53,SIRT1,PGK1,RYR2	-1.39617	-0.385324	33	87
NEURAL CREST CELL DIFFERENTIATION%GOBP%GO:0014033	NEURAL CREST CELL DIFFERENTIATION%GOBP%GO:0014033	0.0289208	0.130326	-1	FOLR1,TCOF1,FN1,SEMA4B,NRP1,SEMA4D,HAND2,SEMA3C,NOLC1,TAPT1,SEMA4C,RADIL	-1.51967	-0.510706	12	30
REGULATION OF TYPE I INTERFERON-MEDIATED SIGNALING PATHWAY%GOBP%GO:0060338	REGULATION OF TYPE I INTERFERON-MEDIATED SIGNALING PATHWAY%GOBP%GO:0060338	0.0290244	0.130643	1	YTHDF3,YTHDF2,PTPN11,CNOT7,ISG15,HSP90AB1,UBE2K	1.54576	0.532367	7	20
REGULATION OF PROTEASOMAL PROTEIN CATABOLIC PROCESS%GOBP%GO:0061136	REGULATION OF PROTEASOMAL PROTEIN CATABOLIC PROCESS%GOBP%GO:0061136	0.0291102	0.130879	1	OPHN1,GLMN,RNF14,COMMD1,PARK7,RCHY1,NUB1,SIRT2,PRICKLE1,PSMF1,GIPC1,HECTD1,ARAF,ARIH1,BAG6,USP5,PSME3,ARIH2,RPL11,NUDT15,VCP,OGT,USP25,UBXN1,ZYG11B,GSK3B,HSPBP1,KEAP1,HSP90AB1,GABARAPL2,EIF3H,ATXN3,USP19,USP13,GPX1,BAG2	1.35865	0.32882	36	106
NEGATIVE REGULATION OF GROWTH%GOBP%GO:0045926	NEGATIVE REGULATION OF GROWTH%GOBP%GO:0045926	0.0293164	0.13161	-1	SLC6A4,BMP10,FGF13,GDF15,PHB,SEMA4B,SFRP1,BST2,WNT11,SEMA4D,ENO1,SEMA3C,SEMA4C,STK11,PML,EI24,PNPT1,CDKN2AIP,NOG,SIPA1,CDKN1B,PPT1,PPP1R9B,CCAR2,TP53,SEMA3B,SMARCA2,ING4,SIRT1,SMARCA4,TGFB1,NME6,PRDM11,DCUN1D3,CRLF3,HYAL2,SEMA6B,SEMA3F,SLIT2	-1.39189	-0.383062	39	89
REGULATION OF CELL-CELL ADHESION%GOBP%GO:0022407	REGULATION OF CELL-CELL ADHESION%GOBP%GO:0022407	0.0293866	0.13161	-1	THY1,YES1,F11R,LOXL3,CDH1,BMP7,FLOT2,PLAUR,CD9,APOA1,CD55,PODXL,TJP1,CD44,SIRPA,ANK3,ST3GAL4,LYN,EPCAM,FLOT1,MAD2L2,SERPINE2,PRKCD,HLA-A,FGG,IGF2,RHOA,JAK1,RDX,NKAP,PIEZO1,SRC,CAV1	-1.3753	-0.364375	33	115
PROTEIN SECRETION%GOBP%GO:0009306	PROTEIN SECRETION%GOBP%GO:0009306	0.0294069	0.13161	-1	TANGO2,RCN3,RAB13,LTBP2,PREB,RAB8B,FGG,RAB10,PCSK5,MIA2,RAB8A,PDIA4,GOLPH3,CANX,RAB3A,RAB11FIP5,RAB3D	-1.50844	-0.503936	17	31
ESTABLISHMENT OF PROTEIN LOCALIZATION TO EXTRACELLULAR REGION%GOBP%GO:0035592	ESTABLISHMENT OF PROTEIN LOCALIZATION TO EXTRACELLULAR REGION%GOBP%GO:0035592	0.0294069	0.13161	-1	TANGO2,RCN3,RAB13,LTBP2,PREB,RAB8B,FGG,RAB10,PCSK5,MIA2,RAB8A,PDIA4,GOLPH3,CANX,RAB3A,RAB11FIP5,RAB3D	-1.50844	-0.503936	17	31
NEGATIVE REGULATION OF ERK1 AND ERK2 CASCADE%GOBP%GO:0070373	NEGATIVE REGULATION OF ERK1 AND ERK2 CASCADE%GOBP%GO:0070373	0.0295927	0.132291	-1	EPHB2,SLC9A3R1,SPRY3,DLG1,PHB,SIRPA,SPRY1,LYN,EMILIN1,WNK2,GBP1	-1.51947	-0.525314	11	26
REGULATION OF EPITHELIAL CELL APOPTOTIC PROCESS%GOBP%GO:1904035	REGULATION OF EPITHELIAL CELL APOPTOTIC PROCESS%GOBP%GO:1904035	0.0297549	0.132797	-1	ICAM1,ANO6,WFS1,PAK4,THBS1,FGG,KRIT1,PDCD4,SERPINE1,GAS6	-1.53845	-0.55862	10	21
ENDOSOME TRANSPORT VIA MULTIVESICULAR BODY SORTING PATHWAY%GOBP%GO:0032509	ENDOSOME TRANSPORT VIA MULTIVESICULAR BODY SORTING PATHWAY%GOBP%GO:0032509	0.0297736	0.132797	1	RILP,CHMP7,CHMP3,SORT1,VPS36,VCP,CHMP1B,VPS28,UBXN6,CHMP4B	1.54933	0.519751	10	22
NON-MEMBRANE-BOUNDED ORGANELLE ASSEMBLY%GOBP%GO:0140694	NON-MEMBRANE-BOUNDED ORGANELLE ASSEMBLY%GOBP%GO:0140694	0.0299625	0.133376	1	ASB2,PGM5,DDX28,CSDE1,MYH11,MRPS2,ANLN,STARD9,MRPS11,YTHDF3,MYLK3,CSRP2,SBDS,YTHDF2,WDR1,MAPRE2,RPS14,OFD1,FLII,MTERF3,CEP135,ATXN2,RPS28,DYNC1H1,TMEM159,RPS19,ANKRD1,EIF2S1,ZFYVE1,MRPS7,G3BP1,RPS5,CSRP3,RPL11,MYL2,RC3H1,LMOD1,DBNL,RPL3,SYNPO2L,ACTN2,LSM3,GOLGA2,ERAL1,MYPN,NEK7,EIF6,DLGAP5,C1QBP,EDC3	1.27346	0.285446	50	188
PYRUVATE METABOLISM AND CITRIC ACID (TCA) CYCLE%REACTOME DATABASE ID RELEASE 77%71406	PYRUVATE METABOLISM AND CITRIC ACID (TCA) CYCLE%REACTOME DATABASE ID RELEASE 77%71406	0.0299715	0.133376	-1	SLC16A3,BSG,SDHA,SDHB,L2HGDH,PDK3,SUCLG2,ME3,LDHA,PDK1,RXRA,PDHX,PDPR,ME1,IDH3B,SLC16A1,SUCLG1	-1.47877	-0.456308	17	45
NEGATIVE REGULATION OF HYDROLASE ACTIVITY%GOBP%GO:0051346	NEGATIVE REGULATION OF HYDROLASE ACTIVITY%GOBP%GO:0051346	0.03001	0.133396	-1	RECK,SERPINB1,SERPINB9,F11R,IFI16,PLAUR,TRIAP1,LRP1,CD44,PAM16,ANGPTL4,CRY2,HRAS,SEMA4D,VTN,RRP1B,FABP1,SERPINE2,SERPINA1,BOD1L1,THBS1,ECM1,PPP1R1B,KDM5A,FKBP1B,GCHFR,TIMP3,RDX,SERPINE1,GAS6,SRC,CHP1,AGT	-1.37117	-0.362491	33	116
RNA LOCALIZATION%GOBP%GO:0006403	RNA LOCALIZATION%GOBP%GO:0006403	0.0300642	0.133486	-1	ZNF385A,NUP85,THOC2,ALKBH5,TPR,NUP62,FLOT1,TST,NUP153,THOC1,HNRNPU,POLR2D,PNPT1,KIF5C,THOC6,NUP155,ENY2,SLBP,RAE1,ZC3H11A,PABPN1,PRPF31,NUP88,SMG1,SARNP,NOP58,THOC5,NUP160,SSB,PCID2,NCBP1,NCBP2,EXOSC3,GLE1,NUP107,DDX39A,RBM15B,AGFG1,PRPF6	-1.38358	-0.376023	39	96
PROTEIN-PROTEIN INTERACTIONS AT SYNAPSES%REACTOME DATABASE ID RELEASE 77%6794362	PROTEIN-PROTEIN INTERACTIONS AT SYNAPSES%REACTOME DATABASE ID RELEASE 77%6794362	0.0302035	0.133954	-1	EPB41L1,EPB41L3,STXBP1,EPB41L2,LIN7C,EPB41,FLOT2,DLG1,FLOT1,LRRC4B,EPB41L5,PTPRF	-1.49556	-0.483303	12	36
FATTY-ACYL-COA METABOLIC PROCESS%GOBP%GO:0035337	FATTY-ACYL-COA METABOLIC PROCESS%GOBP%GO:0035337	0.0302979	0.134205	-1	HSD17B12,ACSL3,NUDT19,HACD2,ACSL4,PPT1,HACD1,SLC25A1,ACSF3	-1.53191	-0.569886	9	19
LYMPHOCYTE ACTIVATION INVOLVED IN IMMUNE RESPONSE%GOBP%GO:0002285	LYMPHOCYTE ACTIVATION INVOLVED IN IMMUNE RESPONSE%GOBP%GO:0002285	0.0303287	0.134205	-1	ICAM1,DOCK11,ATP7A,IFNA8,VAMP7,EXOSC6,EXOSC3,MSH6,MSH2	-1.53432	-0.564305	9	20
REGULATION OF CELL KILLING%GOBP%GO:0031341	REGULATION OF CELL KILLING%GOBP%GO:0031341	0.0303972	0.134357	-1	CADM1,SERPINB9,ICAM1,CD55,CD59,HLA-A	-1.55145	-0.599533	6	16
POSITIVE REGULATION OF OSSIFICATION%GOBP%GO:0045778	POSITIVE REGULATION OF OSSIFICATION%GOBP%GO:0045778	0.0304772	0.134559	-1	ATP2B1,FBN2,ANO6,BMP7	-1.55615	-0.610966	4	15
CONNECTIVE TISSUE DEVELOPMENT%GOBP%GO:0061448	CONNECTIVE TISSUE DEVELOPMENT%GOBP%GO:0061448	0.0308045	0.135608	-1	COL2A1,STC1,COL11A2,CRIP1,ZNF516,CD44,ATP7A,BMP1,PDGFB	-1.50068	-0.486149	9	35
RETINOID METABOLISM AND TRANSPORT%REACTOME DATABASE ID RELEASE 77%975634	RETINOID METABOLISM AND TRANSPORT%REACTOME DATABASE ID RELEASE 77%975634	0.0308185	0.135608	-1	HSPG2,GPC1,AGRN,LRP1,APOA1,SDC3,GPC3,RDH11,GPC4,GPC2,SDC4	-1.51328	-0.533785	11	24
POTASSIUM ION TRANSMEMBRANE TRANSPORT%GOBP%GO:0071805	POTASSIUM ION TRANSMEMBRANE TRANSPORT%GOBP%GO:0071805	0.0308185	0.135608	-1	ATP1A2,ATP1B1,ATP1A1,SLC9A1,ATP1B2,ATP1B3,KCNJ8,KCNQ1	-1.51259	-0.53354	8	24
P75(NTR)-MEDIATED SIGNALING%PATHWAY INTERACTION DATABASE NCI-NATURE CURATED DATA%P75(NTR)-MEDIATED SIGNALING	P75(NTR)-MEDIATED SIGNALING%PATHWAY INTERACTION DATABASE NCI-NATURE CURATED DATA%P75(NTR)-MEDIATED SIGNALING	0.0310909	0.136603	1	PIK3R1,PIK3CA,TRAF6,SQSTM1,DIABLO,IRAK1,NDN,ARHGDIA,CASP9,CASP3,SORT1,SHC1,NGFR,IKBKB,BAD,RHOC	1.47357	0.428744	16	41
MUCOPOLYSACCHARIDE METABOLIC PROCESS%GOBP%GO:1903510	MUCOPOLYSACCHARIDE METABOLIC PROCESS%GOBP%GO:1903510	0.0311141	0.136603	-1	CHST6,CHST14,CHSY1,CD44,ST3GAL4,UGDH,B4GAT1,CHST12,FGF2,ST3GAL1,CHST11,TGFB1,GLCE,CHPF,B3GNT2,ST3GAL2,CHST7,HYAL2	-1.51511	-0.52906	18	25
ESTABLISHMENT OF RNA LOCALIZATION%GOBP%GO:0051236	ESTABLISHMENT OF RNA LOCALIZATION%GOBP%GO:0051236	0.031161	0.136656	-1	NUP85,THOC2,ALKBH5,TPR,NUP62,FLOT1,TST,NUP153,THOC1,POLR2D,PNPT1,KIF5C,THOC6,NUP155,ENY2,SLBP,RAE1,ZC3H11A,PABPN1,NUP88,SMG1,SARNP,THOC5,NUP160,SSB,PCID2,NCBP1,NCBP2,GLE1,NUP107,DDX39A,RBM15B,AGFG1	-1.41618	-0.398376	33	77
GOLGI VESICLE TRANSPORT%GOBP%GO:0048193	GOLGI VESICLE TRANSPORT%GOBP%GO:0048193	0.0312775	0.137014	1	ANK1,BICD2,RABIF,RABEP1,SNX2,SCYL1,TRAPPC3,COMMD1,ARL3,LAMP1,GOSR2,SEC31A,TRAPPC1,PITPNB,SPIRE1,SNX3,PDCD6,GOLPH3L,SNX12,PEF1,ARFGAP2,ERGIC3,SORCS1,VPS51,WIPI1,AP3D1,COG1,YKT6,SORT1,RER1,GAK,MACF1,PICK1,YIF1A,TRAPPC12,COG8,CCDC22,GOLGA2,COG4,USO1,TRAPPC11,COPG1,SEC24A,SAR1B,SNX8,CUL3,GABARAPL2,KIF13A,KIF1C,PRKD1,DNM2,NAPA,TRAPPC8	1.25048	0.27688	53	210
REGULATION OF CELL MIGRATION INVOLVED IN SPROUTING ANGIOGENESIS%GOBP%GO:0090049	REGULATION OF CELL MIGRATION INVOLVED IN SPROUTING ANGIOGENESIS%GOBP%GO:0090049	0.031348	0.137169	-1	SRPX2,PIK3C2A,THBS1,RHOA,CIB1,FGF2,ITGB1BP1	-1.55418	-0.610192	7	15
IONOTROPIC GLUTAMATE RECEPTOR PATHWAY%PANTHER PATHWAY%P00037	IONOTROPIC GLUTAMATE RECEPTOR PATHWAY%PANTHER PATHWAY%P00037	0.0313998	0.137243	-1	COMT,VAMP8,VAMP8,VAMP8,SNAP25,SNAP25,CAMK2B,CAMK2B	-1.50347	-0.505263	8	30
LEUKOCYTE MEDIATED IMMUNITY%GOBP%GO:0002443	LEUKOCYTE MEDIATED IMMUNITY%GOBP%GO:0002443	0.0314507	0.137312	-1	CADM1,VAMP8,SERPINB9,STXBP2,ADAM17,STXBP3,CD55,GNL1,HLA-A	-1.49469	-0.495491	9	32
GAP-FILLING DNA REPAIR SYNTHESIS AND LIGATION IN TC-NER%REACTOME%R-HSA-6782210.1	GAP-FILLING DNA REPAIR SYNTHESIS AND LIGATION IN TC-NER%REACTOME%R-HSA-6782210.1	0.0315607	0.13764	-1	ERCC2,RFC1,HMGN1,LIG3,XRCC1,POLD3,CUL4B,POLR2I,POLR2D,PPIE,ISY1,ERCC6,PRPF19,RFC3,RPA2,EP300	-1.4574	-0.438834	16	52
PID_TRAIL_PATHWAY%MSIGDB_C2%PID_TRAIL_PATHWAY	PID_TRAIL_PATHWAY%MSIGDB_C2%PID_TRAIL_PATHWAY	0.0316901	0.138051	1	PIK3R1,PIK3CA,DAP3,SMPD1,MAPK1,IKBKB	1.55769	0.579372	6	15
ORGANIC HYDROXY COMPOUND CATABOLIC PROCESS%GOBP%GO:1901616	ORGANIC HYDROXY COMPOUND CATABOLIC PROCESS%GOBP%GO:1901616	0.031845	0.138572	-1	MOXD1,COMT,LDHD,CYP27A1,MAOA,SULT1A2	-1.51273	-0.5383	6	23
EPIDERMIS DEVELOPMENT%GOBP%GO:0008544	EPIDERMIS DEVELOPMENT%GOBP%GO:0008544	0.0319656	0.138943	-1	LAMC2,DSP,LAMB3,LAMA3,SLC4A7,FLOT2,ERCC2,ATP7A,JAG2,PIP5K1A,PLOD1,HDAC1,MYO6,CTNNB1	-1.4791	-0.460087	14	43
DE NOVO PURINE BIOSYNTHESIS%PANTHER PATHWAY%P02738	DE NOVO PURINE BIOSYNTHESIS%PANTHER PATHWAY%P02738	0.0320109	0.138978	1	NME2,NME2,AK1,AK1,AK1,ADSL,ADSL,ADSL,PPAT,PPAT,GART,GART,GART,NME1,NME1	1.42815	0.387663	15	55
REGULATION OF ENDOTHELIAL CELL APOPTOTIC PROCESS%GOBP%GO:2000351	REGULATION OF ENDOTHELIAL CELL APOPTOTIC PROCESS%GOBP%GO:2000351	0.0320446	0.138978	-1	ICAM1,ANO6,PAK4,THBS1,FGG,KRIT1,PDCD4,SERPINE1,GAS6	-1.55159	-0.609175	9	15
MRNA CIS SPLICING, VIA SPLICEOSOME%GOBP%GO:0045292	MRNA CIS SPLICING, VIA SPLICEOSOME%GOBP%GO:0045292	0.0321472	0.139148	-1	PSIP1,WBP11,CWC15,DCPS,CACTIN,RBM22,WBP4,SNRPC,NCBP2,SRSF1,DDX23,SNRNP200,SART1	-1.54272	-0.588547	13	17
MORPHOGENESIS OF AN EPITHELIUM%GOBP%GO:0002009	MORPHOGENESIS OF AN EPITHELIUM%GOBP%GO:0002009	0.0321548	0.139148	-1	COL4A1,FOLR1,ENG,LAMA3,LIN7C,LAMA5,BMP7,ADAM17,COL5A1,SLC9A3R1,PODXL,CD44,NPNT,ATP7A,KDM2B,NRP1,WNT11,PAK1,NKX2-5,TRAF3IP1,SEMA4C,CTNNB1,FLRT3,GPC3,RHOA,RAB10,FGF2,RBPJ	-1.37414	-0.371227	28	100
CHOLESTEROL BIOSYNTHESIS%PANTHER PATHWAY%P00014	CHOLESTEROL BIOSYNTHESIS%PANTHER PATHWAY%P00014	0.0322975	0.139612	1	GGPS1,GGPS1,MVD,MVD,MVK,MVK,HMGCS1,HMGCS1,PMVK,PMVK,HMGCR,HMGCR	1.53806	0.522423	12	21
FATTY ACID DERIVATIVE BIOSYNTHETIC PROCESS%GOBP%GO:1901570	FATTY ACID DERIVATIVE BIOSYNTHETIC PROCESS%GOBP%GO:1901570	0.0323619	0.139697	-1	GGT3P,ACSS3,HSD17B12,ACSL3,HMGCL,HACD2,ACSL4,PPT1,HACD1,SLC25A1,ACSF3	-1.52142	-0.55956	11	20
PID_IL1_PATHWAY%MSIGDB_C2%PID_IL1_PATHWAY	PID_IL1_PATHWAY%MSIGDB_C2%PID_IL1_PATHWAY	0.032497	0.139697	1	PIK3R1,PIK3CA,TRAF6,SQSTM1,IRAK1,NFKB1,IKBKB,UBE2V1	1.56562	0.563202	8	17
REGULATION OF DOUBLE-STRAND BREAK REPAIR VIA HOMOLOGOUS RECOMBINATION%GOBP%GO:0010569	REGULATION OF DOUBLE-STRAND BREAK REPAIR VIA HOMOLOGOUS RECOMBINATION%GOBP%GO:0010569	0.0325025	0.139697	-1	PARP1,SMCHD1,TP53BP1,MAD2L2,SETD2,TERF2IP,PPP4R2,KDM1A,ERCC6,RPA2	-1.51994	-0.545358	10	22
DNA DAMAGE CHECKPOINT SIGNALING%GOBP%GO:0000077	DNA DAMAGE CHECKPOINT SIGNALING%GOBP%GO:0000077	0.0325087	0.139697	-1	TAOK3,ATF2,CHEK2,TRIAP1,MDC1,WAC,TP53BP1,PML,CDKN1B,CDC5L,ERCC6,PRPF19,RPA2,TP53,PLK1,SDE2,NBN,CDK5RAP3	-1.46933	-0.453396	18	45
PROTEIN DEACYLATION%GOBP%GO:0035601	PROTEIN DEACYLATION%GOBP%GO:0035601	0.0325307	0.139697	-1	PHB,RCOR2,HDAC1,SIN3A,BAZ2A,RCOR1,LYPLAL1,PPT1,RCOR3,BRMS1L,MTA3,SUDS3,SIRT1,ABHD10,SFPQ,MTA1,MIER1,SMARCAD1,HDAC8,SIRT3,RBM14,HDAC5,MORF4L2,ABHD17B,MSL3,HDAC2	-1.47981	-0.463966	26	41
MACROMOLECULE DEACYLATION%GOBP%GO:0098732	MACROMOLECULE DEACYLATION%GOBP%GO:0098732	0.0325307	0.139697	-1	PHB,RCOR2,HDAC1,SIN3A,BAZ2A,RCOR1,LYPLAL1,PPT1,RCOR3,BRMS1L,MTA3,SUDS3,SIRT1,ABHD10,SFPQ,MTA1,MIER1,SMARCAD1,HDAC8,SIRT3,RBM14,HDAC5,MORF4L2,ABHD17B,MSL3,HDAC2	-1.47981	-0.463966	26	41
RAF MAP KINASE CASCADE%REACTOME%R-HSA-5673001.10	RAF MAP KINASE CASCADE%REACTOME%R-HSA-5673001.10	0.0327053	0.140293	1	FGF1,BRAF,PIK3R1,PIK3CA,TLN1,PSME4,FNTB,CAMK2D,RASAL2,PEBP1,ARRB1,PSMF1,CSK,PPP2R5E,PPP2R1A,VCL,ARAF,PPP2R5A,PEA15,YWHAB,RAF1,LAMTOR3,PSMD9,PSME3,BCL2L1,MAPK1,PSMD5,PSMA5,SHC1,FNTA,ACTN2,PSMB6,PPP5C,CAMK2G,NRG1,PSMD4,NEFL,SOS1,PSMA1,CUL3,PSMA7,PSMB3,PSMB4,FYN,RASA1,PDE6D,UBA52	1.30439	0.304029	47	138
ERK1 ERK2 PATHWAY%REACTOME%R-HSA-5684996.4	ERK1 ERK2 PATHWAY%REACTOME%R-HSA-5684996.4	0.0328924	0.140942	1	FGF1,BRAF,PIK3R1,PIK3CA,TLN1,PSME4,FNTB,CAMK2D,RASAL2,PTPN11,PEBP1,ARRB1,PSMF1,CSK,PPP2R5E,PPP2R1A,VCL,ARAF,PPP2R5A,PEA15,YWHAB,RAF1,LAMTOR3,PSMD9,PSME3,BCL2L1,MAPK1,PSMD5,PSMA5,SHC1,FNTA,ACTN2,PSMB6,PPP5C,CAMK2G,NRG1,PSMD4,NEFL,SOS1,PSMA1,CUL3,PSMA7,PSMB3,PSMB4,FYN,RASA1,PDE6D,UBA52	1.30828	0.304117	48	141
UROKINASE-TYPE PLASMINOGEN ACTIVATOR (UPA) AND UPAR-MEDIATED SIGNALING%PATHWAY INTERACTION DATABASE NCI-NATURE CURATED DATA%UROKINASE-TYPE PLASMINOGEN ACTIVATOR (UPA) AND UPAR-MEDIATED SIGNALING	UROKINASE-TYPE PLASMINOGEN ACTIVATOR (UPA) AND UPAR-MEDIATED SIGNALING%PATHWAY INTERACTION DATABASE NCI-NATURE CURATED DATA%UROKINASE-TYPE PLASMINOGEN ACTIVATOR (UPA) AND UPAR-MEDIATED SIGNALING	0.032967	0.141108	-1	PLAUR,LRP1,FN1,NCL,VTN,FGG,RAC1,SERPINE1,SRC	-1.52349	-0.55319	9	21
RECRUITMENT OF NUMA TO MITOTIC CENTROSOMES%REACTOME%R-HSA-380320.2	RECRUITMENT OF NUMA TO MITOTIC CENTROSOMES%REACTOME%R-HSA-380320.2	0.0330789	0.141432	1	PCM1,TUBA1A,SSNA1,OFD1,CEP135,TUBB,PPP2R1A,DYNC1H1,TUBB4B,HSP90AA1,CEP131,ACTR1A,TUBGCP5,PAFAH1B1,TUBGCP3,CDK5RAP2,YWHAE,PRKACA,CSNK1E,CDK1,DYNC1I2,NDE1,CLASP1,PCNT,NME7,DCTN3,MAPRE1,CEP290,PRKAR2B,CNTRL,HAUS5,TUBGCP4,DCTN2,CEP41,HAUS8,HAUS3,TUBGCP6	1.407	0.376602	37	60
AURKA ACTIVATION BY TPX2%REACTOME DATABASE ID RELEASE 77%8854518	AURKA ACTIVATION BY TPX2%REACTOME DATABASE ID RELEASE 77%8854518	0.0333424	0.142281	1	PCM1,TUBA1A,SSNA1,OFD1,CEP135,TUBB,PPP2R1A,DYNC1H1,TUBB4B,HSP90AA1,CEP131,ACTR1A,PAFAH1B1,CDK5RAP2,YWHAE,PRKACA,CSNK1E,CDK1,DYNC1I2,NDE1,CLASP1,PCNT,DCTN3,MAPRE1,CEP290,PRKAR2B,CNTRL,HAUS5,DCTN2,CEP41,HAUS8,HAUS3	1.42058	0.387167	32	54
NEURON DIFFERENTIATION%GOBP%GO:0030182	NEURON DIFFERENTIATION%GOBP%GO:0030182	0.0333499	0.142281	-1	LAMA2,LAMB1,THY1,TAOK3,VSTM2L,EPB41L3,LAMC2,STXBP1,EFNB3,BSG,FOLR1,LAMA3,LAMA5,SLC4A7,BMP7,IRX4,LAMA1,EPHB2,STX3,AGRN,RAB13,NRP2,ERCC2,FARP2,SEMA4B,ANK3,ATP7A,LYN,IQGAP1,JAG2,ACSL3,THOC2,PITX3,PBX3,NRP1,WNT11,PAK1,S100A6,SEMA4D,HAND2,LMTK2,PLXND1,SDK2,UGDH,SEMA3C,MYO6,NCAM1,FARP1,SEMA4C,VAPA,CTNNB1,DTNB,NOTCH3,NPTN,PBX2,PQBP1,FLRT3,RAB10,ALCAM,ZNF335,SIN3A,KIF5C,RPS6KA5,RHOG,ROBO2,RAC1	-1.26761	-0.303069	66	293
ORGANIC HYDROXY COMPOUND TRANSPORT%GOBP%GO:0015850	ORGANIC HYDROXY COMPOUND TRANSPORT%GOBP%GO:0015850	0.0336215	0.143223	-1	SLC6A4,CLU,APOA1,LIPG,STRA6,ABCA8,LIMA1,SLC16A7,PIP4K2A,LDLRAP1,RALBP1,CD36,CAV1,SYT7,AQP1,STX12,SLC16A1,SLC26A6	-1.4875	-0.471404	18	39
LIPOPROTEIN METABOLISM%REACTOME%R-HSA-174824.4	LIPOPROTEIN METABOLISM%REACTOME%R-HSA-174824.4	0.0336436	0.143223	-1	APOA1,AP2M1,AP2A2,LIPG,ANGPTL4,FURIN,A2M,LDLRAP1,PCSK6,PCSK5,AP2B1	-1.4923	-0.486429	11	34
ENDOCARDIAL CUSHION DEVELOPMENT%GOBP%GO:0003197	ENDOCARDIAL CUSHION DEVELOPMENT%GOBP%GO:0003197	0.0338515	0.143951	-1	ENG,BMP7,HEY2,CRELD1,ROBO2,NOG,RBPJ,TBX20,BMP5	-1.54212	-0.595926	9	16
PLATELET HOMEOSTASIS%REACTOME%R-HSA-418346.2	PLATELET HOMEOSTASIS%REACTOME%R-HSA-418346.2	0.0340816	0.144773	-1	GNG5,ATP2B1,GNB4,ITPR1,ITPR3,GNB1,GNAS,P2RX4,GNB2,ATP2B4	-1.4887	-0.482267	10	35
POSITIVE REGULATION OF CELL-MATRIX ADHESION%GOBP%GO:0001954	POSITIVE REGULATION OF CELL-MATRIX ADHESION%GOBP%GO:0001954	0.0341866	0.145062	-1	THY1,JUP,SFRP1,NRP1,S100A10,UTRN,CDK6,CIB1,RAC1,CD36	-1.5019	-0.529771	10	24
EMBRYO DEVELOPMENT ENDING IN BIRTH OR EGG HATCHING%GOBP%GO:0009792	EMBRYO DEVELOPMENT ENDING IN BIRTH OR EGG HATCHING%GOBP%GO:0009792	0.034273	0.145221	-1	MYH6,COL2A1,KIAA1217,FOLR1,BMP7,ADAM10,HEY2,TCOF1,COL1A1,KDM2B,NASP,WNT11,NKX2-5,PDGFB,NOLC1,SEMA4C,CTNNB1,CHRD,IGF2,HOXB4,FUT8,PCSK5,NOG,RBPJ	-1.39054	-0.386263	24	83
CROSS-PRESENTATION OF SOLUBLE EXOGENOUS ANTIGENS (ENDOSOMES)%REACTOME%R-HSA-1236978.1	CROSS-PRESENTATION OF SOLUBLE EXOGENOUS ANTIGENS (ENDOSOMES)%REACTOME%R-HSA-1236978.1	0.034298	0.145221	1	PSME4,PSMF1,PSMD9,PSME3,PSMD5,PSMA5,PSMB6,PSMD4,PSMA1,PSMA7,PSMB3,PSMB4	1.45928	0.426546	12	40
CELLULAR COMPONENT MORPHOGENESIS%GOBP%GO:0032989	CELLULAR COMPONENT MORPHOGENESIS%GOBP%GO:0032989	0.0344916	0.145783	-1	MYH6,LAMA2,BMP10,TAOK3,GPC1,VSTM2L,EPB41L3,LAMC2,STXBP1,EFNB3,BSG,NEBL,LAMA3,LAMA5,BMP7,LAMA1,EPHB2,TMOD1,CD9,NRP2,TCAP,MYH3,SEMA4B,ANK3,ATP7A,IQGAP1,NRP1,PAK1,S100A6,SEMA4D,LMTK2,PLXND1,TMOD3,SEMA3C,NCAM1,FARP1,CSRP1,SEMA4C,CTNNB1,TTN,NOTCH3,NPTN,FLRT3,MYOM2,PNPT1,RAB10,ALCAM,ZNF335,KIF5C,RPS6KA5,RHOG,ROBO2,RAC1,BAIAP2	-1.28275	-0.314818	54	218
HOMEOSTATIC PROCESS%GOBP%GO:0042592	HOMEOSTATIC PROCESS%GOBP%GO:0042592	0.0345315	0.145783	-1	TXNRD2,LAMA2,XKR8,PCK2,STC1,THY1,CYBRD1,ATP1A2,ATP2B1,LAMC1,ATP1B1,ATP1A1,F11R,SLC4A8,HK2,SLC9A1,OCLN,ATP1B2,ANO6,SLC4A7,ITPR1,MFHAS1,RCN3,SLC39A10,SLC2A1,DOCK11,WFS1,SLC39A6,APOA1,CD55,TJP1,TCIRG1,LPAR2,METRNL,DCN,PDK3,CACNB3,ITPR3,ANK3,ATP7A,OCIAD2,LYN,P2RX4,CXADR,LIPG,PYGL,LYAR,ANGPTL4,CHERP,CRY2,HACD3,GLS,LIMA1,CACNA1C,WNK2,ATP1B3,STOML2,STK11,PML,STC2,NPTN,KRIT1,ATP2B4,LDLRAP1,HEPH,FKBP1B,VA…	-1.24101	-0.289812	85	402
PROTEIN DEACETYLATION%GOBP%GO:0006476	PROTEIN DEACETYLATION%GOBP%GO:0006476	0.0345732	0.145783	-1	PHB,RCOR2,HDAC1,SIN3A,BAZ2A,RCOR1,RCOR3,BRMS1L,MTA3,SUDS3,SIRT1,SFPQ,MTA1,MIER1,SMARCAD1,HDAC8,SIRT3,RBM14,HDAC5,MORF4L2,MSL3,HDAC2	-1.48754	-0.481894	22	35
HISTONE DEACETYLATION%GOBP%GO:0016575	HISTONE DEACETYLATION%GOBP%GO:0016575	0.0345793	0.145783	-1	PHB,RCOR2,HDAC1,SIN3A,BAZ2A,RCOR1,RCOR3,BRMS1L,MTA3,SUDS3,SIRT1,SFPQ,MTA1,MIER1,SMARCAD1,HDAC8,RBM14,HDAC5,MORF4L2,MSL3,HDAC2	-1.47972	-0.490527	21	32
PROTEIN N-LINKED GLYCOSYLATION%GOBP%GO:0006487	PROTEIN N-LINKED GLYCOSYLATION%GOBP%GO:0006487	0.0347019	0.146017	-1	MGAT1,NUDT14,MGAT4C,ALG2,B4GALT1,FUT8,ST3GAL1,UGGT2,ALG5,UGGT1,GFPT2,MGAT5,MGAT4B	-1.48563	-0.476967	13	37
IN UTERO EMBRYONIC DEVELOPMENT%GOBP%GO:0001701	IN UTERO EMBRYONIC DEVELOPMENT%GOBP%GO:0001701	0.0347094	0.146017	-1	MYH6,BMP7,ADAM10,HEY2,NASP,PDGFB,IGF2,FUT8,RBPJ,TGFBR1	-1.50308	-0.534866	10	23
VIRAL PROTEIN PROCESSING%GOBP%GO:0019082	VIRAL PROTEIN PROCESSING%GOBP%GO:0019082	0.0349958	0.147065	-1	MGAT1,MGAT4C,ST3GAL4,FURIN,FUT8,ST3GAL1,MGAT5,CANX,MGAT4B	-1.51271	-0.549274	9	21
LYMPHOCYTE ACTIVATION%GOBP%GO:0046649	LYMPHOCYTE ACTIVATION%GOBP%GO:0046649	0.0357569	0.150102	-1	CADM1,ICAM1,HELLS,ADAM17,EPHB2,DOCK11,CD44,PHB,ATP7A,JAG2,CXADR,STOML2,AXL,HLA-A,IFNA8,VAMP7,TPD52,TCF3,KIF13B,INS,EXOSC6,LRRC8A,ZBTB7A,PBX1,AKAP17A,SCRIB,EXOSC3,MSH6,DNAJB9,CD276,PHB2	-1.38657	-0.38612	31	82
POSITIVE REGULATION OF CALCIUM ION TRANSMEMBRANE TRANSPORTER ACTIVITY%GOBP%GO:1901021	POSITIVE REGULATION OF CALCIUM ION TRANSMEMBRANE TRANSPORTER ACTIVITY%GOBP%GO:1901021	0.0358423	0.150167	-1	CACNB2,ATP1B1,SLC9A1,CACNB3	-1.51926	-0.572356	4	18
REGULATION OF SODIUM ION TRANSMEMBRANE TRANSPORT%GOBP%GO:1902305	REGULATION OF SODIUM ION TRANSMEMBRANE TRANSPORT%GOBP%GO:1902305	0.0358487	0.150167	-1	ATP1A2,TESC,ATP1B1,SLC9A1,ATP1B2,FXYD1,FGF13,SLC9A3R1,DLG1,ANK3,WNK2,ATP1B3,ATP2B4,FXYD6	-1.48141	-0.486939	14	33
ROOF OF MOUTH DEVELOPMENT%GOBP%GO:0060021	ROOF OF MOUTH DEVELOPMENT%GOBP%GO:0060021	0.035924	0.150322	-1	COL11A2,LOXL3,EPHB2,WNT11	-1.52709	-0.590118	4	16
ESTABLISHMENT OF PROTEIN LOCALIZATION TO MITOCHONDRION%GOBP%GO:0072655	ESTABLISHMENT OF PROTEIN LOCALIZATION TO MITOCHONDRION%GOBP%GO:0072655	0.0360853	0.150836	1	TIMM17A,MFN2,CHCHD4,TIMM8B,TIMM13,HSP90AA1,TOMM34,MOAP1,TIMM50,TOMM7,TIMM23,MIPEP,HK1,TOMM22,MFF,TIMM17B,TOMM40,TIMM44,DNLZ,TIMM10B,FIS1,ROMO1,SAMM50,BCS1L	1.42853	0.395082	24	51
NEURAL CREST CELL MIGRATION%GOBP%GO:0001755	NEURAL CREST CELL MIGRATION%GOBP%GO:0001755	0.0361836	0.151086	-1	FOLR1,FN1,SEMA4B,NRP1,SEMA4D,SEMA3C,SEMA4C,RADIL	-1.51607	-0.571156	8	18
NUCLEOTIDE METABOLISM%REACTOME%R-HSA-15869.5	NUCLEOTIDE METABOLISM%REACTOME%R-HSA-15869.5	0.0363073	0.151441	1	NME2,AK1,NUDT16,ENTPD4,NT5C2,ADSL,DCTPP1,GLRX,NUDT5,DHODH,PFAS,PPAT,NUDT15,GART,NME1,ADAL,NT5C,TXNRD1,TYMS,TXN,CTPS2,ITPA,TK1,UCKL1,PAICS,UCK2,CTPS1,ATIC,RRM1,CAD,ENTPD5	1.4125	0.381022	31	58
TAK1 ACTIVATES NFKB BY PHOSPHORYLATION AND ACTIVATION OF IKKS COMPLEX%REACTOME DATABASE ID RELEASE 77%445989	TAK1 ACTIVATES NFKB BY PHOSPHORYLATION AND ACTIVATION OF IKKS COMPLEX%REACTOME DATABASE ID RELEASE 77%445989	0.0365591	0.15233	1	UBE2N,TRAF6,IRAK1,NKIRAS2,NFKB1,IKBKB,TAB2,NKIRAS1,UBE2V1	1.55108	0.55797	9	17
HALLMARK_COMPLEMENT%MSIGDB_C2%HALLMARK_COMPLEMENT	HALLMARK_COMPLEMENT%MSIGDB_C2%HALLMARK_COMPLEMENT	0.0366158	0.152404	-1	ADRA2B,CLU,CPM,GNB4,DOCK9,PLAUR,FDX1,GNAI3,CD55,GCA,LYN,MMP14,GNB2,CD59,SERPINA1,TFPI2,ADAM9,COL4A2,SERPINE1,CD36,SRC,ME1,PLAT	-1.42413	-0.421573	23	57
CELLULAR DIVALENT INORGANIC CATION HOMEOSTASIS%GOBP%GO:0072503	CELLULAR DIVALENT INORGANIC CATION HOMEOSTASIS%GOBP%GO:0072503	0.0368248	0.153111	-1	STC1,THY1,ATP1A2,ATP2B1,ATP1B1,ITPR1,SLC39A10,WFS1,SLC39A6,CD55,LPAR2,CACNB3,ITPR3,P2RX4,CHERP,CACNA1C,STOML2,PML,STC2,NPTN,ATP2B4,FKBP1B,VAPB,SLC25A23,CACNA2D1,HRC,HSP90B1,FGF2,JPH1,CD36,CAV1,S100A8,PDZD8,CAPN3,ATP2C1,TGM2,PSEN1	-1.36163	-0.364604	37	106
LYSOSOME ORGANIZATION%GOBP%GO:0007040	LYSOSOME ORGANIZATION%GOBP%GO:0007040	0.0369895	0.153385	1	HOOK2,TFEB,CHMP3,GBA,TPP1,CLN5,ARSB,LAMTOR1,AKTIP,MTOR,GRN,VPS33A,VPS18,ZKSCAN3	1.45884	0.44454	14	33
LYTIC VACUOLE ORGANIZATION%GOBP%GO:0080171	LYTIC VACUOLE ORGANIZATION%GOBP%GO:0080171	0.0369895	0.153385	1	HOOK2,TFEB,CHMP3,GBA,TPP1,CLN5,ARSB,LAMTOR1,AKTIP,MTOR,GRN,VPS33A,VPS18,ZKSCAN3	1.45884	0.44454	14	33
NEGATIVE REGULATION OF TRANSMEMBRANE RECEPTOR PROTEIN SERINE/THREONINE KINASE SIGNALING PATHWAY%GOBP%GO:0090101	NEGATIVE REGULATION OF TRANSMEMBRANE RECEPTOR PROTEIN SERINE/THREONINE KINASE SIGNALING PATHWAY%GOBP%GO:0090101	0.0370077	0.153385	-1	FBN2,PRDM16,FBN1,PEG10,ADAM17,CD109,LRP1,GREM2,CILP,BMPER,SPRY1,SNX25,VASN,EMILIN1,MAGI2,CHRD	-1.44999	-0.441347	16	48
'DE NOVO' PROTEIN FOLDING%GOBP%GO:0006458	'DE NOVO' PROTEIN FOLDING%GOBP%GO:0006458	0.0372058	0.153852	1	DNAJC7,DNAJB5,HSPA8,CHCHD4,DNAJB12,HSPA14,GAK,HSPE1,FKBP1A,HSPA9,HSPA2,HSPA6,DNAJB1,HSPA5,ST13,CCT2,ENTPD5,DNAJC2	1.47498	0.459248	18	30
NEUREXINS AND NEUROLIGINS%REACTOME DATABASE ID RELEASE 77%6794361	NEUREXINS AND NEUROLIGINS%REACTOME DATABASE ID RELEASE 77%6794361	0.0372179	0.153852	-1	EPB41L1,EPB41L3,STXBP1,EPB41L2,LIN7C,EPB41	-1.50335	-0.539405	6	22
REGULATION OF CALCIUM ION TRANSPORT%GOBP%GO:0051924	REGULATION OF CALCIUM ION TRANSPORT%GOBP%GO:0051924	0.0372381	0.153852	-1	STC1,THY1,ATP1A2,CACNB2,ATP2B1,ATP1B1,SLC9A1,EPB41,WFS1,CACNB3,PACSIN3,P2RX4,PDGFB,CACNA1C,NOS1AP,CAMK2B,CTNNB1,PML,FKBP1B,TRIM27,CACNA2D1,HRC,JPH1,CAV1	-1.40179	-0.39696	24	74
FATTY ACID DERIVATIVE METABOLIC PROCESS%GOBP%GO:1901568	FATTY ACID DERIVATIVE METABOLIC PROCESS%GOBP%GO:1901568	0.037845	0.156114	-1	GGT3P,ACSS3,HSD17B12,ACSL3,NUDT19,HMGCL,HACD2,ACSL4,PPT1,HACD1,SLC25A1,ACSF3	-1.47607	-0.496054	12	30
OXOACID METABOLIC PROCESS%GOBP%GO:0043436	OXOACID METABOLIC PROCESS%GOBP%GO:0043436	0.0378651	0.156114	-1	GGT3P,PCK2,LDHD,SLC27A3,ACOT1,ARG2,PLOD2,HK2,CPS1,GATM,GLDC,SARDH,LIAS,MAT1A,SDHA,CYP27A1,ENO2,SLC2A3,PTS,AMT,L2HGDH,SLC2A1,TPST1,TARS2,TECRL,BCAT1,ACSF2,ALDH6A1,ATP7A,LIPH,DEGS1,ACSL3,LIPG,THAP4,SULT1A2,ME3,HACD3,PFKL,ENO1,GLS,ALDH18A1,NUDT19,UGDH,TST,CYP2S1,SHMT2,CBR4,OAT,AASS,LDHA,PAPSS2,TPST2,EHHADH,SGPL1,HMGCL,LIPT1,ACADS,SCPEP1,OXSM,GLYAT,LIPT2,HACD2,PDHX,FOXK2,PHYH,BCKDHB,ST3GAL1,CD36,NARS…	-1.24347	-0.292673	80	359
REGULATION OF SMOOTH MUSCLE CELL PROLIFERATION%GOBP%GO:0048660	REGULATION OF SMOOTH MUSCLE CELL PROLIFERATION%GOBP%GO:0048660	0.0379443	0.156276	-1	PHB,MMP2,JUN,PDGFB,ADAMTS1,CTNNB1,IGFBP5,THBS1,LDLRAP1,PDCD4,FGF2,XRCC5,XRCC6,IGFBP3,CDKN1B	-1.46751	-0.465067	15	39
REGULATION OF CYTOKINE PRODUCTION%GOBP%GO:0001817	REGULATION OF CYTOKINE PRODUCTION%GOBP%GO:0001817	0.0380328	0.156329	-1	CADM1,SERPINB1,ATP2B1,CLU,ARG2,BTN2A1,IFI16,ADAM17,EPHB2,APOA1,ITGB6,CD55,PHB,FN1,SIRPA,LYN,BST2,NOD1,ARNT,DDX58,TRAF3IP1,STOML2,FLOT1,FURIN,AXL,AGPAT2,SETD2,GBP1,HLA-A,THBS1,NPTN,PQBP1,FRMD8,PDCD4,TMED10,IGF2BP2,RPS6KA5,TRIM27,CHID1,RAC1,POLR3F,SERPINE1,GAS6,CD36,YY1,CACTIN,POLR3D,AGT,DHX33	-1.28926	-0.319753	49	196
POSITIVE REGULATION OF CELL-SUBSTRATE ADHESION%GOBP%GO:0010811	POSITIVE REGULATION OF CELL-SUBSTRATE ADHESION%GOBP%GO:0010811	0.0380366	0.156329	-1	THY1,JUP,APOA1,FN1,NPNT,SFRP1,NRP1,PDGFB,FGG,S100A10,UTRN,CDK6,CIB1,RAC1,CD36,RREB1,RAC3,FBLN2,CDC42,RRAS	-1.43723	-0.434846	20	50
REGULATION OF SYSTEM PROCESS%GOBP%GO:0044057	REGULATION OF SYSTEM PROCESS%GOBP%GO:0044057	0.0381659	0.156696	-1	MYH6,DSG2,STC1,BMP10,ATP1A2,CACNB2,DSC2,ATP2B1,ATP1B1,ATP1A1,SLC9A1,DSP,ATP1B2,FXYD1,CTNNA3,EPB41,JUP,FGF13,STX1B,APOA1,DLG1,PARP1,P2RX4,CXADR,HAND2,NKX2-5,ENO1,PDGFB,CACNA1C,NOS1AP,CAMK2B,MYBPC3,FGG,ATP2B4,KCNQ1,FKBP1B,DES,CACNA2D1,HRC,TMEM65,MYL3,GAS6,CAV1,AGT,TRIM63,MYL4,TNNC1,INPP5K	-1.30666	-0.331113	48	163
SYNDECAN INTERACTIONS%REACTOME%R-HSA-3000170.2	SYNDECAN INTERACTIONS%REACTOME%R-HSA-3000170.2	0.0382318	0.156802	-1	ITGA6,TNC,SDC3,VTN,THBS1,FGF2,SDC4,ITGA2,TGFB1,CASK	-1.50861	-0.568343	10	18
POSITIVE REGULATION OF RESPONSE TO CYTOKINE STIMULUS%GOBP%GO:0060760	POSITIVE REGULATION OF RESPONSE TO CYTOKINE STIMULUS%GOBP%GO:0060760	0.0383142	0.156976	-1	ADAM17,DDX58,AXL,AGPAT2,GAS6	-1.52911	-0.600351	5	15
PROTEIN-LIPID COMPLEX SUBUNIT ORGANIZATION%GOBP%GO:0071825	PROTEIN-LIPID COMPLEX SUBUNIT ORGANIZATION%GOBP%GO:0071825	0.0385147	0.157633	-1	APOA1,ACSL3,LIPG,SNX9,AGT	-1.52013	-0.58743	5	16
MORPHOGENESIS OF AN EPITHELIAL SHEET%GOBP%GO:0002011	MORPHOGENESIS OF AN EPITHELIAL SHEET%GOBP%GO:0002011	0.0385847	0.157718	-1	LIN7C,BMP7,ADAM17,COL5A1,CD44,FLRT3,RHOA	-1.49272	-0.531178	7	23
NEGATIVE REGULATION OF TRANSLATION%GOBP%GO:0017148	NEGATIVE REGULATION OF TRANSLATION%GOBP%GO:0017148	0.0386252	0.157718	1	SAMD4A,DAPK3,YTHDF3,DHFR,EIF3E,AGO4,YTHDF2,DAPK1,FXR2,CPEB2,LSM1,EIF2S1,MALSU1,LARP1,YBX1,AGO2,RC3H1,CAPRIN1,NANOS1,EIF2AK3,UPF1,CNOT10,DIS3L2,CNOT7,CPEB4,EIF6,RBM24,EXOSC8,TYMS,PATL1,CNOT2,GIGYF2,GAPDH,ZC3H12A,ZFP36L1,RPS3,TNRC6A,CNOT1	1.32314	0.320514	38	105
CLEC7A (DECTIN-1) SIGNALING%REACTOME DATABASE ID RELEASE 77%5607764	CLEC7A (DECTIN-1) SIGNALING%REACTOME DATABASE ID RELEASE 77%5607764	0.038656	0.157718	1	CDC34,PSME4,UBE2N,TRAF6,PSMF1,UBE2D1,PSMD9,PSME3,PSMD5,NFKB1,PSMA5,PPP3CB,PSMB6,IKBKB,TAB2,UBA3,PSMD4,PSMA1,PSMA7,UBE2V1,PSMB3,PSMB4,UBA52	1.37583	0.357004	23	72
POSITIVE REGULATION OF EPITHELIAL CELL PROLIFERATION%GOBP%GO:0050679	POSITIVE REGULATION OF EPITHELIAL CELL PROLIFERATION%GOBP%GO:0050679	0.0387657	0.157841	-1	NRAS,LAMB1,LAMC1,EGFL7,ADAM17,NRP2,MYDGF,SFRP1,SP1,NRP1,HRAS,PDGFB,ARNT,ECM1,IGF2,FGF2,RREB1,TGFBR1	-1.4175	-0.417772	18	58
MAPK6 MAPK4 SIGNALING%REACTOME%R-HSA-5687128.3	MAPK6 MAPK4 SIGNALING%REACTOME%R-HSA-5687128.3	0.0387665	0.157841	1	CDC42EP3,PSME4,AGO4,PSMF1,HSPB1,PSMD9,PSME3,PSMD5,FOXO1,AGO2,PSMA5,PSMB6,PSMD4,PSMA1,PSMA7,PSMB3,PSMB4,UBA52,FOXO3,TNRC6A,PRKACA,CDK1,PSMA6,DNAJB1,PSMD11	1.36939	0.359176	25	68
PID_IGF1_PATHWAY%MSIGDB_C2%PID_IGF1_PATHWAY	PID_IGF1_PATHWAY%MSIGDB_C2%PID_IGF1_PATHWAY	0.038878	0.158131	1	PIK3R1,PIK3CA,PTPN11,NCK2,RAF1,SHC1,BAD,SOS1,PRKD1	1.50624	0.505294	9	22
CELL AGING%GOBP%GO:0007569	CELL AGING%GOBP%GO:0007569	0.0390687	0.158742	-1	CHEK2,HMGA1,HRAS,PRKCD,PML,PDCD4,SMC6,SERPINE1,CDKN1B,NSMCE2,SMC5,TP53,SIRT1,WRN,TERF2,MORC3,CALR,KAT6A	-1.46195	-0.458366	18	41
BCR SIGNALING PATHWAY%PATHWAY INTERACTION DATABASE NCI-NATURE CURATED DATA%BCR SIGNALING PATHWAY	BCR SIGNALING PATHWAY%PATHWAY INTERACTION DATABASE NCI-NATURE CURATED DATA%BCR SIGNALING PATHWAY	0.0392408	0.159252	1	PIK3R1,PIK3CA,PTEN,TRAF6,CSK,RAF1,MAPK1,NFKB1,SHC1,PPP3CB,PAG1,IKBKB,CAMK2G,SOS1,RASA1,MAPK14	1.44603	0.43426	16	35
POSITIVE REGULATION OF PROTEIN PHOSPHORYLATION%GOBP%GO:0001934	POSITIVE REGULATION OF PROTEIN PHOSPHORYLATION%GOBP%GO:0001934	0.0392753	0.159252	-1	ADRA2B,BMP10,TAOK3,CLU,KRAS,ENG,ARHGEF5,BMP7,PLAUR,ADAM17,STRADB,GDF15,CSPG4,RAP2C,CD44,PHB,MYDGF,LYN,IQGAP1,RALB,CCNY,NRP1,PAK1,HRAS,SEMA4D,VTN,PDGFB,OSBPL8,FLOT1,SNX9,MAD2L2,ERBB3,STK11,PRKCD,PAK4,THBS1,NPTN,ATP2B4,IGF2,PDGFC,TNFRSF10B,TERF2IP,IFNA8,RALBP1,RHOA,ADAM9,RPS6KA5,RAP1A,CIB1,FGF2,RAC1,XRCC5,GAS6,SRC,STK3,SDCBP,XRCC6,CAV1,TGFBR1,AGT,ITGB1BP1,LEFTY2,TFRC,TPX2,TWSG1,INS,SRCIN1,INHBE,TP5…	-1.26457	-0.307285	79	241
DISASSEMBLY OF THE DESTRUCTION COMPLEX AND RECRUITMENT OF AXIN TO THE MEMBRANE%REACTOME DATABASE ID RELEASE 77%4641262	DISASSEMBLY OF THE DESTRUCTION COMPLEX AND RECRUITMENT OF AXIN TO THE MEMBRANE%REACTOME DATABASE ID RELEASE 77%4641262	0.0395122	0.160047	1	FZD2,PPP2R5E,PPP2R1A,AMER1,APC,PPP2R5A,DVL2,GSK3B	1.50268	0.517529	8	20
GENERATION OF NEURONS%GOBP%GO:0048699	GENERATION OF NEURONS%GOBP%GO:0048699	0.0395696	0.160114	-1	LAMA2,LAMB1,THY1,METRN,TAOK3,VSTM2L,EPB41L3,LAMC2,STXBP1,EFNB3,BSG,FOLR1,LAMA3,FGF13,LAMA5,SLC4A7,BMP7,IRX4,LAMA1,EPHB2,STX3,AGRN,RAB13,DAB1,NRP2,ERCC2,FARP2,HEY2,SEMA4B,ANK3,ATP7A,LYN,IQGAP1,JAG2,ACSL3,THOC2,PITX3,PBX3,NRP1,WNT11,PAK1,S100A6,SEMA4D,HAND2,LMTK2,PLXND1,SDK2,UGDH,SEMA3C,MYO6,NCAM1,SERPINE2,FARP1,CAMK2B,SEMA4C,VAPA,CTNNB1,DTNB,NOTCH3,NPTN,PBX2,NUMBL,PQBP1,FLRT3,RAB10,ALCAM,ZNF335,SI…	-1.23659	-0.290362	80	370
BLOOD COAGULATION%GOBP%GO:0007596	BLOOD COAGULATION%GOBP%GO:0007596	0.0396963	0.160296	-1	STXBP1,ANO6,GNAQ,PLAUR,GNA12,STXBP3,CD9,FN1,GNAS,GGCX,LMAN1,CD59,CSRP1,AXL,FGG,F13A1,CD36,SRC,RAP2B,PLAT,FIBP	-1.43706	-0.437411	21	48
COAGULATION%GOBP%GO:0050817	COAGULATION%GOBP%GO:0050817	0.0396963	0.160296	-1	STXBP1,ANO6,GNAQ,PLAUR,GNA12,STXBP3,CD9,FN1,GNAS,GGCX,LMAN1,CD59,CSRP1,AXL,FGG,F13A1,CD36,SRC,RAP2B,PLAT,FIBP	-1.43706	-0.437411	21	48
REGULATION OF NERVOUS SYSTEM PROCESS%GOBP%GO:0031644	REGULATION OF NERVOUS SYSTEM PROCESS%GOBP%GO:0031644	0.0397614	0.160394	1	NPTXR,RELN,PTEN,FGF12,GBA,DLGAP4,EIF2AK3,RNF10	1.48115	0.480553	8	25
HALLMARK_MYC_TARGETS_V1%MSIGDB_C2%HALLMARK_MYC_TARGETS_V1	HALLMARK_MYC_TARGETS_V1%MSIGDB_C2%HALLMARK_MYC_TARGETS_V1	0.039889	0.160744	1	PABPC4,KPNA2,RPS10,MRPL23,EIF2S2,CDK4,RPS2,APEX1,EIF2S1,PABPC1,STARD7,RPS5,SRM,VBP1,AIMP2,UBE2E1,EIF4E,ABCE1,GLO1,PCNA,CNBP,RANBP1,ETF1,PA2G4,EIF3D,C1QBP,VDAC3,HSP90AB1,COPS5,RUVBL2,CCT7,TYMS,RPL18,SSBP1,PSMB3,CYC1,RPS6,EIF4A1,TUFM,NOP16,RPS3,AP3S1,CLNS1A,PWP1,MRPL9,RAN,CDK2	1.29372	0.303633	47	130
PID_IFNG_PATHWAY%MSIGDB_C2%PID_IFNG_PATHWAY	PID_IFNG_PATHWAY%MSIGDB_C2%PID_IFNG_PATHWAY	0.04	0.160768	1	PIK3R1,PIK3CA,RAPGEF1,CAMK2D,PTPN11,MAPK1,MTOR,CAMK2G	1.50191	0.517266	8	20
NEURON PROJECTION GUIDANCE%GOBP%GO:0097485	NEURON PROJECTION GUIDANCE%GOBP%GO:0097485	0.0400179	0.160768	-1	LAMA2,VSTM2L,LAMC2,EFNB3,BSG,LAMA3,LAMA5,LAMA1,EPHB2,NRP2,SEMA4B,NRP1,SEMA4D,PLXND1,SEMA3C,NCAM1,SEMA4C,NOTCH3,NPTN,ALCAM,KIF5C,RPS6KA5,RHOG,ROBO2,RAC1	-1.38318	-0.387357	25	79
AXON GUIDANCE%GOBP%GO:0007411	AXON GUIDANCE%GOBP%GO:0007411	0.0400179	0.160768	-1	LAMA2,VSTM2L,LAMC2,EFNB3,BSG,LAMA3,LAMA5,LAMA1,EPHB2,NRP2,SEMA4B,NRP1,SEMA4D,PLXND1,SEMA3C,NCAM1,SEMA4C,NOTCH3,NPTN,ALCAM,KIF5C,RPS6KA5,RHOG,ROBO2,RAC1	-1.38318	-0.387357	25	79
PURINE NUCLEOTIDE CATABOLIC PROCESS%GOBP%GO:0006195	PURINE NUCLEOTIDE CATABOLIC PROCESS%GOBP%GO:0006195	0.0402229	0.161426	1	NUDT16,ENTPD4,NT5C2,PDE4D,NUDT11,NUDT15,NUDT3,NUDT4	1.49776	0.522938	8	19
RESPONSE TO AMINO ACID STARVATION%GOBP%GO:1990928	RESPONSE TO AMINO ACID STARVATION%GOBP%GO:1990928	0.0405704	0.162655	1	TFEB,RRAGC,EIF2S1,LARP1,MAPK1,EIF2AK3,MTOR,DAP,FAS,PRKD1,WDR24,SH3GLB1	1.49732	0.495154	12	23
LOCALIZATION WITHIN MEMBRANE%GOBP%GO:0051668	LOCALIZATION WITHIN MEMBRANE%GOBP%GO:0051668	0.0409284	0.163922	-1	THY1,CACNB2,TESC,ATP1B1,EPB41L3,F11R,STXBP1,BSG,LIN7C,JUP,FGF13,EHD2,TTC7B,CDH1,FLOT2,STX1B,STX3,AGRN,TRAM1,RAB13,SLC9A3R1,MYO1C,SYNE3,CACNB3,DLG1,TSPAN15,PKP3,ANK3,PIP5K1A,PDZD11,EFR3A,ZDHHC14,LMTK2,ATP1B3,FLOT1,MAGI2,RAB8B,KRT18,ZDHHC20,NUP54,SEC61B,MAP7,RAB10,VAMP5,S100A10,RDX,RAP1A,RAC1,RAPGEF6,ARF6,GAS6,NUP155,SDCBP,CAV1,PDZK1,VPS37A,SIL1,LIN7A,SEC62,RAB8A,MMGT1,ITGB1BP1,INPP5K,RAB35,CAPN3,S…	-1.25751	-0.302483	66	273
ACTIN FILAMENT-BASED MOVEMENT%GOBP%GO:0030048	ACTIN FILAMENT-BASED MOVEMENT%GOBP%GO:0030048	0.0409836	0.163976	-1	MYH6,CACNB2,ATP1A1,MYO1C,MYH8,MYH3,MYO1D,MYO1B,CACNA1C,MYO6,KCNJ8,MYL6B,KCNQ1	-1.4184	-0.428106	13	51
PID_ARF6_TRAFFICKING_PATHWAY%MSIGDB_C2%PID_ARF6_TRAFFICKING_PATHWAY	PID_ARF6_TRAFFICKING_PATHWAY%MSIGDB_C2%PID_ARF6_TRAFFICKING_PATHWAY	0.0410913	0.164232	-1	ITGA6,CTNNA1,PIP5K1C,CTNNB1,ARF6,INS,CTNND1,ITGA2	-1.47853	-0.521528	8	24
NEGATIVE REGULATION OF CYTOKINE PRODUCTION%GOBP%GO:0001818	NEGATIVE REGULATION OF CYTOKINE PRODUCTION%GOBP%GO:0001818	0.0411311	0.164232	-1	SERPINB1,ATP2B1,ARG2,APOA1,FN1,SIRPA,BST2,TRAF3IP1,FURIN,AXL,GBP1,THBS1,NPTN,PDCD4,RPS6KA5,TRIM27,CHID1,RAC1,GAS6,YY1,CACTIN	-1.3938	-0.39875	21	69
TRANSITION METAL ION TRANSPORT%GOBP%GO:0000041	TRANSITION METAL ION TRANSPORT%GOBP%GO:0000041	0.0411823	0.164269	-1	CYBRD1,SLC39A10,SLC39A6,ATP7A,LMTK2,HEPH,ABCB6,SLC39A11,TFRC,ATP2C1	-1.47622	-0.502829	10	28
HSP90 CHAPERONE CYCLE FOR SHRS%REACTOME DATABASE ID RELEASE 77%3371497	HSP90 CHAPERONE CYCLE FOR SHRS%REACTOME DATABASE ID RELEASE 77%3371497	0.0413563	0.164795	1	HSPA8,DYNC1H1,ACTR10,HSP90AA1,NR3C1,DCTN5,DYNC1I1,DNAJA1,ACTR1A,CAPZA2,DCTN4,HSP90AB1,DNAJA2,DCTN1,HSPA2,DYNC1I2,DYNC1LI1,DNAJB1	1.43903	0.438503	18	33
BIOCARTA_AGR_PATHWAY%MSIGDB_C2%BIOCARTA_AGR_PATHWAY	BIOCARTA_AGR_PATHWAY%MSIGDB_C2%BIOCARTA_AGR_PATHWAY	0.0414303	0.164923	-1	LAMA4,LAMA3,AGRN,SP1,PAK1,JUN,PAK4,RAC1,DAG1	-1.49743	-0.571269	9	17
PID_UPA_UPAR_PATHWAY%MSIGDB_C2%PID_UPA_UPAR_PATHWAY	PID_UPA_UPAR_PATHWAY%MSIGDB_C2%PID_UPA_UPAR_PATHWAY	0.0416231	0.165523	-1	PLAUR,NCL,VTN,RAC1,SERPINE1,SRC	-1.51388	-0.594371	6	15
PID_BCR_5PATHWAY%MSIGDB_C2%PID_BCR_5PATHWAY	PID_BCR_5PATHWAY%MSIGDB_C2%PID_BCR_5PATHWAY	0.0417827	0.165953	1	PIK3R1,PIK3CA,PTEN,TRAF6,CSK,RAF1,MAPK1,NFKB1,SHC1,PAG1,IKBKB,CAMK2G,SOS1	1.4432	0.445653	13	31
BIOCARTA_GH_PATHWAY%MSIGDB_C2%BIOCARTA_GH_PATHWAY	BIOCARTA_GH_PATHWAY%MSIGDB_C2%BIOCARTA_GH_PATHWAY	0.041816	0.165953	1	PIK3R1,PIK3CA,RAF1,PRKCA,MAPK1,SHC1,SOS1	1.52581	0.548878	7	17
LEPTIN%IOB%LEPTIN	LEPTIN%IOB%LEPTIN	0.0421269	0.167018	1	CFL2,PIK3R1,MAPKAPK2,PTEN,PTPN11,RAF1,MAPK1,NFKB1,ITGB5,GSK3B	1.43661	0.437764	10	33
PROTEIN IMPORT%GOBP%GO:0017038	PROTEIN IMPORT%GOBP%GO:0017038	0.0422665	0.167402	1	RANBP6,TIMM17A,TNPO1,KPNA2,PTTG1IP,TSC2,PRICKLE1,CHCHD4,KPNA1,HSP90AA1,IPO5,PEX12,IPO9,RPL23,IPO13,IPO8,PEX6,APPL1,TIMM50,IPO7,PEX3,IPO4	1.34507	0.337922	22	84
EPO%IOB%EPO	EPO%IOB%EPO	0.0423387	0.16752	1	BRAF,PIK3R1,PTPN11,RAF1,MAPK1,FOXO1,SHC1,PAG1,BAD,GSK3B,MTOR	1.46188	0.465912	11	27
TOLL LIKE RECEPTOR 3 (TLR3) CASCADE%REACTOME DATABASE ID RELEASE 77%168164	TOLL LIKE RECEPTOR 3 (TLR3) CASCADE%REACTOME DATABASE ID RELEASE 77%168164	0.0424107	0.167636	1	UBE2N,DUSP3,MAPKAPK2,UBE2D3,TRAF6,PPP2R1A,TNIP2,UBE2D1,IRAK1,NKIRAS2,MAPK1,NFKB1,RPS6KA3,TRAF3,IKBKB,TAB2,NKIRAS1	1.38303	0.374062	17	57
STRIATED MUSCLE CONTRACTION%REACTOME%R-HSA-390522.1	STRIATED MUSCLE CONTRACTION%REACTOME%R-HSA-390522.1	0.0424891	0.167776	-1	MYH6,TMOD1,MYH8,TCAP,MYH3,TMOD3,MYBPC3,TTN,DES,MYL3,MYL4,TNNC1	-1.4757	-0.515298	12	25
HEDGEHOG LIGAND BIOGENESIS%REACTOME DATABASE ID RELEASE 77%5358346	HEDGEHOG LIGAND BIOGENESIS%REACTOME DATABASE ID RELEASE 77%5358346	0.0428377	0.168983	1	PSME4,PSMF1,PSMD9,PSME3,PSMD5,PSMA5,VCP,PSMB6,PSMD4,PSMA1,PSMA7,PSMB3,PSMB4,UBA52	1.40959	0.393976	14	49
DNA DAMAGE RESPONSE, SIGNAL TRANSDUCTION BY P53 CLASS MEDIATOR%GOBP%GO:0030330	DNA DAMAGE RESPONSE, SIGNAL TRANSDUCTION BY P53 CLASS MEDIATOR%GOBP%GO:0030330	0.0430108	0.169495	-1	CHEK2,SP100,TRIAP1,NDRG1,MYO6,PML,CDKN1B,TP53,ING4	-1.49588	-0.563548	9	18
NEGATIVE REGULATION OF PEPTIDASE ACTIVITY%GOBP%GO:0010466	NEGATIVE REGULATION OF PEPTIDASE ACTIVITY%GOBP%GO:0010466	0.0433101	0.170504	-1	RECK,SERPINB1,SERPINB9,IFI16,PLAUR,TRIAP1,LRP1,CD44,VTN,FABP1,SERPINE2,SERPINA1,THBS1,ECM1,TIMP3,SERPINE1,GAS6,SRC,AGT	-1.39991	-0.41007	19	60
PI3K AKT SIGNALING%REACTOME%R-HSA-1257604.9	PI3K AKT SIGNALING%REACTOME%R-HSA-1257604.9	0.0433772	0.170597	1	FGF1,PIK3R1,PIK3CA,PSME4,PTEN,RRAGC,TSC2,EGR1,AGO4,PTPN11,RRAGA,TRAF6,PSMF1,PPP2R5E,PPP2R1A,IRAK1,WWP2,PPP2R5A,CASP9,STRN,LAMTOR3,PSMD9,PSME3,MAPK1,MKRN1,PSMD5,FOXO1,AGO2,RPTOR,AKT1S1,PSMA5,LAMTOR1,PSMB6,BAD,GSK3B,MTOR,NRG1,PSMD4,CSNK2B,PSMA1,XIAP,PSMA7,RPS6KB2,PSMB3,RICTOR,PSMB4,USP13,AKT3,FYN,UBA52,FOXO3	1.25703	0.285329	51	167
NEGATIVE REGULATION OF MUSCLE CELL DIFFERENTIATION%GOBP%GO:0051148	NEGATIVE REGULATION OF MUSCLE CELL DIFFERENTIATION%GOBP%GO:0051148	0.0435228	0.170998	-1	HEY2,HDAC1,NKX2-5,PDGFB,IGF2,PDCD4	-1.49395	-0.562823	6	18
PROTEIN IMPORT INTO NUCLEUS%GOBP%GO:0006606	PROTEIN IMPORT INTO NUCLEUS%GOBP%GO:0006606	0.0436443	0.171304	1	RANBP6,TNPO1,KPNA2,PTTG1IP,TSC2,PRICKLE1,KPNA1,IPO5,IPO9,RPL23,IPO13,IPO8,APPL1,IPO7,IPO4,KPNA4,RPAIN,TNPO3	1.40586	0.390384	18	50
ORGANIC ACID METABOLIC PROCESS%GOBP%GO:0006082	ORGANIC ACID METABOLIC PROCESS%GOBP%GO:0006082	0.0437965	0.171721	-1	GGT3P,PCK2,LDHD,SLC27A3,ACOT1,ARG2,PLOD2,HK2,CPS1,GATM,GLDC,SARDH,LIAS,MAT1A,SDHA,CYP27A1,ENO2,SLC2A3,PTS,AMT,L2HGDH,SLC2A1,TPST1,TARS2,TECRL,BCAT1,ACSF2,ALDH6A1,ATP7A,LIPH,DEGS1,ACSL3,LIPG,THAP4,SULT1A2,ME3,HACD3,PFKL,ENO1,GLS,ALDH18A1,NUDT19,UGDH,TST,CYP2S1,SHMT2,CBR4,OAT,AASS,LDHA,PAPSS2,TPST2,EHHADH,SGPL1,HMGCL,LIPT1,ACADS,SCPEP1,OXSM,GLYAT,LIPT2,HACD2,PDHX,FOXK2,PHYH,BCKDHB,ST3GAL1,CD36,NARS…	-1.23186	-0.289612	80	364
VEGF SIGNALING PATHWAY%PANTHER PATHWAY%P00056	VEGF SIGNALING PATHWAY%PANTHER PATHWAY%P00056	0.0438381	0.171721	1	TGFB1I1,TGFB1I1,BRAF,BRAF,PIK3R1,PIK3R1,PIK3CA,PIK3CA,ARHGAP1,ARHGAP1,MAPKAPK2,MAPKAPK2,HSPB1,HSPB1,ARAF,ARAF,CASP9,CASP9,RAF1,RAF1,PRKCA,PRKCA,MAPK1,MAPK1,MAPK1	1.34017	0.33757	25	83
BIOCARTA_CERAMIDE_PATHWAY%MSIGDB_C2%BIOCARTA_CERAMIDE_PATHWAY	BIOCARTA_CERAMIDE_PATHWAY%MSIGDB_C2%BIOCARTA_CERAMIDE_PATHWAY	0.0438967	0.171779	1	SMPD1,RAF1,MAPK1,NFKB1,BAD	1.50999	0.561627	5	15
STABILIZATION OF P53%REACTOME%R-HSA-69541.5	STABILIZATION OF P53%REACTOME%R-HSA-69541.5	0.044181	0.17272	1	PSME4,PSMF1,PSMD9,PSME3,PSMD5,PSMA5,PSMB6,PSMD4,PSMA1,PSMA7,PSMB3,PSMB4,UBA52	1.41709	0.404497	13	44
ACTION POTENTIAL%GOBP%GO:0001508	ACTION POTENTIAL%GOBP%GO:0001508	0.0442405	0.17278	-1	ATP1A2,CACNB2,ATP1B1,ATP1A1,GNAQ,ANK3,CACNA1C,KCNJ8,KCNQ1,GNA14,CACNA2D1,GNA11,CNTNAP1	-1.452	-0.470379	13	35
MYELOID LEUKOCYTE ACTIVATION%GOBP%GO:0002274	MYELOID LEUKOCYTE ACTIVATION%GOBP%GO:0002274	0.044291	0.172805	-1	VAMP8,CLU,STXBP2,CD93,STXBP3,ADAM10,PRKCD,ADAM9,VAMP7,SNAP23	-1.46645	-0.517264	10	24
HEMOSTASIS%GOBP%GO:0007599	HEMOSTASIS%GOBP%GO:0007599	0.0443427	0.172835	-1	STXBP1,ANO6,GNAQ,PLAUR,GNA12,STXBP3,CD9,FN1,GNAS,GGCX,LMAN1,CD59,CSRP1,AXL,FGG,F13A1,CD36,SRC,RAP2B,PLAT,FIBP	-1.41937	-0.430649	21	49
D-<I>MYO< I>-INOSITOL (1,4,5)-TRISPHOSPHATE BIOSYNTHESIS%HUMANCYC%PWY-6351	D-<I>MYO< I>-INOSITOL (1,4,5)-TRISPHOSPHATE BIOSYNTHESIS%HUMANCYC%PWY-6351	0.0446966	0.174042	-1	PLCD1,PIP5K1A,PIP5K1C,PI4KA,PIP4K2A,PIP4K2C,PIP4K2B	-1.49106	-0.568839	7	17
RESPONSE TO TEMPERATURE STIMULUS%GOBP%GO:0009266	RESPONSE TO TEMPERATURE STIMULUS%GOBP%GO:0009266	0.0448332	0.174401	1	GLRX2,FGF1,HSP90AB2P,PDCD6,EIF2B3,MICA,HSP90AA1,EIF2B4,FOXO1,EIF2B5,EIF2AK3,VCP,HSP90AB1,HSP90AB4P,ATXN3,YWHAE,EIF2B2,HSPA2,HSF1,PRKACA,HSPA6,EIF2B1	1.40065	0.387372	22	51
DEVELOPMENTAL GROWTH%GOBP%GO:0048589	DEVELOPMENTAL GROWTH%GOBP%GO:0048589	0.0449923	0.174846	-1	STC1,BMP10,CPQ,CD9,NRP2,PTGFRN,GNAS,IQGAP1,STRA6,NRP1,S1PR1,BIN3,MAGI2,CTNNB1,WDR11,FLRT3,ALCAM	-1.40042	-0.407013	17	63
MULTICELLULAR ORGANISMAL HOMEOSTASIS%GOBP%GO:0048871	MULTICELLULAR ORGANISMAL HOMEOSTASIS%GOBP%GO:0048871	0.0451464	0.175272	-1	LAMA2,LAMC1,F11R,OCLN,ATP1B2,RCN3,SLC2A1,WFS1,TJP1,METRNL,P2RX4,CXADR	-1.40031	-0.406981	12	63
TRANSLATION OF STRUCTURAL PROTEINS%REACTOME%R-HSA-9694635.2	TRANSLATION OF STRUCTURAL PROTEINS%REACTOME%R-HSA-9694635.2	0.0452916	0.175662	-1	MGAT1,MGAT4C,ST3GAL4,PARP4,FUT8,ST3GAL1,MGAT5,CANX,MGAT4B,PRKCSH,ST3GAL2,GANAB,SUMO1,MOGS,GSK3A,RPN1	-1.44714	-0.464608	16	37
TRNA METABOLIC PROCESS%GOBP%GO:0006399	TRNA METABOLIC PROCESS%GOBP%GO:0006399	0.0453834	0.175844	1	RPP25L,THUMPD3,PTCD1,WDR6,TRMU,TRMT1,RPUSD4,TSEN34,GATB,OSGEP,TRMT61B,RTCB,TRMT112,RPP38,RARS2,SARS2,PUS3,FARSB,TSEN54,RPP21,EARS2,TYW1,HSD17B10,QRSL1,EXOSC8,MTFMT,THG1L,DDX1,MOCS3,MTO1,HARS2,ZBTB8OS	1.31992	0.327425	32	91
GROWTH%GOBP%GO:0040007	GROWTH%GOBP%GO:0040007	0.0457336	0.177026	-1	STC1,BMP10,CPQ,CD9,NRP2,PTGFRN,GNAS,IQGAP1,STRA6,NRP1,S1PR1,BIN3,MAGI2,CTNNB1,WDR11,FLRT3,ALCAM	-1.39501	-0.404172	17	64
RET SIGNALING%REACTOME%R-HSA-8853659.4	RET SIGNALING%REACTOME%R-HSA-8853659.4	0.046356	0.179259	1	PIK3R1,PIK3CA,PTPN11,PRKCA,SHC1,SOS1,PRKACA,GRB10	1.50809	0.542507	8	17
REGULATION OF IMMUNOGLOBULIN PRODUCTION%GOBP%GO:0002637	REGULATION OF IMMUNOGLOBULIN PRODUCTION%GOBP%GO:0002637	0.0464594	0.179481	-1	EPHB2,PHB,TP53BP1,MAD2L2,THOC1,STX4,TFRC,TGFB1,DNAJB9,PHB2,SUPT6H,RIF1	-1.49511	-0.57776	12	16
SIGNALING BY PDGF%REACTOME%R-HSA-186797.4	SIGNALING BY PDGF%REACTOME%R-HSA-186797.4	0.0466185	0.179919	-1	NRAS,COL4A1,COL6A2,COL4A5,COL6A1,COL6A3,HRAS,PDGFB,FURIN,THBS1,STAT6,COL6A6,COL4A2,SRC	-1.4405	-0.46551	14	36
REGULATION OF TRANSCRIPTION ELONGATION FROM RNA POLYMERASE II PROMOTER%GOBP%GO:0034243	REGULATION OF TRANSCRIPTION ELONGATION FROM RNA POLYMERASE II PROMOTER%GOBP%GO:0034243	0.0468171	0.180508	-1	BRD4,HNRNPU,ZMYND11,CDK12,ELL,NELFB,SUPT16H,CDC73,NELFCD,HEXIM1,NELFA,LARP7,CDK13,NELFE,LEO1,SUPT6H,TCERG1	-1.47814	-0.53036	17	22
REGULATION OF RAC1 ACTIVITY%PATHWAY INTERACTION DATABASE NCI-NATURE CURATED DATA%REGULATION OF RAC1 ACTIVITY	REGULATION OF RAC1 ACTIVITY%PATHWAY INTERACTION DATABASE NCI-NATURE CURATED DATA%REGULATION OF RAC1 ACTIVITY	0.046998	0.181028	1	EPS8,ARHGEF6,RAP1GDS1,ARHGAP1,CHN1,ARHGAP17,ARHGDIA	1.47381	0.494415	7	22
PYRUVATE METABOLIC PROCESS%GOBP%GO:0006090	PYRUVATE METABOLIC PROCESS%GOBP%GO:0006090	0.0474393	0.182508	-1	PCK2,HK2,ENO2,ME3,PFKL,ENO1,LDHA,PDHX,FOXK2,ME1,ALDOC	-1.43609	-0.464082	11	36
SIGNALING BY HEDGEHOG%REACTOME DATABASE ID RELEASE 77%5358351	SIGNALING BY HEDGEHOG%REACTOME DATABASE ID RELEASE 77%5358351	0.0475169	0.182508	1	PSME4,PRKAR1A,SMURF2,ARRB1,OFD1,PSMF1,TTC21B,ITCH,PSMD9,PSME3,PSMD5,PSMA5,VCP,PSMB6,GSK3B,PSMD4,PSMA1,CUL3,PSMA7,IFT57,PSMB3,PSMB4,UBA52,IFT140,PRKACA,PSMA6,WDR19	1.3298	0.334956	27	83
VESICLE FUSION%GOBP%GO:0006906	VESICLE FUSION%GOBP%GO:0006906	0.0475226	0.182508	-1	VAMP8,STXBP1,STX1B,STX3,RAB13,STX17,STX2,SNAP25,RAB8B,PIP4K2A,EEA1,VAMP7,PIP4K2B,BET1,SNAP23,STX4,RAB8A,SYT7,VPS41	-1.39365	-0.41255	19	57
RESPONSE TO OXYGEN-CONTAINING COMPOUND%GOBP%GO:1901700	RESPONSE TO OXYGEN-CONTAINING COMPOUND%GOBP%GO:1901700	0.0475683	0.182508	-1	TXNRD2,GGT3P,PCK2,AHCYL1,ATP1A2,TESC,ATP1A1,ICAM1,CPS1,GLDC,SLC9A1,FOLR1,LIAS,JUP,CDH1,GNAQ,ADAM17,AGRN,RAB13,LRP1,GNAI3,SDF4,PDK3,PARP1,CTNNA1,GNB1,SIRPA,GNAS,ATP7A,LYN,P2RX4,MMP2,SFRP1,SP1,PIK3C2A,WNT11,XRCC1,NOD1,PFKL,PTK7,SHPK,JUN,PDGFB,FABP1,AXL,RAP1B,PRKCD,CTNNB1,RAB8B,MTDH,IGFBP5,THBS1,ATP2B4,KCNQ1,STAT6,RHOQ,UBE3A,IGF2,GNA14,PDCD4,SOD3,ANKZF1,RHOA,RAB10,RXRA,RDH11,ADAM9,DCPS,CACNA2D1,CA2,…	-1.22009	-0.285297	87	394
METABOTROPIC GLUTAMATE RECEPTOR GROUP I PATHWAY%PANTHER PATHWAY%P00041	METABOTROPIC GLUTAMATE RECEPTOR GROUP I PATHWAY%PANTHER PATHWAY%P00041	0.0476832	0.18277	-1	ITPR1,ITPR1,ITPR1,GNAQ,GNAQ,GNAQ	-1.47034	-0.523216	6	23
REGULATION OF WOUND HEALING%GOBP%GO:0061041	REGULATION OF WOUND HEALING%GOBP%GO:0061041	0.0480784	0.184105	-1	OCLN,ANO6,CD109,EPHB2,CD9,ST3GAL4,HRAS,VTN,PDGFB,SERPINE2,PRKCD,THBS1,FGG,FGF2,SERPINE1,RREB1,CAV1,PLAT	-1.4104	-0.429298	18	48
HISTONE MONOUBIQUITINATION%GOBP%GO:0010390	HISTONE MONOUBIQUITINATION%GOBP%GO:0010390	0.0483572	0.184992	-1	KDM2B,WAC,CUL4B,RNF40,CTR9,BMI1,RYBP,CDC73,RNF20,RING1,PAF1,PCGF6	-1.46766	-0.522262	12	23
SENSORY PROCESSING OF SOUND%REACTOME DATABASE ID RELEASE 77%9659379	SENSORY PROCESSING OF SOUND%REACTOME DATABASE ID RELEASE 77%9659379	0.0484889	0.185096	-1	CACNB2,EPB41L1,ATP2B1,EPB41L3,MYO1C,MPP1,EPS8L2,SNAP25,RDX,TWF2,CACNA2D2	-1.45436	-0.495385	11	28
CYTOCHROME COMPLEX ASSEMBLY%GOBP%GO:0017004	CYTOCHROME COMPLEX ASSEMBLY%GOBP%GO:0017004	0.0484925	0.185096	1	COX16,SURF1,UQCC3,UQCC1,COA3,SCO2,COX14,SCO1,HCCS,BCS1L,COX20,TIMM21	1.44257	0.455464	12	28
CELL-SUBSTRATE JUNCTION ASSEMBLY%GOBP%GO:0007044	CELL-SUBSTRATE JUNCTION ASSEMBLY%GOBP%GO:0007044	0.0485257	0.185096	-1	THY1,LAMC1,ITGA6,PLEC,FN1,PIP5K1A	-1.46656	-0.521871	6	23
IGF1 PATHWAY%PATHWAY INTERACTION DATABASE NCI-NATURE CURATED DATA%IGF1 PATHWAY	IGF1 PATHWAY%PATHWAY INTERACTION DATABASE NCI-NATURE CURATED DATA%IGF1 PATHWAY	0.0488911	0.186308	1	PIK3R1,PIK3CA,BCAR1,PTPN11,NCK2,RAF1,SHC1,BAD,SOS1,PRKD1,YWHAE,GRB10,PRKCZ,PXN	1.43924	0.458698	14	27
POSITIVE REGULATION OF TRANSMEMBRANE TRANSPORT%GOBP%GO:0034764	POSITIVE REGULATION OF TRANSMEMBRANE TRANSPORT%GOBP%GO:0034764	0.0491951	0.187285	-1	THY1,CACNB2,TESC,ATP1B1,SLC9A1,OCLN,ATP1B2,FXYD1,ANO6,EPHB2,CACNB3,ANK3,WNK2,ATP1B3,OSBPL8,NOS1AP,KCNQ1,RHOQ,CACNA2D1,CA2	-1.37249	-0.389172	20	73
CD40 CD40L SIGNALING%PATHWAY INTERACTION DATABASE NCI-NATURE CURATED DATA%CD40 CD40L SIGNALING	CD40 CD40L SIGNALING%PATHWAY INTERACTION DATABASE NCI-NATURE CURATED DATA%CD40 CD40L SIGNALING	0.0495305	0.188317	1	PIK3R1,PIK3CA,TRAF6,BCL2L1,NFKB1,TRAF3,MAPK14,MAPK9	1.49606	0.556448	8	15
REGIONALIZATION%GOBP%GO:0003002	REGIONALIZATION%GOBP%GO:0003002	0.0495622	0.188317	-1	HEY2,SFRP1,KDM2B,PBX3,CFC1,MTF2,CHRD,HOXB4,AIDA,PCSK5,NOG,TGFBR1,BMI1,CER1,TDGF1P3,CELSR2,BASP1,TBX20	-1.43892	-0.480711	18	31
REGULATION OF MUSCLE CONTRACTION%GOBP%GO:0006937	REGULATION OF MUSCLE CONTRACTION%GOBP%GO:0006937	0.0497063	0.18851	-1	DSG2,STC1,BMP10,ATP1A2,DSC2,ATP2B1,ATP1B1,SLC9A1,DSP,CTNNA3,JUP,FGF13,DLG1,P2RX4,NKX2-5,ENO1,CACNA1C	-1.3716	-0.389718	17	72
NEGATIVE REGULATION OF IMMUNE EFFECTOR PROCESS%GOBP%GO:0002698	NEGATIVE REGULATION OF IMMUNE EFFECTOR PROCESS%GOBP%GO:0002698	0.0497091	0.18851	-1	SERPINB9,LOXL3,APOA1,CD55,BST2,CD59,HLA-A,A2M,THOC1	-1.45591	-0.503341	9	26
REGULATION OF COLD-INDUCED THERMOGENESIS%GOBP%GO:0120161	REGULATION OF COLD-INDUCED THERMOGENESIS%GOBP%GO:0120161	0.049923	0.189139	-1	LAMA4,GATM,PRDM16,ADAM17,MFAP2,ZNF516,GNAS,PLCL2,THRA,STK11,KDM3A,STAT6,PDGFC,RBPJ,CD36,CAV1,KDM1A,ESRRG,EHMT1,ALDH1A1,LNPEP	-1.38646	-0.402955	21	63
LIPID TRANSPORT%GOBP%GO:0006869	LIPID TRANSPORT%GOBP%GO:0006869	0.0501884	0.189961	-1	XKR8,SLC27A3,CLU,ANO6,TRIAP1,SLC2A1,APOA1,ACSL3,ATP11A,LIPG,STRA6,ABCA8,TMEM30A,LIMA1,OSBPL8	-1.36512	-0.385753	15	75
POSITIVE REGULATION OF IMMUNE EFFECTOR PROCESS%GOBP%GO:0002699	POSITIVE REGULATION OF IMMUNE EFFECTOR PROCESS%GOBP%GO:0002699	0.0504493	0.190765	-1	CADM1,VAMP8,STXBP2,EPHB2,CD55,PHB,LYN,DDX58,TP53BP1,MAD2L2,HLA-A	-1.38333	-0.414368	11	54
SMAD PROTEIN SIGNAL TRANSDUCTION%GOBP%GO:0060395	SMAD PROTEIN SIGNAL TRANSDUCTION%GOBP%GO:0060395	0.0505532	0.190973	-1	BMP10,BMP7,GDF15,JUN,MAGI2,LEFTY2,INHBE,GDF6,TGFB1,BMP5	-1.4697	-0.546743	10	19
REGULATION OF MONONUCLEAR CELL MIGRATION%GOBP%GO:0071675	REGULATION OF MONONUCLEAR CELL MIGRATION%GOBP%GO:0071675	0.0506452	0.191137	-1	MOSPD2,ANO6,ADAM17,ADAM10,LYN,STK10,THBS1,RHOA,SERPINE1,GAS6	-1.42787	-0.455551	10	38
E-CADHERIN SIGNALING IN THE NASCENT ADHERENS JUNCTION%PATHWAY INTERACTION DATABASE NCI-NATURE CURATED DATA%E-CADHERIN SIGNALING IN THE NASCENT ADHERENS JUNCTION	E-CADHERIN SIGNALING IN THE NASCENT ADHERENS JUNCTION%PATHWAY INTERACTION DATABASE NCI-NATURE CURATED DATA%E-CADHERIN SIGNALING IN THE NASCENT ADHERENS JUNCTION	0.0508839	0.19156	-1	JUP,CDH1,TJP1,DLG1,CTNNA1,IQGAP1,PIP5K1C,RAP1B,CTNNB1,RHOA,RAP1A,RAC1,ARF6,SRC,CTNND1,CDC42,AP1M1,WASF2	-1.43531	-0.479505	18	31
P38 MAPK PATHWAY%PANTHER PATHWAY%P05918	P38 MAPK PATHWAY%PANTHER PATHWAY%P05918	0.0509247	0.19156	1	MAPKAPK2,MAPKAPK2,TRAF6,TRAF6,HSPB1,HSPB1,EIF4E,EIF4E,EIF4E,TAB2,TAB2,MAPK14,MAPK14,MAP2K4,MAP2K4,MEF2C,MEF2C,MEF2D,MEF2D,TAB1,TAB1,MAP3K7,MAP3K7	1.39494	0.405868	23	41
GLYCOSAMINOGLYCAN METABOLIC PROCESS%GOBP%GO:0030203	GLYCOSAMINOGLYCAN METABOLIC PROCESS%GOBP%GO:0030203	0.0509422	0.19156	-1	CHST6,CHST14,CHSY1,CD44,ST3GAL4,HS3ST3B1,UGDH,B4GAT1,CHST12,HS3ST1,FGF2,PXYLP1,ST3GAL1,CHST11,TGFB1,EXT2,GLCE,B3GAT3,CHPF,B3GNT2,ST3GAL2,CHST7,HYAL2	-1.41542	-0.442719	23	42
SENSORY PERCEPTION%GOBP%GO:0007600	SENSORY PERCEPTION%GOBP%GO:0007600	0.0509525	0.19156	-1	COL2A1,MARVELD2,COL11A2,WFS1,COL1A1,GNAS,P2RX4,EPS8L2,SFRP5,RP2,ABLIM1,OAT,KCNQ1,BIRC5	-1.38391	-0.406495	14	59
PROTEIN TARGETING%GOBP%GO:0006605	PROTEIN TARGETING%GOBP%GO:0006605	0.0511909	0.192272	1	TIMM17A,HSPA8,HOMER3,TRAK1,MFN2,KATNB1,AKAP6,ZFAND6,RABGEF1,CHCHD4,TIMM8B,GIPC1,TIMM13,HSP90AA1,PEX12,VPS37C,ZFAND2B,TOMM34,AP3D1,RPL11,NCOA4,PEX6,TIMM50,VPS4A,PEX3,TOMM7,AP4S1,SRP54,TIMM23,VPS13D,HGS,PIK3R4,LONP2,MIPEP,TOMM22,MFF,RAB3IP,TIMM17B,TOMM40,CHMP4B,TIMM44,PEX10,SRP72,HACL1,DNLZ,TIMM10B,FIS1,PEX14,YIF1B,ATG3,VPS13C,ROMO1,HSPA5,CDC37,SGTA,SAMM50	1.25934	0.292938	56	139
ESTABLISHMENT OF PROTEIN LOCALIZATION%GOBP%GO:0045184	ESTABLISHMENT OF PROTEIN LOCALIZATION%GOBP%GO:0045184	0.0513023	0.192275	1	RANBP6,RILPL1,TIMM17A,RILP,RABGAP1L,TNPO1,KPNA2,PTTG1IP,BRAF,HSPA8,LRSAM1,VPS35,TBC1D17,RAB3GAP1,HOMER3,TRAK1,MFN2,PARK7,KATNB1,AKAP6,XPO4,RAB3GAP2,LAMP1,ARHGAP1,VPS26B,SEC31A,MCC,TSC2,HERC2,CRIPT,WLS,ZFAND6,CHMP3,RABGEF1,WBP2,PRICKLE1,SNX15,PDCD6,NAPB,TBC1D4,TBC1D8,CHCHD4,KPNA1,TIMM8B,GIPC1,HSPB1,GOLPH3L,PHLDB2,TIMM13,HSP90AA1,IPO5,PEX12,IPO9,RPL23,SNX17,VPS37C,UBL4A,IPO13,ZFAND2B,BAG6,TOMM34,AP…	1.14108	0.232621	121	495
CARBOXYLIC ACID METABOLIC PROCESS%GOBP%GO:0019752	CARBOXYLIC ACID METABOLIC PROCESS%GOBP%GO:0019752	0.0513255	0.192275	-1	GGT3P,PCK2,LDHD,SLC27A3,ACOT1,ARG2,PLOD2,HK2,CPS1,GATM,GLDC,SARDH,LIAS,MAT1A,SDHA,CYP27A1,ENO2,SLC2A3,PTS,AMT,L2HGDH,SLC2A1,TARS2,TECRL,BCAT1,ACSF2,ALDH6A1,ATP7A,LIPH,DEGS1,ACSL3,LIPG,THAP4,ME3,HACD3,PFKL,ENO1,GLS,ALDH18A1,NUDT19,UGDH,TST,CYP2S1,SHMT2,CBR4,OAT,AASS,LDHA,EHHADH,SGPL1,HMGCL,LIPT1,ACADS,SCPEP1,OXSM,GLYAT,LIPT2,HACD2,PDHX,FOXK2,PHYH,BCKDHB,ST3GAL1,CD36,NARS2,PTGES3,VARS2,ME1,ALDOC,BP…	-1.22364	-0.289016	80	345
BINDING AND UPTAKE OF LIGANDS BY SCAVENGER RECEPTORS%REACTOME%R-HSA-2173782.1	BINDING AND UPTAKE OF LIGANDS BY SCAVENGER RECEPTORS%REACTOME%R-HSA-2173782.1	0.0513385	0.192275	-1	COL4A1,COL1A2,COLEC11,LRP1,APOA1,COL1A1,COL4A2,HSP90B1,CD36,COL3A1,COLEC12	-1.46263	-0.53794	11	20
TOR SIGNALING%GOBP%GO:0031929	TOR SIGNALING%GOBP%GO:0031929	0.0515195	0.192768	1	LARP1,RPTOR,CLEC16A,MTOR,CCDC88A,RPS6KB2,RICTOR,RPS6,TIPRL,MLST8,MAPKAP1	1.48807	0.545896	11	16
HEDGEHOG SIGNALING EVENTS MEDIATED BY GLI PROTEINS%PATHWAY INTERACTION DATABASE NCI-NATURE CURATED DATA%HEDGEHOG SIGNALING EVENTS MEDIATED BY GLI PROTEINS	HEDGEHOG SIGNALING EVENTS MEDIATED BY GLI PROTEINS%PATHWAY INTERACTION DATABASE NCI-NATURE CURATED DATA%HEDGEHOG SIGNALING EVENTS MEDIATED BY GLI PROTEINS	0.051772	0.193529	-1	GNAZ,GNAI3,GNB1,GNAI2,HDAC1,RAB23,PRKCD,SIN3A	-1.42621	-0.464886	8	34
TNFR1-INDUCED NFKAPPAB SIGNALING PATHWAY%REACTOME DATABASE ID RELEASE 77%5357956	TNFR1-INDUCED NFKAPPAB SIGNALING PATHWAY%REACTOME DATABASE ID RELEASE 77%5357956	0.0518519	0.193643	1	IKBKB,TAB2,USP4,OTUD7B,RNF31,XIAP,RBCK1,TAB1,MAP3K7	1.48597	0.534548	9	17
SIGNALING EVENTS MEDIATED BY STEM CELL FACTOR RECEPTOR (C-KIT)%PATHWAY INTERACTION DATABASE NCI-NATURE CURATED DATA%SIGNALING EVENTS MEDIATED BY STEM CELL FACTOR RECEPTOR (C-KIT)	SIGNALING EVENTS MEDIATED BY STEM CELL FACTOR RECEPTOR (C-KIT)%PATHWAY INTERACTION DATABASE NCI-NATURE CURATED DATA%SIGNALING EVENTS MEDIATED BY STEM CELL FACTOR RECEPTOR (C-KIT)	0.0521387	0.194529	1	PIK3R1,PIK3CA,PTEN,PTPN11,MITF,RAF1,SHC1,BAD,GSK3B,FER,SOS1,FOXO3,CREBBP,GRB10	1.42224	0.442826	14	30
DETOXIFICATION OF REACTIVE OXYGEN SPECIES%REACTOME DATABASE ID RELEASE 77%3299685	DETOXIFICATION OF REACTIVE OXYGEN SPECIES%REACTOME DATABASE ID RELEASE 77%3299685	0.0523745	0.195029	-1	TXNRD2,GPX7,ATP7A	-1.45841	-0.523281	3	22
DNA REPLICATION PRE-INITIATION%REACTOME%R-HSA-69002.2	DNA REPLICATION PRE-INITIATION%REACTOME%R-HSA-69002.2	0.0523783	0.195029	1	PSME4,PSMF1,PSMD9,PSME3,PSMD5,PSMA5,PSMB6,PSMD4,PSMA1,PSMA7,PSMB3,PSMB4,POLE2,UBA52,POLA1,PSMA6,CDK2,PSMD11,ORC5	1.35242	0.359482	19	62
POSITIVE REGULATION OF CELLULAR PROTEIN CATABOLIC PROCESS%GOBP%GO:1903364	POSITIVE REGULATION OF CELLULAR PROTEIN CATABOLIC PROCESS%GOBP%GO:1903364	0.0524218	0.195029	1	PTTG1IP,VPS35,RNF14,RCHY1,PTEN,NUB1,SIRT2,PRICKLE1,HSP90AA1,AMER1,HECTD1,GBA,ARIH1,BAG6,USP5,ARIH2,VCP,ZYG11B,CCDC22,GSK3B,HSPBP1,KEAP1,ATXN3,USP13,BAG2,DACT1	1.32314	0.333279	26	83
INFLAMMATORY RESPONSE%GOBP%GO:0006954	INFLAMMATORY RESPONSE%GOBP%GO:0006954	0.0527063	0.195902	-1	HSPG2,F11R,LOXL3,LIAS,ANO6,MFHAS1,TPST1,CD44,NOD1,THBS1,PARP4,RAC1,CD36,SNAP23,S100A8,AFAP1L2,INS,HNRNPA0,TGFB1	-1.39667	-0.423759	19	49
REGULATION OF PROTEIN PHOSPHORYLATION%GOBP%GO:0001932	REGULATION OF PROTEIN PHOSPHORYLATION%GOBP%GO:0001932	0.0528244	0.19599	-1	ADRA2B,THY1,BMP10,TAOK3,CLU,KRAS,BRD4,ENG,OCLN,ARHGEF5,BMP7,GNAQ,PLAUR,ADAM17,PTPN13,EPHB2,STRADB,LRP1,SLC9A3R1,GDF15,CSPG4,SPRY3,RAP2C,CD44,PHB,FN1,MYDGF,SIRPA,BMPER,ADAR,SPRY1,MVP,LYN,SNX25,IQGAP1,SFRP1,RALB,CCNY,NRP1,PAK1,EMILIN1,HRAS,SEMA4D,VTN,PDGFB,OSBPL8,TRAF3IP1,GPRC5A,FLOT1,SNX9,MAD2L2,ERBB3,STK11,PRKCD,PAK4,PML,THBS1,TTN,NPTN,TARBP2,ATP2B4,IGF2,PDGFC,PDCD4,TNFRSF10B,TERF2IP,IFNA8,RALBP1…	-1.21159	-0.283123	95	398
ACYL-COA BIOSYNTHETIC PROCESS%GOBP%GO:0071616	ACYL-COA BIOSYNTHETIC PROCESS%GOBP%GO:0071616	0.0528798	0.19599	-1	HSD17B12,ACSL3,HACD2,PDHX,ACSL4,PPT1,HACD1,SLC25A1,ACSF3	-1.45706	-0.522794	9	22
THIOESTER BIOSYNTHETIC PROCESS%GOBP%GO:0035384	THIOESTER BIOSYNTHETIC PROCESS%GOBP%GO:0035384	0.0528798	0.19599	-1	HSD17B12,ACSL3,HACD2,PDHX,ACSL4,PPT1,HACD1,SLC25A1,ACSF3	-1.45706	-0.522794	9	22
PEPTIDYL-ASPARAGINE MODIFICATION%GOBP%GO:0018196	PEPTIDYL-ASPARAGINE MODIFICATION%GOBP%GO:0018196	0.0532023	0.196999	-1	MGAT1,NUDT14,FUT8,UGGT2,ALG5,UGGT1,MGAT5	-1.45819	-0.536304	7	20
PURINE NUCLEOSIDE BISPHOSPHATE METABOLIC PROCESS%GOBP%GO:0034032	PURINE NUCLEOSIDE BISPHOSPHATE METABOLIC PROCESS%GOBP%GO:0034032	0.0533643	0.197041	-1	ACOT1,TPST1,SUCLG2,ACSF2,HSD17B12,ACSL3,SULT1A2,NUDT19,PAPSS2,TPST2,OXSM,GLYAT,HACD2,PDHX,ACSL4,PPT1,HACD1,SLC25A1,PAPSS1,ACSF3	-1.37438	-0.402592	20	60
RIBONUCLEOSIDE BISPHOSPHATE METABOLIC PROCESS%GOBP%GO:0033875	RIBONUCLEOSIDE BISPHOSPHATE METABOLIC PROCESS%GOBP%GO:0033875	0.0533643	0.197041	-1	ACOT1,TPST1,SUCLG2,ACSF2,HSD17B12,ACSL3,SULT1A2,NUDT19,PAPSS2,TPST2,OXSM,GLYAT,HACD2,PDHX,ACSL4,PPT1,HACD1,SLC25A1,PAPSS1,ACSF3	-1.37438	-0.402592	20	60
NUCLEOSIDE BISPHOSPHATE METABOLIC PROCESS%GOBP%GO:0033865	NUCLEOSIDE BISPHOSPHATE METABOLIC PROCESS%GOBP%GO:0033865	0.0533643	0.197041	-1	ACOT1,TPST1,SUCLG2,ACSF2,HSD17B12,ACSL3,SULT1A2,NUDT19,PAPSS2,TPST2,OXSM,GLYAT,HACD2,PDHX,ACSL4,PPT1,HACD1,SLC25A1,PAPSS1,ACSF3	-1.37438	-0.402592	20	60
TOLL RECEPTOR SIGNALING PATHWAY%PANTHER PATHWAY%P00054	TOLL RECEPTOR SIGNALING PATHWAY%PANTHER PATHWAY%P00054	0.0537433	0.198254	1	UBE2N,UBE2N,TRAF6,IRAK1,IRAK1,MAPK1,TOLLIP,TOLLIP,IKBKB,IKBKB,UBE2V1,UBE2V1,MAPK14,MAPK14,MAPK9,MAPK9,TANK,TANK,SIRT6,TAB1,TAB1,MAP3K7,MAP3K7,MAP2K2,MAP2K2	1.39004	0.401822	25	42
CELLULAR RESPONSE TO LIPID%GOBP%GO:0071396	CELLULAR RESPONSE TO LIPID%GOBP%GO:0071396	0.0538725	0.198544	-1	PCK2,ATP1A2,TESC,ATP1A1,BMP7,PDK3,PHB,SIRPA,LYN,SFRP1,WNT11,PTK7,SHPK,AXL,MTDH,KDM3A,UBE3A,PDCD4,HNRNPU,RHOA,ADAM9,TWF2,CTR9,ARID1A,SERPINE1,SRC,ADNP2,CACTIN,SNW1,GNAI1,PABPN1,WNT5B,CDC73,AQP1,TMF1,RBFOX2	-1.31246	-0.349465	36	110
FCERI MEDIATED MAPK ACTIVATION%REACTOME DATABASE ID RELEASE 77%2871796	FCERI MEDIATED MAPK ACTIVATION%REACTOME DATABASE ID RELEASE 77%2871796	0.0539882	0.198784	-1	NRAS,LYN,PAK1,HRAS,JUN	-1.47356	-0.578539	5	15
MITOCHONDRIAL ELECTRON TRANSPORT, NADH TO UBIQUINONE%GOBP%GO:0006120	MITOCHONDRIAL ELECTRON TRANSPORT, NADH TO UBIQUINONE%GOBP%GO:0006120	0.0540718	0.198905	-1	NDUFS1,NDUFV2,NDUFS6,NDUFA5,NDUFV3,NDUFA2,NDUFA9,NDUFA6,NDUFS5,NDUFS2,NDUFS4,NDUFC1,NDUFA7,NDUFB3,NDUFA8,NDUFC2,NDUFA3,NDUFA4,NDUFAB1,NDUFV1,NDUFB9,MT-ND5	-1.42545	-0.461779	22	35
TRANSCRIPTION ELONGATION FROM RNA POLYMERASE II PROMOTER%GOBP%GO:0006368	TRANSCRIPTION ELONGATION FROM RNA POLYMERASE II PROMOTER%GOBP%GO:0006368	0.0541929	0.199164	-1	SETD2,POLR2I,SMARCD1,CDK12,CTR9,ARID1A,SUPT16H,RTF1,CDC73,PCID2,PAF1,CDK13,LEO1,SUPT6H,ADRM1,CDK9,CTDP1,SUPT4H1	-1.43997	-0.493835	18	27
NUCLEOBASE-CONTAINING COMPOUND CATABOLIC PROCESS%GOBP%GO:0034655	NUCLEOBASE-CONTAINING COMPOUND CATABOLIC PROCESS%GOBP%GO:0034655	0.0543437	0.199531	1	PABPC4,CSDE1,SAMD4A,CTIF,NUDT16,ENTPD4,RNH1,EIF3E,AGO4,YTHDF2,NT5C2,DCTPP1,PDE4D,DDX5,LSM1,ZPR1,APEX1,NUDT5,GSPT1,NUDT11,DXO,ENPP4,TTC37,RC3H1,NUDT1,SMG9,UPF1,NUDT15,CNOT10,VCP,DIS3L2,CNOT7,ADAL,SND1,SMG6,NT5C,EXOG,EDC3,NUDT3,SETMAR,EXOSC8,PATL1,CNOT2,NUDT4,ZC3H12A,DNASE2,UPF2,ZFP36L1,UPF3B,SKIV2L,ITPA,CNOT1,SARM1	1.23743	0.283999	53	157
CELL MORPHOGENESIS INVOLVED IN DIFFERENTIATION%GOBP%GO:0000904	CELL MORPHOGENESIS INVOLVED IN DIFFERENTIATION%GOBP%GO:0000904	0.054409	0.199584	-1	LAMA2,STC1,LAMB1,POF1B,LAMC3,LAMC1,VSTM2L,LAMC2,STXBP1,EFNB3,BSG,LAMB3,LAMA3,LAMA5,LAMA1,LAMB2,EPHB2,NRP2,FN1,SEMA4B,ANK3,NRP1,S100A6,SEMA4D,LMTK2,PLXND1,SEMA3C,NCAM1,FARP1,SEMA4C,NOTCH3,NPTN,RADIL,RHOA,RAB10,ALCAM,KIF5C,RPS6KA5,RHOG,ROBO2,CIB1,RAC1,BAIAP2	-1.27327	-0.320169	43	174
REGULATION OF MUSCLE SYSTEM PROCESS%GOBP%GO:0090257	REGULATION OF MUSCLE SYSTEM PROCESS%GOBP%GO:0090257	0.0544605	0.199587	-1	DSG2,STC1,BMP10,ATP1A2,DSC2,ATP2B1,ATP1B1,SLC9A1,DSP,CTNNA3,JUP,FGF13,DLG1,PARP1,P2RX4,HAND2,NKX2-5,ENO1,CACNA1C,CAMK2B,MYBPC3,ATP2B4,KCNQ1,FKBP1B	-1.32665	-0.361074	24	95
LYSOSOME LOCALIZATION%GOBP%GO:0032418	LYSOSOME LOCALIZATION%GOBP%GO:0032418	0.0545857	0.199859	1	MAP6,TFEB,LAMTOR1,NDEL1,SPAG9,VPS33A,S100A13	1.44866	0.479064	7	23
AMINOGLYCAN METABOLIC PROCESS%GOBP%GO:0006022	AMINOGLYCAN METABOLIC PROCESS%GOBP%GO:0006022	0.0547074	0.200118	-1	CHST6,CHST14,CHSY1,CD44,ST3GAL4,HS3ST3B1,UGDH,B4GAT1,CHST12,HS3ST1,FGF2,PXYLP1,ST3GAL1,CHST11,TGFB1,EXT2,GLCE,B3GAT3,CHPF,B3GNT2,ST3GAL2,CHST7,HYAL2	-1.40206	-0.436122	23	43
NEGATIVE REGULATORS OF RIG-I MDA5 SIGNALING%REACTOME DATABASE ID RELEASE 77%936440	NEGATIVE REGULATORS OF RIG-I MDA5 SIGNALING%REACTOME DATABASE ID RELEASE 77%936440	0.0548079	0.200299	1	PIN1,TAX1BP1,ATG5,UBE2D3,UBE2D1,ITCH,TRAF3,ISG15,UBE2K,PCBP2,UBA52,ATG12	1.45612	0.494591	12	21
BIOCARTA_VDR_PATHWAY%MSIGDB_C2%BIOCARTA_VDR_PATHWAY	BIOCARTA_VDR_PATHWAY%MSIGDB_C2%BIOCARTA_VDR_PATHWAY	0.0551141	0.201113	-1	HDAC1,RXRA,SMARCD1,ARID1A,NCOA1,SUPT16H,ACTL6A,EP300,SMARCA4,SMARCC1,SMARCC2	-1.44898	-0.526133	11	21
G1 S TRANSITION%REACTOME DATABASE ID RELEASE 77%69206	G1 S TRANSITION%REACTOME DATABASE ID RELEASE 77%69206	0.0551331	0.201113	1	PPP2R3B,DHFR,PSMF1,PPP2R1A,CDK4,PSMD9,PSME3,PSMD5,PSMA5,PCNA,PSMB6,WEE1,PSMD4,CCNE1,PSMA1,LIN37,PSMA7,TYMS,PSMB3,MAX,PSMB4,POLE2,AKT3,UBA52,POLA1,TK1,CDK1,PSMA6,CDK2,PPP2CA,PSMD11,CCND1,ORC5,CCNB1	1.29349	0.317567	34	97
ESTABLISHMENT OF PROTEIN LOCALIZATION TO MITOCHONDRIAL MEMBRANE%GOBP%GO:0090151	ESTABLISHMENT OF PROTEIN LOCALIZATION TO MITOCHONDRIAL MEMBRANE%GOBP%GO:0090151	0.055274	0.201344	1	TIMM8B,TIMM13,HSP90AA1,MOAP1,TOMM22,TIMM10B,ROMO1,SAMM50,BCS1L	1.47486	0.523406	9	18
MICROTUBULE CYTOSKELETON ORGANIZATION%GOBP%GO:0000226	MICROTUBULE CYTOSKELETON ORGANIZATION%GOBP%GO:0000226	0.0553991	0.201344	1	DCLK2,MAP2,PIN1,MAP7D1,BICD2,NTMT1,HOOK2,KATNAL2,TUBB6,PCM1,STARD9,NUDC,TUBA1A,KATNB1,SPC25,CFL1,CRIPT,SBDS,NAV1,TACC2,SPIRE1,MAPRE2,OFD1,STMN1,CAMSAP1,CEP135,TUBB,DYNC1H1,PHLDB2,TUBB4B,ZPR1,WDR73,STMN2,USP33,DNAAF5,DYNLT1,MTCL1,MAP7D3,KIF14,VCP,GOLGA2,NDEL1,TBCE,CCDC88A,NEK7,DLGAP5,FER,CLIP1,DCTN1,CCDC8,TUBGCP5,CUL9,ATXN3,TBCEL,PAFAH1B1,NSFL1C,KATNAL1,GAPDH,TUBGCP3,MARK1,RMDN1,CDK5RAP2,MAPRE3,TB…	1.19559	0.26045	77	237
REGULATION OF HORMONE LEVELS%GOBP%GO:0010817	REGULATION OF HORMONE LEVELS%GOBP%GO:0010817	0.0554583	0.201344	-1	TRH,VAMP8,CPQ,RAB11FIP1,FDX1,C2CD2L,NMB,SFRP1,HSD17B11,SNAP25,ARNT,CYP2S1,LTBP4,FURIN,DHCR7,STC2,FGG,CTSZ,HSD17B7,SCPEP1,RDH11,PCSK6,PCSK5,VAMP7,SNAP23,STX4,AGT,ACSL4,H6PD	-1.3227	-0.359478	29	96
PID_REELIN_PATHWAY%MSIGDB_C2%PID_REELIN_PATHWAY	PID_REELIN_PATHWAY%MSIGDB_C2%PID_REELIN_PATHWAY	0.0554882	0.201344	1	PIK3R1,RELN,PIK3CA,RAPGEF1,NCK2,LRP8,GSK3B,ARHGEF2,PAFAH1B1,FYN,CDK5	1.45555	0.508202	11	19
CELLULAR COMPONENT DISASSEMBLY%GOBP%GO:0022411	CELLULAR COMPONENT DISASSEMBLY%GOBP%GO:0022411	0.0554913	0.201344	1	MAP1LC3B,DSTN,CFL2,HSPA8,MTRF1L,KATNB1,CFL1,UFC1,RB1CC1,CHMP7,CHMP3,ATG5,WDR1,NAPB,SQSTM1,STMN1,APEH,TECPR1,RPL23,GSPT1,KLC1,STMN2,WIPI1,PRKCA,WDR45,MICAL2,MTIF3,ABCE1,GRWD1,GAK,ETF1,VPS4A,KIF14,VCP,ATG14,ATG7,GSPT2,GSK3B,GOLGA2,ATG9A,MRRF,CHMP1B,EXOG,GABARAPL2,MCTS1,DCTN1,USP30,NAPA,VPS33A,TSG101,UFM1,ATG12,DNASE2,DENR,ATP2A2	1.23352	0.282853	55	158
INTERFERON GAMMA SIGNALING%REACTOME DATABASE ID RELEASE 77%877300	INTERFERON GAMMA SIGNALING%REACTOME DATABASE ID RELEASE 77%877300	0.0555097	0.201344	-1	ICAM1,SP100,CD44,TRIM25,NCAM1,GBP1,CAMK2B,HLA-C,PRKCD,HLA-A,PML,IRF6,JAK1	-1.4199	-0.47436	13	31
BILE ACID METABOLIC PROCESS%GOBP%GO:0008206	BILE ACID METABOLIC PROCESS%GOBP%GO:0008206	0.0555556	0.201344	1	ACAA1,OSBPL6,ACOT8,OSBPL2,OSBPL9,OSBPL1A,HSD17B10,OSBP,ABCD3,OSBPL3,GBA2	1.47049	0.539444	11	16
POTASSIUM ION TRANSPORT%GOBP%GO:0006813	POTASSIUM ION TRANSPORT%GOBP%GO:0006813	0.0556941	0.20154	-1	ATP1A2,ATP1B1,ATP1A1,SLC9A1,ATP1B2,ATP1B3,KCNJ8,KCNQ1	-1.43863	-0.497366	8	26
MAPK FAMILY SIGNALING CASCADES%REACTOME DATABASE ID RELEASE 77%5683057	MAPK FAMILY SIGNALING CASCADES%REACTOME DATABASE ID RELEASE 77%5683057	0.0557707	0.20154	1	FGF1,BRAF,PIK3R1,CDC42EP3,PIK3CA,TLN1,PSME4,FNTB,AGO4,CAMK2D,RASAL2,PTPN11,PEBP1,ARRB1,PSMF1,CSK,PPP2R5E,HSPB1,PPP2R1A,VCL,ARAF,PPP2R5A,PEA15,YWHAB,RAF1,LAMTOR3,PSMD9,PSME3,BCL2L1,MAPK1,PSMD5,FOXO1,AGO2,PSMA5,SHC1,FNTA,ACTN2,PSMB6,PPP5C,CAMK2G,NRG1,PSMD4,NEFL,SOS1,PSMA1,CUL3,PSMA7,PSMB3,PSMB4,FYN,RASA1,PDE6D,UBA52	1.23635	0.280635	53	167
REGULATION OF PRODUCTION OF MOLECULAR MEDIATOR OF IMMUNE RESPONSE%GOBP%GO:0002700	REGULATION OF PRODUCTION OF MOLECULAR MEDIATOR OF IMMUNE RESPONSE%GOBP%GO:0002700	0.0558065	0.20154	-1	EPHB2,APOA1,CD55,PHB,BST2,DDX58,TP53BP1,MAD2L2,HLA-A,THOC1,STX4,TFRC,B2M,SIRT1,TGFB1	-1.41641	-0.451897	15	38
PID_PI3KCI_AKT_PATHWAY%MSIGDB_C2%PID_PI3KCI_AKT_PATHWAY	PID_PI3KCI_AKT_PATHWAY%MSIGDB_C2%PID_PI3KCI_AKT_PATHWAY	0.0558151	0.20154	1	TBC1D4,CASP9,RAF1,BCL2L1,FOXO1,BAD,GSK3B,MTOR,RICTOR,AKT3,FOXO3	1.44592	0.478156	11	23
EPITHELIAL TO MESENCHYMAL TRANSITION%GOBP%GO:0001837	EPITHELIAL TO MESENCHYMAL TRANSITION%GOBP%GO:0001837	0.056038	0.202159	-1	LOXL3,ENG,BMP7,LOXL2,HEY2,TCOF1,SPRY1,NOLC1,CTNNB1,PDCD4,NOG,RBPJ,TGFBR1	-1.41799	-0.459363	13	35
REGULATION OF PLK1 ACTIVITY AT G2 M TRANSITION%REACTOME DATABASE ID RELEASE 77%2565942	REGULATION OF PLK1 ACTIVITY AT G2 M TRANSITION%REACTOME DATABASE ID RELEASE 77%2565942	0.0562249	0.202294	1	PCM1,TUBA1A,SSNA1,OFD1,CEP135,TUBB,PPP2R1A,DYNC1H1,TUBB4B,HSP90AA1,CEP131,ACTR1A,PAFAH1B1,UBA52,CDK5RAP2,AJUBA,YWHAE,PRKACA,CSNK1E,CDK1,DYNC1I2,NDE1,CLASP1,PCNT,CCNB1,DCTN3,MAPRE1,CEP290,PRKAR2B,CNTRL,HAUS5,DCTN2,CEP41,HAUS8	1.33611	0.353774	34	64
LIMB DEVELOPMENT%GOBP%GO:0060173	LIMB DEVELOPMENT%GOBP%GO:0060173	0.0562479	0.202294	-1	ITGA6,MYH3,HDAC1,CACNA1C,CTNNB1,PCSK5,NOG	-1.44827	-0.519641	7	22
APPENDAGE DEVELOPMENT%GOBP%GO:0048736	APPENDAGE DEVELOPMENT%GOBP%GO:0048736	0.0562479	0.202294	-1	ITGA6,MYH3,HDAC1,CACNA1C,CTNNB1,PCSK5,NOG	-1.44827	-0.519641	7	22
REGULATION OF DENDRITE MORPHOGENESIS%GOBP%GO:0048814	REGULATION OF DENDRITE MORPHOGENESIS%GOBP%GO:0048814	0.0562814	0.202294	1	DBN1,HECW2,RELN,TNIK,CAPRIN1,DBNL,LRP8,GSK3B	1.42031	0.448435	8	28
AXONOGENESIS%GOBP%GO:0007409	AXONOGENESIS%GOBP%GO:0007409	0.056531	0.203005	-1	LAMA2,VSTM2L,LAMC2,STXBP1,EFNB3,BSG,LAMA3,LAMA5,LAMA1,EPHB2,NRP2,SEMA4B,ANK3,NRP1,S100A6,SEMA4D,LMTK2,PLXND1,SEMA3C,NCAM1,SEMA4C,NOTCH3,NPTN,RAB10,ALCAM,KIF5C,RPS6KA5,RHOG,ROBO2,RAC1,BAIAP2	-1.3067	-0.34694	31	113
ACTIN POLYMERIZATION OR DEPOLYMERIZATION%GOBP%GO:0008154	ACTIN POLYMERIZATION OR DEPOLYMERIZATION%GOBP%GO:0008154	0.0567574	0.203632	1	DSTN,CFL2,GAS7,CFL1,SPIRE1,WDR1,FLII,EVL,MICAL2,WASL	1.40333	0.430389	10	32
SUPRAMOLECULAR FIBER ORGANIZATION%GOBP%GO:0097435	SUPRAMOLECULAR FIBER ORGANIZATION%GOBP%GO:0097435	0.0570323	0.204431	-1	MYH6,COL2A1,POF1B,BMP10,ADD2,COL11A2,LUM,BAIAP2L1,COL14A1,COL1A2,LOXL3,NEBL,DSP,IQGAP2,ADD1,FGF13,ADAMTS3,COL5A1,LOXL2,TMOD1,MYO1C,CAPG,TCAP,MYH3,DLG1,PXDN,COL1A1,NUMA1,ATP7A,MYO1D,CD2AP,MARCKSL1,HOOK1,LTBP2,EMILIN1,LIMA1,BMP1,MYO1B,MARCKS,TMOD3,BIN3,MYO6,MAD2L2,CSRP1,FAT1,FURIN,CGNL1,TTN,PLOD3,ADAMTS14,MYOM2,RHOA,DIAPH3,DES,TRIM27,RHOG,TWF2,HSP90B1,CIB1,RAC1,BAIAP2,TCHH,CD36,SRC,LOXL4,CHP1,CORO7…	-1.22869	-0.295424	70	275
NEGATIVE REGULATION OF CATALYTIC ACTIVITY%GOBP%GO:0043086	NEGATIVE REGULATION OF CATALYTIC ACTIVITY%GOBP%GO:0043086	0.0571972	0.204835	-1	THY1,RECK,SERPINB1,SERPINB9,AKAP5,F11R,IFI16,BMP7,GNAQ,PLAUR,EPHB2,TRIAP1,LRP1,GNAI3,SPRY3,CD44,ADAR,SPRY1,MVP,LYN,PAM16,ANGPTL4,GNAI2,CRY2,HRAS,SEMA4D,VTN,RRP1B,GPRC5A,MAD2L2,FABP1,SERPINE2,SERPINA1,PRKCD,BOD1L1,THBS1,PIP4K2A,ECM1,PPP1R1B,TARBP2,ATP2B4,KDM5A,PDCD4,FKBP1B,HNRNPU,PIP4K2C,GCHFR,TIMP3,AIDA,GLA,TRIM27,RDX,PIP4K2B,SERPINE1,GAS6,SRC,CHP1,CAV1,CDKN1B,AGT,ITGB1BP1,PALM,PKIA,INPP5K	-1.23703	-0.300798	64	239
TRANSCRIPTIONAL REGULATION BY SMALL RNAS%REACTOME DATABASE ID RELEASE 77%5578749	TRANSCRIPTIONAL REGULATION BY SMALL RNAS%REACTOME DATABASE ID RELEASE 77%5578749	0.0572568	0.204861	-1	NUP85,AAAS,TPR,NUP35,NUP62,NUP153,NUP54,POLR2I,POLR2D,NUP50,NUP155,RANBP2,RAE1,NUP88,NUP160,NUP210,NUP107,NDC1,AGO1,NUP214,NUP133,POLR2G	-1.4081	-0.443656	22	40
LIPID LOCALIZATION%GOBP%GO:0010876	LIPID LOCALIZATION%GOBP%GO:0010876	0.0575241	0.20563	-1	XKR8,SLC27A3,CLU,ANO6,TRIAP1,SLC2A1,APOA1,ACSL3,ATP11A,LIPG,STRA6,ABCA8,TMEM30A,LIMA1,OSBPL8,STOML2	-1.32931	-0.368255	16	85
POSITIVE REGULATION OF PEPTIDYL-TYROSINE PHOSPHORYLATION%GOBP%GO:0050731	POSITIVE REGULATION OF PEPTIDYL-TYROSINE PHOSPHORYLATION%GOBP%GO:0050731	0.0579687	0.207031	-1	ADAM17,CSPG4,CD44,LYN,NRP1,SEMA4D,VTN,PDGFB,ERBB3,IGF2,GAS6,SRC,AGT,SRCIN1,TP53,ITGA5,TGFB1,UNC119	-1.39588	-0.436608	18	42
PID_RAC1_PATHWAY%MSIGDB_C2%PID_RAC1_PATHWAY	PID_RAC1_PATHWAY%MSIGDB_C2%PID_RAC1_PATHWAY	0.058153	0.207365	-1	ATF2,CTNNA1,PIP5K1A,PIP5K1C,PAK1,JUN,CTNNB1,RAC1,BAIAP2	-1.41195	-0.471701	9	31
POSITIVE REGULATION OF ERBB SIGNALING PATHWAY%GOBP%GO:1901186	POSITIVE REGULATION OF ERBB SIGNALING PATHWAY%GOBP%GO:1901186	0.0581679	0.207365	-1	PLAUR,ADAM17,NUP62,RBPJ,AGT,AFAP1L2,NEU3	-1.46425	-0.574883	7	15
REGULATION OF MACROAUTOPHAGY%GOBP%GO:0016241	REGULATION OF MACROAUTOPHAGY%GOBP%GO:0016241	0.0589162	0.209842	1	MTMR8,LRSAM1,VPS35,PIK3CA,RAB3GAP1,ATP13A2,CAPNS1,RAB3GAP2,VPS26B,TSC2,PAFAH1B2,VDAC1,GBA,SNX5,LARP1,CASP3,FEZ2,CLEC16A,CAPN1,MTOR,VPS13D,FYCO1,UCHL1,SLC25A5,SNX6,GAPDH,GPSM1,SEC22B,CHMP4B,SLC25A4,CDK5,UVRAG,PRKACA,SH3GLB1,SPTLC2	1.28191	0.3172	35	93
POSITIVE REGULATION OF ENDOTHELIAL CELL PROLIFERATION%GOBP%GO:0001938	POSITIVE REGULATION OF ENDOTHELIAL CELL PROLIFERATION%GOBP%GO:0001938	0.0590323	0.210065	-1	NRAS,EGFL7,ADAM17,NRP2,MYDGF,SP1,NRP1,PDGFB,ARNT,ECM1,IGF2,FGF2,TGFBR1	-1.4014	-0.447106	13	38
RESPONSE TO STARVATION%GOBP%GO:0042594	RESPONSE TO STARVATION%GOBP%GO:0042594	0.0593246	0.210795	1	MAP1LC3B,HSPA8,MTMR3,TFEB,RRAGC,NUAK1,ATG5,EIF2S1,ZFYVE1,LARP1,WIPI1,USP33,MAPK1,WDR45,FOXO1,RPTOR,PICK1,EIF2AK3,CLEC16A,ATG14,BMPR2,ATG7,CPEB4,MTOR,PIK3R4,DAP,XPR1,FAS,GABARAPL2,PRKD1,ZC3H12A,FOXO3,WDR24,TBC1D5,STK24	1.31353	0.332897	35	81
HALLMARK_TNFA_SIGNALING_VIA_NFKB%MSIGDB_C2%HALLMARK_TNFA_SIGNALING_VIA_NFKB	HALLMARK_TNFA_SIGNALING_VIA_NFKB%MSIGDB_C2%HALLMARK_TNFA_SIGNALING_VIA_NFKB	0.0593448	0.210795	-1	ATP2B1,LAMB3,SLC2A3,PLAUR,CD44,B4GALT1,TNC,CYR61,JUN,MARCKS,DDX58	-1.37953	-0.423477	11	46
NEGATIVE REGULATION OF EPITHELIAL CELL MIGRATION%GOBP%GO:0010633	NEGATIVE REGULATION OF EPITHELIAL CELL MIGRATION%GOBP%GO:0010633	0.0595863	0.211461	-1	STC1,BMP10,JUP,SP100,DCN,ADAMTS9,MECP2,THBS1,KRIT1,ATP2B4,RHOA,FGF2	-1.4062	-0.454426	12	36
POSITIVE REGULATION OF FIBROBLAST PROLIFERATION%GOBP%GO:0048146	POSITIVE REGULATION OF FIBROBLAST PROLIFERATION%GOBP%GO:0048146	0.0599309	0.212412	-1	FN1,S100A6,PDGFB,PDGFC,CDK6,GAS6,AGT,BMI1,AQP1,NDUFS4,WNT5A	-1.45783	-0.563355	11	16
PID_MYC_REPRESS_PATHWAY%MSIGDB_C2%PID_MYC_REPRESS_PATHWAY	PID_MYC_REPRESS_PATHWAY%MSIGDB_C2%PID_MYC_REPRESS_PATHWAY	0.0600363	0.212412	-1	COL1A2,CLU,ITGA6,SFXN3,SFRP1,SP1,HDAC1,NFYA	-1.41969	-0.479544	8	29
LIPID OXIDATION%GOBP%GO:0034440	LIPID OXIDATION%GOBP%GO:0034440	0.0600707	0.212412	1	ACAA1,ACADVL,ACOX3,ADH5,ACOT8,ECHS1,ACOX1,HSD17B10,ETFDH,ABCD3,IVD,ALOX12,ECHDC1,DECR1,HACL1,HSD17B4	1.3622	0.382426	16	48
FATTY ACID OXIDATION%GOBP%GO:0019395	FATTY ACID OXIDATION%GOBP%GO:0019395	0.0600707	0.212412	1	ACAA1,ACADVL,ACOX3,ADH5,ACOT8,ECHS1,ACOX1,HSD17B10,ETFDH,ABCD3,IVD,ALOX12,ECHDC1,DECR1,HACL1,HSD17B4	1.3622	0.382426	16	48
ANTERIOR/POSTERIOR PATTERN SPECIFICATION%GOBP%GO:0009952	ANTERIOR/POSTERIOR PATTERN SPECIFICATION%GOBP%GO:0009952	0.0613351	0.216339	-1	HEY2,KDM2B,PBX3,CFC1,HOXB4,PCSK5,NOG,TGFBR1,CER1,TDGF1P3,CELSR2,BASP1	-1.43783	-0.528818	12	20
UROGENITAL SYSTEM DEVELOPMENT%GOBP%GO:0001655	UROGENITAL SYSTEM DEVELOPMENT%GOBP%GO:0001655	0.0613431	0.216339	-1	COL4A1,BMP7,EPHB2,CRIP1,WFS1,PODXL,NUP85,NPNT,IQGAP1,STRA6,WNT11,PDGFB,TRAF3IP1,MAGI2,GPC3,PCSK5,ROBO2,FGF2,TGFBR1,AGT	-1.34916	-0.389611	20	65
METABOLISM OF FAT-SOLUBLE VITAMINS%REACTOME DATABASE ID RELEASE 77%6806667	METABOLISM OF FAT-SOLUBLE VITAMINS%REACTOME DATABASE ID RELEASE 77%6806667	0.0613466	0.216339	-1	HSPG2,GPC1,AGRN,LRP1,APOA1,SDC3,GPC3,RDH11,GPC4,GPC2,SDC4	-1.42281	-0.491898	11	26
PDGF SIGNALING PATHWAY%PANTHER PATHWAY%P00047	PDGF SIGNALING PATHWAY%PANTHER PATHWAY%P00047	0.0615504	0.2165	1	OPHN1,OPHN1,STAT4,STAT4,STAT4,BRAF,BRAF,BRAF,PIK3R1,PIK3R1,PIK3CA,PIK3CA,DLC1,DLC1,ARHGAP1,ARHGAP1,MAPKAPK2,MAPKAPK2,ERF,ERF,SRGAP1,SRGAP1,ARAF,ARAF,NCK2,NCK2,RAF1,RAF1,PRKCA,PRKCA,MAPK1,MAPK1,MAPK1,ARHGAP10,ARHGAP10,SHC1,SHC1,RPS6KA3,RPS6KA3,IKBKB,IKBKB,GSK3B,GSK3B	1.22148	0.278279	43	165
AUTOPHAGY OF MITOCHONDRION%GOBP%GO:0000422	AUTOPHAGY OF MITOCHONDRION%GOBP%GO:0000422	0.0615578	0.2165	1	MAP1LC3B,RB1CC1,ATG5,SQSTM1,WIPI1,WDR45,ATG14,ATG7,ATG9A,GABARAPL2,USP30,ATG12,FIS1,ATG3	1.40488	0.443562	14	28
MITOCHONDRION DISASSEMBLY%GOBP%GO:0061726	MITOCHONDRION DISASSEMBLY%GOBP%GO:0061726	0.0615578	0.2165	1	MAP1LC3B,RB1CC1,ATG5,SQSTM1,WIPI1,WDR45,ATG14,ATG7,ATG9A,GABARAPL2,USP30,ATG12,FIS1,ATG3	1.40488	0.443562	14	28
BIOCARTA_INTEGRIN_PATHWAY%MSIGDB_C2%BIOCARTA_INTEGRIN_PATHWAY	BIOCARTA_INTEGRIN_PATHWAY%MSIGDB_C2%BIOCARTA_INTEGRIN_PATHWAY	0.0616302	0.216561	1	ZYX,TLN1,RAPGEF1,CAPNS1,CSK,RAF1,MAPK1,SHC1,SOS1,TNS1,FYN,ACTA1	1.41368	0.458662	12	25
MRNA 3'-END PROCESSING%GOBP%GO:0031124	MRNA 3'-END PROCESSING%GOBP%GO:0031124	0.0618844	0.21726	-1	AHCYL1,RPRD1B,CPSF2,FIP1L1,POLR2D,PNPT1,SCAF8,CPSF4,SLBP,CDC73,CSTF3,NCBP1,PAF1,RPRD2,NCBP2,RPRD1A,CPSF3,MTPAP,CSTF2T,LEO1	-1.40271	-0.453296	20	36
REGULATION OF SYNAPSE ORGANIZATION%GOBP%GO:0050807	REGULATION OF SYNAPSE ORGANIZATION%GOBP%GO:0050807	0.0620376	0.217603	1	DBN1,SLITRK4,SIPA1L1,RELN,VPS35,PTEN,CFL1,CRIPT,EIF4G1,HOMER1,CAPRIN1,SNCA,DBNL,LRP8,GPC6	1.33231	0.355446	15	61
P53 PATHWAY%PATHWAY INTERACTION DATABASE NCI-NATURE CURATED DATA%P53 PATHWAY	P53 PATHWAY%PATHWAY INTERACTION DATABASE NCI-NATURE CURATED DATA%P53 PATHWAY	0.0621971	0.217893	1	DYRK2,SETD7,PIN1,SMYD2,RCHY1,UBE2D1,RPL23,RPL11,PRMT5,GSK3B,E4F1,MAPK14,HUWE1,CREBBP,NEDD8,CSNK1E,MAPK9,CDK2,PPP2CA,HIPK2,TTC5,CSNK1G1	1.37083	0.394122	22	43
O-GLYCAN PROCESSING%GOBP%GO:0016266	O-GLYCAN PROCESSING%GOBP%GO:0016266	0.0622314	0.217893	-1	ST3GAL4,GXYLT1,GXYLT2,POFUT1,ST3GAL1,B3GNT2,ST3GAL2,GALNT2,C1GALT1	-1.44194	-0.550102	9	17
DNA INTEGRITY CHECKPOINT SIGNALING%GOBP%GO:0031570	DNA INTEGRITY CHECKPOINT SIGNALING%GOBP%GO:0031570	0.0624703	0.218535	-1	TAOK3,ATF2,CHEK2,TRIAP1,MDC1,WAC,TP53BP1,PML,CDKN1B,CDC5L,ERCC6,PRPF19,RPA2,TP53,PLK1	-1.37533	-0.418622	15	48
HALLMARK_PI3K_AKT_MTOR_SIGNALING%MSIGDB_C2%HALLMARK_PI3K_AKT_MTOR_SIGNALING	HALLMARK_PI3K_AKT_MTOR_SIGNALING%MSIGDB_C2%HALLMARK_PI3K_AKT_MTOR_SIGNALING	0.0628272	0.219588	1	PIN1,DUSP3,PTEN,TSC2,UBE2D3,PTPN11,SQSTM1,PFN1,CDK4,SMAD2,RAF1,MAPK1,EIF4E,AKT1S1,RPS6KA3,CAB39,GSK3B	1.33365	0.361479	17	56
NEGATIVE REGULATION OF CELLULAR AMIDE METABOLIC PROCESS%GOBP%GO:0034249	NEGATIVE REGULATION OF CELLULAR AMIDE METABOLIC PROCESS%GOBP%GO:0034249	0.0629418	0.219792	1	PIN1,SAMD4A,DAPK3,YTHDF3,DHFR,EIF3E,AGO4,YTHDF2,DAPK1,FXR2,CPEB2,LSM1,EIF2S1,MALSU1,LARP1,YBX1,AGO2,RC3H1,CAPRIN1,NANOS1,EIF2AK3,UPF1,CNOT10,DIS3L2,CNOT7,CPEB4,EIF6,RBM24,EXOSC8,TYMS,PATL1,CNOT2,GIGYF2,GAPDH,ZC3H12A,ZFP36L1,RPS3,TNRC6A,CNOT1	1.25155	0.298906	39	116
STRIATED MUSCLE CONTRACTION%GOBP%GO:0006941	STRIATED MUSCLE CONTRACTION%GOBP%GO:0006941	0.0630517	0.219853	-1	MYH6,ATP1A2,CACNB2,ATP1B1,ATP1A1,MYH8,TCAP,MYH3,DTNA,CACNA1C,MYBPC3,TTN,KCNJ8,KCNQ1	-1.35811	-0.409911	14	51
ALPHA-AMINO ACID METABOLIC PROCESS%GOBP%GO:1901605	ALPHA-AMINO ACID METABOLIC PROCESS%GOBP%GO:1901605	0.0630712	0.219853	-1	ARG2,PLOD2,CPS1,GLDC,SARDH,MAT1A,AMT,ATP7A,THAP4,GLS,ALDH18A1,TST,SHMT2,OAT,AASS	-1.33243	-0.374816	15	77
REGULATION OF TRANS-SYNAPTIC SIGNALING%GOBP%GO:0099177	REGULATION OF TRANS-SYNAPTIC SIGNALING%GOBP%GO:0099177	0.0631514	0.219937	1	OPHN1,NPTXR,DBN1,SIPA1L1,NCDN,RELN,RAB3GAP1,TPRG1L,PTEN,SQSTM1,HOMER1,LGMN,GIPC1,FABP5,DLGAP4,GRID1,PNKD,ERC2,PICK1,LRP8,PPP3CB	1.30321	0.32826	21	83
CELL-SUBSTRATE JUNCTION ORGANIZATION%GOBP%GO:0150115	CELL-SUBSTRATE JUNCTION ORGANIZATION%GOBP%GO:0150115	0.063321	0.220279	-1	THY1,LAMC1,ITGA6,PLEC,FN1,PIP5K1A,RAB8B	-1.41758	-0.500028	7	24
MITOTIC DNA DAMAGE CHECKPOINT SIGNALING%GOBP%GO:0044773	MITOTIC DNA DAMAGE CHECKPOINT SIGNALING%GOBP%GO:0044773	0.0633618	0.220279	-1	TAOK3,ATF2,CHEK2,TRIAP1,MDC1,WAC,PML,CDKN1B,RPA2,TP53,PLK1,SDE2,NBN,CDK5RAP3	-1.39966	-0.452313	14	36
POST-TRANSLATIONAL PROTEIN MODIFICATION%GOBP%GO:0043687	POST-TRANSLATIONAL PROTEIN MODIFICATION%GOBP%GO:0043687	0.0636163	0.220968	1	LCMT1,ATG5,ATG7,RNF7,FN3K,UBA3,SENP8,COPS5,TTL,UCHL3,ATG12	1.43001	0.485723	11	21
ERAD PATHWAY%GOBP%GO:0036503	ERAD PATHWAY%GOBP%GO:0036503	0.0637907	0.221188	-1	ERLIN2,ERLIN1,RCN3,WFS1,TRIM25,TMUB1,FBXO17,ANKZF1,SEC61B,FBXO2,HSP90B1,UGGT2,NCCRP1,RNF5,UGGT1,ERLEC1,UBXN4,CANX,AMFR,CCDC47,STT3B,CALR,TMEM129,DNAJB9,FAF2,EDEM3,OS9,TMUB2,CLGN,RNF139,HM13	-1.34437	-0.388227	31	65
NEURON DEVELOPMENT%GOBP%GO:0048666	NEURON DEVELOPMENT%GOBP%GO:0048666	0.0637922	0.221188	-1	LAMA2,LAMB1,THY1,TAOK3,VSTM2L,EPB41L3,LAMC2,STXBP1,EFNB3,BSG,FOLR1,LAMA3,LAMA5,SLC4A7,BMP7,LAMA1,EPHB2,STX3,AGRN,RAB13,NRP2,FARP2,SEMA4B,ANK3,ATP7A,LYN,IQGAP1,THOC2,PBX3,NRP1,PAK1,S100A6,SEMA4D,LMTK2,PLXND1,UGDH,SEMA3C,NCAM1,FARP1,SEMA4C,VAPA,CTNNB1,NOTCH3,NPTN,PBX2,PQBP1,FLRT3,RAB10,ALCAM,ZNF335,KIF5C,RPS6KA5,RHOG,ROBO2,RAC1,BAIAP2	-1.22486	-0.296775	56	250
PREFOLDIN MEDIATED TRANSFER OF SUBSTRATE TO CCT TRIC%REACTOME%R-HSA-389957.2	PREFOLDIN MEDIATED TRANSFER OF SUBSTRATE TO CCT TRIC%REACTOME%R-HSA-389957.2	0.0639764	0.22163	1	TUBB6,TUBA1A,TUBB4B,VBP1,PFDN2,PFDN1,PFDN6,CCT7,CCT4,CCT3,TUBB2A,CCT8,PFDN4,CCT2	1.41482	0.463547	14	24
HCMV EARLY EVENTS%REACTOME DATABASE ID RELEASE 77%9609690	HCMV EARLY EVENTS%REACTOME DATABASE ID RELEASE 77%9609690	0.0641551	0.222054	-1	NUP85,AAAS,TPR,NUP35,NUP62,PML,CBX1,NUP153,NUP54,NUP50,NUP155,RANBP2,SUZ12,RAE1,DYNLL1,NUP88,NUP160,CREB1,NUP210,NUP107,NDC1,DAXX,RBBP4,NUP214,NUP133	-1.35594	-0.409254	25	51
REGULATION OF ANATOMICAL STRUCTURE MORPHOGENESIS%GOBP%GO:0022603	REGULATION OF ANATOMICAL STRUCTURE MORPHOGENESIS%GOBP%GO:0022603	0.0642279	0.22211	-1	THY1,HTATIP2,FZD6,METRN,HSPG2,EPB41L3,ATF2,F11R,HK2,EFNB3,EPB41,JUP,FGF13,SP100,SLC9A3R1,APOA1,SYNE3,TJP1,SPRY3,DCN,CD44,DLG1,MYDGF,CDC42EP1,SEMA4B,BMPER,MOV10,SFRP1,SP1,GTF2I,NRP1,WNT11,PAK1,ANGPTL4,CDC42EP4,EMILIN1,SEMA4D,PLXND1,ADAMTS9,SEMA3C,ZMYM4,EPN1,BRWD3,MECP2,ADAMTS1,GBP1,CAMK2B,BNIP3,SEMA4C,MAGI2,CTNNB1,MTDH,PAK4,PML,THBS1,ECM1,FGG,KRIT1,ATP2B4,RALBP1,RHOA,JAK1,S100A10,COL4A2,RDX,RHOG,T…	-1.20649	-0.284695	86	348
SIGNALING EVENTS MEDIATED BY FOCAL ADHESION KINASE%PATHWAY INTERACTION DATABASE NCI-NATURE CURATED DATA%SIGNALING EVENTS MEDIATED BY FOCAL ADHESION KINASE	SIGNALING EVENTS MEDIATED BY FOCAL ADHESION KINASE%PATHWAY INTERACTION DATABASE NCI-NATURE CURATED DATA%SIGNALING EVENTS MEDIATED BY FOCAL ADHESION KINASE	0.0647895	0.223149	1	BRAF,PIK3R1,PIK3CA,TLN1,RAPGEF1,BCAR1,VCL,CAPN2,NCK2,PTPN21,RAF1,ARHGAP35,MAPK1,WASL,ITGB5,SOS1,MAPK8IP3,GIT2,FYN,RASA1,ARHGEF11	1.34295	0.371415	21	51
REGULATION OF TUMOR NECROSIS FACTOR PRODUCTION%GOBP%GO:0032680	REGULATION OF TUMOR NECROSIS FACTOR PRODUCTION%GOBP%GO:0032680	0.0648391	0.223149	-1	CLU,ARG2,EPHB2,SIRPA,DDX58,THBS1,FRMD8,TRIM27,GAS6,CACTIN	-1.39391	-0.450454	10	36
REGULATION OF RAS FAMILY ACTIVATION%PATHWAY INTERACTION DATABASE NCI-NATURE CURATED DATA%REGULATION OF RAS FAMILY ACTIVATION	REGULATION OF RAS FAMILY ACTIVATION%PATHWAY INTERACTION DATABASE NCI-NATURE CURATED DATA%REGULATION OF RAS FAMILY ACTIVATION	0.0648575	0.223149	-1	NRAS,KRAS,LGALS1,RASA2,HRAS,CAMK2B	-1.43161	-0.539335	6	18
REELIN SIGNALING PATHWAY%PATHWAY INTERACTION DATABASE NCI-NATURE CURATED DATA%REELIN SIGNALING PATHWAY	REELIN SIGNALING PATHWAY%PATHWAY INTERACTION DATABASE NCI-NATURE CURATED DATA%REELIN SIGNALING PATHWAY	0.0649127	0.223149	1	PIK3R1,RELN,PIK3CA,RAPGEF1,NCK2,LRP8,GSK3B,ARHGEF2,PAFAH1B1,FYN,CDK5	1.41939	0.469384	11	23
NUCLEOSIDE BISPHOSPHATE BIOSYNTHETIC PROCESS%GOBP%GO:0033866	NUCLEOSIDE BISPHOSPHATE BIOSYNTHETIC PROCESS%GOBP%GO:0033866	0.0649265	0.223149	-1	HSD17B12,ACSL3,PAPSS2,HACD2,PDHX,ACSL4,PPT1,HACD1,SLC25A1,PAPSS1,ACSF3	-1.39675	-0.466625	11	31
PURINE NUCLEOSIDE BISPHOSPHATE BIOSYNTHETIC PROCESS%GOBP%GO:0034033	PURINE NUCLEOSIDE BISPHOSPHATE BIOSYNTHETIC PROCESS%GOBP%GO:0034033	0.0649265	0.223149	-1	HSD17B12,ACSL3,PAPSS2,HACD2,PDHX,ACSL4,PPT1,HACD1,SLC25A1,PAPSS1,ACSF3	-1.39675	-0.466625	11	31
RIBONUCLEOSIDE BISPHOSPHATE BIOSYNTHETIC PROCESS%GOBP%GO:0034030	RIBONUCLEOSIDE BISPHOSPHATE BIOSYNTHETIC PROCESS%GOBP%GO:0034030	0.0649265	0.223149	-1	HSD17B12,ACSL3,PAPSS2,HACD2,PDHX,ACSL4,PPT1,HACD1,SLC25A1,PAPSS1,ACSF3	-1.39675	-0.466625	11	31
ANCHORING OF THE BASAL BODY TO THE PLASMA MEMBRANE%REACTOME DATABASE ID RELEASE 77%5620912	ANCHORING OF THE BASAL BODY TO THE PLASMA MEMBRANE%REACTOME DATABASE ID RELEASE 77%5620912	0.0650269	0.223299	1	PCM1,TUBA1A,SSNA1,OFD1,CEP135,TUBB,PPP2R1A,DYNC1H1,TUBB4B,HSP90AA1,CEP131,ACTR1A,PAFAH1B1,RAB3IP,CDK5RAP2,YWHAE,PRKACA,CSNK1E,CDK1,DYNC1I2,NDE1,CLASP1,PCNT,DCTN3,MAPRE1,CEP290,PRKAR2B,CNTRL,HAUS5,DCTN2,CEP41,HAUS8	1.32096	0.353571	32	60
FORMATION OF RNA POL II ELONGATION COMPLEX%REACTOME%R-HSA-112382.2	FORMATION OF RNA POL II ELONGATION COMPLEX%REACTOME%R-HSA-112382.2	0.0651589	0.223361	-1	ERCC2,POLR2I,SSRP1,POLR2D,CTR9,ELL,NELFB,SUPT16H,MLLT3,RTF1,CDC73,AFF4,CCNK,NELFCD,NELFA,NCBP1,PAF1,NCBP2,NELFE,CCNT1,LEO1,SUPT6H,CCNT2,POLR2G,CDK9,POLR2A	-1.36752	-0.416247	26	48
RNA POLYMERASE II TRANSCRIPTION ELONGATION%REACTOME DATABASE ID RELEASE 77%75955	RNA POLYMERASE II TRANSCRIPTION ELONGATION%REACTOME DATABASE ID RELEASE 77%75955	0.0651589	0.223361	-1	ERCC2,POLR2I,SSRP1,POLR2D,CTR9,ELL,NELFB,SUPT16H,MLLT3,RTF1,CDC73,AFF4,CCNK,NELFCD,NELFA,NCBP1,PAF1,NCBP2,NELFE,CCNT1,LEO1,SUPT6H,CCNT2,POLR2G,CDK9,POLR2A	-1.36752	-0.416247	26	48
ORGANELLE BIOGENESIS AND MAINTENANCE%REACTOME DATABASE ID RELEASE 77%1852241	ORGANELLE BIOGENESIS AND MAINTENANCE%REACTOME DATABASE ID RELEASE 77%1852241	0.0655293	0.224435	1	APOOL,TNPO1,GLUD2,PCM1,TUBA1A,ACSS2,ARL3,SSNA1,OFD1,CEP135,TUBB,PPP2R1A,DYNC1H1,TUBB4B,HSP90AA1,LZTFL1,TTC21B,IDH2,CEP131,IFT81,ACTR1A,TMEM11,POLRMT,IFT57,PAFAH1B1,SSBP1,HSPA9,RAB3IP,IFT22,PDE6D,CDK5RAP2,YWHAE,MAPK14,UNC119B,CREBBP,CCT4,APOO,CHCHD3,IFT140,CCT3,PRKACA,CSNK1E,CCT8,CDK1,DYNC1I2,GBF1,GLUD1,NDE1,WDR19,TBL1XR1,CLASP1,PCNT,SAMM50,CHCHD6,TRIP11,PRKAA2,DCTN3,MAPRE1,CEP290,CCT2,MEF2C,PRKAR…	1.21222	0.277282	63	161
NEGATIVE REGULATION OF VIRAL GENOME REPLICATION%GOBP%GO:0045071	NEGATIVE REGULATION OF VIRAL GENOME REPLICATION%GOBP%GO:0045071	0.0657021	0.224831	-1	IFI16,ZC3HAV1,BST2,IFIT5,INPP5K,ILF3,EIF2AK2	-1.42372	-0.52964	7	19
RESPONSE TO BIOTIC STIMULUS%GOBP%GO:0009607	RESPONSE TO BIOTIC STIMULUS%GOBP%GO:0009607	0.0658212	0.224946	-1	GGT3P,LGALS8,SERPINB9,BAIAP2L1,CLU,YES1,COLEC11,CPS1,LIAS,IFI16,MFHAS1,ADAM17,SP100,HMGA1,ZC3HAV1,WFS1,PHB,SIRPA,ADAR,LYN,MOV10,TRIM25,PDE12,BST2,PAK1,NOD1,APAF1,ENO1,RRP1B,SHPK,DDX58,AXL,SETD2,SHMT2,GBP1,BNIP3,PRKCD,HLA-A,MTDH,IFIT5,PML,PQBP1,PDCD4,RHOA,ZMYND11,JAK1,ADAM9,SMC1A,TRIM27,CDK6,CTR9,VAMP7,BAIAP2,SERPINE1,CD36,AKAP1,SRC,SAP30BP,CAV1,CACTIN,S100A8,MFAP4	-1.22296	-0.296882	62	244
TUMOR NECROSIS FACTOR-MEDIATED SIGNALING PATHWAY%GOBP%GO:0033209	TUMOR NECROSIS FACTOR-MEDIATED SIGNALING PATHWAY%GOBP%GO:0033209	0.0659498	0.224946	1	EIF5A,TRAF6,TXNDC17,ILK,TRAF3,IKBKB,FOXO3	1.43597	0.516563	7	17
RAS PATHWAY%PANTHER PATHWAY%P04393	RAS PATHWAY%PANTHER PATHWAY%P04393	0.0659529	0.224946	-1	NRAS,NRAS,NRAS,ATF2,ATF2,KRAS,KRAS,KRAS,RALB,RALB,PAK1,PAK1,HRAS,HRAS,JUN,JUN,PLD1,PLD1	-1.28918	-0.342287	18	113
MEMBRANE TRAFFICKING%REACTOME%R-HSA-199991.6	MEMBRANE TRAFFICKING%REACTOME%R-HSA-199991.6	0.0659649	0.224946	1	MAP1LC3B,ANK1,BICD2,CYTH2,DENND1B,DENND5A,HSPA8,RABEP1,SNX2,TBC1D17,NAA30,GNS,RAB3GAP1,TRAPPC3,SNAP91,RAB3GAP2,GOSR2,RAB9B,ALS2,SEC31A,TSC2,TRAPPC1,CHMP7,CHMP3,RABGEF1,TPD52L1,COPS4,KIF21A,NAPB,TBC1D4,SYNJ2,DENND5B,SH3GL3,ARRB1,PAFAH1B2,TRAPPC13,DYNC1H1,ACTR10,AAK1,ARPC1A,PAFAH1B3,SH3D19,DENND4C,DENND6A,VPS37C,YWHAB,SNX5,DCTN5,KLC1,ASPSCR1,ARFGAP2,COPS2,VPS51,TRAPPC9,DYNC1I1,COG1,DENND4A,YKT6,SOR…	1.13749	0.233445	114	441
REGULATION OF INFLAMMATORY RESPONSE%GOBP%GO:0050727	REGULATION OF INFLAMMATORY RESPONSE%GOBP%GO:0050727	0.0662281	0.225647	-1	GGT3P,VAMP8,YES1,BRD4,MFHAS1,APOA1,METRNL,SIRPA,LYN,SHPK,FURIN,PRKCD,PDCD4,VAMP7,SERPINE1,SRC,ADAMTS12,S100A8,AGT	-1.32783	-0.372658	19	78
PEPTIDE HORMONE METABOLISM%REACTOME DATABASE ID RELEASE 77%2980736	PEPTIDE HORMONE METABOLISM%REACTOME DATABASE ID RELEASE 77%2980736	0.0663038	0.225709	-1	RAB27A,GNB1,CTNNB1,CTSZ,KIF5C,AGT,INS,INHBE,CPE,BCHE,SPCS2,EXOC2	-1.40156	-0.473422	12	29
NEGATIVE REGULATION OF ENDOPEPTIDASE ACTIVITY%GOBP%GO:0010951	NEGATIVE REGULATION OF ENDOPEPTIDASE ACTIVITY%GOBP%GO:0010951	0.0664881	0.22614	-1	RECK,SERPINB1,SERPINB9,IFI16,PLAUR,TRIAP1,CD44,VTN,FABP1,SERPINE2,SERPINA1,THBS1,TIMP3,SERPINE1,GAS6,SRC,AGT	-1.34468	-0.401862	17	55
PROTEIN SUMOYLATION%GOBP%GO:0016925	PROTEIN SUMOYLATION%GOBP%GO:0016925	0.0666667	0.226551	-1	PIAS2,RANBP2,ZBED1,NSMCE2,UBA2,SUMO2,SUMO4,ZNF451,SAE1,SUMO1	-1.44001	-0.556471	10	16
REGULATION OF MRNA PROCESSING%GOBP%GO:0050684	REGULATION OF MRNA PROCESSING%GOBP%GO:0050684	0.0668299	0.226755	-1	AHCYL1,RAVER2,NCL,RAVER1,RNPS1,SRSF9,SF1,SRSF4,HNRNPU,RNF40,CTR9,METTL16,ZC3H3,NSRP1,SON,SNW1,RBM25,THRAP3,ZC3H14,CDC73,RBFOX2,FAM172A,ZBTB7A,RNF20,NUP98,RBMXL1,SLTM,SAFB,LARP7,NCBP1,PAF1,NCBP2,WTAP,SMU1,PUF60,RBM15B,NELFE,CCNT1,QKI,SAP18,YTHDC1,LEO1,SUPT6H,CDK9,SAFB2,CELF1,DDX17,MBNL2,RBMX,CWC22,SFSWAP	-1.29283	-0.347102	51	104
POSITIVE REGULATION OF TRANSLATIONAL INITIATION%GOBP%GO:0045948	POSITIVE REGULATION OF TRANSLATIONAL INITIATION%GOBP%GO:0045948	0.0668598	0.226755	1	HABP4,YTHDF3,YTHDF2,LARP1,EIF2B5,MTOR,RPS6KB2	1.4341	0.50894	7	18
POSITIVE REGULATION OF TRANSMEMBRANE RECEPTOR PROTEIN SERINE/THREONINE KINASE SIGNALING PATHWAY%GOBP%GO:0090100	POSITIVE REGULATION OF TRANSMEMBRANE RECEPTOR PROTEIN SERINE/THREONINE KINASE SIGNALING PATHWAY%GOBP%GO:0090100	0.0669316	0.226755	-1	BMP10,ENG,BMP7,ADAM17,GDF15,NUMA1,STK11,THBS1,ING2,RBPJ,SDCBP,TGFBR1,SNW1,LEFTY2,TWSG1,INHBE,EP300,TBX20,GDF6,TGFB1,BMP5	-1.36844	-0.424108	21	44
CARTILAGE DEVELOPMENT%GOBP%GO:0051216	CARTILAGE DEVELOPMENT%GOBP%GO:0051216	0.0669992	0.226755	-1	COL2A1,STC1,COL11A2,CD44,ATP7A,BMP1	-1.41041	-0.48761	6	26
B CELL ACTIVATION%PANTHER PATHWAY%P00010	B CELL ACTIVATION%PANTHER PATHWAY%P00010	0.067059	0.226755	-1	NRAS,NRAS,ITPR1,ITPR1,ITPR3,ITPR3,LYN,LYN,HRAS,HRAS,JUN,JUN,PRKCD,PRKCD,RAC1,RAC1,RAC1	-1.34651	-0.395508	17	59
I-KAPPAB KINASE/NF-KAPPAB SIGNALING%GOBP%GO:0007249	I-KAPPAB KINASE/NF-KAPPAB SIGNALING%GOBP%GO:0007249	0.0670732	0.226755	1	TBKBP1,TRAF6,NKIRAS2,IKBKB,NKIRAS1,REL,TANK,MAP3K7,ERC1,ROCK2,NFKBIL1	1.41871	0.48861	11	20
CELLULAR RESPONSE TO AMINO ACID STARVATION%GOBP%GO:0034198	CELLULAR RESPONSE TO AMINO ACID STARVATION%GOBP%GO:0034198	0.0671752	0.226897	1	TFEB,RRAGC,EIF2S1,MAPK1,EIF2AK3,MTOR,DAP,FAS,PRKD1,WDR24,SH3GLB1	1.4167	0.475257	11	22
POSITIVE REGULATION OF ERK1 AND ERK2 CASCADE%GOBP%GO:0070374	POSITIVE REGULATION OF ERK1 AND ERK2 CASCADE%GOBP%GO:0070374	0.0673183	0.226897	-1	ICAM1,MFHAS1,CD44,PHB,ROR2,BMPER,NPNT,NRP1,HRAS,HAND2,PDGFB,FGG,PDGFC,RAP1A,CIB1,FGF2,GAS6,CD36	-1.34723	-0.403555	18	54
POSITIVE REGULATION OF CANONICAL WNT SIGNALING PATHWAY%GOBP%GO:0090263	POSITIVE REGULATION OF CANONICAL WNT SIGNALING PATHWAY%GOBP%GO:0090263	0.0673943	0.226897	1	BAMBI,PIN1,DAPK3,SEMA5A,LGR4,WLS,GSKIP,SMURF2,PPM1B,AMER1,NFKB1,ILK,VCP,LYPD6,PPM1A,USP47,ZEB2,XIAP	1.3358	0.367459	18	52
PROTEIN LOCALIZATION TO ORGANELLE%GOBP%GO:0033365	PROTEIN LOCALIZATION TO ORGANELLE%GOBP%GO:0033365	0.0674027	0.226897	1	KLHL21,RANBP6,TIMM17A,TNPO1,KPNA2,PTTG1IP,BICD2,HSPA8,LRSAM1,RABEP1,VPS35,RAB3GAP1,PCM1,ATP13A2,MFN2,PARK7,ARL3,RAB3GAP2,LAMP1,TSC2,CRIPT,ZFAND6,CHMP7,PRICKLE1,MAPRE2,CHCHD4,KPNA1,TIMM8B,TIMM13,HSP90AA1,IPO5,PEX12,IPO9,RPL23,TTC21B,VPS37C,UBL4A,TPP1,IPO13,ZFAND2B,BAG6,TOMM34,CSRP3,AP3D1,RPL11,YBX1,EHD1,SUPT7L,RER1,NCOA4,IPO8,PEX6,APPL1,MOAP1,TIMM50,CEP131,GAK,VPS4A,VPS36,IPO7,PEX3,TOLLIP,IPO4,DNA…	1.14846	0.239995	82	351
POSITIVE REGULATION OF HORMONE SECRETION%GOBP%GO:0046887	POSITIVE REGULATION OF HORMONE SECRETION%GOBP%GO:0046887	0.0674043	0.226897	-1	TRH,VAMP8,C2CD2L,NMB,FGG,VAMP7,STX4,ACSL4,INS,LRRC8A	-1.41847	-0.527687	10	19
REGULATION OF MRNA 3'-END PROCESSING%GOBP%GO:0031440	REGULATION OF MRNA 3'-END PROCESSING%GOBP%GO:0031440	0.0677338	0.227811	-1	AHCYL1,RNF40,CTR9,ZC3H3,ZC3H14,CDC73,RNF20,NCBP1,PAF1,NCBP2,NELFE,CCNT1,LEO1	-1.41308	-0.50284	13	23
RNA POLYMERASE II PRE-TRANSCRIPTION EVENTS%REACTOME%R-HSA-674695.3	RNA POLYMERASE II PRE-TRANSCRIPTION EVENTS%REACTOME%R-HSA-674695.3	0.0681048	0.228788	-1	ERCC2,GTF2B,POLR2I,SSRP1,POLR2D,CTR9,ELL,NELFB,SUPT16H,MLLT3,RTF1,CDC73,AFF4,CCNK,NELFCD,TAF6,NELFA,NCBP1,PAF1,NCBP2,GTF2E1,NELFE,CCNT1,GTF2E2,TAF1,TAF9,LEO1,SUPT6H,TAF5,CCNT2,POLR2G	-1.34157	-0.389908	31	63
NECTIN ADHESION PATHWAY%PATHWAY INTERACTION DATABASE NCI-NATURE CURATED DATA%NECTIN ADHESION PATHWAY	NECTIN ADHESION PATHWAY%PATHWAY INTERACTION DATABASE NCI-NATURE CURATED DATA%NECTIN ADHESION PATHWAY	0.0682048	0.228788	-1	F11R,CDH1,FARP2,CTNNA1,IQGAP1,PIP5K1C,PDGFB,RAP1B,CTNNB1,RAP1A,RAC1,SRC	-1.40677	-0.496215	12	24
POSITIVE REGULATION OF MONONUCLEAR CELL MIGRATION%GOBP%GO:0071677	POSITIVE REGULATION OF MONONUCLEAR CELL MIGRATION%GOBP%GO:0071677	0.0682048	0.228788	-1	MOSPD2,ANO6,ADAM17,ADAM10,RHOA,SERPINE1,GAS6	-1.41838	-0.508918	7	22
RIBONUCLEOTIDE CATABOLIC PROCESS%GOBP%GO:0009261	RIBONUCLEOTIDE CATABOLIC PROCESS%GOBP%GO:0009261	0.0683761	0.228788	1	NUDT16,ENTPD4,NT5C2,PDE4D,NUDT11,NUDT3,NUDT4,MLYCD,HINT1	1.43573	0.526694	9	16
PURINE RIBONUCLEOTIDE CATABOLIC PROCESS%GOBP%GO:0009154	PURINE RIBONUCLEOTIDE CATABOLIC PROCESS%GOBP%GO:0009154	0.0683761	0.228788	1	NUDT16,ENTPD4,NT5C2,PDE4D,NUDT11,NUDT3,NUDT4,MLYCD,HINT1	1.43573	0.526694	9	16
NEGATIVE REGULATION OF INTRACELLULAR STEROID HORMONE RECEPTOR SIGNALING PATHWAY%GOBP%GO:0033144	NEGATIVE REGULATION OF INTRACELLULAR STEROID HORMONE RECEPTOR SIGNALING PATHWAY%GOBP%GO:0033144	0.0684255	0.228788	-1	PHB,SFRP1,CRY2,HDAC1,PIAS2	-1.41531	-0.526512	5	19
CELLULAR AMINO ACID CATABOLIC PROCESS%GOBP%GO:0009063	CELLULAR AMINO ACID CATABOLIC PROCESS%GOBP%GO:0009063	0.0685127	0.228788	-1	ARG2,GLDC,SARDH,MAT1A,AMT,ALDH6A1,GLS,SHMT2,OAT,AASS,HMGCL	-1.3586	-0.41531	11	47
CHROMATIN ORGANIZATION%GOBP%GO:0006325	CHROMATIN ORGANIZATION%GOBP%GO:0006325	0.0685133	0.228788	-1	HMGN4,ATF2,ZZZ3,PRDM16,CENPV,HELLS,HMGA1,LOXL2,PARP2,PHB,HMGN1,SPTY2D1,RCOR2,DPY30,SMARCD2,KDM2B,NASP,PAK1,SMCHD1,HDAC1,PHF8,WAC,KDM3B,MTF2,KDM4B,SETD2,PHF2,PRKCD,KDM5B,KDM3A,CUL4B,KDM5A,KDM5C,CBX3,YEATS2,EZH1,ZNF335,SART3,SIN3A,RNF40,KDM4C,RPS6KA5,BRPF1,SMARCD1,BPTF,PBRM1,CTR9,RSF1,ARID1A,PHF14,RBBP5,PHF20L1,MSL1,ENY2,HIRA,BAZ2A,VRK1,TCF7L1,RCOR1,SUPT16H,BMI1,RYBP,KDM1A,ACTL6A,RRP8,RCOR3,UFL1,EH…	-1.20904	-0.287274	96	313
AXON DEVELOPMENT%GOBP%GO:0061564	AXON DEVELOPMENT%GOBP%GO:0061564	0.068549	0.228788	-1	LAMA2,VSTM2L,LAMC2,STXBP1,EFNB3,BSG,FOLR1,LAMA3,LAMA5,LAMA1,EPHB2,NRP2,SEMA4B,ANK3,NRP1,S100A6,SEMA4D,LMTK2,PLXND1,SEMA3C,NCAM1,SEMA4C,NOTCH3,NPTN,RAB10,ALCAM,KIF5C,RPS6KA5,RHOG,ROBO2,RAC1,BAIAP2	-1.27739	-0.334606	32	124
BIOCARTA_FAS_PATHWAY%MSIGDB_C2%BIOCARTA_FAS_PATHWAY	BIOCARTA_FAS_PATHWAY%MSIGDB_C2%BIOCARTA_FAS_PATHWAY	0.0689359	0.229453	-1	PTPN13,PARP1,PAK1,JUN,LMNB2	-1.42688	-0.544356	5	17
INTERMEDIATE FILAMENT CYTOSKELETON ORGANIZATION%GOBP%GO:0045104	INTERMEDIATE FILAMENT CYTOSKELETON ORGANIZATION%GOBP%GO:0045104	0.0689362	0.229453	-1	PPL,DSP,PLEC,KRT18,DES,FAM83H,TCHH	-1.41363	-0.525886	7	19
ACYL-COA METABOLIC PROCESS%GOBP%GO:0006637	ACYL-COA METABOLIC PROCESS%GOBP%GO:0006637	0.0689819	0.229453	-1	ACOT1,SUCLG2,ACSF2,HSD17B12,ACSL3,NUDT19,OXSM,GLYAT,HACD2,PDHX,ACSL4,PPT1,HACD1,SLC25A1,ACSF3	-1.35963	-0.419544	15	45
THIOESTER METABOLIC PROCESS%GOBP%GO:0035383	THIOESTER METABOLIC PROCESS%GOBP%GO:0035383	0.0689819	0.229453	-1	ACOT1,SUCLG2,ACSF2,HSD17B12,ACSL3,NUDT19,OXSM,GLYAT,HACD2,PDHX,ACSL4,PPT1,HACD1,SLC25A1,ACSF3	-1.35963	-0.419544	15	45
ALPHA-AMINO ACID CATABOLIC PROCESS%GOBP%GO:1901606	ALPHA-AMINO ACID CATABOLIC PROCESS%GOBP%GO:1901606	0.0690784	0.229579	-1	ARG2,GLDC,SARDH,MAT1A,AMT,GLS,SHMT2,OAT,AASS	-1.38827	-0.456324	9	33
REGULATION OF LEUKOCYTE ACTIVATION%GOBP%GO:0002694	REGULATION OF LEUKOCYTE ACTIVATION%GOBP%GO:0002694	0.0691977	0.229781	-1	THY1,VAMP8,STXBP2,YES1,LOXL3,FLOT2,MFHAS1,EPHB2,CD55,SIRPA,LYN,SFRP1,MMP14,SHPK,TP53BP1,MAD2L2,AXL,HLA-A,THBS1,IGF2,THOC1,ZNF335,NKAP,VAMP7,GAS6,SRC,XRCC6,CAV1,STX4	-1.2861	-0.343109	29	109
REGULATION OF PROTEIN TYROSINE KINASE ACTIVITY%GOBP%GO:0061097	REGULATION OF PROTEIN TYROSINE KINASE ACTIVITY%GOBP%GO:0061097	0.0696379	0.231047	-1	THY1,ADAM17,RAP2C,MVP,PDGFB,GPRC5A,ERBB3,GAS6,SRC,RAP2B,CAV1,AGT	-1.38711	-0.449357	12	35
REGULATION OF ACTIN FILAMENT-BASED PROCESS%GOBP%GO:0032970	REGULATION OF ACTIN FILAMENT-BASED PROCESS%GOBP%GO:0032970	0.0702048	0.232731	-1	DSG2,STC1,BMP10,ADD2,DSC2,BAIAP2L1,F11R,SLC9A1,DSP,SYNPO2,ARHGEF5,IQGAP2,CTNNA3,ADD3,ADD1,JUP,FGF13,LRP1,ARHGAP28,APOA1,CAPG,TJP1,DLG1,CDC42EP1,IQGAP1,SFRP1,BST2,NRP1,WNT11,PAK1,CDC42EP4,HRAS,LIMA1,CACNA1C,SNX9,CGNL1,MYBPC3,PRKCD,RHOQ,RHOA,S100A10,TRIM27,RDX,RHOG,TWF2,RAC1,ARF6,BAIAP2	-1.22842	-0.301894	48	213
POSITIVE REGULATION OF TRANSPORTER ACTIVITY%GOBP%GO:0032411	POSITIVE REGULATION OF TRANSPORTER ACTIVITY%GOBP%GO:0032411	0.0704091	0.233212	-1	CACNB2,TESC,ATP1B1,SLC9A1,ATP1B2,EPHB2,CACNB3,ANK3,WNK2,ATP1B3,NOS1AP,PRKCD,RXRA,CACNA2D1,CHP1,PDZK1	-1.35529	-0.418205	16	45
ATP SYNTHESIS COUPLED ELECTRON TRANSPORT%GOBP%GO:0042773	ATP SYNTHESIS COUPLED ELECTRON TRANSPORT%GOBP%GO:0042773	0.0707421	0.23375	-1	SDHA,NDUFS1,COX7C,NDUFV2,NDUFS6,NDUFA5,NDUFV3,NDUFA12,NDUFA2,NDUFA9,NDUFA6,COX6A1,NDUFS5,NDUFS2,NDUFS4,UQCRB,UQCR10,NDUFC1,NDUFA7,CYCS,COX15,NDUFB3,NDUFA8,NDUFC2,NDUFA3,COA6	-1.33666	-0.399466	26	55
MITOCHONDRIAL ATP SYNTHESIS COUPLED ELECTRON TRANSPORT%GOBP%GO:0042775	MITOCHONDRIAL ATP SYNTHESIS COUPLED ELECTRON TRANSPORT%GOBP%GO:0042775	0.0707421	0.23375	-1	SDHA,NDUFS1,COX7C,NDUFV2,NDUFS6,NDUFA5,NDUFV3,NDUFA12,NDUFA2,NDUFA9,NDUFA6,COX6A1,NDUFS5,NDUFS2,NDUFS4,UQCRB,UQCR10,NDUFC1,NDUFA7,CYCS,COX15,NDUFB3,NDUFA8,NDUFC2,NDUFA3,COA6	-1.33666	-0.399466	26	55
PHOSPHATIDYLINOSITOL 3-KINASE SIGNALING%GOBP%GO:0014065	PHOSPHATIDYLINOSITOL 3-KINASE SIGNALING%GOBP%GO:0014065	0.0707502	0.23375	1	PIK3R1,PIK3CA,PTEN,SIRT2	1.42938	0.524366	4	16
PROCESSING OF INTRONLESS PRE-MRNAS%REACTOME DATABASE ID RELEASE 77%77595	PROCESSING OF INTRONLESS PRE-MRNAS%REACTOME DATABASE ID RELEASE 77%77595	0.0714894	0.235993	-1	CPSF2,FIP1L1,CPSF4,PCF11,PABPN1,CSTF3,NCBP1,NCBP2,CPSF3,CSTF2T,SYMPK,WDR33,CLP1	-1.40817	-0.523854	13	19
ORGANIC CYCLIC COMPOUND CATABOLIC PROCESS%GOBP%GO:1901361	ORGANIC CYCLIC COMPOUND CATABOLIC PROCESS%GOBP%GO:1901361	0.071814	0.236819	1	CRMP1,SULT1E1,PABPC4,ACAA1,CSDE1,SAMD4A,CTIF,DPYSL4,NUDT16,ENTPD4,RNH1,DPYSL3,EIF3E,AGO4,YTHDF2,NT5C2,DCTPP1,PDE4D,DDX5,LSM1,ZPR1,APEX1,NUDT5,SNX17,GSPT1,NUDT11,TET2,DXO,ENPP4,TTC37,RC3H1,NUDT1,SMG9,UPF1,NUDT15,CNOT10,VCP,DIS3L2,CNOT7,BLVRB,DPYSL5,QDPR,ADAL,SND1,SMG6,NT5C,EXOG,EDC3,NUDT3,SETMAR,EXOSC8	1.1892	0.266364	51	189
DNA-TEMPLATED TRANSCRIPTION, INITIATION%GOBP%GO:0006352	DNA-TEMPLATED TRANSCRIPTION, INITIATION%GOBP%GO:0006352	0.0718601	0.236819	-1	NCOA6,TFB2M,NAT14,MAZ,GTF2B,POLR2I,POLR2D,RSF1,TBPL2,BRF1,TAF6,MED7,UBTF,GTF2E1,TBPL1,TAF8,GTF2E2,TAF1,TAF9,TAF5,POLR2G,CDK9,MED23,SMARCA5,GTF3C1,E2F3	-1.35829	-0.420959	26	44
ADAPTIVE IMMUNE RESPONSE%GOBP%GO:0002250	ADAPTIVE IMMUNE RESPONSE%GOBP%GO:0002250	0.072153	0.237457	-1	CADM1,ADAM17,CD55,PHB,GNL1,HLA-A,IFNA8,SIPA1	-1.39988	-0.483971	8	26
EPHA2 FORWARD SIGNALING%PATHWAY INTERACTION DATABASE NCI-NATURE CURATED DATA%EPHA2 FORWARD SIGNALING	EPHA2 FORWARD SIGNALING%PATHWAY INTERACTION DATABASE NCI-NATURE CURATED DATA%EPHA2 FORWARD SIGNALING	0.0721747	0.237457	1	PIK3R1,PIK3CA,BCAR1,EPHA2,ACP1,ARHGAP35,SHC1	1.4256	0.522979	7	16
HIV LIFE CYCLE%REACTOME%R-HSA-162587.3	HIV LIFE CYCLE%REACTOME%R-HSA-162587.3	0.0723944	0.23798	-1	PSIP1,HMGA1,ERCC2,NUP85,AAAS,TPR,NUP35,NUP62,CHMP4C,FURIN,RNMT,GTF2B,NUP153,NUP54,POLR2I,SSRP1,POLR2D,ELL,NUP50,XRCC5,NUP155,RANBP2,XRCC6,VPS37A,NELFB,SUPT16H,RAE1,NMT2,CCNK,NUP88,NELFCD,TAF6,NELFA,NUP160,NCBP1,CHMP6,NCBP2,RCC1,NUP210,NUP107,NDC1,GTF2E1,NELFE,CCNT1,GTF2E2,TAF1,TAF9,NUP214,TAF5,NUP133,CCNT2,POLR2G	-1.26846	-0.333475	52	121
RESPONSE TO EXTERNAL BIOTIC STIMULUS%GOBP%GO:0043207	RESPONSE TO EXTERNAL BIOTIC STIMULUS%GOBP%GO:0043207	0.0725269	0.238017	-1	GGT3P,LGALS8,SERPINB9,BAIAP2L1,CLU,YES1,COLEC11,CPS1,LIAS,IFI16,MFHAS1,ADAM17,SP100,HMGA1,ZC3HAV1,PHB,SIRPA,ADAR,LYN,MOV10,TRIM25,PDE12,BST2,NOD1,ENO1,RRP1B,SHPK,DDX58,AXL,SETD2,SHMT2,GBP1,BNIP3,PRKCD,HLA-A,MTDH,IFIT5,PML,PQBP1,PDCD4,RHOA,ZMYND11,JAK1,ADAM9,TRIM27,CDK6,CTR9,VAMP7,BAIAP2,SERPINE1,CD36,AKAP1,SRC,SAP30BP,CAV1,CACTIN,S100A8,MFAP4	-1.22005	-0.298555	58	226
RESPONSE TO OTHER ORGANISM%GOBP%GO:0051707	RESPONSE TO OTHER ORGANISM%GOBP%GO:0051707	0.0725269	0.238017	-1	GGT3P,LGALS8,SERPINB9,BAIAP2L1,CLU,YES1,COLEC11,CPS1,LIAS,IFI16,MFHAS1,ADAM17,SP100,HMGA1,ZC3HAV1,PHB,SIRPA,ADAR,LYN,MOV10,TRIM25,PDE12,BST2,NOD1,ENO1,RRP1B,SHPK,DDX58,AXL,SETD2,SHMT2,GBP1,BNIP3,PRKCD,HLA-A,MTDH,IFIT5,PML,PQBP1,PDCD4,RHOA,ZMYND11,JAK1,ADAM9,TRIM27,CDK6,CTR9,VAMP7,BAIAP2,SERPINE1,CD36,AKAP1,SRC,SAP30BP,CAV1,CACTIN,S100A8,MFAP4	-1.22005	-0.298555	58	226
SYNTHESIS OF DNA%REACTOME DATABASE ID RELEASE 77%69239	SYNTHESIS OF DNA%REACTOME DATABASE ID RELEASE 77%69239	0.0727788	0.238644	1	PSME4,UBE2S,PSMF1,UBE2D1,PSMD9,PSME3,UBE2E1,PSMD5,GINS4,PSMA5,PCNA,ANAPC5,PSMB6,PSMD4,CCNE1,PSMA1,ANAPC7,PSMA7,PSMB3,PSMB4,POLE2,ANAPC1,UBA52,POLA1,ANAPC4,PSMA6,CDK2,PSMD11,ORC5	1.25481	0.310492	29	93
PROTEIN MATURATION%GOBP%GO:0051604	PROTEIN MATURATION%GOBP%GO:0051604	0.0732242	0.239904	-1	ASPH,TESC,CPM,CISD3,IFI16,ADAMTS3,AEBP1,ADAM17,ADAM10,WFS1,CPXM1,TSPAN15,MMP14,STOML2,FURIN,FGG,CTSZ,FKBP1B,LIPT1,LIPT2,PCSK6,PCSK5	-1.28846	-0.348955	22	99
CHOLESTEROL TRANSPORT%GOBP%GO:0030301	CHOLESTEROL TRANSPORT%GOBP%GO:0030301	0.0738957	0.241624	-1	CLU,APOA1,LIPG,ABCA8,LIMA1,PIP4K2A,LDLRAP1,CD36,CAV1,SYT7,STX12	-1.39158	-0.473999	11	28
STEROL TRANSPORT%GOBP%GO:0015918	STEROL TRANSPORT%GOBP%GO:0015918	0.0738957	0.241624	-1	CLU,APOA1,LIPG,ABCA8,LIMA1,PIP4K2A,LDLRAP1,CD36,CAV1,SYT7,STX12	-1.39158	-0.473999	11	28
BONE DEVELOPMENT%GOBP%GO:0060348	BONE DEVELOPMENT%GOBP%GO:0060348	0.0739338	0.241624	-1	FREM1,STC1,ZNF385A,GNAS,SEMA4D,RAB23,RHOA,SRC,CER1,SH3PXD2B,ANXA2,TGM2,TP53	-1.37679	-0.456408	13	32
B CELL ACTIVATION%GOBP%GO:0042113	B CELL ACTIVATION%GOBP%GO:0042113	0.0740315	0.241742	-1	ADAM17,EPHB2,DOCK11,PHB,IFNA8,TPD52,TCF3,EXOSC6,LRRC8A,ZBTB7A,AKAP17A,EXOSC3,MSH6,DNAJB9,PHB2,MSH2,ATM,PTPN2,HDAC5	-1.37116	-0.443102	19	36
MACROAUTOPHAGY%GOBP%GO:0016236	MACROAUTOPHAGY%GOBP%GO:0016236	0.0743692	0.242643	1	MAP1LC3B,ATG101,MTMR3,ATP13A2,MFN2,UFC1,RB1CC1,CHMP3,ATG5,SQSTM1,TECPR1,ZFYVE1,VPS37C,WIPI1,ATG16L1,WDR45,MTMR14,VPS4A,VPS36,VCP,ATG14,ATG7,ATG9A,HGS,PIK3R4,VPS28,GABARAPL2,USP30,UBXN6,NSFL1C,TRAPPC8,VPS33A,TSG101,VPS39,PLAA,UFM1,ATG12,ATP2A2,CHMP4B,TBC1D5,EMC6	1.23476	0.296838	41	111
POSITIVE REGULATION OF UBIQUITIN-DEPENDENT PROTEIN CATABOLIC PROCESS%GOBP%GO:2000060	POSITIVE REGULATION OF UBIQUITIN-DEPENDENT PROTEIN CATABOLIC PROCESS%GOBP%GO:2000060	0.0746105	0.243228	1	RNF14,RCHY1,PTEN,NUB1,SIRT2,PRICKLE1,HECTD1,ARIH1,USP5,ARIH2,VCP,ZYG11B,CCDC22,GSK3B,HSPBP1,KEAP1	1.31689	0.358907	16	54
RAC1 SIGNALING PATHWAY%PATHWAY INTERACTION DATABASE NCI-NATURE CURATED DATA%RAC1 SIGNALING PATHWAY	RAC1 SIGNALING PATHWAY%PATHWAY INTERACTION DATABASE NCI-NATURE CURATED DATA%RAC1 SIGNALING PATHWAY	0.0748006	0.243563	-1	ATF2,CDH1,CTNNA1,IQGAP1,PIP5K1A,PIP5K1C,PAK1,JUN,CTNNB1,RAC1,RACGAP1,BAIAP2	-1.36279	-0.429381	12	40
NEGATIVE REGULATION OF TRANSCRIPTION BY RNA POLYMERASE II%GOBP%GO:0000122	NEGATIVE REGULATION OF TRANSCRIPTION BY RNA POLYMERASE II%GOBP%GO:0000122	0.0748374	0.243563	-1	ZNF589,PRDM16,IFI16,AEBP1,SP100,LOXL2,WFS1,HEY2,DLG1,PHF21A,PHB,PARP1,ZNF436,KDM2B,LYAR,GTF2IRD1,CRY2,SCAF4,SEMA4D,HDAC1,NKX2-5,ENO1,TPR,CBX8,DPF2,JUN,PDGFB,MTF2,CBX5,MAD2L2,MECP2,CREM,THRA,AASS,MTDH,MAZ,ZNF281,ZNF555,YEATS2,IGF2,EZH1,HNRNPU,RXRA,SIN3A,SCAF8,TRIM27,BPTF,NKAP,IKZF5,NOG,CTR9,RBPJ,ZNF248,NR2C2,ATN1,RREB1,YY1,SDCBP,CAV1,ZNF148,TCF3,SNW1,BMI1,ZNF8,RTF1,KDM1A,E2F6,GATAD2A,CHD8,ZNF217,B…	-1.20242	-0.286066	94	307
REGULATION OF ION TRANSMEMBRANE TRANSPORT%GOBP%GO:0034765	REGULATION OF ION TRANSMEMBRANE TRANSPORT%GOBP%GO:0034765	0.0752915	0.244485	-1	AHCYL1,THY1,ATP1A2,CACNB2,TESC,ATP1B1,KCNAB2,SLC9A1,ATP1B2,FXYD1,ANO6,FGF13,EPHB2,SLC9A3R1,CACNB3,DLG1,ANK3,CACNA1C,WNK2,ATP1B3,NOS1AP,KCNJ8,ATP2B4,KCNQ1,FXYD6,FKBP1B,CACNA2D1,ISCU,HRC,UTRN,JPH1,CHP1,CAV1,PDZK1	-1.26732	-0.331969	34	124
STRESS-ACTIVATED MAPK CASCADE%GOBP%GO:0051403	STRESS-ACTIVATED MAPK CASCADE%GOBP%GO:0051403	0.0752953	0.244485	1	ARHGEF6,MAPK1,IKBKB,MAP4K3,MAPK14,ZFP36L1,ZFP36,MAPK9,MAP2K7,MAP2K4,MAP3K7	1.39771	0.468884	11	22
IL-7%NETPATH%IL-7	IL-7%NETPATH%IL-7	0.0753077	0.244485	1	PIK3R1,MAPK1,FOXO1,SHC1,BAD,GSK3B,FYN,FOXO3	1.41065	0.50062	8	18
POLYOL METABOLIC PROCESS%GOBP%GO:0019751	POLYOL METABOLIC PROCESS%GOBP%GO:0019751	0.0754039	0.244595	1	ASAH1,INPP4B,ISYNA1,GOT1,DHFR,PTEN,PGP,SYNJ2,GBA,NUDT11,SORD,INPP4A,QDPR,NUDT3,IMPA1,NUDT4,IP6K1,SPTLC2,ABCA2,PPIP5K2	1.35362	0.406509	20	35
CALCIUM ION HOMEOSTASIS%GOBP%GO:0055074	CALCIUM ION HOMEOSTASIS%GOBP%GO:0055074	0.0755627	0.244706	-1	STC1,THY1,ATP1A2,ATP2B1,ATP1B1,ITPR1,WFS1,CD55,LPAR2,CACNB3,ITPR3,P2RX4,CHERP,CACNA1C,STOML2,PML,STC2,NPTN,ATP2B4,FKBP1B,VAPB,SLC25A23,CACNA2D1,HRC,HSP90B1,FGF2,JPH1,CD36,CAV1,PDZD8,CAPN3,ATP2C1,TGM2,PSEN1	-1.28401	-0.34775	34	99
CELLULAR CALCIUM ION HOMEOSTASIS%GOBP%GO:0006874	CELLULAR CALCIUM ION HOMEOSTASIS%GOBP%GO:0006874	0.0755627	0.244706	-1	STC1,THY1,ATP1A2,ATP2B1,ATP1B1,ITPR1,WFS1,CD55,LPAR2,CACNB3,ITPR3,P2RX4,CHERP,CACNA1C,STOML2,PML,STC2,NPTN,ATP2B4,FKBP1B,VAPB,SLC25A23,CACNA2D1,HRC,HSP90B1,FGF2,JPH1,CD36,CAV1,PDZD8,CAPN3,ATP2C1,TGM2,PSEN1	-1.28401	-0.34775	34	99
BRANCHING MORPHOGENESIS OF AN EPITHELIAL TUBE%GOBP%GO:0048754	BRANCHING MORPHOGENESIS OF AN EPITHELIAL TUBE%GOBP%GO:0048754	0.0761059	0.246059	-1	COL4A1,ENG,NPNT,NRP1,PAK1,CTNNB1,FGF2	-1.4226	-0.558532	7	15
MORPHOGENESIS OF A BRANCHING EPITHELIUM%GOBP%GO:0061138	MORPHOGENESIS OF A BRANCHING EPITHELIUM%GOBP%GO:0061138	0.0761059	0.246059	-1	COL4A1,ENG,NPNT,NRP1,PAK1,CTNNB1,FGF2	-1.4226	-0.558532	7	15
LIPID MODIFICATION%GOBP%GO:0030258	LIPID MODIFICATION%GOBP%GO:0030258	0.0766261	0.247349	1	ACAA1,ACADVL,ACOX3,ADH5,MTMR8,MTMR3,PTEN,SYNJ2,ACOT8,GBA,INPP5F,MTMR6,ECHS1,MTMR9,ACOX1,HSD17B10,ETFDH,ABCD3,IVD,ALOX12,GBA2,ECHDC1,DECR1,HACL1,HSD17B4	1.27935	0.328865	25	75
DNA REPLICATION%REACTOME DATABASE ID RELEASE 77%69306	DNA REPLICATION%REACTOME DATABASE ID RELEASE 77%69306	0.0766308	0.247349	1	PSME4,UBE2S,PSMF1,UBE2D1,PSMD9,PSME3,UBE2E1,PSMD5,GINS4,PSMA5,PCNA,ANAPC5,PSMB6,PSMD4,CCNE1,PSMA1,ANAPC7,PSMA7,PSMB3,PSMB4,POLE2,ANAPC1,UBA52,POLA1,ANAPC4,PSMA6,CDK2,PSMD11,ORC5	1.24374	0.307261	29	94
CXCR3-MEDIATED SIGNALING EVENTS%PATHWAY INTERACTION DATABASE NCI-NATURE CURATED DATA%CXCR3-MEDIATED SIGNALING EVENTS	CXCR3-MEDIATED SIGNALING EVENTS%PATHWAY INTERACTION DATABASE NCI-NATURE CURATED DATA%CXCR3-MEDIATED SIGNALING EVENTS	0.0768596	0.247804	-1	NRAS,GNAZ,KRAS,GNAI3,GNB1,GNAI2,HRAS	-1.38095	-0.46646	7	29
POSITIVE REGULATION OF COLD-INDUCED THERMOGENESIS%GOBP%GO:0120162	POSITIVE REGULATION OF COLD-INDUCED THERMOGENESIS%GOBP%GO:0120162	0.076898	0.247804	-1	GATM,PRDM16,MFAP2,ZNF516,GNAS,THRA,KDM3A,STAT6,PDGFC,CD36,CAV1,KDM1A,ESRRG,EHMT1	-1.36339	-0.437721	14	37
P38 SIGNALING MEDIATED BY MAPKAP KINASES%PATHWAY INTERACTION DATABASE NCI-NATURE CURATED DATA%P38 SIGNALING MEDIATED BY MAPKAP KINASES	P38 SIGNALING MEDIATED BY MAPKAP KINASES%PATHWAY INTERACTION DATABASE NCI-NATURE CURATED DATA%P38 SIGNALING MEDIATED BY MAPKAP KINASES	0.0773979	0.248963	1	MAPKAPK2,TSC2,HSPB1,YWHAB,RAF1,YWHAE,MAPK14	1.41509	0.519124	7	16
POSITIVE REGULATION OF PROTEIN KINASE B SIGNALING%GOBP%GO:0051897	POSITIVE REGULATION OF PROTEIN KINASE B SIGNALING%GOBP%GO:0051897	0.0774245	0.248963	-1	ENG,MFHAS1,GDF15,PHB,MYDGF,TSPYL5,P2RX4,OSBPL8,AXL,MTDH,MAZ,THBS1,IGF2,FGF2,GAS6,SRC,TGFBR1,ITGB1BP1	-1.34291	-0.416195	18	44
NEGATIVE REGULATION OF CELL GROWTH%GOBP%GO:0030308	NEGATIVE REGULATION OF CELL GROWTH%GOBP%GO:0030308	0.0775578	0.248963	-1	BMP10,FGF13,PHB,SEMA4B,SFRP1,BST2,WNT11,SEMA4D,ENO1,SEMA3C,SEMA4C,STK11,PML,EI24,CDKN2AIP,SIPA1,CDKN1B,PPT1,PPP1R9B,CCAR2,TP53,SEMA3B,SMARCA2,SIRT1,SMARCA4,TGFB1,NME6,PRDM11,DCUN1D3,CRLF3,HYAL2,SEMA6B,SEMA3F,SLIT2	-1.31128	-0.369772	34	76
NUCLEOSIDE METABOLIC PROCESS%GOBP%GO:0009116	NUCLEOSIDE METABOLIC PROCESS%GOBP%GO:0009116	0.077561	0.248963	1	MACROD2,NT5C2,ENPP4,NUDT1,NT5C3A,ADAL,TK1,UCKL1	1.39148	0.479234	8	20
SLC TRANSPORTER DISORDERS%REACTOME DATABASE ID RELEASE 77%5619102	SLC TRANSPORTER DISORDERS%REACTOME DATABASE ID RELEASE 77%5619102	0.0775806	0.248963	-1	BSG,SLC2A1,NUP85,AAAS,TPR,NUP35,NUP62,NUP153,NUP54,HEPH,SLC20A2,NUP50,NUP155,RANBP2,RAE1,SLC1A3,SLC16A1,NUP88,NUP160,NUP210,NUP107,NDC1	-1.3622	-0.434599	22	38
MODULATION OF PROCESS OF OTHER ORGANISM INVOLVED IN SYMBIOTIC INTERACTION%GOBP%GO:0051817	MODULATION OF PROCESS OF OTHER ORGANISM INVOLVED IN SYMBIOTIC INTERACTION%GOBP%GO:0051817	0.0776899	0.248963	-1	SERPINB9,ANO6,PHB,SP1,HDAC1,RRP1B,JUN,VAPA,VAPB,RXRA,SAP30BP,SNW1,DAG1,INPP5K,ZBED1,AQP1,EP300,CCNK,SMARCA4,TARDBP,NUCKS1,TBC1D20,HYAL2,PHB2,CCNT1	-1.33988	-0.40959	25	47
UNTITLED%PANTHER PATHWAY%P06664	UNTITLED%PANTHER PATHWAY%P06664	0.0777017	0.248963	-1	ATF2,GNB4,GNAQ,SLC2A1,GNAI3,SDF4,GNB1,GNAS,SP1,GNAI2,MMP14,HRAS,JUN,CACNA1C,GNB2,NFYA,CAMK2B,RAP1B,PRKCD,CTNNB1,JUND,POU2F1,RAC1,GNA11,SRC,CAV1,KSR1,TCF7L1,GNAI1,PKNOX1,SNRPN,YBX3,CDC42,EP300,DNM1,TGFB1,MAP4K2,PBX1,NFATC2,NFATC4,PRKCE	-1.2704	-0.337544	41	112
PID_CXCR3_PATHWAY%MSIGDB_C2%PID_CXCR3_PATHWAY	PID_CXCR3_PATHWAY%MSIGDB_C2%PID_CXCR3_PATHWAY	0.0777852	0.249027	-1	NRAS,GNAZ,KRAS,GNAI3,GNB1,HRAS	-1.38953	-0.485207	6	25
DNA-TEMPLATED TRANSCRIPTION, ELONGATION%GOBP%GO:0006354	DNA-TEMPLATED TRANSCRIPTION, ELONGATION%GOBP%GO:0006354	0.0778492	0.249029	-1	SETD2,POLR2I,SMARCD1,CDK12,CTR9,ARID1A,SUPT16H,RTF1,CDC73,PCID2,PAF1,CDK13,LEO1,SUPT6H,ADRM1,CDK9,CTDP1,SUPT4H1	-1.37971	-0.46604	18	29
CELLULAR RESPONSE TO NITROGEN COMPOUND%GOBP%GO:1901699	CELLULAR RESPONSE TO NITROGEN COMPOUND%GOBP%GO:1901699	0.0789643	0.252306	-1	PCK2,AHCYL1,ICAM1,CPS1,SLC9A1,FOLR1,JUP,CDH1,GNAQ,AGRN,RAB13,LRP1,GNAI3,PARP1,CTNNA1,GNB1,GNAS,LYN,P2RX4,SFRP1,PDE12,RALB,PIK3C2A,NOD1,DDX58,FLOT1,RAP1B,PRKCD,CTNNB1,RAB8B,IGFBP5,ATP2B4,KCNQ1,STAT6,RHOQ,PQBP1,IGF2,GNA14,RAB10,CACNA2D1,CA2,HSP90B1,RAP1A,BAIAP2,GNA11,CD36,SRC	-1.21861	-0.299481	47	213
SOMATIC DIVERSIFICATION OF IMMUNE RECEPTORS VIA GERMLINE RECOMBINATION WITHIN A SINGLE LOCUS%GOBP%GO:0002562	SOMATIC DIVERSIFICATION OF IMMUNE RECEPTORS VIA GERMLINE RECOMBINATION WITHIN A SINGLE LOCUS%GOBP%GO:0002562	0.0790665	0.252306	-1	LIG3,TCF3,EXOSC6,EXOSC3,MSH6,MSH2,HMGB2	-1.41585	-0.555883	7	15
SOMATIC CELL DNA RECOMBINATION%GOBP%GO:0016444	SOMATIC CELL DNA RECOMBINATION%GOBP%GO:0016444	0.0790665	0.252306	-1	LIG3,TCF3,EXOSC6,EXOSC3,MSH6,MSH2,HMGB2	-1.41585	-0.555883	7	15
IL3-MEDIATED SIGNALING EVENTS%PATHWAY INTERACTION DATABASE NCI-NATURE CURATED DATA%IL3-MEDIATED SIGNALING EVENTS	IL3-MEDIATED SIGNALING EVENTS%PATHWAY INTERACTION DATABASE NCI-NATURE CURATED DATA%IL3-MEDIATED SIGNALING EVENTS	0.0793427	0.252981	1	PIK3R1,PIK3CA,PTPN11,BCL2L1,SHC1	1.41863	0.52765	5	15
[truncated: 2,694 more rows]
