# Supplementary material for: Multi-Omics Profiling of Hypertrophic Cardiomyopathy Reveals Altered Mechanisms in Mitochondrial Dynamics and Excitation–Contraction Coupling
Source: Int J Mol Sci. 2023 Mar 1;24(5):4724. doi: 10.3390/ijms24054724 (PMC10002553; doi:10.3390/ijms24054724)
Supplement: Supplementary file 1 [file ijms-24-04724-s001.zip › Supp_Table_S3.xlsx]

## Sheet: (A) Proteomics
	Normalized Log2 Intensity, Row Z Score														MYH7-WT											Normalized Log2 Intensity
FEATURE	H2923	H5362	H2929	H5219	H5179	C2867	C2884	C2879	C2880	C3045	GENE	PROTEIN	UNIPROT	MAXFC	P.VALUE	ADJ.P.VAL	LOGFC	FASTA_HEADERS	UNIPROT_FUNCTION	UNIPROT_CELLULAR_LOCATION	UNIPROT_DISEASE	GO_BIOLOGICAL_PROCESS	GO_MOLECULAR_FUNCTION	GO_CELLULAR_COMPONENT	GO_ID	H2923.1	H5362.1	H2929.1	H5219.1	H5179.1	C2867.1	C2884.1	C2879.1	C2880.1	C3045.1
MYOF_Q9NZM1	1.04182	0.854867	0.866516	0.709396	1.17356	-1.03123	-1.13004	-0.882368	-1.07462	-0.527904	MYOF	Myoferlin	Q9NZM1	0.711195	4.24079e-07	0.00274082	0.711195	sp|Q9NZM1|MYOF_HUMAN Myoferlin OS=Homo sapiens OX=9606 GN=MYOF PE=1 SV=1	FUNCTION: Calcium/phospholipid-binding protein that plays a role in the plasmalemma repair mechanism of endothelial cells that permits rapid resealing of membranes disrupted by mechanical stress. Involved in endocytic recycling. Implicated in VEGF signal transduction by regulating the levels of the receptor KDR (By similarity). {ECO:0000250}.	SUBCELLULAR LOCATION: Cell membrane; Single-pass type II membrane protein. Nucleus membrane; Single-pass type II membrane protein. Cytoplasmic vesicle membrane; Single-pass type II membrane protein. Note=Concentrated at the membrane sites of both myoblast-myoblast and myoblast-myotube fusions. Detected at the plasmalemma in endothelial cells lining intact blood vessels (By similarity). Found at n…	DISEASE: Angioedema, hereditary, 7 (HAE7) [MIM:619366]: A form of angioedema, a disorder characterized by episodic local swelling involving subcutaneous or submucous tissue of the upper respiratory and gastrointestinal tracts, face, extremities, and genitalia. HAE7 is an autosomal dominant form characterized by onset of recurrent swelling of the face, lips, and oral mucosa in the second decade. {…	blood circulation [GO:0008015]; membrane fusion [GO:0061025]; muscle contraction [GO:0006936]; myoblast fusion [GO:0007520]; plasma membrane organization [GO:0007009]; plasma membrane repair [GO:0001778]; T-tubule organization [GO:0033292]	metal ion binding [GO:0046872]; phospholipid binding [GO:0005543]	caveola [GO:0005901]; cytoplasmic vesicle [GO:0031410]; cytoplasmic vesicle membrane [GO:0030659]; extracellular exosome [GO:0070062]; integral component of membrane [GO:0016021]; intracellular membrane-bounded organelle [GO:0043231]; nuclear envelope [GO:0005635]; nuclear membrane [GO:0031965]; plasma membrane [GO:0005886]	GO:0001778; GO:0005543; GO:0005635; GO:0005886; GO:0005901; GO:0006936; GO:0007009; GO:0007520; GO:0008015; GO:0016021; GO:0030659; GO:0031410; GO:0031965; GO:0033292; GO:0043231; GO:0046872; GO:0061025; GO:0070062	20.5926	20.5211	20.5255	20.4654	20.643	19.7993	19.7615	19.8562	19.7827	19.9919
SLC4A1_P02730	0.84946	0.725181	1.16057	1.09898	0.618804	-1.31334	-0.594022	-1.06941	-1.24008	-0.236144	SLC4A1	Band 3 anion transport protein	P02730	1.55818	3.60091e-06	0.00678873	1.55818	sp|P02730|B3AT_HUMAN Band 3 anion transport protein OS=Homo sapiens OX=9606 GN=SLC4A1 PE=1 SV=3	FUNCTION: Functions both as a transporter that mediates electroneutral anion exchange across the cell membrane and as a structural protein. Major integral membrane glycoprotein of the erythrocyte membrane; required for normal flexibility and stability of the erythrocyte membrane and for normal erythrocyte shape via the interactions of its cytoplasmic domain with cytoskeletal proteins, glycolytic …	SUBCELLULAR LOCATION: Cell membrane {ECO:0000269|PubMed:10926824, ECO:0000269|PubMed:24121512, ECO:0000269|PubMed:26542571, ECO:0000269|PubMed:7506871}; Multi-pass membrane protein {ECO:0000269|PubMed:26542571}. Basolateral cell membrane {ECO:0000269|PubMed:7506871}; Multi-pass membrane protein {ECO:0000269|PubMed:7506871}. Note=Detected in the erythrocyte cell membrane and on the basolateral mem…	DISEASE: Ovalocytosis, Southeast Asian (SAO) [MIM:166900]: A hereditary hematologic disorder characterized by ovalocytic erythrocytes that are rigid and exhibit reduced expression of many erythrocyte antigens. Clinical manifestations include mild hemolysis, intermittent jaundice and gallstones. However, the disorder is most often asymptomatic. {ECO:0000269|PubMed:1538405, ECO:0000269|PubMed:17223…	anion transport [GO:0006820]; bicarbonate transport [GO:0015701]; blood coagulation [GO:0007596]; cellular ion homeostasis [GO:0006873]; chloride transport [GO:0006821]; erythrocyte development [GO:0048821]; ion homeostasis [GO:0050801]; negative regulation of glycolytic process through fructose-6-phosphate [GO:1904539]; negative regulation of oxidoreductase activity [GO:0051354]; negative regula…	anion transmembrane transporter activity [GO:0008509]; anion:anion antiporter activity [GO:0015301]; ankyrin binding [GO:0030506]; bicarbonate transmembrane transporter activity [GO:0015106]; chloride transmembrane transporter activity [GO:0015108]; hemoglobin binding [GO:0030492]; inorganic anion exchanger activity [GO:0005452]; protein homodimerization activity [GO:0042803]; protein-membrane ad…	basolateral plasma membrane [GO:0016323]; blood microparticle [GO:0072562]; cortical cytoskeleton [GO:0030863]; cytoplasmic side of plasma membrane [GO:0009898]; extracellular exosome [GO:0070062]; integral component of membrane [GO:0016021]; integral component of plasma membrane [GO:0005887]; plasma membrane [GO:0005886]; Z disc [GO:0030018]	GO:0005452; GO:0005886; GO:0005887; GO:0006820; GO:0006821; GO:0006873; GO:0007596; GO:0008509; GO:0009898; GO:0015106; GO:0015108; GO:0015301; GO:0015701; GO:0016021; GO:0016323; GO:0017121; GO:0022857; GO:0030018; GO:0030492; GO:0030506; GO:0030863; GO:0035811; GO:0042803; GO:0043495; GO:0045852; GO:0048821; GO:0050801; GO:0051354; GO:0051453; GO:0055085; GO:0070062; GO:0072562; GO:0072659; GO:…	17.3732	17.2645	17.6453	17.5915	17.1714	15.4812	16.1104	15.6946	15.5453	16.4235
JAM2_P57087	1.2162	0.841544	0.964842	0.724723	0.824342	-1.06532	-0.350114	-1.14543	-0.798193	-1.21259	JAM2	Junctional adhesion molecule B	P57087	0.589168	4.38923e-06	0.00678873	0.589168	sp|P57087|JAM2_HUMAN Junctional adhesion molecule B OS=Homo sapiens OX=9606 GN=JAM2 PE=1 SV=1	FUNCTION: Junctional adhesion protein that mediates heterotypic cell-cell interactions with its cognate receptor JAM3 to regulate different cellular processes (PubMed:11590146, PubMed:11823489, PubMed:24357068). Plays a role in homing and mobilization of hematopoietic stem and progenitor cells within the bone marrow (PubMed:24357068). At the surface of bone marrow stromal cells, it contributes to…	SUBCELLULAR LOCATION: Cell membrane {ECO:0000269|PubMed:10779521, ECO:0000269|PubMed:11590146, ECO:0000269|PubMed:31851307}; Single-pass type I membrane protein {ECO:0000269|PubMed:10779521, ECO:0000269|PubMed:11590146}. Cell junction {ECO:0000269|PubMed:10779521, ECO:0000269|PubMed:10945976}. Cell junction, tight junction {ECO:0000250|UniProtKB:Q9JI59}. Note=Localized at tight junctions of both …	DISEASE: Basal ganglia calcification, idiopathic, 8, autosomal recessive (IBGC8) [MIM:618824]: A form of basal ganglia calcification, a genetically heterogeneous condition characterized by symmetric calcification in the basal ganglia and other brain regions. Affected individuals can either be asymptomatic or show a wide spectrum of neuropsychiatric symptoms, including parkinsonism, dystonia, trem…	cell-cell adhesion [GO:0098609]; cellular extravasation [GO:0045123]; hematopoietic stem cell migration to bone marrow [GO:0097241]; leukocyte cell-cell adhesion [GO:0007159]; leukocyte tethering or rolling [GO:0050901]; lymphocyte aggregation [GO:0071593]; maintenance of blood-brain barrier [GO:0035633]; myoblast fusion [GO:0007520]; negative regulation of myelination [GO:0031642]; positive regu…	integrin binding [GO:0005178]	bicellular tight junction [GO:0005923]; cell surface [GO:0009986]; cell-cell contact zone [GO:0044291]; integral component of plasma membrane [GO:0005887]; plasma membrane [GO:0005886]; protein complex involved in cell adhesion [GO:0098636]; somatodendritic compartment [GO:0036477]; tight junction [GO:0070160]	GO:0005178; GO:0005886; GO:0005887; GO:0005923; GO:0007159; GO:0007286; GO:0007520; GO:0009986; GO:0031642; GO:0035633; GO:0036477; GO:0044291; GO:0045123; GO:0050901; GO:0070160; GO:0071593; GO:0097241; GO:0098609; GO:0098636; GO:2000403	16.6366	16.5159	16.5556	16.4783	16.5104	15.9015	16.132	15.8757	15.9876	15.8541
FSTL1_Q12841	-1.44953	-0.495764	-1.09852	-0.353458	-1.06651	0.643458	0.990006	0.952057	1.18355	0.69471	FSTL1	Follistatin-related protein 1	Q12841	1.03469	4.66357e-06	0.00678873	-1.03469	sp|Q12841|FSTL1_HUMAN Follistatin-related protein 1 OS=Homo sapiens OX=9606 GN=FSTL1 PE=1 SV=1	FUNCTION: Secreted glycoprotein that is involved in various physiological processes, such as angiogenesis, regulation of the immune response, cell proliferation and differentiation (PubMed:29212066, PubMed:22265692). Plays a role in the development of the central nervous system, skeletal system, lungs, and ureter (By similarity). Promotes endothelial cell survival, migration and differentiation i…	SUBCELLULAR LOCATION: Secreted {ECO:0000305}.		cell differentiation [GO:0030154]; endothelial cell differentiation [GO:0045446]; endothelial cell migration [GO:0043542]; hematopoietic stem cell homeostasis [GO:0061484]; negative regulation of apoptotic process [GO:0043066]; regulation of BMP signaling pathway [GO:0030510]	calcium ion binding [GO:0005509]; heparin binding [GO:0008201]	endoplasmic reticulum lumen [GO:0005788]; extracellular exosome [GO:0070062]; extracellular region [GO:0005576]; extracellular space [GO:0005615]	GO:0005509; GO:0005576; GO:0005615; GO:0005788; GO:0008201; GO:0030154; GO:0030510; GO:0043066; GO:0043542; GO:0045446; GO:0061484; GO:0070062	15.8934	16.4461	16.0968	16.5285	16.1153	17.1062	17.3071	17.2851	17.4192	17.1359
MID1_O15344	1.22929	0.377236	0.351052	0.979842	1.50353	-1.05121	-0.811548	-0.863629	-0.965086	-0.749478	MID1	E3 ubiquitin-protein ligase Midline-1	O15344	1.22154	5.38892e-06	0.00678873	1.22154	sp|O15344|TRI18_HUMAN E3 ubiquitin-protein ligase Midline-1 OS=Homo sapiens OX=9606 GN=MID1 PE=1 SV=1	FUNCTION: Has E3 ubiquitin ligase activity towards IGBP1, promoting its monoubiquitination, which results in deprotection of the catalytic subunit of protein phosphatase PP2A, and its subsequent degradation by polyubiquitination. {ECO:0000269|PubMed:10400985, ECO:0000269|PubMed:11685209, ECO:0000269|PubMed:22613722}.	SUBCELLULAR LOCATION: Cytoplasm {ECO:0000269|PubMed:10077590}. Cytoplasm, cytoskeleton {ECO:0000269|PubMed:10077590}. Cytoplasm, cytoskeleton, spindle {ECO:0000269|PubMed:10077590}. Note=Microtubule-associated. It is associated with microtubules throughout the cell cycle, co-localizing with cytoplasmic fibers in interphase and with the mitotic spindle and midbodies during mitosis and cytokinesis.	DISEASE: Opitz GBBB syndrome 1 (GBBB1) [MIM:300000]: A congenital midline malformation syndrome characterized by hypertelorism, genital-urinary defects such as hypospadias in males and splayed labia in females, cleft lip/palate, laryngotracheoesophageal abnormalities, imperforate anus, developmental delay and congenital heart defects. {ECO:0000269|PubMed:11030761, ECO:0000269|PubMed:15558842, ECO…	microtubule cytoskeleton organization [GO:0000226]; negative regulation of microtubule depolymerization [GO:0007026]; pattern specification process [GO:0007389]; positive regulation of stress-activated MAPK cascade [GO:0032874]; protein localization to microtubule [GO:0035372]; regulation of microtubule cytoskeleton organization [GO:0070507]	enzyme binding [GO:0019899]; identical protein binding [GO:0042802]; microtubule binding [GO:0008017]; phosphoprotein binding [GO:0051219]; protein homodimerization activity [GO:0042803]; transferase activity [GO:0016740]; ubiquitin protein ligase binding [GO:0031625]; zinc ion binding [GO:0008270]	centriolar satellite [GO:0034451]; cytoplasm [GO:0005737]; cytosol [GO:0005829]; Golgi apparatus [GO:0005794]; microtubule [GO:0005874]; microtubule associated complex [GO:0005875]; spindle [GO:0005819]	GO:0000226; GO:0005737; GO:0005794; GO:0005819; GO:0005829; GO:0005874; GO:0005875; GO:0007026; GO:0007389; GO:0008017; GO:0008270; GO:0016740; GO:0019899; GO:0031625; GO:0032874; GO:0034451; GO:0035372; GO:0042802; GO:0042803; GO:0051219; GO:0070507	15.7297	15.1437	15.1257	15.5581	15.9182	14.1615	14.3263	14.2904	14.2207	14.3689
GPR116_Q8IZF2	-1.21484	-1.06411	-0.79383	-0.612046	-0.762838	0.493674	0.319493	1.17286	1.06666	1.39499	GPR116	Probable G-protein coupled receptor 116	Q8IZF2	0.766005	1.0296e-05	0.00678873	-0.766005	sp|Q8IZF2|AGRF5_HUMAN Adhesion G protein-coupled receptor F5 OS=Homo sapiens OX=9606 GN=ADGRF5 PE=1 SV=3	FUNCTION: Receptor that plays a critical role in lung surfactant homeostasis. May play a role in controlling adipocyte function. {ECO:0000250|UniProtKB:G5E8Q8}.	SUBCELLULAR LOCATION: Cell membrane {ECO:0000250|UniProtKB:Q9WVT0}; Multi-pass membrane protein {ECO:0000255}.		adenylate cyclase-activating G protein-coupled receptor signaling pathway [GO:0007189]; cell surface receptor signaling pathway [GO:0007166]; energy reserve metabolic process [GO:0006112]; erythrocyte development [GO:0048821]; fat cell differentiation [GO:0045444]; G protein-coupled receptor signaling pathway [GO:0007186]; glomerular filtration [GO:0003094]; glucose homeostasis [GO:0042593]; macr…	G protein-coupled receptor activity [GO:0004930]	apical part of cell [GO:0045177]; cell surface [GO:0009986]; cytoplasmic vesicle [GO:0031410]; integral component of membrane [GO:0016021]; plasma membrane [GO:0005886]	GO:0003094; GO:0004930; GO:0005886; GO:0006112; GO:0007166; GO:0007186; GO:0007189; GO:0008654; GO:0009986; GO:0016021; GO:0019216; GO:0031410; GO:0042116; GO:0042593; GO:0043031; GO:0043129; GO:0045177; GO:0045444; GO:0048821; GO:0061626; GO:0071073	10.7369	10.8018	10.9182	10.9965	10.9315	11.4725	11.3975	11.765	11.7192	11.8606
SPTA1_P02549	0.765306	0.93485	1.41525	0.919897	0.370156	-1.32851	-0.903391	-1.06479	-0.889569	-0.219203	SPTA1	Spectrin alpha chain, erythrocytic 1	P02549	1.03892	1.07336e-05	0.00678873	1.03892	sp|P02549|SPTA1_HUMAN Spectrin alpha chain, erythrocytic 1 OS=Homo sapiens OX=9606 GN=SPTA1 PE=1 SV=5	FUNCTION: Spectrin is the major constituent of the cytoskeletal network underlying the erythrocyte plasma membrane. It associates with band 4.1 and actin to form the cytoskeletal superstructure of the erythrocyte plasma membrane.	SUBCELLULAR LOCATION: Cytoplasm, cytoskeleton. Cytoplasm, cell cortex.	DISEASE: Elliptocytosis 2 (EL2) [MIM:130600]: A Rhesus-unlinked form of hereditary elliptocytosis, a genetically heterogeneous, autosomal dominant hematologic disorder. It is characterized by variable hemolytic anemia and elliptical or oval red cell shape. {ECO:0000269|PubMed:1541680, ECO:0000269|PubMed:1638030, ECO:0000269|PubMed:1679439, ECO:0000269|PubMed:1878597, ECO:0000269|PubMed:2384601, E…	actin cytoskeleton organization [GO:0030036]; actin filament capping [GO:0051693]; actin filament organization [GO:0007015]; hemopoiesis [GO:0030097]; lymphocyte homeostasis [GO:0002260]; plasma membrane organization [GO:0007009]; porphyrin-containing compound biosynthetic process [GO:0006779]; positive regulation of protein binding [GO:0032092]; positive regulation of T cell proliferation [GO:00…	actin filament binding [GO:0051015]; calcium ion binding [GO:0005509]; structural constituent of cytoskeleton [GO:0005200]	actin cytoskeleton [GO:0015629]; axon [GO:0030424]; cell junction [GO:0030054]; cell projection [GO:0042995]; cortical actin cytoskeleton [GO:0030864]; cuticular plate [GO:0032437]; cytosol [GO:0005829]; intrinsic component of the cytoplasmic side of the plasma membrane [GO:0031235]; plasma membrane [GO:0005886]; spectrin [GO:0008091]; spectrin-associated cytoskeleton [GO:0014731]	GO:0002260; GO:0005200; GO:0005509; GO:0005829; GO:0005886; GO:0006779; GO:0007009; GO:0007015; GO:0008091; GO:0008360; GO:0014731; GO:0015629; GO:0030036; GO:0030054; GO:0030097; GO:0030424; GO:0030864; GO:0031235; GO:0032092; GO:0032437; GO:0042102; GO:0042995; GO:0051015; GO:0051693	17.956	18.056	18.3392	18.0471	17.723	16.7216	16.9722	16.877	16.9803	17.3756
FKBP5_Q13451	-0.975413	-0.995424	-1.14179	-0.2975	-1.01047	0.682291	0.565795	1.49769	0.510911	1.16391	FKBP5	Peptidyl-prolyl cis-trans isomerase FKBP5;Peptidyl-prolyl cis-trans isomerase FKBP5, N-terminally processed	Q13451	0.855614	1.17193e-05	0.00678873	-0.855614	sp|Q13451|FKBP5_HUMAN Peptidyl-prolyl cis-trans isomerase FKBP5 OS=Homo sapiens OX=9606 GN=FKBP5 PE=1 SV=2	FUNCTION: Immunophilin protein with PPIase and co-chaperone activities (PubMed:11350175). Component of unligated steroid receptors heterocomplexes through interaction with heat-shock protein 90 (HSP90). Plays a role in the intracellular trafficking of heterooligomeric forms of steroid hormone receptors maintaining the complex into the cytoplasm when unliganded (PubMed:12538866). Acts as a regulat…	SUBCELLULAR LOCATION: Cytoplasm {ECO:0000250|UniProtKB:Q64378}. Nucleus {ECO:0000250|UniProtKB:Q64378}.		chaperone-mediated protein folding [GO:0061077]; protein folding [GO:0006457]; protein peptidyl-prolyl isomerization [GO:0000413]; response to bacterium [GO:0009617]	FK506 binding [GO:0005528]; heat shock protein binding [GO:0031072]; peptidyl-prolyl cis-trans isomerase activity [GO:0003755]	cytoplasm [GO:0005737]; cytosol [GO:0005829]; extracellular exosome [GO:0070062]; membrane [GO:0016020]; nucleoplasm [GO:0005654]	GO:0000413; GO:0003755; GO:0005528; GO:0005654; GO:0005737; GO:0005829; GO:0006457; GO:0009617; GO:0016020; GO:0031072; GO:0061077; GO:0070062	18.5812	18.5715	18.5007	18.9092	18.5642	19.3833	19.3269	19.7779	19.3004	19.6164
S100B_P04271	-1.53156	-1.0091	-0.878633	-0.125336	-0.840862	0.910327	1.13963	0.51285	1.12315	0.699542	S100B	Protein S100-B	P04271	1.14101	1.25922e-05	0.00678873	-1.14101	sp|P04271|S100B_HUMAN Protein S100-B OS=Homo sapiens OX=9606 GN=S100B PE=1 SV=2	FUNCTION: Weakly binds calcium but binds zinc very tightly-distinct binding sites with different affinities exist for both ions on each monomer. Physiological concentrations of potassium ion antagonize the binding of both divalent cations, especially affecting high-affinity calcium-binding sites. Binds to and initiates the activation of STK38 by releasing autoinhibitory intramolecular interaction…	SUBCELLULAR LOCATION: Cytoplasm {ECO:0000269|PubMed:9925766}. Nucleus {ECO:0000269|PubMed:9925766}.		axonogenesis [GO:0007409]; central nervous system development [GO:0007417]; learning or memory [GO:0007611]; memory [GO:0007613]; positive regulation of cell population proliferation [GO:0008284]; positive regulation of I-kappaB kinase/NF-kappaB signaling [GO:0043123]; regulation of neuronal synaptic plasticity [GO:0048168]	calcium ion binding [GO:0005509]; calcium-dependent protein binding [GO:0048306]; identical protein binding [GO:0042802]; protein homodimerization activity [GO:0042803]; RAGE receptor binding [GO:0050786]; S100 protein binding [GO:0044548]; tau protein binding [GO:0048156]; zinc ion binding [GO:0008270]	cytoplasm [GO:0005737]; cytosol [GO:0005829]; extracellular region [GO:0005576]; extracellular space [GO:0005615]; intracellular membrane-bounded organelle [GO:0043231]; neuronal cell body [GO:0043025]; nucleoplasm [GO:0005654]; nucleus [GO:0005634]; perinuclear region of cytoplasm [GO:0048471]; ruffle [GO:0001726]	GO:0001726; GO:0005509; GO:0005576; GO:0005615; GO:0005634; GO:0005654; GO:0005737; GO:0005829; GO:0007409; GO:0007417; GO:0007611; GO:0007613; GO:0008270; GO:0008284; GO:0042802; GO:0042803; GO:0043025; GO:0043123; GO:0043231; GO:0044548; GO:0048156; GO:0048168; GO:0048306; GO:0048471; GO:0050786	11.6741	12.014	12.0988	12.5888	12.1234	13.2625	13.4116	13.0039	13.4009	13.1254
SERPINA3_P01011	-0.847152	-0.96237	-1.27099	-0.364992	-0.916406	1.36474	0.998139	0.86527	0.058175	1.07558	SERPINA3	Alpha-1-antichymotrypsin;Alpha-1-antichymotrypsin His-Pro-less	P01011	1.82372	1.27491e-05	0.00678873	-1.82372	sp|P01011|AACT_HUMAN Alpha-1-antichymotrypsin OS=Homo sapiens OX=9606 GN=SERPINA3 PE=1 SV=2	FUNCTION: Although its physiological function is unclear, it can inhibit neutrophil cathepsin G and mast cell chymase, both of which can convert angiotensin-1 to the active angiotensin-2. {ECO:0000269|PubMed:2404007}.	SUBCELLULAR LOCATION: Secreted.		acute-phase response [GO:0006953]; inflammatory response [GO:0006954]; maintenance of gastrointestinal epithelium [GO:0030277]; negative regulation of endopeptidase activity [GO:0010951]; regulation of lipid metabolic process [GO:0019216]	DNA binding [GO:0003677]; serine-type endopeptidase inhibitor activity [GO:0004867]	azurophil granule lumen [GO:0035578]; blood microparticle [GO:0072562]; collagen-containing extracellular matrix [GO:0062023]; extracellular exosome [GO:0070062]; extracellular region [GO:0005576]; extracellular space [GO:0005615]; nucleus [GO:0005634]; platelet alpha granule lumen [GO:0031093]; secretory granule lumen [GO:0034774]	GO:0003677; GO:0004867; GO:0005576; GO:0005615; GO:0005634; GO:0006953; GO:0006954; GO:0010951; GO:0019216; GO:0030277; GO:0031093; GO:0034774; GO:0035578; GO:0062023; GO:0070062; GO:0072562	18.5941	18.4737	18.1511	19.0981	18.5218	20.9061	20.5229	20.3841	19.5404	20.6039
CENPV_Q7Z7K6	-1.62768	-0.5344	-0.683417	-0.325102	-1.2099	1.17107	0.780714	0.617064	0.792346	1.0193	CENPV	Centromere protein V	Q7Z7K6	1.16718	1.31462e-05	0.00678873	-1.16718	sp|Q7Z7K6|CENPV_HUMAN Centromere protein V OS=Homo sapiens OX=9606 GN=CENPV PE=1 SV=1	FUNCTION: Required for distribution of pericentromeric heterochromatin in interphase nuclei and for centromere formation and organization, chromosome alignment and cytokinesis. {ECO:0000269|PubMed:18772885}.	SUBCELLULAR LOCATION: Chromosome, centromere, kinetochore {ECO:0000269|PubMed:18772885}. Nucleus {ECO:0000269|PubMed:12196509}. Cytoplasm, cytoskeleton, spindle {ECO:0000269|PubMed:18772885}. Note=Enriched at the nuclear periphery and around the nucleolus (PubMed:12196509). In mitotic cells, localizes to kinetochores from prometaphase to metaphase (PubMed:18772885). At anaphase onset, transfers t…		ameboidal-type cell migration [GO:0001667]; cell cycle [GO:0007049]; cell division [GO:0051301]; centromere complex assembly [GO:0034508]; pericentric heterochromatin assembly [GO:0031508]; positive regulation of cytokinesis [GO:0032467]; regulation of chromosome organization [GO:0033044]	carbon-sulfur lyase activity [GO:0016846]; metal ion binding [GO:0046872]	cytosol [GO:0005829]; kinetochore [GO:0000776]; microtubule cytoskeleton [GO:0015630]; midbody [GO:0030496]; nuclear membrane [GO:0031965]; nucleoplasm [GO:0005654]; nucleus [GO:0005634]; spindle midzone [GO:0051233]	GO:0000776; GO:0001667; GO:0005634; GO:0005654; GO:0005829; GO:0007049; GO:0015630; GO:0016846; GO:0030496; GO:0031508; GO:0031965; GO:0032467; GO:0033044; GO:0034508; GO:0046872; GO:0051233; GO:0051301	15.6335	16.3618	16.2625	16.5012	15.9118	17.4978	17.2378	17.1288	17.2455	17.3967
HBD_P02042	0.859196	0.680265	0.902772	1.01573	0.90721	-1.46219	-1.12943	-1.00795	-0.8337	0.0681061	HBD	Hemoglobin subunit delta	P02042	1.44065	1.36832e-05	0.00678873	1.44065	sp|P02042|HBD_HUMAN Hemoglobin subunit delta OS=Homo sapiens OX=9606 GN=HBD PE=1 SV=2	FUNCTION: Involved in oxygen transport from the lung to the various peripheral tissues.			carbon dioxide transport [GO:0015670]; cellular oxidant detoxification [GO:0098869]; hydrogen peroxide catabolic process [GO:0042744]; oxygen transport [GO:0015671]; positive regulation of cell death [GO:0010942]	heme binding [GO:0020037]; hemoglobin alpha binding [GO:0031721]; metal ion binding [GO:0046872]; organic acid binding [GO:0043177]; oxygen binding [GO:0019825]; oxygen carrier activity [GO:0005344]	blood microparticle [GO:0072562]; cytosol [GO:0005829]; haptoglobin-hemoglobin complex [GO:0031838]; hemoglobin complex [GO:0005833]	GO:0005344; GO:0005829; GO:0005833; GO:0010942; GO:0015670; GO:0015671; GO:0019825; GO:0020037; GO:0031721; GO:0031838; GO:0042744; GO:0043177; GO:0046872; GO:0072562; GO:0098869	18.5424	18.3948	18.5784	18.6716	18.582	16.6271	16.9016	17.0019	17.1457	17.8897
MGST1_P10620	-0.949252	-0.74323	-1.11095	-0.649911	-0.917521	1.00535	0.159011	0.93097	0.610337	1.66519	MGST1	Microsomal glutathione S-transferase 1	P10620	1.26325	1.39126e-05	0.00678873	-1.26325	sp|P10620|MGST1_HUMAN Microsomal glutathione S-transferase 1 OS=Homo sapiens OX=9606 GN=MGST1 PE=1 SV=1	FUNCTION: Conjugation of reduced glutathione to a wide number of exogenous and endogenous hydrophobic electrophiles. Has a wide substrate specificity.	SUBCELLULAR LOCATION: Microsome {ECO:0000250}. Mitochondrion outer membrane {ECO:0000250}; Peripheral membrane protein {ECO:0000250}. Endoplasmic reticulum membrane {ECO:0000250}; Multi-pass membrane protein {ECO:0000250}.		cellular response to lipid hydroperoxide [GO:0071449]; glutathione transport [GO:0034635]	glutathione peroxidase activity [GO:0004602]; glutathione transferase activity [GO:0004364]	azurophil granule membrane [GO:0035577]; endoplasmic reticulum [GO:0005783]; endoplasmic reticulum membrane [GO:0005789]; integral component of membrane [GO:0016021]; mitochondrial outer membrane [GO:0005741]; mitochondrion [GO:0005739]; peroxisomal membrane [GO:0005778]; plasma membrane [GO:0005886]	GO:0004364; GO:0004602; GO:0005739; GO:0005741; GO:0005778; GO:0005783; GO:0005789; GO:0005886; GO:0016021; GO:0034635; GO:0035577; GO:0071449	13.9953	14.1441	13.8784	14.2115	14.0182	15.4075	14.796	15.3538	15.1221	15.8843
ORM1_P02763	-1.00473	-0.986532	-1.15462	-0.207363	-0.994746	0.63916	0.890384	0.850919	0.355013	1.61251	ORM1	Alpha-1-acid glycoprotein 1	P02763	2.01232	1.47651e-05	0.00678873	-2.01232	sp|P02763|A1AG1_HUMAN Alpha-1-acid glycoprotein 1 OS=Homo sapiens OX=9606 GN=ORM1 PE=1 SV=2	FUNCTION: Functions as transport protein in the blood stream. Binds various ligands in the interior of its beta-barrel domain. Also binds synthetic drugs and influences their distribution and availability in the body. Appears to function in modulating the activity of the immune system during the acute-phase reaction. {ECO:0000269|PubMed:17008009, ECO:0000269|PubMed:17321687}.	SUBCELLULAR LOCATION: Secreted.		acute-phase response [GO:0006953]; inflammatory response [GO:0006954]; negative regulation of interleukin-6 production [GO:0032715]; negative regulation of tumor necrosis factor production [GO:0032720]; positive regulation of interleukin-1 beta production [GO:0032731]; positive regulation of interleukin-1 production [GO:0032732]; positive regulation of tumor necrosis factor production [GO:0032760…		blood microparticle [GO:0072562]; collagen-containing extracellular matrix [GO:0062023]; extracellular exosome [GO:0070062]; extracellular region [GO:0005576]; extracellular space [GO:0005615]; platelet alpha granule lumen [GO:0031093]; specific granule lumen [GO:0035580]; tertiary granule lumen [GO:1904724]	GO:0002682; GO:0005576; GO:0005615; GO:0006953; GO:0006954; GO:0031093; GO:0032715; GO:0032720; GO:0032731; GO:0032732; GO:0032760; GO:0035580; GO:0062023; GO:0070062; GO:0072562; GO:1904724	17.3585	17.3796	17.1851	18.2811	17.3701	19.2606	19.5513	19.5056	18.9318	20.3868
LYVE1_Q9Y5Y7	-1.22253	-0.858942	-0.829058	-0.56188	-0.882898	1.14118	-0.0830299	1.27184	0.951895	1.07342	LYVE1	Lymphatic vessel endothelial hyaluronic acid receptor 1	Q9Y5Y7	1.27391	1.67984e-05	0.00678873	-1.27391	sp|Q9Y5Y7|LYVE1_HUMAN Lymphatic vessel endothelial hyaluronic acid receptor 1 OS=Homo sapiens OX=9606 GN=LYVE1 PE=1 SV=2	FUNCTION: Ligand-specific transporter trafficking between intracellular organelles (TGN) and the plasma membrane. Plays a role in autocrine regulation of cell growth mediated by growth regulators containing cell surface retention sequence binding (CRS). May act as a hyaluronan (HA) transporter, either mediating its uptake for catabolism within lymphatic endothelial cells themselves, or its transp…	SUBCELLULAR LOCATION: Cell membrane {ECO:0000269|PubMed:10037799, ECO:0000269|PubMed:26823460}; Single-pass type I membrane protein {ECO:0000269|PubMed:10037799}. Note=Localized to the plasma membrane and in vesicles near extranuclear membranes which may represent trans-Golgi network (TGN) and endosomes/prelysosomeal compartments. Undergoes ligand-dependent internalization and recycling at the ce…		anatomical structure morphogenesis [GO:0009653]; cell-matrix adhesion [GO:0007160]; glycosaminoglycan catabolic process [GO:0006027]; positive regulation of cellular extravasation [GO:0002693]; response to wounding [GO:0009611]	hyaluronic acid binding [GO:0005540]; signaling receptor activity [GO:0038023]; transmembrane signaling receptor activity [GO:0004888]	extracellular exosome [GO:0070062]; integral component of plasma membrane [GO:0005887]; membrane [GO:0016020]; plasma membrane [GO:0005886]	GO:0002693; GO:0004888; GO:0005540; GO:0005886; GO:0005887; GO:0006027; GO:0007160; GO:0009611; GO:0009653; GO:0016020; GO:0038023; GO:0070062	15.6864	15.9523	15.9742	16.1695	15.9348	17.4149	16.5197	17.5104	17.2765	17.3653
UNG_P13051	0.988597	1.54625	0.569169	0.945931	0.44013	-0.829782	-0.789413	-1.12354	-1.11729	-0.630053	UNG	Uracil-DNA glycosylase	P13051	0.548537	1.69433e-05	0.00678873	0.548537	sp|P13051|UNG_HUMAN Uracil-DNA glycosylase OS=Homo sapiens OX=9606 GN=UNG PE=1 SV=2	FUNCTION: Excises uracil residues from the DNA which can arise as a result of misincorporation of dUMP residues by DNA polymerase or due to deamination of cytosine.	SUBCELLULAR LOCATION: [Isoform 1]: Mitochondrion.; SUBCELLULAR LOCATION: [Isoform 2]: Nucleus.	DISEASE: Immunodeficiency with hyper-IgM 5 (HIGM5) [MIM:608106]: A rare immunodeficiency syndrome characterized by normal or elevated serum IgM levels with absence of IgG, IgA, and IgE. It results in a profound susceptibility to bacterial infections. {ECO:0000269|PubMed:12958596, ECO:0000269|PubMed:15967827}. Note=The disease is caused by variants affecting the gene represented in this entry.	base-excision repair [GO:0006284]; base-excision repair, AP site formation via deaminated base removal [GO:0097510]; depyrimidination [GO:0045008]; DNA repair [GO:0006281]; isotype switching [GO:0045190]; negative regulation of apoptotic process [GO:0043066]; somatic hypermutation of immunoglobulin genes [GO:0016446]	damaged DNA binding [GO:0003684]; ribosomal small subunit binding [GO:0043024]; uracil DNA N-glycosylase activity [GO:0004844]	mitochondrion [GO:0005739]; nucleoplasm [GO:0005654]; nucleus [GO:0005634]	GO:0003684; GO:0004844; GO:0005634; GO:0005654; GO:0005739; GO:0006281; GO:0006284; GO:0016446; GO:0043024; GO:0043066; GO:0045008; GO:0045190; GO:0097510	15.7617	15.9321	15.6336	15.7487	15.5942	15.2064	15.2187	15.1167	15.1186	15.2674
VSIG4_Q9Y279	-0.91178	-0.689826	-1.05756	-0.770233	-0.909997	0.77109	0.234963	1.40765	0.385094	1.5406	VSIG4	V-set and immunoglobulin domain-containing protein 4	Q9Y279	1.50978	1.84029e-05	0.00678873	-1.50978	sp|Q9Y279|VSIG4_HUMAN V-set and immunoglobulin domain-containing protein 4 OS=Homo sapiens OX=9606 GN=VSIG4 PE=1 SV=1	FUNCTION: Phagocytic receptor, strong negative regulator of T-cell proliferation and IL2 production. Potent inhibitor of the alternative complement pathway convertases. {ECO:0000269|PubMed:17016562, ECO:0000269|PubMed:17051150}.	SUBCELLULAR LOCATION: Membrane {ECO:0000305}; Single-pass type I membrane protein {ECO:0000305}.		complement activation, alternative pathway [GO:0006957]; negative regulation of complement activation, alternative pathway [GO:0045957]; negative regulation of interleukin-2 production [GO:0032703]; negative regulation of macrophage activation [GO:0043031]; negative regulation of T cell proliferation [GO:0042130]	complement component C3b binding [GO:0001851]	integral component of membrane [GO:0016021]; protein-containing complex [GO:0032991]	GO:0001851; GO:0006957; GO:0016021; GO:0032703; GO:0032991; GO:0042130; GO:0043031; GO:0045957	14.6108	14.8039	14.484	14.7339	14.6124	16.0746	15.6083	16.6283	15.7389	16.7439
HSPA2_P54652	1.47775	0.75076	0.927318	-0.0548526	1.22864	-1.05418	-0.696827	-1.07002	-0.739726	-0.768853	HSPA2	Heat shock-related 70 kDa protein 2	P54652	1.73945	1.94762e-05	0.00678873	1.73945	sp|P54652|HSP72_HUMAN Heat shock-related 70 kDa protein 2 OS=Homo sapiens OX=9606 GN=HSPA2 PE=1 SV=1	FUNCTION: Molecular chaperone implicated in a wide variety of cellular processes, including protection of the proteome from stress, folding and transport of newly synthesized polypeptides, activation of proteolysis of misfolded proteins and the formation and dissociation of protein complexes. Plays a pivotal role in the protein quality control system, ensuring the correct folding of proteins, the…	SUBCELLULAR LOCATION: Cytoplasm, cytoskeleton, spindle {ECO:0000250|UniProtKB:P17156}. Note=Colocalizes with SHCBP1L at spindle during the meiosis process. {ECO:0000250|UniProtKB:P17156}.		cellular response to unfolded protein [GO:0034620]; chaperone cofactor-dependent protein refolding [GO:0051085]; male meiosis I [GO:0007141]; male meiotic nuclear division [GO:0007140]; negative regulation of inclusion body assembly [GO:0090084]; positive regulation of ATPase-coupled calcium transmembrane transporter activity [GO:1901896]; positive regulation of G2/M transition of mitotic cell cy…	ATP binding [GO:0005524]; ATP hydrolysis activity [GO:0016887]; ATP-dependent protein folding chaperone [GO:0140662]; chaperone binding [GO:0051087]; disordered domain specific binding [GO:0097718]; enzyme binding [GO:0019899]; glycolipid binding [GO:0051861]; heat shock protein binding [GO:0031072]; misfolded protein binding [GO:0051787]; protein folding chaperone [GO:0044183]; tau protein bindi…	blood microparticle [GO:0072562]; CatSper complex [GO:0036128]; cell surface [GO:0009986]; cytoplasm [GO:0005737]; cytosol [GO:0005829]; extracellular exosome [GO:0070062]; male germ cell nucleus [GO:0001673]; meiotic spindle [GO:0072687]; membrane [GO:0016020]; nucleus [GO:0005634]; plasma membrane [GO:0005886]; synaptonemal complex [GO:0000795]	GO:0000795; GO:0001673; GO:0001934; GO:0005524; GO:0005634; GO:0005737; GO:0005829; GO:0005886; GO:0006986; GO:0007140; GO:0007141; GO:0007283; GO:0007286; GO:0009408; GO:0009409; GO:0009986; GO:0010971; GO:0016020; GO:0016192; GO:0016887; GO:0019899; GO:0031072; GO:0034620; GO:0036128; GO:0042026; GO:0044183; GO:0048156; GO:0051082; GO:0051085; GO:0051087; GO:0051787; GO:0051861; GO:0070062; GO:…	21.6444	20.9142	21.0915	20.105	21.3942	19.1013	19.4602	19.0854	19.4171	19.3879
MRM1_Q6IN84	0.0137545	1.30165	1.08689	0.925534	1.08896	-1.18579	-1.02911	-0.751769	-0.726996	-0.723125	MRM1	rRNA methyltransferase 1, mitochondrial	Q6IN84	0.66859	2.0666e-05	0.00678873	0.66859	sp|Q6IN84|MRM1_HUMAN rRNA methyltransferase 1, mitochondrial OS=Homo sapiens OX=9606 GN=MRM1 PE=1 SV=1	FUNCTION: S-adenosyl-L-methionine-dependent 2'-O-ribose methyltransferase that catalyzes the formation of 2'-O-methylguanosine at position 1145 (Gm1145) in the 16S mitochondrial large subunit ribosomal RNA (mtLSU rRNA), a universally conserved modification in the peptidyl transferase domain of the mtLSU rRNA. {ECO:0000269|PubMed:25074936}.	SUBCELLULAR LOCATION: Mitochondrion {ECO:0000269|PubMed:24036117, ECO:0000269|PubMed:25009282}.		rRNA 2'-O-methylation [GO:0000451]; rRNA modification [GO:0000154]	RNA binding [GO:0003723]; rRNA (guanine) methyltransferase activity [GO:0016435]; rRNA (guanosine-2'-O-)-methyltransferase activity [GO:0070039]	mitochondrial matrix [GO:0005759]; mitochondrion [GO:0005739]	GO:0000154; GO:0000451; GO:0003723; GO:0005739; GO:0005759; GO:0016435; GO:0070039	14.2834	14.7708	14.6895	14.6285	14.6903	13.8295	13.8888	13.9937	14.0031	14.0046
ENO3_P13929	-0.501541	-1.2063	-1.09627	-0.739223	-0.848444	1.14402	0.106481	1.18519	0.672028	1.28405	ENO3	Beta-enolase	P13929	0.753635	2.1008e-05	0.00678873	-0.753635	sp|P13929|ENOB_HUMAN Beta-enolase OS=Homo sapiens OX=9606 GN=ENO3 PE=1 SV=5	FUNCTION: Glycolytic enzyme that catalyzes the conversion of 2-phosphoglycerate to phosphoenolpyruvate. Appears to have a function in striated muscle development and regeneration. {ECO:0000250|UniProtKB:P15429}.	SUBCELLULAR LOCATION: Cytoplasm. Note=Localized to the Z line. Some colocalization with CKM at M-band (By similarity). {ECO:0000250}.	DISEASE: Glycogen storage disease 13 (GSD13) [MIM:612932]: A metabolic disorder that results in exercise-induced myalgias, generalized muscle weakness and fatigability. It is characterized by increased serum creatine kinase and decreased enolase 3 activity. Dramatically reduced protein levels with focal sarcoplasmic accumulation of glycogen-beta particles are detected on ultrastructural analysis.…	canonical glycolysis [GO:0061621]; glycolytic process [GO:0006096]	magnesium ion binding [GO:0000287]; phosphopyruvate hydratase activity [GO:0004634]	cytosol [GO:0005829]; extracellular exosome [GO:0070062]; extracellular space [GO:0005615]; membrane [GO:0016020]; phosphopyruvate hydratase complex [GO:0000015]; plasma membrane [GO:0005886]	GO:0000015; GO:0000287; GO:0004634; GO:0005615; GO:0005829; GO:0005886; GO:0006096; GO:0016020; GO:0061621; GO:0070062	21.123	20.8207	20.8679	21.0211	20.9742	21.829	21.3839	21.8467	21.6265	21.8891
CLASP2_O75122	-0.523195	-0.916266	-0.42696	-1.32763	-1.27892	0.736042	0.52065	1.12199	1.19117	0.90312	CLASP2	CLIP-associating protein 2	O75122	0.500778	2.91542e-05	0.00897255	-0.500778	sp|O75122|CLAP2_HUMAN CLIP-associating protein 2 OS=Homo sapiens OX=9606 GN=CLASP2 PE=1 SV=3	FUNCTION: Microtubule plus-end tracking protein that promotes the stabilization of dynamic microtubules (PubMed:26003921). Involved in the nucleation of noncentrosomal microtubules originating from the trans-Golgi network (TGN). Required for the polarization of the cytoplasmic microtubule arrays in migrating cells towards the leading edge of the cell. May act at the cell cortex to enhance the fre…	SUBCELLULAR LOCATION: Cytoplasm, cytoskeleton {ECO:0000269|PubMed:15631994, ECO:0000269|PubMed:20937854}. Cytoplasm, cytoskeleton, microtubule organizing center, centrosome {ECO:0000269|PubMed:16914514}. Chromosome, centromere, kinetochore {ECO:0000269|PubMed:16866869, ECO:0000269|PubMed:16914514}. Cytoplasm, cytoskeleton, spindle {ECO:0000269|PubMed:16866869, ECO:0000269|PubMed:16914514}. Golgi …		cell division [GO:0051301]; establishment of mitotic spindle localization [GO:0040001]; establishment or maintenance of cell polarity [GO:0007163]; exit from mitosis [GO:0010458]; Golgi organization [GO:0007030]; microtubule anchoring [GO:0034453]; microtubule cytoskeleton organization [GO:0000226]; microtubule nucleation [GO:0007020]; microtubule organizing center organization [GO:0031023]; mito…	actin filament binding [GO:0051015]; dystroglycan binding [GO:0002162]; microtubule binding [GO:0008017]; microtubule plus-end binding [GO:0051010]; protein tyrosine kinase binding [GO:1990782]	axonal growth cone [GO:0044295]; basal cortex [GO:0045180]; cell cortex [GO:0005938]; cell leading edge [GO:0031252]; cortical microtubule plus-end [GO:1903754]; cytoplasm [GO:0005737]; cytoplasmic microtubule [GO:0005881]; cytosol [GO:0005829]; Golgi apparatus [GO:0005794]; kinetochore [GO:0000776]; kinetochore microtubule [GO:0005828]; membrane [GO:0016020]; microtubule [GO:0005874]; microtubul…	GO:0000226; GO:0000776; GO:0002162; GO:0005737; GO:0005794; GO:0005802; GO:0005815; GO:0005828; GO:0005829; GO:0005874; GO:0005876; GO:0005881; GO:0005886; GO:0005938; GO:0006903; GO:0007020; GO:0007026; GO:0007030; GO:0007052; GO:0007163; GO:0008017; GO:0010458; GO:0010470; GO:0010634; GO:0010717; GO:0016020; GO:0030516; GO:0031023; GO:0031110; GO:0031113; GO:0031252; GO:0032587; GO:0032886; GO:…	19.3198	19.2098	19.3467	19.0946	19.1083	19.6722	19.6119	19.7803	19.7996	19.719
ADAMTSL3_P82987	1.32798	1.33013	0.417589	0.342649	0.86519	-0.721964	-1.01452	-1.45109	-0.839682	-0.256279	ADAMTSL3	ADAMTS-like protein 3	P82987	1.51512	3.4731e-05	0.010203	1.51512	sp|P82987|ATL3_HUMAN ADAMTS-like protein 3 OS=Homo sapiens OX=9606 GN=ADAMTSL3 PE=1 SV=4		SUBCELLULAR LOCATION: Secreted, extracellular space, extracellular matrix {ECO:0000269|PubMed:14667842}.		extracellular matrix organization [GO:0030198]		extracellular matrix [GO:0031012]; extracellular region [GO:0005576]; intracellular membrane-bounded organelle [GO:0043231]	GO:0005576; GO:0030198; GO:0031012; GO:0043231	14.9885	14.9904	14.1834	14.1172	14.5792	13.1758	12.9171	12.531	13.0717	13.5876
SEMA4B_Q9NPR2	-1.26692	-0.710856	-1.34669	-0.0136283	-0.962909	1.28028	0.342781	0.902022	0.914738	0.861182	SEMA4B	Semaphorin-4B	Q9NPR2	0.946043	4.00886e-05	0.0112649	-0.946043	sp|Q9NPR2|SEM4B_HUMAN Semaphorin-4B OS=Homo sapiens OX=9606 GN=SEMA4B PE=1 SV=4	FUNCTION: Inhibits axonal extension by providing local signals to specify territories inaccessible for growing axons. {ECO:0000250}.	SUBCELLULAR LOCATION: Membrane; Single-pass type I membrane protein.		axon guidance [GO:0007411]; negative chemotaxis [GO:0050919]; negative regulation of axon extension involved in axon guidance [GO:0048843]; neural crest cell migration [GO:0001755]; positive regulation of cell migration [GO:0030335]; semaphorin-plexin signaling pathway [GO:0071526]	chemorepellent activity [GO:0045499]; semaphorin receptor binding [GO:0030215]	extracellular space [GO:0005615]; integral component of plasma membrane [GO:0005887]; synapse [GO:0045202]	GO:0001755; GO:0005615; GO:0005887; GO:0007411; GO:0030215; GO:0030335; GO:0045202; GO:0045499; GO:0048843; GO:0050919; GO:0071526	14.0668	14.3726	14.0229	14.756	14.234	15.4675	14.952	15.2595	15.2665	15.237
IGF1R_P08069	0.684236	1.16417	1.3588	0.122649	1.04251	-1.17913	-0.482027	-0.709156	-0.778969	-1.22308	IGF1R	Insulin-like growth factor 1 receptor;Insulin-like growth factor 1 receptor alpha chain;Insulin-like growth factor 1 receptor beta chain	P08069	0.596284	4.36479e-05	0.0115288	0.596284	sp|P08069|IGF1R_HUMAN Insulin-like growth factor 1 receptor OS=Homo sapiens OX=9606 GN=IGF1R PE=1 SV=1	FUNCTION: Receptor tyrosine kinase which mediates actions of insulin-like growth factor 1 (IGF1). Binds IGF1 with high affinity and IGF2 and insulin (INS) with a lower affinity. The activated IGF1R is involved in cell growth and survival control. IGF1R is crucial for tumor transformation and survival of malignant cell. Ligand binding activates the receptor kinase, leading to receptor autophosphor…	SUBCELLULAR LOCATION: Cell membrane {ECO:0000269|PubMed:17524361}; Single-pass type I membrane protein {ECO:0000269|PubMed:17524361}.	DISEASE: Insulin-like growth factor 1 resistance (IGF1RES) [MIM:270450]: A disorder characterized by intrauterine growth retardation, poor postnatal growth and increased plasma IGF1 levels. {ECO:0000269|PubMed:14657428, ECO:0000269|PubMed:15928254, ECO:0000269|PubMed:25040157}. Note=The disease is caused by variants affecting the gene represented in this entry.	aging [GO:0007568]; amyloid-beta clearance [GO:0097242]; axonogenesis [GO:0007409]; cardiac atrium development [GO:0003230]; cellular response to aldosterone [GO:1904045]; cellular response to amyloid-beta [GO:1904646]; cellular response to angiotensin [GO:1904385]; cellular response to dexamethasone stimulus [GO:0071549]; cellular response to estradiol stimulus [GO:0071392]; cellular response to…	ATP binding [GO:0005524]; G-protein alpha-subunit binding [GO:0001965]; identical protein binding [GO:0042802]; insulin binding [GO:0043559]; insulin receptor activity [GO:0005009]; insulin receptor binding [GO:0005158]; insulin receptor substrate binding [GO:0043560]; insulin-like growth factor binding [GO:0005520]; insulin-like growth factor I binding [GO:0031994]; insulin-like growth factor re…	alphav-beta3 integrin-IGF-1-IGF1R complex [GO:0035867]; axon [GO:0030424]; caveola [GO:0005901]; cytoplasm [GO:0005737]; insulin receptor complex [GO:0005899]; integral component of plasma membrane [GO:0005887]; intracellular membrane-bounded organelle [GO:0043231]; membrane [GO:0016020]; neuronal cell body [GO:0043025]; nucleus [GO:0005634]; plasma membrane [GO:0005886]; protein kinase complex […	GO:0001965; GO:0003230; GO:0004713; GO:0004714; GO:0005009; GO:0005010; GO:0005158; GO:0005198; GO:0005520; GO:0005524; GO:0005634; GO:0005737; GO:0005886; GO:0005887; GO:0005899; GO:0005901; GO:0006955; GO:0007165; GO:0007169; GO:0007409; GO:0007568; GO:0008284; GO:0008286; GO:0010656; GO:0014065; GO:0014068; GO:0016020; GO:0021549; GO:0021766; GO:0030010; GO:0030315; GO:0030335; GO:0030424; GO:…	15.1185	15.2821	15.3485	14.9271	15.2407	14.4832	14.7209	14.6435	14.6197	14.4682
SYNPO2L_Q9H987	1.26983	0.854129	1.07906	-0.0463952	1.18268	-1.02401	-1.05456	-0.673856	-0.462634	-1.12424	SYNPO2L	Synaptopodin 2-like protein	Q9H987	0.679091	4.45956e-05	0.0115288	0.679091	sp|Q9H987|SYP2L_HUMAN Synaptopodin 2-like protein OS=Homo sapiens OX=9606 GN=SYNPO2L PE=1 SV=3	FUNCTION: Actin-associated protein that may play a role in modulating actin-based shape. {ECO:0000250}.	SUBCELLULAR LOCATION: Cytoplasm, cytoskeleton {ECO:0000250}.		heart morphogenesis [GO:0003007]; positive regulation of actin filament bundle assembly [GO:0032233]; positive regulation of Rho protein signal transduction [GO:0035025]; positive regulation of stress fiber assembly [GO:0051496]; sarcomere organization [GO:0045214]	actin binding [GO:0003779]	actin cytoskeleton [GO:0015629]; cell junction [GO:0030054]; cytosol [GO:0005829]; nuclear speck [GO:0016607]; nucleoplasm [GO:0005654]; nucleus [GO:0005634]; Z disc [GO:0030018]	GO:0003007; GO:0003779; GO:0005634; GO:0005654; GO:0005829; GO:0015629; GO:0016607; GO:0030018; GO:0030054; GO:0032233; GO:0035025; GO:0045214; GO:0051496	20.1149	19.9522	20.0402	19.5999	20.0808	19.2174	19.2054	19.3544	19.437	19.1782
HEG1_Q9ULI3	1.11632	1.53262	0.943024	-0.0738002	0.8211	-1.01043	-0.944095	-0.658251	-0.861325	-0.865158	HEG1	Protein HEG homolog 1	Q9ULI3	0.641561	5.016e-05	0.0118236	0.641561	sp|Q9ULI3|HEG1_HUMAN Protein HEG homolog 1 OS=Homo sapiens OX=9606 GN=HEG1 PE=1 SV=3	FUNCTION: Receptor component of the CCM signaling pathway which is a crucial regulator of heart and vessel formation and integrity. May act through the stabilization of endothelial cell junctions. {ECO:0000250}.	SUBCELLULAR LOCATION: [Isoform 1]: Cell membrane {ECO:0000305}; Single-pass type I membrane protein {ECO:0000305}. Cell junction {ECO:0000250}.; SUBCELLULAR LOCATION: [Isoform 2]: Secreted {ECO:0000305}.		cardiac atrium morphogenesis [GO:0003209]; cardiac muscle tissue growth [GO:0055017]; cell-cell junction assembly [GO:0007043]; endothelial cell morphogenesis [GO:0001886]; heart development [GO:0007507]; in utero embryonic development [GO:0001701]; lung development [GO:0030324]; lymph circulation [GO:0003017]; lymph vessel development [GO:0001945]; multicellular organism growth [GO:0035264]; neg…	calcium ion binding [GO:0005509]	cell-cell junction [GO:0005911]; external side of plasma membrane [GO:0009897]; extracellular region [GO:0005576]; integral component of membrane [GO:0016021]	GO:0001570; GO:0001701; GO:0001886; GO:0001945; GO:0003017; GO:0003209; GO:0003222; GO:0003281; GO:0005509; GO:0005576; GO:0005911; GO:0007043; GO:0007507; GO:0009791; GO:0009897; GO:0016021; GO:0030324; GO:0035024; GO:0035264; GO:0048845; GO:0050878; GO:0055017; GO:0060039; GO:0090271; GO:1902414; GO:1905709; GO:2000299	14.3615	14.5153	14.2974	13.9216	14.2523	13.5754	13.5999	13.7055	13.6305	13.6291
HPRT1_P00492	0.87067	0.913063	1.12375	0.927218	0.765766	-1.06284	-0.552797	-1.24959	-0.553684	-1.18155	HPRT1	Hypoxanthine-guanine phosphoribosyltransferase	P00492	0.363066	5.23045e-05	0.0118236	0.363066	sp|P00492|HPRT_HUMAN Hypoxanthine-guanine phosphoribosyltransferase OS=Homo sapiens OX=9606 GN=HPRT1 PE=1 SV=2	FUNCTION: Converts guanine to guanosine monophosphate, and hypoxanthine to inosine monophosphate. Transfers the 5-phosphoribosyl group from 5-phosphoribosylpyrophosphate onto the purine. Plays a central role in the generation of purine nucleotides through the purine salvage pathway.	SUBCELLULAR LOCATION: Cytoplasm.	DISEASE: Lesch-Nyhan syndrome (LNS) [MIM:300322]: Characterized by complete lack of enzymatic activity that results in hyperuricemia, choreoathetosis, intellectual disability, and compulsive self-mutilation. {ECO:0000269|PubMed:15571223, ECO:0000269|PubMed:17027311, ECO:0000269|PubMed:20544509, ECO:0000269|PubMed:2071157, ECO:0000269|PubMed:2246854, ECO:0000269|PubMed:2347587, ECO:0000269|PubMed:…	adenine metabolic process [GO:0046083]; AMP salvage [GO:0044209]; central nervous system neuron development [GO:0021954]; cerebral cortex neuron differentiation [GO:0021895]; dendrite morphogenesis [GO:0048813]; dopamine metabolic process [GO:0042417]; dopaminergic neuron differentiation [GO:0071542]; GMP catabolic process [GO:0046038]; GMP salvage [GO:0032263]; grooming behavior [GO:0007625]; gu…	guanine phosphoribosyltransferase activity [GO:0052657]; hypoxanthine phosphoribosyltransferase activity [GO:0004422]; identical protein binding [GO:0042802]; magnesium ion binding [GO:0000287]; nucleotide binding [GO:0000166]	cytoplasm [GO:0005737]; cytosol [GO:0005829]; extracellular exosome [GO:0070062]	GO:0000166; GO:0000287; GO:0001913; GO:0001975; GO:0004422; GO:0005737; GO:0005829; GO:0006164; GO:0006166; GO:0006178; GO:0007625; GO:0007626; GO:0021756; GO:0021895; GO:0021954; GO:0032263; GO:0032264; GO:0042417; GO:0042802; GO:0043103; GO:0044209; GO:0045964; GO:0046038; GO:0046040; GO:0046083; GO:0046100; GO:0046651; GO:0048813; GO:0051289; GO:0052657; GO:0070062; GO:0071542	17.4011	17.4095	17.451	17.4122	17.3804	17.0196	17.1202	16.9828	17.1201	16.9962
IFI30_P13284	-0.896583	-0.609282	-0.910765	-0.309416	-1.52255	0.618194	1.26832	1.26763	0.108526	0.985931	IFI30	Gamma-interferon-inducible lysosomal thiol reductase	P13284	1.30952	5.31565e-05	0.0118236	-1.30952	sp|P13284|GILT_HUMAN Gamma-interferon-inducible lysosomal thiol reductase OS=Homo sapiens OX=9606 GN=IFI30 PE=1 SV=3	FUNCTION: Lysosomal thiol reductase that can reduce protein disulfide bonds. May facilitate the complete unfolding of proteins destined for lysosomal degradation. Plays an important role in antigen processing. Facilitates the generation of MHC class II-restricted epitodes from disulfide bond-containing antigen by the endocytic reduction of disulfide bonds (By similarity). Facilitates also MHC cla…	SUBCELLULAR LOCATION: Secreted {ECO:0000269|PubMed:10639150, ECO:0000269|PubMed:3136170}. Lysosome {ECO:0000269|PubMed:10639150, ECO:0000269|PubMed:3136170}.		antigen processing and presentation of exogenous peptide antigen via MHC class I [GO:0042590]; antigen processing and presentation of exogenous peptide antigen via MHC class II [GO:0019886]; negative regulation of fibroblast proliferation [GO:0048147]; protein stabilization [GO:0050821]	oxidoreductase activity [GO:0016491]; oxidoreductase activity, acting on a sulfur group of donors [GO:0016667]; oxidoreductase activity, acting on a sulfur group of donors, disulfide as acceptor [GO:0016671]	cell junction [GO:0030054]; cytosol [GO:0005829]; extracellular region [GO:0005576]; intracellular membrane-bounded organelle [GO:0043231]; lysosomal lumen [GO:0043202]; lysosome [GO:0005764]	GO:0005576; GO:0005764; GO:0005829; GO:0016491; GO:0016667; GO:0016671; GO:0019886; GO:0030054; GO:0042590; GO:0043202; GO:0043231; GO:0048147; GO:0050821	15.7197	15.9411	15.7088	16.1722	15.2374	16.8869	17.3879	17.3874	16.4942	17.1703
PPIL1_Q9Y3C6	-1.68224	-0.997352	-0.551435	-0.162541	-0.868977	0.408232	0.673256	1.25919	0.824107	1.09776	PPIL1	Peptidyl-prolyl cis-trans isomerase-like 1	Q9Y3C6	0.998518	5.5674e-05	0.0118236	-0.998518	sp|Q9Y3C6|PPIL1_HUMAN Peptidyl-prolyl cis-trans isomerase-like 1 OS=Homo sapiens OX=9606 GN=PPIL1 PE=1 SV=1	FUNCTION: Involved in pre-mRNA splicing as component of the spliceosome (PubMed:11991638, PubMed:28502770, PubMed:28076346, PubMed:33220177). PPIases accelerate the folding of proteins. Catalyzes the cis-trans isomerization of proline imidic peptide bonds in oligopeptides (PubMed:16595688). Catalyzes prolyl peptide bond isomerization in CDC40/PRP17 (PubMed:33220177). Plays an important role in em…	SUBCELLULAR LOCATION: Nucleus {ECO:0000269|PubMed:11991638, ECO:0000269|PubMed:28076346, ECO:0000269|PubMed:28502770}.	DISEASE: Pontocerebellar hypoplasia 14 (PCH14) [MIM:619301]: A form of pontocerebellar hypoplasia, a disorder characterized by structural defects of the pons and cerebellum, evident upon brain imaging. PCH14 is a severe autosomal recessive form characterized by progressive microcephaly, and poor or absent psychomotor development with severely impaired intellectual development apparent from birth.…	embryonic brain development [GO:1990403]; mRNA splicing, via spliceosome [GO:0000398]; protein folding [GO:0006457]; protein peptidyl-prolyl isomerization [GO:0000413]	cyclosporin A binding [GO:0016018]; disordered domain specific binding [GO:0097718]; peptidyl-prolyl cis-trans isomerase activity [GO:0003755]	catalytic step 2 spliceosome [GO:0071013]; nucleoplasm [GO:0005654]; nucleus [GO:0005634]; U2-type catalytic step 2 spliceosome [GO:0071007]	GO:0000398; GO:0000413; GO:0003755; GO:0005634; GO:0005654; GO:0006457; GO:0016018; GO:0071007; GO:0071013; GO:0097718; GO:1990403	16.3033	16.7044	16.9655	17.1933	16.7796	17.5276	17.6828	18.0259	17.7711	17.9314
PPBP_P02775	0.840729	1.64056	1.29091	0.0524387	0.410052	-1.21624	-0.816324	-0.729325	-0.770027	-0.702779	PPBP	Platelet basic protein;Connective tissue-activating peptide III;TC-2;Connective tissue-activating peptide III(1-81);Beta-thromboglobulin;Neutrophil-activating peptide 2(74);Neutrophil-activating peptide 2(73);Neutrophil-activating peptide 2;TC-1;Neutrophil-activating peptide 2(1-66);Neutrophil-activating peptide 2(1-63)	P02775	1.5769	5.63131e-05	0.0118236	1.5769	sp|P02775|CXCL7_HUMAN Platelet basic protein OS=Homo sapiens OX=9606 GN=PPBP PE=1 SV=3	FUNCTION: LA-PF4 stimulates DNA synthesis, mitosis, glycolysis, intracellular cAMP accumulation, prostaglandin E2 secretion, and synthesis of hyaluronic acid and sulfated glycosaminoglycan. It also stimulates the formation and secretion of plasminogen activator by human synovial cells. NAP-2 is a ligand for CXCR1 and CXCR2, and NAP-2, NAP-2(73), NAP-2(74), NAP-2(1-66), and most potent NAP-2(1-63)…	SUBCELLULAR LOCATION: Secreted.		antimicrobial humoral immune response mediated by antimicrobial peptide [GO:0061844]; cellular response to lipopolysaccharide [GO:0071222]; chemokine-mediated signaling pathway [GO:0070098]; defense response to bacterium [GO:0042742]; glucose transmembrane transport [GO:1904659]; inflammatory response [GO:0006954]; killing of cells of another organism [GO:0031640]; neutrophil chemotaxis [GO:00305…	chemokine activity [GO:0008009]; CXCR chemokine receptor binding [GO:0045236]; glucose transmembrane transporter activity [GO:0005355]; growth factor activity [GO:0008083]	extracellular region [GO:0005576]; extracellular space [GO:0005615]; platelet alpha granule [GO:0031091]; platelet alpha granule lumen [GO:0031093]; tertiary granule lumen [GO:1904724]	GO:0005355; GO:0005576; GO:0005615; GO:0006954; GO:0008009; GO:0008083; GO:0030593; GO:0031091; GO:0031093; GO:0031640; GO:0042742; GO:0045236; GO:0051781; GO:0061844; GO:0070098; GO:0071222; GO:1904659; GO:1904724	16.3499	17.0945	16.769	15.6161	15.949	14.435	14.8073	14.8883	14.8504	14.913
HBB_P68871	0.606031	0.503127	1.13116	1.02287	0.970086	-1.56268	-0.788962	-1.10093	-0.905874	0.125155	HBB	Hemoglobin subunit beta;LVV-hemorphin-7;Spinorphin	P68871	1.60853	5.67125e-05	0.0118236	1.60853	sp|P68871|HBB_HUMAN Hemoglobin subunit beta OS=Homo sapiens OX=9606 GN=HBB PE=1 SV=2	FUNCTION: Involved in oxygen transport from the lung to the various peripheral tissues. {ECO:0000269|PubMed:28066926}.; FUNCTION: LVV-hemorphin-7 potentiates the activity of bradykinin, causing a decrease in blood pressure.; FUNCTION: [Spinorphin]: Functions as an endogenous inhibitor of enkephalin-degrading enzymes such as DPP3, and as a selective antagonist of the P2RX3 receptor which is involv…		DISEASE: Heinz body anemias (HEIBAN) [MIM:140700]: Form of non-spherocytic hemolytic anemia of Dacie type 1. After splenectomy, which has little benefit, basophilic inclusions called Heinz bodies are demonstrable in the erythrocytes. Before splenectomy, diffuse or punctate basophilia may be evident. Most of these cases are probably instances of hemoglobinopathy. The hemoglobin demonstrates heat l…	carbon dioxide transport [GO:0015670]; cellular oxidant detoxification [GO:0098869]; hydrogen peroxide catabolic process [GO:0042744]; nitric oxide transport [GO:0030185]; oxygen transport [GO:0015671]; platelet aggregation [GO:0070527]; positive regulation of cell death [GO:0010942]; positive regulation of nitric oxide biosynthetic process [GO:0045429]; regulation of blood pressure [GO:0008217];…	heme binding [GO:0020037]; hemoglobin alpha binding [GO:0031721]; hemoglobin binding [GO:0030492]; metal ion binding [GO:0046872]; organic acid binding [GO:0043177]; oxygen binding [GO:0019825]; oxygen carrier activity [GO:0005344]	blood microparticle [GO:0072562]; cytosol [GO:0005829]; endocytic vesicle lumen [GO:0071682]; extracellular exosome [GO:0070062]; extracellular region [GO:0005576]; extracellular space [GO:0005615]; ficolin-1-rich granule lumen [GO:1904813]; haptoglobin-hemoglobin complex [GO:0031838]; hemoglobin complex [GO:0005833]; tertiary granule lumen [GO:1904724]	GO:0005344; GO:0005576; GO:0005615; GO:0005829; GO:0005833; GO:0008217; GO:0010942; GO:0015670; GO:0015671; GO:0019825; GO:0020037; GO:0030185; GO:0030492; GO:0031721; GO:0031838; GO:0042542; GO:0042744; GO:0043177; GO:0045429; GO:0046872; GO:0070062; GO:0070293; GO:0070527; GO:0071682; GO:0072562; GO:0098869; GO:1904724; GO:1904813	21.7353	21.6375	22.2341	22.1313	22.0811	19.6752	20.4101	20.1138	20.2991	21.2785
HBA1_P69905	0.800013	0.497267	1.27454	0.774219	0.86841	-1.67998	-0.777144	-0.985497	-0.85461	0.0827784	HBA1	Hemoglobin subunit alpha	P69905	2.14469	6.33369e-05	0.0126475	2.14469	sp|P69905|HBA_HUMAN Hemoglobin subunit alpha OS=Homo sapiens OX=9606 GN=HBA1 PE=1 SV=2	FUNCTION: Involved in oxygen transport from the lung to the various peripheral tissues.; FUNCTION: [Hemopressin]: Hemopressin acts as an antagonist peptide of the cannabinoid receptor CNR1 (PubMed:18077343). Hemopressin-binding efficiently blocks cannabinoid receptor CNR1 and subsequent signaling (PubMed:18077343). {ECO:0000269|PubMed:18077343}.		DISEASE: Heinz body anemias (HEIBAN) [MIM:140700]: Form of non-spherocytic hemolytic anemia of Dacie type 1. After splenectomy, which has little benefit, basophilic inclusions called Heinz bodies are demonstrable in the erythrocytes. Before splenectomy, diffuse or punctate basophilia may be evident. Most of these cases are probably instances of hemoglobinopathy. The hemoglobin demonstrates heat l…	carbon dioxide transport [GO:0015670]; cellular oxidant detoxification [GO:0098869]; hydrogen peroxide catabolic process [GO:0042744]; nitric oxide transport [GO:0030185]; oxygen transport [GO:0015671]; positive regulation of cell death [GO:0010942]; response to hydrogen peroxide [GO:0042542]	G protein-coupled receptor binding [GO:0001664]; heme binding [GO:0020037]; iron ion binding [GO:0005506]; organic acid binding [GO:0043177]; oxygen binding [GO:0019825]; oxygen carrier activity [GO:0005344]	blood microparticle [GO:0072562]; cytosol [GO:0005829]; cytosolic small ribosomal subunit [GO:0022627]; endocytic vesicle lumen [GO:0071682]; extracellular exosome [GO:0070062]; extracellular region [GO:0005576]; extracellular space [GO:0005615]; haptoglobin-hemoglobin complex [GO:0031838]; hemoglobin complex [GO:0005833]; membrane [GO:0016020]	GO:0001664; GO:0005344; GO:0005506; GO:0005576; GO:0005615; GO:0005829; GO:0005833; GO:0010942; GO:0015670; GO:0015671; GO:0016020; GO:0019825; GO:0020037; GO:0022627; GO:0030185; GO:0031838; GO:0042542; GO:0042744; GO:0043177; GO:0070062; GO:0071682; GO:0072562; GO:0098869	22.9352	22.5501	23.539	22.9024	23.0223	19.7801	20.9288	20.6637	20.8302	22.0228
CD55_P08174	0.870325	0.634155	0.952878	-0.0227563	1.78455	-1.08991	-0.79455	-0.63896	-1.0504	-0.645329	CD55	Complement decay-accelerating factor	P08174	1.63819	6.4578e-05	0.0126475	1.63819	sp|P08174|DAF_HUMAN Complement decay-accelerating factor OS=Homo sapiens OX=9606 GN=CD55 PE=1 SV=4	FUNCTION: This protein recognizes C4b and C3b fragments that condense with cell-surface hydroxyl or amino groups when nascent C4b and C3b are locally generated during C4 and c3 activation. Interaction of daf with cell-associated C4b and C3b polypeptides interferes with their ability to catalyze the conversion of C2 and factor B to enzymatically active C2a and Bb and thereby prevents the formation…	SUBCELLULAR LOCATION: [Isoform 1]: Cell membrane; Single-pass type I membrane protein.; SUBCELLULAR LOCATION: [Isoform 2]: Cell membrane; Lipid-anchor, GPI-anchor.; SUBCELLULAR LOCATION: [Isoform 3]: Secreted {ECO:0000269|PubMed:16503113}.; SUBCELLULAR LOCATION: [Isoform 4]: Secreted {ECO:0000269|PubMed:16503113}.; SUBCELLULAR LOCATION: [Isoform 5]: Secreted {ECO:0000269|PubMed:16503113}.; SUBCEL…	DISEASE: Complement hyperactivation, angiopathic thrombosis, and protein-losing enteropathy (CHAPLE) [MIM:226300]: An autosomal recessive disease characterized by abdominal pain and diarrhea, primary intestinal lymphangiectasia, edema due to hypoproteinemia, malabsorption, and less frequently, bowel inflammation, recurrent infections, and angiopathic thromboembolic disease. Patients' T lymphocyte…	complement activation, classical pathway [GO:0006958]; innate immune response [GO:0045087]; negative regulation of complement activation [GO:0045916]; negative regulation of complement activation, classical pathway [GO:0045959]; positive regulation of CD4-positive, alpha-beta T cell activation [GO:2000516]; positive regulation of CD4-positive, alpha-beta T cell proliferation [GO:2000563]; positiv…	lipid binding [GO:0008289]; virus receptor activity [GO:0001618]	anchored component of membrane [GO:0031225]; cell surface [GO:0009986]; endoplasmic reticulum-Golgi intermediate compartment membrane [GO:0033116]; extracellular exosome [GO:0070062]; extracellular region [GO:0005576]; ficolin-1-rich granule membrane [GO:0101003]; Golgi membrane [GO:0000139]; membrane raft [GO:0045121]; plasma membrane [GO:0005886]; secretory granule membrane [GO:0030667]; transp…	GO:0000139; GO:0001618; GO:0002456; GO:0002726; GO:0005576; GO:0005886; GO:0006958; GO:0007204; GO:0008289; GO:0009986; GO:0030133; GO:0030449; GO:0030667; GO:0031225; GO:0031664; GO:0033116; GO:0045087; GO:0045121; GO:0045730; GO:0045916; GO:0045959; GO:0070062; GO:0101003; GO:1903659; GO:2000516; GO:2000563	12.911	12.6818	12.9912	12.0441	13.7985	11.0083	11.295	11.446	11.0466	11.4398
TP53I11_O14683	1.01695	0.897139	1.23912	0.0458239	1.08473	-0.518033	-1.53812	-1.00026	-0.442016	-0.785326	TP53I11	Tumor protein p53-inducible protein 11	O14683	0.723264	6.69074e-05	0.0127183	0.723264	sp|O14683|P5I11_HUMAN Tumor protein p53-inducible protein 11 OS=Homo sapiens OX=9606 GN=TP53I11 PE=1 SV=2		SUBCELLULAR LOCATION: Membrane {ECO:0000305}; Multi-pass membrane protein {ECO:0000305}.		negative regulation of cell population proliferation [GO:0008285]		integral component of membrane [GO:0016021]	GO:0008285; GO:0016021	14.9306	14.88	15.0244	14.5207	14.9592	14.2827	13.8521	14.0792	14.3148	14.1699
TGM2_P21980	0.923092	1.04264	0.739188	0.20775	1.42025	-0.42724	-1.09909	-1.24531	-1.16405	-0.397237	TGM2	Protein-glutamine gamma-glutamyltransferase 2	P21980	0.560311	7.28626e-05	0.0134546	0.560311	sp|P21980|TGM2_HUMAN Protein-glutamine gamma-glutamyltransferase 2 OS=Homo sapiens OX=9606 GN=TGM2 PE=1 SV=2	FUNCTION: Calcium-dependent acyltransferase that catalyzes the formation of covalent bonds between peptide-bound glutamine and various primary amines, such as gamma-amino group of peptide-bound lysine, or mono- and polyamines, thereby producing cross-linked or aminated proteins, respectively (PubMed:9252372, PubMed:23941696, PubMed:31991788). Involved in many biological processes, such as bone de…	SUBCELLULAR LOCATION: Cytoplasm, cytosol {ECO:0000269|PubMed:24349085, ECO:0000269|PubMed:29618516, ECO:0000269|PubMed:9575137}. Nucleus {ECO:0000269|PubMed:29618516, ECO:0000269|PubMed:9575137}. Chromosome {ECO:0000269|PubMed:9575137}. Secreted, extracellular space, extracellular matrix {ECO:0000269|PubMed:12506096, ECO:0000269|PubMed:1683874}. Cell membrane {ECO:0000250|UniProtKB:Q9WVJ6}. Mitoc…	DISEASE: Note=TGM2 constitutes the major autoantigen in celiac disease, a multifactorial chronic disorder of the small intestine caused by intolerance to gluten (PubMed:9212111, PubMed:9623982). Celiac disease is characterized by immune-mediated enteropathy associated with failed intestinal absorption and malnutrition: intestinal inflammation is precipitated by ingestion of the protein gliadin, a…	apoptotic cell clearance [GO:0043277]; bone development [GO:0060348]; branching involved in salivary gland morphogenesis [GO:0060445]; cellular response to cocaine [GO:0071314]; cellular response to dopamine [GO:1903351]; cellular response to serotonin [GO:1904015]; negative regulation of endoplasmic reticulum calcium ion concentration [GO:0032471]; peptide cross-linking [GO:0018149]; phospholipa…	calcium ion binding [GO:0005509]; GTP binding [GO:0005525]; histone dopaminyltransferase activity [GO:0120297]; histone serotonyltransferase activity [GO:0120295]; peptidase activity [GO:0008233]; peptide histaminyltransferase activity [GO:0120299]; peptide noradrenalinyltransferase activity [GO:0120298]; protein-glutamine gamma-glutamyltransferase activity [GO:0003810]; protein-glutamine glutami…	chromatin [GO:0000785]; collagen-containing extracellular matrix [GO:0062023]; cytosol [GO:0005829]; endoplasmic reticulum [GO:0005783]; extracellular exosome [GO:0070062]; extracellular matrix [GO:0031012]; focal adhesion [GO:0005925]; intrinsic component of plasma membrane [GO:0031226]; mitochondrion [GO:0005739]; nucleus [GO:0005634]; perinuclear region of cytoplasm [GO:0048471]; plasma membra…	GO:0000785; GO:0003810; GO:0005509; GO:0005525; GO:0005634; GO:0005739; GO:0005783; GO:0005829; GO:0005886; GO:0005925; GO:0006508; GO:0007200; GO:0008233; GO:0018149; GO:0018277; GO:0031012; GO:0031226; GO:0032471; GO:0042981; GO:0043065; GO:0043277; GO:0043547; GO:0045785; GO:0048471; GO:0050568; GO:0050769; GO:0051057; GO:0051260; GO:0051561; GO:0060348; GO:0060445; GO:0060662; GO:0062023; GO:…	21.8955	21.9341	21.836	21.6642	22.0562	21.4589	21.2417	21.1944	21.2207	21.4686
PSME2_Q9UL46	-0.470648	-1.24071	-1.12933	0.00852181	-1.46143	0.640749	0.860362	1.15521	0.785121	0.852161	PSME2	Proteasome activator complex subunit 2	Q9UL46	0.627133	7.89617e-05	0.0141758	-0.627133	sp|Q9UL46|PSME2_HUMAN Proteasome activator complex subunit 2 OS=Homo sapiens OX=9606 GN=PSME2 PE=1 SV=4	FUNCTION: Implicated in immunoproteasome assembly and required for efficient antigen processing. The PA28 activator complex enhances the generation of class I binding peptides by altering the cleavage pattern of the proteasome.			positive regulation of endopeptidase activity [GO:0010950]; regulation of G1/S transition of mitotic cell cycle [GO:2000045]; regulation of proteasomal protein catabolic process [GO:0061136]	endopeptidase activator activity [GO:0061133]; identical protein binding [GO:0042802]	cytoplasm [GO:0005737]; cytosol [GO:0005829]; extracellular exosome [GO:0070062]; membrane [GO:0016020]; nucleoplasm [GO:0005654]; proteasome activator complex [GO:0008537]; proteasome complex [GO:0000502]	GO:0000502; GO:0005654; GO:0005737; GO:0005829; GO:0008537; GO:0010950; GO:0016020; GO:0042802; GO:0061133; GO:0061136; GO:0070062; GO:2000045	17.8122	17.531	17.5716	17.9871	17.4504	18.218	18.2982	18.4059	18.2707	18.2952
C1QTNF3_Q9BXJ4	0.938443	1.36462	0.785791	-0.231535	1.34152	-0.920764	-0.847725	-0.99019	-0.40194	-1.03822	C1QTNF3	Complement C1q tumor necrosis factor-related protein 3	Q9BXJ4	1.22895	8.72019e-05	0.015232	1.22895	sp|Q9BXJ4|C1QT3_HUMAN Complement C1q tumor necrosis factor-related protein 3 OS=Homo sapiens OX=9606 GN=C1QTNF3 PE=1 SV=1		SUBCELLULAR LOCATION: Secreted {ECO:0000305}.		cellular triglyceride homeostasis [GO:0035356]; fat cell differentiation [GO:0045444]; negative regulation of gene expression [GO:0010629]; negative regulation of gluconeogenesis [GO:0045721]; negative regulation of inflammatory response [GO:0050728]; negative regulation of interleukin-6 production [GO:0032715]; negative regulation of monocyte chemotactic protein-1 production [GO:0071638]; negati…	identical protein binding [GO:0042802]	collagen trimer [GO:0005581]; extracellular exosome [GO:0070062]; extracellular space [GO:0005615]; membrane [GO:0016020]	GO:0001819; GO:0005581; GO:0005615; GO:0010629; GO:0016020; GO:0032715; GO:0035356; GO:0042802; GO:0045444; GO:0045721; GO:0050728; GO:0070062; GO:0070165; GO:0071638; GO:1901223	13.338	13.6498	13.2263	12.4819	13.6329	11.9775	12.031	11.9267	12.3572	11.8916
ARFGEF3_Q5TH69	1.53636	0.545565	1.37786	-0.0975055	0.86273	-0.987692	-0.717231	-0.625506	-1.03004	-0.864548	ARFGEF3	Brefeldin A-inhibited guanine nucleotide-exchange protein 3	Q5TH69	0.751404	0.000105025	0.0171016	0.751404	sp|Q5TH69|BIG3_HUMAN Brefeldin A-inhibited guanine nucleotide-exchange protein 3 OS=Homo sapiens OX=9606 GN=ARFGEF3 PE=1 SV=3	FUNCTION: Participates in the regulation of systemic glucose homeostasis, where it negatively regulates insulin granule biogenesis in pancreatic islet beta cells (By similarity). Also regulates glucagon granule production in pancreatic alpha cells (By similarity). Inhibits nuclear translocation of the transcriptional coregulator PHB2 and may enhance estrogen receptor alpha (ESR1) transcriptional …	SUBCELLULAR LOCATION: Cytoplasm {ECO:0000269|PubMed:19496786}. Cytoplasmic vesicle, secretory vesicle {ECO:0000250|UniProtKB:Q3UGY8}. Cytoplasmic vesicle, secretory vesicle membrane {ECO:0000305}; Single-pass membrane protein {ECO:0000305}.		actin cytoskeleton organization [GO:0030036]; regulation of ARF protein signal transduction [GO:0032012]	guanyl-nucleotide exchange factor activity [GO:0005085]	integral component of membrane [GO:0016021]; transport vesicle membrane [GO:0030658]	GO:0005085; GO:0016021; GO:0030036; GO:0030658; GO:0032012	13.4866	13.0461	13.4161	12.7601	13.1871	12.3644	12.4846	12.5254	12.3455	12.4191
APOBEC2_Q9Y235	-0.956432	-1.56865	-0.868811	0.106973	-0.919492	0.70051	0.314068	1.19032	0.958365	1.04315	APOBEC2	Probable C->U-editing enzyme APOBEC-2	Q9Y235	0.849861	0.000106633	0.0171016	-0.849861	sp|Q9Y235|ABEC2_HUMAN C->U-editing enzyme APOBEC-2 OS=Homo sapiens OX=9606 GN=APOBEC2 PE=1 SV=1	FUNCTION: Probable C to U editing enzyme whose physiological substrate is not yet known. Does not display detectable apoB mRNA editing. Has a low intrinsic cytidine deaminase activity. May play a role in the epigenetic regulation of gene expression through the process of active DNA demethylation. {ECO:0000269|PubMed:17187054, ECO:0000269|PubMed:21496894}.			cytidine to uridine editing [GO:0016554]; DNA demethylation [GO:0080111]; mRNA modification [GO:0016556]; mRNA processing [GO:0006397]	cytidine deaminase activity [GO:0004126]; identical protein binding [GO:0042802]; metal ion binding [GO:0046872]; RNA binding [GO:0003723]	cytoplasm [GO:0005737]; nucleus [GO:0005634]	GO:0003723; GO:0004126; GO:0005634; GO:0005737; GO:0006397; GO:0016554; GO:0016556; GO:0042802; GO:0046872; GO:0080111	18.5914	18.2822	18.6357	19.1285	18.6101	19.4283	19.2332	19.6757	19.5586	19.6014
IVNS1ABP_Q9Y6Y0	0.676383	0.842174	0.864706	0.0846298	1.77515	-1.2625	-0.555363	-0.88413	-0.937517	-0.603532	IVNS1ABP	Influenza virus NS1A-binding protein	Q9Y6Y0	0.662985	0.000108601	0.0171016	0.662985	sp|Q9Y6Y0|NS1BP_HUMAN Influenza virus NS1A-binding protein OS=Homo sapiens OX=9606 GN=IVNS1ABP PE=1 SV=3	FUNCTION: Involved in many cell functions, including pre-mRNA splicing, the aryl hydrocarbon receptor (AHR) pathway, F-actin organization and protein ubiquitination. Plays a role in the dynamic organization of the actin skeleton as a stabilizer of actin filaments by association with F-actin through Kelch repeats (By similarity). Protects cells from cell death induced by actin destabilization (By …	SUBCELLULAR LOCATION: Cytoplasm {ECO:0000269|PubMed:9696811}. Cytoplasm, cytoskeleton {ECO:0000269|PubMed:9696811}. Nucleus, nucleoplasm {ECO:0000269|PubMed:9696811}. Note=Associated with actin filaments (By similarity). Localization related to speckle domains which correspond to interchromatin granules and are enriched in factors involved in pre-mRNA splicing (PubMed:9696811). Following influenz…	DISEASE: Immunodeficiency 70 (IMD70) [MIM:618969]: A primary immunodeficiency clinically characterized by human papillomavirus-associated warts on the hands, feet and face, recurrent bacterial infections, and autoinflammatory features, such as colitis, celiac disease, and retinal vasculitis. Immunologic workup shows decreased CD4+ T cells, decreased CD19+ B cells, and hypogammaglobulinemia. IMD70…	intrinsic apoptotic signaling pathway [GO:0097193]; negative regulation of intrinsic apoptotic signaling pathway [GO:2001243]; negative regulation of protein ubiquitination [GO:0031397]; response to virus [GO:0009615]; RNA splicing [GO:0008380]; transcription by RNA polymerase III [GO:0006383]		cytoskeleton [GO:0005856]; cytosol [GO:0005829]; nucleoplasm [GO:0005654]; spliceosomal complex [GO:0005681]; transcription regulator complex [GO:0005667]	GO:0005654; GO:0005667; GO:0005681; GO:0005829; GO:0005856; GO:0006383; GO:0008380; GO:0009615; GO:0031397; GO:0097193; GO:2001243	16.4292	16.4939	16.5027	16.198	16.8584	15.6718	15.948	15.8196	15.7987	15.9292
PRCP_P42785	-0.96489	-0.933608	-0.927181	-0.679746	-0.772419	1.59214	0.761272	0.771816	-0.0962261	1.24884	PRCP	Lysosomal Pro-X carboxypeptidase	P42785	0.562931	0.00011264	0.0171016	-0.562931	sp|P42785|PCP_HUMAN Lysosomal Pro-X carboxypeptidase OS=Homo sapiens OX=9606 GN=PRCP PE=1 SV=1	FUNCTION: Cleaves C-terminal amino acids linked to proline in peptides such as angiotensin II, III and des-Arg9-bradykinin. This cleavage occurs at acidic pH, but enzymatic activity is retained with some substrates at neutral pH.	SUBCELLULAR LOCATION: Lysosome.		angiogenesis involved in wound healing [GO:0060055]; energy homeostasis [GO:0097009]; glucose homeostasis [GO:0042593]; negative regulation of systemic arterial blood pressure [GO:0003085]; plasma kallikrein-kinin cascade [GO:0002353]; proteolysis [GO:0006508]; regulation of blood vessel endothelial cell migration [GO:0043535]; regulation of reactive oxygen species metabolic process [GO:2000377];…	dipeptidyl-peptidase activity [GO:0008239]; serine-type carboxypeptidase activity [GO:0004185]	azurophil granule membrane [GO:0035577]; basal part of cell [GO:0045178]; extracellular exosome [GO:0070062]; ficolin-1-rich granule membrane [GO:0101003]; intracellular membrane-bounded organelle [GO:0043231]; plasma membrane [GO:0005886]	GO:0002155; GO:0002353; GO:0003085; GO:0004185; GO:0005886; GO:0006508; GO:0008239; GO:0035577; GO:0042593; GO:0043231; GO:0043535; GO:0045178; GO:0060055; GO:0070062; GO:0097009; GO:0101003; GO:2000377	15.596	15.6063	15.6084	15.6898	15.6593	16.4372	16.1638	16.1673	15.8817	16.3243
ENTPD1_P49961	0.852295	1.70883	0.746967	-0.0217092	0.932628	-0.933832	-1.30885	-0.615386	-0.54751	-0.813437	ENTPD1	Ectonucleoside triphosphate diphosphohydrolase 1	P49961	0.738003	0.000112879	0.0171016	0.738003	sp|P49961|ENTP1_HUMAN Ectonucleoside triphosphate diphosphohydrolase 1 OS=Homo sapiens OX=9606 GN=ENTPD1 PE=1 SV=1	FUNCTION: In the nervous system, could hydrolyze ATP and other nucleotides to regulate purinergic neurotransmission. Could also be implicated in the prevention of platelet aggregation by hydrolyzing platelet-activating ADP to AMP. Hydrolyzes ATP and ADP equally well. {ECO:0000269|PubMed:8955160}.	SUBCELLULAR LOCATION: Membrane {ECO:0000305}; Multi-pass membrane protein {ECO:0000305}.	DISEASE: Spastic paraplegia 64, autosomal recessive (SPG64) [MIM:615683]: A form of spastic paraplegia, a neurodegenerative disorder characterized by a slow, gradual, progressive weakness and spasticity of the lower limbs. Rate of progression and the severity of symptoms are quite variable. Initial symptoms may include difficulty with balance, weakness and stiffness in the legs, muscle spasms, an…	blood coagulation [GO:0007596]; cell adhesion [GO:0007155]; nucleoside diphosphate catabolic process [GO:0009134]	8-oxo-dGTP phosphohydrolase activity [GO:0102490]; ATP binding [GO:0005524]; dATP phosphohydrolase activity [GO:0102485]; dCTP phosphohydrolase activity [GO:0102486]; dGTP phosphohydrolase activity [GO:0102491]; dTTP phosphohydrolase activity [GO:0102488]; dUTP phosphohydrolase activity [GO:0102487]; GTP phosphohydrolase activity [GO:0102489]; guanosine-diphosphatase activity [GO:0004382]; nucleo…	extracellular exosome [GO:0070062]; integral component of plasma membrane [GO:0005887]; membrane [GO:0016020]; plasma membrane [GO:0005886]	GO:0004382; GO:0005524; GO:0005886; GO:0005887; GO:0007155; GO:0007596; GO:0009134; GO:0016020; GO:0017110; GO:0045134; GO:0070062; GO:0102485; GO:0102486; GO:0102487; GO:0102488; GO:0102489; GO:0102490; GO:0102491	18.0125	18.3871	17.9664	17.6303	18.0476	17.2314	17.0674	17.3707	17.4004	17.2841
ANK1_P16157	0.810822	0.964538	1.4977	1.01731	-0.101238	-0.83776	-1.24589	-1.20423	-0.532982	-0.368272	ANK1	Ankyrin-1	P16157	0.907111	0.000115842	0.0171016	0.907111	sp|P16157|ANK1_HUMAN Ankyrin-1 OS=Homo sapiens OX=9606 GN=ANK1 PE=1 SV=3	FUNCTION: Attaches integral membrane proteins to cytoskeletal elements; binds to the erythrocyte membrane protein band 4.2, to Na-K ATPase, to the lymphocyte membrane protein GP85, and to the cytoskeletal proteins fodrin, tubulin, vimentin and desmin. Erythrocyte ankyrins also link spectrin (beta chain) to the cytoplasmic domain of the erythrocytes anion exchange protein; they retain most or all …	SUBCELLULAR LOCATION: [Isoform Er1]: Cytoplasm, cytoskeleton. Note=Probably the other erythrocyte (Er) isoforms, are located near the surface of erythrocytic plasma membrane.; SUBCELLULAR LOCATION: [Isoform Mu17]: Membrane. Cytoplasm, myofibril, sarcomere, M line. Note=Colocalizes with OBSCN isoform 3/obscurin at the M line in differentiated skeletal muscle cells.; SUBCELLULAR LOCATION: [Isoform …	DISEASE: Spherocytosis 1 (SPH1) [MIM:182900]: A form of spherocytosis, a hematologic disorder leading to chronic hemolytic anemia and characterized by numerous abnormally shaped erythrocytes which are generally spheroidal. SPH1 is characterized by severe hemolytic anemia. Inheritance can be autosomal dominant or autosomal recessive. Patients with homozygous mutations have a more severe disorder. …	cytoskeleton organization [GO:0007010]; endoplasmic reticulum to Golgi vesicle-mediated transport [GO:0006888]; exocytosis [GO:0006887]; maintenance of epithelial cell apical/basal polarity [GO:0045199]; protein localization to plasma membrane [GO:0072659]; signal transduction [GO:0007165]	ATPase binding [GO:0051117]; cytoskeletal anchor activity [GO:0008093]; enzyme binding [GO:0019899]; protein phosphatase binding [GO:0019903]; spectrin binding [GO:0030507]; structural constituent of cytoskeleton [GO:0005200]; structural molecule activity [GO:0005198]; transmembrane transporter binding [GO:0044325]	basolateral plasma membrane [GO:0016323]; cytoplasmic side of plasma membrane [GO:0009898]; cytoskeleton [GO:0005856]; cytosol [GO:0005829]; M band [GO:0031430]; neuron projection [GO:0043005]; plasma membrane [GO:0005886]; sarcoplasmic reticulum [GO:0016529]; spectrin-associated cytoskeleton [GO:0014731]	GO:0005198; GO:0005200; GO:0005829; GO:0005856; GO:0005886; GO:0006887; GO:0006888; GO:0007010; GO:0007165; GO:0008093; GO:0009898; GO:0014731; GO:0016323; GO:0016529; GO:0019899; GO:0019903; GO:0030507; GO:0031430; GO:0043005; GO:0044325; GO:0045199; GO:0051117; GO:0072659	17.4848	17.568	17.8566	17.5966	16.991	16.5923	16.3714	16.3939	16.7573	16.8465
PLTP_P55058	-1.05458	-0.50005	-1.2253	-0.503138	-0.925876	0.643844	0.781234	0.838786	1.81098	0.134091	PLTP	Phospholipid transfer protein	P55058	0.768821	0.000116427	0.0171016	-0.768821	sp|P55058|PLTP_HUMAN Phospholipid transfer protein OS=Homo sapiens OX=9606 GN=PLTP PE=1 SV=1	FUNCTION: Mediates the transfer of phospholipids and free cholesterol from triglyceride-rich lipoproteins (low density lipoproteins or LDL and very low density lipoproteins or VLDL) into high-density lipoproteins (HDL) as well as the exchange of phospholipids between triglyceride-rich lipoproteins themselves (PubMed:7654777, PubMed:9132017, PubMed:11013307, PubMed:19321130, PubMed:21515415, PubMe…	SUBCELLULAR LOCATION: Secreted {ECO:0000269|PubMed:19321130}. Nucleus {ECO:0000269|PubMed:19321130}. Note=Nuclear export is XPO1/CRM1-dependent. {ECO:0000269|PubMed:19321130}.		ceramide transport [GO:0035627]; flagellated sperm motility [GO:0030317]; glycolipid transport [GO:0046836]; high-density lipoprotein particle remodeling [GO:0034375]; lipid metabolic process [GO:0006629]; lipid transport [GO:0006869]; phospholipid transport [GO:0015914]; positive regulation of cholesterol efflux [GO:0010875]; vitamin E biosynthetic process [GO:0010189]	ceramide binding [GO:0097001]; ceramide transfer activity [GO:0120017]; cerebroside transfer activity [GO:0140340]; cholesterol transfer activity [GO:0120020]; diacylglyceride transfer activity [GO:0140337]; diacylglycerol binding [GO:0019992]; high-density lipoprotein particle binding [GO:0008035]; low-density lipoprotein particle binding [GO:0030169]; phosphatidic acid binding [GO:0070300]; pho…	extracellular region [GO:0005576]; extracellular space [GO:0005615]; high-density lipoprotein particle [GO:0034364]; nucleus [GO:0005634]	GO:0005576; GO:0005615; GO:0005634; GO:0006629; GO:0006869; GO:0008035; GO:0008429; GO:0008525; GO:0008526; GO:0010189; GO:0010875; GO:0015914; GO:0019992; GO:0030169; GO:0030317; GO:0031210; GO:0034189; GO:0034364; GO:0034375; GO:0035627; GO:0046836; GO:0070300; GO:0097001; GO:0120014; GO:0120017; GO:0120019; GO:0120020; GO:0140337; GO:0140338; GO:0140339; GO:0140340; GO:1901611; GO:1904121; GO:…	15.2289	15.4822	15.151	15.4808	15.2877	16.0045	16.0673	16.0936	16.5375	15.7718
MCAM_P43121	1.11507	1.06913	0.99581	-0.235963	1.25503	-0.945405	-0.263399	-0.819435	-1.07465	-1.0962	MCAM	Cell surface glycoprotein MUC18	P43121	0.741192	0.000131615	0.0186563	0.741192	sp|P43121|MUC18_HUMAN Cell surface glycoprotein MUC18 OS=Homo sapiens OX=9606 GN=MCAM PE=1 SV=2	FUNCTION: Plays a role in cell adhesion, and in cohesion of the endothelial monolayer at intercellular junctions in vascular tissue. Its expression may allow melanoma cells to interact with cellular elements of the vascular system, thereby enhancing hematogeneous tumor spread. Could be an adhesion molecule active in neural crest cells during embryonic development. Acts as surface receptor that tr…	SUBCELLULAR LOCATION: Membrane; Single-pass type I membrane protein.		anatomical structure morphogenesis [GO:0009653]; angiogenesis [GO:0001525]; cell adhesion [GO:0007155]; glomerular filtration [GO:0003094]; positive regulation of cell migration [GO:0030335]; vascular wound healing [GO:0061042]		external side of plasma membrane [GO:0009897]; extracellular region [GO:0005576]; extracellular space [GO:0005615]; focal adhesion [GO:0005925]; integral component of membrane [GO:0016021]; nucleus [GO:0005634]; plasma membrane [GO:0005886]	GO:0001525; GO:0003094; GO:0005576; GO:0005615; GO:0005634; GO:0005886; GO:0005925; GO:0007155; GO:0009653; GO:0009897; GO:0016021; GO:0030335; GO:0061042	19.7901	19.7699	19.7375	19.1939	19.8519	18.8809	19.1818	18.9365	18.8239	18.8143
ACTN1_P12814	1.49592	0.930182	0.520005	-0.191854	1.43335	-0.832236	-0.782525	-0.904817	-0.732951	-0.935083	ACTN1	Alpha-actinin-1	P12814	0.792956	0.000133343	0.0186563	0.792956	sp|P12814|ACTN1_HUMAN Alpha-actinin-1 OS=Homo sapiens OX=9606 GN=ACTN1 PE=1 SV=2	FUNCTION: F-actin cross-linking protein which is thought to anchor actin to a variety of intracellular structures. This is a bundling protein.	SUBCELLULAR LOCATION: Cytoplasm, cytoskeleton {ECO:0000269|PubMed:24069336, ECO:0000269|PubMed:7750553}. Cytoplasm, myofibril, sarcomere, Z line {ECO:0000269|PubMed:7750553}. Cell membrane {ECO:0000250|UniProtKB:Q9Z1P2}. Cell junction {ECO:0000250|UniProtKB:Q9Z1P2}. Cell projection, ruffle {ECO:0000250|UniProtKB:Q7TPR4}. Note=Colocalizes with MYOZ2 and PPP3CA at the Z-line of heart and skeletal m…	DISEASE: Bleeding disorder, platelet-type, 15 (BDPLT15) [MIM:615193]: An autosomal dominant form of macrothrombocytopenia. Affected individuals usually have no or only mild bleeding tendency, such as epistaxis. Laboratory studies show decreased numbers of large platelets and anisocytosis, but the platelets show no in vitro functional abnormalities. {ECO:0000269|PubMed:23434115, ECO:0000269|PubMed…	actin cytoskeleton organization [GO:0030036]; actin filament bundle assembly [GO:0051017]; actin filament network formation [GO:0051639]; actin filament organization [GO:0007015]; focal adhesion assembly [GO:0048041]; muscle cell development [GO:0055001]; platelet formation [GO:0030220]; platelet morphogenesis [GO:0036344]; regulation of apoptotic process [GO:0042981]	actin filament binding [GO:0051015]; calcium ion binding [GO:0005509]; cytoskeletal regulatory protein binding [GO:0005519]; double-stranded RNA binding [GO:0003725]; integrin binding [GO:0005178]; nuclear receptor coactivator activity [GO:0030374]; protein domain specific binding [GO:0019904]; protein homodimerization activity [GO:0042803]; structural constituent of postsynapse [GO:0099186]; tra…	brush border [GO:0005903]; cell junction [GO:0030054]; cell projection [GO:0042995]; cell-cell junction [GO:0005911]; cortical actin cytoskeleton [GO:0030864]; cytoplasm [GO:0005737]; cytosol [GO:0005829]; dendritic spine [GO:0043197]; extracellular exosome [GO:0070062]; extracellular region [GO:0005576]; extracellular space [GO:0005615]; fascia adherens [GO:0005916]; focal adhesion [GO:0005925];…	GO:0001725; GO:0001726; GO:0003725; GO:0005178; GO:0005509; GO:0005519; GO:0005576; GO:0005615; GO:0005634; GO:0005737; GO:0005829; GO:0005886; GO:0005903; GO:0005911; GO:0005916; GO:0005925; GO:0007015; GO:0017166; GO:0019904; GO:0030018; GO:0030036; GO:0030054; GO:0030220; GO:0030374; GO:0030864; GO:0031093; GO:0031143; GO:0036344; GO:0042803; GO:0042981; GO:0042995; GO:0043197; GO:0044325; GO:…	22.3806	22.1128	21.9186	21.5816	22.351	21.2785	21.302	21.2441	21.3255	21.2298
CECR1_Q9NZK5	0.863034	1.72174	0.44166	0.204676	0.985258	-0.707657	-0.265315	-1.13563	-1.07523	-1.03254	CECR1	Adenosine deaminase CECR1	Q9NZK5	0.649062	0.000138496	0.0186563	0.649062	sp|Q9NZK5|ADA2_HUMAN Adenosine deaminase 2 OS=Homo sapiens OX=9606 GN=ADA2 PE=1 SV=2	FUNCTION: Adenosine deaminase that may contribute to the degradation of extracellular adenosine, a signaling molecule that controls a variety of cellular responses. Requires elevated adenosine levels for optimal enzyme activity. Binds to cell surfaces via proteoglycans and may play a role in the regulation of cell proliferation and differentiation, independently of its enzyme activity. {ECO:00002…	SUBCELLULAR LOCATION: Secreted {ECO:0000269|PubMed:15926889, ECO:0000269|PubMed:20147294, ECO:0000269|PubMed:20453107}.	DISEASE: Vasculitis, autoinflammation, immunodeficiency, and hematologic defects syndrome (VAIHS) [MIM:615688]: An autosomal recessive, systemic necrotizing vasculitis that affects medium and small arteries. The ensuing tissue ischemia can affect any organ, including the skin, musculoskeletal system, kidneys, gastrointestinal tract, and the cardiovascular and nervous systems. Organ involvement an…	adenosine catabolic process [GO:0006154]; inosine biosynthetic process [GO:0046103]	adenosine deaminase activity [GO:0004000]; adenosine receptor binding [GO:0031685]; growth factor activity [GO:0008083]; heparin binding [GO:0008201]; protein homodimerization activity [GO:0042803]; proteoglycan binding [GO:0043394]; zinc ion binding [GO:0008270]	azurophil granule lumen [GO:0035578]; extracellular region [GO:0005576]; extracellular space [GO:0005615]	GO:0004000; GO:0005576; GO:0005615; GO:0006154; GO:0008083; GO:0008201; GO:0008270; GO:0031685; GO:0035578; GO:0042803; GO:0043394; GO:0046103	15.7955	16.126	15.6334	15.5422	15.8426	15.191	15.3613	15.0263	15.0496	15.066
ATP2A3_Q93084	0.666075	1.38194	1.03029	0.254254	0.904891	-1.10136	-1.58861	-0.817837	-0.242524	-0.487113	ATP2A3	Sarcoplasmic/endoplasmic reticulum calcium ATPase 3	Q93084	0.591612	0.000138558	0.0186563	0.591612	sp|Q93084|AT2A3_HUMAN Sarcoplasmic/endoplasmic reticulum calcium ATPase 3 OS=Homo sapiens OX=9606 GN=ATP2A3 PE=1 SV=3	FUNCTION: This magnesium-dependent enzyme catalyzes the hydrolysis of ATP coupled with the transport of calcium. Transports calcium ions from the cytosol into the sarcoplasmic/endoplasmic reticulum lumen. Contributes to calcium sequestration involved in muscular excitation/contraction. {ECO:0000269|PubMed:11956212, ECO:0000269|PubMed:15028735}.	SUBCELLULAR LOCATION: Nucleus membrane {ECO:0000269|PubMed:15028735}; Multi-pass membrane protein {ECO:0000269|PubMed:15028735}. Endoplasmic reticulum membrane {ECO:0000269|PubMed:15028735}; Multi-pass membrane protein {ECO:0000269|PubMed:15028735}. Sarcoplasmic reticulum membrane {ECO:0000269|PubMed:15028735}; Multi-pass membrane protein {ECO:0000269|PubMed:15028735}.		activation of cysteine-type endopeptidase activity involved in apoptotic process [GO:0006919]; calcium ion transmembrane transport [GO:0070588]; calcium ion transport [GO:0006816]; calcium ion transport from cytosol to endoplasmic reticulum [GO:1903515]; cellular calcium ion homeostasis [GO:0006874]; intrinsic apoptotic signaling pathway in response to endoplasmic reticulum stress [GO:0070059]; i…	ATP binding [GO:0005524]; ATP hydrolysis activity [GO:0016887]; calcium ion transmembrane transporter activity [GO:0015085]; calcium-dependent ATPase activity [GO:0030899]; cysteine-type endopeptidase activator activity involved in apoptotic process [GO:0008656]; metal ion binding [GO:0046872]; P-type calcium transporter activity [GO:0005388]; P-type ion transporter activity [GO:0015662]; transme…	endoplasmic reticulum [GO:0005783]; endoplasmic reticulum membrane [GO:0005789]; integral component of membrane [GO:0016021]; nuclear membrane [GO:0031965]; organelle membrane [GO:0031090]; platelet dense tubular network membrane [GO:0031095]; sarcoplasmic reticulum [GO:0016529]; sarcoplasmic reticulum membrane [GO:0033017]	GO:0005388; GO:0005524; GO:0005783; GO:0005789; GO:0006816; GO:0006874; GO:0006919; GO:0008656; GO:0015085; GO:0015662; GO:0016021; GO:0016529; GO:0016887; GO:0030899; GO:0031090; GO:0031095; GO:0031965; GO:0033017; GO:0034220; GO:0044325; GO:0046872; GO:0070059; GO:0070588; GO:0150104; GO:1900121; GO:1903515; GO:1903779	15.4265	15.6763	15.5536	15.2827	15.5098	14.8096	14.6395	14.9085	15.1093	15.0239
TNXB_P22105	1.27606	1.54314	0.404694	-0.209577	1.12704	-0.778793	-0.891979	-0.755428	-0.672133	-1.04302	TNXB	Tenascin-X	P22105	1.18213	0.000143996	0.0189927	1.18213	sp|P22105|TENX_HUMAN Tenascin-X OS=Homo sapiens OX=9606 GN=TNXB PE=1 SV=5	FUNCTION: Appears to mediate interactions between cells and the extracellular matrix. Substrate-adhesion molecule that appears to inhibit cell migration. Accelerates collagen fibril formation. May play a role in supporting the growth of epithelial tumors. {ECO:0000269|PubMed:17033827}.	SUBCELLULAR LOCATION: Secreted, extracellular space, extracellular matrix.	DISEASE: Ehlers-Danlos syndrome, classic-like (EDSCLL) [MIM:606408]: A form of Ehlers-Danlos syndrome, a group of connective tissue disorders characterized by skin hyperextensibility, articular hypermobility, and tissue fragility. EDSCLL patients lack atrophic scars, a major diagnostic criteria for classic Ehlers-Danlos syndrome. Delayed wound healing is only present in a subset of patients. EDSC…	actin cytoskeleton organization [GO:0030036]; cell adhesion [GO:0007155]; cell-cell adhesion [GO:0098609]; cell-matrix adhesion [GO:0007160]; collagen fibril organization [GO:0030199]; collagen metabolic process [GO:0032963]; elastic fiber assembly [GO:0048251]; extracellular matrix organization [GO:0030198]; fatty acid metabolic process [GO:0006631]; positive regulation of cell fate determinatio…	collagen binding [GO:0005518]; collagen fibril binding [GO:0098633]; extracellular matrix structural constituent [GO:0005201]; heparin binding [GO:0008201]; integrin binding [GO:0005178]	collagen-containing extracellular matrix [GO:0062023]; extracellular exosome [GO:0070062]; extracellular matrix [GO:0031012]; extracellular region [GO:0005576]; extracellular space [GO:0005615]	GO:0005178; GO:0005201; GO:0005518; GO:0005576; GO:0005615; GO:0006631; GO:0006641; GO:0007155; GO:0007160; GO:0008201; GO:0030036; GO:0030155; GO:0030198; GO:0030199; GO:0031012; GO:0032963; GO:0043506; GO:0045595; GO:0048251; GO:0062023; GO:0070062; GO:0098609; GO:0098633; GO:1904028; GO:1905935	21.9987	22.1893	21.3769	20.9385	21.8924	20.5323	20.4516	20.549	20.6084	20.3438
UBFD1_O14562	-0.775488	-1.65856	-1.2415	-0.287806	-0.348583	1.11303	0.894054	0.933508	0.847237	0.524117	UBFD1	Ubiquitin domain-containing protein UBFD1	O14562	0.461901	0.000147104	0.0190146	-0.461901	sp|O14562|UBFD1_HUMAN Ubiquitin domain-containing protein UBFD1 OS=Homo sapiens OX=9606 GN=UBFD1 PE=1 SV=2	FUNCTION: May play a role as NF-kappa-B regulator. {ECO:0000269|PubMed:19285159}.				cadherin binding [GO:0045296]; RNA binding [GO:0003723]		GO:0003723; GO:0045296	17.9805	17.744	17.8557	18.1111	18.0948	18.4862	18.4276	18.4382	18.4151	18.3285
DAG1_Q14118	1.02326	1.20746	0.6539	0.112811	1.31516	-1.14489	-1.1198	-0.268655	-0.660208	-1.11904	DAG1	Dystroglycan;Alpha-dystroglycan;Beta-dystroglycan	Q14118	0.457191	0.000151128	0.0191518	0.457191	sp|Q14118|DAG1_HUMAN Dystroglycan 1 OS=Homo sapiens OX=9606 GN=DAG1 PE=1 SV=2	FUNCTION: The dystroglycan complex is involved in a number of processes including laminin and basement membrane assembly, sarcolemmal stability, cell survival, peripheral nerve myelination, nodal structure, cell migration, and epithelial polarization.; FUNCTION: [Alpha-dystroglycan]: Extracellular peripheral glycoprotein that acts as a receptor for extracellular matrix proteins containing laminin…	SUBCELLULAR LOCATION: [Alpha-dystroglycan]: Secreted, extracellular space.; SUBCELLULAR LOCATION: [Beta-dystroglycan]: Cell membrane {ECO:0000269|PubMed:18764929}; Single-pass type I membrane protein. Cytoplasm, cytoskeleton. Nucleus, nucleoplasm {ECO:0000269|PubMed:18764929}. Cell membrane, sarcolemma {ECO:0000250}. Postsynaptic cell membrane {ECO:0000250}. Note=The monomeric form translocates t…	DISEASE: Muscular dystrophy-dystroglycanopathy limb-girdle C9 (MDDGC9) [MIM:613818]: An autosomal recessive muscular dystrophy showing onset in early childhood, and associated with intellectual disability without structural brain anomalies. {ECO:0000269|PubMed:21388311, ECO:0000269|PubMed:25503980}. Note=The disease is caused by variants affecting the gene represented in this entry. MDDGC7 is cau…	aging [GO:0007568]; angiogenesis involved in wound healing [GO:0060055]; axon guidance [GO:0007411]; axon regeneration [GO:0031103]; basement membrane organization [GO:0071711]; branching involved in salivary gland morphogenesis [GO:0060445]; calcium-dependent cell-matrix adhesion [GO:0016340]; cellular response to cholesterol [GO:0071397]; cellular response to mechanical stimulus [GO:0071260]; c…	actin binding [GO:0003779]; alpha-actinin binding [GO:0051393]; calcium ion binding [GO:0005509]; dystroglycan binding [GO:0002162]; laminin binding [GO:0043236]; laminin-1 binding [GO:0043237]; SH2 domain binding [GO:0042169]; structural constituent of muscle [GO:0008307]; tubulin binding [GO:0015631]; vinculin binding [GO:0017166]; virus receptor activity [GO:0001618]	adherens junction [GO:0005912]; basement membrane [GO:0005604]; basolateral plasma membrane [GO:0016323]; collagen-containing extracellular matrix [GO:0062023]; contractile ring [GO:0070938]; costamere [GO:0043034]; cytoplasm [GO:0005737]; cytoskeleton [GO:0005856]; cytosol [GO:0005829]; dystroglycan complex [GO:0016011]; dystrophin-associated glycoprotein complex [GO:0016010]; endoplasmic reticu…	GO:0001618; GO:0001954; GO:0002009; GO:0002011; GO:0002162; GO:0003779; GO:0005509; GO:0005576; GO:0005604; GO:0005615; GO:0005654; GO:0005737; GO:0005788; GO:0005796; GO:0005829; GO:0005856; GO:0005886; GO:0005912; GO:0005925; GO:0006509; GO:0007411; GO:0007568; GO:0008307; GO:0009897; GO:0010470; GO:0010717; GO:0014894; GO:0015631; GO:0016010; GO:0016011; GO:0016021; GO:0016203; GO:0016323; GO:…	19.5455	19.5943	19.4476	19.3042	19.6229	18.9709	18.9775	19.2031	19.0994	18.9777
PLCB4_Q15147	1.05823	1.8888	0.650177	0.00904208	0.553261	-0.846698	-1.132	-0.728271	-0.73046	-0.722084	PLCB4	1-phosphatidylinositol 4,5-bisphosphate phosphodiesterase beta-4	Q15147	0.833272	0.000157954	0.0196318	0.833272	sp|Q15147|PLCB4_HUMAN 1-phosphatidylinositol 4,5-bisphosphate phosphodiesterase beta-4 OS=Homo sapiens OX=9606 GN=PLCB4 PE=1 SV=3	FUNCTION: The production of the second messenger molecules diacylglycerol (DAG) and inositol 1,4,5-trisphosphate (IP3) is mediated by activated phosphatidylinositol-specific phospholipase C enzymes. This form has a role in retina signal transduction. {ECO:0000250|UniProtKB:Q07722}.		DISEASE: Auriculocondylar syndrome 2 (ARCND2) [MIM:614669]: A craniofacial malformation syndrome characterized by variable mandibular anomalies, including mild to severe micrognathia, temporomandibular joint ankylosis, cleft palate, and a characteristic ear malformation that consists of separation of the lobule from the external ear, giving the appearance of a question mark (question-mark ear). O…	G protein-coupled receptor signaling pathway [GO:0007186]; lipid catabolic process [GO:0016042]; phosphatidylinositol-mediated signaling [GO:0048015]	calcium ion binding [GO:0005509]; phosphatidylinositol phospholipase C activity [GO:0004435]; phospholipase C activity [GO:0004629]	cytosol [GO:0005829]	GO:0004435; GO:0004629; GO:0005509; GO:0005829; GO:0007186; GO:0016042; GO:0048015	16.5522	16.9681	16.3478	16.0267	16.2993	15.5981	15.4553	15.6575	15.6564	15.6606
POSTN_Q15063	1.11069	1.44318	0.817622	-0.449997	1.1804	-0.845776	-0.647284	-0.895318	-0.944179	-0.769335	POSTN	Periostin	Q15063	2.46121	0.000164981	0.020004	2.46121	sp|Q15063|POSTN_HUMAN Periostin OS=Homo sapiens OX=9606 GN=POSTN PE=1 SV=2	FUNCTION: Induces cell attachment and spreading and plays a role in cell adhesion (PubMed:12235007). Enhances incorporation of BMP1 in the fibronectin matrix of connective tissues, and subsequent proteolytic activation of lysyl oxidase LOX (By similarity). {ECO:0000250|UniProtKB:Q62009, ECO:0000269|PubMed:12235007}.	SUBCELLULAR LOCATION: Golgi apparatus {ECO:0000250|UniProtKB:Q62009}. Secreted {ECO:0000269|PubMed:18450759, ECO:0000269|PubMed:26273833}. Secreted, extracellular space, extracellular matrix {ECO:0000269|PubMed:12235007, ECO:0000269|PubMed:18450759}. Note=Colocalizes with BMP1 in the Golgi. {ECO:0000250|UniProtKB:Q62009}.		cell adhesion [GO:0007155]; cellular response to vitamin K [GO:0071307]; extracellular matrix organization [GO:0030198]; regulation of Notch signaling pathway [GO:0008593]; tissue development [GO:0009888]	cell adhesion molecule binding [GO:0050839]; heparin binding [GO:0008201]; metal ion binding [GO:0046872]	collagen-containing extracellular matrix [GO:0062023]; extracellular matrix [GO:0031012]; extracellular space [GO:0005615]; trans-Golgi network [GO:0005802]	GO:0005615; GO:0005802; GO:0007155; GO:0008201; GO:0008593; GO:0009888; GO:0030198; GO:0031012; GO:0046872; GO:0050839; GO:0062023; GO:0071307	22.7496	23.2483	22.3099	20.4085	22.8541	19.8148	20.1125	19.7405	19.6672	19.9294
CAPN5_O15484	0.595909	1.08969	0.756998	0.0721346	1.67097	-1.24455	-1.26218	-0.539243	-0.520951	-0.61878	CAPN5	Calpain-5	O15484	0.667892	0.000167139	0.020004	0.667892	sp|O15484|CAN5_HUMAN Calpain-5 OS=Homo sapiens OX=9606 GN=CAPN5 PE=1 SV=2	FUNCTION: Calcium-regulated non-lysosomal thiol-protease. {ECO:0000250}.		DISEASE: Vitreoretinopathy, neovascular inflammatory (VRNI) [MIM:193235]: An autoimmune condition of the eye that sequentially mimics uveitis, retinitis pigmentosa, and proliferative diabetic retinopathy as it progresses to complete blindness. Patients present during the second or third decade of life with posterior uveitis and reduction of the electroretinogram b-wave. They become more symptomat…	proteolysis [GO:0006508]; signal transduction [GO:0007165]	calcium-dependent cysteine-type endopeptidase activity [GO:0004198]	cell surface [GO:0009986]; cytoplasm [GO:0005737]; extracellular exosome [GO:0070062]; focal adhesion [GO:0005925]; synapse [GO:0045202]	GO:0004198; GO:0005737; GO:0005925; GO:0006508; GO:0007165; GO:0009986; GO:0045202; GO:0070062	14.7133	14.9103	14.7776	14.5044	15.1422	13.9791	13.9721	14.2605	14.2678	14.2288
FBXW11_Q9UKB1	0.848326	0.491799	1.53368	0.331917	1.18787	-0.505808	-0.872126	-1.06457	-1.21216	-0.73893	FBXW11	F-box/WD repeat-containing protein 11;F-box/WD repeat-containing protein 1A	Q9UKB1	0.377481	0.000179014	0.0210357	0.377481	sp|Q9UKB1|FBW1B_HUMAN F-box/WD repeat-containing protein 11 OS=Homo sapiens OX=9606 GN=FBXW11 PE=1 SV=1;sp|Q9Y297|FBW1A_HUMAN F-box/WD repeat-containing protein 1A OS=Homo sapiens OX=9606 GN=BTRC PE=1 SV=1	FUNCTION: Substrate recognition component of a SCF (SKP1-CUL1-F-box protein) E3 ubiquitin-protein ligase complex which mediates the ubiquitination and subsequent proteasomal degradation of target proteins. Probably recognizes and binds to phosphorylated target proteins. SCF(FBXW11) mediates the ubiquitination of phosphorylated CTNNB1 and participates in Wnt signaling regulation. SCF(FBXW11) media…	SUBCELLULAR LOCATION: Cytoplasm {ECO:0000250}. Nucleus {ECO:0000250}.	DISEASE: Neurodevelopmental, jaw, eye, and digital syndrome (NEDJED) [MIM:618914]: An autosomal dominant syndrome characterized by variable features including mild-to-severe developmental delay, speech delay, autistic and/or stereotypical behaviors, ocular anomalies, under- or overdeveloped jaw, and digital anomalies such as brachydactyly, clinodactyly, syndactyly, and contractures. {ECO:0000269|…	brain morphogenesis [GO:0048854]; establishment of mitotic spindle orientation [GO:0000132]; germ cell development [GO:0007281]; microtubule organizing center organization [GO:0031023]; negative regulation of transcription, DNA-templated [GO:0045892]; nuclear migration [GO:0007097]; positive regulation of circadian rhythm [GO:0042753]; positive regulation of proteolysis [GO:0045862]; positive reg…	dynein complex binding [GO:0070840]; microtubule plus-end binding [GO:0051010]; protein dimerization activity [GO:0046983]; ubiquitin-protein transferase activity [GO:0004842]	axon cytoplasm [GO:1904115]; centrosome [GO:0005813]; cytoplasmic microtubule [GO:0005881]; cytosol [GO:0005829]; kinetochore [GO:0000776]; microtubule associated complex [GO:0005875]; neuron projection [GO:0043005]; neuronal cell body [GO:0043025]; nuclear envelope [GO:0005635]; nucleus [GO:0005634]; SCF ubiquitin ligase complex [GO:0019005]; ubiquitin ligase complex [GO:0000151]	GO:0000132; GO:0000151; GO:0000209; GO:0000776; GO:0004842; GO:0005634; GO:0005635; GO:0005813; GO:0005829; GO:0005875; GO:0005881; GO:0006470; GO:0007097; GO:0007281; GO:0008090; GO:0016055; GO:0016567; GO:0019005; GO:0031023; GO:0031146; GO:0031648; GO:0042753; GO:0043005; GO:0043025; GO:0043161; GO:0045862; GO:0045892; GO:0045893; GO:0046983; GO:0047496; GO:0048511; GO:0048854; GO:0051010; GO:…	16.3613	16.2847	16.5085	16.2504	16.4342	16.0704	15.9917	15.9504	15.9187	16.0204
PLEKHA7_Q6IQ23	-0.135866	-1.35513	-1.17779	-1.04995	-0.524127	0.704543	0.159375	1.30726	0.990064	1.08163	PLEKHA7	Pleckstrin homology domain-containing family A member 7	Q6IQ23	0.505225	0.000186574	0.0210659	-0.505225	sp|Q6IQ23|PKHA7_HUMAN Pleckstrin homology domain-containing family A member 7 OS=Homo sapiens OX=9606 GN=PLEKHA7 PE=1 SV=2	FUNCTION: Required for zonula adherens biogenesis and maintenance (PubMed:19041755). Acts via its interaction with CAMSAP3, which anchors microtubules at their minus-ends to zonula adherens, leading to the recruitment of KIFC3 kinesin to the junctional site (PubMed:19041755). Mediates docking of ADAM10 to zonula adherens through a PDZD11-dependent interaction with the ADAM10-binding protein TSPAN…	SUBCELLULAR LOCATION: Cell junction, adherens junction {ECO:0000269|PubMed:19041755, ECO:0000269|PubMed:30463011}. Cytoplasm {ECO:0000269|PubMed:19041755}. Cytoplasm, cytoskeleton, microtubule organizing center, centrosome {ECO:0000269|PubMed:19041755}. Note=Localizes to zonula adherens, recruited via its interaction with CTNND1. {ECO:0000269|PubMed:19041755}.		cell-cell adhesion mediated by cadherin [GO:0044331]; epithelial cell-cell adhesion [GO:0090136]; pore complex assembly [GO:0046931]; zonula adherens maintenance [GO:0045218]	delta-catenin binding [GO:0070097]	cell junction [GO:0030054]; centrosome [GO:0005813]; cytosol [GO:0005829]; extracellular exosome [GO:0070062]; nucleoplasm [GO:0005654]; pore complex [GO:0046930]; zonula adherens [GO:0005915]	GO:0005654; GO:0005813; GO:0005829; GO:0005915; GO:0030054; GO:0044331; GO:0045218; GO:0046930; GO:0046931; GO:0070062; GO:0070097; GO:0090136	18.0301	17.6671	17.7199	17.758	17.9145	18.2803	18.118	18.4597	18.3653	18.3925
PMVK_Q15126	-1.07191	-1.45202	-1.1132	0.100769	-0.709684	0.931192	1.14239	0.680755	0.3984	1.0933	PMVK	Phosphomevalonate kinase	Q15126	0.498618	0.000188442	0.0210659	-0.498618	sp|Q15126|PMVK_HUMAN Phosphomevalonate kinase OS=Homo sapiens OX=9606 GN=PMVK PE=1 SV=3	FUNCTION: Catalyzes the reversible ATP-dependent phosphorylation of mevalonate 5-phosphate to produce mevalonate diphosphate and ADP, a key step in the mevalonic acid mediated biosynthesis of isopentenyl diphosphate and other polyisoprenoid metabolites. {ECO:0000269|PubMed:16519518, ECO:0000269|PubMed:17902708, ECO:0000269|PubMed:8663599, ECO:0000269|PubMed:9392419}.	SUBCELLULAR LOCATION: Cytoplasm, cytosol {ECO:0000269|PubMed:10191291, ECO:0000269|PubMed:27052676}.	DISEASE: Porokeratosis 1, multiple types (POROK1) [MIM:175800]: A form of porokeratosis, a disorder of faulty keratinization characterized by one or more atrophic patches surrounded by a distinctive hyperkeratotic ridgelike border called the cornoid lamella. The keratotic lesions can progress to overt cutaneous neoplasms, typically squamous cell carcinomas. Multiple clinical variants of porokerat…	cholesterol biosynthetic process [GO:0006695]; isopentenyl diphosphate biosynthetic process, mevalonate pathway [GO:0019287]; phosphorylation [GO:0016310]; response to cholesterol [GO:0070723]; sterol biosynthetic process [GO:0016126]	ATP binding [GO:0005524]; phosphomevalonate kinase activity [GO:0004631]	cytosol [GO:0005829]; extracellular exosome [GO:0070062]; membrane [GO:0016020]; peroxisome [GO:0005777]	GO:0004631; GO:0005524; GO:0005777; GO:0005829; GO:0006695; GO:0016020; GO:0016126; GO:0016310; GO:0019287; GO:0070062; GO:0070723	17.727	17.6154	17.7149	18.0713	17.8333	18.3151	18.3771	18.2416	18.1587	18.3627
TTC9_Q92623	1.08789	0.976127	1.21819	-0.170661	0.990035	-0.612133	-0.0670979	-1.24634	-0.900525	-1.27548	TTC9	Tetratricopeptide repeat protein 9A	Q92623	1.27628	0.000189931	0.0210659	1.27628	sp|Q92623|TTC9A_HUMAN Tetratricopeptide repeat protein 9A OS=Homo sapiens OX=9606 GN=TTC9 PE=1 SV=3				bone development [GO:0060348]			GO:0060348	13.603	13.5161	13.7044	12.624	13.5269	12.2806	12.7046	11.7872	12.0562	11.7645
SEPHS1_P49903	-0.944552	-0.74171	-1.1013	-1.21036	-0.355747	0.961722	0.732289	1.59589	0.232311	0.83146	SEPHS1	Selenide, water dikinase 1	P49903	0.391494	0.000197889	0.0210659	-0.391494	sp|P49903|SPS1_HUMAN Selenide, water dikinase 1 OS=Homo sapiens OX=9606 GN=SEPHS1 PE=1 SV=2	FUNCTION: Synthesizes selenophosphate from selenide and ATP. {ECO:0000269|PubMed:7665581}.	SUBCELLULAR LOCATION: [Isoform 1]: Cell membrane {ECO:0000269|PubMed:20471958}; Peripheral membrane protein {ECO:0000305}. Nucleus membrane {ECO:0000269|PubMed:20471958}; Peripheral membrane protein {ECO:0000305}.; SUBCELLULAR LOCATION: [Isoform 2]: Cytoplasm {ECO:0000269|PubMed:20471958}.; SUBCELLULAR LOCATION: [Isoform 3]: Cytoplasm {ECO:0000269|PubMed:20471958}.; SUBCELLULAR LOCATION: [Isoform…		phosphorylation [GO:0016310]; protein modification process [GO:0036211]; selenocysteine biosynthetic process [GO:0016260]	ATP binding [GO:0005524]; GTP binding [GO:0005525]; identical protein binding [GO:0042802]; metal ion binding [GO:0046872]; protein heterodimerization activity [GO:0046982]; protein homodimerization activity [GO:0042803]; selenide, water dikinase activity [GO:0004756]	cytoplasm [GO:0005737]; nuclear membrane [GO:0031965]; plasma membrane [GO:0005886]	GO:0004756; GO:0005524; GO:0005525; GO:0005737; GO:0005886; GO:0016260; GO:0016310; GO:0031965; GO:0036211; GO:0042802; GO:0042803; GO:0046872; GO:0046982	13.6544	13.7	13.6192	13.5946	13.7868	14.0829	14.0314	14.2255	13.919	14.0537
PM20D2_Q8IYS1	-0.586482	-0.868227	-1.06734	-1.51603	-0.142047	1.24001	0.154646	1.11161	1.18791	0.485949	PM20D2	Peptidase M20 domain-containing protein 2	Q8IYS1	0.605814	0.000201614	0.0210659	-0.605814	sp|Q8IYS1|P20D2_HUMAN Xaa-Arg dipeptidase OS=Homo sapiens OX=9606 GN=PM20D2 PE=1 SV=2	FUNCTION: Catalyzes the peptide bond hydrolysis in dipeptides having basic amino acids lysine, ornithine or arginine at C-terminus. Postulated to function in a metabolite repair mechanism by eliminating alternate dipeptide by-products formed during carnosine synthesis. {ECO:0000269|PubMed:24891507}.			proteolysis [GO:0006508]; regulation of cellular protein metabolic process [GO:0032268]	carboxypeptidase activity [GO:0004180]; dipeptidase activity [GO:0016805]; identical protein binding [GO:0042802]	nucleoplasm [GO:0005654]	GO:0004180; GO:0005654; GO:0006508; GO:0016805; GO:0032268; GO:0042802	14.6378	14.5357	14.4636	14.301	14.7989	15.2996	14.9064	15.2531	15.2807	15.0264
CHCHD2_Q9Y6H1	-1.09549	-1.37034	-1.00848	0.233895	-0.911578	0.594715	0.999019	0.440046	0.719577	1.39864	CHCHD2	Coiled-coil-helix-coiled-coil-helix domain-containing protein 2;Putative coiled-coil-helix-coiled-coil-helix domain-containing protein CHCHD2P9, mitochondrial	Q9Y6H1	0.69116	0.000204059	0.0210659	-0.69116	sp|Q9Y6H1|CHCH2_HUMAN Coiled-coil-helix-coiled-coil-helix domain-containing protein 2 OS=Homo sapiens OX=9606 GN=CHCHD2 PE=1 SV=1;sp|Q5T1J5|CHCH9_HUMAN Putative coiled-coil-helix-coiled-coil-helix domain-containing protein CHCHD2P9, mitochondrial OS=Homo s	FUNCTION: Transcription factor. Binds to the oxygen responsive element of COX4I2 and activates its transcription under hypoxia conditions (4% oxygen), as well as normoxia conditions (20% oxygen) (PubMed:23303788). {ECO:0000269|PubMed:23303788}.	SUBCELLULAR LOCATION: Nucleus {ECO:0000269|PubMed:23303788}. Mitochondrion {ECO:0000269|PubMed:25662902}. Mitochondrion intermembrane space {ECO:0000269|PubMed:25662902}. Note=Mainly localized in the intermembrane space. {ECO:0000269|PubMed:25662902}.	DISEASE: Parkinson disease 22 (PARK22) [MIM:616710]: An autosomal dominant form of Parkinson disease, a complex neurodegenerative disorder characterized by bradykinesia, resting tremor, muscular rigidity and postural instability, as well as by a clinically significant response to treatment with levodopa. The pathology involves the loss of dopaminergic neurons in the substantia nigra and the prese…	cellular response to oxidative stress [GO:0034599]; mitochondrion organization [GO:0007005]; positive regulation of mitochondrial ATP synthesis coupled electron transport [GO:1905448]; positive regulation of transcription by RNA polymerase II [GO:0045944]; regulation of cellular response to hypoxia [GO:1900037]	DNA-binding transcription factor binding [GO:0140297]; sequence-specific DNA binding [GO:0043565]	mitochondrial intermembrane space [GO:0005758]; mitochondrion [GO:0005739]; nucleus [GO:0005634]	GO:0005634; GO:0005739; GO:0005758; GO:0007005; GO:0034599; GO:0043565; GO:0045944; GO:0140297; GO:1900037; GO:1905448	15.055	14.9406	15.0912	15.6082	15.1315	15.7584	15.9266	15.694	15.8103	16.0929
IL1RAP_Q9NPH3	0.0495068	-0.34914	-0.926158	-0.952039	-1.89617	0.94095	0.523493	1.07452	0.876706	0.658328	IL1RAP	Interleukin-1 receptor accessory protein	Q9NPH3	2.48559	0.000204385	0.0210659	-2.48559	sp|Q9NPH3|IL1AP_HUMAN Interleukin-1 receptor accessory protein OS=Homo sapiens OX=9606 GN=IL1RAP PE=1 SV=2	FUNCTION: Coreceptor for IL1RL2 in the IL-36 signaling system (By similarity). Coreceptor with IL1R1 in the IL-1 signaling system. Associates with IL1R1 bound to IL1B to form the high affinity interleukin-1 receptor complex which mediates interleukin-1-dependent activation of NF-kappa-B and other pathways. Signaling involves the recruitment of adapter molecules such as TOLLIP, MYD88, and IRAK1 or…	SUBCELLULAR LOCATION: [Isoform 1]: Cell membrane; Single-pass type I membrane protein.; SUBCELLULAR LOCATION: [Isoform 2]: Secreted.; SUBCELLULAR LOCATION: [Isoform 3]: Secreted.		immune response [GO:0006955]; inflammatory response [GO:0006954]; innate immune response [GO:0045087]; positive regulation of interleukin-13 production [GO:0032736]; positive regulation of interleukin-4 production [GO:0032753]; positive regulation of interleukin-5 production [GO:0032754]; positive regulation of interleukin-6 production [GO:0032755]; positive regulation of NF-kappaB transcription …	interleukin-1 receptor activity [GO:0004908]; interleukin-1 receptor binding [GO:0005149]; interleukin-33 receptor activity [GO:0002114]; NAD(P)+ nucleosidase activity [GO:0050135]; NAD+ nucleotidase, cyclic ADP-ribose generating [GO:0061809]	extracellular region [GO:0005576]; glutamatergic synapse [GO:0098978]; integral component of plasma membrane [GO:0005887]; membrane [GO:0016020]; plasma membrane [GO:0005886]	GO:0002114; GO:0004908; GO:0005149; GO:0005576; GO:0005886; GO:0005887; GO:0006954; GO:0006955; GO:0016020; GO:0032736; GO:0032753; GO:0032754; GO:0032755; GO:0045087; GO:0050135; GO:0051092; GO:0051965; GO:0061809; GO:0065003; GO:0098978; GO:0099151; GO:0099545; GO:0099560; GO:1905606	16.2594	15.6514	14.7713	14.7318	13.2917	17.6191	16.9824	17.8229	17.5211	17.1881
COX17_Q14061	-1.2865	-1.00197	-1.13176	0.060095	-0.761711	0.286123	0.588114	0.745766	0.825031	1.67681	COX17	Cytochrome c oxidase copper chaperone	Q14061	0.846595	0.000206336	0.0210659	-0.846595	sp|Q14061|COX17_HUMAN Cytochrome c oxidase copper chaperone OS=Homo sapiens OX=9606 GN=COX17 PE=1 SV=2	FUNCTION: Copper metallochaperone essential for the assembly of the mitochondrial respiratory chain complex IV (CIV), also known as cytochrome c oxidase. Binds two copper ions and delivers them to the metallochaperone SCO1 which transports the copper ions to the Cu(A) site on the cytochrome c oxidase subunit II (MT-CO2/COX2). {ECO:0000269|PubMed:19393246}.	SUBCELLULAR LOCATION: Mitochondrion intermembrane space {ECO:0000269|PubMed:19393246}. Cytoplasm {ECO:0000269|PubMed:19393246}.		copper ion transport [GO:0006825]; generation of precursor metabolites and energy [GO:0006091]; mitochondrial cytochrome c oxidase assembly [GO:0033617]; positive regulation of cell population proliferation [GO:0008284]; positive regulation of cytochrome-c oxidase activity [GO:1904960]	copper chaperone activity [GO:0016531]; copper ion binding [GO:0005507]; cuprous ion binding [GO:1903136]; enzyme activator activity [GO:0008047]	cytoplasm [GO:0005737]; mitochondrial intermembrane space [GO:0005758]	GO:0005507; GO:0005737; GO:0005758; GO:0006091; GO:0006825; GO:0008047; GO:0008284; GO:0016531; GO:0033617; GO:1903136; GO:1904960	17.1433	17.2894	17.2228	17.8348	17.4128	17.9509	18.1059	18.1869	18.2276	18.6649
SGCG_Q13326	0.513346	1.46028	1.27676	0.27657	0.689385	-1.12314	-1.32937	-0.630246	-0.146187	-0.987398	SGCG	Gamma-sarcoglycan	Q13326	0.520873	0.000208606	0.0210659	0.520873	sp|Q13326|SGCG_HUMAN Gamma-sarcoglycan OS=Homo sapiens OX=9606 GN=SGCG PE=1 SV=4	FUNCTION: Component of the sarcoglycan complex, a subcomplex of the dystrophin-glycoprotein complex which forms a link between the F-actin cytoskeleton and the extracellular matrix.	SUBCELLULAR LOCATION: Cell membrane, sarcolemma {ECO:0000250}; Single-pass type II membrane protein {ECO:0000250}. Cytoplasm, cytoskeleton {ECO:0000250}.	DISEASE: Muscular dystrophy, limb-girdle, autosomal recessive 5 (LGMDR5) [MIM:253700]: An autosomal recessive degenerative myopathy characterized by rapidly progressive muscle wasting from early childhood with loss of independent ambulation around age 12 years, dystrophic pattern on muscle biopsy, absence of gamma-sarcoglycan and normal dystrophin immunostaining. {ECO:0000269|PubMed:10714584, ECO…	cardiac muscle tissue development [GO:0048738]; heart contraction [GO:0060047]; muscle organ development [GO:0007517]		cytoplasm [GO:0005737]; cytoskeleton [GO:0005856]; integral component of membrane [GO:0016021]; plasma membrane [GO:0005886]; sarcoglycan complex [GO:0016012]; sarcolemma [GO:0042383]	GO:0005737; GO:0005856; GO:0005886; GO:0007517; GO:0016012; GO:0016021; GO:0042383; GO:0048738; GO:0060047	19.1075	19.3999	19.3433	19.0344	19.1619	18.6021	18.5384	18.7543	18.9038	18.644
RCHY1_Q96PM5	-1.15427	-0.95866	-0.864793	-0.47273	-0.895858	0.470376	1.35379	1.55662	0.35715	0.60837	RCHY1	RING finger and CHY zinc finger domain-containing protein 1	Q96PM5	0.38782	0.000214822	0.0213599	-0.38782	sp|Q96PM5|ZN363_HUMAN RING finger and CHY zinc finger domain-containing protein 1 OS=Homo sapiens OX=9606 GN=RCHY1 PE=1 SV=1	FUNCTION: Mediates E3-dependent ubiquitination and proteasomal degradation of target proteins, including p53/TP53, P73, HDAC1 and CDKN1B. Preferentially acts on tetrameric p53/TP53. Monoubiquitinates the translesion DNA polymerase POLH. Contributes to the regulation of the cell cycle progression. Increases AR transcription factor activity. {ECO:0000269|PubMed:16914734, ECO:0000269|PubMed:17721809…	SUBCELLULAR LOCATION: Nucleus. Nucleus speckle. Cytoplasm.		error-free translesion synthesis [GO:0070987]; positive regulation of proteasomal ubiquitin-dependent protein catabolic process [GO:0032436]; positive regulation of protein ubiquitination [GO:0031398]; protein autoubiquitination [GO:0051865]; protein ubiquitination [GO:0016567]; ubiquitin-dependent protein catabolic process [GO:0006511]	p53 binding [GO:0002039]; protein homodimerization activity [GO:0042803]; ubiquitin protein ligase activity [GO:0061630]; ubiquitin-protein transferase activity [GO:0004842]; zinc ion binding [GO:0008270]	cytoplasm [GO:0005737]; cytosol [GO:0005829]; intracellular membrane-bounded organelle [GO:0043231]; nuclear speck [GO:0016607]; nucleoplasm [GO:0005654]; nucleus [GO:0005634]; ubiquitin ligase complex [GO:0000151]	GO:0000151; GO:0002039; GO:0004842; GO:0005634; GO:0005654; GO:0005737; GO:0005829; GO:0006511; GO:0008270; GO:0016567; GO:0016607; GO:0031398; GO:0032436; GO:0042803; GO:0043231; GO:0051865; GO:0061630; GO:0070987	14.9031	14.9468	14.9677	15.0552	14.9608	15.2655	15.4626	15.5079	15.2403	15.2963
RTN4_Q9NQC3	1.72044	0.975232	0.240704	0.136677	1.00444	-0.719787	-1.26665	-0.241293	-0.688271	-1.16149	RTN4	Reticulon-4	Q9NQC3	1.12275	0.000238989	0.0229369	1.12275	sp|Q9NQC3|RTN4_HUMAN Reticulon-4 OS=Homo sapiens OX=9606 GN=RTN4 PE=1 SV=2	FUNCTION: Required to induce the formation and stabilization of endoplasmic reticulum (ER) tubules (PubMed:27619977, PubMed:25612671, PubMed:24262037). They regulate membrane morphogenesis in the ER by promoting tubular ER production (PubMed:27619977, PubMed:25612671, PubMed:24262037, PubMed:27786289). They influence nuclear envelope expansion, nuclear pore complex formation and proper localizati…	SUBCELLULAR LOCATION: [Isoform A]: Endoplasmic reticulum membrane {ECO:0000269|PubMed:25612671, ECO:0000269|PubMed:26906412, ECO:0000269|PubMed:27619977, ECO:0000269|PubMed:27786289}; Multi-pass membrane protein {ECO:0000255}. Cell membrane; Multi-pass membrane protein {ECO:0000255}; Cytoplasmic side {ECO:0000269|PubMed:27786289}. Note=Anchored to the membrane of the endoplasmic reticulum (ER) th…		apoptotic process [GO:0006915]; axonal fasciculation [GO:0007413]; blastocyst formation [GO:0001825]; brain development [GO:0007420]; cardiac epithelial to mesenchymal transition [GO:0060317]; cell adhesion involved in sprouting angiogenesis [GO:0120078]; cell migration involved in vasculogenesis [GO:0035441]; cellular response to hypoxia [GO:0071456]; cellular sphingolipid homeostasis [GO:009015…	cadherin binding [GO:0045296]; protein homodimerization activity [GO:0042803]; RNA binding [GO:0003723]; ubiquitin protein ligase binding [GO:0031625]	anchoring junction [GO:0070161]; cell junction [GO:0030054]; endoplasmic reticulum [GO:0005783]; endoplasmic reticulum membrane [GO:0005789]; endoplasmic reticulum tubular network [GO:0071782]; endoplasmic reticulum tubular network membrane [GO:0098826]; integral component of endoplasmic reticulum membrane [GO:0030176]; neuron projection [GO:0043005]; nuclear envelope [GO:0005635]; plasma membran…	GO:0001825; GO:0002523; GO:0003723; GO:0005635; GO:0005783; GO:0005789; GO:0005886; GO:0006915; GO:0007029; GO:0007413; GO:0007420; GO:0010634; GO:0014069; GO:0021801; GO:0022009; GO:0030054; GO:0030176; GO:0030182; GO:0030308; GO:0030334; GO:0030517; GO:0031625; GO:0033601; GO:0034165; GO:0035022; GO:0035441; GO:0042803; GO:0042981; GO:0043005; GO:0045296; GO:0045766; GO:0050821; GO:0051292; GO:…	20.6573	20.1443	19.6387	19.5671	20.1644	18.9775	18.6011	19.3069	18.9992	18.6735
CACYBP_Q9HB71	-0.869846	-0.991931	-1.3428	-0.130556	-0.982731	0.986243	1.28762	1.05526	0.841131	0.147606	CACYBP	Calcyclin-binding protein	Q9HB71	0.394545	0.000239472	0.0229369	-0.394545	sp|Q9HB71|CYBP_HUMAN Calcyclin-binding protein OS=Homo sapiens OX=9606 GN=CACYBP PE=1 SV=2	FUNCTION: May be involved in calcium-dependent ubiquitination and subsequent proteasomal degradation of target proteins. Probably serves as a molecular bridge in ubiquitin E3 complexes. Participates in the ubiquitin-mediated degradation of beta-catenin (CTNNB1). {ECO:0000269|PubMed:16085652}.	SUBCELLULAR LOCATION: Nucleus {ECO:0000269|PubMed:12895292}. Cytoplasm {ECO:0000269|PubMed:12895292}. Note=Cytoplasmic at low calcium concentrations. In neuroblastoma cells, after a retinoic acid (RA) induction and calcium increase, it localizes in both the nucleus and cytoplasm. The nuclear fraction may be phosphorylated.		cellular response to leukemia inhibitory factor [GO:1990830]; heart development [GO:0007507]	protein domain specific binding [GO:0019904]; protein homodimerization activity [GO:0042803]; S100 protein binding [GO:0044548]; tubulin binding [GO:0015631]; ubiquitin protein ligase binding [GO:0031625]	beta-catenin destruction complex [GO:0030877]; cytosol [GO:0005829]; extracellular exosome [GO:0070062]; nuclear envelope lumen [GO:0005641]; nucleoplasm [GO:0005654]; nucleus [GO:0005634]; SCF ubiquitin ligase complex [GO:0019005]	GO:0005634; GO:0005641; GO:0005654; GO:0005829; GO:0007507; GO:0015631; GO:0019005; GO:0019904; GO:0030877; GO:0031625; GO:0042803; GO:0044548; GO:0070062; GO:1990830	18.3118	18.2839	18.2038	18.4807	18.286	18.7358	18.8046	18.7516	18.7027	18.5442
PLA2G12A_Q9BZM1	-1.56627	-1.05317	-0.918031	0.136961	-0.660283	0.278815	0.360104	1.28014	1.0555	1.08623	PLA2G12A	Group XIIA secretory phospholipase A2	Q9BZM1	1.5357	0.000242989	0.0229369	-1.5357	sp|Q9BZM1|PG12A_HUMAN Group XIIA secretory phospholipase A2 OS=Homo sapiens OX=9606 GN=PLA2G12A PE=1 SV=1	FUNCTION: PA2 catalyzes the calcium-dependent hydrolysis of the 2-acyl groups in 3-sn-phosphoglycerides. Does not exhibit detectable activity toward sn-2-arachidonoyl- or linoleoyl-phosphatidylcholine or -phosphatidylethanolamine. {ECO:0000269|PubMed:12522102}.	SUBCELLULAR LOCATION: Secreted {ECO:0000269|PubMed:12522102}. Cytoplasm {ECO:0000269|PubMed:12522102}.		arachidonic acid secretion [GO:0050482]; lipid catabolic process [GO:0016042]; phospholipid metabolic process [GO:0006644]	calcium ion binding [GO:0005509]; calcium-dependent phospholipase A2 activity [GO:0047498]; phospholipase A2 activity [GO:0004623]	cytoplasm [GO:0005737]; extracellular region [GO:0005576]	GO:0004623; GO:0005509; GO:0005576; GO:0005737; GO:0006644; GO:0016042; GO:0047498; GO:0050482	13.1711	13.6562	13.784	14.7814	14.0276	14.9155	14.9924	15.8622	15.6498	15.6789
MFAP5_Q13361	0.686032	1.64377	0.259063	0.167664	1.32332	-0.780513	-1.38579	-0.26777	-0.710204	-0.935571	MFAP5	Microfibrillar-associated protein 5	Q13361	1.00491	0.000248335	0.0229369	1.00491	sp|Q13361|MFAP5_HUMAN Microfibrillar-associated protein 5 OS=Homo sapiens OX=9606 GN=MFAP5 PE=1 SV=1	FUNCTION: May play a role in hematopoiesis. In the cardiovascular system, could regulate growth factors or participate in cell signaling in maintaining large vessel integrity (By similarity). Component of the elastin-associated microfibrils (PubMed:8557636). {ECO:0000250|UniProtKB:Q9QZJ6, ECO:0000269|PubMed:8557636}.	SUBCELLULAR LOCATION: Secreted, extracellular space, extracellular matrix.	DISEASE: Aortic aneurysm, familial thoracic 9 (AAT9) [MIM:616166]: A disease characterized by permanent dilation of the thoracic aorta usually due to degenerative changes in the aortic wall. It is primarily associated with a characteristic histologic appearance known as 'medial necrosis' or 'Erdheim cystic medial necrosis' in which there is degeneration and fragmentation of elastic fibers, loss o…	definitive hemopoiesis [GO:0060216]; embryonic eye morphogenesis [GO:0048048]; supramolecular fiber organization [GO:0097435]	extracellular matrix structural constituent [GO:0005201]	collagen-containing extracellular matrix [GO:0062023]; extracellular region [GO:0005576]; microfibril [GO:0001527]	GO:0001527; GO:0005201; GO:0005576; GO:0048048; GO:0060216; GO:0062023; GO:0097435	18.6672	19.2569	18.4043	18.348	19.0596	17.7641	17.3914	18.0798	17.8074	17.6686
CYBRD1_Q53TN4	0.498185	1.89643	0.855354	0.0642638	0.818128	-0.90811	-1.17354	-0.538076	-0.995958	-0.516679	CYBRD1	Cytochrome b reductase 1	Q53TN4	0.659066	0.000248426	0.0229369	0.659066	sp|Q53TN4|CYBR1_HUMAN Plasma membrane ascorbate-dependent reductase CYBRD1 OS=Homo sapiens OX=9606 GN=CYBRD1 PE=1 SV=1	FUNCTION: Plasma membrane reductase that uses cytoplasmic ascorbate as an electron donor to reduce extracellular Fe(3+) into Fe(2+) (PubMed:30272000). Probably functions in dietary iron absorption at the brush border of duodenal enterocytes by producing Fe(2+), the divalent form of iron that can be transported into enterocytes (PubMed:30272000). It is also able to reduce extracellular monodehydro…	SUBCELLULAR LOCATION: Cell membrane {ECO:0000269|PubMed:17068337}; Multi-pass membrane protein {ECO:0000269|PubMed:30272000}. Apical cell membrane {ECO:0000305|PubMed:12949720}; Multi-pass membrane protein {ECO:0000269|PubMed:30272000}. Note=Localized at the brush border of duodenal cells. {ECO:0000269|PubMed:12949720}.		ascorbate homeostasis [GO:0140576]; cellular iron ion homeostasis [GO:0006879]; iron ion homeostasis [GO:0055072]; reductive iron assimilation [GO:0033215]; response to iron ion [GO:0010039]	identical protein binding [GO:0042802]; metal ion binding [GO:0046872]; oxidoreductase activity [GO:0016491]; oxidoreductase activity, acting on metal ions [GO:0016722]; transmembrane ascorbate ferrireductase activity [GO:0140571]; transmembrane monodehydroascorbate reductase activity [GO:0140575]	apical plasma membrane [GO:0016324]; brush border membrane [GO:0031526]; extracellular exosome [GO:0070062]; integral component of membrane [GO:0016021]; lysosomal membrane [GO:0005765]; plasma membrane [GO:0005886]	GO:0005765; GO:0005886; GO:0006879; GO:0010039; GO:0016021; GO:0016324; GO:0016491; GO:0016722; GO:0031526; GO:0033215; GO:0042802; GO:0046872; GO:0055072; GO:0070062; GO:0140571; GO:0140575; GO:0140576	15.9597	16.5172	16.1021	15.7867	16.0873	15.399	15.2932	15.5465	15.364	15.5551
C5orf22_Q49AR2	-1.36027	-0.88229	-0.538638	-0.188057	-1.23084	1.38311	1.1301	1.01493	0.541894	0.130061	C5orf22	UPF0489 protein C5orf22	Q49AR2	0.496424	0.000258042	0.0234891	-0.496424	sp|Q49AR2|CE022_HUMAN UPF0489 protein C5orf22 OS=Homo sapiens OX=9606 GN=C5orf22 PE=1 SV=2								13.5467	13.688	13.7895	13.8931	13.585	14.3574	14.2826	14.2486	14.1088	13.9871
ITGB4_P16144	0.784158	1.67519	0.404326	0.891302	0.408478	-1.25464	-1.12091	-1.02647	-0.00654955	-0.75488	ITGB4	Integrin beta-4	P16144	0.541195	0.000274135	0.0238572	0.541195	sp|P16144|ITB4_HUMAN Integrin beta-4 OS=Homo sapiens OX=9606 GN=ITGB4 PE=1 SV=5	FUNCTION: Integrin alpha-6/beta-4 is a receptor for laminin. Plays a critical structural role in the hemidesmosome of epithelial cells. Is required for the regulation of keratinocyte polarity and motility. ITGA6:ITGB4 binds to NRG1 (via EGF domain) and this binding is essential for NRG1-ERBB signaling (PubMed:20682778). ITGA6:ITGB4 binds to IGF1 and this binding is essential for IGF1 signaling (P…	SUBCELLULAR LOCATION: Cell membrane; Single-pass type I membrane protein. Cell membrane; Lipid-anchor. Cell junction, hemidesmosome. Note=Colocalizes with DST at the leading edge of migrating keratinocytes.	DISEASE: Epidermolysis bullosa, junctional 5A, intermediate (JEB5A) [MIM:619816]: A form of epidermolysis bullosa, a genodermatosis characterized by recurrent blistering, fragility of the skin and mucosal epithelia, and erosions caused by minor mechanical trauma. JEB5A is an autosomal recessive, intermediate form in which blistering lesions occur between the epidermis and the dermis at the lamina…	autophagy [GO:0006914]; cell adhesion [GO:0007155]; cell adhesion mediated by integrin [GO:0033627]; cell migration [GO:0016477]; cell motility [GO:0048870]; cell-matrix adhesion [GO:0007160]; filopodium assembly [GO:0046847]; hemidesmosome assembly [GO:0031581]; integrin-mediated signaling pathway [GO:0007229]; mesodermal cell differentiation [GO:0048333]; nail development [GO:0035878]; peripher…	G protein-coupled receptor binding [GO:0001664]; integrin binding [GO:0005178]	basal plasma membrane [GO:0009925]; basement membrane [GO:0005604]; cell junction [GO:0030054]; cell leading edge [GO:0031252]; cell surface [GO:0009986]; extracellular exosome [GO:0070062]; focal adhesion [GO:0005925]; hemidesmosome [GO:0030056]; integrin complex [GO:0008305]; nuclear membrane [GO:0031965]; nucleolus [GO:0005730]; plasma membrane [GO:0005886]; receptor complex [GO:0043235]	GO:0001664; GO:0005178; GO:0005604; GO:0005730; GO:0005886; GO:0005925; GO:0006914; GO:0007155; GO:0007160; GO:0007229; GO:0008305; GO:0009611; GO:0009925; GO:0009986; GO:0016477; GO:0030054; GO:0030056; GO:0031252; GO:0031581; GO:0031965; GO:0032290; GO:0033627; GO:0035878; GO:0043235; GO:0043589; GO:0046847; GO:0048333; GO:0048870; GO:0061450; GO:0070062	17.3561	17.6457	17.2327	17.391	17.2341	16.6936	16.7371	16.7677	17.0992	16.856
DTYMK_P23919	1.16721	1.33987	0.806984	-0.517	1.25837	-1.00077	-0.701379	-0.801191	-0.791674	-0.760417	DTYMK	Thymidylate kinase	P23919	1.1657	0.000274994	0.0238572	1.1657	sp|P23919|KTHY_HUMAN Thymidylate kinase OS=Homo sapiens OX=9606 GN=DTYMK PE=1 SV=4	FUNCTION: Catalyzes the phosphorylation of thymidine monophosphate (dTMP) to thymidine diphosphate (dTDP), the immediate precursor for the DNA building block dTTP, with ATP as the preferred phosphoryl donor in the presence of Mg(2+). {ECO:0000269|PubMed:12614151, ECO:0000269|PubMed:2017365, ECO:0000269|PubMed:8024690, ECO:0000305|PubMed:18469}.			cellular response to growth factor stimulus [GO:0071363]; dTDP biosynthetic process [GO:0006233]; dTTP biosynthetic process [GO:0006235]; dUDP biosynthetic process [GO:0006227]; phosphorylation [GO:0016310]; thymidine biosynthetic process [GO:0046105]	ATP binding [GO:0005524]; nucleoside diphosphate kinase activity [GO:0004550]; thymidylate kinase activity [GO:0004798]; uridylate kinase activity [GO:0009041]	cytoplasm [GO:0005737]; cytosol [GO:0005829]; mitochondrion [GO:0005739]; nucleus [GO:0005634]	GO:0004550; GO:0004798; GO:0005524; GO:0005634; GO:0005737; GO:0005739; GO:0005829; GO:0006227; GO:0006233; GO:0006235; GO:0009041; GO:0016310; GO:0046105; GO:0071363	18.7783	18.9023	18.5194	17.568	18.8438	17.2204	17.4355	17.3638	17.3706	17.3931
FCGR3A_P08637	-0.0127028	-1.10328	-1.37178	-0.512101	-1.08582	0.695469	0.585253	1.08074	0.162508	1.56172	FCGR3A	Low affinity immunoglobulin gamma Fc region receptor III-A;Low affinity immunoglobulin gamma Fc region receptor III-B	P08637	0.810656	0.000275795	0.0238572	-0.810656	sp|P08637|FCG3A_HUMAN Low affinity immunoglobulin gamma Fc region receptor III-A OS=Homo sapiens OX=9606 GN=FCGR3A PE=1 SV=2;sp|O75015|FCG3B_HUMAN Low affinity immunoglobulin gamma Fc region receptor III-B OS=Homo sapiens OX=9606 GN=FCGR3B PE=1 SV=2	FUNCTION: Receptor for the invariable Fc fragment of immunoglobulin gamma (IgG). Optimally activated upon binding of clustered antigen-IgG complexes displayed on cell surfaces, triggers lysis of antibody-coated cells, a process known as antibody-dependent cellular cytotoxicity (ADCC). Does not bind free monomeric IgG, thus avoiding inappropriate effector cell activation in the absence of antigeni…	SUBCELLULAR LOCATION: Cell membrane {ECO:0000269|PubMed:1825220, ECO:0000269|PubMed:23006327, ECO:0000269|PubMed:24337742, ECO:0000269|PubMed:2532305, ECO:0000269|PubMed:28652325, ECO:0000269|PubMed:29967280}; Single-pass type I membrane protein {ECO:0000255}. Secreted {ECO:0000269|PubMed:25816339, ECO:0000269|PubMed:29967280}. Note=Exists also as a soluble receptor. {ECO:0000269|PubMed:25816339,…	DISEASE: Immunodeficiency 20 (IMD20) [MIM:615707]: A rare autosomal recessive primary immunodeficiency characterized by functional deficiency of NK cells. Affected individuals typically present with severe herpes viral infections, particularly Epstein Barr virus (EBV), and human papillomavirus (HPV). {ECO:0000269|PubMed:23006327, ECO:0000269|PubMed:8608639, ECO:0000269|PubMed:8609432, ECO:0000269…	antibody-dependent cellular cytotoxicity [GO:0001788]; calcium-mediated signaling [GO:0019722]; cell surface receptor signaling pathway [GO:0007166]; Fc-gamma receptor signaling pathway [GO:0038094]; immune response [GO:0006955]; macrophage activation [GO:0042116]; natural killer cell activation [GO:0030101]; natural killer cell degranulation [GO:0043320]; natural killer cell mediated cytotoxicit…	IgG binding [GO:0019864]; immune receptor activity [GO:0140375]; low-affinity IgG receptor activity [GO:0019772]; transmembrane signaling receptor activity [GO:0004888]	external side of plasma membrane [GO:0009897]; extracellular exosome [GO:0070062]; extracellular space [GO:0005615]; Fc-gamma receptor III complex [GO:0033001]; integral component of plasma membrane [GO:0005887]; plasma membrane [GO:0005886]	GO:0001788; GO:0004888; GO:0005615; GO:0005886; GO:0005887; GO:0006955; GO:0007166; GO:0009897; GO:0014065; GO:0019722; GO:0019772; GO:0019864; GO:0030101; GO:0032760; GO:0032819; GO:0033001; GO:0038094; GO:0042116; GO:0042267; GO:0043320; GO:0050776; GO:0070062; GO:0140375	14.4559	13.915	13.7818	14.2082	13.9236	14.8072	14.7526	14.9983	14.5429	15.2369
CD2BP2_O95400	-1.47663	-1.24296	-0.990913	-0.0949585	-0.290108	0.62185	0.926479	0.125415	1.15552	1.2663	CD2BP2	CD2 antigen cytoplasmic tail-binding protein 2	O95400	0.748443	0.000276852	0.0238572	-0.748443	sp|O95400|CD2B2_HUMAN CD2 antigen cytoplasmic tail-binding protein 2 OS=Homo sapiens OX=9606 GN=CD2BP2 PE=1 SV=1	FUNCTION: Involved in pre-mRNA splicing as component of the U5 snRNP complex that is involved in spliceosome assembly. {ECO:0000269|PubMed:15840814}.	SUBCELLULAR LOCATION: Cytoplasm. Nucleus. Note=Predominantly nuclear.		spliceosomal tri-snRNP complex assembly [GO:0000244]	ribonucleoprotein complex binding [GO:0043021]	cytoplasm [GO:0005737]; cytosol [GO:0005829]; fibrillar center [GO:0001650]; nuclear speck [GO:0016607]; nucleoplasm [GO:0005654]; nucleus [GO:0005634]; U5 snRNP [GO:0005682]	GO:0000244; GO:0001650; GO:0005634; GO:0005654; GO:0005682; GO:0005737; GO:0005829; GO:0016607; GO:0043021	14.6682	14.7749	14.8901	15.2994	15.2103	15.6269	15.7661	15.4001	15.8707	15.9213
DMXL2_Q8TDJ6	-0.864043	0.146721	-0.56066	-1.29032	-1.48859	1.07216	0.558547	0.175997	1.04588	1.20432	DMXL2	DmX-like protein 2	Q8TDJ6	1.03546	0.000286942	0.024125	-1.03546	sp|Q8TDJ6|DMXL2_HUMAN DmX-like protein 2 OS=Homo sapiens OX=9606 GN=DMXL2 PE=1 SV=2	FUNCTION: May serve as a scaffold protein for MADD and RAB3GA on synaptic vesicles (PubMed:11809763). Plays a role in the brain as a key controller of neuronal and endocrine homeostatic processes (By similarity). {ECO:0000250|UniProtKB:Q8BPN8, ECO:0000269|PubMed:11809763}.	SUBCELLULAR LOCATION: Cytoplasmic vesicle, secretory vesicle, synaptic vesicle membrane {ECO:0000269|PubMed:11809763}; Peripheral membrane protein {ECO:0000269|PubMed:11809763}. Cytoplasmic vesicle, secretory vesicle, neuronal dense core vesicle {ECO:0000250|UniProtKB:Q8BPN8}. Note=The external layer of the inferior boundary for the hypothalamus part of the human brain (the so called median emine…	DISEASE: Polyendocrine-polyneuropathy syndrome (PEPNS) [MIM:616113]: A progressive endocrine and neurodevelopmental disorder manifesting early in childhood with growth retardation and recurrent episodes of profound asymptomatic hypoglycemia. PEPNS is characterized by central hypothyroidism, hypogonadotropic hypogonadism, incomplete puberty, progressive non-autoimmune insulin-dependent diabetes me…	vacuolar acidification [GO:0007035]	small GTPase binding [GO:0031267]	anchoring junction [GO:0070161]; extracellular space [GO:0005615]; neuronal dense core vesicle [GO:0098992]; RAVE complex [GO:0043291]; synaptic vesicle [GO:0008021]; synaptic vesicle membrane [GO:0030672]	GO:0005615; GO:0007035; GO:0008021; GO:0030672; GO:0031267; GO:0043291; GO:0070161; GO:0098992	12.0354	12.6803	12.229	11.7634	11.6369	13.2708	12.9431	12.699	13.2541	13.3552
SDC2_P34741	1.39951	1.02176	0.778473	-0.465952	1.32166	-0.894792	-0.84946	-0.8639	-0.487473	-0.959828	SDC2	Syndecan-2	P34741	1.05319	0.000287424	0.024125	1.05319	sp|P34741|SDC2_HUMAN Syndecan-2 OS=Homo sapiens OX=9606 GN=SDC2 PE=1 SV=2	FUNCTION: Cell surface proteoglycan that bears heparan sulfate. Regulates dendritic arbor morphogenesis (By similarity). {ECO:0000250}.	SUBCELLULAR LOCATION: Membrane; Single-pass type I membrane protein.		cell migration [GO:0016477]; dendrite morphogenesis [GO:0048813]; regulation of dendrite morphogenesis [GO:0048814]	identical protein binding [GO:0042802]; PDZ domain binding [GO:0030165]	cell surface [GO:0009986]; collagen-containing extracellular matrix [GO:0062023]; endoplasmic reticulum lumen [GO:0005788]; Golgi lumen [GO:0005796]; integral component of membrane [GO:0016021]; lysosomal lumen [GO:0043202]; plasma membrane [GO:0005886]	GO:0005788; GO:0005796; GO:0005886; GO:0009986; GO:0016021; GO:0016477; GO:0030165; GO:0042802; GO:0043202; GO:0048813; GO:0048814; GO:0062023	17.3773	17.132	16.9741	16.1662	17.3267	15.8877	15.9172	15.9078	16.1522	15.8455
AEBP1_Q8IUX7	0.925362	1.44303	1.02563	-0.538451	1.17923	-0.904289	-0.81622	-0.771888	-0.598504	-0.943904	AEBP1	Adipocyte enhancer-binding protein 1	Q8IUX7	1.54903	0.00029158	0.02416	1.54903	sp|Q8IUX7|AEBP1_HUMAN Adipocyte enhancer-binding protein 1 OS=Homo sapiens OX=9606 GN=AEBP1 PE=1 SV=1	FUNCTION: [Isoform 1]: As a positive regulator of collagen fibrillogenesis, it is probably involved in the organization and remodeling of the extracellular matrix. {ECO:0000269|PubMed:29606302}.; FUNCTION: [Isoform 2]: May positively regulate MAP-kinase activity in adipocytes, leading to enhanced adipocyte proliferation and reduced adipocyte differentiation. May also positively regulate NF-kappa-…	SUBCELLULAR LOCATION: [Isoform 1]: Secreted {ECO:0000250|UniProtKB:Q640N1}.; SUBCELLULAR LOCATION: [Isoform 2]: Cytoplasm {ECO:0000250|UniProtKB:Q640N1}. Nucleus {ECO:0000250|UniProtKB:Q640N1}.	DISEASE: Ehlers-Danlos syndrome, classic-like, 2 (EDSCLL2) [MIM:618000]: A variant form of Ehlers-Danlos syndrome, a connective tissue disorder. EDSCLL2 patients show severe joint and skin laxity, osteoporosis affecting the hips and spine, osteoarthritis, soft redundant skin that can be acrogeria-like, delayed wound healing with abnormal atrophic scarring, and shoulder, hip, knee, and ankle dislo…	negative regulation of transcription by RNA polymerase II [GO:0000122]; proteolysis [GO:0006508]; regulation of collagen fibril organization [GO:1904026]	calmodulin binding [GO:0005516]; carboxypeptidase activity [GO:0004180]; collagen binding [GO:0005518]; DNA-binding transcription repressor activity, RNA polymerase II-specific [GO:0001227]; RNA polymerase II transcription regulatory region sequence-specific DNA binding [GO:0000977]; zinc ion binding [GO:0008270]	collagen-containing extracellular matrix [GO:0062023]; cytoplasm [GO:0005737]; extracellular exosome [GO:0070062]; extracellular region [GO:0005576]; extracellular space [GO:0005615]; nucleus [GO:0005634]	GO:0000122; GO:0000977; GO:0001227; GO:0004180; GO:0005516; GO:0005518; GO:0005576; GO:0005615; GO:0005634; GO:0005737; GO:0006508; GO:0008270; GO:0062023; GO:0070062; GO:1904026	19.0853	19.5822	19.1816	17.6804	19.329	17.3293	17.4138	17.4563	17.6228	17.2912
TINAGL1_Q9GZM7	1.83332	0.842408	0.75317	0.0350689	0.650645	-1.31462	-0.747306	-0.337096	-0.676832	-1.03876	TINAGL1	Tubulointerstitial nephritis antigen-like	Q9GZM7	0.612558	0.000308094	0.0252052	0.612558	sp|Q9GZM7|TINAL_HUMAN Tubulointerstitial nephritis antigen-like OS=Homo sapiens OX=9606 GN=TINAGL1 PE=1 SV=1	FUNCTION: May be implicated in the adrenocortical zonation and in mechanisms for repressing the CYP11B1 gene expression in adrenocortical cells. This is a non catalytic peptidase C1 family protein (By similarity). {ECO:0000250}.	SUBCELLULAR LOCATION: Secreted {ECO:0000269|PubMed:10799322, ECO:0000269|PubMed:11170462}.		endosomal transport [GO:0016197]	extracellular matrix structural constituent [GO:0005201]; laminin binding [GO:0043236]	collagen-containing extracellular matrix [GO:0062023]; extracellular exosome [GO:0070062]; extracellular region [GO:0005576]; extracellular space [GO:0005615]; lysosome [GO:0005764]	GO:0005201; GO:0005576; GO:0005615; GO:0005764; GO:0016197; GO:0043236; GO:0062023; GO:0070062	20.8148	20.446	20.4128	20.1455	20.3746	19.6432	19.8543	20.007	19.8806	19.7459
AKAP8L_Q9ULX6	-1.56083	-0.987125	-0.670938	-0.719635	-0.280207	1.18718	0.288173	1.36724	1.03026	0.345887	AKAP8L	A-kinase anchor protein 8-like	Q9ULX6	0.433505	0.000321822	0.0256967	-0.433505	sp|Q9ULX6|AKP8L_HUMAN A-kinase anchor protein 8-like OS=Homo sapiens OX=9606 GN=AKAP8L PE=1 SV=4	FUNCTION: Could play a role in constitutive transport element (CTE)-mediated gene expression by association with DHX9. Increases CTE-dependent nuclear unspliced mRNA export (PubMed:10748171, PubMed:11402034). Proposed to target PRKACA to the nucleus but does not seem to be implicated in the binding of regulatory subunit II of PKA (PubMed:10761695, PubMed:11884601). May be involved in nuclear enve…	SUBCELLULAR LOCATION: Nucleus {ECO:0000269|PubMed:10748171, ECO:0000269|PubMed:10761695}. Nucleus matrix {ECO:0000269|PubMed:11034899, ECO:0000269|PubMed:16391387}. Nucleus speckle {ECO:0000269|PubMed:17594903}. Nucleus, PML body {ECO:0000269|PubMed:11884601}. Cytoplasm {ECO:0000269|PubMed:10748171}. Note=Colocalizes with PRPF40A in the nuclear matrix (PubMed:16391387). Nuclear at steady state bu…		cell cycle G2/M phase transition [GO:0044839]; mitotic chromosome condensation [GO:0007076]; mRNA processing [GO:0006397]; nuclear membrane disassembly [GO:0051081]; positive regulation of histone deacetylation [GO:0031065]; positive regulation of transcription by RNA polymerase II [GO:0045944]; regulation of mRNA export from nucleus [GO:0010793]; RNA splicing [GO:0008380]	DEAD/H-box RNA helicase binding [GO:0017151]; DNA binding [GO:0003677]; histone deacetylase binding [GO:0042826]; lamin binding [GO:0005521]; metal ion binding [GO:0046872]; protein kinase A regulatory subunit binding [GO:0034237]; RNA binding [GO:0003723]	chromatin [GO:0000785]; cytoplasm [GO:0005737]; nuclear matrix [GO:0016363]; nuclear speck [GO:0016607]; nucleus [GO:0005634]; PML body [GO:0016605]; ribonucleoprotein complex [GO:1990904]	GO:0000785; GO:0003677; GO:0003723; GO:0005521; GO:0005634; GO:0005737; GO:0006397; GO:0007076; GO:0008380; GO:0010793; GO:0016363; GO:0016605; GO:0016607; GO:0017151; GO:0031065; GO:0034237; GO:0042826; GO:0044839; GO:0045944; GO:0046872; GO:0051081; GO:1990904	14.4483	14.5957	14.6769	14.6644	14.7773	15.1543	14.9233	15.2005	15.114	14.9381
SERPINA1_P01009	-0.549957	-1.16243	-1.57567	0.0124079	-0.760143	1.1596	0.811446	0.953625	-0.0591726	1.17029	SERPINA1	Alpha-1-antitrypsin;Short peptide from AAT	P01009	1.10153	0.000322054	0.0256967	-1.10153	sp|P01009|A1AT_HUMAN Alpha-1-antitrypsin OS=Homo sapiens OX=9606 GN=SERPINA1 PE=1 SV=3	FUNCTION: Inhibitor of serine proteases. Its primary target is elastase, but it also has a moderate affinity for plasmin and thrombin. Irreversibly inhibits trypsin, chymotrypsin and plasminogen activator. The aberrant form inhibits insulin-induced NO synthesis in platelets, decreases coagulation time and has proteolytic activity against insulin and plasmin.; FUNCTION: [Short peptide from AAT]: R…	SUBCELLULAR LOCATION: Secreted. Endoplasmic reticulum. Note=The S and Z allele are not secreted effectively and accumulate intracellularly in the endoplasmic reticulum.; SUBCELLULAR LOCATION: [Short peptide from AAT]: Secreted, extracellular space, extracellular matrix.	DISEASE: Alpha-1-antitrypsin deficiency (A1ATD) [MIM:613490]: A disorder whose most common manifestation is emphysema, which becomes evident by the third to fourth decade. A less common manifestation of the deficiency is liver disease, which occurs in children and adults, and may result in cirrhosis and liver failure. Environmental factors, particularly cigarette smoking, greatly increase the ris…	acute-phase response [GO:0006953]; blood coagulation [GO:0007596]; negative regulation of endopeptidase activity [GO:0010951]	identical protein binding [GO:0042802]; protease binding [GO:0002020]; serine-type endopeptidase inhibitor activity [GO:0004867]	collagen-containing extracellular matrix [GO:0062023]; COPII-coated ER to Golgi transport vesicle [GO:0030134]; endoplasmic reticulum [GO:0005783]; endoplasmic reticulum lumen [GO:0005788]; endoplasmic reticulum-Golgi intermediate compartment membrane [GO:0033116]; extracellular exosome [GO:0070062]; extracellular region [GO:0005576]; extracellular space [GO:0005615]; ficolin-1-rich granule lumen…	GO:0002020; GO:0004867; GO:0005576; GO:0005615; GO:0005783; GO:0005788; GO:0005794; GO:0006953; GO:0007596; GO:0010951; GO:0030134; GO:0031093; GO:0033116; GO:0042802; GO:0043231; GO:0062023; GO:0070062; GO:1904813	21.3527	20.9348	20.6528	21.7365	21.2093	22.5193	22.2817	22.3787	21.6876	22.5266
COL22A1_Q8NFW1	0.551272	1.17231	1.41922	-0.300187	1.17351	-0.731457	-1.07116	-0.280557	-1.29133	-0.641627	COL22A1	Collagen alpha-1(XXII) chain	Q8NFW1	1.48932	0.000334364	0.0263536	1.48932	sp|Q8NFW1|COMA1_HUMAN Collagen alpha-1(XXII) chain OS=Homo sapiens OX=9606 GN=COL22A1 PE=2 SV=2	FUNCTION: Acts as a cell adhesion ligand for skin epithelial cells and fibroblasts.	SUBCELLULAR LOCATION: Secreted, extracellular space, extracellular matrix. Cytoplasm {ECO:0000250}.		angiogenesis [GO:0001525]; endothelial cell morphogenesis [GO:0001886]; extracellular matrix organization [GO:0030198]	extracellular matrix structural constituent [GO:0005201]	collagen trimer [GO:0005581]; endoplasmic reticulum lumen [GO:0005788]; extracellular matrix [GO:0031012]; extracellular region [GO:0005576]; extracellular space [GO:0005615]	GO:0001525; GO:0001886; GO:0005201; GO:0005576; GO:0005581; GO:0005615; GO:0005788; GO:0030198; GO:0031012	12.1879	12.7637	12.9926	11.3985	12.7648	10.9987	10.6838	11.4167	10.4796	11.082
HMCN2_Q8NDA2	0.779604	2	0.637864	0.0771123	0.528829	-0.840672	-1.02408	-0.925797	-0.216748	-1.01739	HMCN2	Hemicentin-2	Q8NDA2	1.1708	0.000338727	0.0263758	1.1708	sp|Q8NDA2|HMCN2_HUMAN Hemicentin-2 OS=Homo sapiens OX=9606 GN=HMCN2 PE=2 SV=3		SUBCELLULAR LOCATION: Secreted, extracellular space, extracellular matrix {ECO:0000250|UniProtKB:A2AJ76}. Cleavage furrow {ECO:0000250|UniProtKB:A2AJ76}. Note=The antibody used to determine subcellular location does not distinguish between HMCN1 and HMCN2. {ECO:0000250|UniProtKB:A2AJ76}.		response to stimulus [GO:0050896]	calcium ion binding [GO:0005509]	cleavage furrow [GO:0032154]; collagen-containing extracellular matrix [GO:0062023]; extracellular matrix [GO:0031012]; extracellular space [GO:0005615]	GO:0005509; GO:0005615; GO:0031012; GO:0032154; GO:0050896; GO:0062023	16.5236	17.412	16.4205	16.0127	16.3412	15.3452	15.2118	15.2833	15.799	15.2167
MYO1D_O94832	0.753291	1.68818	0.513304	-0.317323	1.38013	-0.693064	-0.72258	-0.678062	-0.942046	-0.98183	MYO1D	Unconventional myosin-Id	O94832	1.04539	0.000371771	0.028279	1.04539	sp|O94832|MYO1D_HUMAN Unconventional myosin-Id OS=Homo sapiens OX=9606 GN=MYO1D PE=1 SV=2	FUNCTION: Unconventional myosin that functions as actin-based motor protein with ATPase activity (By similarity). Plays a role in endosomal protein trafficking, and especially in the transfer of cargo proteins from early to recycling endosomes (By similarity). Required for normal planar cell polarity in ciliated tracheal cells, for normal rotational polarity of cilia, and for coordinated, unidire…	SUBCELLULAR LOCATION: Cytoplasm {ECO:0000250|UniProtKB:Q63357}. Perikaryon {ECO:0000250|UniProtKB:Q63357}. Cell projection, dendrite {ECO:0000250|UniProtKB:Q63357}. Early endosome {ECO:0000250|UniProtKB:F1PRN2}. Cytoplasm, cell cortex {ECO:0000250|UniProtKB:Q63357}. Note=Colocalizes with the actin cytoskeleton in the cell cortex close to the apical cell membrane. Colocalizes with cytoplasmic punc…		actin filament organization [GO:0007015]; cellular localization [GO:0051641]; early endosome to recycling endosome transport [GO:0061502]; protein transport [GO:0015031]; vesicle transport along actin filament [GO:0030050]	actin filament binding [GO:0051015]; ATP binding [GO:0005524]; calcium-dependent protein binding [GO:0048306]; calmodulin binding [GO:0005516]; microfilament motor activity [GO:0000146]; protein domain specific binding [GO:0019904]	actin cytoskeleton [GO:0015629]; apical dendrite [GO:0097440]; axolemma [GO:0030673]; axon [GO:0030424]; basolateral plasma membrane [GO:0016323]; brush border [GO:0005903]; cell cortex [GO:0005938]; cytoplasmic vesicle [GO:0031410]; cytosol [GO:0005829]; early endosome [GO:0005769]; endosome [GO:0005768]; extracellular exosome [GO:0070062]; microvillus [GO:0005902]; myelin sheath [GO:0043209]; m…	GO:0000146; GO:0005516; GO:0005524; GO:0005768; GO:0005769; GO:0005790; GO:0005829; GO:0005886; GO:0005902; GO:0005903; GO:0005938; GO:0007015; GO:0015031; GO:0015629; GO:0016323; GO:0016459; GO:0019904; GO:0030050; GO:0030424; GO:0030673; GO:0031410; GO:0043005; GO:0043025; GO:0043204; GO:0043209; GO:0048306; GO:0051015; GO:0051641; GO:0061502; GO:0070062; GO:0097440	18.911	19.5192	18.7549	18.2146	19.3188	17.9701	17.9509	17.9799	17.8082	17.7823
IMPA2_O14732	-1.28743	-1.2712	-0.593464	0.165155	-1.05506	1.10432	0.754323	1.15248	-0.0257983	1.05667	IMPA2	Inositol monophosphatase 2	O14732	0.800335	0.000371919	0.028279	-0.800335	sp|O14732|IMPA2_HUMAN Inositol monophosphatase 2 OS=Homo sapiens OX=9606 GN=IMPA2 PE=1 SV=1	FUNCTION: Can use myo-inositol monophosphates, scylloinositol 1,4-diphosphate, glucose-1-phosphate, beta-glycerophosphate, and 2'-AMP as substrates. Has been implicated as the pharmacological target for lithium Li(+) action in brain. {ECO:0000269|PubMed:17068342}.	SUBCELLULAR LOCATION: Cytoplasm {ECO:0000269|PubMed:17068342}.		inositol biosynthetic process [GO:0006021]; inositol metabolic process [GO:0006020]; inositol phosphate dephosphorylation [GO:0046855]; phosphate-containing compound metabolic process [GO:0006796]; phosphatidylinositol phosphate biosynthetic process [GO:0046854]; response to lithium ion [GO:0010226]; signal transduction [GO:0007165]	inositol monophosphate 1-phosphatase activity [GO:0008934]; inositol monophosphate 3-phosphatase activity [GO:0052832]; inositol monophosphate 4-phosphatase activity [GO:0052833]; metal ion binding [GO:0046872]; protein homodimerization activity [GO:0042803]	cytoplasm [GO:0005737]; cytosol [GO:0005829]	GO:0005737; GO:0005829; GO:0006020; GO:0006021; GO:0006796; GO:0007165; GO:0008934; GO:0010226; GO:0042803; GO:0046854; GO:0046855; GO:0046872; GO:0052832; GO:0052833	15.0583	15.0663	15.4018	15.7773	15.1733	16.2422	16.0689	16.266	15.6828	16.2186
GOLPH3_Q9H4A6	-0.707917	-0.473458	-0.731582	-1.37749	-0.919373	1.00407	1.54897	1.22234	0.237475	0.196961	GOLPH3	Golgi phosphoprotein 3	Q9H4A6	0.416358	0.000378891	0.0283458	-0.416358	sp|Q9H4A6|GOLP3_HUMAN Golgi phosphoprotein 3 OS=Homo sapiens OX=9606 GN=GOLPH3 PE=1 SV=1	FUNCTION: Phosphatidylinositol-4-phosphate-binding protein that links Golgi membranes to the cytoskeleton and may participate in the tensile force required for vesicle budding from the Golgi. Thereby, may play a role in Golgi membrane trafficking and could indirectly give its flattened shape to the Golgi apparatus. May also bind to the coatomer to regulate Golgi membrane trafficking. May play a r…	SUBCELLULAR LOCATION: Golgi apparatus, Golgi stack membrane; Peripheral membrane protein; Cytoplasmic side. Golgi apparatus, trans-Golgi network membrane; Peripheral membrane protein; Cytoplasmic side. Mitochondrion intermembrane space. Cell membrane {ECO:0000250}. Endosome {ECO:0000250}. Note=Phosphatidylinositol 4-phosphate-binding and oligomerization participate in the recruitment onto Golgi m…		asymmetric Golgi ribbon formation [GO:0090164]; cell adhesion molecule production [GO:0060352]; cell migration [GO:0016477]; cellular response to rapamycin [GO:0072752]; gene expression [GO:0010467]; glycoprotein biosynthetic process [GO:0009101]; Golgi organization [GO:0007030]; Golgi ribbon formation [GO:0090161]; Golgi to plasma membrane protein transport [GO:0043001]; Golgi vesicle budding [G…	enzyme binding [GO:0019899]; phosphatidylinositol-4-phosphate binding [GO:0070273]	cytosol [GO:0005829]; endosome [GO:0005768]; Golgi apparatus [GO:0005794]; Golgi cisterna [GO:0031985]; Golgi cisterna membrane [GO:0032580]; Golgi membrane [GO:0000139]; intracellular membrane-bounded organelle [GO:0043231]; mitochondrial intermembrane space [GO:0005758]; mitochondrion [GO:0005739]; plasma membrane [GO:0005886]; trans-Golgi network [GO:0005802]	GO:0000139; GO:0005739; GO:0005758; GO:0005768; GO:0005794; GO:0005802; GO:0005829; GO:0005886; GO:0006890; GO:0007030; GO:0009101; GO:0009306; GO:0010467; GO:0010821; GO:0016477; GO:0019899; GO:0030032; GO:0031985; GO:0032008; GO:0032580; GO:0043001; GO:0043066; GO:0043231; GO:0045053; GO:0048194; GO:0050714; GO:0050901; GO:0060352; GO:0070273; GO:0072752; GO:0090161; GO:0090164	14.6642	14.7222	14.6584	14.4987	14.612	15.0875	15.2223	15.1415	14.898	14.888
SGCB_Q16585	0.914972	0.778568	0.972633	0.387212	1.31106	-1.21873	-1.3245	-0.187619	-0.559221	-1.07438	SGCB	Beta-sarcoglycan	Q16585	0.329055	0.000385807	0.0283458	0.329055	sp|Q16585|SGCB_HUMAN Beta-sarcoglycan OS=Homo sapiens OX=9606 GN=SGCB PE=1 SV=1	FUNCTION: Component of the sarcoglycan complex, a subcomplex of the dystrophin-glycoprotein complex which forms a link between the F-actin cytoskeleton and the extracellular matrix.	SUBCELLULAR LOCATION: Cell membrane, sarcolemma {ECO:0000250}; Single-pass type II membrane protein {ECO:0000250}. Cytoplasm, cytoskeleton {ECO:0000250}.	DISEASE: Muscular dystrophy, limb-girdle, autosomal recessive 4 (LGMDR4) [MIM:604286]: An autosomal recessive degenerative myopathy characterized by pelvic and shoulder muscle wasting, onset usually in childhood and variable progression rate. {ECO:0000269|PubMed:30345904, ECO:0000269|PubMed:8968749, ECO:0000269|PubMed:9032047, ECO:0000269|PubMed:9565988, ECO:0000269|PubMed:9631401}. Note=The dise…	cardiac muscle cell development [GO:0055013]; muscle organ development [GO:0007517]; vascular associated smooth muscle cell development [GO:0097084]		cytoplasm [GO:0005737]; cytoskeleton [GO:0005856]; dystrophin-associated glycoprotein complex [GO:0016010]; integral component of plasma membrane [GO:0005887]; sarcoglycan complex [GO:0016012]; sarcolemma [GO:0042383]	GO:0005737; GO:0005856; GO:0005887; GO:0007517; GO:0016010; GO:0016012; GO:0042383; GO:0055013; GO:0097084	19.6799	19.6542	19.6908	19.5805	19.7546	19.2778	19.2578	19.4721	19.4021	19.305
FAM160A1_Q05DH4	-1.05256	-0.389357	-0.581244	-0.708955	-1.36854	0.862522	1.25619	1.07198	1.21065	-0.300677	FAM160A1	Protein FAM160A1	Q05DH4	0.557697	0.000385955	0.0283458	-0.557697	sp|Q05DH4|FHI1A_HUMAN FHF complex subunit HOOK interacting protein 1A OS=Homo sapiens OX=9606 GN=FHIP1A PE=1 SV=2	FUNCTION: Probable component of the FTS/Hook/FHIP complex (FHF complex) (PubMed:32073997). FHF complex promotes the distribution of AP-4 complex to the perinuclear area of the cell (PubMed:32073997). {ECO:0000269|PubMed:32073997}.			protein localization to perinuclear region of cytoplasm [GO:1905719]			GO:1905719	13.9166	14.1421	14.0768	14.0334	13.8091	14.5677	14.7016	14.6389	14.6861	14.1722
NT5DC1_Q5TFE4	-0.963189	-1.42912	-0.915859	0.364805	-1.20384	1.11791	0.894098	0.696264	0.578774	0.860157	NT5DC1	5-nucleotidase domain-containing protein 1	Q5TFE4	0.475783	0.000391184	0.0283732	-0.475783	sp|Q5TFE4|NT5D1_HUMAN 5-nucleotidase domain-containing protein 1 OS=Homo sapiens OX=9606 GN=NT5DC1 PE=1 SV=1					5'-nucleotidase activity [GO:0008253]; metal ion binding [GO:0046872]		GO:0008253; GO:0046872	17.6116	17.478	17.6252	17.9925	17.5426	18.2085	18.1443	18.0876	18.0539	18.1346
IGFBP5_P24593	1.20517	1.07999	0.399897	-0.136585	1.49011	-0.313066	-0.484675	-0.841526	-1.37675	-1.02257	IGFBP5	Insulin-like growth factor-binding protein 5	P24593	0.762219	0.000395109	0.0283732	0.762219	sp|P24593|IBP5_HUMAN Insulin-like growth factor-binding protein 5 OS=Homo sapiens OX=9606 GN=IGFBP5 PE=1 SV=1	FUNCTION: IGF-binding proteins prolong the half-life of the IGFs and have been shown to either inhibit or stimulate the growth promoting effects of the IGFs on cell culture. They alter the interaction of IGFs with their cell surface receptors.	SUBCELLULAR LOCATION: Secreted.		aging [GO:0007568]; cellular response to cAMP [GO:0071320]; cellular response to organic cyclic compound [GO:0071407]; female pregnancy [GO:0007565]; glucose homeostasis [GO:0042593]; hair follicle morphogenesis [GO:0031069]; insulin-like growth factor receptor signaling pathway [GO:0048009]; intracellular signal transduction [GO:0035556]; lung alveolus development [GO:0048286]; mammary gland inv…	fibronectin binding [GO:0001968]; insulin-like growth factor I binding [GO:0031994]; insulin-like growth factor II binding [GO:0031995]	endoplasmic reticulum lumen [GO:0005788]; extracellular region [GO:0005576]; extracellular space [GO:0005615]; insulin-like growth factor binding protein complex [GO:0016942]; insulin-like growth factor ternary complex [GO:0042567]	GO:0001558; GO:0001649; GO:0001968; GO:0005576; GO:0005615; GO:0005788; GO:0007165; GO:0007565; GO:0007568; GO:0014912; GO:0016942; GO:0017148; GO:0030336; GO:0031069; GO:0031994; GO:0031995; GO:0035556; GO:0042567; GO:0042593; GO:0043567; GO:0043568; GO:0043569; GO:0044342; GO:0045668; GO:0045926; GO:0048009; GO:0048286; GO:0048662; GO:0051146; GO:0051897; GO:0060056; GO:0060416; GO:0071320; GO:…	15.3027	15.2437	14.9228	14.6697	15.4372	14.5864	14.5054	14.337	14.0845	14.2516
CHORDC1_Q9UHD1	-0.486766	-1.65396	-0.687932	-0.747549	-0.624218	1.29118	1.17176	1.17749	0.385525	0.17447	CHORDC1	Cysteine and histidine-rich domain-containing protein 1	Q9UHD1	0.416021	0.000400267	0.0284278	-0.416021	sp|Q9UHD1|CHRD1_HUMAN Cysteine and histidine-rich domain-containing protein 1 OS=Homo sapiens OX=9606 GN=CHORDC1 PE=1 SV=2	FUNCTION: Regulates centrosome duplication, probably by inhibiting the kinase activity of ROCK2 (PubMed:20230755). Proposed to act as co-chaperone for HSP90 (PubMed:20230755). May play a role in the regulation of NOD1 via a HSP90 chaperone complex (PubMed:20230755). In vitro, has intrinsic chaperone activity (PubMed:20230755). This function may be achieved by inhibiting association of ROCK2 with …			centrosome duplication [GO:0051298]; chaperone-mediated protein folding [GO:0061077]; negative regulation of Rho-dependent protein serine/threonine kinase activity [GO:2000299]; regulation of cellular response to heat [GO:1900034]; regulation of centrosome duplication [GO:0010824]	ADP binding [GO:0043531]; ATP binding [GO:0005524]; Hsp90 protein binding [GO:0051879]; zinc ion binding [GO:0008270]		GO:0005524; GO:0008270; GO:0010824; GO:0043531; GO:0051298; GO:0051879; GO:0061077; GO:1900034; GO:2000299	16.9641	16.6751	16.9143	16.8996	16.9301	17.4044	17.3748	17.3762	17.1801	17.1279
THBS4_P35443	1.31203	1.41521	1.03191	-0.58025	0.800876	-1.0147	-0.740119	-0.788765	-0.686586	-0.749596	THBS4	Thrombospondin-4	P35443	1.46601	0.000426376	0.0299529	1.46601	sp|P35443|TSP4_HUMAN Thrombospondin-4 OS=Homo sapiens OX=9606 GN=THBS4 PE=1 SV=2	FUNCTION: Adhesive glycoprotein that mediates cell-to-cell and cell-to-matrix interactions and is involved in various processes including cellular proliferation, migration, adhesion and attachment, inflammatory response to CNS injury, regulation of vascular inflammation and adaptive responses of the heart to pressure overload and in myocardial function and remodeling. Binds to structural extracel…	SUBCELLULAR LOCATION: Endoplasmic reticulum {ECO:0000250|UniProtKB:Q9Z1T2}. Sarcoplasmic reticulum {ECO:0000250|UniProtKB:Q9Z1T2}. Secreted {ECO:0000250|UniProtKB:Q9Z1T2}. Secreted, extracellular space {ECO:0000250|UniProtKB:Q9Z1T2}. Secreted, extracellular space, extracellular matrix {ECO:0000250|UniProtKB:Q9Z1T2}.		behavioral response to pain [GO:0048266]; endothelial cell-cell adhesion [GO:0071603]; myoblast migration [GO:0051451]; negative regulation of angiogenesis [GO:0016525]; positive regulation of cell division [GO:0051781]; positive regulation of endothelial cell proliferation [GO:0001938]; positive regulation of neutrophil chemotaxis [GO:0090023]; positive regulation of peptidyl-tyrosine phosphoryl…	calcium ion binding [GO:0005509]; growth factor activity [GO:0008083]; heparin binding [GO:0008201]; integrin binding [GO:0005178]	basement membrane [GO:0005604]; collagen-containing extracellular matrix [GO:0062023]; endoplasmic reticulum [GO:0005783]; extracellular exosome [GO:0070062]; extracellular region [GO:0005576]; extracellular space [GO:0005615]; sarcoplasmic reticulum [GO:0016529]	GO:0001938; GO:0005178; GO:0005509; GO:0005576; GO:0005604; GO:0005615; GO:0005783; GO:0006986; GO:0008083; GO:0008201; GO:0016525; GO:0016529; GO:0034103; GO:0034976; GO:0048266; GO:0048771; GO:0050731; GO:0051451; GO:0051781; GO:0062023; GO:0070062; GO:0071603; GO:0090023	20.9248	21.0199	20.6669	19.1822	20.4541	18.7821	19.035	18.9902	19.0843	19.0263
SLC25A23_Q9BV35	0.896879	1.67653	1.27517	-0.364969	0.535277	-0.559223	-0.792859	-0.762879	-0.911316	-0.992602	SLC25A23	Calcium-binding mitochondrial carrier protein SCaMC-3	Q9BV35	0.785687	0.000436281	0.0303192	0.785687	sp|Q9BV35|SCMC3_HUMAN Calcium-binding mitochondrial carrier protein SCaMC-3 OS=Homo sapiens OX=9606 GN=SLC25A23 PE=1 SV=2	FUNCTION: Calcium-dependent mitochondrial solute carrier. Mitochondrial solute carriers shuttle metabolites, nucleotides, and cofactors through the mitochondrial inner membrane (PubMed:15123600). May act as a ATP-Mg/Pi exchanger that mediates the transport of Mg-ATP in exchange for phosphate, catalyzing the net uptake or efflux of adenine nucleotides into or from the mitochondria (PubMed:15123600…	SUBCELLULAR LOCATION: Mitochondrion inner membrane {ECO:0000269|PubMed:15054102, ECO:0000269|PubMed:15123600, ECO:0000269|PubMed:15716113}; Multi-pass membrane protein {ECO:0000269|PubMed:15054102, ECO:0000269|PubMed:15123600, ECO:0000269|PubMed:15716113}.		calcium import into the mitochondrion [GO:0036444]; cellular response to calcium ion [GO:0071277]; mitochondrial calcium ion transmembrane transport [GO:0006851]; positive regulation of mitochondrial calcium ion concentration [GO:0051561]; regulation of cellular hyperosmotic salinity response [GO:1900069]; regulation of oxidative phosphorylation [GO:0002082]; regulation of sequestering of calcium…	ATP transmembrane transporter activity [GO:0005347]; calcium ion binding [GO:0005509]	integral component of membrane [GO:0016021]; mitochondrial inner membrane [GO:0005743]; mitochondrion [GO:0005739]	GO:0002082; GO:0005347; GO:0005509; GO:0005739; GO:0005743; GO:0006851; GO:0016021; GO:0036444; GO:0051282; GO:0051561; GO:0071277; GO:0097274; GO:1900069	13.4603	13.8413	13.6452	12.8436	13.2835	12.7486	12.6344	12.6491	12.5765	12.5368
PKIA_P61925	-0.769736	-1.67971	-0.97445	0.39807	-0.983565	0.565341	1.20357	0.551062	0.921265	0.76816	PKIA	cAMP-dependent protein kinase inhibitor alpha	P61925	0.836107	0.000442789	0.0304441	-0.836107	sp|P61925|IPKA_HUMAN cAMP-dependent protein kinase inhibitor alpha OS=Homo sapiens OX=9606 GN=PKIA PE=1 SV=2	FUNCTION: Extremely potent competitive inhibitor of cAMP-dependent protein kinase activity, this protein interacts with the catalytic subunit of the enzyme after the cAMP-induced dissociation of its regulatory chains.			negative regulation of cAMP-dependent protein kinase activity [GO:2000480]; negative regulation of protein import into nucleus [GO:0042308]; negative regulation of transcription by RNA polymerase II [GO:0000122]; regulation of G2/M transition of mitotic cell cycle [GO:0010389]	cAMP-dependent protein kinase inhibitor activity [GO:0004862]; protein kinase A catalytic subunit binding [GO:0034236]	cytoplasm [GO:0005737]; nucleus [GO:0005634]	GO:0000122; GO:0004862; GO:0005634; GO:0005737; GO:0010389; GO:0034236; GO:0042308; GO:2000480	15.5855	15.111	15.4787	16.1943	15.474	16.2815	16.6142	16.274	16.467	16.3872
KPNA2_P52292	-0.180365	-1.4753	-0.27896	-0.844043	-1.29061	0.955113	1.20052	0.851851	1.1192	-0.0574139	KPNA2	Importin subunit alpha-1	P52292	0.564724	0.000456811	0.0310776	-0.564724	sp|P52292|IMA1_HUMAN Importin subunit alpha-1 OS=Homo sapiens OX=9606 GN=KPNA2 PE=1 SV=1	FUNCTION: Functions in nuclear protein import as an adapter protein for nuclear receptor KPNB1. Binds specifically and directly to substrates containing either a simple or bipartite NLS motif. Docking of the importin/substrate complex to the nuclear pore complex (NPC) is mediated by KPNB1 through binding to nucleoporin FxFG repeats and the complex is subsequently translocated through the pore by …	SUBCELLULAR LOCATION: Cytoplasm {ECO:0000269|PubMed:7604027}. Nucleus {ECO:0000269|PubMed:7604027}.; SUBCELLULAR LOCATION: Endoplasmic reticulum membrane. Golgi apparatus membrane {ECO:0000269|PubMed:17596301}. Note=(Microbial infection) Retained in ER/Golgi membranes upon interaction with SARS-COV virus ORF6 protein. {ECO:0000269|PubMed:17596301}.		DNA metabolic process [GO:0006259]; entry of viral genome into host nucleus through nuclear pore complex via importin [GO:0075506]; NLS-bearing protein import into nucleus [GO:0006607]; positive regulation of viral life cycle [GO:1903902]; postsynapse to nucleus signaling pathway [GO:0099527]; regulation of DNA recombination [GO:0000018]	histone deacetylase binding [GO:0042826]; nuclear import signal receptor activity [GO:0061608]; nuclear localization sequence binding [GO:0008139]; RNA binding [GO:0003723]	cytoplasm [GO:0005737]; cytosol [GO:0005829]; endoplasmic reticulum membrane [GO:0005789]; extrinsic component of postsynaptic specialization membrane [GO:0098892]; glutamatergic synapse [GO:0098978]; Golgi membrane [GO:0000139]; host cell [GO:0043657]; membrane [GO:0016020]; NLS-dependent protein nuclear import complex [GO:0042564]; nucleoplasm [GO:0005654]; nucleus [GO:0005634]	GO:0000018; GO:0000139; GO:0003723; GO:0005634; GO:0005654; GO:0005737; GO:0005789; GO:0005829; GO:0006259; GO:0006607; GO:0008139; GO:0016020; GO:0042564; GO:0042826; GO:0043657; GO:0061608; GO:0075506; GO:0098892; GO:0098978; GO:0099527; GO:1903902	14.5881	14.1388	14.5539	14.3578	14.2029	14.982	15.0672	14.9462	15.0389	14.6307
G3BP1_Q13283	-0.985486	-0.715914	-1.37431	-0.668207	-0.510827	1.03861	0.928164	0.803289	-0.0426674	1.52735	G3BP1	Ras GTPase-activating protein-binding protein 1	Q13283	0.359931	0.000471047	0.031172	-0.359931	sp|Q13283|G3BP1_HUMAN Ras GTPase-activating protein-binding protein 1 OS=Homo sapiens OX=9606 GN=G3BP1 PE=1 SV=1	FUNCTION: ATP- and magnesium-dependent helicase that plays an essential role in innate immunity (PubMed:30510222). Participates in the DNA-triggered cGAS/STING pathway by promoting the DNA binding and activation of CGAS. Enhances also DDX58-induced type I interferon production probably by helping DDX58 at sensing pathogenic RNA (PubMed:30804210). In addition, plays an essential role in stress gra…	SUBCELLULAR LOCATION: Cytoplasm, cytosol {ECO:0000269|PubMed:20180778, ECO:0000269|PubMed:30510222}. Perikaryon {ECO:0000250|UniProtKB:P97855}. Cytoplasm, Stress granule {ECO:0000269|PubMed:12642610, ECO:0000269|PubMed:17210633, ECO:0000269|PubMed:20180778, ECO:0000269|PubMed:23953116, ECO:0000269|PubMed:30404792}. Nucleus {ECO:0000269|PubMed:11604510}. Note=Cytoplasmic in proliferating cells (Pu…		defense response to virus [GO:0051607]; innate immune response [GO:0045087]; negative regulation of canonical Wnt signaling pathway [GO:0090090]; positive regulation of stress granule assembly [GO:0062029]; positive regulation of type I interferon production [GO:0032481]; Ras protein signal transduction [GO:0007265]; stress granule assembly [GO:0034063]	ATP binding [GO:0005524]; ATP hydrolysis activity [GO:0016887]; DNA binding [GO:0003677]; DNA helicase activity [GO:0003678]; DNA/RNA helicase activity [GO:0033677]; endonuclease activity [GO:0004519]; mRNA binding [GO:0003729]; RNA binding [GO:0003723]; RNA helicase activity [GO:0003724]	cytoplasm [GO:0005737]; cytoplasmic stress granule [GO:0010494]; cytosol [GO:0005829]; focal adhesion [GO:0005925]; nucleus [GO:0005634]; perikaryon [GO:0043204]; ribonucleoprotein complex [GO:1990904]	GO:0003677; GO:0003678; GO:0003723; GO:0003724; GO:0003729; GO:0004519; GO:0005524; GO:0005634; GO:0005737; GO:0005829; GO:0005925; GO:0007265; GO:0010494; GO:0016887; GO:0032481; GO:0033677; GO:0034063; GO:0043204; GO:0045087; GO:0051607; GO:0062029; GO:0090090; GO:1990904	17.4719	17.5289	17.3896	17.539	17.5723	17.8999	17.8766	17.8502	17.6713	18.0033
RPS6KA1_Q15418	-1.24166	-0.725824	-0.996214	-0.0675001	-0.949218	1.38174	0.430633	1.45904	-0.174006	0.883008	RPS6KA1	Ribosomal protein S6 kinase alpha-1	Q15418	1.03954	0.000472126	0.031172	-1.03954	sp|Q15418|KS6A1_HUMAN Ribosomal protein S6 kinase alpha-1 OS=Homo sapiens OX=9606 GN=RPS6KA1 PE=1 SV=2	FUNCTION: Serine/threonine-protein kinase that acts downstream of ERK (MAPK1/ERK2 and MAPK3/ERK1) signaling and mediates mitogenic and stress-induced activation of the transcription factors CREB1, ETV1/ER81 and NR4A1/NUR77, regulates translation through RPS6 and EIF4B phosphorylation, and mediates cellular proliferation, survival, and differentiation by modulating mTOR signaling and repressing pr…	SUBCELLULAR LOCATION: Nucleus. Cytoplasm.		cell cycle [GO:0007049]; chemical synaptic transmission [GO:0007268]; hepatocyte proliferation [GO:0072574]; intracellular signal transduction [GO:0035556]; negative regulation of apoptotic process [GO:0043066]; negative regulation of cysteine-type endopeptidase activity involved in apoptotic process [GO:0043154]; peptidyl-serine phosphorylation [GO:0018105]; positive regulation of cell different…	ATP binding [GO:0005524]; cysteine-type endopeptidase inhibitor activity involved in apoptotic process [GO:0043027]; magnesium ion binding [GO:0000287]; protein serine kinase activity [GO:0106310]; protein serine/threonine kinase activity [GO:0004674]; protein serine/threonine/tyrosine kinase activity [GO:0004712]; ribosomal protein S6 kinase activity [GO:0004711]	cytoplasm [GO:0005737]; cytosol [GO:0005829]; nucleoplasm [GO:0005654]; synapse [GO:0045202]	GO:0000287; GO:0004674; GO:0004711; GO:0004712; GO:0005524; GO:0005654; GO:0005737; GO:0005829; GO:0007049; GO:0007165; GO:0007268; GO:0018105; GO:0030307; GO:0035556; GO:0043027; GO:0043066; GO:0043154; GO:0043555; GO:0043620; GO:0045202; GO:0045597; GO:0045893; GO:0045944; GO:0072574; GO:0106310; GO:2000491	13.1494	13.4862	13.3096	13.916	13.3403	14.8622	14.2412	14.9127	13.8464	14.5366
C9orf89_Q96LW7	0.579744	1.97213	0.457068	0.0364545	0.951627	-0.946407	-1.16347	-0.893333	-0.254481	-0.739337	C9orf89	Bcl10-interacting CARD protein	Q96LW7	0.850489	0.000472669	0.031172	0.850489	sp|Q96LW7|CAR19_HUMAN Caspase recruitment domain-containing protein 19 OS=Homo sapiens OX=9606 GN=CARD19 PE=1 SV=1	FUNCTION: Plays a role in inhibiting the effects of BCL10-induced activation of NF-kappa-B. May inhibit the phosphorylation of BCL10 in a CARD-dependent manner. {ECO:0000269|PubMed:15637807}.	SUBCELLULAR LOCATION: [Isoform 1]: Nucleus {ECO:0000269|PubMed:23633586}. Note=Coexpression with BCL10 induced translocation from nucleus to cytosol.; SUBCELLULAR LOCATION: [Isoform 2]: Endoplasmic reticulum membrane {ECO:0000269|PubMed:23633586}; Single-pass membrane protein {ECO:0000269|PubMed:23633586}. Mitochondrion membrane {ECO:0000269|PubMed:23633586}; Single-pass membrane protein {ECO:000…		negative regulation of I-kappaB kinase/NF-kappaB signaling [GO:0043124]	CARD domain binding [GO:0050700]	cytosol [GO:0005829]; endoplasmic reticulum membrane [GO:0005789]; integral component of membrane [GO:0016021]; mitochondrial membrane [GO:0031966]; mitochondrion [GO:0005739]; nucleus [GO:0005634]	GO:0005634; GO:0005739; GO:0005789; GO:0005829; GO:0016021; GO:0031966; GO:0043124; GO:0050700	15.3129	16.0536	15.2476	15.0239	15.5107	14.5011	14.3856	14.5293	14.8691	14.6112
AOC3_Q16853	0.110685	1.82903	0.370352	0.718618	0.985997	-1.28968	-1.18106	-0.383197	-0.843021	-0.317718	AOC3	Membrane primary amine oxidase	Q16853	0.685793	0.000502097	0.032436	0.685793	sp|Q16853|AOC3_HUMAN Membrane primary amine oxidase OS=Homo sapiens OX=9606 GN=AOC3 PE=1 SV=3	FUNCTION: Cell adhesion protein that participates in lymphocyte extravasation and recirculation by mediating the binding of lymphocytes to peripheral lymph node vascular endothelial cells in an L-selectin-independent fashion. Has semicarbazide-sensitive (SSAO) monoamine oxidase activity. May play a role in adipogenesis. {ECO:0000269|PubMed:17400359, ECO:0000269|PubMed:19588076, ECO:0000269|PubMed…	SUBCELLULAR LOCATION: Cell membrane {ECO:0000269|PubMed:9653080}; Single-pass type II membrane protein {ECO:0000269|PubMed:9653080}.		amine metabolic process [GO:0009308]; cell adhesion [GO:0007155]; inflammatory response [GO:0006954]; negative regulation of primary amine oxidase activity [GO:1902283]; response to antibiotic [GO:0046677]	aliphatic-amine oxidase activity [GO:0052595]; aminoacetone:oxygen oxidoreductase(deaminating) activity [GO:0052594]; calcium ion binding [GO:0005509]; copper ion binding [GO:0005507]; identical protein binding [GO:0042802]; phenethylamine:oxygen oxidoreductase (deaminating) activity [GO:0052596]; primary amine oxidase activity [GO:0008131]; protein heterodimerization activity [GO:0046982]; quino…	cell surface [GO:0009986]; cytoplasm [GO:0005737]; early endosome [GO:0005769]; endoplasmic reticulum [GO:0005783]; Golgi apparatus [GO:0005794]; integral component of membrane [GO:0016021]; microvillus [GO:0005902]; plasma membrane [GO:0005886]	GO:0005507; GO:0005509; GO:0005737; GO:0005769; GO:0005783; GO:0005794; GO:0005886; GO:0005902; GO:0006954; GO:0007155; GO:0008131; GO:0009308; GO:0009986; GO:0016021; GO:0042802; GO:0046677; GO:0046982; GO:0048038; GO:0052593; GO:0052594; GO:0052595; GO:0052596; GO:1902283	18.5742	19.308	18.6851	18.8338	18.948	17.9762	18.0226	18.3633	18.1669	18.3913
EGFL7_Q9UHF1	0.602386	1.67912	0.521978	-0.171817	1.36613	-1.14533	-0.544207	-0.428857	-1.15356	-0.725845	EGFL7	Epidermal growth factor-like protein 7	Q9UHF1	0.756814	0.000510309	0.032436	0.756814	sp|Q9UHF1|EGFL7_HUMAN Epidermal growth factor-like protein 7 OS=Homo sapiens OX=9606 GN=EGFL7 PE=1 SV=3	FUNCTION: Regulates vascular tubulogenesis in vivo. Inhibits platelet-derived growth factor (PDGF)-BB-induced smooth muscle cell migration and promotes endothelial cell adhesion to the extracellular matrix and angiogenesis. {ECO:0000269|PubMed:23386126, ECO:0000269|PubMed:23639441}.	SUBCELLULAR LOCATION: Secreted, extracellular space {ECO:0000269|PubMed:23386126}.		anatomical structure development [GO:0048856]; angiogenesis [GO:0001525]; blood vessel development [GO:0001568]; cell adhesion [GO:0007155]; negative regulation of Notch signaling pathway [GO:0045746]; positive regulation of endothelial cell proliferation [GO:0001938]; vasculogenesis [GO:0001570]	calcium ion binding [GO:0005509]; signaling receptor binding [GO:0005102]	cell surface [GO:0009986]; collagen-containing extracellular matrix [GO:0062023]; extracellular region [GO:0005576]; extracellular space [GO:0005615]	GO:0001525; GO:0001568; GO:0001570; GO:0001938; GO:0005102; GO:0005509; GO:0005576; GO:0005615; GO:0007155; GO:0009986; GO:0045746; GO:0048856; GO:0062023	16.6437	17.1533	16.6057	16.2773	17.0052	15.8166	16.1011	16.1557	15.8127	16.0151
RNF26_Q9BY78	1.05595	1.05685	1.60778	-0.218036	0.573361	-0.669756	-0.704105	-0.405404	-0.973932	-1.32271	RNF26	RING finger protein 26	Q9BY78	0.512611	0.000511213	0.032436	0.512611	sp|Q9BY78|RNF26_HUMAN E3 ubiquitin-protein ligase RNF26 OS=Homo sapiens OX=9606 GN=RNF26 PE=1 SV=1	FUNCTION: E3 ubiquitin-protein ligase that plays a key role in endosome organization by retaining vesicles in the perinuclear cloud (PubMed:27368102). Acts as a platform for perinuclear positioning of the endosomal system by mediating ubiquitination of SQSTM1 through interaction with the ubiquitin conjugating enzyme UBE2J1 (PubMed:27368102, PubMed:33472082). Ubiquitinated SQSTM1 attracts specific…	SUBCELLULAR LOCATION: Endoplasmic reticulum membrane {ECO:0000269|PubMed:25254379, ECO:0000269|PubMed:27368102, ECO:0000269|PubMed:32614325}; Multi-pass membrane protein {ECO:0000255}.		endosome organization [GO:0007032]; negative regulation of defense response to virus [GO:0050687]; protein K11-linked ubiquitination [GO:0070979]; protein localization to perinuclear region of cytoplasm [GO:1905719]; protein ubiquitination [GO:0016567]; regulation of type I interferon production [GO:0032479]; ubiquitin-dependent protein catabolic process [GO:0006511]	ubiquitin protein ligase activity [GO:0061630]; zinc ion binding [GO:0008270]	endoplasmic reticulum membrane [GO:0005789]; integral component of membrane [GO:0016021]	GO:0005789; GO:0006511; GO:0007032; GO:0008270; GO:0016021; GO:0016567; GO:0032479; GO:0050687; GO:0061630; GO:0070979; GO:1905719	12.2003	12.2006	12.3738	11.7997	12.0486	11.6577	11.6469	11.7408	11.5621	11.4524
GOLIM4_O00461	1.36429	1.13625	0.752401	-0.16698	0.974193	0.0318429	-0.747009	-1.06532	-1.21795	-1.06173	GOLIM4	Golgi integral membrane protein 4	O00461	0.541719	0.00051191	0.032436	0.541719	sp|O00461|GOLI4_HUMAN Golgi integral membrane protein 4 OS=Homo sapiens OX=9606 GN=GOLIM4 PE=1 SV=1	FUNCTION: Plays a role in endosome to Golgi protein trafficking; mediates protein transport along the late endosome-bypass pathway from the early endosome to the Golgi. {ECO:0000269|PubMed:15331763}.	SUBCELLULAR LOCATION: Golgi apparatus, Golgi stack membrane; Single-pass type II membrane protein. Endosome membrane; Single-pass type II membrane protein. Membrane {ECO:0000305}; Lipid-anchor {ECO:0000305}. Note=Localizes to cis and medial Golgi cisternae. Probably cycles between early Golgi and distal compartments like endosome.				cis-Golgi network [GO:0005801]; endocytic vesicle [GO:0030139]; endosome membrane [GO:0010008]; Golgi apparatus [GO:0005794]; Golgi cisterna membrane [GO:0032580]; Golgi lumen [GO:0005796]; Golgi membrane [GO:0000139]; integral component of membrane [GO:0016021]; membrane [GO:0016020]; transport vesicle [GO:0030133]	GO:0000139; GO:0005794; GO:0005796; GO:0005801; GO:0010008; GO:0016020; GO:0016021; GO:0030133; GO:0030139; GO:0032580	18.2744	18.1984	18.0703	17.7637	18.1443	17.83	17.5702	17.464	17.4131	17.4652
TGFB2_P61812	1.37305	0.791602	0.84809	-0.463173	1.37922	-0.557627	-0.233672	-1.04254	-1.09859	-0.996358	TGFB2	Transforming growth factor beta-2;Latency-associated peptide	P61812	2.46937	0.000548805	0.0334821	2.46937	sp|P61812|TGFB2_HUMAN Transforming growth factor beta-2 proprotein OS=Homo sapiens OX=9606 GN=TGFB2 PE=1 SV=1	FUNCTION: [Transforming growth factor beta-2 proprotein]: Precursor of the Latency-associated peptide (LAP) and Transforming growth factor beta-2 (TGF-beta-2) chains, which constitute the regulatory and active subunit of TGF-beta-2, respectively. {ECO:0000250|UniProtKB:P01137, ECO:0000250|UniProtKB:P04202}.; FUNCTION: [Latency-associated peptide]: Required to maintain the Transforming growth fact…	SUBCELLULAR LOCATION: [Latency-associated peptide]: Secreted, extracellular space, extracellular matrix {ECO:0000250|UniProtKB:P01137}.; SUBCELLULAR LOCATION: [Transforming growth factor beta-2]: Secreted {ECO:0000250|UniProtKB:P01137}.	DISEASE: Note=A chromosomal aberration involving TGFB2 is found in a family with Peters anomaly. Translocation t(1;7)(q41;p21) with HDAC9. {ECO:0000269|PubMed:12706107}.; DISEASE: Loeys-Dietz syndrome 4 (LDS4) [MIM:614816]: An aortic aneurysm syndrome with widespread systemic involvement. LDS4 is characterized by arterial tortuosity, aortic dissection, intracranial aneurysm and subarachnoid hemor…	activation of protein kinase activity [GO:0032147]; ascending aorta morphogenesis [GO:0035910]; atrial septum morphogenesis [GO:0060413]; atrial septum primum morphogenesis [GO:0003289]; atrioventricular valve morphogenesis [GO:0003181]; BMP signaling pathway [GO:0030509]; cardiac epithelial to mesenchymal transition [GO:0060317]; cardiac muscle cell proliferation [GO:0060038]; cardiac right vent…	amyloid-beta binding [GO:0001540]; cytokine activity [GO:0005125]; growth factor activity [GO:0008083]; protein homodimerization activity [GO:0042803]; signaling receptor binding [GO:0005102]; transforming growth factor beta receptor binding [GO:0005160]; type II transforming growth factor beta receptor binding [GO:0005114]; type III transforming growth factor beta receptor binding [GO:0034714]	axon [GO:0030424]; collagen-containing extracellular matrix [GO:0062023]; extracellular region [GO:0005576]; extracellular space [GO:0005615]; neuronal cell body [GO:0043025]; plasma membrane [GO:0005886]; platelet alpha granule lumen [GO:0031093]; transforming growth factor beta complex [GO:0099126]	GO:0000902; GO:0001501; GO:0001540; GO:0001654; GO:0001666; GO:0001822; GO:0001837; GO:0001843; GO:0001942; GO:0003007; GO:0003148; GO:0003149; GO:0003179; GO:0003181; GO:0003184; GO:0003203; GO:0003215; GO:0003222; GO:0003274; GO:0003289; GO:0003407; GO:0005102; GO:0005114; GO:0005125; GO:0005160; GO:0005576; GO:0005615; GO:0005886; GO:0006468; GO:0007179; GO:0007435; GO:0007507; GO:0008083; GO:…	15.7844	14.8708	14.9595	12.8991	15.7941	12.7507	13.2597	11.9887	11.9006	12.0613
COLEC10_Q9Y6Z7	1.13444	1.55351	0.294685	-0.367491	1.31623	-0.80356	-1.07963	-0.419114	-0.689314	-0.939763	COLEC10	Collectin-10	Q9Y6Z7	1.9145	0.000552956	0.0334821	1.9145	sp|Q9Y6Z7|COL10_HUMAN Collectin-10 OS=Homo sapiens OX=9606 GN=COLEC10 PE=1 SV=2	FUNCTION: Lectin that binds to various sugars: galactose > mannose = fucose > N-acetylglucosamine > N-acetylgalactosamine (PubMed:10224141). Acts as a chemoattractant, probably involved in the regulation of cell migration (PubMed:28301481). {ECO:0000269|PubMed:10224141, ECO:0000269|PubMed:28301481}.	SUBCELLULAR LOCATION: Secreted {ECO:0000269|PubMed:28301481}. Golgi apparatus {ECO:0000250|UniProtKB:Q8CF98}. Cytoplasm {ECO:0000269|PubMed:10224141}.	DISEASE: 3MC syndrome 3 (3MC3) [MIM:248340]: A form of 3MC syndrome, an autosomal recessive disorder characterized by facial dysmorphism, craniosynostosis, learning disability, and genital, limb and vesicorenal anomalies. Facial features include hypertelorism, blepharophimosis, blepharoptosis and highly arched eyebrows, cleft lip and/or palate. The term 3MC syndrome includes Carnevale, Mingarelli…	cell surface pattern recognition receptor signaling pathway [GO:0002752]; complement activation, lectin pathway [GO:0001867]; cranial skeletal system development [GO:1904888]; positive regulation of opsonization [GO:1903028]; proteolysis [GO:0006508]	chemoattractant activity [GO:0042056]; mannose binding [GO:0005537]	collagen trimer [GO:0005581]; cytoplasm [GO:0005737]; external side of plasma membrane [GO:0009897]; extracellular region [GO:0005576]; extracellular space [GO:0005615]; Golgi apparatus [GO:0005794]; serine-type endopeptidase complex [GO:1905370]	GO:0001867; GO:0002752; GO:0005537; GO:0005576; GO:0005581; GO:0005615; GO:0005737; GO:0005794; GO:0006508; GO:0009897; GO:0042056; GO:1903028; GO:1904888; GO:1905370	15.7232	16.2334	14.7009	13.8947	15.9445	13.3638	13.0277	13.8318	13.5029	13.198
SUCO_Q9UBS9	-0.423034	-1.69952	-0.95553	-0.603278	-0.462924	0.627443	0.69012	0.164208	1.33373	1.32878	SUCO	SUN domain-containing ossification factor	Q9UBS9	0.411529	0.000557394	0.0334821	-0.411529	sp|Q9UBS9|SUCO_HUMAN SUN domain-containing ossification factor OS=Homo sapiens OX=9606 GN=SUCO PE=1 SV=1	FUNCTION: Required for bone modeling during late embryogenesis. Regulates type I collagen synthesis in osteoblasts during their postnatal maturation (By similarity). {ECO:0000250}.	SUBCELLULAR LOCATION: Rough endoplasmic reticulum membrane {ECO:0000250}; Single-pass type I membrane protein {ECO:0000250}.		ossification [GO:0001503]; positive regulation of collagen biosynthetic process [GO:0032967]; positive regulation of osteoblast differentiation [GO:0045669]; regulation of bone remodeling [GO:0046850]		cytoplasm [GO:0005737]; integral component of membrane [GO:0016021]; membrane [GO:0016020]; rough endoplasmic reticulum [GO:0005791]; rough endoplasmic reticulum membrane [GO:0030867]	GO:0001503; GO:0005737; GO:0005791; GO:0016020; GO:0016021; GO:0030867; GO:0032967; GO:0045669; GO:0046850	12.6837	12.3669	12.5516	12.639	12.6738	12.9445	12.9601	12.8295	13.1199	13.1186
MTSS1_O43312	-0.811688	-0.0931169	-1.1555	-0.237316	-1.7312	1.22109	0.507601	1.15777	0.889235	0.253122	MTSS1	Metastasis suppressor protein 1	O43312	0.578522	0.000558263	0.0334821	-0.578522	sp|O43312|MTSS1_HUMAN Protein MTSS 1 OS=Homo sapiens OX=9606 GN=MTSS1 PE=1 SV=2	FUNCTION: May be related to cancer progression or tumor metastasis in a variety of organ sites, most likely through an interaction with the actin cytoskeleton.	SUBCELLULAR LOCATION: Cytoplasm, cytoskeleton.		actin cytoskeleton organization [GO:0030036]; adherens junction maintenance [GO:0034334]; cell adhesion [GO:0007155]; cellular response to fluid shear stress [GO:0071498]; epithelial cell proliferation involved in renal tubule morphogenesis [GO:2001013]; glomerulus morphogenesis [GO:0072102]; microspike assembly [GO:0030035]; negative regulation of epithelial cell proliferation [GO:0050680]; neph…	actin binding [GO:0003779]; actin monomer binding [GO:0003785]; identical protein binding [GO:0042802]; phospholipid binding [GO:0005543]; signaling receptor binding [GO:0005102]	actin cytoskeleton [GO:0015629]; cytoplasm [GO:0005737]; endocytic vesicle [GO:0030139]; intrinsic component of the cytoplasmic side of the plasma membrane [GO:0031235]; ruffle [GO:0001726]	GO:0001726; GO:0003779; GO:0003785; GO:0005102; GO:0005543; GO:0005737; GO:0007009; GO:0007155; GO:0007169; GO:0015629; GO:0030035; GO:0030036; GO:0030139; GO:0031235; GO:0032233; GO:0034334; GO:0042802; GO:0050680; GO:0061333; GO:0071498; GO:0072102; GO:0072160; GO:2001013	15.8719	16.1299	15.7485	16.0781	15.5418	16.6016	16.3455	16.5789	16.4825	16.2542
SIGLEC1_Q9BZZ2	-1.15607	-0.362624	-1.03566	0.148058	-1.6095	0.566438	0.737312	0.764462	0.473013	1.47458	SIGLEC1	Sialoadhesin	Q9BZZ2	0.61269	0.00056085	0.0334821	-0.61269	sp|Q9BZZ2|SN_HUMAN Sialoadhesin OS=Homo sapiens OX=9606 GN=SIGLEC1 PE=1 SV=2	FUNCTION: Acts as an endocytic receptor mediating clathrin dependent endocytosis. Macrophage-restricted adhesion molecule that mediates sialic-acid dependent binding to lymphocytes, including granulocytes, monocytes, natural killer cells, B-cells and CD8 T-cells. Preferentially binds to alpha-2,3-linked sialic acid (By similarity). Binds to SPN/CD43 on T-cells (By similarity). May play a role in …	SUBCELLULAR LOCATION: [Isoform 1]: Cell membrane; Single-pass type I membrane protein.; SUBCELLULAR LOCATION: [Isoform 2]: Secreted.		cell-cell adhesion [GO:0098609]; cell-matrix adhesion [GO:0007160]; clathrin-dependent endocytosis of virus by host cell [GO:0075512]; inflammatory response [GO:0006954]	carbohydrate binding [GO:0030246]; virion binding [GO:0046790]	early endosome [GO:0005769]; extracellular region [GO:0005576]; integral component of membrane [GO:0016021]; late endosome [GO:0005770]; plasma membrane [GO:0005886]	GO:0005576; GO:0005769; GO:0005770; GO:0005886; GO:0006954; GO:0007160; GO:0016021; GO:0030246; GO:0046790; GO:0075512; GO:0098609	12.6131	12.9157	12.659	13.1105	12.4401	13.2701	13.3353	13.3456	13.2345	13.6165
_P0DP58	-1.2557	-1.3387	-1.18008	0.387917	-0.60393	0.237751	1.04278	1.18898	0.827587	0.693393			P0DP58	0.705443	0.000564095	0.0334821	-0.705443	sp|P0DP58|LYNX1_HUMAN Ly-6/neurotoxin-like protein 1 OS=Homo sapiens OX=9606 GN=LYNX1 PE=1 SV=1	FUNCTION: Acts in different tissues through interaction to nicotinic acetylcholine receptors (nAChRs) (PubMed:21252236). The proposed role as modulator of nAChR activity seems to be dependent on the nAChR subtype and stoichiometry, and to involve an effect on nAChR trafficking and its cell surface expression, and on single channel properties of the nAChR inserted in the plasma membrane. Modulates…	SUBCELLULAR LOCATION: Cell membrane {ECO:0000255}; Lipid-anchor, GPI-anchor {ECO:0000255}. Cell projection, dendrite {ECO:0000250|UniProtKB:P0DP60}. Endoplasmic reticulum {ECO:0000250|UniProtKB:P0DP60}. Note=Detected in Purkinje cells soma and proximal dendrites. {ECO:0000250|UniProtKB:P0DP60}.		regulation of neurotransmitter receptor activity [GO:0099601]	acetylcholine receptor binding [GO:0033130]; acetylcholine receptor inhibitor activity [GO:0030550]; acetylcholine receptor regulator activity [GO:0030548]	anchored component of membrane [GO:0031225]; dendrite [GO:0030425]; endoplasmic reticulum [GO:0005783]; plasma membrane [GO:0005886]	GO:0005783; GO:0005886; GO:0030425; GO:0030548; GO:0030550; GO:0031225; GO:0033130; GO:0099601	14.3909	14.3542	14.4243	15.1173	14.6789	15.0509	15.4067	15.4713	15.3116	15.2523
CFP_P27918	0.487729	1.36616	0.483566	-0.129005	1.73726	-0.544788	-0.643687	-0.538362	-0.822633	-1.39624	CFP	Properdin	P27918	1.12265	0.000566792	0.0334821	1.12265	sp|P27918|PROP_HUMAN Properdin OS=Homo sapiens OX=9606 GN=CFP PE=1 SV=2	FUNCTION: A positive regulator of the alternate pathway (AP) of complement (PubMed:20382442, PubMed:28264884). It binds to and stabilizes the C3- and C5-convertase enzyme complexes (PubMed:20382442, PubMed:28264884). Inhibits CFI-CFH mediated degradation of Complement C3 beta chain (C3b) (PubMed:31507604). {ECO:0000269|PubMed:20382442, ECO:0000269|PubMed:28264884, ECO:0000269|PubMed:31507604}.	SUBCELLULAR LOCATION: Secreted {ECO:0000269|PubMed:28264884, ECO:0000269|PubMed:31507604}.	DISEASE: Properdin deficiency (PFD) [MIM:312060]: Results in higher susceptibility to bacterial infections; especially to meningococcal infections. Three phenotypes have been reported: complete deficiency (type I), incomplete deficiency (type II), and dysfunction of properdin (type III). {ECO:0000269|PubMed:10909851, ECO:0000269|PubMed:28264884, ECO:0000269|PubMed:31507604, ECO:0000269|PubMed:887…	complement activation [GO:0006956]; complement activation, alternative pathway [GO:0006957]; defense response to bacterium [GO:0042742]; immune response [GO:0006955]; positive regulation of immune response [GO:0050778]; positive regulation of opsonization [GO:1903028]		endoplasmic reticulum lumen [GO:0005788]; extracellular region [GO:0005576]; extracellular space [GO:0005615]; plasma membrane [GO:0005886]; specific granule lumen [GO:0035580]; tertiary granule lumen [GO:1904724]	GO:0005576; GO:0005615; GO:0005788; GO:0005886; GO:0006955; GO:0006956; GO:0006957; GO:0035580; GO:0042742; GO:0050778; GO:1903028; GO:1904724	15.0535	15.6784	15.0506	14.6149	15.9424	14.3191	14.2488	14.3237	14.1215	13.7135
CSDC2_Q9Y534	-0.869652	-1.02693	-0.643424	-0.884374	-0.683634	0.107641	2	0.38301	0.962733	0.650187	CSDC2	Cold shock domain-containing protein C2	Q9Y534	0.442103	0.000569864	0.0334821	-0.442103	sp|Q9Y534|CSDC2_HUMAN Cold shock domain-containing protein C2 OS=Homo sapiens OX=9606 GN=CSDC2 PE=1 SV=1	FUNCTION: RNA-binding factor which binds specifically to the very 3'-UTR ends of both histone H1 and H3.3 mRNAs, encompassing the polyadenylation signal. Might play a central role in the negative regulation of histone variant synthesis in the developing brain (By similarity). {ECO:0000250}.	SUBCELLULAR LOCATION: Nucleus {ECO:0000250}. Cytoplasm {ECO:0000250}. Note=PIPPin-RNA complexes are located to the nucleus. {ECO:0000250}.		mRNA processing [GO:0006397]; regulation of mRNA stability [GO:0043488]	mRNA 3'-UTR binding [GO:0003730]; RNA binding [GO:0003723]	cytoplasm [GO:0005737]; nucleus [GO:0005634]	GO:0003723; GO:0003730; GO:0005634; GO:0005737; GO:0006397; GO:0043488	16.4131	16.3708	16.474	16.4092	16.4632	16.6761	17.1864	16.7501	16.9061	16.822
COL12A1_Q99715	1.25317	1.60181	0.619374	-0.475291	0.931885	-0.870758	-0.480765	-0.877018	-0.552723	-1.14969	COL12A1	Collagen alpha-1(XII) chain	Q99715	1.33357	0.000589584	0.0336483	1.33357	sp|Q99715|COCA1_HUMAN Collagen alpha-1(XII) chain OS=Homo sapiens OX=9606 GN=COL12A1 PE=1 SV=2	FUNCTION: Type XII collagen interacts with type I collagen-containing fibrils, the COL1 domain could be associated with the surface of the fibrils, and the COL2 and NC3 domains may be localized in the perifibrillar matrix. {ECO:0000250}.	SUBCELLULAR LOCATION: Secreted, extracellular space, extracellular matrix {ECO:0000250}.	DISEASE: Ullrich congenital muscular dystrophy 2 (UCMD2) [MIM:616470]: A form of Ullrich muscular dystrophy, a congenital myopathy characterized by muscle weakness and multiple joint contractures, generally noted at birth or early infancy. The clinical course is more severe than in Bethlem myopathy. {ECO:0000269|PubMed:24334604}. Note=The disease is caused by variants affecting the gene represent…	cell adhesion [GO:0007155]; collagen fibril organization [GO:0030199]; endodermal cell differentiation [GO:0035987]	extracellular matrix structural constituent conferring tensile strength [GO:0030020]	collagen type XII trimer [GO:0005595]; collagen-containing extracellular matrix [GO:0062023]; endoplasmic reticulum lumen [GO:0005788]; extracellular exosome [GO:0070062]; extracellular region [GO:0005576]; extracellular space [GO:0005615]; extracellular vesicle [GO:1903561]	GO:0005576; GO:0005595; GO:0005615; GO:0005788; GO:0007155; GO:0030020; GO:0030199; GO:0035987; GO:0062023; GO:0070062; GO:1903561	19.8934	20.1891	19.3558	18.4274	19.6209	18.092	18.4228	18.0867	18.3617	17.8554
CPM_P14384	-1.52771	-0.941097	-0.33878	-0.344421	-0.882044	0.869935	0.717442	1.15042	-0.168545	1.4648	CPM	Carboxypeptidase M	P14384	0.539465	0.000596191	0.0336483	-0.539465	sp|P14384|CBPM_HUMAN Carboxypeptidase M OS=Homo sapiens OX=9606 GN=CPM PE=1 SV=2	FUNCTION: Specifically removes C-terminal basic residues (Arg or Lys) from peptides and proteins. It is believed to play important roles in the control of peptide hormone and growth factor activity at the cell surface, and in the membrane-localized degradation of extracellular proteins. {ECO:0000269|PubMed:12457462}.	SUBCELLULAR LOCATION: Cell membrane {ECO:0000269|PubMed:12457462}; Lipid-anchor, GPI-anchor {ECO:0000269|PubMed:12457462}.		anatomical structure morphogenesis [GO:0009653]; peptide metabolic process [GO:0006518]; protein processing [GO:0016485]	carboxypeptidase activity [GO:0004180]; metallocarboxypeptidase activity [GO:0004181]; zinc ion binding [GO:0008270]	anchored component of membrane [GO:0031225]; cell surface [GO:0009986]; extracellular exosome [GO:0070062]; extracellular region [GO:0005576]; extracellular space [GO:0005615]; plasma membrane [GO:0005886]	GO:0004180; GO:0004181; GO:0005576; GO:0005615; GO:0005886; GO:0006518; GO:0008270; GO:0009653; GO:0009986; GO:0016485; GO:0031225; GO:0070062	14.2352	14.4313	14.6326	14.6307	14.451	15.0367	14.9857	15.1305	14.6895	15.2356
GLUD2_P49448	-1.28056	-0.174258	-0.729041	-0.668403	-1.13554	0.881703	0.578553	0.557406	1.90663	0.0635051	GLUD2	Glutamate dehydrogenase 2, mitochondrial	P49448	0.668126	0.00060153	0.0336483	-0.668126	sp|P49448|DHE4_HUMAN Glutamate dehydrogenase 2, mitochondrial OS=Homo sapiens OX=9606 GN=GLUD2 PE=1 SV=2	FUNCTION: Important for recycling the chief excitatory neurotransmitter, glutamate, during neurotransmission.	SUBCELLULAR LOCATION: Mitochondrion matrix {ECO:0000269|PubMed:22709669}.		glutamate biosynthetic process [GO:0006537]; glutamate catabolic process [GO:0006538]; glutamate metabolic process [GO:0006536]	ADP binding [GO:0043531]; glutamate dehydrogenase (NAD+) activity [GO:0004352]; glutamate dehydrogenase (NADP+) activity [GO:0004354]; glutamate dehydrogenase [NAD(P)+] activity [GO:0004353]; GTP binding [GO:0005525]; leucine binding [GO:0070728]	mitochondrial matrix [GO:0005759]; mitochondrion [GO:0005739]	GO:0004352; GO:0004353; GO:0004354; GO:0005525; GO:0005739; GO:0005759; GO:0006536; GO:0006537; GO:0006538; GO:0043531; GO:0070728	13.251	13.7144	13.482	13.5074	13.3118	14.1567	14.0297	14.0209	14.586	13.814
DPM3_Q9P2X0	1.11137	1.34259	1.06081	-0.440746	0.926149	-0.46957	-0.430314	-0.860094	-1.37538	-0.864813	DPM3	Dolichol-phosphate mannosyltransferase subunit 3	Q9P2X0	0.618579	0.000606292	0.0336483	0.618579	sp|Q9P2X0|DPM3_HUMAN Dolichol-phosphate mannosyltransferase subunit 3 OS=Homo sapiens OX=9606 GN=DPM3 PE=1 SV=2	FUNCTION: Stabilizer subunit of the dolichol-phosphate mannose (DPM) synthase complex; tethers catalytic subunit DPM1 to the endoplasmic reticulum. {ECO:0000269|PubMed:10835346}.	SUBCELLULAR LOCATION: Endoplasmic reticulum membrane; Multi-pass membrane protein.	DISEASE: Muscular dystrophy-dystroglycanopathy congenital with impaired intellectual development B15 (MDDGB15) [MIM:618992]: An autosomal recessive, congenital muscular disorder characterized by hyperCKemia, myopathic features observed on muscle biopsy, developmental delay, mildly impaired intellectual development with learning difficulties, epilepsy, and mild white matter abnormalities. {ECO:000…	carbohydrate metabolic process [GO:0005975]; dolichol metabolic process [GO:0019348]; GPI anchor biosynthetic process [GO:0006506]; protein C-linked glycosylation via 2'-alpha-mannosyl-L-tryptophan [GO:0018406]; protein mannosylation [GO:0035268]; protein O-linked mannosylation [GO:0035269]; regulation of protein stability [GO:0031647]	enzyme activator activity [GO:0008047]	dolichol-phosphate-mannose synthase complex [GO:0033185]; endoplasmic reticulum [GO:0005783]; endoplasmic reticulum membrane [GO:0005789]; integral component of endoplasmic reticulum membrane [GO:0030176]; mannosyltransferase complex [GO:0031501]; membrane [GO:0016020]	GO:0005783; GO:0005789; GO:0005975; GO:0006506; GO:0008047; GO:0016020; GO:0018406; GO:0019348; GO:0030176; GO:0031501; GO:0031647; GO:0033185; GO:0035268; GO:0035269	16.6442	16.7336	16.6247	16.0442	16.5726	16.033	16.0482	15.882	15.6828	15.8802
S100A6_P06703	1.16217	1.11222	0.756716	-0.109177	1.06692	-0.274101	-1.60423	-1.11055	-0.892087	-0.107896	S100A6	Protein S100-A6	P06703	0.655757	0.000608648	0.0336483	0.655757	sp|P06703|S10A6_HUMAN Protein S100-A6 OS=Homo sapiens OX=9606 GN=S100A6 PE=1 SV=1	FUNCTION: May function as calcium sensor and modulator, contributing to cellular calcium signaling. May function by interacting with other proteins, such as TPR-containing proteins, and indirectly play a role in many physiological processes such as the reorganization of the actin cytoskeleton and in cell motility. Binds 2 calcium ions. Calcium binding is cooperative. {ECO:0000269|PubMed:22399290}.	SUBCELLULAR LOCATION: Nucleus envelope. Cytoplasm. Cell membrane; Peripheral membrane protein; Cytoplasmic side.		axonogenesis [GO:0007409]; positive regulation of fibroblast proliferation [GO:0048146]; signal transduction [GO:0007165]	calcium ion binding [GO:0005509]; calcium-dependent protein binding [GO:0048306]; ion transmembrane transporter activity [GO:0015075]; protein homodimerization activity [GO:0042803]; S100 protein binding [GO:0044548]; tropomyosin binding [GO:0005523]; zinc ion binding [GO:0008270]	collagen-containing extracellular matrix [GO:0062023]; cytoplasm [GO:0005737]; cytosol [GO:0005829]; extracellular exosome [GO:0070062]; extracellular region [GO:0005576]; extrinsic component of cytoplasmic side of plasma membrane [GO:0031234]; nuclear envelope [GO:0005635]; nucleus [GO:0005634]; perinuclear region of cytoplasm [GO:0048471]; plasma membrane [GO:0005886]; ruffle [GO:0001726]	GO:0001726; GO:0005509; GO:0005523; GO:0005576; GO:0005634; GO:0005635; GO:0005737; GO:0005829; GO:0005886; GO:0007165; GO:0007409; GO:0008270; GO:0015075; GO:0031234; GO:0042803; GO:0044548; GO:0048146; GO:0048306; GO:0048471; GO:0062023; GO:0070062	18.7884	18.7678	18.6217	18.2658	18.7492	18.1981	17.6514	17.8543	17.9441	18.2664
DMD_P11532	0.362004	1.18867	1.12038	0.366051	1.35915	-0.760281	-1.12323	-0.416087	-1.11417	-0.982495	DMD	Dystrophin	P11532	0.288895	0.000616352	0.0336483	0.288895	sp|P11532|DMD_HUMAN Dystrophin OS=Homo sapiens OX=9606 GN=DMD PE=1 SV=3	FUNCTION: Anchors the extracellular matrix to the cytoskeleton via F-actin. Ligand for dystroglycan. Component of the dystrophin-associated glycoprotein complex which accumulates at the neuromuscular junction (NMJ) and at a variety of synapses in the peripheral and central nervous systems and has a structural function in stabilizing the sarcolemma. Also implicated in signaling events and synaptic…	SUBCELLULAR LOCATION: Cell membrane, sarcolemma {ECO:0000250|UniProtKB:P11531}; Peripheral membrane protein {ECO:0000250|UniProtKB:P11531}; Cytoplasmic side {ECO:0000250|UniProtKB:P11531}. Cytoplasm, cytoskeleton {ECO:0000250|UniProtKB:P11531}. Postsynaptic cell membrane {ECO:0000250|UniProtKB:P11531}. Note=In muscle cells, sarcolemma localization requires the presence of ANK2, while localization…	DISEASE: Duchenne muscular dystrophy (DMD) [MIM:310200]: Most common form of muscular dystrophy; a sex-linked recessive disorder. It typically presents in boys aged 3 to 7 year as proximal muscle weakness causing waddling gait, toe-walking, lordosis, frequent falls, and difficulty in standing up and climbing up stairs. The pelvic girdle is affected first, then the shoulder girdle. Progression is …	actin cytoskeleton organization [GO:0030036]; cardiac muscle cell action potential [GO:0086001]; cardiac muscle contraction [GO:0060048]; maintenance of blood-brain barrier [GO:0035633]; motile cilium assembly [GO:0044458]; muscle cell cellular homeostasis [GO:0046716]; muscle cell development [GO:0055001]; muscle organ development [GO:0007517]; negative regulation of peptidyl-cysteine S-nitrosyl…	actin binding [GO:0003779]; actin filament binding [GO:0051015]; dystroglycan binding [GO:0002162]; myosin binding [GO:0017022]; nitric-oxide synthase binding [GO:0050998]; structural constituent of cytoskeleton [GO:0005200]; structural constituent of muscle [GO:0008307]; vinculin binding [GO:0017166]; zinc ion binding [GO:0008270]	cell junction [GO:0030054]; cell projection [GO:0042995]; cell surface [GO:0009986]; cell-substrate junction [GO:0030055]; cortical actin cytoskeleton [GO:0030864]; costamere [GO:0043034]; cytoskeleton [GO:0005856]; cytosol [GO:0005829]; dystrophin-associated glycoprotein complex [GO:0016010]; filopodium [GO:0030175]; filopodium membrane [GO:0031527]; membrane raft [GO:0045121]; neuron projection…	GO:0002027; GO:0002162; GO:0003779; GO:0005200; GO:0005634; GO:0005829; GO:0005856; GO:0005886; GO:0007517; GO:0007519; GO:0008104; GO:0008270; GO:0008307; GO:0009986; GO:0010880; GO:0010881; GO:0010976; GO:0014809; GO:0014819; GO:0016010; GO:0016013; GO:0017022; GO:0017166; GO:0030018; GO:0030036; GO:0030054; GO:0030055; GO:0030175; GO:0030864; GO:0031527; GO:0032991; GO:0033137; GO:0035633; GO:…	23.0535	23.1893	23.1781	23.0541	23.2173	22.8691	22.8095	22.9256	22.811	22.8326
MFGE8_Q08431	1.49689	1.35002	0.67573	-0.422003	0.909298	-0.698615	-1.11166	-0.696855	-1.01273	-0.490073	MFGE8	Lactadherin;Lactadherin short form;Medin	Q08431	0.578525	0.000620528	0.0336483	0.578525	sp|Q08431|MFGM_HUMAN Lactadherin OS=Homo sapiens OX=9606 GN=MFGE8 PE=1 SV=3	FUNCTION: Plays an important role in the maintenance of intestinal epithelial homeostasis and the promotion of mucosal healing. Promotes VEGF-dependent neovascularization (By similarity). Contributes to phagocytic removal of apoptotic cells in many tissues. Specific ligand for the alpha-v/beta-3 and alpha-v/beta-5 receptors. Also binds to phosphatidylserine-enriched cell surfaces in a receptor-in…	SUBCELLULAR LOCATION: Membrane {ECO:0000269|PubMed:19204935}; Peripheral membrane protein {ECO:0000269|PubMed:19204935}. Secreted {ECO:0000269|PubMed:19204935}. Cytoplasmic vesicle, secretory vesicle, acrosome membrane {ECO:0000250|UniProtKB:P79385}; Peripheral membrane protein {ECO:0000250|UniProtKB:P79385}. Note=Located in the acrosomal region of zona-pellucida bound sperm. {ECO:0000250|UniProt…		angiogenesis [GO:0001525]; apoptotic cell clearance [GO:0043277]; cell adhesion [GO:0007155]; phagocytosis, engulfment [GO:0006911]; phagocytosis, recognition [GO:0006910]; positive regulation of phagocytosis [GO:0050766]; single fertilization [GO:0007338]	integrin binding [GO:0005178]; phosphatidylethanolamine binding [GO:0008429]; phosphatidylserine binding [GO:0001786]	acrosomal membrane [GO:0002080]; collagen-containing extracellular matrix [GO:0062023]; endoplasmic reticulum lumen [GO:0005788]; external side of plasma membrane [GO:0009897]; extracellular exosome [GO:0070062]; extracellular region [GO:0005576]; extracellular space [GO:0005615]; extracellular vesicle [GO:1903561]; extrinsic component of plasma membrane [GO:0019897]; membrane [GO:0016020]	GO:0001525; GO:0001786; GO:0002080; GO:0005178; GO:0005576; GO:0005615; GO:0005788; GO:0006910; GO:0006911; GO:0007155; GO:0007338; GO:0008429; GO:0009897; GO:0016020; GO:0019897; GO:0043277; GO:0050766; GO:0062023; GO:0070062; GO:1903561	19.3265	19.2736	19.0304	18.6344	19.1146	18.5347	18.3857	18.5353	18.4214	18.6099
EML4_Q9HC35	0.773051	1.62695	0.549717	-0.0360912	1.21852	-0.470924	-0.42021	-1.06407	-1.27152	-0.905429	EML4	Echinoderm microtubule-associated protein-like 4	Q9HC35	0.401369	0.000632005	0.0336483	0.401369	sp|Q9HC35|EMAL4_HUMAN Echinoderm microtubule-associated protein-like 4 OS=Homo sapiens OX=9606 GN=EML4 PE=1 SV=3	FUNCTION: Essential for the formation and stability of microtubules (MTs) (PubMed:16890222, PubMed:31409757). Required for the organization of the mitotic spindle and for the proper attachment of kinetochores to MTs (PubMed:25789526). Promotes the recruitment of NUDC to the mitotic spindle for mitotic progression (PubMed:25789526). {ECO:0000269|PubMed:16890222, ECO:0000269|PubMed:25789526, ECO:00…	SUBCELLULAR LOCATION: Cytoplasm, cytoskeleton {ECO:0000269|PubMed:16890222, ECO:0000269|PubMed:31409757, ECO:0000305}. Cytoplasm {ECO:0000269|PubMed:16890222}. Cytoplasm, cytoskeleton, spindle {ECO:0000269|PubMed:16890222, ECO:0000269|PubMed:25789526}. Cytoplasm, cytoskeleton, microtubule organizing center {ECO:0000269|PubMed:16890222, ECO:0000269|PubMed:25789526}. Midbody {ECO:0000269|PubMed:257…	DISEASE: Note=A chromosomal aberration involving EML4 has been identified in a subset of patients with non-small-cell lung carcinoma. This aberration leads to the production of a fusion protein between the N-terminus of EML4 and the C-terminus of ALK. It is unclear whether the fusion protein is caused by a simple inversion within 2p (inv(2)(p21p23)) or whether the chromosome translocation involvi…	attachment of spindle microtubules to kinetochore [GO:0008608]; cell division [GO:0051301]; microtubule cytoskeleton organization [GO:0000226]; microtubule-based process [GO:0007017]; mitotic cell cycle [GO:0000278]; mitotic metaphase plate congression [GO:0007080]	alpha-tubulin binding [GO:0043014]; beta-tubulin binding [GO:0048487]; microtubule binding [GO:0008017]; protein self-association [GO:0043621]	cytoplasm [GO:0005737]; cytosol [GO:0005829]; membrane [GO:0016020]; microtubule [GO:0005874]; microtubule cytoskeleton [GO:0015630]; microtubule organizing center [GO:0005815]; midbody [GO:0030496]; mitotic spindle [GO:0072686]	GO:0000226; GO:0000278; GO:0005737; GO:0005815; GO:0005829; GO:0005874; GO:0007017; GO:0007080; GO:0008017; GO:0008608; GO:0015630; GO:0016020; GO:0030496; GO:0043014; GO:0043621; GO:0048487; GO:0051301; GO:0072686	17.1701	17.3775	17.1159	16.9737	17.2783	16.8681	16.8804	16.724	16.6737	16.7626
MEIS1_O00470	-1.45895	-0.829888	-1.36706	-0.350366	-0.281684	0.796318	0.59291	0.623681	1.41066	0.864386	MEIS1	Homeobox protein Meis1;Homeobox protein Meis2;Putative homeobox protein Meis3-like 1;Putative homeobox protein Meis3-like 2;Homeobox protein Meis3	O00470	0.318954	0.000633655	0.0336483	-0.318954	sp|O00470|MEIS1_HUMAN Homeobox protein Meis1 OS=Homo sapiens OX=9606 GN=MEIS1 PE=1 SV=1;sp|O14770|MEIS2_HUMAN Homeobox protein Meis2 OS=Homo sapiens OX=9606 GN=MEIS2 PE=1 SV=2;sp|A6NDR6|ME3L1_HUMAN Putative homeobox protein Meis3-like 1 OS=Homo sapiens OX=	FUNCTION: Acts as a transcriptional regulator of PAX6. Acts as a transcriptional activator of PF4 in complex with PBX1 or PBX2. Required for hematopoiesis, megakaryocyte lineage development and vascular patterning. May function as a cofactor for HOXA7 and HOXA9 in the induction of myeloid leukemias. {ECO:0000269|PubMed:12609849}.	SUBCELLULAR LOCATION: Nucleus {ECO:0000255|PROSITE-ProRule:PRU00108}.	DISEASE: Restless legs syndrome 7 (RLS7) [MIM:612853]: A neurologic sleep/wake disorder characterized by uncomfortable and unpleasant sensations in the legs that appear at rest, usually at night, inducing an irresistible desire to move the legs. The disorder results in nocturnal insomnia and chronic sleep deprivation. The majority of patients also have periodic limb movements in sleep, which are …	angiogenesis [GO:0001525]; animal organ morphogenesis [GO:0009887]; brain development [GO:0007420]; definitive hemopoiesis [GO:0060216]; embryonic pattern specification [GO:0009880]; eye development [GO:0001654]; hemopoiesis [GO:0030097]; lens morphogenesis in camera-type eye [GO:0002089]; locomotory behavior [GO:0007626]; megakaryocyte development [GO:0035855]; negative regulation of myeloid cel…	chromatin binding [GO:0003682]; DNA binding [GO:0003677]; DNA-binding transcription activator activity, RNA polymerase II-specific [GO:0001228]; DNA-binding transcription factor activity, RNA polymerase II-specific [GO:0000981]; RNA polymerase II cis-regulatory region sequence-specific DNA binding [GO:0000978]	chromatin [GO:0000785]; nucleus [GO:0005634]; transcription regulator complex [GO:0005667]	GO:0000785; GO:0000978; GO:0000981; GO:0001228; GO:0001525; GO:0001654; GO:0002089; GO:0003677; GO:0003682; GO:0005634; GO:0005667; GO:0006357; GO:0007420; GO:0007626; GO:0008284; GO:0009880; GO:0009887; GO:0030097; GO:0035855; GO:0045638; GO:0045665; GO:0045944; GO:0060216	14.3949	14.5119	14.412	14.601	14.6138	14.8143	14.7765	14.7822	14.9285	14.8269
THSD4_Q6ZMP0	1.64669	1.37951	0.283894	-0.0302463	0.695951	-1.48328	-0.420627	-0.621556	-0.678171	-0.772163	THSD4	Thrombospondin type-1 domain-containing protein 4	Q6ZMP0	0.676654	0.000636411	0.0336483	0.676654	sp|Q6ZMP0|THSD4_HUMAN Thrombospondin type-1 domain-containing protein 4 OS=Homo sapiens OX=9606 GN=THSD4 PE=2 SV=2	FUNCTION: Promotes FBN1 matrix assembly. Attenuates TGFB signaling, possibly by accelerating the sequestration of large latent complexes of TGFB or active TGFB by FBN1 microfibril assembly, thereby negatively regulating the expression of TGFB regulatory targets, such as POSTN (By similarity). {ECO:0000250}.	SUBCELLULAR LOCATION: Secreted, extracellular space, extracellular matrix {ECO:0000250|UniProtKB:Q3UTY6}.		elastic fiber assembly [GO:0048251]	hydrolase activity [GO:0016787]	collagen-containing extracellular matrix [GO:0062023]; extracellular exosome [GO:0070062]; microfibril [GO:0001527]	GO:0001527; GO:0016787; GO:0048251; GO:0062023; GO:0070062	20.2111	20.0974	19.6312	19.4976	19.8065	18.8793	19.3315	19.246	19.2219	19.1819
RETSAT_Q6NUM9	-0.996775	-1.30709	-0.823222	0.00375734	-0.961539	1.42813	1.47969	0.363617	0.364363	0.449072	RETSAT	All-trans-retinol 13,14-reductase	Q6NUM9	0.443894	0.000637915	0.0336483	-0.443894	sp|Q6NUM9|RETST_HUMAN All-trans-retinol 13,14-reductase OS=Homo sapiens OX=9606 GN=RETSAT PE=1 SV=2	FUNCTION: Catalyzes the saturation of all-trans-retinol to all-trans-13,14-dihydroretinol. Does not exhibit any activity toward all-trans-retinoic acid, nor 9-cis, 11-cis or 13-cis-retinol isomers. May play a role in the metabolism of vitamin A. Independently of retinol conversion, may regulate liver metabolism upstream of MLXIPL/ChREBP. May play a role in adipocyte differentiation. {ECO:0000250|…	SUBCELLULAR LOCATION: Endoplasmic reticulum membrane {ECO:0000250|UniProtKB:Q64FW2}; Peripheral membrane protein {ECO:0000250|UniProtKB:Q64FW2}.		retinol metabolic process [GO:0042572]	all-trans-retinol 13,14-reductase activity [GO:0051786]; oxidoreductase activity [GO:0016491]	endoplasmic reticulum membrane [GO:0005789]; membrane [GO:0016020]; nuclear membrane [GO:0031965]; nuclear outer membrane [GO:0005640]	GO:0005640; GO:0005789; GO:0016020; GO:0016491; GO:0031965; GO:0042572; GO:0051786	17.1142	17.0299	17.1613	17.386	17.1237	17.7729	17.7869	17.4837	17.4839	17.5069
MATN2_O00339	0.713555	1.716	0.0483092	0.084445	1.42579	-0.869106	-0.391754	-1.13731	-0.932095	-0.657841	MATN2	Matrilin-2	O00339	0.617636	0.000649621	0.0336483	0.617636	sp|O00339|MATN2_HUMAN Matrilin-2 OS=Homo sapiens OX=9606 GN=MATN2 PE=1 SV=4	FUNCTION: Involved in matrix assembly. {ECO:0000250}.	SUBCELLULAR LOCATION: Secreted.		extracellular matrix organization [GO:0030198]	calcium ion binding [GO:0005509]; extracellular matrix structural constituent [GO:0005201]	collagen-containing extracellular matrix [GO:0062023]; extracellular matrix [GO:0031012]; extracellular region [GO:0005576]	GO:0005201; GO:0005509; GO:0005576; GO:0030198; GO:0031012; GO:0062023	17.9006	18.2887	17.6431	17.657	18.1764	17.2879	17.4727	17.184	17.2635	17.3696
DACT3_Q96B18	0.449343	1.52968	1.52199	-0.0700996	0.498497	-0.128422	-0.929719	-0.543363	-1.12771	-1.2002	DACT3	Dapper homolog 3	Q96B18	1.00371	0.000650383	0.0336483	1.00371	sp|Q96B18|DACT3_HUMAN Dapper homolog 3 OS=Homo sapiens OX=9606 GN=DACT3 PE=1 SV=2	FUNCTION: May be involved in regulation of intracellular signaling pathways during development. Specifically thought to play a role in canonical and/or non-canonical Wnt signaling pathways through interaction with DSH (Dishevelled) family proteins. {ECO:0000269|PubMed:18538736}.			canonical Wnt signaling pathway [GO:0060070]; epithelial to mesenchymal transition [GO:0001837]; negative regulation of canonical Wnt signaling pathway [GO:0090090]; negative regulation of cell growth [GO:0030308]; negative regulation of epithelial to mesenchymal transition [GO:0010719]; negative regulation of Wnt signaling pathway [GO:0030178]	delta-catenin binding [GO:0070097]; identical protein binding [GO:0042802]; protein kinase A binding [GO:0051018]; protein kinase C binding [GO:0005080]	cytoplasm [GO:0005737]	GO:0001837; GO:0005080; GO:0005737; GO:0010719; GO:0030178; GO:0030308; GO:0042802; GO:0051018; GO:0060070; GO:0070097; GO:0090090	12.7428	13.4327	13.4278	12.4111	12.7742	12.3738	11.8621	12.1089	11.7357	11.6894
ASB11_Q8WXH4	-0.470735	-0.965032	-0.88795	-0.450587	-1.1854	0.89555	-0.488143	1.53398	1.1098	0.908522	ASB11	Ankyrin repeat and SOCS box protein 11	Q8WXH4	0.714219	0.000665694	0.0336483	-0.714219	sp|Q8WXH4|ASB11_HUMAN Ankyrin repeat and SOCS box protein 11 OS=Homo sapiens OX=9606 GN=ASB11 PE=1 SV=1	FUNCTION: May be a substrate-recognition component of a SCF-like ECS (Elongin-Cullin-SOCS-box protein) E3 ubiquitin-protein ligase complex which mediates the ubiquitination and subsequent proteasomal degradation of target proteins. {ECO:0000250}.			intracellular signal transduction [GO:0035556]; positive regulation of protein catabolic process [GO:0045732]; protein ubiquitination [GO:0016567]		cytosol [GO:0005829]; endoplasmic reticulum [GO:0005783]	GO:0005783; GO:0005829; GO:0016567; GO:0035556; GO:0045732	14.1648	13.9419	13.9767	14.1739	13.8426	14.7809	14.157	15.0688	14.8775	14.7868
TNFSF12_O43508	1.31948	1.08829	0.578937	-0.237985	1.1798	-1.47945	-1.22193	-0.388476	-0.188705	-0.649975	TNFSF12	Tumor necrosis factor ligand superfamily member 12;Tumor necrosis factor ligand superfamily member 12, membrane form;Tumor necrosis factor ligand superfamily member 12, secreted form	O43508	0.958969	0.000666375	0.0336483	0.958969	sp|O43508|TNF12_HUMAN Tumor necrosis factor ligand superfamily member 12 OS=Homo sapiens OX=9606 GN=TNFSF12 PE=1 SV=1	FUNCTION: Binds to FN14 and possibly also to TNRFSF12/APO3. Weak inducer of apoptosis in some cell types. Mediates NF-kappa-B activation. Promotes angiogenesis and the proliferation of endothelial cells. Also involved in induction of inflammatory cytokines. Promotes IL8 secretion. {ECO:0000269|PubMed:10085077, ECO:0000269|PubMed:23667509}.	SUBCELLULAR LOCATION: Cell membrane {ECO:0000269|PubMed:12411489}; Single-pass type II membrane protein {ECO:0000269|PubMed:12411489}.; SUBCELLULAR LOCATION: [Tumor necrosis factor ligand superfamily member 12, secreted form]: Secreted.; SUBCELLULAR LOCATION: [Isoform TWE-PRIL]: Cell membrane; Single-pass membrane protein.		angiogenesis [GO:0001525]; apoptotic process [GO:0006915]; apoptotic signaling pathway [GO:0097190]; cell differentiation [GO:0030154]; endothelial cell migration [GO:0043542]; extrinsic apoptotic signaling pathway [GO:0097191]; immune response [GO:0006955]; positive regulation of angiogenesis [GO:0045766]; positive regulation of endothelial cell proliferation [GO:0001938]; positive regulation of…	cytokine activity [GO:0005125]; receptor ligand activity [GO:0048018]; signaling receptor binding [GO:0005102]; tumor necrosis factor receptor binding [GO:0005164]	extracellular region [GO:0005576]; extracellular space [GO:0005615]; integral component of plasma membrane [GO:0005887]; perinuclear region of cytoplasm [GO:0048471]; plasma membrane [GO:0005886]	GO:0001525; GO:0001938; GO:0005102; GO:0005125; GO:0005164; GO:0005576; GO:0005615; GO:0005886; GO:0005887; GO:0006915; GO:0006955; GO:0007165; GO:0030154; GO:0043542; GO:0045732; GO:0045766; GO:0048018; GO:0048471; GO:0097190; GO:0097191; GO:2001238	11.4955	11.3544	11.0436	10.545	11.4102	9.78741	9.94456	10.4532	10.5751	10.2936
LAMB2_P55268	1.21483	1.41116	0.703087	-0.309245	0.997905	-1.04974	-1.17789	-0.230859	-0.472416	-1.08683	LAMB2	Laminin subunit beta-2	P55268	0.530854	0.000666824	0.0336483	0.530854	sp|P55268|LAMB2_HUMAN Laminin subunit beta-2 OS=Homo sapiens OX=9606 GN=LAMB2 PE=1 SV=2	FUNCTION: Binding to cells via a high affinity receptor, laminin is thought to mediate the attachment, migration and organization of cells into tissues during embryonic development by interacting with other extracellular matrix components.	SUBCELLULAR LOCATION: Secreted, extracellular space, extracellular matrix, basement membrane. Note=S-laminin is concentrated in the synaptic cleft of the neuromuscular junction.	DISEASE: Pierson syndrome (PIERSS) [MIM:609049]: Characterized by nephrotic syndrome with neonatal onset, diffuse mesangial sclerosis and eye abnormalities with microcoria as the leading clinical feature. Death usually occurs within the first weeks of life. Disease severity depends on the mutation type: nontruncating LAMB2 mutations may display variable phenotypes ranging from a milder variant of…	animal organ morphogenesis [GO:0009887]; astrocyte development [GO:0014002]; axon extension involved in regeneration [GO:0048677]; axon guidance [GO:0007411]; basement membrane assembly [GO:0070831]; cell migration [GO:0016477]; metanephric glomerular basement membrane development [GO:0072274]; metanephric podocyte development [GO:0072249]; neuromuscular junction development [GO:0007528]; positiv…	extracellular matrix structural constituent [GO:0005201]; integrin binding [GO:0005178]; structural molecule activity [GO:0005198]	basement membrane [GO:0005604]; collagen-containing extracellular matrix [GO:0062023]; endoplasmic reticulum lumen [GO:0005788]; extracellular exosome [GO:0070062]; extracellular region [GO:0005576]; laminin complex [GO:0043256]; laminin-11 complex [GO:0043260]; laminin-3 complex [GO:0005608]; neuromuscular junction [GO:0031594]; protein complex involved in cell-matrix adhesion [GO:0098637]; syna…	GO:0005178; GO:0005198; GO:0005201; GO:0005576; GO:0005604; GO:0005608; GO:0005788; GO:0007411; GO:0007528; GO:0007601; GO:0009887; GO:0009888; GO:0014002; GO:0014044; GO:0016477; GO:0031594; GO:0034446; GO:0043083; GO:0043256; GO:0043260; GO:0045785; GO:0048677; GO:0051149; GO:0060041; GO:0062023; GO:0070062; GO:0070831; GO:0072249; GO:0072274; GO:0098637; GO:0110011; GO:2001046	21.8285	21.8933	21.6594	21.325	21.7568	21.0804	21.0381	21.3509	21.2711	21.0682
CALCOCO2_Q13137	-0.852072	-0.827518	-1.133	0.373463	-1.57556	0.350909	0.850405	1.18626	1.04413	0.582989	CALCOCO2	Calcium-binding and coiled-coil domain-containing protein 2	Q13137	0.536946	0.000666964	0.0336483	-0.536946	sp|Q13137|CACO2_HUMAN Calcium-binding and coiled-coil domain-containing protein 2 OS=Homo sapiens OX=9606 GN=CALCOCO2 PE=1 SV=1	FUNCTION: Xenophagy-specific receptor required for autophagy-mediated intracellular bacteria degradation. Acts as an effector protein of galectin-sensed membrane damage that restricts the proliferation of infecting pathogens such as Salmonella typhimurium upon entry into the cytosol by targeting LGALS8-associated bacteria for autophagy (PubMed:22246324). Initially orchestrates bacteria targeting …	SUBCELLULAR LOCATION: Cytoplasm, perinuclear region {ECO:0000269|PubMed:12869526, ECO:0000269|PubMed:17635994, ECO:0000269|PubMed:9230084}. Cytoplasm, cytoskeleton {ECO:0000269|PubMed:17635994}. Cytoplasmic vesicle, autophagosome membrane {ECO:0000269|PubMed:25771791}; Peripheral membrane protein {ECO:0000305}. Note=According to PubMed:7540613, localizes to nuclear dots. According to PubMed:92300…		positive regulation of autophagosome maturation [GO:1901098]; response to interferon-gamma [GO:0034341]; viral process [GO:0016032]; xenophagy [GO:0098792]	metal ion binding [GO:0046872]; protein homodimerization activity [GO:0042803]	autophagosome [GO:0005776]; autophagosome membrane [GO:0000421]; cytoplasm [GO:0005737]; cytoplasmic vesicle [GO:0031410]; cytoskeleton [GO:0005856]; cytosol [GO:0005829]; intracellular membrane-bounded organelle [GO:0043231]; membrane [GO:0016020]; nucleus [GO:0005634]; perinuclear region of cytoplasm [GO:0048471]; PML body [GO:0016605]	GO:0000421; GO:0005634; GO:0005737; GO:0005776; GO:0005829; GO:0005856; GO:0016020; GO:0016032; GO:0016605; GO:0031410; GO:0034341; GO:0042803; GO:0043231; GO:0046872; GO:0048471; GO:0098792; GO:1901098	16.584	16.5922	16.4901	16.9938	16.3421	16.9862	17.1532	17.2655	17.218	17.0638
PIGN_O95427	1.29075	1.37291	0.887176	-0.359853	0.733955	-0.854931	-1.18047	-0.360657	-0.230305	-1.29857	PIGN	GPI ethanolamine phosphate transferase 1	O95427	0.986253	0.000672189	0.0336483	0.986253	sp|O95427|PIGN_HUMAN GPI ethanolamine phosphate transferase 1 OS=Homo sapiens OX=9606 GN=PIGN PE=1 SV=1	FUNCTION: Ethanolamine phosphate transferase involved in glycosylphosphatidylinositol-anchor biosynthesis. Transfers ethanolamine phosphate to the first alpha-1,4-linked mannose of the glycosylphosphatidylinositol precursor of GPI-anchor (By similarity). May act as suppressor of replication stress and chromosome missegregation. {ECO:0000250, ECO:0000269|PubMed:23446422}.	SUBCELLULAR LOCATION: Endoplasmic reticulum membrane {ECO:0000250}; Multi-pass membrane protein {ECO:0000250}.	DISEASE: Multiple congenital anomalies-hypotonia-seizures syndrome 1 (MCAHS1) [MIM:614080]: An autosomal recessive disorder characterized by neonatal hypotonia, lack of psychomotor development, seizures, dysmorphic features, and variable congenital anomalies involving the cardiac, urinary, and gastrointestinal systems. Most affected individuals die before 3 years of age. {ECO:0000269|PubMed:21493…	GPI anchor biosynthetic process [GO:0006506]; preassembly of GPI anchor in ER membrane [GO:0016254]	mannose-ethanolamine phosphotransferase activity [GO:0051377]	cytosol [GO:0005829]; endoplasmic reticulum membrane [GO:0005789]; integral component of membrane [GO:0016021]; membrane [GO:0016020]; plasma membrane [GO:0005886]	GO:0005789; GO:0005829; GO:0005886; GO:0006506; GO:0016020; GO:0016021; GO:0016254; GO:0051377	15.0947	15.1463	14.8411	14.0578	14.7449	13.7468	13.5422	14.0573	14.1391	13.4681
INPP4B_O15327	1.13466	0.619031	1.11319	-0.19766	1.33593	-0.314325	-0.896124	-0.443354	-0.72645	-1.62489	INPP4B	Type II inositol 3,4-bisphosphate 4-phosphatase	O15327	0.551645	0.000676899	0.0336483	0.551645	sp|O15327|INP4B_HUMAN Inositol polyphosphate 4-phosphatase type II OS=Homo sapiens OX=9606 GN=INPP4B PE=1 SV=4	FUNCTION: Catalyzes the hydrolysis of the 4-position phosphate of phosphatidylinositol 3,4-bisphosphate, inositol 1,3,4-trisphosphate and inositol 3,4-trisphosphate (PubMed:24070612, PubMed:24591580). Plays a role in the late stages of macropinocytosis by dephosphorylating phosphatidylinositol 3,4-bisphosphate in membrane ruffles (PubMed:24591580). The lipid phosphatase activity is critical for t…			inositol phosphate dephosphorylation [GO:0046855]; inositol phosphate metabolic process [GO:0043647]; phosphatidylinositol biosynthetic process [GO:0006661]; phosphatidylinositol dephosphorylation [GO:0046856]; signal transduction [GO:0007165]	inositol-1,3,4-trisphosphate 4-phosphatase activity [GO:0017161]; inositol-3,4-bisphosphate 4-phosphatase activity [GO:0052828]; phosphatidylinositol-3,4-bisphosphate 4-phosphatase activity [GO:0016316]; phosphatidylinositol-4,5-bisphosphate 4-phosphatase activity [GO:0034597]	cytoplasm [GO:0005737]; cytosol [GO:0005829]	GO:0005737; GO:0005829; GO:0006661; GO:0007165; GO:0016316; GO:0017161; GO:0034597; GO:0043647; GO:0046855; GO:0046856; GO:0052828	19.4948	19.3172	19.4874	19.036	19.5641	18.9958	18.7955	18.9514	18.8539	18.5445
DBI_P07108	-0.93093	-1.2166	-1.09221	0.0843798	-0.850475	0.477245	0.316473	0.686654	0.653832	1.87163	DBI	Acyl-CoA-binding protein	P07108	0.546831	0.000682281	0.0336483	-0.546831	sp|P07108|ACBP_HUMAN Acyl-CoA-binding protein OS=Homo sapiens OX=9606 GN=DBI PE=1 SV=2	FUNCTION: Binds medium- and long-chain acyl-CoA esters with very high affinity and may function as an intracellular carrier of acyl-CoA esters. It is also able to displace diazepam from the benzodiazepine (BZD) recognition site located on the GABA type A receptor. It is therefore possible that this protein also acts as a neuropeptide to modulate the action of the GABA receptor.	SUBCELLULAR LOCATION: Endoplasmic reticulum {ECO:0000269|PubMed:17953517, ECO:0000269|PubMed:21698759}. Golgi apparatus {ECO:0000269|PubMed:17953517, ECO:0000269|PubMed:21698759}. Note=Golgi localization is dependent on ligand binding (PubMed:17953517). {ECO:0000269|PubMed:17953517}.		fatty acid metabolic process [GO:0006631]; negative regulation of protein lipidation [GO:1903060]; phosphatidylcholine acyl-chain remodeling [GO:0036151]; positive regulation of CoA-transferase activity [GO:1905920]; positive regulation of phospholipid transport [GO:2001140]	benzodiazepine receptor binding [GO:0030156]; fatty-acyl-CoA binding [GO:0000062]; identical protein binding [GO:0042802]; lipid binding [GO:0008289]; long-chain fatty acyl-CoA binding [GO:0036042]	endoplasmic reticulum [GO:0005783]; endoplasmic reticulum lumen [GO:0005788]; extracellular exosome [GO:0070062]; Golgi apparatus [GO:0005794]; perinuclear endoplasmic reticulum [GO:0097038]; protein-lipid complex [GO:0032994]	GO:0000062; GO:0005783; GO:0005788; GO:0005794; GO:0006631; GO:0008289; GO:0030156; GO:0032994; GO:0036042; GO:0036151; GO:0042802; GO:0070062; GO:0097038; GO:1903060; GO:1905920; GO:2001140	20.3902	20.2927	20.3352	20.7367	20.4176	20.8708	20.8159	20.9422	20.931	21.3466
SZRD1_Q7Z422	-0.962373	-1.4998	-1.14423	-0.183355	-0.498096	0.775084	0.456578	1.17729	0.56995	1.30896	SZRD1	SUZ domain-containing protein 1	Q7Z422	0.312825	0.000685883	0.0336483	-0.312825	sp|Q7Z422|SZRD1_HUMAN SUZ domain-containing protein 1 OS=Homo sapiens OX=9606 GN=SZRD1 PE=1 SV=1								16.4582	16.3602	16.425	16.6003	16.5429	16.7751	16.717	16.8484	16.7377	16.8725
DPM1_O60762	0.749221	1.11138	1.38166	-0.284547	1.18764	-0.630273	-0.419923	-1.15266	-1.05546	-0.887047	DPM1	Dolichol-phosphate mannosyltransferase subunit 1	O60762	0.378399	0.000692854	0.0336483	0.378399	sp|O60762|DPM1_HUMAN Dolichol-phosphate mannosyltransferase subunit 1 OS=Homo sapiens OX=9606 GN=DPM1 PE=1 SV=1	FUNCTION: Transfers mannose from GDP-mannose to dolichol monophosphate to form dolichol phosphate mannose (Dol-P-Man) which is the mannosyl donor in pathways leading to N-glycosylation, glycosyl phosphatidylinositol membrane anchoring, and O-mannosylation of proteins; catalytic subunit of the dolichol-phosphate mannose (DPM) synthase complex. {ECO:0000269|PubMed:10835346}.	SUBCELLULAR LOCATION: Endoplasmic reticulum {ECO:0000305|PubMed:10835346}.	DISEASE: Congenital disorder of glycosylation 1E (CDG1E) [MIM:608799]: A form of congenital disorder of glycosylation, a multisystem disorder caused by a defect in glycoprotein biosynthesis and characterized by under-glycosylated serum glycoproteins. Congenital disorders of glycosylation result in a wide variety of clinical features, such as defects in the nervous system development, psychomotor …	dolichol metabolic process [GO:0019348]; GDP-mannose metabolic process [GO:0019673]; GPI anchor biosynthetic process [GO:0006506]; protein mannosylation [GO:0035268]; protein O-linked mannosylation [GO:0035269]	alcohol binding [GO:0043178]; dolichyl-phosphate beta-D-mannosyltransferase activity [GO:0004582]; dolichyl-phosphate-mannose-protein mannosyltransferase activity [GO:0004169]; mannose binding [GO:0005537]	dolichol-phosphate-mannose synthase complex [GO:0033185]; endoplasmic reticulum [GO:0005783]; endoplasmic reticulum membrane [GO:0005789]; membrane [GO:0016020]; nucleus [GO:0005634]	GO:0004169; GO:0004582; GO:0005537; GO:0005634; GO:0005783; GO:0005789; GO:0006506; GO:0016020; GO:0019348; GO:0019673; GO:0033185; GO:0035268; GO:0035269; GO:0043178	16.9677	17.0503	17.112	16.7318	17.0677	16.6529	16.7009	16.5337	16.5558	16.5943
ULK3_Q6PHR2	-0.648659	-1.59561	0.221988	-0.984244	-0.981215	1.34829	0.727117	0.544684	1.17064	0.197008	ULK3	Serine/threonine-protein kinase ULK3	Q6PHR2	0.577268	0.000702449	0.0336483	-0.577268	sp|Q6PHR2|ULK3_HUMAN Serine/threonine-protein kinase ULK3 OS=Homo sapiens OX=9606 GN=ULK3 PE=1 SV=2	FUNCTION: Serine/threonine protein kinase that acts as a regulator of Sonic hedgehog (SHH) signaling and autophagy. Acts as a negative regulator of SHH signaling in the absence of SHH ligand: interacts with SUFU, thereby inactivating the protein kinase activity and preventing phosphorylation of GLI proteins (GLI1, GLI2 and/or GLI3). Positively regulates SHH signaling in the presence of SHH: disso…	SUBCELLULAR LOCATION: Cytoplasm {ECO:0000269|PubMed:19279323, ECO:0000269|PubMed:19878745}. Note=Localizes to pre-autophagosomal structure during cellular senescence.		autophagosome organization [GO:1905037]; autophagy [GO:0006914]; cellular senescence [GO:0090398]; fibroblast activation [GO:0072537]; negative regulation of smoothened signaling pathway [GO:0045879]; peptidyl-serine phosphorylation [GO:0018105]; positive regulation of smoothened signaling pathway [GO:0045880]; protein autophosphorylation [GO:0046777]; smoothened signaling pathway [GO:0007224]	ATP binding [GO:0005524]; protein serine kinase activity [GO:0106310]; protein serine/threonine kinase activity [GO:0004674]	autophagosome [GO:0005776]; ciliary tip [GO:0097542]; cytoplasm [GO:0005737]; phagophore assembly site [GO:0000407]	GO:0000407; GO:0004674; GO:0005524; GO:0005737; GO:0005776; GO:0006914; GO:0007224; GO:0018105; GO:0045879; GO:0045880; GO:0046777; GO:0072537; GO:0090398; GO:0097542; GO:0106310; GO:1905037	9.32132	8.97862	9.63641	9.19987	9.20097	10.044	9.81922	9.75319	9.97973	9.62737
LGALS3_P17931	-1.04288	-1.47797	-0.790923	0.480539	-1.13739	0.392631	0.626965	0.735	1.24741	0.96662	LGALS3	Galectin-3	P17931	0.634611	0.000703365	0.0336483	-0.634611	sp|P17931|LEG3_HUMAN Galectin-3 OS=Homo sapiens OX=9606 GN=LGALS3 PE=1 SV=5	FUNCTION: Galactose-specific lectin which binds IgE. May mediate with the alpha-3, beta-1 integrin the stimulation by CSPG4 of endothelial cells migration. Together with DMBT1, required for terminal differentiation of columnar epithelial cells during early embryogenesis (By similarity). In the nucleus: acts as a pre-mRNA splicing factor. Involved in acute inflammatory responses including neutroph…	SUBCELLULAR LOCATION: Cytoplasm {ECO:0000269|PubMed:32272059}. Nucleus. Secreted {ECO:0000269|PubMed:32272059}. Note=Secreted by a non-classical secretory pathway and associates with the cell surface. Can be secreted; the secretion is dependent on protein unfolding and facilitated by the cargo receptor TMED10; it results in protein translocation from the cytoplasm into the ERGIC (endoplasmic reti…		antimicrobial humoral immune response mediated by antimicrobial peptide [GO:0061844]; eosinophil chemotaxis [GO:0048245]; epithelial cell differentiation [GO:0030855]; innate immune response [GO:0045087]; killing of cells of another organism [GO:0031640]; macrophage chemotaxis [GO:0048246]; monocyte chemotaxis [GO:0002548]; mononuclear cell migration [GO:0071674]; mRNA processing [GO:0006397]; ne…	carbohydrate binding [GO:0030246]; chemoattractant activity [GO:0042056]; IgE binding [GO:0019863]; laminin binding [GO:0043236]; oligosaccharide binding [GO:0070492]; protein phosphatase binding [GO:0019903]; protein phosphatase inhibitor activity [GO:0004864]; RNA binding [GO:0003723]	cell surface [GO:0009986]; collagen-containing extracellular matrix [GO:0062023]; cytoplasm [GO:0005737]; cytosol [GO:0005829]; extracellular exosome [GO:0070062]; extracellular region [GO:0005576]; extracellular space [GO:0005615]; ficolin-1-rich granule membrane [GO:0101003]; immunological synapse [GO:0001772]; membrane [GO:0016020]; mitochondrial inner membrane [GO:0005743]; nucleoplasm [GO:00…	GO:0001772; GO:0002548; GO:0003723; GO:0004864; GO:0005576; GO:0005615; GO:0005634; GO:0005654; GO:0005681; GO:0005737; GO:0005743; GO:0005829; GO:0005886; GO:0006397; GO:0008380; GO:0009986; GO:0016020; GO:0019863; GO:0019903; GO:0030246; GO:0030593; GO:0030667; GO:0030855; GO:0031334; GO:0031640; GO:0042056; GO:0042129; GO:0043236; GO:0045087; GO:0045806; GO:0048245; GO:0048246; GO:0050860; GO:…	16.8576	16.6836	16.9583	17.4666	16.8198	17.4314	17.5251	17.5683	17.7732	17.6609
BICD1_Q96G01	0.992291	0.410351	0.62347	0.584086	1.36962	-0.013336	-0.0312272	-1.12229	-1.2965	-1.51646	BICD1	Protein bicaudal D homolog 1	Q96G01	0.597978	0.000704163	0.0336483	0.597978	sp|Q96G01|BICD1_HUMAN Protein bicaudal D homolog 1 OS=Homo sapiens OX=9606 GN=BICD1 PE=1 SV=3	FUNCTION: Regulates coat complex coatomer protein I (COPI)-independent Golgi-endoplasmic reticulum transport by recruiting the dynein-dynactin motor complex.	SUBCELLULAR LOCATION: Golgi apparatus.		anatomical structure morphogenesis [GO:0009653]; intracellular mRNA localization [GO:0008298]; microtubule anchoring at microtubule organizing center [GO:0072393]; minus-end-directed organelle transport along microtubule [GO:0072385]; negative regulation of phospholipase C activity [GO:1900275]; negative regulation of phospholipase C-activating G protein-coupled receptor signaling pathway [GO:190…	cytoskeletal anchor activity [GO:0008093]; dynactin binding [GO:0034452]; dynein complex binding [GO:0070840]; dynein intermediate chain binding [GO:0045505]; protein kinase binding [GO:0019901]; proteinase activated receptor binding [GO:0031871]; small GTPase binding [GO:0031267]; structural constituent of cytoskeleton [GO:0005200]	centrosome [GO:0005813]; cytoplasmic vesicle [GO:0031410]; cytoskeleton [GO:0005856]; cytosol [GO:0005829]; Golgi apparatus [GO:0005794]; membrane [GO:0016020]; perinuclear region of cytoplasm [GO:0048471]; secretory vesicle [GO:0099503]; trans-Golgi network [GO:0005802]	GO:0005200; GO:0005794; GO:0005802; GO:0005813; GO:0005829; GO:0005856; GO:0006396; GO:0008093; GO:0008298; GO:0009653; GO:0016020; GO:0016032; GO:0019901; GO:0031267; GO:0031410; GO:0031871; GO:0033365; GO:0034063; GO:0034452; GO:0045505; GO:0048260; GO:0048471; GO:0070507; GO:0070840; GO:0072385; GO:0072393; GO:0099503; GO:1900275; GO:1900276; GO:1900737; GO:1904781	12.3821	12.1635	12.2435	12.2287	12.5238	12.0043	11.9976	11.5877	11.5223	11.4397
CALCOCO1_Q9P1Z2	-0.778773	-1.13041	-1.14687	-0.340257	-0.67981	-0.0728086	0.487052	0.664592	1.65094	1.34634	CALCOCO1	Calcium-binding and coiled-coil domain-containing protein 1	Q9P1Z2	0.431488	0.000708055	0.0336483	-0.431488	sp|Q9P1Z2|CACO1_HUMAN Calcium-binding and coiled-coil domain-containing protein 1 OS=Homo sapiens OX=9606 GN=CALCOCO1 PE=1 SV=2	FUNCTION: Functions as a coactivator for aryl hydrocarbon and nuclear receptors (NR). Recruited to promoters through its contact with the N-terminal basic helix-loop-helix-Per-Arnt-Sim (PAS) domain of transcription factors or coactivators, such as NCOA2. During ER-activation acts synergistically in combination with other NCOA2-binding proteins, such as EP300, CREBBP and CARM1. Involved in the tra…	SUBCELLULAR LOCATION: Cytoplasm. Nucleus. Note=Shuttles between nucleus and cytoplasm. {ECO:0000250}.		intracellular steroid hormone receptor signaling pathway [GO:0030518]; positive regulation of gene expression [GO:0010628]; positive regulation of transcription by RNA polymerase II [GO:0045944]; positive regulation of transcription, DNA-templated [GO:0045893]; signal transduction [GO:0007165]; Wnt signaling pathway [GO:0016055]	armadillo repeat domain binding [GO:0070016]; beta-catenin binding [GO:0008013]; chromatin binding [GO:0003682]; metal ion binding [GO:0046872]; nuclear receptor coactivator activity [GO:0030374]; protein C-terminus binding [GO:0008022]; RNA polymerase II cis-regulatory region sequence-specific DNA binding [GO:0000978]; sequence-specific DNA binding [GO:0043565]; transcription cis-regulatory regi…	chromatin [GO:0000785]; cytosol [GO:0005829]; intracellular membrane-bounded organelle [GO:0043231]; nucleus [GO:0005634]	GO:0000785; GO:0000976; GO:0000978; GO:0003682; GO:0003712; GO:0003713; GO:0005634; GO:0005829; GO:0007165; GO:0008013; GO:0008022; GO:0010628; GO:0016055; GO:0030374; GO:0030518; GO:0043231; GO:0043565; GO:0045893; GO:0045944; GO:0046872; GO:0070016	17.8446	17.7515	17.7471	17.9606	17.8708	18.0314	18.1796	18.2265	18.4876	18.407
STAT3_P40763	-0.84087	-0.301059	-0.834819	-1.02787	-1.04381	0.250411	-0.0565748	0.837266	1.65059	1.36673	STAT3	Signal transducer and activator of transcription 3	P40763	0.457791	0.000724163	0.0341625	-0.457791	sp|P40763|STAT3_HUMAN Signal transducer and activator of transcription 3 OS=Homo sapiens OX=9606 GN=STAT3 PE=1 SV=2	FUNCTION: Signal transducer and transcription activator that mediates cellular responses to interleukins, KITLG/SCF, LEP and other growth factors (PubMed:10688651, PubMed:12359225, PubMed:12873986, PubMed:15194700, PubMed:17344214, PubMed:18242580, PubMed:22306293, PubMed:23084476). Once activated, recruits coactivators, such as NCOA1 or MED1, to the promoter region of the target gene (PubMed:173…	SUBCELLULAR LOCATION: Cytoplasm {ECO:0000269|PubMed:28065600, ECO:0000269|PubMed:31899195}. Nucleus {ECO:0000269|PubMed:28065600, ECO:0000269|PubMed:31899195}. Note=Shuttles between the nucleus and the cytoplasm. Translocated into the nucleus upon tyrosine phosphorylation and dimerization, in response to signaling by activated FGFR1, FGFR2, FGFR3 or FGFR4. Constitutive nuclear presence is indepen…	DISEASE: Hyper-IgE recurrent infection syndrome 1, autosomal dominant (HIES1) [MIM:147060]: A rare disorder of immunity and connective tissue characterized by immunodeficiency, chronic eosinophilia, distinctive coarse facial appearance, abnormal dentition, hyperextensibility of the joints, and bone fractures. {ECO:0000269|PubMed:17676033, ECO:0000269|PubMed:17881745, ECO:0000269|PubMed:23342295, …	astrocyte differentiation [GO:0048708]; cell population proliferation [GO:0008283]; cellular response to hormone stimulus [GO:0032870]; cellular response to interleukin-17 [GO:0097398]; cellular response to leptin stimulus [GO:0044320]; cytokine-mediated signaling pathway [GO:0019221]; defense response [GO:0006952]; eating behavior [GO:0042755]; energy homeostasis [GO:0097009]; eye photoreceptor …	chromatin DNA binding [GO:0031490]; DNA binding [GO:0003677]; DNA-binding transcription activator activity, RNA polymerase II-specific [GO:0001228]; DNA-binding transcription factor activity [GO:0003700]; DNA-binding transcription factor activity, RNA polymerase II-specific [GO:0000981]; DNA-binding transcription factor binding [GO:0140297]; identical protein binding [GO:0042802]; nuclear recepto…	chromatin [GO:0000785]; cytoplasm [GO:0005737]; cytosol [GO:0005829]; nucleoplasm [GO:0005654]; nucleus [GO:0005634]; plasma membrane [GO:0005886]; RNA polymerase II transcription regulator complex [GO:0090575]; transcription regulator complex [GO:0005667]	GO:0000122; GO:0000785; GO:0000976; GO:0000978; GO:0000981; GO:0001228; GO:0001659; GO:0001754; GO:0003677; GO:0003700; GO:0004879; GO:0005102; GO:0005634; GO:0005654; GO:0005667; GO:0005737; GO:0005829; GO:0005886; GO:0006355; GO:0006357; GO:0006606; GO:0006952; GO:0006954; GO:0007165; GO:0007179; GO:0007259; GO:0007399; GO:0008283; GO:0008285; GO:0010507; GO:0010628; GO:0010629; GO:0016310; GO:…	19.4743	19.6269	19.4761	19.4215	19.417	19.7828	19.6961	19.9487	20.1787	20.0984
PTP4A2_Q12974	-0.689898	-1.45577	-1.48355	-0.430728	-0.0663131	0.375139	0.99532	0.774882	0.590384	1.39053	PTP4A2	Protein tyrosine phosphatase type IVA 2	Q12974	0.382844	0.000735827	0.0344612	-0.382844	sp|Q12974|TP4A2_HUMAN Protein tyrosine phosphatase type IVA 2 OS=Homo sapiens OX=9606 GN=PTP4A2 PE=1 SV=1	FUNCTION: Protein tyrosine phosphatase which stimulates progression from G1 into S phase during mitosis. Promotes tumors. Inhibits geranylgeranyl transferase type II activity by blocking the association between RABGGTA and RABGGTB. {ECO:0000269|PubMed:14643450}.	SUBCELLULAR LOCATION: Cell membrane. Early endosome. Cytoplasm.		protein dephosphorylation [GO:0006470]	prenylated protein tyrosine phosphatase activity [GO:0004727]; protein tyrosine phosphatase activity [GO:0004725]; protein tyrosine/serine/threonine phosphatase activity [GO:0008138]	cytoplasm [GO:0005737]; cytosol [GO:0005829]; early endosome [GO:0005769]; nucleus [GO:0005634]; plasma membrane [GO:0005886]	GO:0004725; GO:0004727; GO:0005634; GO:0005737; GO:0005769; GO:0005829; GO:0005886; GO:0006470; GO:0008138	15.7233	15.5456	15.5392	15.7834	15.8679	15.9703	16.1142	16.063	16.0203	16.2059
TBC1D14_Q9P2M4	0.176733	-0.737165	-1.44958	-1.32393	-0.610444	0.287794	0.767493	1.48259	1.1153	0.291204	TBC1D14	TBC1 domain family member 14	Q9P2M4	0.688197	0.000746647	0.0345458	-0.688197	sp|Q9P2M4|TBC14_HUMAN TBC1 domain family member 14 OS=Homo sapiens OX=9606 GN=TBC1D14 PE=1 SV=3	FUNCTION: Plays a role in the regulation of starvation-induced autophagosome formation (PubMed:22613832). Together with the TRAPPIII complex, regulates a constitutive trafficking step from peripheral recycling endosomes to the early Golgi, maintaining the cycling pool of ATG9 required for initiation of autophagy. {ECO:0000269|PubMed:22613832, ECO:0000269|PubMed:26711178}.	SUBCELLULAR LOCATION: Golgi apparatus, cis-Golgi network {ECO:0000269|PubMed:22613832, ECO:0000269|PubMed:26711178}. Golgi apparatus, trans-Golgi network {ECO:0000269|PubMed:22613832}. Note=After amino acid starvation, Golgi apparatus-associated protein levels increase compared with fed conditions. May be cycling between the Golgi apparatus and an endosomal pool, redistributing to the Golgi appar…		activation of GTPase activity [GO:0090630]; autophagy [GO:0006914]; negative regulation of autophagy [GO:0010507]; recycling endosome to Golgi transport [GO:0071955]; regulation of autophagosome assembly [GO:2000785]	GTPase activator activity [GO:0005096]; protein kinase binding [GO:0019901]	autophagosome [GO:0005776]; cytosol [GO:0005829]; Golgi apparatus [GO:0005794]; intracellular membrane-bounded organelle [GO:0043231]; nucleoplasm [GO:0005654]; recycling endosome [GO:0055037]	GO:0005096; GO:0005654; GO:0005776; GO:0005794; GO:0005829; GO:0006914; GO:0010507; GO:0019901; GO:0043231; GO:0055037; GO:0071955; GO:0090630; GO:2000785	11.1811	10.7824	10.4717	10.5265	10.8377	11.2295	11.4388	11.7507	11.5905	11.231
ZNF362_Q5T0B9	0.101781	1.91998	0.711103	0.33373	0.923863	-0.544585	-0.636724	-0.876335	-1.46387	-0.468942	ZNF362	Zinc finger protein 362;Zinc finger protein 384	Q5T0B9	0.541281	0.000750591	0.0345458	0.541281	sp|Q5T0B9|ZN362_HUMAN Zinc finger protein 362 OS=Homo sapiens OX=9606 GN=ZNF362 PE=1 SV=1;sp|Q8TF68|ZN384_HUMAN Zinc finger protein 384 OS=Homo sapiens OX=9606 GN=ZNF384 PE=1 SV=2	FUNCTION: May be involved in transcriptional regulation.	SUBCELLULAR LOCATION: Nucleus {ECO:0000305}.		regulation of transcription by RNA polymerase II [GO:0006357]	DNA-binding transcription factor activity [GO:0003700]; metal ion binding [GO:0046872]; RNA polymerase II cis-regulatory region sequence-specific DNA binding [GO:0000978]	nucleus [GO:0005634]	GO:0000978; GO:0003700; GO:0005634; GO:0006357; GO:0046872	11.8272	12.4437	12.0338	11.9058	12.1059	11.608	11.5767	11.4955	11.2962	11.6336
RHBDF1_Q96CC6	1.01869	0.853677	0.56668	0.108063	1.66888	-1.2144	-1.0338	-0.547677	-0.346928	-1.07318	RHBDF1	Inactive rhomboid protein 1	Q96CC6	0.329811	0.000769878	0.0345458	0.329811	sp|Q96CC6|RHDF1_HUMAN Inactive rhomboid protein 1 OS=Homo sapiens OX=9606 GN=RHBDF1 PE=1 SV=2	FUNCTION: Regulates ADAM17 protease, a sheddase of the epidermal growth factor (EGF) receptor ligands and TNF, thereby plays a role in sleep, cell survival, proliferation, migration and inflammation. Does not exhibit any protease activity on its own. {ECO:0000269|PubMed:15965977, ECO:0000269|PubMed:18524845, ECO:0000269|PubMed:18832597, ECO:0000269|PubMed:21439629}.	SUBCELLULAR LOCATION: Endoplasmic reticulum membrane {ECO:0000269|PubMed:15965977, ECO:0000269|PubMed:18832597, ECO:0000269|PubMed:21439629}; Multi-pass membrane protein {ECO:0000255}. Golgi apparatus membrane {ECO:0000269|PubMed:15965977, ECO:0000269|PubMed:18832597}; Multi-pass membrane protein {ECO:0000255}. Note=Predominantly localized in the endoplasmic reticulum membrane (PubMed:15965977). …		cell migration [GO:0016477]; cell population proliferation [GO:0008283]; negative regulation of protein secretion [GO:0050709]; protein transport [GO:0015031]; regulation of epidermal growth factor receptor signaling pathway [GO:0042058]; regulation of proteasomal protein catabolic process [GO:0061136]; regulation of protein secretion [GO:0050708]	growth factor binding [GO:0019838]	endoplasmic reticulum membrane [GO:0005789]; Golgi membrane [GO:0000139]; integral component of membrane [GO:0016021]	GO:0000139; GO:0005789; GO:0008283; GO:0015031; GO:0016021; GO:0016477; GO:0019838; GO:0042058; GO:0050708; GO:0050709; GO:0061136	14.4986	14.4663	14.4102	14.3205	14.6258	14.0619	14.0972	14.1923	14.2315	14.0895
IGFBP7_Q16270	1.18434	1.52772	0.053615	-0.0364631	1.25882	-0.484667	-1.03773	-1.11038	-0.352433	-1.00281	IGFBP7	Insulin-like growth factor-binding protein 7	Q16270	0.535553	0.000771026	0.0345458	0.535553	sp|Q16270|IBP7_HUMAN Insulin-like growth factor-binding protein 7 OS=Homo sapiens OX=9606 GN=IGFBP7 PE=1 SV=1	FUNCTION: Binds IGF-I and IGF-II with a relatively low affinity. Stimulates prostacyclin (PGI2) production. Stimulates cell adhesion. {ECO:0000269|PubMed:8117260, ECO:0000269|PubMed:8939990}.	SUBCELLULAR LOCATION: Secreted.	DISEASE: Retinal arterial macroaneurysm with supravalvular pulmonic stenosis (RAMSVPS) [MIM:614224]: An autosomal recessive condition characterized by the bilateral appearance of 'beading' along the major retinal arterial trunks, with the subsequent formation of macroaneurysms. Affected individuals also have supravalvular pulmonic stenosis, often requiring surgical correction. {ECO:0000269|PubMed…	cell adhesion [GO:0007155]; cellular response to hormone stimulus [GO:0032870]; embryo implantation [GO:0007566]; negative regulation of cell population proliferation [GO:0008285]; regulation of cell growth [GO:0001558]; regulation of signal transduction [GO:0009966]; regulation of steroid biosynthetic process [GO:0050810]; response to cortisol [GO:0051414]; response to heat [GO:0009408]; respons…	insulin-like growth factor binding [GO:0005520]	collagen-containing extracellular matrix [GO:0062023]; endoplasmic reticulum lumen [GO:0005788]; extracellular exosome [GO:0070062]; extracellular region [GO:0005576]; extracellular space [GO:0005615]	GO:0001558; GO:0005520; GO:0005576; GO:0005615; GO:0005788; GO:0007155; GO:0007566; GO:0008285; GO:0009408; GO:0009966; GO:0032526; GO:0032870; GO:0050810; GO:0051414; GO:0062023; GO:0070062	18.8205	18.9358	18.4409	18.4106	18.8455	18.2601	18.0745	18.0501	18.3045	18.0862
KIAA0556_O60303	-0.544602	-0.952325	-0.152003	-0.788936	-1.75786	0.570371	0.949599	1.08115	0.353689	1.24091	KIAA0556	Uncharacterized protein KIAA0556	O60303	0.33844	0.000771028	0.0345458	-0.33844	sp|O60303|KATIP_HUMAN Katanin-interacting protein OS=Homo sapiens OX=9606 GN=KATNIP PE=1 SV=4	FUNCTION: May influence the stability of microtubules (MT), possibly through interaction with the MT-severing katanin complex. {ECO:0000269|PubMed:26714646}.	SUBCELLULAR LOCATION: Cytoplasm, cytoskeleton, cilium axoneme {ECO:0000269|PubMed:26714646}. Cytoplasm, cytoskeleton, cilium basal body {ECO:0000269|PubMed:26714646}. Cytoplasm, cytoskeleton {ECO:0000269|PubMed:26714646}. Note=When overexpressed, localizes to the cytoplasm where it associates with acetylated alpha-tubulin. {ECO:0000269|PubMed:26714646}.	DISEASE: Joubert syndrome 26 (JBTS26) [MIM:616784]: A form of Joubert syndrome, a disorder presenting with cerebellar ataxia, oculomotor apraxia, hypotonia, neonatal breathing abnormalities and psychomotor delay. Neuroradiologically, it is characterized by cerebellar vermian hypoplasia/aplasia, thickened and reoriented superior cerebellar peduncles, and an abnormally large interpeduncular fossa, …	cerebrospinal fluid circulation [GO:0090660]		cell projection [GO:0042995]; cytoplasm [GO:0005737]; cytoskeleton [GO:0005856]; extracellular space [GO:0005615]	GO:0005615; GO:0005737; GO:0005856; GO:0042995; GO:0090660	11.8317	11.7495	11.9109	11.7825	11.5871	12.0566	12.1331	12.1596	12.0129	12.1918
MYO18B_Q8IUG5	0.991714	0.832998	1.6523	-0.187751	0.666297	-0.408061	-0.669579	-0.823043	-0.431703	-1.62317	MYO18B	Unconventional myosin-XVIIIb	Q8IUG5	0.612066	0.000782629	0.0345458	0.612066	sp|Q8IUG5|MY18B_HUMAN Unconventional myosin-XVIIIb OS=Homo sapiens OX=9606 GN=MYO18B PE=1 SV=2	FUNCTION: May be involved in intracellular trafficking of the muscle cell when in the cytoplasm, whereas entering the nucleus, may be involved in the regulation of muscle specific genes. May play a role in the control of tumor development and progression; restored MYO18B expression in lung cancer cells suppresses anchorage-independent growth.	SUBCELLULAR LOCATION: Cytoplasm. Nucleus. Cytoplasm, myofibril, sarcomere. Note=Punctate pattern in undifferentiated myoblasts. Nuclear, on primary cardiomyocytes and adult muscle. A partial sarcomeric location was found in some cardiomyocytes.	DISEASE: Klippel-Feil syndrome 4, autosomal recessive, with nemaline myopathy and facial dysmorphism (KFS4) [MIM:616549]: A form of Klippel-Feil syndrome, a skeletal disorder characterized by congenital fusion of cervical vertebrae. It is due to a failure in the normal segmentation of vertebrae during the early weeks of fetal development. The clinical triad consists of short neck, low posterior h…	actomyosin structure organization [GO:0031032]; cardiac muscle cell development [GO:0055013]; in utero embryonic development [GO:0001701]; vasculogenesis [GO:0001570]	actin filament binding [GO:0051015]; ATP binding [GO:0005524]; cytoskeletal motor activity [GO:0003774]	filamentous actin [GO:0031941]; myosin filament [GO:0032982]; myosin II complex [GO:0016460]; nucleus [GO:0005634]; unconventional myosin complex [GO:0016461]; Z disc [GO:0030018]	GO:0001570; GO:0001701; GO:0003774; GO:0005524; GO:0005634; GO:0016460; GO:0016461; GO:0030018; GO:0031032; GO:0031941; GO:0032982; GO:0051015; GO:0055013	20.646	20.5846	20.9015	20.1897	20.5201	20.1045	20.0033	19.9439	20.0953	19.6344
ILDR2_Q71H61	1.17143	1.57026	0.529407	-0.282298	0.890099	-1.01968	-0.756481	0.0672057	-0.945503	-1.22444	ILDR2	Immunoglobulin-like domain-containing receptor 2	Q71H61	1.44744	0.00078435	0.0345458	1.44744	sp|Q71H61|ILDR2_HUMAN Immunoglobulin-like domain-containing receptor 2 OS=Homo sapiens OX=9606 GN=ILDR2 PE=1 SV=1	FUNCTION: May be involved in ER stress pathways with effects on lipid homeostasis and insulin secretion. With ILDR1 and LSR, involved in the maintain of the epithelial barrier function through the recruitment of MARVELD2/tricellulin to tricellular tight junctions (By similarity). Also functions as a B7-like protein family member expressed on immune cells and inflamed tissue and with T-cell inhibi…	SUBCELLULAR LOCATION: Endoplasmic reticulum membrane {ECO:0000250|UniProtKB:B5TVM2}; Single-pass type I membrane protein {ECO:0000250|UniProtKB:B5TVM2}. Cell junction, tight junction {ECO:0000250|UniProtKB:B5TVM2}. Nucleus {ECO:0000250|UniProtKB:B5TVM2}.		cell differentiation [GO:0030154]; homeostasis of number of cells within a tissue [GO:0048873]; insulin secretion [GO:0030073]; negative regulation of T cell activation [GO:0050868]; pancreas development [GO:0031016]; regulation of RNA splicing [GO:0043484]; response to glucose [GO:0009749]		bicellular tight junction [GO:0005923]; endoplasmic reticulum membrane [GO:0005789]; integral component of membrane [GO:0016021]; membrane [GO:0016020]; nucleus [GO:0005634]; tight junction [GO:0070160]	GO:0005634; GO:0005789; GO:0005923; GO:0009749; GO:0016020; GO:0016021; GO:0030073; GO:0030154; GO:0031016; GO:0043484; GO:0048873; GO:0050868; GO:0070160	11.8205	12.1925	11.2215	10.4643	11.558	9.77639	10.0219	10.7903	9.84559	9.58537
ABHD5_Q8WTS1	-1.46087	-0.943981	-0.633174	0.0385064	-0.950741	1.42774	0.57034	1.18067	-0.167923	0.939433	ABHD5	1-acylglycerol-3-phosphate O-acyltransferase ABHD5	Q8WTS1	0.622766	0.000791207	0.0345458	-0.622766	sp|Q8WTS1|ABHD5_HUMAN 1-acylglycerol-3-phosphate O-acyltransferase ABHD5 OS=Homo sapiens OX=9606 GN=ABHD5 PE=1 SV=1	FUNCTION: Coenzyme A-dependent lysophosphatidic acid acyltransferase that catalyzes the transfert of an acyl group on a lysophosphatidic acid (PubMed:18606822). Functions preferentially with 1-oleoyl-lysophosphatidic acid followed by 1-palmitoyl-lysophosphatidic acid, 1-stearoyl-lysophosphatidic acid and 1-arachidonoyl-lysophosphatidic acid as lipid acceptor. Functions preferentially with arachid…	SUBCELLULAR LOCATION: Cytoplasm {ECO:0000269|PubMed:18832586}. Lipid droplet {ECO:0000250|UniProtKB:Q9DBL9}. Cytoplasm, cytosol {ECO:0000250|UniProtKB:Q9DBL9}. Note=Colocalized with PLIN and ADRP on the surface of lipid droplets. The localization is dependent upon the metabolic status of the adipocytes and the activity of PKA (By similarity). {ECO:0000250}.	DISEASE: Chanarin-Dorfman syndrome (CDS) [MIM:275630]: An autosomal recessive inborn error of lipid metabolism with multisystemic accumulation of triglycerides although plasma concentrations are normal. Clinical characteristics are congenital generalized ichthyosis, vacuolated leukocytes, hepatomegaly, myopathy, cataracts, neurosensory hearing loss and developmental delay. The disorder presents a…	cell differentiation [GO:0030154]; fatty acid metabolic process [GO:0006631]; lipid homeostasis [GO:0055088]; negative regulation of sequestering of triglyceride [GO:0010891]; phosphatidic acid biosynthetic process [GO:0006654]; positive regulation of lipoprotein lipase activity [GO:0051006]; positive regulation of triglyceride catabolic process [GO:0010898]	1-acylglycerol-3-phosphate O-acyltransferase activity [GO:0003841]; carboxylic ester hydrolase activity [GO:0052689]; lysophosphatidic acid acyltransferase activity [GO:0042171]	cytosol [GO:0005829]; intracellular membrane-bounded organelle [GO:0043231]; lipid droplet [GO:0005811]; mitochondrion [GO:0005739]; nucleoplasm [GO:0005654]	GO:0003841; GO:0005654; GO:0005739; GO:0005811; GO:0005829; GO:0006631; GO:0006654; GO:0010891; GO:0010898; GO:0030154; GO:0042171; GO:0043231; GO:0051006; GO:0052689; GO:0055088	13.7999	14.0037	14.1262	14.3909	14.001	14.9384	14.6005	14.8411	14.3095	14.746
HAPLN3_Q96S86	1.97352	0.416946	0.251659	0.0256745	1.20579	-1.21727	-0.402552	-0.970055	-0.690309	-0.593404	HAPLN3	Hyaluronan and proteoglycan link protein 3;Hyaluronan and proteoglycan link protein 4	Q96S86	1.64121	0.000792103	0.0345458	1.64121	sp|Q96S86|HPLN3_HUMAN Hyaluronan and proteoglycan link protein 3 OS=Homo sapiens OX=9606 GN=HAPLN3 PE=2 SV=1;sp|Q86UW8|HPLN4_HUMAN Hyaluronan and proteoglycan link protein 4 OS=Homo sapiens OX=9606 GN=HAPLN4 PE=2 SV=1	FUNCTION: May function in hyaluronic acid binding. {ECO:0000303|PubMed:12663660}.	SUBCELLULAR LOCATION: Secreted, extracellular space, extracellular matrix {ECO:0000250}.		cell adhesion [GO:0007155]; central nervous system development [GO:0007417]; positive regulation of cell population proliferation [GO:0008284]; response to estrogen [GO:0043627]; skeletal system development [GO:0001501]	hyaluronic acid binding [GO:0005540]	extracellular matrix [GO:0031012]; extracellular space [GO:0005615]	GO:0001501; GO:0005540; GO:0005615; GO:0007155; GO:0007417; GO:0008284; GO:0031012; GO:0043627	15.2478	13.599	13.4239	13.1846	14.4346	11.868	12.731	12.1299	12.4262	12.5288
FMO3_P31513	-0.241268	0.679411	0.646245	1.18535	1.64334	-0.833944	-0.595846	-1.47388	-0.169526	-0.839881	FMO3	Dimethylaniline monooxygenase [N-oxide-forming] 3	P31513	0.802153	0.000796162	0.0345458	0.802153	sp|P31513|FMO3_HUMAN Dimethylaniline monooxygenase [N-oxide-forming] 3 OS=Homo sapiens OX=9606 GN=FMO3 PE=1 SV=5	FUNCTION: Essential hepatic enzyme that catalyzes the oxygenation of a wide variety of nitrogen- and sulfur-containing compounds including drugs as well as dietary compounds (PubMed:10759686, PubMed:30381441). Plays an important role in the metabolism of trimethylamine (TMA), via the production of trimethylamine N-oxide (TMAO) metabolite (PubMed:9776311). TMA is generated by the action of gut mic…	SUBCELLULAR LOCATION: Microsome membrane {ECO:0000250|UniProtKB:P32417}; Single-pass membrane protein {ECO:0000255}. Endoplasmic reticulum membrane {ECO:0000250|UniProtKB:P32417}; Single-pass membrane protein {ECO:0000255}.	DISEASE: Trimethylaminuria (TMAU) [MIM:602079]: Inborn error of metabolism associated with an offensive body odor and caused by deficiency of FMO-mediated N-oxidation of amino-trimethylamine (TMA) derived from foodstuffs. Affected individuals excrete relatively large amounts of TMA in their urine, sweat, and breath, and exhibit a fishy body odor characteristic of the malodorous free amine. {ECO:0…		flavin adenine dinucleotide binding [GO:0050660]; monooxygenase activity [GO:0004497]; N,N-dimethylaniline monooxygenase activity [GO:0004499]; NADP binding [GO:0050661]; trimethylamine monooxygenase activity [GO:0034899]	endoplasmic reticulum membrane [GO:0005789]; integral component of membrane [GO:0016021]; intracellular membrane-bounded organelle [GO:0043231]	GO:0004497; GO:0004499; GO:0005789; GO:0016021; GO:0034899; GO:0043231; GO:0050660; GO:0050661	14.4347	14.9066	14.8896	15.1658	15.4006	14.131	14.253	13.803	14.4715	14.1279
BOLA1_Q9Y3E2	-0.598958	-1.33511	-1.16222	-0.207005	-0.712361	1.49528	0.5475	1.42048	0.630961	-0.0785639	BOLA1	BolA-like protein 1	Q9Y3E2	0.476665	0.00079643	0.0345458	-0.476665	sp|Q9Y3E2|BOLA1_HUMAN BolA-like protein 1 OS=Homo sapiens OX=9606 GN=BOLA1 PE=1 SV=1	FUNCTION: Acts as a mitochondrial iron-sulfur (Fe-S) cluster assembly factor that facilitates (Fe-S) cluster insertion into a subset of mitochondrial proteins (By similarity). Probably acts together with the monothiol glutaredoxin GLRX5 (PubMed:27532772). May protect cells against oxidative stress (PubMed:22746225). {ECO:0000250|UniProtKB:Q3E793, ECO:0000269|PubMed:22746225, ECO:0000305|PubMed:27…	SUBCELLULAR LOCATION: Mitochondrion {ECO:0000269|PubMed:22746225}.		cell redox homeostasis [GO:0045454]; iron ion homeostasis [GO:0055072]; iron-sulfur cluster assembly [GO:0016226]		iron-sulfur cluster assembly complex [GO:1990229]; mitochondrion [GO:0005739]	GO:0005739; GO:0016226; GO:0045454; GO:0055072; GO:1990229	15.4622	15.2438	15.2951	15.5785	15.4286	16.0837	15.8024	16.0615	15.8272	15.6167
LILRB5_O75023	-1.36037	-0.543389	-1.40071	-0.109251	-0.498505	0.569086	0.623415	1.86576	0.235291	0.618683	LILRB5	Leukocyte immunoglobulin-like receptor subfamily B member 5	O75023	0.798533	0.000801986	0.0345549	-0.798533	sp|O75023|LIRB5_HUMAN Leukocyte immunoglobulin-like receptor subfamily B member 5 OS=Homo sapiens OX=9606 GN=LILRB5 PE=1 SV=2	FUNCTION: May act as receptor for class I MHC antigens.	SUBCELLULAR LOCATION: Membrane; Single-pass type I membrane protein.		adaptive immune response [GO:0002250]; cell surface receptor signaling pathway [GO:0007166]; cytokine-mediated signaling pathway [GO:0019221]; defense response [GO:0006952]	inhibitory MHC class I receptor activity [GO:0032396]; transmembrane signaling receptor activity [GO:0004888]	integral component of membrane [GO:0016021]; plasma membrane [GO:0005886]	GO:0002250; GO:0004888; GO:0005886; GO:0006952; GO:0007166; GO:0016021; GO:0019221; GO:0032396	14.7323	15.1492	14.7117	15.3707	15.1721	15.7168	15.7446	16.3785	15.5465	15.7421
RTN1_Q16799	1.33371	1.60672	0.455503	-0.41339	0.946725	-0.662263	-0.632679	-0.963655	-0.517595	-1.15308	RTN1	Reticulon-1	Q16799	0.690056	0.000808583	0.0346084	0.690056	sp|Q16799|RTN1_HUMAN Reticulon-1 OS=Homo sapiens OX=9606 GN=RTN1 PE=1 SV=1	FUNCTION: Inhibits amyloid precursor protein processing, probably by blocking BACE1 activity. {ECO:0000269|PubMed:15286784}.	SUBCELLULAR LOCATION: Endoplasmic reticulum membrane {ECO:0000269|PubMed:12873973}; Multi-pass membrane protein {ECO:0000255}. Golgi apparatus membrane {ECO:0000269|PubMed:12873973}; Multi-pass membrane protein {ECO:0000255}.		negative regulation of amyloid-beta formation [GO:1902430]; neuron differentiation [GO:0030182]		dendrite [GO:0030425]; endoplasmic reticulum [GO:0005783]; endoplasmic reticulum membrane [GO:0005789]; Golgi membrane [GO:0000139]; integral component of endoplasmic reticulum membrane [GO:0030176]; neuronal cell body [GO:0043025]	GO:0000139; GO:0005783; GO:0005789; GO:0030176; GO:0030182; GO:0030425; GO:0043025; GO:1902430	16.3284	16.4483	15.9428	15.5613	16.1585	15.4521	15.465	15.3197	15.5156	15.2366
EPHB4_P54760	1.15748	1.52673	1.18194	-0.574405	0.597761	-1.12442	-0.518787	-0.889272	-0.685079	-0.671944	EPHB4	Ephrin type-B receptor 4	P54760	1.00351	0.000815145	0.0346193	1.00351	sp|P54760|EPHB4_HUMAN Ephrin type-B receptor 4 OS=Homo sapiens OX=9606 GN=EPHB4 PE=1 SV=2	FUNCTION: Receptor tyrosine kinase which binds promiscuously transmembrane ephrin-B family ligands residing on adjacent cells, leading to contact-dependent bidirectional signaling into neighboring cells. The signaling pathway downstream of the receptor is referred to as forward signaling while the signaling pathway downstream of the ephrin ligand is referred to as reverse signaling. Together with…	SUBCELLULAR LOCATION: Cell membrane {ECO:0000269|PubMed:28687708, ECO:0000269|PubMed:8188704}; Single-pass type I membrane protein {ECO:0000269|PubMed:8188704}.	DISEASE: Lymphatic malformation 7 (LMPHM7) [MIM:617300]: A form of primary lymphedema, a disease characterized by swelling of body parts due to developmental anomalies and functional defects of the lymphatic system. Patients with lymphedema may suffer from recurrent local infections. LMPHM7 is an autosomal dominant form with variable expressivity. Some individuals present with severe non-immune h…	angiogenesis [GO:0001525]; axon guidance [GO:0007411]; cell adhesion [GO:0007155]; cell migration involved in sprouting angiogenesis [GO:0002042]; ephrin receptor signaling pathway [GO:0048013]; heart morphogenesis [GO:0003007]; positive regulation of kinase activity [GO:0033674]; protein autophosphorylation [GO:0046777]; transmembrane receptor protein tyrosine kinase signaling pathway [GO:000716…	ATP binding [GO:0005524]; ephrin receptor activity [GO:0005003]; transmembrane receptor protein tyrosine kinase activity [GO:0004714]; transmembrane-ephrin receptor activity [GO:0005005]	cytosol [GO:0005829]; extracellular exosome [GO:0070062]; extracellular region [GO:0005576]; integral component of plasma membrane [GO:0005887]; neuron projection [GO:0043005]; plasma membrane [GO:0005886]; receptor complex [GO:0043235]	GO:0001525; GO:0002042; GO:0003007; GO:0004714; GO:0005003; GO:0005005; GO:0005524; GO:0005576; GO:0005829; GO:0005886; GO:0005887; GO:0007155; GO:0007169; GO:0007411; GO:0033674; GO:0043005; GO:0043235; GO:0046777; GO:0048013; GO:0070062	14.6463	14.8845	14.6621	13.5292	14.2853	13.1744	13.5651	13.3261	13.4578	13.4663
C16orf58_Q96GQ5	1.14963	0.887581	1.0829	-0.567471	1.38918	-0.494042	-0.47735	-0.81048	-1.03248	-1.12747	C16orf58	RUS1 family protein C16orf58	Q96GQ5	0.629015	0.000819551	0.0346193	0.629015	sp|Q96GQ5|RUSF1_HUMAN RUS family member 1 OS=Homo sapiens OX=9606 GN=RUSF1 PE=1 SV=2		SUBCELLULAR LOCATION: Membrane {ECO:0000305}; Single-pass membrane protein {ECO:0000305}.				integral component of membrane [GO:0016021]; membrane [GO:0016020]	GO:0016020; GO:0016021	17.4063	17.3017	17.3796	16.7212	17.5018	16.7505	16.7572	16.6243	16.5357	16.4978
PLCXD3_Q63HM9	-0.235095	-1.10976	-0.851437	-0.027899	-1.79022	0.821181	0.215227	0.731089	1.16293	1.08398	PLCXD3	PI-PLC X domain-containing protein 3	Q63HM9	0.467596	0.000827902	0.034745	-0.467596	sp|Q63HM9|PLCX3_HUMAN PI-PLC X domain-containing protein 3 OS=Homo sapiens OX=9606 GN=PLCXD3 PE=1 SV=2		SUBCELLULAR LOCATION: Cytoplasm {ECO:0000269|PubMed:22732399}.		lipid catabolic process [GO:0016042]; signal transduction [GO:0007165]	phosphoric diester hydrolase activity [GO:0008081]	cytoplasm [GO:0005737]; synapse [GO:0045202]	GO:0005737; GO:0007165; GO:0008081; GO:0016042; GO:0045202	16.7365	16.4818	16.557	16.7968	16.2837	17.0441	16.8676	17.0179	17.1436	17.1206
ANO1_Q5XXA6	0.637532	0.841598	1.09975	0.334326	1.11711	-1.24161	-1.82585	-0.153693	-0.192661	-0.616492	ANO1	Anoctamin-1	Q5XXA6	0.443359	0.000842167	0.0351157	0.443359	sp|Q5XXA6|ANO1_HUMAN Anoctamin-1 OS=Homo sapiens OX=9606 GN=ANO1 PE=1 SV=1	FUNCTION: Calcium-activated chloride channel (CaCC) (PubMed:20056604, PubMed:22178883, PubMed:21984732, PubMed:22946059, PubMed:32487539). Plays a role in transepithelial anion transport and smooth muscle contraction. Required for the normal functioning of the interstitial cells of Cajal (ICCs) which generate electrical pacemaker activity in gastrointestinal smooth muscles. Acts as a major contri…	SUBCELLULAR LOCATION: Apical cell membrane {ECO:0000269|PubMed:15215166, ECO:0000269|PubMed:20056604, ECO:0000269|PubMed:21984732, ECO:0000269|PubMed:22178883, ECO:0000269|PubMed:22946059, ECO:0000269|PubMed:28559167, ECO:0000269|PubMed:31732694, ECO:0000269|PubMed:32487539}; Multi-pass membrane protein {ECO:0000250|UniProtKB:Q8BHY3}. Presynapse {ECO:0000250|UniProtKB:Q8BHY3}. Note=In differentia…	DISEASE: Note=Defects in ANO1 may be the cause of a disorder characterized by impaired intestinal peristalsis, intestinal pneumatosis, microalbuminuria and dysmorphic features in neonates. The defective ANO1 protein is truncated, accumulates intracellularly and is non-functional, resulting in the absence of Ca(2+)-activated chloride currents and secondary CFTR dysfunction. {ECO:0000269|PubMed:324…	cation transport [GO:0006812]; cellular response to heat [GO:0034605]; cellular response to peptide [GO:1901653]; chloride transmembrane transport [GO:1902476]; chloride transport [GO:0006821]; detection of temperature stimulus involved in sensory perception of pain [GO:0050965]; glial cell projection elongation [GO:0106091]; iodide transport [GO:0015705]; ion transmembrane transport [GO:0034220]…	calcium activated cation channel activity [GO:0005227]; chloride channel activity [GO:0005254]; identical protein binding [GO:0042802]; intracellular calcium activated chloride channel activity [GO:0005229]; iodide transmembrane transporter activity [GO:0015111]; metal ion binding [GO:0046872]; protein homodimerization activity [GO:0042803]; signaling receptor binding [GO:0005102]; voltage-gated …	apical plasma membrane [GO:0016324]; chloride channel complex [GO:0034707]; cytoplasm [GO:0005737]; extracellular exosome [GO:0070062]; integral component of plasma membrane [GO:0005887]; membrane raft [GO:0045121]; nucleoplasm [GO:0005654]; plasma membrane [GO:0005886]	GO:0005102; GO:0005227; GO:0005229; GO:0005247; GO:0005254; GO:0005654; GO:0005737; GO:0005886; GO:0005887; GO:0006812; GO:0006821; GO:0007200; GO:0015111; GO:0015705; GO:0016324; GO:0034220; GO:0034605; GO:0034707; GO:0035774; GO:0042802; GO:0042803; GO:0045121; GO:0046872; GO:0050965; GO:0055085; GO:0070062; GO:0070254; GO:0072657; GO:0106091; GO:1901653; GO:1902476	14.9449	15.001	15.072	14.8615	15.0767	14.4281	14.2674	14.7273	14.7165	14.6
ORM2_P19652	-0.756768	-1.06847	-0.819357	-0.471854	-0.762703	0.974656	1.20002	-0.311639	0.204781	1.81133	ORM2	Alpha-1-acid glycoprotein 2	P19652	1.01826	0.000858279	0.0355325	-1.01826	sp|P19652|A1AG2_HUMAN Alpha-1-acid glycoprotein 2 OS=Homo sapiens OX=9606 GN=ORM2 PE=1 SV=2	FUNCTION: Functions as transport protein in the blood stream. Binds various hydrophobic ligands in the interior of its beta-barrel domain. Also binds synthetic drugs and influences their distribution and availability. Appears to function in modulating the activity of the immune system during the acute-phase reaction. {ECO:0000269|PubMed:21349832}.	SUBCELLULAR LOCATION: Secreted.		acute-phase response [GO:0006953]; positive regulation of interleukin-1 beta production [GO:0032731]; positive regulation of interleukin-1 production [GO:0032732]; positive regulation of tumor necrosis factor production [GO:0032760]; regulation of immune system process [GO:0002682]		azurophil granule lumen [GO:0035578]; blood microparticle [GO:0072562]; collagen-containing extracellular matrix [GO:0062023]; extracellular exosome [GO:0070062]; extracellular region [GO:0005576]; extracellular space [GO:0005615]; platelet alpha granule lumen [GO:0031093]; specific granule lumen [GO:0035580]	GO:0002682; GO:0005576; GO:0005615; GO:0006953; GO:0031093; GO:0032731; GO:0032732; GO:0032760; GO:0035578; GO:0035580; GO:0062023; GO:0070062; GO:0072562	16.9411	16.7365	16.9	17.128	16.9372	18.0773	18.2252	17.2332	17.5721	18.6263
HINT1_P49773	-0.077571	-2	-1.03951	-0.358161	-0.514846	0.924375	0.952215	0.512218	0.876406	0.761623	HINT1	Histidine triad nucleotide-binding protein 1	P49773	0.439867	0.000869516	0.0355325	-0.439867	sp|P49773|HINT1_HUMAN Adenosine 5-monophosphoramidase HINT1 OS=Homo sapiens OX=9606 GN=HINT1 PE=1 SV=2	FUNCTION: Exhibits adenosine 5'-monophosphoramidase activity, hydrolyzing purine nucleotide phosphoramidates with a single phosphate group such as adenosine 5'monophosphoramidate (AMP-NH2) to yield AMP and NH2 (PubMed:15703176, PubMed:16835243, PubMed:17337452, PubMed:17217311, PubMed:23614568, PubMed:28691797, PubMed:29787766, PubMed:31990367, PubMed:22329685). Hydrolyzes adenosine 5'monophospho…	SUBCELLULAR LOCATION: Cytoplasm {ECO:0000269|PubMed:10958787, ECO:0000269|PubMed:16014379, ECO:0000269|PubMed:19112177, ECO:0000269|PubMed:8812426}. Nucleus {ECO:0000269|PubMed:10958787, ECO:0000269|PubMed:16014379, ECO:0000269|PubMed:19112177, ECO:0000269|PubMed:9770345}. Note=Interaction with CDK7 leads to a more nuclear localization. {ECO:0000269|PubMed:10958787}.	DISEASE: Neuromyotonia and axonal neuropathy, autosomal recessive (NMAN) [MIM:137200]: An autosomal recessive neurologic disorder characterized by onset in the first or second decade of a peripheral axonal neuropathy predominantly affecting motor more than sensory nerves. The axonal neuropathy is reminiscent of Charcot-Marie-Tooth disease type 2 and distal hereditary motor neuropathy. Individuals…	intrinsic apoptotic signaling pathway by p53 class mediator [GO:0072332]; positive regulation of calcium-mediated signaling [GO:0050850]; protein desumoylation [GO:0016926]; purine ribonucleotide catabolic process [GO:0009154]; regulation of transcription, DNA-templated [GO:0006355]; signal transduction [GO:0007165]	adenosine 5'-monophosphoramidase activity [GO:0043530]; deSUMOylase activity [GO:0016929]; hydrolase activity [GO:0016787]; nucleotide binding [GO:0000166]; protein kinase C binding [GO:0005080]	cytoplasm [GO:0005737]; cytoskeleton [GO:0005856]; cytosol [GO:0005829]; extracellular exosome [GO:0070062]; histone deacetylase complex [GO:0000118]; nucleoplasm [GO:0005654]; nucleus [GO:0005634]; plasma membrane [GO:0005886]	GO:0000118; GO:0000166; GO:0005080; GO:0005634; GO:0005654; GO:0005737; GO:0005829; GO:0005856; GO:0005886; GO:0006355; GO:0007165; GO:0009154; GO:0016787; GO:0016926; GO:0016929; GO:0043530; GO:0050850; GO:0070062; GO:0072332	20.1707	19.6357	19.908	20.0941	20.0513	20.4443	20.4519	20.3318	20.4312	20.3999
WARS_P23381	-0.910503	-1.33097	-0.813498	0.308225	-1.34557	0.555308	1.3833	0.872107	0.521576	0.760038	WARS	Tryptophan--tRNA ligase, cytoplasmic;T1-TrpRS;T2-TrpRS	P23381	0.381466	0.000871497	0.0355325	-0.381466	sp|P23381|SYWC_HUMAN Tryptophan--tRNA ligase, cytoplasmic OS=Homo sapiens OX=9606 GN=WARS1 PE=1 SV=2	FUNCTION: Isoform 1, isoform 2 and T1-TrpRS have aminoacylation activity while T2-TrpRS lacks it. Isoform 2, T1-TrpRS and T2-TrpRS possess angiostatic activity whereas isoform 1 lacks it. T2-TrpRS inhibits fluid shear stress-activated responses of endothelial cells. Regulates ERK, Akt, and eNOS activation pathways that are associated with angiogenesis, cytoskeletal reorganization and shear stress…	SUBCELLULAR LOCATION: Cytoplasm.	DISEASE: Neuronopathy, distal hereditary motor, 9 (HMN9) [MIM:617721]: An autosomal dominant neurologic disorder characterized by juvenile onset of slowly progressive distal muscle weakness and atrophy affecting both the lower and upper limbs. {ECO:0000269|PubMed:28369220}. Note=The disease is caused by variants affecting the gene represented in this entry.	angiogenesis [GO:0001525]; negative regulation of cell population proliferation [GO:0008285]; negative regulation of protein kinase activity [GO:0006469]; negative regulation of protein phosphorylation [GO:0001933]; positive regulation of gene expression [GO:0010628]; positive regulation of protein-containing complex assembly [GO:0031334]; regulation of angiogenesis [GO:0045765]; regulation of pr…	ATP binding [GO:0005524]; kinase inhibitor activity [GO:0019210]; protein domain specific binding [GO:0019904]; protein homodimerization activity [GO:0042803]; protein kinase binding [GO:0019901]; tryptophan-tRNA ligase activity [GO:0004830]	cytoplasm [GO:0005737]; cytosol [GO:0005829]; extracellular exosome [GO:0070062]; nucleus [GO:0005634]; protein-containing complex [GO:0032991]	GO:0001525; GO:0001933; GO:0004830; GO:0005524; GO:0005634; GO:0005737; GO:0005829; GO:0006412; GO:0006436; GO:0006469; GO:0008285; GO:0010628; GO:0010835; GO:0019210; GO:0019901; GO:0019904; GO:0031334; GO:0032991; GO:0042803; GO:0045765; GO:0070062	19.2883	19.1903	19.3109	19.5723	19.1869	19.6299	19.8228	19.7037	19.622	19.6776
TRMU_O75648	-1.18422	-0.602427	0.0268601	-0.739409	-1.68011	1.16899	0.938147	0.985832	0.710337	0.375999	TRMU	Mitochondrial tRNA-specific 2-thiouridylase 1	O75648	0.333088	0.000874154	0.0355325	-0.333088	sp|O75648|MTU1_HUMAN Mitochondrial tRNA-specific 2-thiouridylase 1 OS=Homo sapiens OX=9606 GN=TRMU PE=1 SV=2	FUNCTION: Catalyzes the 2-thiolation of uridine at the wobble position (U34) of mitochondrial tRNA(Lys), tRNA(Glu) and tRNA(Gln). Required for the formation of 5-taurinomethyl-2-thiouridine (tm5s2U) of mitochondrial tRNA(Lys), tRNA(Glu), and tRNA(Gln) at the wobble position. ATP is required to activate the C2 atom of the wobble base. {ECO:0000269|PubMed:15509579, ECO:0000269|PubMed:15944150, ECO:…	SUBCELLULAR LOCATION: Mitochondrion {ECO:0000269|PubMed:15509579, ECO:0000269|PubMed:15944150, ECO:0000269|PubMed:16513084, ECO:0000269|PubMed:16826519}.	DISEASE: Deafness, aminoglycoside-induced (DFNI) [MIM:580000]: A form of sensorineural deafness characterized by moderate-to-profound hearing loss and mitochondrial inheritance. It is induced by exposure to aminoglycosides. {ECO:0000269|PubMed:16826519}. Note=The gene represented in this entry acts as a disease modifier. DFNI is caused by mutations in mitochondrial rRNA genes, including homoplasm…	tRNA wobble position uridine thiolation [GO:0002143]	ATP binding [GO:0005524]; tRNA binding [GO:0000049]; tRNA-5-taurinomethyluridine 2-sulfurtransferase [GO:0061708]	mitochondrion [GO:0005739]	GO:0000049; GO:0002143; GO:0005524; GO:0005739; GO:0061708	16.1351	16.251	16.3764	16.2237	16.0363	16.604	16.558	16.5675	16.5126	16.446
TJP1_Q07157	0.605307	0.940492	1.36152	0.173689	1.15148	-0.437364	-0.279462	-1.00374	-1.02414	-1.48779	TJP1	Tight junction protein ZO-1	Q07157	0.311212	0.000886488	0.0358086	0.311212	sp|Q07157|ZO1_HUMAN Tight junction protein ZO-1 OS=Homo sapiens OX=9606 GN=TJP1 PE=1 SV=3	FUNCTION: TJP1, TJP2, and TJP3 are closely related scaffolding proteins that link tight junction (TJ) transmembrane proteins such as claudins, junctional adhesion molecules, and occludin to the actin cytoskeleton (PubMed:7798316, PubMed:9792688). The tight junction acts to limit movement of substances through the paracellular space and as a boundary between the compositionally distinct apical and…	SUBCELLULAR LOCATION: Cell membrane {ECO:0000269|PubMed:7798316}; Peripheral membrane protein {ECO:0000269|PubMed:7798316}; Cytoplasmic side {ECO:0000269|PubMed:7798316}. Cell junction, tight junction {ECO:0000269|PubMed:7798316}. Cell junction {ECO:0000269|PubMed:28169360}. Cell junction, gap junction. Cell projection, podosome {ECO:0000269|PubMed:20930113}. Note=Moves from the cytoplasm to the …		actomyosin structure organization [GO:0031032]; adherens junction maintenance [GO:0034334]; cell-cell adhesion [GO:0098609]; cell-cell junction assembly [GO:0007043]; cell-cell junction organization [GO:0045216]; establishment of endothelial intestinal barrier [GO:0090557]; maintenance of blood-brain barrier [GO:0035633]; negative regulation of actin cytoskeleton reorganization [GO:2000250]; nega…	cadherin binding [GO:0045296]; calmodulin binding [GO:0005516]; cell adhesion molecule binding [GO:0050839]	adherens junction [GO:0005912]; apical junction complex [GO:0043296]; apical part of cell [GO:0045177]; basolateral plasma membrane [GO:0016323]; bicellular tight junction [GO:0005923]; cell junction [GO:0030054]; cell projection [GO:0042995]; cytoplasm [GO:0005737]; cytosol [GO:0005829]; gap junction [GO:0005921]; plasma membrane [GO:0005886]; podosome [GO:0002102]; protein-containing complex [G…	GO:0002102; GO:0005516; GO:0005737; GO:0005829; GO:0005886; GO:0005912; GO:0005921; GO:0005923; GO:0007043; GO:0008284; GO:0016323; GO:0030054; GO:0030335; GO:0031032; GO:0032991; GO:0034334; GO:0035633; GO:0042995; GO:0043066; GO:0043296; GO:0045177; GO:0045216; GO:0045296; GO:0050839; GO:0051493; GO:0051497; GO:0070160; GO:0071896; GO:0090557; GO:0098609; GO:0150105; GO:1901888; GO:1902396; GO:…	20.2809	20.3425	20.4199	20.2015	20.3813	20.0892	20.1182	19.9851	19.9814	19.8961
TRPV2_Q9Y5S1	0.813511	1.53543	0.904045	0.342767	0.496574	-1.5412	-0.814125	-0.424438	-1.25614	-0.0564256	TRPV2	Transient receptor potential cation channel subfamily V member 2	Q9Y5S1	0.375272	0.000908628	0.0362868	0.375272	sp|Q9Y5S1|TRPV2_HUMAN Transient receptor potential cation channel subfamily V member 2 OS=Homo sapiens OX=9606 GN=TRPV2 PE=1 SV=1	FUNCTION: Calcium-permeable, non-selective cation channel with an outward rectification. Seems to be regulated, at least in part, by IGF-I, PDGF and neuropeptide head activator. May transduce physical stimuli in mast cells. Activated by temperatures higher than 52 degrees Celsius; is not activated by vanilloids and acidic pH. {ECO:0000269|PubMed:10201375}.	SUBCELLULAR LOCATION: Cell membrane {ECO:0000250}; Multi-pass membrane protein {ECO:0000250}. Cytoplasm {ECO:0000250}. Melanosome {ECO:0000269|PubMed:17081065}. Note=Translocates from the cytoplasm to the plasma membrane upon ligand stimulation (By similarity). Identified by mass spectrometry in melanosome fractions from stage I to stage IV. {ECO:0000250}.		calcium ion import across plasma membrane [GO:0098703]; calcium ion transmembrane transport [GO:0070588]; positive regulation of axon extension [GO:0045773]; positive regulation of calcium ion import [GO:0090280]; positive regulation of cold-induced thermogenesis [GO:0120162]; response to heat [GO:0009408]; response to temperature stimulus [GO:0009266]; sensory perception [GO:0007600]	calcium channel activity [GO:0005262]; cation channel activity [GO:0005261]; ion channel activity [GO:0005216]; ion transmembrane transporter activity [GO:0015075]	axonal growth cone [GO:0044295]; cell body [GO:0044297]; cell surface [GO:0009986]; growth cone membrane [GO:0032584]; integral component of plasma membrane [GO:0005887]; melanosome [GO:0042470]; plasma membrane [GO:0005886]	GO:0005216; GO:0005261; GO:0005262; GO:0005886; GO:0005887; GO:0007600; GO:0009266; GO:0009408; GO:0009986; GO:0015075; GO:0032584; GO:0042470; GO:0044295; GO:0044297; GO:0045773; GO:0070588; GO:0090280; GO:0098703; GO:0120162	14.3012	14.4667	14.322	14.1933	14.2286	13.7614	13.9281	14.0174	13.8267	14.1018
MUL1_Q969V5	1.55013	1.1103	0.372582	0.118825	0.878973	-1.05309	-1.24126	-0.134698	-0.306872	-1.2949	MUL1	Mitochondrial ubiquitin ligase activator of NFKB 1	Q969V5	0.425616	0.000909555	0.0362868	0.425616	sp|Q969V5|MUL1_HUMAN Mitochondrial ubiquitin ligase activator of NFKB 1 OS=Homo sapiens OX=9606 GN=MUL1 PE=1 SV=1	FUNCTION: Exhibits weak E3 ubiquitin-protein ligase activity (PubMed:18591963, PubMed:19407830, PubMed:22410793). E3 ubiquitin ligases accept ubiquitin from an E2 ubiquitin-conjugating enzyme in the form of a thioester and then directly transfer the ubiquitin to targeted substrates (PubMed:18591963, PubMed:19407830, PubMed:22410793). Can ubiquitinate AKT1 preferentially at 'Lys-284' involving 'Ly…	SUBCELLULAR LOCATION: Mitochondrion outer membrane {ECO:0000269|PubMed:18207745, ECO:0000269|PubMed:18213395, ECO:0000269|PubMed:18591963, ECO:0000269|PubMed:21597459}; Multi-pass membrane protein {ECO:0000255}. Peroxisome {ECO:0000269|PubMed:18207745}. Note=Transported in mitochondrion-derived vesicles from the mitochondrion to the peroxisome. {ECO:0000269|PubMed:18207745}.		activation of cysteine-type endopeptidase activity involved in apoptotic process [GO:0006919]; apoptotic process [GO:0006915]; cellular response to exogenous dsRNA [GO:0071360]; mitochondrial fission [GO:0000266]; mitochondrion localization [GO:0051646]; negative regulation of cell growth [GO:0030308]; negative regulation of chemokine (C-C motif) ligand 5 production [GO:0071650]; negative regulat…	identical protein binding [GO:0042802]; metal ion binding [GO:0046872]; p53 binding [GO:0002039]; SUMO transferase activity [GO:0019789]; ubiquitin protein ligase activity [GO:0061630]; ubiquitin protein ligase binding [GO:0031625]; ubiquitin-protein transferase activity [GO:0004842]	axon [GO:0030424]; integral component of mitochondrial outer membrane [GO:0031307]; membrane [GO:0016020]; mitochondrion [GO:0005739]; neuronal cell body [GO:0043025]; peroxisome [GO:0005777]	GO:0000209; GO:0000266; GO:0002039; GO:0004842; GO:0005739; GO:0005777; GO:0006915; GO:0006919; GO:0010637; GO:0010821; GO:0016020; GO:0016567; GO:0019789; GO:0030308; GO:0030424; GO:0031307; GO:0031625; GO:0031648; GO:0033235; GO:0042802; GO:0043025; GO:0043123; GO:0045824; GO:0046872; GO:0050689; GO:0050821; GO:0051646; GO:0051881; GO:0051898; GO:0060339; GO:0061630; GO:0071360; GO:0071650; GO:…	17.3075	17.1914	16.9967	16.9297	17.1304	16.6203	16.5707	16.8628	16.8173	16.5565
SLC25A35_Q3KQZ1	1.04848	0.556225	1.53832	-0.0939248	0.888721	-1.33725	-1.23431	-0.976993	0.0105317	-0.399789	SLC25A35	Solute carrier family 25 member 35	Q3KQZ1	0.561889	0.000940807	0.0373033	0.561889	sp|Q3KQZ1|S2535_HUMAN Solute carrier family 25 member 35 OS=Homo sapiens OX=9606 GN=SLC25A35 PE=1 SV=1		SUBCELLULAR LOCATION: Mitochondrion inner membrane {ECO:0000250}; Multi-pass membrane protein {ECO:0000250}.				integral component of membrane [GO:0016021]; mitochondrial inner membrane [GO:0005743]	GO:0005743; GO:0016021	15.4397	15.2641	15.6144	15.0321	15.3827	14.5886	14.6253	14.7171	15.0694	14.923
MOG_Q16653	1.08987	0.579081	0.632669	1.41277	0.205921	-1.3199	-1.35004	0.345254	-0.596209	-0.999422	MOG	Myelin-oligodendrocyte glycoprotein	Q16653	0.601876	0.000956302	0.0376778	0.601876	sp|Q16653|MOG_HUMAN Myelin-oligodendrocyte glycoprotein OS=Homo sapiens OX=9606 GN=MOG PE=1 SV=2	FUNCTION: Mediates homophilic cell-cell adhesion (By similarity). Minor component of the myelin sheath. May be involved in completion and/or maintenance of the myelin sheath and in cell-cell communication. {ECO:0000250}.; FUNCTION: (Microbial infection) Acts as a receptor for rubella virus. {ECO:0000269|PubMed:21880773}.	SUBCELLULAR LOCATION: [Isoform 1]: Cell membrane {ECO:0000305}; Multi-pass membrane protein {ECO:0000305}.; SUBCELLULAR LOCATION: [Isoform 5]: Cell membrane {ECO:0000305}; Multi-pass membrane protein {ECO:0000305}.; SUBCELLULAR LOCATION: [Isoform 2]: Cell membrane {ECO:0000305}; Single-pass type I membrane protein {ECO:0000305}.; SUBCELLULAR LOCATION: [Isoform 3]: Cell membrane {ECO:0000305}; Sin…	DISEASE: Narcolepsy 7 (NRCLP7) [MIM:614250]: Neurological disabling sleep disorder, characterized by excessive daytime sleepiness, sleep fragmentation, symptoms of abnormal rapid-eye-movement (REM) sleep, cataplexy, hypnagogic hallucinations, and sleep paralysis. Cataplexy is a sudden loss of muscle tone triggered by emotions, which is the most valuable clinical feature used to diagnose narcoleps…	cell adhesion [GO:0007155]; central nervous system development [GO:0007417]; regulation of cytokine production [GO:0001817]; T cell receptor signaling pathway [GO:0050852]	signaling receptor binding [GO:0005102]; virus receptor activity [GO:0001618]	external side of plasma membrane [GO:0009897]; integral component of membrane [GO:0016021]; plasma membrane [GO:0005886]	GO:0001618; GO:0001817; GO:0005102; GO:0005886; GO:0007155; GO:0007417; GO:0009897; GO:0016021; GO:0050852	11.7216	11.5256	11.5461	11.8455	11.3823	10.7967	10.7851	11.4358	11.0745	10.9197
TPCN1_Q9ULQ1	1.57557	0.815133	0.711034	0.0130905	0.920459	-1.3738	-1.03554	-0.172791	-0.249725	-1.20343	TPCN1	Two pore calcium channel protein 1	Q9ULQ1	0.40994	0.000961913	0.0376778	0.40994	sp|Q9ULQ1|TPC1_HUMAN Two pore channel protein 1 OS=Homo sapiens OX=9606 GN=TPCN1 PE=1 SV=3	FUNCTION: Intracellular channel initially characterized as a non-selective Ca(2+)-permeable channel activated by NAADP (nicotinic acid adenine dinucleotide phosphate), it is also a voltage-gated highly-selective Na(+) channel activated directly by PI(3,5)P2 (phosphatidylinositol 3,5-bisphosphate) that senses pH changes and confers electrical excitability to organelles (PubMed:19620632, PubMed:230…	SUBCELLULAR LOCATION: Lysosome membrane {ECO:0000269|PubMed:19620632, ECO:0000269|PubMed:23063126, ECO:0000269|PubMed:25722412}; Multi-pass membrane protein {ECO:0000269|PubMed:19620632}. Endosome membrane {ECO:0000269|PubMed:19620632, ECO:0000269|PubMed:20880839, ECO:0000269|PubMed:23063126, ECO:0000269|PubMed:25722412}; Multi-pass membrane protein {ECO:0000269|PubMed:19620632}. Early endosome m…		endocytosis involved in viral entry into host cell [GO:0075509]; ion transmembrane transport [GO:0034220]; positive regulation of autophagy [GO:0010508]; regulation of ion transmembrane transport [GO:0034765]	identical protein binding [GO:0042802]; intracellular phosphatidylinositol-3,5-bisphosphate-sensitive cation channel activity [GO:0097682]; ligand-gated sodium channel activity [GO:0015280]; NAADP-sensitive calcium-release channel activity [GO:0072345]; phosphatidylinositol-3,5-bisphosphate binding [GO:0080025]; protein homodimerization activity [GO:0042803]; syntaxin binding [GO:0019905]; voltag…	early endosome membrane [GO:0031901]; endolysosome [GO:0036019]; endosome [GO:0005768]; endosome membrane [GO:0010008]; integral component of membrane [GO:0016021]; lysosomal membrane [GO:0005765]; lysosome [GO:0005764]; recycling endosome membrane [GO:0055038]	GO:0005244; GO:0005248; GO:0005764; GO:0005765; GO:0005768; GO:0010008; GO:0010508; GO:0015280; GO:0016021; GO:0019905; GO:0031901; GO:0034220; GO:0034765; GO:0036019; GO:0042802; GO:0042803; GO:0055038; GO:0072345; GO:0075509; GO:0080025; GO:0097682	17.8187	17.6256	17.5992	17.4219	17.6524	17.0697	17.1556	17.3747	17.3552	17.113
CTTN_Q14247	0.811076	1.19399	0.711496	-0.380354	1.70919	-0.681735	-0.748346	-0.921783	-0.712924	-0.98061	CTTN	Src substrate cortactin	Q14247	0.39912	0.000972571	0.0377563	0.39912	sp|Q14247|SRC8_HUMAN Src substrate cortactin OS=Homo sapiens OX=9606 GN=CTTN PE=1 SV=2	FUNCTION: Contributes to the organization of the actin cytoskeleton and cell shape (PubMed:21296879). Plays a role in the formation of lamellipodia and in cell migration. Plays a role in the regulation of neuron morphology, axon growth and formation of neuronal growth cones (By similarity). Through its interaction with CTTNBP2, involved in the regulation of neuronal spine density (By similarity).…	SUBCELLULAR LOCATION: Cytoplasm, cytoskeleton {ECO:0000269|PubMed:12151401}. Cell projection, lamellipodium {ECO:0000269|PubMed:12151401}. Cell projection, ruffle. Cell projection, dendrite {ECO:0000250}. Cell projection {ECO:0000250|UniProtKB:Q66HL2}. Cell membrane {ECO:0000305|PubMed:17959782}; Peripheral membrane protein {ECO:0000305}; Cytoplasmic side {ECO:0000305}. Cell projection, podosome …		actin cytoskeleton reorganization [GO:0031532]; actin filament polymerization [GO:0030041]; cell motility [GO:0048870]; dendritic spine maintenance [GO:0097062]; extrinsic apoptotic signaling pathway [GO:0097191]; focal adhesion assembly [GO:0048041]; intracellular protein transport [GO:0006886]; lamellipodium organization [GO:0097581]; negative regulation of extrinsic apoptotic signaling pathway…	actin filament binding [GO:0051015]; cadherin binding [GO:0045296]; profilin binding [GO:0005522]	cell cortex [GO:0005938]; clathrin-coated pit [GO:0005905]; cortical actin cytoskeleton [GO:0030864]; cortical cytoskeleton [GO:0030863]; cytoplasm [GO:0005737]; cytoskeleton [GO:0005856]; cytosol [GO:0005829]; dendritic spine [GO:0043197]; focal adhesion [GO:0005925]; Golgi apparatus [GO:0005794]; intracellular membrane-bounded organelle [GO:0043231]; lamellipodium [GO:0030027]; mitotic spindle …	GO:0001726; GO:0002102; GO:0005522; GO:0005737; GO:0005794; GO:0005829; GO:0005856; GO:0005886; GO:0005905; GO:0005925; GO:0005938; GO:0006886; GO:0006898; GO:0006930; GO:0008076; GO:0030027; GO:0030041; GO:0030427; GO:0030516; GO:0030833; GO:0030838; GO:0030863; GO:0030864; GO:0031532; GO:0043197; GO:0043231; GO:0045296; GO:0045987; GO:0048041; GO:0048812; GO:0048870; GO:0051015; GO:0097062; GO:…	19.7602	19.8546	19.7356	19.4663	19.9817	19.392	19.3756	19.3328	19.3843	19.3183
COL16A1_Q07092	1.2305	1.7493	0.117036	-0.384099	1.12453	-0.890608	-0.615541	-0.67489	-0.806593	-0.849635	COL16A1	Collagen alpha-1(XVI) chain	Q07092	1.55379	0.0009756	0.0377563	1.55379	sp|Q07092|COGA1_HUMAN Collagen alpha-1(XVI) chain OS=Homo sapiens OX=9606 GN=COL16A1 PE=1 SV=2	FUNCTION: Involved in mediating cell attachment and inducing integrin-mediated cellular reactions, such as cell spreading and alterations in cell morphology. {ECO:0000269|PubMed:16754661}.	SUBCELLULAR LOCATION: Secreted, extracellular space, extracellular matrix {ECO:0000269|PubMed:9022684}.		cell adhesion [GO:0007155]; cell adhesion mediated by integrin [GO:0033627]; cellular response to amino acid stimulus [GO:0071230]; extracellular matrix organization [GO:0030198]; female pregnancy [GO:0007565]; integrin activation [GO:0033622]; integrin-mediated signaling pathway [GO:0007229]; positive regulation of focal adhesion assembly [GO:0051894]	extracellular matrix structural constituent [GO:0005201]; extracellular matrix structural constituent conferring tensile strength [GO:0030020]; integrin binding [GO:0005178]	collagen type V trimer [GO:0005588]; collagen type XVI trimer [GO:0005597]; collagen-containing extracellular matrix [GO:0062023]; endoplasmic reticulum lumen [GO:0005788]; extracellular matrix [GO:0031012]; extracellular region [GO:0005576]; extracellular space [GO:0005615]	GO:0005178; GO:0005201; GO:0005576; GO:0005588; GO:0005597; GO:0005615; GO:0005788; GO:0007155; GO:0007229; GO:0007565; GO:0030020; GO:0030198; GO:0031012; GO:0033622; GO:0033627; GO:0051894; GO:0062023; GO:0071230	15.8723	16.3975	14.7451	14.2378	15.765	13.7251	14.0035	13.9435	13.8101	13.7666
FCGBP_Q9Y6R7	-1.10446	-0.515181	-1.53854	-0.266012	-0.401842	1.95093	0.466022	0.679113	0.0782096	0.651757	FCGBP	IgGFc-binding protein	Q9Y6R7	2.3881	0.000993971	0.0379824	-2.3881	sp|Q9Y6R7|FCGBP_HUMAN IgGFc-binding protein OS=Homo sapiens OX=9606 GN=FCGBP PE=1 SV=3	FUNCTION: May be involved in the maintenance of the mucosal structure as a gel-like component of the mucosa. {ECO:0000269|PubMed:9182547}.	SUBCELLULAR LOCATION: Secreted {ECO:0000305}.				extracellular exosome [GO:0070062]; extracellular matrix [GO:0031012]; extracellular space [GO:0005615]	GO:0005615; GO:0031012; GO:0070062	10.5521	11.4717	9.87479	11.8605	11.6485	15.3199	13.0028	13.3353	12.3976	13.2926
DERL1_Q9BUN8	-1.34089	-0.755847	-0.912838	0.119345	-1.29046	0.835995	0.790336	1.27231	1.06161	0.220431	DERL1	Derlin-1	Q9BUN8	0.320038	0.000994171	0.0379824	-0.320038	sp|Q9BUN8|DERL1_HUMAN Derlin-1 OS=Homo sapiens OX=9606 GN=DERL1 PE=1 SV=1	FUNCTION: Functional component of endoplasmic reticulum-associated degradation (ERAD) for misfolded lumenal proteins (PubMed:15215856, PubMed:33658201). Forms homotetramers which encircle a large channel traversing the endoplasmic reticulum (ER) membrane (PubMed:33658201). This allows the retrotranslocation of misfolded proteins from the ER into the cytosol where they are ubiquitinated and degrad…	SUBCELLULAR LOCATION: Endoplasmic reticulum membrane {ECO:0000269|PubMed:15215855, ECO:0000269|PubMed:15215856, ECO:0000269|PubMed:16186509, ECO:0000269|PubMed:16449189}; Multi-pass membrane protein {ECO:0000269|PubMed:15215855, ECO:0000269|PubMed:15215856, ECO:0000269|PubMed:16186509, ECO:0000269|PubMed:16449189}.		endoplasmic reticulum unfolded protein response [GO:0030968]; ER-associated misfolded protein catabolic process [GO:0071712]; ERAD pathway [GO:0036503]; establishment of protein localization [GO:0045184]; positive regulation of protein binding [GO:0032092]; positive regulation of protein ubiquitination [GO:0031398]; protein destabilization [GO:0031648]; response to unfolded protein [GO:0006986]; …	ATPase binding [GO:0051117]; identical protein binding [GO:0042802]; MHC class I protein binding [GO:0042288]; misfolded protein binding [GO:0051787]; protease binding [GO:0002020]; protein-containing complex binding [GO:0044877]; signal recognition particle binding [GO:0005047]; signaling receptor activity [GO:0038023]; ubiquitin protein ligase binding [GO:0031625]; ubiquitin-specific protease b…	Derlin-1 retrotranslocation complex [GO:0036513]; Derlin-1-VIMP complex [GO:0036502]; early endosome [GO:0005769]; endoplasmic reticulum [GO:0005783]; endoplasmic reticulum membrane [GO:0005789]; endoplasmic reticulum quality control compartment [GO:0044322]; Hrd1p ubiquitin ligase ERAD-L complex [GO:0000839]; integral component of endoplasmic reticulum membrane [GO:0030176]; integral component o…	GO:0000839; GO:0002020; GO:0005047; GO:0005769; GO:0005770; GO:0005783; GO:0005789; GO:0006986; GO:0016020; GO:0016021; GO:0030176; GO:0030433; GO:0030968; GO:0030970; GO:0031398; GO:0031625; GO:0031648; GO:0032092; GO:0036502; GO:0036503; GO:0036513; GO:0038023; GO:0042288; GO:0042802; GO:0044322; GO:0044877; GO:0045184; GO:0051117; GO:0051787; GO:0071712; GO:1990381	13.66	13.772	13.7419	13.9395	13.6696	14.0766	14.0679	14.1601	14.1198	13.9588
ROR1_Q01973	0.749983	1.2664	0.961521	0.00531785	1.0615	-1.09923	0.25207	-0.815805	-1.25671	-1.12504	ROR1	Tyrosine-protein kinase transmembrane receptor ROR1	Q01973	0.39468	0.00100026	0.0379824	0.39468	sp|Q01973|ROR1_HUMAN Inactive tyrosine-protein kinase transmembrane receptor ROR1 OS=Homo sapiens OX=9606 GN=ROR1 PE=1 SV=2	FUNCTION: Has very low kinase activity in vitro and is unlikely to function as a tyrosine kinase in vivo (PubMed:25029443). Receptor for ligand WNT5A which activate downstream NFkB signaling pathway and may result in the inhibition of WNT3A-mediated signaling (PubMed:25029443, PubMed:27162350). In inner ear, crucial for spiral ganglion neurons to innervate auditory hair cells (PubMed:27162350). {…	SUBCELLULAR LOCATION: Membrane {ECO:0000269|PubMed:27162350}; Single-pass type I membrane protein. Cell projection, axon {ECO:0000250|UniProtKB:Q9Z139}.	DISEASE: Deafness, autosomal recessive, 108 (DFNB108) [MIM:617654]: A form of non-syndromic sensorineural hearing loss. Sensorineural deafness results from damage to the neural receptors of the inner ear, the nerve pathways to the brain, or the area of the brain that receives sound information. {ECO:0000269|PubMed:27162350}. Note=The disease is caused by variants affecting the gene represented in…	astrocyte development [GO:0014002]; inner ear development [GO:0048839]; positive regulation of I-kappaB kinase/NF-kappaB signaling [GO:0043123]; positive regulation of kinase activity [GO:0033674]; positive regulation of neuron projection development [GO:0010976]; positive regulation of NF-kappaB transcription factor activity [GO:0051092]; positive regulation of phosphatidylinositol 3-kinase sign…	ATP binding [GO:0005524]; coreceptor activity involved in Wnt signaling pathway, planar cell polarity pathway [GO:1904929]; transmembrane receptor protein tyrosine kinase activity [GO:0004714]; Wnt receptor activity [GO:0042813]; Wnt-protein binding [GO:0017147]	axon terminus [GO:0043679]; cell surface [GO:0009986]; cytoplasm [GO:0005737]; integral component of plasma membrane [GO:0005887]; plasma membrane [GO:0005886]; receptor complex [GO:0043235]; stress fiber [GO:0001725]	GO:0001725; GO:0004714; GO:0005524; GO:0005737; GO:0005886; GO:0005887; GO:0007169; GO:0007605; GO:0009986; GO:0010976; GO:0014002; GO:0014068; GO:0017147; GO:0033674; GO:0042813; GO:0043123; GO:0043235; GO:0043679; GO:0048839; GO:0051092; GO:1904929	15.312	15.438	15.3636	15.1303	15.388	14.8609	15.1905	14.93	14.8225	14.8546
C1orf198_Q9H425	0.200933	1.5661	0.502792	-0.091023	1.73939	-0.616725	-0.636253	-1.0261	-0.679949	-0.959172	C1orf198	Uncharacterized protein C1orf198	Q9H425	0.57789	0.00100724	0.0379824	0.57789	sp|Q9H425|CA198_HUMAN Uncharacterized protein C1orf198 OS=Homo sapiens OX=9606 GN=C1orf198 PE=1 SV=1		SUBCELLULAR LOCATION: Cytoplasm {ECO:0000269|PubMed:22361696}.				cytosol [GO:0005829]	GO:0005829	17.0185	17.5218	17.1298	16.9108	17.5857	16.717	16.7098	16.566	16.6937	16.5907
TRIAP1_O43715	-1.81439	-0.994199	-0.94972	0.347479	-0.500278	0.648337	0.341016	1.18112	0.870295	0.870334	TRIAP1	TP53-regulated inhibitor of apoptosis 1	O43715	0.592465	0.00101758	0.0379824	-0.592465	sp|O43715|TRIA1_HUMAN TP53-regulated inhibitor of apoptosis 1 OS=Homo sapiens OX=9606 GN=TRIAP1 PE=1 SV=1	FUNCTION: Involved in the modulation of the mitochondrial apoptotic pathway by ensuring the accumulation of cardiolipin (CL) in mitochondrial membranes. In vitro, the TRIAP1:PRELID1 complex mediates the transfer of phosphatidic acid (PA) between liposomes and probably functions as a PA transporter across the mitochondrion intermembrane space to provide PA for CL synthesis in the inner membrane (P…	SUBCELLULAR LOCATION: Mitochondrion {ECO:0000269|PubMed:15735003, ECO:0000269|PubMed:23931759}. Mitochondrion intermembrane space {ECO:0000269|PubMed:23931759}.		apoptotic process [GO:0006915]; cellular response to UV [GO:0034644]; DNA damage response, signal transduction by p53 class mediator [GO:0030330]; DNA damage response, signal transduction by p53 class mediator resulting in cell cycle arrest [GO:0006977]; intermembrane lipid transfer [GO:0120009]; negative regulation of apoptotic process [GO:0043066]; negative regulation of cysteine-type endopepti…	p53 binding [GO:0002039]	mitochondrial intermembrane space [GO:0005758]; mitochondrion [GO:0005739]; nucleoplasm [GO:0005654]; nucleus [GO:0005634]; protein-containing complex [GO:0032991]	GO:0002039; GO:0005634; GO:0005654; GO:0005739; GO:0005758; GO:0006915; GO:0006977; GO:0015914; GO:0030330; GO:0032991; GO:0034644; GO:0043066; GO:0043154; GO:0045332; GO:0045944; GO:0090201; GO:0097035; GO:0120009; GO:1902166; GO:2001140	16.3677	16.6783	16.6952	17.1865	16.8654	17.3004	17.184	17.5022	17.3844	17.3845
FASN_P49327	-0.631256	-0.357433	-0.547742	-1.28419	-1.22889	1.46849	1.51266	0.154024	0.710225	0.204117	FASN	Fatty acid synthase;[Acyl-carrier-protein] S-acetyltransferase;[Acyl-carrier-protein] S-malonyltransferase;3-oxoacyl-[acyl-carrier-protein] synthase;3-oxoacyl-[acyl-carrier-protein] reductase;3-hydroxyacyl-[acyl-carrier-protein] dehydratase;Enoyl-[acyl-carrier-protein] reductase;Oleoyl-[acyl-carrier-protein] hydrolase	P49327	0.387971	0.00101766	0.0379824	-0.387971	sp|P49327|FAS_HUMAN Fatty acid synthase OS=Homo sapiens OX=9606 GN=FASN PE=1 SV=3	FUNCTION: Fatty acid synthetase is a multifunctional enzyme that catalyzes the de novo biosynthesis of long-chain saturated fatty acids starting from acetyl-CoA and malonyl-CoA in the presence of NADPH. This multifunctional protein contains 7 catalytic activities and a site for the binding of the prosthetic group 4'-phosphopantetheine of the acyl carrier protein ([ACP]) domain. {ECO:0000269|PubMe…	SUBCELLULAR LOCATION: Cytoplasm {ECO:0000269|PubMed:17081065}. Melanosome {ECO:0000269|PubMed:17081065}. Note=Identified by mass spectrometry in melanosome fractions from stage I to stage IV.		cellular response to interleukin-4 [GO:0071353]; establishment of endothelial intestinal barrier [GO:0090557]; ether lipid biosynthetic process [GO:0008611]; fatty acid biosynthetic process [GO:0006633]; fatty acid metabolic process [GO:0006631]; glandular epithelial cell development [GO:0002068]; inflammatory response [GO:0006954]; mammary gland development [GO:0030879]; monocyte differentiation…	(3R)-hydroxymyristoyl-[acyl-carrier-protein] dehydratase activity [GO:0008659]; 3-hydroxydecanoyl-[acyl-carrier-protein] dehydratase activity [GO:0008693]; 3-hydroxyoctanoyl-[acyl-carrier-protein] dehydratase activity [GO:0047451]; 3-hydroxypalmitoyl-[acyl-carrier-protein] dehydratase activity [GO:0004317]; 3-oxoacyl-[acyl-carrier-protein] reductase (NADPH) activity [GO:0004316]; 3-oxoacyl-[acyl-…	cytoplasm [GO:0005737]; cytosol [GO:0005829]; extracellular exosome [GO:0070062]; glycogen granule [GO:0042587]; Golgi apparatus [GO:0005794]; melanosome [GO:0042470]; membrane [GO:0016020]; plasma membrane [GO:0005886]	GO:0001649; GO:0002068; GO:0003723; GO:0004312; GO:0004313; GO:0004314; GO:0004315; GO:0004316; GO:0004317; GO:0004320; GO:0005737; GO:0005794; GO:0005829; GO:0005886; GO:0006631; GO:0006633; GO:0006954; GO:0008611; GO:0008659; GO:0008693; GO:0016020; GO:0016295; GO:0016296; GO:0030223; GO:0030224; GO:0030879; GO:0031177; GO:0042470; GO:0042587; GO:0045296; GO:0047117; GO:0047451; GO:0070062; GO:…	18.6313	18.6969	18.6513	18.4749	18.4882	19.1342	19.1448	18.8194	18.9526	18.8314
SGCE_O43556	1.25394	1.40005	0.565701	-0.608291	1.26401	-0.609003	-1.1392	-0.671507	-0.710546	-0.745161	SGCE	Epsilon-sarcoglycan	O43556	0.731268	0.00102929	0.0379824	0.731268	sp|O43556|SGCE_HUMAN Epsilon-sarcoglycan OS=Homo sapiens OX=9606 GN=SGCE PE=1 SV=6	FUNCTION: Component of the sarcoglycan complex, a subcomplex of the dystrophin-glycoprotein complex which forms a link between the F-actin cytoskeleton and the extracellular matrix.	SUBCELLULAR LOCATION: Cell membrane, sarcolemma {ECO:0000250}; Single-pass membrane protein {ECO:0000250}. Cytoplasm, cytoskeleton {ECO:0000250}. Cell projection, dendrite {ECO:0000250}. Golgi apparatus {ECO:0000250}.	DISEASE: Dystonia 11, myoclonic (DYT11) [MIM:159900]: A myoclonic dystonia. Dystonia is defined by the presence of sustained involuntary muscle contractions, often leading to abnormal postures. DYT11 is characterized by involuntary lightning jerks and dystonic movements and postures alleviated by alcohol. Inheritance is autosomal dominant. The age of onset, pattern of body involvement, presence o…	cell-matrix adhesion [GO:0007160]; muscle organ development [GO:0007517]		cytoskeleton [GO:0005856]; dendrite membrane [GO:0032590]; dystrophin-associated glycoprotein complex [GO:0016010]; Golgi apparatus [GO:0005794]; integral component of plasma membrane [GO:0005887]; plasma membrane [GO:0005886]; sarcoglycan complex [GO:0016012]; sarcolemma [GO:0042383]	GO:0005794; GO:0005856; GO:0005886; GO:0005887; GO:0007160; GO:0007517; GO:0016010; GO:0016012; GO:0032590; GO:0042383	17.4995	17.5684	17.1749	16.621	17.5043	16.6207	16.3706	16.5912	16.5728	16.5565
BTD_P43251	-0.662161	-0.735455	-1.3944	0.156828	-1.28099	1.04338	0.85489	0.909678	1.3123	-0.204076	BTD	Biotinidase	P43251	0.570589	0.00103118	0.0379824	-0.570589	sp|P43251|BTD_HUMAN Biotinidase OS=Homo sapiens OX=9606 GN=BTD PE=1 SV=2	FUNCTION: Catalytic release of biotin from biocytin, the product of biotin-dependent carboxylases degradation. {ECO:0000305|PubMed:9099842, ECO:0000305|PubMed:9654207}.	SUBCELLULAR LOCATION: Secreted, extracellular space {ECO:0000305|PubMed:9099842, ECO:0000305|PubMed:9654207}.	DISEASE: Biotinidase deficiency (BTD deficiency) [MIM:253260]: A juvenile form of multiple carboxylase deficiency, an autosomal recessive disorder of biotin metabolism, characterized by ketoacidosis, hyperammonemia, excretion of abnormal organic acid metabolites, and dermatitis. Biotinidase deficiency is characterized by seizures, hypotonia, skin rash, alopecia, ataxia, hearing loss, and optic at…	biotin metabolic process [GO:0006768]; central nervous system development [GO:0007417]	biotinidase activity [GO:0047708]	extracellular exosome [GO:0070062]; extracellular region [GO:0005576]; extracellular space [GO:0005615]; mitochondrial matrix [GO:0005759]	GO:0005576; GO:0005615; GO:0005759; GO:0006768; GO:0007417; GO:0047708; GO:0070062	14.9768	14.9501	14.7101	15.2751	14.7514	15.5981	15.5294	15.5494	15.696	15.1437
PDE5A_O76074	0.402189	1.42524	1.23677	-0.459612	1.31854	-0.589663	-0.698235	-0.557173	-0.932382	-1.14567	PDE5A	cGMP-specific 3,5-cyclic phosphodiesterase	O76074	0.551449	0.00103433	0.0379824	0.551449	sp|O76074|PDE5A_HUMAN cGMP-specific 3,5-cyclic phosphodiesterase OS=Homo sapiens OX=9606 GN=PDE5A PE=1 SV=2	FUNCTION: Plays a role in signal transduction by regulating the intracellular concentration of cyclic nucleotides. This phosphodiesterase catalyzes the specific hydrolysis of cGMP to 5'-GMP (PubMed:9714779, PubMed:15489334). Specifically regulates nitric-oxide-generated cGMP (PubMed:15489334). {ECO:0000269|PubMed:15489334, ECO:0000269|PubMed:9714779}.			cGMP catabolic process [GO:0046069]; negative regulation of cardiac muscle contraction [GO:0055118]; negative regulation of T cell proliferation [GO:0042130]; oocyte development [GO:0048599]; positive regulation of cardiac muscle hypertrophy [GO:0010613]; positive regulation of MAP kinase activity [GO:0043406]; positive regulation of oocyte development [GO:0060282]; regulation of nitric oxide med…	3',5'-cyclic-GMP phosphodiesterase activity [GO:0047555]; 3',5'-cyclic-nucleotide phosphodiesterase activity [GO:0004114]; cGMP binding [GO:0030553]; metal ion binding [GO:0046872]	cytosol [GO:0005829]	GO:0004114; GO:0005829; GO:0007165; GO:0010613; GO:0010749; GO:0030553; GO:0042098; GO:0042130; GO:0043406; GO:0046069; GO:0046872; GO:0047555; GO:0048599; GO:0055118; GO:0055119; GO:0060282	16.1595	16.519	16.4528	15.8566	16.4815	15.8109	15.7728	15.8223	15.6905	15.6155
TUBB8_Q3ZCM7	1.53704	0.901899	0.954692	-0.222314	0.689763	0.106705	-0.480206	-1.02679	-1.05233	-1.40846	TUBB8	Tubulin beta-8 chain	Q3ZCM7	0.804256	0.00104789	0.0380953	0.804256	sp|Q3ZCM7|TBB8_HUMAN Tubulin beta-8 chain OS=Homo sapiens OX=9606 GN=TUBB8 PE=1 SV=2	FUNCTION: Tubulin is the major constituent of microtubules. It binds two moles of GTP, one at an exchangeable site on the beta chain and one at a non-exchangeable site on the alpha chain (By similarity). TUBB8 has a key role in meiotic spindle assembly and oocyte maturation (PubMed:26789871). {ECO:0000250, ECO:0000269|PubMed:26789871}.	SUBCELLULAR LOCATION: Cytoplasm, cytoskeleton {ECO:0000269|PubMed:26789871}. Cytoplasm, cytoskeleton, spindle {ECO:0000269|PubMed:26789871}.	DISEASE: Oocyte maturation defect 2 (OOMD2) [MIM:616780]: An autosomal dominant infertility disorder caused by defective oocyte maturation. Oocytes are arrested at metaphase I, and have an abnormal or no detectable spindle on polarization microscopy. {ECO:0000269|PubMed:26789871, ECO:0000269|PubMed:27273344}. Note=The disease is caused by variants affecting the gene represented in this entry.	microtubule cytoskeleton organization [GO:0000226]; microtubule-based process [GO:0007017]; mitotic cell cycle [GO:0000278]; oocyte maturation [GO:0001556]; spindle assembly involved in female meiosis [GO:0007056]	GTP binding [GO:0005525]; structural constituent of cytoskeleton [GO:0005200]	cytoplasm [GO:0005737]; extracellular exosome [GO:0070062]; intercellular bridge [GO:0045171]; meiotic spindle [GO:0072687]; microtubule [GO:0005874]; microtubule cytoskeleton [GO:0015630]; mitotic spindle [GO:0072686]	GO:0000226; GO:0000278; GO:0001556; GO:0005200; GO:0005525; GO:0005737; GO:0005874; GO:0007017; GO:0007056; GO:0015630; GO:0045171; GO:0070062; GO:0072686; GO:0072687	19.3952	19.0644	19.0919	18.479	18.954	18.6503	18.3447	18.0601	18.0468	17.8613
ARHGAP31_Q2M1Z3	-0.403552	-1.10648	-1.01918	-0.520714	-1.1568	0.385479	0.536818	1.0256	1.8095	0.449323	ARHGAP31	Rho GTPase-activating protein 31	Q2M1Z3	0.305946	0.0010492	0.0380953	-0.305946	sp|Q2M1Z3|RHG31_HUMAN Rho GTPase-activating protein 31 OS=Homo sapiens OX=9606 GN=ARHGAP31 PE=1 SV=2	FUNCTION: Functions as a GTPase-activating protein (GAP) for RAC1 and CDC42. Required for cell spreading, polarized lamellipodia formation and cell migration. {ECO:0000269|PubMed:12192056, ECO:0000269|PubMed:16519628}.	SUBCELLULAR LOCATION: Cell projection, lamellipodium. Cell junction, focal adhesion {ECO:0000250}.	DISEASE: Adams-Oliver syndrome 1 (AOS1) [MIM:100300]: A disorder characterized by the congenital absence of skin (aplasia cutis congenita) in combination with transverse limb defects. Aplasia cutis congenita can be located anywhere on the body, but in the vast majority of the cases, it is present on the posterior parietal region where it is often associated with an underlying defect of the pariet…	regulation of small GTPase mediated signal transduction [GO:0051056]; small GTPase mediated signal transduction [GO:0007264]	GTPase activator activity [GO:0005096]; SH3 domain binding [GO:0017124]	cytosol [GO:0005829]; focal adhesion [GO:0005925]; lamellipodium [GO:0030027]	GO:0005096; GO:0005829; GO:0005925; GO:0007264; GO:0017124; GO:0030027; GO:0051056	15.4541	15.3263	15.3421	15.4328	15.3171	15.5975	15.625	15.7139	15.8564	15.6091
SYNGR1_O43759	0.108824	1.20258	1.01659	-0.0841315	1.62393	-0.906685	-1.46929	-0.190159	-0.647202	-0.654461	SYNGR1	Synaptogyrin-1	O43759	0.743788	0.00105882	0.0381018	0.743788	sp|O43759|SNG1_HUMAN Synaptogyrin-1 OS=Homo sapiens OX=9606 GN=SYNGR1 PE=1 SV=2	FUNCTION: May play a role in regulated exocytosis. Modulates the localization of synaptophysin/SYP into synaptic-like microvesicles and may therefore play a role in synaptic-like microvesicle formation and/or maturation (By similarity). Involved in the regulation of short-term and long-term synaptic plasticity (By similarity). {ECO:0000250|UniProtKB:O55100, ECO:0000250|UniProtKB:Q62876}.	SUBCELLULAR LOCATION: Cytoplasmic vesicle, secretory vesicle, synaptic vesicle membrane {ECO:0000250|UniProtKB:Q62876}; Multi-pass membrane protein {ECO:0000250|UniProtKB:Q62876}. Melanosome {ECO:0000269|PubMed:17081065}. Note=Identified by mass spectrometry in melanosome fractions from stage I to stage IV. {ECO:0000269|PubMed:17081065}.		cellular response to leukemia inhibitory factor [GO:1990830]; protein targeting [GO:0006605]; regulated exocytosis [GO:0045055]; regulation of long-term neuronal synaptic plasticity [GO:0048169]; regulation of short-term neuronal synaptic plasticity [GO:0048172]; synaptic vesicle membrane organization [GO:0048499]		anchoring junction [GO:0070161]; azurophil granule membrane [GO:0035577]; integral component of membrane [GO:0016021]; integral component of synaptic vesicle membrane [GO:0030285]; melanosome [GO:0042470]; neuromuscular junction [GO:0031594]; plasma membrane [GO:0005886]; synaptic vesicle membrane [GO:0030672]	GO:0005886; GO:0006605; GO:0016021; GO:0030285; GO:0030672; GO:0031594; GO:0035577; GO:0042470; GO:0045055; GO:0048169; GO:0048172; GO:0048499; GO:0070161; GO:1990830	15.437	15.9628	15.8734	15.3442	16.1654	14.9487	14.6783	15.2932	15.0735	15.07
GNAO1_P09471	0.78143	0.862226	1.04482	0.348765	0.92211	-1.57044	-1.57126	-0.42166	0.244162	-0.640159	GNAO1	Guanine nucleotide-binding protein G(o) subunit alpha	P09471	0.471089	0.00106955	0.0381018	0.471089	sp|P09471|GNAO_HUMAN Guanine nucleotide-binding protein G(o) subunit alpha OS=Homo sapiens OX=9606 GN=GNAO1 PE=1 SV=4	FUNCTION: Guanine nucleotide-binding proteins (G proteins) are involved as modulators or transducers in various transmembrane signaling systems. The G(o) protein function is not clear. Stimulated by RGS14.	SUBCELLULAR LOCATION: Cell membrane {ECO:0000250|UniProtKB:P18872}. Membrane {ECO:0000305}; Lipid-anchor {ECO:0000305}.	DISEASE: Developmental and epileptic encephalopathy 17 (DEE17) [MIM:615473]: A severe neurologic disorder characterized by onset of intractable seizures in the first weeks or months of life and usually associated with EEG abnormalities. Affected infants have very poor psychomotor development and may have brain abnormalities, such as cerebral atrophy or thin corpus callosum. Some patients may show…	adenylate cyclase-modulating G protein-coupled receptor signaling pathway [GO:0007188]; dopamine receptor signaling pathway [GO:0007212]; muscle contraction [GO:0006936]	corticotropin-releasing hormone receptor 1 binding [GO:0051430]; G protein-coupled receptor binding [GO:0001664]; G protein-coupled serotonin receptor binding [GO:0031821]; G-protein beta/gamma-subunit complex binding [GO:0031683]; GTP binding [GO:0005525]; GTPase activity [GO:0003924]; metal ion binding [GO:0046872]; mu-type opioid receptor binding [GO:0031852]	heterotrimeric G-protein complex [GO:0005834]; plasma membrane [GO:0005886]	GO:0001664; GO:0003924; GO:0005525; GO:0005834; GO:0005886; GO:0006936; GO:0007188; GO:0007212; GO:0031683; GO:0031821; GO:0031852; GO:0046872; GO:0051430	18.426	18.45	18.5043	18.2973	18.4678	17.7264	17.7262	18.0681	18.2662	18.0031
FYN_P06241	0.912309	0.643719	1.63745	-0.407961	1.1442	-1.03443	-0.939664	-0.582775	-0.26129	-1.11156	FYN	Tyrosine-protein kinase Fyn	P06241	0.520921	0.00107204	0.0381018	0.520921	sp|P06241|FYN_HUMAN Tyrosine-protein kinase Fyn OS=Homo sapiens OX=9606 GN=FYN PE=1 SV=3	FUNCTION: Non-receptor tyrosine-protein kinase that plays a role in many biological processes including regulation of cell growth and survival, cell adhesion, integrin-mediated signaling, cytoskeletal remodeling, cell motility, immune response and axon guidance. Inactive FYN is phosphorylated on its C-terminal tail within the catalytic domain. Following activation by PKA, the protein subsequently…	SUBCELLULAR LOCATION: Cytoplasm. Nucleus. Cell membrane. Note=Present and active in lipid rafts. Palmitoylation is crucial for proper trafficking.		activated T cell proliferation [GO:0050798]; adaptive immune response [GO:0002250]; axon guidance [GO:0007411]; calcium ion transport [GO:0006816]; cell differentiation [GO:0030154]; cellular response to amyloid-beta [GO:1904646]; cellular response to glycine [GO:1905430]; cellular response to hydrogen peroxide [GO:0070301]; cellular response to L-glutamate [GO:1905232]; cellular response to plat…	alpha-tubulin binding [GO:0043014]; ATP binding [GO:0005524]; disordered domain specific binding [GO:0097718]; enzyme binding [GO:0019899]; ephrin receptor binding [GO:0046875]; growth factor receptor binding [GO:0070851]; identical protein binding [GO:0042802]; metal ion binding [GO:0046872]; non-membrane spanning protein tyrosine kinase activity [GO:0004715]; phospholipase activator activity [G…	actin filament [GO:0005884]; cell body [GO:0044297]; cytosol [GO:0005829]; dendrite [GO:0030425]; endosome [GO:0005768]; extrinsic component of cytoplasmic side of plasma membrane [GO:0031234]; glial cell projection [GO:0097386]; membrane raft [GO:0045121]; mitochondrion [GO:0005739]; nucleus [GO:0005634]; perinuclear endoplasmic reticulum [GO:0097038]; perinuclear region of cytoplasm [GO:0048471…	GO:0000304; GO:0001764; GO:0002223; GO:0002250; GO:0002862; GO:0003015; GO:0004713; GO:0004715; GO:0005102; GO:0005524; GO:0005634; GO:0005739; GO:0005768; GO:0005829; GO:0005884; GO:0005886; GO:0006468; GO:0006816; GO:0007169; GO:0007249; GO:0007411; GO:0007612; GO:0007631; GO:0008360; GO:0010629; GO:0010730; GO:0010976; GO:0014069; GO:0016004; GO:0016567; GO:0018108; GO:0019899; GO:0030154; GO:…	15.8588	15.7698	16.0992	15.4213	15.9357	15.2137	15.2451	15.3634	15.4699	15.1881
COPS2_P61201	-0.859721	-1.17351	-1.07095	-0.0443542	-0.900609	0.366877	0.712534	1.90886	0.336781	0.724088	COPS2	COP9 signalosome complex subunit 2	P61201	0.379564	0.00107296	0.0381018	-0.379564	sp|P61201|CSN2_HUMAN COP9 signalosome complex subunit 2 OS=Homo sapiens OX=9606 GN=COPS2 PE=1 SV=1	FUNCTION: Essential component of the COP9 signalosome complex (CSN), a complex involved in various cellular and developmental processes. The CSN complex is an essential regulator of the ubiquitin (Ubl) conjugation pathway by mediating the deneddylation of the cullin subunits of SCF-type E3 ligase complexes, leading to decrease the Ubl ligase activity of SCF-type complexes such as SCF, CSA or DDB2…	SUBCELLULAR LOCATION: Cytoplasm {ECO:0000269|PubMed:9535219}. Nucleus {ECO:0000269|PubMed:10207062}.		inner cell mass cell proliferation [GO:0001833]; negative regulation of nucleic acid-templated transcription [GO:1903507]; negative regulation of transcription by RNA polymerase II [GO:0000122]; neuron differentiation [GO:0030182]; protein deneddylation [GO:0000338]; protein neddylation [GO:0045116]; protein phosphorylation [GO:0006468]; regulation of protein neddylation [GO:2000434]; signal tran…	transcription corepressor activity [GO:0003714]	COP9 signalosome [GO:0008180]; cytoplasm [GO:0005737]; cytosol [GO:0005829]; nucleoplasm [GO:0005654]; nucleus [GO:0005634]	GO:0000122; GO:0000338; GO:0001833; GO:0001834; GO:0003714; GO:0005634; GO:0005654; GO:0005737; GO:0005829; GO:0006366; GO:0006468; GO:0007165; GO:0008180; GO:0030182; GO:0035914; GO:0045116; GO:1903507; GO:2000434	17.6485	17.575	17.599	17.8396	17.6389	17.936	18.017	18.2973	17.9289	18.0197
STX4_Q12846	1.17391	1.00054	0.918141	-0.0169446	1.19366	-0.505117	-0.37249	-1.02323	-1.4156	-0.952866	STX4	Syntaxin-4	Q12846	0.283749	0.00110723	0.0382409	0.283749	sp|Q12846|STX4_HUMAN Syntaxin-4 OS=Homo sapiens OX=9606 GN=STX4 PE=1 SV=2	FUNCTION: Plasma membrane t-SNARE that mediates docking of transport vesicles (By similarity). Necessary for the translocation of SLC2A4 from intracellular vesicles to the plasma membrane (By similarity). In neurons, recruited at neurite tips to membrane domains rich in the phospholipid 1-oleoyl-2-palmitoyl-PC (OPPC) which promotes neurite tip surface expression of the dopamine transporter SLC6A3…	SUBCELLULAR LOCATION: Cell membrane {ECO:0000250|UniProtKB:Q08850}; Single-pass type IV membrane protein {ECO:0000305}. Cell projection, neuron projection {ECO:0000250|UniProtKB:Q08850}. Note=Localizes to neurite tips in neuronal cells. {ECO:0000250|UniProtKB:Q08850}.		cellular response to interferon-gamma [GO:0071346]; cellular response to oxidative stress [GO:0034599]; cornified envelope assembly [GO:1903575]; exocytosis [GO:0006887]; intracellular protein transport [GO:0006886]; long-term synaptic potentiation [GO:0060291]; organelle fusion [GO:0048284]; positive regulation of catalytic activity [GO:0043085]; positive regulation of cell adhesion [GO:0045785]…	SNAP receptor activity [GO:0005484]; SNARE binding [GO:0000149]; sphingomyelin phosphodiesterase activator activity [GO:0016230]	basolateral plasma membrane [GO:0016323]; cell surface [GO:0009986]; cytosol [GO:0005829]; dendritic spine [GO:0043197]; endomembrane system [GO:0012505]; endosome [GO:0005768]; extracellular exosome [GO:0070062]; extracellular space [GO:0005615]; glutamatergic synapse [GO:0098978]; integral component of membrane [GO:0016021]; lamellipodium [GO:0030027]; lateral loop [GO:0043219]; membrane [GO:00…	GO:0000149; GO:0000322; GO:0002639; GO:0005484; GO:0005615; GO:0005768; GO:0005773; GO:0005802; GO:0005829; GO:0005886; GO:0006886; GO:0006887; GO:0006906; GO:0008021; GO:0008284; GO:0009986; GO:0012505; GO:0016020; GO:0016021; GO:0016230; GO:0016323; GO:0017157; GO:0030027; GO:0030335; GO:0030670; GO:0031201; GO:0031629; GO:0032589; GO:0034394; GO:0034599; GO:0035493; GO:0035749; GO:0035774; GO:…	17.7501	17.7213	17.7076	17.5522	17.7534	17.4711	17.4932	17.385	17.3198	17.3967
PPP1R1A_Q13522	-1.02001	-1.13475	-0.626914	0.471586	-1.54169	0.643286	0.309129	0.477775	1.28152	1.14007	PPP1R1A	Protein phosphatase 1 regulatory subunit 1A	Q13522	0.790331	0.0011094	0.0382409	-0.790331	sp|Q13522|PPR1A_HUMAN Protein phosphatase 1 regulatory subunit 1A OS=Homo sapiens OX=9606 GN=PPP1R1A PE=1 SV=2	FUNCTION: Inhibitor of protein-phosphatase 1. This protein may be important in hormonal control of glycogen metabolism. Hormones that elevate intracellular cAMP increase I-1 activity in many tissues. I-1 activation may impose cAMP control over proteins that are not directly phosphorylated by PKA. Following a rise in intracellular calcium, I-1 is inactivated by calcineurin (or PP2B). Does not inhi…			glycogen metabolic process [GO:0005977]; intracellular signal transduction [GO:0035556]	protein serine/threonine phosphatase inhibitor activity [GO:0004865]	cytoplasm [GO:0005737]	GO:0004865; GO:0005737; GO:0005977; GO:0035556	15.5287	15.4698	15.7303	16.2938	15.2611	16.3819	16.2105	16.297	16.7093	16.6368
C1orf21_Q9H246	0.888788	1.65363	0.166726	0.0465821	1.19336	-0.218654	-0.667345	-1.19117	-0.513214	-1.3587	C1orf21	Uncharacterized protein C1orf21	Q9H246	0.47123	0.00112226	0.0382409	0.47123	sp|Q9H246|CA021_HUMAN Uncharacterized protein C1orf21 OS=Homo sapiens OX=9606 GN=C1orf21 PE=1 SV=1								14.6961	14.9242	14.4807	14.4448	14.7869	14.3657	14.2319	14.0756	14.2778	14.0256
HELZ_P42694	0.713265	0.885384	1.3014	0.283503	0.82181	-0.0494678	-0.0110489	-1.50843	-1.14089	-1.29553	HELZ	Probable helicase with zinc finger domain	P42694	0.406558	0.00112245	0.0382409	0.406558	sp|P42694|HELZ_HUMAN Probable helicase with zinc finger domain OS=Homo sapiens OX=9606 GN=HELZ PE=1 SV=2	FUNCTION: May act as a helicase that plays a role in RNA metabolism in multiple tissues and organs within the developing embryo.	SUBCELLULAR LOCATION: Nucleus {ECO:0000305}.		post-transcriptional gene silencing by RNA [GO:0035194]	ATP binding [GO:0005524]; helicase activity [GO:0004386]; hydrolase activity [GO:0016787]; metal ion binding [GO:0046872]; RNA binding [GO:0003723]	cytosol [GO:0005829]; membrane [GO:0016020]; nucleus [GO:0005634]; P granule [GO:0043186]	GO:0003723; GO:0004386; GO:0005524; GO:0005634; GO:0005829; GO:0016020; GO:0016787; GO:0035194; GO:0043186; GO:0046872	12.1136	12.1573	12.2629	12.0046	12.1412	11.9201	11.9298	11.5499	11.6431	11.6039
COL4A1_P02462	1.11669	1.52696	-0.102516	-0.00406635	1.29126	-1.11506	-1.29947	-0.199244	-0.476356	-0.738191	COL4A1	Collagen alpha-1(IV) chain;Arresten	P02462	1.00786	0.00112802	0.0382409	1.00786	sp|P02462|CO4A1_HUMAN Collagen alpha-1(IV) chain OS=Homo sapiens OX=9606 GN=COL4A1 PE=1 SV=4	FUNCTION: Type IV collagen is the major structural component of glomerular basement membranes (GBM), forming a 'chicken-wire' meshwork together with laminins, proteoglycans and entactin/nidogen. {ECO:0000250|UniProtKB:P02463}.; FUNCTION: Arresten, comprising the C-terminal NC1 domain, inhibits angiogenesis and tumor formation. The C-terminal half is found to possess the anti-angiogenic activity. …	SUBCELLULAR LOCATION: Secreted, extracellular space, extracellular matrix, basement membrane {ECO:0000250|UniProtKB:P02463}.	DISEASE: Hereditary angiopathy with nephropathy aneurysms and muscle cramps (HANAC) [MIM:611773]: The clinical renal manifestations include hematuria and bilateral large cysts. Histologic analysis revealed complex basement membrane defects in kidney and skin. The systemic angiopathy appears to affect both small vessels and large arteries. {ECO:0000269|PubMed:18160688, ECO:0000269|PubMed:20818663}…	basement membrane organization [GO:0071711]; blood vessel morphogenesis [GO:0048514]; brain development [GO:0007420]; branching involved in blood vessel morphogenesis [GO:0001569]; cellular response to amino acid stimulus [GO:0071230]; collagen-activated tyrosine kinase receptor signaling pathway [GO:0038063]; epithelial cell differentiation [GO:0030855]; extracellular matrix organization [GO:003…	extracellular matrix structural constituent [GO:0005201]; extracellular matrix structural constituent conferring tensile strength [GO:0030020]; platelet-derived growth factor binding [GO:0048407]	basement membrane [GO:0005604]; collagen type IV trimer [GO:0005587]; collagen-containing extracellular matrix [GO:0062023]; endoplasmic reticulum lumen [GO:0005788]; extracellular matrix [GO:0031012]; extracellular region [GO:0005576]; extracellular space [GO:0005615]	GO:0001569; GO:0005201; GO:0005576; GO:0005587; GO:0005604; GO:0005615; GO:0005788; GO:0007420; GO:0007528; GO:0030020; GO:0030198; GO:0030855; GO:0031012; GO:0038063; GO:0048407; GO:0048514; GO:0061304; GO:0061333; GO:0062023; GO:0071230; GO:0071711	20.8288	21.0989	20.0264	20.0912	20.9437	19.36	19.2386	19.9627	19.7804	19.608
TSC22D2_O75157	-1.22434	-1.51305	-1.20336	0.594288	-0.548734	0.89168	0.816868	0.839463	0.54168	0.805503	TSC22D2	TSC22 domain family protein 2	O75157	0.577078	0.00113032	0.0382409	-0.577078	sp|O75157|T22D2_HUMAN TSC22 domain family protein 2 OS=Homo sapiens OX=9606 GN=TSC22D2 PE=1 SV=3				regulation of transcription by RNA polymerase II [GO:0006357]			GO:0006357	15.6237	15.5167	15.6314	16.2972	15.8739	16.4074	16.3797	16.3881	16.2778	16.3755
MRPL23_Q16540	1.01554	0.744422	1.71819	0.753112	-0.343492	-0.451908	-0.725217	-1.22977	-0.27236	-1.20852	MRPL23	39S ribosomal protein L23, mitochondrial	Q16540	0.596342	0.00113538	0.0382409	0.596342	sp|Q16540|RM23_HUMAN 39S ribosomal protein L23, mitochondrial OS=Homo sapiens OX=9606 GN=MRPL23 PE=1 SV=1		SUBCELLULAR LOCATION: Mitochondrion {ECO:0000269|PubMed:25278503, ECO:0000269|PubMed:25838379, ECO:0000269|PubMed:28892042}.		mitochondrial translation [GO:0032543]; translation [GO:0006412]	RNA binding [GO:0003723]; structural constituent of ribosome [GO:0003735]	fibrillar center [GO:0001650]; mitochondrial inner membrane [GO:0005743]; mitochondrial large ribosomal subunit [GO:0005762]; mitochondrion [GO:0005739]	GO:0001650; GO:0003723; GO:0003735; GO:0005739; GO:0005743; GO:0005762; GO:0006412; GO:0032543	16.9888	16.8848	17.2582	16.8881	16.4676	16.426	16.3212	16.1278	16.4949	16.1359
GNA14_O95837	1.4827	1.39565	0.406412	-0.0621087	0.791432	-1.31168	-0.616348	-0.514977	-0.306669	-1.26441	GNA14	Guanine nucleotide-binding protein subunit alpha-14	O95837	0.395506	0.00114313	0.0382409	0.395506	sp|O95837|GNA14_HUMAN Guanine nucleotide-binding protein subunit alpha-14 OS=Homo sapiens OX=9606 GN=GNA14 PE=1 SV=1	FUNCTION: Guanine nucleotide-binding proteins (G proteins) are involved as modulators or transducers in various transmembrane signaling systems.			action potential [GO:0001508]; adenylate cyclase-modulating G protein-coupled receptor signaling pathway [GO:0007188]; phospholipase C-activating dopamine receptor signaling pathway [GO:0060158]; signal transduction [GO:0007165]	G protein-coupled receptor binding [GO:0001664]; G-protein beta/gamma-subunit complex binding [GO:0031683]; GTP binding [GO:0005525]; GTPase activity [GO:0003924]; metal ion binding [GO:0046872]	extracellular exosome [GO:0070062]; heterotrimeric G-protein complex [GO:0005834]; plasma membrane [GO:0005886]	GO:0001508; GO:0001664; GO:0003924; GO:0005525; GO:0005834; GO:0005886; GO:0007165; GO:0007188; GO:0031683; GO:0046872; GO:0060158; GO:0070062	15.1413	15.1198	14.8761	14.7607	14.971	14.4529	14.6242	14.6492	14.7005	14.4646
DUSP26_Q9BV47	-1.22116	-1.65671	-0.254039	0.251561	-0.989354	0.67112	0.251052	1.13976	1.22867	0.57909	DUSP26	Dual specificity protein phosphatase 26	Q9BV47	0.654457	0.00114639	0.0382409	-0.654457	sp|Q9BV47|DUS26_HUMAN Dual specificity protein phosphatase 26 OS=Homo sapiens OX=9606 GN=DUSP26 PE=1 SV=1	FUNCTION: Inactivates MAPK1 and MAPK3 which leads to dephosphorylation of heat shock factor protein 4 and a reduction in its DNA-binding activity. Inhibits MAP kinase p38 by dephosphorylating it and inhibits p38-mediated apoptosis in anaplastic thyroid cancer cells. Can also induce activation of MAP kinase p38 and c-Jun N-terminal kinase (JNK). {ECO:0000269|PubMed:15796912, ECO:0000269|PubMed:165…	SUBCELLULAR LOCATION: Cytoplasm. Nucleus. Golgi apparatus.		negative regulation of ERK1 and ERK2 cascade [GO:0070373]; negative regulation of MAPK cascade [GO:0043409]; negative regulation of transcription by RNA polymerase II [GO:0000122]; positive regulation of cell adhesion [GO:0045785]; protein dephosphorylation [GO:0006470]	MAP kinase phosphatase activity [GO:0033549]; myosin phosphatase activity [GO:0017018]; p53 binding [GO:0002039]; phosphoprotein phosphatase activity [GO:0004721]; protein tyrosine phosphatase activity [GO:0004725]; protein tyrosine/serine/threonine phosphatase activity [GO:0008138]; RNA polymerase II-specific DNA-binding transcription factor binding [GO:0061629]	cytoplasm [GO:0005737]; extracellular exosome [GO:0070062]; Golgi apparatus [GO:0005794]; nucleoplasm [GO:0005654]; nucleus [GO:0005634]	GO:0000122; GO:0002039; GO:0004721; GO:0004725; GO:0005634; GO:0005654; GO:0005737; GO:0005794; GO:0006470; GO:0008138; GO:0017018; GO:0033549; GO:0043409; GO:0045785; GO:0061629; GO:0070062; GO:0070373	13.0443	12.8601	13.4532	13.6669	13.1423	13.8443	13.6667	14.0425	14.0801	13.8054
CD46_P15529	1.26702	1.26534	1.28187	0.223679	0.0769759	-1.27327	-0.86544	-0.35819	-0.430192	-1.18779	CD46	Membrane cofactor protein	P15529	0.33318	0.00114715	0.0382409	0.33318	sp|P15529|MCP_HUMAN Membrane cofactor protein OS=Homo sapiens OX=9606 GN=CD46 PE=1 SV=3	FUNCTION: Acts as a cofactor for complement factor I, a serine protease which protects autologous cells against complement-mediated injury by cleaving C3b and C4b deposited on host tissue. May be involved in the fusion of the spermatozoa with the oocyte during fertilization. Also acts as a costimulatory factor for T-cells which induces the differentiation of CD4+ into T-regulatory 1 cells. T-regu…	SUBCELLULAR LOCATION: Cytoplasmic vesicle, secretory vesicle, acrosome inner membrane {ECO:0000269|PubMed:12112588, ECO:0000269|PubMed:14597734, ECO:0000269|PubMed:15307194}; Single-pass type I membrane protein {ECO:0000269|PubMed:12112588, ECO:0000269|PubMed:14597734, ECO:0000269|PubMed:15307194}. Note=Inner acrosomal membrane of spermatozoa. Internalized upon binding of Measles virus, Herpesvir…	DISEASE: Hemolytic uremic syndrome atypical 2 (AHUS2) [MIM:612922]: An atypical form of hemolytic uremic syndrome. It is a complex genetic disease characterized by microangiopathic hemolytic anemia, thrombocytopenia, renal failure and absence of episodes of enterocolitis and diarrhea. In contrast to typical hemolytic uremic syndrome, atypical forms have a poorer prognosis, with higher death rates…	adaptive immune response [GO:0002250]; complement activation, classical pathway [GO:0006958]; innate immune response [GO:0045087]; negative regulation of complement activation, classical pathway [GO:0045959]; negative regulation of gene expression [GO:0010629]; positive regulation of gene expression [GO:0010628]; positive regulation of interleukin-10 production [GO:0032733]; positive regulation o…	cadherin binding [GO:0045296]; signaling receptor activity [GO:0038023]; virus receptor activity [GO:0001618]	cell surface [GO:0009986]; extracellular exosome [GO:0070062]; focal adhesion [GO:0005925]; inner acrosomal membrane [GO:0002079]; integral component of plasma membrane [GO:0005887]; plasma membrane [GO:0005886]	GO:0001618; GO:0002079; GO:0002250; GO:0002456; GO:0005886; GO:0005887; GO:0005925; GO:0006958; GO:0007338; GO:0008593; GO:0009986; GO:0010628; GO:0010629; GO:0032733; GO:0035581; GO:0038023; GO:0042102; GO:0043382; GO:0045087; GO:0045296; GO:0045591; GO:0045959; GO:0070062; GO:0071636	16.3648	16.3644	16.3678	16.1536	16.1239	15.8506	15.9331	16.0358	16.0212	15.8679
MYH10_P35580	0.596689	1.44766	-0.00684672	-0.0857103	1.8825	-0.850747	-0.843006	-0.634856	-0.638799	-0.866887	MYH10	Myosin-10	P35580	0.88776	0.00114718	0.0382409	0.88776	sp|P35580|MYH10_HUMAN Myosin-10 OS=Homo sapiens OX=9606 GN=MYH10 PE=1 SV=3	FUNCTION: Cellular myosin that appears to play a role in cytokinesis, cell shape, and specialized functions such as secretion and capping. Involved with LARP6 in the stabilization of type I collagen mRNAs for CO1A1 and CO1A2. During cell spreading, plays an important role in cytoskeleton reorganization, focal contacts formation (in the central part but not the margins of spreading cells), and lam…	SUBCELLULAR LOCATION: Cell projection, lamellipodium {ECO:0000269|PubMed:20052411, ECO:0000269|PubMed:22480440}. Note=Colocalizes with MCC at the leading edge of migrating cells.	DISEASE: Note=Associated with severe intellectual disability, microcephaly, and feeding difficulties as well as cerebral atrophy. {ECO:0000269|PubMed:25003005, ECO:0000269|PubMed:25356899}.	actin filament-based movement [GO:0030048]; actomyosin structure organization [GO:0031032]; cell adhesion [GO:0007155]; mitotic cytokinesis [GO:0000281]; positive regulation of protein secretion [GO:0050714]; regulation of cell shape [GO:0008360]	actin binding [GO:0003779]; actin filament binding [GO:0051015]; ADP binding [GO:0043531]; ATP binding [GO:0005524]; calmodulin binding [GO:0005516]; microfilament motor activity [GO:0000146]; mRNA 5'-UTR binding [GO:0048027]; RNA stem-loop binding [GO:0035613]	actomyosin [GO:0042641]; cell cortex [GO:0005938]; cleavage furrow [GO:0032154]; cytoplasm [GO:0005737]; cytosol [GO:0005829]; extracellular exosome [GO:0070062]; lamellipodium [GO:0030027]; midbody [GO:0030496]; myosin complex [GO:0016459]; myosin filament [GO:0032982]; myosin II complex [GO:0016460]; myosin II filament [GO:0097513]; nucleus [GO:0005634]; polysome [GO:0005844]; stress fiber [GO:…	GO:0000146; GO:0000281; GO:0001725; GO:0003779; GO:0005516; GO:0005524; GO:0005634; GO:0005737; GO:0005829; GO:0005844; GO:0005938; GO:0007155; GO:0008360; GO:0016459; GO:0016460; GO:0030027; GO:0030048; GO:0030496; GO:0031032; GO:0032154; GO:0032982; GO:0035613; GO:0042641; GO:0043531; GO:0048027; GO:0050714; GO:0051015; GO:0070062; GO:0097513	21.3483	21.8408	20.9989	20.9533	22.0925	20.5105	20.5149	20.6354	20.6331	20.5011
PLCL2_Q9UPR0	-1.32785	-0.951417	-0.673801	0.590934	-1.53368	0.512575	0.671834	0.816811	0.936783	0.95781	PLCL2	Inactive phospholipase C-like protein 2	Q9UPR0	0.565917	0.00114961	0.0382409	-0.565917	sp|Q9UPR0|PLCL2_HUMAN Inactive phospholipase C-like protein 2 OS=Homo sapiens OX=9606 GN=PLCL2 PE=1 SV=2	FUNCTION: May play an role in the regulation of Ins(1,4,5)P3 around the endoplasmic reticulum. {ECO:0000250}.	SUBCELLULAR LOCATION: Cytoplasm. Note=Predominantly localized to perinuclear areas in both myoblast and myotube C2C12 cells. {ECO:0000250}.		B cell proliferation involved in immune response [GO:0002322]; B-1a B cell differentiation [GO:0002337]; gamma-aminobutyric acid signaling pathway [GO:0007214]; lipid metabolic process [GO:0006629]; negative regulation of B cell receptor signaling pathway [GO:0050859]; negative regulation of cold-induced thermogenesis [GO:0120163]; phosphatidylinositol-mediated signaling [GO:0048015]; positive re…	GABA receptor binding [GO:0050811]; inositol 1,4,5 trisphosphate binding [GO:0070679]; phosphatidylinositol phospholipase C activity [GO:0004435]	cytoplasm [GO:0005737]	GO:0002322; GO:0002337; GO:0004435; GO:0005737; GO:0006629; GO:0007214; GO:0032228; GO:0048015; GO:0050811; GO:0050859; GO:0070679; GO:0120163; GO:1900122	17.7628	17.8995	18.0003	18.4596	17.688	18.4311	18.489	18.5416	18.5852	18.5928
EIF1_P41567	-0.350982	-1.74849	-1.20758	-0.316478	-0.390373	0.369665	0.827862	1.15364	1.36688	0.295857	EIF1	Eukaryotic translation initiation factor 1;Eukaryotic translation initiation factor 1b	P41567	0.393328	0.00115762	0.0382409	-0.393328	sp|P41567|EIF1_HUMAN Eukaryotic translation initiation factor 1 OS=Homo sapiens OX=9606 GN=EIF1 PE=1 SV=1;sp|O60739|EIF1B_HUMAN Eukaryotic translation initiation factor 1b OS=Homo sapiens OX=9606 GN=EIF1B PE=1 SV=2	FUNCTION: Necessary for scanning and involved in initiation site selection. Promotes the assembly of 48S ribosomal complexes at the authentic initiation codon of a conventional capped mRNA.			regulation of translational initiation [GO:0006446]	ribosomal small subunit binding [GO:0043024]; RNA binding [GO:0003723]; translation factor activity, RNA binding [GO:0008135]; translation initiation factor activity [GO:0003743]	cytoplasm [GO:0005737]; eukaryotic 43S preinitiation complex [GO:0016282]; nucleus [GO:0005634]	GO:0003723; GO:0003743; GO:0005634; GO:0005737; GO:0006446; GO:0008135; GO:0016282; GO:0043024	16.959	16.6167	16.7492	16.9675	16.9494	17.1356	17.2478	17.3276	17.3799	17.1175
CASK_O14936	0.892955	1.09288	0.917297	-0.510069	1.58543	-0.627495	-0.914791	-0.781182	-0.525313	-1.12972	CASK	Peripheral plasma membrane protein CASK	O14936	0.425776	0.00115971	0.0382409	0.425776	sp|O14936|CSKP_HUMAN Peripheral plasma membrane protein CASK OS=Homo sapiens OX=9606 GN=CASK PE=1 SV=3	FUNCTION: Multidomain scaffolding Mg(2+)-independent protein kinase that catalyzes the phosphotransfer from ATP to proteins such as NRXN1, and plays a role in synaptic transmembrane protein anchoring and ion channel trafficking (PubMed:18423203). Contributes to neural development and regulation of gene expression via interaction with the transcription factor TBR1. Binds to cell-surface proteins, …	SUBCELLULAR LOCATION: Nucleus {ECO:0000250|UniProtKB:Q62915}. Cytoplasm {ECO:0000250|UniProtKB:Q62915}. Cell membrane {ECO:0000250|UniProtKB:Q62915}; Peripheral membrane protein {ECO:0000250|UniProtKB:Q62915}.	DISEASE: Intellectual developmental disorder with microcephaly and pontine and cerebellar hypoplasia (MICPCH) [MIM:300749]: A disorder characterized by significantly below average general intellectual functioning associated with impairments in adaptive behavior and manifested during the developmental period. Affected individuals can manifest a severe phenotype consisting of severe intellectual de…	calcium ion import [GO:0070509]; cell adhesion [GO:0007155]; establishment of localization in cell [GO:0051649]; negative regulation of cell-matrix adhesion [GO:0001953]; negative regulation of cellular response to growth factor stimulus [GO:0090288]; negative regulation of keratinocyte proliferation [GO:0010839]; negative regulation of wound healing [GO:0061045]; positive regulation of calcium i…	ATP binding [GO:0005524]; calmodulin binding [GO:0005516]; guanylate kinase activity [GO:0004385]; neurexin family protein binding [GO:0042043]; protein serine kinase activity [GO:0106310]; protein serine/threonine kinase activity [GO:0004674]; signaling receptor binding [GO:0005102]	actin cytoskeleton [GO:0015629]; basement membrane [GO:0005604]; basolateral plasma membrane [GO:0016323]; cell-cell junction [GO:0005911]; ciliary membrane [GO:0060170]; cytoplasm [GO:0005737]; cytosol [GO:0005829]; focal adhesion [GO:0005925]; nuclear lamina [GO:0005652]; nuclear matrix [GO:0016363]; nucleolus [GO:0005730]; plasma membrane [GO:0005886]; presynaptic membrane [GO:0042734]; Schaff…	GO:0001953; GO:0004385; GO:0004674; GO:0005102; GO:0005516; GO:0005524; GO:0005604; GO:0005652; GO:0005730; GO:0005737; GO:0005829; GO:0005886; GO:0005911; GO:0005925; GO:0006468; GO:0007155; GO:0008104; GO:0010839; GO:0015629; GO:0016323; GO:0016363; GO:0031982; GO:0042043; GO:0042734; GO:0045944; GO:0046928; GO:0051649; GO:0060170; GO:0061045; GO:0070509; GO:0090280; GO:0090288; GO:0098685; GO:…	17.6626	17.7161	17.6692	17.2873	17.8479	17.2558	17.179	17.2147	17.2832	17.1215
IST1_P53990	-1.72525	-0.922465	-0.116626	-0.185549	-1.06584	1.10764	0.204979	0.494834	0.968918	1.23935	IST1	IST1 homolog	P53990	0.387496	0.00118615	0.0386345	-0.387496	sp|P53990|IST1_HUMAN IST1 homolog OS=Homo sapiens OX=9606 GN=IST1 PE=1 SV=1	FUNCTION: ESCRT-III-like protein involved in cytokinesis, nuclear envelope reassembly and endosomal tubulation (PubMed:19129479, PubMed:26040712, PubMed:28242692). Is required for efficient abscission during cytokinesis (PubMed:19129479). Involved in recruiting VPS4A and/or VPS4B to the midbody of dividing cells (PubMed:19129480, PubMed:19129479). During late anaphase, involved in nuclear envelop…	SUBCELLULAR LOCATION: Cytoplasmic vesicle {ECO:0000269|PubMed:19129479, ECO:0000269|PubMed:19129480}. Cytoplasm, cytoskeleton, microtubule organizing center, centrosome {ECO:0000269|PubMed:20719964}. Midbody {ECO:0000269|PubMed:20719964}. Nucleus envelope {ECO:0000269|PubMed:26040712, ECO:0000269|PubMed:28242692}. Note=Localizes to centrosome and midbody of dividing cells (PubMed:19129480, PubMed…		abscission [GO:0009838]; cell division [GO:0051301]; collateral sprouting [GO:0048668]; cytoskeleton-dependent cytokinesis [GO:0061640]; ESCRT III complex disassembly [GO:1904903]; establishment of protein localization [GO:0045184]; multivesicular body assembly [GO:0036258]; positive regulation of collateral sprouting [GO:0048672]; positive regulation of proteolysis [GO:0045862]; protein localiza…	cadherin binding [GO:0045296]; identical protein binding [GO:0042802]; MIT domain binding [GO:0090541]; protein domain specific binding [GO:0019904]; protein-containing complex binding [GO:0044877]	azurophil granule lumen [GO:0035578]; centrosome [GO:0005813]; cytosol [GO:0005829]; endoplasmic reticulum-Golgi intermediate compartment [GO:0005793]; extracellular exosome [GO:0070062]; extracellular region [GO:0005576]; Flemming body [GO:0090543]; intracellular membrane-bounded organelle [GO:0043231]; midbody [GO:0030496]; nuclear envelope [GO:0005635]	GO:0005576; GO:0005635; GO:0005793; GO:0005813; GO:0005829; GO:0008104; GO:0009838; GO:0015031; GO:0019076; GO:0019904; GO:0030496; GO:0035578; GO:0036258; GO:0042802; GO:0043231; GO:0044877; GO:0045184; GO:0045296; GO:0045862; GO:0046745; GO:0048668; GO:0048672; GO:0051301; GO:0061640; GO:0070062; GO:0090541; GO:0090543; GO:1904903	16.9424	17.1361	17.3305	17.3139	17.1015	17.6258	17.4081	17.478	17.5924	17.6576
DCLK2_Q8N568	1.81011	0.207103	1.11065	-0.30023	1.10974	-0.784637	-0.685746	-0.873669	-0.738097	-0.855226	DCLK2	Serine/threonine-protein kinase DCLK2	Q8N568	0.467302	0.00120032	0.0386345	0.467302	sp|Q8N568|DCLK2_HUMAN Serine/threonine-protein kinase DCLK2 OS=Homo sapiens OX=9606 GN=DCLK2 PE=1 SV=4	FUNCTION: Protein kinase with a significantly reduced C(a2+)/CAM affinity and dependence compared to other members of the CaMK family. May play a role in the down-regulation of CRE-dependent gene activation probably by phosphorylation of the CREB coactivator CRTC2/TORC2 and the resulting retention of TORC2 in the cytoplasm (By similarity). {ECO:0000250}.	SUBCELLULAR LOCATION: Cytoplasm, cytoskeleton. Note=Colocalizes with microtubules. {ECO:0000250}.		hippocampus development [GO:0021766]; intracellular signal transduction [GO:0035556]; microtubule cytoskeleton organization [GO:0000226]; negative regulation of protein localization to nucleus [GO:1900181]; peptidyl-serine phosphorylation [GO:0018105]; protein localization to nucleus [GO:0034504]; pyramidal neuron development [GO:0021860]	ATP binding [GO:0005524]; microtubule binding [GO:0008017]; protein serine kinase activity [GO:0106310]; protein serine/threonine kinase activity [GO:0004674]	cytoplasm [GO:0005737]; cytoskeleton [GO:0005856]	GO:0000226; GO:0004674; GO:0005524; GO:0005737; GO:0005856; GO:0008017; GO:0018105; GO:0021766; GO:0021860; GO:0034504; GO:0035556; GO:0106310; GO:1900181	17.7599	17.2842	17.5523	17.1337	17.5521	16.99	17.0193	16.9636	17.0038	16.969
COL4A2_P08572	1.5882	1.12498	-0.073866	-0.11842	1.32713	-1.2968	-0.84297	-0.610657	-0.370291	-0.727311	COL4A2	Collagen alpha-2(IV) chain;Canstatin	P08572	0.7098	0.00120484	0.0386345	0.7098	sp|P08572|CO4A2_HUMAN Collagen alpha-2(IV) chain OS=Homo sapiens OX=9606 GN=COL4A2 PE=1 SV=4	FUNCTION: Type IV collagen is the major structural component of glomerular basement membranes (GBM), forming a 'chicken-wire' meshwork together with laminins, proteoglycans and entactin/nidogen.; FUNCTION: Canstatin, a cleavage product corresponding to the collagen alpha 2(IV) NC1 domain, possesses both anti-angiogenic and anti-tumor cell activity. It inhibits proliferation and migration of endot…	SUBCELLULAR LOCATION: Secreted, extracellular space, extracellular matrix, basement membrane.	DISEASE: Brain small vessel disease 2 (BSVD2) [MIM:614483]: An autosomal dominant cerebrovascular disorder with variable manifestations reflecting the location and severity of the vascular defect. BSVD2 features include intracranial hemorrage, fluid-filled cysts or cavities within the cerebral hemispheres, delayed psychomotor development, hemiplegia, spasticity and seizures. {ECO:0000269|PubMed:2…	aging [GO:0007568]; angiogenesis [GO:0001525]; cellular response to transforming growth factor beta stimulus [GO:0071560]; collagen-activated tyrosine kinase receptor signaling pathway [GO:0038063]; endodermal cell differentiation [GO:0035987]; extracellular matrix organization [GO:0030198]; negative regulation of angiogenesis [GO:0016525]; response to activity [GO:0014823]; transcription, DNA-te…	extracellular matrix structural constituent [GO:0005201]; extracellular matrix structural constituent conferring tensile strength [GO:0030020]	collagen type IV trimer [GO:0005587]; collagen-containing extracellular matrix [GO:0062023]; endoplasmic reticulum lumen [GO:0005788]; extracellular exosome [GO:0070062]; extracellular matrix [GO:0031012]; extracellular region [GO:0005576]; extracellular space [GO:0005615]	GO:0001525; GO:0005201; GO:0005576; GO:0005587; GO:0005615; GO:0005788; GO:0006351; GO:0007568; GO:0014823; GO:0016525; GO:0030020; GO:0030198; GO:0031012; GO:0035987; GO:0038063; GO:0062023; GO:0070062; GO:0071560	19.6963	19.4827	18.9299	18.9093	19.5759	18.3659	18.5752	18.6823	18.7932	18.6285
IRF6_O14896	0.363003	0.208092	1.75111	0.608639	0.93423	-1.77103	-0.952737	-0.253006	-0.523212	-0.365095	IRF6	Interferon regulatory factor 6	O14896	0.620034	0.00122518	0.0386345	0.620034	sp|O14896|IRF6_HUMAN Interferon regulatory factor 6 OS=Homo sapiens OX=9606 GN=IRF6 PE=1 SV=1	FUNCTION: Probable DNA-binding transcriptional activator. Key determinant of the keratinocyte proliferation-differentiation switch involved in appropriate epidermal development (By similarity). Plays a role in regulating mammary epithelial cell proliferation (By similarity). May regulate WDR65 transcription (By similarity). {ECO:0000250}.	SUBCELLULAR LOCATION: Nucleus {ECO:0000305}. Cytoplasm {ECO:0000269|PubMed:16049006, ECO:0000269|PubMed:18212048}. Note=Translocates to nucleus in response to an activating signal. {ECO:0000250}.	DISEASE: Van der Woude syndrome 1 (VWS1) [MIM:119300]: An autosomal dominant developmental disorder characterized by lower lip pits, cleft lip and/or cleft palate. {ECO:0000269|PubMed:12219090, ECO:0000269|PubMed:12920575, ECO:0000269|PubMed:14618417, ECO:0000269|PubMed:14640121, ECO:0000269|PubMed:15300989, ECO:0000269|PubMed:17122170, ECO:0000269|PubMed:18478600, ECO:0000269|PubMed:19036739}. N…	cell development [GO:0048468]; cranial skeletal system development [GO:1904888]; immune system process [GO:0002376]; keratinocyte differentiation [GO:0030216]; keratinocyte proliferation [GO:0043616]; limb development [GO:0060173]; mammary gland epithelial cell differentiation [GO:0060644]; negative regulation of cell population proliferation [GO:0008285]; negative regulation of keratinocyte prol…	DNA binding [GO:0003677]; DNA-binding transcription activator activity, RNA polymerase II-specific [GO:0001228]; DNA-binding transcription factor activity [GO:0003700]; DNA-binding transcription factor activity, RNA polymerase II-specific [GO:0000981]; RNA polymerase II cis-regulatory region sequence-specific DNA binding [GO:0000978]; sequence-specific DNA binding [GO:0043565]; sequence-specific …	cell junction [GO:0030054]; chromatin [GO:0000785]; cytoplasm [GO:0005737]; cytosol [GO:0005829]; extracellular exosome [GO:0070062]; nucleoplasm [GO:0005654]; nucleus [GO:0005634]	GO:0000785; GO:0000978; GO:0000981; GO:0001228; GO:0002376; GO:0003677; GO:0003700; GO:0005634; GO:0005654; GO:0005737; GO:0005829; GO:0006357; GO:0008285; GO:0010839; GO:0030054; GO:0030216; GO:0043565; GO:0043616; GO:0045893; GO:0045944; GO:0048468; GO:0060021; GO:0060173; GO:0060644; GO:0070062; GO:0072089; GO:1904888; GO:1990837; GO:2000647	17.5818	17.5196	18.1385	17.6803	17.8109	16.7259	17.0541	17.3347	17.2264	17.2898
SMARCD3_Q6STE5	-1.29852	-1.18533	-0.94658	0.306273	-0.874291	0.914948	0.586148	0.0692547	1.11078	1.31732	SMARCD3	SWI/SNF-related matrix-associated actin-dependent regulator of chromatin subfamily D member 3	Q6STE5	0.395006	0.00122815	0.0386345	-0.395006	sp|Q6STE5|SMRD3_HUMAN SWI/SNF-related matrix-associated actin-dependent regulator of chromatin subfamily D member 3 OS=Homo sapiens OX=9606 GN=SMARCD3 PE=1 SV=1	FUNCTION: Involved in transcriptional activation and repression of select genes by chromatin remodeling (alteration of DNA-nucleosome topology). Component of SWI/SNF chromatin remodeling complexes that carry out key enzymatic activities, changing chromatin structure by altering DNA-histone contacts within a nucleosome in an ATP-dependent manner. Stimulates nuclear receptor mediated transcription.…	SUBCELLULAR LOCATION: Nucleus {ECO:0000269|PubMed:14701856}.		cardiac right ventricle formation [GO:0003219]; chromatin remodeling [GO:0006338]; muscle cell differentiation [GO:0042692]; nervous system development [GO:0007399]; neural retina development [GO:0003407]; nucleosome disassembly [GO:0006337]; positive regulation of cell differentiation [GO:0045597]; positive regulation of double-strand break repair [GO:2000781]; positive regulation of myoblast di…	DNA-binding transcription factor binding [GO:0140297]; nuclear receptor binding [GO:0016922]; nuclear receptor coactivator activity [GO:0030374]; signaling receptor binding [GO:0005102]; transcription coactivator activity [GO:0003713]; transcription coregulator activity [GO:0003712]; transcription coregulator binding [GO:0001221]	brahma complex [GO:0035060]; chromatin [GO:0000785]; cytoplasm [GO:0005737]; nBAF complex [GO:0071565]; npBAF complex [GO:0071564]; nucleoplasm [GO:0005654]; nucleus [GO:0005634]; SWI/SNF complex [GO:0016514]	GO:0000785; GO:0001221; GO:0002052; GO:0003139; GO:0003219; GO:0003407; GO:0003712; GO:0003713; GO:0005102; GO:0005634; GO:0005654; GO:0005737; GO:0006337; GO:0006338; GO:0006357; GO:0007399; GO:0016514; GO:0016922; GO:0030071; GO:0030374; GO:0035060; GO:0042692; GO:0043393; GO:0045582; GO:0045597; GO:0045663; GO:0045893; GO:0070316; GO:0071564; GO:0071565; GO:0140297; GO:2000045; GO:2000781; GO:…	14.9762	15.0041	15.0631	15.3725	15.081	15.5229	15.4417	15.314	15.5712	15.6222
PSMA4_P25789	-0.499242	-1.89185	-0.993889	0.132806	-0.733722	0.406337	0.964057	1.12937	0.465936	1.02019	PSMA4	Proteasome subunit alpha type-4	P25789	0.405667	0.00122982	0.0386345	-0.405667	sp|P25789|PSA4_HUMAN Proteasome subunit alpha type-4 OS=Homo sapiens OX=9606 GN=PSMA4 PE=1 SV=1	FUNCTION: Component of the 20S core proteasome complex involved in the proteolytic degradation of most intracellular proteins. This complex plays numerous essential roles within the cell by associating with different regulatory particles. Associated with two 19S regulatory particles, forms the 26S proteasome and thus participates in the ATP-dependent degradation of ubiquitinated proteins. The 26S…	SUBCELLULAR LOCATION: Cytoplasm {ECO:0000269|PubMed:12181345, ECO:0000269|PubMed:34711951}. Nucleus {ECO:0000269|PubMed:12181345, ECO:0000269|PubMed:34711951}. Note=Translocated from the cytoplasm into the nucleus following interaction with AKIRIN2, which bridges the proteasome with the nuclear import receptor IPO9 (PubMed:34711951). Colocalizes with TRIM5 in the cytoplasmic bodies (By similarity…		proteasomal protein catabolic process [GO:0010498]; proteasome-mediated ubiquitin-dependent protein catabolic process [GO:0043161]		cytoplasm [GO:0005737]; cytosol [GO:0005829]; extracellular exosome [GO:0070062]; intracellular membrane-bounded organelle [GO:0043231]; nucleoplasm [GO:0005654]; nucleus [GO:0005634]; P-body [GO:0000932]; proteasome complex [GO:0000502]; proteasome core complex [GO:0005839]; proteasome core complex, alpha-subunit complex [GO:0019773]	GO:0000502; GO:0000932; GO:0005634; GO:0005654; GO:0005737; GO:0005829; GO:0005839; GO:0010498; GO:0019773; GO:0043161; GO:0043231; GO:0070062	19.3256	18.9713	19.1998	19.4864	19.266	19.556	19.6979	19.74	19.5712	19.7122
TCF4_P15884	0.689913	1.66	0.390224	0.351426	0.91882	-0.025187	-1.24025	-1.52771	-0.47663	-0.740602	TCF4	Transcription factor 4;Transcription factor 12	P15884	0.384731	0.00123329	0.0386345	0.384731	sp|P15884|ITF2_HUMAN Transcription factor 4 OS=Homo sapiens OX=9606 GN=TCF4 PE=1 SV=3;sp|Q99081|HTF4_HUMAN Transcription factor 12 OS=Homo sapiens OX=9606 GN=TCF12 PE=1 SV=1	FUNCTION: Transcription factor that binds to the immunoglobulin enhancer Mu-E5/KE5-motif. Involved in the initiation of neuronal differentiation. Activates transcription by binding to the E box (5'-CANNTG-3'). Binds to the E-box present in the somatostatin receptor 2 initiator element (SSTR2-INR) to activate transcription (By similarity). Preferentially binds to either 5'-ACANNTGT-3' or 5'-CCANNT…	SUBCELLULAR LOCATION: Nucleus {ECO:0000255|PROSITE-ProRule:PRU00981, ECO:0000269|PubMed:22777675}.	DISEASE: Pitt-Hopkins syndrome (PTHS) [MIM:610954]: A syndrome characterized by intellectual disability, wide mouth and distinctive facial features, and intermittent hyperventilation followed by apnea. Features include intellectual disability with severe speech impairment, normal growth parameters at birth, postnatal microcephaly, breathing anomalies, severe motor developmental delay, motor incoo…	cell differentiation [GO:0030154]; nervous system development [GO:0007399]; positive regulation of neuron differentiation [GO:0045666]; positive regulation of transcription by RNA polymerase II [GO:0045944]; positive regulation of transcription, DNA-templated [GO:0045893]; protein-DNA complex assembly [GO:0065004]; regulation of transcription by RNA polymerase II [GO:0006357]	beta-catenin binding [GO:0008013]; DNA binding [GO:0003677]; DNA-binding transcription activator activity, RNA polymerase II-specific [GO:0001228]; DNA-binding transcription factor activity [GO:0003700]; DNA-binding transcription factor activity, RNA polymerase II-specific [GO:0000981]; E-box binding [GO:0070888]; identical protein binding [GO:0042802]; protein C-terminus binding [GO:0008022]; pr…	beta-catenin-TCF complex [GO:1990907]; beta-catenin-TCF7L2 complex [GO:0070369]; chromatin [GO:0000785]; nucleus [GO:0005634]; transcription regulator complex [GO:0005667]	GO:0000785; GO:0000978; GO:0000981; GO:0001093; GO:0001228; GO:0003677; GO:0003700; GO:0005634; GO:0005667; GO:0006357; GO:0007399; GO:0008013; GO:0008022; GO:0030154; GO:0042802; GO:0045666; GO:0045893; GO:0045944; GO:0046982; GO:0065004; GO:0070369; GO:0070888; GO:1990837; GO:1990907	13.767	13.9997	13.6952	13.6859	13.8219	13.5955	13.3041	13.2352	13.4873	13.424
SACM1L_Q9NTJ5	0.933564	1.25506	1.60174	-0.529293	0.694566	-0.660882	-0.850169	-0.885813	-0.597652	-0.961117	SACM1L	Phosphatidylinositide phosphatase SAC1	Q9NTJ5	0.433891	0.00124386	0.0386345	0.433891	sp|Q9NTJ5|SAC1_HUMAN Phosphatidylinositol-3-phosphatase SAC1 OS=Homo sapiens OX=9606 GN=SACM1L PE=1 SV=2	FUNCTION: Phosphoinositide phosphatase which catalyzes the hydrolysis of phosphatidylinositol 4-phosphate (PtdIns(4)P) (PubMed:24209621, PubMed:27044890, PubMed:29461204, PubMed:30659099). Can also catalyze the hydrolysis of phosphatidylinositol 3-phosphate (PtdIns(3)P) and has low activity towards phosphatidylinositol-3,5-bisphosphate (PtdIns(3,5)P2) (By similarity). Shows a very robust PtdIns(4…	SUBCELLULAR LOCATION: Endoplasmic reticulum membrane {ECO:0000269|PubMed:27044890, ECO:0000269|PubMed:29461204, ECO:0000269|PubMed:31806350}; Multi-pass membrane protein {ECO:0000255}. Golgi apparatus membrane {ECO:0000269|PubMed:29461204, ECO:0000269|PubMed:31806350}. Note=Trafficking between the ER and Golgi is regulated by nutrient status and by TMEM39A (PubMed:31806350). Localizes to endoplas…		phosphatidylinositol biosynthetic process [GO:0006661]; phosphatidylinositol dephosphorylation [GO:0046856]	phosphatase activity [GO:0016791]; phosphatidylinositol phosphate 4-phosphatase activity [GO:0034596]; phosphatidylinositol-3-phosphatase activity [GO:0004438]; phosphatidylinositol-4-phosphate phosphatase activity [GO:0043812]	endoplasmic reticulum [GO:0005783]; endoplasmic reticulum membrane [GO:0005789]; endoplasmic reticulum-plasma membrane contact site [GO:0140268]; Golgi apparatus [GO:0005794]; Golgi membrane [GO:0000139]; integral component of membrane [GO:0016021]	GO:0000139; GO:0004438; GO:0005783; GO:0005789; GO:0005794; GO:0006661; GO:0016021; GO:0016791; GO:0034596; GO:0043812; GO:0046856; GO:0140268	18.8492	18.9373	19.0324	18.448	18.7836	18.4119	18.36	18.3503	18.4293	18.3296
PCNP_Q8WW12	-1.06811	-0.503881	-1.55557	-0.340715	-0.529768	1.88466	0.552884	0.622542	0.241364	0.696596	PCNP	PEST proteolytic signal-containing nuclear protein	Q8WW12	0.391736	0.00125183	0.0386345	-0.391736	sp|Q8WW12|PCNP_HUMAN PEST proteolytic signal-containing nuclear protein OS=Homo sapiens OX=9606 GN=PCNP PE=1 SV=2	FUNCTION: May be involved in cell cycle regulation.	SUBCELLULAR LOCATION: Nucleus {ECO:0000269|PubMed:12176013}.		cell cycle [GO:0007049]; proteasome-mediated ubiquitin-dependent protein catabolic process [GO:0043161]; protein ubiquitination [GO:0016567]		nuclear body [GO:0016604]; nucleoplasm [GO:0005654]; nucleus [GO:0005634]	GO:0005634; GO:0005654; GO:0007049; GO:0016567; GO:0016604; GO:0043161	16.8089	16.9471	16.6895	16.9871	16.9408	17.5322	17.206	17.2231	17.1297	17.2412
ITGB2_P05107	-1.43534	-0.863587	-1.4454	0.495399	-0.652211	0.866942	0.425911	0.558678	0.814493	1.23512	ITGB2	Integrin beta-2	P05107	0.512292	0.00125424	0.0386345	-0.512292	sp|P05107|ITB2_HUMAN Integrin beta-2 OS=Homo sapiens OX=9606 GN=ITGB2 PE=1 SV=2	FUNCTION: Integrin ITGAL/ITGB2 is a receptor for ICAM1, ICAM2, ICAM3 and ICAM4. Integrin ITGAL/ITGB2 is also a receptor for the secreted form of ubiquitin-like protein ISG15; the interaction is mediated by ITGAL (PubMed:29100055). Integrins ITGAM/ITGB2 and ITGAX/ITGB2 are receptors for the iC3b fragment of the third complement component and for fibrinogen. Integrin ITGAX/ITGB2 recognizes the sequ…	SUBCELLULAR LOCATION: Cell membrane {ECO:0000269|PubMed:21193407, ECO:0000269|PubMed:28807980}; Single-pass type I membrane protein {ECO:0000305}. Membrane raft {ECO:0000269|PubMed:21193407}; Single-pass type I membrane protein {ECO:0000305}.	DISEASE: Leukocyte adhesion deficiency 1 (LAD1) [MIM:116920]: LAD1 patients have recurrent bacterial infections and their leukocytes are deficient in a wide range of adhesion-dependent functions. {ECO:0000269|PubMed:1346613, ECO:0000269|PubMed:1347532, ECO:0000269|PubMed:1352501, ECO:0000269|PubMed:1590804, ECO:0000269|PubMed:1694220, ECO:0000269|PubMed:1968911, ECO:0000269|PubMed:20529581, ECO:0…	amyloid-beta clearance [GO:0097242]; apoptotic process [GO:0006915]; cell adhesion [GO:0007155]; cell adhesion mediated by integrin [GO:0033627]; cell migration [GO:0016477]; cell-cell adhesion [GO:0098609]; cell-cell adhesion via plasma-membrane adhesion molecules [GO:0098742]; cell-cell signaling [GO:0007267]; cell-matrix adhesion [GO:0007160]; cellular response to low-density lipoprotein parti…	amyloid-beta binding [GO:0001540]; cell adhesion molecule binding [GO:0050839]; complement component C3b binding [GO:0001851]; heat shock protein binding [GO:0031072]; ICAM-3 receptor activity [GO:0030369]; integrin binding [GO:0005178]; metal ion binding [GO:0046872]; protein kinase binding [GO:0019901]	cell surface [GO:0009986]; external side of plasma membrane [GO:0009897]; extracellular exosome [GO:0070062]; extracellular vesicle [GO:1903561]; ficolin-1-rich granule membrane [GO:0101003]; focal adhesion [GO:0005925]; integrin alphaL-beta2 complex [GO:0034687]; integrin alphaM-beta2 complex [GO:0034688]; integrin alphaX-beta2 complex [GO:0034689]; integrin complex [GO:0008305]; membrane [GO:00…	GO:0001540; GO:0001774; GO:0001851; GO:0005178; GO:0005886; GO:0005925; GO:0006898; GO:0006911; GO:0006915; GO:0006954; GO:0007155; GO:0007159; GO:0007160; GO:0007229; GO:0007267; GO:0008305; GO:0008360; GO:0009897; GO:0009986; GO:0016020; GO:0016477; GO:0019901; GO:0030369; GO:0030593; GO:0031072; GO:0031623; GO:0032930; GO:0033627; GO:0034113; GO:0034687; GO:0034688; GO:0034689; GO:0035579; GO:…	12.9686	13.1563	12.9653	13.6025	13.2257	13.7244	13.5797	13.6232	13.7072	13.8453
SEMA3D_O95025	1.18831	0.54654	0.323206	-0.270136	2	-0.838136	-0.98448	-0.812506	-0.354175	-0.801603	SEMA3D	Semaphorin-3D	O95025	1.4644	0.00125527	0.0386345	1.4644	sp|O95025|SEM3D_HUMAN Semaphorin-3D OS=Homo sapiens OX=9606 GN=SEMA3D PE=2 SV=2	FUNCTION: Induces the collapse and paralysis of neuronal growth cones. Could potentially act as repulsive cues toward specific neuronal populations. Binds to neuropilin (By similarity). {ECO:0000250}.	SUBCELLULAR LOCATION: Secreted {ECO:0000250}.		axon guidance [GO:0007411]; negative chemotaxis [GO:0050919]; negative regulation of axon extension involved in axon guidance [GO:0048843]; neural crest cell migration [GO:0001755]; positive regulation of cell migration [GO:0030335]; semaphorin-plexin signaling pathway [GO:0071526]	chemorepellent activity [GO:0045499]; semaphorin receptor binding [GO:0030215]	extracellular space [GO:0005615]; integral component of plasma membrane [GO:0005887]	GO:0001755; GO:0005615; GO:0005887; GO:0007411; GO:0030215; GO:0030335; GO:0045499; GO:0048843; GO:0050919; GO:0071526	13.1699	12.5501	12.3345	11.7615	13.9567	11.2129	11.0716	11.2377	11.6803	11.2482
DPYSL3_Q14195	0.742788	0.91993	0.492681	-0.337593	2	-0.451878	-0.988637	-0.87408	-0.659325	-0.870507	DPYSL3	Dihydropyrimidinase-related protein 3	Q14195	0.684605	0.00125632	0.0386345	0.684605	sp|Q14195|DPYL3_HUMAN Dihydropyrimidinase-related protein 3 OS=Homo sapiens OX=9606 GN=DPYSL3 PE=1 SV=1	FUNCTION: Necessary for signaling by class 3 semaphorins and subsequent remodeling of the cytoskeleton. Plays a role in axon guidance, neuronal growth cone collapse and cell migration (By similarity). {ECO:0000250}.	SUBCELLULAR LOCATION: Cytoplasm {ECO:0000250}. Cell projection, growth cone {ECO:0000250}. Note=Colocalizes with synaptic vesicle protein 2 in the central region of the growth cone. {ECO:0000250}.		actin crosslink formation [GO:0051764]; actin filament bundle assembly [GO:0051017]; cellular response to cytokine stimulus [GO:0071345]; negative regulation of cell migration [GO:0030336]; negative regulation of neuron projection development [GO:0010977]; neuron development [GO:0048666]; positive regulation of filopodium assembly [GO:0051491]; positive regulation of neuron projection development…	chondroitin sulfate binding [GO:0035374]; filamin binding [GO:0031005]; hydrolase activity, acting on carbon-nitrogen (but not peptide) bonds [GO:0016810]; identical protein binding [GO:0042802]; SH3 domain binding [GO:0017124]	cell body [GO:0044297]; cytosol [GO:0005829]; exocytic vesicle [GO:0070382]; extracellular space [GO:0005615]; filamentous actin [GO:0031941]; growth cone [GO:0030426]; lamellipodium [GO:0030027]; synapse [GO:0045202]	GO:0005615; GO:0005829; GO:0010976; GO:0010977; GO:0016810; GO:0017124; GO:0030027; GO:0030336; GO:0030426; GO:0031005; GO:0031941; GO:0035374; GO:0042802; GO:0044297; GO:0045202; GO:0048666; GO:0048678; GO:0051017; GO:0051491; GO:0051764; GO:0070382; GO:0071345	19.034	19.1128	18.9226	18.553	19.6055	18.5021	18.2631	18.3141	18.4098	18.3157
XPC_Q01831	0.726287	1.51985	0.291331	0.220832	1.12612	-1.23033	-1.71299	-0.232594	-0.416015	-0.292491	XPC	DNA repair protein complementing XP-C cells	Q01831	0.542126	0.00127083	0.0386345	0.542126	sp|Q01831|XPC_HUMAN DNA repair protein complementing XP-C cells OS=Homo sapiens OX=9606 GN=XPC PE=1 SV=4	FUNCTION: Involved in global genome nucleotide excision repair (GG-NER) by acting as damage sensing and DNA-binding factor component of the XPC complex (PubMed:10734143, PubMed:19609301, PubMed:20649465, PubMed:9734359, PubMed:10873465, PubMed:12509299, PubMed:12547395, PubMed:19941824, PubMed:20028083, PubMed:20798892). Has only a low DNA repair activity by itself which is stimulated by RAD23B a…	SUBCELLULAR LOCATION: Nucleus {ECO:0000269|PubMed:11279143, ECO:0000269|PubMed:18682493, ECO:0000269|PubMed:8692695}. Chromosome {ECO:0000269|PubMed:29973595}. Cytoplasm {ECO:0000269|PubMed:18682493}. Note=Omnipresent in the nucleus and consistently associates with and dissociates from DNA in the absence of DNA damage (PubMed:18682493). Continuously shuttles between the cytoplasm and the nucleus,…	DISEASE: Xeroderma pigmentosum complementation group C (XP-C) [MIM:278720]: An autosomal recessive pigmentary skin disorder characterized by solar hypersensitivity of the skin, high predisposition for developing cancers on areas exposed to sunlight and, in some cases, neurological abnormalities. The skin develops marked freckling and other pigmentation abnormalities. {ECO:0000269|PubMed:10447254,…	DNA repair [GO:0006281]; mismatch repair [GO:0006298]; mitotic intra-S DNA damage checkpoint signaling [GO:0031573]; nucleotide-excision repair [GO:0006289]; positive regulation of transcription, DNA-templated [GO:0045893]; pyrimidine dimer repair by nucleotide-excision repair [GO:0000720]; regulation of mitotic cell cycle phase transition [GO:1901990]; response to auditory stimulus [GO:0010996];…	bubble DNA binding [GO:0000405]; damaged DNA binding [GO:0003684]; DNA damage sensor activity [GO:0140612]; heteroduplex DNA loop binding [GO:0000404]; protein-containing complex binding [GO:0044877]; single-stranded DNA binding [GO:0003697]; transcription coactivator activity [GO:0003713]	cytoplasm [GO:0005737]; cytosol [GO:0005829]; intracellular membrane-bounded organelle [GO:0043231]; mitochondrion [GO:0005739]; nucleolus [GO:0005730]; nucleoplasm [GO:0005654]; nucleotide-excision repair complex [GO:0000109]; nucleotide-excision repair factor 2 complex [GO:0000111]; nucleus [GO:0005634]; plasma membrane [GO:0005886]; site of DNA damage [GO:0090734]; XPC complex [GO:0071942]	GO:0000109; GO:0000111; GO:0000404; GO:0000405; GO:0000720; GO:0003684; GO:0003697; GO:0003713; GO:0005634; GO:0005654; GO:0005730; GO:0005737; GO:0005739; GO:0005829; GO:0005886; GO:0006281; GO:0006289; GO:0006298; GO:0009410; GO:0010224; GO:0010996; GO:0031573; GO:0043231; GO:0044877; GO:0045893; GO:0070914; GO:0071942; GO:0090734; GO:0140612; GO:1901990	14.546	14.8229	14.3942	14.3696	14.6855	13.8633	13.6949	14.2114	14.1474	14.1905
FARP1_Q9Y4F1	0.999756	0.449977	1.2725	-0.444088	1.56652	-0.667381	-0.46873	-0.61515	-0.664031	-1.42937	FARP1	FERM, RhoGEF and pleckstrin domain-containing protein 1	Q9Y4F1	0.6667	0.00127846	0.0386345	0.6667	sp|Q9Y4F1|FARP1_HUMAN FERM, ARHGEF and pleckstrin domain-containing protein 1 OS=Homo sapiens OX=9606 GN=FARP1 PE=1 SV=1	FUNCTION: Functions as guanine nucleotide exchange factor for RAC1. May play a role in semaphorin signaling. Plays a role in the assembly and disassembly of dendritic filopodia, the formation of dendritic spines, regulation of dendrite length and ultimately the formation of synapses (By similarity). {ECO:0000250}.	SUBCELLULAR LOCATION: Cell membrane; Peripheral membrane protein; Cytoplasmic side. Synapse. Synapse, synaptosome {ECO:0000250}. Cytoplasm, cytosol {ECO:0000250}. Cell projection, filopodium {ECO:0000250}. Cell projection, dendrite {ECO:0000250}. Cell projection, dendritic spine {ECO:0000250}. Note=Recruited to the cell membrane via interaction with CADM1. {ECO:0000250}.		dendrite morphogenesis [GO:0048813]; postsynaptic actin cytoskeleton organization [GO:0098974]; regulation of presynapse assembly [GO:1905606]; retrograde trans-synaptic signaling by trans-synaptic protein complex [GO:0098942]; synapse assembly [GO:0007416]	cytoskeletal protein binding [GO:0008092]; guanyl-nucleotide exchange factor activity [GO:0005085]; small GTPase binding [GO:0031267]	anchoring junction [GO:0070161]; cytoskeleton [GO:0005856]; cytosol [GO:0005829]; dendrite [GO:0030425]; dendritic spine [GO:0043197]; extrinsic component of cytoplasmic side of plasma membrane [GO:0031234]; extrinsic component of postsynaptic membrane [GO:0098890]; filopodium [GO:0030175]; glutamatergic synapse [GO:0098978]	GO:0005085; GO:0005829; GO:0005856; GO:0007416; GO:0008092; GO:0030175; GO:0030425; GO:0031234; GO:0031267; GO:0043197; GO:0048813; GO:0070161; GO:0098890; GO:0098942; GO:0098974; GO:0098978; GO:1905606	17.8462	17.6078	17.9644	17.2202	18.0919	17.1234	17.2095	17.1461	17.1249	16.7931
DCBLD2_Q96PD2	0.630033	0.739152	2	0.309215	0.105965	-0.851529	-1.0948	-0.655049	-0.969455	-0.344002	DCBLD2	Discoidin, CUB and LCCL domain-containing protein 2	Q96PD2	0.479062	0.00128487	0.0386345	0.479062	sp|Q96PD2|DCBD2_HUMAN Discoidin, CUB and LCCL domain-containing protein 2 OS=Homo sapiens OX=9606 GN=DCBLD2 PE=1 SV=1		SUBCELLULAR LOCATION: Membrane {ECO:0000269|PubMed:11973641}; Single-pass type I membrane protein {ECO:0000269|PubMed:11973641}.		intracellular receptor signaling pathway [GO:0030522]; negative regulation of cell growth [GO:0030308]; wound healing [GO:0042060]	signaling receptor activity [GO:0038023]	cell surface [GO:0009986]; integral component of plasma membrane [GO:0005887]	GO:0005887; GO:0009986; GO:0030308; GO:0030522; GO:0038023; GO:0042060	12.9325	12.9659	13.3916	12.8344	12.7722	12.4793	12.4049	12.5394	12.4432	12.6346
RIN2_Q8WYP3	0.686589	2	0.299313	-0.0430651	0.637231	-0.600584	-0.810127	-0.389932	-0.989493	-0.999771	RIN2	Ras and Rab interactor 2	Q8WYP3	1.28847	0.00128939	0.0386345	1.28847	sp|Q8WYP3|RIN2_HUMAN Ras and Rab interactor 2 OS=Homo sapiens OX=9606 GN=RIN2 PE=1 SV=1	FUNCTION: Ras effector protein. May function as an upstream activator and/or downstream effector for RAB5B in endocytic pathway. May function as a guanine nucleotide exchange (GEF) of RAB5B, required for activating the RAB5 proteins by exchanging bound GDP for free GTP. {ECO:0000269|PubMed:11733506}.	SUBCELLULAR LOCATION: Cytoplasm {ECO:0000305}.	DISEASE: MACS syndrome (MACS) [MIM:613075]: A complex disorder of elastic tissue characterized by sagging skin and occasionally by life-threatening visceral complications. {ECO:0000269|PubMed:19631308}. Note=The disease is caused by variants affecting the gene represented in this entry.	endocytosis [GO:0006897]; positive regulation of endothelial cell migration [GO:0010595]; positive regulation of endothelial cell-matrix adhesion via fibronectin [GO:1904906]; positive regulation of vasculogenesis [GO:2001214]; small GTPase mediated signal transduction [GO:0007264]	GTPase activator activity [GO:0005096]; GTPase regulator activity [GO:0030695]; guanyl-nucleotide exchange factor activity [GO:0005085]; small GTPase binding [GO:0031267]	cytosol [GO:0005829]; endocytic vesicle [GO:0030139]	GO:0005085; GO:0005096; GO:0005829; GO:0006897; GO:0007264; GO:0010595; GO:0030139; GO:0030695; GO:0031267; GO:1904906; GO:2001214	13.8754	15.1701	13.5462	13.2552	13.8334	12.7814	12.6033	12.9604	12.4508	12.4421
FABP5_Q01469	-0.655826	-1.79423	-1.00541	0.239631	-0.619597	0.753107	1.18919	0.0300558	0.631008	1.23208	FABP5	Fatty acid-binding protein, epidermal	Q01469	0.701666	0.00129132	0.0386345	-0.701666	sp|Q01469|FABP5_HUMAN Fatty acid-binding protein 5 OS=Homo sapiens OX=9606 GN=FABP5 PE=1 SV=3	FUNCTION: Intracellular carrier for long-chain fatty acids and related active lipids, such as endocannabinoids, that regulate the metabolism and actions of the ligands they bind. In addition to the cytosolic transport, selectively delivers specific fatty acids from the cytosol to the nucleus, wherein they activate nuclear receptors (PubMed:22170058, PubMed:21395585). Delivers retinoic acid to the…	SUBCELLULAR LOCATION: Cytoplasm {ECO:0000269|PubMed:24692551, ECO:0000269|PubMed:8092987}. Nucleus {ECO:0000269|PubMed:24692551}. Synapse {ECO:0000250|UniProtKB:Q05816}. Postsynaptic density {ECO:0000250|UniProtKB:Q05816}. Secreted {ECO:0000250|UniProtKB:Q05816}. Note=Localizes primarily to the cytoplasm. Upon certain ligand binding, a conformation change exposes a nuclear localization motif and …		epidermis development [GO:0008544]; fatty acid transport [GO:0015908]; glucose homeostasis [GO:0042593]; glucose metabolic process [GO:0006006]; lipid metabolic process [GO:0006629]; lipid transport across blood-brain barrier [GO:1990379]; long-chain fatty acid transport [GO:0015909]; negative regulation of glucose transmembrane transport [GO:0010829]; phosphatidylcholine biosynthetic process [GO…	fatty acid binding [GO:0005504]; identical protein binding [GO:0042802]; lipid binding [GO:0008289]; long-chain fatty acid transporter activity [GO:0005324]; retinoic acid binding [GO:0001972]	anchoring junction [GO:0070161]; azurophil granule lumen [GO:0035578]; cytoplasm [GO:0005737]; cytosol [GO:0005829]; extracellular exosome [GO:0070062]; extracellular region [GO:0005576]; nucleoplasm [GO:0005654]; nucleus [GO:0005634]; plasma membrane [GO:0005886]; postsynaptic density [GO:0014069]; secretory granule membrane [GO:0030667]; synapse [GO:0045202]	GO:0001972; GO:0005324; GO:0005504; GO:0005576; GO:0005634; GO:0005654; GO:0005737; GO:0005829; GO:0005886; GO:0006006; GO:0006629; GO:0006656; GO:0008289; GO:0008544; GO:0010829; GO:0014069; GO:0015908; GO:0015909; GO:0030667; GO:0031392; GO:0035360; GO:0035578; GO:0042593; GO:0042802; GO:0045202; GO:0051930; GO:0070062; GO:0070161; GO:0099178; GO:0120162; GO:1990379	20.1505	19.6299	19.9906	20.5601	20.1671	20.7949	20.9943	20.4642	20.7391	21.014
TXNRD1_Q16881	-0.770663	-1.15952	-1.28392	-0.161936	-0.599928	1.85043	0.160993	0.22024	0.812293	0.932014	TXNRD1	Thioredoxin reductase 1, cytoplasmic	Q16881	0.401556	0.00131054	0.0386345	-0.401556	sp|Q16881|TRXR1_HUMAN Thioredoxin reductase 1, cytoplasmic OS=Homo sapiens OX=9606 GN=TXNRD1 PE=1 SV=3	FUNCTION: Reduces disulfideprotein thioredoxin (Trx) to its dithiol-containing form (PubMed:8577704). Homodimeric flavoprotein involved in the regulation of cellular redox reactions, growth and differentiation. Contains a selenocysteine residue at the C-terminal active site that is essential for catalysis (Probable). Also has reductase activity on hydrogen peroxide (H2O2) (PubMed:10849437). {ECO:…	SUBCELLULAR LOCATION: [Isoform 1]: Cytoplasm {ECO:0000269|PubMed:18042542}.; SUBCELLULAR LOCATION: [Isoform 4]: Cytoplasm {ECO:0000269|PubMed:15199063}. Nucleus {ECO:0000269|PubMed:15199063}.; SUBCELLULAR LOCATION: [Isoform 5]: Cytoplasm {ECO:0000269|PubMed:15199063}.		cell population proliferation [GO:0008283]; cell redox homeostasis [GO:0045454]; mesoderm formation [GO:0001707]; signal transduction [GO:0007165]	FAD binding [GO:0071949]; glutathione oxidoreductase activity [GO:0097573]; identical protein binding [GO:0042802]; NADPH peroxidase activity [GO:0050137]; thioredoxin-disulfide reductase activity [GO:0004791]	cytosol [GO:0005829]; extracellular exosome [GO:0070062]; fibrillar center [GO:0001650]; mitochondrion [GO:0005739]; nucleoplasm [GO:0005654]	GO:0001650; GO:0001707; GO:0004791; GO:0005654; GO:0005739; GO:0005829; GO:0007165; GO:0008283; GO:0042802; GO:0045454; GO:0050137; GO:0070062; GO:0071949; GO:0097573	18.3756	18.2774	18.246	18.5293	18.4187	19.0374	18.6108	18.6258	18.7753	18.8055
MRVI1_Q9Y6F6	0.215766	1.53967	0.703521	0.0214169	1.3192	-0.763488	-1.77636	-0.469864	-0.589996	-0.199872	MRVI1	Protein MRVI1	Q9Y6F6	0.993214	0.00131122	0.0386345	0.993214	sp|Q9Y6F6|IRAG1_HUMAN Inositol 1,4,5-triphosphate receptor associated 1 OS=Homo sapiens OX=9606 GN=IRAG1 PE=1 SV=4	FUNCTION: Plays a role as NO/PRKG1-dependent regulator of IP3-induced calcium release; its phosphorylation by PRKG1 inhibits bradykinin and IP3-induced calcium release from intracellular stores. Recruits PRKG1 to the endoplasmic reticulum and may mediate the assembly of PRKG1 and ITPR1 in a macrocomplex. Involved in PRKG1 signaling cascade leading to inhibition of platelet activation and aggregat…	SUBCELLULAR LOCATION: Cytoplasm, perinuclear region. Sarcoplasmic reticulum {ECO:0000250}. Membrane {ECO:0000305}; Single-pass membrane protein {ECO:0000305}.		cGMP-mediated signaling [GO:0019934]		endoplasmic reticulum membrane [GO:0005789]; integral component of membrane [GO:0016021]; perinuclear region of cytoplasm [GO:0048471]; platelet dense tubular network membrane [GO:0031095]; sarcoplasmic reticulum [GO:0016529]	GO:0005789; GO:0016021; GO:0016529; GO:0019934; GO:0031095; GO:0048471	13.7184	14.5836	14.0372	13.5914	14.4395	13.0785	12.4166	13.2704	13.1919	13.4468
ARHGAP1_Q07960	1.2753	0.414387	1.15457	-0.2566	1.38841	-0.950586	-0.440435	-0.311664	-0.917012	-1.35636	ARHGAP1	Rho GTPase-activating protein 1	Q07960	0.40112	0.00131284	0.0386345	0.40112	sp|Q07960|RHG01_HUMAN Rho GTPase-activating protein 1 OS=Homo sapiens OX=9606 GN=ARHGAP1 PE=1 SV=1	FUNCTION: GTPase activator for the Rho, Rac and Cdc42 proteins, converting them to the putatively inactive GDP-bound state. Cdc42 seems to be the preferred substrate.	SUBCELLULAR LOCATION: Cytoplasm.		endosomal transport [GO:0016197]; negative regulation of endocytic recycling [GO:2001136]; regulation of small GTPase mediated signal transduction [GO:0051056]; Rho protein signal transduction [GO:0007266]; small GTPase mediated signal transduction [GO:0007264]; transferrin transport [GO:0033572]	cadherin binding [GO:0045296]; GTPase activator activity [GO:0005096]; SH3 domain binding [GO:0017124]; small GTPase binding [GO:0031267]	cytoplasm [GO:0005737]; cytosol [GO:0005829]; endosome membrane [GO:0010008]; extracellular exosome [GO:0070062]; perinuclear region of cytoplasm [GO:0048471]	GO:0005096; GO:0005737; GO:0005829; GO:0007264; GO:0007266; GO:0010008; GO:0016197; GO:0017124; GO:0031267; GO:0033572; GO:0045296; GO:0048471; GO:0051056; GO:0070062; GO:2001136	19.2314	19.0143	19.2009	18.845	19.2599	18.67	18.7987	18.8311	18.6785	18.5677
TNNI1_P19237	-1.64823	-1.07998	-1.29051	0.418377	-0.198177	0.815266	0.700407	0.381887	0.696158	1.2048	TNNI1	Troponin I, slow skeletal muscle	P19237	0.99529	0.00131726	0.0386345	-0.99529	sp|P19237|TNNI1_HUMAN Troponin I, slow skeletal muscle OS=Homo sapiens OX=9606 GN=TNNI1 PE=1 SV=3	FUNCTION: Troponin I is the inhibitory subunit of troponin, the thin filament regulatory complex which confers calcium-sensitivity to striated muscle actomyosin ATPase activity.			cardiac muscle contraction [GO:0060048]; muscle contraction [GO:0006936]; regulation of striated muscle contraction [GO:0006942]; skeletal muscle contraction [GO:0003009]; transition between fast and slow fiber [GO:0014883]; ventricular cardiac muscle tissue morphogenesis [GO:0055010]	actin binding [GO:0003779]; metal ion binding [GO:0046872]	cytosol [GO:0005829]; troponin complex [GO:0005861]	GO:0003009; GO:0003779; GO:0005829; GO:0005861; GO:0006936; GO:0006942; GO:0014883; GO:0046872; GO:0055010; GO:0060048	17.1696	17.5418	17.4039	18.5233	18.1194	18.7833	18.708	18.4994	18.7052	19.0384
TGFB1_P01137	1.33483	1.78915	0.386901	-0.417519	0.690989	-0.50078	-0.724726	-0.819653	-1.22698	-0.512209	TGFB1	Transforming growth factor beta-1;Latency-associated peptide	P01137	1.30425	0.00132298	0.0386345	1.30425	sp|P01137|TGFB1_HUMAN Transforming growth factor beta-1 proprotein OS=Homo sapiens OX=9606 GN=TGFB1 PE=1 SV=2	FUNCTION: Transforming growth factor beta-1 proprotein: Precursor of the Latency-associated peptide (LAP) and Transforming growth factor beta-1 (TGF-beta-1) chains, which constitute the regulatory and active subunit of TGF-beta-1, respectively. {ECO:0000269|PubMed:29109152, ECO:0000303|PubMed:27252363}.; FUNCTION: [Latency-associated peptide]: Required to maintain the Transforming growth factor b…	SUBCELLULAR LOCATION: [Latency-associated peptide]: Secreted, extracellular space, extracellular matrix {ECO:0000269|PubMed:17827158}.; SUBCELLULAR LOCATION: [Transforming growth factor beta-1]: Secreted {ECO:0000269|PubMed:17827158, ECO:0000269|PubMed:29483653}.	DISEASE: Camurati-Engelmann disease (CAEND) [MIM:131300]: An autosomal dominant disorder characterized by hyperostosis and sclerosis of the diaphyses of long bones. The disease typically presents in early childhood with pain, muscular weakness and waddling gait, and in some cases other features such as exophthalmos, facial paralysis, hearing difficulties and loss of vision. {ECO:0000269|PubMed:10…	aortic valve morphogenesis [GO:0003180]; ATP biosynthetic process [GO:0006754]; BMP signaling pathway [GO:0030509]; cell migration [GO:0016477]; cell-cell junction organization [GO:0045216]; cellular response to organic cyclic compound [GO:0071407]; cellular response to transforming growth factor beta stimulus [GO:0071560]; chondrocyte differentiation [GO:0002062]; common-partner SMAD protein pho…	antigen binding [GO:0003823]; cytokine activity [GO:0005125]; enzyme binding [GO:0019899]; growth factor activity [GO:0008083]; identical protein binding [GO:0042802]; type I transforming growth factor beta receptor binding [GO:0034713]; type II transforming growth factor beta receptor binding [GO:0005114]; type III transforming growth factor beta receptor binding [GO:0034714]	blood microparticle [GO:0072562]; cell surface [GO:0009986]; collagen-containing extracellular matrix [GO:0062023]; cytoplasm [GO:0005737]; extracellular matrix [GO:0031012]; extracellular region [GO:0005576]; extracellular space [GO:0005615]; Golgi lumen [GO:0005796]; nucleus [GO:0005634]; plasma membrane [GO:0005886]; platelet alpha granule lumen [GO:0031093]; transforming growth factor beta co…	GO:0000165; GO:0001570; GO:0001837; GO:0001843; GO:0001933; GO:0001934; GO:0002062; GO:0002244; GO:0002248; GO:0003179; GO:0003180; GO:0003823; GO:0005114; GO:0005125; GO:0005576; GO:0005615; GO:0005634; GO:0005737; GO:0005796; GO:0005886; GO:0006468; GO:0006611; GO:0006754; GO:0006796; GO:0006954; GO:0007173; GO:0007179; GO:0007182; GO:0007183; GO:0007435; GO:0007507; GO:0008083; GO:0008284; GO:…	12.7827	13.1742	11.966	11.2729	12.228	11.2012	11.0082	10.9264	10.5755	11.1913
TM7SF2_O76062	1.42175	0.844707	1.4027	0.039211	0.244399	-1.19638	-0.625524	-0.599971	-0.101406	-1.42948	TM7SF2	Delta(14)-sterol reductase	O76062	0.420976	0.00132816	0.0386345	0.420976	sp|O76062|ERG24_HUMAN Delta(14)-sterol reductase TM7SF2 OS=Homo sapiens OX=9606 GN=TM7SF2 PE=1 SV=3	FUNCTION: Catalyzes the reduction of the C14-unsaturated bond of lanosterol, as part of the metabolic pathway leading to cholesterol biosynthesis. {ECO:0000269|PubMed:16784888}.	SUBCELLULAR LOCATION: Microsome membrane {ECO:0000250|UniProtKB:Q71KT5}; Multi-pass membrane protein {ECO:0000255}. Endoplasmic reticulum membrane {ECO:0000269|PubMed:9878250}; Multi-pass membrane protein {ECO:0000255}.		cholesterol biosynthetic process [GO:0006695]; sterol biosynthetic process [GO:0016126]	delta14-sterol reductase activity [GO:0050613]; NADP binding [GO:0050661]; oxidoreductase activity, acting on the CH-CH group of donors [GO:0016627]	endoplasmic reticulum [GO:0005783]; endoplasmic reticulum membrane [GO:0005789]; integral component of endoplasmic reticulum membrane [GO:0030176]; integral component of plasma membrane [GO:0005887]; intracellular membrane-bounded organelle [GO:0043231]; nuclear inner membrane [GO:0005637]; receptor complex [GO:0043235]	GO:0005637; GO:0005783; GO:0005789; GO:0005887; GO:0006695; GO:0016126; GO:0016627; GO:0030176; GO:0043231; GO:0043235; GO:0050613; GO:0050661	17.5653	17.4117	17.5602	17.1972	17.2518	16.8682	17.0202	17.027	17.1597	16.8061
RDX_P35241	-1.00682	-1.73645	-1.07042	0.0215062	-0.21559	0.698563	0.601595	1.46362	0.700925	0.54308	RDX	Radixin	P35241	0.373541	0.00133165	0.0386345	-0.373541	sp|P35241|RADI_HUMAN Radixin OS=Homo sapiens OX=9606 GN=RDX PE=1 SV=1	FUNCTION: Probably plays a crucial role in the binding of the barbed end of actin filaments to the plasma membrane.	SUBCELLULAR LOCATION: Cell membrane; Peripheral membrane protein; Cytoplasmic side. Cytoplasm, cytoskeleton. Cleavage furrow. Cell projection, microvillus {ECO:0000250|UniProtKB:P26043}. Note=Highly concentrated in the undercoat of the cell-to-cell adherens junction and the cleavage furrow in the interphase and mitotic phase, respectively.	DISEASE: Deafness, autosomal recessive, 24 (DFNB24) [MIM:611022]: A form of non-syndromic sensorineural hearing loss. Sensorineural deafness results from damage to the neural receptors of the inner ear, the nerve pathways to the brain, or the area of the brain that receives sound information. {ECO:0000269|PubMed:17226784}. Note=The disease is caused by variants affecting the gene represented in t…	apical protein localization [GO:0045176]; barbed-end actin filament capping [GO:0051016]; cellular response to platelet-derived growth factor stimulus [GO:0036120]; cellular response to thyroid hormone stimulus [GO:0097067]; establishment of endothelial barrier [GO:0061028]; establishment of protein localization to plasma membrane [GO:0061951]; negative regulation of adherens junction organizatio…	actin binding [GO:0003779]; ATPase binding [GO:0051117]; cadherin binding [GO:0045296]; cell adhesion molecule binding [GO:0050839]; protein kinase A binding [GO:0051018]; RNA binding [GO:0003723]	adherens junction [GO:0005912]; apical part of cell [GO:0045177]; apical plasma membrane [GO:0016324]; cell periphery [GO:0071944]; cell tip [GO:0051286]; cleavage furrow [GO:0032154]; cortical actin cytoskeleton [GO:0030864]; extracellular exosome [GO:0070062]; extracellular space [GO:0005615]; filopodium [GO:0030175]; focal adhesion [GO:0005925]; lamellipodium [GO:0030027]; microvillus [GO:0005…	GO:0003723; GO:0003779; GO:0005615; GO:0005886; GO:0005902; GO:0005912; GO:0005925; GO:0008360; GO:0008361; GO:0010628; GO:0010737; GO:0016324; GO:0030027; GO:0030175; GO:0030315; GO:0030335; GO:0030496; GO:0030864; GO:0032154; GO:0032231; GO:0032487; GO:0034111; GO:0034260; GO:0036120; GO:0043087; GO:0045176; GO:0045177; GO:0045296; GO:0045732; GO:0045792; GO:0050839; GO:0051016; GO:0051018; GO:…	19.1645	18.9945	19.1497	19.4041	19.3489	19.5619	19.5393	19.7401	19.5624	19.5257
CCDC134_Q9H6E4	-1.00778	-0.81841	-0.316597	-1.3665	-0.874979	1.07737	0.158044	0.919751	0.933753	1.29534	CCDC134	Coiled-coil domain-containing protein 134	Q9H6E4	0.249897	0.00133315	0.0386345	-0.249897	sp|Q9H6E4|CC134_HUMAN Coiled-coil domain-containing protein 134 OS=Homo sapiens OX=9606 GN=CCDC134 PE=1 SV=1	FUNCTION: In extracellular secreted form, promotes proliferation and activation of CD8(+) T cells, suggesting a cytokine-like function (PubMed:25125657). Enhances cytotoxic anti-tumor activity of CD8(+) T cells (PubMed:25125657). May inhibit ERK and JNK signaling activity (PubMed:18087676, PubMed:23070808). May suppress cell migration and invasion activity, via its effects on ERK and JNK signalin…	SUBCELLULAR LOCATION: Nucleus {ECO:0000269|PubMed:22644376}. Cytoplasm {ECO:0000269|PubMed:22644376}. Secreted {ECO:0000269|PubMed:18087676}. Endoplasmic reticulum {ECO:0000269|PubMed:18087676}. Note=Accumulates in the nucleus in response to UV irradiation (PubMed:22644376). {ECO:0000269|PubMed:22644376}.		angiogenesis [GO:0001525]; embryonic hemopoiesis [GO:0035162]; embryonic liver development [GO:1990402]; placenta development [GO:0001890]; ventricular system development [GO:0021591]		endoplasmic reticulum [GO:0005783]; extracellular region [GO:0005576]; membrane [GO:0016020]; nucleus [GO:0005634]	GO:0001525; GO:0001890; GO:0005576; GO:0005634; GO:0005783; GO:0016020; GO:0021591; GO:0035162; GO:1990402	12.1822	12.2092	12.2807	12.1311	12.2011	12.4793	12.3483	12.4568	12.4588	12.5104
UBE2G1_P62253	-0.78747	-1.62159	-0.974501	0.14834	-0.640513	0.426197	1.54598	0.964709	0.930583	0.00826203	UBE2G1	Ubiquitin-conjugating enzyme E2 G1;Ubiquitin-conjugating enzyme E2 G1, N-terminally processed	P62253	0.5383	0.00133397	0.0386345	-0.5383	sp|P62253|UB2G1_HUMAN Ubiquitin-conjugating enzyme E2 G1 OS=Homo sapiens OX=9606 GN=UBE2G1 PE=1 SV=3	FUNCTION: Accepts ubiquitin from the E1 complex and catalyzes its covalent attachment to other proteins. In vitro catalyzes 'Lys-48'-, as well as 'Lys-63'-linked polyubiquitination. May be involved in degradation of muscle-specific proteins. Mediates polyubiquitination of CYP3A4. {ECO:0000269|PubMed:19103148, ECO:0000269|PubMed:20061386}.			proteasome-mediated ubiquitin-dependent protein catabolic process [GO:0043161]; protein K48-linked ubiquitination [GO:0070936]; protein K63-linked ubiquitination [GO:0070534]; protein polyubiquitination [GO:0000209]; ubiquitin-dependent protein catabolic process [GO:0006511]	ATP binding [GO:0005524]; ubiquitin conjugating enzyme activity [GO:0061631]; ubiquitin protein ligase binding [GO:0031625]; ubiquitin-protein transferase activity [GO:0004842]	cytosol [GO:0005829]; extracellular exosome [GO:0070062]	GO:0000209; GO:0004842; GO:0005524; GO:0005829; GO:0006511; GO:0031625; GO:0043161; GO:0061631; GO:0070062; GO:0070534; GO:0070936	15.9857	15.6961	15.9208	16.3107	16.0367	16.4071	16.7959	16.5941	16.5823	16.262
ENDOD1_O94919	1.20117	0.888253	0.524299	-0.0345919	1.25199	-1.14184	-1.48441	-0.833511	0.386019	-0.757373	ENDOD1	Endonuclease domain-containing 1 protein	O94919	0.684609	0.00134022	0.0386345	0.684609	sp|O94919|ENDD1_HUMAN Endonuclease domain-containing 1 protein OS=Homo sapiens OX=9606 GN=ENDOD1 PE=1 SV=2	FUNCTION: May act as a DNase and a RNase. Plays a role in the modulation of innate immune signaling through the cGAS-STING pathway by interacting with RNF26. {ECO:0000269|PubMed:32614325}.	SUBCELLULAR LOCATION: Secreted {ECO:0000305}.		innate immune response [GO:0045087]	endonuclease activity [GO:0004519]; metal ion binding [GO:0046872]; nucleic acid binding [GO:0003676]	cytosol [GO:0005829]; extracellular exosome [GO:0070062]; extracellular region [GO:0005576]; membrane [GO:0016020]	GO:0003676; GO:0004519; GO:0005576; GO:0005829; GO:0016020; GO:0045087; GO:0046872; GO:0070062	16.5704	16.4307	16.2681	16.0184	16.5932	15.5237	15.3707	15.6615	16.2063	15.6955
RPS15A_P62244	-1.55203	-0.909273	-0.219975	-0.665708	-0.59931	1.52098	1.11475	0.339264	-0.135173	1.10647	RPS15A	40S ribosomal protein S15a	P62244	0.424827	0.00134488	0.0386345	-0.424827	sp|P62244|RS15A_HUMAN 40S ribosomal protein S15a OS=Homo sapiens OX=9606 GN=RPS15A PE=1 SV=2	FUNCTION: Structural component of the ribosome (PubMed:23636399). Required for proper erythropoiesis (PubMed:27909223). {ECO:0000269|PubMed:23636399, ECO:0000269|PubMed:27909223}.		DISEASE: Diamond-Blackfan anemia 20 (DBA20) [MIM:618313]: A form of Diamond-Blackfan anemia, a congenital non-regenerative hypoplastic anemia that usually presents early in infancy. Diamond-Blackfan anemia is characterized by a moderate to severe macrocytic anemia, erythroblastopenia, and an increased risk of malignancy. 30 to 40% of Diamond-Blackfan anemia patients present with short stature and…	cytoplasmic translation [GO:0002181]; positive regulation of cell cycle [GO:0045787]; positive regulation of cell population proliferation [GO:0008284]; response to virus [GO:0009615]; translation [GO:0006412]	RNA binding [GO:0003723]; structural constituent of ribosome [GO:0003735]	cytoplasm [GO:0005737]; cytosol [GO:0005829]; cytosolic ribosome [GO:0022626]; cytosolic small ribosomal subunit [GO:0022627]; extracellular exosome [GO:0070062]; membrane [GO:0016020]; nucleoplasm [GO:0005654]	GO:0002181; GO:0003723; GO:0003735; GO:0005654; GO:0005737; GO:0005829; GO:0006412; GO:0008284; GO:0009615; GO:0016020; GO:0022626; GO:0022627; GO:0045787; GO:0070062	17.7012	17.8742	18.0597	17.9397	17.9576	18.5282	18.4189	18.2102	18.0825	18.4167
[truncated: 6,239 more rows]

## Sheet: (B) Phospho
	Normalized Log2 Intensity, Row Z Score														MYH7-WT															Normalized Log2 Intensity
FEATURE	H2923	H5362	H2929	H5219	H5179	C2867	C2884	C2879	C2880	C3045	GENE	PROTEIN	UNIPROT	MAXFC	P.VALUE	ADJ.P.VAL	LOGFC	FASTA_HEADERS	UNIPROT_FUNCTION	UNIPROT_CELLULAR_LOCATION	UNIPROT_DISEASE	GO_BIOLOGICAL_PROCESS	GO_MOLECULAR_FUNCTION	GO_CELLULAR_COMPONENT	GO_ID	PROTEINS	LOCALIZATION PROBABILITY	AMINO ACID	PEPTIDE SEQUENCE	H2923.1	H5362.1	H2929.1	H5219.1	H5179.1	C2867.1	C2884.1	C2879.1	C2880.1	C3045.1
[truncated: 9,697 more rows]
