# Supplementary material for: Multi-Omics Profiling of Hypertrophic Cardiomyopathy Reveals Altered Mechanisms in Mitochondrial Dynamics and Excitation–Contraction Coupling
Source: Int J Mol Sci. 2023 Mar 1;24(5):4724. doi: 10.3390/ijms24054724 (PMC10002553; doi:10.3390/ijms24054724)
Supplement: Supplementary file 1 [file ijms-24-04724-s001.zip › Supp_Table_S4.xlsx]

## Sheet: fgsea_Proteomics_MYH7_WT_Human_
Term	Description	p.Val	FDR	Phenotype	Genes	NES	ES	Gene_Hits	Gene_Total
ANATOMICAL STRUCTURE MORPHOGENESIS%GOBP%GO:0009653	ANATOMICAL STRUCTURE MORPHOGENESIS%GOBP%GO:0009653	0.000157456	0.0034844	1	JAM2,SYNPO2L,MCAM,ACTN1,DAG1,FBXW11,MFAP5,ITGB4,SDC2,COL22A1,EGFL7,TGFB2,COL12A1,S100A6,LAMB2,BICD1,EPHB4,ANO1,CTTN,FYN,COL4A1,COL4A2,SEMA3D,FARP1,TGFB1,PLXNA1,MBOAT7,LAMA5,COMP,RRAS,AGRN,TGFBI,HSPG2,PKD2,RECK,NOTCH2,SLC9A3R1,DBNL,ITGB3,ELN,PGM5,EMILIN1,CAV1,COL6A1,FLNA,PTGFRN,EPHA3,SEMA5B,IGF2,ITGB5,COL18A1,CDH11,RAB23,SPTBN1,ADAM17,COL8A1,ECE1,MFAP2,TAOK3,MYH11,CYFIP1,DOCK7,DCN,RILPL1,KALRN,TME…	2.01652	0.440964	207	491
NERVOUS SYSTEM DEVELOPMENT%GOBP%GO:0007399	NERVOUS SYSTEM DEVELOPMENT%GOBP%GO:0007399	0.000158103	0.0034844	1	DAG1,FBXW11,RTN4,SDC2,TGFB2,S100A6,DMD,HAPLN3,EPHB4,ANO1,MOG,CTTN,FYN,COL4A1,SEMA3D,FARP1,TGFB1,PLXNA1,MBOAT7,LAMA5,ALDH3A2,AGRN,BTBD1,HSPG2,PKD2,NOTCH2,DBNL,CRIM1,VCAN,RAB35,CDNF,HAPLN1,THOC2,EPHA3,MYEF2,SEMA5B,COL3A1,SPTBN1,FARP2,TAOK3,CYFIP1,DOCK7,MAP4,KALRN,NRP1,DBN1,GLUD1,DNAJC30,MARK1,CD9,NFASC,THY1,LAMA2,MYCBP2,PTN,NDE1,MAP2,SEMA3C,STX3,LUZP1,BTBD2,ARHGAP35,PHOX2B,TAOK1,RELN,MAP4K4,ROCK1,N…	1.64657	0.361829	145	459
CELL SURFACE RECEPTOR SIGNALING PATHWAY%GOBP%GO:0007166	CELL SURFACE RECEPTOR SIGNALING PATHWAY%GOBP%GO:0007166	0.000160333	0.0034844	1	IGF1R,PPBP,ITGB4,TGFB2,COLEC10,TNFSF12,EPHB4,MOG,COL16A1,ROR1,FYN,COL4A2,SEMA3D,TGFB1,PLXNA1,RFTN1,LAMA5,INHBE,PKD2,ABI1,NOTCH2,ITGA1,LTBP2,COL4A6,ITGB3,CAV1,FMOD,HBEGF,CDA,FLNA,MAGI1,EPHA3,DAAM1,DST,IL33,PF4,SEMA5B,IGF2,KIDINS220,ITGB5,CABIN1,COL3A1,ADAM17,RARRES2,FARP2,CAV2,PTPRA,SIRPB1,KALRN,NRP1,HOMER1,GNAI2,PDGFRB,ITGAV,THY1,BAD,PTN,SEMA3C,BCL2L2,SPG21,INSR,SAMD12,COL1A2,HOMER2,SMAD2,RELN,AC…	1.77326	0.391783	137	430
SIGNALING BY RHO GTPASES%REACTOME DATABASE ID RELEASE 81%194315	SIGNALING BY RHO GTPASES%REACTOME DATABASE ID RELEASE 81%194315	0.000161342	0.0034844	1	MCAM,ACTN1,CTTN,PDE5A,MYH10,FARP1,ARHGAP1,PLXNA1,ALDH3A2,STBD1,PLEKHG3,UACA,ABI1,WIPF3,FMNL3,CENPC,CAV1,FLNA,DAAM1,DST,KIDINS220,CENPA,SPTBN1,DOCK6,FARP2,LMNB1,TAOK3,MYH11,RRAS2,CYFIP1,ARHGEF12,DOCK7,GOLGA3,TMPO,FLOT2,KALRN,DBN1,CDC42BPB,NDE1,AKAP13,STAM,ZNF512B,VIM,SNAP23,ARHGAP35,TAOK1,NCOA2,GJA1,SHMT2,KLC4,ROCK1,CDC42EP1,MYLK,ITGB1,FAF2,BCAP31,FLOT1,CUL3,CDC42BPA,VAMP3,DIAPH2,HGS,ACTR3,MYO9B,F…	1.64791	0.368091	129	376
CELL DEVELOPMENT%GOBP%GO:0048468	CELL DEVELOPMENT%GOBP%GO:0048468	0.000161342	0.0034844	1	MYOF,JAM2,SYNPO2L,ACTN1,DAG1,FBXW11,RTN4,SDC2,COL22A1,TGFB2,S100A6,DMD,LAMB2,EPHB4,ANO1,TJP1,CTTN,TUBB8,FYN,SEMA3D,FARP1,PLXNA1,LAMA5,RAP2B,AGRN,NOTCH2,DBNL,ITGB3,PGM5,RAB35,CDNF,THOC2,FLNA,EPHA3,SEMA5B,COL18A1,DYSF,FARP2,CAV2,TAOK3,MYH11,CYFIP1,DOCK7,MAP4,RILPL1,KALRN,NRP1,DBN1,PDGFRB,ANKRD1,ITGAV,NFASC,THY1,LAMA2,MYCBP2,PTN,MAP2,SEMA3C,MYADM,STX3,RAP1B,CORO1C,ARHGAP35,PHOX2B,PEF1,TAOK1,RELN,ACT…	1.87889	0.417616	156	401
MEMBRANE ORGANIZATION%GOBP%GO:0061024	MEMBRANE ORGANIZATION%GOBP%GO:0061024	0.000161342	0.0034844	1	MYOF,RTN4,MUL1,SYNGR1,STX4,RFTN1,BET1,AGRN,SLC9A3R1,YIPF4,CAV1,TRAM1,SPIRE1,RAB34,TRDN,SLC25A6,OXA1L,SPTBN1,TMEM30A,DYSF,SNCA,LMNB1,CAV2,EXOC2,ATP9A,RAB8B,RILPL1,EMC1,COL5A1,TRAPPC3,CD9,VTI1A,BAD,YIPF5,SEC31A,MYADM,STAM,GHITM,STX3,IMMT,CORO1C,SNAP23,BNIP3L,SERPINA5,TMEM43,CHCHD6,PEF1,STX16,STX1A,TIMM22,ANXA2,CAMK2A,PDCD6,TOR1A,GSN,SNX18,SEC24B,FLOT1,EMC4,MYO18A,CUL3,TGFBRAP1,SEC22B,VAMP3,HGS,PLEK…	1.6033	0.357258	132	390
POSITIVE REGULATION OF CELLULAR COMPONENT ORGANIZATION%GOBP%GO:0051130	POSITIVE REGULATION OF CELLULAR COMPONENT ORGANIZATION%GOBP%GO:0051130	0.000161525	0.0034844	1	IGF1R,SYNPO2L,TNXB,DAG1,TGFB2,BICD1,MUL1,CTTN,COL16A1,ROR1,DPYSL3,TGFB1,PLXNA1,AGRN,RAB31,DBNL,EMILIN1,CAV1,MCU,SPIRE1,SRPX2,EPHA3,FCHSD2,IGF2,ATL3,KIDINS220,TMEM30A,SNCA,CYFIP1,DCN,NRP1,PHLDB2,DBN1,PHLDB1,PDGFRB,CAMK2B,HIP1,SMCR8,SS18L1,THY1,MAPRE2,BAD,PTN,GOLGA4,TPPP3,FSCN1,RAP1B,CORO1C,INSR,ARHGAP35,PIEZO1,RELN,MAP4K4,MECP2,ANXA2,CBL,ROCK1,NPTN,PTK7,TOR1A,GSN,AJUBA,PXN,HRG,CDC42EP1,PLXNB2,NES,…	1.62748	0.36234	106	394
SIGNALING BY RHO GTPASES, MIRO GTPASES AND RHOBTB3%REACTOME DATABASE ID RELEASE 81%9716542	SIGNALING BY RHO GTPASES, MIRO GTPASES AND RHOBTB3%REACTOME DATABASE ID RELEASE 81%9716542	0.000161551	0.0034844	1	MCAM,ACTN1,CTTN,PDE5A,MYH10,FARP1,ARHGAP1,PLXNA1,ALDH3A2,STBD1,PLEKHG3,UACA,ABI1,WIPF3,FMNL3,CENPC,CAV1,FLNA,DAAM1,DST,KIDINS220,CENPA,SPTBN1,DOCK6,FARP2,LMNB1,TAOK3,MYH11,RRAS2,CYFIP1,ARHGEF12,DOCK7,GOLGA3,TMPO,FLOT2,KALRN,DBN1,CDC42BPB,NDE1,AKAP13,STAM,ZNF512B,VIM,SNAP23,ARHGAP35,TAOK1,NCOA2,GJA1,SHMT2,KLC4,ROCK1,CDC42EP1,MYLK,ITGB1,FAF2,BCAP31,FLOT1,CUL3,CDC42BPA,VAMP3,DIAPH2,HGS,ACTR3,MYO9B,F…	1.61194	0.359653	129	385
TISSUE DEVELOPMENT%GOBP%GO:0009888	TISSUE DEVELOPMENT%GOBP%GO:0009888	0.000161996	0.0034844	1	DAG1,SGCG,ITGB4,COL22A1,TGFB2,COL12A1,DMD,LAMB2,TJP1,COL4A1,COL4A2,IRF6,SEMA3D,TGFB1,LAMA5,RAP2B,ALDH3A2,AGRN,HSPG2,PKD2,NOTCH2,SLC9A3R1,SGCD,ITGB3,PGM5,SVIL,CAV1,COL6A1,FLNA,OGN,SEMA5B,CLEC3B,ITGB5,COL18A1,ADAM17,ASPN,COL8A1,CAV2,MYL6B,MYH11,FLOT2,RILPL1,NRP1,PDGFRB,COL5A1,ANKRD1,ITGAV,LOXL2,LAMA2,PTN,ANXA7,ENPP1,SEMA3C,AKAP13,TPPP3,MYADM,MGP,RAP1B,LUZP1,MICAL2,CORO1C,ARHGAP35,PHOX2B,PEF1,SMAD2,…	1.74968	0.393134	126	353
POSITIVE REGULATION OF DEVELOPMENTAL PROCESS%GOBP%GO:0051094	POSITIVE REGULATION OF DEVELOPMENTAL PROCESS%GOBP%GO:0051094	0.000162338	0.0034844	1	TGM2,TNXB,DAG1,RTN4,TGFB2,TNFSF12,LAMB2,TJP1,MUL1,CD46,TCF4,RIN2,TGFB1,PLXNA1,AGO2,RRAS,IGFBP3,AGRN,DBNL,GLIPR2,MCU,TRPM4,FLNA,SPIRE1,SRPX2,PF4,RARRES2,DCN,TMEM119,NRP1,MTOR,PHLDB2,DBN1,PHLDB1,CAMK2B,LOXL2,SS18L1,LAMA2,BAD,PTN,GOLGA4,LTBP3,SERPINE2,MYADM,PTGIS,CD74,CORO1C,INSR,ECM1,PIEZO1,SMAD2,RELN,NCOA2,GJA1,DMTN,HLA-DRB1,COL1A1,NPTN,PDCD6,STAT5B,PLXNB2,ITGB1,FMR1,FLOT1,TGFB3,FBN2,ATP2B1,PROM1,…	1.62831	0.366053	114	351
REGULATION OF LOCOMOTION%GOBP%GO:0040012	REGULATION OF LOCOMOTION%GOBP%GO:0040012	0.000162522	0.0034844	1	JAM2,IGF1R,DAG1,RTN4,IGFBP5,THBS4,TGFB2,TJP1,STX4,SEMA3D,DPYSL3,RIN2,TGFB1,PLXNA1,RAP2B,AGO2,RRAS,IGFBP3,PLEKHG3,RECK,ITGB3,GLIPR2,EMILIN1,CAV1,MCU,HBEGF,FLNA,SRPX2,ATP2B4,SEMA5B,COL3A1,CDH11,ADAM17,RARRES2,DOCK7,DCN,NRP1,MTOR,PHLDB2,FAM89B,JAM3,PDGFRB,CAMK2B,THY1,MAPRE2,MYCBP2,PTN,IGSF10,PODN,SERPINE2,SEMA3C,MYADM,STX3,CD74,CORO1C,INSR,ACE,RELN,ACTN4,GJA1,MAP4K4,DMTN,MYO1C,MECP2,COL1A1,ROCK1,FRM…	1.65992	0.373642	120	345
REGULATION OF CELL MIGRATION%GOBP%GO:0030334	REGULATION OF CELL MIGRATION%GOBP%GO:0030334	0.000163185	0.0034844	1	JAM2,IGF1R,DAG1,RTN4,IGFBP5,THBS4,TGFB2,TJP1,STX4,SEMA3D,DPYSL3,RIN2,TGFB1,PLXNA1,RAP2B,AGO2,RRAS,IGFBP3,PLEKHG3,RECK,ITGB3,GLIPR2,EMILIN1,CAV1,MCU,HBEGF,FLNA,SRPX2,ATP2B4,SEMA5B,COL3A1,CDH11,ADAM17,RARRES2,DOCK7,DCN,NRP1,MTOR,PHLDB2,FAM89B,JAM3,PDGFRB,CAMK2B,THY1,MAPRE2,PTN,IGSF10,PODN,SERPINE2,SEMA3C,MYADM,CD74,CORO1C,INSR,ACE,RELN,ACTN4,GJA1,MAP4K4,DMTN,MYO1C,MECP2,COL1A1,ROCK1,FRMD5,CAMK2A,PD…	1.72369	0.390402	114	319
ACTIN FILAMENT-BASED PROCESS%GOBP%GO:0030029	ACTIN FILAMENT-BASED PROCESS%GOBP%GO:0030029	0.000163185	0.0034844	1	SPTA1,SYNPO2L,ARFGEF3,ACTN1,TNXB,MYO1D,DMD,MYO18B,TJP1,CTTN,MYH10,DPYSL3,CACNA2D1,UTRN,ABI1,DBNL,WIPF3,FMNL3,PGM5,SVIL,MCU,STRIP1,FLNA,SPIRE1,FHL3,EPB41L1,ITGB5,SPTBN1,FARP2,PLS3,MYL6B,MYH11,NRP1,CALD1,PDLIM7,PDLIM4,DBN1,PDGFRB,ANKRD1,HIP1,CDC42BPB,FSCN1,MICAL2,CORO1C,ARHGAP35,PDLIM1,LIMA1,ACTN4,GJA1,DMTN,MYO1C,SHROOM3,ROCK1,FRMD5,PTK7,GSN,CSRP1,S1PR1,SPECC1,LLGL1,ITGB1,ENAH,LMOD2,MYO18A,CUL3,CDC…	1.90746	0.432024	131	319
REGULATION OF CELL MOTILITY%GOBP%GO:2000145	REGULATION OF CELL MOTILITY%GOBP%GO:2000145	0.000163292	0.0034844	1	JAM2,IGF1R,DAG1,RTN4,IGFBP5,THBS4,TGFB2,TJP1,STX4,SEMA3D,DPYSL3,RIN2,TGFB1,PLXNA1,RAP2B,AGO2,RRAS,IGFBP3,PLEKHG3,RECK,ITGB3,GLIPR2,EMILIN1,CAV1,MCU,HBEGF,FLNA,SRPX2,ATP2B4,SEMA5B,COL3A1,CDH11,ADAM17,RARRES2,DOCK7,DCN,NRP1,MTOR,PHLDB2,FAM89B,JAM3,PDGFRB,CAMK2B,THY1,MAPRE2,PTN,IGSF10,PODN,SERPINE2,SEMA3C,MYADM,CD74,CORO1C,INSR,ACE,RELN,ACTN4,GJA1,MAP4K4,DMTN,MYO1C,MECP2,COL1A1,ROCK1,FRMD5,CAMK2A,PD…	1.68569	0.380548	117	334
HEMOSTASIS%REACTOME DATABASE ID RELEASE 81%109582	HEMOSTASIS%REACTOME DATABASE ID RELEASE 81%109582	0.000163693	0.0034844	1	JAM2,HBD,PPBP,HBB,ACTN1,ATP2A3,SDC2,TGFB2,PDE5A,FYN,STX4,GNA14,TGFB1,ENDOD1,ISLR,ITGA1,ITGB3,CAV1,FLNA,ITPR1,ATP2B4,RBSN,PF4,KLKB1,IGF2,CLEC3B,GNAI1,DOCK6,RARRES2,ESAM,F11,DOCK7,TEX264,GNAI2,JAM3,SERPIND1,F13B,ITGAV,CD9,SERPINE2,RAP1B,CD74,GNA11,CFD,ECM1,SERPINA5,SERPINA4,HBG1,TLN1,SPP2,ACTN4,ANXA2,KLC4,CD44,EHD3,HRG,GNAS,ITGB1,GLG1,VPS45,ABHD12,CHID1,CEACAM8,TGFB3,MMRN1,ATP2B1,KIFAP3,GNAQ,PTPN11…	1.60305	0.363997	114	311
CELL PROJECTION ORGANIZATION%GOBP%GO:0030030	CELL PROJECTION ORGANIZATION%GOBP%GO:0030030	0.000163693	0.0034844	1	IGF1R,DAG1,RTN4,SDC2,S100A6,EPHB4,ANO1,CTTN,FYN,SEMA3D,FARP1,PLXNA1,LAMA5,RAP2B,PKD2,NOTCH2,SLC9A3R1,DBNL,RAB35,CDNF,FLNA,ABLIM2,EPHA3,SEMA5B,PIBF1,RAB23,TAOK3,CYFIP1,DOCK7,RAB8B,MAP4,RILPL1,KALRN,NRP1,DBN1,NFASC,LAMA2,MYCBP2,PTN,MAP2,SEMA3C,FSCN1,STX3,RAP1B,INSR,ARHGAP35,PHOX2B,TAOK1,RELN,LIMA1,MAP4K4,DMTN,ROCK1,NPTN,EHD3,CAMK2A,LAMA3,TOR1A,GSN,S1PR1,PLXNB2,MYLK,LLGL1,ITGB1,PTPN23,ENAH,STMN1,RAB…	1.85016	0.42103	116	303
REGULATION OF MULTICELLULAR ORGANISMAL DEVELOPMENT%GOBP%GO:2000026	REGULATION OF MULTICELLULAR ORGANISMAL DEVELOPMENT%GOBP%GO:2000026	0.00016372	0.0034844	1	JAM2,TGM2,DAG1,RTN4,THBS4,TGFB2,TNFSF12,TJP1,CD46,COL4A2,SEMA3D,TGFB1,PLXNA1,AGO2,RRAS,AGRN,HSPG2,THBS2,DBNL,IL17D,EMILIN1,CAV1,TRPM4,SRPX2,ATP2B4,PF4,SEMA5B,ASPN,DOCK7,DCN,TMEM119,NRP1,MTOR,PHLDB2,DBN1,PHLDB1,CAMK2B,LOXL2,SS18L1,THY1,BAD,PTN,GOLGA4,MAP2,ENPP1,SERPINE2,SEMA3C,PTGIS,CD74,INSR,ECM1,LRRC17,RELN,MECP2,HLA-DRB1,ROCK1,NPTN,PDCD6,STAT5B,HRG,S1PR1,PLXNB2,ITGB1,TGFB3,FBN2,ATP2B1,PROM1,AGO…	1.69147	0.382767	103	325
PLASMA MEMBRANE BOUNDED CELL PROJECTION ORGANIZATION%GOBP%GO:0120036	PLASMA MEMBRANE BOUNDED CELL PROJECTION ORGANIZATION%GOBP%GO:0120036	0.000164015	0.0034844	1	IGF1R,DAG1,RTN4,SDC2,S100A6,EPHB4,CTTN,FYN,SEMA3D,FARP1,PLXNA1,LAMA5,RAP2B,PKD2,NOTCH2,SLC9A3R1,DBNL,RAB35,CDNF,FLNA,ABLIM2,EPHA3,SEMA5B,PIBF1,RAB23,TAOK3,CYFIP1,DOCK7,RAB8B,MAP4,RILPL1,KALRN,NRP1,DBN1,NFASC,LAMA2,MYCBP2,PTN,MAP2,SEMA3C,FSCN1,STX3,RAP1B,INSR,ARHGAP35,PHOX2B,TAOK1,RELN,LIMA1,MAP4K4,DMTN,ROCK1,NPTN,EHD3,CAMK2A,LAMA3,TOR1A,GSN,S1PR1,PLXNB2,MYLK,LLGL1,ITGB1,PTPN23,ENAH,STMN1,RAB10,KI…	1.83367	0.417816	115	300
NEUROGENESIS%GOBP%GO:0022008	NEUROGENESIS%GOBP%GO:0022008	0.000164231	0.0034844	1	DAG1,RTN4,SDC2,TGFB2,S100A6,DMD,EPHB4,ANO1,CTTN,FYN,SEMA3D,FARP1,PLXNA1,MBOAT7,LAMA5,AGRN,BTBD1,NOTCH2,DBNL,RAB35,CDNF,THOC2,EPHA3,MYEF2,SEMA5B,FARP2,TAOK3,CYFIP1,DOCK7,MAP4,KALRN,NRP1,DBN1,MARK1,CD9,NFASC,THY1,LAMA2,MYCBP2,PTN,MAP2,SEMA3C,STX3,BTBD2,ARHGAP35,PHOX2B,TAOK1,RELN,MAP4K4,ROCK1,NPTN,CAMK2A,LAMA3,TOR1A,PLXNB2,LLGL1,ENAH,STMN1,NRBP2,PROM1,RAB10,RTN3,EIF2B5,WNT9B,CAMSAP1,SPG11,PSEN1,APP,…	1.7892	0.408983	114	288
REGULATION OF ANATOMICAL STRUCTURE MORPHOGENESIS%GOBP%GO:0022603	REGULATION OF ANATOMICAL STRUCTURE MORPHOGENESIS%GOBP%GO:0022603	0.000164772	0.0034844	1	DAG1,RTN4,SDC2,THBS4,TGFB2,TNFSF12,TJP1,MUL1,FYN,MYH10,COL4A2,SEMA3D,TGFB1,PLXNA1,AGO2,RRAS,HSPG2,SH3D19,SLC9A3R1,THBS2,DBNL,FMNL3,EMILIN1,MCU,STRIP1,FLNA,SPIRE1,ATP2B4,DAAM1,PF4,SEMA5B,DCN,NRP1,PHLDB2,DBN1,PHLDB1,CAMK2B,SS18L1,THY1,GOLGA4,MAP2,SEMA3C,MYADM,PTGIS,CORO1C,ARHGAP35,ECM1,RELN,ACTN4,GJA1,DMTN,MECP2,ROCK1,CD44,PDCD6,HRG,CDC42EP1,PLXNB2,ITGB1,AGO1,HGS,RALBP1,LIMS1,CAMSAP1,VAT1,CORO1B,RH…	1.95213	0.44654	103	287
ACTIN CYTOSKELETON ORGANIZATION%GOBP%GO:0030036	ACTIN CYTOSKELETON ORGANIZATION%GOBP%GO:0030036	0.000165235	0.0034844	1	SPTA1,SYNPO2L,ARFGEF3,ACTN1,TNXB,MYO1D,DMD,MYO18B,TJP1,CTTN,MYH10,DPYSL3,UTRN,ABI1,DBNL,FMNL3,PGM5,SVIL,MCU,STRIP1,FLNA,SPIRE1,FHL3,EPB41L1,ITGB5,SPTBN1,FARP2,PLS3,MYH11,NRP1,CALD1,PDLIM7,PDLIM4,DBN1,PDGFRB,ANKRD1,HIP1,CDC42BPB,FSCN1,MICAL2,CORO1C,ARHGAP35,PDLIM1,LIMA1,ACTN4,DMTN,MYO1C,SHROOM3,ROCK1,FRMD5,PTK7,GSN,CSRP1,S1PR1,SPECC1,LLGL1,ITGB1,ENAH,LMOD2,MYO18A,CUL3,CDC42BPA,DIAPH2,ACTR3,MPRIP,S…	2.02819	0.464404	123	286
GENERATION OF NEURONS%GOBP%GO:0048699	GENERATION OF NEURONS%GOBP%GO:0048699	0.000165399	0.0034844	1	DAG1,RTN4,SDC2,TGFB2,S100A6,DMD,EPHB4,CTTN,FYN,SEMA3D,FARP1,PLXNA1,LAMA5,AGRN,NOTCH2,DBNL,RAB35,CDNF,THOC2,EPHA3,MYEF2,SEMA5B,FARP2,TAOK3,CYFIP1,DOCK7,MAP4,KALRN,NRP1,DBN1,MARK1,NFASC,THY1,LAMA2,MYCBP2,PTN,MAP2,SEMA3C,STX3,ARHGAP35,PHOX2B,TAOK1,RELN,MAP4K4,ROCK1,NPTN,CAMK2A,LAMA3,TOR1A,PLXNB2,LLGL1,ENAH,STMN1,NRBP2,PROM1,RAB10,RTN3,WNT9B,CAMSAP1,SPG11,APP,PLXNA2,ERCC2,APOE,DAB2IP,ACTB,METTL14,MAP…	1.78487	0.411883	106	261
RHO GTPASE CYCLE%REACTOME DATABASE ID RELEASE 81%9012999	RHO GTPASE CYCLE%REACTOME DATABASE ID RELEASE 81%9012999	0.000165426	0.0034844	1	MCAM,ACTN1,PDE5A,FARP1,ARHGAP1,PLXNA1,ALDH3A2,STBD1,PLEKHG3,UACA,ABI1,WIPF3,FMNL3,CAV1,DAAM1,DST,KIDINS220,SPTBN1,DOCK6,FARP2,LMNB1,TAOK3,RRAS2,CYFIP1,ARHGEF12,DOCK7,GOLGA3,TMPO,FLOT2,KALRN,DBN1,CDC42BPB,AKAP13,STAM,ZNF512B,VIM,SNAP23,ARHGAP35,GJA1,SHMT2,ROCK1,CDC42EP1,ITGB1,FAF2,BCAP31,FLOT1,CUL3,CDC42BPA,VAMP3,DIAPH2,HGS,MYO9B,FILIP1,RALBP1,SCRIB,SWAP70,ARHGEF40,RHOA,SPTAN1,ACTB,RAPGEF1,ARMCX3,…	1.74906	0.401998	101	275
CELL MOTILITY%GOBP%GO:0048870	CELL MOTILITY%GOBP%GO:0048870	0.000165426	0.0034844	1	JAM2,PPBP,RTN4,ITGB4,SDC2,THBS4,TGFB2,TNFSF12,LAMB2,RHBDF1,EPHB4,CTTN,FYN,SEMA3D,TGFB1,MBOAT7,LAMA5,FMNL3,ITGB3,EMILIN1,TRPM4,HBEGF,FLNA,SRPX2,ATP2B4,EPHA3,DST,PF4,SEMA5B,SLC9A1,ITGB5,ADAM17,FAP,NRP1,JAM3,PDGFRB,COL5A1,ITGAV,LOXL2,CDC42BPB,MARK1,CD9,PTN,NDE1,SEMA3C,FSCN1,CORO1C,ARHGAP35,PHOX2B,PDLIM1,RELN,LIMA1,ROCK1,CD44,PTK7,LAMA3,TOR1A,PXN,S1PR1,ITGA9,ITGB1,ITGA7,ITGA11,ENAH,MYO18A,CUL3,CDC42B…	1.89159	0.434756	108	275
CELL MIGRATION%GOBP%GO:0016477	CELL MIGRATION%GOBP%GO:0016477	0.000165782	0.0034844	1	JAM2,PPBP,RTN4,ITGB4,SDC2,THBS4,TGFB2,TNFSF12,LAMB2,RHBDF1,EPHB4,FYN,SEMA3D,TGFB1,MBOAT7,LAMA5,FMNL3,ITGB3,EMILIN1,TRPM4,HBEGF,FLNA,EPHA3,PF4,SEMA5B,SLC9A1,ITGB5,ADAM17,FAP,NRP1,JAM3,PDGFRB,COL5A1,ITGAV,LOXL2,CDC42BPB,MARK1,CD9,PTN,NDE1,SEMA3C,FSCN1,CORO1C,ARHGAP35,PHOX2B,PDLIM1,RELN,LIMA1,ROCK1,CD44,PTK7,LAMA3,TOR1A,PXN,S1PR1,ITGA9,ITGB1,ITGA7,ITGA11,MYO18A,CUL3,CDC42BPA,ANXA6,SCRIB,PIK3C2B,PIP5…	1.84573	0.426719	100	257
REGULATION OF CELL ADHESION%GOBP%GO:0030155	REGULATION OF CELL ADHESION%GOBP%GO:0030155	0.00016581	0.0034844	1	CD55,TGM2,TNXB,TGFB2,LAMB2,ILDR2,TJP1,COL16A1,FYN,STX4,CD46,CASK,RIN2,TGFB1,PLXNA1,RRAS,TGFBI,UTRN,ABI3BP,CAV1,FLNA,MAGI1,EPHA3,IGF2,SLC9A1,PTPRA,FLOT2,SIRPB1,NRP1,PHLDB2,JAM3,ITGAV,CD9,THY1,LAMA2,SERPINE2,MYADM,STX3,CORO1C,PIEZO1,TLN1,ACTN4,MAP4K4,DMTN,HLA-DRB1,ROCK1,FRMD5,CD44,MBP,HRG,PLXNB2,PTPN23,FLOT1,MMRN1,HLA-DPA1,DAPK3,LIMS1,SCRIB,NID1,PTPN11,NPNT,VCL,RHOA,PLXNA2,PTPN2,TRIOBP,GPNMB,FBLN2,…	1.70038	0.393829	96	253
SUPRAMOLECULAR FIBER ORGANIZATION%GOBP%GO:0097435	SUPRAMOLECULAR FIBER ORGANIZATION%GOBP%GO:0097435	0.000165975	0.0034844	1	SPTA1,SYNPO2L,ACTN1,TNXB,MYO1D,TGFB2,COL12A1,DPYSL3,ABI1,LTBP2,PGM5,EMILIN1,SVIL,MCU,FLNA,SPIRE1,DPT,TRDN,DST,ITGB5,COL3A1,PLS3,SNCA,LUM,MYH11,LOXL1,CALD1,DBN1,PDGFRB,COL5A1,ANKRD1,HIP1,LOXL2,COL14A1,NDE1,LTBP3,FSCN1,CLIP2,TUBGCP6,MFAP4,VIM,MICAL2,CORO1C,COL1A2,PDLIM1,LIMA1,DMTN,MYO1C,SHROOM3,COL1A1,GSN,CSRP1,ITGB1,COLGALT1,ENAH,LMOD2,STMN1,CUL3,PXDN,DIAPH2,ACTR3,MPRIP,CAMSAP1,CORO1B,AKAP9,APP,MA…	1.99942	0.462017	113	258
CELL ADHESION%GOBP%GO:0007155	CELL ADHESION%GOBP%GO:0007155	0.000166279	0.0034844	1	JAM2,HBB,ENTPD1,ACTN1,TNXB,POSTN,ITGB4,THBS4,AOC3,TGFB2,LAMB2,IGFBP7,EPHB4,TJP1,CTTN,COL16A1,SGCE,CASK,LAMA5,RAP2B,TGFBI,ISLR,ITGA1,ITGB3,EMILIN1,BCAM,FLNA,MAGI1,SRPX2,ITGB5,COL3A1,DLG3,CDH11,ADAM17,FARP2,ESAM,NID2,NRP1,JAM3,COL5A1,NT5E,ITGAV,LOXL2,CD9,NFASC,THY1,COL14A1,SSPN,APOA4,TLN1,ARVCF,PCDHGC3,AMBP,ROCK1,NPTN,CD44,PTK7,LAMA3,TOR1A,PXN,CSRP1,S1PR1,ITGA9,PLXNB2,GNAS,ITGB1,THBS3,ITGA7,CEACAM8…	2.16003	0.501112	122	250
NEURON DIFFERENTIATION%GOBP%GO:0030182	NEURON DIFFERENTIATION%GOBP%GO:0030182	0.000166806	0.0034844	1	DAG1,RTN4,SDC2,TGFB2,S100A6,DMD,EPHB4,CTTN,FYN,SEMA3D,FARP1,PLXNA1,LAMA5,AGRN,NOTCH2,DBNL,RAB35,CDNF,THOC2,EPHA3,MYEF2,SEMA5B,FARP2,TAOK3,CYFIP1,DOCK7,MAP4,KALRN,NRP1,DBN1,NFASC,THY1,LAMA2,MYCBP2,PTN,MAP2,SEMA3C,STX3,ARHGAP35,PHOX2B,TAOK1,RELN,MAP4K4,ROCK1,NPTN,CAMK2A,LAMA3,TOR1A,PLXNB2,LLGL1,ENAH,STMN1,NRBP2,PROM1,RAB10,RTN3,WNT9B,CAMSAP1,SPG11,APP,PLXNA2,ERCC2,APOE,DAB2IP,ACTB,MAP1A,PTPRM,CRTAC…	1.80931	0.420691	102	246
ION TRANSPORT%GOBP%GO:0006811	ION TRANSPORT%GOBP%GO:0006811	0.000168748	0.0034844	1	SLC4A1,ATP2A3,CYBRD1,SLC25A23,ANO1,TRPV2,TPCN1,FYN,ARHGAP1,CACNA2D1,COX15,PKD2,FXYD1,SLC9A3R1,LASP1,CAV1,MCU,TRPM4,FLNA,ITPR1,ATP2B4,TRDN,SFXN3,SLC25A6,JPH2,SLC9A1,MPC2,SLC20A2,SNCA,ITGAV,ENPP1,SNAP23,SLC4A4,PIEZO1,CYB5R2,ACE,GJA1,SLC12A7,SCN7A,CAMK2A,HRG,CALCRL,TCIRG1,SLC2A1,ATP2B1,ANXA6,RALBP1,KCNA4,ANO6,PSEN1,ATP1B3,ORAI1,SLC12A4,VDAC1,TMEM165,SLC32A1,ATP1A3,STIM1	1.62142	0.380818	58	225
TRANSMEMBRANE TRANSPORT%GOBP%GO:0055085	TRANSMEMBRANE TRANSPORT%GOBP%GO:0055085	0.000169549	0.0034844	1	SLC4A1,PPBP,ATP2A3,SLC25A23,ANO1,TRPV2,TPCN1,CACNA2D1,COX15,PKD2,SLC9A3R1,MCU,TRPM4,FLNA,ITPR1,ATP2B4,SLC25A36,TRDN,SFXN3,SLC25A6,JPH2,SLC9A1,MPC2,SLC25A51,TMEM30A,SLC20A2,SEC62,ITGAV,SLC4A4,GJA1,SLC12A7,SCN7A,SORT1,TCIRG1,SLC2A1,ATP2B1,SLC2A4,ANXA6,RALBP1,KCNA4,ANO6,ATP1B3,TIMM21,ORAI1,SLC12A4,TMEM165,SLC32A1,ATP1A3,SEC63,PEX10,CLCN6,PEX16,SLC25A5,SFXN4,PEX6,ABCD2,TOMM40,SLC25A3,PLCG2,ITPR2,ANO1…	1.6869	0.398123	70	213
REGULATION OF CELL PROJECTION ORGANIZATION%GOBP%GO:0031344	REGULATION OF CELL PROJECTION ORGANIZATION%GOBP%GO:0031344	0.000169722	0.0034844	1	RTN4,SDC2,ROR1,FYN,SEMA3D,DPYSL3,PLXNA1,RABGAP1,AGRN,DBNL,PTPN9,CAV1,CAMK2G,EPHA3,SEMA5B,KIDINS220,CYFIP1,MAP4,NRP1,HOMER1,DBN1,CAMK2B,MARK1,SS18L1,THY1,MYCBP2,PTN,GOLGA4,MAP2,SEMA3C,FSCN1,TBC1D9B,CORO1C,ARHGAP35,RELN,DMTN,NPTN,CD44,PTK7,HRG,CDC42EP1,PLXNB2,TBC1D1,FMR1,TGFB3,PLEKHM1,ACTR3,CORO1B,PSEN1,PLXNA2,APOE,DAB2IP,RAPGEF1,ACTR2,ITGA6,PALM,ARAP1,COBL,FXR1,MOV10,HDAC2,NCKAP1,SARM1	1.70853	0.405236	63	203
NEURON DEVELOPMENT%GOBP%GO:0048666	NEURON DEVELOPMENT%GOBP%GO:0048666	0.000169837	0.0034844	1	DAG1,RTN4,SDC2,TGFB2,S100A6,DMD,EPHB4,CTTN,FYN,SEMA3D,FARP1,PLXNA1,LAMA5,AGRN,NOTCH2,DBNL,RAB35,CDNF,THOC2,EPHA3,SEMA5B,FARP2,TAOK3,CYFIP1,DOCK7,MAP4,KALRN,NRP1,DBN1,NFASC,THY1,LAMA2,MYCBP2,PTN,MAP2,SEMA3C,STX3,ARHGAP35,PHOX2B,TAOK1,RELN,MAP4K4,ROCK1,NPTN,CAMK2A,LAMA3,TOR1A,PLXNB2,LLGL1,ENAH,STMN1,RAB10,CAMSAP1,SPG11,APP,PLXNA2,APOE,DAB2IP,ACTB,MAP1A,PTPRM,CRTAC1,RAB8A,GAS7,IQSEC1,MYPN,RAB6A,LMTK…	1.87885	0.442804	93	218
CELL MORPHOGENESIS%GOBP%GO:0000902	CELL MORPHOGENESIS%GOBP%GO:0000902	0.000169895	0.0034844	1	ACTN1,DAG1,SDC2,COL22A1,TGFB2,S100A6,LAMB2,EPHB4,ANO1,CTTN,FYN,SEMA3D,FARP1,PLXNA1,LAMA5,NOTCH2,DBNL,ITGB3,EPHA3,SEMA5B,COL18A1,CDH11,TAOK3,CYFIP1,DOCK7,RILPL1,KALRN,NRP1,DBN1,ITGAV,NFASC,LAMA2,MYCBP2,PTN,MAP2,SEMA3C,ARHGAP35,PHOX2B,TAOK1,RELN,MAP4K4,SHROOM3,ROCK1,NPTN,LAMA3,PXN,PLXNB2,LLGL1,ENAH,RAB10,VAMP3,MYO9B,SPG11,APP,RHOA,PLXNA2,DAB2IP,ACTB,MAP1A,PTPRM,FERMT2,RAB8A,PEAK1,GAS7,ILK,MYPN,LMTK…	2.08187	0.494407	94	198
REGULATION OF PLASMA MEMBRANE BOUNDED CELL PROJECTION ORGANIZATION%GOBP%GO:0120035	REGULATION OF PLASMA MEMBRANE BOUNDED CELL PROJECTION ORGANIZATION%GOBP%GO:0120035	0.000170039	0.0034844	1	RTN4,SDC2,ROR1,FYN,SEMA3D,DPYSL3,PLXNA1,RABGAP1,AGRN,DBNL,PTPN9,CAV1,CAMK2G,EPHA3,SEMA5B,KIDINS220,CYFIP1,MAP4,NRP1,HOMER1,DBN1,CAMK2B,MARK1,SS18L1,THY1,MYCBP2,PTN,GOLGA4,MAP2,SEMA3C,FSCN1,TBC1D9B,CORO1C,ARHGAP35,RELN,DMTN,NPTN,CD44,PTK7,HRG,CDC42EP1,PLXNB2,TBC1D1,FMR1,TGFB3,PLEKHM1,ACTR3,CORO1B,PSEN1,PLXNA2,APOE,DAB2IP,RAPGEF1,ACTR2,ITGA6,PALM,ARAP1	1.71237	0.406433	57	201
POSITIVE REGULATION OF LOCOMOTION%GOBP%GO:0040017	POSITIVE REGULATION OF LOCOMOTION%GOBP%GO:0040017	0.000170358	0.0034844	1	JAM2,IGF1R,RTN4,IGFBP5,THBS4,TGFB2,TJP1,STX4,SEMA3D,RIN2,TGFB1,AGO2,RRAS,ITGB3,GLIPR2,CAV1,MCU,HBEGF,SRPX2,SEMA5B,ADAM17,RARRES2,DOCK7,NRP1,MTOR,FAM89B,JAM3,PDGFRB,THY1,MAPRE2,PTN,SEMA3C,MYADM,STX3,CD74,INSR,ACTN4,MAP4K4,DMTN,MYO1C,COL1A1,PDCD6,MYLK,ITGB1,ANO6,APP,PLVAP,RHOA,DAB2IP,GPNMB,ITGA6,FERMT2,IQSEC1,PRKD2,DOCK5,EGFR,ACTG1,FGF1,NOS3,PTK2,CLASP1,ARHGEF2,DOCK1,MYOC,FLT1,PLCG1,DDRGK1,CXCL12,F…	1.71262	0.407469	71	195
CELLULAR COMPONENT MORPHOGENESIS%GOBP%GO:0032989	CELLULAR COMPONENT MORPHOGENESIS%GOBP%GO:0032989	0.000170358	0.0034844	1	SYNPO2L,DAG1,SDC2,S100A6,EPHB4,ANO1,CTTN,FYN,SEMA3D,FARP1,PLXNA1,LAMA5,NOTCH2,DBNL,PGM5,EPHA3,SEMA5B,TAOK3,MYH11,CYFIP1,DOCK7,KALRN,NRP1,DBN1,PDGFRB,ANKRD1,CD9,NFASC,LAMA2,MYCBP2,PTN,MAP2,SEMA3C,ARHGAP35,PHOX2B,TAOK1,RELN,MAP4K4,ROCK1,NPTN,LAMA3,CSRP1,PLXNB2,LLGL1,ENAH,LMOD2,RAB10,MYO9B,SPG11,APP,PLXNA2,DAB2IP,ACTB,MAP1A,PTPRM,RAB8A,GAS7,MYPN,LMTK2,COBL,APBB1,USP9X,NCKAP1,SUPV3L1,RHOG,DNM2,DICER1…	1.82266	0.43365	81	195
POSITIVE REGULATION OF CELL MOTILITY%GOBP%GO:2000147	POSITIVE REGULATION OF CELL MOTILITY%GOBP%GO:2000147	0.000171821	0.0034844	1	JAM2,IGF1R,RTN4,IGFBP5,THBS4,TGFB2,TJP1,STX4,SEMA3D,RIN2,TGFB1,AGO2,RRAS,ITGB3,GLIPR2,CAV1,MCU,HBEGF,SRPX2,SEMA5B,ADAM17,RARRES2,DOCK7,NRP1,MTOR,FAM89B,JAM3,PDGFRB,THY1,MAPRE2,PTN,SEMA3C,MYADM,CD74,INSR,ACTN4,MAP4K4,DMTN,MYO1C,COL1A1,PDCD6,MYLK,ITGB1,ANO6,APP,PLVAP,RHOA,DAB2IP,GPNMB,ITGA6,FERMT2,IQSEC1,PRKD2,DOCK5,EGFR,ACTG1,FGF1,NOS3,PTK2,CLASP1,ARHGEF2,DOCK1,MYOC,FLT1,PLCG1,DDRGK1,CXCL12,FER,PL…	1.70104	0.406225	70	192
NEURON PROJECTION DEVELOPMENT%GOBP%GO:0031175	NEURON PROJECTION DEVELOPMENT%GOBP%GO:0031175	0.000171821	0.0034844	1	DAG1,RTN4,SDC2,S100A6,EPHB4,CTTN,FYN,SEMA3D,FARP1,PLXNA1,LAMA5,NOTCH2,DBNL,RAB35,CDNF,EPHA3,SEMA5B,TAOK3,CYFIP1,DOCK7,MAP4,KALRN,NRP1,DBN1,NFASC,LAMA2,MYCBP2,PTN,MAP2,SEMA3C,STX3,ARHGAP35,PHOX2B,TAOK1,RELN,MAP4K4,ROCK1,NPTN,CAMK2A,LAMA3,TOR1A,PLXNB2,LLGL1,ENAH,STMN1,RAB10,CAMSAP1,SPG11,APP,PLXNA2,APOE,DAB2IP,ACTB,MAP1A,PTPRM,CRTAC1,RAB8A,GAS7,IQSEC1,MYPN,RAB6A,LMTK2,FRY,COBL,HDAC2,APBB1,USP9X,TBC…	1.94671	0.464895	85	192
POSITIVE REGULATION OF CELL MIGRATION%GOBP%GO:0030335	POSITIVE REGULATION OF CELL MIGRATION%GOBP%GO:0030335	0.000172473	0.0034844	1	JAM2,IGF1R,RTN4,IGFBP5,THBS4,TGFB2,TJP1,STX4,SEMA3D,RIN2,TGFB1,AGO2,RRAS,ITGB3,GLIPR2,CAV1,MCU,HBEGF,SRPX2,SEMA5B,ADAM17,RARRES2,DOCK7,NRP1,MTOR,FAM89B,JAM3,PDGFRB,THY1,MAPRE2,PTN,SEMA3C,MYADM,CD74,INSR,ACTN4,MAP4K4,DMTN,MYO1C,COL1A1,PDCD6,MYLK,ITGB1,ANO6,APP,PLVAP,RHOA,DAB2IP,GPNMB,ITGA6,FERMT2,IQSEC1,PRKD2,DOCK5,EGFR,ACTG1,FGF1,NOS3,PTK2,CLASP1,ARHGEF2,DOCK1,MYOC,FLT1,PLCG1,DDRGK1,CXCL12,FER,PL…	1.74467	0.417727	70	188
CIRCULATORY SYSTEM DEVELOPMENT%GOBP%GO:0072359	CIRCULATORY SYSTEM DEVELOPMENT%GOBP%GO:0072359	0.000172473	0.0034844	1	SYNPO2L,HEG1,MCAM,SGCG,COL22A1,EGFL7,TGFB2,EPHB4,COL4A1,TGFB1,TGFBI,HSPG2,PKD2,RECK,NOTCH2,SGCD,ITGB3,ELN,EMILIN1,CAV1,COL18A1,COL3A1,ECE1,MYH11,NRP1,PLXDC1,CALD1,PDLIM7,PDLIM4,JAM3,PDGFRB,ANKRD1,ITGAV,LOXL2,THY1,SEMA3C,AKAP13,MICAL2,INSR,COL1A2,PDLIM1,GJA1,ANXA2,COL1A1,ROCK1,MEF2D,S1PR1,MYLK,CALCRL	1.74353	0.417455	49	188
ANATOMICAL STRUCTURE FORMATION INVOLVED IN MORPHOGENESIS%GOBP%GO:0048646	ANATOMICAL STRUCTURE FORMATION INVOLVED IN MORPHOGENESIS%GOBP%GO:0048646	0.000172682	0.0034844	1	JAM2,SYNPO2L,MCAM,ACTN1,ITGB4,COL22A1,TGFB2,COL12A1,EPHB4,COL4A1,COL4A2,TGFB1,MBOAT7,TGFBI,RECK,ITGB3,PGM5,COL6A1,PTGFRN,ITGB5,COL18A1,SPTBN1,ADAM17,COL8A1,MYH11,NRP1,PLXDC1,CALD1,JAM3,PDGFRB,ANKRD1,ITGAV,LOXL2,CD9,THY1,LUZP1,PEF1,SMAD2,ANXA2,PDCD6,LAMA3,CSRP1,S1PR1,PLXNB2,CALCRL,ITGB1,ITGA7,LMOD2,FBN2,PXDN,PROM1,CDC73,SCRIB,DAB2IP,NOLC1,POLR1B,SRPK2,PTPRM,STIM1,MYPN,COBL,HDAC2,TCOF1,DOCK5,ACTG1,…	1.93541	0.465942	72	180
ENZYME-LINKED RECEPTOR PROTEIN SIGNALING PATHWAY%GOBP%GO:0007167	ENZYME-LINKED RECEPTOR PROTEIN SIGNALING PATHWAY%GOBP%GO:0007167	0.000173853	0.0034844	1	IGF1R,TGFB2,EPHB4,ROR1,FYN,COL4A2,TGFB1,INHBE,ABI1,LTBP2,COL4A6,FMOD,HBEGF,EPHA3,IGF2,ITGB5,COL3A1,ADAM17,RARRES2,CAV2,KALRN,NRP1,PDGFRB,PTN,INSR,SAMD12,COL1A2,SMAD2,MYO1C,CBL,PDCD6,SORT1,STAT5B,PXN,ITGB1,TGFB3,STMN1,TGFBRAP1,PTPN11,PTPN2,DAB2IP,RAPGEF1,GIGYF1,VAV2,EFEMP1,SORBS1,PLAT,FERMT2,RAB14,LMTK2,PRKD2,REPS2,EGFR,USP9X,TYK2,NPPA,FGF1,CHRD,DDR1,NCK2,PTK2,MYOC,FLT1,PLCG1	1.87563	0.457401	64	162
MUSCLE STRUCTURE DEVELOPMENT%GOBP%GO:0061061	MUSCLE STRUCTURE DEVELOPMENT%GOBP%GO:0061061	0.000174856	0.0034844	1	MYOF,JAM2,SYNPO2L,ACTN1,DAG1,SGCG,TGFB2,DMD,SGCE,TGFB1,UTRN,SGCD,PGM5,SVIL,CAV1,HBEGF,PTGFRN,FHL3,MYEF2,SGCA,COL6A3,DYSF,CAV2,MYL6B,MYH11,PDLIM7,PDLIM4,PDGFRB,ANKRD1,SPEG,CD9,LAMA2,AKAP13,PDLIM1,ACTN4,SORT1,MEF2D,CSRP1,S1PR1,MYLK,ITGB1,ITGA7,ITGA11,LMOD2,LEMD2,IGSF8,SORBS2,MYL6,MYPN,ALPK3,PDLIM3,FXR1,DOCK5,FHL1,CD81,PDLIM2,CSRP2,DOCK1,TTN,EMD,TAGLN	2.00677	0.495005	61	148
EXTRACELLULAR MATRIX ORGANIZATION%REACTOME%R-HSA-1474244.2	EXTRACELLULAR MATRIX ORGANIZATION%REACTOME%R-HSA-1474244.2	0.000175685	0.0034844	1	JAM2,ACTN1,TNXB,DAG1,CAPN5,MFAP5,ITGB4,SDC2,COL22A1,TGFB2,COL12A1,DMD,LAMB2,COL16A1,COL4A1,CASK,COL4A2,TGFB1,LAMA5,COMP,AGRN,LTBP1,HSPG2,BGN,ITGA1,LTBP2,COL4A6,VCAN,ITGB3,ELN,FMOD,COL6A1,HAPLN1,KLKB1,ITGB5,COL18A1,COL3A1,COL6A3,COL6A2,TIMP2,ADAM17,ASPN,COL8A1,LTBP4,MFAP2,LUM,PCOLCE2,LOXL1,NID2,DCN,HTRA1,JAM3,COL5A1,ITGAV,LOXL2,COL14A1,LAMA2,LTBP3,MFAP4,COL1A2,COL1A1,CD44,LAMA3,ITGA9,ITGB1,ITGA7,C…	2.69553	0.662983	83	152
ANIMAL ORGAN MORPHOGENESIS%GOBP%GO:0009887	ANIMAL ORGAN MORPHOGENESIS%GOBP%GO:0009887	0.000175685	0.0034844	1	SYNPO2L,FBXW11,MFAP5,ITGB4,TGFB2,LAMB2,EPHB4,TGFB1,LAMA5,COMP,AGRN,HSPG2,PKD2,NOTCH2,SLC9A3R1,ELN,CAV1,COL18A1,RAB23,MFAP2,DCN,TMEM119,NRP1,COL5A1,ANKRD1,THY1,LAMA2,SEMA3C,MGP,MICAL2,INSR,COL1A2,SMAD2,COL1A1,LAMA3,S1PR1,MYLK,RAB33B,TGFB3,FBN2,PROM1,ANXA6,SCRIB,NPNT,CRIP1,PTPRM,ITGA6,EFEMP1,STIM1,HCCS,HDAC2,FHL1,FGF1,NOS3,NTN4,PTK2,TTN,ACTA2,LAMC1,FBN1,COL5A2,MYO6,LAMC3	1.7638	0.433817	63	152
CELL MORPHOGENESIS INVOLVED IN DIFFERENTIATION%GOBP%GO:0000904	CELL MORPHOGENESIS INVOLVED IN DIFFERENTIATION%GOBP%GO:0000904	0.00017618	0.0034844	1	ACTN1,DAG1,SDC2,COL22A1,S100A6,LAMB2,EPHB4,FYN,SEMA3D,FARP1,PLXNA1,LAMA5,NOTCH2,ITGB3,EPHA3,SEMA5B,COL18A1,CYFIP1,DOCK7,RILPL1,KALRN,NRP1,ITGAV,NFASC,LAMA2,MYCBP2,PTN,MAP2,SEMA3C,ARHGAP35,PHOX2B,RELN,NPTN,LAMA3,PXN,PLXNB2,LLGL1,ENAH,RAB10,VAMP3,SPG11,APP,RHOA,PLXNA2,ACTB,MAP1A,PTPRM,FERMT2,RAB8A,PEAK1,ILK,MYPN,LMTK2,COBL,APBB1,USP9X,RHOG,MYH9,NTN4,PTK2,TAOK2,APLP2,PARVB,SRCIN1,LAMC1,WASL,CXCL12,T…	2.01914	0.497734	73	150
CELL PART MORPHOGENESIS%GOBP%GO:0032990	CELL PART MORPHOGENESIS%GOBP%GO:0032990	0.00017618	0.0034844	1	DAG1,SDC2,S100A6,EPHB4,ANO1,CTTN,FYN,SEMA3D,FARP1,PLXNA1,LAMA5,NOTCH2,DBNL,EPHA3,SEMA5B,TAOK3,CYFIP1,DOCK7,KALRN,NRP1,DBN1,NFASC,LAMA2,MYCBP2,PTN,MAP2,SEMA3C,ARHGAP35,PHOX2B,TAOK1,RELN,MAP4K4,ROCK1,NPTN,LAMA3,PLXNB2,LLGL1,ENAH,RAB10,MYO9B,SPG11,APP,PLXNA2,DAB2IP,ACTB,MAP1A,PTPRM,RAB8A,GAS7,MYPN,LMTK2,COBL,APBB1,USP9X,NCKAP1,SUPV3L1,RHOG,DNM2,DICER1,PTK2,TAOK2,APLP2,WASL,CXCL12,MYH14,IQGAP1,BSG,VA…	1.89939	0.468216	68	150
CELL JUNCTION ORGANIZATION%GOBP%GO:0034330	CELL JUNCTION ORGANIZATION%GOBP%GO:0034330	0.000176305	0.0034844	1	IGF1R,ACTN1,ITGB4,TGFB2,TJP1,CTTN,FYN,FARP1,TGFB1,AGRN,DBNL,DST,CDH11,SNCA,ESAM,CYFIP1,RAB8B,JAM3,DBN1,PPFIA4,CD9,THY1,MYADM,FSCN1,INSR,ERC1,TLN1,GJA1,ARVCF,PLXNB2,TGFB3,LIMS1,PIP5K1C,PSEN1,APP,VCL,SYNPO,RHOA,APOE,ACTB,PPFIA1,UNC13B,ITGA6,SORBS1,FERMT2,MPP7,PEAK1,PLEC,DLG1	1.90096	0.470794	49	145
CELL-CELL ADHESION%GOBP%GO:0098609	CELL-CELL ADHESION%GOBP%GO:0098609	0.000176305	0.0034844	1	JAM2,HBB,ACTN1,THBS4,TGFB2,TJP1,LAMA5,RAP2B,ITGA1,ITGB3,FLNA,SRPX2,ITGB5,DLG3,CDH11,ESAM,JAM3,NT5E,ITGAV,NFASC,THY1,COL14A1,APOA4,TLN1,ARVCF,PCDHGC3,ROCK1,NPTN,CD44,LAMA3,CSRP1,ITGA9,PLXNB2,GNAS,ITGB1,ITGA7,CEACAM8,ITGA11,LIMS1,SCRIB,PIP5K1C,PSEN1,NPNT,VCL,ACTB,PTPRM,ITGA6,DLG1,ILK,MYPN,EGFR,HMCN1,ACTG1,MYH9	1.85687	0.459872	54	145
CELL PROJECTION MORPHOGENESIS%GOBP%GO:0048858	CELL PROJECTION MORPHOGENESIS%GOBP%GO:0048858	0.00017646	0.0034844	1	DAG1,SDC2,S100A6,EPHB4,ANO1,CTTN,FYN,SEMA3D,FARP1,PLXNA1,LAMA5,NOTCH2,DBNL,EPHA3,SEMA5B,TAOK3,CYFIP1,DOCK7,KALRN,NRP1,DBN1,NFASC,LAMA2,MYCBP2,PTN,MAP2,SEMA3C,ARHGAP35,PHOX2B,TAOK1,RELN,MAP4K4,ROCK1,NPTN,LAMA3,PLXNB2,LLGL1,ENAH,RAB10,MYO9B,SPG11,APP,PLXNA2,DAB2IP,ACTB,MAP1A,PTPRM,RAB8A,GAS7,MYPN,LMTK2,COBL,APBB1,USP9X,NCKAP1,RHOG,DNM2,DICER1,PTK2,TAOK2,APLP2,WASL,CXCL12,IQGAP1,BSG,VASP	1.93893	0.481368	66	142
PLASMA MEMBRANE BOUNDED CELL PROJECTION MORPHOGENESIS%GOBP%GO:0120039	PLASMA MEMBRANE BOUNDED CELL PROJECTION MORPHOGENESIS%GOBP%GO:0120039	0.000176803	0.0034844	1	DAG1,SDC2,S100A6,EPHB4,CTTN,FYN,SEMA3D,FARP1,PLXNA1,LAMA5,NOTCH2,DBNL,EPHA3,SEMA5B,TAOK3,CYFIP1,DOCK7,KALRN,NRP1,DBN1,NFASC,LAMA2,MYCBP2,PTN,MAP2,SEMA3C,ARHGAP35,PHOX2B,TAOK1,RELN,MAP4K4,ROCK1,NPTN,LAMA3,PLXNB2,LLGL1,ENAH,RAB10,MYO9B,SPG11,APP,PLXNA2,DAB2IP,ACTB,MAP1A,PTPRM,RAB8A,GAS7,MYPN,LMTK2,COBL,APBB1,USP9X,NCKAP1,RHOG,DNM2,DICER1,PTK2,TAOK2,APLP2,WASL,CXCL12,IQGAP1,BSG,VASP	1.91097	0.475368	65	140
NEURON PROJECTION MORPHOGENESIS%GOBP%GO:0048812	NEURON PROJECTION MORPHOGENESIS%GOBP%GO:0048812	0.000177274	0.0034844	1	DAG1,SDC2,S100A6,EPHB4,CTTN,FYN,SEMA3D,FARP1,PLXNA1,LAMA5,NOTCH2,DBNL,EPHA3,SEMA5B,TAOK3,CYFIP1,DOCK7,KALRN,NRP1,DBN1,NFASC,LAMA2,MYCBP2,PTN,MAP2,SEMA3C,ARHGAP35,PHOX2B,TAOK1,RELN,MAP4K4,ROCK1,NPTN,LAMA3,PLXNB2,LLGL1,ENAH,RAB10,SPG11,APP,PLXNA2,DAB2IP,ACTB,MAP1A,PTPRM,RAB8A,GAS7,MYPN,LMTK2,COBL,APBB1,USP9X,NCKAP1,RHOG,DNM2,DICER1,PTK2,TAOK2,APLP2,WASL,CXCL12,IQGAP1,BSG,VASP	1.92638	0.480445	64	137
ACTIN FILAMENT ORGANIZATION%GOBP%GO:0007015	ACTIN FILAMENT ORGANIZATION%GOBP%GO:0007015	0.000177274	0.0034844	1	SPTA1,ACTN1,MYO1D,DPYSL3,ABI1,SVIL,MCU,FLNA,SPIRE1,ITGB5,PLS3,CALD1,DBN1,HIP1,FSCN1,MICAL2,CORO1C,PDLIM1,LIMA1,DMTN,MYO1C,SHROOM3,GSN,ITGB1,ENAH,LMOD2,CUL3,DIAPH2,ACTR3,MPRIP,CORO1B,RHOA,MICAL3,CORO6,TRIOBP,ACTR2,SORBS1,ARAP1,DLG1,GAS7,ARRB1,COBL,HMCN1,RHOG,ARHGEF2,ELMO2,TTN,TPM3,WASL,MYO6,ARPC5,XIRP2,TPM4,INPPL1,LMOD1,MYO1B,ANG,PPP1R9B,MARCKSL1	1.81843	0.453522	59	137
MALIGNANT PLEURAL MESOTHELIOMA%WIKIPATHWAYS_20220510%WP5087%HOMO SAPIENS	MALIGNANT PLEURAL MESOTHELIOMA%WIKIPATHWAYS_20220510%WP5087%HOMO SAPIENS	0.000177336	0.0034844	1	IGF1R,PLCB4,ITGB4,LAMB2,ROR1,COL4A1,COL4A2,TGFB1,LAMA5,ITGA1,COL4A6,ITGB3,MCU,HBEGF,CTGF,PRKAG1,IGF2,CDH11,PRKAA2,MTOR,ITGAV,CDK4,CSNK2A2,INSR,PRKAB2,CD44,MEF2D,LAMA3,AJUBA,ITGB1,RB1CC1,CSNK1A1,LAMA4,CCND2,RPS6KB2,COL4A3,ITGA6,FZD7,PRKAB1,CSNK2A1,PRKAA1,BAG2,RNF2,EGFR,ACTG1,RAF1,ACTA2,FLT1,GABPA,MKNK1,LAMC1,CXCL12,CSNK1E,MOB1A,MAPK1,MAP3K5,GRB2	1.79333	0.446823	57	139
INTEGRIN SIGNALLING PATHWAY%PANTHER PATHWAY%P00034	INTEGRIN SIGNALLING PATHWAY%PANTHER PATHWAY%P00034	0.000177746	0.0034844	1	ACTN1,ITGB4,COL12A1,LAMB2,COL16A1,FYN,COL4A1,COL4A2,LAMA5,RAP2B,RRAS,ITGA1,COL4A6,CAV1,COL6A1,FLNA,ITGB5,COL3A1,COL6A3,COL6A2,COL8A1,COL5A1,ITGAV,COL14A1,LAMA2,RAP1B,COL1A2,TLN1,ACTN4,COL1A1,LAMA3,PXN,ITGA9,ITGB1,ITGA7,ITGA11,LIMS1,PIK3C2B,LAMA4,VCL,RHOA,ACTB,COL4A3,RAPGEF1,ITGA6,ILK,COL5A3,ACTG1,NTN4,RAF1,PTK2,ELMO2,DOCK1,PARVB,LAMC1,COL5A2,LAMC3,ARPC5,ARF6,VASP	2.21404	0.567235	60	113
POSITIVE REGULATION OF CELL PROJECTION ORGANIZATION%GOBP%GO:0031346	POSITIVE REGULATION OF CELL PROJECTION ORGANIZATION%GOBP%GO:0031346	0.000178253	0.0034844	1	ROR1,DPYSL3,PLXNA1,AGRN,DBNL,EPHA3,KIDINS220,CYFIP1,NRP1,DBN1,CAMK2B,SS18L1,PTN,GOLGA4,FSCN1,CORO1C,ARHGAP35,RELN,NPTN,PTK7,CDC42EP1,PLXNB2,FMR1,TGFB3,PLEKHM1,ACTR3,CORO1B,PLXNA2,APOE,DAB2IP,RAPGEF1,ACTR2,ITGA6,PALM,ARAP1	1.97079	0.511926	35	102
CELL-SUBSTRATE ADHESION%GOBP%GO:0031589	CELL-SUBSTRATE ADHESION%GOBP%GO:0031589	0.000180278	0.0034844	1	ACTN1,ITGB4,LAMB2,CTTN,SGCE,LAMA5,ITGA1,ITGB3,EMILIN1,BCAM,ITGB5,COL3A1,CDH11,NID2,NRP1,ITGAV,THY1,CD44,PXN,ITGA9,ITGB1,THBS3,ITGA7,ITGA11,VAMP3,NPNT,VCL,RHOA,SORBS3,FBLN5,PPFIA1,ITGA6,SORBS1,FERMT2,PEAK1,ILK,NTN4,DDR1,TAOK2,PARVB,SRCIN1,LAMC1,FGG,FER,LAMC3	1.89369	0.507723	45	83
FOCAL ADHESION%WIKIPATHWAYS_20220510%WP306%HOMO SAPIENS	FOCAL ADHESION%WIKIPATHWAYS_20220510%WP306%HOMO SAPIENS	0.000180375	0.0034844	1	IGF1R,ACTN1,ITGB4,THBS4,LAMB2,FYN,COL4A1,COL4A2,LAMA5,COMP,THBS2,ITGA1,COL4A6,ITGB3,FLNA,ITGB5,CAV2,ITGAV,BAD,ARHGAP35,COL1A2,TLN1,RELN,ACTN4,COL1A1,ROCK1,LAMA3,PXN,MYLK,ITGB1,THBS3,ITGA7,LAMA4,PIP5K1C,CCND2,RAPGEF1,VAV2,ITGA6,COL5A3,EGFR,ACTG1,RAF1,DOCK1,PARVB,FLT1,LAMC1,COL5A2,MYL12A,VASP,MAPK1	2.29454	0.607664	50	91
EXTERNAL ENCAPSULATING STRUCTURE ORGANIZATION%GOBP%GO:0045229	EXTERNAL ENCAPSULATING STRUCTURE ORGANIZATION%GOBP%GO:0045229	0.000180832	0.0034844	1	ADAMTSL3,TNXB,POSTN,COL22A1,TGFB2,COL12A1,MATN2,LAMB2,COL16A1,COL4A1,COL4A2,TGFB1,TGFBI,ABI3BP,RECK,COL4A6,EMILIN1,DPT,COL18A1,COL3A1,COL8A1,LUM,MYH11,LOXL1,NID2,PAPLN,COL5A1,LOXL2,COL14A1,LTBP3,MFAP4,COL1A2,COL1A1,GSN,COLGALT1,ADAMTS4,FLOT1,PXDN,NID1,NPNT,APP,COL4A3,FBLN5,LOXL3	2.55785	0.691108	44	79
CELL JUNCTION ASSEMBLY%GOBP%GO:0034329	CELL JUNCTION ASSEMBLY%GOBP%GO:0034329	0.000180897	0.0034844	1	ACTN1,ITGB4,TJP1,CTTN,FARP1,DBNL,DST,CDH11,ESAM,JAM3,CD9,THY1,FSCN1,TLN1,GJA1,ARVCF,PLXNB2,PIP5K1C,VCL,RHOA,ACTB,ITGA6,SORBS1,FERMT2,MPP7,PEAK1,PLEC,DLG1,ACTG1,TAOK2,PKN2,LAMC1,TBCD	1.96728	0.530904	33	80
MUSCLE ORGAN DEVELOPMENT%GOBP%GO:0007517	MUSCLE ORGAN DEVELOPMENT%GOBP%GO:0007517	0.000181094	0.0034844	1	DAG1,SGCG,TGFB2,DMD,SGCE,TGFB1,UTRN,SGCD,SVIL,CAV1,HBEGF,FHL3,SGCA,COL6A3,CAV2,MYL6B,ANKRD1,SPEG,LAMA2,MEF2D,S1PR1,MYLK,ITGA7,ITGA11,LEMD2,IGSF8,MYL6,FXR1,FHL1,TTN,EMD,TAGLN	1.85993	0.503971	32	78
SKELETAL SYSTEM DEVELOPMENT%GOBP%GO:0001501	SKELETAL SYSTEM DEVELOPMENT%GOBP%GO:0001501	0.000181094	0.0034844	1	TGM2,TGFB2,HAPLN3,TGFB1,COMP,VCAN,HAPLN1,FLNA,NPR3,OGN,PRELP,CDH11,RAB23,PLS3,TMEM119,AKAP13,MGP,COL1A2,LRRC17,SPP2,GJA1,ANXA2,COL1A1,CD44,GNAS,ADAMTS4,RAB33B,FBN2,VKORC1,KIAA1217,ANXA6,RHOA,TRIP11	2.16619	0.586955	33	78
EXTRACELLULAR STRUCTURE ORGANIZATION%GOBP%GO:0043062	EXTRACELLULAR STRUCTURE ORGANIZATION%GOBP%GO:0043062	0.000181094	0.0034844	1	ADAMTSL3,TNXB,POSTN,COL22A1,TGFB2,COL12A1,MATN2,LAMB2,COL16A1,COL4A1,COL4A2,TGFB1,TGFBI,ABI3BP,RECK,COL4A6,EMILIN1,DPT,COL18A1,COL3A1,COL8A1,LUM,MYH11,LOXL1,NID2,PAPLN,COL5A1,LOXL2,COL14A1,LTBP3,MFAP4,COL1A2,COL1A1,GSN,COLGALT1,ADAMTS4,FLOT1,PXDN,NID1,NPNT,APP,COL4A3,FBLN5,LOXL3	2.56038	0.693763	44	78
EXTRACELLULAR MATRIX ORGANIZATION%GOBP%GO:0030198	EXTRACELLULAR MATRIX ORGANIZATION%GOBP%GO:0030198	0.000181094	0.0034844	1	ADAMTSL3,TNXB,POSTN,COL22A1,TGFB2,COL12A1,MATN2,LAMB2,COL16A1,COL4A1,COL4A2,TGFB1,TGFBI,ABI3BP,RECK,COL4A6,EMILIN1,DPT,COL18A1,COL3A1,COL8A1,LUM,MYH11,LOXL1,NID2,PAPLN,COL5A1,LOXL2,COL14A1,LTBP3,MFAP4,COL1A2,COL1A1,GSN,COLGALT1,ADAMTS4,FLOT1,PXDN,NID1,NPNT,APP,COL4A3,FBLN5,LOXL3	2.56038	0.693763	44	78
REGULATION OF CELL JUNCTION ASSEMBLY%GOBP%GO:1901888	REGULATION OF CELL JUNCTION ASSEMBLY%GOBP%GO:1901888	0.000181884	0.0034844	1	TJP1,COL16A1,AGRN,CAV1,SRPX2,EPHA3,SLC9A1,SNCA,PTPRA,NRP1,PHLDB2,THY1,MYCBP2,RAP1B,CORO1C,TLN1,ACE,MAP4K4,DMTN,MYO1C,ROCK1,HRG,FLOT1,DAPK3,LIMS1,APP,VCL,RHOA,RAPGEF1,FERMT2,PEAK1,ACE2,ACTG1,PTK2,CLASP1,SLK,MYOC	1.90719	0.530506	37	68
NEURON PROJECTION GUIDANCE%GOBP%GO:0097485	NEURON PROJECTION GUIDANCE%GOBP%GO:0097485	0.000182749	0.0034844	1	DAG1,EPHB4,FYN,SEMA3D,PLXNA1,LAMA5,NOTCH2,EPHA3,SEMA5B,CYFIP1,KALRN,NRP1,NFASC,LAMA2,MYCBP2,SEMA3C,ARHGAP35,RELN,NPTN,LAMA3,PLXNB2,ENAH,APP,PLXNA2,PTPRM	1.7953	0.508178	25	62
AXON GUIDANCE%GOBP%GO:0007411	AXON GUIDANCE%GOBP%GO:0007411	0.000182749	0.0034844	1	DAG1,EPHB4,FYN,SEMA3D,PLXNA1,LAMA5,NOTCH2,EPHA3,SEMA5B,CYFIP1,KALRN,NRP1,NFASC,LAMA2,MYCBP2,SEMA3C,ARHGAP35,RELN,NPTN,LAMA3,PLXNB2,ENAH,APP,PLXNA2,PTPRM	1.7953	0.508178	25	62
DISEASES OF GLYCOSYLATION%REACTOME%R-HSA-3781865.2	DISEASES OF GLYCOSYLATION%REACTOME%R-HSA-3781865.2	0.000182949	0.0034844	1	ADAMTSL3,DAG1,SDC2,CFP,DPM3,THSD4,DPM1,AGRN,HSPG2,BGN,NOTCH2,THBS2,VCAN,FMOD,OGN,EXT2,SEMA5B,PRELP,LUM,DCN,B3GALT6,MOGS,ADAMTS4	2.12619	0.603789	23	61
CELL-CELL COMMUNICATION%REACTOME DATABASE ID RELEASE 81%1500931	CELL-CELL COMMUNICATION%REACTOME DATABASE ID RELEASE 81%1500931	0.000183184	0.0034844	1	ACTN1,ITGB4,FYN,CASK,FLNA,DST,CDH11,SPTBN1,SIRPB1,ACTN4,LAMA3,PXN,ITGB1,LIMS1,PTPN11,SPTAN1,ITGA6,FERMT2,PLEC,NCK1,ILK,NCK2,PTK2,PARVB,WASL,CADM1,IQGAP1,VASP	1.91794	0.550544	28	57
CALCIUM ION TRANSPORT%GOBP%GO:0006816	CALCIUM ION TRANSPORT%GOBP%GO:0006816	0.000184162	0.0034844	1	ATP2A3,SLC25A23,TRPV2,FYN,CACNA2D1,PKD2,CAV1,MCU,TRPM4,FLNA,ITPR1,ATP2B4,TRDN,JPH2,ITGAV,CAMK2A,CALCRL,ATP2B1,ANO6,PSEN1,ORAI1,TMEM165,STIM1	2.18303	0.634928	23	53
TRANSLOCATION OF SLC2A4 (GLUT4) TO THE PLASMA MEMBRANE%REACTOME%R-HSA-1445148.2	TRANSLOCATION OF SLC2A4 (GLUT4) TO THE PLASMA MEMBRANE%REACTOME%R-HSA-1445148.2	0.000185426	0.0034844	1	STX4,PRKAG1,EXOC2,PRKAA2,SNAP23,PRKAB2,MYO1C,RALGAPB,TBC1D1,RAB10,KIFAP3,SLC2A4,EXOC7,EXOC3,KIF3B,RAB14,RAB8A,PRKAB1,MYH9,YWHAQ,LNPEP,YWHAH,EXOC5,EXOC4,EXOC1	1.98869	0.597634	25	45
COLLAGEN FORMATION%REACTOME DATABASE ID RELEASE 81%1474290	COLLAGEN FORMATION%REACTOME DATABASE ID RELEASE 81%1474290	0.000185426	0.0034844	1	ITGB4,COL22A1,COL12A1,COL16A1,COL4A1,COL4A2,COL4A6,COL6A1,COL18A1,COL3A1,COL6A3,COL6A2,COL8A1,PCOLCE2,LOXL1,COL5A1,LOXL2,COL14A1,COL1A2,COL1A1,LAMA3,COLGALT1,PXDN,COL4A3,LOXL3,ITGA6,PCOLCE,PLEC,COL5A3	2.38086	0.715489	29	45
BETA1 INTEGRIN CELL SURFACE INTERACTIONS%PATHWAY INTERACTION DATABASE NCI-NATURE CURATED DATA%BETA1 INTEGRIN CELL SURFACE INTERACTIONS	BETA1 INTEGRIN CELL SURFACE INTERACTIONS%PATHWAY INTERACTION DATABASE NCI-NATURE CURATED DATA%BETA1 INTEGRIN CELL SURFACE INTERACTIONS	0.000185805	0.0034844	1	JAM2,TGM2,LAMB2,COL4A1,LAMA5,TGFBI,THBS2,ITGA1,COL4A6,COL6A1,COL18A1,COL3A1,COL6A3,COL6A2,COL5A1,ITGAV,LAMA2,COL1A2,COL1A1,LAMA3,ITGA9,ITGB1,ITGA7,ITGA11,LAMA4,NID1,NPNT,COL4A3,IGSF8,ITGA6	2.26027	0.675107	30	47
CALCIUM ION TRANSMEMBRANE TRANSPORT%GOBP%GO:0070588	CALCIUM ION TRANSMEMBRANE TRANSPORT%GOBP%GO:0070588	0.000187864	0.0034844	1	ATP2A3,SLC25A23,TRPV2,CACNA2D1,PKD2,MCU,TRPM4,FLNA,ITPR1,ATP2B4,TRDN,JPH2,ITGAV,ATP2B1,ANO6,ORAI1,TMEM165	2.16979	0.658709	17	43
INTEGRIN CELL SURFACE INTERACTIONS%REACTOME%R-HSA-216083.4	INTEGRIN CELL SURFACE INTERACTIONS%REACTOME%R-HSA-216083.4	0.000188111	0.0034844	1	JAM2,COL16A1,COL4A1,COL4A2,COMP,AGRN,HSPG2,ITGA1,ITGB3,ITGB5,COL18A1,LUM,JAM3,ITGAV,CD44,ITGA9,ITGB1,ITGA7,ITGA11,COL4A3,ITGA6	2.00592	0.622048	21	39
INTEGRINS IN ANGIOGENESIS%PATHWAY INTERACTION DATABASE NCI-NATURE CURATED DATA%INTEGRINS IN ANGIOGENESIS	INTEGRINS IN ANGIOGENESIS%PATHWAY INTERACTION DATABASE NCI-NATURE CURATED DATA%INTEGRINS IN ANGIOGENESIS	0.000188608	0.0034844	1	IGF1R,MFGE8,COL4A1,COL4A6,ITGB3,COL6A1,COL3A1,COL6A3,COL6A2,PI4KA,COL5A1,ITGAV,COL1A2,TLN1,CBL,COL1A1,ROCK1,PXN,PTPN11,VCL,RHOA,COL4A3,ILK	2.23707	0.683117	23	42
POSITIVE REGULATION OF NEURON PROJECTION DEVELOPMENT%GOBP%GO:0010976	POSITIVE REGULATION OF NEURON PROJECTION DEVELOPMENT%GOBP%GO:0010976	0.000188608	0.0034844	1	ROR1,DPYSL3,DBNL,EPHA3,KIDINS220,NRP1,DBN1,CAMK2B,PTN,ARHGAP35,RELN,NPTN,PTK7,PLXNB2,APOE,DAB2IP,RAPGEF1,ITGA6,COBL	1.95102	0.595768	19	42
PID_INTEGRIN1_PATHWAY%MSIGDB_C2%PID_INTEGRIN1_PATHWAY	PID_INTEGRIN1_PATHWAY%MSIGDB_C2%PID_INTEGRIN1_PATHWAY	0.000188929	0.0034844	1	JAM2,LAMB2,COL4A1,LAMA5,TGFBI,THBS2,ITGA1,COL4A6,COL6A1,COL18A1,COL3A1,ITGAV,COL1A2,COL1A1,LAMA3,ITGB1,ITGA7,LAMA4,NID1,NPNT,COL4A3,IGSF8,ITGA6,CD81,LAMC1,FBN1,COL5A2	2.11411	0.671543	27	35
ARF6 TRAFFICKING EVENTS%PATHWAY INTERACTION DATABASE NCI-NATURE CURATED DATA%ARF6 TRAFFICKING EVENTS	ARF6 TRAFFICKING EVENTS%PATHWAY INTERACTION DATABASE NCI-NATURE CURATED DATA%ARF6 TRAFFICKING EVENTS	0.000189358	0.0034844	1	ITGA1,EXOC2,ITGAV,ITGA9,ITGB1,ITGA7,ITGA11,VAMP3,SLC2A4,PIP5K1C,EXOC7,ITGA6,EXOC3,ASAP2,DNM2,BIN1,EXOC5,ARF6,EXOC4,EXOC1,CLTC,CTNNB1	1.91702	0.612188	22	34
COLLAGEN BIOSYNTHESIS AND MODIFYING ENZYMES%REACTOME%R-HSA-1650814.4	COLLAGEN BIOSYNTHESIS AND MODIFYING ENZYMES%REACTOME%R-HSA-1650814.4	0.000189358	0.0034844	1	COL22A1,COL12A1,COL16A1,COL4A1,COL4A2,COL4A6,COL6A1,COL18A1,COL3A1,COL6A3,COL6A2,COL8A1,PCOLCE2,COL5A1,COL14A1,COL1A2,COL1A1,COLGALT1,COL4A3,PCOLCE,COL5A3	2.19925	0.702314	21	34
ECM PROTEOGLYCANS%REACTOME DATABASE ID RELEASE 81%3000178	ECM PROTEOGLYCANS%REACTOME DATABASE ID RELEASE 81%3000178	0.000189358	0.0034844	1	TNXB,DAG1,TGFB2,LAMB2,TGFB1,LAMA5,COMP,AGRN,HSPG2,BGN,VCAN,ITGB3,FMOD,HAPLN1,ITGB5,ASPN,LUM,DCN,ITGAV,LAMA2,LAMA3,ITGA9,ITGB1,ITGA7,TGFB3,LAMA4	2.58296	0.824849	26	34
ARRHYTHMOGENIC RIGHT VENTRICULAR CARDIOMYOPATHY%WIKIPATHWAYS_20220510%WP2118%HOMO SAPIENS	ARRHYTHMOGENIC RIGHT VENTRICULAR CARDIOMYOPATHY%WIKIPATHWAYS_20220510%WP2118%HOMO SAPIENS	0.000189358	0.0034844	1	ACTN1,DAG1,SGCG,ITGB4,SGCB,DMD,CACNA2D1,ITGA1,SGCD,ITGB3,SGCA,ITGB5,ITGAV,ACTN4,ITGB1,ITGA7,CACNA2D2,ITGA6,LMNA,ACTG1	2.16263	0.69062	20	34
PRIMARY FOCAL SEGMENTAL GLOMERULOSCLEROSIS (FSGS)%WIKIPATHWAYS_20220510%WP2572%HOMO SAPIENS	PRIMARY FOCAL SEGMENTAL GLOMERULOSCLEROSIS (FSGS)%WIKIPATHWAYS_20220510%WP2572%HOMO SAPIENS	0.000189358	0.0034844	1	DAG1,ITGB4,LAMB2,FYN,IRF6,TGFB1,LAMA5,AGRN,ITGB3,ITGAV,TLN1,ACTN4,ITGB1,LIMS1,SYNPO,MME,COL4A3,NCK1,MYH9,YWHAQ	2.13501	0.681801	20	34
NEGATIVE REGULATION OF BLOOD VESSEL MORPHOGENESIS%GOBP%GO:2000181	NEGATIVE REGULATION OF BLOOD VESSEL MORPHOGENESIS%GOBP%GO:2000181	0.000189358	0.0034844	1	THBS4,TGFB2,COL4A2,HSPG2,THBS2,EMILIN1,ATP2B4,PF4,DCN,MECP2,ROCK1,HRG,AGO1,HGS,DAB2IP,COL4A3,PTPRM	2.03579	0.650115	17	34
NEGATIVE REGULATION OF ANGIOGENESIS%GOBP%GO:0016525	NEGATIVE REGULATION OF ANGIOGENESIS%GOBP%GO:0016525	0.000189358	0.0034844	1	THBS4,TGFB2,COL4A2,HSPG2,THBS2,EMILIN1,ATP2B4,PF4,DCN,MECP2,ROCK1,HRG,AGO1,HGS,DAB2IP,COL4A3,PTPRM	2.03579	0.650115	17	34
NEGATIVE REGULATION OF VASCULATURE DEVELOPMENT%GOBP%GO:1901343	NEGATIVE REGULATION OF VASCULATURE DEVELOPMENT%GOBP%GO:1901343	0.000189358	0.0034844	1	THBS4,TGFB2,COL4A2,HSPG2,THBS2,EMILIN1,ATP2B4,PF4,DCN,MECP2,ROCK1,HRG,AGO1,HGS,DAB2IP,COL4A3,PTPRM	2.03579	0.650115	17	34
PID_AVB3_INTEGRIN_PATHWAY%MSIGDB_C2%PID_AVB3_INTEGRIN_PATHWAY	PID_AVB3_INTEGRIN_PATHWAY%MSIGDB_C2%PID_AVB3_INTEGRIN_PATHWAY	0.000189573	0.0034844	1	IGF1R,COL12A1,COL16A1,COL4A1,COL4A6,ITGB3,COL6A1,COL3A1,COL8A1,ITGAV,COL14A1,COL1A2,TLN1,CBL,COL1A1,ROCK1,PXN,PTPN11,COL4A3	2.26897	0.729062	19	33
RHOF GTPASE CYCLE%REACTOME DATABASE ID RELEASE 81%9035034	RHOF GTPASE CYCLE%REACTOME DATABASE ID RELEASE 81%9035034	0.000190042	0.0034844	1	MCAM,ACTN1,FARP1,ARHGAP1,CAV1,LMNB1,TMPO,SNAP23,VAMP3,DIAPH2,MYO9B,ACTB,AKAP12	2.03119	0.675758	13	28
ASSEMBLY OF COLLAGEN FIBRILS AND OTHER MULTIMERIC STRUCTURES%REACTOME DATABASE ID RELEASE 81%2022090	ASSEMBLY OF COLLAGEN FIBRILS AND OTHER MULTIMERIC STRUCTURES%REACTOME DATABASE ID RELEASE 81%2022090	0.000190042	0.0034844	1	ITGB4,COL4A1,COL4A2,COL6A1,COL18A1,COL3A1,COL6A3,COL6A2,COL8A1,LOXL1,COL5A1,LOXL2,COL1A2,COL1A1,LAMA3,PXDN,COL4A3,LOXL3,ITGA6,PCOLCE,PLEC,COL5A3	2.32418	0.773231	22	28
NCAM SIGNALING FOR NEURITE OUT-GROWTH%REACTOME DATABASE ID RELEASE 81%375165	NCAM SIGNALING FOR NEURITE OUT-GROWTH%REACTOME DATABASE ID RELEASE 81%375165	0.000190042	0.0034844	1	SPTA1,FYN,COL4A1,COL4A2,AGRN,COL6A1,COL6A3,SPTBN1,COL6A2,PTPRA,SPTAN1,COL4A3	2.00873	0.668283	12	28
NON-INTEGRIN MEMBRANE-ECM INTERACTIONS%REACTOME DATABASE ID RELEASE 81%3000171	NON-INTEGRIN MEMBRANE-ECM INTERACTIONS%REACTOME DATABASE ID RELEASE 81%3000171	0.000190585	0.0034844	1	ACTN1,DAG1,ITGB4,SDC2,DMD,LAMB2,CASK,TGFB1,LAMA5,AGRN,HSPG2,ITGB3,ITGB5,ITGAV,LAMA2,LAMA3,ITGB1,LAMA4,ITGA6,NTN4,DDR1,LAMC1,LAMC3	2.28045	0.747233	23	30
ELASTIC FIBRE FORMATION%REACTOME DATABASE ID RELEASE 81%1566948	ELASTIC FIBRE FORMATION%REACTOME DATABASE ID RELEASE 81%1566948	0.000191095	0.0034844	1	MFAP5,TGFB2,TGFB1,LTBP1,LTBP2,ITGB3,ELN,ITGB5,LTBP4,MFAP2,LOXL1,ITGAV,LOXL2,LTBP3,MFAP4,ITGB1,TGFB3,FBN2,FBLN2,FBLN5,LOXL3,EFEMP1	2.40552	0.814454	22	26
SYNDECAN INTERACTIONS%REACTOME DATABASE ID RELEASE 81%3000170	SYNDECAN INTERACTIONS%REACTOME DATABASE ID RELEASE 81%3000170	0.000191168	0.0034844	1	ACTN1,ITGB4,SDC2,CASK,TGFB1,ITGB3,ITGB5,ITGAV,ITGB1,ITGA6	2.02737	0.785272	10	15
PROTEIN-PROTEIN INTERACTIONS AT SYNAPSES%REACTOME%R-HSA-6794362.4	PROTEIN-PROTEIN INTERACTIONS AT SYNAPSES%REACTOME%R-HSA-6794362.4	0.000191718	0.0034844	1	CASK,DBNL,EPB41L1,DLG3,FLOT2,DLGAP4,HOMER1,PPFIA4,HOMER2,STX1A,FLOT1,RTN3,HOMER3,EPB41L2,PPFIA1,DLG1	2.04806	0.701027	16	25
DISEASES ASSOCIATED WITH GLYCOSAMINOGLYCAN METABOLISM%REACTOME DATABASE ID RELEASE 81%3560782	DISEASES ASSOCIATED WITH GLYCOSAMINOGLYCAN METABOLISM%REACTOME DATABASE ID RELEASE 81%3560782	0.000191865	0.0034844	1	SDC2,AGRN,HSPG2,BGN,VCAN,FMOD,OGN,EXT2,PRELP,LUM,DCN,B3GALT6,OMD	2.03435	0.708686	13	23
SYNDECAN-1-MEDIATED SIGNALING EVENTS%PATHWAY INTERACTION DATABASE NCI-NATURE CURATED DATA%SYNDECAN-1-MEDIATED SIGNALING EVENTS	SYNDECAN-1-MEDIATED SIGNALING EVENTS%PATHWAY INTERACTION DATABASE NCI-NATURE CURATED DATA%SYNDECAN-1-MEDIATED SIGNALING EVENTS	0.000192049	0.0034844	1	COL4A1,CASK,TGFB1,LAMA5,COL4A6,COL6A1,COL3A1,COL6A3,COL6A2,COL5A1,COL1A2,COL1A1,COL4A3,COL5A2,BSG,MAPK1	2.12803	0.765921	16	20
POSITIVE REGULATION OF CELL-SUBSTRATE JUNCTION ORGANIZATION%GOBP%GO:0150117	POSITIVE REGULATION OF CELL-SUBSTRATE JUNCTION ORGANIZATION%GOBP%GO:0150117	0.000192049	0.0034844	1	COL16A1,NRP1,THY1,MAPRE2,MAP4K4,ROCK1,HRG,LIMS1,FERMT2,IQSEC1,MYOC,ARF6	1.97009	0.709075	12	20
COLLAGEN CHAIN TRIMERIZATION%REACTOME%R-HSA-8948216.3	COLLAGEN CHAIN TRIMERIZATION%REACTOME%R-HSA-8948216.3	0.000193311	0.0034844	1	COL22A1,COL12A1,COL16A1,COL4A1,COL4A2,COL4A6,COL6A1,COL18A1,COL3A1,COL6A3,COL6A2,COL8A1,COL5A1,COL14A1,COL1A2,COL1A1	2.21562	0.781761	16	22
CALCIUM ION TRANSMEMBRANE IMPORT INTO CYTOSOL%GOBP%GO:0097553	CALCIUM ION TRANSMEMBRANE IMPORT INTO CYTOSOL%GOBP%GO:0097553	0.000193311	0.0034844	1	TRPV2,CACNA2D1,PKD2,FLNA,ITPR1,ATP2B4,TRDN,JPH2	2.1452	0.756914	8	22
COLLAGEN FIBRIL ORGANIZATION%GOBP%GO:0030199	COLLAGEN FIBRIL ORGANIZATION%GOBP%GO:0030199	0.000193311	0.0034844	1	TGFB2,COL12A1,DPT,COL3A1,LUM,LOXL1,COL5A1,LOXL2,COL14A1,COL1A2,COL1A1,COLGALT1,PXDN,LOXL3,COL5A3	2.03789	0.719049	15	22
PID_SYNDECAN_1_PATHWAY%MSIGDB_C2%PID_SYNDECAN_1_PATHWAY	PID_SYNDECAN_1_PATHWAY%MSIGDB_C2%PID_SYNDECAN_1_PATHWAY	0.000193498	0.0034844	1	COL12A1,COL16A1,COL4A1,CASK,TGFB1,LAMA5,COL4A6,COL6A1,COL3A1,COL8A1,COL14A1,COL1A2,COL1A1	2.19751	0.802529	13	19
LAMININ INTERACTIONS%REACTOME DATABASE ID RELEASE 81%3000157	LAMININ INTERACTIONS%REACTOME DATABASE ID RELEASE 81%3000157	0.000193498	0.0034844	1	ITGB4,LAMB2,LAMA5,HSPG2,ITGA1,COL18A1,NID2,ITGAV,LAMA2,LAMA3,ITGB1,ITGA7,LAMA4,NID1,ITGA6	2.10138	0.767424	15	19
MOLECULES ASSOCIATED WITH ELASTIC FIBRES%REACTOME DATABASE ID RELEASE 81%2129379	MOLECULES ASSOCIATED WITH ELASTIC FIBRES%REACTOME DATABASE ID RELEASE 81%2129379	0.000193498	0.0034844	1	MFAP5,TGFB2,TGFB1,LTBP1,LTBP2,ITGB3,ITGB5,LTBP4,MFAP2,ITGAV,LTBP3,MFAP4,ITGB1,TGFB3,FBLN2,FBLN5,EFEMP1	2.28328	0.833852	17	19
ACETYL-COA METABOLIC PROCESS%GOBP%GO:0006084	ACETYL-COA METABOLIC PROCESS%GOBP%GO:0006084	0.000206868	0.0034844	-1	PMVK,ACACB,MVD,ACAT1,MVK,HMGCS2,ACSS2	-1.95885	-0.702282	7	19
BRANCHED-CHAIN AMINO ACID CATABOLISM%REACTOME%R-HSA-70895.4	BRANCHED-CHAIN AMINO ACID CATABOLISM%REACTOME%R-HSA-70895.4	0.000208551	0.0034844	-1	ALDH6A1,ACAT1,BCKDHB,MCCC2,BCAT2,ECHS1,HIBADH,BCKDHA,AUH,ACAD8,PPM1K,BCKDK	-1.96768	-0.700447	12	20
UBIQUITINâ€“PROTEASOME PATHWAY%SMPDB%SMP0063816	UBIQUITINâ€“PROTEASOME PATHWAY%SMPDB%SMP0063816	0.000208855	0.0034844	-1	PSMA4,PSMB6,PSMA1,PSMB3,PSMA7,PSMB4,PSMC2,PSMB7,PSMA6,PSMB2,PSMA2,PSMA3,PSMC1	-2.16861	-0.735141	13	24
OXIDATIVE PHOSPHORYLATION%WIKIPATHWAYS_20220510%WP623%HOMO SAPIENS	OXIDATIVE PHOSPHORYLATION%WIKIPATHWAYS_20220510%WP623%HOMO SAPIENS	0.000211104	0.0034844	-1	ATP5H,NDUFA10,NDUFB7,NDUFA6,NDUFAB1,NDUFV2,ATP5J,NDUFA5,NDUFA4,NDUFB9,NDUFS3,NDUFA11,ATP6AP2,NDUFA9,NDUFS6,NDUFS1,NDUFS8,NDUFS4,NDUFB6,NDUFC2,NDUFV1,NDUFB8,NDUFB4,NDUFA2,NDUFS5	-2.00381	-0.632617	25	32
PYRUVATE METABOLIC PROCESS%GOBP%GO:0006090	PYRUVATE METABOLIC PROCESS%GOBP%GO:0006090	0.000211775	0.0034844	-1	ENO3,PCK2,HK3,ME3,GPI,ALDOC,FOXK2,ALDOA,PFKM,PFKFB1,LDHB,ENO1,LDHA,PGAM2,TPI1,ME1	-2.00728	-0.610887	16	37
MITOCHONDRIAL ELECTRON TRANSPORT, NADH TO UBIQUINONE%GOBP%GO:0006120	MITOCHONDRIAL ELECTRON TRANSPORT, NADH TO UBIQUINONE%GOBP%GO:0006120	0.000213402	0.0034844	-1	NDUFS7,NDUFA10,NDUFB7,NDUFA6,NDUFAB1,NDUFV2,NDUFB3,NDUFA5,NDUFA4,NDUFB9,NDUFS3,MT-ND1,NDUFA9,NDUFS6,NDUFS1,NDUFS8,NDUFS4,NDUFB6,NDUFC2,NDUFS2,NDUFV1,NDUFB8,NDUFAF1,NDUFB4,NDUFA2,NDUFS5,NDUFA1	-1.96972	-0.592699	27	39
UBIQUITIN MEDIATED DEGRADATION OF PHOSPHORYLATED CDC25A%REACTOME%R-HSA-69601.3	UBIQUITIN MEDIATED DEGRADATION OF PHOSPHORYLATED CDC25A%REACTOME%R-HSA-69601.3	0.000213721	0.0034844	-1	PSME2,PSMA4,PSME1,PSMD14,PSMB6,PSMA1,PSMB3,PSMA7,PSMB4,PSMC2,PSMB7,PSMA6,PSMB2,PSMA2,PSMD7,PSMB8,PSMA3,PSMD5,PSMC1	-2.24362	-0.661304	19	43
SARS-COV-2 MODULATES HOST TRANSLATION MACHINERY%REACTOME%R-HSA-9754678.1	SARS-COV-2 MODULATES HOST TRANSLATION MACHINERY%REACTOME%R-HSA-9754678.1	0.000213721	0.0034844	-1	RPS15A,RPS13,SNRPG,RPS18,RPS9,RPS16,RPS7,SNRPD3,RPS4X,SNRPF,RPS17,RPS12,RPS3,RPS20,RPS24,RPS27,SNRPE,RPSA,RPS21,GEMIN6,RPS15,RPS2,RPS29,RPS5	-2.03794	-0.600681	24	43
REGULATION OF ORNITHINE DECARBOXYLASE (ODC)%REACTOME DATABASE ID RELEASE 81%350562	REGULATION OF ORNITHINE DECARBOXYLASE (ODC)%REACTOME DATABASE ID RELEASE 81%350562	0.000213721	0.0034844	-1	PSME2,PSMA4,PSME1,PSMD14,PSMB6,PSMA1,PSMB3,PSMA7,PSMB4,PSMC2,PSMB7,PSMA6,PSMB2,PSMA2,PSMD7,PSMB8,PSMA3,PSMD5,NQO1,PSMC1	-2.27095	-0.669361	20	43
P53-INDEPENDENT G1 S DNA DAMAGE CHECKPOINT%REACTOME%R-HSA-69613.2	P53-INDEPENDENT G1 S DNA DAMAGE CHECKPOINT%REACTOME%R-HSA-69613.2	0.000213721	0.0034844	-1	PSME2,PSMA4,PSME1,PSMD14,PSMB6,PSMA1,PSMB3,PSMA7,PSMB4,PSMC2,PSMB7,PSMA6,PSMB2,PSMA2,PSMD7,PSMB8,PSMA3,PSMD5,PSMC1	-2.24362	-0.661304	19	43
P53-INDEPENDENT DNA DAMAGE RESPONSE%REACTOME%R-HSA-69610.4	P53-INDEPENDENT DNA DAMAGE RESPONSE%REACTOME%R-HSA-69610.4	0.000213721	0.0034844	-1	PSME2,PSMA4,PSME1,PSMD14,PSMB6,PSMA1,PSMB3,PSMA7,PSMB4,PSMC2,PSMB7,PSMA6,PSMB2,PSMA2,PSMD7,PSMB8,PSMA3,PSMD5,PSMC1	-2.24362	-0.661304	19	43
REGULATION OF ACTIVATED PAK-2P34 BY PROTEASOME MEDIATED DEGRADATION%REACTOME%R-HSA-211733.1	REGULATION OF ACTIVATED PAK-2P34 BY PROTEASOME MEDIATED DEGRADATION%REACTOME%R-HSA-211733.1	0.000215564	0.0034844	-1	PSME2,PSMA4,PSME1,PSMD14,PSMB6,PSMA1,PSMB3,PSMA7,PSMB4,PSMC2,PSMB7,PSMA6,PSMB2,PSMA2,PSMD7,PSMB8,PSMA3,PAK2,PSMD5,PSMC1	-2.26944	-0.66657	20	44
REGULATION OF RUNX3 EXPRESSION AND ACTIVITY%REACTOME DATABASE ID RELEASE 81%8941858	REGULATION OF RUNX3 EXPRESSION AND ACTIVITY%REACTOME DATABASE ID RELEASE 81%8941858	0.000215564	0.0034844	-1	PSME2,PSMA4,PSME1,PSMD14,PSMB6,PSMA1,PSMB3,PSMA7,PSMB4,PSMC2,PSMB7,PSMA6,PSMB2,PSMA2,PSMD7,PSMB8,PSMA3,PSMD5	-2.07886	-0.610594	18	44
STABILIZATION OF P53%REACTOME%R-HSA-69541.5	STABILIZATION OF P53%REACTOME%R-HSA-69541.5	0.000215564	0.0034844	-1	PSME2,PSMA4,PSME1,PSMD14,PSMB6,PSMA1,PSMB3,PSMA7,PSMB4,PSMC2,PSMB7,PSMA6,PSMB2,PSMA2,PSMD7,PSMB8,PSMA3,PSMD5,PSMC1	-2.24704	-0.659991	19	44
VPU MEDIATED DEGRADATION OF CD4%REACTOME%R-HSA-180534.1	VPU MEDIATED DEGRADATION OF CD4%REACTOME%R-HSA-180534.1	0.000215564	0.0034844	-1	PSME2,PSMA4,PSME1,PSMD14,PSMB6,PSMA1,PSMB3,PSMA7,PSMB4,PSMC2,PSMB7,PSMA6,PSMB2,PSMA2,PSMD7,PSMB8,PSMA3,PSMD5,PSMC1	-2.23835	-0.657438	19	44
CROSS-PRESENTATION OF SOLUBLE EXOGENOUS ANTIGENS (ENDOSOMES)%REACTOME%R-HSA-1236978.1	CROSS-PRESENTATION OF SOLUBLE EXOGENOUS ANTIGENS (ENDOSOMES)%REACTOME%R-HSA-1236978.1	0.000215564	0.0034844	-1	PSME2,PSMA4,PSME1,PSMD14,PSMB6,PSMA1,PSMB3,PSMA7,PSMB4,PSMC2,PSMB7,PSMA6,MRC1,PSMB2,PSMA2,PSMD7,PSMB8,PSMA3,PSMD5	-2.2023	-0.64685	19	44
DEGRADATION OF AXIN%REACTOME%R-HSA-4641257.2	DEGRADATION OF AXIN%REACTOME%R-HSA-4641257.2	0.000215564	0.0034844	-1	PSME2,PSMA4,PSME1,PSMD14,PSMB6,PSMA1,PSMB3,PSMA7,PSMB4,PSMC2,PSMB7,PSMA6,PSMB2,PSMA2,PSMD7,PSMB8,PSMA3,PSMD5,PSMC1	-2.23338	-0.655978	19	44
AUTODEGRADATION OF THE E3 UBIQUITIN LIGASE COP1%REACTOME DATABASE ID RELEASE 81%349425	AUTODEGRADATION OF THE E3 UBIQUITIN LIGASE COP1%REACTOME DATABASE ID RELEASE 81%349425	0.000215564	0.0034844	-1	PSME2,PSMA4,PSME1,PSMD14,PSMB6,PSMA1,PSMB3,PSMA7,PSMB4,PSMC2,PSMB7,PSMA6,PSMB2,PSMA2,PSMD7,PSMB8,PSMA3,PSMD5,PSMC1	-2.24704	-0.659991	19	44
P53-DEPENDENT G1 S DNA DAMAGE CHECKPOINT%REACTOME%R-HSA-69580.3	P53-DEPENDENT G1 S DNA DAMAGE CHECKPOINT%REACTOME%R-HSA-69580.3	0.00021645	0.0034844	-1	PSME2,PSMA4,PSME1,PSMD14,PSMB6,PSMA1,CDK2,PSMB3,PSMA7,PSMB4,PSMC2,PSMB7,PSMA6,PSMB2,PSMA2,PSMD7,PSMB8,PSMA3,PSMD5	-2.25738	-0.654078	19	47
G1 S DNA DAMAGE CHECKPOINTS%REACTOME%R-HSA-69615.2	G1 S DNA DAMAGE CHECKPOINTS%REACTOME%R-HSA-69615.2	0.00021645	0.0034844	-1	PSME2,PSMA4,PSME1,PSMD14,PSMB6,PSMA1,CDK2,PSMB3,PSMA7,PSMB4,PSMC2,PSMB7,PSMA6,PSMB2,PSMA2,PSMD7,PSMB8,PSMA3,PSMD5	-2.25738	-0.654078	19	47
HH MUTANTS ABROGATE LIGAND SECRETION%REACTOME%R-HSA-5387390.4	HH MUTANTS ABROGATE LIGAND SECRETION%REACTOME%R-HSA-5387390.4	0.00021645	0.0034844	-1	PSME2,PSMA4,PSME1,PSMD14,PSMB6,PSMA1,PSMB3,PSMA7,PSMB4,PSMC2,PSMB7,PSMA6,PSMB2,PSMA2,PSMD7,PSMB8,PSMA3,PSMD5,PSMC1	-2.20147	-0.63788	19	47
P53-DEPENDENT G1 DNA DAMAGE RESPONSE%REACTOME%R-HSA-69563.3	P53-DEPENDENT G1 DNA DAMAGE RESPONSE%REACTOME%R-HSA-69563.3	0.00021645	0.0034844	-1	PSME2,PSMA4,PSME1,PSMD14,PSMB6,PSMA1,CDK2,PSMB3,PSMA7,PSMB4,PSMC2,PSMB7,PSMA6,PSMB2,PSMA2,PSMD7,PSMB8,PSMA3,PSMD5	-2.25738	-0.654078	19	47
FBXL7 DOWN-REGULATES AURKA DURING MITOTIC ENTRY AND IN EARLY MITOSIS%REACTOME DATABASE ID RELEASE 81%8854050	FBXL7 DOWN-REGULATES AURKA DURING MITOTIC ENTRY AND IN EARLY MITOSIS%REACTOME DATABASE ID RELEASE 81%8854050	0.00021645	0.0034844	-1	PSME2,PSMA4,PSME1,PSMD14,PSMB6,PSMA1,PSMB3,PSMA7,PSMB4,PSMC2,PSMB7,PSMA6,PSMB2,PSMA2,PSMD7,PSMB8,PSMA3,PSMD5,FBXL18,PSMC1	-2.20436	-0.638718	20	47
SCF(SKP2)-MEDIATED DEGRADATION OF P27 P21%REACTOME%R-HSA-187577.3	SCF(SKP2)-MEDIATED DEGRADATION OF P27 P21%REACTOME%R-HSA-187577.3	0.00021645	0.0034844	-1	PSME2,PSMA4,PSME1,PSMD14,PSMB6,PSMA1,CDK2,PSMB3,PSMA7,PSMB4,PSMC2,PSMB7,PSMA6,PSMB2,PSMA2,PSMD7,PSMB8,PSMA3,PSMD5	-2.15252	-0.623697	19	47
AUF1 (HNRNP D0) BINDS AND DESTABILIZES MRNA%REACTOME DATABASE ID RELEASE 81%450408	AUF1 (HNRNP D0) BINDS AND DESTABILIZES MRNA%REACTOME DATABASE ID RELEASE 81%450408	0.00021645	0.0034844	-1	PSME2,PSMA4,PSME1,PSMD14,PSMB6,PSMA1,PSMB3,PSMA7,PSMB4,PSMC2,PSMB7,PSMA6,PSMB2,PSMA2,PSMD7,PSMB8,PSMA3,PSMD5,PSMC1	-2.2159	-0.642061	19	47
HH MUTANTS ARE DEGRADED BY ERAD%REACTOME DATABASE ID RELEASE 81%5362768	HH MUTANTS ARE DEGRADED BY ERAD%REACTOME DATABASE ID RELEASE 81%5362768	0.00021645	0.0034844	-1	PSME2,PSMA4,PSME1,PSMD14,PSMB6,PSMA1,PSMB3,PSMA7,PSMB4,PSMC2,PSMB7,PSMA6,PSMB2,PSMA2,PSMD7,PSMB8,PSMA3,PSMD5,PSMC1	-2.20147	-0.63788	19	47
NEGATIVE REGULATION OF NOTCH4 SIGNALING%REACTOME%R-HSA-9604323.1	NEGATIVE REGULATION OF NOTCH4 SIGNALING%REACTOME%R-HSA-9604323.1	0.00021645	0.0034844	-1	PSME2,PSMA4,PSME1,PSMD14,PSMB6,PSMA1,PSMB3,PSMA7,PSMB4,PSMC2,PSMB7,PSMA6,PSMB2,PSMA2,PSMD7,PSMB8,PSMA3,PSMD5,PSMC1	-2.15756	-0.625157	19	47
REGULATION OF APOPTOSIS%REACTOME%R-HSA-169911.2	REGULATION OF APOPTOSIS%REACTOME%R-HSA-169911.2	0.00021645	0.0034844	-1	PSME2,PSMA4,PSME1,PSMD14,PSMB6,PSMA1,PSMB3,PSMA7,PSMB4,PSMC2,PSMB7,PSMA6,PSMB2,PSMA2,PSMD7,PSMB8,PSMA3,PAK2,PSMD5,PSMC1	-2.28263	-0.661395	20	47
HEXOSE METABOLIC PROCESS%GOBP%GO:0019318	HEXOSE METABOLIC PROCESS%GOBP%GO:0019318	0.00021645	0.0034844	-1	PCK2,HK3,GPI,ALDOC,FOXK2,ALDOA,FUCA1,DCXR,PFKM,PFKFB1,ENO1,GALK1,GALT,ADIPOQ,RBP4,TPI1,AKR1B1,GALK2,GDPGP1	-1.98485	-0.575112	19	47
AUTODEGRADATION OF CDH1 BY CDH1:APC C%REACTOME%R-HSA-174084.4	AUTODEGRADATION OF CDH1 BY CDH1:APC C%REACTOME%R-HSA-174084.4	0.00021692	0.0034844	-1	PSME2,PSMA4,PSME1,PSMD14,PSMB6,PSMA1,PSMB3,PSMA7,PSMB4,PSMC2,PSMB7,PSMA6,PSMB2,PSMA2,PSMD7,PSMB8,PSMA3,PSMD5,PSMC1	-2.17271	-0.627084	19	48
METABOLISM OF POLYAMINES%REACTOME DATABASE ID RELEASE 81%351202	METABOLISM OF POLYAMINES%REACTOME DATABASE ID RELEASE 81%351202	0.000216967	0.0034844	-1	PSME2,PSMA4,PSME1,PSMD14,PSMB6,PSMA1,PSMB3,PSMA7,PSMB4,PSMC2,PSMB7,PSMA6,PSMB2,PSMA2,PSMD7,PSMB8,PSMA3,PSMD5,NQO1,PSMC1	-2.20761	-0.645807	20	45
UBIQUITIN-DEPENDENT DEGRADATION OF CYCLIN D%REACTOME%R-HSA-75815.3	UBIQUITIN-DEPENDENT DEGRADATION OF CYCLIN D%REACTOME%R-HSA-75815.3	0.000216967	0.0034844	-1	PSME2,PSMA4,PSME1,PSMD14,PSMB6,PSMA1,PSMB3,PSMA7,PSMB4,PSMC2,PSMB7,PSMA6,PSMB2,PSMA2,PSMD7,PSMB8,PSMA3,PSMD5,PSMC1	-2.1466	-0.627958	19	45
SCF-BETA-TRCP MEDIATED DEGRADATION OF EMI1%REACTOME DATABASE ID RELEASE 81%174113	SCF-BETA-TRCP MEDIATED DEGRADATION OF EMI1%REACTOME DATABASE ID RELEASE 81%174113	0.000216967	0.0034844	-1	PSME2,PSMA4,PSME1,PSMD14,PSMB6,PSMA1,PSMB3,PSMA7,PSMB4,PSMC2,PSMB7,PSMA6,PSMB2,PSMA2,PSMD7,PSMB8,PSMA3,PSMD5,PSMC1	-2.21226	-0.647167	19	45
VIF-MEDIATED DEGRADATION OF APOBEC3G%REACTOME DATABASE ID RELEASE 81%180585	VIF-MEDIATED DEGRADATION OF APOBEC3G%REACTOME DATABASE ID RELEASE 81%180585	0.000216967	0.0034844	-1	PSME2,PSMA4,PSME1,PSMD14,PSMB6,PSMA1,PSMB3,PSMA7,PSMB4,PSMC2,PSMB7,PSMA6,PSMB2,PSMA2,PSMD7,PSMB8,PSMA3,PSMD5,PSMC1	-2.2066	-0.64551	19	45
DEGRADATION OF DVL%REACTOME DATABASE ID RELEASE 81%4641258	DEGRADATION OF DVL%REACTOME DATABASE ID RELEASE 81%4641258	0.000217155	0.0034844	-1	PSME2,PSMA4,PSME1,PSMD14,PSMB6,PSMA1,PSMB3,PSMA7,PSMB4,PSMC2,PSMB7,PSMA6,PSMB2,PSMA2,PSMD7,PSMB8,PSMA3,PSMD5	-2.12272	-0.617981	18	46
THE ROLE OF GTSE1 IN G2 M PROGRESSION AFTER G2 CHECKPOINT%REACTOME DATABASE ID RELEASE 81%8852276	THE ROLE OF GTSE1 IN G2 M PROGRESSION AFTER G2 CHECKPOINT%REACTOME DATABASE ID RELEASE 81%8852276	0.000217155	0.0034844	-1	PSME2,PSMA4,PSME1,PSMD14,PSMB6,PSMA1,PSMB3,PSMA7,PSMB4,PSMC2,PSMB7,PSMA6,PSMB2,PSMA2,PSMD7,PSMB8,PSMA3,PSMD5,PSMC1	-2.198	-0.639899	19	46
ASYMMETRIC LOCALIZATION OF PCP PROTEINS%REACTOME%R-HSA-4608870.1	ASYMMETRIC LOCALIZATION OF PCP PROTEINS%REACTOME%R-HSA-4608870.1	0.000217155	0.0034844	-1	PSME2,PSMA4,PSME1,PSMD14,PSMB6,PSMA1,PSMB3,PSMA7,PSMB4,PSMC2,PSMB7,PSMA6,PSMB2,PSMA2,PSMD7,PSMB8,PSMA3,PSMD5	-2.11492	-0.615711	18	46
GSK3B AND BTRC:CUL1-MEDIATED-DEGRADATION OF NFE2L2%REACTOME%R-HSA-9762114.1	GSK3B AND BTRC:CUL1-MEDIATED-DEGRADATION OF NFE2L2%REACTOME%R-HSA-9762114.1	0.000217155	0.0034844	-1	PSME2,PSMA4,PSME1,PSMD14,PSMB6,PSMA1,PSMB3,PSMA7,PSMB4,PSMC2,PSMB7,PSMA6,PSMB2,PSMA2,PSMD7,PSMB8,PSMA3,PSMD5,PSMC1	-2.2017	-0.640974	19	46
RUNX1 REGULATES TRANSCRIPTION OF GENES INVOLVED IN DIFFERENTIATION OF HSCS%REACTOME DATABASE ID RELEASE 81%8939236	RUNX1 REGULATES TRANSCRIPTION OF GENES INVOLVED IN DIFFERENTIATION OF HSCS%REACTOME DATABASE ID RELEASE 81%8939236	0.000217155	0.0034844	-1	PSME2,PSMA4,PSME1,PSMD14,PSMB6,PSMA1,PSMB3,PSMA7,PSMB4,PSMC2,PSMB7,PSMA6,PSMB2,PSMA2,PSMD7,PSMB8,PSMA3,PSMD5,PSMC1	-2.26878	-0.660504	19	46
APC C:CDC20 MEDIATED DEGRADATION OF SECURIN%REACTOME%R-HSA-174154.2	APC C:CDC20 MEDIATED DEGRADATION OF SECURIN%REACTOME%R-HSA-174154.2	0.000217628	0.0034844	-1	PSME2,PSMA4,PSME1,PSMD14,PSMB6,PSMA1,PSMB3,PSMA7,PSMB4,PSMC2,PSMB7,PSMA6,PSMB2,PSMA2,PSMD7,PSMB8,PSMA3,PSMD5	-2.15246	-0.618949	18	49
HEDGEHOG LIGAND BIOGENESIS%REACTOME%R-HSA-5358346.1	HEDGEHOG LIGAND BIOGENESIS%REACTOME%R-HSA-5358346.1	0.000217628	0.0034844	-1	PSME2,PSMA4,PSME1,PSMD14,PSMB6,PSMA1,PSMB3,PSMA7,PSMB4,PSMC2,PSMB7,PSMA6,PSMB2,PSMA2,PSMD7,PSMB8,PSMA3,PSMD5	-2.08258	-0.598856	18	49
APC C:CDH1 MEDIATED DEGRADATION OF CDC20 AND OTHER APC C:CDH1 TARGETED PROTEINS IN LATE MITOSIS EARLY G1%REACTOME%R-HSA-174178.3	APC C:CDH1 MEDIATED DEGRADATION OF CDC20 AND OTHER APC C:CDH1 TARGETED PROTEINS IN LATE MITOSIS EARLY G1%REACTOME%R-HSA-174178.3	0.000217628	0.0034844	-1	PSME2,PSMA4,PSME1,PSMD14,PSMB6,PSMA1,PSMB3,PSMA7,PSMB4,PSMC2,PSMB7,PSMA6,PSMB2,PSMA2,PSMD7,PSMB8,PSMA3,PSMD5	-2.15246	-0.618949	18	49
FORMATION OF THE TERNARY COMPLEX, AND SUBSEQUENTLY, THE 43S COMPLEX%REACTOME%R-HSA-72695.2	FORMATION OF THE TERNARY COMPLEX, AND SUBSEQUENTLY, THE 43S COMPLEX%REACTOME%R-HSA-72695.2	0.000217628	0.0034844	-1	RPS15A,RPS13,RPS18,RPS9,RPS16,RPS7,EIF3I,RPS4X,RPS17,EIF2S1,EIF3F,EIF3M,EIF2S3,RPS12,RPS3,RPS20,RPS24,EIF3J,RPS27,RPSA,RPS21,RPS15,RPS2,RPS29,RPS5,EIF2S2,EIF3D,RPS19	-1.98635	-0.571185	28	49
CYCLIN A:CDK2-ASSOCIATED EVENTS AT S PHASE ENTRY%REACTOME%R-HSA-69656.3	CYCLIN A:CDK2-ASSOCIATED EVENTS AT S PHASE ENTRY%REACTOME%R-HSA-69656.3	0.000217723	0.0034844	-1	PSME2,PSMA4,PSME1,PSMD14,PSMB6,PSMA1,CDK2,PSMB3,PSMA7,PSMB4,PSMC2,PSMB7,PSMA6,PSMB2,PSMA2,PSMD7,PSMB8,PSMA3,PSMD5	-2.08553	-0.586466	19	54
CELLULAR RESPONSE TO HYPOXIA%REACTOME%R-HSA-1234174.3	CELLULAR RESPONSE TO HYPOXIA%REACTOME%R-HSA-1234174.3	0.000217723	0.0034844	-1	PSME2,PSMA4,PSME1,PSMD14,PSMB6,PSMA1,PSMB3,PSMA7,PSMB4,HIF1AN,PSMC2,PSMB7,PSMA6,PSMB2,PSMA2,PSMD7,EGLN1,PSMB8,PSMA3,PSMD5	-1.96733	-0.553227	20	54
HEDGEHOG 'ON' STATE%REACTOME DATABASE ID RELEASE 81%5632684	HEDGEHOG 'ON' STATE%REACTOME DATABASE ID RELEASE 81%5632684	0.000217723	0.0034844	-1	PSME2,ULK3,PSMA4,PSME1,PSMD14,PSMB6,PSMA1,PSMB3,PSMA7,PSMB4,PSMC2,PSMB7,PSMA6,PSMB2,PSMA2,PSMD7,PSMB8,PSMA3,PSMD5	-2.03261	-0.571583	19	54
CYCLIN E ASSOCIATED EVENTS DURING G1 S TRANSITION%REACTOME DATABASE ID RELEASE 81%69202	CYCLIN E ASSOCIATED EVENTS DURING G1 S TRANSITION%REACTOME DATABASE ID RELEASE 81%69202	0.000217723	0.0034844	-1	PSME2,PSMA4,PSME1,PSMD14,PSMB6,PSMA1,CDK2,PSMB3,PSMA7,PSMB4,PSMC2,PSMB7,PSMA6,PSMB2,PSMA2,PSMD7,PSMB8,PSMA3,PSMD5	-2.08553	-0.586466	19	54
COMPLEX I BIOGENESIS%REACTOME DATABASE ID RELEASE 81%6799198	COMPLEX I BIOGENESIS%REACTOME DATABASE ID RELEASE 81%6799198	0.000217723	0.0034844	-1	NDUFS7,NDUFA12,NDUFA10,NDUFB7,NDUFA6,NDUFAB1,NDUFV2,NDUFB3,NDUFA5,TMEM126B,ECSIT,NDUFB9,NDUFS3,NDUFA11,MT-ND1,NUBPL,NDUFA9,NDUFS6,NDUFS1,NDUFS8,NDUFS4,NDUFB6,NDUFC2,NDUFS2,NDUFAF5,NDUFV1,NDUFB8,NDUFAF1,NDUFB4,NDUFA2,NDUFS5,NDUFA1,NDUFAF6	-1.93148	-0.543145	33	54
MONOSACCHARIDE METABOLIC PROCESS%GOBP%GO:0005996	MONOSACCHARIDE METABOLIC PROCESS%GOBP%GO:0005996	0.000217723	0.0034844	-1	PCK2,HK3,GPI,ALDOC,FOXK2,ALDOA,FUCA1,RGN,DCXR,PFKM,PFKFB1,ENO1,FGGY,GALK1,GALT,ADIPOQ,RBP4,TPI1,AKR1B1,GALK2,GDPGP1	-1.94356	-0.546543	21	54
APC C:CDC20 MEDIATED DEGRADATION OF MITOTIC PROTEINS%REACTOME%R-HSA-176409.3	APC C:CDC20 MEDIATED DEGRADATION OF MITOTIC PROTEINS%REACTOME%R-HSA-176409.3	0.000218436	0.0034844	-1	PSME2,PSMA4,PSME1,PSMD14,PSMB6,PSMA1,PSMB3,PSMA7,PSMB4,PSMC2,PSMB7,PSMA6,PSMB2,PSMA2,PSMD7,PSMB8,PSMA3,PSMD5	-2.11621	-0.605895	18	50
CDC20:PHOSPHO-APC C MEDIATED DEGRADATION OF CYCLIN A%REACTOME DATABASE ID RELEASE 81%174184	CDC20:PHOSPHO-APC C MEDIATED DEGRADATION OF CYCLIN A%REACTOME DATABASE ID RELEASE 81%174184	0.000218436	0.0034844	-1	PSME2,PSMA4,PSME1,PSMD14,PSMB6,PSMA1,PSMB3,PSMA7,PSMB4,PSMC2,PSMB7,PSMA6,PSMB2,PSMA2,PSMD7,PSMB8,PSMA3,PSMD5	-2.11621	-0.605895	18	50
ACTIVATION OF APC C AND APC C:CDC20 MEDIATED DEGRADATION OF MITOTIC PROTEINS%REACTOME DATABASE ID RELEASE 81%176814	ACTIVATION OF APC C AND APC C:CDC20 MEDIATED DEGRADATION OF MITOTIC PROTEINS%REACTOME DATABASE ID RELEASE 81%176814	0.000218436	0.0034844	-1	PSME2,PSMA4,PSME1,PSMD14,PSMB6,PSMA1,PSMB3,PSMA7,PSMB4,PSMC2,PSMB7,PSMA6,PSMB2,PSMA2,PSMD7,PSMB8,PSMA3,PSMD5	-2.11621	-0.605895	18	50
OXYGEN-DEPENDENT PROLINE HYDROXYLATION OF HYPOXIA-INDUCIBLE FACTOR ALPHA%REACTOME DATABASE ID RELEASE 81%1234176	OXYGEN-DEPENDENT PROLINE HYDROXYLATION OF HYPOXIA-INDUCIBLE FACTOR ALPHA%REACTOME DATABASE ID RELEASE 81%1234176	0.000218436	0.0034844	-1	PSME2,PSMA4,PSME1,PSMD14,PSMB6,PSMA1,PSMB3,PSMA7,PSMB4,PSMC2,PSMB7,PSMA6,PSMB2,PSMA2,PSMD7,EGLN1,PSMB8,PSMA3,PSMD5	-2.01994	-0.578331	19	50
NIK-->NONCANONICAL NF-KB SIGNALING%REACTOME DATABASE ID RELEASE 81%5676590	NIK-->NONCANONICAL NF-KB SIGNALING%REACTOME DATABASE ID RELEASE 81%5676590	0.000218436	0.0034844	-1	PSME2,PSMA4,PSME1,PSMD14,PSMB6,PSMA1,PSMB3,PSMA7,PSMB4,PSMC2,PSMB7,PSMA6,PSMB2,PSMA2,PSMD7,UBE2M,PSMB8,PSMA3,PSMD5	-1.97655	-0.565909	19	50
DEFECTIVE CFTR CAUSES CYSTIC FIBROSIS%REACTOME DATABASE ID RELEASE 81%5678895	DEFECTIVE CFTR CAUSES CYSTIC FIBROSIS%REACTOME DATABASE ID RELEASE 81%5678895	0.000218436	0.0034844	-1	PSME2,DERL1,PSMA4,PSME1,PSMD14,PSMB6,PSMA1,PSMB3,PSMA7,PSMB4,PSMC2,PSMB7,PSMA6,PSMB2,PSMA2,PSMD7,PSMB8,PSMA3,PSMD5	-2.16427	-0.619653	19	50
CDK-MEDIATED PHOSPHORYLATION AND REMOVAL OF CDC6%REACTOME DATABASE ID RELEASE 81%69017	CDK-MEDIATED PHOSPHORYLATION AND REMOVAL OF CDC6%REACTOME DATABASE ID RELEASE 81%69017	0.000218436	0.0034844	-1	PSME2,PSMA4,PSME1,PSMD14,PSMB6,PSMA1,CDK2,PSMB3,PSMA7,PSMB4,PSMC2,PSMB7,PSMA6,PSMB2,PSMA2,PSMD7,PSMB8,PSMA3,PSMD5	-2.19747	-0.629161	19	50
APC:CDC20 MEDIATED DEGRADATION OF CELL CYCLE PROTEINS PRIOR TO SATISFATION OF THE CELL CYCLE CHECKPOINT%REACTOME DATABASE ID RELEASE 81%179419	APC:CDC20 MEDIATED DEGRADATION OF CELL CYCLE PROTEINS PRIOR TO SATISFATION OF THE CELL CYCLE CHECKPOINT%REACTOME DATABASE ID RELEASE 81%179419	0.000218436	0.0034844	-1	PSME2,PSMA4,PSME1,PSMD14,PSMB6,PSMA1,PSMB3,PSMA7,PSMB4,PSMC2,PSMB7,PSMA6,PSMB2,PSMA2,PSMD7,PSMB8,PSMA3,PSMD5	-2.11621	-0.605895	18	50
ORC1 REMOVAL FROM CHROMATIN%REACTOME%R-HSA-68949.3	ORC1 REMOVAL FROM CHROMATIN%REACTOME%R-HSA-68949.3	0.000218484	0.0034844	-1	PSME2,PSMA4,PSME1,PSMD14,PSMB6,MCM4,PSMA1,CDK2,PSMB3,PSMA7,PSMB4,PSMC2,PSMB7,PSMA6,PSMB2,PSMA2,PSMD7,PSMB8,PSMA3,PSMD5	-2.22056	-0.632233	20	51
DEGRADATION OF GLI2 BY THE PROTEASOME%REACTOME DATABASE ID RELEASE 81%5610783	DEGRADATION OF GLI2 BY THE PROTEASOME%REACTOME DATABASE ID RELEASE 81%5610783	0.000218484	0.0034844	-1	PSME2,PSMA4,PSME1,PSMD14,PSMB6,PSMA1,PSMB3,PSMA7,PSMB4,PSMC2,PSMB7,PSMA6,PSMB2,PSMA2,PSMD7,PSMB8,PSMA3,PSMD5	-2.07971	-0.592131	18	51
DEGRADATION OF GLI1 BY THE PROTEASOME%REACTOME DATABASE ID RELEASE 81%5610780	DEGRADATION OF GLI1 BY THE PROTEASOME%REACTOME DATABASE ID RELEASE 81%5610780	0.000218484	0.0034844	-1	PSME2,PSMA4,PSME1,PSMD14,PSMB6,PSMA1,PSMB3,PSMA7,PSMB4,PSMC2,PSMB7,PSMA6,PSMB2,PSMA2,PSMD7,PSMB8,PSMA3,PSMD5	-2.15171	-0.61263	18	51
DECTIN-1 MEDIATED NONCANONICAL NF-KB SIGNALING%REACTOME DATABASE ID RELEASE 81%5607761	DECTIN-1 MEDIATED NONCANONICAL NF-KB SIGNALING%REACTOME DATABASE ID RELEASE 81%5607761	0.000218484	0.0034844	-1	PSME2,PSMA4,PSME1,PSMD14,PSMB6,PSMA1,PSMB3,PSMA7,PSMB4,PSMC2,PSMB7,PSMA6,PSMB2,PSMA2,PSMD7,UBE2M,PSMB8,PSMA3,PSMD5	-1.95841	-0.557593	19	51
GLI3 IS PROCESSED TO GLI3R BY THE PROTEASOME%REACTOME DATABASE ID RELEASE 81%5610785	GLI3 IS PROCESSED TO GLI3R BY THE PROTEASOME%REACTOME DATABASE ID RELEASE 81%5610785	0.000218484	0.0034844	-1	PSME2,PSMA4,PSME1,PSMD14,PSMB6,PSMA1,PSMB3,PSMA7,PSMB4,PSMC2,PSMB7,PSMA6,PSMB2,PSMA2,PSMD7,PSMB8,PSMA3,PSMD5	-2.07971	-0.592131	18	51
REGULATION OF APC C ACTIVATORS BETWEEN G1 S AND EARLY ANAPHASE%REACTOME DATABASE ID RELEASE 81%176408	REGULATION OF APC C ACTIVATORS BETWEEN G1 S AND EARLY ANAPHASE%REACTOME DATABASE ID RELEASE 81%176408	0.000218723	0.0034844	-1	PSME2,PSMA4,PSME1,PSMD14,PSMB6,PSMA1,CDK2,PSMB3,PSMA7,PSMB4,PSMC2,PSMB7,PSMA6,PSMB2,PSMA2,PSMD7,PSMB8,PSMA3,PSMD5	-2.13969	-0.604836	19	53
APC C-MEDIATED DEGRADATION OF CELL CYCLE PROTEINS%REACTOME DATABASE ID RELEASE 81%174143	APC C-MEDIATED DEGRADATION OF CELL CYCLE PROTEINS%REACTOME DATABASE ID RELEASE 81%174143	0.000218723	0.0034844	-1	PSME2,PSMA4,PSME1,PSMD14,PSMB6,PSMA1,CDK2,PSMB3,PSMA7,PSMB4,PSMC2,PSMB7,PSMA6,PSMB2,PSMA2,PSMD7,PSMB8,PSMA3,PSMD5	-2.13969	-0.604836	19	53
REGULATION OF MITOTIC CELL CYCLE%REACTOME DATABASE ID RELEASE 81%453276	REGULATION OF MITOTIC CELL CYCLE%REACTOME DATABASE ID RELEASE 81%453276	0.000218723	0.0034844	-1	PSME2,PSMA4,PSME1,PSMD14,PSMB6,PSMA1,CDK2,PSMB3,PSMA7,PSMB4,PSMC2,PSMB7,PSMA6,PSMB2,PSMA2,PSMD7,PSMB8,PSMA3,PSMD5	-2.13969	-0.604836	19	53
REGULATION OF RAS BY GAPS%REACTOME%R-HSA-5658442.1	REGULATION OF RAS BY GAPS%REACTOME%R-HSA-5658442.1	0.000218914	0.0034844	-1	PSME2,PSMA4,PSME1,PSMD14,PSMB6,PSMA1,PSMB3,PSMA7,PSMB4,PSMC2,PSMB7,PSMA6,PSMB2,PSMA2,PSMD7,PSMB8,PSMA3,PSMD5,PSMC1,NRAS	-1.97188	-0.559542	20	52
REGULATION OF RUNX2 EXPRESSION AND ACTIVITY%REACTOME DATABASE ID RELEASE 81%8939902	REGULATION OF RUNX2 EXPRESSION AND ACTIVITY%REACTOME DATABASE ID RELEASE 81%8939902	0.000218914	0.0034844	-1	PSME2,PSMA4,PSME1,PSMD14,PSMB6,PSMA1,PSMB3,PSMA7,PSMB4,PSMC2,PSMB7,PSMA6,PSMB2,PSMA2,PSMD7,PSMB8,PSMA3,PSMD5	-2.11589	-0.600406	18	52
DICARBOXYLIC ACID METABOLIC PROCESS%GOBP%GO:0043648	DICARBOXYLIC ACID METABOLIC PROCESS%GOBP%GO:0043648	0.000218914	0.0034844	-1	PM20D2,GLUD2,IDH2,MTHFD2,ME3,GCLM,SHMT1,IDH1,MTHFD2L,AASDHPPT,GLUL,MDH1,SDHAF3,GOT1,FH,FPGS,ALDH1L1,ACOT8,MDH2,ME1,ASS1,ALDH5A1,MTHFS,ASPA	-1.96841	-0.558556	24	52
ACTIVATION OF NF-KAPPAB IN B CELLS%REACTOME%R-HSA-1169091.1	ACTIVATION OF NF-KAPPAB IN B CELLS%REACTOME%R-HSA-1169091.1	0.000219058	0.0034844	-1	PSME2,PSMA4,PSME1,PSMD14,PSMB6,PSMA1,PSMB3,PSMA7,PSMB4,PSMC2,PSMB7,PSMA6,PSMB2,PSMA2,PSMD7,BCL10,PSMB8,PSMA3,PSMD5	-1.91825	-0.537764	19	55
SIGNALING BY NOTCH4%REACTOME DATABASE ID RELEASE 81%9013694	SIGNALING BY NOTCH4%REACTOME DATABASE ID RELEASE 81%9013694	0.000219058	0.0034844	-1	PSME2,PSMA4,PSME1,PSMD14,PSMB6,PSMA1,PSMB3,PSMA7,PSMB4,PSMC2,PSMB7,PSMA6,PSMB2,PSMA2,PSMD7,PSMB8,PSMA3,NOTCH1,PSMD5	-1.87634	-0.526015	19	55
ASSEMBLY OF THE PRE-REPLICATIVE COMPLEX%REACTOME%R-HSA-68867.8	ASSEMBLY OF THE PRE-REPLICATIVE COMPLEX%REACTOME%R-HSA-68867.8	0.000219058	0.0034844	-1	PSME2,PSMA4,PSME1,PSMD14,PSMB6,MCM4,PSMA1,PSMB3,PSMA7,PSMB4,PSMC2,PSMB7,PSMA6,PSMB2,PSMA2,PSMD7,PSMB8,PSMA3,PSMD5	-2.10667	-0.590585	19	55
TRANSCRIPTIONAL REGULATION BY RUNX3%REACTOME DATABASE ID RELEASE 81%8878159	TRANSCRIPTIONAL REGULATION BY RUNX3%REACTOME DATABASE ID RELEASE 81%8878159	0.000219394	0.0034844	-1	PSME2,PSMA4,PSME1,PSMD14,PSMB6,PSMA1,PSMB3,PSMA7,PSMB4,WWTR1,PSMC2,PSMB7,PSMA6,PSMB2,PSMA2,PSMD7,SMAD4,PSMB8,PSMA3,NOTCH1,PSMD5,FOXO3,PSMC1	-2.07799	-0.581045	23	56
RIBOSOMAL SCANNING AND START CODON RECOGNITION%REACTOME DATABASE ID RELEASE 81%72702	RIBOSOMAL SCANNING AND START CODON RECOGNITION%REACTOME DATABASE ID RELEASE 81%72702	0.000219394	0.0034844	-1	RPS15A,EIF4E,EIF5,RPS13,RPS18,RPS9,EIF4A1,RPS16,RPS7,EIF3I,RPS4X,RPS17,EIF2S1,EIF3F,EIF4A2,EIF3M,EIF2S3,RPS12,RPS3,RPS20,RPS24,EIF3J,EIF4B,RPS27,RPSA,RPS21,RPS15,RPS2,RPS29,RPS5,EIF2S2,EIF3D,RPS19	-2.091	-0.584684	33	56
TRANSLATION INITIATION COMPLEX FORMATION%REACTOME%R-HSA-72649.3	TRANSLATION INITIATION COMPLEX FORMATION%REACTOME%R-HSA-72649.3	0.000219394	0.0034844	-1	RPS15A,EIF4E,RPS13,RPS18,RPS9,EIF4A1,RPS16,RPS7,EIF3I,RPS4X,RPS17,EIF2S1,EIF3F,EIF4A2,EIF3M,EIF2S3,RPS12,RPS3,RPS20,RPS24,EIF3J,EIF4B,RPS27,RPSA,RPS21,RPS15,RPS2,RPS29,RPS5,EIF2S2,EIF3D,RPS19	-2.05558	-0.574779	32	56
ABC TRANSPORTER DISORDERS%REACTOME%R-HSA-5619084.5	ABC TRANSPORTER DISORDERS%REACTOME%R-HSA-5619084.5	0.000219394	0.0034844	-1	PSME2,DERL1,PSMA4,PSME1,PSMD14,PSMB6,PSMA1,PSMB3,PSMA7,PSMB4,PSMC2,PSMB7,PSMA6,PSMB2,PSMA2,PSMD7,PSMB8,PSMA3,PSMD5,ABCB6	-2.10379	-0.588259	20	56
ACTIVATION OF THE MRNA UPON BINDING OF THE CAP-BINDING COMPLEX AND EIFS, AND SUBSEQUENT BINDING TO 43S%REACTOME%R-HSA-72662.3	ACTIVATION OF THE MRNA UPON BINDING OF THE CAP-BINDING COMPLEX AND EIFS, AND SUBSEQUENT BINDING TO 43S%REACTOME%R-HSA-72662.3	0.000220119	0.0034844	-1	RPS15A,EIF4E,RPS13,RPS18,RPS9,EIF4A1,RPS16,RPS7,EIF3I,RPS4X,RPS17,EIF2S1,EIF3F,EIF4A2,EIF3M,EIF2S3,RPS12,RPS3,RPS20,RPS24,EIF3J,EIF4B,RPS27,EIF4EBP1,RPSA,RPS21,RPS15,RPS2,RPS29,RPS5,EIF2S2,EIF3D,RPS19	-2.07583	-0.577702	33	57
REGULATION OF PTEN STABILITY AND ACTIVITY%REACTOME DATABASE ID RELEASE 81%8948751	REGULATION OF PTEN STABILITY AND ACTIVITY%REACTOME DATABASE ID RELEASE 81%8948751	0.000220119	0.0034844	-1	PSME2,PSMA4,PSME1,PSMD14,PSMB6,PSMA1,PSMB3,PSMA7,PSMB4,PSMC2,PSMB7,PSMA6,PSMB2,PSMA2,PSMD7,PSMB8,PSMA3,PSMD5,PTEN,PSMC1,NEDD4	-1.90309	-0.529629	21	57
SWITCHING OF ORIGINS TO A POST-REPLICATIVE STATE%REACTOME DATABASE ID RELEASE 81%69052	SWITCHING OF ORIGINS TO A POST-REPLICATIVE STATE%REACTOME DATABASE ID RELEASE 81%69052	0.000220119	0.0034844	-1	PSME2,PSMA4,PSME1,PSMD14,PSMB6,MCM4,PSMA1,CDK2,PSMB3,PSMA7,PSMB4,PSMC2,PSMB7,PSMA6,PSMB2,PSMA2,PSMD7,PSMB8,PSMA3,PSMD5	-2.1471	-0.597537	20	57
SYNTHESIS OF DNA%REACTOME%R-HSA-69239.2	SYNTHESIS OF DNA%REACTOME%R-HSA-69239.2	0.000220119	0.0034844	-1	PSME2,PSMA4,PSME1,PSMD14,PSMB6,MCM4,PSMA1,CDK2,PSMB3,PSMA7,PSMB4,PSMC2,PSMB7,PSMA6,PSMB2,PSMA2,PSMD7,PSMB8,PSMA3,PSMD5,PSMC1,ORC4,PCNA,RBX1,PSMC5,RPA3,PSMD1,PSMB10,CUL1,CDC27,PSMF1,ANAPC5,PSMC3,PSMD12,PSME4,PSMD11	-2.16503	-0.588459	36	64
NUCLEAR EVENTS MEDIATED BY NFE2L2%REACTOME%R-HSA-9759194.1	NUCLEAR EVENTS MEDIATED BY NFE2L2%REACTOME%R-HSA-9759194.1	0.000220119	0.0034844	-1	PSME2,PSMA4,TXNRD1,PSME1,GCLM,IDH1,PSMD14,PSMB6,PSMA1,PGD,PSMB3,PSMA7,PSMB4,PSMC2,PRDX1,PSMB7,PSMA6,PSMB2,PSMA2,PSMD7,TALDO1,PSMB8,PSMA3,NOTCH1,PSMD5,NQO1,ME1,PSMC1,SQSTM1	-2.27925	-0.619506	29	64
FCERI MEDIATED NF-KB ACTIVATION%REACTOME%R-HSA-2871837.2	FCERI MEDIATED NF-KB ACTIVATION%REACTOME%R-HSA-2871837.2	0.000220361	0.0034844	-1	PSME2,PSMA4,PSME1,UBE2V1,UBE2N,PSMD14,PSMB6,PSMA1,PSMB3,PSMA7,PSMB4,PSMC2,PSMB7,PSMA6,PSMB2,PSMA2,PSMD7,BCL10,PSMB8,PSMA3,PSMD5	-1.99659	-0.537825	21	67
DNA REPLICATION%REACTOME%R-HSA-69306.5	DNA REPLICATION%REACTOME%R-HSA-69306.5	0.000220361	0.0034844	-1	PSME2,PSMA4,PSME1,PSMD14,PSMB6,MCM4,PSMA1,CDK2,PSMB3,PSMA7,PSMB4,PSMC2,PSMB7,PSMA6,PSMB2,PSMA2,PSMD7,PSMB8,PSMA3,PSMD5,PSMC1,ORC4,PCNA,RBX1,PSMC5,RPA3,PSMD1,PSMB10,KPNA6,CUL1,CDC27,PSMF1,ANAPC5,PSMC3,PSMD12,PSME4,PSMD11	-2.11853	-0.570674	37	67
GLUCOSE METABOLISM%REACTOME%R-HSA-70326.8	GLUCOSE METABOLISM%REACTOME%R-HSA-70326.8	0.000220361	0.0034844	-1	ENO3,NUP43,PCK2,HK3,GPI,ALDOC,ALDOA,PPP2CA,MDH1,PPP2CB,PFKM,PFKFB1,ENO1,GOT1,PGP,PGAM2,NUP155,TPI1,MDH2	-1.72635	-0.465031	19	67
HEDGEHOG 'OFF' STATE%REACTOME%R-HSA-5610787.1	HEDGEHOG 'OFF' STATE%REACTOME%R-HSA-5610787.1	0.000220459	0.0034844	-1	PSME2,PSMA4,PSME1,PSMD14,PSMB6,PSMA1,PSMB3,PSMA7,PSMB4,PSMC2,PSMB7,PSMA6,PSMB2,PSMA2,PSMD7,DYNC2H1,PSMB8,PSMA3,PSMD5,WDR35,PSMC1	-1.91661	-0.51775	21	66
MAPK6 MAPK4 SIGNALING%REACTOME%R-HSA-5687128.3	MAPK6 MAPK4 SIGNALING%REACTOME%R-HSA-5687128.3	0.000220459	0.0034844	-1	PSME2,PSMA4,PSME1,PSMD14,PSMB6,PSMA1,PSMB3,PSMA7,PSMB4,PSMC2,PSMB7,PSMA6,PSMB2,PSMA2,PSMD7,PSMB8,PSMA3,PAK2,PSMD5,FOXO3,PSMC1	-1.89714	-0.521083	21	61
UCH PROTEINASES%REACTOME DATABASE ID RELEASE 81%5689603	UCH PROTEINASES%REACTOME DATABASE ID RELEASE 81%5689603	0.000220507	0.0034844	-1	PSME2,PSMA4,PSME1,NEDD8,ADRM1,PSMD14,PSMB6,FOXK2,PSMA1,PSMB3,PSMA7,PSMB4,ACTL6A,RUVBL1,PSMC2,PSMB7,PSMA6,PSMB2,PSMA2,PSMD7,PSMB8,PSMA3,SENP8,PSMD5,OGT,PSMC1	-2.19444	-0.608803	26	58
DEGRADATION OF BETA-CATENIN BY THE DESTRUCTION COMPLEX%REACTOME DATABASE ID RELEASE 81%195253	DEGRADATION OF BETA-CATENIN BY THE DESTRUCTION COMPLEX%REACTOME DATABASE ID RELEASE 81%195253	0.000220702	0.0034844	-1	PSME2,PSMA4,PSME1,PSMD14,PSMB6,PSMA1,PSMB3,PSMA7,PSMB4,PPP2CA,PSMC2,PSMB7,PSMA6,PPP2CB,PSMB2,PSMA2,PSMD7,PSMB8,PSMA3,PSMD5,PSMC1,PPP2R5D,PPP2R5C,RBX1,PSMC5,PPP2R1A,PSMD1,PSMB10,CTBP2,PPP2R5E,CUL1,PSMF1,PSMC3,PSMD12,PSME4,PSMD11	-2.09102	-0.576372	36	60
DNA REPLICATION PRE-INITIATION%REACTOME%R-HSA-69002.2	DNA REPLICATION PRE-INITIATION%REACTOME%R-HSA-69002.2	0.000220702	0.0034844	-1	PSME2,PSMA4,PSME1,PSMD14,PSMB6,MCM4,PSMA1,CDK2,PSMB3,PSMA7,PSMB4,PSMC2,PSMB7,PSMA6,PSMB2,PSMA2,PSMD7,PSMB8,PSMA3,PSMD5	-2.12681	-0.586237	20	60
DOWNSTREAM SIGNALING EVENTS OF B CELL RECEPTOR (BCR)%REACTOME DATABASE ID RELEASE 81%1168372	DOWNSTREAM SIGNALING EVENTS OF B CELL RECEPTOR (BCR)%REACTOME DATABASE ID RELEASE 81%1168372	0.000220751	0.0034844	-1	PSME2,PSMA4,PSME1,PSMD14,PSMB6,PSMA1,PSMB3,PSMA7,PSMB4,PSMC2,PSMB7,PSMA6,PSMB2,PSMA2,PSMD7,BCL10,PSMB8,PSMA3,PSMD5,PSMC1,NRAS	-1.89663	-0.519571	21	62
ELECTRON TRANSPORT CHAIN: OXPHOS SYSTEM IN MITOCHONDRIA%WIKIPATHWAYS_20220510%WP111%HOMO SAPIENS	ELECTRON TRANSPORT CHAIN: OXPHOS SYSTEM IN MITOCHONDRIA%WIKIPATHWAYS_20220510%WP111%HOMO SAPIENS	0.000220751	0.0034844	-1	COX17,COX6A2,NDUFA12,ATP5H,UQCRH,UQCRB,NDUFA10,NDUFB7,NDUFA6,UQCRQ,NDUFAB1,NDUFV2,ATP5J,NDUFB3,NDUFA5,NDUFA4,UQCR11,NDUFB9,NDUFS3,UQCRC1,UQCR10,NDUFA9,COX7A1,NDUFS6,NDUFS1,NDUFS8,SLC25A4,NDUFS4,NDUFB6,NDUFC2,NDUFV1,NDUFB8,COX5A,COX7A2L,COX6B1,NDUFB4,NDUFA2,NDUFS5	-1.88705	-0.516946	38	62
AEROBIC RESPIRATION I (CYTOCHROME C)%BIOCYC%PWY-3781	AEROBIC RESPIRATION I (CYTOCHROME C)%BIOCYC%PWY-3781	0.000220946	0.0034844	-1	NDUFS7,NDUFA12,UQCRH,UQCRB,NDUFA10,NDUFB7,NDUFA6,UQCRQ,NDUFAB1,NDUFV2,NDUFB3,NDUFA5,NDUFA4,UQCR11,NDUFB9,NDUFS3,UQCRC1,UQCR10,NDUFA11,MT-ND1,NDUFA9,NDUFS6,NDUFS1,NDUFS8,NDUFS4,NDUFB6,NDUFC2,NDUFS2,NDUFV1,NDUFB8,COX5B,COX5A,COX6B1,NDUFB4,NDUFA2,NDUFS5	-1.7785	-0.476777	36	69
PROTEIN SYNTHESIS: PHENYLALANINE%PATHWHIZ%PW112934	PROTEIN SYNTHESIS: PHENYLALANINE%PATHWHIZ%PW112934	0.000220946	0.0034844	-1	RPS15A,RPS13,RPS18,FARSB,RPS9,RPS16,RPS7,RPS4X,RPS17,RPLP2,RPS12,RPS3,RPS20,RPS24,RPL23,RPS27,RPSA,RPS21,RPS15,RPS2,RPS29,RPS5,RPLP0,RPL18A,RPS19,RPL37,RPL37A,RPL8,RPL34,RPLP1,RPL5,RPS28,RPL27A,RPS11,RPL12,RPL13,RPL29,RPL35A,RPS10,RPL11,RPL10A,RPL6,RPS3A,RPL27,FAU,RPL4,RPL30,RPS25,RPL19	-2.00206	-0.528536	49	75
INTERLEUKIN-1 SIGNALING%REACTOME DATABASE ID RELEASE 81%9020702	INTERLEUKIN-1 SIGNALING%REACTOME DATABASE ID RELEASE 81%9020702	0.000220946	0.0034844	-1	S100B,PSME2,PSMA4,SAA1,MAP2K1,PSME1,UBE2V1,UBE2N,PSMD14,PSMB6,PSMA1,PSMB3,PSMA7,PSMB4,PSMC2,PSMB7,PSMA6,PSMB2,PSMA2,PSMD7,USP14,PSMB8,PSMA3,MAP2K4,PSMD5	-1.99009	-0.525375	25	75
MITOTIC G1 PHASE AND G1 S TRANSITION%REACTOME DATABASE ID RELEASE 81%453279	MITOTIC G1 PHASE AND G1 S TRANSITION%REACTOME DATABASE ID RELEASE 81%453279	0.000220946	0.0034844	-1	PSME2,PSMA4,CDK6,PSME1,PSMD14,PSMB6,MCM4,PSMA1,CDK2,PSMB3,PSMA7,PSMB4,PPP2CA,PSMC2,PSMB7,PSMA6,PPP2CB,PSMB2,PSMA2,PSMD7,PSMB8,PSMA3,PSMD5,PSMC1,DYRK1A,ORC4,PCNA,PPP2R2A,PSMC5,PPP2R1A,RPA3,PSMD1,CDKN1B	-2.01268	-0.531338	33	75
DOWNSTREAM TCR SIGNALING%REACTOME DATABASE ID RELEASE 81%202424	DOWNSTREAM TCR SIGNALING%REACTOME DATABASE ID RELEASE 81%202424	0.000220946	0.0034844	-1	PSME2,PSMA4,PSME1,UBE2V1,UBE2N,PSMD14,PSMB6,PSMA1,PSMB3,PSMA7,PSMB4,PSMC2,PSMB7,PSMA6,PSMB2,PSMA2,PSMD7,BCL10,PSMB8,PSMA3,PSMD5,PTEN	-1.89111	-0.506964	22	69
REGULATION OF MRNA STABILITY BY PROTEINS THAT BIND AU-RICH ELEMENTS%REACTOME%R-HSA-450531.4	REGULATION OF MRNA STABILITY BY PROTEINS THAT BIND AU-RICH ELEMENTS%REACTOME%R-HSA-450531.4	0.000221288	0.0034844	-1	PSME2,PSMA4,PSME1,PSMD14,PSMB6,ZFP36L1,PSMA1,PSMB3,PSMA7,PSMB4,PSMC2,PSMB7,PRKCD,PSMA6,PSMB2,PSMA2,PSMD7,MAPK14,PSMB8,EXOSC3,PSMA3,PSMD5	-2.10386	-0.562281	22	70
TRANSCRIPTIONAL REGULATION BY RUNX2%REACTOME%R-HSA-8878166.2	TRANSCRIPTIONAL REGULATION BY RUNX2%REACTOME%R-HSA-8878166.2	0.000221288	0.0034844	-1	PSME2,LGALS3,PSMA4,PSME1,PSMD14,PSMB6,PSMA1,PSMB3,PSMA7,PSMB4,WWTR1,PSMC2,PSMB7,PSMA6,PSMB2,PSMA2,PSMD7,SMAD4,PSMB8,PSMA3,PSMD5,PSMC1,HDAC6	-2.05572	-0.549415	23	70
G2 M CHECKPOINTS%REACTOME%R-HSA-69481.3	G2 M CHECKPOINTS%REACTOME%R-HSA-69481.3	0.000221288	0.0034844	-1	PSME2,PSMA4,PSME1,UBE2N,PSMD14,PSMB6,MCM4,PSMA1,CDK2,PSMB3,PSMA7,PSMB4,PSMC2,PSMB7,PSMA6,PSMB2,PSMA2,UBE2V2,PSMD7,PSMB8,TP53BP1,PSMA3,PSMD5	-2.12511	-0.567962	23	70
PROTEIN SYNTHESIS: ALANINE%PATHWHIZ%PW101384	PROTEIN SYNTHESIS: ALANINE%PATHWHIZ%PW101384	0.000221337	0.0034844	-1	RPS15A,RPS13,RPS18,RPS9,RPS16,RPS7,RPS4X,RPS17,RPLP2,RPS12,RPS3,RPS20,RPS24,RPL23,RPS27,RPSA,RPS21,RPS15,RPS2,RPS29,RPS5,RPLP0,RPL18A,RPS19,RPL37,RPL37A,RPL8,RPL34,RPLP1,RPL5,RPS28,RPL27A,RPS11,RPL12,RPL13,RPL29,RPL35A,RPS10,RPL11,RPL10A,RPL6,RPS3A,RPL27,FAU,RPL4,RPL30,RPS25,RPL19	-1.98481	-0.526874	48	73
PROTEIN SYNTHESIS: ARGININE%SMPDB%SMP0111853	PROTEIN SYNTHESIS: ARGININE%SMPDB%SMP0111853	0.000221337	0.0034844	-1	RPS15A,RPS13,RPS18,RPS9,RPS16,RPS7,RPS4X,RPS17,RPLP2,RPS12,RPS3,RPS20,RPS24,RPL23,RPS27,RPSA,RPS21,RPS15,RPS2,RPS29,RPS5,RPLP0,RPL18A,RPS19,RPL37,RPL37A,RPL8,RPL34,RPLP1,RPL5,RPS28,RPL27A,RPS11,RPL12,RPL13,RPL29,RPL35A,RPS10,RPL11,RPL10A,RPL6,RPS3A,RPL27,FAU,RPL4,RPL30,RPS25,RPL19	-1.98481	-0.526874	48	73
PROTEIN SYNTHESIS: ASPARAGINE%SMPDB%SMP0111854	PROTEIN SYNTHESIS: ASPARAGINE%SMPDB%SMP0111854	0.000221337	0.0034844	-1	RPS15A,RPS13,RPS18,RPS9,RPS16,RPS7,RPS4X,RPS17,RPLP2,RPS12,RPS3,RPS20,RPS24,RPL23,RPS27,RPSA,RPS21,RPS15,RPS2,RPS29,RPS5,RPLP0,RPL18A,RPS19,RPL37,RPL37A,RPL8,RPL34,RPLP1,RPL5,RPS28,RPL27A,RPS11,RPL12,RPL13,RPL29,RPL35A,RPS10,RPL11,RPL10A,RPL6,RPS3A,RPL27,FAU,RPL4,RPL30,RPS25,RPL19	-1.98481	-0.526874	48	73
PROTEIN SYNTHESIS: ASPARTIC ACID%SMPDB%SMP0111858	PROTEIN SYNTHESIS: ASPARTIC ACID%SMPDB%SMP0111858	0.000221337	0.0034844	-1	RPS15A,RPS13,RPS18,RPS9,RPS16,RPS7,RPS4X,RPS17,RPLP2,RPS12,RPS3,RPS20,RPS24,RPL23,RPS27,RPSA,RPS21,RPS15,RPS2,RPS29,RPS5,RPLP0,RPL18A,RPS19,RPL37,RPL37A,RPL8,RPL34,RPLP1,RPL5,RPS28,RPL27A,RPS11,RPL12,RPL13,RPL29,RPL35A,RPS10,RPL11,RPL10A,RPL6,RPS3A,RPL27,FAU,RPL4,RPL30,RPS25,RPL19	-1.98481	-0.526874	48	73
PROTEIN SYNTHESIS: CYSTEINE%PATHWHIZ%PW112918	PROTEIN SYNTHESIS: CYSTEINE%PATHWHIZ%PW112918	0.000221337	0.0034844	-1	RPS15A,RPS13,RPS18,RPS9,RPS16,RPS7,RPS4X,RPS17,RPLP2,RPS12,RPS3,RPS20,RPS24,RPL23,RPS27,RPSA,RPS21,RPS15,RPS2,RPS29,RPS5,RPLP0,RPL18A,RPS19,RPL37,RPL37A,RPL8,RPL34,RPLP1,RPL5,RPS28,RPL27A,RPS11,RPL12,RPL13,RPL29,RPL35A,RPS10,RPL11,RPL10A,RPL6,RPS3A,RPL27,FAU,RPL4,RPL30,RPS25,RPL19	-1.98481	-0.526874	48	73
PROTEIN SYNTHESIS: GLUTAMINE%SMPDB%SMP0111862	PROTEIN SYNTHESIS: GLUTAMINE%SMPDB%SMP0111862	0.000221337	0.0034844	-1	RPS15A,RPS13,RPS18,RPS9,RPS16,RPS7,RPS4X,RPS17,RPLP2,RPS12,RPS3,RPS20,RPS24,RPL23,RPS27,RPSA,RPS21,RPS15,RPS2,RPS29,RPS5,RPLP0,RPL18A,RPS19,RPL37,RPL37A,RPL8,RPL34,RPLP1,RPL5,RPS28,RPL27A,RPS11,RPL12,RPL13,RPL29,RPL35A,RPS10,RPL11,RPL10A,RPL6,RPS3A,RPL27,FAU,RPL4,RPL30,RPS25,RPL19	-1.98481	-0.526874	48	73
PROTEIN SYNTHESIS: GLUTAMIC ACID%PATHWHIZ%PW112922	PROTEIN SYNTHESIS: GLUTAMIC ACID%PATHWHIZ%PW112922	0.000221337	0.0034844	-1	RPS15A,RPS13,RPS18,RPS9,RPS16,RPS7,RPS4X,RPS17,RPLP2,RPS12,RPS3,RPS20,RPS24,RPL23,RPS27,RPSA,RPS21,RPS15,RPS2,RPS29,RPS5,RPLP0,RPL18A,RPS19,RPL37,RPL37A,RPL8,RPL34,RPLP1,RPL5,RPS28,RPL27A,RPS11,RPL12,RPL13,RPL29,RPL35A,RPS10,RPL11,RPL10A,RPL6,RPS3A,RPL27,FAU,RPL4,RPL30,RPS25,RPL19	-1.98481	-0.526874	48	73
PROTEIN SYNTHESIS: GLYCINE%PATHWHIZ%PW112928	PROTEIN SYNTHESIS: GLYCINE%PATHWHIZ%PW112928	0.000221337	0.0034844	-1	RPS15A,RPS13,RPS18,RPS9,RPS16,RPS7,RPS4X,RPS17,RPLP2,RPS12,RPS3,RPS20,RPS24,RPL23,RPS27,RPSA,RPS21,RPS15,RPS2,RPS29,RPS5,RPLP0,RPL18A,RPS19,RPL37,RPL37A,RPL8,RPL34,RPLP1,RPL5,RPS28,RPL27A,RPS11,RPL12,RPL13,RPL29,RPL35A,RPS10,RPL11,RPL10A,RPL6,RPS3A,RPL27,FAU,RPL4,RPL30,RPS25,RPL19	-1.98481	-0.526874	48	73
PROTEIN SYNTHESIS: HISTIDINE%PATHWHIZ%PW112929	PROTEIN SYNTHESIS: HISTIDINE%PATHWHIZ%PW112929	0.000221337	0.0034844	-1	RPS15A,RPS13,RPS18,RPS9,RPS16,RPS7,RPS4X,RPS17,RPLP2,RPS12,RPS3,RPS20,RPS24,RPL23,RPS27,RPSA,RPS21,RPS15,RPS2,RPS29,RPS5,RPLP0,RPL18A,RPS19,RPL37,RPL37A,RPL8,RPL34,RPLP1,RPL5,RPS28,RPL27A,RPS11,RPL12,RPL13,RPL29,RPL35A,RPS10,RPL11,RPL10A,RPL6,RPS3A,RPL27,FAU,RPL4,RPL30,RPS25,RPL19	-1.98481	-0.526874	48	73
PROTEIN SYNTHESIS: ISOLEUCINE%SMPDB%SMP0111872	PROTEIN SYNTHESIS: ISOLEUCINE%SMPDB%SMP0111872	0.000221337	0.0034844	-1	RPS15A,RPS13,RPS18,RPS9,RPS16,RPS7,RPS4X,RPS17,RPLP2,RPS12,RPS3,RPS20,RPS24,RPL23,RPS27,RPSA,RPS21,RPS15,RPS2,RPS29,RPS5,RPLP0,RPL18A,RPS19,RPL37,RPL37A,RPL8,RPL34,RPLP1,RPL5,RPS28,RPL27A,RPS11,RPL12,RPL13,RPL29,RPL35A,RPS10,RPL11,RPL10A,RPL6,RPS3A,RPL27,FAU,RPL4,RPL30,RPS25,RPL19	-1.98481	-0.526874	48	73
PROTEIN SYNTHESIS: LEUCINE%SMPDB%SMP0111873	PROTEIN SYNTHESIS: LEUCINE%SMPDB%SMP0111873	0.000221337	0.0034844	-1	RPS15A,RPS13,RPS18,RPS9,RPS16,RPS7,RPS4X,RPS17,RPLP2,RPS12,RPS3,RPS20,RPS24,RPL23,RPS27,RPSA,RPS21,RPS15,RPS2,RPS29,RPS5,RPLP0,RPL18A,RPS19,RPL37,RPL37A,RPL8,RPL34,RPLP1,RPL5,RPS28,RPL27A,RPS11,RPL12,RPL13,RPL29,RPL35A,RPS10,RPL11,RPL10A,RPL6,RPS3A,RPL27,FAU,RPL4,RPL30,RPS25,RPL19	-1.98481	-0.526874	48	73
PROTEIN SYNTHESIS: LYSINE%SMPDB%SMP0111874	PROTEIN SYNTHESIS: LYSINE%SMPDB%SMP0111874	0.000221337	0.0034844	-1	RPS15A,RPS13,RPS18,RPS9,RPS16,RPS7,RPS4X,RPS17,RPLP2,RPS12,RPS3,RPS20,RPS24,RPL23,RPS27,RPSA,RPS21,RPS15,RPS2,RPS29,RPS5,RPLP0,RPL18A,RPS19,RPL37,RPL37A,RPL8,RPL34,RPLP1,RPL5,RPS28,RPL27A,RPS11,RPL12,RPL13,RPL29,RPL35A,RPS10,RPL11,RPL10A,RPL6,RPS3A,RPL27,FAU,RPL4,RPL30,RPS25,RPL19	-1.98481	-0.526874	48	73
PROTEIN SYNTHESIS: METHIONINE%PATHWHIZ%PW112933	PROTEIN SYNTHESIS: METHIONINE%PATHWHIZ%PW112933	0.000221337	0.0034844	-1	RPS15A,RPS13,RPS18,RPS9,RPS16,RPS7,RPS4X,RPS17,RPLP2,RPS12,RPS3,RPS20,RPS24,RPL23,RPS27,RPSA,RPS21,RPS15,RPS2,RPS29,RPS5,RPLP0,RPL18A,RPS19,RPL37,RPL37A,RPL8,RPL34,RPLP1,RPL5,RPS28,RPL27A,RPS11,RPL12,RPL13,RPL29,RPL35A,RPS10,RPL11,RPL10A,RPL6,RPS3A,RPL27,FAU,RPL4,RPL30,RPS25,RPL19	-1.98481	-0.526874	48	73
PROTEIN SYNTHESIS: PROLINE%PATHWHIZ%PW113695	PROTEIN SYNTHESIS: PROLINE%PATHWHIZ%PW113695	0.000221337	0.0034844	-1	RPS15A,RPS13,RPS18,RPS9,RPS16,RPS7,RPS4X,RPS17,RPLP2,RPS12,RPS3,RPS20,RPS24,RPL23,RPS27,RPSA,RPS21,RPS15,RPS2,RPS29,RPS5,RPLP0,RPL18A,RPS19,RPL37,RPL37A,RPL8,RPL34,RPLP1,RPL5,RPS28,RPL27A,RPS11,RPL12,RPL13,RPL29,RPL35A,RPS10,RPL11,RPL10A,RPL6,RPS3A,RPL27,FAU,RPL4,RPL30,RPS25,RPL19	-1.98481	-0.526874	48	73
PROTEIN SYNTHESIS: SERINE%PATHWHIZ%PW120517	PROTEIN SYNTHESIS: SERINE%PATHWHIZ%PW120517	0.000221337	0.0034844	-1	RPS15A,RPS13,RPS18,RPS9,RPS16,RPS7,RPS4X,RPS17,RPLP2,RPS12,RPS3,RPS20,RPS24,RPL23,RPS27,RPSA,RPS21,RPS15,RPS2,RPS29,RPS5,RPLP0,RPL18A,RPS19,RPL37,RPL37A,RPL8,RPL34,RPLP1,RPL5,RPS28,RPL27A,RPS11,RPL12,RPL13,RPL29,RPL35A,RPS10,RPL11,RPL10A,RPL6,RPS3A,RPL27,FAU,RPL4,RPL30,RPS25,RPL19	-1.98481	-0.526874	48	73
PROTEIN SYNTHESIS: THREONINE%PATHWHIZ%PW120525	PROTEIN SYNTHESIS: THREONINE%PATHWHIZ%PW120525	0.000221337	0.0034844	-1	RPS15A,RPS13,RPS18,RPS9,RPS16,RPS7,RPS4X,RPS17,RPLP2,RPS12,RPS3,RPS20,RPS24,RPL23,RPS27,RPSA,RPS21,RPS15,RPS2,RPS29,RPS5,RPLP0,RPL18A,RPS19,RPL37,RPL37A,RPL8,RPL34,RPLP1,RPL5,RPS28,RPL27A,RPS11,RPL12,RPL13,RPL29,RPL35A,RPS10,RPL11,RPL10A,RPL6,RPS3A,RPL27,FAU,RPL4,RPL30,RPS25,RPL19	-1.98481	-0.526874	48	73
PROTEIN SYNTHESIS: TRYPTOPHAN%PATHWHIZ%PW120526	PROTEIN SYNTHESIS: TRYPTOPHAN%PATHWHIZ%PW120526	0.000221337	0.0034844	-1	RPS15A,RPS13,RPS18,RPS9,RPS16,RPS7,RPS4X,RPS17,RPLP2,RPS12,RPS3,RPS20,RPS24,RPL23,RPS27,RPSA,RPS21,RPS15,RPS2,RPS29,RPS5,RPLP0,RPL18A,RPS19,RPL37,RPL37A,RPL8,RPL34,RPLP1,RPL5,RPS28,RPL27A,RPS11,RPL12,RPL13,RPL29,RPL35A,RPS10,RPL11,RPL10A,RPL6,RPS3A,RPL27,FAU,RPL4,RPL30,RPS25,RPL19	-1.98481	-0.526874	48	73
PROTEIN SYNTHESIS: TYROSINE%PATHWHIZ%PW120527	PROTEIN SYNTHESIS: TYROSINE%PATHWHIZ%PW120527	0.000221337	0.0034844	-1	RPS15A,RPS13,RPS18,RPS9,RPS16,RPS7,RPS4X,RPS17,RPLP2,RPS12,RPS3,RPS20,RPS24,RPL23,RPS27,RPSA,RPS21,RPS15,RPS2,RPS29,RPS5,RPLP0,RPL18A,RPS19,RPL37,RPL37A,RPL8,RPL34,RPLP1,RPL5,RPS28,RPL27A,RPS11,RPL12,RPL13,RPL29,RPL35A,RPS10,RPL11,RPL10A,RPL6,RPS3A,RPL27,FAU,RPL4,RPL30,RPS25,RPL19	-1.98481	-0.526874	48	73
PROTEIN SYNTHESIS: VALINE%PATHWHIZ%PW120528	PROTEIN SYNTHESIS: VALINE%PATHWHIZ%PW120528	0.000221337	0.0034844	-1	RPS15A,RPS13,RPS18,RPS9,RPS16,RPS7,RPS4X,RPS17,RPLP2,RPS12,RPS3,RPS20,RPS24,RPL23,RPS27,RPSA,RPS21,RPS15,RPS2,RPS29,RPS5,RPLP0,RPL18A,RPS19,RPL37,RPL37A,RPL8,RPL34,RPLP1,RPL5,RPS28,RPL27A,RPS11,RPL12,RPL13,RPL29,RPL35A,RPS10,RPL11,RPL10A,RPL6,RPS3A,RPL27,FAU,RPL4,RPL30,RPS25,RPL19	-1.98481	-0.526874	48	73
PROTEIN SYNTHESIS: ALANINE%PATHWHIZ%PW120529	PROTEIN SYNTHESIS: ALANINE%PATHWHIZ%PW120529	0.000221337	0.0034844	-1	RPS15A,RPS13,RPS18,RPS9,RPL9,RPS16,RPS7,RPS4X,RPS17,RPLP2,RPS12,RPS3,RPS20,RPS24,RPL23,RPS27,RPSA,RPS21,RPS15,RPS2,RPS29,RPS5,RPLP0,RPL18A,RPS19,RPL37,RPL37A,RPL8,RPL34,RPLP1,RPL5,RPS28,RPL27A,RPS11,RPL12,RPL13,RPL29,RPL35A,RPS10,RPL11,RPL10A,RPL6,RPS3A,RPL27,FAU,RPL4,RPL30,RPS25,RPL19	-2.00534	-0.530583	49	74
CLEC7A (DECTIN-1) SIGNALING%REACTOME%R-HSA-5607764.1	CLEC7A (DECTIN-1) SIGNALING%REACTOME%R-HSA-5607764.1	0.000221582	0.0034844	-1	PSME2,PSMA4,PSME1,UBE2V1,UBE2N,PSMD14,PSMB6,PSMA1,PSMB3,PSMA7,PSMB4,PSMC2,PSMB7,PRKCD,PSMA6,PSMB2,PSMA2,PSMD7,UBE2M,BCL10,PSMB8,PSMA3,PSMD5	-1.8654	-0.496806	23	72
ABC-FAMILY PROTEINS MEDIATED TRANSPORT%REACTOME DATABASE ID RELEASE 81%382556	ABC-FAMILY PROTEINS MEDIATED TRANSPORT%REACTOME DATABASE ID RELEASE 81%382556	0.000221582	0.0034844	-1	PSME2,DERL1,PSMA4,PSME1,ABCC5,PSMD14,PSMB6,PSMA1,PSMB3,PSMA7,PSMB4,PSMC2,PSMB7,PSMA6,PSMB2,PSMA2,PSMD7,PSMB8,PSMA3,PSMD5,ABCB6,EIF2S1,EIF2S3,PSMC1	-2.04709	-0.546419	24	71
ATP SYNTHESIS COUPLED ELECTRON TRANSPORT%GOBP%GO:0042773	ATP SYNTHESIS COUPLED ELECTRON TRANSPORT%GOBP%GO:0042773	0.000221582	0.0034844	-1	NDUFS7,COX6A2,NDUFA12,UQCC3,UQCRH,UQCRB,NDUFA10,NDUFB7,NDUFA6,UQCRQ,NDUFAB1,NDUFV2,NDUFB3,NDUFA5,NDUFA4,UQCR11,COA6,NDUFB9,NDUFS3,UQCRC1,UQCR10,MT-ND1,NDUFA9,NDUFS6,NDUFS1,NDUFS8,NDUFS4,NDUFB6,NDUFC2,NDUFS2,NDUFV1,NDUFB8,COX5B,NDUFAF1,COX5A,COX6B1,NDUFB4,NDUFA2,NDUFS5	-1.79518	-0.478104	39	72
MITOCHONDRIAL ATP SYNTHESIS COUPLED ELECTRON TRANSPORT%GOBP%GO:0042775	MITOCHONDRIAL ATP SYNTHESIS COUPLED ELECTRON TRANSPORT%GOBP%GO:0042775	0.000221582	0.0034844	-1	NDUFS7,COX6A2,NDUFA12,UQCC3,UQCRH,UQCRB,NDUFA10,NDUFB7,NDUFA6,UQCRQ,NDUFAB1,NDUFV2,NDUFB3,NDUFA5,NDUFA4,UQCR11,COA6,NDUFB9,NDUFS3,UQCRC1,UQCR10,MT-ND1,NDUFA9,NDUFS6,NDUFS1,NDUFS8,NDUFS4,NDUFB6,NDUFC2,NDUFS2,NDUFV1,NDUFB8,COX5B,NDUFAF1,COX5A,COX6B1,NDUFB4,NDUFA2,NDUFS5	-1.79518	-0.478104	39	72
G1 S TRANSITION%REACTOME%R-HSA-69206.2	G1 S TRANSITION%REACTOME%R-HSA-69206.2	0.000222025	0.0034844	-1	PSME2,PSMA4,PSME1,PSMD14,PSMB6,MCM4,PSMA1,CDK2,PSMB3,PSMA7,PSMB4,PPP2CA,PSMC2,PSMB7,PSMA6,PPP2CB,PSMB2,PSMA2,PSMD7,PSMB8,PSMA3,PSMD5	-2.05161	-0.551902	22	68
CYTOPLASMIC RIBOSOMAL PROTEINS%WIKIPATHWAYS_20220510%WP477%HOMO SAPIENS	CYTOPLASMIC RIBOSOMAL PROTEINS%WIKIPATHWAYS_20220510%WP477%HOMO SAPIENS	0.000222173	0.0034844	-1	RPS6KA1,RPS13,RPS18,RPS9,RPL9,RPS16,RPS7,RPS6KB1,RPS4X,RPS17,RPLP2,RPS12,RPS3,RPS20,RPS24,RPL23,RPS27,RPSA,RPS21,RPS15,RPS2,RPS29,RPS5,RPLP0,RPL18A,RPS19,RPL37,RPL37A,RPL8,RPL34,RPLP1,RPL5,RPS28,RPL3L,RPL27A,RPS11,RPL12,RPL13,RPL29,RPL35A,RPS10,RPL11,RPL10A,RPL6,RPS3A,RPL27,RPL4,RPL30,RPS25,RPL19	-1.92492	-0.506292	50	77
SIGNALING BY HEDGEHOG%REACTOME DATABASE ID RELEASE 81%5358351	SIGNALING BY HEDGEHOG%REACTOME DATABASE ID RELEASE 81%5358351	0.000223214	0.0034844	-1	PSME2,ULK3,PSMA4,PSME1,PSMD14,PSMB6,PSMA1,PSMB3,PSMA7,PSMB4,PSMC2,PSMB7,PSMA6,PSMB2,PSMA2,PSMD7,DYNC2H1,PSMB8,PSMA3,PSMD5,WDR35,PSMC1	-1.73415	-0.455548	22	78
TCR SIGNALING%REACTOME%R-HSA-202403.5	TCR SIGNALING%REACTOME%R-HSA-202403.5	0.000223214	0.0034844	-1	PSME2,PSMA4,PSME1,UBE2V1,UBE2N,PSMD14,PSMB6,PSMA1,PSMB3,PSMA7,PSMB4,PSMC2,PSMB7,PSMA6,PSMB2,PSMA2,PSMD7,BCL10,PSMB8,PSMA3,PAK2,PSMD5,PTEN	-1.76931	-0.464787	23	78
KEAP1-NFE2L2 PATHWAY%REACTOME%R-HSA-9755511.2	KEAP1-NFE2L2 PATHWAY%REACTOME%R-HSA-9755511.2	0.000223514	0.0034844	-1	PSME2,PSMA4,TXNRD1,PSME1,GCLM,IDH1,PSMD14,PSMB6,PSMA1,PGD,PSMB3,PSMA7,PSMB4,PSMC2,PRDX1,PSMB7,PRKCD,PSMA6,PSMB2,PSMA2,PSMD7,TALDO1,PSMB8,PSMA3,NOTCH1,PSMD5,NQO1,ME1,PSMC1,SQSTM1	-1.98051	-0.517928	30	80
RESPIRATORY ELECTRON TRANSPORT CHAIN%GOBP%GO:0022904	RESPIRATORY ELECTRON TRANSPORT CHAIN%GOBP%GO:0022904	0.000223514	0.0034844	-1	NDUFS7,COX6A2,NDUFA12,UQCC3,UQCRH,UQCRB,NDUFA10,NDUFB7,NDUFA6,UQCRQ,GPD2,NDUFAB1,NDUFV2,NDUFB3,NDUFA5,NDUFA4,UQCR11,COA6,NDUFB9,NDUFS3,UQCRC1,UQCR10,MT-ND1,NDUFA9,ETFDH,NDUFS6,NDUFS1,NDUFS8,NDUFS4,NDUFB6,NDUFC2,NDUFS2,ETFB,NDUFV1,NDUFB8,COX5B,NDUFAF1,COX5A,COX6B1,NDUFB4,NDUFA2,NDUFS5	-1.68079	-0.439546	42	80
RNA MODIFICATION%GOBP%GO:0009451	RNA MODIFICATION%GOBP%GO:0009451	0.000223514	0.0034844	-1	APOBEC2,TRMU,TRMT6,JMJD6,SNRPG,TRMT1,WDR6,FTO,TPRKB,TRMT112,METTL5,TFB1M,SNRPD3,ELP4,YRDC,MOCS3,TRMT61B,SNRPF,MEPCE,ALKBH3,NOP2,SSB,METTL2A,ELP6,THUMPD3,C9ORF64,NSUN6,SNRPE,HNRNPAB,OSGEP,FBL,ELP2	-1.68311	-0.440153	32	80
EUKARYOTIC TRANSLATION ELONGATION%REACTOME%R-HSA-156842.2	EUKARYOTIC TRANSLATION ELONGATION%REACTOME%R-HSA-156842.2	0.000223714	0.0034844	-1	RPS15A,RPS13,RPS18,RPS9,RPS16,RPS7,RPS4X,EEF1D,EEF2,RPS17,RPLP2,RPS12,EEF1A2,RPS3,RPS20,RPS24,RPL23,EEF1B2,RPS27,RPSA,RPS21,RPS15,RPS2,RPS29,RPS5,RPLP0,RPL18A,RPS19,RPL37,RPL37A,RPL8,RPL34,RPLP1,RPL5,RPS28,RPL3L,RPL27A,RPS11,RPL12,RPL13,RPL29,RPL35A,RPS10,RPL11,RPL10A,RPL6,RPS3A,RPL27,FAU,RPL4,RPL30,RPS25,RPL19,EEF1G	-1.8672	-0.482829	54	85
RESPONSE OF EIF2AK4 (GCN2) TO AMINO ACID DEFICIENCY%REACTOME%R-HSA-9633012.2	RESPONSE OF EIF2AK4 (GCN2) TO AMINO ACID DEFICIENCY%REACTOME%R-HSA-9633012.2	0.000223714	0.0034844	-1	RPS15A,RPS13,RPS18,RPS9,RPS16,RPS7,RPS4X,RPS17,RPLP2,EIF2S1,EIF2S3,RPS12,RPS3,RPS20,RPS24,RPL23,RPS27,RPSA,RPS21,RPS15,RPS2,RPS29,RPS5,RPLP0,EIF2S2,RPL18A,RPS19,RPL37,ASNS,RPL37A,RPL8,RPL34,RPLP1,RPL5,RPS28,RPL3L,RPL27A,RPS11,RPL12,RPL13,RPL29,RPL35A,RPS10,RPL11,RPL10A,RPL6,RPS3A,RPL27,FAU,RPL4,RPL30,RPS25,RPL19	-1.88829	-0.488282	53	85
EUKARYOTIC TRANSLATION TERMINATION%REACTOME DATABASE ID RELEASE 81%72764	EUKARYOTIC TRANSLATION TERMINATION%REACTOME DATABASE ID RELEASE 81%72764	0.000223714	0.0034844	-1	RPS15A,RPS13,RPS18,RPS9,TRMT112,RPS16,RPS7,RPS4X,GSPT1,RPS17,RPLP2,RPS12,RPS3,RPS20,APEH,ETF1,RPS24,RPL23,RPS27,RPSA,RPS21,RPS15,GSPT2,RPS2,RPS29,RPS5,RPLP0,N6AMT1,RPL18A,RPS19,RPL37,RPL37A,RPL8,RPL34,RPLP1,RPL5,RPS28,RPL3L,RPL27A,RPS11,RPL12,RPL13,RPL29,RPL35A,RPS10,RPL11,RPL10A,RPL6,RPS3A,RPL27,FAU,RPL4,RPL30,RPS25,RPL19	-1.94614	-0.503243	55	85
NONSENSE MEDIATED DECAY (NMD) INDEPENDENT OF THE EXON JUNCTION COMPLEX (EJC)%REACTOME%R-HSA-975956.1	NONSENSE MEDIATED DECAY (NMD) INDEPENDENT OF THE EXON JUNCTION COMPLEX (EJC)%REACTOME%R-HSA-975956.1	0.000223964	0.0034844	-1	RPS15A,RPS13,RPS18,RPS9,RPS16,RPS7,NCBP2,RPS4X,GSPT1,RPS17,RPLP2,RPS12,RPS3,RPS20,ETF1,RPS24,RPL23,RPS27,RPSA,RPS21,RPS15,GSPT2,RPS2,RPS29,RPS5,RPLP0,NCBP1,RPL18A,RPS19,RPL37,RPL37A,RPL8,RPL34,RPLP1,RPL5,RPS28,RPL3L,RPL27A,RPS11,EIF4G1,RPL12,RPL13,RPL29,RPL35A,RPS10,RPL11,RPL10A,RPL6,RPS3A,RPL27,FAU,RPL4,RPL30,RPS25,RPL19	-1.92676	-0.497039	55	87
SELENOCYSTEINE SYNTHESIS%REACTOME DATABASE ID RELEASE 81%2408557	SELENOCYSTEINE SYNTHESIS%REACTOME DATABASE ID RELEASE 81%2408557	0.000224165	0.0034844	-1	RPS15A,RPS13,RPS18,RPS9,RPS16,RPS7,RPS4X,RPS17,RPLP2,RPS12,RPS3,RPS20,RPS24,RPL23,RPS27,RPSA,RPS21,RPS15,RPS2,RPS29,RPS5,RPLP0,RPL18A,RPS19,RPL37,RPL37A,RPL8,RPL34,RPLP1,RPL5,RPS28,RPL3L,RPL27A,RPS11,RPL12,RPL13,RPL29,RPL35A,RPS10,RPL11,RPL10A,RPL6,RPS3A,RPL27,FAU,RPL4,RPL30,RPS25,RPL19	-1.82081	-0.474365	49	82
PEPTIDE CHAIN ELONGATION%REACTOME%R-HSA-156902.2	PEPTIDE CHAIN ELONGATION%REACTOME%R-HSA-156902.2	0.000224467	0.0034844	-1	RPS15A,RPS13,RPS18,RPS9,RPS16,RPS7,RPS4X,EEF2,RPS17,RPLP2,RPS12,RPS3,RPS20,RPS24,RPL23,RPS27,RPSA,RPS21,RPS15,RPS2,RPS29,RPS5,RPLP0,RPL18A,RPS19,RPL37,RPL37A,RPL8,RPL34,RPLP1,RPL5,RPS28,RPL3L,RPL27A,RPS11,RPL12,RPL13,RPL29,RPL35A,RPS10,RPL11,RPL10A,RPL6,RPS3A,RPL27,FAU,RPL4,RPL30,RPS25,RPL19	-1.8157	-0.473949	50	81
S PHASE%REACTOME%R-HSA-69242.2	S PHASE%REACTOME%R-HSA-69242.2	0.000224467	0.0034844	-1	PSME2,PSMA4,PSME1,PSMD14,PSMB6,MCM4,PSMA1,CDK2,PSMB3,PSMA7,PSMB4,PSMC2,PSMB7,PSMA6,PSMB2,PSMA2,PSMD7,PSMB8,PSMA3,PSMD5,PSMC1,ORC4,PCNA,RBX1,PSMC5,RPA3,PSMD1,CDKN1B,PSMB10,CUL1,CDC27,PSMF1,ANAPC5,PSMC3,PSMD12,PSME4,PSMD11	-1.88119	-0.491042	37	81
VIRAL MRNA TRANSLATION%REACTOME DATABASE ID RELEASE 81%192823	VIRAL MRNA TRANSLATION%REACTOME DATABASE ID RELEASE 81%192823	0.000224467	0.0034844	-1	RPS15A,RPS13,RPS18,RPS9,RPS16,RPS7,RPS4X,RPS17,RPLP2,RPS12,RPS3,RPS20,RPS24,RPL23,RPS27,RPSA,RPS21,RPS15,RPS2,RPS29,RPS5,RPLP0,RPL18A,RPS19,RPL37,RPL37A,RPL8,RPL34,RPLP1,RPL5,RPS28,RPL3L,RPL27A,RPS11,RPL12,RPL13,RPL29,RPL35A,RPS10,RPL11,RPL10A,RPL6,RPS3A,RPL27,FAU,RPL4,RPL30,RPS25,RPL19	-1.83509	-0.47901	49	81
INTERLEUKIN-1 FAMILY SIGNALING%REACTOME DATABASE ID RELEASE 81%446652	INTERLEUKIN-1 FAMILY SIGNALING%REACTOME DATABASE ID RELEASE 81%446652	0.00022477	0.0034844	-1	S100B,PSME2,STAT3,PSMA4,SAA1,MAP2K1,PSME1,UBE2V1,UBE2N,PSMD14,PSMB6,PSMA1,PTPN6,PSMB3,PSMA7,PSMB4,PSMC2,PSMB7,PSMA6,PSMB2,PSMA2,PSMD7,USP14,PSMB8,PSMA3,MAP2K4,PSMD5	-1.80931	-0.466208	27	88
TRNA METABOLIC PROCESS%GOBP%GO:0006399	TRNA METABOLIC PROCESS%GOBP%GO:0006399	0.00022477	0.0034844	-1	TRMU,TRMT6,RARS2,ZBTB8OS,GTF3C5,TRMT1,WDR6,TPRKB,FARSB,CARS2,DTD1,TRMT112,ELP4,YRDC,MOCS3,TRMT61B,EXOSC3,ELAC2,SSB,METTL2A,QRSL1,ELP6,THUMPD3,C9ORF64,NSUN6,EXOSC9,LARS2,OSGEP,ELP2,EXOSC7,DTD2,EXOSC10	-1.76856	-0.455709	32	88
FORMATION OF A POOL OF FREE 40S SUBUNITS%REACTOME%R-HSA-72689.2	FORMATION OF A POOL OF FREE 40S SUBUNITS%REACTOME%R-HSA-72689.2	0.000225276	0.0034844	-1	RPS15A,RPS13,RPS18,RPS9,RPS16,RPS7,EIF3I,RPS4X,RPS17,RPLP2,EIF3F,EIF3M,RPS12,RPS3,RPS20,RPS24,EIF3J,RPL23,RPS27,RPSA,RPS21,RPS15,RPS2,RPS29,RPS5,RPLP0,EIF3D,RPL18A,RPS19,RPL37,RPL37A,RPL8,RPL34,RPLP1,RPL5,RPS28,RPL3L,RPL27A,RPS11,RPL12,RPL13,RPL29,RPL35A,RPS10,RPL11,RPL10A,RPL6,RPS3A,RPL27,FAU,RPL4,RPL30,RPS25,RPL19	-1.79788	-0.459085	54	92
SEPARATION OF SISTER CHROMATIDS%REACTOME DATABASE ID RELEASE 81%2467813	SEPARATION OF SISTER CHROMATIDS%REACTOME DATABASE ID RELEASE 81%2467813	0.000225785	0.0034844	-1	CLASP2,PSME2,PSMA4,NUP43,PSME1,PSMD14,PSMB6,PPP1CC,PSMA1,PSMB3,PSMA7,PSMB4,PPP2CA,PSMC2,PSMB7,PSMA6,PPP2CB,PSMB2,PSMA2,PSMD7,PSMB8,PSMA3,PSMD5,PAFAH1B1,PSMC1,NUDC,PPP2R5D,RPS27,PPP2R5C,PSMC5,PPP2R1A,PSMD1,DYNC1LI1,PSMB10,PPP2R5E,NUP160,CDC27,PSMF1,RANGAP1,ANAPC5,NUP37,PSMC3,PSMD12,PSME4,NUP85,PSMD11	-1.68843	-0.426136	46	99
RESPIRATORY ELECTRON TRANSPORT%REACTOME DATABASE ID RELEASE 81%611105	RESPIRATORY ELECTRON TRANSPORT%REACTOME DATABASE ID RELEASE 81%611105	0.000225836	0.0034844	-1	NDUFS7,NDUFA12,UQCRH,COQ10A,UQCRB,NDUFA10,NDUFB7,NDUFA6,UQCRQ,NDUFAB1,NDUFV2,NDUFB3,NDUFA5,NDUFA4,UQCR11,TMEM126B,ECSIT,NDUFB9,NDUFS3,UQCRC1,UQCR10,NDUFA11,TRAP1,MT-ND1,NUBPL,NDUFA9,ETFDH,NDUFS6,NDUFS1,NDUFS8,NDUFS4,NDUFB6,NDUFC2,NDUFS2,NDUFAF5,ETFB,NDUFV1,NDUFB8,COX5B,NDUFAF1,TACO1,COQ10B,COX5A,COX7A2L,COX6B1,NDUFB4,NDUFA2,NDUFS5	-1.82311	-0.460915	48	98
SELENOAMINO ACID METABOLISM%REACTOME DATABASE ID RELEASE 81%2408522	SELENOAMINO ACID METABOLISM%REACTOME DATABASE ID RELEASE 81%2408522	0.000226296	0.0034844	-1	TXNRD1,RPS15A,RPS13,EEF1E1,RPS18,RPS9,RPS16,RPS7,SCLY,PAPSS2,RPS4X,INMT,RPS17,RPLP2,AIMP2,RPS12,RPS3,RPS20,AIMP1,RPS24,RPL23,RPS27,RPSA,RPS21,RPS15,RPS2,RPS29,RPS5,RPLP0,RPL18A,RPS19,RPL37,RPL37A,RPL8,RPL34,RPLP1,RPL5,RPS28,RPL3L,RPL27A,PAPSS1,NNMT,RPS11,RPL12,RPL13,RPL29,RPL35A,RPS10,RPL11,RPL10A,AHCY,RPL6,RPS3A,RPL27,FAU,RPL4,RPL30,RPS25,RPL19	-1.88842	-0.481841	59	93
RESPIRATORY ELECTRON TRANSPORT, ATP SYNTHESIS BY CHEMIOSMOTIC COUPLING, AND HEAT PRODUCTION BY UNCOUPLING PROTEINS.%REACTOME DATABASE ID RELEASE 81%163200	RESPIRATORY ELECTRON TRANSPORT, ATP SYNTHESIS BY CHEMIOSMOTIC COUPLING, AND HEAT PRODUCTION BY UNCOUPLING PROTEINS.%REACTOME DATABASE ID RELEASE 81%163200	0.000226501	0.0034844	-1	NDUFS7,NDUFA12,UQCRH,COQ10A,UQCRB,NDUFA10,NDUFB7,NDUFA6,UQCRQ,NDUFAB1,NDUFV2,NDUFB3,NDUFA5,NDUFA4,UQCR11,TMEM126B,ECSIT,NDUFB9,NDUFS3,UQCRC1,UQCR10,NDUFA11,TRAP1,MT-ND1,NUBPL,NDUFA9,MT-ATP6,ETFDH,NDUFS6,NDUFS1,NDUFS8,NDUFS4,NDUFB6,NDUFC2,NDUFS2,NDUFAF5,ETFB,NDUFV1,NDUFB8,COX5B,NDUFAF1,TACO1,COQ10B,COX5A,COX7A2L,COX6B1,NDUFB4,NDUFA2,NDUFS5	-1.83716	-0.46356	49	100
UB-SPECIFIC PROCESSING PROTEASES%REACTOME DATABASE ID RELEASE 81%5689880	UB-SPECIFIC PROCESSING PROTEASES%REACTOME DATABASE ID RELEASE 81%5689880	0.000227531	0.0034844	-1	PSME2,PSMA4,PSME1,ADRM1,PSMD14,PSMB6,PSMA1,PSMB3,PSMA7,USP8,PSMB4,RUVBL1,PSMC2,PSMB7,PSMA6,PSMB2,PSMA2,PSMD7,WDR48,USP14,SMAD4,PSMB8,USP10,PSMA3,PSMD5,PTEN,OTUB1,USP2,USP47,PSMC1,USP7	-1.78881	-0.450773	31	101
CELLULAR LIPID CATABOLIC PROCESS%GOBP%GO:0044242	CELLULAR LIPID CATABOLIC PROCESS%GOBP%GO:0044242	0.000227531	0.0034844	-1	PCK2,HADHA,DECR1,LYPLA2,PRDX6,HADHB,CPT2,ACAT1,PLBD2,FUCA1,BCO2,HSD17B4,SIRT2,GBA,ACADVL,ECHS1,PLA2G4C,ACAA2,GCDH,ECI2,PNPLA2,PPT1,ACOT8,ADIPOQ,SCP2,ACAT2,ASAH1,LIPE,PCCB,HADH,AUH,SRD5A3,GM2A,ABHD6,AKR1C3,NEU1,CRAT	-1.68063	-0.423511	37	101
L13A-MEDIATED TRANSLATIONAL SILENCING OF CERULOPLASMIN EXPRESSION%REACTOME DATABASE ID RELEASE 81%156827	L13A-MEDIATED TRANSLATIONAL SILENCING OF CERULOPLASMIN EXPRESSION%REACTOME DATABASE ID RELEASE 81%156827	0.000227687	0.0034844	-1	RPS15A,EIF4E,RPS13,RPS18,RPS9,EIF4A1,RPS16,RPS7,EIF3I,RPS4X,RPS17,RPLP2,EIF2S1,EIF3F,EIF4A2,EIF3M,EIF2S3,RPS12,RPS3,RPS20,RPS24,EIF3J,RPL23,EIF4B,RPS27,RPSA,RPS21,RPS15,RPS2,RPS29,RPS5,RPLP0,EIF2S2,EIF3D,RPL18A,RPS19,RPL37,RPL37A,RPL8,EIF4H,RPL34,RPLP1,RPL5,RPS28,RPL3L,RPL27A,RPS11,EIF4G1,RPL12,RPL13,RPL29,RPL35A,RPS10,RPL11,RPL10A,RPL6,RPS3A,RPL27,FAU,RPL4,RPL30,RPS25,RPL19	-1.92734	-0.484995	63	102
NONSENSE MEDIATED DECAY (NMD) ENHANCED BY THE EXON JUNCTION COMPLEX (EJC)%REACTOME DATABASE ID RELEASE 81%975957	NONSENSE MEDIATED DECAY (NMD) ENHANCED BY THE EXON JUNCTION COMPLEX (EJC)%REACTOME DATABASE ID RELEASE 81%975957	0.000228258	0.0034844	-1	RPS15A,RPS13,RPS18,PPP2CA,RPS9,MAGOH,RPS16,RPS7,NCBP2,RPS4X,GSPT1,RPS17,RPLP2,RPS12,CASC3,RPS3,RPS20,ETF1,RPS24,RPL23,RPS27,RPSA,PPP2R2A,RPS21,RPS15,PPP2R1A,GSPT2,SMG9,RPS2,RPS29,RPS5,RPLP0,NCBP1,RPL18A,RPS19,RPL37,RPL37A,RPL8,RPL34,RPLP1,RPL5,RPS28,RPL3L,RPL27A,RPS11,EIF4A3,EIF4G1,RPL12,RPL13,RPL29,RPL35A,RPS10,RPL11,RPL10A,RPL6,RPS3A,RBM8A,RPL27,FAU,RPL4,RPL30,RPS25,RPL19	-1.83098	-0.4603	63	103
GTP HYDROLYSIS AND JOINING OF THE 60S RIBOSOMAL SUBUNIT%REACTOME DATABASE ID RELEASE 81%72706	GTP HYDROLYSIS AND JOINING OF THE 60S RIBOSOMAL SUBUNIT%REACTOME DATABASE ID RELEASE 81%72706	0.000228258	0.0034844	-1	RPS15A,EIF4E,EIF5,RPS13,RPS18,RPS9,EIF4A1,RPS16,RPS7,EIF3I,RPS4X,RPS17,RPLP2,EIF2S1,EIF3F,EIF4A2,EIF3M,EIF2S3,RPS12,RPS3,RPS20,RPS24,EIF3J,RPL23,EIF4B,RPS27,RPSA,RPS21,RPS15,RPS2,RPS29,RPS5,RPLP0,EIF2S2,EIF3D,RPL18A,RPS19,RPL37,RPL37A,RPL8,EIF4H,RPL34,RPLP1,RPL5,RPS28,RPL3L,RPL27A,RPS11,EIF4G1,RPL12,RPL13,RPL29,RPL35A,RPS10,RPL11,RPL10A,RPL6,RPS3A,RPL27,FAU,RPL4,RPL30,RPS25,RPL19	-1.94846	-0.489832	64	103
NONSENSE-MEDIATED DECAY (NMD)%REACTOME DATABASE ID RELEASE 81%927802	NONSENSE-MEDIATED DECAY (NMD)%REACTOME DATABASE ID RELEASE 81%927802	0.000228258	0.0034844	-1	RPS15A,RPS13,RPS18,PPP2CA,RPS9,MAGOH,RPS16,RPS7,NCBP2,RPS4X,GSPT1,RPS17,RPLP2,RPS12,CASC3,RPS3,RPS20,ETF1,RPS24,RPL23,RPS27,RPSA,PPP2R2A,RPS21,RPS15,PPP2R1A,GSPT2,SMG9,RPS2,RPS29,RPS5,RPLP0,NCBP1,RPL18A,RPS19,RPL37,RPL37A,RPL8,RPL34,RPLP1,RPL5,RPS28,RPL3L,RPL27A,RPS11,EIF4A3,EIF4G1,RPL12,RPL13,RPL29,RPL35A,RPS10,RPL11,RPL10A,RPL6,RPS3A,RBM8A,RPL27,FAU,RPL4,RPL30,RPS25,RPL19	-1.83098	-0.4603	63	103
EUKARYOTIC TRANSLATION INITIATION%REACTOME DATABASE ID RELEASE 81%72613	EUKARYOTIC TRANSLATION INITIATION%REACTOME DATABASE ID RELEASE 81%72613	0.000228571	0.0034844	-1	RPS15A,EIF4E,EIF5,RPS13,RPS18,RPS9,EIF4A1,RPS16,RPS7,EIF3I,RPS4X,RPS17,RPLP2,EIF2S1,EIF3F,EIF4A2,EIF3M,EIF2S3,RPS12,RPS3,RPS20,RPS24,EIF3J,RPL23,EIF4B,RPS27,EIF4EBP1,RPSA,RPS21,RPS15,RPS2,RPS29,RPS5,RPLP0,EIF2S2,EIF3D,RPL18A,RPS19,RPL37,EIF2B3,RPL37A,RPL8,EIF4H,RPL34,RPLP1,RPL5,RPS28,RPL3L,RPL27A,RPS11,EIF4G1,RPL12,RPL13,RPL29,RPL35A,RPS10,RPL11,RPL10A,RPL6,RPS3A,RPL27,FAU,RPL4,RPL30,RPS25,RPL19	-1.87008	-0.4656	66	110
CAP-DEPENDENT TRANSLATION INITIATION%REACTOME DATABASE ID RELEASE 81%72737	CAP-DEPENDENT TRANSLATION INITIATION%REACTOME DATABASE ID RELEASE 81%72737	0.000228571	0.0034844	-1	RPS15A,EIF4E,EIF5,RPS13,RPS18,RPS9,EIF4A1,RPS16,RPS7,EIF3I,RPS4X,RPS17,RPLP2,EIF2S1,EIF3F,EIF4A2,EIF3M,EIF2S3,RPS12,RPS3,RPS20,RPS24,EIF3J,RPL23,EIF4B,RPS27,EIF4EBP1,RPSA,RPS21,RPS15,RPS2,RPS29,RPS5,RPLP0,EIF2S2,EIF3D,RPL18A,RPS19,RPL37,EIF2B3,RPL37A,RPL8,EIF4H,RPL34,RPLP1,RPL5,RPS28,RPL3L,RPL27A,RPS11,EIF4G1,RPL12,RPL13,RPL29,RPL35A,RPS10,RPL11,RPL10A,RPL6,RPS3A,RPL27,FAU,RPL4,RPL30,RPS25,RPL19	-1.87008	-0.4656	66	110
CELLULAR AMINO ACID METABOLIC PROCESS%GOBP%GO:0006520	CELLULAR AMINO ACID METABOLIC PROCESS%GOBP%GO:0006520	0.000228624	0.0034844	-1	SEPHS1,GLUD2,MTHFR,ALDH6A1,GCLM,RARS2,SHMT1,THAP4,AASDHPPT,ACAT1,GLUL,FARSB,PEPD,ASL,BCKDHB,CARS2,GCAT,MCCC2,MPST,TST,BCAT2,SCLY,GSS,GOT1,ECHS1,ADI1,GCSH,FPGS,HIBADH,QRSL1,QDPR,PCCB,BCKDHA,ASS1,ALDH5A1,AASS,MRI1,ALDH1A1,MTHFS	-1.7775	-0.436942	39	120
ORGANIC ACID CATABOLIC PROCESS%GOBP%GO:0016054	ORGANIC ACID CATABOLIC PROCESS%GOBP%GO:0016054	0.000228624	0.0034844	-1	PM20D2,GLUD2,PCK2,HADHA,DECR1,ALDH6A1,SHMT1,HADHB,CPT2,AASDHPPT,PGD,ACAT1,GLUL,BCKDHB,HSD17B4,MCCC2,MPST,ACADVL,TST,GOT1,ECHS1,ACAA2,GCDH,ECI2,GCSH,NAGK,HIBADH,ALDH1L1,ACOT8,ADIPOQ,SCP2,ACAT2,QDPR,PCCB,BCKDHA,ALDH5A1,AASS,HADH,AUH,MTHFS	-1.77228	-0.43566	40	120
MAJOR PATHWAY OF RRNA PROCESSING IN THE NUCLEOLUS AND CYTOSOL%REACTOME DATABASE ID RELEASE 81%6791226	MAJOR PATHWAY OF RRNA PROCESSING IN THE NUCLEOLUS AND CYTOSOL%REACTOME DATABASE ID RELEASE 81%6791226	0.000229043	0.0034844	-1	RPS15A,RPS13,NOL9,RPS18,WDR36,RPS9,DDX47,UTP15,NIP7,RPS16,RPS7,WDR75,EXOSC3,RPS4X,RPS17,RPLP2,XRN2,RPS12,RPS3,RPS20,RPS24,RPL23,BMS1,RPS27,UTP6,RPSA,EXOSC9,RPS21,FBL,RPS15,EXOSC7,DDX49,EXOSC10,GNL3,RPS2,RPS29,RPS5,RPLP0,PDCD11,RPL18A,RPS19,RRP9,RPL37,WDR12,RPL37A,RPL8,NOL6,RPL34,RPLP1,RPL5,RPS28,RPL3L,HEATR1,RPL27A,RPP14,RPS11,NOL11,EXOSC6,RPL12,RPL13,RPL29,RPL35A,RPS10,RRP1,RPL11,EMG1,RPL10A,RPL…	-1.91597	-0.467863	73	126
RRNA PROCESSING%REACTOME DATABASE ID RELEASE 81%72312	RRNA PROCESSING%REACTOME DATABASE ID RELEASE 81%72312	0.0002292	0.0034844	-1	RPS15A,RPS13,NOL9,RPS18,WDR36,RPS9,DDX47,UTP15,TRMT112,NIP7,RPS16,RPS7,TFB1M,WDR75,EXOSC3,RPS4X,RPS17,RPLP2,ELAC2,NOP2,XRN2,RPS12,RPS3,RPS20,RPS24,RPL23,BMS1,RPS27,UTP6,RPSA,EXOSC9,RPS21,FBL,RPS15,EXOSC7,DDX49,EXOSC10,GNL3,RPS2,THUMPD1,RPS29,RPS5,RPLP0,PDCD11,RPL18A,RPS19,RRP9,RPL37,TRMT10C,WDR12,RPL37A,RPL8,NOL6,RPL34,RPLP1,RPL5,RPS28,RPL3L,HEATR1,RPL27A,RPP14,RPS11,NOL11,TSR3,EXOSC6,RPL12,RPL13…	-1.7997	-0.432577	82	139
CYTOPLASMIC TRANSLATION%GOBP%GO:0002181	CYTOPLASMIC TRANSLATION%GOBP%GO:0002181	0.000229358	0.0034844	-1	RPS15A,EIF5,RPS13,RPS18,RPS9,EIF4A1,RPS16,RPS7,NCBP2,EIF3I,RPS4X,DRG1,RPS17,RPLP2,EIF3F,EIF4A2,EIF3M,EIF2S3,RPS12,RPS3,RPS20,ETF1,RPS24,EIF3J,RPL23,DENR,EIF4B,RPS27,RPSA,RPS21,ZC3H15,DRG2,RPS15,DHX29,RPS2,RPS29,RPS5,RPLP0,MCTS1,EIF2S2,NCBP1,EIF3D,RPL18A,RPS19,RPL37,EIF2B3,RPL37A,RPL8,EIF4H,RPL34,RPLP1,RPL5,RPS28,RPL27A,RPS11,EIF4G1,RPL12,RPL13,RPL29,RPL35A,RPS10,RPL11,RPL10A,RPL6,MIF4GD,RPS3A,RPL…	-1.96706	-0.489398	72	111
CELL CYCLE CHECKPOINTS%REACTOME%R-HSA-69620.2	CELL CYCLE CHECKPOINTS%REACTOME%R-HSA-69620.2	0.000229621	0.0034844	-1	CLASP2,PSME2,PSMA4,NUP43,PSME1,UBE2N,PSMD14,PSMB6,PPP1CC,MCM4,PSMA1,CDK2,PSMB3,PSMA7,PSMB4,PPP2CA,PSMC2,PSMB7,PSMA6,PPP2CB,PSMB2,PSMA2,UBE2V2,PSMD7,PSMB8,TP53BP1,PSMA3,PSMD5,PAFAH1B1,PSMC1,NUDC,PPP2R5D,ORC4,RPS27,PPP2R5C,YWHAZ,PSMC5,PPP2R1A,RPA3,PSMD1,DYNC1LI1,CDKN1B,YWHAE,BRCC3,PSMB10,PPP2R5E,NUP160,CDC27,PSMF1,RANGAP1,BABAM1,ANAPC5,NUP37,PSMC3,PSMD12,PSME4,NUP85,PSMD11	-1.80181	-0.442957	58	121
RRNA PROCESSING IN THE NUCLEUS AND CYTOSOL%REACTOME DATABASE ID RELEASE 81%8868773	RRNA PROCESSING IN THE NUCLEUS AND CYTOSOL%REACTOME DATABASE ID RELEASE 81%8868773	0.000229991	0.0034844	-1	RPS15A,RPS13,NOL9,RPS18,WDR36,RPS9,DDX47,UTP15,TRMT112,NIP7,RPS16,RPS7,WDR75,EXOSC3,RPS4X,RPS17,RPLP2,NOP2,XRN2,RPS12,RPS3,RPS20,RPS24,RPL23,BMS1,RPS27,UTP6,RPSA,EXOSC9,RPS21,FBL,RPS15,EXOSC7,DDX49,EXOSC10,GNL3,RPS2,THUMPD1,RPS29,RPS5,RPLP0,PDCD11,RPL18A,RPS19,RRP9,RPL37,WDR12,RPL37A,RPL8,NOL6,RPL34,RPLP1,RPL5,RPS28,RPL3L,HEATR1,RPL27A,RPP14,RPS11,NOL11,TSR3,EXOSC6,RPL12,RPL13,RPL29,RPL35A,RPS10,…	-1.94008	-0.470246	77	132
THE CITRIC ACID (TCA) CYCLE AND RESPIRATORY ELECTRON TRANSPORT%REACTOME DATABASE ID RELEASE 81%1428517	THE CITRIC ACID (TCA) CYCLE AND RESPIRATORY ELECTRON TRANSPORT%REACTOME DATABASE ID RELEASE 81%1428517	0.000230097	0.0034844	-1	IDH2,ME3,NDUFS7,NDUFA12,UQCRH,COQ10A,GLO1,UQCRB,PDK4,NDUFA10,NDUFB7,LDHB,NDUFA6,UQCRQ,LDHA,NDUFAB1,FH,NDUFV2,NDUFB3,NDUFA5,FAHD1,MDH2,ME1,NDUFA4,UQCR11,TMEM126B,SUCLG2,ECSIT,NDUFB9,NDUFS3,UQCRC1,UQCR10,SUCLA2,NDUFA11,TRAP1,MT-ND1,NUBPL,NDUFA9,MT-ATP6,ETFDH,NDUFS6,NDUFS1,SUCLG1,NDUFS8,NDUFS4,NDUFB6,NDUFC2,NDUFS2,NDUFAF5,ETFB,NDUFV1,NDUFB8,COX5B,NDUFAF1,TACO1,ACO2,COQ10B,COX5A,COX7A2L,COX6B1,NDUFB4…	-1.74903	-0.419599	64	141
REGULATION OF EXPRESSION OF SLITS AND ROBOS%REACTOME%R-HSA-9010553.1	REGULATION OF EXPRESSION OF SLITS AND ROBOS%REACTOME%R-HSA-9010553.1	0.000230097	0.0034844	-1	PSME2,PSMA4,RPS15A,PSME1,RPS13,PSMD14,PSMB6,PSMA1,RPS18,PSMB3,PSMA7,PSMB4,SLIT1,RPS9,PSMC2,PSMB7,PSMA6,MAGOH,RPS16,PSMB2,RPS7,PSMA2,PSMD7,NCBP2,PSMB8,PSMA3,RPS4X,GSPT1,PSMD5,RPS17,RPLP2,PSMC1,RPS12,CASC3,RPS3,RPS20,ETF1,RPS24,RPL23,CUL2,RPS27,RPSA,RPS21,RBX1,RPS15,PSMC5,GSPT2,PSMD1,RPS2,RPS29,RPS5,ZSWIM8,RPLP0,PSMB10,PSMF1,NCBP1,RPL18A,RPS19,RPL37,PSMC3,PSMD12,PSME4,PSMD11,RPL37A,RPL8,PSMD13,RPL3…	-2.03619	-0.489006	91	140
NEDDYLATION%REACTOME DATABASE ID RELEASE 81%8951664	NEDDYLATION%REACTOME DATABASE ID RELEASE 81%8951664	0.000230256	0.0034844	-1	PSME2,ASB11,COPS2,PSMA4,ASB2,PSME1,NEDD8,COPS8,PSMD14,PSMB6,PSMA1,PSMB3,PSMA7,PSMB4,ZBTB16,PSMC2,NAE1,PSMB7,ASB15,PSMA6,COPS5,COPS4,PSMB2,PSMA2,PSMD7,UBE2M,PSMB8,PSMA3,UBE2F,COPS6,SENP8,PSMD5,KLHL21,COMMD2,FBXL18,CUL4B,PSMC1,COPS3,SQSTM1,UBA3,CUL2,ASB8,GPS1,DCAF11,UCHL3,PUM2,FBXO30,RBX1,KEAP1,DCUN1D1,PSMC5,WDR5,PSMD1,COPS7A,PSMB10,DCAF6,FBXO6,FEM1C,CUL1,PSMF1,COMMD9,FBXO40,NEURL2	-1.796	-0.433519	63	136
CELLULAR RESPONSE TO CHEMICAL STRESS%REACTOME DATABASE ID RELEASE 81%9711123	CELLULAR RESPONSE TO CHEMICAL STRESS%REACTOME DATABASE ID RELEASE 81%9711123	0.000230681	0.0034844	-1	PSME2,STAT3,SMARCD3,PSMA4,TXNRD1,PSME1,HMOX2,BLVRA,PRDX6,GCLM,IDH1,GSTP1,PSMD14,PSMB6,NCF2,PSMA1,PGD,PSMB3,PSMA7,PSMB4,PSMC2,PRDX1,PSMB7,PRKCD,PSMA6,TXNRD2,TXN,PSMB2,PSMA2,TXN2,PSMD7,TALDO1,PSMB8,PSMA3,NOTCH1,PSMD5,NQO1,ME1,PSMC1,NDUFA4,SQSTM1	-1.80707	-0.433283	41	142
HIV INFECTION%REACTOME DATABASE ID RELEASE 81%162906	HIV INFECTION%REACTOME DATABASE ID RELEASE 81%162906	0.000234687	0.00351902	-1	PSME2,PSMA4,NUP43,POLR2G,PSME1,PSMD14,PSMB6,CHMP2B,CCNT1,CHMP2A,NELFCD,PSMA1,PSMB3,PSMA7,PSMB4,PSMC2,PSMB7,PSMA6,VPS4A,NMT1,PSMB2,PSMA2,PSMD7,NCBP2,POLR2H,CHMP7,PSMB8,PSMA3,PAK2,NEDD4L,VPS37A,PSMD5,NUP155,PSMC1,NELFE,VTA1,POLR2J,ATP6V1H,AP1B1,RBX1,NUP50,DOCK2,MVB12A,B2M,PSMC5,XRCC5,PSMD1,AP2S1,CHMP3,NELFA,RNMT,XRCC6,SLC25A4,TSG101,PSMB10,AP2A1,GTF2F1,NUP160,PSMF1,NCBP1,RANGAP1,NUP37,NUP35,PSMC3,E…	-1.73316	-0.409574	73	160
ANTIGEN PROCESSING: UBIQUITINATION & PROTEASOME DEGRADATION%REACTOME DATABASE ID RELEASE 81%983168	ANTIGEN PROCESSING: UBIQUITINATION & PROTEASOME DEGRADATION%REACTOME DATABASE ID RELEASE 81%983168	0.000235294	0.00351902	-1	PSME2,RCHY1,ASB11,PSMA4,UBE2G1,ASB2,PSME1,UBE2V1,LRSAM1,UBE2N,PSMD14,PSMB6,GLMN,LNX1,UBE2K,PSMA1,PSMB3,UBE2Z,PSMA7,PSMB4,NPEPPS,ZBTB16,PSMC2,PSMB7,ASB15,PSMA6,PSMB2,PSMA2,UBE2V2,PSMD7,UBE2M,UBE2D4,PSMB8,PSMA3,UBE2F,NEDD4L,PSMD5,TRIM63,KLHL21,UBE2B,FBXL18,PSMC1,NEDD4,UBA3,CUL2,RBCK1,ASB8	-1.76991	-0.417356	47	162
SIGNALING BY ROBO RECEPTORS%REACTOME%R-HSA-376176.5	SIGNALING BY ROBO RECEPTORS%REACTOME%R-HSA-376176.5	0.000236072	0.00351902	-1	CLASP2,PSME2,PSMA4,RPS15A,PSME1,PFN2,RPS13,PSMD14,PSMB6,PSMA1,RPS18,PSMB3,PSMA7,PSMB4,SLIT1,RPS9,PSMC2,PSMB7,PSMA6,MAGOH,RPS16,PSMB2,RPS7,PSMA2,PSMD7,NCBP2,PSMB8,PSMA3,RPS4X,GSPT1,PAK2,PSMD5,RPS17,RPLP2,PSMC1,RPS12,CASC3,RPS3,CAP2,RPS20,ETF1,RPS24,RPL23,CUL2,RPS27,PRKACG,RPSA,RPS21,RBX1,RPS15,PSMC5,GSPT2,PSMD1,RPS2,RPS29,RPS5,ZSWIM8,RPLP0,PSMB10,PFN1,PAK4,PSMF1,NCBP1,RPL18A,RPS19,RPL37,PSMC3,PSMD…	-1.77888	-0.417001	100	169
SMALL MOLECULE CATABOLIC PROCESS%GOBP%GO:0044282	SMALL MOLECULE CATABOLIC PROCESS%GOBP%GO:0044282	0.000236463	0.00351902	-1	PM20D2,IMPA2,GLUD2,PCK2,HADHA,DECR1,HK3,ALDH6A1,SHMT1,HADHB,CPT2,AASDHPPT,FOXK2,SCARF1,PGD,ACAT1,GLUL,ADH5,BCKDHB,PARK7,HSD17B4,AKR1D1,PFKM,MCCC2,MPST,ENO1,ACADVL,TST,GOT1,ECHS1,ACAA2,GCDH,ECI2,GALK1,GCSH,GALT,NAGK,PTEN,HIBADH,ALDH1L1,ACOT8,ADIPOQ,TPI1,SCP2,ACAT2,QDPR,IMPA1,PCCB,BCKDHA,ALDH5A1,AASS,HADH,AUH,MTHFS,SRD5A3,INPP5J	-1.81233	-0.425882	56	167
PURINE RIBONUCLEOTIDE METABOLIC PROCESS%GOBP%GO:0009150	PURINE RIBONUCLEOTIDE METABOLIC PROCESS%GOBP%GO:0009150	0.000240211	0.00356166	-1	ENO3,PMVK,HINT1,ACACB,HK3,MVD,NDUFS7,GPI,ALDOC,NDUFA12,IMPDH1,FOXK2,OLA1,PDE2A,NUDT4,ACAT1,MVK,ALDOA,ACSF2,MYH6,HMGCS2,ACSS2,HSD17B4,PFKM,PFAS,PFKFB1,NDUFA10,NDUFB7,ENO1,MFN1,ADSL,NDUFA6,ACOT2,NUDT18,PAPSS2,HSPA1B,LDHA,GCDH,PGAM2,PPT1,NDUFAB1,NDUFV2,NDUFB3,ACOT8,GMPS,NDUFA5,TPI1,IMPDH2,ELOVL1,SUCLG2,GART,NDUFB9,NDUFS3,NT5C1A,PANK4,FAR1,APRT,SUCLA2,NDUFA11,MT-ND1,NDUFA9,MT-ATP6,PKM,NDUFS6,NDUFS1,B…	-1.57241	-0.363906	81	191
GENERATION OF PRECURSOR METABOLITES AND ENERGY%GOBP%GO:0006091	GENERATION OF PRECURSOR METABOLITES AND ENERGY%GOBP%GO:0006091	0.000241955	0.0035639	-1	ENO3,COX17,ACSS3,HK3,ME3,NDUFS7,COX6A2,GPI,ALDOC,NDUFA12,UQCC3,FOXK2,PGD,UQCRH,COQ10A,ACAT1,ALDOA,FDX1,UQCRB,HMGCS2,ACSS2,MDH1,PFKM,PFKFB1,NDUFA10,NDUFB7,ENO1,ACADVL,NDUFA6,UQCRQ,ADH1B,TALDO1,GPD2,LDHA,PGAM2,NDUFAB1,FH,NDUFV2,ALDH1L1,NDUFB3,PYGM,ADIPOQ,NDUFA5,TPI1,MDH2,NDUFA4,UQCR11,COA6,SUCLG2,RBKS,LYRM7,NDUFB9,NDUFS3,UQCRC1,UQCR10,POR,SUCLA2,NDUFA11,MT-ND1,NDUFA9,COX7A1,MT-ATP6,ETFDH,PKM,NDUFS6…	-1.70212	-0.392766	85	197
PURINE NUCLEOTIDE METABOLIC PROCESS%GOBP%GO:0006163	PURINE NUCLEOTIDE METABOLIC PROCESS%GOBP%GO:0006163	0.000242836	0.0035639	-1	ENO3,PMVK,HINT1,ACACB,SAMHD1,HK3,MVD,NDUFS7,GPI,ALDOC,NDUFA12,IMPDH1,FOXK2,OLA1,PDE2A,NUDT4,ACAT1,MVK,ALDOA,ACSF2,MYH6,HMGCS2,ACSS2,HSD17B4,PFKM,PFAS,PFKFB1,NDUFA10,NDUFB7,ENO1,MFN1,ADSL,NDUFA6,ACOT2,NUDT18,PAPSS2,HSPA1B,LDHA,GCDH,PGAM2,PPT1,NDUFAB1,NDUFV2,NDUFB3,ACOT8,GMPS,NDUFA5,TPI1,NUDT16,IMPDH2,ELOVL1,NUDT15,SUCLG2	-1.54298	-0.354606	53	204
MONOCARBOXYLIC ACID METABOLIC PROCESS%GOBP%GO:0032787	MONOCARBOXYLIC ACID METABOLIC PROCESS%GOBP%GO:0032787	0.000243013	0.0035639	-1	ENO3,DBI,FASN,BTD,PCK2,ACACB,HADHA,DECR1,HK3,ME3,GPI,HADHB,ALDOC,GSTP1,PTGES3,CPT2,AASDHPPT,FOXK2,OSBPL1A,PGD,ACAT1,ALDOA,ACSF2,ADH5,BCO2,GSTM2,THEM4,PARK7,HSD17B4,AKR1D1,PTGR1,GAMT,PFKM,PFKFB1,LDHB,ENO1,HLCS,GRHPR,ACADVL,ACOT2,GSTM4,ADH1B,ECHS1,PLA2G4C,ACAA2,LDHA,GCDH,PGAM2,ECI2,NDUFAB1,CYP7B1,ACOT8,ADIPOQ,SCPEP1,ECHDC3,TPI1,SCP2,ACAT2,CPT1A,ME1,GNPAT,ELOVL1,PCCB,ALDH5A1,HADH,AUH,ALDH1A1,MTHFS,A…	-1.83686	-0.420378	74	211
PURINE-CONTAINING COMPOUND METABOLIC PROCESS%GOBP%GO:0072521	PURINE-CONTAINING COMPOUND METABOLIC PROCESS%GOBP%GO:0072521	0.000245158	0.00357849	-1	ENO3,PMVK,HINT1,ACACB,SAMHD1,HK3,MVD,NDUFS7,SHMT1,GPI,ALDOC,NDUFA12,IMPDH1,FOXK2,OLA1,PDE2A,NUDT4,ACAT1,MVK,ALDOA,ACSF2,MYH6,HMGCS2,ACSS2,HSD17B4,PFKM,PFAS,PFKFB1,NDUFA10,NDUFB7,ENO1,MFN1,ADSL,NDUFA6,ACOT2,NUDT18,PAPSS2,HSPA1B,LDHA,GCDH,PGAM2,PPT1,NDUFAB1,NDUFV2,NDUFB3,ACOT8,GMPS,NDUFA5,TPI1,NUDT16,IMPDH2,ELOVL1,NUDT15,SUCLG2,GART,NDUFB9,NDUFS3,NT5C1A,PANK4,FAR1,APRT,SUCLA2,NDUFA11,MT-ND1,NDUFA9,…	-1.512	-0.345319	87	216
AMINO ACID AND DERIVATIVE METABOLISM%REACTOME DATABASE ID RELEASE 81%71291	AMINO ACID AND DERIVATIVE METABOLISM%REACTOME DATABASE ID RELEASE 81%71291	0.000246305	0.00357849	-1	PSME2,GLUD2,PSMA4,TXNRD1,RPS15A,PSME1,ALDH7A1,ALDH6A1,SHMT1,RPS13,PSMD14,PSMB6,EEF1E1,PSMA1,RPS18,PSMB3,PSMA7,ETHE1,ACAT1,PSMB4,GLUL,RPS9,PSMC2,PSMB7,CKM,ASL,PSMA6,BCKDHB,GAMT,GCAT,MCCC2,RPS16,PSMB2,RPS7,MPST,PSMA2,TXN2,GRHPR,TST,BCAT2,PSMD7,SCLY,GOT1,PAPSS2,ECHS1,PSMB8,PSMA3,GCDH,RPS4X,CHDH,NDUFAB1,PHYKPL,ADI1,GCSH,PSMD5,INMT,HIBADH,RPS17,RPLP2,NQO1,AIMP2,PSMC1,RPS12,QDPR,RPS3,RPS20,AIMP1,RPS24,…	-2.19645	-0.497283	97	232
NCRNA METABOLIC PROCESS%GOBP%GO:0034660	NCRNA METABOLIC PROCESS%GOBP%GO:0034660	0.00024667	0.00357849	-1	TRMU,PIN4,TRMT6,PIH1D1,RARS2,ZBTB8OS,NOL9,GTF3C5,ZC3H7B,TRMT1,WDR6,WDR36,NUDT16L1,TPRKB,FARSB,DDX47,UTP15,CARS2,DTD1,TRMT112,RPS16,RPS7,TSNAX,METTL5,NCBP2,TFB1M,ELP4,YRDC,MOCS3,TRMT61B,EXOSC3,MDN1,MEPCE,RPS17,ELAC2,SPIN1,NOP2,XRN2,SSB,NUDT16,METTL2A,QRSL1,ELP6,PLD6,MRTO4,TSR2,DIS3L2,RPS24,THUMPD3,RRS1,BMS1,C9ORF64,NSUN6,RPS27,UTP6,EXOSC9,SRSF3,INTS6,PUM2,RPS21,LARS2,TSN,OSGEP,FBL,ELP2,TDRD7,RPS15…	-1.58459	-0.35909	71	231
RIBONUCLEOPROTEIN COMPLEX BIOGENESIS%GOBP%GO:0022613	RIBONUCLEOPROTEIN COMPLEX BIOGENESIS%GOBP%GO:0022613	0.000252781	0.00363442	-1	CD2BP2,PIN4,PIH1D1,EIF5,PTGES3,EIF2A,NOL9,SNRPG,WDR36,GLUL,RUVBL1,DDX47,SNRPB2,BRIX1,UTP15,TRMT112,NIP7,RPS16,RPS7,METTL5,TFB1M,SNRPD3,C1QBP,EIF3I,SNRPA1,ZNF622,EXOSC3,CELF2,SNRPF,MDN1,TXNL4A,NUDT21,RUVBL2,RPS17,STRAP,SF3A2,LSM4,NOP2,XRN2,EIF3F,EIF3M,CUL4B,EIF2S3,LSM2,ABCE1,MRTO4,CPSF6,TSR2,RPS24,EIF3J,DENR,RRS1,EIF4B,BMS1,RPS27,SNRPE,UTP6,RPSA,EXOSC9,GTPBP4,RPS21,DDX3X,GEMIN6,SRSF10,FBL,RPS15,EX…	-1.50394	-0.336625	105	261
NUCLEOTIDE METABOLIC PROCESS%GOBP%GO:0009117	NUCLEOTIDE METABOLIC PROCESS%GOBP%GO:0009117	0.000253165	0.00363442	-1	ENO3,PMVK,HINT1,IDH2,ACACB,SAMHD1,GPD1L,HK3,MVD,NDUFS7,GPI,IDH1,ALDOC,NDUFA12,NAMPT,IMPDH1,FOXK2,OLA1,PGD,PDE2A,NUDT4,NADSYN1,ACAT1,MVK,ALDOA,ACSF2,MYH6,HMGCS2,ACSS2,MDH1,PARK7,HSD17B4,PFKM,PFAS,PFKFB1,NDUFA10,NDUFB7,ENO1,MFN1,ADSL,NDUFA6,ACOT2,NUDT18,PAPSS2,AK1,TALDO1,HSPA1B,LDHA,GCDH,PGAM2,PPT1,NDUFAB1,CMPK2,NDUFV2,ALDH1L1,NDUFB3,ACOT8,GMPS,RRM2B,NDUFA5,TPI1,NUDT16,IMPDH2,ME1,RFK,ELOVL1,NUDT15,…	-1.52943	-0.341878	69	264
NUCLEOSIDE PHOSPHATE METABOLIC PROCESS%GOBP%GO:0006753	NUCLEOSIDE PHOSPHATE METABOLIC PROCESS%GOBP%GO:0006753	0.000253229	0.00363442	-1	ENO3,PMVK,HINT1,IDH2,ACACB,SAMHD1,GPD1L,HK3,MVD,NDUFS7,GPI,IDH1,ALDOC,NDUFA12,NAMPT,IMPDH1,FOXK2,OLA1,PGD,PDE2A,NUDT4,NADSYN1,ACAT1,MVK,ALDOA,ACSF2,MYH6,HMGCS2,ACSS2,MDH1,PARK7,HSD17B4,PFKM,PFAS,PFKFB1,NDUFA10,NDUFB7,ENO1,MFN1,ADSL,NDUFA6,ACOT2,NUDT18,PAPSS2,AK1,TALDO1,HSPA1B,LDHA,GCDH,PGAM2,PPT1,NDUFAB1,CMPK2,NDUFV2,ALDH1L1,NDUFB3,ACOT8,GMPS,RRM2B,NDUFA5,TPI1,NUDT16,IMPDH2,ME1,RFK,ELOVL1,NUDT15,…	-1.49309	-0.333171	69	267
CARBOXYLIC ACID METABOLIC PROCESS%GOBP%GO:0019752	CARBOXYLIC ACID METABOLIC PROCESS%GOBP%GO:0019752	0.000262192	0.00372098	-1	ENO3,SEPHS1,PM20D2,GLUD2,DBI,FASN,BTD,IDH2,MTHFD2,PCK2,ACACB,HADHA,DECR1,MTHFR,HK3,ALDH6A1,ME3,GCLM,RARS2,SHMT1,GPI,IDH1,HADHB,ALDOC,GSTP1,MTHFD2L,PTGES3,CPT2,THAP4,AASDHPPT,FOXK2,OSBPL1A,PGD,ACAT1,ALDOA,ACSF2,GLUL,ADH5,FARSB,RGN,BCO2,GSTM2,PEPD,THEM4,ASL,BCKDHB,MDH1,CARS2,PARK7,HSD17B4,AKR1D1,PTGR1,GAMT,PFKM,GCAT,PFKFB1,MCCC2,SDHAF3,MPST,LDHB,ENO1,HLCS,GRHPR,ACADVL,TST,BCAT2,SCLY,ACOT2,GSS,GSTM4…	-2.00856	-0.435093	126	355
METABOLISM OF LIPIDS%REACTOME%R-HSA-556833.7	METABOLISM OF LIPIDS%REACTOME%R-HSA-556833.7	0.000262329	0.00372098	-1	PMVK,PLA2G12A,DBI,ABHD5,FASN,SMARCD3,FABP5,TXNRD1,FHL2,ACACB,HADHA,DECR1,PLEKHA2,ACSS3,GPD1L,PITPNB,MVD,PTDSS1,HADHB,PTGES3,CPT2,CTSA,CPTP,PSAP,CRLS1,PPP1CC,PLIN1,STARD7,OSBPL1A,GGPS1,LCLAT1,BDH1,ACAT1,MVK,MED29,ACSF2,FDPS,FDX1,GC,HMGCS2,THEM4,MED23,PIP4K2C,PPP1CA,GPD1,HSD17B4,AKR1D1,PTGR1,AGT,IDI1,GBA,ACBD6,ACADVL,LPCAT4,ACOT2,GSTM4,SUMO2,ECHS1,ANGPTL4,PLA2G4C,FABP4,GPD2,ACAA2,STARD10,PNPLA2,PPT…	-1.47589	-0.319639	105	358
ORGANIC ACID METABOLIC PROCESS%GOBP%GO:0006082	ORGANIC ACID METABOLIC PROCESS%GOBP%GO:0006082	0.000262398	0.00372098	-1	ENO3,SEPHS1,PM20D2,GLUD2,DBI,FASN,BTD,IDH2,MTHFD2,PCK2,ACACB,HADHA,DECR1,MTHFR,HK3,ALDH6A1,ME3,GCLM,RARS2,SHMT1,GPI,IDH1,HADHB,ALDOC,GSTP1,MTHFD2L,PTGES3,CPT2,THAP4,AASDHPPT,FOXK2,OSBPL1A,PGD,ACAT1,ALDOA,ACSF2,GLUL,ADH5,FARSB,RGN,BCO2,GSTM2,PEPD,THEM4,ASL,BCKDHB,MDH1,CARS2,PARK7,HSD17B4,AKR1D1,PTGR1,GAMT,PFKM,GCAT,PFKFB1,MCCC2,SDHAF3,MPST,LDHB,ENO1,HLCS,GRHPR,ACADVL,TST,BCAT2,SCLY,ACOT2,GSS,GSTM4…	-1.97191	-0.426263	129	366
OXOACID METABOLIC PROCESS%GOBP%GO:0043436	OXOACID METABOLIC PROCESS%GOBP%GO:0043436	0.00026295	0.00372098	-1	ENO3,SEPHS1,PM20D2,GLUD2,DBI,FASN,BTD,IDH2,MTHFD2,PCK2,ACACB,HADHA,DECR1,MTHFR,HK3,ALDH6A1,ME3,GCLM,RARS2,SHMT1,GPI,IDH1,HADHB,ALDOC,GSTP1,MTHFD2L,PTGES3,CPT2,THAP4,AASDHPPT,FOXK2,OSBPL1A,PGD,ACAT1,ALDOA,ACSF2,GLUL,ADH5,FARSB,RGN,BCO2,GSTM2,PEPD,THEM4,ASL,BCKDHB,MDH1,CARS2,PARK7,HSD17B4,AKR1D1,PTGR1,GAMT,PFKM,GCAT,PFKFB1,MCCC2,SDHAF3,MPST,LDHB,ENO1,HLCS,GRHPR,ACADVL,TST,BCAT2,SCLY,ACOT2,GSS,GSTM4…	-1.98193	-0.428809	128	363
METABOLISM OF RNA%REACTOME DATABASE ID RELEASE 81%8953854	METABOLISM OF RNA%REACTOME DATABASE ID RELEASE 81%8953854	0.000271297	0.00382566	-1	PPIL1,PSME2,APOBEC2,CD2BP2,TRMU,PSMA4,RPS15A,EIF4E,POLDIP3,NUP43,POLR2G,PSME1,TRMT6,TP53RK,RPS13,PSMD14,LAGE3,PSMB6,ZBTB8OS,ZFP36L1,TSEN15,NOL9,SNRPG,PSMA1,PAPOLA,TRMT1,RPS18,PSMB3,PSMA7,CSTF1,WDR36,PSMB4,TPRKB,PPP2CA,RPS9,PSMC2,DDX47,PSMB7,SNRPB2,PRKCD,PSMA6,MAGOH,UTP15,EIF4A1,DDX39A,TRMT112,NIP7,RPS16,PSMB2,RPS7,PSMA2,PPIH,PSMD7,NCBP2,TFB1M,CDC40,SNRPD3,NT5C3B,EDC3,POLR2H,SNRPA1,TRMT61B,MAPK14,…	-1.82231	-0.385166	236	475
POSITIVE REGULATION OF SIGNALING%GOBP%GO:0023056	POSITIVE REGULATION OF SIGNALING%GOBP%GO:0023056	0.000314218	0.00441548	1	MID1,IGF1R,SYNPO2L,TGM2,C1QTNF3,RTN4,TGFB2,TNFSF12,LAMB2,ANO1,MUL1,ROR1,STX4,TGFB1,INHBE,PKD2,NOTCH2,SLC9A3R1,ITGB3,TPD52L1,GLIPR2,CAV1,MCU,TRPM4,HBEGF,FLNA,RAB34,IGF2,PIBF1,SLC9A1,COL3A1,MIB2,ADAM17,ECE1,PPP3CC,SNCA,CAV2,TAOK3,DCN,NRP1,HOMER1,PDGFRB,GLUD1,ANKRD1,ITGAV,HIP1,SMCR8,LAMA2,MAPRE2,BAD,RPTOR,AKAP13,PTGIS,CD74,INSR,ECM1,TAOK1,SMAD2,RELN,ACTN4,GJA1,MAP4K4,DMTN,CDKN2AIP,MYO1C,ANXA2,CBL,HL…	1.48132	0.323947	132	489
POSITIVE REGULATION OF CELL COMMUNICATION%GOBP%GO:0010647	POSITIVE REGULATION OF CELL COMMUNICATION%GOBP%GO:0010647	0.000315358	0.00441611	1	MID1,IGF1R,SYNPO2L,TGM2,C1QTNF3,RTN4,TGFB2,TNFSF12,LAMB2,ANO1,MUL1,ROR1,STX4,TGFB1,INHBE,PKD2,NOTCH2,SLC9A3R1,ITGB3,TPD52L1,GLIPR2,CAV1,MCU,TRPM4,HBEGF,FLNA,RAB34,TRDN,IGF2,PIBF1,SLC9A1,COL3A1,MIB2,ADAM17,PPP3CC,CAV2,TAOK3,DCN,NRP1,HOMER1,PDGFRB,GLUD1,ANKRD1,ITGAV,HIP1,SMCR8,LAMA2,MAPRE2,BAD,RPTOR,AKAP13,PTGIS,CD74,INSR,ECM1,TAOK1,SMAD2,RELN,ACTN4,GJA1,MAP4K4,DMTN,CDKN2AIP,MYO1C,CBL,HLA-DRB1,COL1…	1.43922	0.31514	127	484
CELLULAR RESPONSE TO ORGANIC SUBSTANCE%GOBP%GO:0071310	CELLULAR RESPONSE TO ORGANIC SUBSTANCE%GOBP%GO:0071310	0.000316656	0.00441894	1	HSPA2,IGF1R,PPBP,TGM2,IGFBP5,TGFB2,MUL1,GNAO1,FYN,GNA14,DPYSL3,TGFB1,CACNA2D1,PKD2,CILP,RAB31,LTBP2,RAB35,CAV1,FMOD,FLNA,ATP2B4,EPHA3,IL33,PF4,IGF2,CLEC3B,SLC9A1,GNAI1,KIDINS220,ITGB5,COL3A1,RARRES2,SNCA,CAV2,PRKAA2,NRP1,MTOR,PDGFRB,ANKRD1,RPTOR,ENPP1,PTGIS,RAP1B,NFKBIB,VIM,GNA11,INSR,COL1A2,PHOX2B,SMAD2,NCOA2,ACTN4,GJA1,DMTN,MYO1C,CBL,RAB11FIP5,CD44,CAMK2A,PTK7,SORT1,STAT5B,TOR1A,PXN,ZBTB20,CALC…	1.4535	0.318478	122	483
MICROTUBULE CYTOSKELETON ORGANIZATION%GOBP%GO:0000226	MICROTUBULE CYTOSKELETON ORGANIZATION%GOBP%GO:0000226	0.000345304	0.00461079	1	MID1,DAG1,FBXW11,EML4,BICD1,TUBB8,DCLK2,PKD2,FLNA,SPIRE1,TRDN,DST,PIBF1,CENPA,DOCK7,MAP4,PHLDB2,TUBB1,MARK1,MAPRE2,NDE1,MAP2,TPPP3,CLIP2,TUBGCP6,TAOK1,GJA1,MECP2,CUL9,LLGL1,ITGB1,STMN1,TUBB4B,CAMSAP1,AKAP9,TUBB,MAP7D3,RHOA,DYNC1H1,CCSER2,MAP1A,ATXN3,PPP1R12A,KIF3B,TUBA8,TUBA1A,KPNB1,DLG1,STAG2,LMNA,CLASP1,SLK,EML3,CUL7,MAP7D1,TUBA4A,HDAC3,TBCD,FER,HOOK2,CKAP5,HTT,INPPL1,PEX14	1.61856	0.390651	64	176
POSITIVE REGULATION OF CELL ADHESION%GOBP%GO:0045785	POSITIVE REGULATION OF CELL ADHESION%GOBP%GO:0045785	0.000348736	0.00461079	1	CD55,TGM2,TGFB2,LAMB2,TJP1,COL16A1,FYN,STX4,CD46,RIN2,RRAS,UTRN,ABI3BP,CAV1,FLNA,MAGI1,IGF2,FLOT2,SIRPB1,NRP1,ITGAV,THY1,LAMA2,MYADM,STX3,PIEZO1,MAP4K4,DMTN,HLA-DRB1,ROCK1,FRMD5,CD44,HRG,PTPN23,FLOT1,MMRN1,HLA-DPA1,LIMS1,NID1,PTPN11,NPNT,RHOA,TRIOBP,FBLN2,ACTB,FERMT2,NCK1,ILK,PRKD2,DOCK5,TYK2,CHRD,CD81,NCK2,DOCK1,MYOC,LAMC1,FGG,CXCL12,ARID2	1.76461	0.432735	60	155
CATION TRANSPORT%GOBP%GO:0006812	CATION TRANSPORT%GOBP%GO:0006812	0.000350263	0.00461079	1	ATP2A3,CYBRD1,SLC25A23,ANO1,TRPV2,FYN,ARHGAP1,CACNA2D1,COX15,PKD2,CAV1,MCU,TRPM4,FLNA,ITPR1,ATP2B4,TRDN,SFXN3,JPH2,SLC9A1,SNCA,ITGAV,SNAP23,SLC4A4,PIEZO1,SLC12A7,SCN7A,CAMK2A,HRG,CALCRL,TCIRG1,ATP2B1,RALBP1,KCNA4,ANO6,PSEN1,ATP1B3,ORAI1,SLC12A4,TMEM165,SLC32A1,ATP1A3,STIM1,LMTK2	1.70383	0.420834	44	147
ION TRANSMEMBRANE TRANSPORT%GOBP%GO:0034220	ION TRANSMEMBRANE TRANSPORT%GOBP%GO:0034220	0.00035292	0.00461079	1	SLC4A1,ATP2A3,SLC25A23,ANO1,TRPV2,TPCN1,CACNA2D1,COX15,PKD2,MCU,TRPM4,FLNA,ITPR1,ATP2B4,TRDN,SFXN3,SLC25A6,JPH2,SLC9A1,MPC2,SLC20A2,ITGAV,SLC4A4,GJA1,SLC12A7,SCN7A,TCIRG1,ATP2B1,ANXA6,KCNA4,ANO6,ATP1B3,ORAI1,SLC12A4,TMEM165,ATP1A3	1.7244	0.428108	36	142
TAXIS%GOBP%GO:0042330	TAXIS%GOBP%GO:0042330	0.000353045	0.00461079	1	PPBP,DAG1,TGFB2,EPHB4,FYN,SEMA3D,PLXNA1,LAMA5,NOTCH2,ITGB3,TRPM4,HBEGF,EPHA3,PF4,SEMA5B,CYFIP1,KALRN,NRP1,PDGFRB,ITGAV,NFASC,LAMA2,MYCBP2,PTN,SEMA3C,ARHGAP35,RELN,NPTN,LAMA3,S1PR1,PLXNB2,ENAH,RALBP1,SCRIB,PIP5K1C,CORO1B,APP,RHOA,PLXNA2,GPNMB,PTPRM	1.69217	0.423723	41	133
CHEMOTAXIS%GOBP%GO:0006935	CHEMOTAXIS%GOBP%GO:0006935	0.000353045	0.00461079	1	PPBP,DAG1,TGFB2,EPHB4,FYN,SEMA3D,PLXNA1,LAMA5,NOTCH2,ITGB3,TRPM4,HBEGF,EPHA3,PF4,SEMA5B,CYFIP1,KALRN,NRP1,PDGFRB,ITGAV,NFASC,LAMA2,MYCBP2,PTN,SEMA3C,ARHGAP35,RELN,NPTN,LAMA3,S1PR1,PLXNB2,ENAH,RALBP1,SCRIB,PIP5K1C,CORO1B,APP,RHOA,PLXNA2,GPNMB,PTPRM	1.69217	0.423723	41	133
LOCOMOTION%GOBP%GO:0040011	LOCOMOTION%GOBP%GO:0040011	0.000353419	0.00461079	1	PPBP,DAG1,TGFB2,EPHB4,FYN,SEMA3D,PLXNA1,LAMA5,NOTCH2,ITGB3,TRPM4,HBEGF,EPHA3,PF4,SEMA5B,CYFIP1,KALRN,NRP1,PDGFRB,ITGAV,NFASC,LAMA2,MYCBP2,PTN,SEMA3C,ARHGAP35,RELN,NPTN,LAMA3,S1PR1,PLXNB2,ENAH,RALBP1,SCRIB,PIP5K1C,CORO1B,APP,RHOA,PLXNA2,GPNMB,PTPRM	1.68531	0.420646	41	136
CELL MORPHOGENESIS INVOLVED IN NEURON DIFFERENTIATION%GOBP%GO:0048667	CELL MORPHOGENESIS INVOLVED IN NEURON DIFFERENTIATION%GOBP%GO:0048667	0.000353482	0.00461079	1	DAG1,SDC2,S100A6,EPHB4,FYN,SEMA3D,FARP1,PLXNA1,LAMA5,NOTCH2,EPHA3,SEMA5B,CYFIP1,DOCK7,KALRN,NRP1,NFASC,LAMA2,MYCBP2,PTN,MAP2,SEMA3C,ARHGAP35,PHOX2B,RELN,NPTN,LAMA3,PLXNB2,LLGL1,ENAH,RAB10,SPG11,APP,PLXNA2,ACTB,MAP1A,PTPRM,RAB8A,MYPN,LMTK2,COBL,APBB1,USP9X,RHOG,PTK2,TAOK2,APLP2,WASL,CXCL12,TBCD,BSG,VASP	1.80651	0.461658	52	114
DISEASES OF METABOLISM%REACTOME%R-HSA-5668914.6	DISEASES OF METABOLISM%REACTOME%R-HSA-5668914.6	0.000353982	0.00461079	1	ADAMTSL3,HPRT1,DAG1,SDC2,CFP,DPM3,THSD4,DPM1,FMO3,AGRN,HSPG2,BGN,NOTCH2,THBS2,VCAN,FMOD,OGN,EXT2,SEMA5B,GYS1,PRELP,LUM,DCN	1.72827	0.445082	23	108
AXON DEVELOPMENT%GOBP%GO:0061564	AXON DEVELOPMENT%GOBP%GO:0061564	0.000353982	0.00461079	1	DAG1,RTN4,S100A6,EPHB4,FYN,SEMA3D,PLXNA1,LAMA5,NOTCH2,EPHA3,SEMA5B,CYFIP1,DOCK7,KALRN,NRP1,NFASC,LAMA2,MYCBP2,SEMA3C,ARHGAP35,PHOX2B,RELN,NPTN,LAMA3,PLXNB2,LLGL1,ENAH,RAB10,SPG11,APP,PLXNA2,ACTB,MAP1A,PTPRM,CRTAC1,RAB8A,MYPN,LMTK2,COBL,APBB1,USP9X,RHOG,PTK2,TAOK2,APLP2	1.73675	0.447266	45	108
TRANSMEMBRANE RECEPTOR PROTEIN TYROSINE KINASE SIGNALING PATHWAY%GOBP%GO:0007169	TRANSMEMBRANE RECEPTOR PROTEIN TYROSINE KINASE SIGNALING PATHWAY%GOBP%GO:0007169	0.00035417	0.00461079	1	IGF1R,EPHB4,ROR1,FYN,COL4A2,TGFB1,ABI1,COL4A6,HBEGF,EPHA3,IGF2,ADAM17,RARRES2,CAV2,KALRN,NRP1,PDGFRB,INSR,SAMD12,MYO1C,CBL,PDCD6,SORT1,STAT5B,PXN,STMN1,PTPN11,PTPN2,DAB2IP,RAPGEF1,GIGYF1,VAV2,EFEMP1,SORBS1,PLAT,RAB14,LMTK2,PRKD2,REPS2,EGFR,TYK2,FGF1,DDR1,NCK2,PTK2,MYOC,FLT1,PLCG1	1.75357	0.444853	48	121
REGULATION OF NEURON PROJECTION DEVELOPMENT%GOBP%GO:0010975	REGULATION OF NEURON PROJECTION DEVELOPMENT%GOBP%GO:0010975	0.00035461	0.00461079	1	RTN4,SDC2,ROR1,SEMA3D,DPYSL3,PLXNA1,DBNL,PTPN9,CAMK2G,EPHA3,SEMA5B,KIDINS220,NRP1,DBN1,CAMK2B,MARK1,SS18L1,THY1,MYCBP2,PTN,GOLGA4,MAP2,SEMA3C,ARHGAP35,RELN,NPTN,PTK7,PLXNB2,PSEN1,PLXNA2,APOE,DAB2IP,RAPGEF1,ITGA6	1.7581	0.452472	34	109
SECRETION%GOBP%GO:0046903	SECRETION%GOBP%GO:0046903	0.000354736	0.00461079	1	ANK1,ANO1,SYNGR1,STX4,SLC9A3R1,RAB31,LTBP2,CADPS,CAMK2G,CANX,SNCA,EXOC2,RAB8B,STX3,SNAP23,ACE,STX1A,GJA1,DMTN,RAB11FIP5,USE1,S100A13,CPLX1,RAB10,VAMP3,NSF,PIP5K1C,FBLN5,RCN3,EXOC7,UNC13B,EXOC3,RAB8A,SLC32A1,VAMP7,DNAJC5,STX11,MYH9,PREB,SEL1L,VPS18,EXOC6B,FGG,EXOC5,TPD52,EXOC4,EXOC1,RAB1A,SDF4,LYN,SNAP29,STX2,UNC13D,PNPLA8,VTI1B,SCRN1,AP1G1,RAB13	1.73592	0.443351	58	115
FOCAL ADHESION: PI3K-AKT-MTOR-SIGNALING PATHWAY%WIKIPATHWAYS_20220510%WP3932%HOMO SAPIENS	FOCAL ADHESION: PI3K-AKT-MTOR-SIGNALING PATHWAY%WIKIPATHWAYS_20220510%WP3932%HOMO SAPIENS	0.000354925	0.00461079	1	IGF1R,ITGB4,THBS4,LAMB2,COL4A1,COL4A2,LAMA5,COMP,THBS2,COL4A6,ITGB3,GYS1,ITGB5,COL3A1,PRKAA2,MTOR,ITGAV,BAD,INSR,COL1A2,RELN,COL1A1,LAMA3,ITGB1,THBS3,ITGA7,RAB10,SLC2A4,PIK3C2B,LAMA4,RPS6KB2,ITGA6,RAB14,RAB8A,PIK3R4,PRKAA1,COL5A3	1.69619	0.434781	37	112
METAL ION TRANSPORT%GOBP%GO:0030001	METAL ION TRANSPORT%GOBP%GO:0030001	0.000354925	0.00461079	1	ATP2A3,CYBRD1,SLC25A23,TRPV2,FYN,ARHGAP1,CACNA2D1,PKD2,CAV1,MCU,TRPM4,FLNA,ITPR1,ATP2B4,TRDN,JPH2,SLC9A1,ITGAV,SLC4A4,SLC12A7,SCN7A,CAMK2A,HRG,CALCRL,ATP2B1,KCNA4,ANO6,PSEN1,ATP1B3,ORAI1,SLC12A4,TMEM165,ATP1A3,STIM1,LMTK2	1.74897	0.448309	35	112
REGULATION OF CELL MORPHOGENESIS%GOBP%GO:0022604	REGULATION OF CELL MORPHOGENESIS%GOBP%GO:0022604	0.000355366	0.00461079	1	DAG1,FYN,MYH10,PLXNA1,SH3D19,SLC9A3R1,DBNL,FMNL3,STRIP1,FLNA,NRP1,DBN1,CAMK2B,SS18L1,MYADM,CORO1C,RELN,ACTN4,DMTN,CD44,CDC42EP1,PLXNB2,LIMS1,CAMSAP1,CORO1B,RHOA,PLXNA2,TRIOBP,ARAP1,FERMT2,GBP1,DLG1,PRKDC,ILK,MOV10,DOCK5,FGD5,RHOG,MYH9,PTK2,PDZD8,TAOK2,DOCK1,MYOC,PARVB,CUL7	1.7748	0.449228	46	123
POSITIVE REGULATION OF MAPK CASCADE%GOBP%GO:0043410	POSITIVE REGULATION OF MAPK CASCADE%GOBP%GO:0043410	0.000355429	0.00461079	1	MID1,IGF1R,TGFB2,ROR1,TGFB1,NOTCH2,TPD52L1,GLIPR2,IGF2,CAV2,TAOK3,NRP1,PDGFRB,CD74,INSR,TAOK1,HLA-DRB1,ROCK1,CD44,RELL1,STK25,PTPN11,NPNT,APP,APOE,DAB2IP,GPNMB,FERMT2,FZD7,TRAF5,ARRB1,PRKD2,EGFR,FGF1,CD81,RAF1,TAOK2,FLT1,XIAP,FGG,PLCG2,IQGAP1,IGFBP6,FGB,MAP3K5	1.782	0.457964	45	110
INORGANIC ION TRANSMEMBRANE TRANSPORT%GOBP%GO:0098660	INORGANIC ION TRANSMEMBRANE TRANSPORT%GOBP%GO:0098660	0.000355682	0.00461079	1	SLC4A1,ATP2A3,SLC25A23,ANO1,TRPV2,CACNA2D1,COX15,PKD2,MCU,TRPM4,FLNA,ITPR1,ATP2B4,TRDN,JPH2,SLC9A1,SLC20A2,ITGAV,SLC4A4,SLC12A7,SCN7A,TCIRG1,ATP2B1,KCNA4,ANO6,ATP1B3,ORAI1,SLC12A4,TMEM165,ATP1A3	1.81149	0.468647	30	105
INFLAMMATION MEDIATED BY CHEMOKINE AND CYTOKINE SIGNALING PATHWAY%PANTHER PATHWAY%P00031	INFLAMMATION MEDIATED BY CHEMOKINE AND CYTOKINE SIGNALING PATHWAY%PANTHER PATHWAY%P00031	0.00035823	0.00461079	1	PLCB4,COL12A1,GNAO1,GNA14,MYH10,CASK,RRAS,COL6A1,ITPR1,PF4,GNAI1,COL6A3,COL6A2,MYH11,GNAI2,COL14A1,GNA11,ROCK1,CAMK2A,MYLK,ITGB1,GNAQ,RHOA,ACTB,NFKB2,PLCD1,MYH7B,ITPR3,ACTG1,RHOG,MYH9,RAF1,ACTA2,CAMK2D,PLCG1,PLCG2,ARPC5,MYH14,ITPR2,MAPK1	1.82745	0.481688	40	93
REGULATION OF CELL-SUBSTRATE ADHESION%GOBP%GO:0010810	REGULATION OF CELL-SUBSTRATE ADHESION%GOBP%GO:0010810	0.000359131	0.00461079	1	COL16A1,CASK,RIN2,RRAS,UTRN,ABI3BP,FLNA,EPHA3,SLC9A1,PTPRA,NRP1,PHLDB2,THY1,MYADM,CORO1C,TLN1,ACTN4,MAP4K4,DMTN,ROCK1,HRG,DAPK3,LIMS1,NPNT,VCL,RHOA,TRIOBP,FBLN2,ATXN3,FERMT2,FZD7,PEAK1,GBP1,ILK,DOCK5,ACTG1,PTK2,CLASP1,SLK,DOCK1,MYOC,FGG,TBCD	1.79221	0.471188	43	95
REGULATION OF VASCULATURE DEVELOPMENT%GOBP%GO:1901342	REGULATION OF VASCULATURE DEVELOPMENT%GOBP%GO:1901342	0.000359518	0.00461079	1	THBS4,TGFB2,TNFSF12,TJP1,COL4A2,AGO2,RRAS,HSPG2,THBS2,EMILIN1,ATP2B4,PF4,DCN,PTGIS,ECM1,MECP2,ROCK1,PDCD6,HRG,ITGB1,AGO1,HGS,DAB2IP,GPNMB,COL4A3,PTPRM,STIM1,PRKD2,FGF1,NOS3,S100A1,FLT1,PLCG1	1.78227	0.470923	33	92
REGULATION OF ANGIOGENESIS%GOBP%GO:0045765	REGULATION OF ANGIOGENESIS%GOBP%GO:0045765	0.000359518	0.00461079	1	THBS4,TGFB2,TNFSF12,TJP1,COL4A2,AGO2,RRAS,HSPG2,THBS2,EMILIN1,ATP2B4,PF4,DCN,PTGIS,ECM1,MECP2,ROCK1,PDCD6,HRG,ITGB1,AGO1,HGS,DAB2IP,GPNMB,COL4A3,PTPRM,STIM1,PRKD2,FGF1,NOS3,S100A1,FLT1,PLCG1	1.78227	0.470923	33	92
VASCULATURE DEVELOPMENT%GOBP%GO:0001944	VASCULATURE DEVELOPMENT%GOBP%GO:0001944	0.000360166	0.00461079	1	MCAM,COL22A1,EGFL7,TGFB2,EPHB4,COL4A1,TGFB1,TGFBI,PKD2,RECK,ITGB3,CAV1,COL18A1,NRP1,PLXDC1,CALD1,JAM3,PDGFRB,ITGAV,LOXL2,THY1,COL1A2,ANXA2,COL1A1,S1PR1,MYLK,CALCRL,PXDN	1.873	0.497713	28	88
REGULATION OF EPITHELIAL CELL PROLIFERATION%GOBP%GO:0050678	REGULATION OF EPITHELIAL CELL PROLIFERATION%GOBP%GO:0050678	0.000360555	0.00461079	1	RTN4,THBS4,EGFL7,TGFB2,TNFSF12,CASK,TGFB1,NOTCH2,ITGB3,CAV1,IGF2,ADAM17,CAV2,NRP1,BAD,PTN,ECM1,PDCD6,RAB33B,CDC73,LIMS1,APOE,DAB2IP,COL4A3,PTPRM,FZD7,PRKDC,PRKD2,EGFR,FGF1,FLT1,PLCG1,LAMC1	1.73595	0.467311	33	81
RHOA GTPASE CYCLE%REACTOME%R-HSA-8980692.1	RHOA GTPASE CYCLE%REACTOME%R-HSA-8980692.1	0.000361206	0.00461079	1	MCAM,FARP1,ARHGAP1,STBD1,PLEKHG3,FMNL3,CAV1,DAAM1,ARHGEF12,TMPO,FLOT2,KALRN,AKAP13,SNAP23,ARHGAP35,ROCK1,FAF2,BCAP31,FLOT1,VAMP3,MYO9B,ARHGEF40,RHOA,EMC3,VAV2,ARAP1,PGRMC2,PREX2,SLK,ARHGEF2,PKN2,ARHGEF11,DDRGK1,IQGAP1,OBSCN,ACBD5	1.71788	0.457742	36	87
BLOOD VESSEL DEVELOPMENT%GOBP%GO:0001568	BLOOD VESSEL DEVELOPMENT%GOBP%GO:0001568	0.000361272	0.00461079	1	MCAM,COL22A1,EGFL7,TGFB2,EPHB4,COL4A1,TGFB1,TGFBI,PKD2,RECK,ITGB3,CAV1,COL18A1,NRP1,PLXDC1,CALD1,JAM3,PDGFRB,ITGAV,LOXL2,THY1,COL1A2,ANXA2,COL1A1,S1PR1,MYLK,CALCRL,PXDN	1.86982	0.500715	28	84
EMBRYONIC MORPHOGENESIS%GOBP%GO:0048598	EMBRYONIC MORPHOGENESIS%GOBP%GO:0048598	0.000361272	0.00461079	1	MFAP5,ITGB4,TGFB2,COL12A1,COL4A2,TGFB1,PKD2,ITGB3,COL6A1,IGF2,ITGB5,COL8A1,ECE1,MFAP2,ITGAV,LUZP1,MICAL2,SMAD2,ROCK1,LAMA3,PLXNB2,ITGB1,ITGA7,FBN2,CREBBP,CDC73,SCRIB	1.82115	0.487681	27	84
BLOOD VESSEL MORPHOGENESIS%GOBP%GO:0048514	BLOOD VESSEL MORPHOGENESIS%GOBP%GO:0048514	0.000364431	0.00462523	1	MCAM,COL22A1,EGFL7,TGFB2,EPHB4,COL4A1,TGFB1,TGFBI,PKD2,RECK,ITGB3,CAV1,COL18A1,NRP1,PLXDC1,CALD1,JAM3,PDGFRB,ITGAV,LOXL2,THY1,ANXA2,S1PR1,MYLK,CALCRL,PXDN	1.87267	0.509935	26	76
REGULATION OF CALCIUM ION TRANSPORT%GOBP%GO:0051924	REGULATION OF CALCIUM ION TRANSPORT%GOBP%GO:0051924	0.000364697	0.00462523	1	DMD,FYN,CACNA2D1,PKD2,CAV1,CAMK2G,TRDN,JPH2,SLC9A1,PPP3CC,SNCA,HOMER1,PDGFRB,CAMK2B,THY1,PLN,HOMER2,CAMK2A,MYLK,FMR1,ATP2B1,HOMER3,PACSIN3,AHNAK,ORAI1,VDAC1,STIM1,NPPA,CAMK2D,PLCG1,HRC,BIN1,CXCL12	1.83161	0.50199	33	74
ANGIOGENESIS%GOBP%GO:0001525	ANGIOGENESIS%GOBP%GO:0001525	0.000369754	0.00464507	1	MCAM,COL22A1,EPHB4,COL4A1,TGFBI,RECK,ITGB3,COL18A1,NRP1,PLXDC1,CALD1,JAM3,PDGFRB,ITGAV,LOXL2,THY1,ANXA2,S1PR1,CALCRL,PXDN	1.82091	0.528299	20	54
INTEGRIN-MEDIATED SIGNALING PATHWAY%GOBP%GO:0007229	INTEGRIN-MEDIATED SIGNALING PATHWAY%GOBP%GO:0007229	0.000370851	0.00464507	1	ITGB4,COL16A1,LAMA5,ITGA1,ITGB3,DST,ITGB5,COL3A1,PTPRA,NRP1,ITGAV,THY1,PTN,LAMA3,ITGA9,ITGB1,ITGA7,ITGA11,CUL3,ITGA6,FERMT2,ILK,MYH9,PTK2,DOCK1	1.969	0.591718	25	45
SEMAPHORIN INTERACTIONS%REACTOME%R-HSA-373755.1	SEMAPHORIN INTERACTIONS%REACTOME%R-HSA-373755.1	0.000375587	0.00464507	1	FYN,MYH10,DPYSL3,PLXNA1,RRAS,ITGA1,FARP2,MYH11,ARHGEF12,NRP1,ARHGAP35,TLN1,ROCK1,ITGB1,PIP5K1C,RHOA,PLXNA2,DPYSL2,MYL6	1.94206	0.59514	19	41
RHOD GTPASE CYCLE%REACTOME DATABASE ID RELEASE 81%9013405	RHOD GTPASE CYCLE%REACTOME DATABASE ID RELEASE 81%9013405	0.000376223	0.00464507	1	MCAM,ACTN1,ARHGAP1,PLXNA1,STBD1,CAV1,LMNB1,TMPO,DBN1,ARHGAP35,VAMP3,FILIP1,PGRMC2,AKAP12	1.92704	0.597587	14	39
SIGNALING BY PDGF%REACTOME DATABASE ID RELEASE 81%186797	SIGNALING BY PDGF%REACTOME DATABASE ID RELEASE 81%186797	0.000378716	0.00464507	1	THBS4,COL4A1,COL4A2,THBS2,COL6A1,COL6A3,COL6A2,PDGFRB,STAT5B,THBS3,PTPN11,COL4A3,RAPGEF1,PLAT,NCK1,NCK2,PLCG1	1.85583	0.592647	17	34
EXOCYTIC PROCESS%GOBP%GO:0140029	EXOCYTIC PROCESS%GOBP%GO:0140029	0.000379219	0.00464507	1	STX4,SNCA,EXOC2,RAB8B,STX3,SNAP23,STX1A,DMTN,RAB10,VAMP3,EXOC7,UNC13B,EXOC3,RAB8A,STX11,VPS18,EXOC6B,EXOC5,EXOC4,EXOC1,SNAP29,STX2,VTI1B,RAB13,SYNJ1,STXBP1	1.89446	0.598459	26	36
REGULATION OF BIOMINERAL TISSUE DEVELOPMENT%GOBP%GO:0070167	REGULATION OF BIOMINERAL TISSUE DEVELOPMENT%GOBP%GO:0070167	0.000380084	0.00464507	1	TGFB1,TRPM4,ASPN,TMEM119,PTN,ENPP1,ECM1,ROCK1,S1PR1,TGFB3,FBN2,ATP2B1,ANO6,RXRB,NOS3,BMP2K	1.90293	0.633084	16	28
REGULATION OF BIOMINERALIZATION%GOBP%GO:0110149	REGULATION OF BIOMINERALIZATION%GOBP%GO:0110149	0.000380084	0.00464507	1	TGFB1,TRPM4,ASPN,TMEM119,PTN,ENPP1,ECM1,ROCK1,S1PR1,TGFB3,FBN2,ATP2B1,ANO6,RXRB,NOS3,BMP2K	1.90293	0.633084	16	28
FORMATION OF PRIMARY GERM LAYER%GOBP%GO:0001704	FORMATION OF PRIMARY GERM LAYER%GOBP%GO:0001704	0.00038219	0.00464507	1	ITGB4,COL12A1,COL4A2,ITGB3,COL6A1,ITGB5,COL8A1,ITGAV,SMAD2,LAMA3,ITGB1,ITGA7,CDC73	1.88838	0.639364	13	26
POSITIVE REGULATION OF FOCAL ADHESION ASSEMBLY%GOBP%GO:0051894	POSITIVE REGULATION OF FOCAL ADHESION ASSEMBLY%GOBP%GO:0051894	0.000382336	0.00464507	1	COL16A1,NRP1,THY1,MAP4K4,ROCK1,HRG,LIMS1,FERMT2,MYOC	1.9748	0.764908	9	15
CELLULAR RESPONSE TO CATECHOLAMINE STIMULUS%GOBP%GO:0071870	CELLULAR RESPONSE TO CATECHOLAMINE STIMULUS%GOBP%GO:0071870	0.000383436	0.00464507	1	TGM2,GNAO1,GNA14,FLNA,ATP2B4,SLC9A1,SNCA,GNA11,GNAS	1.8942	0.64836	9	25
CELLULAR RESPONSE TO MONOAMINE STIMULUS%GOBP%GO:0071868	CELLULAR RESPONSE TO MONOAMINE STIMULUS%GOBP%GO:0071868	0.000383436	0.00464507	1	TGM2,GNAO1,GNA14,FLNA,ATP2B4,SLC9A1,SNCA,GNA11,GNAS	1.8942	0.64836	9	25
RESPONSE TO MONOAMINE%GOBP%GO:0071867	RESPONSE TO MONOAMINE%GOBP%GO:0071867	0.000383436	0.00464507	1	TGM2,GNAO1,GNA14,FLNA,ATP2B4,SLC9A1,SNCA,GNA11,GNAS	1.8942	0.64836	9	25
RESPONSE TO CATECHOLAMINE%GOBP%GO:0071869	RESPONSE TO CATECHOLAMINE%GOBP%GO:0071869	0.000383436	0.00464507	1	TGM2,GNAO1,GNA14,FLNA,ATP2B4,SLC9A1,SNCA,GNA11,GNAS	1.8942	0.64836	9	25
REGULATION OF BONE MINERALIZATION%GOBP%GO:0030500	REGULATION OF BONE MINERALIZATION%GOBP%GO:0030500	0.000383951	0.00464507	1	TGFB1,TRPM4,TMEM119,PTN,ENPP1,ECM1,S1PR1,TGFB3,FBN2,ATP2B1,ANO6,RXRB,BMP2K	1.95286	0.694196	13	21
DISEASES ASSOCIATED WITH O-GLYCOSYLATION OF PROTEINS%REACTOME DATABASE ID RELEASE 81%3906995	DISEASES ASSOCIATED WITH O-GLYCOSYLATION OF PROTEINS%REACTOME DATABASE ID RELEASE 81%3906995	0.000384689	0.00464507	1	ADAMTSL3,DAG1,CFP,THSD4,NOTCH2,THBS2,SEMA5B,ADAMTS4	1.96908	0.739983	8	17
PID_ARF6_TRAFFICKING_PATHWAY%MSIGDB_C2%PID_ARF6_TRAFFICKING_PATHWAY	PID_ARF6_TRAFFICKING_PATHWAY%MSIGDB_C2%PID_ARF6_TRAFFICKING_PATHWAY	0.000386623	0.00464511	1	ITGA1,EXOC2,ITGAV,ITGB1,ITGA7,VAMP3,SLC2A4,PIP5K1C,ITGA6,ASAP2,BIN1,EXOC5,ARF6,EXOC4,EXOC1,CLTC,CTNNB1	1.92664	0.679797	17	22
MAINTENANCE OF BLOOD-BRAIN BARRIER%GOBP%GO:0035633	MAINTENANCE OF BLOOD-BRAIN BARRIER%GOBP%GO:0035633	0.000386997	0.00464511	1	JAM2,DMD,TJP1,ESAM,JAM3,LAMA2,GJA1,MBP,ITGB1,VCL,ACTB,ACTG1,LAMC1	1.96951	0.719265	13	19
FATTY ACID BETA-OXIDATION%WIKIPATHWAYS_20220510%WP143%HOMO SAPIENS	FATTY ACID BETA-OXIDATION%WIKIPATHWAYS_20220510%WP143%HOMO SAPIENS	0.000413736	0.00493668	-1	DECR1,HADHB,CPT2,ACAT1,ACSS2,ACADVL,ECHS1,GPD2,GCDH,PNPLA2,CPT1A	-1.91912	-0.688037	11	19
PROTEIN NEDDYLATION%GOBP%GO:0045116	PROTEIN NEDDYLATION%GOBP%GO:0045116	0.000413736	0.00493668	-1	COPS2,NEDD8,COPS8,NAE1,COPS5,COPS4,UBE2M,UBE2F,COPS6,COPS3,UBA3,GPS1,RBX1,DCUN1D1	-1.92115	-0.688767	14	19
NUCLEOSIDE DIPHOSPHATE PHOSPHORYLATION%GOBP%GO:0006165	NUCLEOSIDE DIPHOSPHATE PHOSPHORYLATION%GOBP%GO:0006165	0.00042061	0.00500389	-1	ENO3,HK3,GPI,ALDOC,FOXK2,ALDOA,PFKM,PFKFB1,ENO1,AK1,LDHA,PGAM2,CMPK2,TPI1	-1.96703	-0.630055	14	30
NUCLEOTIDE PHOSPHORYLATION%GOBP%GO:0046939	NUCLEOTIDE PHOSPHORYLATION%GOBP%GO:0046939	0.000422208	0.00500813	-1	ENO3,HK3,GPI,ALDOC,FOXK2,ALDOA,PFKM,PFKFB1,ENO1,AK1,LDHA,PGAM2,CMPK2,TPI1	-1.90661	-0.60193	14	32
TNFR2 NON-CANONICAL NF-KB PATHWAY%REACTOME DATABASE ID RELEASE 81%5668541	TNFR2 NON-CANONICAL NF-KB PATHWAY%REACTOME DATABASE ID RELEASE 81%5668541	0.000437445	0.00517366	-1	PSME2,PSMA4,PSME1,PSMD14,PSMB6,PSMA1,PSMB3,PSMA7,PSMB4,PSMC2,PSMB7,PSMA6,PSMB2,PSMA2,PSMD7,UBE2M,PSMB8,PSMA3,PSMD5	-1.8424	-0.520798	19	53
TRANSCRIPTIONAL REGULATION BY RUNX1%REACTOME%R-HSA-8878171.3	TRANSCRIPTIONAL REGULATION BY RUNX1%REACTOME%R-HSA-8878171.3	0.00045045	0.0052964	-1	PSME2,LGALS3,SMARCD3,PSMA4,CDK6,PSME1,SMARCE1,PSMD14,PSMB6,PSMA1,PSMB3,PSMA7,PSMB4,ACTL6A,PSMC2,PSMB7,PSMA6,SMARCB1,PSMB2,PSMA2,PSMD7,PSMB8,PSMA3	-1.69866	-0.436325	23	90
ALCOHOL METABOLIC PROCESS%GOBP%GO:0006066	ALCOHOL METABOLIC PROCESS%GOBP%GO:0006066	0.00045045	0.0052964	-1	PMVK,IMPA2,RETSAT,IDH2,PCK2,ITPKB,MVD,IDH1,HMGCR,SCARF1,OSBPL1A,NUDT4,MVK,FDX1,ALDH2,ACSS2,PARK7,AKR1D1,GBA,ITPK1,GOT1,PGP,ADH1B,GPD2,ACAA2,PTEN,RBP4,TPI1,AKR1B1,ASAH1,QDPR,IMPA1	-1.6641	-0.422374	32	96
CELLULAR RESPONSE TO STARVATION%REACTOME DATABASE ID RELEASE 81%9711097	CELLULAR RESPONSE TO STARVATION%REACTOME DATABASE ID RELEASE 81%9711097	0.000457247	0.00532586	-1	RPS15A,ATP6V1D,RPS13,MIOS,RPS18,RPS9,RPS16,RPS7,ATP6V1G1,RPS4X,RPS17,RPLP2,EIF2S1,ATP6V0D1,EIF2S3,RPS12,RPS3,RPS20,RPS24,ATP6V1E1,RPL23,RPS27,ATP6V1H,RPSA,ATP6V1F,RPS21,RHEB,RPS15,SESN1,RPS2,RPS29,RRAGC,RPS5,ATP6V1G2,RPLP0,RRAGD,WDR59,EIF2S2,SZT2,RPL18A,RPS19,RPL37,FLCN,ASNS,ATP6V1A,RPL37A,RPL8,LAMTOR2,RPL34,RPLP1,RPL5,RPS28,RPL3L,RPL27A,RPS11,RPL12,RPL13,RPL29,RPL35A,RPS10,RPL11,RPL10A,RPL6,RPS3…	-1.63685	-0.404554	69	116
CARBOXYLIC ACID CATABOLIC PROCESS%GOBP%GO:0046395	CARBOXYLIC ACID CATABOLIC PROCESS%GOBP%GO:0046395	0.00045798	0.00532586	-1	PM20D2,GLUD2,PCK2,HADHA,DECR1,ALDH6A1,SHMT1,HADHB,CPT2,AASDHPPT,PGD,ACAT1,GLUL,BCKDHB,HSD17B4,MCCC2,ACADVL,GOT1,ECHS1,ACAA2,GCDH,ECI2,GCSH,NAGK,HIBADH,ALDH1L1,ACOT8,ADIPOQ,SCP2,ACAT2,QDPR,PCCB,BCKDHA,ALDH5A1,AASS,HADH,AUH,MTHFS	-1.71827	-0.423725	38	118
CELLULAR RESPIRATION%GOBP%GO:0045333	CELLULAR RESPIRATION%GOBP%GO:0045333	0.000458295	0.00532586	-1	ME3,NDUFS7,COX6A2,NDUFA12,UQCC3,UQCRH,COQ10A,UQCRB,MDH1,NDUFA10,NDUFB7,NDUFA6,UQCRQ,GPD2,NDUFAB1,FH,NDUFV2,NDUFB3,NDUFA5,MDH2,NDUFA4,UQCR11,COA6,SUCLG2,LYRM7,NDUFB9,NDUFS3,UQCRC1,UQCR10,SUCLA2,NDUFA11,MT-ND1,NDUFA9,MT-ATP6,ETFDH,NDUFS6,NDUFS1,SUCLG1,NDUFS8,ACO1,NDUFS4,NDUFB6,NDUFC2,NDUFS2,ETFB,NDUFV1,NDUFB8,COX5B,NDUFAF1,ACO2,COQ10B,COX5A,COX6B1,NDUFB4,NDUFA2,NDUFS5	-1.66094	-0.411173	56	115
DNA REPAIR%REACTOME%R-HSA-73894.3	DNA REPAIR%REACTOME%R-HSA-73894.3	0.000458716	0.00532586	-1	RCHY1,KPNA2,COPS2,POLR2G,UBE2N,COPS8,CDK2,FTO,ACTL6A,RUVBL1,ERCC1,COPS5,COPS4,UBE2V2,PPP4C,WDR48,POLR2H,SUMO2,TP53BP1,PPP4R2,USP10,COPS6,ALKBH3,UBE2B,CUL4B,COPS3,USP7,GPS1,POLR2J,UBXN1,PCNA,BAZ1B,ASCC1,APEX1,RBX1,EP300,RPA3,XRCC5,XRCC6,NHEJ1,ISY1,BRCC3,COPS7A,TDP2	-1.68792	-0.41995	44	111
PURINE NUCLEOSIDE TRIPHOSPHATE METABOLIC PROCESS%GOBP%GO:0009144	PURINE NUCLEOSIDE TRIPHOSPHATE METABOLIC PROCESS%GOBP%GO:0009144	0.000459559	0.00532586	-1	ENO3,SAMHD1,HK3,NDUFS7,GPI,ALDOC,NDUFA12,IMPDH1,FOXK2,OLA1,ALDOA,MYH6,PFKM,PFKFB1,NDUFA10,NDUFB7,ENO1,MFN1,NDUFA6,HSPA1B,LDHA,PGAM2,NDUFAB1,NDUFV2,NDUFB3,NDUFA5,TPI1,NUDT16,IMPDH2,NUDT15,NDUFB9,NDUFS3,NDUFA11,MT-ND1,NDUFA9,MT-ATP6,PKM,NDUFS6,NDUFS1,NDUFS8,NDUFS4,NDUFB6,NDUFC2,NDUFS2,GAPDH,PARG,NDUFV1,NDUFB8,MYH3	-1.68446	-0.420483	49	108
DEUBIQUITINATION%REACTOME DATABASE ID RELEASE 81%5688426	DEUBIQUITINATION%REACTOME DATABASE ID RELEASE 81%5688426	0.000462535	0.00534499	-1	PSME2,PSMA4,PSME1,NEDD8,ADRM1,PSMD14,PSMB6,FOXK2,PSMA1,PSMB3,PSMA7,USP8,PSMB4,ACTL6A,RUVBL1,PSMC2,PSMB7,PSMA6,PSMB2,PSMA2,PSMD7,WDR48,USP14,SMAD4,PSMB8,USP10,PSMA3,SENP8,PSMD5,PTEN,OTUB1,USP2,OGT,USP47,PSMC1,USP7,UCHL5,TAB1,UCHL3,USP16,NFKBIA,KEAP1,USP19,EP300,PSMC5,TOMM20	-1.66094	-0.404687	46	129
SMALL MOLECULE BIOSYNTHETIC PROCESS%GOBP%GO:0044283	SMALL MOLECULE BIOSYNTHETIC PROCESS%GOBP%GO:0044283	0.000474947	0.00547274	-1	PMVK,SEPHS1,GLUD2,FASN,PCK2,ACACB,ITPKB,MTHFR,ACSS3,MVD,SHMT1,GPI,GSTP1,PTGES3,HMGCR,AASDHPPT,OSBPL1A,COQ10A,MVK,GLUL,RGN,HMGCS2,GSTM2,ASL,PARK7,AKR1D1,COQ6,GAMT,PFKFB1,GBA,BCAT2,GSTM4,GOT1,PGP,ACAA2,COQ9,NDUFAB1,ADI1,CYP7B1,ACOT8,RBP4,TPI1,SCP2,AKR1B1,ASAH1,QDPR,RFK,ELOVL1,LTA4H,ASS1,AASS,MRI1,ALDH1A1,SRD5A3	-1.51951	-0.353784	54	180
RIBONUCLEOTIDE METABOLIC PROCESS%GOBP%GO:0009259	RIBONUCLEOTIDE METABOLIC PROCESS%GOBP%GO:0009259	0.000484144	0.00556283	-1	ENO3,PMVK,HINT1,ACACB,HK3,MVD,NDUFS7,GPI,ALDOC,NDUFA12,IMPDH1,FOXK2,OLA1,PDE2A,NUDT4,ACAT1,MVK,ALDOA,ACSF2,MYH6,HMGCS2,ACSS2,HSD17B4,PFKM,PFAS,PFKFB1,NDUFA10,NDUFB7,ENO1,MFN1,ADSL,NDUFA6,ACOT2,NUDT18,PAPSS2,HSPA1B,LDHA,GCDH,PGAM2,PPT1,NDUFAB1,NDUFV2,NDUFB3,ACOT8,GMPS,NDUFA5,TPI1,IMPDH2,RFK,ELOVL1,SUCLG2,GART,NDUFB9,NDUFS3,NT5C1A,PANK4,FAR1,APRT,SUCLA2,NDUFA11,MT-ND1,NDUFA9,MT-ATP6,PKM,NDUFS6,NDUF…	-1.5038	-0.34652	82	200
NEGATIVE REGULATION OF MULTICELLULAR ORGANISMAL PROCESS%GOBP%GO:0051241	NEGATIVE REGULATION OF MULTICELLULAR ORGANISMAL PROCESS%GOBP%GO:0051241	0.000495868	0.00568135	1	JAM2,C1QTNF3,RTN4,THBS4,TGFB2,MUL1,COL4A2,SEMA3D,TGFB1,APOC1,HSPG2,THBS2,IL17D,EMILIN1,TRPM4,NPR3,SSC5D,ATP2B4,PF4,KLKB1,SEMA5B,PIBF1,ADAM17,ASPN,F11,DOCK7,DCN,TMEM119,ACOT11,LOXL2,MARK1,CD9,THY1,PTN,APOA4,MAP2,ENPP1,SERPINE2,PLN,SEMA3C,CORO1C,ECM1,HOMER2,LRRC17,GJA1,MECP2,HLA-DRB1,RAB11FIP5,ROCK1,NPTN,ANXA4,HRG,PTPN23,CHID1,TGFB3,ATP2B1,AGO1,HGS,TLR3,LAMA4,WNT9B,PTPN11,HOMER3,INPP5D,RHOA,PTPN2,A…	1.57096	0.361561	83	268
ORGANELLE LOCALIZATION%GOBP%GO:0051640	ORGANELLE LOCALIZATION%GOBP%GO:0051640	0.000500417	0.00571723	1	FBXW11,MYO1D,EML4,BICD1,MUL1,STX4,SLC9A3R1,CENPC,KIF13A,SPIRE1,RAB34,PIBF1,CENPA,LMNB1,CAV2,EXOC2,DOCK7,RAB8B,MAP4,MTOR,MARK1,TRAPPC3,NDE1,STX3,SNAP23,PEF1,STX16,STX1A,ACTN4,GJA1,MYO1C,PDCD6,S100A13,TOR1A,LLGL1,ITGB1,CUL3,RAB10,STK25,KIFAP3,VAMP3,PLEKHM1,SPG11,AKAP9,TRIP11,DYNC1H1,EXOC7,UNC13B,EXOC3,KIF3B,RAB8A,STX12,SEH1L,KPNB1,STX7,DLG1,RAB6A,STX11,LMNA,TBC1D23,AP3B1,MYH9,DNM2,STX10,CLASP1,PDZD…	1.59635	0.371173	88	246
NUCLEOBASE-CONTAINING SMALL MOLECULE METABOLIC PROCESS%GOBP%GO:0055086	NUCLEOBASE-CONTAINING SMALL MOLECULE METABOLIC PROCESS%GOBP%GO:0055086	0.000512689	0.00584089	-1	ENO3,PMVK,HINT1,IDH2,NANS,ACACB,SAMHD1,GPD1L,HK3,ALDH6A1,MVD,NDUFS7,SHMT1,GPI,IDH1,ALDOC,NDUFA12,AK6,NAMPT,IMPDH1,FOXK2,OLA1,PGD,PDE2A,NUDT4,NADSYN1,ACAT1,MVK,ALDOA,ACSF2,MYH6,UAP1,HMGCS2,ACSS2,MDH1,PARK7,HSD17B4,PFKM,PFAS,PFKFB1,NDUFA10,NDUFB7,ENO1,MFN1,ADSL,NDUFA6,ACOT2,NUDT18,PAPSS2,AK1,TYMP,TALDO1,HSPA1B,LDHA,GCDH,PGAM2,PPT1,NDUFAB1,CMPK2,GALT,NDUFV2,ALDH1L1,NDUFB3,ACOT8,GMPS,RRM2B,NDUFA5,TPI…	-1.45707	-0.319646	84	309
RESPONSE TO WOUNDING%GOBP%GO:0009611	RESPONSE TO WOUNDING%GOBP%GO:0009611	0.00053041	0.00597566	1	MYOF,HBB,ENTPD1,MCAM,ACTN1,ITGB4,TGFB2,DPYSL3,DCBLD2,TGFB1,RAP2B,ITGB3,FLNA,DST,PF4,COL3A1,ADAM17,DYSF,F11,NRP1,F13B,COL5A1,CD9,ARHGAP35,TLN1,CD44,TOR1A,HRG,CSRP1,GNAS,ITGB1,VKORC1,GNAQ,ANXA6,ANO6,CORO1B,VCL,RHOA,ACTB,VAV2,PLAT,FZD7,PLEC,ILK,SARM1,ACTG1,FGF1,MYH9,DDR1,RAF1	1.6424	0.408373	50	141
WOUND HEALING%GOBP%GO:0042060	WOUND HEALING%GOBP%GO:0042060	0.000530598	0.00597566	1	MYOF,HBB,ENTPD1,MCAM,ACTN1,TGFB2,DCBLD2,TGFB1,RAP2B,ITGB3,FLNA,DST,PF4,COL3A1,ADAM17,DYSF,F11,F13B,COL5A1,CD9,ARHGAP35,TLN1,CD44,TOR1A,HRG,CSRP1,GNAS,ITGB1,VKORC1,GNAQ,ANXA6,ANO6,CORO1B,VCL,RHOA,ACTB,VAV2,PLAT,FZD7,PLEC,ILK,ACTG1,FGF1,MYH9,DDR1,RAF1	1.66375	0.418424	46	128
REGULATION OF METAL ION TRANSPORT%GOBP%GO:0010959	REGULATION OF METAL ION TRANSPORT%GOBP%GO:0010959	0.000532292	0.00597566	1	DMD,FYN,CACNA2D1,UTRN,PKD2,FXYD1,SLC9A3R1,CAV1,CAMK2G,FLNA,ATP2B4,TRDN,JPH2,SLC9A1,PPP3CC,SNCA,SLMAP,HOMER1,PDGFRB,CAMK2B,THY1,PLN,HOMER2,ACTN4,CAMK2A,MYLK,ITGB1,ISCU,FMR1,ATP2B1,ANO6,HOMER3,PACSIN3,ATP1B3,AKAP9,AHNAK,ORAI1,VDAC1,DLG1,STIM1,NPPA,FHL1,YWHAH,CAMK2D,PLCG1,HRC,BIN1,CXCL12	1.70339	0.429831	48	126
LEISHMANIA INFECTION%REACTOME DATABASE ID RELEASE 81%9658195	LEISHMANIA INFECTION%REACTOME DATABASE ID RELEASE 81%9658195	0.000533523	0.00597566	1	ENTPD1,FYN,ABI1,WIPF3,ENTPD5,ITPR1,GNAI1,ADAM17,CYFIP1,GNAI2,NT5E,ADCY9,MYO1C,CALCRL,GNAS,GGT5,ACTR3,MYO9B,ACTB,ACTR2,VAV2,NFKB2,NCKIPSD,FZD7,NCK1,ITPR3,NCKAP1,ACTG1,MYH9,PTK2,ELMO2,DOCK1,PLCG1,WIPF2,WASL,PLCG2,ARPC5,ITPR2,MAPK1	1.78808	0.462592	39	105
RAC1 GTPASE CYCLE%REACTOME%R-HSA-9013149.1	RAC1 GTPASE CYCLE%REACTOME%R-HSA-9013149.1	0.000534759	0.00597566	1	MCAM,FARP1,ARHGAP1,PLEKHG3,ABI1,WIPF3,CAV1,DOCK6,FARP2,TAOK3,CYFIP1,DOCK7,TMPO,KALRN,SNAP23,ARHGAP35,CDC42EP1,ITGB1,CDC42BPA,VAMP3,MYO9B,RALBP1,SWAP70,VAV2,ARAP1,FERMT2,MPP7,DOCK5,FGD5,GNA13,NCKAP1,PREX2,DOCK1,EMD,PKN2,WIPF2,ARHGEF11,WASL	1.68092	0.436629	38	102
TISSUE MORPHOGENESIS%GOBP%GO:0048729	TISSUE MORPHOGENESIS%GOBP%GO:0048729	0.00053831	0.00597566	1	DAG1,ITGB4,TGFB2,COL4A1,TGFB1,LAMA5,PKD2,SLC9A3R1,ITGB3,FLNA,ADAM17,NRP1,COL5A1,ANKRD1,LUZP1,MICAL2,ARHGAP35,SMAD2,CD44,LAMA3,TOR1A,S1PR1,PLXNB2,MYLK,ITGB1,RAB10,SCRIB,NPNT,VCL,RHOA,ACTB,COBL,PRKD2,ACTG1,FGF1,NOS3,DDR1,TTN,ACTA2	1.64403	0.429844	39	99
CATION TRANSMEMBRANE TRANSPORT%GOBP%GO:0098655	CATION TRANSMEMBRANE TRANSPORT%GOBP%GO:0098655	0.00053831	0.00597566	1	ATP2A3,SLC25A23,TRPV2,CACNA2D1,COX15,PKD2,MCU,TRPM4,FLNA,ITPR1,ATP2B4,TRDN,SFXN3,JPH2,SLC9A1,ITGAV,SLC4A4,SLC12A7,SCN7A,TCIRG1,ATP2B1,KCNA4,ANO6,ATP1B3,ORAI1,SLC12A4,TMEM165,ATP1A3	1.64978	0.431348	28	99
AXONOGENESIS%GOBP%GO:0007409	AXONOGENESIS%GOBP%GO:0007409	0.00053831	0.00597566	1	DAG1,S100A6,EPHB4,FYN,SEMA3D,PLXNA1,LAMA5,NOTCH2,EPHA3,SEMA5B,CYFIP1,DOCK7,KALRN,NRP1,NFASC,LAMA2,MYCBP2,SEMA3C,ARHGAP35,PHOX2B,RELN,NPTN,LAMA3,PLXNB2,LLGL1,ENAH,RAB10,SPG11,APP,PLXNA2,ACTB,MAP1A,PTPRM,RAB8A,MYPN,LMTK2,COBL,APBB1,USP9X,RHOG,PTK2,TAOK2,APLP2	1.70847	0.446693	43	99
INORGANIC CATION TRANSMEMBRANE TRANSPORT%GOBP%GO:0098662	INORGANIC CATION TRANSMEMBRANE TRANSPORT%GOBP%GO:0098662	0.000539277	0.00597566	1	ATP2A3,SLC25A23,TRPV2,CACNA2D1,COX15,PKD2,MCU,TRPM4,FLNA,ITPR1,ATP2B4,TRDN,JPH2,SLC9A1,ITGAV,SLC4A4,SLC12A7,SCN7A,TCIRG1,ATP2B1,KCNA4,ANO6,ATP1B3,ORAI1,SLC12A4,TMEM165,ATP1A3	1.69266	0.447245	27	92
G PROTEIN-COUPLED RECEPTOR SIGNALING PATHWAY%GOBP%GO:0007186	G PROTEIN-COUPLED RECEPTOR SIGNALING PATHWAY%GOBP%GO:0007186	0.000540346	0.00597566	1	TGM2,PLCB4,ANO1,GNAO1,GNA14,AGRN,CAV1,FLNA,PF4,GNAI1,ECE1,ARHGEF12,HOMER1,GNAI2,ADCY9,AKAP13,GNA11,INSR,HOMER2,CAMK2A,SORT1,S1PR1,CALCRL,GNAS,GNAQ,RGS3,HOMER3,APOE,AKAP12,ITPR3,RGS6,GNA13,NPPA,PREX2	1.70373	0.447198	34	97
POSITIVE REGULATION OF CELL DEVELOPMENT%GOBP%GO:0010720	POSITIVE REGULATION OF CELL DEVELOPMENT%GOBP%GO:0010720	0.000541419	0.00597566	1	TGM2,TGFB1,PLXNA1,DBNL,FLNA,NRP1,DBN1,CAMK2B,SS18L1,BAD,PTN,GOLGA4,SERPINE2,MYADM,RELN,DMTN,NPTN,PLXNB2,LIMS1,MME,PLXNA2,TRIOBP,FERMT2,PRKDC,ILK,DOCK5,DICER1,DOCK1,MYOC,CUL7,BIN1,FGG,FGB,KDM1A	1.71845	0.461654	34	82
MEMBRANE FUSION%GOBP%GO:0061025	MEMBRANE FUSION%GOBP%GO:0061025	0.000542299	0.00597566	1	MYOF,STX4,BET1,YIPF4,RAB34,DYSF,SNCA,CAV2,RAB8B,CD9,VTI1A,YIPF5,STX3,SNAP23,SERPINA5,STX16,STX1A,TGFBRAP1,SEC22B,VAMP3,PLEKHM1,VPS41,EEA1,NSF,RABEP1,RAB8A,STX12,STX7,VAMP7,STX11,ACE2,VAPA,STX10,CHMP5,VPS18,BNIP1,VPS33A,NAPA	1.74839	0.467461	38	85
CELL-MATRIX ADHESION%GOBP%GO:0007160	CELL-MATRIX ADHESION%GOBP%GO:0007160	0.000548246	0.00602473	1	ACTN1,ITGB4,CTTN,SGCE,ITGA1,ITGB3,EMILIN1,BCAM,ITGB5,COL3A1,CDH11,NID2,ITGAV,THY1,CD44,ITGA9,ITGB1,THBS3,ITGA7,ITGA11,NPNT,VCL,FBLN5,PPFIA1,ITGA6,SORBS1,FERMT2,PEAK1,ILK	1.77976	0.50378	29	62
DEGRADATION OF THE EXTRACELLULAR MATRIX%REACTOME DATABASE ID RELEASE 81%1474228	DEGRADATION OF THE EXTRACELLULAR MATRIX%REACTOME DATABASE ID RELEASE 81%1474228	0.000563592	0.00616791	1	CAPN5,COL12A1,COL16A1,LAMA5,HSPG2,KLKB1,COL18A1,TIMP2,ADAM17,DCN,HTRA1,COL14A1,CD44,LAMA3,ADAMTS4,NID1,PSEN1	1.88437	0.57206	17	43
VESICLE DOCKING%GOBP%GO:0048278	VESICLE DOCKING%GOBP%GO:0048278	0.000564334	0.00616791	1	STX4,CAV2,EXOC2,RAB8B,STX3,STX16,STX1A,RAB10,VAMP3,EXOC7,UNC13B,EXOC3,RAB8A,STX12,STX7,STX11,STX10,VPS18,EXOC6B,EXOC5,EXOC4,EXOC1,STX2,VTI1B,RAB13,STXBP1	1.86945	0.579729	26	39
HIPPO SIGNALING REGULATION PATHWAYS%WIKIPATHWAYS_20220510%WP4540%HOMO SAPIENS	HIPPO SIGNALING REGULATION PATHWAYS%WIKIPATHWAYS_20220510%WP4540%HOMO SAPIENS	0.00056872	0.00617714	1	IGF1R,PLCB4,PRKAG1,CDH11,PRKAA2,MTOR,GNA11,INSR,SMAD2,PRKAB2,GNAS,GNAQ,PRKAB1,PRKAA1,EGFR,FLT1	1.89558	0.609084	16	33
BONE DEVELOPMENT%GOBP%GO:0060348	BONE DEVELOPMENT%GOBP%GO:0060348	0.00056872	0.00617714	1	TGM2,FLNA,OGN,RAB23,PLS3,TMEM119,AKAP13,LRRC17,GJA1,ANXA2,GNAS,VKORC1,ANXA6,RHOA	1.89607	0.609241	14	33
E-CADHERIN SIGNALING IN THE NASCENT ADHERENS JUNCTION%PATHWAY INTERACTION DATABASE NCI-NATURE CURATED DATA%E-CADHERIN SIGNALING IN THE NASCENT ADHERENS JUNCTION	E-CADHERIN SIGNALING IN THE NASCENT ADHERENS JUNCTION%PATHWAY INTERACTION DATABASE NCI-NATURE CURATED DATA%E-CADHERIN SIGNALING IN THE NASCENT ADHERENS JUNCTION	0.000571755	0.00617714	1	TJP1,CTTN,ABI1,RAP1B,ENAH,PIP5K1C,RHOA,RAPGEF1,VAV2,DLG1,NCKAP1,ARF6,IQGAP1	1.9024	0.623357	13	30
REGULATION OF OSSIFICATION%GOBP%GO:0030278	REGULATION OF OSSIFICATION%GOBP%GO:0030278	0.000573285	0.00617714	1	TGFB2,TGFB1,TRPM4,TMEM119,PTN,ENPP1,ECM1,S1PR1,TGFB3,FBN2,ATP2B1,ANO6,PTPN11	1.87067	0.633367	13	26
PLATELET AGGREGATION%GOBP%GO:0070527	PLATELET AGGREGATION%GOBP%GO:0070527	0.000574273	0.00617714	1	HBB,ACTN1,RAP2B,ITGB3,FLNA,TLN1,CSRP1,GNAS,VCL,ACTB,ILK,ACTG1,MYH9,FGG,MYL12A,FGB,FGA,MYL9,STXBP1,FERMT3	1.82212	0.602712	20	29
MET PROMOTES CELL MOTILITY%REACTOME DATABASE ID RELEASE 81%8875878	MET PROMOTES CELL MOTILITY%REACTOME DATABASE ID RELEASE 81%8875878	0.000576147	0.00617714	1	LAMB2,LAMA5,DOCK7,LAMA2,RAP1B,LAMA3,ITGB1,LAMA4,RAPGEF1,PTK2,LAMC1,LAMC3	1.92964	0.694516	12	20
PID_NECTIN_PATHWAY%MSIGDB_C2%PID_NECTIN_PATHWAY	PID_NECTIN_PATHWAY%MSIGDB_C2%PID_NECTIN_PATHWAY	0.000577034	0.00617714	1	ITGB3,FARP2,ITGAV,TLN1,PIP5K1C,RAPGEF1,VAV2,PTPRM	1.91246	0.718703	8	17
O-LINKED GLYCOSYLATION%REACTOME%R-HSA-5173105.4	O-LINKED GLYCOSYLATION%REACTOME%R-HSA-5173105.4	0.000579934	0.00617714	1	ADAMTSL3,DAG1,CFP,THSD4,THBS2,SEMA5B,ADAMTS4,GALNT2,POMGNT2,ADAMTSL5	1.88484	0.665047	10	22
REGULATION OF NEUROTRANSMITTER TRANSPORT%GOBP%GO:0051588	REGULATION OF NEUROTRANSMITTER TRANSPORT%GOBP%GO:0051588	0.000579934	0.00617714	1	CASK,ITGB3,SNCA,RAP1B,CAMK2A,TOR1A,ITGB1,FMR1,CPLX1,FLOT1	1.86129	0.656737	10	22
REGULATION OF MECP2 EXPRESSION AND ACTIVITY%REACTOME DATABASE ID RELEASE 81%9022692	REGULATION OF MECP2 EXPRESSION AND ACTIVITY%REACTOME DATABASE ID RELEASE 81%9022692	0.000580495	0.00617714	1	AGO2,NCOR2,CAMK2G,CAMK2B,CAMK2A,AGO1,TBL1XR1,MOV10,HDAC2,CAMK2D,HDAC3,HTT	1.91785	0.700397	12	19
REGULATION OF INTERLEUKIN-1 BETA PRODUCTION%GOBP%GO:0032651	REGULATION OF INTERLEUKIN-1 BETA PRODUCTION%GOBP%GO:0032651	0.000621118	0.00659202	-1	ORM1,STAT3,ORM2,GSTP1,CPTP	-1.89217	-0.688645	5	18
GLUCONEOGENESIS%REACTOME DATABASE ID RELEASE 81%70263	GLUCONEOGENESIS%REACTOME DATABASE ID RELEASE 81%70263	0.000626305	0.00662405	-1	ENO3,PCK2,GPI,ALDOC,ALDOA,MDH1,ENO1,GOT1,PGAM2,TPI1,MDH2	-1.94563	-0.666601	11	23
SYNTHESIS OF PA%REACTOME%R-HSA-1483166.6	SYNTHESIS OF PA%REACTOME%R-HSA-1483166.6	0.000628799	0.00662405	-1	PLA2G12A,GPD1L,LCLAT1,GPD1,LPCAT4,GPD2,ACP6,GNPAT,PLD6,LPCAT1	-1.89704	-0.72713	10	15
REGULATION OF INTERLEUKIN-1 PRODUCTION%GOBP%GO:0032652	REGULATION OF INTERLEUKIN-1 PRODUCTION%GOBP%GO:0032652	0.000629063	0.00662405	-1	ORM1,STAT3,ORM2,SAA1,GSTP1,CPTP	-1.90606	-0.634174	6	26
MITOCHONDRIAL COMPLEX I ASSEMBLY MODEL OXPHOS SYSTEM%WIKIPATHWAYS_20220510%WP4324%HOMO SAPIENS	MITOCHONDRIAL COMPLEX I ASSEMBLY MODEL OXPHOS SYSTEM%WIKIPATHWAYS_20220510%WP4324%HOMO SAPIENS	0.000641437	0.00673676	-1	NDUFA12,NDUFA10,NDUFB7,NDUFA6,NDUFAB1,NDUFV2,NDUFB3,NDUFA5,TMEM126B,ECSIT,NDUFB9,NDUFS3,NUBPL,NDUFS6,NDUFS1,NDUFS4,NDUFB6,NDUFC2,NDUFV1,NDUFB8,NDUFAF1,NDUFB4,NDUFA2,NDUFS5,TMEM70,NDUFAF6	-1.82168	-0.542882	26	41
PROTON MOTIVE FORCE-DRIVEN ATP SYNTHESIS%GOBP%GO:0015986	PROTON MOTIVE FORCE-DRIVEN ATP SYNTHESIS%GOBP%GO:0015986	0.000650759	0.00678905	-1	NDUFS7,NDUFA12,NDUFA10,NDUFB7,NDUFA6,NDUFAB1,NDUFV2,NDUFB3,NDUFA5,NDUFB9,NDUFS3,NDUFA11,MT-ND1,NDUFA9,MT-ATP6,NDUFS6,NDUFS1,NDUFS8,NDUFS4,NDUFB6,NDUFC2,NDUFS2,NDUFV1,NDUFB8,NDUFB4,NDUFA2,NDUFS5	-1.73131	-0.499689	27	48
PROTON MOTIVE FORCE-DRIVEN MITOCHONDRIAL ATP SYNTHESIS%GOBP%GO:0042776	PROTON MOTIVE FORCE-DRIVEN MITOCHONDRIAL ATP SYNTHESIS%GOBP%GO:0042776	0.000650759	0.00678905	-1	NDUFS7,NDUFA12,NDUFA10,NDUFB7,NDUFA6,NDUFAB1,NDUFV2,NDUFB3,NDUFA5,NDUFB9,NDUFS3,NDUFA11,MT-ND1,NDUFA9,MT-ATP6,NDUFS6,NDUFS1,NDUFS8,NDUFS4,NDUFB6,NDUFC2,NDUFS2,NDUFV1,NDUFB8,NDUFB4,NDUFA2,NDUFS5	-1.73131	-0.499689	27	48
CARBOHYDRATE CATABOLIC PROCESS%GOBP%GO:0016052	CARBOHYDRATE CATABOLIC PROCESS%GOBP%GO:0016052	0.000651466	0.00678905	-1	ENO3,HK3,GPI,ALDOC,FOXK2,PGD,MANBA,ALDOA,PFKM,PFKFB1,ENOSF1,ENO1,LDHA,PGAM2,GALK1,GALT,PYGM,TPI1,MAN2C1	-1.77375	-0.516388	19	46
RESPONSE TO ENDOGENOUS STIMULUS%GOBP%GO:0009719	RESPONSE TO ENDOGENOUS STIMULUS%GOBP%GO:0009719	0.000654129	0.00679923	1	IGF1R,TGM2,IGFBP5,TGFB2,GNAO1,FYN,GNA14,TGFB1,CACNA2D1,PKD2,CILP,RAB31,LTBP2,RAB35,CAV1,FMOD,FLNA,ATP2B4,IGF2,CLEC3B,SLC9A1,GNAI1,KIDINS220,ITGB5,COL3A1,TIMP2,RARRES2,SNCA,CAV2,MXRA5,MTOR,ANKRD1,CD9,RPTOR,ENPP1,RAP1B,VIM,GNA11,INSR,COL1A2,PHOX2B,SMAD2,NCOA2,GJA1,DMTN,ROCK1,CD44,CAMK2A,SORT1,STAT5B,PXN,GNAS,ITGB1,SLC2A1,TGFB3,TGFBRAP1,RAB10,SLC2A4,EIF2B5,LIMS1,PTPN11,CORO1B,PSEN1,AKAP9,APP,PTPN2,U…	1.48965	0.337004	87	326
PROTEIN MODIFICATION BY SMALL PROTEIN REMOVAL%GOBP%GO:0070646	PROTEIN MODIFICATION BY SMALL PROTEIN REMOVAL%GOBP%GO:0070646	0.000662105	0.00683688	-1	HINT1,COPS2,OTUD4,COPS8,PSMD14,USP8,COPS5,COPS4,OTULIN,WDR48,USP14,USP10,COPS6,SENP8,OTUB1,USP2,EIF3F,USP47,COPS3,USP7,UCHL5,GPS1,UCHL3,USP16,ENY2,USP19	-1.75055	-0.482524	26	60
LOCALIZATION WITHIN MEMBRANE%GOBP%GO:0051668	LOCALIZATION WITHIN MEMBRANE%GOBP%GO:0051668	0.000662361	0.00683688	1	ANK1,ANO1,RFTN1,AGRN,SLC9A3R1,RAB31,RAB35,CAV1,EFR3A,TRAM1,SRPRB,KIF13A,FLNA,RAB34,OXA1L,DLG3,SPTBN1,LMNB1,SLMAP,SEC62,EXOC2,RAB8B,FLOT2,RILPL1,EMC1,THY1,VTI1A,PTN,GOLGA4,TTC7B,MYADM,STX3,STX16,TIMM22,MYO1C,AP4M1,ROCK1,GOLGA7,EHD3,LLGL1,PTPN23,FLOT1,EMC4,ARFGEF2,RAB10,HGS,SCRIB,NSF,ATP1B3,APOE,FCHO2,HSPA4,RABEP1,PACS1,EMC3,VPS52,FERMT2,BAG6,RAB14,RAB8A,STX12,DLG1,RAB6A,SEC63,LMTK2,LMNA,EGFR,PEX16…	1.54148	0.35586	79	260
ER-PHAGOSOME PATHWAY%REACTOME DATABASE ID RELEASE 81%1236974	ER-PHAGOSOME PATHWAY%REACTOME DATABASE ID RELEASE 81%1236974	0.000662837	0.00683688	-1	PSME2,PSMA4,PSME1,CD14,PSMD14,PSMB6,PSMA1,PSMB3,PSMA7,PSMB4,VAMP8,PSMC2,PSMB7,PSMA6,PSMB2,PSMA2,PSMD7,PSMB8,PSMA3,PSMD5,PSMC1,TAP1	-1.68884	-0.445846	22	75
ALPHA-AMINO ACID METABOLIC PROCESS%GOBP%GO:1901605	ALPHA-AMINO ACID METABOLIC PROCESS%GOBP%GO:1901605	0.000664599	0.00683757	-1	SEPHS1,GLUD2,MTHFR,ALDH6A1,GCLM,SHMT1,THAP4,AASDHPPT,ACAT1,GLUL,ASL,MCCC2,MPST,TST,BCAT2,GOT1,ADI1,GCSH,FPGS,HIBADH,QDPR,ASS1,ALDH5A1,AASS,MRI1,MTHFS,ASPA,SMS	-1.6765	-0.441612	28	76
ATP METABOLIC PROCESS%GOBP%GO:0046034	ATP METABOLIC PROCESS%GOBP%GO:0046034	0.000676743	0.00694479	-1	ENO3,HK3,NDUFS7,GPI,ALDOC,NDUFA12,FOXK2,OLA1,ALDOA,MYH6,PFKM,PFKFB1,NDUFA10,NDUFB7,ENO1,NDUFA6,HSPA1B,LDHA,PGAM2,NDUFAB1,NDUFV2,NDUFB3,NDUFA5,TPI1,NDUFB9,NDUFS3,NDUFA11,MT-ND1,NDUFA9,MT-ATP6,PKM,NDUFS6,NDUFS1,NDUFS8,NDUFS4,NDUFB6,NDUFC2,NDUFS2,GAPDH,PARG,NDUFV1,NDUFB8,MYH3	-1.64599	-0.418607	43	95
GOLGI VESICLE TRANSPORT%GOBP%GO:0048193	GOLGI VESICLE TRANSPORT%GOBP%GO:0048193	0.000681083	0.00697159	1	ANK1,BET1,RAB31,YIPF4,CYTH3,KIF13A,SPIRE1,SNX8,RBSN,RAB34,ATL3,SPTBN1,EXOC2,ATP9A,RAB8B,TRAPPC3,VTI1A,YIPF5,GOLGA4,SEC31A,SNAP23,COG5,PEF1,AP4M1,USE1,GOLGA7,EHD3,PDCD6,SORT1,LLGL1,ERGIC1,BCAP31,SEC24B,RAB33B,ARFGEF2,MYO18A,CUL3,NRBP2,RAB10,SEC22B,NSF,TRIP11,BCAP29,RABEP1,COG7,VPS52,LMAN2,COPZ2,RAB14,RAB8A,RP2,VAMP7,RAB6A,GABARAPL2,VAPA,CCDC93,DNM2,SURF4,STX10,PREB,SEC23A,STX18,TRAPPC9,EXOC6B,SCAM…	1.59712	0.379368	78	199
HOST INTERACTIONS OF HIV FACTORS%REACTOME DATABASE ID RELEASE 81%162909	HOST INTERACTIONS OF HIV FACTORS%REACTOME DATABASE ID RELEASE 81%162909	0.000685088	0.00699483	-1	PSME2,PSMA4,NUP43,PSME1,PSMD14,PSMB6,CCNT1,PSMA1,PSMB3,PSMA7,PSMB4,PSMC2,PSMB7,PSMA6,PSMB2,PSMA2,PSMD7,PSMB8,PSMA3,PAK2,PSMD5,NUP155,PSMC1,ATP6V1H,AP1B1,RBX1,NUP50,DOCK2,B2M,PSMC5,PSMD1,AP2S1,SLC25A4,PSMB10,AP2A1,NUP160,PSMF1,RANGAP1,NUP37,NUP35,PSMC3,PSMD12,PSME4,NUP153,NUP85,PSMD11,NPM1	-1.67231	-0.419164	47	105
REGULATION OF ION TRANSPORT%GOBP%GO:0043269	REGULATION OF ION TRANSPORT%GOBP%GO:0043269	0.00069541	0.0070823	1	DMD,FYN,CACNA2D1,UTRN,PKD2,FXYD1,SLC9A3R1,ITGB3,CAV1,CAMK2G,FLNA,ATP2B4,TRDN,JPH2,SLC9A1,PPP3CC,SNCA,SLMAP,HOMER1,PDGFRB,CAMK2B,THY1,PLN,HOMER2,STX1A,RELN,ACTN4,CAMK2A,TOR1A,MYLK,ITGB1,ISCU,FMR1,ATP2B1,VAMP3,ANO6,HOMER3,PACSIN3,ATP1B3,AKAP9,APP,AHNAK,ORAI1,ACTB,VDAC1,DLG1,STIM1,VAMP7,ACE2,NPPA,FHL1,YWHAH,CAMK2D,PLCG1,HRC,BIN1,CXCL12	1.60465	0.391319	57	162
SULFUR COMPOUND METABOLIC PROCESS%GOBP%GO:0006790	SULFUR COMPOUND METABOLIC PROCESS%GOBP%GO:0006790	0.000698975	0.00710067	-1	PMVK,BOLA1,BTD,ACACB,MTHFR,MVD,CIAPIN1,GCLM,GSTP1,GSR,ETHE1,ACAT1,MVK,ACSF2,GLRX5,HMGCS2,GSTM2,ACSS2,PARK7,HSD17B4,GLRX3,CHPF,MPST,HLCS,TST,ACOT2,GSTM4,CHST7,PAPSS2,GCDH,PPT1,NDUFAB1,ADI1,GSTT2B,ACOT8,ST3GAL1,ELOVL1,SUCLG2,HSCB,MRI1,SUOX,BOLA3,FAR1,SMS,SUCLA2,NUBPL,OPLAH,LIAS,B4GAT1,MMACHC,MTAP,BPNT1,SUCLG1,MMS19,GLRX2	-1.56525	-0.374288	55	147
NEURONAL SYSTEM%REACTOME%R-HSA-112316.7	NEURONAL SYSTEM%REACTOME%R-HSA-112316.7	0.000706964	0.00713805	1	CASK,CACNA2D1,DBNL,CAMK2G,PRKAG1,EPB41L1,GNAI1,DLG3,PRKAA2,FLOT2,DLGAP4,HOMER1,GNAI2,CAMK2B,PPFIA4,ADCY9,HOMER2,STX1A,PRKAB2,NPTN,CAMK2A,CPLX1,FLOT1,COMT,CACNA2D2,RTN3,KCNA4,NSF,HOMER3,EPB41L2,PPFIA1,UNC13B,SLC32A1,DLG1,PRKAB1,PRKAA1,DNAJC5,NAAA	1.63699	0.418338	38	114
REGULATION OF BODY FLUID LEVELS%GOBP%GO:0050878	REGULATION OF BODY FLUID LEVELS%GOBP%GO:0050878	0.000707965	0.00713805	1	HBB,ENTPD1,ACTN1,ANO1,RAP2B,ITGB3,EMILIN1,CAV1,FLNA,NPR3,PF4,KLKB1,COL3A1,F11,FAP,F13B,CD9,SERPINE2,TLN1,DMTN,HRG,CSRP1,GNAS,STMN1,VKORC1,GNAQ,VAMP3,ANO6,VCL,APOE,ACTB,VAV2,PLAT,ILK,ACTG1,MYH9,NOS3	1.64844	0.424524	37	108
TUBE DEVELOPMENT%GOBP%GO:0035295	TUBE DEVELOPMENT%GOBP%GO:0035295	0.000707965	0.00713805	1	MCAM,COL22A1,EGFL7,TGFB2,EPHB4,COL4A1,TGFB1,TGFBI,PKD2,RECK,ITGB3,CAV1,COL18A1,RARRES2,NRP1,PLXDC1,CALD1,JAM3,PDGFRB,ITGAV,LOXL2,THY1,LUZP1,MICAL2,ANXA2,S1PR1,PLXNB2,MYLK,CALCRL,TGFB3,PXDN,SCRIB,NPNT,RHOA,DAB2IP,SRPK2,RCN3,LOXL3,BAG6,COBL,PRKD2,ACTG1,FGF1,MYH9,CHRD,PTK2,FLT1,CUL7	1.6439	0.414099	48	127
EXPORT FROM CELL%GOBP%GO:0140352	EXPORT FROM CELL%GOBP%GO:0140352	0.000710732	0.00714809	1	ANK1,SYNGR1,STX4,RAB31,LTBP2,CADPS,CAMK2G,CANX,SLC9A1,SNCA,EXOC2,RAB8B,STX3,SNAP23,SLC4A4,STX1A,GJA1,DMTN,RAB11FIP5,USE1,S100A13,CPLX1,ATP2B1,RAB10,VAMP3,RALBP1,NSF,PIP5K1C,ATP1B3,RCN3,EXOC7,UNC13B,EXOC3,RAB8A,SLC32A1,ATP1A3,VAMP7,DNAJC5,STX11,MYH9,PREB,SEL1L,VPS18,EXOC6B,FGG,EXOC5,EXOC4,EXOC1,RAB1A,SDF4,ATP1A2	1.65832	0.421563	51	120
MUSCLE CONTRACTION%REACTOME DATABASE ID RELEASE 81%397014	MUSCLE CONTRACTION%REACTOME DATABASE ID RELEASE 81%397014	0.000713394	0.00715701	1	ATP2A3,DMD,PDE5A,FXYD1,ITGA1,CAMK2G,ITPR1,ATP2B4,TRDN,ITGB5,DYSF,MYL6B,MYH11,CALD1,CAMK2B,PLN,VIM,TLN1,ANXA2,SCN7A,CAMK2A,PXN,MYLK,ATP2B1,CACNA2D2,ANXA6,ATP1B3,AKAP9,VCL,MME,ASPH,ORAI1,SORBS3,SORBS1,ATP1A3,MYL6,STIM1,ITPR3,NPPA,TTN,ACTA2,CAMK2D,TPM3,MYL12A,ITPR2,TPM4,NPR2,LMOD1,DES,ATP1A2	1.651	0.429526	50	101
POSITIVE REGULATION OF ION TRANSPORT%GOBP%GO:0043270	POSITIVE REGULATION OF ION TRANSPORT%GOBP%GO:0043270	0.000727141	0.00727682	1	DMD,CACNA2D1,PKD2,FXYD1,CAV1,FLNA,TRDN,JPH2,SLC9A1,PPP3CC,SNCA,PDGFRB,THY1,STX1A,RELN,ACTN4,CAMK2A,MYLK,ITGB1,ATP2B1,ANO6,ATP1B3,AKAP9,ORAI1,ACTB,DLG1,STIM1,VAMP7,ACE2,NPPA,FHL1	1.687	0.458336	31	77
POSITIVE REGULATION OF CATION TRANSMEMBRANE TRANSPORT%GOBP%GO:1904064	POSITIVE REGULATION OF CATION TRANSMEMBRANE TRANSPORT%GOBP%GO:1904064	0.00074184	0.00740098	1	DMD,CACNA2D1,PKD2,FXYD1,CAV1,FLNA,TRDN,JPH2,SLC9A1,PPP3CC,SNCA,THY1,RELN,ACTN4,ANO6,ATP1B3,AKAP9,STIM1,ACE2,NPPA	1.8908	0.561115	20	48
REGULATION OF CELL MORPHOGENESIS INVOLVED IN DIFFERENTIATION%GOBP%GO:0010769	REGULATION OF CELL MORPHOGENESIS INVOLVED IN DIFFERENTIATION%GOBP%GO:0010769	0.000743218	0.00740098	1	DBNL,FLNA,NRP1,DBN1,CAMK2B,SS18L1,MYADM,CORO1C,RELN,ACTN4,DMTN,LIMS1,TRIOBP,FERMT2,GBP1,PRKDC,ILK,DOCK5,PTK2,DOCK1,MYOC,CUL7,FGG,FGB	1.84571	0.551284	24	47
VESICLE CYTOSKELETAL TRAFFICKING%GOBP%GO:0099518	VESICLE CYTOSKELETAL TRAFFICKING%GOBP%GO:0099518	0.000755715	0.00750689	1	FBXW11,MYO1D,KIF13A,NDE1,ACTN4,MYO1C,KIFAP3,DYNC1H1,KIF3B,AP3B1,BLOC1S5,WASL,MYO6,AP3D1,HTT,RAB1A,MYO1B,BLOC1S2,KIF3A,KIF5B,AP3S1,TRAK1,BLOC1S1,MYO1E,FYCO1	1.83036	0.58141	25	35
GASTRULATION%GOBP%GO:0007369	GASTRULATION%GOBP%GO:0007369	0.000760167	0.00753257	1	ITGB4,COL12A1,COL4A2,ITGB3,COL6A1,ITGB5,COL8A1,ITGAV,SMAD2,LAMA3,ITGB1,ITGA7,CDC73	1.82833	0.608268	13	28
RHO GTPASES ACTIVATE WASPS AND WAVES%REACTOME DATABASE ID RELEASE 81%5663213	RHO GTPASES ACTIVATE WASPS AND WAVES%REACTOME DATABASE ID RELEASE 81%5663213	0.00076234	0.00753559	1	ABI1,WIPF3,CYFIP1,ACTR3,ACTB,ACTR2,NCKIPSD,NCK1,NCKAP1,ACTG1,PTK2,WIPF2,WASL,ARPC5,MAPK1	1.8796	0.615888	15	30
PID_INTEGRIN3_PATHWAY%MSIGDB_C2%PID_INTEGRIN3_PATHWAY	PID_INTEGRIN3_PATHWAY%MSIGDB_C2%PID_INTEGRIN3_PATHWAY	0.00076746	0.00756764	1	COL4A1,TGFBI,COL4A6,ITGB3,CYR61,ITGAV,THY1,COL1A2,COL1A1,LAMA4,COL4A3,LAMC1,FBN1	1.89435	0.659915	13	23
NEUREXINS AND NEUROLIGINS%REACTOME%R-HSA-6794361.4	NEUREXINS AND NEUROLIGINS%REACTOME%R-HSA-6794361.4	0.000769379	0.00756806	1	CASK,DBNL,EPB41L1,DLG3,DLGAP4,HOMER1,HOMER2,STX1A,HOMER3,EPB41L2	1.8966	0.712745	10	17
CELLULAR AMIDE METABOLIC PROCESS%GOBP%GO:0043603	CELLULAR AMIDE METABOLIC PROCESS%GOBP%GO:0043603	0.000803428	0.00784023	-1	PMVK,PM20D2,CPM,BTD,RPS15A,MTHFD2,EIF4E,ACACB,MVD,EIF5,GCLM,RARS2,SHMT1,GSTP1,RPS13,MTHFD2L,AASDHPPT,GSR,RPS18,ETHE1,ACAT1,NPEPPS,MVK,ACSF2,PPP2CA,FARSB,RPS9,HMGCS2,GSTM2,ACSS2,TUFM,COPS5,EIF4A1,CARS2,PARK7,HSD17B4,GBA,RPS16,RPS7,CORIN,HLCS,NCBP2,ACOT2,GSTM4,NIT1,EIF3I,GCDH,RPS4X,CTSZ,GSPT1,PPT1,DHPS,PABPC4,EEF1D,NAGK,DRG1,FPGS,EEF2,RPS17,RPLP2,GSTT2B,ELANE,ACOT8,ST3GAL1,EIF3F,EIF4A2,EIF3M,ASAH1,…	-1.38567	-0.294534	108	444
REGULATION OF CELL DIFFERENTIATION%GOBP%GO:0045595	REGULATION OF CELL DIFFERENTIATION%GOBP%GO:0045595	0.000806712	0.00784023	1	TGM2,TNXB,DAG1,RTN4,TGFB2,LAMB2,CD46,TCF4,SEMA3D,RIN2,TGFB1,PLXNA1,RRAS,IGFBP3,NOTCH2,DBNL,CRIM1,ITGB3,GLIPR2,CAV1,TRPM4,FLNA,EPHA3,PF4,SEMA5B,IGF2,RARRES2,DOCK7,FLOT2,TMEM119,NRP1,MTOR,PHLDB2,DBN1,PHLDB1,CAMK2B,COL5A1,ITGAV,LOXL2,MARK1,SS18L1,THY1,LAMA2,BAD,PTN,GOLGA4,MAP2,LTBP3,ENPP1,SERPINE2,SEMA3C,MYADM,CD74,CORO1C,PIEZO1,SMAD2,LRRC17,RELN,ACTN4,GJA1,DMTN,HLA-DRB1,COL1A1,ROCK1,NPTN,STAT5B,PLX…	1.44464	0.321096	124	401
POSITIVE REGULATION OF MULTICELLULAR ORGANISMAL PROCESS%GOBP%GO:0051240	POSITIVE REGULATION OF MULTICELLULAR ORGANISMAL PROCESS%GOBP%GO:0051240	0.000808146	0.00784023	1	IGF1R,CD55,TGM2,C1QTNF3,RTN4,TGFB2,TNFSF12,TJP1,TRPV2,CTTN,CD46,TGFB1,PLXNA1,RFTN1,AGO2,RRAS,AGRN,DBNL,GLIPR2,IL17D,EMILIN1,CAV1,TRPM4,SRPX2,IL33,PF4,PIBF1,SLC9A1,SPTBN1,ADAM17,GATM,MFAP2,TMEM119,NRP1,MTOR,DBN1,CAMK2B,LOXL2,SS18L1,BAD,PTN,GOLGA4,SERPINE2,PTGIS,CD74,ECM1,PHOX2B,SMAD2,RELN,PRKAB2,NCOA2,GJA1,DMTN,ANXA2,HLA-DRB1,COL1A1,ROCK1,NPTN,PDCD6,MBP,S100A13,HRG,PLXNB2,POLR3F,GNAS,ITGB1,FLOT1,A…	1.44406	0.322459	117	382
CELLULAR RESPONSE TO ENDOGENOUS STIMULUS%GOBP%GO:0071495	CELLULAR RESPONSE TO ENDOGENOUS STIMULUS%GOBP%GO:0071495	0.000823995	0.00784023	1	IGF1R,TGM2,IGFBP5,TGFB2,GNAO1,FYN,GNA14,TGFB1,CACNA2D1,PKD2,CILP,RAB31,LTBP2,RAB35,CAV1,FMOD,FLNA,ATP2B4,IGF2,CLEC3B,SLC9A1,KIDINS220,ITGB5,COL3A1,RARRES2,SNCA,CAV2,MTOR,ANKRD1,RPTOR,ENPP1,RAP1B,VIM,GNA11,INSR,COL1A2,PHOX2B,SMAD2,NCOA2,GJA1,DMTN,CD44,CAMK2A,STAT5B,PXN,GNAS,ITGB1,TGFB3,TGFBRAP1,RAB10,SLC2A4,LIMS1,PTPN11,CORO1B,PSEN1,AKAP9,APP,PTPN2,UBE3A,DAB2IP,ACTB,RAPGEF1,SORBS1,FERMT2,RAB14,RAB…	1.49121	0.341968	81	280
CELL REDOX HOMEOSTASIS%GOBP%GO:0045454	CELL REDOX HOMEOSTASIS%GOBP%GO:0045454	0.000835073	0.00784023	-1	BOLA1,TXNRD1,PRDX6,GSR,GLRX5,PRDX1,TXNRD2,GLRX3,TXN,PRDX5,TXN2,NQO1,BOLA3,PRDX3,GIT1	-1.8994	-0.650761	15	23
ATP GENERATION FROM ADP%GOBP%GO:0006757	ATP GENERATION FROM ADP%GOBP%GO:0006757	0.000835771	0.00784023	-1	ENO3,HK3,GPI,ALDOC,FOXK2,ALDOA,PFKM,PFKFB1,ENO1,LDHA,PGAM2,TPI1	-1.91495	-0.642825	12	25
GLYCOLYTIC PROCESS%GOBP%GO:0006096	GLYCOLYTIC PROCESS%GOBP%GO:0006096	0.000835771	0.00784023	-1	ENO3,HK3,GPI,ALDOC,FOXK2,ALDOA,PFKM,PFKFB1,ENO1,LDHA,PGAM2,TPI1	-1.91495	-0.642825	12	25
VALINE, LEUCINE, AND ISOLEUCINE DEGRADATION%PATHWHIZ%PW000051	VALINE, LEUCINE, AND ISOLEUCINE DEGRADATION%PATHWHIZ%PW000051	0.000843704	0.00784023	-1	ALDH6A1,ACAT1,ALDH2,HMGCS2,BCKDHB,AOX1,MCCC2,ECHS1,ACAA2,HIBADH,PCCB,BCKDHA,AUH,ACAD8	-1.91121	-0.629786	14	27
BETA-KETOTHIOLASE DEFICIENCY%SMPDB%SMP0000173	BETA-KETOTHIOLASE DEFICIENCY%SMPDB%SMP0000173	0.000843704	0.00784023	-1	ALDH6A1,ACAT1,ALDH2,HMGCS2,BCKDHB,AOX1,MCCC2,ECHS1,ACAA2,HIBADH,PCCB,BCKDHA,AUH,ACAD8	-1.91121	-0.629786	14	27
2-METHYL-3-HYDROXYBUTYRYL-COA DEHYDROGENASE DEFICIENCY%PATHWHIZ%PW000061	2-METHYL-3-HYDROXYBUTYRYL-COA DEHYDROGENASE DEFICIENCY%PATHWHIZ%PW000061	0.000843704	0.00784023	-1	ALDH6A1,ACAT1,ALDH2,HMGCS2,BCKDHB,AOX1,MCCC2,ECHS1,ACAA2,HIBADH,PCCB,BCKDHA,AUH,ACAD8	-1.91121	-0.629786	14	27
PROPIONIC ACIDEMIA%PATHWHIZ%PW000062	PROPIONIC ACIDEMIA%PATHWHIZ%PW000062	0.000843704	0.00784023	-1	ALDH6A1,ACAT1,ALDH2,HMGCS2,BCKDHB,AOX1,MCCC2,ECHS1,ACAA2,HIBADH,PCCB,BCKDHA,AUH,ACAD8	-1.91121	-0.629786	14	27
3-HYDROXY-3-METHYLGLUTARYL-COA LYASE DEFICIENCY%PATHWHIZ%PW000063	3-HYDROXY-3-METHYLGLUTARYL-COA LYASE DEFICIENCY%PATHWHIZ%PW000063	0.000843704	0.00784023	-1	ALDH6A1,ACAT1,ALDH2,HMGCS2,BCKDHB,AOX1,MCCC2,ECHS1,ACAA2,HIBADH,PCCB,BCKDHA,AUH,ACAD8	-1.91121	-0.629786	14	27
MAPLE SYRUP URINE DISEASE%PATHWHIZ%PW000064	MAPLE SYRUP URINE DISEASE%PATHWHIZ%PW000064	0.000843704	0.00784023	-1	ALDH6A1,ACAT1,ALDH2,HMGCS2,BCKDHB,AOX1,MCCC2,ECHS1,ACAA2,HIBADH,PCCB,BCKDHA,AUH,ACAD8	-1.91121	-0.629786	14	27
3-METHYLCROTONYL-COA CARBOXYLASE DEFICIENCY TYPE I%SMPDB%SMP0000237	3-METHYLCROTONYL-COA CARBOXYLASE DEFICIENCY TYPE I%SMPDB%SMP0000237	0.000843704	0.00784023	-1	ALDH6A1,ACAT1,ALDH2,HMGCS2,BCKDHB,AOX1,MCCC2,ECHS1,ACAA2,HIBADH,PCCB,BCKDHA,AUH,ACAD8	-1.91121	-0.629786	14	27
3-METHYLGLUTACONIC ACIDURIA TYPE I%SMPDB%SMP0000139	3-METHYLGLUTACONIC ACIDURIA TYPE I%SMPDB%SMP0000139	0.000843704	0.00784023	-1	ALDH6A1,ACAT1,ALDH2,HMGCS2,BCKDHB,AOX1,MCCC2,ECHS1,ACAA2,HIBADH,PCCB,BCKDHA,AUH,ACAD8	-1.91121	-0.629786	14	27
3-METHYLGLUTACONIC ACIDURIA TYPE III%SMPDB%SMP0000140	3-METHYLGLUTACONIC ACIDURIA TYPE III%SMPDB%SMP0000140	0.000843704	0.00784023	-1	ALDH6A1,ACAT1,ALDH2,HMGCS2,BCKDHB,AOX1,MCCC2,ECHS1,ACAA2,HIBADH,PCCB,BCKDHA,AUH,ACAD8	-1.91121	-0.629786	14	27
METHYLMALONATE SEMIALDEHYDE DEHYDROGENASE DEFICIENCY%SMPDB%SMP0000384	METHYLMALONATE SEMIALDEHYDE DEHYDROGENASE DEFICIENCY%SMPDB%SMP0000384	0.000843704	0.00784023	-1	ALDH6A1,ACAT1,ALDH2,HMGCS2,BCKDHB,AOX1,MCCC2,ECHS1,ACAA2,HIBADH,PCCB,BCKDHA,AUH,ACAD8	-1.91121	-0.629786	14	27
METHYLMALONIC ACIDURIA%SMPDB%SMP0000200	METHYLMALONIC ACIDURIA%SMPDB%SMP0000200	0.000843704	0.00784023	-1	ALDH6A1,ACAT1,ALDH2,HMGCS2,BCKDHB,AOX1,MCCC2,ECHS1,ACAA2,HIBADH,PCCB,BCKDHA,AUH,ACAD8	-1.91121	-0.629786	14	27
ISOVALERIC ACIDURIA%PATHWHIZ%PW000091	ISOVALERIC ACIDURIA%PATHWHIZ%PW000091	0.000843704	0.00784023	-1	ALDH6A1,ACAT1,ALDH2,HMGCS2,BCKDHB,AOX1,MCCC2,ECHS1,ACAA2,HIBADH,PCCB,BCKDHA,AUH,ACAD8	-1.91121	-0.629786	14	27
3-METHYLGLUTACONIC ACIDURIA TYPE IV%SMPDB%SMP0000141	3-METHYLGLUTACONIC ACIDURIA TYPE IV%SMPDB%SMP0000141	0.000843704	0.00784023	-1	ALDH6A1,ACAT1,ALDH2,HMGCS2,BCKDHB,AOX1,MCCC2,ECHS1,ACAA2,HIBADH,PCCB,BCKDHA,AUH,ACAD8	-1.91121	-0.629786	14	27
3-HYDROXYISOBUTYRIC ACID DEHYDROGENASE DEFICIENCY%SMPDB%SMP0000521	3-HYDROXYISOBUTYRIC ACID DEHYDROGENASE DEFICIENCY%SMPDB%SMP0000521	0.000843704	0.00784023	-1	ALDH6A1,ACAT1,ALDH2,HMGCS2,BCKDHB,AOX1,MCCC2,ECHS1,ACAA2,HIBADH,PCCB,BCKDHA,AUH,ACAD8	-1.91121	-0.629786	14	27
3-HYDROXYISOBUTYRIC ACIDURIA%PATHWHIZ%PW000498	3-HYDROXYISOBUTYRIC ACIDURIA%PATHWHIZ%PW000498	0.000843704	0.00784023	-1	ALDH6A1,ACAT1,ALDH2,HMGCS2,BCKDHB,AOX1,MCCC2,ECHS1,ACAA2,HIBADH,PCCB,BCKDHA,AUH,ACAD8	-1.91121	-0.629786	14	27
ISOBUTYRYL-COA DEHYDROGENASE DEFICIENCY%SMPDB%SMP0000523	ISOBUTYRYL-COA DEHYDROGENASE DEFICIENCY%SMPDB%SMP0000523	0.000843704	0.00784023	-1	ALDH6A1,ACAT1,ALDH2,HMGCS2,BCKDHB,AOX1,MCCC2,ECHS1,ACAA2,HIBADH,PCCB,BCKDHA,AUH,ACAD8	-1.91121	-0.629786	14	27
ISOVALERIC ACIDEMIA%PATHWHIZ%PW000500	ISOVALERIC ACIDEMIA%PATHWHIZ%PW000500	0.000843704	0.00784023	-1	ALDH6A1,ACAT1,ALDH2,HMGCS2,BCKDHB,AOX1,MCCC2,ECHS1,ACAA2,HIBADH,PCCB,BCKDHA,AUH,ACAD8	-1.91121	-0.629786	14	27
PCP CE PATHWAY%REACTOME DATABASE ID RELEASE 81%4086400	PCP CE PATHWAY%REACTOME DATABASE ID RELEASE 81%4086400	0.000879701	0.00815594	-1	PSME2,PSMA4,PSME1,PSMD14,PSMB6,PSMA1,PSMB3,PSMA7,PSMB4,PSMC2,PSMB7,PSMA6,PSMB2,PSMA2,PSMD7,PSMB8,PSMA3,PSMD5	-1.68687	-0.459954	18	63
PI3K-AKT SIGNALING PATHWAY%WIKIPATHWAYS_20220510%WP4172%HOMO SAPIENS	PI3K-AKT SIGNALING PATHWAY%WIKIPATHWAYS_20220510%WP4172%HOMO SAPIENS	0.000886839	0.00820326	1	IGF1R,ITGB4,THBS4,LAMB2,COL4A1,COL4A2,LAMA5,COMP,THBS2,ITGA1,COL4A6,ITGB3,COL6A1,IGF2,GYS1,ITGB5,PRKAA2,MTOR,ITGAV,CDK4,BAD,INSR,COL1A2,RELN,COL1A1,LAMA3,ITGB1,THBS3,ITGA7,LAMA4,CCND2,RPS6KB2,COL4A3,ITGA6,PPP2R3B	1.65783	0.423406	35	115
SECRETION BY CELL%GOBP%GO:0032940	SECRETION BY CELL%GOBP%GO:0032940	0.000889205	0.00820632	1	ANK1,SYNGR1,STX4,RAB31,LTBP2,CADPS,CAMK2G,CANX,SNCA,EXOC2,RAB8B,STX3,SNAP23,STX1A,GJA1,DMTN,RAB11FIP5,USE1,S100A13,CPLX1,RAB10,VAMP3,NSF,PIP5K1C,RCN3,EXOC7,UNC13B,EXOC3,RAB8A,SLC32A1,VAMP7,DNAJC5,STX11,MYH9,PREB,SEL1L,VPS18,EXOC6B,FGG,EXOC5,EXOC4,EXOC1,RAB1A,SDF4	1.62755	0.421061	44	105
C-TYPE LECTIN RECEPTORS (CLRS)%REACTOME%R-HSA-5621481.1	C-TYPE LECTIN RECEPTORS (CLRS)%REACTOME%R-HSA-5621481.1	0.000894855	0.00823961	-1	PSME2,PSMA4,PSME1,UBE2V1,UBE2N,PSMD14,PSMB6,PSMA1,PSMB3,PSMA7,PSMB4,PSMC2,PSMB7,PRKCD,PSMA6,PSMB2,PSMA2,PSMD7,UBE2M,BCL10,PSMB8,PSMA3,PAK2,PSMD5,PSMC1,NRAS,UBA3,ICAM2,TAB1,PRKACG,RPS6KA5,NFKBIA,EP300,PSMC5	-1.67499	-0.433127	34	85
FC EPSILON RECEPTOR (FCERI) SIGNALING%REACTOME%R-HSA-2454202.3	FC EPSILON RECEPTOR (FCERI) SIGNALING%REACTOME%R-HSA-2454202.3	0.000901104	0.00827825	-1	PSME2,PSMA4,PSME1,UBE2V1,UBE2N,PSMD14,PSMB6,PSMA1,PSMB3,PSMA7,PSMB4,PSMC2,PSMB7,PSMA6,PSMB2,PSMA2,PSMD7,BCL10,PSMB8,PSMA3,MAP2K4,PAK2,PSMD5	-1.64612	-0.420333	23	92
ACTOMYOSIN STRUCTURE ORGANIZATION%GOBP%GO:0031032	ACTOMYOSIN STRUCTURE ORGANIZATION%GOBP%GO:0031032	0.000910913	0.00832763	1	SYNPO2L,MYO18B,TJP1,MYH10,PGM5,EPB41L1,ITGB5,MYH11,PDGFRB,ANKRD1,CDC42BPB,PDLIM1,ROCK1,FRMD5,CSRP1,ITGB1,LMOD2,MYO18A,CUL3,CDC42BPA,EPB41L2,RHOA,SORBS1,MYPN,ARRB1,MYH9,CSRP2,TTN,MYH14,OBSCN,LMOD1,CSRP3,EPB41,ROCK2,TMOD3,MYL9,NRAP,ZYX,FLNC	1.71363	0.471407	39	72
PURINE RIBONUCLEOSIDE TRIPHOSPHATE METABOLIC PROCESS%GOBP%GO:0009205	PURINE RIBONUCLEOSIDE TRIPHOSPHATE METABOLIC PROCESS%GOBP%GO:0009205	0.000913451	0.00832763	-1	ENO3,HK3,NDUFS7,GPI,ALDOC,NDUFA12,IMPDH1,FOXK2,OLA1,ALDOA,MYH6,PFKM,PFKFB1,NDUFA10,NDUFB7,ENO1,MFN1,NDUFA6,HSPA1B,LDHA,PGAM2,NDUFAB1,NDUFV2,NDUFB3,NDUFA5,TPI1,IMPDH2,NDUFB9,NDUFS3,NDUFA11,MT-ND1,NDUFA9,MT-ATP6,PKM,NDUFS6,NDUFS1,NDUFS8,NDUFS4,NDUFB6,NDUFC2,NDUFS2,GAPDH,PARG,NDUFV1,NDUFB8,MYH3	-1.61323	-0.404357	46	105
RIBONUCLEOSIDE TRIPHOSPHATE METABOLIC PROCESS%GOBP%GO:0009199	RIBONUCLEOSIDE TRIPHOSPHATE METABOLIC PROCESS%GOBP%GO:0009199	0.000917011	0.00832763	-1	ENO3,HK3,NDUFS7,GPI,ALDOC,NDUFA12,IMPDH1,FOXK2,OLA1,ALDOA,MYH6,PFKM,PFKFB1,NDUFA10,NDUFB7,ENO1,MFN1,NDUFA6,HSPA1B,LDHA,PGAM2,NDUFAB1,NDUFV2,NDUFB3,NDUFA5,TPI1,IMPDH2,NDUFB9,NDUFS3,NDUFA11,MT-ND1,NDUFA9,MT-ATP6,PKM,NDUFS6,NDUFS1,NDUFS8,NDUFS4,NDUFB6,NDUFC2,NDUFS2,GAPDH,PARG,NDUFV1,NDUFB8,MYH3	-1.60388	-0.399471	46	109
LEISHMANIA PHAGOCYTOSIS%REACTOME%R-HSA-9664417.1	LEISHMANIA PHAGOCYTOSIS%REACTOME%R-HSA-9664417.1	0.000920132	0.00832763	1	FYN,ABI1,WIPF3,CYFIP1,MYO1C,ACTR3,MYO9B,ACTB,ACTR2,VAV2,NCKIPSD,NCK1,NCKAP1,ACTG1,MYH9,PTK2,ELMO2,DOCK1,WIPF2,WASL,ARPC5,MAPK1	1.79849	0.525309	22	52
FCGR3A-MEDIATED PHAGOCYTOSIS%REACTOME%R-HSA-9664422.1	FCGR3A-MEDIATED PHAGOCYTOSIS%REACTOME%R-HSA-9664422.1	0.000920132	0.00832763	1	FYN,ABI1,WIPF3,CYFIP1,MYO1C,ACTR3,MYO9B,ACTB,ACTR2,VAV2,NCKIPSD,NCK1,NCKAP1,ACTG1,MYH9,PTK2,ELMO2,DOCK1,WIPF2,WASL,ARPC5,MAPK1	1.79849	0.525309	22	52
PARASITE INFECTION%REACTOME%R-HSA-9664407.1	PARASITE INFECTION%REACTOME%R-HSA-9664407.1	0.000920132	0.00832763	1	FYN,ABI1,WIPF3,CYFIP1,MYO1C,ACTR3,MYO9B,ACTB,ACTR2,VAV2,NCKIPSD,NCK1,NCKAP1,ACTG1,MYH9,PTK2,ELMO2,DOCK1,WIPF2,WASL,ARPC5,MAPK1	1.79849	0.525309	22	52
CARBOHYDRATE METABOLIC PROCESS%GOBP%GO:0005975	CARBOHYDRATE METABOLIC PROCESS%GOBP%GO:0005975	0.000925069	0.00832763	-1	ENO3,IMPA2,IDH2,PCK2,HK3,GPI,ALDOC,FOXK2,PGD,MANBA,ALDOA,FUCA1,RGN,ALDH2,DCXR,PFKM,PFKFB1,ENOSF1,ENO1,FGGY,ITPK1,GOT1,PGP,CHST7,LDHA,PGAM2,GALK1,GALT,PTEN,PYGM,ADIPOQ,RBP4,TPI1,AKR1B1,ME1,GALK2,IMPA1,MAN2C1,GDPGP1	-1.58072	-0.385142	39	129
SIGNALING EVENTS MEDIATED BY FOCAL ADHESION KINASE%PATHWAY INTERACTION DATABASE NCI-NATURE CURATED DATA%SIGNALING EVENTS MEDIATED BY FOCAL ADHESION KINASE	SIGNALING EVENTS MEDIATED BY FOCAL ADHESION KINASE%PATHWAY INTERACTION DATABASE NCI-NATURE CURATED DATA%SIGNALING EVENTS MEDIATED BY FOCAL ADHESION KINASE	0.000926441	0.00832763	1	ACTN1,FYN,RRAS,ITGB5,ITGAV,RAP1B,ARHGAP35,TLN1,PXN,ITGB1,VCL,RHOA,RAPGEF1,NCK1,NCK2,RAF1,PTK2,DOCK1,PLCG1,ARHGEF11,WASL,MAPK1,GRB2,CAPN2,ROCK2	1.79461	0.537312	25	46
REGULATION OF CELL-SUBSTRATE JUNCTION ORGANIZATION%GOBP%GO:0150116	REGULATION OF CELL-SUBSTRATE JUNCTION ORGANIZATION%GOBP%GO:0150116	0.000926441	0.00832763	1	COL16A1,EPHA3,SLC9A1,PTPRA,NRP1,PHLDB2,THY1,MAPRE2,CORO1C,TLN1,MAP4K4,DMTN,ROCK1,HRG,DAPK3,LIMS1,VCL,RHOA,FERMT2,PEAK1,IQSEC1,ACTG1,PTK2,CLASP1,SLK,MYOC	1.80274	0.539747	26	46
POSITIVE REGULATION OF EPITHELIAL CELL PROLIFERATION%GOBP%GO:0050679	POSITIVE REGULATION OF EPITHELIAL CELL PROLIFERATION%GOBP%GO:0050679	0.000927128	0.00832763	1	RTN4,THBS4,EGFL7,TNFSF12,NOTCH2,ITGB3,IGF2,ADAM17,NRP1,BAD,PTN,ECM1,PDCD6,FZD7,PRKD2,EGFR,FGF1,PLCG1,LAMC1	1.83732	0.552148	19	45
POSITIVE REGULATION OF CELL MORPHOGENESIS INVOLVED IN DIFFERENTIATION%GOBP%GO:0010770	POSITIVE REGULATION OF CELL MORPHOGENESIS INVOLVED IN DIFFERENTIATION%GOBP%GO:0010770	0.000940557	0.00842948	1	DBNL,FLNA,NRP1,DBN1,CAMK2B,SS18L1,MYADM,RELN,DMTN,LIMS1,TRIOBP,FERMT2,PRKDC,ILK,DOCK5,DOCK1,MYOC,CUL7,FGG,FGB	1.84747	0.572913	20	39
SMOOTH MUSCLE CONTRACTION%REACTOME DATABASE ID RELEASE 81%445355	SMOOTH MUSCLE CONTRACTION%REACTOME DATABASE ID RELEASE 81%445355	0.000950029	0.00849549	1	PDE5A,ITGA1,ITGB5,DYSF,MYL6B,MYH11,CALD1,TLN1,ANXA2,PXN,MYLK,ANXA6,VCL,SORBS3,SORBS1,MYL6,ACTA2,TPM3,MYL12A,TPM4,LMOD1	1.81337	0.589196	21	31
MEIOTIC NUCLEAR DIVISION%GOBP%GO:0140013	MEIOTIC NUCLEAR DIVISION%GOBP%GO:0140013	0.000960061	0.00856621	1	HSPA2,TUBB8,CENPC,SPIRE1,BAG6,TOP2B,SMC3,KLHDC3	1.87834	0.716907	8	16
REGULATION OF CELL POPULATION PROLIFERATION%GOBP%GO:0042127	REGULATION OF CELL POPULATION PROLIFERATION%GOBP%GO:0042127	0.000966028	0.00860042	1	IGF1R,CD55,TP53I11,RTN4,IGFBP5,THBS4,EGFL7,TGFB2,S100A6,TNFSF12,IGFBP7,TJP1,STX4,CD46,CASK,IRF6,TGFB1,IGFBP3,PKD2,ABI1,NOTCH2,SLC9A3R1,ITGA1,ITGB3,ELN,CAV1,TRPM4,HBEGF,NPR3,OGN,IL33,PF4,IGF2,HP1BP3,COL18A1,DLG3,ADAM17,CAV2,DDAH1,CLEC11A,FAP,TMEM119,NRP1,GNAI2,PDGFRB,ITGAV,SPEG,CDK4,BAD,PTN,PODN,LTBP3,CACUL1,STX3,CD74,INSR,ECM1,ACE,GJA1,MECP2,HLA-DRB1,PDCD6,MEF2D,STAT5B,S100A13,HRG,NES,TCIRG1,RAB3…	1.42415	0.315879	127	414
RIBOSE PHOSPHATE METABOLIC PROCESS%GOBP%GO:0019693	RIBOSE PHOSPHATE METABOLIC PROCESS%GOBP%GO:0019693	0.000972763	0.00863351	-1	ENO3,PMVK,HINT1,ACACB,HK3,MVD,NDUFS7,GPI,ALDOC,NDUFA12,IMPDH1,FOXK2,OLA1,PDE2A,NUDT4,ACAT1,MVK,ALDOA,ACSF2,MYH6,HMGCS2,ACSS2,HSD17B4,PFKM,PFAS,PFKFB1,NDUFA10,NDUFB7,ENO1,MFN1,ADSL,NDUFA6,ACOT2,NUDT18,PAPSS2,HSPA1B,LDHA,GCDH,PGAM2,PPT1,NDUFAB1,NDUFV2,NDUFB3,ACOT8,GMPS,NDUFA5,TPI1,IMPDH2,RFK,ELOVL1,SUCLG2	-1.4665	-0.336958	51	205
RESPONSE TO OXYGEN-CONTAINING COMPOUND%GOBP%GO:1901700	RESPONSE TO OXYGEN-CONTAINING COMPOUND%GOBP%GO:1901700	0.000974026	0.00863351	1	IGF1R,PPBP,HBB,TGM2,POSTN,IGFBP5,TGFB2,GNAO1,FYN,GNA14,TGFB1,AGRN,CACNA2D1,PKD2,RAB31,CAV1,FLNA,ATP2B4,EPHA3,OVCA2,PF4,IGF2,SLC9A1,GNAI1,AGAP3,ADAM17,RARRES2,SNCA,CAV2,PRKAA2,MTOR,NT5E,ANKRD1,RPTOR,APOA4,ENPP1,RAP1B,NFKBIB,VIM,GNA11,INSR,SMAD2,GJA1,DMTN,RAB11FIP5,ROCK1,SOD3,CAMK2A,PTK7,SORT1,STAT5B,PXN,ZBTB20,PFKL,CALCRL,GNAS,SLC2A1,TGFB3,RAB10,STK25,GNAQ,CDC73,SLC2A4,EIF2B5,WNT9B,PSEN1,AKAP9,APP…	1.44387	0.324589	85	351
RESPONSE TO NITROGEN COMPOUND%GOBP%GO:1901698	RESPONSE TO NITROGEN COMPOUND%GOBP%GO:1901698	0.000992063	0.00877411	1	IGF1R,TGM2,IGFBP5,MUL1,GNAO1,FYN,GNA14,RFTN1,AGRN,CACNA2D1,PKD2,RAB31,CAV1,FLNA,ATP2B4,CANX,IGF2,SLC9A1,GNAI1,RARRES2,SNCA,CAV2,MTOR,NT5E,CD9,RPTOR,ENPP1,RAP1B,VIM,GNA11,INSR,GJA1,DMTN,ROCK1,CAMK2A,SORT1,STAT5B,TOR1A,PXN,GNAS,ITGB1,SLC2A1,FAF2,FLOT1,RAB10,GNAQ,SLC2A4,TLR3,EIF2B5,PSEN1,AKAP9,APP,PTPN2,STAT4,RALB,ACTB,RAPGEF1,RCN3,ATXN3,SORBS1,BAG6,RAB8A,ATP1A3,PRKDC,ERLIN2,ERLIN1,COLEC12,TYK2,LPIN…	1.45669	0.333685	74	285
NEGATIVE REGULATION OF DEVELOPMENTAL PROCESS%GOBP%GO:0051093	NEGATIVE REGULATION OF DEVELOPMENTAL PROCESS%GOBP%GO:0051093	0.00102232	0.00902192	1	RTN4,THBS4,TGFB2,MUL1,COL4A2,SEMA3D,TGFB1,HSPG2,THBS2,CRIM1,ITGB3,IL17D,EMILIN1,CAV1,TRPM4,ATP2B4,PF4,SEMA5B,IGF2,ASPN,DCN,TMEM119,COL5A1,ITGAV,LOXL2,MARK1,THY1,PTN,MAP2,ENPP1,SEMA3C,CORO1C,ECM1,LRRC17,ACTN4,DMTN,MECP2,ROCK1,HRG,AGO1,HGS,CDC73,TLR3,WNT9B,PTPN11,INPP5D,VAT1,PTPN2,DAB2IP,ACTB,COL4A3,METTL14,PTPRM,LOXL3,EFEMP1,FERMT2,FZD7,GBP1,APCS,HDAC2,C1QC,EGFR,NOS3,CHRD	1.54226	0.366684	64	197
POSITIVE REGULATION OF INTERLEUKIN-1 PRODUCTION%GOBP%GO:0032732	POSITIVE REGULATION OF INTERLEUKIN-1 PRODUCTION%GOBP%GO:0032732	0.00103434	0.00910806	-1	ORM1,STAT3,ORM2,SAA1	-1.86564	-0.668865	4	19
PURINE NUCLEOSIDE DIPHOSPHATE METABOLIC PROCESS%GOBP%GO:0009135	PURINE NUCLEOSIDE DIPHOSPHATE METABOLIC PROCESS%GOBP%GO:0009135	0.00105485	0.00925362	-1	ENO3,HK3,GPI,ALDOC,FOXK2,ALDOA,PFKM,PFKFB1,ENO1,NUDT18,LDHA,PGAM2,TPI1	-1.82717	-0.595876	13	28
SECONDARY ALCOHOL METABOLIC PROCESS%GOBP%GO:1902652	SECONDARY ALCOHOL METABOLIC PROCESS%GOBP%GO:1902652	0.00105753	0.00925362	-1	PMVK,IDH2,MVD,IDH1,HMGCR,SCARF1,OSBPL1A,MVK,FDX1,AKR1D1,GBA,ACAA2	-1.8185	-0.557932	12	36
RIBONUCLEOSIDE DIPHOSPHATE METABOLIC PROCESS%GOBP%GO:0009185	RIBONUCLEOSIDE DIPHOSPHATE METABOLIC PROCESS%GOBP%GO:0009185	0.00105775	0.00925362	-1	ENO3,HK3,GPI,ALDOC,FOXK2,ALDOA,PFKM,PFKFB1,ENO1,NUDT18,LDHA,PGAM2,RRM2B,TPI1	-1.77105	-0.554528	14	33
TUBE MORPHOGENESIS%GOBP%GO:0035239	TUBE MORPHOGENESIS%GOBP%GO:0035239	0.00106629	0.00930809	1	MCAM,COL22A1,EGFL7,TGFB2,EPHB4,COL4A1,TGFB1,TGFBI,PKD2,RECK,ITGB3,CAV1,COL18A1,NRP1,PLXDC1,CALD1,JAM3,PDGFRB,ITGAV,LOXL2,THY1,LUZP1,MICAL2,ANXA2,S1PR1,PLXNB2,MYLK,CALCRL,PXDN,SCRIB,NPNT,RHOA,DAB2IP,SRPK2,COBL,PRKD2,ACTG1,FGF1,MYH9,PTK2,FLT1,CUL7	1.61025	0.413826	42	110
PROTEIN LOCALIZATION TO CELL PERIPHERY%GOBP%GO:1990778	PROTEIN LOCALIZATION TO CELL PERIPHERY%GOBP%GO:1990778	0.00107643	0.0093763	1	ANK1,SLC9A3R1,RAB31,CAV1,EFR3A,KIF13A,FLNA,RAB34,SPTBN1,SLMAP,RAB8B,FLOT2,RILPL1,GOLGA4,TTC7B,MYADM,STX3,AP4M1,ROCK1,GOLGA7,EHD3,FLOT1,RAB10,SCRIB,NSF,ATP1B3,FCHO2,RABEP1,PACS1,RAB8A,DLG1	1.5851	0.415137	31	98
REGULATION OF NERVOUS SYSTEM DEVELOPMENT%GOBP%GO:0051960	REGULATION OF NERVOUS SYSTEM DEVELOPMENT%GOBP%GO:0051960	0.0010805	0.00939148	1	JAM2,TGM2,RTN4,SEMA3D,TGFB1,PLXNA1,AGRN,DBNL,SRPX2,SEMA5B,DOCK7,NRP1,DBN1,CAMK2B,SS18L1,THY1,PTN,GOLGA4,MAP2,SERPINE2,SEMA3C,RELN,NPTN,PLXNB2	1.64099	0.43606	24	88
MORPHOGENESIS OF AN EPITHELIUM%GOBP%GO:0002009	MORPHOGENESIS OF AN EPITHELIUM%GOBP%GO:0002009	0.0010931	0.00946235	1	DAG1,TGFB2,COL4A1,TGFB1,LAMA5,PKD2,SLC9A3R1,FLNA,ADAM17,NRP1,COL5A1,LUZP1,MICAL2,ARHGAP35,CD44,LAMA3,TOR1A,PLXNB2,ITGB1,RAB10,SCRIB,NPNT,VCL,RHOA,ACTB,COBL,PRKD2,ACTG1,FGF1,DDR1	1.69826	0.468793	30	71
MODULATION OF CHEMICAL SYNAPTIC TRANSMISSION%GOBP%GO:0050804	MODULATION OF CHEMICAL SYNAPTIC TRANSMISSION%GOBP%GO:0050804	0.00109409	0.00946235	1	SYNGR1,STX4,CASK,DLGAP4,HOMER1,DBN1,CAMK2B,PTN,RAP1B,ERC1,ACE,RELN,BTBD9,NPTN,CAMK2A,ITGB1,FMR1,CPLX1,FLOT1,AKAP9,APP,APOE,MAP1A	1.67743	0.460456	23	73
FCGAMMA RECEPTOR (FCGR) DEPENDENT PHAGOCYTOSIS%REACTOME%R-HSA-2029480.1	FCGAMMA RECEPTOR (FCGR) DEPENDENT PHAGOCYTOSIS%REACTOME%R-HSA-2029480.1	0.00109569	0.00946235	1	FYN,ABI1,WIPF3,ITPR1,CYFIP1,MYO1C,ACTR3,MYO9B,ACTB,ACTR2,VAV2,NCKIPSD,NCK1,ITPR3,NCKAP1,ACTG1,MYH9,PTK2,ELMO2,DOCK1,PLCG1,WIPF2,WASL,PLCG2,ARPC5,ITPR2,MAPK1	1.69059	0.469245	27	69
EPH-EPHRIN SIGNALING%REACTOME DATABASE ID RELEASE 81%2682334	EPH-EPHRIN SIGNALING%REACTOME DATABASE ID RELEASE 81%2682334	0.00110213	0.00949764	1	SDC2,EPHB4,FYN,MYH10,EPHA3,MYH11,KALRN,DNM1,ROCK1,ACTR3,PSEN1,RHOA,ACTB,ACTR2,VAV2,MYL6,ACTG1,MYH9,AP2A2,NCK2,PTK2,WASL,MYL12A,ARPC5,MYH14,LYN,CLTC,ROCK2,HRAS,MYL9	1.77131	0.510117	30	56
TCF DEPENDENT SIGNALING IN RESPONSE TO WNT%REACTOME DATABASE ID RELEASE 81%201681	TCF DEPENDENT SIGNALING IN RESPONSE TO WNT%REACTOME DATABASE ID RELEASE 81%201681	0.00111857	0.00961873	-1	PSME2,PSMA4,PSME1,PSMD14,PSMB6,PSMA1,PSMB3,PSMA7,USP8,PSMB4,RUVBL1,PPP2CA,PSMC2,PSMB7,PSMA6,PPP2CB,PSMB2,PSMA2,PSMD7,PSMB8,PSMA3,PSMD5,PSMC1,CTNNBIP1,PPP2R5D,PPP2R5C,YWHAZ,RBX1,EP300,PSMC5,PPP2R1A,PSMD1,LEO1	-1.65652	-0.428351	33	85
AEROBIC RESPIRATION%GOBP%GO:0009060	AEROBIC RESPIRATION%GOBP%GO:0009060	0.00113869	0.00977095	-1	ME3,NDUFS7,COX6A2,NDUFA12,UQCC3,UQCRH,UQCRB,MDH1,NDUFA10,NDUFB7,NDUFA6,UQCRQ,NDUFAB1,FH,NDUFV2,NDUFB3,NDUFA5,MDH2,NDUFA4,UQCR11,COA6,SUCLG2,NDUFB9,NDUFS3,UQCRC1,UQCR10,SUCLA2,NDUFA11,MT-ND1,NDUFA9,MT-ATP6,NDUFS6,NDUFS1,SUCLG1,NDUFS8,ACO1,NDUFS4,NDUFB6,NDUFC2,NDUFS2,NDUFV1,NDUFB8,COX5B,NDUFAF1,ACO2,COX5A,COX6B1,NDUFB4,NDUFA2,NDUFS5	-1.604	-0.402655	50	104
NUCLEOSIDE TRIPHOSPHATE METABOLIC PROCESS%GOBP%GO:0009141	NUCLEOSIDE TRIPHOSPHATE METABOLIC PROCESS%GOBP%GO:0009141	0.00114312	0.00977403	-1	ENO3,SAMHD1,HK3,NDUFS7,GPI,ALDOC,NDUFA12,IMPDH1,FOXK2,OLA1,ALDOA,MYH6,PFKM,PFKFB1,NDUFA10,NDUFB7,ENO1,MFN1,NDUFA6,AK1,HSPA1B,LDHA,PGAM2,NDUFAB1,CMPK2,NDUFV2,NDUFB3,NDUFA5,TPI1,NUDT16,IMPDH2,NUDT15,NDUFB9,DCTPP1,NDUFS3,NDUFA11,MT-ND1,NDUFA9,MT-ATP6,PKM,NDUFS6,NDUFS1,NDUFS8,NDUFS4,NDUFB6,NDUFC2,NDUFS2,GAPDH,PARG,NDUFV1,NDUFB8,MYH3	-1.60493	-0.39452	52	120
LIPID CATABOLIC PROCESS%GOBP%GO:0016042	LIPID CATABOLIC PROCESS%GOBP%GO:0016042	0.00114495	0.00977403	-1	PCK2,HADHA,DECR1,LYPLA2,PRDX6,HADHB,CPT2,SCARF1,ACAT1,PLBD2,FUCA1,BCO2,HSD17B4,SIRT2,AKR1D1,GBA,ACADVL,ECHS1,PLA2G4C,ACAA2,GCDH,ECI2,PNPLA2,PPT1,ACOT8,ADIPOQ,SCP2,ACAT2,ASAH1,LIPE,PCCB,HADH,AUH,SRD5A3,GM2A,ABHD6,AKR1C3,NEU1,CRAT	-1.60783	-0.399546	39	112
REGULATION OF AXON EXTENSION%GOBP%GO:0030516	REGULATION OF AXON EXTENSION%GOBP%GO:0030516	0.00115031	0.00977403	1	RTN4,CTTN,SEMA3D,DBNL,SEMA5B,NRP1,DBN1,GOLGA4,MAP2,SEMA3C	1.83302	0.62742	10	25
POSITIVE REGULATION OF CALCIUM ION TRANSMEMBRANE TRANSPORT%GOBP%GO:1904427	POSITIVE REGULATION OF CALCIUM ION TRANSMEMBRANE TRANSPORT%GOBP%GO:1904427	0.00115031	0.00977403	1	CACNA2D1,PKD2,CAV1,TRDN,JPH2,SLC9A1,PPP3CC,SNCA,THY1	1.84006	0.629831	9	25
CELL-SUBSTRATE JUNCTION ORGANIZATION%GOBP%GO:0150115	CELL-SUBSTRATE JUNCTION ORGANIZATION%GOBP%GO:0150115	0.00115119	0.00977403	1	ACTN1,ITGB4,CTTN,DST,CDH11,RAB8B,THY1,ITGA6,SORBS1,FERMT2,PEAK1,PLEC,TAOK2,LAMC1	1.83717	0.639999	14	23
CELLULAR RESPONSE TO OXYGEN-CONTAINING COMPOUND%GOBP%GO:1901701	CELLULAR RESPONSE TO OXYGEN-CONTAINING COMPOUND%GOBP%GO:1901701	0.00115359	0.00977403	1	IGF1R,PPBP,TGM2,POSTN,IGFBP5,GNAO1,FYN,GNA14,TGFB1,AGRN,CACNA2D1,PKD2,RAB31,CAV1,FLNA,ATP2B4,EPHA3,PF4,IGF2,SLC9A1,GNAI1,AGAP3,RARRES2,SNCA,CAV2,PRKAA2,MTOR,ANKRD1,RPTOR,APOA4,ENPP1,RAP1B,NFKBIB,VIM,GNA11,INSR,GJA1,DMTN,RAB11FIP5,SOD3,CAMK2A,PTK7,STAT5B,PXN,ZBTB20,CALCRL,GNAS,RAB10,STK25,GNAQ,CDC73,SLC2A4,WNT9B,PSEN1,AKAP9,APP,FAM210B,RHOA,PTPN2,DAB2IP,ACTB,RAPGEF1,UNC13B,SORBS1,FZD7,RAB8A,ATP1A3…	1.47192	0.337543	74	280
SIGNALING BY RECEPTOR TYROSINE KINASES%REACTOME DATABASE ID RELEASE 81%9006934	SIGNALING BY RECEPTOR TYROSINE KINASES%REACTOME DATABASE ID RELEASE 81%9006934	0.00116318	0.00982053	1	IGF1R,THBS4,LAMB2,FYN,COL4A1,COL4A2,LAMA5,POLR2I,ABI1,CILP,THBS2,ITGB3,CAV1,HBEGF,COL6A1,ITPR1,IGF2,KIDINS220,COL6A3,COL6A2,ADAM17,CYFIP1,DOCK7,NRP1,MTOR,POLR2B,PDGFRB,ITGAV,LAMA2,PTN,ATP6V1C1,STAM,RAP1B,DNM1,INSR,CBL,ROCK1,MEF2D,STAT5B,LAMA3,PXN,ITGB1,THBS3,TCIRG1,STMN1,MEMO1,HGS,LAMA4,PTPN11,PSEN1,RICTOR,RHOA,PTPN2,SHB,APOE,RALB,COL4A3,RAPGEF1,GAB2,VAV2,PLAT,PIK3R4,NCK1,ITPR3,HDAC2,EGFR,NCKAP1,…	1.519	0.351741	85	254
MICROTUBULE-BASED PROCESS%GOBP%GO:0007017	MICROTUBULE-BASED PROCESS%GOBP%GO:0007017	0.00116395	0.00982053	1	MID1,DAG1,FBXW11,EML4,BICD1,TUBB8,DCLK2,PKD2,SLC9A3R1,KIF13A,FLNA,SPIRE1,ATP2B4,TRDN,DST,PIBF1,CENPA,DOCK7,MAP4,PHLDB2,TUBB1,MARK1,MAPRE2,NDE1,MAP2,TPPP3,CLIP2,TUBGCP6,TAOK1,GJA1,MECP2,KLC4,CUL9,LLGL1,ITGB1,STMN1,TUBB4B,KIFAP3,CAMSAP1,SPG11,AKAP9,APP,TUBB,MAP7D3,RHOA,ARL8A,DYNC1H1,DYNLT3,CCSER2,MAP1A,ATXN3,PPP1R12A,KIF3B,TUBA8,TUBA1A,KPNB1,DLG1,RAB6A,STAG2,LMNA,AP3B1,CLASP1,SLK,IFT57,EML3,CUL7,MA…	1.51148	0.350652	79	250
NCRNA PROCESSING%GOBP%GO:0034470	NCRNA PROCESSING%GOBP%GO:0034470	0.00118793	0.0100019	-1	TRMU,PIN4,TRMT6,PIH1D1,ZBTB8OS,NOL9,ZC3H7B,TRMT1,WDR6,WDR36,TPRKB,DDX47,UTP15,TRMT112,RPS16,RPS7,TSNAX,METTL5,NCBP2,TFB1M,ELP4,YRDC,MOCS3,TRMT61B,EXOSC3,MDN1,RPS17,ELAC2,NOP2,XRN2,SSB,METTL2A,ELP6,MRTO4,TSR2,RPS24,THUMPD3,RRS1,BMS1,C9ORF64,NSUN6,RPS27,UTP6,EXOSC9,SRSF3,INTS6,PUM2,RPS21,TSN,OSGEP,FBL,ELP2,RPS15,EXOSC7,DDX49,EXOSC10	-1.49752	-0.348595	56	181
REGULATION OF CATION TRANSMEMBRANE TRANSPORT%GOBP%GO:1904062	REGULATION OF CATION TRANSMEMBRANE TRANSPORT%GOBP%GO:1904062	0.00123894	0.0103954	1	DMD,FYN,CACNA2D1,UTRN,PKD2,FXYD1,SLC9A3R1,CAV1,FLNA,ATP2B4,TRDN,JPH2,SLC9A1,PPP3CC,SNCA,SLMAP,HOMER1,THY1,PLN,RELN,ACTN4,ITGB1,ISCU,FMR1,ANO6,ATP1B3,AKAP9,APP,AHNAK,VDAC1,DLG1,STIM1,ACE2,NPPA,FHL1,YWHAH,CAMK2D,PLCG1,HRC,BIN1	1.60248	0.412689	40	108
EMBRYO DEVELOPMENT%GOBP%GO:0009790	EMBRYO DEVELOPMENT%GOBP%GO:0009790	0.00123982	0.0103954	1	MFAP5,ITGB4,TGFB2,COL12A1,COL4A2,TGFB1,PKD2,ITGB3,COL6A1,IGF2,ITGB5,COL8A1,RARRES2,ECE1,MFAP2,ITGAV,LUZP1,MICAL2,PEF1,SMAD2,COL1A1,ROCK1,PDCD6,LAMA3,PLXNB2,NES,ITGB1,ITGA7,TGFB3,CUL3,FBN2,USP22,CREBBP,KIAA1217,CDC73,SCRIB,RICTOR,NOLC1,POLR1B,LOXL3,EFEMP1,COBL,HDAC2,TCOF1,TBC1D23	1.57592	0.395723	45	130
GLUCONEOGENESIS%BIOCYC%PWY66-399	GLUCONEOGENESIS%BIOCYC%PWY66-399	0.00125156	0.0104721	-1	ENO3,GPI,ALDOC,ALDOA,MDH1,ENO1,PGAM2,TPI1,MDH2	-1.82278	-0.68572	9	16
PURINE RIBONUCLEOSIDE DIPHOSPHATE METABOLIC PROCESS%GOBP%GO:0009179	PURINE RIBONUCLEOSIDE DIPHOSPHATE METABOLIC PROCESS%GOBP%GO:0009179	0.00126556	0.0105673	-1	ENO3,HK3,GPI,ALDOC,FOXK2,ALDOA,PFKM,PFKFB1,ENO1,NUDT18,LDHA,PGAM2,TPI1	-1.84894	-0.609266	13	27
OSSIFICATION%GOBP%GO:0001503	OSSIFICATION%GOBP%GO:0001503	0.00128229	0.0106848	1	TGFB1,VCAN,COL6A1,EXT2,CLEC3B,CDH11,ASPN,RRAS2,CLEC11A,TMEM119,PTN,ENPP1,LRRC17,COL1A1,ITGA11,MRC2,TGFB3,SNRNP200,DNAJC13,RHOA,BCAP29,EGFR,HSPE1,RRBP1,MYOC,RBMX,TPM4,CAT,NF1,INPPL1	1.70847	0.481139	30	64
POSITIVE REGULATION OF CELL-SUBSTRATE ADHESION%GOBP%GO:0010811	POSITIVE REGULATION OF CELL-SUBSTRATE ADHESION%GOBP%GO:0010811	0.00128913	0.0106977	1	COL16A1,RIN2,RRAS,UTRN,ABI3BP,FLNA,NRP1,THY1,MYADM,MAP4K4,DMTN,ROCK1,HRG,LIMS1,NPNT,TRIOBP,FBLN2,FERMT2,ILK,DOCK5,DOCK1,MYOC,FGG,FGB,RSU1,FGA,EFEMP2	1.75187	0.509527	27	53
POSITIVE REGULATION OF ION TRANSMEMBRANE TRANSPORT%GOBP%GO:0034767	POSITIVE REGULATION OF ION TRANSMEMBRANE TRANSPORT%GOBP%GO:0034767	0.00128913	0.0106977	1	DMD,CACNA2D1,PKD2,FXYD1,CAV1,FLNA,TRDN,JPH2,SLC9A1,PPP3CC,SNCA,THY1,RELN,ACTN4,ITGB1,ANO6,ATP1B3,AKAP9,STIM1,ACE2,NPPA	1.7412	0.506423	21	53
POSITIVE REGULATION OF NEUROGENESIS%GOBP%GO:0050769	POSITIVE REGULATION OF NEUROGENESIS%GOBP%GO:0050769	0.00129702	0.010741	1	TGM2,TGFB1,PLXNA1,DBNL,NRP1,DBN1,CAMK2B,SS18L1,PTN,GOLGA4,SERPINE2,RELN,NPTN,PLXNB2,MME,PLXNA2	1.75898	0.526644	16	46
CELLULAR MACROMOLECULE CATABOLIC PROCESS%GOBP%GO:0044265	CELLULAR MACROMOLECULE CATABOLIC PROCESS%GOBP%GO:0044265	0.00130548	0.010789	-1	RCHY1,DERL1,PSMA4,PCNP,UBE2G1,POLR2G,ASB2,NEDD8,ADRM1,PSMD14,PSMB6,CHMP2B,ZFP36L1,LNX1,CHMP2A,UBE2K,PSMA1,PSMB3,MANBA,PSMA7,DNASE2,PSMB4,VPS25,NUDT16L1,PSMC2,PSMB7,SHARPIN,PSMA6,MAGOH,UBXN2B,MIB1,SIRT2,NUB1,VPS4A,SNF8,PSMB2,PSMA2,PSMD7,NCBP2,NT5C3B,EDC3,AMN1,CHMP7,UBE2D4,GSK3A,HSPA1B,EXOSC3,PSMA3,WDR81,NGLY1,GSPT1,PABPC4,NEDD4L,VPS37A,ARRDC1,ELAC2,FAF1,XRN2,UBE2B,SSB,NUDT16,FBXL18,CUL4B,PSMC1,CLG…	-1.38813	-0.300898	107	352
REGULATION OF RHO PROTEIN SIGNAL TRANSDUCTION%GOBP%GO:0035023	REGULATION OF RHO PROTEIN SIGNAL TRANSDUCTION%GOBP%GO:0035023	0.00132576	0.0109341	1	SYNPO2L,HEG1,COL3A1,NRP1,AKAP13,ARHGAP35,STMN1,CUL3,MYO9B,RALBP1,KCTD10,APOE,ARRB1,KANK2,RAF1,ARHGEF2,MYOC	1.77207	0.556661	17	37
WNT SIGNALING%WIKIPATHWAYS_20220510%WP428%HOMO SAPIENS	WNT SIGNALING%WIKIPATHWAYS_20220510%WP428%HOMO SAPIENS	0.00132953	0.0109429	1	PLCB4,ROR1,CAMK2G,DAAM1,PPP3CC,CSNK2A2,CAMK2A,CSNK1A1,CCND2,FZD7,CSNK2A1,CAMK2D,CSNK1E,ROCK2,APC,CTNNB1,ROR2	1.80925	0.584646	17	32
OXIDATIVE PHOSPHORYLATION%GOBP%GO:0006119	OXIDATIVE PHOSPHORYLATION%GOBP%GO:0006119	0.0013468	0.0110624	-1	NDUFS7,COX6A2,NDUFA12,UQCC3,UQCRH,UQCRB,NDUFA10,NDUFB7,NDUFA6,UQCRQ,NDUFAB1,NDUFV2,NDUFB3,NDUFA5,NDUFA4,UQCR11,COA6,NDUFB9,NDUFS3,UQCRC1,UQCR10,NDUFA11,MT-ND1,NDUFA9,MT-ATP6,NDUFS6,NDUFS1,NDUFS8,NDUFS4,NDUFB6,NDUFC2,NDUFS2,NDUFV1,NDUFB8,COX5B,NDUFAF1,COX5A,COX6B1,NDUFB4,NDUFA2,NDUFS5	-1.62495	-0.424156	41	81
POSITIVE REGULATION OF PHOSPHORYLATION%GOBP%GO:0042327	POSITIVE REGULATION OF PHOSPHORYLATION%GOBP%GO:0042327	0.00135433	0.0111016	1	IGF1R,THBS4,TGFB2,EPHB4,ROR1,TGFB1,INHBE,PKD2,ITGB3,TPD52L1,CAV1,HBEGF,ATP2B4,EPHA3,PRKAG1,IGF2,PIBF1,DLG3,ADAM17,RARRES2,SNCA,TAOK3,DOCK7,PRKAA2,TMEM119,NRP1,MTOR,PDGFRB,BAD,RPTOR,CACUL1,CD74,INSR,SLC4A4,ACE,RELN,HLA-DRB1,NPTN,CD44,ZBTB20,FMR1,FLOT1,TGFB3,RB1CC1,TLR3,RALBP1,PTPN11,PSEN1,AKAP9,CCND2,APP,RHOA,DAB2IP,RALB,GPNMB,ITGA6,FERMT2,FZD7,PIK3R4,ILK,ARRB1,LMTK2,PRKAA1,PRKD2,FXR1,TBK1,EGFR,FG…	1.55179	0.364871	89	222
ORGANIC HYDROXY COMPOUND METABOLIC PROCESS%GOBP%GO:1901615	ORGANIC HYDROXY COMPOUND METABOLIC PROCESS%GOBP%GO:1901615	0.00137741	0.0112679	-1	PMVK,IMPA2,RETSAT,IDH2,PCK2,ITPKB,MVD,IDH1,HMGCR,SCARF1,OSBPL1A,NUDT4,MVK,FDX1,ALDH2,ACSS2,PARK7,AKR1D1,PTGR1,GBA,LDHB,ITPK1,GOT1,PGP,ADH1B,GPD2,ACAA2,LDHA,CYP7B1,PTEN,ACOT8,NQO1,RBP4,TPI1,SCP2,AKR1B1,ASAH1,QDPR,IMPA1	-1.5318	-0.372446	39	130
RIBONUCLEOPROTEIN COMPLEX ASSEMBLY%GOBP%GO:0022618	RIBONUCLEOPROTEIN COMPLEX ASSEMBLY%GOBP%GO:0022618	0.0013844	0.0113002	-1	CD2BP2,PIH1D1,EIF5,PTGES3,SNRPG,RUVBL1,SNRPB2,BRIX1,SNRPD3,EIF3I,SNRPA1,CELF2,SNRPF,MDN1,TXNL4A,NUDT21,RUVBL2,STRAP,SF3A2,LSM4,NOP2,EIF3F,EIF3M,EIF2S3,LSM2,CPSF6,EIF3J,DENR,RRS1,EIF4B,RPS27,SNRPE,RPSA,GEMIN6,SRSF10,RPS15,DHX29,SCAF11,AAR2,XRCC5,SNRPC,CPSF7,RPS5,RPLP0,ISY1,MCTS1,CLNS1A,HSP90AB1,EIF2S2,NCBP1,HSP90AA1,PRPF31,EIF3D,RPS19,FASTKD2,EIF6,SRSF6,ERAL1,DDX28,SRSF5,RBM5	-1.52167	-0.363711	61	146
RIBONUCLEOPROTEIN COMPLEX SUBUNIT ORGANIZATION%GOBP%GO:0071826	RIBONUCLEOPROTEIN COMPLEX SUBUNIT ORGANIZATION%GOBP%GO:0071826	0.00138696	0.0113002	-1	CD2BP2,PIH1D1,EIF5,PTGES3,SNRPG,RUVBL1,SNRPB2,BRIX1,SNRPD3,EIF3I,SNRPA1,CELF2,SNRPF,MDN1,TXNL4A,NUDT21,RUVBL2,STRAP,SF3A2,LSM4,NOP2,EIF3F,TFIP11,EIF3M,EIF2S3,LSM2,CPSF6,EIF3J,DENR,RRS1,EIF4B,RPS27,SNRPE,RPSA,GEMIN6,SRSF10,RPS15,DHX29,SCAF11,AAR2,XRCC5,SNRPC,CPSF7,RPS5,RPLP0,ISY1,MCTS1,CLNS1A,HSP90AB1,EIF2S2,NCBP1,HSP90AA1,PRPF31,EIF3D,RPS19,FASTKD2,EIF6,SRSF6,ERAL1,DDX28,SRSF5,RBM5	-1.51166	-0.359566	62	151
REGULATION OF ANATOMICAL STRUCTURE SIZE%GOBP%GO:0090066	REGULATION OF ANATOMICAL STRUCTURE SIZE%GOBP%GO:0090066	0.00140081	0.01139	1	RTN4,CTTN,SEMA3D,SLC9A3R1,DBNL,SVIL,CAV1,TRPM4,SEMA5B,FCHSD2,HP1BP3,ECE1,ESAM,NRP1,MTOR,DBN1,RPTOR,GOLGA4,MAP2,SEMA3C,MYADM,ARHGAP35,ACE,LIMA1,ROCK1,SLC12A7,GSN,CDC42EP1,LMOD2,ATP2B1,SSH3,ANO6,RHOA,APOE,TRIOBP,SLC12A4,VAV2,NCK1,GCLC,DOCK5,ACE2,CLCN6,NCKAP1,NOS3,DNM2,NCK2,ACTA2,PICALM,BIN1,FGG,CXCL12,FER,ARF6,DIP2B,VASP,CDC42EP3,FGB,LMOD1	1.56484	0.384015	58	154
CLASS I MHC MEDIATED ANTIGEN PROCESSING & PRESENTATION%REACTOME DATABASE ID RELEASE 81%983169	CLASS I MHC MEDIATED ANTIGEN PROCESSING & PRESENTATION%REACTOME DATABASE ID RELEASE 81%983169	0.00147203	0.0119451	-1	PSME2,RCHY1,ASB11,PSMA4,UBE2G1,ASB2,PSME1,UBE2V1,LRSAM1,CD14,UBE2N,PSMD14,PSMB6,NCF2,GLMN,LNX1,UBE2K,PSMA1,PSMB3,UBE2Z,PSMA7,PSMB4,NPEPPS,VAMP8,ZBTB16,PSMC2,PSMB7,ASB15,PSMA6,MRC1,PSMB2,PSMA2,UBE2V2,PSMD7,UBE2M,UBE2D4,PSMB8,PSMA3,UBE2F,NEDD4L,PSMD5,TRIM63,KLHL21,UBE2B,FBXL18,PSMC1,TAP1,NEDD4,UBA3,CUL2,CALR,RBCK1,ASB8	-1.43769	-0.328626	53	215
POSITIVE REGULATION OF NERVOUS SYSTEM DEVELOPMENT%GOBP%GO:0051962	POSITIVE REGULATION OF NERVOUS SYSTEM DEVELOPMENT%GOBP%GO:0051962	0.00147956	0.0119821	1	TGM2,TGFB1,PLXNA1,AGRN,DBNL,SRPX2,NRP1,DBN1,CAMK2B,SS18L1,PTN,GOLGA4,SERPINE2,RELN,NPTN,PLXNB2,MME,PLXNA2	1.7446	0.515508	18	49
HIPPO-MERLIN SIGNALING DYSREGULATION%WIKIPATHWAYS_20220510%WP4541%HOMO SAPIENS	HIPPO-MERLIN SIGNALING DYSREGULATION%WIKIPATHWAYS_20220510%WP4541%HOMO SAPIENS	0.00151229	0.0122226	1	IGF1R,PLCB4,ITGB4,ITGA1,ITGB3,CTGF,ITGB5,CDH11,ITGAV,INSR,CD44,AJUBA,ITGB1,ITGA7	1.79644	0.560178	14	38
STABILIZATION AND EXPANSION OF THE E-CADHERIN ADHERENS JUNCTION%PATHWAY INTERACTION DATABASE NCI-NATURE CURATED DATA%STABILIZATION AND EXPANSION OF THE E-CADHERIN ADHERENS JUNCTION	STABILIZATION AND EXPANSION OF THE E-CADHERIN ADHERENS JUNCTION%PATHWAY INTERACTION DATABASE NCI-NATURE CURATED DATA%STABILIZATION AND EXPANSION OF THE E-CADHERIN ADHERENS JUNCTION	0.00152468	0.0122981	1	IGF1R,ACTN1,STX4,ABI1,LIMA1,ROCK1,ENAH,PIP5K1C,VCL,RHOA,EXOC3,NCK1,EGFR,NCKAP1,MYO6,ARF6,VASP,EXOC4	1.80608	0.591798	18	30
SUBSTRATE ADHESION-DEPENDENT CELL SPREADING%GOBP%GO:0034446	SUBSTRATE ADHESION-DEPENDENT CELL SPREADING%GOBP%GO:0034446	0.00152876	0.0123064	1	LAMB2,LAMA5,ITGB3,NRP1,ITGAV,PXN,VAMP3,RHOA,FERMT2,PEAK1,ILK,NTN4,PARVB,SRCIN1,LAMC1,FER,LAMC3	1.83822	0.62238	17	26
EPHB-MEDIATED FORWARD SIGNALING%REACTOME%R-HSA-3928662.2	EPHB-MEDIATED FORWARD SIGNALING%REACTOME%R-HSA-3928662.2	0.00153374	0.0123219	1	SDC2,FYN,KALRN,ROCK1,ACTR3,RHOA,ACTB,ACTR2,ACTG1,PTK2,WASL,ARPC5,LYN,ROCK2,HRAS	1.80404	0.617501	15	25
CELLULAR RESPONSE TO NITROGEN COMPOUND%GOBP%GO:1901699	CELLULAR RESPONSE TO NITROGEN COMPOUND%GOBP%GO:1901699	0.00154136	0.0123585	1	IGF1R,TGM2,IGFBP5,MUL1,GNAO1,FYN,GNA14,AGRN,CACNA2D1,PKD2,RAB31,CAV1,FLNA,ATP2B4,IGF2,SLC9A1,RARRES2,SNCA,CAV2,MTOR,RPTOR,ENPP1,RAP1B,VIM,GNA11,INSR,GJA1,DMTN,CAMK2A,STAT5B,PXN,GNAS,FLOT1,RAB10,GNAQ,SLC2A4,PSEN1,AKAP9,APP,PTPN2,RALB,ACTB,RAPGEF1,SORBS1,RAB8A,ATP1A3,PRKDC,COLEC12,TYK2,LPIN3	1.49632	0.356977	50	193
POSITIVE REGULATION OF SIGNAL TRANSDUCTION%GOBP%GO:0009967	POSITIVE REGULATION OF SIGNAL TRANSDUCTION%GOBP%GO:0009967	0.00158303	0.0126674	1	MID1,IGF1R,SYNPO2L,TGM2,RTN4,TGFB2,TNFSF12,LAMB2,MUL1,ROR1,TGFB1,INHBE,PKD2,NOTCH2,SLC9A3R1,ITGB3,TPD52L1,GLIPR2,CAV1,TRPM4,HBEGF,FLNA,RAB34,IGF2,PIBF1,SLC9A1,COL3A1,MIB2,ADAM17,PPP3CC,CAV2,TAOK3,DCN,NRP1,HOMER1,PDGFRB,ANKRD1,ITGAV,HIP1,SMCR8,LAMA2,MAPRE2,RPTOR,AKAP13,PTGIS,CD74,INSR,ECM1,TAOK1,SMAD2,RELN,ACTN4,GJA1,MAP4K4,DMTN,CDKN2AIP,MYO1C,CBL,HLA-DRB1,COL1A1,ROCK1,NPTN,CD44,CAMK2A,PTK7,S100A1…	1.36915	0.300944	116	458
CELLULAR RESPONSES TO STIMULI%REACTOME%R-HSA-8953897.5	CELLULAR RESPONSES TO STIMULI%REACTOME%R-HSA-8953897.5	0.00160686	0.0128326	-1	FKBP5,PSME2,RPS6KA1,STAT3,SMARCD3,PSMA4,TXNRD1,RPS15A,CDK6,MT1X,NUP43,ATP6V1D,PSME1,HMOX2,BLVRA,PRDX6,GCLM,IDH1,GSTP1,RPS13,PSMD14,PTGES3,PSMB6,MIOS,NCF2,PSMA1,PGD,CDK2,RPS18,PSMB3,PSMA7,PSMB4,HIF1AN,RPS9,PSMC2,PRDX1,PSMB7,DNAJA1,PRKCD,PSMA6,CRTC1,TXNRD2,TXN,RPS16,PSMB2,RPS7,PSMA2,TXN2,ACADVL,PSMD7,EGLN1,TALDO1,GSK3A,MAPK14,HSPA1B,PSMB8,EXOSC3,ATP6V1G1,PSMA3,NOTCH1,RPS4X,MAP2K4,MAPKAPK3,PSMD5,RPS…	-1.36021	-0.289123	170	444
REGULATION OF CELLULAR COMPONENT BIOGENESIS%GOBP%GO:0044087	REGULATION OF CELLULAR COMPONENT BIOGENESIS%GOBP%GO:0044087	0.00161917	0.0129054	1	HSPA2,SYNPO2L,DAG1,TJP1,CTTN,COL16A1,DPYSL3,TGFB1,RABGAP1,AGRN,DBNL,EMILIN1,SVIL,CAV1,SRPX2,EPHA3,FCHSD2,SLC9A1,FARP2,SNCA,ESAM,CYFIP1,PTPRA,MAP4,NRP1,PHLDB2,JAM3,DBN1,PHLDB1,SMCR8,THY1,MYCBP2,MAP2,TPPP3,MYADM,FSCN1,STAM,RAP1B,SACS,TBC1D9B,CORO1C,ARHGAP35,PIEZO1,TLN1,ACE,MAP4K4,DMTN,MYO1C,MECP2,ROCK1,GSN,AJUBA,PXN,HRG,CDC42EP1,SNX18,TBC1D1,FMR1,FLOT1,TGFB3,LMOD2,STMN1,TGFBRAP1,DAPK3,SEC22B,HGS,PL…	1.37983	0.306975	126	398
ENDOMEMBRANE SYSTEM ORGANIZATION%GOBP%GO:0010256	ENDOMEMBRANE SYSTEM ORGANIZATION%GOBP%GO:0010256	0.00165645	0.0131765	1	MYOF,RTN4,RNF26,SYNGR1,STX4,BET1,SLC9A3R1,YIPF4,CAV1,TRAM1,TRDN,ATL3,SPTBN1,DYSF,LMNB1,CAV2,SEC23IP,EMC1,COL5A1,CD9,VTI1A,YIPF5,SEC31A,STAM,STX3,DNM1,CORO1C,SNAP23,SERPINA5,COG5,TMEM43,STX1A,PI4K2A,TOR1A,SNX18,FLOT1,EMC4,ARFGEF2,MYO18A,RAB10,STK25,CSNK1A1,SEC22B,HGS,RTN3,ANXA6,EEA1,NSF,ANO6,LEMD2,PACSIN3,DNAJC13,TRIP11,OSBPL2,COG7,EMC3,LMAN2,BAG6,RAB8A,STX11,LMNA,COLEC12,AP3B1,VAPA,MYH9,ABCD2,SUR…	1.45576	0.335057	86	269
POSITIVE REGULATION OF PHOSPHATE METABOLIC PROCESS%GOBP%GO:0045937	POSITIVE REGULATION OF PHOSPHATE METABOLIC PROCESS%GOBP%GO:0045937	0.00167476	0.0132698	1	IGF1R,THBS4,TGFB2,EPHB4,ROR1,TGFB1,INHBE,PKD2,ITGA1,ITGB3,TPD52L1,CAV1,HBEGF,ATP2B4,EPHA3,PRKAG1,IGF2,PIBF1,DLG3,ADAM17,RARRES2,SNCA,TAOK3,DOCK7,PRKAA2,TMEM119,NRP1,MTOR,PDGFRB,BAD,RPTOR,CACUL1,CD74,INSR,SLC4A4,ACE,RELN,HLA-DRB1,ROCK1,NPTN,CD44,ZBTB20,FMR1,FLOT1,TGFB3,RB1CC1,TLR3,RALBP1,PTPN11,PSEN1,AKAP9,CCND2,APP,RHOA,DAB2IP,RALB,GPNMB,ITGA6,PPP1R12A,FERMT2,FZD7,PIK3R4,ILK,ARRB1,LMTK2,PRKAA1,PR…	1.50241	0.34994	90	243
POSITIVE REGULATION OF PHOSPHORUS METABOLIC PROCESS%GOBP%GO:0010562	POSITIVE REGULATION OF PHOSPHORUS METABOLIC PROCESS%GOBP%GO:0010562	0.00167476	0.0132698	1	IGF1R,THBS4,TGFB2,EPHB4,ROR1,TGFB1,INHBE,PKD2,ITGA1,ITGB3,TPD52L1,CAV1,HBEGF,ATP2B4,EPHA3,PRKAG1,IGF2,PIBF1,DLG3,ADAM17,RARRES2,SNCA,TAOK3,DOCK7,PRKAA2,TMEM119,NRP1,MTOR,PDGFRB,BAD,RPTOR,CACUL1,CD74,INSR,SLC4A4,ACE,RELN,HLA-DRB1,ROCK1,NPTN,CD44,ZBTB20,FMR1,FLOT1,TGFB3,RB1CC1,TLR3,RALBP1,PTPN11,PSEN1,AKAP9,CCND2,APP,RHOA,DAB2IP,RALB,GPNMB,ITGA6,PPP1R12A,FERMT2,FZD7,PIK3R4,ILK,ARRB1,LMTK2,PRKAA1,PR…	1.50241	0.34994	90	243
RRNA MODIFICATION IN THE NUCLEUS AND CYTOSOL%REACTOME DATABASE ID RELEASE 81%6790901	RRNA MODIFICATION IN THE NUCLEUS AND CYTOSOL%REACTOME DATABASE ID RELEASE 81%6790901	0.00168812	0.0133494	-1	WDR36,RPS9,DDX47,UTP15,TRMT112,RPS7,WDR75,NOP2,BMS1,UTP6,FBL,DDX49,RPS2,THUMPD1,PDCD11,RRP9,NOL6,HEATR1,NOL11,TSR3	-1.76277	-0.560743	20	31
PROTEIN LOCALIZATION TO MEMBRANE%GOBP%GO:0072657	PROTEIN LOCALIZATION TO MEMBRANE%GOBP%GO:0072657	0.00170242	0.0134361	1	ANK1,ANO1,RFTN1,AGRN,SLC9A3R1,RAB31,CAV1,EFR3A,TRAM1,SRPRB,KIF13A,FLNA,RAB34,OXA1L,DLG3,SPTBN1,SLMAP,SEC62,RAB8B,FLOT2,RILPL1,EMC1,THY1,PTN,GOLGA4,TTC7B,MYADM,STX3,TIMM22,MYO1C,AP4M1,ROCK1,GOLGA7,EHD3,FLOT1,EMC4,RAB10,HGS,SCRIB,NSF,ATP1B3,APOE,FCHO2,HSPA4,RABEP1,PACS1,EMC3,FERMT2,BAG6,RAB8A,DLG1,RAB6A,SEC63	1.53143	0.362599	53	207
REGULATION OF EXTENT OF CELL GROWTH%GOBP%GO:0061387	REGULATION OF EXTENT OF CELL GROWTH%GOBP%GO:0061387	0.00171985	0.0135472	1	RTN4,CTTN,SEMA3D,DBNL,SEMA5B,NRP1,DBN1,GOLGA4,MAP2,SEMA3C	1.82268	0.61712	10	26
REGULATION OF GROWTH%GOBP%GO:0040008	REGULATION OF GROWTH%GOBP%GO:0040008	0.00174459	0.0137153	1	RTN4,TGFB2,DACT3,MUL1,CTTN,SEMA3D,DCBLD2,TGFB1,RFTN1,AGRN,DBNL,CDA,SEMA5B,ADAM17,LTBP4,NRP1,MTOR,DBN1,MYCBP2,RPTOR,GOLGA4,MAP2,ENPP1,SEMA3C,INSR,GJA1,CDKN2AIP,STAT5B,HRG,RAB33B,APP,RICTOR,APOE,DCUN1D3,ATAD3A,CSNK2A1,EGFR,FHL1,SUPV3L1,DNM2,TAOK2,SIPA1,CAMK2D,MAPKAP1,ARHGEF11	1.51683	0.371651	45	156
ORGANELLE MEMBRANE FUSION%GOBP%GO:0090174	ORGANELLE MEMBRANE FUSION%GOBP%GO:0090174	0.00182949	0.0143459	1	STX4,BET1,YIPF4,RAB34,DYSF,SNCA,CAV2,RAB8B,VTI1A,YIPF5,STX3,SNAP23,STX16,STX1A,TGFBRAP1,SEC22B,VAMP3,PLEKHM1,VPS41,EEA1,RAB8A,STX12,STX7,VAMP7,STX11,STX10,CHMP5,VPS18,BNIP1,VPS33A	1.65136	0.462401	30	66
INFLUENZA VIRAL RNA TRANSCRIPTION AND REPLICATION%REACTOME DATABASE ID RELEASE 81%168273	INFLUENZA VIRAL RNA TRANSCRIPTION AND REPLICATION%REACTOME DATABASE ID RELEASE 81%168273	0.00183192	0.0143459	-1	RPS15A,NUP43,POLR2G,RPS13,RPS18,RPS9,RPS16,RPS7,POLR2H,RPS4X,RPS17,RPLP2,NUP155,RPS12,RPS3,RPS20,RPS24,RPL23,POLR2J,RPS27,RPSA,RPS21,NUP50,RPS15,RPS2,RPS29,RPS5,RPLP0,GTF2F1,NUP160,HSP90AA1,RPL18A,RPS19,RPL37,NUP37,NUP35,POLR2A,NUP153,NUP85,RPL37A,RPL8,RPL34,RPLP1,PARP1,RPL5,RPS28,RPL3L,RPL27A,RPS11,GTF2F2,NUP133,RPL12,RPL13,RPL29,RPL35A,RPS10,RPL11,RPL10A,RPL6,RPS3A,RPL27,FAU,RPL4,RPL30,RPS25,RP…	-1.5462	-0.381294	66	118
RNA PROCESSING%GOBP%GO:0006396	RNA PROCESSING%GOBP%GO:0006396	0.00184308	0.0144053	-1	PPIL1,CD2BP2,AKAP8L,TRMU,PIN4,TRMT6,PIH1D1,ZBTB8OS,NOVA2,NOL9,SNRPG,PAPOLA,ZC3H7B,RBM6,TRMT1,WDR6,WDR36,FASTKD5,TPRKB,PPP2CA,DDX47,SNRPB2,MAGOH,UTP15,DDX39A,TRMT112,RPS16,RPS7,TSNAX,PPIH,METTL5,NCBP2,TFB1M,CDC40,SNRPD3,UBL5,ELP4,SRSF8,YRDC,SNRPA1,MOCS3,TRMT61B,EXOSC3,PPWD1,CELF2,SNRPF,MDN1,TXNL4A,NUDT21,PABPC4,DHX15,PPIL3,RPS17,STRAP,SF3A2,LSM4,ELAC2,NOP2,XRN2,TFIP11,SSB,METTL2A,ELP6,CASC3,PRPF40…	-1.36372	-0.292211	138	406
ENDOPLASMIC RETICULUM ORGANIZATION%GOBP%GO:0007029	ENDOPLASMIC RETICULUM ORGANIZATION%GOBP%GO:0007029	0.0018546	0.0144673	1	RTN4,TRAM1,TRDN,ATL3,CAV2,EMC1,SEC31A,EMC4,RAB10,RTN3,EMC3,LMAN2,BAG6,VAPA,STX18,LPCAT3,EMC7,BNIP1,SEC61A1,TMEM33,LMAN1,CAMLG,SEC16A	1.73143	0.513821	23	48
PLATELET ACTIVATION%GOBP%GO:0030168	PLATELET ACTIVATION%GOBP%GO:0030168	0.00186463	0.0144895	1	HBB,ACTN1,RAP2B,ITGB3,FLNA,PF4,COL3A1,CD9,TLN1,HRG,CSRP1,GNAS,VCL,ACTB,VAV2,ILK,ACTG1,MYH9,FGG,MYL12A,PLCG2,FGB,GP1BB	1.74153	0.525774	23	44
CELL-CELL JUNCTION ASSEMBLY%GOBP%GO:0007043	CELL-CELL JUNCTION ASSEMBLY%GOBP%GO:0007043	0.00186463	0.0144895	1	TJP1,CDH11,ESAM,JAM3,CD9,FSCN1,TLN1,GJA1,ARVCF,PIP5K1C,VCL,RHOA,ACTB,MPP7,DLG1,ACTG1,PKN2,TBCD,APC,CTNNB1,STRN,PECAM1,RAB13,CDH2	1.74174	0.525835	24	44
CELLULAR RESPONSES TO STRESS%REACTOME%R-HSA-2262752.9	CELLULAR RESPONSES TO STRESS%REACTOME%R-HSA-2262752.9	0.00187216	0.014509	-1	FKBP5,PSME2,RPS6KA1,STAT3,SMARCD3,PSMA4,TXNRD1,RPS15A,CDK6,NUP43,ATP6V1D,PSME1,HMOX2,BLVRA,PRDX6,GCLM,IDH1,GSTP1,RPS13,PSMD14,PTGES3,PSMB6,MIOS,NCF2,PSMA1,PGD,CDK2,RPS18,PSMB3,PSMA7,PSMB4,HIF1AN,RPS9,PSMC2,PRDX1,PSMB7,DNAJA1,PRKCD,PSMA6,CRTC1,TXNRD2,TXN,RPS16,PSMB2,RPS7,PSMA2,TXN2,ACADVL,PSMD7,EGLN1,TALDO1,GSK3A,MAPK14,HSPA1B,PSMB8,EXOSC3,ATP6V1G1,PSMA3,NOTCH1,RPS4X,MAP2K4,MAPKAPK3,PSMD5,RPS17,RP…	-1.35736	-0.288524	169	442
REGULATION OF CELL-SUBSTRATE JUNCTION ASSEMBLY%GOBP%GO:0090109	REGULATION OF CELL-SUBSTRATE JUNCTION ASSEMBLY%GOBP%GO:0090109	0.00187793	0.014509	1	COL16A1,EPHA3,SLC9A1,PTPRA,NRP1,PHLDB2,THY1,CORO1C,TLN1,MAP4K4,DMTN,ROCK1,HRG,DAPK3,LIMS1,VCL,RHOA,FERMT2,PEAK1,ACTG1,PTK2,CLASP1,SLK,MYOC	1.78883	0.548182	24	41
REGULATION OF FOCAL ADHESION ASSEMBLY%GOBP%GO:0051893	REGULATION OF FOCAL ADHESION ASSEMBLY%GOBP%GO:0051893	0.00187793	0.014509	1	COL16A1,EPHA3,SLC9A1,PTPRA,NRP1,PHLDB2,THY1,CORO1C,TLN1,MAP4K4,DMTN,ROCK1,HRG,DAPK3,LIMS1,VCL,RHOA,FERMT2,PEAK1,ACTG1,PTK2,CLASP1,SLK,MYOC	1.78883	0.548182	24	41
MITOCHONDRIAL FATTY ACID BETA-OXIDATION%REACTOME%R-HSA-77289.5	MITOCHONDRIAL FATTY ACID BETA-OXIDATION%REACTOME%R-HSA-77289.5	0.00189274	0.0145955	-1	DBI,HADHA,DECR1,HADHB,ACSF2,THEM4,ACBD6,ACADVL,ACOT2,ECHS1,ACAA2,NDUFAB1,PCCB,HADH,ACOT13	-1.74941	-0.560347	15	30
PPAR SIGNALING PATHWAY%WIKIPATHWAYS_20220510%WP3942%HOMO SAPIENS	PPAR SIGNALING PATHWAY%WIKIPATHWAYS_20220510%WP3942%HOMO SAPIENS	0.00189873	0.0146137	-1	PLTP,DBI,FABP5,PCK2,CPT2,PLIN1,ANGPTL4,FABP4,CPT1A,ME1	-1.76621	-0.575995	10	28
NECTIN ADHESION PATHWAY%PATHWAY INTERACTION DATABASE NCI-NATURE CURATED DATA%NECTIN ADHESION PATHWAY	NECTIN ADHESION PATHWAY%PATHWAY INTERACTION DATABASE NCI-NATURE CURATED DATA%NECTIN ADHESION PATHWAY	0.00193311	0.01485	1	ITGB3,FARP2,PDGFRB,ITGAV,RAP1B,TLN1,PIP5K1C,RAPGEF1,VAV2,PTPRM,PTK2,IQGAP1	1.80574	0.637139	12	22
REGULATION OF PHOSPHORYLATION%GOBP%GO:0042325	REGULATION OF PHOSPHORYLATION%GOBP%GO:0042325	0.00193767	0.0148567	1	IGF1R,HEG1,THBS4,TGFB2,DMD,EPHB4,ROR1,FYN,TGFB1,RAP2B,IGFBP3,INHBE,PKD2,PIK3IP1,SLC9A3R1,ITGB3,TPD52L1,EMILIN1,CAV1,HBEGF,SRPX2,ATP2B4,EPHA3,PRKAG1,IGF2,PIBF1,DLG3,ADAM17,RARRES2,SNCA,TAOK3,DOCK7,PRKAA2,TMEM119,NRP1,MTOR,PDGFRB,SMCR8,THY1,BAD,RPTOR,ENPP1,CACUL1,MYADM,CD74,CORO1C,INSR,SLC4A4,ACE,RELN,DMTN,CBL,HLA-DRB1,ROCK1,NPTN,CD44,HRG,ZBTB20,PLXNB2,FMR1,FLOT1,TGFB3,RB1CC1,GNAQ,HGS,TLR3,RALBP1,P…	1.3999	0.313155	122	369
REGULATION OF CELL DEVELOPMENT%GOBP%GO:0060284	REGULATION OF CELL DEVELOPMENT%GOBP%GO:0060284	0.00194381	0.0148755	1	TGM2,RTN4,SEMA3D,TGFB1,PLXNA1,NOTCH2,DBNL,FLNA,SEMA5B,DOCK7,NRP1,DBN1,CAMK2B,SS18L1,THY1,BAD,PTN,GOLGA4,MAP2,SERPINE2,SEMA3C,MYADM,CORO1C,RELN,ACTN4,DMTN,ROCK1,NPTN,PLXNB2,LIMS1,VCL,MME,PLXNA2,TRIOBP,PPP1R12A,FERMT2,GBP1,PRKDC,ILK,DOCK5,DICER1,YWHAH,DOCK1,MYOC,CUL7,FBN1,BIN1,FGG,DIP2B,NF1,FGB,KDM1A	1.5672	0.391166	52	136
AEROBIC ELECTRON TRANSPORT CHAIN%GOBP%GO:0019646	AEROBIC ELECTRON TRANSPORT CHAIN%GOBP%GO:0019646	0.00199424	0.0152325	-1	NDUFS7,COX6A2,UQCC3,UQCRH,UQCRB,NDUFA10,NDUFB7,NDUFA6,UQCRQ,NDUFAB1,NDUFV2,NDUFB3,NDUFA5,NDUFA4,UQCR11,NDUFB9,NDUFS3,UQCRC1,UQCR10,MT-ND1,NDUFA9,NDUFS6,NDUFS1,NDUFS8,NDUFS4,NDUFB6,NDUFC2,NDUFS2,NDUFV1,NDUFB8,COX5B,NDUFAF1,COX5A,COX6B1,NDUFB4,NDUFA2,NDUFS5	-1.61633	-0.431437	37	71
EXOCYTOSIS%GOBP%GO:0006887	EXOCYTOSIS%GOBP%GO:0006887	0.00200584	0.0152771	1	ANK1,SYNGR1,STX4,RAB31,CADPS,SNCA,EXOC2,RAB8B,STX3,SNAP23,STX1A,DMTN,RAB11FIP5,S100A13,CPLX1,RAB10,VAMP3,NSF,PIP5K1C,EXOC7,UNC13B,EXOC3,RAB8A,VAMP7,DNAJC5,STX11,MYH9,VPS18,EXOC6B,EXOC5,EXOC4,EXOC1,SDF4,LYN,SNAP29,STX2,VTI1B,SCRN1,RAB13,SYNJ1,STXBP1	1.64801	0.45167	41	74
MITOCHONDRIAL RESPIRATORY CHAIN COMPLEX ASSEMBLY%GOBP%GO:0033108	MITOCHONDRIAL RESPIRATORY CHAIN COMPLEX ASSEMBLY%GOBP%GO:0033108	0.00201252	0.0152771	-1	COX17,NDUFS7,UQCC3,CHCHD7,NDUFA10,NDUFB7,SDHAF3,PET100,NDUFA6,NDUFAB1,NDUFB3,NDUFA5,TMEM223,TMEM126B,LYRM7,BCS1L,ECSIT,NDUFB9,NDUFS3,UQCC2,NDUFA11,MT-ND1,NUBPL,NDUFA9,COA3,NDUFS1,NDUFS8,NDUFS4,NDUFB6,NDUFC2,NDUFS2,NDUFAF5,NDUFB8,NDUFAF1,SDHAF1	-1.61751	-0.423979	35	79
CELL SURFACE INTERACTIONS AT THE VASCULAR WALL%REACTOME DATABASE ID RELEASE 81%202733	CELL SURFACE INTERACTIONS AT THE VASCULAR WALL%REACTOME DATABASE ID RELEASE 81%202733	0.00201318	0.0152771	1	JAM2,SDC2,FYN,TGFB1,ITGB3,CAV1,PF4,ESAM,JAM3,ITGAV,CD74,CD44,ITGB1,GLG1,CEACAM8,PTPN11,INPP5D,ATP1B3,ITGA6,PROS1	1.66098	0.463894	20	67
ELECTRON TRANSPORT CHAIN%GOBP%GO:0022900	ELECTRON TRANSPORT CHAIN%GOBP%GO:0022900	0.00201523	0.0152771	-1	NDUFS7,COX6A2,NDUFA12,UQCC3,UQCRH,FDX1,UQCRB,NDUFA10,NDUFB7,NDUFA6,UQCRQ,GPD2,NDUFAB1,NDUFV2,NDUFB3,NDUFA5,NDUFA4,UQCR11,COA6,NDUFB9,NDUFS3,UQCRC1,UQCR10,POR,MT-ND1,NDUFA9,ETFDH,NDUFS6,NDUFS1,NDUFS8,NDUFS4,NDUFB6,NDUFC2,NDUFS2,ETFB,NDUFV1,NDUFB8,COX5B,NDUFAF1,COX5A,COX6B1,NDUFB4,NDUFA2,NDUFS5	-1.61689	-0.419129	44	84
ANTIGEN PROCESSING-CROSS PRESENTATION%REACTOME DATABASE ID RELEASE 81%1236975	ANTIGEN PROCESSING-CROSS PRESENTATION%REACTOME DATABASE ID RELEASE 81%1236975	0.0020202	0.0152861	-1	PSME2,PSMA4,PSME1,CD14,PSMD14,PSMB6,NCF2,PSMA1,PSMB3,PSMA7,PSMB4,VAMP8,PSMC2,PSMB7,PSMA6,MRC1,PSMB2,PSMA2,PSMD7,PSMB8,PSMA3	-1.6034	-0.417037	21	83
SUPERPATHWAY OF CHOLESTEROL BIOSYNTHESIS%BIOCYC%PWY66-5	SUPERPATHWAY OF CHOLESTEROL BIOSYNTHESIS%BIOCYC%PWY66-5	0.00207039	0.0156365	-1	PMVK,MVD,HMGCR,GGPS1,ACAT1,MVK,FDPS,HMGCS2,IDI1	-1.80041	-0.655249	9	18
MITOTIC METAPHASE AND ANAPHASE%REACTOME DATABASE ID RELEASE 81%2555396	MITOTIC METAPHASE AND ANAPHASE%REACTOME DATABASE ID RELEASE 81%2555396	0.00207852	0.0156393	-1	CLASP2,PSME2,IST1,PSMA4,NUP43,PSME1,PSMD14,PSMB6,CHMP2B,PPP1CC,CHMP2A,PSMA1,PSMB3,PSMA7,PSMB4,PPP2CA,PSMC2,PSMB7,PSMA6,PPP2CB,SIRT2,VPS4A,PSMB2,PSMA2,PSMD7,CHMP7,TUBB2B,PSMB8,PSMA3	-1.49025	-0.35651	29	145
MITOTIC ANAPHASE%REACTOME%R-HSA-68882.2	MITOTIC ANAPHASE%REACTOME%R-HSA-68882.2	0.00207852	0.0156393	-1	CLASP2,PSME2,IST1,PSMA4,NUP43,PSME1,PSMD14,PSMB6,CHMP2B,PPP1CC,CHMP2A,PSMA1,PSMB3,PSMA7,PSMB4,PPP2CA,PSMC2,PSMB7,PSMA6,PPP2CB,SIRT2,VPS4A,PSMB2,PSMA2,PSMD7,CHMP7,TUBB2B,PSMB8,PSMA3	-1.49025	-0.35651	29	145
PLASMA MEMBRANE ESTROGEN RECEPTOR SIGNALING%PATHWAY INTERACTION DATABASE NCI-NATURE CURATED DATA%PLASMA MEMBRANE ESTROGEN RECEPTOR SIGNALING	PLASMA MEMBRANE ESTROGEN RECEPTOR SIGNALING%PATHWAY INTERACTION DATABASE NCI-NATURE CURATED DATA%PLASMA MEMBRANE ESTROGEN RECEPTOR SIGNALING	0.00209644	0.0157188	1	IGF1R,GNAO1,GNA14,HBEGF,GNAI1,GNAI2,GNA11,GNAQ,RHOA,GNA13,NOS3,GRB2,ROCK2,HRAS,STRN	1.76349	0.577843	15	30
ADP METABOLIC PROCESS%GOBP%GO:0046031	ADP METABOLIC PROCESS%GOBP%GO:0046031	0.00209688	0.0157188	-1	ENO3,HK3,GPI,ALDOC,FOXK2,ALDOA,PFKM,PFKFB1,ENO1,LDHA,PGAM2,TPI1	-1.79736	-0.598006	12	26
ORGANOPHOSPHATE METABOLIC PROCESS%GOBP%GO:0019637	ORGANOPHOSPHATE METABOLIC PROCESS%GOBP%GO:0019637	0.0021036	0.0157399	-1	ENO3,PMVK,IMPA2,DBI,ABHD5,HINT1,IDH2,ACACB,MOCS2,HADHA,ITPKB,SAMHD1,GPD1L,HK3,MVD,PRDX6,PTDSS1,NDUFS7,GPI,IDH1,ALDOC,NDUFA12,NAMPT,IMPDH1,FOXK2,CRLS1,OLA1,PGD,PDE2A,NUDT4,LCLAT1,NADSYN1,ACAT1,MVK,PLBD2,ALDOA,ACSF2,FDPS,MYH6,HMGCS2,CKM,PIP4K2C,ACSS2,MDH1,PARK7,GPD1,HSD17B4,PFKM,IDI1,PFAS,PFKFB1,NDUFA10,NDUFB7,ENO1,MFN1,TIGAR,LPCAT4,ADSL,NDUFA6,ACOT2,PGP,NUDT18,PAPSS2,AK1,MOCS3,TALDO1,HSPA1B,PLA2G4…	-1.35729	-0.28946	115	424
P73 TRANSCRIPTION FACTOR NETWORK%PATHWAY INTERACTION DATABASE NCI-NATURE CURATED DATA%P73 TRANSCRIPTION FACTOR NETWORK	P73 TRANSCRIPTION FACTOR NETWORK%PATHWAY INTERACTION DATABASE NCI-NATURE CURATED DATA%P73 TRANSCRIPTION FACTOR NETWORK	0.00211506	0.0157964	-1	IL1RAP,RCHY1,SERPINA1,FASN,CDK6,CDK2,PFDN5,MAPK14,NEDD4L,FOXO3	-1.74867	-0.536508	10	36
POSITIVE REGULATION OF TRANSMEMBRANE TRANSPORT%GOBP%GO:0034764	POSITIVE REGULATION OF TRANSMEMBRANE TRANSPORT%GOBP%GO:0034764	0.00218619	0.0162974	1	DMD,CACNA2D1,PKD2,FXYD1,CAV1,FLNA,TRDN,JPH2,SLC9A1,PPP3CC,SNCA,THY1,INSR,RELN,ACTN4,ITGB1,ANO6,PTPN11,ATP1B3,AKAP9,SORBS1,STIM1,ACE2,NPPA	1.65549	0.455412	24	72
REGULATION OF PROTEIN KINASE B SIGNALING%GOBP%GO:0051896	REGULATION OF PROTEIN KINASE B SIGNALING%GOBP%GO:0051896	0.00220832	0.016432	1	IGF1R,DAG1,RTN4,MUL1,TGFB1,RRAS,SLC9A3R1,HBEGF,IGF2,HIP1,INSR,PDCD6,ITGB1,RICTOR,RCN3,FERMT2,EGFR,PTK2,MYOC	1.7016	0.497008	19	52
REGULATION OF NEUROTRANSMITTER LEVELS%GOBP%GO:0001505	REGULATION OF NEUROTRANSMITTER LEVELS%GOBP%GO:0001505	0.00221935	0.0164836	1	STX4,CASK,ITGB3,SNCA,STX3,RAP1B,SNAP23,HNMT,STX1A,CAMK2A,TOR1A,ITGB1,FMR1,CPLX1,FLOT1,PIP5K1C,UNC13B,SLC32A1,DNAJC5,STX11	1.6853	0.497986	20	49
ORGANELLE LOCALIZATION BY MEMBRANE TETHERING%GOBP%GO:0140056	ORGANELLE LOCALIZATION BY MEMBRANE TETHERING%GOBP%GO:0140056	0.00222965	0.0165298	1	STX4,CAV2,EXOC2,RAB8B,STX3,STX16,STX1A,RAB10,VAMP3,EXOC7,UNC13B,EXOC3,RAB8A,STX12,STX7,STX11,STX10,PDZD8,VPS18,EXOC6B,EXOC5,EXOC4,EXOC1,SNAP29,STX2,PACS2,VTI1B,RAB13,STXBP1	1.6888	0.504419	29	47
ACUTE VIRAL MYOCARDITIS%WIKIPATHWAYS_20220510%WP4298%HOMO SAPIENS	ACUTE VIRAL MYOCARDITIS%WIKIPATHWAYS_20220510%WP4298%HOMO SAPIENS	0.00226715	0.0167769	1	CD55,DAG1,SGCG,SGCB,DMD,FYN,TGFB1,SGCD,SGCA	1.74531	0.554394	9	35
ION HOMEOSTASIS%REACTOME DATABASE ID RELEASE 81%5578775	ION HOMEOSTASIS%REACTOME DATABASE ID RELEASE 81%5578775	0.0022723	0.0167842	1	ATP2A3,FXYD1,CAMK2G,ITPR1,ATP2B4,TRDN,CAMK2B,PLN,CAMK2A,ATP2B1,ATP1B3,ASPH,ORAI1,ATP1A3,STIM1,ITPR3	1.75768	0.561303	16	34
CELL-SUBSTRATE JUNCTION ASSEMBLY%GOBP%GO:0007044	CELL-SUBSTRATE JUNCTION ASSEMBLY%GOBP%GO:0007044	0.00231974	0.0171033	1	ACTN1,ITGB4,CTTN,DST,CDH11,THY1,ITGA6,SORBS1,FERMT2,PEAK1,PLEC,TAOK2,LAMC1	1.78255	0.628957	13	22
REGULATION OF CELL-MATRIX ADHESION%GOBP%GO:0001952	REGULATION OF CELL-MATRIX ADHESION%GOBP%GO:0001952	0.00237443	0.0174746	1	COL16A1,CASK,RIN2,RRAS,UTRN,EPHA3,SLC9A1,PTPRA,NRP1,PHLDB2,THY1,CORO1C,TLN1,MAP4K4,DMTN,ROCK1,HRG,DAPK3,LIMS1,VCL,RHOA,FERMT2,PEAK1,ACTG1,PTK2,CLASP1,SLK,MYOC	1.68234	0.479929	28	59
VESICLE FUSION%GOBP%GO:0006906	VESICLE FUSION%GOBP%GO:0006906	0.00238139	0.0174939	1	STX4,BET1,YIPF4,RAB34,DYSF,SNCA,CAV2,RAB8B,VTI1A,YIPF5,STX3,SNAP23,STX16,STX1A,TGFBRAP1,SEC22B,VAMP3,PLEKHM1,VPS41,EEA1,RAB8A,STX12,STX7,VAMP7,STX11,STX10,CHMP5,VPS18	1.65371	0.465716	28	64
ESTABLISHMENT OF ORGANELLE LOCALIZATION%GOBP%GO:0051656	ESTABLISHMENT OF ORGANELLE LOCALIZATION%GOBP%GO:0051656	0.00241838	0.0177333	1	FBXW11,MYO1D,EML4,BICD1,SLC9A3R1,CENPC,KIF13A,SPIRE1,PIBF1,CENPA,LMNB1,EXOC2,DOCK7,MAP4,MARK1,TRAPPC3,NDE1,SNAP23,PEF1,ACTN4,GJA1,MYO1C,PDCD6,S100A13,TOR1A,LLGL1,ITGB1,CUL3,STK25,KIFAP3,SPG11,TRIP11,DYNC1H1,EXOC7,EXOC3,KIF3B,SEH1L,KPNB1,DLG1,RAB6A,LMNA,TBC1D23,AP3B1,DNM2,CLASP1,EML3,PREB,TRAPPC9,PICALM,CHMP5,BLOC1S5,WASL,EXOC6B,MYO6,EXOC5,AP3D1,NMD3,EXOC4,HTT,EXOC1,RAB1A,INPPL1,PEX14,MYO1B	1.48825	0.358882	64	178
REGULATION OF ACTIN CYTOSKELETON ORGANIZATION%GOBP%GO:0032956	REGULATION OF ACTIN CYTOSKELETON ORGANIZATION%GOBP%GO:0032956	0.00242803	0.0177717	1	SYNPO2L,TJP1,CTTN,NOTCH2,DBNL,SVIL,EPHA3,FCHSD2,SLC9A1,ESAM,CYFIP1,NRP1,MTOR,PHLDB2,DBN1,PDGFRB,AKAP13,MYADM,FSCN1,ARHGAP35,TAOK1,LIMA1,DMTN,ROCK1,GSN,PXN,HRG,CDC42EP1,TGFB3,LMOD2,STMN1,DAPK3,SSH3,CORO1B,SYNPO,RICTOR,RHOA,SORBS3,TRIOBP,PPFIA1,ARAP1,FERMT2,NCK1,NCKAP1,ACTG1,SYNPO2,RHOG,NCK2,CLASP1,TAOK2,MYOC,BIN1,CXCL12,FER,ARF6,IQGAP1,VASP,CDC42EP3,INPPL1,LMOD1	1.48248	0.359589	60	169
MESENCHYMAL CELL DIFFERENTIATION%GOBP%GO:0048762	MESENCHYMAL CELL DIFFERENTIATION%GOBP%GO:0048762	0.00244131	0.0178366	1	TGFB2,SEMA3D,TGFB1,SEMA5B,NRP1,LOXL2,SEMA3C,CORO1C,PHOX2B,PEF1,ROCK1,PDCD6,ANXA6,LIMS1,NOLC1,POLR1B,LOXL3	1.74151	0.533679	17	41
POSITIVE REGULATION OF PROTEIN SECRETION%GOBP%GO:0050714	POSITIVE REGULATION OF PROTEIN SECRETION%GOBP%GO:0050714	0.0024519	0.0178572	1	C1QTNF3,TGFB2,ANO1,STX4,MYH10,TGFB1,MCU,TRPM4,GLUD1,ANKRD1,BAD,HLA-DRB1,PTPN23,TGFB3,MYO18A,UNC13B,APBB1,ACSL4,TTN,FGG,ARF6,EXOC1,FGB,ANG	1.73582	0.530054	24	42
ORGANONITROGEN COMPOUND CATABOLIC PROCESS%GOBP%GO:1901565	ORGANONITROGEN COMPOUND CATABOLIC PROCESS%GOBP%GO:1901565	0.00245298	0.0178572	-1	PM20D2,RCHY1,GLUD2,HINT1,DERL1,PSMA4,PCNP,UBE2G1,ASB2,HMOX2,CTSC,ALDH7A1,SAMHD1,LYPLA2,NEDD8,BLVRA,ZER1,ALDH6A1,LRSAM1,ADRM1,SHMT1,PSMD14,PSMB6,CHMP2B,AASDHPPT,LNX1,CHMP2A,UBE2K,PSMA1,PSMB3,PDE2A,MANBA,NUDT4,PSMA7,ACAT1,PSMB4,NPEPPS,VPS25,GLUL,FUCA1,PSMC2,PSMB7,SHARPIN,PSMA6,BCKDHB,UBXN2B,MIB1,SIRT2,NUB1,VPS4A,SNF8,GBA,MCCC2,PSMB2,MPST,PSMA2,TST,PSMD7,LYPLA1,GOT1,NUDT18,AMN1,CHMP7,DENND3,UBE2D4,G…	-1.34691	-0.284585	122	478
POSITIVE REGULATION OF ENDOTHELIAL CELL PROLIFERATION%GOBP%GO:0001938	POSITIVE REGULATION OF ENDOTHELIAL CELL PROLIFERATION%GOBP%GO:0001938	0.00247054	0.0179259	1	THBS4,EGFL7,TNFSF12,ITGB3,IGF2,ADAM17,NRP1,ECM1,PDCD6	1.77571	0.59076	9	28
REGULATION OF CELL GROWTH%GOBP%GO:0001558	REGULATION OF CELL GROWTH%GOBP%GO:0001558	0.00247132	0.0179259	1	RTN4,TGFB2,DACT3,MUL1,CTTN,SEMA3D,DCBLD2,TGFB1,DBNL,CDA,SEMA5B,ADAM17,LTBP4,NRP1,MTOR,DBN1,RPTOR,GOLGA4,MAP2,ENPP1,SEMA3C,GJA1,CDKN2AIP,HRG,RAB33B,RICTOR,APOE,DCUN1D3,ATAD3A,CSNK2A1,EGFR,FHL1,SUPV3L1,DNM2,TAOK2,SIPA1,CAMK2D,MAPKAP1,ARHGEF11	1.5362	0.384668	39	133
3-PHOSPHOINOSITIDE BIOSYNTHESIS%BIOCYC%PWY-6352	3-PHOSPHOINOSITIDE BIOSYNTHESIS%BIOCYC%PWY-6352	0.00250048	0.0181049	1	SACM1L,CDIPT,PI4KA,PI4K2A,PIK3C2B,PIP5K1C,FIG4,PIK3R4	1.84205	0.692243	8	17
POST-TRANSLATIONAL PROTEIN MODIFICATION%GOBP%GO:0043687	POST-TRANSLATIONAL PROTEIN MODIFICATION%GOBP%GO:0043687	0.00251625	0.0181865	-1	CDK2,PRKCD,ATG16L1,COPS5,HLCS,UBE2M,ATG5,UBE2F,SENP8,UBA3,LCMT1,UCHL3,BAZ1B,RPS6KA5,RBX1,AGTPBP1	-1.7666	-0.587773	16	26
VESICLE-MEDIATED TRANSPORT%REACTOME%R-HSA-5653656.2	VESICLE-MEDIATED TRANSPORT%REACTOME%R-HSA-5653656.2	0.00254615	0.0183696	1	SPTA1,HBB,CD55,ANK1,GOLIM4,BICD1,TJP1,CTTN,STX4,COL4A1,COL4A2,RIN2,RABGAP1,BET1,SH3D19,RAB31,TPD52L1,RAB35,CYTH3,HBEGF,SSC5D,PRKAG1,COL3A1,SPTBN1,EXOC2,PRKAA2,RAB8B,MAN2A2,SEC23IP,HIP1,TRAPPC3,VTI1A,GOLGA4,SEC31A,STAM,DNM1,SNAP23,COG5,COL1A2,STX16,PRKAB2,GJA1,MYO1C,AP4M1,CBL,USE1,COL1A1,AMBP,KLC4,RALGAPB,SORT1,TOR1A,SNX18,TBC1D1,VPS45,SEC24B,RAB33B,GALNT2,RAB10,SEC22B,KIFAP3,VAMP3,HGS,ACTR3,SLC2A…	1.34659	0.296641	133	448
REGULATION OF ACTIN FILAMENT-BASED PROCESS%GOBP%GO:0032970	REGULATION OF ACTIN FILAMENT-BASED PROCESS%GOBP%GO:0032970	0.00256893	0.0185009	1	SYNPO2L,TJP1,CTTN,NOTCH2,DBNL,SVIL,CAV1,TRPM4,EPHA3,FCHSD2,SLC9A1,ESAM,CYFIP1,NRP1,MTOR,PHLDB2,DBN1,PDGFRB,PLN,AKAP13,MYADM,FSCN1,ARHGAP35,TAOK1,LIMA1,DMTN,ROCK1,GSN,PXN,HRG,CDC42EP1,TGFB3,LMOD2,STMN1,DAPK3,SSH3,CORO1B,AKAP9,SYNPO,RICTOR,RHOA,SORBS3,TRIOBP,PPFIA1,ARAP1,FERMT2,DLG1,NCK1,NCKAP1,ACTG1,SYNPO2,RHOG,MYH9,CNN2,NCK2,CLASP1,TAOK2,MYOC,CAMK2D,BIN1,CXCL12,FER,ARF6,IQGAP1,VASP,CDC42EP3,INPPL…	1.47611	0.352156	68	193
RHOG GTPASE CYCLE%REACTOME%R-HSA-9013408.1	RHOG GTPASE CYCLE%REACTOME%R-HSA-9013408.1	0.00257495	0.0185112	1	MCAM,ARHGAP1,STBD1,PLEKHG3,CAV1,CYFIP1,TMPO,KALRN,ARHGAP35,SHMT2,CDC42EP1,ITGB1,VAMP3,VAV2,PGRMC2,MPP7,DOCK5,HSPE1,RHOG,ELMO2,DOCK1,EMD	1.68217	0.485984	22	55
PROTEIN CATABOLIC PROCESS%GOBP%GO:0030163	PROTEIN CATABOLIC PROCESS%GOBP%GO:0030163	0.00258065	0.0185191	-1	RCHY1,DERL1,PSMA4,PCNP,UBE2G1,ASB2,CTSC,LYPLA2,NEDD8,ZER1,LRSAM1,ADRM1,PSMD14,PSMB6,CHMP2B,LNX1,CHMP2A,UBE2K,PSMA1,PSMB3,MANBA,PSMA7,PSMB4,VPS25,PSMC2,PSMB7,SHARPIN,PSMA6,UBXN2B,MIB1,SIRT2,NUB1,VPS4A,SNF8,PSMB2,PSMA2,PSMD7,LYPLA1,AMN1,CHMP7,DENND3,UBE2D4,GSK3A,PSMB8,PSMA3,WDR81,CTSZ,NGLY1,PPT1,NEDD4L,VPS37A,ARRDC1,ELANE,FAF1,UBE2B,FBXL18,CUL4B,PSMC1,CLGN,COPS3,HDAC6,TPP1,SQSTM1,CLN5,ARMC8,ZYG11B,…	-1.36118	-0.297531	95	322
RESPONSE TO TRANSFORMING GROWTH FACTOR BETA%GOBP%GO:0071559	RESPONSE TO TRANSFORMING GROWTH FACTOR BETA%GOBP%GO:0071559	0.00259596	0.0185959	1	TGFB2,TGFB1,CILP,LTBP2,FMOD,CLEC3B,ITGB5,COL3A1,MXRA5,ANKRD1,COL1A2,SMAD2,ROCK1,PXN,ITGB1,TGFB3,TGFBRAP1,LIMS1	1.68909	0.5076	18	45
REGULATION OF DOUBLE-STRAND BREAK REPAIR%GOBP%GO:2000779	REGULATION OF DOUBLE-STRAND BREAK REPAIR%GOBP%GO:2000779	0.0026218	0.0187478	-1	SMARCD3,SMARCE1,UBE2N,DEK,ACTL6A,NUDT16L1,RUVBL1,SMARCB1,UBE2V2,PPP4C,WDR48,DMAP1,TP53BP1,PPP4R2,RUVBL2,OTUB1,TFIP11	-1.6687	-0.475109	17	51
SYNAPTIC VESICLE EXOCYTOSIS%GOBP%GO:0016079	SYNAPTIC VESICLE EXOCYTOSIS%GOBP%GO:0016079	0.00269283	0.0191931	1	STX4,SNCA,STX3,SNAP23,STX1A,CPLX1,PIP5K1C,UNC13B,DNAJC5,STX11,SNAP29,STX2,SYNJ1	1.82583	0.686149	13	17
B CELL ACTIVATION%REACTOME%R-HSA-983705.1	B CELL ACTIVATION%REACTOME%R-HSA-983705.1	0.0026936	0.0191931	-1	PSME2,PSMA4,PSME1,PSMD14,PSMB6,PSMA1,PTPN6,PSMB3,PSMA7,PSMB4,PSMC2,PSMB7,PSMA6,PSMB2,PSMA2,PSMD7,BCL10,PSMB8,PSMA3,PSMD5,SH3KBP1,PSMC1,NRAS	-1.58056	-0.411096	23	83
CXCR4-MEDIATED SIGNALING EVENTS%PATHWAY INTERACTION DATABASE NCI-NATURE CURATED DATA%CXCR4-MEDIATED SIGNALING EVENTS	CXCR4-MEDIATED SIGNALING EVENTS%PATHWAY INTERACTION DATABASE NCI-NATURE CURATED DATA%CXCR4-MEDIATED SIGNALING EVENTS	0.00276243	0.0196142	1	GNAO1,FYN,GNAI1,MTOR,GNAI2,BAD,RAP1B,DNM1,HLA-DRB1,STAT5B,PXN,HGS,PTPN11,INPP5D,RICTOR,RHOA,RALB,GNA13,PTK2,MAPKAP1,CXCL12	1.686	0.490369	21	53
REGULATION OF ACTIN DYNAMICS FOR PHAGOCYTIC CUP FORMATION%REACTOME%R-HSA-2029482.2	REGULATION OF ACTIN DYNAMICS FOR PHAGOCYTIC CUP FORMATION%REACTOME%R-HSA-2029482.2	0.00276243	0.0196142	1	ABI1,WIPF3,CYFIP1,MYO1C,ACTR3,MYO9B,ACTB,ACTR2,VAV2,NCKIPSD,NCK1,NCKAP1,ACTG1,MYH9,PTK2,ELMO2,DOCK1,WIPF2,WASL,ARPC5,MAPK1	1.68064	0.48881	21	53
POSITIVE REGULATION OF PLASMA MEMBRANE BOUNDED CELL PROJECTION ASSEMBLY%GOBP%GO:0120034	POSITIVE REGULATION OF PLASMA MEMBRANE BOUNDED CELL PROJECTION ASSEMBLY%GOBP%GO:0120034	0.00278138	0.0197141	1	DPYSL3,AGRN,CYFIP1,NRP1,FSCN1,ARHGAP35,CDC42EP1,FMR1,TGFB3,PLEKHM1,ACTR3,ACTR2,PALM,ARAP1,NCKAP1,WASL,CDC42EP3,HTT,APC,HRAS	1.68786	0.507231	20	45
BETA3 INTEGRIN CELL SURFACE INTERACTIONS%PATHWAY INTERACTION DATABASE NCI-NATURE CURATED DATA%BETA3 INTEGRIN CELL SURFACE INTERACTIONS	BETA3 INTEGRIN CELL SURFACE INTERACTIONS%PATHWAY INTERACTION DATABASE NCI-NATURE CURATED DATA%BETA3 INTEGRIN CELL SURFACE INTERACTIONS	0.00285117	0.0201733	1	COL4A1,TGFBI,COL4A6,ITGB3,PDGFRB,ITGAV,THY1,COL1A2,COL1A1,LAMA4,COL4A3,LAMC1,FBN1,FGG,FGB,FGA	1.79552	0.60158	16	27
MUSCLE CELL DIFFERENTIATION%GOBP%GO:0042692	MUSCLE CELL DIFFERENTIATION%GOBP%GO:0042692	0.00287615	0.0202839	1	MYOF,JAM2,SYNPO2L,ACTN1,DMD,PGM5,PTGFRN,MYEF2,DYSF,CAV2,MYH11,PDGFRB,ANKRD1,SPEG,CD9,AKAP13,ACTN4,SORT1,CSRP1,ITGB1,LMOD2	1.5592	0.411984	21	92
PID_ER_NONGENOMIC_PATHWAY%MSIGDB_C2%PID_ER_NONGENOMIC_PATHWAY	PID_ER_NONGENOMIC_PATHWAY%MSIGDB_C2%PID_ER_NONGENOMIC_PATHWAY	0.00287687	0.0202839	1	IGF1R,GNAO1,GNA14,HBEGF,GNAI1,GNA11,GNAQ,GNA13,GRB2,ROCK2,HRAS,STRN	1.74788	0.602948	12	24
POSITIVE REGULATION OF FILOPODIUM ASSEMBLY%GOBP%GO:0051491	POSITIVE REGULATION OF FILOPODIUM ASSEMBLY%GOBP%GO:0051491	0.00288517	0.020307	1	DPYSL3,AGRN,NRP1,FSCN1,FMR1,TGFB3,PALM,ARAP1,WASL	1.81051	0.680392	9	17
PTERIDINE-CONTAINING COMPOUND METABOLIC PROCESS%GOBP%GO:0042558	PTERIDINE-CONTAINING COMPOUND METABOLIC PROCESS%GOBP%GO:0042558	0.00291484	0.0204801	-1	PM20D2,MTHFD2,MTHFR,SHMT1,MTHFD2L,AASDHPPT,FPGS,ALDH1L1,QDPR,MTHFS	-1.77184	-0.654985	10	17
CELLULAR RESPONSE TO ORGANONITROGEN COMPOUND%GOBP%GO:0071417	CELLULAR RESPONSE TO ORGANONITROGEN COMPOUND%GOBP%GO:0071417	0.00294372	0.020647	1	IGF1R,TGM2,IGFBP5,GNAO1,FYN,GNA14,CACNA2D1,PKD2,RAB31,CAV1,FLNA,ATP2B4,IGF2,SLC9A1,RARRES2,SNCA,CAV2,MTOR,RPTOR,ENPP1,RAP1B,VIM,GNA11,INSR,GJA1,DMTN,CAMK2A,STAT5B,PXN,GNAS,RAB10,SLC2A4,PSEN1,AKAP9,APP,PTPN2,ACTB,RAPGEF1,SORBS1,RAB8A,ATP1A3,PRKDC	1.47852	0.358025	42	172
MESENCHYME DEVELOPMENT%GOBP%GO:0060485	MESENCHYME DEVELOPMENT%GOBP%GO:0060485	0.00294985	0.0206541	1	TGFB2,SEMA3D,TGFB1,PKD2,SEMA5B,NRP1,LOXL2,SEMA3C,CORO1C,PHOX2B,PEF1,SMAD2,ROCK1,PDCD6,ANXA6,LIMS1,NOLC1,POLR1B,LOXL3,TCOF1,NOS3,ACTA2,CUL7	1.6846	0.496104	23	50
REGULATION OF CYTOSKELETON ORGANIZATION%GOBP%GO:0051493	REGULATION OF CYTOSKELETON ORGANIZATION%GOBP%GO:0051493	0.00299302	0.02092	1	MID1,SYNPO2L,BICD1,TJP1,CTTN,NOTCH2,DBNL,SVIL,EPHA3,FCHSD2,SLC9A1,GNAI1,SNCA,ESAM,CYFIP1,PRKAA2,NRP1,MTOR,PHLDB2,DBN1,PHLDB1,PDGFRB,MAPRE2,MAP2,AKAP13,MYADM,FSCN1,ARHGAP35,TAOK1,LIMA1,DMTN,MECP2,ROCK1,GSN,PXN,HRG,CDC42EP1,NES,TGFB3,LMOD2,STMN1,DAPK3,SSH3,CAMSAP1,CORO1B,AKAP9,SYNPO,RICTOR,RHOA,SORBS3,TRIOBP,DYNC1H1,PPFIA1,MAP1A,ARAP1,FERMT2,NCK1,PRKAA1,NCKAP1,ACTG1,SYNPO2,RHOG,NCK2,PTK2,CLASP1,TAO…	1.45122	0.336929	82	248
RHOB GTPASE CYCLE%REACTOME DATABASE ID RELEASE 81%9013026	RHOB GTPASE CYCLE%REACTOME DATABASE ID RELEASE 81%9013026	0.00301773	0.0210562	1	MCAM,ARHGAP1,CAV1,DAAM1,ARHGEF12,FLOT2,AKAP13,SNAP23,ARHGAP35,ROCK1,FLOT1,VAMP3,MYO9B,VAV2,SLK,ARHGEF2,PKN2,ARHGEF11	1.70098	0.519417	18	42
REGULATION OF SYNAPTIC PLASTICITY%GOBP%GO:0048167	REGULATION OF SYNAPTIC PLASTICITY%GOBP%GO:0048167	0.00302457	0.0210675	1	SYNGR1,STX4,DBN1,CAMK2B,PTN,ERC1,ACE,RELN,NPTN,CAMK2A,FMR1,APP,APOE,MAP1A,NCDN,YWHAH	1.70748	0.53244	16	38
LIPID OXIDATION%GOBP%GO:0034440	LIPID OXIDATION%GOBP%GO:0034440	0.00303688	0.0210804	-1	HADHA,DECR1,HADHB,CPT2,ACAT1,ADH5,HSD17B4,ACADVL,ECHS1,ACAA2,GCDH,ECI2,ACOT8,ADIPOQ,SCP2,ACAT2,HADH,AUH	-1.6647	-0.480462	18	48
FATTY ACID OXIDATION%GOBP%GO:0019395	FATTY ACID OXIDATION%GOBP%GO:0019395	0.00303688	0.0210804	-1	HADHA,DECR1,HADHB,CPT2,ACAT1,ADH5,HSD17B4,ACADVL,ECHS1,ACAA2,GCDH,ECI2,ACOT8,ADIPOQ,SCP2,ACAT2,HADH,AUH	-1.6647	-0.480462	18	48
ERBB SIGNALING PATHWAY%GOBP%GO:0038127	ERBB SIGNALING PATHWAY%GOBP%GO:0038127	0.00306279	0.0212114	1	TGFB1,HBEGF,ADAM17,CBL,PTPN11,EFEMP1,REPS2,EGFR,NCK2,PTK2,MYOC,PLCG1,IQGAP1,MAPK1,GRB2	1.74802	0.578203	15	29
VESICLE-MEDIATED TRANSPORT TO THE PLASMA MEMBRANE%GOBP%GO:0098876	VESICLE-MEDIATED TRANSPORT TO THE PLASMA MEMBRANE%GOBP%GO:0098876	0.00307081	0.0212114	1	RAB31,RAB35,KIF13A,RAB34,SPTBN1,EXOC2,RAB8B,VTI1A,GOLGA4,STX3,STX16,GOLGA7,EHD3,LLGL1,PTPN23,ARFGEF2,RAB10,HGS,SCRIB,NSF,RABEP1,VPS52,RAB14,RAB8A,STX12,LMTK2,CCDC93,EXOC6B,EXOC5,ARF6,EXOC4,EXOC1	1.59421	0.42691	32	84
GLYCOLYSIS%REACTOME%R-HSA-70171.6	GLYCOLYSIS%REACTOME%R-HSA-70171.6	0.00307152	0.0212114	-1	ENO3,NUP43,HK3,GPI,ALDOC,ALDOA,PPP2CA,PPP2CB,PFKM,PFKFB1,ENO1,PGP,PGAM2,NUP155,TPI1	-1.62124	-0.45333	15	56
REGULATION OF WOUND HEALING%GOBP%GO:0061041	REGULATION OF WOUND HEALING%GOBP%GO:0061041	0.00310957	0.0214374	1	CASK,EMILIN1,CAV1,HBEGF,KLKB1,F11,FAP,MTOR,PHLDB2,CD9,SERPINE2,DMTN,HRG,MYLK,ITGB1,MMRN1,ANO6,APOE,PLAT,FERMT2,APCS,ACTG1,NOS3,PTK2,CLASP1	1.68071	0.480721	25	58
HDR THROUGH HOMOLOGOUS RECOMBINATION (HRR) OR SINGLE STRAND ANNEALING (SSA)%REACTOME%R-HSA-5693567.2	HDR THROUGH HOMOLOGOUS RECOMBINATION (HRR) OR SINGLE STRAND ANNEALING (SSA)%REACTOME%R-HSA-5693567.2	0.00313414	0.02157	-1	UBE2N,CDK2,ERCC1,UBE2V2,PPP4C,SUMO2,TP53BP1,PPP4R2	-1.75496	-0.589117	8	25
POSITIVE REGULATION OF PEPTIDYL-TYROSINE PHOSPHORYLATION%GOBP%GO:0050731	POSITIVE REGULATION OF PEPTIDYL-TYROSINE PHOSPHORYLATION%GOBP%GO:0050731	0.00319249	0.0219341	1	THBS4,TGFB1,ITGB3,HBEGF,IGF2,PIBF1,DLG3,ADAM17,NRP1,CD74,ACE,RELN,CD44,PTPN11,CD81,ARHGEF2,SRCIN1,PLCG2,GPRC5B,CSPG4,DOK7,LYN	1.70189	0.521538	22	41
CELL JUNCTION ORGANIZATION%REACTOME%R-HSA-446728.2	CELL JUNCTION ORGANIZATION%REACTOME%R-HSA-446728.2	0.0032197	0.0220834	1	ACTN1,ITGB4,FLNA,DST,CDH11,LAMA3,PXN,ITGB1,LIMS1,ITGA6,FERMT2,PLEC,ILK,PARVB,CADM1,VASP,ANG,RSU1,CTNNB1,CDH2,FLNC	1.69606	0.532785	21	37
G-PROTEIN MEDIATED EVENTS%REACTOME DATABASE ID RELEASE 81%112040	G-PROTEIN MEDIATED EVENTS%REACTOME DATABASE ID RELEASE 81%112040	0.00322887	0.0221087	1	PLCB4,GNA14,CAMK2G,ITPR1,GNAI1,PDE1C,GNAI2,CAMK2B,ADCY9,GNA11,CAMK2A,GNAQ	1.71589	0.554478	12	32
POSITIVE REGULATION OF CELL JUNCTION ASSEMBLY%GOBP%GO:1901890	POSITIVE REGULATION OF CELL JUNCTION ASSEMBLY%GOBP%GO:1901890	0.0032617	0.022275	1	COL16A1,AGRN,CAV1,SRPX2,NRP1,THY1,MAP4K4,ROCK1,HRG,FLOT1,LIMS1,FERMT2,ACE2,MYOC	1.75058	0.609833	14	23
ARF6 SIGNALING EVENTS%PATHWAY INTERACTION DATABASE NCI-NATURE CURATED DATA%ARF6 SIGNALING EVENTS	ARF6 SIGNALING EVENTS%PATHWAY INTERACTION DATABASE NCI-NATURE CURATED DATA%ARF6 SIGNALING EVENTS	0.00326421	0.022275	1	GNA14,ITGB3,CYTH3,GNA11,PXN,GNAQ,NCK1,IQSEC1,ARRB1,EGFR,ARF6,KIF13B	1.8126	0.691817	12	16
MODIFICATION-DEPENDENT MACROMOLECULE CATABOLIC PROCESS%GOBP%GO:0043632	MODIFICATION-DEPENDENT MACROMOLECULE CATABOLIC PROCESS%GOBP%GO:0043632	0.00328615	0.0223869	-1	RCHY1,DERL1,PSMA4,PCNP,UBE2G1,ASB2,NEDD8,ADRM1,PSMD14,PSMB6,CHMP2B,LNX1,CHMP2A,UBE2K,PSMA1,PSMB3,PSMA7,PSMB4,VPS25,PSMC2,PSMB7,SHARPIN,PSMA6,UBXN2B,MIB1,SIRT2,NUB1,VPS4A,SNF8,PSMB2,PSMA2,PSMD7,AMN1,CHMP7,UBE2D4,GSK3A,EXOSC3,PSMA3,WDR81,NEDD4L,VPS37A,ARRDC1,FAF1,UBE2B,FBXL18,CUL4B,PSMC1,CLGN,COPS3,SQSTM1,ARMC8,NEDD4,DIS3L2,CUL2,UBR3,VPS36,CALR,RBCK1,UBXN1,WDR26,RNF20,DCAF11,PPP2R5C,EXOSC9,ATE1,RNF…	-1.37958	-0.30879	81	261
REGULATION OF CELL SIZE%GOBP%GO:0008361	REGULATION OF CELL SIZE%GOBP%GO:0008361	0.00330639	0.0224363	1	RTN4,CTTN,SEMA3D,SLC9A3R1,DBNL,SEMA5B,NRP1,MTOR,DBN1,RPTOR,GOLGA4,MAP2,SEMA3C,ARHGAP35,SLC12A7,ANO6,RHOA,APOE,SLC12A4,VAV2	1.66612	0.479823	20	56
RHOC GTPASE CYCLE%REACTOME%R-HSA-9013106.1	RHOC GTPASE CYCLE%REACTOME%R-HSA-9013106.1	0.00331248	0.0224363	1	MCAM,ARHGAP1,FMNL3,CAV1,DAAM1,ARHGEF12,TMPO,FLOT2,AKAP13,ARHGAP35,ROCK1,FLOT1,VAMP3,MYO9B,ARHGEF40,RHOA,VAV2,SLK,PKN2,ARHGEF11,IQGAP1,ACBD5	1.67106	0.488087	22	52
REGULATION OF CALCIUM ION TRANSMEMBRANE TRANSPORT%GOBP%GO:1903169	REGULATION OF CALCIUM ION TRANSMEMBRANE TRANSPORT%GOBP%GO:1903169	0.00331492	0.0224363	1	DMD,FYN,CACNA2D1,PKD2,CAV1,TRDN,JPH2,SLC9A1,PPP3CC,SNCA,THY1,PLN,FMR1,AHNAK,VDAC1,STIM1,NPPA,CAMK2D,PLCG1,HRC,BIN1,HTT,ATP1A2	1.65748	0.482073	23	53
RESPONSE TO ORGANONITROGEN COMPOUND%GOBP%GO:0010243	RESPONSE TO ORGANONITROGEN COMPOUND%GOBP%GO:0010243	0.00331565	0.0224363	1	IGF1R,TGM2,IGFBP5,GNAO1,FYN,GNA14,CACNA2D1,PKD2,RAB31,CAV1,FLNA,ATP2B4,CANX,IGF2,SLC9A1,GNAI1,RARRES2,SNCA,CAV2,MTOR,NT5E,CD9,RPTOR,ENPP1,RAP1B,VIM,GNA11,INSR,GJA1,DMTN,ROCK1,CAMK2A,SORT1,STAT5B,TOR1A,PXN,GNAS,ITGB1,SLC2A1,FAF2,RAB10,SLC2A4,EIF2B5,PSEN1,AKAP9,APP,PTPN2,STAT4,ACTB,RAPGEF1,RCN3,ATXN3,SORBS1,BAG6,RAB8A,ATP1A3,PRKDC,ERLIN2,ERLIN1,TYK2,LPIN3,CD81,MAN1B1,PTK2,ARHGEF2,SEL1L,GABPA	1.43019	0.330651	67	257
MRNA PROCESSING%WIKIPATHWAYS_20220510%WP411%HOMO SAPIENS	MRNA PROCESSING%WIKIPATHWAYS_20220510%WP411%HOMO SAPIENS	0.003367	0.0227456	-1	CD2BP2,SNRPG,PAPOLA,CSTF1,SNRPB2,NCBP2,CDC40,SNRPD3,SNRPA1,CELF2,SNRPF,TXNL4A,NUDT21,DHX15,SF3A2,PRPF40A,LSM2,PRPF4B,LSM7,SNRPE,HNRNPAB,NHP2L1,SRSF10,DNAJC8,DHX38,SNRPN,PABPN1,SNRPA,SREK1,NCBP1,PPM1G,SRSF6,POLR2A,RBM5	-1.56512	-0.40854	34	81
TRNA MODIFICATION%GOBP%GO:0006400	TRNA MODIFICATION%GOBP%GO:0006400	0.00341443	0.0230274	-1	TRMU,TRMT6,TRMT1,WDR6,TPRKB,TRMT112,ELP4,YRDC,MOCS3,TRMT61B,SSB,METTL2A,ELP6,THUMPD3,C9ORF64,NSUN6,OSGEP,ELP2	-1.68969	-0.508435	18	39
RIBOSOME ASSEMBLY%GOBP%GO:0042255	RIBOSOME ASSEMBLY%GOBP%GO:0042255	0.00342539	0.0230628	-1	EIF2A,BRIX1,C1QBP,MDN1,NOP2,RRS1,RPS27,RPSA,DDX3X,RPS15,DHX29,XRCC5,RPS5,RPLP0,RPS19,NGRN,FASTKD2,EIF6,ERAL1,DDX28,MRPS2,NPM1,RPL5,RPS28,NLE1,MRPL20,RPL11,RPL6	-1.6958	-0.508188	28	40
POSITIVE REGULATION OF SMALL GTPASE MEDIATED SIGNAL TRANSDUCTION%GOBP%GO:0051057	POSITIVE REGULATION OF SMALL GTPASE MEDIATED SIGNAL TRANSDUCTION%GOBP%GO:0051057	0.00345688	0.023236	1	SYNPO2L,TGM2,NOTCH2,COL3A1,ITGAV,MAPRE2,AKAP13,RELN,MAP4K4	1.77781	0.639872	9	20
RIBOSOME BIOGENESIS%GOBP%GO:0042254	RIBOSOME BIOGENESIS%GOBP%GO:0042254	0.00348513	0.0233869	-1	PIN4,PIH1D1,EIF2A,NOL9,WDR36,GLUL,DDX47,BRIX1,UTP15,TRMT112,NIP7,RPS16,RPS7,METTL5,TFB1M,C1QBP,ZNF622,EXOSC3,MDN1,RPS17,NOP2,XRN2,CUL4B,ABCE1,MRTO4,TSR2,RPS24,RRS1,BMS1,RPS27,UTP6,RPSA,EXOSC9,GTPBP4,RPS21,DDX3X,FBL,RPS15,EXOSC7,DDX49,DHX29,EXOSC10,XRCC5,RPS5,DDX18,RPLP0,ERI3,RPS19,RRP9,NGRN,FASTKD2,EIF6,WDR12,ERAL1,DDX28,NIFK,MRPS2,NPM1,NOL6,RPL5,RPS28,HEATR1,TFB2M,NOL11,NLE1,TSR3,GRWD1,NOP9,MRPL…	-1.46979	-0.350569	81	149
VESICLE LOCALIZATION%GOBP%GO:0051648	VESICLE LOCALIZATION%GOBP%GO:0051648	0.00359583	0.0240897	1	FBXW11,MYO1D,KIF13A,EXOC2,TRAPPC3,NDE1,SNAP23,PEF1,ACTN4,MYO1C,PDCD6,TOR1A,CUL3,KIFAP3,SPG11,TRIP11,DYNC1H1,EXOC7,EXOC3,KIF3B,TBC1D23,AP3B1,DNM2,CLASP1,PREB,TRAPPC9,PICALM,BLOC1S5,WASL,EXOC6B,MYO6,EXOC5,AP3D1,VPS33A,EXOC4,HTT,EXOC1,RAB1A,MYO1B	1.55406	0.411579	39	90
POSITIVE REGULATION OF PROTEIN PHOSPHORYLATION%GOBP%GO:0001934	POSITIVE REGULATION OF PROTEIN PHOSPHORYLATION%GOBP%GO:0001934	0.00360825	0.0241328	1	THBS4,TGFB2,TGFB1,INHBE,PKD2,ITGB3,TPD52L1,CAV1,HBEGF,ATP2B4,PRKAG1,IGF2,PIBF1,DLG3,ADAM17,RARRES2,SNCA,TAOK3,DOCK7,TMEM119,NRP1,MTOR,PDGFRB,RPTOR,CACUL1,CD74,INSR,ACE,RELN,HLA-DRB1,NPTN,CD44,FMR1,FLOT1,TGFB3,RB1CC1,TLR3,RALBP1,PTPN11,AKAP9,CCND2,APP,RHOA,DAB2IP,RALB,GPNMB,FERMT2,ILK,ARRB1,PRKD2,FXR1,TBK1,EGFR,FGF1,CD81,RAF1,PTK2,TAOK2,ARHGEF2,FLT1,SRCIN1,DDRGK1,HDAC3,PLCG2,IQGAP1,CLU,MOB1A,MAPK1…	1.45871	0.348354	74	192
PROTEIN LOCALIZATION TO CELL JUNCTION%GOBP%GO:1902414	PROTEIN LOCALIZATION TO CELL JUNCTION%GOBP%GO:1902414	0.00362112	0.0241787	1	HEG1,TJP1,JAM3,STX3,SCRIB,ACTB,MAP1A,FERMT2,RAB8A,MPP7,DLG1,ACTG1	1.71825	0.563017	12	30
EPIDERMAL GROWTH FACTOR RECEPTOR SIGNALING PATHWAY%GOBP%GO:0007173	EPIDERMAL GROWTH FACTOR RECEPTOR SIGNALING PATHWAY%GOBP%GO:0007173	0.00364543	0.0243009	1	TGFB1,HBEGF,ADAM17,CBL,PTPN11,EFEMP1,REPS2,EGFR,NCK2,PTK2,PLCG1,IQGAP1,GRB2	1.72849	0.602137	13	23
CARBOHYDRATE DERIVATIVE METABOLIC PROCESS%GOBP%GO:1901135	CARBOHYDRATE DERIVATIVE METABOLIC PROCESS%GOBP%GO:1901135	0.00366396	0.0243408	-1	ENO3,PMVK,GOLPH3,HINT1,NANS,MAN2B1,ACACB,SAMHD1,HK3,MVD,NDUFS7,GPI,ALDOC,ABCC5,NDUFA12,CPTP,IMPDH1,FOXK2,OLA1,PGD,PDE2A,MANBA,NUDT4,ACAT1,MVK,ALDOA,ACSF2,FUCA1,MYH6,UAP1,HMGCS2,ACSS2,PARK7,GPD1,HSD17B4,PFKM,PFAS,PFKFB1,NDUFA10,GBA,NDUFB7,CHPF,ENO1,MFN1,TIGAR,ADSL,NDUFA6,ACOT2,CHST7,NUDT18,PAPSS2,TYMP,TALDO1,HSPA1B,GPD2,LDHA,GCDH,PGAM2,NGLY1,PPT1,NDUFAB1,CMPK2,GALT,PIGO,NAGK,NDUFV2,NDUFB3,ACOT8,GM…	-1.33236	-0.286425	103	386
RAC3 GTPASE CYCLE%REACTOME DATABASE ID RELEASE 81%9013423	RAC3 GTPASE CYCLE%REACTOME DATABASE ID RELEASE 81%9013423	0.0036785	0.0243408	1	MCAM,ARHGAP1,STBD1,ABI1,CAV1,TAOK3,CYFIP1,TMPO,SNAP23,ARHGAP35,CDC42EP1,ITGB1,VAMP3,SWAP70,RAPGEF1,VAV2,PGRMC2,FERMT2,MPP7	1.65828	0.479083	19	55
LIPID METABOLIC PROCESS%GOBP%GO:0006629	LIPID METABOLIC PROCESS%GOBP%GO:0006629	0.00368034	0.0243408	-1	PMVK,RETSAT,DBI,ABHD5,FASN,FABP5,PCK2,ACACB,HADHA,ITPKB,DECR1,LYPLA2,ACSS3,PITPNB,MVD,PRDX6,PTDSS1,HADHB,GSTP1,PTGES3,CPT2,HMGCR,CPTP,SCARF1,CRLS1,PLIN1,OSBPL1A,GGPS1,LCLAT1,BDH1,ACAT1,MVK,PLBD2,ACSF2,FDPS,FDX1,FUCA1,ADH5,PPP2CA,RBP1,BCO2,HMGCS2,GSTM2,THEM4,PIP4K2C,ACSS2,HSD17B4,SIRT2,AKR1D1,PTGR1,IDI1,GBA,ACADVL,NCEH1,LPCAT4,PAFAH1B2,ACOT2,GSTM4,PGP,ADH1B,ECHS1,PLA2G4C,ACAA2,GCDH,ECI2,PNPLA2,PPT…	-1.3165	-0.281367	117	413
REGULATION OF DEVELOPMENTAL GROWTH%GOBP%GO:0048638	REGULATION OF DEVELOPMENTAL GROWTH%GOBP%GO:0048638	0.00368664	0.0243408	1	RTN4,CTTN,SEMA3D,AGRN,DBNL,SEMA5B,NRP1,DBN1,MYCBP2,GOLGA4,MAP2,SEMA3C,INSR,STAT5B,APP,APOE	1.66463	0.488341	16	51
POSITIVE REGULATION OF CELL DIFFERENTIATION%GOBP%GO:0045597	POSITIVE REGULATION OF CELL DIFFERENTIATION%GOBP%GO:0045597	0.00368694	0.0243408	1	TGM2,TGFB2,LAMB2,CD46,TCF4,RIN2,TGFB1,PLXNA1,RRAS,IGFBP3,DBNL,GLIPR2,TRPM4,FLNA,PF4,RARRES2,TMEM119,NRP1,MTOR,DBN1,CAMK2B,LOXL2,SS18L1,LAMA2,BAD,PTN,GOLGA4,LTBP3,SERPINE2,MYADM,CD74,PIEZO1,SMAD2,RELN,GJA1,DMTN,HLA-DRB1,COL1A1,NPTN,STAT5B,PLXNB2,TGFB3,FBN2,PROM1,LIMS1,NID1,INPP5D,NPNT,FAM210B,MME,RHOA,PLXNA2,TRIOBP,ACTB,FERMT2,PRKDC,ILK,ACIN1,DOCK5,RBM24,DICER1,PTK2,ARHGEF2,DOCK1,MYOC,CUL7,LAMC1,B…	1.42626	0.332631	80	240
TRANSLATIONAL INITIATION%GOBP%GO:0006413	TRANSLATIONAL INITIATION%GOBP%GO:0006413	0.00368764	0.0243408	-1	EIF4E,EIF5,EIF4A1,NCBP2,EIF3I,RPS17,EIF3F,EIF4A2,EIF3M,EIF2S3,RPS3,ABCE1,EIF3J,MTIF3,DENR,EIF4B,DDX3X,DHX29,RPS5,MCTS1,EIF2S2,NCBP1,EIF3D,EIF2B3	-1.62782	-0.469819	24	48
PID_CXCR4_PATHWAY%MSIGDB_C2%PID_CXCR4_PATHWAY	PID_CXCR4_PATHWAY%MSIGDB_C2%PID_CXCR4_PATHWAY	0.0037092	0.0244431	1	GNAO1,FYN,ITGA1,GNAI1,MTOR,ITGAV,BAD,STAT5B,PXN,ITGB1,ITGA7,HGS,PTPN11,RICTOR,RALB,ITGA6,GNA13,MAPKAP1,CXCL12	1.65323	0.490614	19	48
REGULATION OF CELLULAR COMPONENT SIZE%GOBP%GO:0032535	REGULATION OF CELLULAR COMPONENT SIZE%GOBP%GO:0032535	0.00372605	0.0245141	1	RTN4,CTTN,SEMA3D,SLC9A3R1,DBNL,SVIL,SEMA5B,FCHSD2,HP1BP3,ESAM,NRP1,MTOR,DBN1,RPTOR,GOLGA4,MAP2,SEMA3C,MYADM,ARHGAP35,LIMA1,SLC12A7,GSN,CDC42EP1,LMOD2,SSH3,ANO6,RHOA,APOE,TRIOBP,SLC12A4,VAV2,NCK1,CLCN6,NCKAP1,DNM2,NCK2,PICALM,BIN1,CXCL12,FER,ARF6,DIP2B,VASP,CDC42EP3,LMOD1	1.52318	0.384355	45	126
REGULATION OF NEUROGENESIS%GOBP%GO:0050767	REGULATION OF NEUROGENESIS%GOBP%GO:0050767	0.00379747	0.0249433	1	TGM2,RTN4,SEMA3D,TGFB1,PLXNA1,DBNL,SEMA5B,DOCK7,NRP1,DBN1,CAMK2B,SS18L1,THY1,PTN,GOLGA4,MAP2,SERPINE2,SEMA3C,RELN,NPTN,PLXNB2,MME,PLXNA2	1.61886	0.437401	23	79
DISORDERS OF TRANSMEMBRANE TRANSPORTERS%REACTOME DATABASE ID RELEASE 81%5619115	DISORDERS OF TRANSMEMBRANE TRANSPORTERS%REACTOME DATABASE ID RELEASE 81%5619115	0.00383487	0.0251231	-1	PSME2,DERL1,PSMA4,NUP43,PSME1,PSMD14,PSMB6,PSMA1,PSMB3,PSMA7,SLC1A3,PSMB4,PSMC2,PSMB7,PSMA6,PSMB2,PSMA2,PSMD7,PSMB8,PSMA3,PSMD5,ABCB6,NUP155,PSMC1	-1.55054	-0.394334	24	95
CELL ADHESION MEDIATED BY INTEGRIN%GOBP%GO:0033627	CELL ADHESION MEDIATED BY INTEGRIN%GOBP%GO:0033627	0.0038373	0.0251231	1	ITGB4,COL16A1,ITGA1,ITGB3,ITGB5,ADAM17,ITGAV,ITGA9,ITGB1,ITGA7,ITGA11,MMRN1,NPNT,ITGA6	1.72428	0.600671	14	23
CELLULAR RESPONSE TO DOPAMINE%GOBP%GO:1903351	CELLULAR RESPONSE TO DOPAMINE%GOBP%GO:1903351	0.00386698	0.0252355	1	TGM2,GNAO1,GNA14,FLNA,GNA11,GNAS	1.78701	0.661481	6	18
RESPONSE TO DOPAMINE%GOBP%GO:1903350	RESPONSE TO DOPAMINE%GOBP%GO:1903350	0.00386698	0.0252355	1	TGM2,GNAO1,GNA14,FLNA,GNA11,GNAS	1.78701	0.661481	6	18
FATTY ACID BETA-OXIDATION%GOBP%GO:0006635	FATTY ACID BETA-OXIDATION%GOBP%GO:0006635	0.00388015	0.0252805	-1	HADHA,DECR1,HADHB,CPT2,ACAT1,HSD17B4,ACADVL,ECHS1,ACAA2,GCDH,ECI2,ACOT8,ADIPOQ,SCP2,ACAT2,HADH,AUH,CRAT,ETFDH,ACOX1,ACADS,ETFB	-1.66917	-0.49026	22	44
REGULATION OF SMALL GTPASE MEDIATED SIGNAL TRANSDUCTION%GOBP%GO:0051056	REGULATION OF SMALL GTPASE MEDIATED SIGNAL TRANSDUCTION%GOBP%GO:0051056	0.00390209	0.0253825	1	SYNPO2L,HEG1,TGM2,TGFB2,ARHGAP1,PLEKHG3,NOTCH2,COL3A1,ARHGEF12,KALRN,NRP1,ITGAV,MAPRE2,AKAP13,ARHGAP35,RELN,MAP4K4,STMN1,CUL3,MYO9B,RALBP1,SWAP70,KCTD10,ARHGEF40,APOE,DAB2IP,VAV2,ARAP1,ARRB1,DENND4A,KANK2,FGD5,GNA13,PREX2,RAF1,ARHGEF2,MYOC,MAPKAP1,ARHGEF11	1.53276	0.391463	39	115
TRNA PROCESSING%GOBP%GO:0008033	TRNA PROCESSING%GOBP%GO:0008033	0.00393701	0.0255684	-1	TRMU,TRMT6,ZBTB8OS,TRMT1,WDR6,TPRKB,TRMT112,ELP4,YRDC,MOCS3,TRMT61B,ELAC2,SSB,METTL2A,ELP6,THUMPD3,C9ORF64,NSUN6,OSGEP,ELP2	-1.63431	-0.461977	20	53
METABOLISM OF WATER-SOLUBLE VITAMINS AND COFACTORS%REACTOME%R-HSA-196849.3	METABOLISM OF WATER-SOLUBLE VITAMINS AND COFACTORS%REACTOME%R-HSA-196849.3	0.00396388	0.0256571	-1	FASN,BTD,MTHFD2,ACACB,MOCS2,MTHFR,SHMT1,MTHFD2L,NAMPT,AASDHPPT,FOLR2,NADSYN1,AOX1,MCCC2,HLCS,MOCS3,GPHN,ALDH1L1,RFK,PCCB,RNLS,MTHFS,PANK4	-1.58214	-0.428408	23	65
SYNAPTIC VESICLE CYCLE%GOBP%GO:0099504	SYNAPTIC VESICLE CYCLE%GOBP%GO:0099504	0.00396975	0.0256571	1	STX4,CANX,SNCA,STX3,DNM1,SNAP23,STX1A,CPLX1,PIP5K1C,AMPH,FCHO2,UNC13B,SLC32A1,DNAJC5,STX11,DNM2,PICALM,AP3D1,SNAP29,STX2	1.66888	0.520402	20	38
HOMOTYPIC CELL-CELL ADHESION%GOBP%GO:0034109	HOMOTYPIC CELL-CELL ADHESION%GOBP%GO:0034109	0.00396975	0.0256571	1	HBB,ACTN1,RAP2B,ITGB3,FLNA,TLN1,CSRP1,GNAS,VCL,ACTB,ILK,ACTG1,MYH9,FGG,MYL12A,FGB	1.68336	0.524918	16	38
PID_FAK_PATHWAY%MSIGDB_C2%PID_FAK_PATHWAY	PID_FAK_PATHWAY%MSIGDB_C2%PID_FAK_PATHWAY	0.0039818	0.0256937	1	ACTN1,FYN,RRAS,ITGB5,ITGAV,ARHGAP35,TLN1,PXN,ITGB1,RAPGEF1,NCK1,NCK2,RAF1,DOCK1,ARHGEF11,WASL,MAPK1,GRB2	1.67099	0.527867	18	36
MACROMOLECULE CATABOLIC PROCESS%GOBP%GO:0009057	MACROMOLECULE CATABOLIC PROCESS%GOBP%GO:0009057	0.00399574	0.0257425	-1	RCHY1,DERL1,PSMA4,PCNP,UBE2G1,POLR2G,ASB2,CTSC,LYPLA2,NEDD8,ZER1,LRSAM1,ADRM1,PSMD14,PSMB6,CHMP2B,ZFP36L1,LNX1,CHMP2A,UBE2K,PSMA1,PSMB3,MANBA,PSMA7,DNASE2,PSMB4,VPS25,NUDT16L1,FUCA1,PSMC2,PSMB7,SHARPIN,PSMA6,MAGOH,UBXN2B,MIB1,SIRT2,NUB1,VPS4A,SNF8,PSMB2,PSMA2,PSMD7,NCBP2,NT5C3B,LYPLA1,EDC3,AMN1,CHMP7,DENND3,UBE2D4,GSK3A,HSPA1B,PSMB8,EXOSC3,PSMA3,WDR81,CTSZ,NGLY1,SH3GLB1,GSPT1,PPT1,PABPC4,NEDD4L,V…	-1.32694	-0.282643	127	431
PROGRAMMED CELL DEATH%REACTOME%R-HSA-5357801.2	PROGRAMMED CELL DEATH%REACTOME%R-HSA-5357801.2	0.00412182	0.0263475	-1	PSME2,STAT3,PSMA4,PSME1,CD14,PSMD14,PSMB6,CHMP2B,CHMP2A,PSMA1,PSMB3,PSMA7,PSMB4,CDC37,CASP6,PSMC2,PSMB7,PRKCD,PSMA6,PPP1R13B,NMT1,PSMB2,PSMA2,PSMD7,C1QBP,CHMP7,PSMB8,PSMA3,DAPK2,PAK2,PSMD5,IRF2,ELANE,OGT,PSMC1,FADD,CASP9,DFFA	-1.46745	-0.352822	38	138
PYRUVATE METABOLISM%PATHWHIZ%PW000054	PYRUVATE METABOLISM%PATHWHIZ%PW000054	0.00414079	0.0263475	-1	GLO1,ACAT1,ALDH2,ACSS2,MDH1,GRHPR,LDHA,AKR1B1,ME1	-1.74973	-0.636804	9	18
LEIGH SYNDROME%SMPDB%SMP0000196	LEIGH SYNDROME%SMPDB%SMP0000196	0.00414079	0.0263475	-1	GLO1,ACAT1,ALDH2,ACSS2,MDH1,GRHPR,LDHA,AKR1B1,ME1	-1.74973	-0.636804	9	18
PYRUVATE DECARBOXYLASE E1 COMPONENT DEFICIENCY (PDHE1 DEFICIENCY)%SMPDB%SMP0000334	PYRUVATE DECARBOXYLASE E1 COMPONENT DEFICIENCY (PDHE1 DEFICIENCY)%SMPDB%SMP0000334	0.00414079	0.0263475	-1	GLO1,ACAT1,ALDH2,ACSS2,MDH1,GRHPR,LDHA,AKR1B1,ME1	-1.74973	-0.636804	9	18
PYRUVATE DEHYDROGENASE COMPLEX DEFICIENCY%PATHWHIZ%PW000117	PYRUVATE DEHYDROGENASE COMPLEX DEFICIENCY%PATHWHIZ%PW000117	0.00414079	0.0263475	-1	GLO1,ACAT1,ALDH2,ACSS2,MDH1,GRHPR,LDHA,AKR1B1,ME1	-1.74973	-0.636804	9	18
PRIMARY HYPEROXALURIA II, PH2%SMPDB%SMP0000558	PRIMARY HYPEROXALURIA II, PH2%SMPDB%SMP0000558	0.00414079	0.0263475	-1	GLO1,ACAT1,ALDH2,ACSS2,MDH1,GRHPR,LDHA,AKR1B1,ME1	-1.74973	-0.636804	9	18
PYRUVATE KINASE DEFICIENCY%PATHWHIZ%PW000535	PYRUVATE KINASE DEFICIENCY%PATHWHIZ%PW000535	0.00414079	0.0263475	-1	GLO1,ACAT1,ALDH2,ACSS2,MDH1,GRHPR,LDHA,AKR1B1,ME1	-1.74973	-0.636804	9	18
ESTABLISHMENT OF VESICLE LOCALIZATION%GOBP%GO:0051650	ESTABLISHMENT OF VESICLE LOCALIZATION%GOBP%GO:0051650	0.00414191	0.0263475	1	FBXW11,MYO1D,KIF13A,EXOC2,TRAPPC3,NDE1,SNAP23,PEF1,ACTN4,MYO1C,PDCD6,TOR1A,CUL3,KIFAP3,SPG11,TRIP11,DYNC1H1,EXOC7,EXOC3,KIF3B,TBC1D23,AP3B1,DNM2,CLASP1,PREB,TRAPPC9,PICALM,BLOC1S5,WASL,EXOC6B,MYO6,EXOC5,AP3D1,EXOC4,HTT,EXOC1,RAB1A,MYO1B	1.55439	0.413047	38	88
TRIGLYCERIDE CATABOLISM%REACTOME%R-HSA-163560.3	TRIGLYCERIDE CATABOLISM%REACTOME%R-HSA-163560.3	0.00416406	0.0264216	-1	ABHD5,FABP5,PPP1CC,PLIN1,PPP1CA,FABP4,GPD2,LIPE,FABP3,PRKACG	-1.73414	-0.641048	10	17
REGULATION OF AXONOGENESIS%GOBP%GO:0050770	REGULATION OF AXONOGENESIS%GOBP%GO:0050770	0.00416667	0.0264216	1	RTN4,SEMA3D,PLXNA1,DBNL,SEMA5B,NRP1,DBN1,THY1,GOLGA4,MAP2,SEMA3C,ARHGAP35,PLXNB2,PLXNA2	1.67931	0.527523	14	37
REGULATION OF PEPTIDYL-TYROSINE PHOSPHORYLATION%GOBP%GO:0050730	REGULATION OF PEPTIDYL-TYROSINE PHOSPHORYLATION%GOBP%GO:0050730	0.0041902	0.0265292	1	THBS4,FYN,TGFB1,RAP2B,ITGB3,CAV1,HBEGF,IGF2,PIBF1,DLG3,ADAM17,NRP1,THY1,CD74,ACE,RELN,DMTN,CBL,CD44,HRG,PTPN11,APP,PTPN2,EGFR,CD81,NCK2,CNOT7,ARHGEF2,SRCIN1,PLCG2,GPRC5B,CSPG4,DOK7,LYN	1.59038	0.439015	34	71
RIBONUCLEOSIDE TRIPHOSPHATE BIOSYNTHETIC PROCESS%GOBP%GO:0009201	RIBONUCLEOSIDE TRIPHOSPHATE BIOSYNTHETIC PROCESS%GOBP%GO:0009201	0.00419704	0.0265308	-1	NDUFS7,NDUFA12,IMPDH1,ALDOA,NDUFA10,NDUFB7,NDUFA6,NDUFAB1,NDUFV2,NDUFB3,NDUFA5,IMPDH2,NDUFB9,NDUFS3,NDUFA11,MT-ND1,NDUFA9,MT-ATP6,NDUFS6,NDUFS1,NDUFS8,NDUFS4,NDUFB6,NDUFC2,NDUFS2,NDUFV1,NDUFB8	-1.58181	-0.437823	27	59
POSITIVE REGULATION OF SUPRAMOLECULAR FIBER ORGANIZATION%GOBP%GO:1902905	POSITIVE REGULATION OF SUPRAMOLECULAR FIBER ORGANIZATION%GOBP%GO:1902905	0.00432199	0.0272779	1	SYNPO2L,TNXB,CTTN,FCHSD2,CYFIP1,NRP1,MECP2,GSN,PXN,CDC42EP1,COLGALT1,TGFB3,LMOD2,PSEN1,AKAP9,APP,SYNPO,RHOA,APOE,SORBS3,FERMT2,NCK1,NCKAP1,SYNPO2,NCK2,CLASP1,MYOC,BIN1,FER,ARF6,CLU,VASP,CKAP5,CDC42EP3,LMOD1	1.55145	0.412267	35	88
REGULATION OF RESPONSE TO DNA DAMAGE STIMULUS%GOBP%GO:2001020	REGULATION OF RESPONSE TO DNA DAMAGE STIMULUS%GOBP%GO:2001020	0.00434385	0.0273454	-1	TRIAP1,SMARCD3,UBE2V1,ARMT1,SMARCE1,UBE2N,DEK,EEF1E1,TPT1,ACTL6A,NUDT16L1,RUVBL1,ERCC1,PRKCD,SMARCB1,UBE2V2,PPP4C,TIGAR,WDR48,DMAP1,TP53BP1,PPP4R2,RUVBL2,OTUB1,TFIP11,COPS3,RPS3,DYRK1A,CASP9	-1.48401	-0.366779	29	116
ESTABLISHMENT OR MAINTENANCE OF CELL POLARITY%GOBP%GO:0007163	ESTABLISHMENT OR MAINTENANCE OF CELL POLARITY%GOBP%GO:0007163	0.00434625	0.0273454	1	ANK1,FBXW11,SLC9A3R1,CYTH3,DST,SLC9A1,CENPA,DLG3,DOCK7,MAP4,FAM89B,CDC42BPB,NDE1,FSCN1,ARHGAP35,PDLIM1,GJA1,LLGL1,ITGB1,MYO18A,RAB10,SCRIB,RHOA,ACTB,MPP7,DLG1,LMNA,RHOG,PTK2,CLASP1,PARVB,ARHGEF11,CKAP5,HTT,INPPL1	1.59323	0.431704	35	78
REGULATION OF TRANS-SYNAPTIC SIGNALING%GOBP%GO:0099177	REGULATION OF TRANS-SYNAPTIC SIGNALING%GOBP%GO:0099177	0.00437637	0.0274553	1	SYNGR1,STX4,CASK,DLGAP4,HOMER1,DBN1,CAMK2B,PTN,RAP1B,ERC1,ACE,RELN,BTBD9,NPTN,CAMK2A,ITGB1,FMR1,CPLX1,FLOT1,AKAP9,APP,APOE,MAP1A	1.59142	0.436159	23	74
RNA POLYMERASE II TRANSCRIPTION TERMINATION%REACTOME%R-HSA-73856.4	RNA POLYMERASE II TRANSCRIPTION TERMINATION%REACTOME%R-HSA-73856.4	0.00437828	0.0274553	-1	POLDIP3,SNRPG,PAPOLA,CSTF1,MAGOH,DDX39A,NCBP2,CDC40,SNRPD3,SNRPF,NUDT21,CASC3,SRSF11,SNRPE,THOC3,FIP1L1,SRSF3,DHX38,CPSF7,WDR33,THOC6,PABPN1,NCBP1,SYMPK,SRSF6,SRSF5,PCF11,CPSF1,SARNP,SRSF7,CSTF2,EIF4A3,DDX39B,SRSF2,SRSF1	-1.63034	-0.462627	35	52
PEPTIDYL-PROLINE MODIFICATION%GOBP%GO:0018208	PEPTIDYL-PROLINE MODIFICATION%GOBP%GO:0018208	0.00438413	0.0274553	-1	FKBP5,PPIL1,PPIH,EGLN1,NTMT1,PPWD1,PPIL3	-1.75578	-0.601556	7	23
REGULATION OF ION TRANSMEMBRANE TRANSPORT%GOBP%GO:0034765	REGULATION OF ION TRANSMEMBRANE TRANSPORT%GOBP%GO:0034765	0.00444208	0.027775	1	DMD,FYN,CACNA2D1,UTRN,PKD2,FXYD1,SLC9A3R1,CAV1,FLNA,ATP2B4,TRDN,JPH2,SLC9A1,PPP3CC,SNCA,SLMAP,HOMER1,THY1,PLN,RELN,ACTN4,ITGB1,ISCU,FMR1,ANO6,ATP1B3,AKAP9,APP,AHNAK,VDAC1,DLG1,STIM1,ACE2,NPPA,FHL1,YWHAH,CAMK2D,PLCG1,HRC,BIN1	1.52502	0.389553	40	116
RESPONSE TO AMYLOID-BETA%GOBP%GO:1904645	RESPONSE TO AMYLOID-BETA%GOBP%GO:1904645	0.00445046	0.0277844	1	IGF1R,FYN,CACNA2D1,GJA1,PSEN1,APP,ATP1A3	1.74593	0.637612	7	19
METHYLATION%GOBP%GO:0032259	METHYLATION%GOBP%GO:0032259	0.00450552	0.0280846	-1	TRMT6,ARMT1,SNRPG,PRMT3,TRMT1,WDR6,TPMT,SMYD3,TRMT112,METTL5,TFB1M,SNRPD3,DMAP1,NTMT1,TRMT61B,PICK1,AS3MT,SNRPF,GSPT1,MEPCE,INMT,NOP2,OGT,METTL2A,PLD6,ETF1,LCMT1,NFYC,THUMPD3,DPY30,NSUN6,SNRPE,CTR9	-1.52586	-0.389624	33	92
POSITIVE REGULATION OF CALCIUM ION TRANSPORT%GOBP%GO:0051928	POSITIVE REGULATION OF CALCIUM ION TRANSPORT%GOBP%GO:0051928	0.00454976	0.0283087	1	CACNA2D1,PKD2,CAV1,TRDN,JPH2,SLC9A1,PPP3CC,SNCA,PDGFRB,THY1,CAMK2A,MYLK,ATP2B1,ORAI1,STIM1,PLCG1,CXCL12,HTT	1.70467	0.547742	18	33
G2 M TRANSITION%REACTOME DATABASE ID RELEASE 81%69275	G2 M TRANSITION%REACTOME DATABASE ID RELEASE 81%69275	0.00456517	0.0283087	-1	PSME2,PSMA4,PSME1,PSMD14,PSMB6,PPME1,PSMA1,CDK2,PSMB3,PSMA7,PSMB4,PPP2CA,PSMC2,PSMB7,PSMA6,PPP2CB,PSMB2,PSMA2,PSMD7,PSMB8,PSMA3,PCM1,PSMD5,PAFAH1B1,FBXL18,PSMC1,LCMT1,NME7,ODF2,PPP2R2A,RBX1,EP300,PSMC5,PPP2R1A,TUBGCP5,PSMD1,YWHAE,PSMB10,ACTR1A,DCTN3,HSP90AB1,CUL1,PSMF1,HSP90AA1	-1.50209	-0.377618	44	103
MITOTIC G2-G2 M PHASES%REACTOME%R-HSA-453274.2	MITOTIC G2-G2 M PHASES%REACTOME%R-HSA-453274.2	0.00456517	0.0283087	-1	PSME2,PSMA4,PSME1,PSMD14,PSMB6,PPME1,PSMA1,CDK2,PSMB3,PSMA7,PSMB4,PPP2CA,PSMC2,PSMB7,PSMA6,PPP2CB,PSMB2,PSMA2,PSMD7,PSMB8,PSMA3,PCM1,PSMD5,PAFAH1B1,FBXL18,PSMC1,LCMT1,NME7,ODF2,PPP2R2A,RBX1,EP300,PSMC5,PPP2R1A,TUBGCP5,PSMD1,YWHAE,PSMB10,ACTR1A,DCTN3,HSP90AB1,CUL1,PSMF1,HSP90AA1	-1.50209	-0.377618	44	103
PHOSPHATIDYLINOSITOL BIOSYNTHETIC PROCESS%GOBP%GO:0006661	PHOSPHATIDYLINOSITOL BIOSYNTHETIC PROCESS%GOBP%GO:0006661	0.00456955	0.0283087	1	DPM3,PIGN,INPP4B,DPM1,SACM1L,MBOAT7,CDIPT,EFR3A,PI4KA,TTC7B,PI4K2A,PIK3C2B,INPP5D,PIP5K1C,FIG4,INPP4A,PIK3R4	1.6159	0.459925	17	60
FATTY ACID METABOLIC PROCESS%GOBP%GO:0006631	FATTY ACID METABOLIC PROCESS%GOBP%GO:0006631	0.0045798	0.0283288	-1	DBI,FASN,PCK2,ACACB,HADHA,DECR1,HADHB,GSTP1,PTGES3,CPT2,ACAT1,ACSF2,ADH5,GSTM2,THEM4,HSD17B4,PTGR1,ACADVL,ACOT2,GSTM4,ECHS1,PLA2G4C,ACAA2,GCDH,ECI2,NDUFAB1,ACOT8,ADIPOQ,ECHDC3,SCP2,ACAT2,CPT1A,GNPAT,ELOVL1,PCCB,HADH,AUH,ABHD6,CES2,LTC4S,AKR1C1,AKR1C3,CRAT	-1.4602	-0.351081	43	138
THROMBOXANE A2 RECEPTOR SIGNALING%PATHWAY INTERACTION DATABASE NCI-NATURE CURATED DATA%THROMBOXANE A2 RECEPTOR SIGNALING	THROMBOXANE A2 RECEPTOR SIGNALING%PATHWAY INTERACTION DATABASE NCI-NATURE CURATED DATA%THROMBOXANE A2 RECEPTOR SIGNALING	0.00459418	0.0283366	1	TGM2,FYN,GNA14,SLC9A3R1,GNAI2,DNM1,GNA11,ROCK1,GNAQ,RHOA,EGFR,GNA13,NOS3	1.71455	0.567131	13	29
POSITIVE REGULATION OF CARBOHYDRATE METABOLIC PROCESS%GOBP%GO:0045913	POSITIVE REGULATION OF CARBOHYDRATE METABOLIC PROCESS%GOBP%GO:0045913	0.00460123	0.0283366	1	IGF2,SNCA,PRKAA2,MTOR,RPTOR,INSR,SLC4A4,ZBTB20,PSEN1,APP,PTPN2,SORBS1,PRKAA1	1.74953	0.598842	13	25
NEPHRIN FAMILY INTERACTIONS%REACTOME%R-HSA-373753.3	NEPHRIN FAMILY INTERACTIONS%REACTOME%R-HSA-373753.3	0.00460829	0.0283366	1	ACTN1,FYN,CASK,SPTBN1,ACTN4,SPTAN1,NCK1,NCK2,WASL,IQGAP1	1.78729	0.682157	10	16
NEGATIVE REGULATION OF RAS PROTEIN SIGNAL TRANSDUCTION%GOBP%GO:0046580	NEGATIVE REGULATION OF RAS PROTEIN SIGNAL TRANSDUCTION%GOBP%GO:0046580	0.00460918	0.0283366	1	HEG1,TGFB2,ARHGAP35,STMN1,CUL3,KCTD10,DAB2IP,MYOC,MAPKAP1	1.73154	0.623219	9	20
ACTIN CYTOSKELETON REORGANIZATION%GOBP%GO:0031532	ACTIN CYTOSKELETON REORGANIZATION%GOBP%GO:0031532	0.00472322	0.0289935	1	CTTN,MCU,FLNA,FARP2,NRP1,PDLIM4,CDC42BPB,DMTN,PTK7,GSN,S1PR1,CDC42BPA,RICTOR,RHOA,ARAP1,HMCN1,MYH9,PARVB,FER	1.67314	0.531471	19	35
REGULATION OF PROTEIN MODIFICATION BY SMALL PROTEIN CONJUGATION OR REMOVAL%GOBP%GO:1903320	REGULATION OF PROTEIN MODIFICATION BY SMALL PROTEIN CONJUGATION OR REMOVAL%GOBP%GO:1903320	0.00479671	0.0293999	-1	RCHY1,DERL1,COPS2,UBE2V1,NXN,OTUD4,UBE2N,COPS8,PRMT3,DNAJA1,COPS5,COPS4,PARK7,HSPBP1,RPS7,UBE2V2,TSPYL5,BCL10,GSK3A,HSPA1B,COPS6,PTEN,OTUB1,OGT,COPS3,RPS3,SQSTM1,RPL23,GPS1,UBXN1,TBC1D7,SH3RF2,GTPBP4,DDX3X,UBA2,RBX1,DTX3L,DCUN1D1,UBR5,GNL3,RPS2	-1.5077	-0.377232	41	106
PURINE NUCLEOSIDE TRIPHOSPHATE BIOSYNTHETIC PROCESS%GOBP%GO:0009145	PURINE NUCLEOSIDE TRIPHOSPHATE BIOSYNTHETIC PROCESS%GOBP%GO:0009145	0.00481928	0.0294487	-1	NDUFS7,NDUFA12,IMPDH1,ALDOA,NDUFA10,NDUFB7,NDUFA6,NDUFAB1,NDUFV2,NDUFB3,NDUFA5,IMPDH2,NDUFB9,NDUFS3,NDUFA11,MT-ND1,NDUFA9,MT-ATP6,NDUFS6,NDUFS1,NDUFS8,NDUFS4,NDUFB6,NDUFC2,NDUFS2,NDUFV1,NDUFB8	-1.60106	-0.448843	27	55
PURINE RIBONUCLEOSIDE TRIPHOSPHATE BIOSYNTHETIC PROCESS%GOBP%GO:0009206	PURINE RIBONUCLEOSIDE TRIPHOSPHATE BIOSYNTHETIC PROCESS%GOBP%GO:0009206	0.00481928	0.0294487	-1	NDUFS7,NDUFA12,IMPDH1,ALDOA,NDUFA10,NDUFB7,NDUFA6,NDUFAB1,NDUFV2,NDUFB3,NDUFA5,IMPDH2,NDUFB9,NDUFS3,NDUFA11,MT-ND1,NDUFA9,MT-ATP6,NDUFS6,NDUFS1,NDUFS8,NDUFS4,NDUFB6,NDUFC2,NDUFS2,NDUFV1,NDUFB8	-1.60106	-0.448843	27	55
SEMA4D IN SEMAPHORIN SIGNALING%REACTOME DATABASE ID RELEASE 81%400685	SEMA4D IN SEMAPHORIN SIGNALING%REACTOME DATABASE ID RELEASE 81%400685	0.00483372	0.0294923	1	MYH10,RRAS,MYH11,ARHGEF12,ARHGAP35,ROCK1,RHOA,MYL6,MYH9,ARHGEF11,MYH14,ROCK2,MYL9	1.76715	0.654128	13	18
PROTEOLYSIS INVOLVED IN PROTEIN CATABOLIC PROCESS%GOBP%GO:0051603	PROTEOLYSIS INVOLVED IN PROTEIN CATABOLIC PROCESS%GOBP%GO:0051603	0.00485685	0.0295886	-1	RCHY1,DERL1,PSMA4,PCNP,UBE2G1,ASB2,CTSC,NEDD8,ZER1,ADRM1,PSMD14,PSMB6,CHMP2B,LNX1,CHMP2A,UBE2K,PSMA1,PSMB3,PSMA7,PSMB4,VPS25,PSMC2,PSMB7,SHARPIN,PSMA6,UBXN2B,MIB1,SIRT2,NUB1,VPS4A,SNF8,PSMB2,PSMA2,PSMD7,AMN1,CHMP7,UBE2D4,GSK3A,PSMB8,PSMA3,WDR81,CTSZ,NGLY1,NEDD4L,VPS37A,ARRDC1,FAF1,UBE2B,FBXL18,CUL4B,PSMC1,CLGN,COPS3,HDAC6,SQSTM1,ARMC8,ZYG11B,CTSB,NEDD4,CUL2,UBR3,VPS36,CALR,RBCK1,UBXN1,WDR26,RNF20…	-1.33778	-0.296171	80	289
POSITIVE REGULATION OF CHEMOTAXIS%GOBP%GO:0050921	POSITIVE REGULATION OF CHEMOTAXIS%GOBP%GO:0050921	0.00490381	0.0298297	1	THBS4,STX4,TGFB1,MCU,ADAM17,RARRES2,NRP1,PDGFRB,PTN,STX3,CD74	1.64867	0.503441	11	42
REGULATION OF RESPONSE TO WOUNDING%GOBP%GO:1903034	REGULATION OF RESPONSE TO WOUNDING%GOBP%GO:1903034	0.00494959	0.0300628	1	CASK,EMILIN1,CAV1,HBEGF,KLKB1,F11,FAP,MTOR,PHLDB2,CD9,PTN,SERPINE2,DMTN,HRG,MYLK,ITGB1,MMRN1,ANO6,APOE,PLAT,FERMT2,APCS,ACTG1,NOS3,PTK2,CLASP1	1.60091	0.452121	26	63
GLUCOSE METABOLIC PROCESS%GOBP%GO:0006006	GLUCOSE METABOLIC PROCESS%GOBP%GO:0006006	0.00507614	0.0307851	-1	PCK2,HK3,GPI,FOXK2,DCXR,PFKM,PFKFB1,ENO1,ADIPOQ,RBP4,TPI1,GDPGP1	-1.66193	-0.509893	12	36
POSITIVE REGULATION OF CELLULAR COMPONENT BIOGENESIS%GOBP%GO:0044089	POSITIVE REGULATION OF CELLULAR COMPONENT BIOGENESIS%GOBP%GO:0044089	0.00510465	0.0309115	1	SYNPO2L,DAG1,CTTN,COL16A1,DPYSL3,TGFB1,AGRN,EMILIN1,CAV1,SRPX2,FCHSD2,SNCA,CYFIP1,NRP1,PHLDB2,PHLDB1,THY1,TPPP3,FSCN1,STAM,RAP1B,ARHGAP35,PIEZO1,MAP4K4,MECP2,ROCK1,AJUBA,PXN,HRG,CDC42EP1,SNX18,FMR1,FLOT1,TGFB3,LMOD2,HGS,PLEKHM1,ACTR3,LIMS1,AKAP9,SYNPO,RHOA,SORBS3,DAB2IP,RALB,DYNC1H1,ACTR2,UNC13B,PALM,ARAP1,FERMT2,MPP7,CNOT1,NCK1,ACE2,NCKAP1,SYNPO2,NCK2,CLASP1,MYOC,STX18,WASL,BIN1,FER,PLCG2,ARF6,C…	1.43592	0.341538	71	196
CELL-CELL JUNCTION ORGANIZATION%GOBP%GO:0045216	CELL-CELL JUNCTION ORGANIZATION%GOBP%GO:0045216	0.00512258	0.0309735	1	TGFB2,TJP1,TGFB1,CDH11,ESAM,JAM3,CD9,MYADM,FSCN1,TLN1,GJA1,ARVCF,TGFB3,LIMS1,PIP5K1C,VCL,RHOA,ACTB,FERMT2,MPP7,DLG1	1.60421	0.455558	21	61
REGULATION OF PHOSPHATE METABOLIC PROCESS%GOBP%GO:0019220	REGULATION OF PHOSPHATE METABOLIC PROCESS%GOBP%GO:0019220	0.00516212	0.0311244	1	IGF1R,HEG1,THBS4,TGFB2,DMD,EPHB4,ROR1,FYN,TGFB1,RAP2B,APOC1,IGFBP3,INHBE,PKD2,PIK3IP1,SLC9A3R1,ITGA1,ITGB3,TPD52L1,EMILIN1,CAV1,HBEGF,CDA,SRPX2,ATP2B4,EPHA3,PRKAG1,IGF2,PIBF1,DLG3,ADAM17,RARRES2,SNCA,TAOK3,DOCK7,PRKAA2,TMEM119,NRP1,MTOR,PDGFRB,SMCR8,DNAJC30,THY1,BAD,RPTOR,ENPP1,CACUL1,MYADM,CD74,CORO1C,INSR,SLC4A4,ACE,RELN,DMTN,CBL,HLA-DRB1,ROCK1,NPTN,CD44,HRG,ZBTB20,PLXNB2,FMR1,FLOT1,TGFB3,RB1CC…	1.32117	0.292433	130	424
MEMBRANE TRAFFICKING%REACTOME DATABASE ID RELEASE 81%199991	MEMBRANE TRAFFICKING%REACTOME DATABASE ID RELEASE 81%199991	0.00516296	0.0311244	1	SPTA1,CD55,ANK1,GOLIM4,BICD1,TJP1,CTTN,STX4,RIN2,RABGAP1,BET1,SH3D19,RAB31,TPD52L1,RAB35,CYTH3,HBEGF,PRKAG1,SPTBN1,EXOC2,PRKAA2,RAB8B,MAN2A2,SEC23IP,HIP1,TRAPPC3,VTI1A,GOLGA4,SEC31A,STAM,DNM1,SNAP23,COG5,STX16,PRKAB2,GJA1,MYO1C,AP4M1,CBL,USE1,KLC4,RALGAPB,SORT1,TOR1A,SNX18,TBC1D1,VPS45,SEC24B,RAB33B,GALNT2,RAB10,SEC22B,KIFAP3,VAMP3,HGS,ACTR3,SLC2A4,NSF,PIP5K1C,PACSIN3,APP,SPTAN1,AMPH,TRIP11,FCHO2…	1.31658	0.292131	123	413
PROCESSING OF CAPPED INTRONLESS PRE-MRNA%REACTOME DATABASE ID RELEASE 81%75067	PROCESSING OF CAPPED INTRONLESS PRE-MRNA%REACTOME DATABASE ID RELEASE 81%75067	0.00521594	0.0313968	-1	SNRPG,PAPOLA,CSTF1,NCBP2,SNRPD3,SNRPF,NUDT21,SNRPE,FIP1L1,CPSF7,WDR33,PABPN1,NCBP1,SYMPK,PCF11,CPSF1	-1.72439	-0.606557	16	21
PHOSPHATIDYLINOSITOL METABOLIC PROCESS%GOBP%GO:0046488	PHOSPHATIDYLINOSITOL METABOLIC PROCESS%GOBP%GO:0046488	0.00529584	0.0318303	1	DPM3,PIGN,INPP4B,DPM1,SACM1L,MBOAT7,CDIPT,EFR3A,PI4KA,PDGFRB,TTC7B,PI4K2A,PIK3C2B,INPP5D,PIP5K1C,LPGAT1,FIG4,INPP4A,PLCD1,PIK3R4	1.57608	0.437462	20	69
RESPONSE TO GROWTH FACTOR%GOBP%GO:0070848	RESPONSE TO GROWTH FACTOR%GOBP%GO:0070848	0.00531538	0.0318341	1	TGFB2,TGFB1,CILP,LTBP2,RAB35,FMOD,CLEC3B,KIDINS220,ITGB5,COL3A1,MXRA5,NRP1,PDGFRB,ANKRD1,COL1A2,PHOX2B,SMAD2,MYO1C,ROCK1,CD44,SORT1,STAT5B,PXN,ITGB1,TGFB3,TGFBRAP1,LIMS1,PTPN11,CORO1B,DAB2IP,RAPGEF1,FERMT2,RAB14,PRKD2,EGFR,USP9X,FGF1,CHRD,PTK2,EMD,FLT1,PLCG1,FER,EEF1A1,IQGAP1	1.50795	0.381874	45	122
RAS PATHWAY%PANTHER PATHWAY%P04393	RAS PATHWAY%PANTHER PATHWAY%P04393	0.00531915	0.0318341	-1	RPS6KA1,STAT3,MAP2K1,ARAF,MAP2K2,GSK3A,MAPK14,MAP2K4,MAPKAPK3,PAK2,NRAS,MAPK13	-1.63506	-0.484397	12	42
REGULATION OF PHOSPHATIDYLINOSITOL 3-KINASE SIGNALING%GOBP%GO:0014066	REGULATION OF PHOSPHATIDYLINOSITOL 3-KINASE SIGNALING%GOBP%GO:0014066	0.00532016	0.0318341	1	IGF1R,TGFB2,ROR1,PIK3IP1,SLC9A3R1,DCN,PDGFRB,INSR,CBL,PIP5K1C,DAB2IP,EGFR,PTK2,MYOC,FLT1	1.69069	0.549336	15	31
CELLULAR RESPONSE TO GROWTH FACTOR STIMULUS%GOBP%GO:0071363	CELLULAR RESPONSE TO GROWTH FACTOR STIMULUS%GOBP%GO:0071363	0.00533239	0.03186	1	TGFB2,TGFB1,CILP,LTBP2,RAB35,FMOD,CLEC3B,KIDINS220,ITGB5,COL3A1,NRP1,PDGFRB,ANKRD1,COL1A2,PHOX2B,SMAD2,MYO1C,CD44,SORT1,STAT5B,PXN,ITGB1,TGFB3,TGFBRAP1,LIMS1,PTPN11,CORO1B,DAB2IP,RAPGEF1,FERMT2,RAB14,PRKD2,EGFR,USP9X,FGF1,CHRD,PTK2,EMD,FLT1,PLCG1	1.50754	0.38623	40	113
REGULATION OF ENDOCYTOSIS%GOBP%GO:0030100	REGULATION OF ENDOCYTOSIS%GOBP%GO:0030100	0.00539374	0.0321789	1	BICD1,APOC1,RAB31,ITGB3,CAV1,EPHA3,SNCA,ITGAV,HIP1,INSR,ANXA2,CBL,ROCK1,TOR1A,ZFYVE16,FMR1,FLOT1,RUFY2,ANO6,PSEN1,PACSIN3,APP,APOE,ANKRD13D,AAK1,ARRB1,RAB5B,PICALM,WASL,BMP2K,PLCG2,ARF6,CLU	1.52708	0.404433	33	90
MEIOTIC CELL CYCLE PROCESS%GOBP%GO:1903046	MEIOTIC CELL CYCLE PROCESS%GOBP%GO:1903046	0.00541796	0.0322405	1	HSPA2,TUBB8,CENPC,SPIRE1,BAG6,TOP2B,SMC3,KLHDC3	1.71709	0.627079	8	19
SRP-DEPENDENT COTRANSLATIONAL PROTEIN TARGETING TO MEMBRANE%REACTOME DATABASE ID RELEASE 81%1799339	SRP-DEPENDENT COTRANSLATIONAL PROTEIN TARGETING TO MEMBRANE%REACTOME DATABASE ID RELEASE 81%1799339	0.00542005	0.0322405	-1	RPS15A,RPS13,RPS18,RPS9,RPS16,RPS7,RPS4X,RPS17,RPLP2,RPS12,RPS3,RPS20,RPS24,RPL23,RPS27,RPSA,RPS21,RPS15,SRP72,SRP9,RPS2,RPS29,RPS5,RPLP0,RPL18A,RPS19,RPL37,RPL37A,RPL8,SPCS1,RPL34,RPLP1,RPL5,RPS28,RPL3L,RPL27A,RPS11,SRP54,RPL12,RPL13,RPL29,RPL35A,SRP19,RPS10,RPL11,RPL10A,SRP68,RPL6,RPS3A,RPL27,FAU,RPL4,RPL30,RPS25,RPL19	-1.50772	-0.381178	55	98
REGULATION OF PHOSPHORUS METABOLIC PROCESS%GOBP%GO:0051174	REGULATION OF PHOSPHORUS METABOLIC PROCESS%GOBP%GO:0051174	0.00548653	0.0325879	1	IGF1R,HEG1,THBS4,TGFB2,DMD,EPHB4,ROR1,FYN,TGFB1,RAP2B,APOC1,IGFBP3,INHBE,PKD2,PIK3IP1,SLC9A3R1,ITGA1,ITGB3,TPD52L1,EMILIN1,CAV1,HBEGF,CDA,SRPX2,ATP2B4,EPHA3,PRKAG1,IGF2,PIBF1,DLG3,ADAM17,RARRES2,SNCA,TAOK3,DOCK7,PRKAA2,TMEM119,NRP1,MTOR,PDGFRB,SMCR8,DNAJC30,THY1,BAD,RPTOR,ENPP1,CACUL1,MYADM,CD74,CORO1C,INSR,SLC4A4,ACE,RELN,DMTN,CBL,HLA-DRB1,ROCK1,NPTN,CD44,HRG,ZBTB20,PLXNB2,FMR1,FLOT1,TGFB3,RB1CC…	1.31299	0.290606	130	425
NADH METABOLIC PROCESS%GOBP%GO:0006734	NADH METABOLIC PROCESS%GOBP%GO:0006734	0.00563204	0.033403	-1	GPD1L,HK3,FOXK2,MDH1,GPD1,PFKM,ENO1,GPD2,ME1	-1.72489	-0.648895	9	16
FOLIC ACID-CONTAINING COMPOUND METABOLIC PROCESS%GOBP%GO:0006760	FOLIC ACID-CONTAINING COMPOUND METABOLIC PROCESS%GOBP%GO:0006760	0.00565919	0.0335147	-1	PM20D2,MTHFD2,MTHFR,SHMT1,MTHFD2L,AASDHPPT,FPGS,ALDH1L1	-1.7209	-0.659618	8	15
HEART DEVELOPMENT%GOBP%GO:0007507	HEART DEVELOPMENT%GOBP%GO:0007507	0.00568687	0.0336292	1	SYNPO2L,HEG1,SGCG,TGFB2,EPHB4,TGFB1,PKD2,NOTCH2,SGCD,ELN,EMILIN1,COL3A1,ECE1,MYH11,NRP1,PDLIM7,PDLIM4,PDGFRB,ANKRD1,SEMA3C,AKAP13,MICAL2,INSR,PDLIM1,GJA1,ROCK1,MEF2D,S1PR1	1.50144	0.382016	28	119
CELLULAR AMINO ACID BIOSYNTHETIC PROCESS%GOBP%GO:0008652	CELLULAR AMINO ACID BIOSYNTHETIC PROCESS%GOBP%GO:0008652	0.00571187	0.0336926	-1	SEPHS1,GLUD2,MTHFR,SHMT1,AASDHPPT,GLUL,ASL,BCAT2,GOT1,ADI1,ASS1,AASS,MRI1,ALDH1A1	-1.64487	-0.515022	14	33
POSITIVE REGULATION OF ERK1 AND ERK2 CASCADE%GOBP%GO:0070374	POSITIVE REGULATION OF ERK1 AND ERK2 CASCADE%GOBP%GO:0070374	0.00571429	0.0336926	1	ROR1,TGFB1,NOTCH2,GLIPR2,NRP1,PDGFRB,CD74,HLA-DRB1,CD44,PTPN11,NPNT,APP,APOE,GPNMB,FERMT2,ARRB1,PRKD2,EGFR,FGF1	1.60718	0.471488	19	51
POSITIVE REGULATION OF WOUND HEALING%GOBP%GO:0090303	POSITIVE REGULATION OF WOUND HEALING%GOBP%GO:0090303	0.00573285	0.0337085	1	EMILIN1,HBEGF,MTOR,DMTN,HRG,MYLK,ITGB1,ANO6,PLAT,FERMT2,ACTG1,PTK2	1.71517	0.580718	12	26
TRANSLATION FACTORS%WIKIPATHWAYS_20220510%WP107%HOMO SAPIENS	TRANSLATION FACTORS%WIKIPATHWAYS_20220510%WP107%HOMO SAPIENS	0.0057337	0.0337085	-1	EIF4E,EIF5,EIF4A1,EIF2AK2,EEF1D,EIF2S1,EIF3F,EIF4A2,EIF2S3,EEF1A2,ETF1,EIF4B,EEF1B2,EIF5A,EIF4EBP1,GSPT2,EIF2S2,EIF3D,EIF6,EIF2B3	-1.64674	-0.508823	20	35
MODULATION BY SYMBIONT OF ENTRY INTO HOST%GOBP%GO:0052372	MODULATION BY SYMBIONT OF ENTRY INTO HOST%GOBP%GO:0052372	0.00579934	0.0340448	1	CAV1,EXOC2,ITGAV,CD74,HLA-DRB1,GSN,TRIM22,EXOC7,APCS,TRIM26	1.68604	0.594904	10	22
CELLULAR PROCESS INVOLVED IN REPRODUCTION IN MULTICELLULAR ORGANISM%GOBP%GO:0022412	CELLULAR PROCESS INVOLVED IN REPRODUCTION IN MULTICELLULAR ORGANISM%GOBP%GO:0022412	0.00587789	0.0344557	1	JAM2,HSPA2,FBXW11,TUBB8,SPIRE1,TMEM119,CD9,PTN,SERPINA5	1.6415	0.518551	9	36
PID_LYSOPHOSPHOLIPID_PATHWAY%MSIGDB_C2%PID_LYSOPHOSPHOLIPID_PATHWAY	PID_LYSOPHOSPHOLIPID_PATHWAY%MSIGDB_C2%PID_LYSOPHOSPHOLIPID_PATHWAY	0.00590814	0.0345493	1	GNAO1,GNA14,HBEGF,GNAI1,ADCY9,GNA11,PXN,GNAQ,EGFR,GNA13,RELA,LYN,HRAS	1.68696	0.552764	13	30
PLATELET ACTIVATION, SIGNALING AND AGGREGATION%REACTOME%R-HSA-76002.3	PLATELET ACTIVATION, SIGNALING AND AGGREGATION%REACTOME%R-HSA-76002.3	0.00591099	0.0345493	1	PPBP,ACTN1,TGFB2,FYN,STX4,GNA14,TGFB1,ENDOD1,ISLR,ITGB3,FLNA,ITPR1,PF4,IGF2,CLEC3B,GNAI1,RARRES2,TEX264,GNAI2,CD9,RAP1B,GNA11,CFD,ECM1,SERPINA4,TLN1,SPP2,ACTN4,HRG,ABHD12,CHID1,TGFB3,MMRN1,GNAQ,PTPN11,APP,VCL,RHOA,VAV2,PROS1,TAGLN2,ITPR3,ARRB1,GNA13,PCYOX1L,RHOG,RAF1,PTK2,APLP2,MANF,TTN,TOR4A,TUBA4A,FGG,PLCG2,APOOL,CLU,ITPR2,MAPK1,FGB	1.43075	0.348911	60	162
POSITIVE REGULATION OF HYDROLASE ACTIVITY%GOBP%GO:0051345	POSITIVE REGULATION OF HYDROLASE ACTIVITY%GOBP%GO:0051345	0.00596252	0.0348001	1	TGM2,ATP2A3,MUL1,FYN,RABGAP1,AGRN,UACA,ITGA1,AGAP3,DOCK6,SNCA,CAV2,RABGAP1L,DOCK7,MTOR,PDGFRB,HIP1,SMCR8,THY1,MAPRE2,BAD,APOA4,TBC1D9B,CORO1C,MAP4K4,RALGAPB,ROCK1,PDCD6,MBP,GSN,SNX18,TBC1D1,ITGB1,BCAP31,GNAQ,RALBP1,LIMS1,SCRIB,RHOA,ASPH,COL4A3,RAPGEF1,RCN3,ITGA6,PPP1R12A,ARAP1,FERMT2,RGS6,PRKD2,SGSM1,EGFR,GNA13,HSPE1,RHOG,EGLN3,IFT57,SIPA1,RPS27L,FLT1,PICALM,DDRGK1	1.42462	0.338946	61	195
POSITIVE REGULATION OF CATALYTIC ACTIVITY%GOBP%GO:0043085	POSITIVE REGULATION OF CATALYTIC ACTIVITY%GOBP%GO:0043085	0.00597449	0.0348195	1	IGF1R,TGM2,ATP2A3,TGFB2,EPHB4,MUL1,ROR1,FYN,STX4,TGFB1,RABGAP1,AGRN,PKD2,UACA,ITGA1,ITGB3,TPD52L1,CAV1,HBEGF,NPR3,ATP2B4,EPHA3,PRKAG1,IGF2,PIBF1,AGAP3,DLG3,ADAM17,DOCK6,SNCA,CAV2,TAOK3,RABGAP1L,DOCK7,MTOR,PDGFRB,HIP1,SMCR8,THY1,MAPRE2,BAD,RPTOR,APOA4,CACUL1,CD74,TBC1D9B,CORO1C,INSR,ACE,RELN,MAP4K4,HLA-DRB1,RALGAPB,ROCK1,PDCD6,MBP,GSN,SNX18,TBC1D1,ITGB1,ISCU,BCAP31,GNAQ,TLR3,RALBP1,LIMS1,SCRIB,PSE…	1.33397	0.29835	104	371
TRNA MODIFICATION IN THE NUCLEUS AND CYTOSOL%REACTOME DATABASE ID RELEASE 81%6782315	TRNA MODIFICATION IN THE NUCLEUS AND CYTOSOL%REACTOME DATABASE ID RELEASE 81%6782315	0.00603789	0.0351164	-1	TRMT6,TP53RK,LAGE3,TRMT1,TPRKB,TRMT112	-1.70908	-0.631782	6	17
ION CHANNEL TRANSPORT%REACTOME%R-HSA-983712.2	ION CHANNEL TRANSPORT%REACTOME%R-HSA-983712.2	0.00604285	0.0351164	1	ATP2A3,ANO1,TRPV2,TPCN1,FXYD1,TRPM4,CAMK2G,ATP2B4,TRDN,ATP9A,CAMK2B,PLN,ATP6V1C1,CAMK2A,TCIRG1,ATP2B1,ANO6,ATP1B3,TSC22D3,ASPH	1.58277	0.444615	20	65
POSITIVE REGULATION OF INTRACELLULAR SIGNAL TRANSDUCTION%GOBP%GO:1902533	POSITIVE REGULATION OF INTRACELLULAR SIGNAL TRANSDUCTION%GOBP%GO:1902533	0.00606856	0.0352151	1	MID1,IGF1R,SYNPO2L,TGM2,RTN4,TGFB2,MUL1,ROR1,TGFB1,NOTCH2,SLC9A3R1,TPD52L1,GLIPR2,CAV1,HBEGF,FLNA,IGF2,SLC9A1,COL3A1,MIB2,PPP3CC,CAV2,TAOK3,DCN,NRP1,PDGFRB,ANKRD1,ITGAV,HIP1,SMCR8,MAPRE2,RPTOR,AKAP13,CD74,INSR,ECM1,TAOK1,RELN,ACTN4,GJA1,MAP4K4,CBL,HLA-DRB1,ROCK1,CD44,S100A13,TRIM22,ITGB1,BCAP31,RELL1,STK25,TLR3,LIMS1,PTPN11,C18ORF32,NPNT,APP,RICTOR,RHOA,APOE,DAB2IP,GPNMB,IFI35,FERMT2,FZD7,SEH1L,N…	1.34659	0.305634	81	314
REGULATION OF CHROMOSOME ORGANIZATION%GOBP%GO:0033044	REGULATION OF CHROMOSOME ORGANIZATION%GOBP%GO:0033044	0.00611552	0.0354127	-1	CENPV,SMARCD3,SMARCE1,CDK2,ACTL6A,RUVBL1,ERCC1,SMARCB1,SSBP1,NEK7,PPHLN1,CCT2,CCT4,RUVBL2,NAA10,SMC2,PCID2,USP7,LCMT1,UCHL5,SMARCC1,CCT7,BAZ1B,HNRNPD,EXOSC10,CTCF,XRCC5,DYNC1LI1,GNL3,CCT3	-1.48195	-0.373931	30	100
REGULATION OF CATION CHANNEL ACTIVITY%GOBP%GO:2001257	REGULATION OF CATION CHANNEL ACTIVITY%GOBP%GO:2001257	0.00612018	0.0354127	1	DMD,CACNA2D1,PKD2,CAV1,TRDN,JPH2,PPP3CC,SLMAP,HOMER1,RELN,ITGB1,FMR1,APP,AHNAK,DLG1,STIM1,NPPA,CAMK2D,HRC	1.62162	0.481234	19	48
REGULATION OF ENDOTHELIAL CELL PROLIFERATION%GOBP%GO:0001936	REGULATION OF ENDOTHELIAL CELL PROLIFERATION%GOBP%GO:0001936	0.00615327	0.0355532	1	THBS4,EGFL7,TNFSF12,ITGB3,CAV1,IGF2,ADAM17,CAV2,NRP1,ECM1,PDCD6,APOE,COL4A3,PTPRM,PRKD2,FLT1,PLCG1,NF1,ANG,HMGB2	1.62906	0.491819	20	44
LPA RECEPTOR MEDIATED EVENTS%PATHWAY INTERACTION DATABASE NCI-NATURE CURATED DATA%LPA RECEPTOR MEDIATED EVENTS	LPA RECEPTOR MEDIATED EVENTS%PATHWAY INTERACTION DATABASE NCI-NATURE CURATED DATA%LPA RECEPTOR MEDIATED EVENTS	0.00619021	0.0357155	1	GNAO1,GNA14,HBEGF,GNAI1,GNAI2,ADCY9,GNA11,PXN,GNAQ,RHOA,EGFR,GNA13,PTK2,PLCG1,RELA,LYN,HRAS	1.62609	0.50121	17	40
CELLULAR LIPID METABOLIC PROCESS%GOBP%GO:0044255	CELLULAR LIPID METABOLIC PROCESS%GOBP%GO:0044255	0.00624675	0.0359902	-1	PMVK,RETSAT,DBI,ABHD5,FASN,PCK2,ACACB,HADHA,ITPKB,DECR1,LYPLA2,MVD,PRDX6,PTDSS1,HADHB,GSTP1,PTGES3,CPT2,HMGCR,CPTP,CRLS1,GGPS1,LCLAT1,ACAT1,MVK,PLBD2,ACSF2,FDPS,FUCA1,ADH5,PPP2CA,RBP1,BCO2,HMGCS2,GSTM2,THEM4,PIP4K2C,HSD17B4,SIRT2,PTGR1,IDI1,GBA,ACADVL,NCEH1,LPCAT4,ACOT2,GSTM4,PGP,ADH1B,ECHS1,PLA2G4C,ACAA2,GCDH,ECI2,PNPLA2,PPT1,NDUFAB1,PIGO,PTEN,DGKA,ACOT8,ADIPOQ,ST3GAL1,ACP6,SCPEP1,ECHDC3,RBP4,PA…	-1.31084	-0.284135	102	351
DNA DAMAGE BYPASS%REACTOME%R-HSA-73893.1	DNA DAMAGE BYPASS%REACTOME%R-HSA-73893.1	0.00625913	0.0360101	-1	RCHY1,WDR48,USP10,UBE2B,CUL4B,PCNA,RBX1,RPA3	-1.71584	-0.60355	8	21
REGULATION OF DENDRITE DEVELOPMENT%GOBP%GO:0050773	REGULATION OF DENDRITE DEVELOPMENT%GOBP%GO:0050773	0.00627138	0.0360292	1	SDC2,DBNL,DBN1,CAMK2B,MARK1,SS18L1,PTN,RELN,DAB2IP,COBL,SARM1,YWHAH,CUL7	1.70201	0.56624	13	28
REGULATION OF LAMELLIPODIUM ORGANIZATION%GOBP%GO:1902743	REGULATION OF LAMELLIPODIUM ORGANIZATION%GOBP%GO:1902743	0.00630613	0.0361773	1	CYFIP1,FSCN1,CORO1C,DMTN,CD44,HRG,ACTR3,CORO1B,ACTR2,NCKAP1,FER	1.70536	0.577397	11	26
MONOCARBOXYLIC ACID CATABOLIC PROCESS%GOBP%GO:0072329	MONOCARBOXYLIC ACID CATABOLIC PROCESS%GOBP%GO:0072329	0.00637783	0.0365366	-1	PCK2,HADHA,DECR1,HADHB,CPT2,PGD,ACAT1,HSD17B4,ACADVL,ECHS1,ACAA2,GCDH,ECI2,ACOT8,ADIPOQ,SCP2,ACAT2,PCCB,HADH,AUH	-1.54927	-0.422436	20	63
EBOLA VIRUS INFECTION IN HOST%WIKIPATHWAYS_20220510%WP4217%HOMO SAPIENS	EBOLA VIRUS INFECTION IN HOST%WIKIPATHWAYS_20220510%WP4217%HOMO SAPIENS	0.00639153	0.0365632	1	IGF1R,ACTN1,ITGA1,ITGB3,FLNA,ADAM17,CAV2,ITGAV,ACTN4,HLA-DRB1,ITGB1,CREBBP,HLA-DPA1,VPS41,DAB2IP,VAV2,ITGA6,NFKB2,HLA-C,TBK1,EGFR,ACTG1,VPS18,VPS33A,MAPK1,HLA-E,RELA,CLTC,HLA-F,PRKRA,FLNB,CLTB,HLA-DPB1	1.5621	0.433582	33	69
CELLULAR MODIFIED AMINO ACID METABOLIC PROCESS%GOBP%GO:0006575	CELLULAR MODIFIED AMINO ACID METABOLIC PROCESS%GOBP%GO:0006575	0.00642588	0.0367076	-1	PM20D2,MTHFD2,MTHFR,PTDSS1,GCLM,SHMT1,GSTP1,MTHFD2L,CPT2,AASDHPPT,GSR,ETHE1,GSTM2,CKM,PARK7,GAMT,LPCAT4,GSTM4,FPGS,ALDH1L1,GSTT2B,CPT1A,PTDSS2,ASS1,MTHFS,CKMT2,CKB	-1.51318	-0.403	27	72
REGULATION OF TRANSMEMBRANE TRANSPORT%GOBP%GO:0034762	REGULATION OF TRANSMEMBRANE TRANSPORT%GOBP%GO:0034762	0.00652327	0.0372113	1	DMD,FYN,CACNA2D1,UTRN,PKD2,FXYD1,SLC9A3R1,CAV1,FLNA,ATP2B4,TRDN,JPH2,SLC9A1,PPP3CC,SNCA,SLMAP,HOMER1,THY1,ENPP1,PLN,INSR,RELN,ACTN4,ITGB1,ISCU,FMR1,ANO6,PTPN11,ATP1B3,AKAP9,APP,AHNAK,ACTB,VDAC1,SORBS1,DLG1,STIM1,ACE2,NPPA,FHL1,YWHAH,CAMK2D,PLCG1,HRC,BIN1	1.46608	0.363527	45	144
BRANCHED-CHAIN AMINO ACID CATABOLIC PROCESS%GOBP%GO:0009083	BRANCHED-CHAIN AMINO ACID CATABOLIC PROCESS%GOBP%GO:0009083	0.0066625	0.0379518	-1	ALDH6A1,ACAT1,BCKDHB,MCCC2,ECHS1,HIBADH,BCKDHA	-1.69843	-0.627847	7	17
WATER-SOLUBLE VITAMIN METABOLIC PROCESS%GOBP%GO:0006767	WATER-SOLUBLE VITAMIN METABOLIC PROCESS%GOBP%GO:0006767	0.00675105	0.0383856	-1	PM20D2,BTD,MTHFD2,SHMT1,MTHFD2L,AASDHPPT,RGN,HLCS,FPGS,RFK,MTHFS	-1.66566	-0.543206	11	28
LXRS REGULATE GENE EXPRESSION LINKED TO CHOLESTEROL TRANSPORT AND EFFLUX%REACTOME DATABASE ID RELEASE 81%9029569	LXRS REGULATE GENE EXPRESSION LINKED TO CHOLESTEROL TRANSPORT AND EFFLUX%REACTOME DATABASE ID RELEASE 81%9029569	0.00676721	0.0383856	1	AGO2,APOC1,NCOR2,AGO1,APOE,TBL1XR1,MOV10,RXRB,HDAC3,NCOA1,KDM1A	1.73111	0.640788	11	18
CELLULAR RESPONSE TO AMYLOID-BETA%GOBP%GO:1904646	CELLULAR RESPONSE TO AMYLOID-BETA%GOBP%GO:1904646	0.00676721	0.0383856	1	IGF1R,FYN,CACNA2D1,GJA1,PSEN1,APP,ATP1A3	1.73487	0.64218	7	18
UBIQUITIN-DEPENDENT PROTEIN CATABOLIC PROCESS%GOBP%GO:0006511	UBIQUITIN-DEPENDENT PROTEIN CATABOLIC PROCESS%GOBP%GO:0006511	0.00678733	0.0384457	-1	RCHY1,DERL1,PSMA4,PCNP,UBE2G1,ASB2,NEDD8,ADRM1,PSMD14,PSMB6,CHMP2B,LNX1,CHMP2A,UBE2K,PSMA1,PSMB3,PSMA7,PSMB4,VPS25,PSMC2,PSMB7,SHARPIN,PSMA6,UBXN2B,MIB1,SIRT2,NUB1,VPS4A,SNF8,PSMB2,PSMA2,PSMD7,AMN1,CHMP7,UBE2D4,GSK3A,PSMA3,WDR81,NEDD4L,VPS37A,ARRDC1,FAF1,UBE2B,FBXL18,CUL4B,PSMC1,CLGN,COPS3,SQSTM1,ARMC8,NEDD4,CUL2,UBR3,VPS36,CALR,RBCK1,UBXN1,WDR26,RNF20,DCAF11,PPP2R5C,ATE1,RNF167,RBX1,DTX3L,CHMP1B…	-1.34177	-0.301992	71	249
SIGNALING EVENTS MEDIATED BY VEGFR1 AND VEGFR2%PATHWAY INTERACTION DATABASE NCI-NATURE CURATED DATA%SIGNALING EVENTS MEDIATED BY VEGFR1 AND VEGFR2	SIGNALING EVENTS MEDIATED BY VEGFR1 AND VEGFR2%PATHWAY INTERACTION DATABASE NCI-NATURE CURATED DATA%SIGNALING EVENTS MEDIATED BY VEGFR1 AND VEGFR2	0.00684045	0.0386795	1	MYOF,FBXW11,FYN,ITGB3,CAV1,ITGAV,CBL,ROCK1,PXN,HGS,PTPN11,VCL,RHOA,PTPN2,SHB,NCK1,NOS3,DNM2,NCK2,RAF1,PTK2,FLT1,PLCG1,IQGAP1,MAPK1,GRB2	1.57829	0.45791	26	54
FATTY ACID CATABOLIC PROCESS%GOBP%GO:0009062	FATTY ACID CATABOLIC PROCESS%GOBP%GO:0009062	0.0068478	0.0386795	-1	PCK2,HADHA,DECR1,HADHB,CPT2,ACAT1,HSD17B4,ACADVL,ECHS1,ACAA2,GCDH,ECI2,ACOT8,ADIPOQ,SCP2,ACAT2,PCCB,HADH,AUH	-1.54736	-0.428288	19	59
REGULATION OF VESICLE-MEDIATED TRANSPORT%GOBP%GO:0060627	REGULATION OF VESICLE-MEDIATED TRANSPORT%GOBP%GO:0060627	0.00692217	0.0390449	1	TGM2,COLEC10,CFP,BICD1,STX4,ARHGAP1,APOC1,RAB31,CADPS,ITGB3,CAV1,EPHA3,DYSF,SNCA,ATP9A,RAB8B,SIRPB1,NRP1,ITGAV,HIP1,SMCR8,YIPF5,STAM,RAP1B,INSR,STX1A,ANXA2,CBL,ROCK1,TOR1A,ZFYVE16,PTPN23,FMR1,CPLX1,FLOT1,RAB33B,MYO18A,RAB10,RUFY2,HGS,NSF,ANO6,PSEN1,PACSIN3,DNAJC13,APP,APOE,ANKRD13D,GAB2,LMAN2,RAB8A,AAK1,VAMP7,ARRB1,DNAJC5,RAB5B,CLASP1,PREB,STX18,PICALM,VPS18,C12ORF4,WASL,BMP2K,FGG,FER,PLCG2,ARF6	1.4019	0.330345	68	216
CHOLESTEROL METABOLISM WITH BLOCH AND KANDUTSCH-RUSSELL PATHWAYS%WIKIPATHWAYS_20220510%WP4718%HOMO SAPIENS	CHOLESTEROL METABOLISM WITH BLOCH AND KANDUTSCH-RUSSELL PATHWAYS%WIKIPATHWAYS_20220510%WP4718%HOMO SAPIENS	0.00703351	0.0396175	-1	PMVK,FASN,MVD,HMGCR,GGPS1,MVK,FDPS,IDI1,ACOT2	-1.70513	-0.611319	9	19
SPLICEOSOMAL SNRNP ASSEMBLY%GOBP%GO:0000387	SPLICEOSOMAL SNRNP ASSEMBLY%GOBP%GO:0000387	0.00711595	0.040026	-1	CD2BP2,SNRPG,SNRPD3,SNRPF,STRAP,LSM4,LSM2,SNRPE,GEMIN6,SRSF10,AAR2,SNRPC,CLNS1A,PRPF31	-1.6716	-0.538966	14	29
VESICLE-MEDIATED TRANSPORT IN SYNAPSE%GOBP%GO:0099003	VESICLE-MEDIATED TRANSPORT IN SYNAPSE%GOBP%GO:0099003	0.00713883	0.0400988	1	STX4,CANX,SNCA,STX3,DNM1,SNAP23,STX1A,CPLX1,PIP5K1C,AMPH,FCHO2,UNC13B,SLC32A1,DNAJC5,STX11,AP2A2,DNM2,PICALM,AP3D1	1.61722	0.490959	19	43
PAR1-MEDIATED THROMBIN SIGNALING EVENTS%PATHWAY INTERACTION DATABASE NCI-NATURE CURATED DATA%PAR1-MEDIATED THROMBIN SIGNALING EVENTS	PAR1-MEDIATED THROMBIN SIGNALING EVENTS%PATHWAY INTERACTION DATABASE NCI-NATURE CURATED DATA%PAR1-MEDIATED THROMBIN SIGNALING EVENTS	0.00721747	0.0404279	1	GNAO1,GNA14,GNAI1,GNAI2,AKAP13,DNM1,GNA11,ROCK1,GNAQ,RHOA,ARRB1,GNA13,NOS3,DNM2	1.6562	0.53519	14	32
A6B1 AND A6B4 INTEGRIN SIGNALING%PATHWAY INTERACTION DATABASE NCI-NATURE CURATED DATA%A6B1 AND A6B4 INTEGRIN SIGNALING	A6B1 AND A6B4 INTEGRIN SIGNALING%PATHWAY INTERACTION DATABASE NCI-NATURE CURATED DATA%A6B1 AND A6B4 INTEGRIN SIGNALING	0.00721747	0.0404279	1	ITGB4,LAMB2,LAMA5,CD9,LAMA2,LAMA3,ITGB1,LAMA4,ITGA6,EGFR,RXRB,YWHAQ,YWHAH,LAMC1	1.66158	0.536926	14	32
MODIFICATION-DEPENDENT PROTEIN CATABOLIC PROCESS%GOBP%GO:0019941	MODIFICATION-DEPENDENT PROTEIN CATABOLIC PROCESS%GOBP%GO:0019941	0.00727912	0.0407166	-1	RCHY1,DERL1,PSMA4,PCNP,UBE2G1,ASB2,NEDD8,ADRM1,PSMD14,PSMB6,CHMP2B,LNX1,CHMP2A,UBE2K,PSMA1,PSMB3,PSMA7,PSMB4,VPS25,PSMC2,PSMB7,SHARPIN,PSMA6,UBXN2B,MIB1,SIRT2,NUB1,VPS4A,SNF8,PSMB2,PSMA2,PSMD7,AMN1,CHMP7,UBE2D4,GSK3A,PSMA3,WDR81,NEDD4L,VPS37A,ARRDC1,FAF1,UBE2B,FBXL18,CUL4B,PSMC1,CLGN,COPS3,SQSTM1,ARMC8,NEDD4,CUL2,UBR3,VPS36,CALR,RBCK1,UBXN1,WDR26,RNF20,DCAF11,PPP2R5C,ATE1,RNF167,RBX1,DTX3L,CHMP1B…	-1.32807	-0.298167	88	254
REGULATION OF DNA REPAIR%GOBP%GO:0006282	REGULATION OF DNA REPAIR%GOBP%GO:0006282	0.0073317	0.040954	-1	SMARCD3,UBE2V1,SMARCE1,UBE2N,DEK,ACTL6A,NUDT16L1,RUVBL1,SMARCB1,UBE2V2,PPP4C,TIGAR,WDR48,DMAP1,TP53BP1,PPP4R2,RUVBL2,OTUB1,TFIP11,RPS3	-1.50326	-0.395388	20	77
VEGFR1 SPECIFIC SIGNALS%PATHWAY INTERACTION DATABASE NCI-NATURE CURATED DATA%VEGFR1 SPECIFIC SIGNALS	VEGFR1 SPECIFIC SIGNALS%PATHWAY INTERACTION DATABASE NCI-NATURE CURATED DATA%VEGFR1 SPECIFIC SIGNALS	0.00735294	0.0410158	1	CAV1,NRP1,CBL,PTPN11,NCK1,NOS3,FLT1,PLCG1,MAPK1	1.69346	0.61845	9	19
NEGATIVE REGULATION OF CELL GROWTH%GOBP%GO:0030308	NEGATIVE REGULATION OF CELL GROWTH%GOBP%GO:0030308	0.00739508	0.0411795	1	RTN4,TGFB2,DACT3,MUL1,SEMA3D,DCBLD2,TGFB1,CDA,SEMA5B,MAP2,ENPP1,SEMA3C,GJA1,CDKN2AIP,HRG	1.57598	0.457237	15	54
ALCOHOL BIOSYNTHETIC PROCESS%GOBP%GO:0046165	ALCOHOL BIOSYNTHETIC PROCESS%GOBP%GO:0046165	0.00740271	0.0411795	-1	PMVK,PCK2,ITPKB,MVD,HMGCR,MVK,PARK7,GBA,GOT1,PGP,ACAA2,ASAH1,QDPR	-1.62786	-0.499442	13	36
POSITIVE REGULATION OF LAMELLIPODIUM ORGANIZATION%GOBP%GO:1902745	POSITIVE REGULATION OF LAMELLIPODIUM ORGANIZATION%GOBP%GO:1902745	0.00748848	0.0415938	1	CYFIP1,FSCN1,CORO1C,ACTR3,CORO1B,ACTR2,NCKAP1	1.74171	0.664761	7	16
CELL-CELL SIGNALING%GOBP%GO:0007267	CELL-CELL SIGNALING%GOBP%GO:0007267	0.00749782	0.0415938	1	STX4,AGRN,CACNA2D1,PKD2,CAV1,TRPM4,CAMK2G,DAAM1,FCHSD2,SNCA,NRP1,HOMER1,GNAI2,PDLIM4,THY1,LTBP3,STX3,SNAP23,GNA11,ERC1,STX1A,GJA1,RAB11FIP5,SLC12A7,MBP,CPLX1,CSNK1A1,GNAQ,WNT9B,SPG11,PIP5K1C,AKAP9,CNP,RHOA,AMPH,KCMF1,APOE,GPNMB,SLC12A4,UNC13B,ATXN3,FERMT2,FZD7,SLC32A1,DLG1,DNAJC5,STX11	1.42838	0.350283	47	155
SYNAPSE ORGANIZATION%GOBP%GO:0050808	SYNAPSE ORGANIZATION%GOBP%GO:0050808	0.00751053	0.0416071	1	IGF1R,FYN,FARP1,AGRN,DBNL,SNCA,CYFIP1,DBN1,PPFIA4,INSR,ERC1,PLXNB2,PSEN1,APP,SYNPO,APOE,ACTB,PPFIA1,UNC13B	1.57102	0.442429	19	64
GLYCOSAMINOGLYCAN METABOLISM%REACTOME%R-HSA-1630316.2	GLYCOSAMINOGLYCAN METABOLISM%REACTOME%R-HSA-1630316.2	0.00758438	0.0419586	1	SDC2,AGRN,HSPG2,BGN,VCAN,FMOD,OGN,EXT2,SLC9A1,PRELP,LUM,DCN,B3GALT6,CD44	1.62212	0.512428	14	36
MONOSACCHARIDE BIOSYNTHETIC PROCESS%GOBP%GO:0046364	MONOSACCHARIDE BIOSYNTHETIC PROCESS%GOBP%GO:0046364	0.00766046	0.042309	-1	PCK2,GPI,RGN,PFKFB1,RBP4,TPI1,AKR1B1	-1.68967	-0.614947	7	18
REGULATION OF EXTRACELLULAR MATRIX ORGANIZATION%GOBP%GO:1903053	REGULATION OF EXTRACELLULAR MATRIX ORGANIZATION%GOBP%GO:1903053	0.00766871	0.042309	1	TNXB,DAG1,AEBP1,LAMB2,TGFB1,EMILIN1,FAP,PHLDB2,PHLDB1,LAMA2,FSCN1,COLGALT1,NID1	1.69716	0.580918	13	25
NOD1 2 SIGNALING PATHWAY%REACTOME%R-HSA-168638.2	NOD1 2 SIGNALING PATHWAY%REACTOME%R-HSA-168638.2	0.00771798	0.0425227	-1	UBE2V1,UBE2N,AAMP,MAPK14,MAPK13,CASP9,TAB1,CASP1	-1.70522	-0.641495	8	16
DNA DOUBLE-STRAND BREAK REPAIR%REACTOME%R-HSA-5693532.3	DNA DOUBLE-STRAND BREAK REPAIR%REACTOME%R-HSA-5693532.3	0.00776029	0.0426393	-1	KPNA2,UBE2N,CDK2,ERCC1,UBE2V2,PPP4C,SUMO2,TP53BP1,PPP4R2,UBXN1,PCNA,BAZ1B,RPA3,XRCC5,XRCC6,NHEJ1,BRCC3,TDP2	-1.59313	-0.467928	18	44
PHASE II - CONJUGATION OF COMPOUNDS%REACTOME DATABASE ID RELEASE 81%156580	PHASE II - CONJUGATION OF COMPOUNDS%REACTOME DATABASE ID RELEASE 81%156580	0.00776029	0.0426393	-1	MGST1,GCLM,GSTP1,GGCT,TPMT,GSTM2,TRMT112,GSS,GSTM4,PAPSS2,CNDP2,AS3MT,GSTT2B	-1.59386	-0.468143	13	44
PROTEOLYSIS%GOBP%GO:0006508	PROTEOLYSIS%GOBP%GO:0006508	0.00785908	0.0429262	-1	PM20D2,RCHY1,CPM,HINT1,DERL1,COPS2,PSMA4,PCNP,UBE2G1,ASB2,CTSC,OTUD4,NEDD8,ZER1,ADRM1,COPS8,PSMD14,PSMB6,CHMP2B,CTSA,LNX1,CHMP2A,UBE2K,PSMA1,PSMB3,PSMA7,USP8,PSMB4,NPEPPS,VPS25,CASP6,PSMC2,PSMB7,HP,SHARPIN,CAPNS1,PSMA6,COPS5,COPS4,UBXN2B,MIB1,SIRT2,NUB1,VPS4A,SNF8,PSMB2,CORIN,PSMA2,PSMD7,OTULIN,WDR48,USP14,AMN1,CHMP7,UBE2D4,GSK3A,PSMB8,CNDP2,USP10,PSMA3,WDR81,METAP2,CTSZ,NGLY1,COPS6,PITRM1,SENP8,…	-1.26215	-0.267269	114	467
NEGATIVE REGULATION OF SMALL GTPASE MEDIATED SIGNAL TRANSDUCTION%GOBP%GO:0051058	NEGATIVE REGULATION OF SMALL GTPASE MEDIATED SIGNAL TRANSDUCTION%GOBP%GO:0051058	0.00786344	0.0429262	1	HEG1,TGFB2,ARHGAP35,STMN1,CUL3,KCTD10,DAB2IP,MYOC,MAPKAP1	1.67662	0.578367	9	24
NADH DEHYDROGENASE COMPLEX ASSEMBLY%GOBP%GO:0010257	NADH DEHYDROGENASE COMPLEX ASSEMBLY%GOBP%GO:0010257	0.00786541	0.0429262	-1	NDUFS7,NDUFA10,NDUFB7,NDUFA6,NDUFAB1,NDUFB3,NDUFA5,TMEM126B,BCS1L,ECSIT,NDUFB9,NDUFS3,NDUFA11,MT-ND1,NUBPL,NDUFA9,NDUFS1,NDUFS8,NDUFS4,NDUFB6,NDUFC2,NDUFS2,NDUFAF5,NDUFB8,NDUFAF1,NDUFB4,NDUFA2,NDUFS5,NDUFA1,NDUFAF6	-1.55874	-0.443802	30	51
MITOCHONDRIAL RESPIRATORY CHAIN COMPLEX I ASSEMBLY%GOBP%GO:0032981	MITOCHONDRIAL RESPIRATORY CHAIN COMPLEX I ASSEMBLY%GOBP%GO:0032981	0.00786541	0.0429262	-1	NDUFS7,NDUFA10,NDUFB7,NDUFA6,NDUFAB1,NDUFB3,NDUFA5,TMEM126B,BCS1L,ECSIT,NDUFB9,NDUFS3,NDUFA11,MT-ND1,NUBPL,NDUFA9,NDUFS1,NDUFS8,NDUFS4,NDUFB6,NDUFC2,NDUFS2,NDUFAF5,NDUFB8,NDUFAF1,NDUFB4,NDUFA2,NDUFS5,NDUFA1,NDUFAF6	-1.55874	-0.443802	30	51
TRNA PROCESSING%REACTOME DATABASE ID RELEASE 81%72306	TRNA PROCESSING%REACTOME DATABASE ID RELEASE 81%72306	0.00794527	0.0429262	-1	TRMU,NUP43,TRMT6,TP53RK,LAGE3,ZBTB8OS,TSEN15,TRMT1,TPRKB,TRMT112,TRMT61B,ELAC2,NUP155	-1.527	-0.420904	13	60
SYSTEM PROCESS%GOBP%GO:0003008	SYSTEM PROCESS%GOBP%GO:0003008	0.00800131	0.0429262	1	MYOF,HBB,MCAM,ATP2A3,SGCG,DMD,ANO1,TJP1,TRPV2,ROR1,GNAO1,FYN,TGFB1,CACNA2D1,UTRN,FXYD1,SLC9A3R1,SGCD,ELN,CAV1,TRPM4,NPR3,ATP2B4,TRDN,SGCA,COL18A1,ECE1,GATM,DDAH1,MYL6B,MYH11,CYFIP1,PBLD,CYB5R3,VTI1A,MYCBP2,PTN,SSPN,PLN,AKAP13,SNTB1,INSR,SYNM,SLC4A4,COL1A2,PHOX2B,HOMER2,ACE,LIMA1,GJA1,COL1A1,ROCK1,SCN7A,GSN,MYLK,GNAS,SLC2A1,LMOD2,CBR3,ATP2B1,SLC2A4,PSEN1,CIC,APP,PLVAP,MME,ASPH,APOE,COL4A3,MAP1A,EF…	1.32548	0.299229	107	334
RESPONSE TO ACID CHEMICAL%GOBP%GO:0001101	RESPONSE TO ACID CHEMICAL%GOBP%GO:0001101	0.00806297	0.0429262	1	FYN,PKD2,ATP2B4,MTOR,RPTOR	1.66147	0.590612	5	21
ENDOPLASMIC RETICULUM STRESS RESPONSE IN CORONAVIRUS INFECTION%WIKIPATHWAYS_20220510%WP4861%HOMO SAPIENS	ENDOPLASMIC RETICULUM STRESS RESPONSE IN CORONAVIRUS INFECTION%WIKIPATHWAYS_20220510%WP4861%HOMO SAPIENS	0.00807621	0.0429262	-1	PPP1R1A,PPP1CC,PPP1R13B,PPP1R3D,EIF2AK2,EIF2S1,PPP1R1C,PPP1R7	-1.68656	-0.583866	8	22
POSITIVE REGULATION OF SMALL MOLECULE METABOLIC PROCESS%GOBP%GO:0062013	POSITIVE REGULATION OF SMALL MOLECULE METABOLIC PROCESS%GOBP%GO:0062013	0.00807815	0.0429262	1	IGF2,SNCA,PRKAA2,MTOR,RPTOR,APOA4,CD74,INSR,SLC4A4,ZBTB20,LPGAT1,PSEN1,APP,PTPN2,APOE,SORBS1,PRKAA1,FGF1,NOS3,ABCD2,MLYCD	1.60554	0.487414	21	43
POSITIVE REGULATION OF OSSIFICATION%GOBP%GO:0045778	POSITIVE REGULATION OF OSSIFICATION%GOBP%GO:0045778	0.00807848	0.0429262	1	TGFB2,TGFB1,TMEM119,PTN,TGFB3,FBN2,ATP2B1,ANO6,PTPN11,RXRB	1.71349	0.64393	10	17
RND1 GTPASE CYCLE%REACTOME DATABASE ID RELEASE 81%9696273	RND1 GTPASE CYCLE%REACTOME DATABASE ID RELEASE 81%9696273	0.00811908	0.0429262	1	PLXNA1,ALDH3A2,CAV1,DST,KIDINS220,RRAS2,FLOT2,ARHGAP35	1.65829	0.585113	8	22
STEROID BIOSYNTHESIS%PATHWHIZ%PW000050	STEROID BIOSYNTHESIS%PATHWHIZ%PW000050	0.00817439	0.0429262	-1	PMVK,MVD,HMGCR,GGPS1,MVK,FDPS,IDI1	-1.68931	-0.647509	7	15
SMITH-LEMLI-OPITZ SYNDROME (SLOS)%PATHWHIZ%PW000095	SMITH-LEMLI-OPITZ SYNDROME (SLOS)%PATHWHIZ%PW000095	0.00817439	0.0429262	-1	PMVK,MVD,HMGCR,GGPS1,MVK,FDPS,IDI1	-1.68931	-0.647509	7	15
CHILD SYNDROME%PATHWHIZ%PW000096	CHILD SYNDROME%PATHWHIZ%PW000096	0.00817439	0.0429262	-1	PMVK,MVD,HMGCR,GGPS1,MVK,FDPS,IDI1	-1.68931	-0.647509	7	15
DESMOSTEROLOSIS%PATHWHIZ%PW000097	DESMOSTEROLOSIS%PATHWHIZ%PW000097	0.00817439	0.0429262	-1	PMVK,MVD,HMGCR,GGPS1,MVK,FDPS,IDI1	-1.68931	-0.647509	7	15
CHONDRODYSPLASIA PUNCTATA II, X-LINKED DOMINANT (CDPX2)%SMPDB%SMP0000388	CHONDRODYSPLASIA PUNCTATA II, X-LINKED DOMINANT (CDPX2)%SMPDB%SMP0000388	0.00817439	0.0429262	-1	PMVK,MVD,HMGCR,GGPS1,MVK,FDPS,IDI1	-1.68931	-0.647509	7	15
LYSOSOMAL ACID LIPASE DEFICIENCY (WOLMAN DISEASE)%PATHWHIZ%PW000099	LYSOSOMAL ACID LIPASE DEFICIENCY (WOLMAN DISEASE)%PATHWHIZ%PW000099	0.00817439	0.0429262	-1	PMVK,MVD,HMGCR,GGPS1,MVK,FDPS,IDI1	-1.68931	-0.647509	7	15
IBANDRONATE ACTION PATHWAY%SMPDB%SMP0000079	IBANDRONATE ACTION PATHWAY%SMPDB%SMP0000079	0.00817439	0.0429262	-1	PMVK,MVD,HMGCR,GGPS1,MVK,FDPS,IDI1	-1.68931	-0.647509	7	15
SIMVASTATIN ACTION PATHWAY%PATHWHIZ%PW000127	SIMVASTATIN ACTION PATHWAY%PATHWHIZ%PW000127	0.00817439	0.0429262	-1	PMVK,MVD,HMGCR,GGPS1,MVK,FDPS,IDI1	-1.68931	-0.647509	7	15
PRAVASTATIN ACTION PATHWAY%SMPDB%SMP0000089	PRAVASTATIN ACTION PATHWAY%SMPDB%SMP0000089	0.00817439	0.0429262	-1	PMVK,MVD,HMGCR,GGPS1,MVK,FDPS,IDI1	-1.68931	-0.647509	7	15
ROSUVASTATIN ACTION PATHWAY%SMPDB%SMP0000092	ROSUVASTATIN ACTION PATHWAY%SMPDB%SMP0000092	0.00817439	0.0429262	-1	PMVK,MVD,HMGCR,GGPS1,MVK,FDPS,IDI1	-1.68931	-0.647509	7	15
ALENDRONATE ACTION PATHWAY%PATHWHIZ%PW000137	ALENDRONATE ACTION PATHWAY%PATHWHIZ%PW000137	0.00817439	0.0429262	-1	PMVK,MVD,HMGCR,GGPS1,MVK,FDPS,IDI1	-1.68931	-0.647509	7	15
HYPERCHOLESTEROLEMIA%PATHWHIZ%PW000221	HYPERCHOLESTEROLEMIA%PATHWHIZ%PW000221	0.00817439	0.0429262	-1	PMVK,MVD,HMGCR,GGPS1,MVK,FDPS,IDI1	-1.68931	-0.647509	7	15
LOVASTATIN ACTION PATHWAY%SMPDB%SMP0000099	LOVASTATIN ACTION PATHWAY%SMPDB%SMP0000099	0.00817439	0.0429262	-1	PMVK,MVD,HMGCR,GGPS1,MVK,FDPS,IDI1	-1.68931	-0.647509	7	15
ZOLEDRONATE ACTION PATHWAY%PATHWHIZ%PW000270	ZOLEDRONATE ACTION PATHWAY%PATHWHIZ%PW000270	0.00817439	0.0429262	-1	PMVK,MVD,HMGCR,GGPS1,MVK,FDPS,IDI1	-1.68931	-0.647509	7	15
CERIVASTATIN ACTION PATHWAY%PATHWHIZ%PW000271	CERIVASTATIN ACTION PATHWAY%PATHWHIZ%PW000271	0.00817439	0.0429262	-1	PMVK,MVD,HMGCR,GGPS1,MVK,FDPS,IDI1	-1.68931	-0.647509	7	15
RISEDRONATE ACTION PATHWAY%PATHWHIZ%PW000272	RISEDRONATE ACTION PATHWAY%PATHWHIZ%PW000272	0.00817439	0.0429262	-1	PMVK,MVD,HMGCR,GGPS1,MVK,FDPS,IDI1	-1.68931	-0.647509	7	15
PAMIDRONATE ACTION PATHWAY%PATHWHIZ%PW000273	PAMIDRONATE ACTION PATHWAY%PATHWHIZ%PW000273	0.00817439	0.0429262	-1	PMVK,MVD,HMGCR,GGPS1,MVK,FDPS,IDI1	-1.68931	-0.647509	7	15
FLUVASTATIN ACTION PATHWAY%PATHWHIZ%PW000274	FLUVASTATIN ACTION PATHWAY%PATHWHIZ%PW000274	0.00817439	0.0429262	-1	PMVK,MVD,HMGCR,GGPS1,MVK,FDPS,IDI1	-1.68931	-0.647509	7	15
ATORVASTATIN ACTION PATHWAY%SMPDB%SMP0000131	ATORVASTATIN ACTION PATHWAY%SMPDB%SMP0000131	0.00817439	0.0429262	-1	PMVK,MVD,HMGCR,GGPS1,MVK,FDPS,IDI1	-1.68931	-0.647509	7	15
CHOLESTERYL ESTER STORAGE DISEASE%SMPDB%SMP0000508	CHOLESTERYL ESTER STORAGE DISEASE%SMPDB%SMP0000508	0.00817439	0.0429262	-1	PMVK,MVD,HMGCR,GGPS1,MVK,FDPS,IDI1	-1.68931	-0.647509	7	15
HYPER-IGD SYNDROME%SMPDB%SMP0000509	HYPER-IGD SYNDROME%SMPDB%SMP0000509	0.00817439	0.0429262	-1	PMVK,MVD,HMGCR,GGPS1,MVK,FDPS,IDI1	-1.68931	-0.647509	7	15
MEVALONIC ACIDURIA%SMPDB%SMP0000510	MEVALONIC ACIDURIA%SMPDB%SMP0000510	0.00817439	0.0429262	-1	PMVK,MVD,HMGCR,GGPS1,MVK,FDPS,IDI1	-1.68931	-0.647509	7	15
WOLMAN DISEASE%PATHWHIZ%PW000487	WOLMAN DISEASE%PATHWHIZ%PW000487	0.00817439	0.0429262	-1	PMVK,MVD,HMGCR,GGPS1,MVK,FDPS,IDI1	-1.68931	-0.647509	7	15
PROCESSING OF DNA DOUBLE-STRAND BREAK ENDS%REACTOME DATABASE ID RELEASE 81%5693607	PROCESSING OF DNA DOUBLE-STRAND BREAK ENDS%REACTOME DATABASE ID RELEASE 81%5693607	0.00834202	0.0437495	-1	UBE2N,CDK2,UBE2V2,PPP4C,SUMO2,TP53BP1,PPP4R2	-1.67525	-0.596349	7	20
REGULATION OF PROTEIN PHOSPHORYLATION%GOBP%GO:0001932	REGULATION OF PROTEIN PHOSPHORYLATION%GOBP%GO:0001932	0.00835929	0.0437831	1	HEG1,THBS4,TGFB2,DMD,FYN,TGFB1,RAP2B,IGFBP3,INHBE,PKD2,SLC9A3R1,ITGB3,TPD52L1,EMILIN1,CAV1,HBEGF,ATP2B4,PRKAG1,IGF2,PIBF1,DLG3,ADAM17,RARRES2,SNCA,TAOK3,DOCK7,TMEM119,NRP1,MTOR,PDGFRB,SMCR8,THY1,RPTOR,ENPP1,CACUL1,MYADM,CD74,CORO1C,INSR,ACE,RELN,DMTN,CBL,HLA-DRB1,NPTN,CD44,HRG,PLXNB2,FMR1,FLOT1,TGFB3,RB1CC1,GNAQ,HGS,TLR3,RALBP1,PTPN11,AKAP9,CCND2,APP,RHOA,PTPN2,APOE,DAB2IP,RALB,GPNMB,ACTB,FERMT2,…	1.33086	0.301957	102	315
REGULATION OF BIOLOGICAL PROCESS INVOLVED IN SYMBIOTIC INTERACTION%GOBP%GO:0043903	REGULATION OF BIOLOGICAL PROCESS INVOLVED IN SYMBIOTIC INTERACTION%GOBP%GO:0043903	0.00844206	0.0441415	1	CAV1,EXOC2,ITGAV,CD74,HLA-DRB1,GSN,TRIM22,EXOC7,APCS,TRIM26	1.65867	0.577815	10	23
PLASMA MEMBRANE ORGANIZATION%GOBP%GO:0007009	PLASMA MEMBRANE ORGANIZATION%GOBP%GO:0007009	0.00844967	0.0441415	1	MYOF,STX4,SLC9A3R1,CAV1,SPTBN1,DYSF,CAV2,COL5A1,CD9,SERPINA5,SNX18,FLOT1,ANXA6,NSF,ANO6,PACSIN3,OSBPL2,COLEC12,MYH9,ABCD2,CHMP5,BIN1,CLU	1.57064	0.452327	23	56
MEMBRANE DOCKING%GOBP%GO:0022406	MEMBRANE DOCKING%GOBP%GO:0022406	0.00846055	0.0441415	1	STX4,CAV2,EXOC2,RAB8B,STX3,STX16,STX1A,ROCK1,RAB10,VAMP3,EXOC7,UNC13B,EXOC3,RAB8A,STX12,STX7,STX11,PEX16,STX10,PDZD8,VPS18,EXOC6B,EXOC5,EXOC4,EXOC1,SNAP29,STX2,PACS2,VTI1B,RAB13	1.56284	0.45151	30	55
POSITIVE REGULATION OF BIOMINERAL TISSUE DEVELOPMENT%GOBP%GO:0070169	POSITIVE REGULATION OF BIOMINERAL TISSUE DEVELOPMENT%GOBP%GO:0070169	0.00860256	0.0447666	1	TGFB1,TMEM119,PTN,TGFB3,FBN2,ATP2B1,ANO6,RXRB	1.71031	0.662463	8	15
POSITIVE REGULATION OF BIOMINERALIZATION%GOBP%GO:0110151	POSITIVE REGULATION OF BIOMINERALIZATION%GOBP%GO:0110151	0.00860256	0.0447666	1	TGFB1,TMEM119,PTN,TGFB3,FBN2,ATP2B1,ANO6,RXRB	1.71031	0.662463	8	15
CELLULAR RESPONSE TO TRANSFORMING GROWTH FACTOR BETA STIMULUS%GOBP%GO:0071560	CELLULAR RESPONSE TO TRANSFORMING GROWTH FACTOR BETA STIMULUS%GOBP%GO:0071560	0.00867597	0.0450905	1	TGFB2,TGFB1,CILP,LTBP2,FMOD,CLEC3B,ITGB5,COL3A1,ANKRD1,COL1A2,SMAD2,PXN,ITGB1,TGFB3,TGFBRAP1,LIMS1	1.60204	0.489204	16	42
GAMMA CARBOXYLATION, HYPUSINE FORMATION AND ARYLSULFATASE ACTIVATION%REACTOME DATABASE ID RELEASE 81%163841	GAMMA CARBOXYLATION, HYPUSINE FORMATION AND ARYLSULFATASE ACTIVATION%REACTOME DATABASE ID RELEASE 81%163841	0.00869745	0.0451376	-1	F8,DPH6,GGCX,DNAJC24,EIF5A2,DHPS,EEF2,EIF5A,ARSB	-1.6748	-0.579795	9	22
ENDODERMAL CELL DIFFERENTIATION%GOBP%GO:0035987	ENDODERMAL CELL DIFFERENTIATION%GOBP%GO:0035987	0.00870743	0.0451376	1	COL12A1,COL4A2,COL6A1,ITGB5,COL8A1,ITGAV,LAMA3,ITGA7,CDC73	1.67611	0.612116	9	19
EGFR1%IOB%EGFR1	EGFR1%IOB%EGFR1	0.00879418	0.0455243	1	ACTN1,ITGB4,EPHB4,FYN,DCBLD2,CRIM1,MAGI1,SLC25A6,ADAM17,SNCA,CAV2,PTPRA,PRKAA2,FLOT2,CALD1,MTOR,PHLDB2,PDLIM4,PYGB,BAD,INSR,ARHGAP35,TLN1,SMAD2,ACTN4,ANXA2,CBL,SLC12A7,ANXA4,STAT5B,PXN,ZFYVE16,ITGB1,FLOT1,KIAA1217,HGS,ACTR3,RALBP1,SCRIB,PIK3C2B,PTPN11,APP,AHNAK,SHB,RALB,ACTR2,VAV2,ARAP1,PEAK1,PLEC,NCK1,PRKAA1,REPS2,EGFR,TYK2,MYH9,SNRPD2,NCK2,RAF1,PTPRE,ELMO2,DOCK1,RPS27L,ACTA2,PKN2,WASL,USP31,MYO…	1.37646	0.323253	77	226
POSITIVE REGULATION OF CELL POPULATION PROLIFERATION%GOBP%GO:0008284	POSITIVE REGULATION OF CELL POPULATION PROLIFERATION%GOBP%GO:0008284	0.00880461	0.0455243	1	IGF1R,CD55,RTN4,IGFBP5,THBS4,EGFL7,TGFB2,S100A6,TNFSF12,TJP1,STX4,CD46,TGFB1,NOTCH2,ITGB3,TRPM4,HBEGF,IGF2,ADAM17,CLEC11A,TMEM119,NRP1,GNAI2,PDGFRB,ITGAV,CDK4,BAD,PTN,LTBP3,CACUL1,STX3,CD74,INSR,ECM1,GJA1,MECP2,PDCD6,MEF2D,S100A13,NES,TCIRG1,TGFB3,TBRG4,CUL3,HLA-DPA1,CCND2,SLC35F6,ACTB,SRPK2,GAB2,FERMT2,FZD7,NCK1,CSNK2A1,PRKD2,HDAC2,EGFR,TYK2,SLC25A5,RHOG,FGF1,CHRD,CD81,NCK2,PTK2,CNOT7	1.37178	0.322518	66	224
NEGATIVE REGULATION OF LOCOMOTION%GOBP%GO:0040013	NEGATIVE REGULATION OF LOCOMOTION%GOBP%GO:0040013	0.00888257	0.0458686	1	DAG1,IGFBP5,SEMA3D,DPYSL3,TGFB1,RAP2B,IGFBP3,RECK,EMILIN1,ATP2B4,SEMA5B,COL3A1,CDH11,DCN,PHLDB2,THY1,PODN,SEMA3C,CD74,CORO1C,GJA1,MECP2,FRMD5,HRG,PTPN23,CORO1B,VCL,RHOA,PTPN2,APOE,DAB2IP,PTPRM	1.46497	0.373858	32	117
VIRAL BUDDING%GOBP%GO:0046755	VIRAL BUDDING%GOBP%GO:0046755	0.00897142	0.0462682	-1	LRSAM1,CHMP2B,CHMP2A,VPS4A,CHMP7,VPS37A,NEDD4,VTA1,CHMP1B,MVB12A,CHMP3,TSG101	-1.68082	-0.591229	12	21
ENDOCHONDRAL OSSIFICATION%WIKIPATHWAYS_20220510%WP474%HOMO SAPIENS	ENDOCHONDRAL OSSIFICATION%WIKIPATHWAYS_20220510%WP474%HOMO SAPIENS	0.00902458	0.0464236	1	IGF1R,TGFB1,IGF2,ENPP1,MGP,STAT5B,ADAMTS4,PLAT	1.70831	0.652011	8	16
ENDOCHONDRAL OSSIFICATION WITH SKELETAL DYSPLASIAS%WIKIPATHWAYS_20220510%WP4808%HOMO SAPIENS	ENDOCHONDRAL OSSIFICATION WITH SKELETAL DYSPLASIAS%WIKIPATHWAYS_20220510%WP4808%HOMO SAPIENS	0.00902458	0.0464236	1	IGF1R,TGFB1,IGF2,ENPP1,MGP,STAT5B,ADAMTS4,PLAT	1.70831	0.652011	8	16
DETOXIFICATION OF REACTIVE OXYGEN SPECIES%REACTOME DATABASE ID RELEASE 81%3299685	DETOXIFICATION OF REACTIVE OXYGEN SPECIES%REACTOME DATABASE ID RELEASE 81%3299685	0.00918964	0.0471524	-1	TXNRD1,PRDX6,GSTP1,NCF2,PRDX1,TXNRD2,TXN,TXN2	-1.64304	-0.556979	8	24
TRNA AMINOACYLATION%REACTOME DATABASE ID RELEASE 81%379724	TRNA AMINOACYLATION%REACTOME DATABASE ID RELEASE 81%379724	0.00918964	0.0471524	-1	RARS2,EEF1E1,FARSB,CARS2,PPA2,AIMP2,PPA1,AIMP1,LARS2,FARS2,PARS2,NARS2	-1.648	-0.558659	12	24
RESPONSE TO PEPTIDE%GOBP%GO:1901652	RESPONSE TO PEPTIDE%GOBP%GO:1901652	0.00922804	0.0472893	1	IGF1R,IGFBP5,FYN,CACNA2D1,RAB31,CAV1,IGF2,GNAI1,RARRES2,CAV2,ENPP1,VIM,INSR,GJA1,ROCK1,CAMK2A,SORT1,STAT5B,PXN,SLC2A1,RAB10,SLC2A4,EIF2B5,PSEN1,APP,PTPN2,STAT4,SORBS1,RAB8A,ATP1A3,PRKDC,TYK2,LPIN3,PTK2,ARHGEF2	1.46274	0.372719	35	118
INTRA-GOLGI TRAFFIC%REACTOME%R-HSA-6811438.1	INTRA-GOLGI TRAFFIC%REACTOME%R-HSA-6811438.1	0.00930674	0.0476321	1	GOLIM4,CYTH3,MAN2A2,VTI1A,COG5,STX16,VPS45,RAB33B,NSF,TRIP11,COG7,MAN1A2	1.63198	0.527364	12	32
NEGATIVE REGULATION OF TRANSPORT%GOBP%GO:0051051	NEGATIVE REGULATION OF TRANSPORT%GOBP%GO:0051051	0.00961707	0.049158	1	RHBDF1,ARHGAP1,APOC1,PKD2,ITGB3,CAV1,EPHA3,TRDN,RAB23,DYSF,PPP3CC,SNCA,ATP9A,ITGAV,SMCR8,ENPP1,PLN,RAP1B,CD74,GJA1,DMTN,ANXA2,RAB11FIP5,ISCU,FMR1,RAB33B,VAMP3,PSEN1,PACSIN3,APP,APOE,ANKRD13D,VDAC1	1.41378	0.348733	33	148
REGULATION OF SUBSTRATE ADHESION-DEPENDENT CELL SPREADING%GOBP%GO:1900024	REGULATION OF SUBSTRATE ADHESION-DEPENDENT CELL SPREADING%GOBP%GO:1900024	0.00963537	0.0491892	1	FLNA,NRP1,MYADM,CORO1C,ACTN4,DMTN,LIMS1,TRIOBP,FERMT2,GBP1,ILK,DOCK5,PTK2,DOCK1,MYOC,FGG,FGB,FGA	1.61319	0.512425	18	35
ALPHA-AMINO ACID BIOSYNTHETIC PROCESS%GOBP%GO:1901607	ALPHA-AMINO ACID BIOSYNTHETIC PROCESS%GOBP%GO:1901607	0.00970669	0.0494906	-1	SEPHS1,GLUD2,MTHFR,SHMT1,AASDHPPT,GLUL,ASL,BCAT2,GOT1,ADI1,ASS1,AASS,MRI1	-1.63403	-0.519789	13	31
PROTEASOME-MEDIATED UBIQUITIN-DEPENDENT PROTEIN CATABOLIC PROCESS%GOBP%GO:0043161	PROTEASOME-MEDIATED UBIQUITIN-DEPENDENT PROTEIN CATABOLIC PROCESS%GOBP%GO:0043161	0.00990099	0.0504175	-1	DERL1,PSMA4,PCNP,UBE2G1,ASB2,ADRM1,PSMD14,PSMB6,UBE2K,PSMA1,PSMB3,PSMA7,PSMB4,PSMC2,PSMB7,SHARPIN,PSMA6,UBXN2B,SIRT2,PSMB2,PSMA2,PSMD7,AMN1,GSK3A,PSMA3,NEDD4L,FAF1,UBE2B,FBXL18,CUL4B,PSMC1,CLGN,ARMC8,NEDD4,CUL2,UBR3,CALR,RBCK1,UBXN1,WDR26,DCAF11,PPP2R5C	-1.38646	-0.32649	42	164
BRANCHED-CHAIN AMINO ACID METABOLIC PROCESS%GOBP%GO:0009081	BRANCHED-CHAIN AMINO ACID METABOLIC PROCESS%GOBP%GO:0009081	0.00993995	0.050447	-1	ALDH6A1,ACAT1,BCKDHB,MCCC2,BCAT2,ECHS1,HIBADH,PCCB,BCKDHA	-1.66522	-0.576479	9	22
RELEASE OF SEQUESTERED CALCIUM ION INTO CYTOSOL%GOBP%GO:0051209	RELEASE OF SEQUESTERED CALCIUM ION INTO CYTOSOL%GOBP%GO:0051209	0.00994074	0.050447	1	PKD2,FLNA,ITPR1,TRDN,PLCG2,ITPR2,GP1BB,RYR2,CHERP,RYR1	1.70041	0.658629	10	15
ION TRANSPORT BY P-TYPE ATPASES%REACTOME DATABASE ID RELEASE 81%936837	ION TRANSPORT BY P-TYPE ATPASES%REACTOME DATABASE ID RELEASE 81%936837	0.00996933	0.050447	1	ATP2A3,FXYD1,CAMK2G,ATP2B4,ATP9A,CAMK2B,PLN,CAMK2A,ATP2B1,ATP1B3,ATP1A3,CAMK2D,ATP11A,ATP1A2	1.66655	0.570439	14	25
PEPTIDYL-TYROSINE MODIFICATION%GOBP%GO:0018212	PEPTIDYL-TYROSINE MODIFICATION%GOBP%GO:0018212	0.00996933	0.050447	1	IGF1R,FYN,ABI1,EPHA3,PIBF1,PDGFRB,INSR,RELN,EFEMP1,EGFR,DDR1,PTK2,FLT1,FER	1.65679	0.567098	14	25
PEPTIDYL-TYROSINE PHOSPHORYLATION%GOBP%GO:0018108	PEPTIDYL-TYROSINE PHOSPHORYLATION%GOBP%GO:0018108	0.00996933	0.050447	1	IGF1R,FYN,ABI1,EPHA3,PIBF1,PDGFRB,INSR,RELN,EFEMP1,EGFR,DDR1,PTK2,FLT1,FER	1.65679	0.567098	14	25
SIGNALING BY VEGF%REACTOME DATABASE ID RELEASE 81%194138	SIGNALING BY VEGF%REACTOME DATABASE ID RELEASE 81%194138	0.010031	0.0506955	1	FYN,ABI1,ITGB3,CAV1,ITPR1,CYFIP1,NRP1,MTOR,ITGAV,ROCK1,PXN,RICTOR,RHOA,SHB,VAV2,NCK1,ITPR3,NCKAP1,NOS3,NCK2,PTK2,ELMO2,DOCK1,FLT1,MAPKAP1,PLCG1	1.51497	0.419331	26	70
CYTOSKELETON-DEPENDENT INTRACELLULAR TRANSPORT%GOBP%GO:0030705	CYTOSKELETON-DEPENDENT INTRACELLULAR TRANSPORT%GOBP%GO:0030705	0.0100557	0.0507566	1	FBXW11,MYO1D,BICD1,KIF13A,DST,NDE1,ACTN4,MYO1C,KIFAP3,SPG11,APP,TUBB,ARL8A,DYNC1H1,MAP1A,KIF3B,TUBA1A,RAB6A,AP3B1,IFT57,BLOC1S5,WASL,MYO6,AP3D1,HOOK2,HTT,RAB1A,PEX14,MYO1B,NEFL,BLOC1S2,STAU1,BAG3,TMEM201,KIF3A,KIF5B,RAB27B,ACTR10,AP3S1,CCDC88A,TRAK1,BLOC1S1,MYO1E,ARL8B,HSPA8,HOOK3,FYCO1,DCTN1	1.46724	0.385751	48	95
APOPTOSIS%REACTOME%R-HSA-109581.3	APOPTOSIS%REACTOME%R-HSA-109581.3	0.0101033	0.0509334	-1	PSME2,STAT3,PSMA4,PSME1,CD14,PSMD14,PSMB6,PSMA1,PSMB3,PSMA7,PSMB4,CASP6,PSMC2,PSMB7,PRKCD,PSMA6,PPP1R13B,NMT1,PSMB2,PSMA2,PSMD7,C1QBP,PSMB8,PSMA3,DAPK2,PAK2,PSMD5	-1.4201	-0.349117	27	121
BIOCARTA_AGR_PATHWAY%MSIGDB_C2%BIOCARTA_AGR_PATHWAY	BIOCARTA_AGR_PATHWAY%MSIGDB_C2%BIOCARTA_AGR_PATHWAY	0.0101319	0.0510137	1	DAG1,DMD,AGRN,LAMA3,ITGB1,LAMA4,EGFR,MAPK1	1.69635	0.657058	8	15
ENDODERM FORMATION%GOBP%GO:0001706	ENDODERM FORMATION%GOBP%GO:0001706	0.0101786	0.0511849	1	COL12A1,COL4A2,COL6A1,ITGB5,COL8A1,ITGAV,LAMA3,ITGA7,CDC73	1.66381	0.598839	9	20
TRANSMEMBRANE RECEPTOR PROTEIN SERINE/THREONINE KINASE SIGNALING PATHWAY%GOBP%GO:0007178	TRANSMEMBRANE RECEPTOR PROTEIN SERINE/THREONINE KINASE SIGNALING PATHWAY%GOBP%GO:0007178	0.0103734	0.0520478	1	TGFB2,TGFB1,INHBE,LTBP2,FMOD,ITGB5,COL3A1,COL1A2,SMAD2,PXN,ITGB1,TGFB3,TGFBRAP1,FERMT2,USP9X,CHRD,PTK2	1.57599	0.481249	17	42
PROTEASOME DEGRADATION%WIKIPATHWAYS_20220510%WP183%HOMO SAPIENS	PROTEASOME DEGRADATION%WIKIPATHWAYS_20220510%WP183%HOMO SAPIENS	0.0103792	0.0520478	-1	PSME2,PSMA4,PSMB6,PSMB3,PSMB2,PSMA2,PSMD7,PSMD5,UBE2B,PSMC1,NEDD4	-1.60158	-0.497119	11	34
RNA POLYMERASE II TRANSCRIPTION%REACTOME%R-HSA-73857.5	RNA POLYMERASE II TRANSCRIPTION%REACTOME%R-HSA-73857.5	0.0103889	0.0520478	-1	FKBP5,PSME2,LGALS3,TRIAP1,SMARCD3,PSMA4,TXNRD1,CDK6,POLDIP3,POLR2G,PSME1,TP53RK,SMARCE1,GPI,SKI,PSMD14,DEK,PSMB6,CCNT1,SNRPG,NELFCD,PSMA1,CHM,PAPOLA,RABGGTA,CDK2,PSMB3,PSMA7,CSTF1,PSMB4,ACTL6A,PPP2CA,WWTR1,CASP6,PSMC2,PRDX1,PSMB7,MED23,PIP4K2C,PSMA6,KRBA1,MAGOH,PPP2CB,RGCC,PPP1R13B,DDX39A,GAMT,SMARCB1,TXN,RABGGTB,PSMB2,PSMA2,PSMD7,TIGAR,NCBP2,CDC40,SNRPD3,POLR2H,SMAD4,MAPK14,PSMB8,PSMA3,NOTCH1,SN…	-1.24982	-0.266217	164	431
GLYCOLYSIS%BIOCYC%PWY66-400	GLYCOLYSIS%BIOCYC%PWY66-400	0.0104275	0.0520574	-1	ENO3,HK3,GPI,ALDOC,ALDOA,PFKM,ENO1,PGAM2,TPI1	-1.64842	-0.586797	9	20
REGULATION OF TRANSMEMBRANE TRANSPORTER ACTIVITY%GOBP%GO:0022898	REGULATION OF TRANSMEMBRANE TRANSPORTER ACTIVITY%GOBP%GO:0022898	0.0104279	0.0520574	1	DMD,CACNA2D1,UTRN,PKD2,FXYD1,SLC9A3R1,CAV1,TRDN,JPH2,SLC9A1,PPP3CC,SNCA,SLMAP,HOMER1,PLN,RELN,ACTN4,ITGB1,FMR1,ATP1B3,AKAP9,APP,AHNAK,ACTB,DLG1,STIM1,ACE2,NPPA,FHL1,YWHAH,CAMK2D,HRC	1.4763	0.390983	32	90
REGULATION OF ACTIN FILAMENT ORGANIZATION%GOBP%GO:0110053	REGULATION OF ACTIN FILAMENT ORGANIZATION%GOBP%GO:0110053	0.0104296	0.0520574	1	SYNPO2L,TJP1,CTTN,DBNL,SVIL,FCHSD2,SLC9A1,ESAM,CYFIP1,NRP1,PHLDB2,DBN1,MYADM,ARHGAP35,LIMA1,ROCK1,GSN,PXN,CDC42EP1,TGFB3,LMOD2,STMN1,SSH3,CORO1B,SYNPO,RHOA,SORBS3,TRIOBP,PPFIA1,ARAP1,FERMT2,NCK1,NCKAP1,ACTG1,SYNPO2,NCK2,CLASP1,MYOC,BIN1,CXCL12,FER,ARF6,VASP,CDC42EP3,INPPL1,LMOD1	1.43929	0.36089	46	131
RHO GTPASES ACTIVATE ROCKS%REACTOME DATABASE ID RELEASE 81%5627117	RHO GTPASES ACTIVATE ROCKS%REACTOME DATABASE ID RELEASE 81%5627117	0.0105142	0.0523561	1	MYH10,MYH11,ROCK1,RHOA,PPP1R12A,MYL6,MYH9,MYH14,ROCK2,MYL9	1.6906	0.654829	10	15
HETEROTRIMERIC G-PROTEIN SIGNALING PATHWAY-GQ ALPHA AND GO ALPHA MEDIATED PATHWAY%PANTHER PATHWAY%P00027	HETEROTRIMERIC G-PROTEIN SIGNALING PATHWAY-GQ ALPHA AND GO ALPHA MEDIATED PATHWAY%PANTHER PATHWAY%P00027	0.0105283	0.0523561	1	PLCB4,GNAO1,GNA14,ITPR1,RAP1B,GNA11,GNAQ,RHOA,ITPR3	1.63375	0.540403	9	29
DETECTION OF STIMULUS%GOBP%GO:0051606	DETECTION OF STIMULUS%GOBP%GO:0051606	0.0105283	0.0523561	1	ANO1,PGLYRP2,PKD2,SSC5D,FAP,GNA11,PIEZO1,HLA-DRB1,TGFB3,GNAQ,STIM1,PTK2,TTN,CADM1,CSRP3,RYR2,CTNNB1,CDH2,PITPNM1,HLA-A	1.63577	0.541074	20	29
NEGATIVE REGULATION OF SEQUESTERING OF CALCIUM ION%GOBP%GO:0051283	NEGATIVE REGULATION OF SEQUESTERING OF CALCIUM ION%GOBP%GO:0051283	0.0105607	0.0524522	1	PKD2,FLNA,ITPR1,TRDN,ANXA6,PLCG2,ITPR2,GP1BB,RYR2,CHERP,RYR1	1.68478	0.643033	11	16
RRNA PROCESSING%GOBP%GO:0006364	RRNA PROCESSING%GOBP%GO:0006364	0.010694	0.0530489	-1	PIN4,PIH1D1,NOL9,WDR36,DDX47,UTP15,TRMT112,RPS16,RPS7,METTL5,TFB1M,EXOSC3,MDN1,RPS17,NOP2,XRN2,MRTO4,TSR2,RPS24,RRS1,BMS1,RPS27,UTP6,EXOSC9,RPS21,FBL,RPS15,EXOSC7,DDX49,EXOSC10,DDX18,ERI3,RPS19,RRP9,EIF6,WDR12,NIFK,NOL6,RPL5,RPS28,HEATR1,TFB2M,NOL11,TSR3,NOP9,RPL35A,RRP1,RPL11,RRP12,EMG1,RPL10A,NSUN4,RPL27	-1.43888	-0.36259	53	101
MACROMOLECULE METHYLATION%GOBP%GO:0043414	MACROMOLECULE METHYLATION%GOBP%GO:0043414	0.0107479	0.0532508	-1	TRMT6,SNRPG,PRMT3,TRMT1,WDR6,SMYD3,TRMT112,METTL5,TFB1M,SNRPD3,DMAP1,NTMT1,TRMT61B,PICK1,SNRPF,GSPT1,MEPCE,NOP2,OGT,METTL2A,PLD6,ETF1,LCMT1,NFYC,THUMPD3,DPY30,NSUN6,SNRPE,CTR9	-1.47331	-0.38191	29	84
POSITIVE REGULATION OF TRANSPORT%GOBP%GO:0051050	POSITIVE REGULATION OF TRANSPORT%GOBP%GO:0051050	0.0108126	0.0535057	1	C1QTNF3,TGFB2,COLEC10,CFP,DMD,BICD1,ANO1,FYN,STX4,MYH10,TGFB1,CACNA2D1,PKD2,FXYD1,RAB31,CADPS,CAV1,MCU,TRPM4,FLNA,TRDN,JPH2,SLC9A1,TMEM30A,PPP3CC,SNCA,SIRPB1,PDGFRB,GLUD1,ANKRD1,HIP1,THY1,BAD,MAP2,CSNK2A2,STAM,INSR,STX1A,RELN,ACTN4,MYO1C,ANXA2,CBL,HLA-DRB1,CAMK2A,TOR1A,MYLK,ITGB1,PTPN23,BCAP31,FMR1,FLOT1,TGFB3,MYO18A,ATP2B1,HGS,ANO6,PTPN11,PSEN1,ATP1B3,AKAP9,APOE,ORAI1,DYNC1H1,ACTB,GAB2,UNC13B,LM…	1.3212	0.299931	93	312
SEMA4D INDUCED CELL MIGRATION AND GROWTH-CONE COLLAPSE%REACTOME DATABASE ID RELEASE 81%416572	SEMA4D INDUCED CELL MIGRATION AND GROWTH-CONE COLLAPSE%REACTOME DATABASE ID RELEASE 81%416572	0.0108966	0.0538553	1	MYH10,MYH11,ARHGEF12,ROCK1,RHOA,MYL6,MYH9,ARHGEF11,MYH14,ROCK2,MYL9	1.68257	0.651718	11	15
ORGANIC HYDROXY COMPOUND BIOSYNTHETIC PROCESS%GOBP%GO:1901617	ORGANIC HYDROXY COMPOUND BIOSYNTHETIC PROCESS%GOBP%GO:1901617	0.0110059	0.0543292	-1	PMVK,PCK2,ITPKB,MVD,HMGCR,OSBPL1A,MVK,PARK7,AKR1D1,GBA,GOT1,PGP,ACAA2,CYP7B1,ACOT8,SCP2,ASAH1,QDPR	-1.51308	-0.421091	18	57
GLUTATHIONE CONJUGATION%REACTOME DATABASE ID RELEASE 81%156590	GLUTATHIONE CONJUGATION%REACTOME DATABASE ID RELEASE 81%156590	0.0110647	0.0545526	-1	MGST1,GCLM,GSTP1,GGCT,GSTM2,GSS,GSTM4,CNDP2,GSTT2B	-1.64095	-0.562214	9	23
HOMOLOGY DIRECTED REPAIR%REACTOME DATABASE ID RELEASE 81%5693538	HOMOLOGY DIRECTED REPAIR%REACTOME DATABASE ID RELEASE 81%5693538	0.0111814	0.0550607	-1	UBE2N,CDK2,ERCC1,UBE2V2,PPP4C,SUMO2,TP53BP1,PPP4R2	-1.62132	-0.528744	8	28
TGF-BETA RECEPTOR SIGNALING ACTIVATES SMADS%REACTOME%R-HSA-2173789.4	TGF-BETA RECEPTOR SIGNALING ACTIVATES SMADS%REACTOME%R-HSA-2173789.4	0.0114047	0.0560232	1	TGFB2,TGFB1,LTBP1,LTBP2,ITGB3,ITGB5,LTBP4,ITGAV,LTBP3,SMAD2,CBL,ITGB1,TGFB3	1.65892	0.555814	13	27
DENDRITE DEVELOPMENT%GOBP%GO:0016358	DENDRITE DEVELOPMENT%GOBP%GO:0016358	0.0114047	0.0560232	1	SDC2,FARP1,NRP1,PTN,MAP2,CAMK2A,APP,MAP1A,IQSEC1,HDAC2,TAOK2,WASL	1.65911	0.555878	12	27
CELL CYCLE PHASE TRANSITION%GOBP%GO:0044770	CELL CYCLE PHASE TRANSITION%GOBP%GO:0044770	0.0114462	0.0561587	-1	CLASP2,AKAP8L,CDK6,EIF4E,ARPP19,PPME1,CHMP2A,CDK17,CDK2,AKAP8,CDK18,RPS6KB1,PPP6C,CHMP7,GSPT1,PPP2R2D,CUL4B,ZPR1,LCMT1,CUL2	-1.51042	-0.42035	20	57
REGULATION OF NITRIC OXIDE BIOSYNTHETIC PROCESS%GOBP%GO:0045428	REGULATION OF NITRIC OXIDE BIOSYNTHETIC PROCESS%GOBP%GO:0045428	0.0115987	0.0567368	1	HBB,PKD2,CAV1,ATP2B4,DDAH1,PTGIS,INSR	1.62792	0.574395	7	22
REGULATION OF NITRIC OXIDE METABOLIC PROCESS%GOBP%GO:0080164	REGULATION OF NITRIC OXIDE METABOLIC PROCESS%GOBP%GO:0080164	0.0115987	0.0567368	1	HBB,PKD2,CAV1,ATP2B4,DDAH1,PTGIS,INSR	1.62792	0.574395	7	22
BLOOD COAGULATION%GOBP%GO:0007596	BLOOD COAGULATION%GOBP%GO:0007596	0.0116597	0.0567368	1	HBB,ENTPD1,ACTN1,RAP2B,ITGB3,FLNA,PF4,COL3A1,F11,F13B,CD9,TLN1,HRG,CSRP1,GNAS,VKORC1,GNAQ,ANO6,VCL,ACTB,VAV2,PLAT,ILK,ACTG1,MYH9,FGG,MYL12A,PLCG2	1.50706	0.414582	28	72
NONCANONICAL WNT SIGNALING PATHWAY%PATHWAY INTERACTION DATABASE NCI-NATURE CURATED DATA%NONCANONICAL WNT SIGNALING PATHWAY	NONCANONICAL WNT SIGNALING PATHWAY%PATHWAY INTERACTION DATABASE NCI-NATURE CURATED DATA%NONCANONICAL WNT SIGNALING PATHWAY	0.0116613	0.0567368	1	FLNA,DAAM1,ROCK1,CAMK2A,CSNK1A1,RHOA,FZD7	1.67437	0.648542	7	15
COAGULATION%GOBP%GO:0050817	COAGULATION%GOBP%GO:0050817	0.0116703	0.0567368	1	HBB,ENTPD1,ACTN1,RAP2B,ITGB3,FLNA,PF4,COL3A1,F11,F13B,CD9,TLN1,HRG,CSRP1,GNAS,VKORC1,GNAQ,ANO6,VCL,ACTB,VAV2,PLAT,ILK,ACTG1,MYH9,FGG,MYL12A,PLCG2	1.50729	0.413752	28	73
STEROL METABOLIC PROCESS%GOBP%GO:0016125	STEROL METABOLIC PROCESS%GOBP%GO:0016125	0.0116798	0.0567368	-1	PMVK,MVD,HMGCR,SCARF1,OSBPL1A,MVK,FDX1,AKR1D1,GBA,ACAA2,CYP7B1	-1.58056	-0.488375	11	35
NUCLEAR TRANSPORT%GOBP%GO:0051169	NUCLEAR TRANSPORT%GOBP%GO:0051169	0.0116812	0.0567368	-1	KPNA2,STAT3,POLDIP3,NUP43,DDX19B,RANGRF,MAGOH,DDX39A,DDX19A,NCBP2,TNPO3,CSE1L,NUTF2,AGFG1,NUP155,SSB,PCID2,CASC3,ABCE1,RPL23,CALR,RRS1,KPNA3,THOC3,SNUPN,SRSF3,TSC2,PHB2,ENY2,NUP50,NXF1,RPS15,IPO11,CDKN1B,RANBP3,THOC6,PABPN1,KPNA6,NUP160,NCBP1,XPOT,RANGAP1,APPL2,EIF6,NUP37,NUP35,NUP153,NUP85,IWS1,NPM1,HNRNPA1,NOL6	-1.39112	-0.3397	52	126
NUCLEOCYTOPLASMIC TRANSPORT%GOBP%GO:0006913	NUCLEOCYTOPLASMIC TRANSPORT%GOBP%GO:0006913	0.0116812	0.0567368	-1	KPNA2,STAT3,POLDIP3,NUP43,DDX19B,RANGRF,MAGOH,DDX39A,DDX19A,NCBP2,TNPO3,CSE1L,NUTF2,AGFG1,NUP155,SSB,PCID2,CASC3,ABCE1,RPL23,CALR,RRS1,KPNA3,THOC3,SNUPN,SRSF3,TSC2,PHB2,ENY2,NUP50,NXF1,RPS15,IPO11,CDKN1B,RANBP3,THOC6,PABPN1,KPNA6,NUP160,NCBP1,XPOT,RANGAP1,APPL2,EIF6,NUP37,NUP35,NUP153,NUP85,IWS1,NPM1,HNRNPA1,NOL6	-1.39112	-0.3397	52	126
REGULATION OF PHAGOCYTOSIS%GOBP%GO:0050764	REGULATION OF PHAGOCYTOSIS%GOBP%GO:0050764	0.0117136	0.0567368	1	TGM2,COLEC10,CFP,RAB31,DYSF,SIRPB1,ITGAV,MYO18A,ANO6,LMAN2	1.58476	0.503395	10	35
CARBOXYLIC ACID BIOSYNTHETIC PROCESS%GOBP%GO:0046394	CARBOXYLIC ACID BIOSYNTHETIC PROCESS%GOBP%GO:0046394	0.0117188	0.0567368	-1	SEPHS1,GLUD2,FASN,ACACB,MTHFR,SHMT1,GSTP1,PTGES3,AASDHPPT,OSBPL1A,GLUL,RGN,GSTM2,ASL,PARK7,AKR1D1,GAMT,BCAT2,GSTM4,GOT1,NDUFAB1,ADI1,CYP7B1,ACOT8,SCP2,ELOVL1,LTA4H,ASS1,AASS,MRI1,ALDH1A1,LTC4S,AKR1C3,CASP1,SUCLA2,GPX4,LIAS	-1.42578	-0.355909	37	108
ORGANIC ACID BIOSYNTHETIC PROCESS%GOBP%GO:0016053	ORGANIC ACID BIOSYNTHETIC PROCESS%GOBP%GO:0016053	0.0117188	0.0567368	-1	SEPHS1,GLUD2,FASN,ACACB,MTHFR,SHMT1,GSTP1,PTGES3,AASDHPPT,OSBPL1A,GLUL,RGN,GSTM2,ASL,PARK7,AKR1D1,GAMT,BCAT2,GSTM4,GOT1,NDUFAB1,ADI1,CYP7B1,ACOT8,SCP2,ELOVL1,LTA4H,ASS1,AASS,MRI1,ALDH1A1,LTC4S,AKR1C3,CASP1,SUCLA2,GPX4,LIAS	-1.42578	-0.355909	37	108
REGULATION OF TISSUE REMODELING%GOBP%GO:0034103	REGULATION OF TISSUE REMODELING%GOBP%GO:0034103	0.011733	0.0567378	1	THBS4,TGFB1,ITGB3,TMEM119,ROCK1,HRG,S1PR1,PLEKHM1,INPP5D,GPNMB	1.67812	0.63064	10	17
POSITIVE REGULATION OF KINASE ACTIVITY%GOBP%GO:0033674	POSITIVE REGULATION OF KINASE ACTIVITY%GOBP%GO:0033674	0.0118584	0.0571862	1	IGF1R,TGFB2,EPHB4,ROR1,TGFB1,PKD2,ITGB3,TPD52L1,HBEGF,ATP2B4,EPHA3,PRKAG1,PIBF1,DLG3,ADAM17,SNCA,TAOK3,MTOR,PDGFRB,BAD,RPTOR,CACUL1,CD74,INSR,ACE,RELN,HLA-DRB1,TLR3,CCND2,RHOA,DAB2IP,RALB,FERMT2,PIK3R4,LMTK2,EGFR,FGF1,CD81,DDR1,PTK2,TAOK2,FLT1,SRCIN1	1.43535	0.361565	43	127
REGULATION OF DNA METABOLIC PROCESS%GOBP%GO:0051052	REGULATION OF DNA METABOLIC PROCESS%GOBP%GO:0051052	0.011868	0.0571862	-1	KPNA2,SMARCD3,UBE2V1,OTUD4,SMARCE1,UBE2N,PTGES3,DEK,MCM4,ACTL6A,NUDT16L1,RUVBL1,ERCC1,PPP2CA,PRKCD,RGCC,ANKRD17,SMARCB1,SSBP1,UBE2V2,PPP4C,TIGAR,WDR48,POLG2,DMAP1,NEK7,TP53BP1,PPP4R2,CCT2,CCT4,RUVBL2,OTUB1,ADIPOQ,FAF1,TFIP11,USP7,RPS3,DFFA,UCHL5,SMARCC1,CCT7,HNRNPAB,PCNA,GTPBP4,HNRNPD,ENY2,PPP2R1A,EXOSC10,UBR5,XRCC5,GNL3,CCT3,MMS19	-1.35313	-0.315317	53	178
ADENYLATE CYCLASE-MODULATING G PROTEIN-COUPLED RECEPTOR SIGNALING PATHWAY%GOBP%GO:0007188	ADENYLATE CYCLASE-MODULATING G PROTEIN-COUPLED RECEPTOR SIGNALING PATHWAY%GOBP%GO:0007188	0.0118683	0.0571862	1	GNAO1,GNA14,FLNA,PF4,GNAI1,GNAI2,ADCY9,AKAP13,GNA11,S1PR1,CALCRL,GNAS,GNAQ,AKAP12,GNA13	1.61498	0.534195	15	29
RHO GTPASES ACTIVATE PAKS%REACTOME DATABASE ID RELEASE 81%5627123	RHO GTPASES ACTIVATE PAKS%REACTOME DATABASE ID RELEASE 81%5627123	0.0119048	0.0572934	1	CTTN,MYH10,FLNA,MYH11,MYLK,PPP1R12A,MYL6,MYH9,MYH14	1.66757	0.636465	9	16
ENERGY DERIVATION BY OXIDATION OF ORGANIC COMPOUNDS%GOBP%GO:0015980	ENERGY DERIVATION BY OXIDATION OF ORGANIC COMPOUNDS%GOBP%GO:0015980	0.0119595	0.0574884	-1	ME3,NDUFS7,COX6A2,NDUFA12,UQCC3,UQCRH,COQ10A,UQCRB,MDH1,NDUFA10,NDUFB7,ACADVL,NDUFA6,UQCRQ,GPD2,NDUFAB1,FH,NDUFV2,NDUFB3,PYGM,NDUFA5,MDH2,NDUFA4,UQCR11,COA6,SUCLG2,LYRM7,NDUFB9,NDUFS3,UQCRC1,UQCR10,SUCLA2,NDUFA11,MT-ND1,NDUFA9,MT-ATP6,ETFDH,NDUFS6,NDUFS1,SUCLG1,NDUFS8,ACO1,UGP2,NDUFS4,NDUFB6,NDUFC2,NDUFS2,ETFB,NDUFV1,NDUFB8,COX5B,NDUFAF1,PYGL,ACO2,COQ10B,COX5A,COX6B1,NDUFB4,NDUFA2,NDUFS5	-1.39027	-0.336982	60	132
POSITIVE REGULATION OF CALCIUM ION TRANSMEMBRANE TRANSPORTER ACTIVITY%GOBP%GO:1901021	POSITIVE REGULATION OF CALCIUM ION TRANSMEMBRANE TRANSPORTER ACTIVITY%GOBP%GO:1901021	0.0119969	0.0575994	1	CACNA2D1,PKD2,TRDN,JPH2,SLC9A1,PPP3CC	1.6436	0.600241	6	19
CHOLESTEROL METABOLIC PROCESS%GOBP%GO:0008203	CHOLESTEROL METABOLIC PROCESS%GOBP%GO:0008203	0.0120279	0.0576794	-1	PMVK,MVD,HMGCR,SCARF1,OSBPL1A,MVK,FDX1,AKR1D1,GBA,ACAA2	-1.62133	-0.51575	10	31
VITAMIN METABOLIC PROCESS%GOBP%GO:0006766	VITAMIN METABOLIC PROCESS%GOBP%GO:0006766	0.0120558	0.0577425	-1	PM20D2,BTD,MTHFD2,SHMT1,MTHFD2L,AASDHPPT,RGN,RBP1,HLCS,FPGS,NQO1,RFK	-1.57679	-0.483772	12	36
REGULATION OF PROTEIN SECRETION%GOBP%GO:0050708	REGULATION OF PROTEIN SECRETION%GOBP%GO:0050708	0.0120746	0.0577425	1	C1QTNF3,TGFB2,RHBDF1,ANO1,STX4,MYH10,TGFB1,MCU,TRPM4,GLUD1,ANKRD1,BAD,STX1A,HLA-DRB1,RAB11FIP5,LLGL1,PTPN23,TGFB3,MYO18A	1.51641	0.424615	19	66
ALPHA4 BETA1 INTEGRIN SIGNALING EVENTS%PATHWAY INTERACTION DATABASE NCI-NATURE CURATED DATA%ALPHA4 BETA1 INTEGRIN SIGNALING EVENTS	ALPHA4 BETA1 INTEGRIN SIGNALING EVENTS%PATHWAY INTERACTION DATABASE NCI-NATURE CURATED DATA%ALPHA4 BETA1 INTEGRIN SIGNALING EVENTS	0.0120875	0.0577425	1	JAM2,ABI1,THBS2,PTPRA,TLN1,PXN,ITGB1,IGSF8,CD81,PTK2,DOCK1,ARF6	1.62592	0.566407	12	23
RHOJ GTPASE CYCLE%REACTOME%R-HSA-9013409.3	RHOJ GTPASE CYCLE%REACTOME%R-HSA-9013409.3	0.0120983	0.0577425	1	ARHGAP1,FMNL3,CAV1,TMPO,CDC42BPB,SNAP23,ARHGAP35,GJA1,CDC42EP1,CDC42BPA,VAMP3,SCRIB,MPP7,WIPF2,WASL	1.57471	0.491037	15	38
SIGNALING BY INTERLEUKINS%REACTOME DATABASE ID RELEASE 81%449147	SIGNALING BY INTERLEUKINS%REACTOME DATABASE ID RELEASE 81%449147	0.0123547	0.0588963	-1	S100B,PSME2,RPS6KA1,STAT3,PSMA4,ITGB2,ITGAM,SAA1,MAP2K1,PSME1,UBE2V1,UBE2N,PSMD14,PSMB6,F13A1,STXBP2,LCP1,PSMA1,PTPN6,PSMB3,PSMA7,PSMB4,PPP2CA,PSMC2,PSMB7,PSMA6,PPP2CB,PSMB2,PSMA2,PSMD7,TIMP1,USP14,SNRPA1,TALDO1,MAPK14,PSMB8,PSMA3,MAP2K4,MAPKAPK3,PDCD4,PAK2,PSMD5	-1.33661	-0.306764	42	207
POST-TRANSCRIPTIONAL REGULATION OF GENE EXPRESSION%GOBP%GO:0010608	POST-TRANSCRIPTIONAL REGULATION OF GENE EXPRESSION%GOBP%GO:0010608	0.0124008	0.0590268	-1	RPS6KA1,CSDC2,EIF1,EIF4E,POLDIP3,POLR2G,CDC123,EIF5,SHMT1,LARP6,ZFP36L1,EIF2A,TIA1,ZC3H7B,FTO,FASTKD5,DPH6,RPS9,PRKCD,PPP1CA,CNBP,METTL5,NCBP2,RPS6KB1,NT5C3B,C1QBP,ELP4,EIF5A2,MAPK14,EXOSC3,RPS4X,EIF2AK2,GSPT1,NUDT21,EEF2,EIF2S1,FOXO3,EIF4A2,PCID2,EIF2S3,ELP6,RPS3,ETF1,DIS3L2,MTPN,SAMD4A,CALR,EIF4B,CARHSP1,EIF5A,UQCC2,PDE12,ZC3H14,EIF4EBP1,EXOSC9,PUM2,USP16,APEX1,DDX3X,HNRNPD,TRAP1,MTG1,RBM3,ELP2…	-1.31853	-0.297872	70	238
PROTEIN K63-LINKED UBIQUITINATION%GOBP%GO:0070534	PROTEIN K63-LINKED UBIQUITINATION%GOBP%GO:0070534	0.0124249	0.0590268	-1	UBE2G1,UBE2V1,UBE2N,UBE2V2,UBE2D4,UBE2B,NEDD4	-1.64715	-0.570222	7	22
S1P2 PATHWAY%PATHWAY INTERACTION DATABASE NCI-NATURE CURATED DATA%S1P2 PATHWAY	S1P2 PATHWAY%PATHWAY INTERACTION DATABASE NCI-NATURE CURATED DATA%S1P2 PATHWAY	0.0124259	0.0590268	1	GNAO1,GNA14,GNAI1,GNAI2,GNA11,GNAQ,RHOA,GNA13,MAPK1	1.66645	0.645473	9	15
REPRODUCTION%REACTOME%R-HSA-1474165.3	REPRODUCTION%REACTOME%R-HSA-1474165.3	0.0124617	0.0590574	1	HSPA2,MLH1,LMNB1,CD9,CDK4	1.63405	0.559315	5	25
VESICLE TRANSPORT ALONG MICROTUBULE%GOBP%GO:0047496	VESICLE TRANSPORT ALONG MICROTUBULE%GOBP%GO:0047496	0.0124617	0.0590574	1	FBXW11,KIF13A,NDE1,KIFAP3,DYNC1H1,KIF3B,AP3B1,BLOC1S5,AP3D1,HTT,RAB1A,BLOC1S2,KIF3A,KIF5B,AP3S1,TRAK1,BLOC1S1,FYCO1	1.63497	0.559629	18	25
SIGNALING BY GPCR%REACTOME%R-HSA-372790.5	SIGNALING BY GPCR%REACTOME%R-HSA-372790.5	0.0125176	0.0592531	1	PPBP,CD55,PLCB4,GNA14,HBEGF,CAMK2G,ITPR1,PF4,GNAI1,ECE1,PPP3CC,PDE1C,ARHGEF12,KALRN,GNAI2,CAMK2B,ADCY9,AKAP13,GNA11,ROCK1,CAMK2A,S1PR1,CALCRL,GNAS,ITGB1,ABHD12,GNAQ,RGS3,WNT9B,APP,ARHGEF40,RHOA,VAV2,FZD7,ITPR3,ARRB1,RGS6,EGFR,GNA13,ARHGEF2,CAMK2D,ARHGEF11,XK,CXCL12,ITPR2,OBSCN,MAPK1,RGS10	1.40086	0.346937	48	145
SMALL CELL LUNG CANCER%WIKIPATHWAYS_20220510%WP4658%HOMO SAPIENS	SMALL CELL LUNG CANCER%WIKIPATHWAYS_20220510%WP4658%HOMO SAPIENS	0.0125822	0.0594887	1	LAMB2,COL4A1,COL4A2,LAMA5,COL4A6,ITGAV,CDK4,NFKBIB,LAMA3,ITGB1,LAMA4,COL4A3,ITGA6,TRAF5,RXRB,LAMC1	1.55875	0.477676	16	41
NEGATIVE REGULATION OF MAPK PATHWAY%REACTOME%R-HSA-5675221.4	NEGATIVE REGULATION OF MAPK PATHWAY%REACTOME%R-HSA-5675221.4	0.012632	0.0596545	-1	MAP2K1,ARAF,MAP2K2,PPP2CA,PPP2CB,PEBP1,NRAS,PPP2R5D,PPP2R5C,PPP2R1A,BRAF,PPP2R5E	-1.6422	-0.568509	12	22
SYNAPTIC SIGNALING%GOBP%GO:0099536	SYNAPTIC SIGNALING%GOBP%GO:0099536	0.0126766	0.0597948	1	STX4,AGRN,FCHSD2,SNCA,HOMER1,PDLIM4,STX3,SNAP23,GNA11,ERC1,STX1A,SLC12A7,MBP,CPLX1,GNAQ,SPG11,PIP5K1C,AKAP9,CNP,AMPH,KCMF1,APOE,SLC12A4,UNC13B,ATXN3,SLC32A1,DLG1,DNAJC5,STX11	1.50141	0.406825	29	78
PID_VEGFR1_2_PATHWAY%MSIGDB_C2%PID_VEGFR1_2_PATHWAY	PID_VEGFR1_2_PATHWAY%MSIGDB_C2%PID_VEGFR1_2_PATHWAY	0.0127556	0.0600973	1	MYOF,FYN,ITGB3,PRKAG1,PRKAA2,ITGAV,CBL,ROCK1,PXN,HGS,PTPN11,SHB,PRKAB1,NCK1,PRKAA1,NCK2,RAF1,FLT1,MAPK1,GRB2	1.56334	0.481869	20	40
POSITIVE REGULATION OF CELL-MATRIX ADHESION%GOBP%GO:0001954	POSITIVE REGULATION OF CELL-MATRIX ADHESION%GOBP%GO:0001954	0.0128034	0.0602308	1	COL16A1,RIN2,RRAS,UTRN,NRP1,THY1,MAP4K4,ROCK1,HRG,LIMS1,FERMT2	1.63194	0.552539	11	26
PROCESSING OF CAPPED INTRON-CONTAINING PRE-MRNA%REACTOME DATABASE ID RELEASE 81%72203	PROCESSING OF CAPPED INTRON-CONTAINING PRE-MRNA%REACTOME DATABASE ID RELEASE 81%72203	0.0128236	0.0602308	-1	PPIL1,CD2BP2,EIF4E,POLDIP3,NUP43,POLR2G,SNRPG,PAPOLA,CSTF1,SNRPB2,MAGOH,DDX39A,PPIH,NCBP2,CDC40,SNRPD3,POLR2H,SNRPA1,PPWD1,SNRPF,TXNL4A,NUDT21,DHX15,CCAR1,PPIL3,SF3A2,LSM4,NUP155,TFIP11,CASC3,PRPF40A,LSM2,CTNNBL1,SRSF11,LSM7,GPKOW,POLR2J,SNRPE,THOC3,FIP1L1,SRSF3,HNRNPD,SRSF10,NUP50,NXF1,DNAJC8,DHX38,SNRPC,SNRPN,CPSF7,WDR33,HNRNPH1,HNRNPH2,ISY1,THOC6,SNW1,PABPN1,SNRPA,PPIL4,GTF2F1,HNRNPF,NUP160,PQ…	-1.33917	-0.309017	90	197
GLOBAL GENOME NUCLEOTIDE EXCISION REPAIR (GG-NER)%REACTOME%R-HSA-5696399.1	GLOBAL GENOME NUCLEOTIDE EXCISION REPAIR (GG-NER)%REACTOME%R-HSA-5696399.1	0.0128287	0.0602308	-1	COPS2,UBE2N,COPS8,ACTL6A,RUVBL1,ERCC1,COPS5,COPS4,UBE2V2,SUMO2,COPS6,CUL4B,COPS3,GPS1,PCNA,RBX1,RPA3	-1.56597	-0.466677	17	41
ADAPTIVE IMMUNE SYSTEM%REACTOME DATABASE ID RELEASE 81%1280218	ADAPTIVE IMMUNE SYSTEM%REACTOME DATABASE ID RELEASE 81%1280218	0.0128643	0.0603274	-1	IFI30,PSME2,RCHY1,FCGR3A,SIGLEC1,ASB11,LILRB5,PSMA4,ITGB2,UBE2G1,RAP1GAP2,ASB2,PSME1,UBE2V1,CTSC,LRSAM1,CD14,UBE2N,PSMD14,PSMB6,CTSA,NCF2,GLMN,LNX1,UBE2K,OSBPL1A,PSMA1,PTPN6,PSMB3,UBE2Z,PSMA7,PSMB4,NPEPPS,VAMP8,ZBTB16,PPP2CA,PSMC2,PSMB7,THEM4,ASB15,PSMA6,PPP2CB,MRC1,PSMB2,ACTR1B,PSMA2,UBE2V2,PSMD7,UBE2M,BCL10,UBE2D4,PSMB8,PSMA3,UBE2F,PAK2,NEDD4L,PSMD5,PTEN,TRIM63,KLHL21,SH3KBP1,UBE2B,FBXL18,PSMC1…	-1.26303	-0.272632	78	371
POSITIVE REGULATION OF RESPONSE TO WOUNDING%GOBP%GO:1903036	POSITIVE REGULATION OF RESPONSE TO WOUNDING%GOBP%GO:1903036	0.0129228	0.0605317	1	EMILIN1,HBEGF,MTOR,PTN,DMTN,HRG,MYLK,ITGB1,ANO6,PLAT,FERMT2,ACTG1,PTK2	1.61952	0.538798	13	28
SUPERPATHWAY OF CONVERSION OF GLUCOSE TO ACETYL COA AND ENTRY INTO THE TCA CYCLE%BIOCYC%PWY66-407	SUPERPATHWAY OF CONVERSION OF GLUCOSE TO ACETYL COA AND ENTRY INTO THE TCA CYCLE%BIOCYC%PWY66-407	0.0130425	0.0610216	-1	ENO3,HK3,GPI,ALDOC,ALDOA,MDH1,PFKM,ENO1,PGAM2,FH,TPI1,MDH2,SUCLG2	-1.56405	-0.466107	13	41
TRANSLATION%GOBP%GO:0006412	TRANSLATION%GOBP%GO:0006412	0.0131646	0.061521	-1	RPS15A,EIF4E,EIF5,RARS2,RPS13,RPS18,FARSB,RPS9,TUFM,COPS5,EIF4A1,CARS2,RPS16,RPS7,NCBP2,EIF3I,RPS4X,GSPT1,DHPS,PABPC4,EEF1D,DRG1,EEF2,RPS17,RPLP2,EIF3F,EIF4A2,EIF3M,EIF2S3,RPS12,QRSL1,EEF1A2,RPS3,ABCE1,RPS20,APEH,ETF1,RPS24,EIF3J,RPL23,MRPL4,MTIF3,DENR,EIF4B,EEF1B2,RPS27,RPSA,RPS21,ZC3H15,DRG2,MRPS6,DDX3X,LARS2,MTG1,RPS15,DHX29,MRPS21,GSPT2,RPS2,MRPS33,RPS29,RPS5,RPLP0,MRPS16,MCTS1,TRIP4,EIF2S2,N…	-1.29156	-0.288707	115	264
PID_S1P_S1P3_PATHWAY%MSIGDB_C2%PID_S1P_S1P3_PATHWAY	PID_S1P_S1P3_PATHWAY%MSIGDB_C2%PID_S1P_S1P3_PATHWAY	0.0131906	0.0615714	1	GNAO1,GNA14,ITGB3,GNAI1,ITGAV,GNA11,S1PR1,GNAQ,GNA13,FLT1,MAPK1	1.65812	0.642249	11	15
REGULATION OF SUPRAMOLECULAR FIBER ORGANIZATION%GOBP%GO:1902903	REGULATION OF SUPRAMOLECULAR FIBER ORGANIZATION%GOBP%GO:1902903	0.0132553	0.0618018	1	SYNPO2L,TNXB,AEBP1,TJP1,CTTN,DBNL,EMILIN1,SVIL,FCHSD2,SLC9A1,SNCA,ESAM,CYFIP1,NRP1,PHLDB2,DBN1,MAP2,AKAP13,MYADM,ARHGAP35,TAOK1,LIMA1,MECP2,ROCK1,GSN,PXN,CDC42EP1,COLGALT1,TGFB3,LMOD2,STMN1,SSH3,CAMSAP1,CORO1B,PSEN1,AKAP9,APP,SYNPO,RHOA,APOE,SORBS3,TRIOBP,PPFIA1,MAP1A,ARAP1,FERMT2,NCK1,NCKAP1,ACTG1,SYNPO2,NCK2,CLASP1,ARHGEF2,MYOC,BIN1,CXCL12,TBCD,FER,ARF6,CLU,VASP,CKAP5,CDC42EP3,INPPL1,LMOD1	1.35774	0.324853	65	189
CLASS B 2 (SECRETIN FAMILY RECEPTORS)%REACTOME%R-HSA-373080.2	CLASS B 2 (SECRETIN FAMILY RECEPTORS)%REACTOME%R-HSA-373080.2	0.0132718	0.0618073	1	CD55,CALCRL,GNAS,WNT9B,FZD7	1.67163	0.6282	5	17
ATP BIOSYNTHETIC PROCESS%GOBP%GO:0006754	ATP BIOSYNTHETIC PROCESS%GOBP%GO:0006754	0.0133421	0.062063	-1	NDUFS7,NDUFA12,ALDOA,NDUFA10,NDUFB7,NDUFA6,NDUFAB1,NDUFV2,NDUFB3,NDUFA5,NDUFB9,NDUFS3,NDUFA11,MT-ND1,NDUFA9,MT-ATP6,NDUFS6,NDUFS1,NDUFS8,NDUFS4,NDUFB6,NDUFC2,NDUFS2,NDUFV1,NDUFB8	-1.50608	-0.42573	25	53
TRANSLATION INHIBITORS IN CHRONICALLY ACTIVATED PDGFRA CELLS%WIKIPATHWAYS_20220510%WP4566%HOMO SAPIENS	TRANSLATION INHIBITORS IN CHRONICALLY ACTIVATED PDGFRA CELLS%WIKIPATHWAYS_20220510%WP4566%HOMO SAPIENS	0.0133723	0.0621321	-1	RPS6KA1,EIF4E,MAP2K1,MAP2K2,EIF4A1,RPS6KB1,MAPK14,MAP2K4,EIF4A2,EIF4B,EIF4EBP1,RPS6KA5	-1.61961	-0.543682	12	25
CHONDROITIN SULFATE DERMATAN SULFATE METABOLISM%REACTOME DATABASE ID RELEASE 81%1793185	CHONDROITIN SULFATE DERMATAN SULFATE METABOLISM%REACTOME DATABASE ID RELEASE 81%1793185	0.0134409	0.0623786	1	SDC2,AGRN,HSPG2,BGN,VCAN,DCN,B3GALT6	1.66216	0.634397	7	16
NEGATIVE REGULATION OF CELLULAR COMPONENT ORGANIZATION%GOBP%GO:0051129	NEGATIVE REGULATION OF CELLULAR COMPONENT ORGANIZATION%GOBP%GO:0051129	0.0135942	0.0630175	1	HSPA2,RTN4,TJP1,MUL1,FYN,SEMA3D,DPYSL3,TGFB1,APOC1,ITGB3,EMILIN1,PTPN9,SVIL,CAV1,EPHA3,SEMA5B,SLC25A6,SNCA,XRN1,SCAF8,MAP4,FAP,PHLDB2,JAM3,ITGAV,SMCR8,THY1,APOA4,MAP2,SEMA3C,MYADM,GHITM,SACS,CORO1C,TAOK1,ACE,LIMA1,DMTN,ANXA2,ROCK1,GSN,HRG,STMN1,SEC22B,SSH3,CAMSAP1,VAT1,CORO1B,PSEN1,PACSIN3,APP,SLC35F6,APOE,ANKRD13D,TRIOBP	1.33422	0.308463	55	257
EPITHELIAL TO MESENCHYMAL TRANSITION%GOBP%GO:0001837	EPITHELIAL TO MESENCHYMAL TRANSITION%GOBP%GO:0001837	0.0136172	0.0630518	1	TGFB2,TGFB1,LOXL2,PEF1,ROCK1,PDCD6,LIMS1,NOLC1,POLR1B,LOXL3,TCOF1,CUL7	1.62295	0.559852	12	24
CELL DIVISION%GOBP%GO:0051301	CELL DIVISION%GOBP%GO:0051301	0.0139241	0.0643987	1	TGFB2,MYH10,RAB35,SPIRE1,GNAI1,CENPA,SPTBN1,EXOC2,DOCK7,MAP4,GNAI2,ROCK1,SNX18,STMN1,CUL3,RAB10,TUBB,RHOA,EXOC7,EXOC3,TUBA1A,MYH9,CLASP1,ARHGEF2,CUL7,ANXA11,CHMP5,EXOC6B,EXOC5,EXOC4,EXOC1	1.46798	0.396634	31	79
INTRACELLULAR PH REDUCTION%GOBP%GO:0051452	INTRACELLULAR PH REDUCTION%GOBP%GO:0051452	0.0139875	0.0645975	-1	DMXL2,ATP6V1D,DMXL1,PPT1,ATP6V0D1,CLN5,RAB20,ATP6V1H,ATP6V1F,ATP6AP2	-1.62105	-0.555395	10	23
S1P3 PATHWAY%PATHWAY INTERACTION DATABASE NCI-NATURE CURATED DATA%S1P3 PATHWAY	S1P3 PATHWAY%PATHWAY INTERACTION DATABASE NCI-NATURE CURATED DATA%S1P3 PATHWAY	0.0140169	0.0645975	1	GNAO1,GNA14,GNAI1,GNAI2,PDGFRB,GNA11,GNAQ,RHOA,GNA13,FLT1,MAPK1	1.65712	0.632475	11	16
DENDRITE MORPHOGENESIS%GOBP%GO:0048813	DENDRITE MORPHOGENESIS%GOBP%GO:0048813	0.0140169	0.0645975	1	SDC2,FARP1,NRP1,PTN,MAP2,TAOK2,WASL	1.65726	0.632529	7	16
ALPHA6BETA4INTEGRIN%IOB%ALPHA6BETA4INTEGRIN	ALPHA6BETA4INTEGRIN%IOB%ALPHA6BETA4INTEGRIN	0.0140311	0.0645975	1	ITGB4,LAMB2,FYN,LAMA5,DST,MTOR,BAD,SMAD2,LAMA3,PTPN11,ITGA6,PLEC,EGFR,YWHAQ,LAMC1	1.55569	0.491441	15	36
TRIGLYCERIDE METABOLISM%REACTOME%R-HSA-8979227.1	TRIGLYCERIDE METABOLISM%REACTOME%R-HSA-8979227.1	0.0140816	0.0646823	-1	ABHD5,FABP5,PPP1CC,PLIN1,PPP1CA,FABP4,GPD2,LIPE,FABP3,PRKACG,GK2	-1.63485	-0.565964	11	22
ACTIVATION OF GENE EXPRESSION BY SREBF (SREBP)%REACTOME%R-HSA-2426168.3	ACTIVATION OF GENE EXPRESSION BY SREBF (SREBP)%REACTOME%R-HSA-2426168.3	0.0140816	0.0646823	-1	PMVK,FASN,SMARCD3,ACACB,MVD,GGPS1,MVK,FDPS,IDI1	-1.6353	-0.566121	9	22
PDGFR-BETA SIGNALING PATHWAY%PATHWAY INTERACTION DATABASE NCI-NATURE CURATED DATA%PDGFR-BETA SIGNALING PATHWAY	PDGFR-BETA SIGNALING PATHWAY%PATHWAY INTERACTION DATABASE NCI-NATURE CURATED DATA%PDGFR-BETA SIGNALING PATHWAY	0.0141476	0.0649114	1	CTTN,FYN,ABI1,SLC9A3R1,ITGB3,PDGFRB,ITGAV,RAP1B,ARHGAP35,ACTN4,CBL,STAT5B,S1PR1,ACTR3,PTPN11,RHOA,PTPN2,RAPGEF1,ACTR2,VAV2,ARAP1,NCK1,NCKAP1,DNM2,YWHAQ,NCK2,RAF1,SIPA1,YWHAH,ACTA2,TAGLN,PLCG1,WASL,ARPC5,IQGAP1,MAPK1,GRB2	1.44505	0.380244	37	94
PERK REGULATES GENE EXPRESSION%REACTOME DATABASE ID RELEASE 81%381042	PERK REGULATES GENE EXPRESSION%REACTOME DATABASE ID RELEASE 81%381042	0.0142528	0.0653198	-1	EXOSC3,EIF2S1,EIF2S3,NFYC,EXOSC9,EXOSC7,HERPUD1,EIF2S2,ASNS,EXOSC6,PARN	-1.63682	-0.627389	11	15
REGULATION OF CHEMOTAXIS%GOBP%GO:0050920	REGULATION OF CHEMOTAXIS%GOBP%GO:0050920	0.0142753	0.0653486	1	THBS4,STX4,SEMA3D,TGFB1,MCU,SEMA5B,ADAM17,RARRES2,NRP1,JAM3,PDGFRB,MYCBP2,PTN,SEMA3C,STX3,CD74,HRG,ANO6,CORO1B,PTPN2	1.49636	0.417916	20	67
REGULATION OF FILOPODIUM ASSEMBLY%GOBP%GO:0051489	REGULATION OF FILOPODIUM ASSEMBLY%GOBP%GO:0051489	0.0143321	0.0655345	1	DPYSL3,AGRN,NRP1,FSCN1,DMTN,FMR1,TGFB3,PALM,ARAP1,FXR1,WASL,ARF6	1.61774	0.547729	12	26
REGULATION OF INSULIN SECRETION%REACTOME%R-HSA-422356.4	REGULATION OF INSULIN SECRETION%REACTOME%R-HSA-422356.4	0.0144655	0.0660696	1	GNA14,ITPR1,GNAI1,GNAI2,GNA11,STX1A,GNAS,SLC2A1,GNAQ,CACNA2D2,ITPR3,ACSL4,IQGAP1,ITPR2,PRKAR2B,CACNA1C,ACSL3	1.55371	0.471679	17	43
VEGFA-VEGFR2 PATHWAY%REACTOME DATABASE ID RELEASE 81%4420097	VEGFA-VEGFR2 PATHWAY%REACTOME DATABASE ID RELEASE 81%4420097	0.0146413	0.0667967	1	FYN,ABI1,ITGB3,CAV1,ITPR1,CYFIP1,MTOR,ITGAV,ROCK1,PXN,RICTOR,RHOA,SHB,VAV2,NCK1,ITPR3,NCKAP1,NOS3,NCK2,PTK2,ELMO2,DOCK1,MAPKAP1,PLCG1	1.49388	0.417223	24	67
REGULATION OF SECRETION%GOBP%GO:0051046	REGULATION OF SECRETION%GOBP%GO:0051046	0.0147085	0.0670274	1	C1QTNF3,TGFB2,RHBDF1,ANO1,STX4,MYH10,CASK,TGFB1,CADPS,MCU,TRPM4,SNCA,ATP9A,RAB8B,GLUD1,ANKRD1,SMCR8,BAD,STAM,RAP1B,CD74,STX1A,GJA1,ANXA2,HLA-DRB1,RAB11FIP5,CAMK2A,LLGL1,PTPN23,FMR1,CPLX1,RAB33B,TGFB3,MYO18A,RAB10,VAMP3,HGS,NSF	1.38042	0.33876	38	154
POSITIVE REGULATION OF GTPASE ACTIVITY%GOBP%GO:0043547	POSITIVE REGULATION OF GTPASE ACTIVITY%GOBP%GO:0043547	0.01492	0.0679147	1	TGM2,RABGAP1,AGRN,AGAP3,DOCK6,CAV2,RABGAP1L,DOCK7,SMCR8,THY1,MAPRE2,TBC1D9B,CORO1C,MAP4K4,RALGAPB,SNX18,TBC1D1,ITGB1,RALBP1,LIMS1,SCRIB,RAPGEF1,ITGA6,ARAP1,FERMT2,RGS6,SGSM1	1.43929	0.380299	27	92
POSITIVE REGULATION OF DEVELOPMENTAL GROWTH%GOBP%GO:0048639	POSITIVE REGULATION OF DEVELOPMENTAL GROWTH%GOBP%GO:0048639	0.0149597	0.0680187	1	AGRN,DBNL,NRP1,DBN1,GOLGA4,INSR	1.60989	0.555346	6	24
PID_TXA2PATHWAY%MSIGDB_C2%PID_TXA2PATHWAY	PID_TXA2PATHWAY%MSIGDB_C2%PID_TXA2PATHWAY	0.0149798	0.0680334	1	FYN,GNA14,SLC9A3R1,GNA11,ROCK1,GNAQ,EGFR,GNA13	1.61638	0.581767	8	20
REGULATION OF SECRETION BY CELL%GOBP%GO:1903530	REGULATION OF SECRETION BY CELL%GOBP%GO:1903530	0.0151622	0.0687842	1	C1QTNF3,TGFB2,RHBDF1,ANO1,STX4,MYH10,CASK,TGFB1,CADPS,MCU,TRPM4,SNCA,ATP9A,RAB8B,GLUD1,ANKRD1,SMCR8,BAD,STAM,RAP1B,STX1A,GJA1,ANXA2,HLA-DRB1,RAB11FIP5,CAMK2A,LLGL1,PTPN23,FMR1,CPLX1,RAB33B,TGFB3,MYO18A,RAB10,VAMP3,HGS,NSF	1.385	0.343422	37	144
TRANSFORMING GROWTH FACTOR BETA RECEPTOR SIGNALING PATHWAY%GOBP%GO:0007179	TRANSFORMING GROWTH FACTOR BETA RECEPTOR SIGNALING PATHWAY%GOBP%GO:0007179	0.0152005	0.0688803	1	TGFB2,TGFB1,LTBP2,FMOD,ITGB5,COL3A1,COL1A2,SMAD2,PXN,ITGB1,TGFB3,TGFBRAP1,FERMT2,USP9X,PTK2	1.58947	0.516448	15	31
REGULATION OF GTPASE ACTIVITY%GOBP%GO:0043087	REGULATION OF GTPASE ACTIVITY%GOBP%GO:0043087	0.0152212	0.068897	1	TGM2,PLXNA1,RABGAP1,AGRN,EPHA3,AGAP3,DOCK6,CAV2,RABGAP1L,DOCK7,SMCR8,THY1,MAPRE2,TBC1D9B,CORO1C,MAP4K4,RALGAPB,PLXNB2,SNX18,TBC1D1,ITGB1,STMN1,RALBP1,LIMS1,SCRIB,PLXNA2,DAB2IP,RAPGEF1,VAV2,ITGA6,ARAP1,FERMT2,RGS6,SGSM1,FGD5,RHOG,PTK2,SIPA1	1.41166	0.355598	38	127
POSITIVE REGULATION OF PEPTIDE SECRETION%GOBP%GO:0002793	POSITIVE REGULATION OF PEPTIDE SECRETION%GOBP%GO:0002793	0.0153876	0.0689339	1	ANO1,STX4,MCU,TRPM4,GLUD1,BAD,HLA-DRB1,ACSL4,FGG,FGB,FGA	1.63952	0.616135	11	17
POSITIVE REGULATION OF PEPTIDE HORMONE SECRETION%GOBP%GO:0090277	POSITIVE REGULATION OF PEPTIDE HORMONE SECRETION%GOBP%GO:0090277	0.0153876	0.0689339	1	ANO1,STX4,MCU,TRPM4,GLUD1,BAD,HLA-DRB1,ACSL4,FGG,FGB,FGA	1.63952	0.616135	11	17
GLUCONEOGENESIS%PATHWHIZ%PW000152	GLUCONEOGENESIS%PATHWHIZ%PW000152	0.015436	0.0689339	-1	GPI,ALDOA,ENO1,LDHA,PGAM2,TPI1,MDH2	-1.64247	-0.617891	7	16
GLYCOGEN STORAGE DISEASE TYPE 1A (GSD1A) OR VON GIERKE DISEASE%SMPDB%SMP0000374	GLYCOGEN STORAGE DISEASE TYPE 1A (GSD1A) OR VON GIERKE DISEASE%SMPDB%SMP0000374	0.015436	0.0689339	-1	GPI,ALDOA,ENO1,LDHA,PGAM2,TPI1,MDH2	-1.64247	-0.617891	7	16
PHOSPHOENOLPYRUVATE CARBOXYKINASE DEFICIENCY 1 (PEPCK1)%SMPDB%SMP0000560	PHOSPHOENOLPYRUVATE CARBOXYKINASE DEFICIENCY 1 (PEPCK1)%SMPDB%SMP0000560	0.015436	0.0689339	-1	GPI,ALDOA,ENO1,LDHA,PGAM2,TPI1,MDH2	-1.64247	-0.617891	7	16
FRUCTOSE-1,6-DIPHOSPHATASE DEFICIENCY%SMPDB%SMP0000562	FRUCTOSE-1,6-DIPHOSPHATASE DEFICIENCY%SMPDB%SMP0000562	0.015436	0.0689339	-1	GPI,ALDOA,ENO1,LDHA,PGAM2,TPI1,MDH2	-1.64247	-0.617891	7	16
TRIOSEPHOSPHATE ISOMERASE DEFICIENCY%PATHWHIZ%PW000539	TRIOSEPHOSPHATE ISOMERASE DEFICIENCY%PATHWHIZ%PW000539	0.015436	0.0689339	-1	GPI,ALDOA,ENO1,LDHA,PGAM2,TPI1,MDH2	-1.64247	-0.617891	7	16
GLYCOGENOSIS, TYPE IB%SMPDB%SMP0000573	GLYCOGENOSIS, TYPE IB%SMPDB%SMP0000573	0.015436	0.0689339	-1	GPI,ALDOA,ENO1,LDHA,PGAM2,TPI1,MDH2	-1.64247	-0.617891	7	16
GLYCOGENOSIS, TYPE IC%SMPDB%SMP0000574	GLYCOGENOSIS, TYPE IC%SMPDB%SMP0000574	0.015436	0.0689339	-1	GPI,ALDOA,ENO1,LDHA,PGAM2,TPI1,MDH2	-1.64247	-0.617891	7	16
GLYCOGENOSIS, TYPE IA. VON GIERKE DISEASE%SMPDB%SMP0000581	GLYCOGENOSIS, TYPE IA. VON GIERKE DISEASE%SMPDB%SMP0000581	0.015436	0.0689339	-1	GPI,ALDOA,ENO1,LDHA,PGAM2,TPI1,MDH2	-1.64247	-0.617891	7	16
MYD88 DEPENDENT CASCADE INITIATED ON ENDOSOME%REACTOME DATABASE ID RELEASE 81%975155	MYD88 DEPENDENT CASCADE INITIATED ON ENDOSOME%REACTOME DATABASE ID RELEASE 81%975155	0.0154516	0.0689339	-1	S100B,RPS6KA1,SAA1,MAP2K1,UBE2V1,CD14,UBE2N,PPP2CA,PPP2CB,USP14,MAPK14,MAP2K4,MAPKAPK3	-1.51513	-0.435682	13	49
TRAF6 MEDIATED INDUCTION OF NFKB AND MAP KINASES UPON TLR7 8 OR 9 ACTIVATION%REACTOME DATABASE ID RELEASE 81%975138	TRAF6 MEDIATED INDUCTION OF NFKB AND MAP KINASES UPON TLR7 8 OR 9 ACTIVATION%REACTOME DATABASE ID RELEASE 81%975138	0.0154516	0.0689339	-1	S100B,RPS6KA1,SAA1,MAP2K1,UBE2V1,CD14,UBE2N,PPP2CA,PPP2CB,USP14,MAPK14,MAP2K4,MAPKAPK3	-1.51513	-0.435682	13	49
TOLL LIKE RECEPTOR 7 8 (TLR7 8) CASCADE%REACTOME DATABASE ID RELEASE 81%168181	TOLL LIKE RECEPTOR 7 8 (TLR7 8) CASCADE%REACTOME DATABASE ID RELEASE 81%168181	0.0154516	0.0689339	-1	S100B,RPS6KA1,SAA1,MAP2K1,UBE2V1,CD14,UBE2N,PPP2CA,PPP2CB,USP14,MAPK14,MAP2K4,MAPKAPK3	-1.51513	-0.435682	13	49
LEUCINE, ISOLEUCINE AND VALINE METABOLISM%WIKIPATHWAYS_20220510%WP4686%HOMO SAPIENS	LEUCINE, ISOLEUCINE AND VALINE METABOLISM%WIKIPATHWAYS_20220510%WP4686%HOMO SAPIENS	0.0155104	0.0691197	-1	ALDH6A1,ACAT1,BCAT2,ECHS1,HIBADH,PCCB,ACAD8	-1.63109	-0.625193	7	15
STEM CELL DIFFERENTIATION%GOBP%GO:0048863	STEM CELL DIFFERENTIATION%GOBP%GO:0048863	0.015628	0.0695669	1	TGFB2,SEMA3D,SEMA5B,NRP1,SEMA3C,CORO1C,PHOX2B,PEF1,ACE,PDCD6,ANXA6,NOLC1,TCOF1	1.57948	0.517548	13	30
ACTIN FILAMENT BUNDLE ASSEMBLY%GOBP%GO:0051017	ACTIN FILAMENT BUNDLE ASSEMBLY%GOBP%GO:0051017	0.0156968	0.0697193	1	DPYSL3,SPIRE1,ITGB5,PLS3,CALD1,FSCN1,PDLIM1,LIMA1,DMTN,ITGB1,CUL3,CORO1B,RHOA,SORBS1,ARRB1	1.58519	0.524341	15	29
ACTIN FILAMENT BUNDLE ORGANIZATION%GOBP%GO:0061572	ACTIN FILAMENT BUNDLE ORGANIZATION%GOBP%GO:0061572	0.0156968	0.0697193	1	DPYSL3,SPIRE1,ITGB5,PLS3,CALD1,FSCN1,PDLIM1,LIMA1,DMTN,ITGB1,CUL3,CORO1B,RHOA,SORBS1,ARRB1	1.58519	0.524341	15	29
ORGANELLE FUSION%GOBP%GO:0048284	ORGANELLE FUSION%GOBP%GO:0048284	0.0157552	0.0698325	1	STX4,BET1,YIPF4,RAB34,DYSF,SNCA,CAV2,RAB8B,VTI1A,YIPF5,STX3,SNAP23,STX16,STX1A,TGFBRAP1,SEC22B,VAMP3,PLEKHM1,VPS41,EEA1,RAB8A,STX12,STX7,VAMP7,STX11,STX10,CHMP5,VPS18,BNIP1,VPS33A,MFF,SNAP29,STX2,STOML2,GDAP1,VTI1B,RAB13,THG1L	1.4691	0.398069	38	78
G PROTEIN SIGNALING PATHWAYS%WIKIPATHWAYS_20220510%WP35%HOMO SAPIENS	G PROTEIN SIGNALING PATHWAYS%WIKIPATHWAYS_20220510%WP35%HOMO SAPIENS	0.0157569	0.0698325	1	GNAO1,GNA14,RRAS,GNAI1,PPP3CC,PDE1C,ADCY9,GNA11,GNAS,GNAQ,AKAP9,AKAP12,GNA13	1.53764	0.473946	13	40
PROTEIN LOCALIZATION TO PLASMA MEMBRANE%GOBP%GO:0072659	PROTEIN LOCALIZATION TO PLASMA MEMBRANE%GOBP%GO:0072659	0.0158216	0.0700425	1	ANK1,SLC9A3R1,RAB31,EFR3A,KIF13A,FLNA,RAB34,SPTBN1,SLMAP,RAB8B,FLOT2,RILPL1,GOLGA4,TTC7B,ROCK1,GOLGA7,EHD3,FLOT1,RAB10,SCRIB,NSF,ATP1B3,FCHO2,PACS1,RAB8A,DLG1	1.44728	0.383298	26	90
MUSCLE TISSUE DEVELOPMENT%GOBP%GO:0060537	MUSCLE TISSUE DEVELOPMENT%GOBP%GO:0060537	0.0158473	0.0700791	1	SGCG,TGFB2,DMD,TGFB1,PKD2,NOTCH2,SGCD,PGM5,SVIL,CAV1,CAV2,MYL6B,MYH11,PDGFRB,ANKRD1,AKAP13,GJA1,CSRP1,S1PR1,MYLK,LEMD2,IGSF8,SORBS2,MYL6,ALPK3,NPPA,CSRP2,TTN	1.45275	0.38604	28	88
PID_INTEGRIN_A4B1_PATHWAY%MSIGDB_C2%PID_INTEGRIN_A4B1_PATHWAY	PID_INTEGRIN_A4B1_PATHWAY%MSIGDB_C2%PID_INTEGRIN_A4B1_PATHWAY	0.0159646	0.0705206	1	JAM2,THBS2,PTPRA,AMICA1,TLN1,PXN,ITGB1,IGSF8,CD81,DOCK1,ARF6	1.63437	0.614199	11	17
TRANSMISSION ACROSS CHEMICAL SYNAPSES%REACTOME%R-HSA-112315.6	TRANSMISSION ACROSS CHEMICAL SYNAPSES%REACTOME%R-HSA-112315.6	0.0160014	0.0706059	1	CASK,CACNA2D1,CAMK2G,PRKAG1,EPB41L1,GNAI1,DLG3,PRKAA2,GNAI2,CAMK2B,PPFIA4,ADCY9,STX1A,PRKAB2,NPTN,CAMK2A,CPLX1,COMT,CACNA2D2,NSF,PPFIA1,UNC13B,SLC32A1,DLG1,PRKAB1,PRKAA1,DNAJC5,NAAA	1.44396	0.382419	28	90
DICARBOXYLIC ACID CATABOLIC PROCESS%GOBP%GO:0043649	DICARBOXYLIC ACID CATABOLIC PROCESS%GOBP%GO:0043649	0.0162703	0.071714	-1	PM20D2,GLUD2,AASDHPPT,GLUL,GOT1,ALDH1L1,ACOT8,MTHFS,ASPA	-1.63967	-0.616836	9	16
POSITIVE REGULATION OF SUBSTRATE ADHESION-DEPENDENT CELL SPREADING%GOBP%GO:1900026	POSITIVE REGULATION OF SUBSTRATE ADHESION-DEPENDENT CELL SPREADING%GOBP%GO:1900026	0.0169169	0.0744825	1	FLNA,NRP1,MYADM,DMTN,LIMS1,TRIOBP,FERMT2,ILK,DOCK5,DOCK1,MYOC,FGG,FGB,FGA	1.60816	0.538807	14	27
STEM CELL DEVELOPMENT%GOBP%GO:0048864	STEM CELL DEVELOPMENT%GOBP%GO:0048864	0.0170924	0.0751729	1	SEMA3D,SEMA5B,NRP1,SEMA3C,CORO1C,PHOX2B,PEF1,PDCD6,ANXA6,NOLC1,TCOF1	1.60181	0.576526	11	20
REGULATION OF CELLULAR RESPONSE TO GROWTH FACTOR STIMULUS%GOBP%GO:0090287	REGULATION OF CELLULAR RESPONSE TO GROWTH FACTOR STIMULUS%GOBP%GO:0090287	0.0171604	0.0753899	1	CASK,TGFB1,LTBP1,CRIM1,ITGB3,EMILIN1,CAV1,ATP2B4,ADAM17,ASPN,LTBP4,DCN,NRP1,PBLD,FAM89B,SMAD2,MYO1C,NPTN,PDCD6,HRG,FBN2,CREBBP,HGS,LEMD2,DAB2IP	1.45086	0.388522	25	84
NUCLEAR RECEPTORS META-PATHWAY%WIKIPATHWAYS_20220510%WP2882%HOMO SAPIENS	NUCLEAR RECEPTORS META-PATHWAY%WIKIPATHWAYS_20220510%WP2882%HOMO SAPIENS	0.0172414	0.0756389	-1	FKBP5,MGST1,PLTP,SERPINA1,DBI,STAT3,FASN,GCLM,ABCC5,PTGES3,CPT2,CDC37,FTH1,GSTM2,PDK4,PTGR1,TXN	-1.41919	-0.36788	17	84
N-CADHERIN SIGNALING EVENTS%PATHWAY INTERACTION DATABASE NCI-NATURE CURATED DATA%N-CADHERIN SIGNALING EVENTS	N-CADHERIN SIGNALING EVENTS%PATHWAY INTERACTION DATABASE NCI-NATURE CURATED DATA%N-CADHERIN SIGNALING EVENTS	0.0172546	0.0756389	1	CTTN,CAMK2G,GJA1,ROCK1,GSN,PTPN11,PIP5K1C,RHOA,PLCG1,FER,CTNNB1,GAP43,CDH2,KIF5B,RAC1,DCTN1,CTNNA1	1.59822	0.547053	17	25
PID_AMB2_NEUTROPHILS_PATHWAY%MSIGDB_C2%PID_AMB2_NEUTROPHILS_PATHWAY	PID_AMB2_NEUTROPHILS_PATHWAY%MSIGDB_C2%PID_AMB2_NEUTROPHILS_PATHWAY	0.0174149	0.0762586	1	JAM2,FYN,CTGF,JAM3,THY1,TLN1,ROCK1,PLAT	1.61188	0.588658	8	19
PID_ECADHERIN_NASCENT_AJ_PATHWAY%MSIGDB_C2%PID_ECADHERIN_NASCENT_AJ_PATHWAY	PID_ECADHERIN_NASCENT_AJ_PATHWAY%MSIGDB_C2%PID_ECADHERIN_NASCENT_AJ_PATHWAY	0.0175913	0.0769478	1	CSNK2A2,PIP5K1C,RAPGEF1,VAV2,CSNK2A1,NCKAP1,ARF6,CTNNB1,KLHL20	1.58948	0.560835	9	22
SKELETAL MUSCLE ORGAN DEVELOPMENT%GOBP%GO:0060538	SKELETAL MUSCLE ORGAN DEVELOPMENT%GOBP%GO:0060538	0.017638	0.0770685	1	DAG1,DMD,SVIL,CAV1,CAV2,MYL6B,LEMD2,IGSF8,MYL6,FXR1,MYH14,DES,CSRP3,BASP1	1.59567	0.546179	14	25
TRANSLATION%REACTOME%R-HSA-72766.4	TRANSLATION%REACTOME%R-HSA-72766.4	0.0178527	0.0778743	-1	RPS15A,EIF4E,EIF5,RARS2,RPS13,EEF1E1,RPS18,FARSB,RPS9,TUFM,EIF4A1,CARS2,TRMT112,RPS16,RPS7,EIF3I,RPS4X,GSPT1,EEF1D,EEF2,RPS17,RPLP2,EIF2S1,PPA2,EIF3F,EIF4A2,AIMP2,PPA1,EIF3M,EIF2S3,RPS12,EEF1A2,RPS3,RPS20,APEH,AIMP1,ETF1,RPS24,EIF3J,RPL23,MRPL4,MTIF3,EIF4B,EEF1B2,RPS27,EIF4EBP1,RPSA,RPS21,MRPS6,LARS2,RPS15,SRP72,MRPS21,GSPT2,SRP9,RPS2,MRPS33,RPS29,RPS5,RPLP0,MRPS16,N6AMT1,EIF2S2,EIF3D,RPL18A,RPS1…	-1.27795	-0.286539	111	256
NUCLEOTIDE EXCISION REPAIR%REACTOME DATABASE ID RELEASE 81%5696398	NUCLEOTIDE EXCISION REPAIR%REACTOME DATABASE ID RELEASE 81%5696398	0.0178611	0.0778743	-1	COPS2,POLR2G,UBE2N,COPS8,ACTL6A,RUVBL1,ERCC1,COPS5,COPS4,UBE2V2,POLR2H,SUMO2,COPS6,CUL4B,COPS3,USP7,GPS1,POLR2J,PCNA,RBX1,EP300,RPA3,ISY1,COPS7A	-1.46775	-0.407196	24	58
NEGATIVE REGULATION OF CELL MOTILITY%GOBP%GO:2000146	NEGATIVE REGULATION OF CELL MOTILITY%GOBP%GO:2000146	0.0179078	0.0779811	1	DAG1,IGFBP5,DPYSL3,TGFB1,RAP2B,IGFBP3,RECK,EMILIN1,ATP2B4,COL3A1,CDH11,DCN,PHLDB2,THY1,PODN,CD74,CORO1C,GJA1,MECP2,FRMD5,HRG,PTPN23,CORO1B,VCL,RHOA,APOE,DAB2IP,PTPRM	1.41693	0.364669	28	109
POLYOL BIOSYNTHETIC PROCESS%GOBP%GO:0046173	POLYOL BIOSYNTHETIC PROCESS%GOBP%GO:0046173	0.0179391	0.0779811	-1	PCK2,ITPKB,GBA,GOT1,PGP,ASAH1,QDPR	-1.61579	-0.607852	7	16
NEUTROPHIL DEGRANULATION%REACTOME%R-HSA-6798695.2	NEUTROPHIL DEGRANULATION%REACTOME%R-HSA-6798695.2	0.0179441	0.0779811	-1	SERPINA3,MGST1,ORM1,PRCP,SERPINA1,LGALS3,ORM2,IST1,ITGB2,FABP5,ITGAM,MAN2B1,ATP6V1D,HMOX2,CTSC,CSTB,CD53,HK3,PRDX6,CD14,GPI,IDH1,ALDOC,GSTP1,PSMD14,CD59,CTSA,PSAP,IMPDH1,CAB39,PTPN6,MANBA,NPC2,ALDOA,VAMP8,DYNLT1,FUCA1,PSMC2,FTH1,PSMB7,HP,PRKCD,OSTF1,A1BG,ACTR1B,PSMA2,PSMD7,PAFAH1B2,GMFG,MAPK14,HSPA1B,COTL1,CCT2,CTSZ,LRG1	-1.26331	-0.276528	55	315
RHO GTPASES ACTIVATE PKNS%REACTOME%R-HSA-5625740.1	RHO GTPASES ACTIVATE PKNS%REACTOME%R-HSA-5625740.1	0.0179629	0.0779811	1	MYH10,MYH11,NCOA2,RHOA,PPP1R12A,MYL6,MYH9,YWHAQ,YWHAH,PKN2,MYH14,KDM1A,MYL9,PKN1,PPP1R14A,RAC1,YWHAB	1.59373	0.539602	17	26
WARBURG EFFECT%SMPDB%SMP0086930	WARBURG EFFECT%SMPDB%SMP0086930	0.0182165	0.0789968	-1	GPI,IDH1,ALDOC,PGD,GSR,BCKDHB,MDH1,PFKM,ENO1,TALDO1,FH	-1.54297	-0.478927	11	34
NEUROTRANSMITTER SECRETION%GOBP%GO:0007269	NEUROTRANSMITTER SECRETION%GOBP%GO:0007269	0.0184049	0.0796427	1	STX4,SNCA,STX3,SNAP23,STX1A,CPLX1,PIP5K1C,UNC13B,SLC32A1,DNAJC5,STX11	1.5896	0.5441	11	25
SIGNAL RELEASE FROM SYNAPSE%GOBP%GO:0099643	SIGNAL RELEASE FROM SYNAPSE%GOBP%GO:0099643	0.0184049	0.0796427	1	STX4,SNCA,STX3,SNAP23,STX1A,CPLX1,PIP5K1C,UNC13B,SLC32A1,DNAJC5,STX11	1.5896	0.5441	11	25
ORGANELLE TRANSPORT ALONG MICROTUBULE%GOBP%GO:0072384	ORGANELLE TRANSPORT ALONG MICROTUBULE%GOBP%GO:0072384	0.0184598	0.0797947	1	FBXW11,BICD1,KIF13A,NDE1,KIFAP3,DYNC1H1,KIF3B,RAB6A,AP3B1,BLOC1S5,AP3D1,HTT,RAB1A,PEX14,NEFL,BLOC1S2,TMEM201,KIF3A,KIF5B,ACTR10,AP3S1,TRAK1,BLOC1S1	1.52127	0.459274	23	44
CONSTITUTIVE SIGNALING BY ABERRANT PI3K IN CANCER%REACTOME%R-HSA-2219530.1	CONSTITUTIVE SIGNALING BY ABERRANT PI3K IN CANCER%REACTOME%R-HSA-2219530.1	0.0185615	0.0801483	1	FYN,HBEGF,PDGFRB,PTPN11,GAB2,EGFR,RHOG,FGF1	1.60247	0.593169	8	18
B CELL DIFFERENTIATION%GOBP%GO:0030183	B CELL DIFFERENTIATION%GOBP%GO:0030183	0.0186288	0.0803528	1	NOTCH2,ADAM17,ITGB1,PTPN2,SLC25A5,TOP2B,PLCG2,TPD52,SLC39A7	1.59249	0.573171	9	20
PYRIMIDINE NUCLEOTIDE METABOLIC PROCESS%GOBP%GO:0006220	PYRIMIDINE NUCLEOTIDE METABOLIC PROCESS%GOBP%GO:0006220	0.0187693	0.0808726	1	UNG,DTYMK,ENTPD5,DHODH,PRPS1	1.60047	0.58449	5	19
REGULATION OF ACTIN FILAMENT LENGTH%GOBP%GO:0030832	REGULATION OF ACTIN FILAMENT LENGTH%GOBP%GO:0030832	0.018861	0.0810943	1	CTTN,DBNL,SVIL,FCHSD2,ESAM,DBN1,MYADM,ARHGAP35,LIMA1,GSN,CDC42EP1,LMOD2,SSH3,TRIOBP,NCK1,NCKAP1,NCK2,BIN1,CXCL12,FER,ARF6,VASP,CDC42EP3,LMOD1	1.46558	0.411693	24	65
REGULATION OF ACTIN POLYMERIZATION OR DEPOLYMERIZATION%GOBP%GO:0008064	REGULATION OF ACTIN POLYMERIZATION OR DEPOLYMERIZATION%GOBP%GO:0008064	0.018861	0.0810943	1	CTTN,DBNL,SVIL,FCHSD2,ESAM,DBN1,MYADM,ARHGAP35,LIMA1,GSN,CDC42EP1,LMOD2,SSH3,TRIOBP,NCK1,NCKAP1,NCK2,BIN1,CXCL12,FER,ARF6,VASP,CDC42EP3,LMOD1	1.46558	0.411693	24	65
PLC BETA MEDIATED EVENTS%REACTOME%R-HSA-112043.1	PLC BETA MEDIATED EVENTS%REACTOME%R-HSA-112043.1	0.018951	0.0813944	1	PLCB4,GNA14,CAMK2G,ITPR1,PDE1C,CAMK2B,ADCY9,GNA11,CAMK2A,GNAQ,ITPR3,CAMK2D,ITPR2,MAPK1	1.56826	0.51874	14	29
GENE EXPRESSION (TRANSCRIPTION)%REACTOME%R-HSA-74160.7	GENE EXPRESSION (TRANSCRIPTION)%REACTOME%R-HSA-74160.7	0.0190083	0.0815535	-1	FKBP5,PSME2,LGALS3,TRIAP1,SMARCD3,PSMA4,TXNRD1,CDK6,POLDIP3,NUP43,POLR2G,PSME1,TP53RK,SMARCE1,GPI,SKI,PSMD14,DEK,PSMB6,CCNT1,SNRPG,NELFCD,PSMA1,GTF3C5,CHM,PAPOLA,RABGGTA,CDK2,PSMB3,PSMA7,CSTF1,PSMB4,ACTL6A,PPP2CA,WWTR1,CASP6,PSMC2,PRDX1,PSMB7,MED23,PIP4K2C,PSMA6,KRBA1,MAGOH,PPP2CB,RGCC,PPP1R13B,DDX39A,GAMT,SMARCB1,TXN,RABGGTB,PSMB2,TSNAX,PSMA2,PSMD7,TIGAR,NCBP2,CDC40,SNRPD3,POLR2H,SMAD4,MAPK14,PS…	-1.20723	-0.25454	182	496
ENDOCYTIC RECYCLING%GOBP%GO:0032456	ENDOCYTIC RECYCLING%GOBP%GO:0032456	0.0191379	0.0820223	1	RAB35,RAB8B,VTI1A,STX16,EHD3,PTPN23,HGS,SCRIB,VPS52,RAB14,RAB8A,STX12,LMTK2,CCDC93	1.50796	0.450403	14	47
PID_A6B1_A6B4_INTEGRIN_PATHWAY%MSIGDB_C2%PID_A6B1_A6B4_INTEGRIN_PATHWAY	PID_A6B1_A6B4_INTEGRIN_PATHWAY%MSIGDB_C2%PID_A6B1_A6B4_INTEGRIN_PATHWAY	0.0191791	0.0821119	1	ITGB4,LAMB2,LAMA5,LAMA3,ITGB1,LAMA4,ITGA6,EGFR,RXRB,YWHAQ,LAMC1,GRB2,HRAS	1.58065	0.545258	13	24
MRNA 3'-END PROCESSING%REACTOME DATABASE ID RELEASE 81%72187	MRNA 3'-END PROCESSING%REACTOME DATABASE ID RELEASE 81%72187	0.0193059	0.0825668	-1	POLDIP3,PAPOLA,CSTF1,MAGOH,DDX39A,NCBP2,CDC40,NUDT21,CASC3,SRSF11,THOC3,FIP1L1,SRSF3,DHX38,CPSF7,WDR33,THOC6,PABPN1,NCBP1,SYMPK,SRSF6,SRSF5,PCF11,CPSF1,SARNP,SRSF7,CSTF2,EIF4A3,DDX39B,SRSF2,SRSF1	-1.49718	-0.432114	31	48
CYTOPLASMIC TRANSLATIONAL INITIATION%GOBP%GO:0002183	CYTOPLASMIC TRANSLATIONAL INITIATION%GOBP%GO:0002183	0.0193481	0.0826596	-1	EIF5,EIF4A1,NCBP2,EIF3I,EIF3F,EIF4A2,EIF3M,EIF2S3,EIF3J,DENR,EIF4B,DHX29,MCTS1,EIF2S2,NCBP1,EIF3D,EIF2B3,EIF4H	-1.55575	-0.498317	18	30
NICOTINIC ACETYLCHOLINE RECEPTOR SIGNALING PATHWAY%PANTHER PATHWAY%P00044	NICOTINIC ACETYLCHOLINE RECEPTOR SIGNALING PATHWAY%PANTHER PATHWAY%P00044	0.0193843	0.0827267	1	MYO1D,MYO18B,MYH10,MYH11,MYO1C,MYO18A,ACTB,MYH7B,ACTG1,MYH9,ACTA2,MYO6,MYH14,MYO1B	1.56779	0.521587	14	28
INORGANIC ANION TRANSPORT%GOBP%GO:0015698	INORGANIC ANION TRANSPORT%GOBP%GO:0015698	0.0194397	0.0828755	1	SLC4A1,ANO1,FXYD1,SLC20A2,ENPP1,SLC12A7,ANO6,SLC12A4,CLCN6,SLC25A3,ANO10,SLC25A30	1.55475	0.509444	12	30
HCMV LATE EVENTS%REACTOME%R-HSA-9610379.2	HCMV LATE EVENTS%REACTOME%R-HSA-9610379.2	0.0195745	0.083362	-1	NUP43,CHMP2B,CHMP2A,VPS25,VPS4A,SNF8,CHMP7,VPS37A,NUP155,VPS36,NUP50,MVB12A,CHMP3,TSG101,NUP160,NUP37,NUP35,NUP153,NUP85	-1.50989	-0.447315	19	42
SODIUM ION TRANSMEMBRANE TRANSPORT%GOBP%GO:0035725	SODIUM ION TRANSMEMBRANE TRANSPORT%GOBP%GO:0035725	0.0198115	0.0842825	1	PKD2,TRPM4,SLC9A1,SLC4A4,SCN7A,ANO6,ATP1B3,ATP1A3	1.59532	0.599522	8	17
RETT SYNDROME CAUSING GENES%WIKIPATHWAYS_20220510%WP4312%HOMO SAPIENS	RETT SYNDROME CAUSING GENES%WIKIPATHWAYS_20220510%WP4312%HOMO SAPIENS	0.0198815	0.084491	1	GNAO1,TCF4,NCOR2,TRRAP,TBL1XR1,HTT	1.61764	0.626567	6	15
POSITIVE REGULATION OF STRESS-ACTIVATED PROTEIN KINASE SIGNALING CASCADE%GOBP%GO:0070304	POSITIVE REGULATION OF STRESS-ACTIVATED PROTEIN KINASE SIGNALING CASCADE%GOBP%GO:0070304	0.0200713	0.0852079	1	MID1,TGFB2,TPD52L1,TAOK3,TAOK1,RELL1,STK25,APP,DAB2IP,FZD7,TRAF5,TAOK2,XIAP,IGFBP6,MAP3K5,LYN,HRAS	1.50828	0.464896	17	40
LATE PHASE OF HIV LIFE CYCLE%REACTOME DATABASE ID RELEASE 81%162599	LATE PHASE OF HIV LIFE CYCLE%REACTOME DATABASE ID RELEASE 81%162599	0.020202	0.0856727	-1	NUP43,POLR2G,CHMP2B,CCNT1,CHMP2A,NELFCD,VPS4A,NMT1,NCBP2,POLR2H,CHMP7,NEDD4L,VPS37A,NUP155,NELFE,VTA1,POLR2J,NUP50,MVB12A,CHMP3,NELFA,RNMT,TSG101,GTF2F1,NUP160,NCBP1,RANGAP1,NUP37,NUP35,ERCC3,POLR2A,NUP153,NUP85,SSRP1	-1.40566	-0.365604	34	83
POST-GOLGI VESICLE-MEDIATED TRANSPORT%GOBP%GO:0006892	POST-GOLGI VESICLE-MEDIATED TRANSPORT%GOBP%GO:0006892	0.0202703	0.0858718	1	RAB31,KIF13A,RBSN,RAB34,SPTBN1,EXOC2,VTI1A,GOLGA4,SNAP23,AP4M1,GOLGA7,EHD3,SORT1,LLGL1,ARFGEF2,RAB10,NSF,RABEP1,VPS52,RAB14,RP2,CCDC93,DNM2,EXOC6B,SCAMP1,EXOC5,AP3D1,EXOC4,EXOC1,MYO1B	1.45213	0.403058	30	69
RESPONSE TO DSRNA%GOBP%GO:0043331	RESPONSE TO DSRNA%GOBP%GO:0043331	0.0203533	0.0861331	1	MUL1,RFTN1,CAV1,FLOT1,TLR3,RALB,COLEC12	1.61399	0.616015	7	16
NEGATIVE REGULATION OF LYMPHOCYTE MEDIATED IMMUNITY%GOBP%GO:0002707	NEGATIVE REGULATION OF LYMPHOCYTE MEDIATED IMMUNITY%GOBP%GO:0002707	0.0203885	0.0861918	1	CD55,CD46,HLA-E,HLA-F,HLA-A,C4BPA	1.59148	0.598081	6	17
NEGATIVE REGULATION OF IMMUNE SYSTEM PROCESS%GOBP%GO:0002683	NEGATIVE REGULATION OF IMMUNE SYSTEM PROCESS%GOBP%GO:0002683	0.0204372	0.086307	1	CD55,TGFB2,ILDR2,MUL1,FYN,CD46,TGFB1,IL17D,EMILIN1,PIBF1,COL3A1,SMCR8,THY1,LRRC17,HLA-DRB1,AMBP,TGFB3,TLR3,SCRIB,INPP5D,PTPN2,GPNMB,LOXL3,GBP1,MKRN2,APCS,C1QC,CNOT7,PLCG1,FBN1,WASL,CXCL12,FER,LRCH1	1.4011	0.360074	34	110
NEURAL CREST CELL DEVELOPMENT%GOBP%GO:0014032	NEURAL CREST CELL DEVELOPMENT%GOBP%GO:0014032	0.0205108	0.086437	1	SEMA3D,SEMA5B,NRP1,SEMA3C,CORO1C,PHOX2B,PEF1,PDCD6,ANXA6,NOLC1,TCOF1	1.59276	0.581675	11	19
NEURAL CREST CELL DIFFERENTIATION%GOBP%GO:0014033	NEURAL CREST CELL DIFFERENTIATION%GOBP%GO:0014033	0.0205108	0.086437	1	SEMA3D,SEMA5B,NRP1,SEMA3C,CORO1C,PHOX2B,PEF1,PDCD6,ANXA6,NOLC1,TCOF1	1.59276	0.581675	11	19
REGULATION OF DENDRITIC SPINE DEVELOPMENT%GOBP%GO:0060998	REGULATION OF DENDRITIC SPINE DEVELOPMENT%GOBP%GO:0060998	0.0205453	0.0864919	1	DBNL,DBN1,CAMK2B,RELN,FMR1,PSEN1,APOE,ARF6	1.61059	0.614717	8	16
TOLL LIKE RECEPTOR 4 (TLR4) CASCADE%REACTOME%R-HSA-166016.2	TOLL LIKE RECEPTOR 4 (TLR4) CASCADE%REACTOME%R-HSA-166016.2	0.0205798	0.0865466	-1	S100B,RPS6KA1,ITGB2,ITGAM,SAA1,MAP2K1,UBE2V1,CD14,UBE2N,PPP2CA,PPP2CB,USP14,MAPK14,MAP2K4,MAPKAPK3,IRF3,LBP,FADD,PPP2R5D,TAB1,ECSIT	-1.43185	-0.382678	21	70
REGULATION OF TRANSLATION%GOBP%GO:0006417	REGULATION OF TRANSLATION%GOBP%GO:0006417	0.0206511	0.0867562	-1	RPS6KA1,EIF1,EIF4E,POLDIP3,POLR2G,CDC123,EIF5,SHMT1,LARP6,ZFP36L1,EIF2A,TIA1,FTO,DPH6,RPS9,PPP1CA,CNBP,METTL5,NCBP2,RPS6KB1,NT5C3B,C1QBP,ELP4,EIF5A2,EXOSC3,RPS4X,EIF2AK2,GSPT1,EEF2,EIF2S1,FOXO3,EIF4A2,EIF2S3,ELP6,RPS3,ETF1,DIS3L2,MTPN,SAMD4A,CALR,EIF4B,EIF5A,UQCC2,PDE12,EIF4EBP1,EXOSC9,USP16,DDX3X,HNRNPD,TRAP1,MTG1,RBM3,ELP2,ERBB2,EXOSC7,COA3,PKM	-1.29882	-0.299682	57	198
POSITIVE REGULATION OF STRESS-ACTIVATED MAPK CASCADE%GOBP%GO:0032874	POSITIVE REGULATION OF STRESS-ACTIVATED MAPK CASCADE%GOBP%GO:0032874	0.0206922	0.0868385	1	MID1,TGFB2,TPD52L1,TAOK3,TAOK1,RELL1,STK25,APP,DAB2IP,FZD7,TRAF5,TAOK2,XIAP,IGFBP6,MAP3K5	1.52849	0.473995	15	39
PROTEIN DEUBIQUITINATION%GOBP%GO:0016579	PROTEIN DEUBIQUITINATION%GOBP%GO:0016579	0.0207514	0.0869963	-1	OTUD4,PSMD14,USP8,COPS5,OTULIN,WDR48,USP14,USP10,SENP8,OTUB1,USP2,EIF3F,USP47,USP7,UCHL5,UCHL3,USP16,ENY2,USP19	-1.47568	-0.422505	19	50
HIV LIFE CYCLE%REACTOME%R-HSA-162587.3	HIV LIFE CYCLE%REACTOME%R-HSA-162587.3	0.0208614	0.0873608	-1	NUP43,POLR2G,CHMP2B,CCNT1,CHMP2A,NELFCD,VPS4A,NMT1,NCBP2,POLR2H,CHMP7,NEDD4L,VPS37A,NUP155,NELFE,VTA1,POLR2J,NUP50,MVB12A,XRCC5,CHMP3,NELFA,RNMT,XRCC6,TSG101,GTF2F1,NUP160,NCBP1,RANGAP1,NUP37,NUP35,ERCC3,POLR2A,NUP153,NUP85,SSRP1	-1.39397	-0.356701	36	91
OVERLAP BETWEEN SIGNAL TRANSDUCTION PATHWAYS CONTRIBUTING TO LMNA LAMINOPATHIES%WIKIPATHWAYS_20220510%WP4879%HOMO SAPIENS	OVERLAP BETWEEN SIGNAL TRANSDUCTION PATHWAYS CONTRIBUTING TO LMNA LAMINOPATHIES%WIKIPATHWAYS_20220510%WP4879%HOMO SAPIENS	0.0208817	0.0873608	1	TGFB1,AGO2,CDK4,SMAD2,CREBBP,CSNK1A1,LMNA,DICER1,EMD,LEMD3,APC,CTNNB1	1.587	0.587443	12	18
POSITIVE REGULATION OF AXONOGENESIS%GOBP%GO:0050772	POSITIVE REGULATION OF AXONOGENESIS%GOBP%GO:0050772	0.0209293	0.0874695	1	PLXNA1,DBNL,NRP1,DBN1,GOLGA4,PLXNB2,PLXNA2	1.60877	0.614022	7	16
AMIDE TRANSPORT%GOBP%GO:0042886	AMIDE TRANSPORT%GOBP%GO:0042886	0.0210856	0.0878934	-1	MGST1,PLTP,ABCC5,CPTP,PSAP,FOLR2,PARK7,CLEC4M	-1.56808	-0.537246	8	23
REGULATION OF SEQUESTERING OF CALCIUM ION%GOBP%GO:0051282	REGULATION OF SEQUESTERING OF CALCIUM ION%GOBP%GO:0051282	0.0211241	0.0878934	1	DMD,PKD2,FLNA,ITPR1,TRDN,JPH2,SNCA,THY1,ANXA6,CAMK2D,PLCG1,HRC,PLCG2,ITPR2,HTT,ATP1A2,GP1BB,CACNA1C,RYR2	1.51232	0.461806	19	42
ESTABLISHMENT OR MAINTENANCE OF BIPOLAR CELL POLARITY%GOBP%GO:0061245	ESTABLISHMENT OR MAINTENANCE OF BIPOLAR CELL POLARITY%GOBP%GO:0061245	0.0211254	0.0878934	1	ANK1,SLC9A3R1,DLG3,FSCN1,LLGL1,SCRIB,RHOA,DLG1	1.57905	0.568334	8	20
ESTABLISHMENT OR MAINTENANCE OF APICAL/BASAL CELL POLARITY%GOBP%GO:0035088	ESTABLISHMENT OR MAINTENANCE OF APICAL/BASAL CELL POLARITY%GOBP%GO:0035088	0.0211254	0.0878934	1	ANK1,SLC9A3R1,DLG3,FSCN1,LLGL1,SCRIB,RHOA,DLG1	1.57905	0.568334	8	20
ANTEROGRADE TRANS-SYNAPTIC SIGNALING%GOBP%GO:0098916	ANTEROGRADE TRANS-SYNAPTIC SIGNALING%GOBP%GO:0098916	0.0211833	0.0878934	1	STX4,FCHSD2,SNCA,HOMER1,PDLIM4,STX3,SNAP23,ERC1,STX1A,SLC12A7,MBP,CPLX1,SPG11,PIP5K1C,AKAP9,CNP,AMPH,APOE,SLC12A4,UNC13B,ATXN3,SLC32A1,DLG1,DNAJC5,STX11	1.44608	0.401379	25	69
CHEMICAL SYNAPTIC TRANSMISSION%GOBP%GO:0007268	CHEMICAL SYNAPTIC TRANSMISSION%GOBP%GO:0007268	0.0211833	0.0878934	1	STX4,FCHSD2,SNCA,HOMER1,PDLIM4,STX3,SNAP23,ERC1,STX1A,SLC12A7,MBP,CPLX1,SPG11,PIP5K1C,AKAP9,CNP,AMPH,APOE,SLC12A4,UNC13B,ATXN3,SLC32A1,DLG1,DNAJC5,STX11	1.44608	0.401379	25	69
TRANS-SYNAPTIC SIGNALING%GOBP%GO:0099537	TRANS-SYNAPTIC SIGNALING%GOBP%GO:0099537	0.0211833	0.0878934	1	STX4,FCHSD2,SNCA,HOMER1,PDLIM4,STX3,SNAP23,ERC1,STX1A,SLC12A7,MBP,CPLX1,SPG11,PIP5K1C,AKAP9,CNP,AMPH,APOE,SLC12A4,UNC13B,ATXN3,SLC32A1,DLG1,DNAJC5,STX11	1.44608	0.401379	25	69
HEXOSE BIOSYNTHETIC PROCESS%GOBP%GO:0019319	HEXOSE BIOSYNTHETIC PROCESS%GOBP%GO:0019319	0.0212766	0.0881896	-1	PCK2,GPI,PFKFB1,RBP4,TPI1,AKR1B1	-1.59641	-0.600562	6	16
HEMOSTASIS%GOBP%GO:0007599	HEMOSTASIS%GOBP%GO:0007599	0.0213348	0.0883087	1	HBB,ENTPD1,ACTN1,RAP2B,ITGB3,FLNA,PF4,COL3A1,F11,F13B,CD9,TLN1,HRG,CSRP1,GNAS,VKORC1,GNAQ,ANO6,VCL,ACTB,VAV2,PLAT,ILK,ACTG1,MYH9,FGG,MYL12A,PLCG2	1.44959	0.397914	28	73
REGULATION OF SMALL MOLECULE METABOLIC PROCESS%GOBP%GO:0062012	REGULATION OF SMALL MOLECULE METABOLIC PROCESS%GOBP%GO:0062012	0.0213491	0.0883087	1	C1QTNF3,APOC1,NCOR2,CAV1,CDA,ATP2B4,PRKAG1,IGF2,PIBF1,SNCA,PRKAA2,MTOR,DNAJC30,BAD,RPTOR,APOA4,CD74,INSR,SLC4A4,ZBTB20,H6PD,LPGAT1,PSEN1,APP,PTPN2,APOE,SORBS1,ERLIN2,PDK3,PRKAA1,ERLIN1,FGF1,NOS3,ABCD2,MLYCD,LPCAT3	1.41131	0.369622	36	98
NUCLEOSIDE TRIPHOSPHATE BIOSYNTHETIC PROCESS%GOBP%GO:0009142	NUCLEOSIDE TRIPHOSPHATE BIOSYNTHETIC PROCESS%GOBP%GO:0009142	0.0213845	0.0883543	-1	NDUFS7,NDUFA12,IMPDH1,ALDOA,NDUFA10,NDUFB7,NDUFA6,AK1,NDUFAB1,CMPK2,NDUFV2,NDUFB3,NDUFA5,IMPDH2,NDUFB9,NDUFS3,NDUFA11,MT-ND1,NDUFA9,MT-ATP6,NDUFS6,NDUFS1,NDUFS8,NDUFS4,NDUFB6,NDUFC2,NDUFS2,NDUFV1,NDUFB8,NME2,NDUFB4,AK4,NDUFA2,NDUFS5,NDUFA1,AK3,NDUFA8,UCK1,NUDT2,CMPK1	-1.43942	-0.388842	40	66
NUCLEOSIDE DIPHOSPHATE METABOLIC PROCESS%GOBP%GO:0009132	NUCLEOSIDE DIPHOSPHATE METABOLIC PROCESS%GOBP%GO:0009132	0.0214087	0.0883543	-1	ENO3,HK3,GPI,ALDOC,FOXK2,ALDOA,PFKM,PFKFB1,ENO1,NUDT18,AK1,LDHA,PGAM2,CMPK2,RRM2B,TPI1	-1.4923	-0.447203	16	40
POSITIVE REGULATION OF PROTEIN KINASE B SIGNALING%GOBP%GO:0051897	POSITIVE REGULATION OF PROTEIN KINASE B SIGNALING%GOBP%GO:0051897	0.0214259	0.0883543	1	IGF1R,RTN4,TGFB1,HBEGF,IGF2,HIP1,INSR,ITGB1,RICTOR,FERMT2,EGFR,PTK2,MYOC	1.53086	0.483598	13	36
M PHASE%REACTOME DATABASE ID RELEASE 81%68886	M PHASE%REACTOME DATABASE ID RELEASE 81%68886	0.021797	0.0897931	-1	CLASP2,PSME2,IST1,PSMA4,NUP43,PSME1,PSMD14,ARPP19,PSMB6,CHMP2B,PPP1CC,CHMP2A,PSMA1,PSMB3,PSMA7,PSMB4,PPP2CA,PSMC2,PSMB7,PSMA6,PPP2CB,SIRT2,VPS4A,PSMB2,PSMA2,PSMD7,CHMP7,TUBB2B,NEK7,GORASP2,PSMB8,PSMA3,PCM1,PSMD5,PPP2R2D,NUP155,SMC2,PAFAH1B1,PSMC1,NUDC,PPP2R5D,NME7,RPS27,PPP2R5C,ODF2,PPP2R2A,NUP50,ENSA,PSMC5,PPP2R1A,TUBGCP5,PSMD1,DYNC1LI1,CHMP3,SPAST,YWHAE,PSMB10,ACTR1A,DCTN3,PPP2R5E,USO1,NUP160,C…	-1.2929	-0.298106	77	199
FLT3 SIGNALING IN DISEASE%REACTOME%R-HSA-9682385.2	FLT3 SIGNALING IN DISEASE%REACTOME%R-HSA-9682385.2	0.022312	0.0918206	1	SPTBN1,CBL,STAT5B,MYO18A,PTPN11,TRIP11,GAB2,GOLGB1,GRB2,ETV6,HRAS	1.58092	0.594109	11	17
NUCLEUS LOCALIZATION%GOBP%GO:0051647	NUCLEUS LOCALIZATION%GOBP%GO:0051647	0.0224654	0.0923579	1	FBXW11,SLC9A3R1,LMNB1,DOCK7,MTOR,DYNC1H1,LMNA	1.59479	0.608686	7	16
METABOLISM OF VITAMINS AND COFACTORS%REACTOME%R-HSA-196854.6	METABOLISM OF VITAMINS AND COFACTORS%REACTOME%R-HSA-196854.6	0.022541	0.0925741	-1	RETSAT,FASN,BTD,MTHFD2,ACACB,MOCS2,MTHFR,SHMT1,IDH1,MTHFD2L,NAMPT,AASDHPPT,FOLR2,NADSYN1,RBP1,BCO2,COQ6,AOX1,MCCC2,HLCS,LRP10,MOCS3,COQ9,GPHN,ALDH1L1,RBP4,RFK,PCCB,RNLS	-1.36695	-0.343978	29	102
INSULIN PATHWAY%PATHWAY INTERACTION DATABASE NCI-NATURE CURATED DATA%INSULIN PATHWAY	INSULIN PATHWAY%PATHWAY INTERACTION DATABASE NCI-NATURE CURATED DATA%INSULIN PATHWAY	0.0227273	0.0932442	1	CAV1,EXOC2,PTPRA,INSR,CBL,PTPN11,INPP5D,RAPGEF1,EXOC7,EXOC3,SORBS1,NCK1,NCK2,EXOC5,EXOC4,EXOC1,GRB2	1.51157	0.474832	17	37
FCERI MEDIATED CA+2 MOBILIZATION%REACTOME%R-HSA-2871809.1	FCERI MEDIATED CA+2 MOBILIZATION%REACTOME%R-HSA-2871809.1	0.0230085	0.0943021	1	ITPR1,VAV2,ITPR3,PLCG1,PLCG2,ITPR2,LYN	1.57654	0.583572	7	18
MEMORY%GOBP%GO:0007613	MEMORY%GOBP%GO:0007613	0.0230459	0.0943595	1	PTN,INSR,SLC2A4,PSEN1,CIC,APOE,MAP1A	1.5701	0.565112	7	20
CORTICOTROPIN-RELEASING HORMONE SIGNALING PATHWAY%WIKIPATHWAYS_20220510%WP2355%HOMO SAPIENS	CORTICOTROPIN-RELEASING HORMONE SIGNALING PATHWAY%WIKIPATHWAYS_20220510%WP2355%HOMO SAPIENS	0.0231377	0.0945955	1	GNAO1,TCF4,TGFB1,GNAI1,ECE1,PRKAA2,GNA11,CAMK2A,GNAS,GNAQ,RAF1,PLCG2,MAPK1,MAP3K5,RELA	1.51466	0.469707	15	39
NADP METABOLIC PROCESS%GOBP%GO:0006739	NADP METABOLIC PROCESS%GOBP%GO:0006739	0.0231932	0.0945955	-1	IDH2,IDH1,PGD,MDH1,TALDO1,ALDH1L1,ME1,RBKS	-1.57661	-0.545803	8	22
MEIOSIS%REACTOME%R-HSA-1500620.2	MEIOSIS%REACTOME%R-HSA-1500620.2	0.0231974	0.0945955	1	HSPA2,MLH1,LMNB1,CDK4,STAG2	1.5603	0.550537	5	22
POSITIVE REGULATION OF PHOSPHATIDYLINOSITOL 3-KINASE SIGNALING%GOBP%GO:0014068	POSITIVE REGULATION OF PHOSPHATIDYLINOSITOL 3-KINASE SIGNALING%GOBP%GO:0014068	0.0231974	0.0945955	1	IGF1R,TGFB2,ROR1,DCN,PDGFRB,INSR,CBL,PTK2,MYOC,FLT1	1.55983	0.550372	10	22
POSITIVE REGULATION OF HORMONE SECRETION%GOBP%GO:0046887	POSITIVE REGULATION OF HORMONE SECRETION%GOBP%GO:0046887	0.023229	0.094629	1	C1QTNF3,ANO1,STX4,MCU,TRPM4,GLUD1,BAD,HLA-DRB1,VAMP7,ACSL4,FGG,FGB,FGA	1.57035	0.558222	13	21
TRANSCRIPTION-COUPLED NUCLEOTIDE EXCISION REPAIR (TC-NER)%REACTOME%R-HSA-6781827.1	TRANSCRIPTION-COUPLED NUCLEOTIDE EXCISION REPAIR (TC-NER)%REACTOME%R-HSA-6781827.1	0.0232956	0.0948043	-1	COPS2,POLR2G,COPS8,ERCC1,COPS5,COPS4,POLR2H,COPS6,CUL4B,COPS3,USP7,GPS1,POLR2J,PCNA,RBX1,EP300,RPA3,ISY1,COPS7A	-1.49251	-0.439916	19	43
GLYCOLIPID BIOSYNTHETIC PROCESS%GOBP%GO:0009247	GLYCOLIPID BIOSYNTHETIC PROCESS%GOBP%GO:0009247	0.0237048	0.0963726	1	DPM3,PIGN,DPM1	1.59379	0.617332	3	15
METABOLISM OF STEROIDS%REACTOME DATABASE ID RELEASE 81%8957322	METABOLISM OF STEROIDS%REACTOME DATABASE ID RELEASE 81%8957322	0.0237833	0.0965942	-1	PMVK,FASN,SMARCD3,ACACB,MVD,OSBPL1A,GGPS1,MVK,FDPS,FDX1,GC,HSD17B4,AKR1D1,IDI1,SUMO2,CYP7B1,ACOT8,AKR1B1,ACAT2,NFYC,SRD5A3,AKR1C1,AKR1C3,SERPINA6,LGMN	-1.42858	-0.386829	25	65
MAP KINASE ACTIVATION%REACTOME DATABASE ID RELEASE 81%450294	MAP KINASE ACTIVATION%REACTOME DATABASE ID RELEASE 81%450294	0.0240659	0.0975454	-1	RPS6KA1,MAP2K1,UBE2V1,UBE2N,PPP2CA,PPP2CB,MAPK14,MAP2K4,MAPKAPK3,PPP2R5D,TAB1,RPS6KA5	-1.52626	-0.481851	12	32
INTERLEUKIN-17 SIGNALING%REACTOME DATABASE ID RELEASE 81%448424	INTERLEUKIN-17 SIGNALING%REACTOME DATABASE ID RELEASE 81%448424	0.0240659	0.0975454	-1	RPS6KA1,MAP2K1,UBE2V1,UBE2N,PPP2CA,PPP2CB,MAPK14,MAP2K4,MAPKAPK3,PPP2R5D,TAB1,RPS6KA5	-1.52626	-0.481851	12	32
PID_P73PATHWAY%MSIGDB_C2%PID_P73PATHWAY	PID_P73PATHWAY%MSIGDB_C2%PID_P73PATHWAY	0.0242565	0.0982193	-1	RCHY1,SERPINA1,FASN,CDK6,CDK2,PFDN5,MAPK14	-1.55677	-0.512992	7	27
SIGNAL RELEASE%GOBP%GO:0023061	SIGNAL RELEASE%GOBP%GO:0023061	0.0244272	0.0988113	1	STX4,CAMK2G,SNCA,STX3,SNAP23,STX1A,RAB11FIP5,CPLX1,PIP5K1C,UNC13B,SLC32A1,DNAJC5,STX11	1.52317	0.486414	13	34
RND2 GTPASE CYCLE%REACTOME DATABASE ID RELEASE 81%9696270	RND2 GTPASE CYCLE%REACTOME DATABASE ID RELEASE 81%9696270	0.0245399	0.0990772	1	ARHGAP1,ALDH3A2,CAV1,DST,KIDINS220,GOLGA3,ARHGAP35,SCRIB	1.54679	0.529448	8	25
NEGATIVE REGULATION OF CELL MIGRATION%GOBP%GO:0030336	NEGATIVE REGULATION OF CELL MIGRATION%GOBP%GO:0030336	0.0245421	0.0990772	1	DAG1,IGFBP5,DPYSL3,TGFB1,RAP2B,IGFBP3,RECK,EMILIN1,ATP2B4,COL3A1,CDH11,DCN,PHLDB2,THY1,PODN,CD74,CORO1C,GJA1,MECP2,HRG,PTPN23,CORO1B,VCL,RHOA,APOE,DAB2IP,PTPRM	1.3904	0.359708	27	105
PROTEASOMAL PROTEIN CATABOLIC PROCESS%GOBP%GO:0010498	PROTEASOMAL PROTEIN CATABOLIC PROCESS%GOBP%GO:0010498	0.0246972	0.0996039	-1	DERL1,PSMA4,PCNP,UBE2G1,ASB2,ADRM1,PSMD14,PSMB6,UBE2K,PSMA1,PSMB3,PSMA7,PSMB4,PSMC2,PSMB7,SHARPIN,PSMA6,UBXN2B,SIRT2,PSMB2,PSMA2,PSMD7,AMN1,GSK3A,PSMB8,PSMA3,NEDD4L,FAF1,UBE2B,FBXL18,CUL4B,PSMC1,CLGN,ARMC8,NEDD4,CUL2,UBR3,CALR,RBCK1,UBXN1,WDR26,DCAF11,PPP2R5C	-1.30588	-0.304044	43	180
POSITIVE REGULATION OF HISTONE MODIFICATION%GOBP%GO:0031058	POSITIVE REGULATION OF HISTONE MODIFICATION%GOBP%GO:0031058	0.0249947	0.100703	-1	AKAP8L,PIH1D1,UBE2N,DEK,SMARCB1,AKAP8,SMAD4,RUVBL2,GLYR1,OGT,C6ORF89,CTR9,BAZ1B	-1.51198	-0.469307	13	34
AUTOPHAGY%WIKIPATHWAYS_20220510%WP4923%HOMO SAPIENS	AUTOPHAGY%WIKIPATHWAYS_20220510%WP4923%HOMO SAPIENS	0.0253456	0.101925	1	PRKAG1,PRKAA2,MTOR,PRKAB2,RB1CC1,PRKAB1,PIK3R4,PRKAA1	1.57653	0.601716	8	16
RNA EXPORT FROM NUCLEUS%GOBP%GO:0006405	RNA EXPORT FROM NUCLEUS%GOBP%GO:0006405	0.0253583	0.101925	-1	POLDIP3,DDX19B,MAGOH,DDX39A,DDX19A,NCBP2,AGFG1,NUP155,SSB,PCID2,CASC3,THOC3,SRSF3,ENY2,NXF1,THOC6,PABPN1,NUP160,NCBP1,XPOT,NUP153,NUP85,IWS1,NPM1,HNRNPA1,NOL6,SARNP,EIF4A3,DDX39B,NUP133	-1.42991	-0.396698	30	58
TOLL LIKE RECEPTOR TLR1:TLR2 CASCADE%REACTOME%R-HSA-168179.1	TOLL LIKE RECEPTOR TLR1:TLR2 CASCADE%REACTOME%R-HSA-168179.1	0.0254498	0.101925	-1	S100B,RPS6KA1,SAA1,MAP2K1,UBE2V1,CD14,UBE2N,PPP2CA,PPP2CB,USP14,MAPK14,MAP2K4,MAPKAPK3	-1.44543	-0.404169	13	56
TOLL LIKE RECEPTOR 2 (TLR2) CASCADE%REACTOME%R-HSA-181438.1	TOLL LIKE RECEPTOR 2 (TLR2) CASCADE%REACTOME%R-HSA-181438.1	0.0254498	0.101925	-1	S100B,RPS6KA1,SAA1,MAP2K1,UBE2V1,CD14,UBE2N,PPP2CA,PPP2CB,USP14,MAPK14,MAP2K4,MAPKAPK3	-1.44543	-0.404169	13	56
TOLL LIKE RECEPTOR TLR6:TLR2 CASCADE%REACTOME%R-HSA-168188.1	TOLL LIKE RECEPTOR TLR6:TLR2 CASCADE%REACTOME%R-HSA-168188.1	0.0254498	0.101925	-1	S100B,RPS6KA1,SAA1,MAP2K1,UBE2V1,CD14,UBE2N,PPP2CA,PPP2CB,USP14,MAPK14,MAP2K4,MAPKAPK3	-1.44543	-0.404169	13	56
MYD88:MAL(TIRAP) CASCADE INITIATED ON PLASMA MEMBRANE%REACTOME DATABASE ID RELEASE 81%166058	MYD88:MAL(TIRAP) CASCADE INITIATED ON PLASMA MEMBRANE%REACTOME DATABASE ID RELEASE 81%166058	0.0254498	0.101925	-1	S100B,RPS6KA1,SAA1,MAP2K1,UBE2V1,CD14,UBE2N,PPP2CA,PPP2CB,USP14,MAPK14,MAP2K4,MAPKAPK3	-1.44543	-0.404169	13	56
RESPONSE TO ORGANIC CYCLIC COMPOUND%GOBP%GO:0014070	RESPONSE TO ORGANIC CYCLIC COMPOUND%GOBP%GO:0014070	0.0255642	0.102207	1	TGM2,IGFBP5,TGFB2,MUL1,GNAO1,GNA14,TGFB1,RFTN1,PKD2,CAV1,FLNA,ATP2B4,SLC9A1,GNAI1,SNCA,NT5E,ENPP1,RAP1B,GNA11,SMAD2,DMTN,STAT5B,GNAS,FLOT1,TGFB3,TLR3,AKAP9,FAM210B,UBE3A,RALB,ACTB,RAPGEF1	1.34556	0.333242	32	145
NEGATIVE REGULATION OF GROWTH%GOBP%GO:0045926	NEGATIVE REGULATION OF GROWTH%GOBP%GO:0045926	0.0255708	0.102207	1	RTN4,TGFB2,DACT3,MUL1,SEMA3D,DCBLD2,TGFB1,CDA,SEMA5B,MAP2,ENPP1,SEMA3C,GJA1,CDKN2AIP,HRG	1.45517	0.41512	15	59
D-<I>MYO< I>-INOSITOL (1,4,5)-TRISPHOSPHATE BIOSYNTHESIS%BIOCYC%PWY-6351	D-<I>MYO< I>-INOSITOL (1,4,5)-TRISPHOSPHATE BIOSYNTHESIS%BIOCYC%PWY-6351	0.0256165	0.102289	1	PLCB4,CDIPT,PI4KA,PI4K2A,PIP5K1C,PLCD3,PLCD1,PLCG1,PLCG2	1.58835	0.615224	9	15
PATHOGENIC ESCHERICHIA COLI INFECTION%WIKIPATHWAYS_20220510%WP2272%HOMO SAPIENS	PATHOGENIC ESCHERICHIA COLI INFECTION%WIKIPATHWAYS_20220510%WP2272%HOMO SAPIENS	0.0256943	0.102498	1	TUBB8,FYN,TUBB1,ROCK1,ITGB1,TUBB4B,TUBB,TUBA8,TUBA1A,NCK1,ACTG1,YWHAQ,NCK2,ARHGEF2,WASL,TUBA4A,ARPC5	1.50707	0.478717	17	35
NEGATIVE REGULATION OF TRANSMEMBRANE RECEPTOR PROTEIN SERINE/THREONINE KINASE SIGNALING PATHWAY%GOBP%GO:0090101	NEGATIVE REGULATION OF TRANSMEMBRANE RECEPTOR PROTEIN SERINE/THREONINE KINASE SIGNALING PATHWAY%GOBP%GO:0090101	0.0257713	0.102703	1	LTBP1,CILP,CRIM1,EMILIN1,CAV1,ADAM17,ASPN,PBLD,FAM89B,FBN2,LEMD2,HDAC2,CHRD,FBN1	1.49898	0.464842	14	39
VESICLE ORGANIZATION%GOBP%GO:0016050	VESICLE ORGANIZATION%GOBP%GO:0016050	0.0258665	0.102981	1	RNF26,STX4,BET1,YIPF4,CAV1,KIF13A,RAB34,DYSF,SNCA,CAV2,RAB8B,TRAPPC3,VTI1A,YIPF5,SEC31A,STAM,STX3,DNM1,CORO1C,SNAP23,PEF1,STX16,STX1A,ANXA2,PI4K2A,PDCD6,SORT1,ZFYVE16,SEC24B,ARFGEF2,MYO18A,CUL3,TGFBRAP1,SEC22B,VAMP3,HGS,PLEKHM1,VPS41,EEA1,DNAJC13,APOE,UNC13B,RAB14,RAB8A,STX12,STX7,VAMP7,STX11,AP3B1,VAPA,STX10,PREB,SEC23A,TRAPPC9,PICALM,CHMP5,VPS18,BLOC1S5,WASL,AP3D1,HOOK2,SEC24A,VPS33A	1.3151	0.314953	63	187
CELL CYCLE, MITOTIC%REACTOME DATABASE ID RELEASE 81%69278	CELL CYCLE, MITOTIC%REACTOME DATABASE ID RELEASE 81%69278	0.0261194	0.103885	-1	CLASP2,PSME2,IST1,PSMA4,CDK6,NUP43,PSME1,PSMD14,ARPP19,PSMB6,CHMP2B,PPP1CC,PPME1,MCM4,CHMP2A,PSMA1,CDK2,PSMB3,PSMA7,PSMB4,PPP2CA,PSMC2,PSMB7,PSMA6,PPP2CB,SIRT2,VPS4A,PSMB2,PSMA2,PSMD7,CHMP7,TUBB2B,NEK7,GORASP2,PSMB8,PSMA3,PCM1,PSMD5,PPP2R2D,NUP155,SMC2,PAFAH1B1,FBXL18,PSMC1,DYRK1A,NUDC,PPP2R5D,LCMT1,NME7,ORC4,RPS27,PPP2R5C,ODF2,PCNA,PPP2R2A,RBX1,NUP50,ENSA,EP300,PSMC5,PPP2R1A,RPA3,TUBGCP5,PSMD1,D…	-1.26034	-0.283956	91	244
REGULATION OF TRANSPORTER ACTIVITY%GOBP%GO:0032409	REGULATION OF TRANSPORTER ACTIVITY%GOBP%GO:0032409	0.0262166	0.104169	1	DMD,CACNA2D1,UTRN,PKD2,FXYD1,SLC9A3R1,CAV1,TRDN,JPH2,SLC9A1,PPP3CC,SNCA,SLMAP,HOMER1,PLN,RELN,ACTN4,ITGB1,FMR1,ATP1B3,AKAP9,APP,AHNAK,ACTB,DLG1,STIM1,ACE2,NPPA,FHL1,YWHAH,CAMK2D,HRC	1.39173	0.365898	32	95
REGULATION OF RECEPTOR-MEDIATED ENDOCYTOSIS%GOBP%GO:0048259	REGULATION OF RECEPTOR-MEDIATED ENDOCYTOSIS%GOBP%GO:0048259	0.0264472	0.104982	1	BICD1,APOC1,ITGB3,ITGAV,HIP1,INSR,ANXA2,CBL,FMR1,FLOT1,PSEN1,APP,ANKRD13D,AAK1,ARRB1,PICALM,WASL,BMP2K,ARF6,CLU	1.46361	0.432479	20	49
PURINE NUCLEOTIDES <I>DE NOVO< I> BIOSYNTHESIS%BIOCYC%PWY-841	PURINE NUCLEOTIDES <I>DE NOVO< I> BIOSYNTHESIS%BIOCYC%PWY-841	0.0264859	0.105032	-1	IMPDH1,PFAS,ADSL,AK1,GMPS,RRM2B,IMPDH2,GART,NME7,NME1	-1.55006	-0.551783	10	20
POLYOL METABOLIC PROCESS%GOBP%GO:0019751	POLYOL METABOLIC PROCESS%GOBP%GO:0019751	0.0266836	0.105712	-1	IMPA2,PCK2,ITPKB,NUDT4,GBA,ITPK1,GOT1,PGP,PTEN,TPI1,ASAH1,QDPR,IMPA1,INPP5J,GK2	-1.47819	-0.449868	15	37
REGULATION OF IGF ACTIVITY BY IGFBP%REACTOME DATABASE ID RELEASE 81%381426	REGULATION OF IGF ACTIVITY BY IGFBP%REACTOME DATABASE ID RELEASE 81%381426	0.0267808	0.105993	1	SDC2,IGFBP5,MFGE8,LAMB2,IGFBP7,IGFBP3,LTBP1,VCAN,VWA1,IGF2,SERPIND1,SPP2,APP,APOE,STC2,IGFALS,APLP2,HRC,LAMC1,FBN1,PRKCSH,APOB,FGG,IGFBP6	1.42655	0.393791	24	71
TUMOR SUPPRESSOR ACTIVITY OF SMARCB1%WIKIPATHWAYS_20220510%WP4204%HOMO SAPIENS	TUMOR SUPPRESSOR ACTIVITY OF SMARCB1%WIKIPATHWAYS_20220510%WP4204%HOMO SAPIENS	0.0268288	0.106042	-1	SMARCD3,CDK6,SMARCE1,ACTL6A	-1.5673	-0.600743	4	15
PROTEIN-CONTAINING COMPLEX DISASSEMBLY%GOBP%GO:0032984	PROTEIN-CONTAINING COMPLEX DISASSEMBLY%GOBP%GO:0032984	0.0268456	0.106042	-1	IST1,SMARCD3,SMARCE1,CHMP2B,CHMP2A,VAMP8,PPP1CA,NOSTRIN,VPS4A,SMARCB1,CHMP7,ATP2A2,EPG5,GSPT1,TFIP11,KATNB1,ABCE1,APEH,ETF1,VTA1,RPL23,DSTN,SMARCC1,SH3GL2	-1.37983	-0.356804	24	85
REGULATION OF DENDRITE MORPHOGENESIS%GOBP%GO:0048814	REGULATION OF DENDRITE MORPHOGENESIS%GOBP%GO:0048814	0.0268869	0.106101	1	SDC2,DBNL,DBN1,CAMK2B,SS18L1,RELN,SARM1,YWHAH,CUL7	1.55276	0.558871	9	20
REGULATED EXOCYTOSIS%GOBP%GO:0045055	REGULATED EXOCYTOSIS%GOBP%GO:0045055	0.027088	0.10679	1	SYNGR1,STX4,RAB31,SNCA,STX3,SNAP23,STX1A,DMTN,RAB11FIP5,S100A13,CPLX1,RAB10,PIP5K1C,UNC13B,VAMP7,DNAJC5,STX11,MYH9	1.4897	0.461965	18	39
POSITIVE REGULATION OF GROWTH%GOBP%GO:0045927	POSITIVE REGULATION OF GROWTH%GOBP%GO:0045927	0.0272594	0.107361	1	TGFB2,RFTN1,AGRN,DBNL,ADAM17,NRP1,MTOR,DBN1,RPTOR,GOLGA4,INSR,CDKN2AIP,RICTOR,CSNK2A1,EGFR,SUPV3L1	1.42474	0.398946	16	66
MAPK TARGETS NUCLEAR EVENTS MEDIATED BY MAP KINASES%REACTOME DATABASE ID RELEASE 81%450282	MAPK TARGETS NUCLEAR EVENTS MEDIATED BY MAP KINASES%REACTOME DATABASE ID RELEASE 81%450282	0.0276672	0.108706	-1	RPS6KA1,PPP2CA,PPP2CB,MAPK14,PPP2R5D,RPS6KA5,PPP2R1A,MAPKAPK2,DUSP3	-1.56617	-0.600309	9	15
REGULATION OF TRANSMEMBRANE RECEPTOR PROTEIN SERINE/THREONINE KINASE SIGNALING PATHWAY%GOBP%GO:0090092	REGULATION OF TRANSMEMBRANE RECEPTOR PROTEIN SERINE/THREONINE KINASE SIGNALING PATHWAY%GOBP%GO:0090092	0.027722	0.108706	1	TGFB2,TGFB1,LTBP1,INHBE,CILP,CRIM1,EMILIN1,CAV1,ADAM17,ASPN,LTBP4,PBLD,FAM89B,SMAD2,TGFB3,FBN2,CREBBP,LEMD2	1.42067	0.393231	18	70
INFLUENZA INFECTION%REACTOME DATABASE ID RELEASE 81%168255	INFLUENZA INFECTION%REACTOME DATABASE ID RELEASE 81%168255	0.0277393	0.108706	-1	KPNA2,RPS15A,NUP43,POLR2G,RPS13,RPS18,RPS9,RPS16,RPS7,POLR2H,RPS4X,EIF2AK2,RPS17,RPLP2,NUP155,RPS12,RPS3,RPS20,RPS24,RPL23,CALR,KPNA3,POLR2J,RPS27,RPSA,RPS21,NUP50,RPS15,RPS2,RPS29,RPS5,RPLP0,PABPN1,GTF2F1,NUP160,HSP90AA1,RPL18A,RPS19,RPL37,NUP37,NUP35,POLR2A,NUP153,NUP85,RPL37A,RPL8,RPL34,RPLP1,PARP1,RPL5,RPS28,RPL3L,RPL27A,RPS11,GTF2F2,NUP133,ISG15,RPL12,RPL13,RPL29,RPL35A,RPS10,RAN,RPL11,RPL10…	-1.31831	-0.318999	71	134
REGULATION OF HEMOSTASIS%GOBP%GO:1900046	REGULATION OF HEMOSTASIS%GOBP%GO:1900046	0.0278673	0.108706	1	EMILIN1,CAV1,KLKB1,F11,FAP,CD9,SERPINE2,DMTN,HRG,ANO6,APOE,PLAT,NOS3,FGG,FGB	1.50787	0.484506	15	33
REGULATION OF BLOOD COAGULATION%GOBP%GO:0030193	REGULATION OF BLOOD COAGULATION%GOBP%GO:0030193	0.0278673	0.108706	1	EMILIN1,CAV1,KLKB1,F11,FAP,CD9,SERPINE2,DMTN,HRG,ANO6,APOE,PLAT,NOS3,FGG,FGB	1.50787	0.484506	15	33
PROPANOATE METABOLISM%SMPDB%SMP0000016	PROPANOATE METABOLISM%SMPDB%SMP0000016	0.0278992	0.108706	-1	ACSS3,ALDH6A1,ACAT1,BCKDHB,ECHS1,PCCB,BCKDHA	-1.56311	-0.577822	7	17
MALONIC ACIDURIA%SMPDB%SMP0000198	MALONIC ACIDURIA%SMPDB%SMP0000198	0.0278992	0.108706	-1	ACSS3,ALDH6A1,ACAT1,BCKDHB,ECHS1,PCCB,BCKDHA	-1.56311	-0.577822	7	17
METHYLMALONIC ACIDURIA DUE TO COBALAMIN-RELATED DISORDERS%PATHWHIZ%PW000208	METHYLMALONIC ACIDURIA DUE TO COBALAMIN-RELATED DISORDERS%PATHWHIZ%PW000208	0.0278992	0.108706	-1	ACSS3,ALDH6A1,ACAT1,BCKDHB,ECHS1,PCCB,BCKDHA	-1.56311	-0.577822	7	17
MALONYL-COA DECARBOXYLASE DEFICIENCY%PATHWHIZ%PW000478	MALONYL-COA DECARBOXYLASE DEFICIENCY%PATHWHIZ%PW000478	0.0278992	0.108706	-1	ACSS3,ALDH6A1,ACAT1,BCKDHB,ECHS1,PCCB,BCKDHA	-1.56311	-0.577822	7	17
PROCESSING OF INTRONLESS PRE-MRNAS%REACTOME DATABASE ID RELEASE 81%77595	PROCESSING OF INTRONLESS PRE-MRNAS%REACTOME DATABASE ID RELEASE 81%77595	0.0278992	0.108706	-1	PAPOLA,CSTF1,NCBP2,NUDT21,FIP1L1,CPSF7,WDR33,PABPN1,NCBP1,SYMPK,PCF11,CPSF1,CSTF2	-1.5606	-0.576895	13	17
VACUOLAR ACIDIFICATION%GOBP%GO:0007035	VACUOLAR ACIDIFICATION%GOBP%GO:0007035	0.0278992	0.108706	-1	DMXL2,ATP6V1D,DMXL1,PPT1,ATP6V0D1,CLN5,ATP6V1H,ATP6V1F,ATP6AP2	-1.56392	-0.578122	9	17
SULFUR AMINO ACID METABOLISM%REACTOME DATABASE ID RELEASE 81%1614635	SULFUR AMINO ACID METABOLISM%REACTOME DATABASE ID RELEASE 81%1614635	0.0279503	0.108706	-1	ETHE1,MPST,TXN2,TST,GOT1,ADI1,MRI1,SUOX	-1.56521	-0.56965	8	18
POSITIVE REGULATION OF VASCULATURE DEVELOPMENT%GOBP%GO:1904018	POSITIVE REGULATION OF VASCULATURE DEVELOPMENT%GOBP%GO:1904018	0.0279785	0.108706	1	TNFSF12,TJP1,AGO2,RRAS,PTGIS,ECM1,PDCD6,ITGB1,STIM1,PRKD2,FGF1,NOS3,S100A1,FLT1,PLCG1	1.46574	0.438847	15	46
POSITIVE REGULATION OF ANGIOGENESIS%GOBP%GO:0045766	POSITIVE REGULATION OF ANGIOGENESIS%GOBP%GO:0045766	0.0279785	0.108706	1	TNFSF12,TJP1,AGO2,RRAS,PTGIS,ECM1,PDCD6,ITGB1,STIM1,PRKD2,FGF1,NOS3,S100A1,FLT1,PLCG1	1.46574	0.438847	15	46
MRNA SPLICING%REACTOME%R-HSA-72172.3	MRNA SPLICING%REACTOME%R-HSA-72172.3	0.0280702	0.108853	-1	PPIL1,CD2BP2,POLR2G,SNRPG,PAPOLA,CSTF1,SNRPB2,MAGOH,PPIH,NCBP2,CDC40,SNRPD3,POLR2H,SNRPA1,PPWD1,SNRPF,TXNL4A,NUDT21,DHX15,CCAR1,PPIL3,SF3A2,LSM4,TFIP11,CASC3,PRPF40A,LSM2,CTNNBL1,SRSF11,LSM7,GPKOW,POLR2J,SNRPE,FIP1L1,SRSF3,HNRNPD,SRSF10,DNAJC8,DHX38,SNRPC,SNRPN,CPSF7,WDR33,HNRNPH1,HNRNPH2,ISY1,SNW1,PABPN1,SNRPA,PPIL4,GTF2F1,HNRNPF,PQBP1,NCBP1,PRPF31,SYMPK,SRSF6,SRSF5,POLR2A,RBM5,HNRNPA1,USP39,PCF…	-1.30277	-0.307828	64	159
PRE-MRNA SPLICING%REACTOME DATABASE ID RELEASE 81%72163	PRE-MRNA SPLICING%REACTOME DATABASE ID RELEASE 81%72163	0.0280702	0.108853	-1	PPIL1,CD2BP2,POLR2G,SNRPG,PAPOLA,CSTF1,SNRPB2,MAGOH,PPIH,NCBP2,CDC40,SNRPD3,POLR2H,SNRPA1,PPWD1,SNRPF,TXNL4A,NUDT21,DHX15,CCAR1,PPIL3,SF3A2,LSM4,TFIP11,CASC3,PRPF40A,LSM2,CTNNBL1,SRSF11,LSM7,GPKOW,POLR2J,SNRPE,FIP1L1,SRSF3,HNRNPD,SRSF10,DNAJC8,DHX38,SNRPC,SNRPN,CPSF7,WDR33,HNRNPH1,HNRNPH2,ISY1,SNW1,PABPN1,SNRPA,PPIL4,GTF2F1,HNRNPF,PQBP1,NCBP1,PRPF31,SYMPK,SRSF6,SRSF5,POLR2A,RBM5,HNRNPA1,USP39,PCF…	-1.30277	-0.307828	64	159
P75 NTR RECEPTOR-MEDIATED SIGNALLING%REACTOME%R-HSA-193704.1	P75 NTR RECEPTOR-MEDIATED SIGNALLING%REACTOME%R-HSA-193704.1	0.0281117	0.108909	1	RTN4,ADAM17,ARHGEF12,KALRN,BAD,AKAP13,PSEN1,ARHGEF40,RHOA,VAV2,HDAC2,GNA13,ARHGEF2,ARHGEF11,HDAC3,OBSCN,RELA,ARHGEF17	1.45531	0.430026	18	49
PDGFR-ALPHA SIGNALING PATHWAY%PATHWAY INTERACTION DATABASE NCI-NATURE CURATED DATA%PDGFR-ALPHA SIGNALING PATHWAY	PDGFR-ALPHA SIGNALING PATHWAY%PATHWAY INTERACTION DATABASE NCI-NATURE CURATED DATA%PDGFR-ALPHA SIGNALING PATHWAY	0.028484	0.110246	1	CAV1,ITGAV,SHB,RAPGEF1,CSNK2A1,PLCG1,GRB2	1.57626	0.610543	7	15
COMPLEMENT SYSTEM IN NEURONAL DEVELOPMENT AND PLASTICITY%WIKIPATHWAYS_20220510%WP5090%HOMO SAPIENS	COMPLEMENT SYSTEM IN NEURONAL DEVELOPMENT AND PLASTICITY%WIKIPATHWAYS_20220510%WP5090%HOMO SAPIENS	0.0286139	0.110642	1	CD55,COLEC10,CFP,CD46,TGFB1,ITGB3,ITGAV,MARK1,CFD,MBP,SCRIB,PROS1	1.45431	0.43438	12	47
NEGATIVE REGULATION OF NEURON PROJECTION DEVELOPMENT%GOBP%GO:0010977	NEGATIVE REGULATION OF NEURON PROJECTION DEVELOPMENT%GOBP%GO:0010977	0.0287577	0.110964	1	RTN4,SEMA3D,DPYSL3,PTPN9,SEMA5B,THY1,MAP2,SEMA3C	1.5314	0.52418	8	25
INORGANIC CATION IMPORT ACROSS PLASMA MEMBRANE%GOBP%GO:0098659	INORGANIC CATION IMPORT ACROSS PLASMA MEMBRANE%GOBP%GO:0098659	0.0287797	0.110964	1	TRPV2,CACNA2D1,TRPM4,ATP2B4,SLC9A1,SLC12A7,ATP1B3,SLC12A4,ATP1A3	1.53367	0.53427	9	23
INORGANIC ION IMPORT ACROSS PLASMA MEMBRANE%GOBP%GO:0099587	INORGANIC ION IMPORT ACROSS PLASMA MEMBRANE%GOBP%GO:0099587	0.0287797	0.110964	1	TRPV2,CACNA2D1,TRPM4,ATP2B4,SLC9A1,SLC12A7,ATP1B3,SLC12A4,ATP1A3	1.53367	0.53427	9	23
INORGANIC ANION TRANSMEMBRANE TRANSPORT%GOBP%GO:0098661	INORGANIC ANION TRANSMEMBRANE TRANSPORT%GOBP%GO:0098661	0.0288313	0.111057	1	SLC4A1,ANO1,SLC20A2,SLC12A7,ANO6,SLC12A4,SLC25A3,SLC25A30	1.55243	0.566946	8	19
CALCIUM REGULATION IN CARDIAC CELLS%WIKIPATHWAYS_20220510%WP536%HOMO SAPIENS	CALCIUM REGULATION IN CARDIAC CELLS%WIKIPATHWAYS_20220510%WP536%HOMO SAPIENS	0.0289454	0.11139	1	GNAO1,CAMK2G,GNAI1,ADCY9,PLN,GNA11,CAMK2A,GNAS,ATP2B1,GNAQ,ANXA6,ATP1B3,RGS6,GJA3,YWHAQ,CAMK2D,ITPR2,RGS10,CACNA1C,RYR2,GRK5,ATP2B3,GNB1,RYR1,GNG5,ATP1B1,PRKCA,PLCB3	1.4532	0.427958	28	50
VESICLE DOCKING INVOLVED IN EXOCYTOSIS%GOBP%GO:0006904	VESICLE DOCKING INVOLVED IN EXOCYTOSIS%GOBP%GO:0006904	0.0290464	0.111672	1	EXOC2,RAB8B,RAB10,VAMP3,EXOC7,UNC13B,EXOC3,RAB8A,VPS18,EXOC6B,EXOC5,EXOC4,EXOC1,VTI1B,RAB13,STXBP1	1.53363	0.519253	16	26
NEGATIVE REGULATION OF CELL COMMUNICATION%GOBP%GO:0010648	NEGATIVE REGULATION OF CELL COMMUNICATION%GOBP%GO:0010648	0.0291451	0.111945	1	IGF1R,HEG1,C1QTNF3,DAG1,IGFBP5,EGFL7,TGFB2,DACT3,BICD1,MUL1,CD46,IGFBP3,LTBP1,UACA,PIK3IP1,SLC9A3R1,CILP,ITGA1,CRIM1,NCOR2,EMILIN1,CAV1,ITPR1,ATP2B4,PF4,PIBF1,SLC25A6,ADAM17,ASPN,SNCA,TAOK3,DCN,PRKAA2,PBLD,FAM89B,ITGAV,THY1,ENPP1,MYADM,CSNK2A2,BCL2L2,GHITM,RAP1B,CD74,ARHGAP35,HOMER2,GJA1,CBL,RAB11FIP5,AMBP,CD44,PDCD6,AJUBA,HRG,FMR1,STMN1,CUL3,FBN2,CSNK1A1,HGS,HOMER3,INPP5D,LEMD2,KCTD10,TPBG,SLC35…	1.22985	0.27361	119	398
REGULATION OF CALCIUM ION TRANSMEMBRANE TRANSPORTER ACTIVITY%GOBP%GO:1901019	REGULATION OF CALCIUM ION TRANSMEMBRANE TRANSPORTER ACTIVITY%GOBP%GO:1901019	0.0294896	0.11316	1	DMD,CACNA2D1,PKD2,TRDN,JPH2,SLC9A1,PPP3CC,PLN,FMR1,AHNAK,STIM1,NPPA,CAMK2D,HRC,HTT,ATP1A2	1.4771	0.460602	16	38
DETECTION OF ABIOTIC STIMULUS%GOBP%GO:0009582	DETECTION OF ABIOTIC STIMULUS%GOBP%GO:0009582	0.0300134	0.114952	1	ANO1,PKD2,GNA11,PIEZO1,GNAQ,PTK2,TTN,CSRP3,CTNNB1,CDH2,PITPNM1	1.56296	0.605389	11	15
DETECTION OF EXTERNAL STIMULUS%GOBP%GO:0009581	DETECTION OF EXTERNAL STIMULUS%GOBP%GO:0009581	0.0300134	0.114952	1	ANO1,PKD2,GNA11,PIEZO1,GNAQ,PTK2,TTN,CSRP3,CTNNB1,CDH2,PITPNM1	1.56296	0.605389	11	15
POSITIVE REGULATION OF CHROMOSOME ORGANIZATION%GOBP%GO:2001252	POSITIVE REGULATION OF CHROMOSOME ORGANIZATION%GOBP%GO:2001252	0.0301346	0.115306	-1	CDK2,ERCC1,SSBP1,NEK7,PPHLN1,CCT2,CCT4,SMC2,CCT7,HNRNPD,XRCC5,GNL3,CCT3,MORC2	-1.45738	-0.429561	14	43
TOLL LIKE RECEPTOR 10 (TLR10) CASCADE%REACTOME DATABASE ID RELEASE 81%168142	TOLL LIKE RECEPTOR 10 (TLR10) CASCADE%REACTOME DATABASE ID RELEASE 81%168142	0.0303688	0.115671	-1	S100B,RPS6KA1,SAA1,MAP2K1,UBE2V1,UBE2N,PPP2CA,PPP2CB,USP14,MAPK14,MAP2K4,MAPKAPK3,PPP2R5D,TAB1,ECSIT	-1.44393	-0.416744	15	48
MYD88 CASCADE INITIATED ON PLASMA MEMBRANE%REACTOME DATABASE ID RELEASE 81%975871	MYD88 CASCADE INITIATED ON PLASMA MEMBRANE%REACTOME DATABASE ID RELEASE 81%975871	0.0303688	0.115671	-1	S100B,RPS6KA1,SAA1,MAP2K1,UBE2V1,UBE2N,PPP2CA,PPP2CB,USP14,MAPK14,MAP2K4,MAPKAPK3,PPP2R5D,TAB1,ECSIT	-1.44393	-0.416744	15	48
TOLL LIKE RECEPTOR 5 (TLR5) CASCADE%REACTOME DATABASE ID RELEASE 81%168176	TOLL LIKE RECEPTOR 5 (TLR5) CASCADE%REACTOME DATABASE ID RELEASE 81%168176	0.0303688	0.115671	-1	S100B,RPS6KA1,SAA1,MAP2K1,UBE2V1,UBE2N,PPP2CA,PPP2CB,USP14,MAPK14,MAP2K4,MAPKAPK3,PPP2R5D,TAB1,ECSIT	-1.44393	-0.416744	15	48
MULTIVESICULAR BODY ORGANIZATION%GOBP%GO:0036257	MULTIVESICULAR BODY ORGANIZATION%GOBP%GO:0036257	0.0303733	0.115671	-1	IST1,CHMP2B,CHMP2A,VPS25,VPS4A,SNF8,CHMP7,VPS37A,VTA1,VPS36,CHMP1B,MVB12A,CHMP3,TSG101	-1.51277	-0.498494	14	27
MULTIVESICULAR BODY ASSEMBLY%GOBP%GO:0036258	MULTIVESICULAR BODY ASSEMBLY%GOBP%GO:0036258	0.0303733	0.115671	-1	IST1,CHMP2B,CHMP2A,VPS25,VPS4A,SNF8,CHMP7,VPS37A,VTA1,VPS36,CHMP1B,MVB12A,CHMP3,TSG101	-1.51277	-0.498494	14	27
ENDOPLASMIC RETICULUM TO GOLGI VESICLE-MEDIATED TRANSPORT%GOBP%GO:0006888	ENDOPLASMIC RETICULUM TO GOLGI VESICLE-MEDIATED TRANSPORT%GOBP%GO:0006888	0.0305606	0.115937	1	ANK1,BET1,YIPF4,ATL3,TRAPPC3,VTI1A,YIPF5,SEC31A,PEF1,USE1,PDCD6,ERGIC1,BCAP31,SEC24B,CUL3,NRBP2,SEC22B,TRIP11,BCAP29,LMAN2,VAMP7,VAPA,PREB,SEC23A,TRAPPC9,RAB2A,SEC24A,RAB1A,HYOU1	1.3958	0.3725	29	86
POSITIVE REGULATION OF EPITHELIAL CELL MIGRATION%GOBP%GO:0010634	POSITIVE REGULATION OF EPITHELIAL CELL MIGRATION%GOBP%GO:0010634	0.0305805	0.115937	1	RTN4,TGFB2,RIN2,TGFB1,RRAS,ITGB3,GLIPR2,SRPX2,ADAM17,NRP1,MTOR,MAPRE2,MAP4K4,PDCD6,IQSEC1,PRKD2,DOCK5,FGF1,NOS3,PTK2,CLASP1,DOCK1,PLCG1,PLCG2,ARF6	1.41658	0.39793	25	65
NEGATIVE REGULATION OF EXOCYTOSIS%GOBP%GO:0045920	NEGATIVE REGULATION OF EXOCYTOSIS%GOBP%GO:0045920	0.0305828	0.115937	1	SNCA,ATP9A,SMCR8,RAP1B,FMR1,RAB33B	1.54535	0.580744	6	17
REGULATION OF PATHWAY-RESTRICTED SMAD PROTEIN PHOSPHORYLATION%GOBP%GO:0060393	REGULATION OF PATHWAY-RESTRICTED SMAD PROTEIN PHOSPHORYLATION%GOBP%GO:0060393	0.0305869	0.115937	1	TGFB2,TGFB1,INHBE,EMILIN1,TGFB3	1.56121	0.60471	5	15
RHO GTPASE EFFECTORS%REACTOME DATABASE ID RELEASE 81%195258	RHO GTPASE EFFECTORS%REACTOME DATABASE ID RELEASE 81%195258	0.030587	0.115937	1	CTTN,MYH10,ABI1,WIPF3,FMNL3,CENPC,FLNA,DAAM1,CENPA,MYH11,CYFIP1,NDE1,TAOK1,NCOA2,KLC4,ROCK1,MYLK,ITGB1,ACTR3,RHOA,DYNC1H1,ACTB,ACTR2,PPP1R12A,NCKIPSD,MYL6,PIK3R4,NCK1,NCKAP1,ACTG1,RHOG,MYH9,YWHAQ,PTK2,CLASP1,YWHAH,BUB3,PKN2,WIPF2,WASL,ARPC5,MYH14,IQGAP1,CKAP5,MAPK1,KDM1A	1.33603	0.332347	46	140
BUDDING AND MATURATION OF HIV VIRION%REACTOME%R-HSA-162588.2	BUDDING AND MATURATION OF HIV VIRION%REACTOME%R-HSA-162588.2	0.0306697	0.116142	-1	CHMP2B,CHMP2A,VPS4A,CHMP7,NEDD4L,VPS37A,VTA1,MVB12A,CHMP3,TSG101	-1.52555	-0.536615	10	21
REGULATION OF ION TRANSMEMBRANE TRANSPORTER ACTIVITY%GOBP%GO:0032412	REGULATION OF ION TRANSMEMBRANE TRANSPORTER ACTIVITY%GOBP%GO:0032412	0.0307025	0.116157	1	DMD,CACNA2D1,UTRN,PKD2,FXYD1,SLC9A3R1,CAV1,TRDN,JPH2,SLC9A1,PPP3CC,SLMAP,HOMER1,PLN,RELN,ACTN4,ITGB1,FMR1,ATP1B3,AKAP9,APP,AHNAK,DLG1,STIM1,NPPA,FHL1,YWHAH,CAMK2D,HRC	1.39258	0.371065	29	87
RNA PHOSPHODIESTER BOND HYDROLYSIS%GOBP%GO:0090501	RNA PHOSPHODIESTER BOND HYDROLYSIS%GOBP%GO:0090501	0.030789	0.116375	-1	NOL9,NCBP2,EXOSC3,NUDT21,ELAC2,NUDT16,LACTB2,CPSF6,RRS1,BMS1,PDE12,FIP1L1,EXOSC9,RPS21,EXOSC7,EXOSC10,CPSF7,RNASE1,ERI3,NCBP1,POP1,PCF11,CPSF1,CSTF2,NOP9,PARN	-1.45097	-0.432407	26	41
DNA DAMAGE RECOGNITION IN GG-NER%REACTOME DATABASE ID RELEASE 81%5696394	DNA DAMAGE RECOGNITION IN GG-NER%REACTOME DATABASE ID RELEASE 81%5696394	0.0308977	0.116676	-1	COPS2,COPS8,ACTL6A,RUVBL1,COPS5,COPS4,COPS6,CUL4B,COPS3,GPS1,RBX1	-1.52485	-0.522436	11	23
PTEN REGULATION%REACTOME%R-HSA-6807070.2	PTEN REGULATION%REACTOME%R-HSA-6807070.2	0.0309556	0.116786	-1	PSME2,PSMA4,PSME1,PSMD14,PSMB6,PSMA1,PSMB3,PSMA7,PSMB4,PSMC2,PSMB7,PSMA6,PSMB2,PSMA2,PSMD7,PSMB8,PSMA3,PSMD5,PTEN,PSMC1,USP7,NEDD4	-1.35553	-0.346866	22	91
NEPHROTIC SYNDROME%WIKIPATHWAYS_20220510%WP4758%HOMO SAPIENS	NEPHROTIC SYNDROME%WIKIPATHWAYS_20220510%WP4758%HOMO SAPIENS	0.0311533	0.117312	1	ITGB4,LAMB2,ACTN4,SYNPO,COL4A3,LMNA,MYH9	1.54257	0.563346	7	19
NEGATIVE REGULATION OF LEUKOCYTE MEDIATED IMMUNITY%GOBP%GO:0002704	NEGATIVE REGULATION OF LEUKOCYTE MEDIATED IMMUNITY%GOBP%GO:0002704	0.0311533	0.117312	1	CD55,CD46,HLA-E,HLA-F,HLA-A,C4BPA	1.54384	0.563809	6	19
PID_ECADHERIN_STABILIZATION_PATHWAY%MSIGDB_C2%PID_ECADHERIN_STABILIZATION_PATHWAY	PID_ECADHERIN_STABILIZATION_PATHWAY%MSIGDB_C2%PID_ECADHERIN_STABILIZATION_PATHWAY	0.0313165	0.117816	1	IGF1R,ACTN1,LIMA1,ROCK1,PIP5K1C,NCK1,EGFR,NCKAP1,MYO6,ARF6,VASP,EXOC4	1.52624	0.538521	12	22
REGULATION OF COAGULATION%GOBP%GO:0050818	REGULATION OF COAGULATION%GOBP%GO:0050818	0.0314334	0.118036	1	EMILIN1,CAV1,KLKB1,F11,FAP,CD9,SERPINE2,DMTN,HRG,ANO6,APOE,PLAT,NOS3,FGG,FGB,FGA,PROCR,F3	1.48628	0.474632	18	34
PYRIMIDINE-CONTAINING COMPOUND METABOLIC PROCESS%GOBP%GO:0072527	PYRIMIDINE-CONTAINING COMPOUND METABOLIC PROCESS%GOBP%GO:0072527	0.0314334	0.118036	1	UNG,DTYMK,DPYSL3,ENTPD5,CDA,TK2,DHODH,PRPS1,DPYSL2	1.48642	0.474677	9	34
POSITIVE REGULATION OF ENDOCYTOSIS%GOBP%GO:0045807	POSITIVE REGULATION OF ENDOCYTOSIS%GOBP%GO:0045807	0.0316027	0.118562	1	BICD1,RAB31,SNCA,HIP1,INSR,ANXA2,CBL,TOR1A,FMR1,FLOT1,ANO6,APOE,ARRB1,WASL,PLCG2,CLU	1.46912	0.455582	16	39
RIBOSOMAL LARGE SUBUNIT ASSEMBLY%GOBP%GO:0000027	RIBOSOMAL LARGE SUBUNIT ASSEMBLY%GOBP%GO:0000027	0.0316469	0.118617	-1	BRIX1,MDN1,NOP2,RRS1,RPLP0,FASTKD2,DDX28,RPL5,NLE1,MRPL20,RPL11,RPL6	-1.54538	-0.57127	12	17
REGULATION OF CYTOKINE PRODUCTION INVOLVED IN IMMUNE RESPONSE%GOBP%GO:0002718	REGULATION OF CYTOKINE PRODUCTION INVOLVED IN IMMUNE RESPONSE%GOBP%GO:0002718	0.0318496	0.119257	1	CD55,TGFB2,TGFB1,TRPM4,CD74,TGFB3,CD81,PLCG2,GPRC5B,HLA-E,HLA-F,APOA2,HLA-A	1.51876	0.529076	13	23
ISOPRENOID METABOLIC PROCESS%GOBP%GO:0006720	ISOPRENOID METABOLIC PROCESS%GOBP%GO:0006720	0.0318767	0.119257	-1	PMVK,RETSAT,MVD,HMGCR,GGPS1,MVK,FDPS,RBP1,BCO2,HMGCS2,IDI1,ADH1B,SCPEP1,RBP4,AKR1B1,ALDH1A1,SRD5A3,AKR1C1,AKR1C3	-1.49336	-0.471466	19	32
CA2+ PATHWAY%REACTOME DATABASE ID RELEASE 81%4086398	CA2+ PATHWAY%REACTOME DATABASE ID RELEASE 81%4086398	0.0321232	0.120067	1	GNAO1,AGO2,ITPR1,CAMK2A,AGO1,ITPR3,MOV10,ITPR2,CTNNB1,GNB1,GNG5,PRKCA,PLCB3	1.51729	0.508363	13	27
UBIQUITIN PROTEASOME PATHWAY%PANTHER PATHWAY%P00060	UBIQUITIN PROTEASOME PATHWAY%PANTHER PATHWAY%P00060	0.0323321	0.12063	-1	UBE2G1,UBE2N,UBE2K,UBE2V2,UBE2D4,UBE2B,UBA3,UBA2	-1.54291	-0.580434	8	16
NEGATIVE REGULATION OF PEPTIDASE ACTIVITY%GOBP%GO:0010466	NEGATIVE REGULATION OF PEPTIDASE ACTIVITY%GOBP%GO:0010466	0.0323717	0.12063	-1	SERPINA3,SERPINA1,RPS6KA1,TRIAP1,PIH1D1,CSTB,PARK7,AGT,SERPINA7,TIMP1,IGBP1,SERPING1,PAK2,SERPINA10,PCID2,USP47,CTSB,SERPINB1,UBXN1,PLAUR,KNG1,SERPINF2,CAST,DDX3X,SERPINA6	-1.38984	-0.376338	25	65
TRIF(TICAM1)-MEDIATED TLR4 SIGNALING%REACTOME%R-HSA-937061.2	TRIF(TICAM1)-MEDIATED TLR4 SIGNALING%REACTOME%R-HSA-937061.2	0.0324206	0.12063	-1	S100B,RPS6KA1,SAA1,MAP2K1,UBE2V1,CD14,UBE2N,PPP2CA,PPP2CB,USP14,MAPK14,MAP2K4,MAPKAPK3,IRF3,FADD,PPP2R5D,TAB1	-1.40917	-0.395048	17	55
MYD88-INDEPENDENT TLR4 CASCADE%REACTOME%R-HSA-166166.2	MYD88-INDEPENDENT TLR4 CASCADE%REACTOME%R-HSA-166166.2	0.0324206	0.12063	-1	S100B,RPS6KA1,SAA1,MAP2K1,UBE2V1,CD14,UBE2N,PPP2CA,PPP2CB,USP14,MAPK14,MAP2K4,MAPKAPK3,IRF3,FADD,PPP2R5D,TAB1	-1.40917	-0.395048	17	55
NEGATIVE REGULATION OF SECRETION%GOBP%GO:0051048	NEGATIVE REGULATION OF SECRETION%GOBP%GO:0051048	0.0324232	0.12063	1	RHBDF1,SNCA,ATP9A,SMCR8,RAP1B,CD74,GJA1,RAB11FIP5,FMR1,RAB33B,VAMP3,APOE	1.47018	0.46443	12	36
MRNA EXPORT FROM NUCLEUS%GOBP%GO:0006406	MRNA EXPORT FROM NUCLEUS%GOBP%GO:0006406	0.0325501	0.12099	-1	POLDIP3,DDX19B,MAGOH,DDX39A,DDX19A,NCBP2,AGFG1,PCID2,CASC3,THOC3,SRSF3,ENY2,NXF1,THOC6,PABPN1,NUP160,NCBP1,NUP85,IWS1,SARNP,EIF4A3,DDX39B,NUP133	-1.43739	-0.422184	23	44
NEGATIVE REGULATION OF SIGNALING%GOBP%GO:0023057	NEGATIVE REGULATION OF SIGNALING%GOBP%GO:0023057	0.0329724	0.122343	1	IGF1R,HEG1,C1QTNF3,DAG1,IGFBP5,EGFL7,TGFB2,DACT3,BICD1,MUL1,CD46,IGFBP3,LTBP1,UACA,PIK3IP1,SLC9A3R1,CILP,ITGA1,CRIM1,NCOR2,EMILIN1,CAV1,ITPR1,ATP2B4,PF4,PIBF1,SLC25A6,ADAM17,ASPN,SNCA,TAOK3,DCN,PRKAA2,PBLD,FAM89B,ITGAV,THY1,ENPP1,MYADM,CSNK2A2,BCL2L2,GHITM,RAP1B,CD74,ARHGAP35,HOMER2,GJA1,CBL,RAB11FIP5,AMBP,CD44,PDCD6,AJUBA,HRG,FMR1,STMN1,CUL3,FBN2,CSNK1A1,HGS,HOMER3,INPP5D,LEMD2,KCTD10,TPBG,SLC35…	1.22427	0.272176	119	402
RRNA METABOLIC PROCESS%GOBP%GO:0016072	RRNA METABOLIC PROCESS%GOBP%GO:0016072	0.0329746	0.122343	-1	PIN4,PIH1D1,NOL9,GTF3C5,WDR36,DDX47,UTP15,TRMT112,RPS16,RPS7,METTL5,TFB1M,EXOSC3,MDN1,RPS17,SPIN1,NOP2,XRN2,MRTO4,TSR2,RPS24,RRS1,BMS1,RPS27,UTP6,EXOSC9,RPS21,FBL,RPS15,EXOSC7,DDX49,EXOSC10,DDX18,ERI3,GTF3C6,RPS19,RRP9,EIF6,WDR12,NIFK,NOL6,RPL5,RPS28,HEATR1,TFB2M,NOL11,TSR3,EXOSC6,NOP9,RPL35A,RRP1,RPL11,RRP12,EMG1,RPL10A,NSUN4,RPL27	-1.32181	-0.328469	57	112
ALPHA 6 BETA 4 SIGNALING PATHWAY%WIKIPATHWAYS_20220510%WP244%HOMO SAPIENS	ALPHA 6 BETA 4 SIGNALING PATHWAY%WIKIPATHWAYS_20220510%WP244%HOMO SAPIENS	0.0330198	0.122398	1	ITGB4,LAMB2,LAMA5,MTOR,LAMA3,PTPN11,ITGA6,LAMC1,MAPK1,GRB2,HRAS	1.52877	0.543442	11	21
GENERIC TRANSCRIPTION PATHWAY%REACTOME DATABASE ID RELEASE 81%212436	GENERIC TRANSCRIPTION PATHWAY%REACTOME DATABASE ID RELEASE 81%212436	0.0331056	0.122532	-1	FKBP5,PSME2,LGALS3,TRIAP1,SMARCD3,PSMA4,TXNRD1,CDK6,POLR2G,PSME1,TP53RK,SMARCE1,GPI,SKI,PSMD14,DEK,PSMB6,CCNT1,NELFCD,PSMA1,CHM,RABGGTA,CDK2,PSMB3,PSMA7,PSMB4,ACTL6A,PPP2CA,WWTR1,CASP6,PSMC2,PRDX1,PSMB7,MED23,PIP4K2C,PSMA6,KRBA1,PPP2CB,RGCC,PPP1R13B,GAMT,SMARCB1,TXN,RABGGTB,PSMB2,PSMA2,PSMD7,TIGAR,POLR2H,SMAD4,MAPK14,PSMB8,PSMA3,NOTCH1,PTPN1,NEDD4L,PSMD5,PTEN,TRIM63,FOXO3,USP2,RRM2B,NOP2,PSMC1,HD…	-1.21013	-0.262095	68	359
DEMETHYLATION%GOBP%GO:0070988	DEMETHYLATION%GOBP%GO:0070988	0.0331167	0.122532	-1	APOBEC2,JMJD6,PPME1,FTO,ALKBH3,APEX1,MMACHC,KDM8	-1.54689	-0.592918	8	15
OPIOID SIGNALLING%REACTOME DATABASE ID RELEASE 81%111885	OPIOID SIGNALLING%REACTOME DATABASE ID RELEASE 81%111885	0.0331492	0.12254	1	PLCB4,GNA14,CAMK2G,ITPR1,GNAI1,PPP3CC,PDE1C,GNAI2,CAMK2B,ADCY9,GNA11,CAMK2A,GNAQ	1.43769	0.418147	13	53
REGULATION OF MITOCHONDRIAL FISSION%GOBP%GO:0090140	REGULATION OF MITOCHONDRIAL FISSION%GOBP%GO:0090140	0.0332632	0.122849	1	MUL1,MCU,SPIRE1,DCN,RALBP1	1.54721	0.59929	5	15
CYCLIC-NUCLEOTIDE-MEDIATED SIGNALING%GOBP%GO:0019935	CYCLIC-NUCLEOTIDE-MEDIATED SIGNALING%GOBP%GO:0019935	0.0333751	0.123149	-1	PDE2A,NUDT4,PDE4D,PDE3A,CAP2,GUCY1A2,PDE7A	-1.53949	-0.579148	7	16
HISTONE MODIFICATION%GOBP%GO:0016570	HISTONE MODIFICATION%GOBP%GO:0016570	0.0334709	0.123389	-1	NAA40,JMJD6,UBE2N,HAT1,ACTL6A,RUVBL1,SMYD3,PARK7,SIRT2,TRMT112,MIER3,DMAP1,NTMT1,RUVBL2,UBE2B,OGT,CUL4B,HDAC6,USP7,NFYC,NAA50,RNF20,DPY30,CTR9,USP16,ENY2,FBL,DTX3L,EP300,RCOR3,WDR5,MBD3,LEO1,BRCC3,KDM8,N6AMT1	-1.31918	-0.328562	36	109
PROTEIN-DNA COMPLEX DISASSEMBLY%GOBP%GO:0032986	PROTEIN-DNA COMPLEX DISASSEMBLY%GOBP%GO:0032986	0.0337455	0.123919	-1	SMARCD3,SMARCE1,SMARCB1,RPL23,SMARCC1	-1.5416	-0.590893	5	15
TRNA METHYLATION%GOBP%GO:0030488	TRNA METHYLATION%GOBP%GO:0030488	0.0337455	0.123919	-1	TRMT6,TRMT1,WDR6,TRMT112,TRMT61B,METTL2A,THUMPD3,NSUN6	-1.54071	-0.59055	8	15
RESPONSE TO HEXOSE%GOBP%GO:0009746	RESPONSE TO HEXOSE%GOBP%GO:0009746	0.0337682	0.123919	1	IGF1R,PRKAA2,RAB11FIP5,ZBTB20,PFKL,EIF2B5,UNC13B,PDK3,PRKAA1	1.5127	0.526964	9	23
RESPONSE TO MONOSACCHARIDE%GOBP%GO:0034284	RESPONSE TO MONOSACCHARIDE%GOBP%GO:0034284	0.0337682	0.123919	1	IGF1R,PRKAA2,RAB11FIP5,ZBTB20,PFKL,EIF2B5,UNC13B,PDK3,PRKAA1	1.5127	0.526964	9	23
RESPONSE TO GLUCOSE%GOBP%GO:0009749	RESPONSE TO GLUCOSE%GOBP%GO:0009749	0.0337682	0.123919	1	IGF1R,PRKAA2,RAB11FIP5,ZBTB20,PFKL,EIF2B5,UNC13B,PDK3,PRKAA1	1.5127	0.526964	9	23
REGULATION OF STRESS FIBER ASSEMBLY%GOBP%GO:0051492	REGULATION OF STRESS FIBER ASSEMBLY%GOBP%GO:0051492	0.0341077	0.125051	1	SYNPO2L,TJP1,SLC9A1,NRP1,PHLDB2,ROCK1,PXN,TGFB3,STMN1,RHOA,SORBS3,PPFIA1,ARAP1,FERMT2,ACTG1,CLASP1,MYOC	1.42895	0.420817	17	50
PID_THROMBIN_PAR1_PATHWAY%MSIGDB_C2%PID_THROMBIN_PAR1_PATHWAY	PID_THROMBIN_PAR1_PATHWAY%MSIGDB_C2%PID_THROMBIN_PAR1_PATHWAY	0.0343438	0.125803	1	GNAO1,GNA14,GNAI1,GNA11,ROCK1,GNAQ,GNA13,VASP,ROCK2,ZYX,GNB1,PKN1,SNX1,PRKCA,PLCB3	1.50952	0.525858	15	23
RAC2 GTPASE CYCLE%REACTOME%R-HSA-9013404.1	RAC2 GTPASE CYCLE%REACTOME%R-HSA-9013404.1	0.0343881	0.125851	1	MCAM,ARHGAP1,STBD1,ABI1,CAV1,TAOK3,CYFIP1,TMPO,ARHGAP35,CDC42EP1,ITGB1,VAMP3,SWAP70,ARMCX3,VAV2,PGRMC2,MPP7,NCKAP1,DOCK1,EMD	1.42725	0.408224	20	58
POSITIVE REGULATION OF DNA METABOLIC PROCESS%GOBP%GO:0051054	POSITIVE REGULATION OF DNA METABOLIC PROCESS%GOBP%GO:0051054	0.0344669	0.126025	-1	SMARCD3,OTUD4,SMARCE1,UBE2N,PTGES3,ACTL6A,RUVBL1,ERCC1,PRKCD,RGCC,SMARCB1,SSBP1,UBE2V2,TIGAR,WDR48,POLG2,DMAP1,NEK7,TP53BP1,CCT2,CCT4,RUVBL2,FAF1,USP7,RPS3,SMARCC1,CCT7,HNRNPAB,PCNA	-1.31985	-0.329468	29	108
REGULATION OF ATP-DEPENDENT ACTIVITY%GOBP%GO:0043462	REGULATION OF ATP-DEPENDENT ACTIVITY%GOBP%GO:0043462	0.0348514	0.127315	-1	PFN2,AHSA1,MYH6,RGN,TNNI3,SSBP1,TNNC1,PAM16,DNAJC24,TPM1	-1.43535	-0.427752	10	41
RNA SPLICING, VIA TRANSESTERIFICATION REACTIONS%GOBP%GO:0000375	RNA SPLICING, VIA TRANSESTERIFICATION REACTIONS%GOBP%GO:0000375	0.035013	0.12779	-1	PPIL1,CD2BP2,NOVA2,SNRPG,RBM6,SNRPB2,MAGOH,DDX39A,PPIH,NCBP2,CDC40,SNRPD3,UBL5,SRSF8,SNRPA1,PPWD1,CELF2,SNRPF,TXNL4A,PPIL3,STRAP,SF3A2,LSM4,TFIP11,CASC3,PRPF40A,LSM2,CTNNBL1,PRPF4B,LSM7,GPKOW,SNRPE,SRSF3,GEMIN6,SRSF10,RALY,SCAF11,AAR2,DHX38,SNRPC,SNRPN,HNRNPH1,ISY1,SNW1,SMU1,SNRPA,TRA2A,CLNS1A,HNRNPF,DCPS,PQBP1,NCBP1,PRPF31	-1.27667	-0.298703	53	172
REGULATION OF INSULIN SECRETION%GOBP%GO:0050796	REGULATION OF INSULIN SECRETION%GOBP%GO:0050796	0.0351113	0.127939	1	ANO1,STX4,MCU,TRPM4,GLUD1,BAD,STX1A,HLA-DRB1	1.50556	0.524478	8	23
AXO-DENDRITIC TRANSPORT%GOBP%GO:0008088	AXO-DENDRITIC TRANSPORT%GOBP%GO:0008088	0.0351174	0.127939	1	FBXW11,DST,SPG11,APP,ARL8A,DYNC1H1,MAP1A,KIF3B,AP3B1,BLOC1S5,AP3D1,NEFL,BLOC1S2,STAU1,KIF3A,KIF5B,RAB27B,ACTR10,AP3S1,TRAK1,BLOC1S1,ARL8B,HSPA8,DCTN1	1.45085	0.444609	24	41
SIGNALING BY TGF-BETA RECEPTOR COMPLEX%REACTOME%R-HSA-170834.2	SIGNALING BY TGF-BETA RECEPTOR COMPLEX%REACTOME%R-HSA-170834.2	0.0353982	0.128846	1	TGFB2,TGFB1,LTBP1,LTBP2,NCOR2,ITGB3,ITGB5,LTBP4,ITGAV,LTBP3,COL1A2,SMAD2,CBL,ITGB1,TGFB3,RHOA	1.42614	0.419989	16	50
MEMBRANE PROTEIN PROTEOLYSIS%GOBP%GO:0033619	MEMBRANE PROTEIN PROTEOLYSIS%GOBP%GO:0033619	0.0357484	0.130003	1	DAG1,TGFB1,ADAM17,PSEN1,MYH9,RBMX,CLPP,ERAP1	1.5421	0.597312	8	15
RNA SPLICING, VIA TRANSESTERIFICATION REACTIONS WITH BULGED ADENOSINE AS NUCLEOPHILE%GOBP%GO:0000377	RNA SPLICING, VIA TRANSESTERIFICATION REACTIONS WITH BULGED ADENOSINE AS NUCLEOPHILE%GOBP%GO:0000377	0.0358829	0.130257	-1	PPIL1,CD2BP2,NOVA2,SNRPG,RBM6,SNRPB2,MAGOH,DDX39A,PPIH,NCBP2,CDC40,SNRPD3,UBL5,SRSF8,SNRPA1,PPWD1,CELF2,SNRPF,TXNL4A,PPIL3,STRAP,SF3A2,LSM4,TFIP11,CASC3,PRPF40A,LSM2,CTNNBL1,PRPF4B,LSM7,GPKOW,SNRPE,SRSF3,GEMIN6,SRSF10,RALY,SCAF11,AAR2,DHX38,SNRPC,SNRPN,HNRNPH1,ISY1,SNW1,SMU1,SNRPA,TRA2A,CLNS1A,HNRNPF,DCPS,PQBP1,NCBP1,PRPF31	-1.28236	-0.300608	53	169
MRNA SPLICING, VIA SPLICEOSOME%GOBP%GO:0000398	MRNA SPLICING, VIA SPLICEOSOME%GOBP%GO:0000398	0.0358829	0.130257	-1	PPIL1,CD2BP2,NOVA2,SNRPG,RBM6,SNRPB2,MAGOH,DDX39A,PPIH,NCBP2,CDC40,SNRPD3,UBL5,SRSF8,SNRPA1,PPWD1,CELF2,SNRPF,TXNL4A,PPIL3,STRAP,SF3A2,LSM4,TFIP11,CASC3,PRPF40A,LSM2,CTNNBL1,PRPF4B,LSM7,GPKOW,SNRPE,SRSF3,GEMIN6,SRSF10,RALY,SCAF11,AAR2,DHX38,SNRPC,SNRPN,HNRNPH1,ISY1,SNW1,SMU1,SNRPA,TRA2A,CLNS1A,HNRNPF,DCPS,PQBP1,NCBP1,PRPF31	-1.28236	-0.300608	53	169
SODIUM ION TRANSPORT%GOBP%GO:0006814	SODIUM ION TRANSPORT%GOBP%GO:0006814	0.0359907	0.130432	1	PKD2,TRPM4,SLC9A1,SLC4A4,SCN7A,ANO6,ATP1B3,ATP1A3	1.52104	0.555483	8	19
MICROTUBULE-BASED MOVEMENT%GOBP%GO:0007018	MICROTUBULE-BASED MOVEMENT%GOBP%GO:0007018	0.0359957	0.130432	1	FBXW11,BICD1,SLC9A3R1,KIF13A,ATP2B4,DST,MAP4,NDE1,KLC4,KIFAP3,SPG11,APP,ARL8A,DYNC1H1,DYNLT3,MAP1A,KIF3B,KPNB1,RAB6A,AP3B1,IFT57,BLOC1S5,AP3D1,HTT,RAB1A,PEX14,KIF13B,NEFL,BLOC1S2,STAU1,BAG3,TMEM201,KIF3A,KIF2A	1.36337	0.358751	34	94
REGULATION OF RAS PROTEIN SIGNAL TRANSDUCTION%GOBP%GO:0046578	REGULATION OF RAS PROTEIN SIGNAL TRANSDUCTION%GOBP%GO:0046578	0.0361116	0.130734	1	SYNPO2L,HEG1,TGFB2,NOTCH2,COL3A1,NRP1,MAPRE2,AKAP13,ARHGAP35,MAP4K4,STMN1,CUL3,MYO9B,RALBP1,KCTD10,APOE,DAB2IP,ARRB1,DENND4A,KANK2,RAF1,ARHGEF2,MYOC,MAPKAP1	1.39589	0.386373	24	70
NUCLEAR MEMBRANE REASSEMBLY%GOBP%GO:0031468	NUCLEAR MEMBRANE REASSEMBLY%GOBP%GO:0031468	0.0362019	0.130944	-1	CHMP2B,CHMP2A,UBXN2B,SIRT2,VPS4A,CHMP7	-1.53165	-0.549124	6	19
HEART MORPHOGENESIS%GOBP%GO:0003007	HEART MORPHOGENESIS%GOBP%GO:0003007	0.0363134	0.131229	1	SYNPO2L,TGFB2,EPHB4,TGFB1,PKD2,NOTCH2,ELN,NRP1,ANKRD1,SEMA3C,MICAL2,INSR,S1PR1	1.42493	0.418023	13	51
REGULATION OF MAPK CASCADE%GOBP%GO:0043408	REGULATION OF MAPK CASCADE%GOBP%GO:0043408	0.0364358	0.131554	1	MID1,IGF1R,DAG1,TGFB2,ROR1,TGFB1,RRAS,NOTCH2,SLC9A3R1,TPD52L1,GLIPR2,EMILIN1,CAV1,IGF2,CAV2,TAOK3,NRP1,PDGFRB,CD74,INSR,TAOK1,MAP4K4,HLA-DRB1,AMBP,ROCK1,CD44,RELL1,STK25,PTPN11,NPNT,APP,PTPN2,APOE,DAB2IP,GPNMB,FERMT2,FZD7,GBP1,DLG1,TRAF5,ARRB1,PRKD2,EGFR,NPPA,FGF1,CD81,RAF1,TAOK2,UCHL1,MYOC,FLT1,XIAP,HDAC3,FGG,PLCG2,IQGAP1,IGFBP6,MAPK1,NF1,FGB,MAP3K5	1.28606	0.309614	61	180
ESTABLISHMENT OF PROTEIN LOCALIZATION TO MEMBRANE%GOBP%GO:0090150	ESTABLISHMENT OF PROTEIN LOCALIZATION TO MEMBRANE%GOBP%GO:0090150	0.0365962	0.132015	1	RFTN1,RAB31,TRAM1,SRPRB,KIF13A,RAB34,OXA1L,SPTBN1,SEC62,RAB8B,RILPL1,EMC1,GOLGA4,STX3,TIMM22,MYO1C,GOLGA7,EMC4,RAB10,SCRIB,NSF,HSPA4,EMC3,BAG6,RAB8A,SEC63,EGFR,PEX16,TAOK2,TOMM40	1.33799	0.341452	30	117
COLLAGEN DEGRADATION%REACTOME DATABASE ID RELEASE 81%1442490	COLLAGEN DEGRADATION%REACTOME DATABASE ID RELEASE 81%1442490	0.0367043	0.132188	1	COL12A1,COL16A1,COL18A1,ADAM17,COL14A1	1.53512	0.594608	5	15
CELLULAR POLYSACCHARIDE METABOLIC PROCESS%GOBP%GO:0044264	CELLULAR POLYSACCHARIDE METABOLIC PROCESS%GOBP%GO:0044264	0.0367363	0.132188	1	STBD1,EXT2,GYS1,PYGB,RB1CC1,AGL	1.52423	0.56421	6	18
PROTEIN LOCALIZATION TO EXTRACELLULAR REGION%GOBP%GO:0071692	PROTEIN LOCALIZATION TO EXTRACELLULAR REGION%GOBP%GO:0071692	0.0367424	0.132188	1	LTBP1,LTBP2,CAMK2G,CANX,RAB8B,DMTN,RAB11FIP5,FBN2,RAB10,RCN3,RAB8A,PREB,SEL1L,FBN1,FGG	1.44605	0.45425	15	37
REGULATION OF G1/S TRANSITION OF MITOTIC CELL CYCLE%GOBP%GO:2000045	REGULATION OF G1/S TRANSITION OF MITOTIC CELL CYCLE%GOBP%GO:2000045	0.0372165	0.133774	-1	PSME2,TRIAP1,SMARCD3,RDX,PSME1,SMARCE1,CDK2,PTPN6,ACTL6A,PPP2CA,RGCC,ANKRD17,SMARCB1	-1.37766	-0.373039	13	65
GLYCOSPHINGOLIPID METABOLIC PROCESS%GOBP%GO:0006687	GLYCOSPHINGOLIPID METABOLIC PROCESS%GOBP%GO:0006687	0.0372671	0.133836	-1	CPTP,GBA,ST3GAL1,GM2A,NEU1,HEXB,GLTP,GLA,SMPD1,A4GALT	-1.52938	-0.55661	10	18
REGULATION OF CYTOKINE-MEDIATED SIGNALING PATHWAY%GOBP%GO:0001959	REGULATION OF CYTOKINE-MEDIATED SIGNALING PATHWAY%GOBP%GO:0001959	0.0374468	0.134362	-1	SAMHD1,OTUD4,GSTP1,UBE2K,PTPN6,CDC37,SHARPIN,PPP2CB,OTULIN,HSPA1B,PTPN1,ADIPOQ,VRK2	-1.42897	-0.423341	13	42
ESTABLISHMENT OR MAINTENANCE OF EPITHELIAL CELL APICAL/BASAL POLARITY%GOBP%GO:0045197	ESTABLISHMENT OR MAINTENANCE OF EPITHELIAL CELL APICAL/BASAL POLARITY%GOBP%GO:0045197	0.037703	0.135161	1	ANK1,SLC9A3R1,DLG3,LLGL1,SCRIB,RHOA,DLG1	1.51969	0.562529	7	18
REGULATION OF SIGNALING RECEPTOR ACTIVITY%GOBP%GO:0010469	REGULATION OF SIGNALING RECEPTOR ACTIVITY%GOBP%GO:0010469	0.0379264	0.135841	1	BICD1,HBEGF,ADAM17,DLGAP4,NRP1,RELN,CBL,ITGB1,BUD31,AKAP9,APP,HDAC2,ACE2,NCK2	1.47622	0.483713	14	30
REGULATION OF SYNAPSE ORGANIZATION%GOBP%GO:0050807	REGULATION OF SYNAPSE ORGANIZATION%GOBP%GO:0050807	0.0380988	0.136338	1	FYN,AGRN,DBNL,SRPX2,SNCA,HOMER1,DBN1,CAMK2B,MYCBP2,RELN,APP,RHOA,APOE,DAB2IP	1.43153	0.437136	14	42
INTEGRIN FAMILY CELL SURFACE INTERACTIONS%PATHWAY INTERACTION DATABASE NCI-NATURE CURATED DATA%INTEGRIN FAMILY CELL SURFACE INTERACTIONS	INTEGRIN FAMILY CELL SURFACE INTERACTIONS%PATHWAY INTERACTION DATABASE NCI-NATURE CURATED DATA%INTEGRIN FAMILY CELL SURFACE INTERACTIONS	0.0384248	0.137382	1	ITGB4,ITGA1,ITGB3,ITGB5,ITGAV,ITGA9,ITGB1,ITGA7,ITGA11,ITGA6	1.52928	0.592344	10	15
PROTEIN AUTOPHOSPHORYLATION%GOBP%GO:0046777	PROTEIN AUTOPHOSPHORYLATION%GOBP%GO:0046777	0.0386164	0.137945	1	IGF1R,EPHB4,TAOK3,MTOR,PDGFRB,CAMK2B,INSR,TAOK1,CAMK2A,RB1CC1,DAPK3,STK25,AAK1,PEAK1,LMTK2,PRKD2,EGFR,DDR1,STK16,PTK2,TAOK2,SIK2,SLK,CAMK2D,FLT1,MKNK1,FER	1.38579	0.387037	27	67
REGULATION OF KINASE ACTIVITY%GOBP%GO:0043549	REGULATION OF KINASE ACTIVITY%GOBP%GO:0043549	0.0387821	0.138414	1	IGF1R,HEG1,TGFB2,EPHB4,ROR1,TGFB1,RAP2B,PKD2,PIK3IP1,SLC9A3R1,ITGB3,TPD52L1,CAV1,HBEGF,ATP2B4,EPHA3,PRKAG1,PIBF1,DLG3,ADAM17,SNCA,TAOK3,MTOR,PDGFRB,SMCR8,THY1,BAD,RPTOR,CACUL1,CD74,CORO1C,INSR,ACE,RELN,CBL,HLA-DRB1,GNAQ,HGS,TLR3,CCND2,APP,RHOA,APOE,DAB2IP,RALB,ACTB,FERMT2,PIK3R4,LMTK2,EGFR,NPPA,FGF1,CD81,DDR1,NCK2,PTK2,TAOK2,UCHL1,TTN,FLT1,RBL2,SRCIN1,EEF1A1,IQGAP1,CLU,HTT,NF1,GPRC5B,MAP3K5,WDR91	1.26418	0.297848	70	219
ENDOTHELINS%PATHWAY INTERACTION DATABASE NCI-NATURE CURATED DATA%ENDOTHELINS	ENDOTHELINS%PATHWAY INTERACTION DATABASE NCI-NATURE CURATED DATA%ENDOTHELINS	0.0390699	0.139318	1	GNAO1,GNA14,SLC9A1,GNAI1,COL3A1,GNAI2,ADCY9,GNA11,COL1A2,GNAQ,RHOA	1.47103	0.482012	11	30
INTEGRIN-MEDIATED CELL ADHESION%WIKIPATHWAYS_20220510%WP185%HOMO SAPIENS	INTEGRIN-MEDIATED CELL ADHESION%WIKIPATHWAYS_20220510%WP185%HOMO SAPIENS	0.0392811	0.139948	1	CAPN5,ITGB4,FYN,ITGA1,ITGB3,ITGB5,CAV2,ITGAV,TLN1,ROCK1,PXN,ITGB1,ITGA7,RAPGEF1,VAV2,ITGA6,MYPN,RAF1,DOCK1,VASP,MAPK1,GRB2	1.43175	0.42867	22	46
POST-TRANSLATIONAL PROTEIN PHOSPHORYLATION%REACTOME%R-HSA-8957275.1	POST-TRANSLATIONAL PROTEIN PHOSPHORYLATION%REACTOME%R-HSA-8957275.1	0.0395967	0.140947	1	SDC2,IGFBP5,MFGE8,LAMB2,IGFBP7,IGFBP3,LTBP1,VCAN,VWA1,SERPIND1,SPP2,APP,APOE,STC2,APLP2,HRC,LAMC1,FBN1,PRKCSH,APOB,FGG	1.39365	0.393587	21	63
MRNA METABOLIC PROCESS%GOBP%GO:0016071	MRNA METABOLIC PROCESS%GOBP%GO:0016071	0.0396318	0.140948	-1	PPIL1,CD2BP2,AKAP8L,POLR2G,TRMT6,ZFP36L1,NOVA2,SNRPG,PAPOLA,RBM6,NUDT16L1,SNRPB2,MAGOH,DDX39A,PPIH,NCBP2,CDC40,SNRPD3,NT5C3B,UBL5,EDC3,SRSF8,SNRPA1,TRMT61B,HSPA1B,EXOSC3,PPWD1,CELF2,SNRPF,TXNL4A,GSPT1,NUDT21,PPIL3,STRAP,SF3A2,LSM4,XRN2,TFIP11,SSB,NUDT16,CASC3,PRPF40A,LSM2,MRTO4,CPSF6,CTNNBL1,DIS3L2,PRPF4B,LSM7,SAMD4A,RPRD1B,GPKOW,PDE12,SNRPE,HNRNPAB,FIP1L1,EXOSC9,SRSF3,GEMIN6,SRSF10,RALY,EXOSC7,S…	-1.21019	-0.267873	88	290
REGULATION OF AMYLOID PRECURSOR PROTEIN CATABOLIC PROCESS%GOBP%GO:1902991	REGULATION OF AMYLOID PRECURSOR PROTEIN CATABOLIC PROCESS%GOBP%GO:1902991	0.0397389	0.141204	1	RTN4,RTN1,FLOT2,ROCK1,RTN3,APOE,PICALM,BIN1,CLU,RELA,LYN,ROCK2	1.50228	0.534026	12	21
FGF SIGNALING PATHWAY%PANTHER PATHWAY%P00021	FGF SIGNALING PATHWAY%PANTHER PATHWAY%P00021	0.0399746	0.141882	-1	MAP2K1,ARAF,MAP2K2,PTPN6,PRKCD,MAPK14,PEBP1,MAP2K4,NRAS,MAPK13	-1.43403	-0.439971	10	36
CARDIAC CONDUCTION%REACTOME DATABASE ID RELEASE 81%5576891	CARDIAC CONDUCTION%REACTOME DATABASE ID RELEASE 81%5576891	0.04	0.141882	1	ATP2A3,FXYD1,CAMK2G,ITPR1,ATP2B4,TRDN,CAMK2B,PLN,SCN7A,CAMK2A,ATP2B1,CACNA2D2,ATP1B3,AKAP9,MME,ASPH,ORAI1,ATP1A3,STIM1,ITPR3,NPPA	1.41115	0.413979	21	51
ADORA2B MEDIATED ANTI-INFLAMMATORY CYTOKINES PRODUCTION%REACTOME%R-HSA-9660821.1	ADORA2B MEDIATED ANTI-INFLAMMATORY CYTOKINES PRODUCTION%REACTOME%R-HSA-9660821.1	0.0402607	0.142682	1	GNAI1,GNAI2,ADCY9,CALCRL,GNAS	1.48315	0.507664	5	25
IL-5 SIGNALING PATHWAY%WIKIPATHWAYS_20220510%WP127%HOMO SAPIENS	IL-5 SIGNALING PATHWAY%WIKIPATHWAYS_20220510%WP127%HOMO SAPIENS	0.0405881	0.143715	-1	RPS6KA1,STAT3,MAP2K1,MAP2K2,RPS6KB1,GSK3A	-1.49826	-0.518679	6	22
LIPID MODIFICATION%GOBP%GO:0030258	LIPID MODIFICATION%GOBP%GO:0030258	0.0407711	0.144131	-1	HADHA,DECR1,HADHB,CPT2,ACAT1,ADH5,HSD17B4,GBA,ACADVL,ECHS1,ACAA2,GCDH,ECI2,PTEN,DGKA,ACOT8,ADIPOQ,SCP2,ACAT2,HADH,AUH,INPP5J,MTMR9,CRAT	-1.3506	-0.359702	24	72
FORMATION OF TC-NER PRE-INCISION COMPLEX%REACTOME%R-HSA-6781823.1	FORMATION OF TC-NER PRE-INCISION COMPLEX%REACTOME%R-HSA-6781823.1	0.0408293	0.144131	-1	COPS2,POLR2G,COPS8,COPS5,COPS4,POLR2H,COPS6,CUL4B,COPS3,USP7,GPS1,POLR2J,RBX1,EP300,ISY1,COPS7A	-1.44282	-0.451759	16	33
REGULATION OF TRANSFORMING GROWTH FACTOR BETA RECEPTOR SIGNALING PATHWAY%GOBP%GO:0017015	REGULATION OF TRANSFORMING GROWTH FACTOR BETA RECEPTOR SIGNALING PATHWAY%GOBP%GO:0017015	0.040877	0.144131	1	TGFB1,LTBP1,EMILIN1,CAV1,ADAM17,ASPN,LTBP4,PBLD,FAM89B,SMAD2,FBN2,CREBBP	1.42137	0.424541	12	47
REGULATION OF CELLULAR RESPONSE TO TRANSFORMING GROWTH FACTOR BETA STIMULUS%GOBP%GO:1903844	REGULATION OF CELLULAR RESPONSE TO TRANSFORMING GROWTH FACTOR BETA STIMULUS%GOBP%GO:1903844	0.040877	0.144131	1	TGFB1,LTBP1,EMILIN1,CAV1,ADAM17,ASPN,LTBP4,PBLD,FAM89B,SMAD2,FBN2,CREBBP	1.42137	0.424541	12	47
LEARNING%GOBP%GO:0007612	LEARNING%GOBP%GO:0007612	0.0408986	0.144131	1	FYN,PTN,INSR,CIC,APP,MAP1A,HTT,NF1	1.51481	0.578158	8	16
REGULATION OF PROTEIN UBIQUITINATION%GOBP%GO:0031396	REGULATION OF PROTEIN UBIQUITINATION%GOBP%GO:0031396	0.0409396	0.144131	-1	RCHY1,DERL1,UBE2V1,NXN,UBE2N,PRMT3,DNAJA1,PARK7,HSPBP1,RPS7,UBE2V2,TSPYL5,BCL10,GSK3A,HSPA1B,PTEN,OTUB1,OGT,RPS3,SQSTM1,RPL23,UBXN1,TBC1D7,SH3RF2,GTPBP4,DDX3X,RBX1,DTX3L,DCUN1D1	-1.3343	-0.345029	29	85
REGULATION OF ADAPTIVE IMMUNE RESPONSE BASED ON SOMATIC RECOMBINATION OF IMMUNE RECEPTORS BUILT FROM IMMUNOGLOBULIN SUPERFAMILY DOMAINS%GOBP%GO:0002822	REGULATION OF ADAPTIVE IMMUNE RESPONSE BASED ON SOMATIC RECOMBINATION OF IMMUNE RECEPTORS BUILT FROM IMMUNOGLOBULIN SUPERFAMILY DOMAINS%GOBP%GO:0002822	0.0409556	0.144131	1	CD55,CD46,TGFB1,TRPM4,HLA-DRB1,FBXO38,LOXL3,STX7,TYK2,CD81	1.43617	0.453686	10	36
OLEFINIC COMPOUND METABOLIC PROCESS%GOBP%GO:0120254	OLEFINIC COMPOUND METABOLIC PROCESS%GOBP%GO:0120254	0.0410843	0.144458	-1	RETSAT,GSTP1,PTGES3,BCO2,GSTM2,ADH1B,PLA2G4C,ACOT8,RBP4,SCP2,ELOVL1,ABHD6,AKR1C1,AKR1C3,GPX4	-1.42597	-0.433974	15	37
CELL CYCLE%REACTOME DATABASE ID RELEASE 81%1640170	CELL CYCLE%REACTOME DATABASE ID RELEASE 81%1640170	0.0411554	0.144582	-1	CLASP2,PSME2,IST1,PSMA4,CDK6,NUP43,POLR2G,PSME1,UBE2N,PSMD14,ARPP19,PSMB6,CHMP2B,PPP1CC,PPME1,MCM4,CHMP2A,PSMA1,CDK2,PSMB3,PSMA7,PSMB4,RUVBL1,PPP2CA,PSMC2,PSMB7,PSMA6,PPP2CB,SIRT2,VPS4A,PSMB2,PSMA2,UBE2V2,PSMD7,POLR2H,PPP6C,CHMP7,TUBB2B,NEK7,GORASP2,PSMB8,TP53BP1,PSMA3,PCM1,RUVBL2,PSMD5,PPP2R2D,NUP155,SMC2,PAFAH1B1,FBXL18,PSMC1,DYRK1A,NUDC,PPP2R5D,LCMT1,NME7,ORC4,POLR2J,RPS27,PPP2R5C,ODF2,PCNA,YW…	-1.2076	-0.267351	104	289
REGULATION OF PEPTIDE TRANSPORT%GOBP%GO:0090087	REGULATION OF PEPTIDE TRANSPORT%GOBP%GO:0090087	0.0413476	0.144872	1	ANO1,STX4,MCU,TRPM4,GLUD1,BAD,CD74,STX1A,HLA-DRB1	1.46176	0.483513	9	29
EXTRINSIC APOPTOTIC SIGNALING PATHWAY%GOBP%GO:0097191	EXTRINSIC APOPTOTIC SIGNALING PATHWAY%GOBP%GO:0097191	0.0414291	0.144872	1	TGFB2,TNFSF12,TGFB1,ITGAV,BAD,BCL2L2,SORT1,TLR3,DAB2IP	1.46691	0.488027	9	28
PHOSPHOINOSITIDES METABOLISM%WIKIPATHWAYS_20220510%WP4971%HOMO SAPIENS	PHOSPHOINOSITIDES METABOLISM%WIKIPATHWAYS_20220510%WP4971%HOMO SAPIENS	0.041437	0.144872	1	PLCB4,SACM1L,PIK3C2B,INPP5D,PIP5K1C,PLCD3,PIK3R4,PLCG2,MTMR12,SBF1,MTMR2,MTM1	1.48453	0.497386	12	27
EPIBOLY%GOBP%GO:0090504	EPIBOLY%GOBP%GO:0090504	0.0414747	0.144872	1	FLNA,ADAM17,COL5A1,ARHGAP35,CD44,TOR1A,ITGB1,RHOA,DDR1	1.51377	0.57776	9	16
WOUND HEALING, SPREADING OF CELLS%GOBP%GO:0044319	WOUND HEALING, SPREADING OF CELLS%GOBP%GO:0044319	0.0414747	0.144872	1	FLNA,ADAM17,COL5A1,ARHGAP35,CD44,TOR1A,ITGB1,RHOA,DDR1	1.51377	0.57776	9	16
EPIBOLY INVOLVED IN WOUND HEALING%GOBP%GO:0090505	EPIBOLY INVOLVED IN WOUND HEALING%GOBP%GO:0090505	0.0414747	0.144872	1	FLNA,ADAM17,COL5A1,ARHGAP35,CD44,TOR1A,ITGB1,RHOA,DDR1	1.51377	0.57776	9	16
REGULATION OF MEMBRANE POTENTIAL%GOBP%GO:0042391	REGULATION OF MEMBRANE POTENTIAL%GOBP%GO:0042391	0.0414894	0.144872	1	DMD,GNA14,CACNA2D1,FXYD1,CAV1,TRPM4,FLNA,SLC25A36,TRDN,SLC9A1,SLMAP,DCN,BAD,PLN,GNA11,SLC4A4,PIEZO1,RELN,GJA1,SCN7A,EHD3,FMR1,GNAQ,ATP1B3,AKAP9,APP,UNC13B,ATP1A3,DLG1,NPPA,FHL1,YWHAH,MYOC,CAMK2D,BIN1	1.33879	0.345359	35	107
PID_SYNDECAN_2_PATHWAY%MSIGDB_C2%PID_SYNDECAN_2_PATHWAY	PID_SYNDECAN_2_PATHWAY%MSIGDB_C2%PID_SYNDECAN_2_PATHWAY	0.0415465	0.144945	1	SDC2,CASK,TGFB1,CAV2,LAMA3,ITGB1	1.50793	0.566681	6	17
SENSORY ORGAN DEVELOPMENT%GOBP%GO:0007423	SENSORY ORGAN DEVELOPMENT%GOBP%GO:0007423	0.0415827	0.144946	1	MFAP5,TGFB2,ROR1,COL4A1,ECE1,MFAP2,NRP1,PDGFRB,COL5A1,THY1,PHOX2B,NES,FBN2,PROM1,WNT9B,PTPN11,PTPRM,EFEMP1,HDAC2,FLT1,FBN1,COL5A2,MYO6,NF1,NIPBL	1.38623	0.390391	25	64
FOCAL ADHESION ASSEMBLY%GOBP%GO:0048041	FOCAL ADHESION ASSEMBLY%GOBP%GO:0048041	0.0416667	0.145035	1	ACTN1,CTTN,CDH11,THY1,SORBS1,FERMT2,PEAK1,TAOK2	1.51352	0.577668	8	16
NEGATIVE REGULATION OF SIGNAL TRANSDUCTION%GOBP%GO:0009968	NEGATIVE REGULATION OF SIGNAL TRANSDUCTION%GOBP%GO:0009968	0.0416801	0.145035	1	IGF1R,HEG1,C1QTNF3,DAG1,IGFBP5,EGFL7,TGFB2,DACT3,BICD1,MUL1,CD46,IGFBP3,LTBP1,UACA,PIK3IP1,SLC9A3R1,CILP,ITGA1,CRIM1,NCOR2,EMILIN1,CAV1,ITPR1,ATP2B4,PF4,PIBF1,SLC25A6,ADAM17,ASPN,SNCA,TAOK3,DCN,PRKAA2,PBLD,FAM89B,ITGAV,THY1,ENPP1,MYADM,CSNK2A2,BCL2L2,GHITM,CD74,ARHGAP35,HOMER2,CBL,AMBP,CD44,PDCD6,AJUBA,HRG,STMN1,CUL3,FBN2,CSNK1A1,HGS,HOMER3,INPP5D,LEMD2,KCTD10,TPBG,SLC35F6,PTPN2,APOE,DAB2IP,ITGA6…	1.21169	0.27035	115	385
ENDODERM DEVELOPMENT%GOBP%GO:0007492	ENDODERM DEVELOPMENT%GOBP%GO:0007492	0.0419486	0.145844	1	COL12A1,COL4A2,COL6A1,ITGB5,COL8A1,ITGAV,LAMA3,ITGA7,CDC73	1.4911	0.52612	9	22
REGULATION OF CHOLESTEROL BIOSYNTHESIS BY SREBP (SREBF)%REACTOME%R-HSA-1655829.2	REGULATION OF CHOLESTEROL BIOSYNTHESIS BY SREBP (SREBF)%REACTOME%R-HSA-1655829.2	0.042061	0.146089	-1	PMVK,FASN,SMARCD3,ACACB,MVD,GGPS1,MVK,FDPS,IDI1	-1.46064	-0.467854	9	30
REGULATION OF RESPONSE TO CYTOKINE STIMULUS%GOBP%GO:0060759	REGULATION OF RESPONSE TO CYTOKINE STIMULUS%GOBP%GO:0060759	0.0420916	0.146089	-1	SAMHD1,OTUD4,GSTP1,UBE2K,PTPN6,CDC37,SHARPIN,PPP2CB,OTULIN,HSPA1B,PTPN1,ADIPOQ,VRK2	-1.39953	-0.409414	13	45
GPER1 SIGNALING%REACTOME DATABASE ID RELEASE 81%9634597	GPER1 SIGNALING%REACTOME DATABASE ID RELEASE 81%9634597	0.0423696	0.146611	1	GNAI1,GNAI2,ADCY9,GNAS,ITGB1	1.47753	0.50574	5	25
CELLULAR AMINO ACID CATABOLIC PROCESS%GOBP%GO:0009063	CELLULAR AMINO ACID CATABOLIC PROCESS%GOBP%GO:0009063	0.0423766	0.146611	-1	GLUD2,ALDH6A1,SHMT1,ACAT1,GLUL,BCKDHB,MCCC2,GOT1,ECHS1,GCSH,HIBADH,QDPR,BCKDHA,ALDH5A1,AASS	-1.38997	-0.397965	15	50
AMYLOID FIBER FORMATION%REACTOME DATABASE ID RELEASE 81%977225	AMYLOID FIBER FORMATION%REACTOME DATABASE ID RELEASE 81%977225	0.0423874	0.146611	1	MFGE8,TGFBI,HSPG2,SNCA,APOA4,GSN,APP,APOE,APCS,ITM2B,USP9X,NPPA	1.48326	0.496961	12	27
STIMULI-SENSING CHANNELS%REACTOME%R-HSA-2672351.4	STIMULI-SENSING CHANNELS%REACTOME%R-HSA-2672351.4	0.0423874	0.146611	1	ANO1,TRPV2,TPCN1,TRPM4,TRDN,ANO6,TSC22D3,ASPH,CLCN6,RAF1,ANO10,WWP1,WNK2,RYR2	1.48325	0.496956	14	27
CELLULAR RESPONSE TO ACID CHEMICAL%GOBP%GO:0071229	CELLULAR RESPONSE TO ACID CHEMICAL%GOBP%GO:0071229	0.0424429	0.146677	1	FYN,PKD2,MTOR,RPTOR	1.49861	0.539381	4	20
DE NOVO PURINE BIOSYNTHESIS%PANTHER PATHWAY%P02738	DE NOVO PURINE BIOSYNTHESIS%PANTHER PATHWAY%P02738	0.0425532	0.146932	-1	ADSL,AK1,GMPS,RRM2B,IMPDH2,GART,NME7,NME1,NME2,AK4,NME3,AK3	-1.50827	-0.567403	12	16
IMMUNOREGULATORY INTERACTIONS BETWEEN A LYMPHOID AND A NON-LYMPHOID CELL%REACTOME DATABASE ID RELEASE 81%198933	IMMUNOREGULATORY INTERACTIONS BETWEEN A LYMPHOID AND A NON-LYMPHOID CELL%REACTOME DATABASE ID RELEASE 81%198933	0.042827	0.147751	-1	FCGR3A,SIGLEC1,LILRB5,ITGB2	-1.45468	-0.4744	4	28
ACYL-COA METABOLIC PROCESS%GOBP%GO:0006637	ACYL-COA METABOLIC PROCESS%GOBP%GO:0006637	0.0429072	0.147775	-1	PMVK,ACACB,MVD,ACAT1,MVK,ACSF2,HMGCS2,ACSS2,HSD17B4,ACOT2,GCDH,PPT1,ACOT8,ELOVL1,SUCLG2	-1.38767	-0.393766	15	52
THIOESTER METABOLIC PROCESS%GOBP%GO:0035383	THIOESTER METABOLIC PROCESS%GOBP%GO:0035383	0.0429072	0.147775	-1	PMVK,ACACB,MVD,ACAT1,MVK,ACSF2,HMGCS2,ACSS2,HSD17B4,ACOT2,GCDH,PPT1,ACOT8,ELOVL1,SUCLG2	-1.38767	-0.393766	15	52
REGULATION OF HYDROLASE ACTIVITY%GOBP%GO:0051336	REGULATION OF HYDROLASE ACTIVITY%GOBP%GO:0051336	0.0432441	0.148808	1	TGM2,ATP2A3,TGFB2,BICD1,MUL1,FYN,PLXNA1,RABGAP1,APOC1,AGRN,UACA,RECK,ITGA1,CAV1,EPHA3,AGAP3,TIMP2,DOCK6,SNCA,CAV2,RABGAP1L,DOCK7,MTOR,SERPIND1,PDGFRB,HIP1,SMCR8,THY1,MAPRE2,BAD,APOA4,SERPINE2,TBC1D9B,CORO1C,ECM1,SERPINA5,SERPINA4,MAP4K4,RALGAPB,ROCK1,CD44,CAMK2A,PDCD6,SORT1,MBP,GSN,HRG,PLXNB2,SNX18,TBC1D1,ITGB1,BCAP31,STMN1,GNAQ,RALBP1,LIMS1,SCRIB,RHOA,PLXNA2,ASPH,DAB2IP,COL4A3,RAPGEF1,RCN3,VAV2,…	1.21972	0.275186	92	336
CHOLESTEROL BIOSYNTHESIS%REACTOME DATABASE ID RELEASE 81%191273	CHOLESTEROL BIOSYNTHESIS%REACTOME DATABASE ID RELEASE 81%191273	0.0433871	0.149173	-1	PMVK,MVD,GGPS1,MVK,FDPS,IDI1	-1.50894	-0.578372	6	15
GLYCOLYSIS AND GLUCONEOGENESIS%WIKIPATHWAYS_20220510%WP534%HOMO SAPIENS	GLYCOLYSIS AND GLUCONEOGENESIS%WIKIPATHWAYS_20220510%WP534%HOMO SAPIENS	0.0434423	0.149236	-1	ENO3,HK3,ALDOC,PFKM,PGAM2,MDH2	-1.49963	-0.537645	6	19
TRANSPORT OF MATURE TRANSCRIPT TO CYTOPLASM%REACTOME DATABASE ID RELEASE 81%72202	TRANSPORT OF MATURE TRANSCRIPT TO CYTOPLASM%REACTOME DATABASE ID RELEASE 81%72202	0.0435835	0.149594	-1	EIF4E,POLDIP3,NUP43,MAGOH,DDX39A,NCBP2,CDC40,NUP155,CASC3,SRSF11,THOC3,FIP1L1,SRSF3,NUP50,NXF1,DHX38,WDR33,THOC6,NUP160,NCBP1,SYMPK,NUP37,NUP35,SRSF6,SRSF5,NUP153,NUP85,CPSF1,SARNP,SRSF7,EIF4A3,DDX39B,NUP133,SRSF2,SRSF1	-1.36131	-0.370006	35	64
REGULATION OF ADAPTIVE IMMUNE RESPONSE%GOBP%GO:0002819	REGULATION OF ADAPTIVE IMMUNE RESPONSE%GOBP%GO:0002819	0.04375	0.149948	1	CD55,CD46,TGFB1,TRPM4,HLA-DRB1,FBXO38,LOXL3,STX7,TYK2,CD81	1.42195	0.446678	10	37
CDC42 GTPASE CYCLE%REACTOME DATABASE ID RELEASE 81%9013148	CDC42 GTPASE CYCLE%REACTOME DATABASE ID RELEASE 81%9013148	0.0437613	0.149948	1	FARP1,ARHGAP1,PLEKHG3,WIPF3,FMNL3,CAV1,DAAM1,DOCK6,ARHGEF12,DOCK7,TMPO,CDC42BPB,SNAP23,ARHGAP35,CDC42EP1,CDC42BPA,VAMP3,MYO9B,RALBP1,SCRIB,VAV2,ARAP1,GNA13,PREX2,WIPF2,ARHGEF11,WASL,IQGAP1,CDC42EP3,WDR91	1.35537	0.361711	30	86
POSITIVE REGULATION OF DOUBLE-STRAND BREAK REPAIR%GOBP%GO:2000781	POSITIVE REGULATION OF DOUBLE-STRAND BREAK REPAIR%GOBP%GO:2000781	0.0438374	0.150082	-1	SMARCD3,SMARCE1,UBE2N,ACTL6A,RUVBL1,SMARCB1,UBE2V2,WDR48,DMAP1,RUVBL2	-1.41446	-0.430472	10	37
REGULATION OF PEPTIDE SECRETION%GOBP%GO:0002791	REGULATION OF PEPTIDE SECRETION%GOBP%GO:0002791	0.0438997	0.150167	1	ANO1,STX4,MCU,TRPM4,GLUD1,BAD,CD74,STX1A,HLA-DRB1	1.45953	0.485571	9	28
NEGATIVE REGULATION OF TRANSFORMING GROWTH FACTOR BETA RECEPTOR SIGNALING PATHWAY%GOBP%GO:0030512	NEGATIVE REGULATION OF TRANSFORMING GROWTH FACTOR BETA RECEPTOR SIGNALING PATHWAY%GOBP%GO:0030512	0.0440252	0.150286	1	LTBP1,EMILIN1,CAV1,ADAM17,ASPN,PBLD,FAM89B,FBN2,HDAC2,FBN1,TGFB1I1,LEMD3,PPM1A	1.44882	0.474734	13	30
REGULATION OF REACTIVE OXYGEN SPECIES METABOLIC PROCESS%GOBP%GO:2000377	REGULATION OF REACTIVE OXYGEN SPECIES METABOLIC PROCESS%GOBP%GO:2000377	0.0440265	0.150286	-1	ITGB2,ITGAM,GSTP1,CRP,PLIN5,BCO2,HP,PRKCD,PARK7,SIRT2,DCXR,AGT,MAPK14	-1.4036	-0.413709	13	43
CELLULAR RESPONSE TO BMP STIMULUS%GOBP%GO:0071773	CELLULAR RESPONSE TO BMP STIMULUS%GOBP%GO:0071773	0.0440835	0.150286	1	TGFB2,TGFB1,PHOX2B,SMAD2,TGFB3,USP9X,CHRD	1.49698	0.554121	7	18
RESPONSE TO BMP%GOBP%GO:0071772	RESPONSE TO BMP%GOBP%GO:0071772	0.0440835	0.150286	1	TGFB2,TGFB1,PHOX2B,SMAD2,TGFB3,USP9X,CHRD	1.49698	0.554121	7	18
THROMBIN SIGNALLING THROUGH PROTEINASE ACTIVATED RECEPTORS (PARS)%REACTOME%R-HSA-456926.2	THROMBIN SIGNALLING THROUGH PROTEINASE ACTIVATED RECEPTORS (PARS)%REACTOME%R-HSA-456926.2	0.0443111	0.150807	1	GNA14,GNA11,GNAQ,ARRB1,GNA13,MAPK1,GNB1,GNG5	1.48416	0.542013	8	19
NCRNAS INVOLVED IN WNT SIGNALING IN HEPATOCELLULAR CARCINOMA%WIKIPATHWAYS_20220510%WP4336%HOMO SAPIENS	NCRNAS INVOLVED IN WNT SIGNALING IN HEPATOCELLULAR CARCINOMA%WIKIPATHWAYS_20220510%WP4336%HOMO SAPIENS	0.0443111	0.150807	1	ROR1,CSNK2A2,CSNK1A1,CCND2,FZD7,CSNK2A1,CSNK1E,APC,CTNNB1,ROR2	1.4827	0.541482	10	19
REGULATION OF PROTEIN TYROSINE KINASE ACTIVITY%GOBP%GO:0061097	REGULATION OF PROTEIN TYROSINE KINASE ACTIVITY%GOBP%GO:0061097	0.0444698	0.15122	1	RAP2B,CAV1,HBEGF,DLG3,ADAM17,THY1,ACE,RELN,CBL,APP,NCK2,SRCIN1,GPRC5B,DOK7	1.45823	0.485137	14	28
[truncated: 2,847 more rows]
