# Supplementary material for: Multi-Omics Profiling of Hypertrophic Cardiomyopathy Reveals Altered Mechanisms in Mitochondrial Dynamics and Excitation–Contraction Coupling
Source: Int J Mol Sci. 2023 Mar 1;24(5):4724. doi: 10.3390/ijms24054724 (PMC10002553; doi:10.3390/ijms24054724)
Supplement: Supplementary file 1 [file ijms-24-04724-s001.zip › Supp_Table_S5.xlsx]

## Sheet: fgsea_Proteomics_fX403_human_hs
Term	Description	p.Val	FDR	Phenotype	Genes	NES	ES	Gene_Hits	Gene_Total
GLYCOAMINOGLYCAN-PROTEIN LINKAGE REGION BIOSYNTHESIS	GLYCOAMINOGLYCAN-PROTEIN LINKAGE REGION BIOSYNTHESIS	0.000136166	0.0049445	-1	LAMA2,LAMB1,LAMC3,NID2,LAMA4,COL14A1,CHST14,HSPG2,GPC1,LAMC1,LAMC2,EFNB3,COL6A1,CHSY1,BGN,LAMA3,LAMA5,FBN1,LAMA1,LAMB2,EPHB2,AGRN,LRP1,APOA1,CSPG4,NID1,DCN,CD44,NPNT,TNC,MMP2,HS3ST3B1,VCAN,CKAP4,MMP14,SDC3,LTBP2,BMP1,VTN,PDGFB,NCAM1,PCOLCE,THBS1,CHRD,CHST12,HS3ST1,IGF2,GPC3	-2.0544	-0.528028	48	146
HEPARAN SULFATE BIOSYNTHESIS (LATE STAGES)	HEPARAN SULFATE BIOSYNTHESIS (LATE STAGES)	0.000138255	0.0049445	-1	LAMA2,CHST6,LAMB1,LAMC3,NID2,LAMA4,LUM,CHST14,HSPG2,GPC1,LAMC1,FMOD,PRELP,LAMC2,EFNB3,BGN,LAMA3,LAMA5,PLAUR,LAMA1,LAMB2,EPHB2,AGRN,LRP1,APOA1,CSPG4,NID1,DCN,PLEKHA5,TNC,HS3ST3B1,VCAN,SULT1A2,MMP14,SDC3,BMP1,VTN,PDGFB,NCAM1	-1.98004	-0.513997	39	137
CHONDROITIN AND DERMATAN BIOSYNTHESIS	CHONDROITIN AND DERMATAN BIOSYNTHESIS	0.000139295	0.0049445	-1	COL14A1,CHST14,COL6A1,CHSY1,BGN,PTS,FBN1,PTPN13,COL5A1,HSPB2,MFAP2,CSPG4,DCN,CD44,FN1,ST3GAL4,TNC,MMP2,TMUB1,VCAN,FBXO17,MMP14,HDAC1,RNF213,NCAM1,HAPLN1,RBBP6,PCOLCE,THBS1,CHRD,RBL2,CHST12,IGF2,FBXO2	-1.6325	-0.42867	34	125
CHONDROITIN SULFATE BIOSYNTHESIS (LATE STAGES)	CHONDROITIN SULFATE BIOSYNTHESIS (LATE STAGES)	0.000142066	0.0049445	-1	CHST6,LUM,COL14A1,CHST14,HSPG2,GPC1,FMOD,PRELP,COL6A1,CHSY1,BGN,FBN1,AGRN,RASA3,CSPG4,SDF4,DCN,CD44,FN1,TNC,MMP2,HS3ST3B1,VCAN,SULT1A2,MMP14,SDC3,CBX8,NCAM1,CEPT1,KDM5B,CHRD,CHST12,HS3ST1,IGF2,GPC3	-1.76013	-0.469952	35	111
DERMATAN SULFATE BIOSYNTHESIS (LATE STAGES)	DERMATAN SULFATE BIOSYNTHESIS (LATE STAGES)	0.000142531	0.0049445	-1	CHST6,LUM,COL14A1,CHST14,HSPG2,GPC1,FMOD,PRELP,COL6A1,CHSY1,BGN,FBN1,AGRN,RASA3,CSPG4,DCN,CD44,FN1,TNC,MMP2,HS3ST3B1,VCAN,SULT1A2,MMP14,SDC3,NCAM1,CEPT1,PCOLCE,THBS1,CHRD,CHST12,HS3ST1,IGF2,GPC3,FGF2,SRC,GPC4,ACSL4,SLC35E1,MPDZ,GPC2,INS,ACTB,CANX,SDC4,CHST11,CDC42	-1.7476	-0.46723	47	110
PYRIMIDINE DEOXYRIBONUCLEOTIDES <IDE NOVO</I BIOSYNTHESIS I	PYRIMIDINE DEOXYRIBONUCLEOTIDES <IDE NOVO</I BIOSYNTHESIS I	0.000394789	0.0049445	1	PIK3R1,DNM1L,HSPA8,EEF2,NME2,EEF1A2,ISYNA1,TUBA1A,VASP,GOT1,PTEN,CFL1,NT5C2,OFD1,FXR2,PFN1,GLRX,EIF3B,RPS16,TUBB,TUBB4B,VCL,HSP90AA1,GRSF1,ASF1A,ACTA2,EVL,OTUB1,MAPK1,PLEKHF2,AKAP13,ABCE1,CNBP,CAP2,VCP,CNOT7,PARK2,DNAJA1,POLR1C,IKBKB,NME1,SVIL,HMGA2,RRAD,MOB4,KDM4A,RPSA,HSP90AB1,RUVBL2,DNAJA2,PSMA7,PRUNE,PFN2,DNM2,UBE2V1,TYMS,STRAP,UBA52,CDK5RAP2,TXN,TOMM40,NIF3L1,YWHAE,MAPK14,UPF2,RPS3,HSPA2,NED…	1.61438	0.365395	73	176
SALVAGE PATHWAYS OF PYRIMIDINE RIBONUCLEOTIDES	SALVAGE PATHWAYS OF PYRIMIDINE RIBONUCLEOTIDES	0.000396668	0.0049445	1	PIK3R1,NTMT1,EEF2,NME2,TRUB2,TPT1,ISYNA1,TUBA1A,EIF5A,VASP,GOT1,PTEN,CFL1,NT5C2,OFD1,FXR2,PFN1,KPNA1,RPS16,ATP5B,TUBB,TUBB4B,VCL,NUDT5,GRSF1,ACTA2,EVL,OTUB1,MAPK1,TIMM50,AKAP13,CAP2,VCP,PARK2,DVL2,POLR1C,IKBKB,NME1,SVIL,HMGA2,SEC24A,POLDIP2,RRAD,MOB4,PGD,MIPEP,FKBP1A,PFDN6,RUVBL2,PSMA7,PRUNE,PFN2,CCDC8,RPS6KB2,DNM2,UBE2V1,STRAP,FYN,CDK5RAP2,TOMM40,NIF3L1,YWHAE,MAPK14,EIF2B2,ACTA1,PGAM1,PGAM2,HSF1…	1.76666	0.400518	74	175
4-AMINOBUTYRATE DEGRADATION I	4-AMINOBUTYRATE DEGRADATION I	0.000404204	0.0049445	1	RPS4Y1,SIPA1L1,HSPA8,EEF2,HOMER3,RPL37,RPS29,EIF5B,RPS10,CRIPT,CAMK2D,EIF4G1,RPS14,HOMER1,RPS18,RPS16,RPLP1,PPP2R1A,RPS28,RPL36,RPL27,HSP90AA1,RPL36A,RPS19,RPS2,DLGAP4,RPL23,GSPT1,RPS20,RPL19,NR3C1,PABPC1,RPS5,RPL17,RPL10A,RPL11,RPS11,RPL4,FAU,NFKB1,DBNL,RPL38,RPS17,RPL3,SMG9,RPS8,UPF1,ETF1,DNAJA1,ACTN2,RPL12,RPL26,RPS21,GSPT2,CASC3,RPL13,RPL15,RHOC,RPL7,SRP54,SMG6,CAMK2G,RPS15A,NEFL,RPSA,HSP90AB…	1.78873	0.402865	80	183
ISOLEUCINE DEGRADATION I	ISOLEUCINE DEGRADATION I	0.000404204	0.0049445	1	KPNA2,PIN1,CLUH,HSPA8,HSPH1,ISYNA1,TRAPPC3,FERMT2,ACSS2,PARK7,MCC,CAMK2D,ATG5,HERC1,NARS,TRAF6,EEF1D,SMURF2,TNIK,MED20,HOMER1,PPP2R5E,PPM1B,PPP2R1A,LSM1,HSP90AA1,VDAC1,PPP2R5A,FERMT1,OTUB1,PFAS,MAPK1,ABCE1,AKR1A1,CNBP,USP15,VCP,DVL2,ATPAF2,ECHS1,CAPN1,CAMK2G,PSMD4,HSP90AB1,AARS,CUL3,COPS5,GABARAPL2,GAPDH,USP19,USP10,HNRNPK,CS,TAF12,MBD2,HSPA2,ITPA,UBA1,NEDD8,ACO2,NPEPPS,TRAF4,UBA5,HSPA6,EIF1B,MAR…	1.53013	0.34591	66	180
GLUTARYL-COA DEGRADATION	GLUTARYL-COA DEGRADATION	0.000410172	0.0049445	1	PGM5,PABPC4,EIF1,CLUH,HSPA8,EEF2,HSPH1,UGP2,CBS,EIF5A,ACSS2,EIF3C,OLA1,GOT1,MCC,ATG5,ENO3,NARS,TRAF6,TNIK,MED20,PPP2R1A,HSP90AA1,VDAC1,EIF3I,VARS,PRDX2,ACTA2,PABPC1,OTUB1,PFAS,MAPK1,CNDP2,ABCE1,AKR1A1,PRMT5,CNBP,PFKP,GARS,VCP,EIF3A,RHOC,HSD17B10,EEF1G,AHCY,PGD,PSMD4,HSP90AB1,AARS,CUL3,COPS5,GABARAPL2,HK1,EIF4A2,TRAPPC8,GAPDH,PPIA,USP10,HNRNPK,GPI,EIF4A1,CS,YWHAE,ACTA1,HSPA2,PPA1,UBA1,FH,NEDD8,ACO…	1.53515	0.344606	77	187
KETOLYSIS	KETOLYSIS	0.000410846	0.0049445	1	PGM5,PABPC4,NTN1,EIF1,CLUH,HSPA8,EEF2,HSPH1,UGP2,CBS,EIF5A,ACSS2,EIF3C,OLA1,MCC,ATG5,NARS,TRAF6,TNIK,MED20,PPP2R1A,HSP90AA1,VDAC1,EIF3I,VARS,PRDX2,ACTA2,ERGIC3,PABPC1,OTUB1,PFAS,MAPK1,CNDP2,ABCE1,AKR1A1,PRMT5,CNBP,PFKP,GARS,VCP,EIF3A,RHOC,C1QBP,EEF1G,PGD,PSMD4,HSP90AB1,AARS,CUL3,COPS5,GABARAPL2,EIF4A2,GAPDH,PPIA,USP10,HNRNPK,GPI,EIF4A1,CS,YWHAE,ACTA1,HSPA2,PPA1,FH,ECHDC1,NEDD8,ACO2,NPEPPS,TRAF4,C…	1.52443	0.341867	74	188
GLUTAMATE DEGRADATION II	GLUTAMATE DEGRADATION II	0.000413052	0.0049445	1	GLRX2,DSTN,CFL2,PIN1,EIF1,CLUH,HSPA8,EEF2,NME2,TPT1,EEF1A2,HSPH1,ISYNA1,TARS,UGP2,CBS,PMM2,BTF3L4,ACSS2,EIF3C,PRKAR1A,OLA1,CFL1,MCC,ATG5,C11ORF68,SEPT5,ENO3,NARS,TNIK,GLRX,HSP90AA1,VDAC1,EIF3I,VARS,TARSL2,PRDX2,ACTA2,ATP5C1,EIF4E,PFKP,GARS,MAT2A,PMM1,VCP,EIF3A,SLC25A6,NME1,USO1,EEF1G,AHCY,PGD,PSMD4,FKBP1A,HSP90AB1,AARS,HK1,SLC25A5,EIF4A2,GAPDH,PPIA,GPI,EIF4A1,CS,TXN,ATP5A1,YWHAE,HMGCS1,CTPS2,SLC2…	1.53165	0.342647	79	192
ASPARTATE BIOSYNTHESIS	ASPARTATE BIOSYNTHESIS	0.000413052	0.0049445	1	GLRX2,DSTN,CFL2,PIN1,EIF1,CLUH,HSPA8,EEF2,NME2,TPT1,EEF1A2,HSPH1,ISYNA1,TARS,UGP2,CBS,PMM2,BTF3L4,ACSS2,EIF3C,PRKAR1A,OLA1,CFL1,MCC,ATG5,C11ORF68,SEPT5,ENO3,NARS,TNIK,GLRX,HSP90AA1,VDAC1,EIF3I,VARS,TARSL2,PRDX2,ACTA2,ATP5C1,EIF4E,PFKP,GARS,MAT2A,PMM1,VCP,EIF3A,SLC25A6,NME1,USO1,EEF1G,AHCY,PGD,PSMD4,FKBP1A,HSP90AB1,AARS,HK1,SLC25A5,EIF4A2,GAPDH,PPIA,GPI,EIF4A1,CS,TXN,ATP5A1,YWHAE,HMGCS1,CTPS2,SLC2…	1.53165	0.342647	79	192
PHENYLALANINE DEGRADATION IV (MAMMALIAN, VIA SIDE CHAIN)	PHENYLALANINE DEGRADATION IV (MAMMALIAN, VIA SIDE CHAIN)	0.000413052	0.0049445	1	GLRX2,DSTN,CFL2,PIN1,EIF1,CLUH,HSPA8,EEF2,NME2,TPT1,EEF1A2,HSPH1,ISYNA1,TARS,UGP2,CBS,PMM2,BTF3L4,ACSS2,EIF3C,OLA1,CFL1,MCC,ATG5,C11ORF68,SEPT5,ENO3,NARS,TNIK,GLRX,HSP90AA1,VDAC1,EIF3I,VARS,TARSL2,PRDX2,ASPSCR1,ACTA2,ATP5C1,EIF4E,PFKP,GARS,MAT2A,PMM1,VCP,EIF3A,SLC25A6,NME1,USO1,EEF1G,AHCY,PGD,PSMD4,FKBP1A,HSP90AB1,AARS,HK1,SLC25A5,EIF4A2,GAPDH,PPIA,GPI,EIF4A1,CS,TXN,ATP5A1,YWHAE,HMGCS1,CTPS2,SLC2…	1.64415	0.367817	79	192
PENTOSE PHOSPHATE PATHWAY (OXIDATIVE BRANCH)	PENTOSE PHOSPHATE PATHWAY (OXIDATIVE BRANCH)	0.0004158	0.0049445	1	NPPA,PABPC4,TAGLN,DNAJB5,HSPA8,EEF2,NME2,EEF1A2,HSPH1,ISYNA1,TARS,PMM2,RCHY1,OLA1,RPS10,SIRT2,ENO3,RRAGA,TRAF6,OFD1,HSPB1,PPP2R1A,LSM1,HSP90AA1,CDK4,RPS2,VARS,TARSL2,PRDX2,ACTA2,PABPC1,USP5,RPS11,PSMA5,GLO1,CNBP,PGLS,MAT2A,PMM1,IPO4,DNAJA1,PSMB6,NME1,ISG15,RPL13,EEF1G,AHCY,PGD,PSMD4,FKBP1A,RPSA,HSP90AB1,RPS7,PSMA1,IMPA1,DNAJA2,PSMA7,EIF4A2,RBPMS,PSMB3,PSMB4,GAPDH,IDE,USP13,USP10,EIF4A1,UBA52	1.52602	0.340096	67	198
CARDIOLIPIN BIOSYNTHESIS II	CARDIOLIPIN BIOSYNTHESIS II	0.000417711	0.0049445	1	RPS4Y1,MAP1LC3B,FGFR1,ADH5,HSPA8,MYH11,EEF2,RPL37,PRKAR1A,RPS29,RNH1,RPS10,EIF4G1,ATG5,RPS14,SQSTM1,RPS18,RPS16,RPLP1,DMD,PPP2R1A,RPS28,HARS,RPL36,RPL27,RPL36A,CDK4,RPS19,RPS2,CKB,RPL23,GSPT1,RPS20,UBL4A,RPL19,PABPC1,RPS5,PEPD,STAU1,ATG16L1,RPL17,RPL10A,RPL11,RPS11,RPL4,FAU,PDLIM1,RPL38,RPS17,RPL3,SMG9,RPS8,PCNA,UPF1,ETF1,ATG7,RPL12,RPL26,RPS21,SLC25A6,GSPT2,CASC3,RPL13,RPL15,RPL7,SRP54,SMG6,RPS1…	1.73484	0.386747	86	199
<IMYO</I-INOSITOL BIOSYNTHESIS	<IMYO</I-INOSITOL BIOSYNTHESIS	0.000417711	0.0049445	1	PIN1,CLUH,HSPA8,EEF2,NME2,AKR1B1,ANXA6,ISYNA1,CBS,PMM2,EIF5A,PREP,GOT1,SNX3,WDR1,ENO3,EEF1D,ATP5B,PPP2R1A,EIF2S2,SNX12,HSP90AA1,VDAC1,EIF2S1,ARHGDIA,YWHAB,ACTA2,INPP5F,EIF4E,GDI2,ABCE1,AKR1A1,ASNA1,PCNA,CNBP,GALT,PGLS,CAP2,MAT2A,VCP,DNAJA1,ECHS1,ASS1,SLC25A6,NME1,UBA3,GDI1,HSD17B10,RPS15A,AHCY,PGD,FKBP1A,VDAC3,HSP90AB1,RUVBL2,IMPA1,HK1,DNAJA2,SLC25A5,GAPDH,POLE2,UCHL3,HSPA9,GPI,EIF4A1,CS,TXN,ATP5…	1.57757	0.351688	84	199
THREONINE DEGRADATION II	THREONINE DEGRADATION II	0.000419111	0.0049445	1	FBXL22,RNF115,RLIM,SIAH1,EEF1A2,MRPS2,MRPS23,MRPL41,MRPS11,MTRF1L,CHCHD1,MRPS18B,MRPS14,NDUFAF5,NUB1,MRPL51,SIAH2,COPS4,MRPS18A,MRPL23,PTCD3,MRPL50,MRPS26,DAP3,MRPS16,MRPS9,MRPS22,MRPL54,MRPS21,MRPS7,MRPS5,FBXL7,COPS2,MRPL14,CLPX,RPL11,AURKAIP1,MRPS28,MRPL57,MTIF3,MRPS30,MRPL36,MRPS17,MRPS25,MRPS24,TCEB2,VCP,MRPS33,FBXL4,DDB1,MRPL43,MRPL38,UBA3,MRPL45,MRPS34,MRPL28,MRPS31,MRRF,MRPL27,SENP8,MRPL11…	1.95091	0.433752	95	202
GDP-MANNOSE BIOSYNTHESIS	GDP-MANNOSE BIOSYNTHESIS	0.000421408	0.0049445	1	RANBP6,COMTD1,NEURL4,CLUH,HSPA8,EEF2,NME2,TUBB6,EEF1A2,HSPH1,GPN1,ABCF3,TUBA1A,PMM2,STK38,NAP1L4,NAP1L1,NARS,KPNA1,TUBB,TUBB4B,LSM1,HSP90AA1,VDAC1,ANKRD1,VARS,IPO5,PRDX2,STK38L,ACTA2,TP53RK,PRKCA,GTF2H3,IDH2,PCNA,CNBP,IPO7,MAT2A,PMM1,IPO4,DNAJA1,GART,SLC25A6,IKBKB,NME1,ISG15,HSD17B10,EEF1G,PGD,PSMD4,VDAC3,HSP90AB1,COPS5,RUVBL2,DNAJA2,SLC25A5,EIF4A2,GAPDH,HSPA9,USP10,GPI,EIF4A1,CTPS2,SLC25A4,CCT4,…	1.51905	0.337379	74	203
ARGININE DEGRADATION I (ARGINASE PATHWAY)	ARGININE DEGRADATION I (ARGINASE PATHWAY)	0.000423012	0.0049445	1	KHDRBS3,EIF1,HSPA8,NME2,TPT1,TUBB6,EEF1A2,HSPH1,TARS,ATG101,TUBA1A,CBS,EIF5A,PRKAR1A,GOT1,CFL1,MCC,ENO3,TRAF6,GLRX,KPNA1,ATP5B,TUBB,PPP2R1A,CCDC51,TUBB4B,HSP90AA1,VDAC1,VARS,PRDX2,PABPC1,OTUB1,ATP5C1,STAU1,MAPK1,OGDHL,IDH2,EIF4E,NFKB1,PSMA5,RANBP1,GARS,MAT2A,DMWD,DNAJA1,GART,SLC25A6,NME1,RHOC,PFDN2,EIF6,HSD17B10,EEF1G,AHCY,NUDT3,PSMD4,RPSA,HSP90AB1,AARS,GABARAPL2,HK1,DNAJA2,SLC35F6,SLC25A5,CCDC8,…	1.546	0.341428	96	211
TYROSINE BIOSYNTHESIS IV	TYROSINE BIOSYNTHESIS IV	0.000430849	0.0049445	1	RPS4Y1,EIF3K,EEF2,RPL37,EIF3C,EIF5,RPS29,EIF5B,NDUFAF5,RPS10,EIF3E,EIF4G1,RPS14,EIF3B,RPS18,RPS16,RPLP1,ATP5B,PPP2R1A,RPS28,RPL36,ATP5I,RPL27,EIF2S2,RPL36A,ATP5O,EIF3I,RPS19,RPS2,EIF2S1,RPL23,GSPT1,RPS20,RPL19,PABPC1,RPS5,ATP5C1,RPL17,RPL10A,RPL11,RPS11,RPL4,FAU,EIF4E,ATP5L,RPL38,RPS17,RPL3,SMG9,RPS8,UPF1,ETF1,EIF3M,EIF3A,RPP38,RPL12,QDPR,RPL26,RPS21,GSPT2,PCBD1,EIF3F,LTV1,CASC3,RPP21,RPL13,EIF3D…	2.12108	0.467096	96	217
TRNA SPLICING	TRNA SPLICING	0.00078064	0.00855156	-1	HIST1H2BM,SYF2,H2AFV,HIST1H2BN,CHERP,RNPS1,PRCC,HIST3H2BB,SRSF9,DCP1A,CPSF2,PQBP1,RBM17,POLR2I,FIP1L1,WBP11,HIST1H2AC,LSM2,SRSF4,HNRNPU,POLR2D,CWC15,SIN3A,SNRPA,LSM4,CPSF4,PCF11,PTBP1,HIST1H2AJ,PPIE,HNRNPR,PRPF8,SNRPB2,U2SURP,CWC27,SRSF11,SNW1,SUPT16H,LSM7,ISY1,PABPN1,CDC5L,HIST2H2AB,SNRPN,ZCRB1,PRPF19,DDX46,SNRPA1,H3F3A,SRRM1,RBM22,CCAR1,PPWD1,HNRNPA3,WBP4,PRPF40A,SF3B6,HNRNPA0,SNRPC,SF3B2,PRPF4…	-1.53897	-0.37934	116	216
L-CYSTEINE DEGRADATION II	L-CYSTEINE DEGRADATION II	0.000822368	0.00861699	1	PGM5,PABPC4,CLUH,HSPA8,EEF2,TUBB6,EEF1A2,HSPH1,UGP2,TUBA1A,CBS,EIF5A,ACSS2,OLA1,PPID,NAP1L4,NAP1L1,ATG5,ENO3,NARS,C12ORF10,EIF3B,TUBB,TUBB4B,HSP90AA1,VARS,ACTA2,PABPC1,PFAS,RPTOR,AKR1A1,PPP2R2D,PRMT5,PPAT,CNBP,PFKP,GARS,VCP,IPO4,EIF3A,DVL2,GSPT2,KPNA4,EIF6,EEF1G,AHCY,PGD,PSMD4,CSNK2B,HSP90AB1,AARS,HK1,CCT7,EIF4A2,GAPDH,HSPA9,USP10,GPI,EIF4A1,CS,ATP5A1,YWHAE,CTPS2,ACTA1,HSPA2,PPA1,UBA1,ACO2,NPEPPS…	1.46684	0.328324	72	190
3-PHOSPHOINOSITIDE BIOSYNTHESIS	3-PHOSPHOINOSITIDE BIOSYNTHESIS	0.00157525	0.0158182	-1	VAMP8,YES1,ERLIN2,GNAQ,FARP2,AP2M1,AP2A2,FGFR1OP2,LYN,PIP5K1A,PIK3C2A,PIP5K1C,PI4KA,CD2AP,HRAS,ZMYM2,PDGFB,EPN1,SNX9,ERBB3,AXL,CTNNB1,GNA14,LDLRAP1,JAK1,RHOG,FGF2,RAC1,VAMP7,AP2B1,KIRREL,GNA11,SRC	-1.5872	-0.425758	33	107
D-<IMYO</I-INOSITOL (1,4,5)-TRISPHOSPHATE BIOSYNTHESIS	D-<IMYO</I-INOSITOL (1,4,5)-TRISPHOSPHATE BIOSYNTHESIS	0.00174064	0.0167798	-1	PLCD1,GNAZ,ERLIN2,TTC7B,GNAQ,SLC9A3R1,GNAI3,FARP2,AP2A2,GNB1,FGFR1OP2,LYN,PIP5K1A,PIP5K1C,PI4KA,PAK1,GNAI2,HRAS,ZMYM2,PDGFB,PLCL2,PIP4K2A,KRIT1,GNA14,PIP4K2C,RAP1A,FGF2,RAC1,AP2B1,ARF6,GNA11,PIP4K2B,SRC	-1.6062	-0.439004	33	94
THYROID HORMONE METABOLISM II (VIA CONJUGATION AND/OR DEGRADATION)	THYROID HORMONE METABOLISM II (VIA CONJUGATION AND/OR DEGRADATION)	0.00240964	0.0221579	-1	CHST6,LUM,CHST14,HSPG2,GPC1,FMOD,PRELP,PPL,BGN,AGRN,CSPG4,RAP2C,DCN,NCOA6,SP1,HS3ST3B1,VCAN,SULT1A2,ATF7,SMN1,SDC3,HDAC1,JUN,UGDH,PRKCD,RBL2,CHST12,HS3ST1,GPC3,CYB5A,RHOA,JUND,VAMP7,NCOA1,SRC,RAP2B,CAV1	-1.55716	-0.414106	37	114
ASPARTATE DEGRADATION II	ASPARTATE DEGRADATION II	0.00248242	0.0221579	1	GLRX2,NTN1,PIN1,HSPA8,EEF2,NME2,ARHGEF6,AKR1B1,EEF1A2,ANXA6,HSPH1,ISYNA1,EIF5A,PARK7,GOT1,MDH1,MCC,ATG5,C11ORF68,EEF1D,TNIK,GLRX,MED20,ATP5B,HARS,TUBB4B,HSP90AA1,VDAC1,ARHGDIA,YWHAB,GRSF1,GDI2,PCNA,GARS,VCP,PARK2,ACTN2,NME1,ISG15,HSPE1,USO1,GDI1,HSD17B10,RPS15A,PGD,PSMD4,FKBP1A,HSP90AB1,COPS5,GABARAPL2,CCDC8,CAT,EIF4A2,MAX,GAPDH,UCHL3,HSPA9,EIF4A1,CS,TXN,MAPRE3,FDXR,HARS2,MAPK14,HUWE1,CTPS2,PGAM1…	1.42233	0.317942	80	194
2-OXOGLUTARATE DECARBOXYLATION TO SUCCINYL-COA	2-OXOGLUTARATE DECARBOXYLATION TO SUCCINYL-COA	0.00293378	0.0252515	1	RPS4Y1,RANBP6,DYRK2,NTN1,CLUH,HSPA8,EEF2,NME2,GLUD2,TPT1,EEF1A2,HSPH1,ISYNA1,PRKAR1A,RHOT2,GOT1,SURF1,NAP1L1,SIAH2,ENO3,PDK2,PEBP1,FLII,RPS18,KPNA1,GATB,TUBB4B,RPL27,HSP90AA1,VDAC1,IPO5,OTUB1,RPL17,ARIH2,TAF9B,RPL4,OGDHL,RPS17,RPL3,CNBP,MAT2A,VCP,IPO4,ACTN2,SLC25A6,NME1,CAPZA2,ISG15,RPL13,RPL15,PDP1,RPL7,EARS2,HSD17B10,PSMD4,RPSA,VDAC3,HSP90AB1,RPL8,RPS7,GABARAPL2,SLC25A5,PRUNE,PFN2,NOB1,GAPDH,ID…	1.44262	0.320743	70	202
KETOGENESIS	KETOGENESIS	0.00326664	0.0271469	1	GLRX2,ACADVL,HSPA8,EEF2,TUBB6,EEF1A2,HSPH1,IGBP1,MCC,ATG5,TRAF6,TNIK,GLRX,MED20,PPP2R5E,KPNA1,TUBB,PPP2R1A,TUBB4B,VDAC1,PPP2R5A,ACTA2,CLN5,OTUB1,RPL17,PFAS,MAPK1,RPL4,ICA1,ABCE1,AKR1A1,PPP2R2D,PSMA5,CNBP,PFKP,MAT2A,DNAJA1,RPL13,RPL7,HSD17B10,EEF1G,RPS15A,PSMD4,RPSA,HSP90AB1,PSMA1,CUL3,COPS5,GABARAPL2,PSMA7,PSMB3,PSMB4,GAPDH,FCHSD2,USP10,HNRNPK,RPL30,HMGCS1,FLAD1,ACTA1,PGAM1,HSPA2,PGAM2,NEDD8,TRAF…	1.40745	0.316248	76	186
UDP-<IN</I-ACETYL-D-GLUCOSAMINE BIOSYNTHESIS II	UDP-<IN</I-ACETYL-D-GLUCOSAMINE BIOSYNTHESIS II	0.00458142	0.0361264	1	RANBP6,TNPO1,NTN1,HSPA8,TUBB6,EEF1A2,CTSL,ABCF3,TUBA1A,GPD1L,NAGK,TTC27,NARS,KPNA1,ATP5B,MRPS16,TUBB,TUBB4B,HSP90AA1,VARS,IPO5,RPL23,PRDX2,ACTA2,PGM3,RPS8,CNBP,PFKP,IPO7,ARFGEF1,MAT2A,IPO4,CTSD,LSM3,SLC25A6,HSPE1,HMGA2,EEF1G,MRPL11,PSMD4,HSP90AB1,AARS,TNRC18,CUL3,RUVBL2,SLC25A5,EIF4A2,GAPDH,HSPA9,USP10,EIF4A1,UBA52,TUFM,NIF3L1,YWHAE,ATP2A2,CTPS2,SLC25A4,CCT4,ACTA1,HSPA2,UBA1,NEDD8,CCT3,ACO2,PRKAC…	1.40828	0.313745	82	200
ALL-<ITRANS</I-DECAPRENYL DIPHOSPHATE BIOSYNTHESIS	ALL-<ITRANS</I-DECAPRENYL DIPHOSPHATE BIOSYNTHESIS	0.00464696	0.0361264	-1	SYF2,NDUFS1,CHERP,PRCC,NDUFV2,PRKCD,CPSF2,NDUFS6,PQBP1,NDUFA5,RBM17,POLR2I,FIP1L1,WBP11,LSM2,SRSF4,HNRNPU,POLR2D,CWC15,SNRPA,LSM4,CPSF4,PCF11,PTBP1,PPIE,NDUFV3,NDUFA12,HNRNPR,PRPF8,NDUFA2,SNRPB2,U2SURP,CWC27,SRSF11,LSM7,ISY1,PABPN1,CDC5L,SNRPN,PRPF19,DDX46,SNRPA1,SRRM1,RBM22,CCAR1,COQ6,NDUFA9,PPWD1,HNRNPA3,WBP4,PRPF40A,SF3B6,NDUFA6,SNRPC,PRPF4,PRPF31,SNRNP40,CRNKL1,HNRNPC,CTNNBL1,LSM6,SF3B1,DHX16…	-1.42456	-0.349722	110	224
S-ADENOSYL-L-METHIONINE BIOSYNTHESIS	S-ADENOSYL-L-METHIONINE BIOSYNTHESIS	0.00590468	0.0444696	1	RANBP6,MSRB3,CLUH,HSPA8,MYH11,EEF2,EEF1A2,HSPH1,GPN1,ABCF3,TUBA1A,EIF3C,DRG1,KPNA1,PPP2R1A,HSP90AA1,VARS,IPO5,PRDX2,ACTA2,CLPX,OGDHL,GTF2H3,PPP2R2D,MAT2B,CNBP,PFKP,IPO7,ARFGEF1,MAT2A,IPO4,CNOT7,DNAJA1,SARS2,POLR1C,SLC25A6,COPG1,HMGA2,HGS,LONP2,PGD,PSMD4,MYH10,HSP90AB1,RUVBL2,DNAJA2,SLC25A5,PSMA7,CNOT4,EIF4A2,CNOT2,GAPDH,HSPA9,USP10,EIF4A1,YWHAE,HMGCS1,CTPS2,SLC25A4,CCT4,ACTA1,PGAM1,ARCN1,HSPA2,PG…	1.38239	0.306816	76	204
LEUCINE DEGRADATION I	LEUCINE DEGRADATION I	0.00702189	0.0498552	1	PGM5,PABPC4,ACADVL,PIN1,CLUH,HSPA8,EEF2,EEF1A2,HSPH1,UGP2,RAB3GAP1,CBS,EIF5A,GFOD1,ACSS2,OLA1,PTEN,ENO3,NARS,ATXN2,LSM1,HSP90AA1,VARS,PABPC1,OTUB1,ATP5C1,PFAS,NFKB1,AKR1A1,PRMT5,PFKP,GARS,VCP,PARK2,DNAJA1,RARS2,DVL2,C1QBP,HSD17B10,EEF1G,AHCY,PGD,HSP90AB1,AARS,CUL3,COPS5,GABARAPL2,HK1,EIF4A2,MAX,GAPDH,HSPA9,PPIA,GPI,EIF4A1,CS,IVD,YWHAE,HUWE1,PJA1,MBD2,PGAM1,HSPA2,PPA1,PGAM2,UBA1,NEDD8,ACO2,NPEPPS	1.36973	0.306424	69	192
PENTOSE PHOSPHATE PATHWAY (NON-OXIDATIVE BRANCH)	PENTOSE PHOSPHATE PATHWAY (NON-OXIDATIVE BRANCH)	0.00703351	0.0498552	1	DCLK2,ADAM19,NTN1,PIN1,NTMT1,DNAJB5,HSPA8,NME2,AKR1B1,ANXA6,ITGB1BP2,HSPH1,ISYNA1,ACSS2,DCLK1,MCC,ATG5,PTPN11,C11ORF68,TRAF6,SQSTM1,FXR2,KPNA1,MRPS16,PPP2R1A,HARS,LSM1,ARHGDIA,YWHAB,PRDX2,KLC1,DPH2,MAPK1,WDR45,PCNA,CNBP,VCP,DNAJA1,ATPAF2,GART,NME1,ISG15,HSPE1,PPP5C,NOVA1,RPIA,EIF6,HSD17B10,MRPL11,PGD,RAB4A,PSMD4,PFDN6,CUL3,COPS5,GABARAPL2,MRPL17,DNAJA2,TNPO3,CAT,GAPDH,UCHL3,HSPA9,USP10,ISCA2,MAPR…	1.35967	0.303935	69	194
ADENINE AND ADENOSINE SALVAGE VI	ADENINE AND ADENOSINE SALVAGE VI	0.00903862	0.0607081	1	PGM5,PABPC4,FGFR1,CLUH,ADH5,HSPA8,EEF2,TUBB6,HSPH1,GPN1,UGP2,TUBA1A,CBS,EIF5A,ACSS2,PRKAR1A,OLA1,ENO3,NARS,TUBB,DMD,HARS,TUBB4B,HSP90AA1,VDAC1,CDK4,CKB,VARS,UBL4A,ACTA2,PABPC1,ATP5C1,PFAS,MAPK1,AKR1A1,PRMT5,PCNA,PFKP,GARS,GALT,MAT2A,VCP,DNAJA1,SLC25A6,NPLOC4,EEF1G,AHCY,PGD,PSMD4,VDAC3,HSP90AB1,AARS,HK1,DNAJA2,EIF4A2,GAPDH,HSPA9,GPI,EIF4A1,CS,TXN,TAF12,YWHAE,CTPS2,SLC25A4,ACTA1,HSPA2,PPA1,UBA1,ACO…	1.35264	0.303341	75	188
PROLINE BIOSYNTHESIS I	PROLINE BIOSYNTHESIS I	0.00906843	0.0607081	1	HSPA8,EEF2,TUBB6,EEF1A2,HSPH1,TUBA1A,PARK7,MCC,PPID,NAP1L4,NAP1L1,ENO3,EIF2B3,DOHH,KPNA1,DAP3,MRPS16,TUBB,TUBB4B,EIF2S2,HSP90AA1,EIF3I,NUDT5,EIF2B4,PRDX2,ACTA2,MAPK1,RC3H1,EIF2B5,CNBP,PFKP,GALT,IPO7,MAT2A,VCP,DNAJA1,GART,SLC25A6,NPLOC4,COPG1,HMGA2,EEF1G,AHCY,MRPL11,HSP90AB1,CUL3,RUVBL2,HK1,DNAJA2,SLC25A5,CCT7,FKBPL,MAX,GAPDH,HSPA9,USP10,CS,ATP5A1,MYO18A,YWHAE,EIF2B2,CTPS2,SLC25A4,CCT4,ACTA1,PGAM1…	1.36246	0.304844	74	191
PRPP BIOSYNTHESIS I	PRPP BIOSYNTHESIS I	0.00975213	0.0635207	1	RPS4Y1,FGFR1,NTMT1,DNAJB5,ADH5,HSPA8,EEF2,TUBB6,EEF1A2,TARS,TUBA1A,FAM96A,PRKAR1A,NAP1L4,NAP1L1,KLHL13,KPNA1,TUBB,DMD,PPP2R1A,HARS,TUBB4B,HSP90AA1,VDAC1,CDK4,CKB,TARSL2,UBL4A,PABPC1,RPS5,PEPD,RPL10A,RPL4,NFKB1,RPL3,PCNA,IPO4,PARK2,UBXN1,SLC25A6,PDP1,HMGA2,EIF6,PSMD4,RPSA,VDAC3,HSP90AB1,COPS5,HK1,XIAP,SPG21,MAX,TAX1BP3,HSPA9,USP10,PRPSAP2,CDK5RAP2,TXN,RPL30,YWHAE,HUWE1,CTPS2,SLC25A4,HSPA2	1.35209	0.305556	64	181
UREA CYCLE	UREA CYCLE	0.0119538	0.0748028	1	HSPA8,EEF2,TPT1,TUBB6,HSPH1,ATG101,TUBA1A,CBS,LAMP1,ASCC2,CFL1,C11ORF68,ENO3,DOHH,KPNA1,ATP5B,TUBB,RPL36,CCDC51,TUBB4B,HSP90AA1,VDAC1,ARAF,VARS,PRDX2,RAF1,PABPC1,ATP5C1,RPL11,EIF4E,AGO2,GALT,MAT2A,DNAJA1,FNTA,GART,ASS1,SLC25A6,AKTIP,RHOC,USP4,PPP5C,HSD17B10,EEF1G,AHCY,PSMD4,RPSA,HSP90AB1,GABARAPL2,HK1,MRPL17,DNAJA2,SLC25A5,CCDC8,QARS,NSFL1C,RICTOR,ALDH4A1,GAPDH,GPI,ATP5A1,SLC25A4,PGAM1,HSPA2,PGAM…	1.33854	0.299493	75	191
NADH REPAIR	NADH REPAIR	0.0121983	0.0748028	-1	MAT1A,RFC1,NCOA6,MOV10,LIG3,CHERP,RNPS1,ENO1,PRCC,POLD3,SRSF9,TCEB3,SF1,GTF2B,NOTCH3,CUL4B,INTS12,RBM17,POLR2I,FIP1L1,SSRP1,SRSF4,HNRNPU,CTR9,ELL,RBBP5,ZNF143,PRPF8,CWC27,SRSF11,SNW1,NELFB,RTF1,PKNOX1,PABPN1,CDC5L,ERCC6,SNRPN,ZCRB1,DDX46,RFC3,H3F3A,SRRM1,CCAR1,CDC73,WDR5,PPWD1,HNRNPA3,EP300,HNRNPA0,SF3B2,PRPF31,SF3B3,SF3A2,SNRNP40,NELFCD,TAF6,CTNNBL1,PBX1,LSM6,CSTF3,USP39,NCBP1,PAF1,RPRD2,NCBP2,S…	-1.37329	-0.339716	99	208
GALACTOSE DEGRADATION I (LELOIR PATHWAY)	GALACTOSE DEGRADATION I (LELOIR PATHWAY)	0.0126529	0.0748028	1	PABPC4,HSPA8,EEF2,TUBB6,EEF1A2,MRPS2,TUBA1A,TNK2,PRKAR1A,STK38,PPID,AGO4,ENO3,DOHH,KPNA1,TUBB4B,VDAC1,EIF3I,PRDX2,ACTA2,PABPC1,ATP5C1,PPP2R2D,PFKP,GALT,MAT2A,PMM1,VCP,IPO4,DMWD,DNAJA1,GART,PSMB6,SLC25A6,HMGA2,ACOX1,SRP54,EIF6,EEF1G,AHCY,GALM,PGD,HSP90AB1,CUL3,HK1,CCT7,EIF4A2,PSMB3,POLE2,HSPA9,EIF4A1,TUFM,ATP5A1,YWHAE,SLC25A4,CCT4,ACTA1,PGAM1,ARCN1,HSPA2,PPA1,PGAM2,DLST,NEDD8,CCT3,ACO2,NPEPPS,TUBB…	1.32527	0.294137	79	204
VALINE DEGRADATION I	VALINE DEGRADATION I	0.0127258	0.0748028	1	PIN1,ACOX3,CLUH,HSPA8,EEF2,MRPS2,HSPH1,ISYNA1,TRAPPC3,FERMT2,CBS,ACSS2,PARK7,MCC,ATG5,ENO3,NARS,TRAF6,EEF1D,SMURF2,TNIK,PPM1B,MRPS16,LSM1,HSP90AA1,VARS,FERMT1,PABPC1,PSME3,PFAS,AKR1A1,GARS,VCP,DVL2,ECHS1,MKRN2,ACOT9,CAPN1,HSD17B10,EEF1G,AHCY,HSP90AB1,AARS,GABARAPL2,HK1,GAPDH,HSPA9,GPI,CS,TAF12,MAPK14,MBD2,GLUL,PGAM1,HSPA2,ITPA,PGAM2,UBA1,ACO2,NPEPPS,UBA5,HSPA6,EIF1B,HACL1	1.33323	0.298605	64	189
ACETATE CONVERSION TO ACETYL-COA	ACETATE CONVERSION TO ACETYL-COA	0.0133278	0.0764761	1	EIF1,CLUH,HSPA8,EEF2,ABCF2,TUBB6,EEF1A2,HSPH1,TUBA1A,CBS,EIF5A,ACSS2,OLA1,GOT1,ENO3,NARS,KPNA1,TUBB,TUBB4B,HSP90AA1,VARS,PRDX2,ACTA2,PABPC1,PFAS,AKR1A1,PRMT5,RPL3,UPF1,PFKP,GARS,MAT2A,VCP,IPO4,SLC25A6,RHOC,CAMK1,HSD17B10,EEF1G,AHCY,PGD,RPSA,HSP90AB1,AARS,HK1,SLC25A5,MAX,GAPDH,HSPA9,PPIA,USP10,GPI,EIF4A1,CS,TXN,YWHAE,RPS3,SLC25A4,CCT4,ACTA1,PGAM1,HSPA2,PGAM2,UBA1,FH,NPEPPS,WARS,TUBB2A,HSPA6,EIF1B,…	1.32642	0.295989	79	197
FATTY ACID &BETA;-OXIDATION I	FATTY ACID &BETA;-OXIDATION I	0.0141287	0.0774334	1	ACAA1,SLC27A4,NEURL4,CLUH,HSPA8,HECW2,SIAH1,TUBB6,EEF1A2,TRAPPC3,FERMT2,CBS,PARK7,ZNF16,HERC2,NT5C2,RRAGA,SMURF2,SQSTM1,TUBB,TUBB4B,VCL,CYB5R3,YWHAB,SLC27A6,FERMT1,STAU1,TAF9B,YBX1,MAPK1,WASL,PPP6R2,IPO7,PPP3CB,PARK2,ECHS1,PPP6R1,CAPN1,HMGA2,ACOX1,MINOS1,RABAC1,HSD17B10,LONP2,PSMD4,RPSA	1.34539	0.305343	46	172
ETHANOL DEGRADATION IV	ETHANOL DEGRADATION IV	0.0141372	0.0774334	1	TNPO1,NTMT1,DNAJB5,CLUH,HSPA8,MYH11,EEF2,TUBB6,EEF1A2,HSPH1,TUBA1A,CBS,ACSS2,PARK7,PRKAR1A,OLA1,PTPN11,ENO3,KPNA1,TUBB,PPP2R1A,TUBB4B,LSM1,HSP90AA1,ASF1A,PRDX2,MAPK1,PPP6R2,UPF1,CNBP,MAT2A,IPO4,DNAJA1,ASS1,SLC25A6,HSPE1,PPP6R1,SRP54,EIF6,HSD17B10,EEF1G,PGD,PSMD4,MYH10,HSP90AB1,PSMA1,RUVBL2,DNAJA2,SLC25A5,CAT,CAT,EIF4A2,GAPDH,HSPA9,USP10,HNRNPK,EIF4A1,PLAA,FDXR,HUWE1,EIF2B2,SLC25A4,PGAM1,HSPA2,PGA…	1.31729	0.293576	76	198
4-HYDROXYPROLINE DEGRADATION I	4-HYDROXYPROLINE DEGRADATION I	0.0155071	0.0816643	1	CADPS,ACAA1,DNM1L,HABP4,HSPA8,TUBB6,EEF1A2,VPS35,SNAP91,TUBA1A,MFN2,MYL9,DPYSL3,NAP1L4,KIFC3,CBFB,MFN1,SH3GL3,DAPK1,PTPN23,TUBB,DYNC1H1,TUBB4B,HSP90AA1,VDAC1,CKB,RPL23,RPS20,YWHAB,ACTA2,CKMT2,YBX1,PRKCA,MAPK1,AGO2,SNCA,GAK,RPS8,RANBP1,PARK2,DNAJA1,DVL2,ECHS1,SLC25A6,GSK3B,CKMT1A,USP47,ADCK5,C1QBP,MIPEP,SPAG9,HSP90AB1,SLC25A5,PRKD1,DNM2,MAPK8IP3	1.30574	0.29031	56	202
CITRULLINE DEGRADATION	CITRULLINE DEGRADATION	0.0156581	0.0816643	1	PGM5,PABPC4,DSTN,HSPA8,EEF2,TPT1,EEF1A2,UGP2,TUBA1A,CBS,UBE2N,GPD1L,CFL1,PPID,ENO3,KPNA1,ATP5B,TUBB,TUBB4B,VDAC1,VARS,PRDX2,ACTA2,NFX1,PABPC1,ATP5C1,EIF4E,ARPC4,ETF1,PFKP,GALT,MAT2A,VCP,IPO4,DNAJA1,GART,SLC25A6,RHOC,ACOX1,EEF1G,AHCY,PGD,PSMD4,FKBP1A,HSP90AB1,HK1,MRPL17,SLC25A5,UBE2V1,PSMB3,GAPDH,HSPA9,PPIA,USP10,GPI,ISCA2,ATP5A1,ACTR3,YWHAE,SLC25A4,CCT4,ACTA1,PGAM1,HSPA2,PPA1,PGAM2,UBA1,DLST,FH,C…	1.30734	0.289978	86	205
RETINOATE BIOSYNTHESIS I	RETINOATE BIOSYNTHESIS I	0.0159262	0.0816643	1	TNPO1,DNAJB5,CLUH,HSPA8,MYH11,EEF2,NME2,TPT1,TUBB6,EEF1A2,HSPH1,TARS,TUBA1A,CBS,ACSS2,PRKAR1A,GOT1,CFL1,ENO3,GLRX,ATP5B,TUBB,TUBB4B,LSM1,EIF2S2,VDAC1,EIF2S1,VARS,PRDX2,SRM,EIF4E,AKR1A1,CNBP,GALT,PPP3CB,MAT2A,IPO4,DNAJA1,GART,ASS1,SLC25A6,NME1,RHOC,SRP54,GDI1,EARS2,EEF1G,AHCY,PGD,PSMD4,MYH10,HSP90AB1,RUVBL2,HK1,DNAJA2,SLC25A5,EIF4A2,GAPDH,IDE,USP10,GPI,EIF4A1,ATP5A1,SLC25A4,PGAM1,HSPA2,PGAM2,UBA1,…	1.30169	0.28941	78	202
CYSTEINE BIOSYNTHESIS/HOMOCYSTEINE DEGRADATION	CYSTEINE BIOSYNTHESIS/HOMOCYSTEINE DEGRADATION	0.0165044	0.0828661	1	PIN1,NTMT1,CLUH,HSPA8,TUBB6,EEF1A2,HSPH1,UGP2,TUBA1A,CBS,KATNB1,EIF3C,PRKAR1A,SEC31A,NAP1L4,NAP1L1,ZNF593,ENO3,ZNF622,C12ORF10,FXR2,EIF3B,KPNA1,TUBB,TUBB4B,OTUB1,VBP1,PFAS,AKR1A1,PPAT,NMD3,GARS,ARFGEF1,EIF3A,DNAJA1,DVL2,RHOC,SEC24A,PPP5C,RPL7,KPNA4,EIF6,EARS2,HGS,RSL24D1,PGD,PSMD4,HSP90AB1,AARS,PSMA1,DNAJA2,NSA2,EIF4A2,HSPA9,GNL3L,EIF4A1,GPSM1,EIF2B2,SKIV2L,HSPA2,UBA1,RPF2,NEDD8,CCT3,BOP1,TUBB2A,…	1.29988	0.288324	68	205
BILE ACID BIOSYNTHESIS, NEUTRAL PATHWAY	BILE ACID BIOSYNTHESIS, NEUTRAL PATHWAY	0.0171168	0.0841866	1	PGM5,PABPC4,ADAM19,NTN1,CLUH,HSPA8,EEF2,AKR1B1,HSPH1,ISYNA1,UGP2,CBS,EIF5A,ACSS2,OLA1,ENO3,NARS,MED20,ZFP1,HSP90AA1,PITPNA,VARS,PIN4,PABPC1,PFAS,IPO8,AKR1A1,PRMT5,PFKP,GARS,VCP,SLC25A6,PPP5C,ACOX1,EEF1G,LONP2,AHCY,PGD,PSMD4,PFDN6,HSP90AB1,AARS,HK1,SLC25A5,EIF4A2,GAPDH,GPI,EIF4A1,CS,YWHAE,AKR7A2,SLC25A4,HSPA2,PPA1,UBA1,ACO2,NPEPPS,CCT8,HSPA6	1.34144	0.308893	59	155
MELATONIN DEGRADATION I	MELATONIN DEGRADATION I	0.0191297	0.092205	-1	CHST6,CHST14,ADAMTSL4,ATF2,PPL,CYP27A1,HSPB2,CYP51A1,RAP2C,HS3ST3B1,SULT1A2,SMN1,JUN,UGDH,CYP2S1,RBL2,ACAD8,A2M,CHST12,HS3ST1,CYB5A,PGRMC1,JUND,VAMP7,LONP1,CD36,RAP2B	-1.44518	-0.397054	27	91
PROLINE BIOSYNTHESIS II (FROM ARGININE)	PROLINE BIOSYNTHESIS II (FROM ARGININE)	0.0242399	0.114546	1	KHDRBS3,HSPA8,EEF2,TPT1,TUBB6,EEF1A2,HSPH1,PARK7,CFL1,MCC,NAP1L4,NAP1L1,ENO3,TRAF6,DOHH,KPNA1,ATP5B,MRPS16,TUBB,PPP2R1A,TUBB4B,VDAC1,VARS,PRDX2,PABPC1,OTUB1,ATP5C1,STAU1,MAPK1,EIF4E,NFKB1,RC3H1,CNBP,GALT,DMWD,GART,SLC25A6,RHOC,NPLOC4,HMGA2,PFDN2,EIF6,HSD17B10,EEF1G,AHCY,MRPL11,NUDT3,PSMD4,HSP90AB1,CUL3,HK1,MRPL17,SLC35F6,SLC25A5,FKBPL,MAX,GAPDH,HSPA9,USP10,GPI,ATP5A1,HUWE1,EIF2B2,SLC25A4,PGAM1,HS…	1.27952	0.286943	75	188
TETRAHYDROBIOPTERIN BIOSYNTHESIS II	TETRAHYDROBIOPTERIN BIOSYNTHESIS II	0.0250417	0.116059	1	RANBP6,DSTN,CFL2,NTMT1,DNAJB5,HSPA8,TUBB6,EEF1A2,HSPH1,TUBA1A,CBS,EIF5A,EIF3C,PPID,AGO4,NAP1L4,NAP1L1,FXR2,PPP2R5E,PPM1B,KPNA1,ATP5B,TUBB,TUBB4B,HSP90AA1,AHSA1,EIF3I,ANP32A,IPO5,PPP2R5A,PRDX2,ACTA2,ATP5C1,EIF4E,PFKP,GALT,CDK16,IPO7,CAP2,MAT2A,VCP,IPO4,EIF3A,DNAJA1,OSBPL9,EIF6,PGD,CSNK2B,VDAC3,HSP90AB1,CUL2,RUVBL2,DNAJA2,SLC25A5,CCT7,NSA2,EIF4A2,GIT2,PSMB3,MAX,HSPA9,PPIA,GPI,EIF4A1,UBA52,CS,YWHAE,…	1.26593	0.283043	86	195
D-MANNOSE DEGRADATION	D-MANNOSE DEGRADATION	0.0257834	0.117242	1	PGM5,PABPC4,FGFR1,CLUH,ADH5,HSPA8,EEF2,TPT1,EEF1A2,HSPH1,ISYNA1,UGP2,TUBA1A,CBS,EIF5A,ACSS2,PRKAR1A,OLA1,RNH1,ENO3,NARS,APEH,DMD,HARS,HSP90AA1,CDK4,ANKRD1,CKB,VARS,UBL4A,PABPC1,ATP5C1,PEPD,PFAS,EIF4E,AKR1A1,PRMT5,PCNA,PFKP,GARS,VCP,ASS1,SLC25A6,EEF1G,AHCY,PGD,HSP90AB1,AARS,RUVBL2,HK1,EIF4A2,GAPDH,HSPA9,GPI,EIF4A1,CS,TXN,YWHAE,SLC25A4,HSPA2,PPA1,UBA1,DLST,ACO2,NPEPPS	1.28277	0.290817	65	175
MINERALOCORTICOID BIOSYNTHESIS	MINERALOCORTICOID BIOSYNTHESIS	0.0290055	0.129451	-1	ADAMTSL4,ATF2,GATM,GPX7,CYP27A1,CDH1,CHEK2,HSPB2,FDX1,CYP51A1,SC5D,LYN,HDAC1,ENO1,JUN,CYP2S1,AGPAT2,STK11,CRABP1,RBL2,LBR,A2M,TMED10,HSD17B7,CYB5A,SIN3A,RNF40,TUBB2B,PGRMC1,JUND,TM7SF2,LONP1,CD36,SRC	-1.35868	-0.352812	34	136
GLUCOCORTICOID BIOSYNTHESIS	GLUCOCORTICOID BIOSYNTHESIS	0.0329914	0.144562	-1	ADAMTSL4,ATF2,GPX7,CYP27A1,JUP,CDH1,CHEK2,HSPB2,FDX1,CYP51A1,CTNNA1,SC5D,LYN,IQGAP1,HDAC1,JUN,CYP2S1,STK11,CTNNB1,CRABP1,RBL2,LBR,A2M,IGF2,HSD17B7,CYB5A,SIN3A,RNF40,PGRMC1,JUND,TM7SF2,LONP1,CD36,SRC,CAV1,ZMPSTE24	-1.35312	-0.353533	36	130
SPERMIDINE BIOSYNTHESIS I	SPERMIDINE BIOSYNTHESIS I	0.0357001	0.153638	1	RANBP6,FGFR1,POLR2M,ADH5,HSPA8,EEF2,TPT1,TUBB6,EEF1A2,CBS,PRKAR1A,RNH1,NAP1L4,NAP1L1,ENO3,RPL36AL,HSPB1,APEH,ATP5B,TUBB,DMD,HARS,TUBB4B,RPL36A,ATP5O,CDK4,CKB,VARS,IPO5,UBL4A,PRDX2,ACTA2,PABPC1,OTUB1,ATP5C1,PEPD,SRM,EIF4E,ABCE1,PCNA,SHC1,IPO7,IPO4,DMWD,DNAJA1,SLC25A6,EIF6,AHCY,PSMD4,HK1,DNAJA2,SLC25A5,NSA2,EIF4A2,QARS,MAX,HSPA9,USP10,GPI,EIF4A1,TXN,ATP5A1,YWHAE,SLC25A4,MTHFD2,ACTA1,PGAM1,PPA1,PGAM…	1.26097	0.285874	70	175
PYRUVATE DECARBOXYLATION TO ACETYL COA	PYRUVATE DECARBOXYLATION TO ACETYL COA	0.039653	0.167656	1	MAP1LC3B,RANBP6,DYRK2,NTN1,CLUH,HSPA8,NME2,RIC8A,TUBB6,EEF1A2,HSPH1,ISYNA1,ATG101,TUBA1A,MCC,SURF1,PDK2,PEBP1,PHGDH,TUBB,PPP2R1A,TUBB4B,IPO5,SH3D19,YWHAB,ACTA2,OTUB1,STAU1,TAF9B,MAPK1,OGDHL,NFKB1,ABCE1,PICK1,CNBP,MAT2A,IPO4,DNAJA1,ACTN2,QDPR,NME1,USO1,PDP1,PFDN1,EIF6,HSD17B10,PSMD4,HSP90AB1,ANXA7,DNAJA2	1.24061	0.27754	50	192
TRNA CHARGING	TRNA CHARGING	0.0403998	0.167868	1	HSPA8,MYH11,EEF2,EEF1A2,HSPH1,PIK3CA,TARS,METAP1,PARK7,PRKAR1A,RRAGC,L1RE1,NARS,RRAGA,EEF1D,HSPB1,MRPS16,PPP2R1A,HARS,LSM1,HSP90AA1,VARS,TARSL2,GRSF1,OTUB1,HDGF,YBX1,AIMP2,MAPK1,RPTOR,ABCE1,SNCA,LAMTOR1,CNBP,GARS,SLX4,MAT2A,RARS2,SARS2,CTSD,NAPRT,FARSB,ISG15,DTX2,MTOR,HMGA2,MRPL27,EARS2,EEF1G,PGD,RAB4A,PSMD4,MYH10,HSP90AB1,CUL2,AARS,RARS,QARS,PRRC2A,HSPA9,RNF11,USP10,IFT22,BAG2,YARS,YWHAE,HARS2,K…	1.2327	0.274628	79	200
PHOSPHOLIPASES	PHOSPHOLIPASES	0.0435995	0.178093	-1	PLCD1,GNAZ,STXBP1,ERLIN2,GNAQ,SLC9A3R1,GNAI3,GNB1,FGFR1OP2,LYN,PAK1,GNAI2,HRAS,ZMYM2,PDGFB,PLD1,PLCL2,KRIT1,GNA14,S100A10,RAP1A,FGF2,RAC1,GNA11,SRC	-1.36925	-0.381915	25	82
CDP-DIACYLGLYCEROL BIOSYNTHESIS I	CDP-DIACYLGLYCEROL BIOSYNTHESIS I	0.0457955	0.183945	1	RPS4Y1,PABPC4,SLC27A4,HSPA8,TUBB6,EEF1A2,HSPH1,GPN1,ABCF3,SIRT2,SLC38A1,ENO3,EIF2B3,TXNDC15,EIF2B4,SLC27A6,ATP2A3,ERGIC3,CLN5,PABPC1,CLPX,RPL4,CNDP2,ANKRD28,RPL3,CAP2,ARFGEF1,MAT2A,IPO4,GSK3B,RPL13,HMGA2,RPL7,TIMM23,RPSA,VDAC3,HSP90AB1,RPS7,RUVBL2,DNAJA2,PSMA7,SSBP1,CNOT2,GAPDH,TSG101,IDE,GPI,ATP2A2,UPF2,CTPS2,CCT4,HSPA2,CNOT1,CAND2,FH,REL	1.23222	0.278899	56	176
HISTAMINE DEGRADATION	HISTAMINE DEGRADATION	0.0493421	0.192335	1	MAP1LC3B,CRMP1,TNPO1,DNAJB5,CLUH,HSPA8,MYH11,EEF2,TUBB6,EEF1A2,HSPH1,TUBA1A,CBS,ACSS2,PRKAR1A,NAP1L4,CAMK2D,NAP1L1,ENO3,TPMT,OFD1,CEP135,TUBB,PPP2R1A,TUBB4B,LSM1,ASF1A,PRDX2,RPS11,PPP6R2,CNBP,MAT2A,IPO4,DNAJA1,ASS1,SLC25A6,HSPE1,PPP6R1,SRP54,EIF6,PGD,PSMD4,MYH10,CUL3,RUVBL2,GABARAPL2,DNAJA2,SLC35F6,SLC25A5,EIF4A2,HSPA9,USP10,HNRNPK,GALE,EIF4A1,PLAA,FDXR,HUWE1,SLC25A4,PGAM1,HSPA2,PGAM2,RPF2,NEDD8,…	1.22875	0.275032	70	190
OXIDATIVE ETHANOL DEGRADATION III	OXIDATIVE ETHANOL DEGRADATION III	0.0494802	0.192335	1	MAP1LC3B,CRMP1,TNPO1,DNAJB5,CLUH,HSPA8,MYH11,EEF2,TUBB6,EEF1A2,HSPH1,TUBA1A,CBS,ACSS2,PRKAR1A,OLA1,NAP1L4,NAP1L1,ENO3,KPNA1,TUBB,PPP2R1A,TUBB4B,LSM1,HSP90AA1,ASF1A,PRDX2,PPP6R2,UPF1,CNBP,MAT2A,IPO4,DNAJA1,ASS1,SLC25A6,HSPE1,PPP6R1,SRP54,EIF6,HSD17B10,EEF1G,PGD,PSMD4,MYH10,HSP90AB1,RUVBL2,GABARAPL2,DNAJA2,SLC35F6,SLC25A5,EIF4A2,GAPDH,HSPA9,USP10,HNRNPK,EIF4A1,PLAA,FDXR,HUWE1,SLC25A4,PGAM1,HSPA2,PG…	1.21987	0.271865	74	198
THIO-MOLYBDENUM COFACTOR BIOSYNTHESIS	THIO-MOLYBDENUM COFACTOR BIOSYNTHESIS	0.052816	0.19933	-1	HIST1H1D,HSPG2,GPC1,LAMC1,HIST1H1C,DSP,MGMT,SLC2A3,JUP,CDH1,ZKSCAN1,HMGA1,AGRN,SLC2A1,LRP1,MYH8,APOA1,MYH3,CD44,HIST1H1E,RALB,SDC3,PFKL,H2AFX,BMP1,TPR,NCAM1,PYGM,HIST1H1B,HLA-C,MYL6B,PTPRF,UMPS,GPC3,DES,TRIM27,HSP90B1,POU2F1,XRCC5,CD36,SRC,XRCC6,TCF3,GPC4,PDIA4,YBX3,RPA2,PRKAR2A,GPC2,TOP2A,SDC4,PRKCSH,G6PD,FDPS,RRAS,MYH7,CD46,TOP1,UNG,RAB3A	-1.28122	-0.325336	60	163
CMP-<IN</I-ACETYLNEURAMINATE BIOSYNTHESIS I (EUKARYOTES)	CMP-<IN</I-ACETYLNEURAMINATE BIOSYNTHESIS I (EUKARYOTES)	0.0529341	0.19933	-1	HIST1H1D,LAMC1,GNAZ,HIST1H1C,STXBP1,DSP,MGMT,SLC2A3,JUP,CDH1,ZKSCAN1,HMGA1,SLC2A1,MYH8,ERCC2,CMAS,MYH3,CD44,HIST1H1E,RALB,XRCC1,HIST1H2BC,PFKL,H2AFX,TPR,JUN,NCAM1,PYGM,HIST1H1B,VAPA,HLA-C,PML,MYL6B,COG3,PTPRF,UMPS,RSBN1L,CDKN2AIP,DES,TRIM27,HSP90B1,POU2F1,XRCC5,SRC,RSBN1,SON,XRCC6	-1.27489	-0.320905	47	177
CHOLINE BIOSYNTHESIS III	CHOLINE BIOSYNTHESIS III	0.0544809	0.201998	1	KPNA2,LCMT1,NTN1,HSPA8,HSPH1,TUBA1A,PLD3,CFL1,PPID,DOHH,CEP170,KPNA1,CEP135,RPL27,HSP90AA1,EIF3I,PEA15,ACTA2,ERGIC3,PSME3,AGAP3,VBP1,BCL2L1,PRKCA,MAPK1,RPL4,RPTOR,NFKB1,WASL,SNCA,RPS17,RPL3,PFKP,RPS6KA3,VCP,IPO4,DNAJA1,ACOT9,MTOR,RPL7,HGS,HSP90AB1,NTAN1,RPL8,CUL3,ANXA7,DNAJA2,MAX,GAPDH,PKN1,FCHSD2,ECM29	1.21898	0.275903	52	176
PREGNENOLONE BIOSYNTHESIS	PREGNENOLONE BIOSYNTHESIS	0.0604411	0.220701	-1	ADAMTSL4,ATF2,GPX7,CYP27A1,PRDM16,CDH1,CHEK2,HSPB2,FDX1,CYP51A1,SC5D,LYN,HDAC1,FHIT,JUN,CYP2S1,AGPAT2,STK11,CRABP1,RBL2,STAT6,LBR,A2M,TMED10,HSD17B7,CYB5A,SIN3A,RNF40,PGRMC1,JUND,TM7SF2,LONP1,CD36,SRC	-1.2819	-0.329684	34	145
GLUCONEOGENESIS I	GLUCONEOGENESIS I	0.0623974	0.224444	1	UBE2H,HSPA8,MYH11,GLUD2,EEF1A2,HSPH1,TUBA1A,PRKAR1A,ZNF16,GOT1,MDH1,ENO3,TRAF6,ATP5B,DYNC1H1,TUBB4B,LSM1,HSP90AA1,VDAC1,CKB,GSPT1,PRDX2,ACTA2,CKMT2,USP5,LDHB,RPTOR,ABCE1,SNCA,PCNA,UPF1,NMD3,IPO4,PARK2,DNAJA1,ACTN2,LSM3,SLC25A6,GSPT2,ISG15,HSPE1,MTOR,HSD17B10,PGD,PSMD4,MYH10,VDAC3,HSP90AB1,HK1,DNAJA2,SLC25A5,GAPDH,USP13,AKT3,FYN,GPI,CS,TXN,ATP5A1,FDXR,UPF2,SLC25A4,ACTA1,PGAM1,HSPA2,PGAM2,FH,UVRAG,…	1.20686	0.270301	76	189
ANDROGEN BIOSYNTHESIS	ANDROGEN BIOSYNTHESIS	0.0639098	0.226504	1	RPS4Y1,CYP2J2,DSTN,CFL2,BRAF,HSPA8,EEF1A2,TAX1BP1,DLC1,CORO2B,PRKAR1A,CFL1,MCC,BUB1,SEPT5,EIF2B3,RPL36,RPL27,VDAC1,APC,SMAD2,EIF2B4,RPL10A,CORO6,RPL4,PLEKHF2,RPS17,EIF2B5,RPL3,RPS8,CNBP,ARFGEF1,DNAJA1,RPL12,RPL7,RPAIN,VDAC3,HSP90AB1,RPS7,DNAJA2,MAX,USP10,ARPC2,TXN,RPL30,ACTR3,FDXR,EIF2B2	1.23617	0.288444	48	143
URATE BIOSYNTHESIS/INOSINE 5'-PHOSPHATE DEGRADATION	URATE BIOSYNTHESIS/INOSINE 5'-PHOSPHATE DEGRADATION	0.0710105	0.248022	1	RPS4Y1,ASB2,CPVL,NTMT1,HSPA8,HECW2,NME2,GLMN,HSPH1,EIF5B,SEC31A,MCC,NT5C2,ATG5,OFD1,TNIK,FXR2,CEP170,KPNA1,AHSA1,ATP5O,APLP1,TP53RK,DNAAF5,MAPK1,NFKB1,ABCE1,PPP2R2D,NT5C3A,CNBP,PARK2,NME1,RPL13,HSPBP1,COPG1,HMGA2	1.20594	0.274383	36	169
GLYCOGEN BIOSYNTHESIS II (FROM UDP-D-GLUCOSE)	GLYCOGEN BIOSYNTHESIS II (FROM UDP-D-GLUCOSE)	0.0746151	0.256889	1	MAP1LC3B,RANBP6,DNAJB5,HSPA8,EEF1A2,HSPH1,UGP2,TUBA1A,CBS,PRKAR1A,SIRT2,CEP135,PPP2R1A,IPO5,RPS5,PPP1R7,ARIH2,VBP1,TAF9B,AIMP2,RPL4,UPF1,CNBP,SLX4,IPO4,DNAJA1,GYG1,GART,ISG15,GSK3B,RPL13,DCTN4,NOVA1,CAMK1,EARS2,PGD,HSP90AB1,COPS5,RUVBL2,GABARAPL2,DNAJA2,PRUNE,UBE2V1,MAX,USP10,ISCA2,GPSM1,YWHAE,MAPK14,EIF2B2,HSPA2,NEDD8,UVRAG,CCT3,PRKACA,CSNK1E,CCT8,HSPA6,SH3GLB1,CDK2,DCAF15,RPL7A,DNAJB1,TUBB8,AGL…	1.19639	0.270789	72	176
HYPUSINE BIOSYNTHESIS	HYPUSINE BIOSYNTHESIS	0.0777687	0.263976	1	UBE2H,VASH1,FGFR1,DNAJB5,ADH5,HSPA8,EEF2,HSPH1,TUBA1A,PMM2,EIF5A,XPO4,PRKAR1A,OLA1,PPID,ENO3,DOHH,KPNA1,DMD,HSP90AA1,EIF3I,CDK4,UBL4A,ACTA2,PABPC1,MAPK1,PCNA,CNBP,PFKP,GALT,MAT2A,PMM1,VCP,DNAJA1,SLC25A6,GSK3B,COPG1,EEF1G,HSP90AB1,RUVBL2,DNAJA2,SLC25A5,CCT7,GAPDH,IDE,HSPA9,ARPC2,CS,TXN,ATP5A1,NIF3L1,YWHAE,SLC25A4,CCT4,ACTA1,PGAM1,ARCN1,HSPA2,PGAM2,DLST,REL	1.19186	0.268132	61	185
D-<IMYO</I-INOSITOL-5-PHOSPHATE METABOLISM	D-<IMYO</I-INOSITOL-5-PHOSPHATE METABOLISM	0.0820102	0.274506	-1	PLCD1,GNAZ,ERLIN2,GNAQ,SLC9A3R1,GNAI3,GNB1,FGFR1OP2,LYN,PAK1,GNAI2,HRAS,ZMYM2,PDGFB,PLD1,PLCL2,PIP4K2A,KRIT1,GNA14,PIP4K2C,RAP1A,FGF2,RAC1,GNA11,PIP4K2B,SRC	-1.28862	-0.356024	26	87
L-DOPA DEGRADATION	L-DOPA DEGRADATION	0.0858863	0.283542	-1	COMT,HIST1H1D,COL1A2,LAMC1,GNAZ,HIST1H1C,DSP,MGMT,SLC2A3,JUP,CDH1,ZKSCAN1,HMGA1,SLC2A1,MYH8,ERCC2,MYH3,CD44,FN1,HIST1H1E,NCL,USP6NL,RALB,XRCC1,PFKL,H2AFX,TPR,NCAM1,PYGM,HIST1H1B,HLA-C,MYL6B,PTPRF,UMPS,DES,TRIM27,HSP90B1,FGF2,POU2F1,XRCC5,SRC,SON,XRCC6	-1.22846	-0.309787	43	174
METHIONINE DEGRADATION I (TO HOMOCYSTEINE)	METHIONINE DEGRADATION I (TO HOMOCYSTEINE)	0.0885655	0.288436	1	RANBP6,CLUH,HSPA8,HECW2,MYH11,EEF2,EEF1A2,HSPH1,GPN1,ABCF3,TUBA1A,EIF3C,KPNA1,PPP2R1A,HSP90AA1,VARS,IPO5,PRDX2,ACTA2,FBXL7,CLPX,GTF2H3,PPP2R2D,MAT2B,CNBP,PFKP,SLX4,C1ORF50,ARFGEF1,MAT2A,IPO4,DNAJA1,SARS2,SLC25A6,HMGA2,HGS,LONP2,AHCY,PGD,PSMD4,MYH10,HSP90AB1,DNAJA2,SLC25A5,CNOT4,EIF4A2,CNOT2,GAPDH,HSPA9,USP10,EIF4A1,UBA52,YWHAE,MAPK14,HMGCS1,CTPS2,SLC25A4,CCT4,ACTA1,PGAM1,ARCN1,HSPA2,PGAM2,DLST,MO…	1.17427	0.261702	75	198
MELATONIN DEGRADATION II	MELATONIN DEGRADATION II	0.0967056	0.309785	-1	HIST1H1D,ATP2B1,LAMC1,GNAZ,HIST1H1C,SLC9A1,DSP,MGMT,SLC2A3,JUP,CDH1,ZKSCAN1,HMGA1,HSPB2,SLC2A1,MYH8,ERCC2,MYH3,CD44,NDRG1,HIST1H1E,NCL,MAOA,RALB,XRCC1,PFKL,H2AFX,TPR,NCAM1,PYGM,HIST1H1B,HLA-C,MYL6B,PTPRF,UMPS	-1.21179	-0.303977	35	180
TETRAHYDROBIOPTERIN BIOSYNTHESIS I	TETRAHYDROBIOPTERIN BIOSYNTHESIS I	0.0976917	0.309785	1	RANBP6,DSTN,CFL2,NTMT1,DNAJB5,HSPA8,TUBB6,EEF1A2,HSPH1,TUBA1A,CBS,EIF5A,EIF3C,PPID,AGO4,NAP1L4,NAP1L1,FXR2,PPP2R5E,PPM1B,KPNA1,TUBB4B,AHSA1,EIF3I,CDK4,ANP32A,IPO5,PPP2R5A,PRDX2,ACTA2,ATP5C1,PFKP,CDK16,IPO7,CAP2,MAT2A,VCP,IPO4,EIF3A,DNAJA1,OSBPL9,EIF6,PGD,CSNK2B,VDAC3,HSP90AB1,CUL2,RUVBL2,DNAJA2,CCT7,NSA2,UBXN6,EIF4A2,GIT2,PSMB3,MAX,HSPA9,PPIA,EIF4A1,UBA52,CS,YWHAE,EIF2B2,ACTA1,HSPA2,PPA1,DLST,CCT…	1.17304	0.262463	73	191
SERINE BIOSYNTHESIS	SERINE BIOSYNTHESIS	0.100366	0.314132	1	RPS4Y1,MAP1LC3B,MPRIP,MSRB3,FGFR1,NTMT1,HSPA8,RIC8A,HSPH1,PRKAR1A,ATXN1,C11ORF68,C12ORF10,TNIK,PHGDH,PPP2R1A,RPS28,TUBB4B,HSP90AA1,CLN5,OTUB1,JMY,GAK,PSPH,ASNA1,ETF1,CAP2,DNAJA1,DDB1,ISG15,HMGA2,CAMK1,PGD,PFDN6,RPSA,HSP90AB1,CUL2,CUL3,GABARAPL2,DNAJA2,CCDC8,RPS6KB2,PAFAH1B1,MAX,HSPA9,USP10,HNRNPK,TXN,MAPK14,HUWE1,EIF2B2,PGAM1,HSPA2,PGAM2,UBA1,MOB1A,NEDD8,CCT3,BOP1,PRKACA,TUBB2A,CCT8,CDK1,HSPA6	1.16897	0.264174	64	181
ETHANOL DEGRADATION II	ETHANOL DEGRADATION II	0.102671	0.316979	1	TNPO1,DNAJB5,CLUH,ADH5,HSPA8,MYH11,EEF2,TUBB6,EEF1A2,HSPH1,TUBA1A,CBS,ACSS2,PRKAR1A,OLA1,ENO3,DRG1,KPNA1,TUBB,PPP2R1A,TUBB4B,LSM1,HSP90AA1,ASF1A,PRDX2,PPP6R2,UPF1,CNBP,MAT2A,IPO4,DNAJA1,ASS1,SLC25A6,HSPE1,PPP6R1,SRP54,EIF6,HSD17B10,EEF1G,PGD,PSMD4,MYH10,RPAIN,HSP90AB1,RUVBL2,DNAJA2,SLC25A5,EIF4A2,GAPDH,HSPA9,USP10,HNRNPK,EIF4A1,PLAA,FDXR,YWHAE,HUWE1,SLC25A4,PGAM1,HSPA2,PGAM2,RPF2,NEDD8,NPEPPS,TUB…	1.16283	0.259992	71	195
PUTRESCINE DEGRADATION III	PUTRESCINE DEGRADATION III	0.10468	0.316979	1	CRMP1,TNPO1,DNAJB5,CLUH,HSPA8,MYH11,EEF2,TUBB6,EEF1A2,HSPH1,TUBA1A,CBS,VASP,ACSS2,ABCB8,PRKAR1A,ENO3,HSPB1,TUBB,PPP2R1A,TUBB4B,LSM1,APLP1,ASF1A,PRDX2,PPP6R2,CNBP,MAT2A,IPO4,DNAJA1,ASS1,SLC25A6,SARAF,HSPE1,PPP6R1,SRP54,TCF25,EIF6,PGD,PSMD4,MYH10,RUVBL2,GABARAPL2,DNAJA2,SLC25A5,EIF4A2,HSPA9,USP10,HNRNPK,EIF4A1,PLAA,NIF3L1,FDXR,HUWE1,SLC25A4,PGAM1,HSPA2,PGAM2,RPF2,NEDD8,NPEPPS,TUBB2A,CSNK1E,CCT8,MRP…	1.16168	0.260183	67	189
FOLATE TRANSFORMATIONS I	FOLATE TRANSFORMATIONS I	0.105678	0.316979	1	MAP1LC3B,RABGAP1L,ADAM19,HSPA8,HECW2,EEF2,MTHFR,GLUD2,EEF1A2,HSPH1,ABCF3,GRK6,GOT1,NAP1L4,NAP1L1,KIF21A,KLHDC4,KPNA1,LSM1,ASF1A,OTUB1,PTRHD1,MAPK1,STRADA,KIAA0907,PCNA,STRIP1,ENOX2,UBR4,RNF10,ADAL,HGS,HERC4,PSMD4,HSP90AB1,RPL8,PSMA1,MTR,PRUNE,HSPA9,USP10,CS,YARS,NAB1,HARS2,HUWE1,ZBTB8OS,HSPA2,NEDD8,NPEPPS,DECR1,UBA5,HSPA6,EIF1B	1.17	0.265884	54	171
ARSENATE DETOXIFICATION I (GLUTAREDOXIN)	ARSENATE DETOXIFICATION I (GLUTAREDOXIN)	0.106537	0.316979	-1	HIST1H1D,LAMC1,ATF2,HIST1H1C,DSP,MGMT,SLC2A3,EPB41,JUP,IFI16,CDH1,ZKSCAN1,HMGA1,SLC2A1,MYH8,MYH3,CD44,HIST1H1E,MOV10,RALB,ENO1,H2AFX,TPR,JUN,NCAM1,NOS1AP,PYGM,HIST1H1B,HLA-C,MYL6B,RBL2,PTPRF,UMPS,TMED10,HSPA4L,TRIM27,LYRM1,HSP90B1,POU2F1,XRCC5,SRC,XRCC6,MCM2,TCF3,PDIA4,YBX3,RPA2,PRKAR2A,TOP2A,PRKCSH,TP53,G6PD,FDPS,RRAS,MYH7,CD46,UCHL5,TOP1,UNG,SUMO2	-1.20065	-0.302218	60	177
THIOREDOXIN PATHWAY	THIOREDOXIN PATHWAY	0.111805	0.328596	-1	TXNRD2,HIST1H1D,LAMC1,HIST1H1C,DSP,MGMT,ENO2,TANGO2,SLC2A3,JUP,CDH1,ZKSCAN1,HMGA1,PPP1R16A,SLC2A1,MYH8,MYH3,CD44,NCOA6,HIST1H1E,RALB,RP2,ENO1,H2AFX,TPR,PDIA6,NCAM1,PYGM,THRA,HIST1H1B,HLA-C,MYL6B,PTPRF,UMPS	-1.19561	-0.300051	34	179
PHOSPHATIDYLETHANOLAMINE BIOSYNTHESIS III	PHOSPHATIDYLETHANOLAMINE BIOSYNTHESIS III	0.115369	0.329047	-1	HIST1H1D,ATP2B1,LAMC1,GNAZ,HIST1H1C,SLC9A1,DSP,MGMT,SLC2A3,JUP,CDH1,ZKSCAN1,HMGA1,STOM,SLC2A1,MYH8,ERCC2,MYH3,CD44,HIST1H1E,NCL,RALB,XRCC1,SMN1,PTDSS2,PFKL,H2AFX,TPR,NCAM1,PYGM,HIST1H1B,HLA-C,MYL6B,PTPRF,UMPS	-1.19276	-0.298914	35	181
TCA CYCLE II (EUKARYOTIC)	TCA CYCLE II (EUKARYOTIC)	0.117307	0.329047	1	ACADVL,DNM1L,CLUH,HSPA8,EEF1A2,HSPH1,TUBA1A,ACSS2,PARK7,PRKAR1A,GOT1,MDH1,AGO4,PEBP1,SH3GL3,HSPB1,TUBB4B,TIMM13,HSP90AA1,PPP2R5A,UBL4A,YWHAB,GRSF1,OTUB1,YBX1,MAPK1,OGDHL,ABCE1,ILK,PCNA,CNBP,PFKP,ARFGEF1,MAT2A,PARK2,DNAJA1,GART,SLC25A6,HSPE1,COPG1,SRP54,HSD17B10,PSMD4,CSNK2B,HSP90AB1,CUL2,RUVBL2,SLC25A5,EIF4A2,USP10,EIF4A1,CS,FDXR,YWHAE,MAPK14,SLC25A4,CCT4,HSPA2,FH,NEDD8,UVRAG,ACO2,NPEPPS,TUBB2A,C…	1.15408	0.258181	70	192
CITRULLINE BIOSYNTHESIS	CITRULLINE BIOSYNTHESIS	0.118212	0.329047	1	KHDRBS3,HSPA8,EEF2,TPT1,TUBB6,HSPH1,ATG101,TUBA1A,ATXN10,CFL1,MCC,ENO3,TRAF6,KPNA1,ATP5B,TUBB,PPP2R1A,CCDC51,TUBB4B,HSP90AA1,VDAC1,VARS,PABPC1,OTUB1,ATP5C1,STAU1,SPATA20,MAPK1,EIF4E,NFKB1,GALT,MAT2A,DMWD,DNAJA1,NAPRT,GART,SLC25A6,RHOC,PFDN2,EIF6,HSD17B10,EEF1G,AHCY,NUDT3,PSMD4,RPSA,HSP90AB1,GABARAPL2,HK1,MRPL17,DNAJA2,SLC35F6,SLC25A5,CCDC8,ALDH4A1,GAPDH,USP10,GPI,UBA52,ATP5A1,HUWE1,SLC25A4,PGAM1,…	1.14672	0.255638	74	199
ACETONE DEGRADATION I (TO METHYLGLYOXAL)	ACETONE DEGRADATION I (TO METHYLGLYOXAL)	0.118785	0.329047	-1	ADAMTSL4,ATF2,BRD4,MLLT4,CYP27A1,ADD3,HSPB2,FDX1,CYP51A1,APOA1,HIST1H1E,IQGAP1,GTF2I,RAVER1,JUN,NUP35,CYP2S1,FURIN,HLA-C,CRABP1,PTPRF,ACAD8,A2M,CYB5A,RECQL,RXRA,PCSK6,PGRMC1,PCSK5,JUND,LONP1,CD36,MCM2,ZMPSTE24,VRK1	-1.21309	-0.315005	35	136
BUPROPION DEGRADATION	BUPROPION DEGRADATION	0.118785	0.329047	-1	ADAMTSL4,ATF2,BRD4,MLLT4,CYP27A1,ADD3,HSPB2,FDX1,CYP51A1,APOA1,HIST1H1E,IQGAP1,GTF2I,RAVER1,JUN,NUP35,CYP2S1,FURIN,HLA-C,CRABP1,PTPRF,ACAD8,A2M,CYB5A,RECQL,RXRA,PCSK6,PGRMC1,PCSK5,JUND,LONP1,CD36,MCM2,ZMPSTE24,VRK1	-1.21309	-0.315005	35	136
<IS</I-METHYL-5'-THIOADENOSINE DEGRADATION II	<IS</I-METHYL-5'-THIOADENOSINE DEGRADATION II	0.12863	0.351844	-1	HIST1H1D,LAMC1,GNAZ,ATF2,HIST1H1C,DSP,MGMT,SLC2A3,JUP,CDH1,ZKSCAN1,HMGA1,SLC2A1,MYH8,ERCC2,MYH3,CD44,HIST1H1E,NCL,RALB,XRCC1,PFKL,H2AFX,TPR,JUN,NCAM1,PYGM,HIST1H1B,HLA-C,MYL6B,RBL2,PTPRF,UMPS,DES,TRIM27,LYRM1,HSP90B1,POU2F1,XRCC5,SRC,SON,XRCC6,MCM2	-1.18215	-0.296257	43	181
ARGININE DEGRADATION VI (ARGINASE 2 PATHWAY)	ARGININE DEGRADATION VI (ARGINASE 2 PATHWAY)	0.129934	0.351844	1	KHDRBS3,HSPA8,EEF2,TUBB6,EEF1A2,HSPH1,ATG101,TUBA1A,PARK7,MCC,NAP1L4,NAP1L1,ENO3,TRAF6,DOHH,KPNA1,MRPS16,TUBB,PPP2R1A,CCDC51,TUBB4B,HSP90AA1,PRDX2,ACTA2,OTUB1,STAU1,MAPK1,NFKB1,RC3H1,CNBP,PFKP,VCP,DMWD,DNAJA1,NPLOC4,HMGA2,PFDN2,EIF6,HSD17B10,MRPL11,NUDT3,PSMD4,RPSA,HSP90AB1,CUL3,GABARAPL2,DNAJA2,SLC35F6,CCDC8,FKBPL,ALDH4A1,MAX,GAPDH,HSPA9,USP10,YWHAE,HUWE1,EIF2B2,CCT4,ACTA1,ARCN1,HSPA2,NEDD8,TUBB…	1.14325	0.255893	68	190
DOLICHOL AND DOLICHYL PHOSPHATE BIOSYNTHESIS	DOLICHOL AND DOLICHYL PHOSPHATE BIOSYNTHESIS	0.133177	0.356617	1	BRAF,FGFR1,SLC27A4,ADH5,HSPA8,EEF2,TPT1,AKR1B1,TUBB6,EEF1A2,HSPH1,TUBA1A,PRKAR1A,RNH1,ENO3,APEH,ATP5B,TUBB,DMD,HARS,TUBB4B,HSP90AA1,CDK4,RPS2,CKB,NPC2,GSPT1,UBL4A,SLC27A6,ACTA2,ERGIC3,PABPC1,PEPD,RPL4,AKR1A1,NQO2,PCNA,CNBP,IPO7,PPP3CB,IPO4	1.14414	0.259505	41	173
GLYCINE DEGRADATION (CREATINE BIOSYNTHESIS)	GLYCINE DEGRADATION (CREATINE BIOSYNTHESIS)	0.138893	0.367836	-1	HIST1H1D,ATP2B1,LAMC1,GNAZ,HIST1H1C,GATM,SLC9A1,DSP,MGMT,SLC2A3,JUP,CDH1,ZKSCAN1,HMGA1,SLC2A1,MYH8,ERCC2,MYH3,CD44,HIST1H1E,NCL,RALB,XRCC1,PFKL,H2AFX,TPR,NCAM1,PYGM,HIST1H1B,HLA-C,MYL6B,PTPRF,UMPS,TERF2IP,DES,TRIM27,HSP90B1,POU2F1,XRCC5,SRC,SON,XRCC6	-1.17326	-0.294442	42	179
XANTHINE AND XANTHOSINE SALVAGE	XANTHINE AND XANTHOSINE SALVAGE	0.145569	0.381327	-1	HIST1H1D,LAMC1,ATF2,HIST1H1C,DSP,MGMT,SLC2A3,EPB41,JUP,IFI16,CDH1,ZKSCAN1,HMGA1,SLC2A1,MYH8,MYH3,CD44,HIST1H1E,MOV10,RALB,ENO1,H2AFX,TPR,JUN,NCAM1,NOS1AP,PYGM,HIST1H1B,HLA-C,MYL6B,RBL2,PTPRF,UMPS,TMED10,HSPA4L,TRIM27,LYRM1,HSP90B1,POU2F1,XRCC5,SRC,XRCC6,MCM2,TCF3,PDIA4,YBX3,RPA2,PRKAR2A,TOP2A,PRKCSH,TP53,G6PD,FDPS,RRAS,MYH7,CD46,UCHL5,TOP1,UNG,SUMO2	-1.16956	-0.294391	60	177
TRYPTOPHAN DEGRADATION X (MAMMALIAN, VIA TRYPTAMINE)	TRYPTOPHAN DEGRADATION X (MAMMALIAN, VIA TRYPTAMINE)	0.14798	0.383476	1	MAP1LC3B,CRMP1,TNPO1,DNAJB5,CLUH,HSPA8,MYH11,EEF2,TUBB6,EEF1A2,HSPH1,TUBA1A,CBS,ACSS2,PRKAR1A,NAP1L4,NAP1L1,ENO3,OFD1,CEP135,TUBB,PPP2R1A,TUBB4B,LSM1,ASF1A,PRDX2,RPS11,PPP6R2,CNBP,MAT2A,IPO4,DNAJA1,ASS1,SLC25A6,HSPE1,PPP6R1,SRP54,EIF6,PGD,PSMD4,MYH10,CUL3,RUVBL2,GABARAPL2,DNAJA2,SLC35F6,SLC25A5,EIF4A2,HSPA9,USP10,HNRNPK,EIF4A1,PLAA,FDXR,HUWE1,SLC25A4,PGAM1,HSPA2,PGAM2,RPF2,NEDD8,NPEPPS,TUBB2A,CSN…	1.13041	0.252925	67	191
MEVALONATE PATHWAY I	MEVALONATE PATHWAY I	0.150668	0.386288	1	DCLK2,PIN1,HSPA8,EEF2,EEF1A2,HSPH1,EIF5A,KATNB1,DCLK1,MCC,MVD,ATG5,TRAF6,TNIK,MED20,PPP2R1A,MVK,VDAC1,PITPNA,RPS20,ACTA2,CLN5,OTUB1,SUGT1,UFD1L,MAPK1,ABCE1,PPAT,CNBP,PFKP,MAT2A,VCP,UBIAD1,HSD17B10,EEF1G,RPS15A,PSMD4,HSP90AB1,GABARAPL2,CCT7,PSMA7,MAX,GAPDH,HSPA9,USP10,HNRNPK,GPI,MLF2,UBA52,YARS,HMGCS1,ACTA1,PGAM1,HSPA2,PGAM2,NEDD8,TRAF4,STARD13,PSMA6,HSPA6,EIF1B,MARS2	1.12815	0.254496	62	182
UBIQUINOL-10 BIOSYNTHESIS (EUKARYOTIC)	UBIQUINOL-10 BIOSYNTHESIS (EUKARYOTIC)	0.159076	0.392329	-1	HIST1H1D,LAMC1,EPB41L3,HIST1H1C,EPB41L2,DSP,MGMT,SLC2A3,LIN7C,EPB41,JUP,CDH1,L2HGDH,SLC2A1,MYH8,MYH3,CD44,DLG1,HIST1H1E,RALB,H2AFX,TPR,NCAM1,PYGM,HIST1H1B,HLA-C,EPB41L5,MYL6B,PTPRF,UMPS,HSPA4L,TRIM27,HSP90B1,POU2F1,KIRREL,XRCC5,SRC,XRCC6,ADCK3,TCF3,LIN7A,PDIA4,PTPMT1,COQ3,RPA2,PRKAR2A,TOP2A,COQ6,PRKCSH,COQ7,G6PD,FDPS,RRAS,MYH7,CD46,TOP1,CASK,UNG	-1.15782	-0.290567	58	179
GLUTAMINE DEGRADATION I	GLUTAMINE DEGRADATION I	0.159341	0.392329	-1	HIST1H1D,LAMC1,GNAZ,ATF2,HIST1H1C,CISD3,DSP,MGMT,SLC2A3,JUP,CDH1,ZKSCAN1,HMGA1,SLC2A1,MYH8,ERCC2,MYH3,CD44,HIST1H1E,RALB,XRCC1,PFKL,GLS,H2AFX,TPR,NCAM1,PYGM,HIST1H1B,HLA-C,MYL6B,PTPRF,UMPS,HMGCL,DES,TRIM27,HSP90B1,POU2F1,ARF6,XRCC5,SRC,SON,XRCC6,MCM2,TCF3,PDIA4,PTPMT1,YBX3,RPA2,PRKAR2A,TOP2A,PRKCSH,PPA2,G6PD,FDPS,RRAS,MYH7,CDH2,CD46,TOP1,UNG	-1.15769	-0.290534	60	179
FATTY ACID ACTIVATION	FATTY ACID ACTIVATION	0.159536	0.392329	1	SLC27A4,CLUH,HSPA8,HECW2,EEF2,SIAH1,TUBB6,EEF1A2,HSPH1,CBS,RHOT2,ZNF16,NT5C2,ENO3,RRAGA,ATP5B,TUBB,TUBB4B,CYB5R3,EIF2S2,HSP90AA1,SLC27A6,PABPC1,STAU1,TAF9B,EIF4E,WASL,PPP6R2,GALT,IPO7,PPP3CB,PARK2,GART,SLC25A6,GSK3B,PPP6R1,MINOS1,RABAC1,PSMD4,RPSA,HSP90AB1,COPS5,HK1,SLC25A5,CCDC8,GAPDH,GPI,TUBGCP3,TRRAP,UPF2,SLC25A4,PGAM1,HSPA2,PGAM2,IFT140,UVRAG,ACO2,NMT1,TUBB2A,PAICS,HSPA6,WDR19,SLC25A3	1.12412	0.254218	63	178
FATTY ACID &ALPHA;-OXIDATION II	FATTY ACID &ALPHA;-OXIDATION II	0.159536	0.392329	1	SLC27A4,CLUH,HSPA8,HECW2,EEF2,SIAH1,TUBB6,EEF1A2,HSPH1,CBS,RHOT2,ZNF16,NT5C2,ENO3,RRAGA,ATP5B,TUBB,TUBB4B,CYB5R3,EIF2S2,HSP90AA1,SLC27A6,PABPC1,STAU1,TAF9B,EIF4E,WASL,PPP6R2,GALT,IPO7,PPP3CB,PARK2,GART,SLC25A6,GSK3B,PPP6R1,MINOS1,RABAC1,PSMD4,RPSA,HSP90AB1,COPS5,HK1,SLC25A5,CCDC8,GAPDH,GPI,TUBGCP3,TRRAP,UPF2,SLC25A4,PGAM1,HSPA2,PGAM2,IFT140,UVRAG,ACO2,NMT1,TUBB2A,PAICS,HSPA6,WDR19,SLC25A3	1.12412	0.254218	63	178
LANOSTEROL BIOSYNTHESIS	LANOSTEROL BIOSYNTHESIS	0.161445	0.392939	-1	HIST1H1D,LAMC1,GNAZ,HIST1H1C,DSP,MGMT,SLC2A3,JUP,CDH1,ZKSCAN1,HMGA1,SLC2A1,MYH8,CYP51A1,ERCC2,MYH3,CD44,SC5D,HIST1H1E,NCL,RALB,XRCC1,PFKL,H2AFX,TPR,NCAM1,PYGM,AGPAT2,HIST1H1B,HLA-C,MYL6B,PTPRF,UMPS,FIP1L1,HSD17B7,DES,TRIM27,HSP90B1,POU2F1,XRCC5,SRC,SON,XRCC6	-1.15687	-0.290795	43	178
ANANDAMIDE DEGRADATION	ANANDAMIDE DEGRADATION	0.163045	0.392939	-1	TRH,ADRA2B,ATF2,MYL7,HIST1H2BD,HIST1H2BM,GNAI3,CD44,HIST1H2BN,NCOA6,NMB,SP1,ATF7,HIST1H2BC,JUN,S1PR1,HIST3H2BB,MYL6B,POLR2I,POLR2D,JUND,RAC1,RBBP5,GNA11,SRC	-1.1803	-0.314672	25	112
GLYCOGEN DEGRADATION II	GLYCOGEN DEGRADATION II	0.16653	0.397364	1	PGM5,DSTN,PIN1,HSPA8,HSPH1,IGBP1,PRKAR1A,AGO4,ENO3,OFD1,KPNA1,PNPO,PPP2R1A,ARPC1A,EIF2S1,PPP2R5A,PRDX2,STAU1,IDH2,AGO2,AKR1A1,RANBP1,GARS,CAP2,VCP,PPP1R3A,GYG1,GBAS,IKBKB,TRIM54,USP4,PDP1,CAMK1,HSD17B10,PGD,PSMD4,TRIM55,AARS,GABARAPL2,DNM2,GAPDH,USP19,HSPA9,KIF1B,USP10,VPS39,EIF4A1,ARPC2,DNAJB6,YWHAE,HUWE1,CCT4,PGAM1,HSPA2,PGAM2,DLST,NEDD8,CCT3,NPEPPS,PRKACA,SRP72,CCT8,UBA5,HSPA6,CDK2,ACTR2,ACTN1…	1.11638	0.250601	70	187
SULFITE OXIDATION IV	SULFITE OXIDATION IV	0.173977	0.404809	-1	HIST1H1D,ATP2B1,LAMC1,GNAZ,HIST1H1C,SLC9A1,DSP,MGMT,SLC2A3,JUP,CDH1,ZKSCAN1,HMGA1,SLC2A1,MYH8,ERCC2,MYH3,CD44,HIST1H1E,NCL,RALB,XRCC1,PFKL,H2AFX,TPR,NCAM1,SUOX,PYGM,HIST1H1B,HLA-C,MYL6B,PTPRF,UMPS	-1.14666	-0.288228	33	178
URACIL DEGRADATION II (REDUCTIVE)	URACIL DEGRADATION II (REDUCTIVE)	0.175939	0.404809	-1	HIST1H1D,ATP2B1,LAMC1,GNAZ,HIST1H1C,SLC9A1,DSP,MGMT,SLC2A3,JUP,CDH1,ZKSCAN1,HMGA1,SLC2A1,MYH8,ERCC2,SPRY3,MYH3,CD44,HIST1H1E,NCL,RALB,XRCC1,PFKL,H2AFX,TPR,NCAM1,PYGM,HIST1H1B,HLA-C,MYL6B,PTPRF,UMPS	-1.1452	-0.287398	33	179
THYMINE DEGRADATION	THYMINE DEGRADATION	0.175939	0.404809	-1	HIST1H1D,ATP2B1,LAMC1,GNAZ,HIST1H1C,SLC9A1,DSP,MGMT,SLC2A3,JUP,CDH1,ZKSCAN1,HMGA1,SLC2A1,MYH8,ERCC2,SPRY3,MYH3,CD44,HIST1H1E,NCL,RALB,XRCC1,PFKL,H2AFX,TPR,NCAM1,PYGM,HIST1H1B,HLA-C,MYL6B,PTPRF,UMPS	-1.1452	-0.287398	33	179
TAURINE BIOSYNTHESIS	TAURINE BIOSYNTHESIS	0.17907	0.404809	-1	HIST1H1D,LAMC1,HIST1H1C,DSP,CYP27A1,MGMT,SLC2A3,JUP,CDH1,ZKSCAN1,HMGA1,SLC2A1,MYH8,CYP51A1,MYH3,CD44,FN1,HIST1H1E,RALB,H2AFX,TPR,NCAM1,CYP2S1,PYGM,HIST1H1B,HLA-C,MYL6B,PTPRF,UMPS	-1.15372	-0.297996	29	141
L-CYSTEINE DEGRADATION I	L-CYSTEINE DEGRADATION I	0.17907	0.404809	-1	HIST1H1D,LAMC1,HIST1H1C,DSP,CYP27A1,MGMT,SLC2A3,JUP,CDH1,ZKSCAN1,HMGA1,SLC2A1,MYH8,CYP51A1,MYH3,CD44,FN1,HIST1H1E,RALB,H2AFX,TPR,NCAM1,CYP2S1,PYGM,HIST1H1B,HLA-C,MYL6B,PTPRF,UMPS	-1.15372	-0.297996	29	141
1D-<IMYO</I-INOSITOL HEXAKISPHOSPHATE BIOSYNTHESIS V (FROM INS(1,3,4)P3)	1D-<IMYO</I-INOSITOL HEXAKISPHOSPHATE BIOSYNTHESIS V (FROM INS(1,3,4)P3)	0.181057	0.404809	-1	HIST1H1D,ATP2B1,LAMC1,GNAZ,HIST1H1C,SLC9A1,DSP,MGMT,SLC2A3,JUP,CDH1,ZKSCAN1,HMGA1,SLC2A1,MYH8,ERCC2,MYH3,CD44,HIST1H1E,NCL,RALB,XRCC1,PFKL,H2AFX,TPR,NCAM1,PYGM,HIST1H1B,HLA-C,MYL6B,PTPRF,UMPS,PDCD4,FUT8,DES,TRIM27,HSP90B1,POU2F1,XRCC5,SRC,SON,XRCC6	-1.14117	-0.286262	42	180
TREHALOSE DEGRADATION II (TREHALASE)	TREHALOSE DEGRADATION II (TREHALASE)	0.182977	0.404809	1	PABPC4,DSTN,HSPA8,EEF1A2,MRPS2,HSPH1,TUBA1A,EIF5A,GOT1,NAGK,PPID,GLRX,KPNA1,TUBB4B,HSP90AA1,ACTA2,PABPC1,ATP5C1,PPIL3,RPL4,GDI2,ARPC4,EIF2B5,PCNA,RANBP1,ETF1,PFKP,GARS,VCP,DNAJA1,RPS21,BAD,EIF6,CAMK1,EARS2,GALM,PGD,PSMD4,FKBP1A,HSP90AB1,AARS,DNAJA2,THG1L,HSPA9,PPIA,EIF4A1,UBA52,TXN,PFKFB2,ACTR3,YWHAE,EIF2B2,HMGCS1,ACTA1,PGAM1,HSPA2,PGAM2,NUP37,DLST,ACO2,NPEPPS,PRKACA,UEVLD,CCT8,HSPA6,RAN,CDK2,ACT…	1.10582	0.247516	68	190
<ITRANS, TRANS</I-FARNESYL DIPHOSPHATE BIOSYNTHESIS	<ITRANS, TRANS</I-FARNESYL DIPHOSPHATE BIOSYNTHESIS	0.185442	0.404809	-1	HIST1H1D,LAMC1,GNAZ,HIST1H1C,DSP,MGMT,SLC2A3,JUP,CDH1,ZKSCAN1,HMGA1,SLC2A1,MYH8,ERCC2,MYH3,CD44,FN1,HIST1H1E,RALB,XRCC1,PFKL,H2AFX,TPR,NCAM1,PYGM,HIST1H1B,HLA-C,SSBP4,MYL6B,IDI1,PTPRF,UMPS,PRPF40B,DES,HSPA4L,TRIM27,HSP90B1,POU2F1,XRCC5,SRC,SON,XRCC6,TCF3,SSBP2,PDIA4,YBX3,RPA2,PRKAR2A,TOP2A,PRKCSH,PRPF40A,G6PD,FDPS,RRAS,MYH7,CDH2,CD46,TAF6,TOP1,UNG,SUMO2	-1.13914	-0.286338	61	178
&GAMMA;-LINOLENATE BIOSYNTHESIS II (ANIMALS)	&GAMMA;-LINOLENATE BIOSYNTHESIS II (ANIMALS)	0.186434	0.404809	1	SLC27A4,CLUH,HSPA8,HECW2,EEF2,SIAH1,TUBB6,EEF1A2,HSPH1,CBS,RHOT2,ZNF16,NT5C2,ENO3,RRAGA,ATP5B,TUBB,TUBB4B,CYB5R3,HSP90AA1,SLC27A6,PABPC1,STAU1,TAF9B,EIF4E,WASL,PPP6R2,GALT,IPO7,PPP3CB,PARK2,SLC25A6,GSK3B,PPP6R1,NOVA1,MINOS1,RABAC1,PSMD4,RPSA,HSP90AB1,COPS5,SLC25A5,CCDC8,GAPDH,GPI,TUBGCP3,TRRAP,UPF2,SLC25A4,PGAM1,HSPA2,PGAM2,IFT140,UVRAG,ACO2,NMT1,TUBB2A,PAICS,HSPA6,WDR19,SLC25A3	1.10413	0.249763	61	177
D-<IMYO</I-INOSITOL (1,4,5,6)-TETRAKISPHOSPHATE BIOSYNTHESIS	D-<IMYO</I-INOSITOL (1,4,5,6)-TETRAKISPHOSPHATE BIOSYNTHESIS	0.186447	0.404809	-1	HIST1H1D,ATP2B1,LAMC1,GNAZ,HIST1H1C,SLC9A1,DSP,MGMT,SLC2A3,JUP,CDH1,ZKSCAN1,HMGA1,SLC2A1,MYH8,ERCC2,MYH3,CD44,HIST1H1E,NCL,RALB,XRCC1,PFKL,H2AFX,TPR,NCAM1,PYGM,HIST1H1B,HLA-C,MYL6B,PTPRF,UMPS,FUT8,DES,TRIM27,HSP90B1,POU2F1,XRCC5,SRC,SON,XRCC6	-1.13713	-0.284975	41	181
D-<IMYO</I-INOSITOL (1,3,4)-TRISPHOSPHATE BIOSYNTHESIS	D-<IMYO</I-INOSITOL (1,3,4)-TRISPHOSPHATE BIOSYNTHESIS	0.193469	0.416305	-1	NRAS,KRAS,MYL7,SLC9A1,IQGAP2,FGF13,MYO1C,DLG1,IQGAP1,MOV10,PYGL,SMN1,HRAS,ENO1,TPR,MARCKS,CACNA1C,MYO6,PYGM,CAMK2B,KRT18,PPP1R1B,MYL6B,ATP2B4,KCNQ1,RCCD1,FKBP1B,TRIM27,RAC1,ADNP2,CAV1,KSR1,KHSRP,HMOX2,INPP5K	-1.14184	-0.29271	35	150
2-OXOISOVALERATE DECARBOXYLATION TO ISOBUTANOYL-COA	2-OXOISOVALERATE DECARBOXYLATION TO ISOBUTANOYL-COA	0.204555	0.432136	1	NTN1,CLUH,HSPA8,EEF2,NME2,TPT1,EEF1A2,HSPH1,ISYNA1,TARS,PRKAR1A,GOT1,PTEN,CFL1,SURF1,AGO4,ENO3,PDK2,PEBP1,RPS18,RPL27,EIF2S2,VDAC1,OTUB1,SPATA20,TAF9B,YBX1,OGDHL,NFKB1,MAT2A,IPO4,PARK2,ACTN2,GART,SLC25A6,NME1,HSPE1,RPL15,PDP1,COQ10B,RPL7,EARS2,USP16,HSD17B10,EEF1G,AHCY,PSMD4,HSP90AB1,CUL3,HK1,COQ5,NOB1,MAX,GAPDH,IDE,UCHL3,ATP5A1,RPL30,HUWE1,SLC25A4,PGAM1,HSPA2,PGAM2,UBA1,DLST,NEDD8,NPEPPS	1.09028	0.241982	67	204
ARGININE BIOSYNTHESIS IV	ARGININE BIOSYNTHESIS IV	0.205212	0.432136	1	KHDRBS3,HSPA8,GLUD2,HSPH1,LAMP1,ASCC2,MCC,C11ORF68,ENO3,TRAF6,DOHH,KPNA1,CEP135,ATP5B,TUBB,PPP2R1A,RPL36,LSM1,ARAF,YWHAB,OTUB1,ATP5C1,STAU1,RPL11,MAPK1,OGDHL,EIF4E,NFKB1,ILK,GALT,DMWD,DNAJA1,FNTA,ACTN2,ASS1,AKTIP,RHOC,USP4,HMGA2,PPP5C,PFDN2,EIF6,HSD17B10,NUDT3,PSMD4,HSP90AB1,CUL3,MRPL17,DNAJA2,SLC35F6,SLC25A5,QARS,NSFL1C,GAPDH,USP10,GPI,HUWE1,HSPA2,CDK5,FH,NEDD8,ACO2,CSNK1E,PSMA6,HSPA6,EIF1B,GLUD…	1.09398	0.246112	69	185
GLUTATHIONE REDOX REACTIONS II	GLUTATHIONE REDOX REACTIONS II	0.206206	0.432136	-1	HIST1H1D,ATP2B1,LAMC1,GNAZ,HIST1H1C,SLC9A1,DSP,MGMT,SLC2A3,JUP,CDH1,ZKSCAN1,HMGA1,SLC2A1,MYH8,ERCC2,MYH3,CD44,HIST1H1E,NCL,RALB,XRCC1,PFKL,H2AFX,TPR,JUN,NCAM1,PYGM,HIST1H1B,HLA-C,MYL6B,PTPRF,UMPS,DES,TRIM27,HSP90B1,POU2F1,XRCC5,SRC,SON,XRCC6,MCM2	-1.12589	-0.282158	42	181
SPERMINE BIOSYNTHESIS	SPERMINE BIOSYNTHESIS	0.224836	0.454465	-1	HIST1H1D,LAMC1,PRELP,STXBP2,HIST1H1C,DSP,MGMT,SLC2A3,JUP,CDH1,BMP7,ZKSCAN1,HMGA1,SLC2A1,MYH8,ERCC2,MYH3,CD44,HIST1H1E,RALB,PFKL,H2AFX,TPR,MYZAP,NCAM1,PYGM,HIST1H1B,PPP1R13L,HLA-C,MYL6B,PTPRF,UMPS,DES,TRIM27,MAPK6,HSP90B1,POU2F1,XRCC5,SRC	-1.11596	-0.281178	39	175
ACYL-COA HYDROLYSIS	ACYL-COA HYDROLYSIS	0.225068	0.454465	1	PIK3R1,FGFR1,ADH5,HSPA8,EEF2,TPT1,DLC1,PRKAR1A,ATXN1,RNH1,RRAGC,TSC2,ENO3,RRAGA,TRAF6,ARRB1,APEH,DMD,HARS,HSP90AA1,CDK4,CKB,UBL4A,CASP9,RAF1,PABPC1,LAMTOR3,OTUB1,PEPD,FOXO1,APPL1,RPTOR,AKT1S1,ILK,LAMTOR1,PCNA	1.08904	0.24995	36	160
OLEATE BIOSYNTHESIS II (ANIMALS)	OLEATE BIOSYNTHESIS II (ANIMALS)	0.227938	0.454465	1	RPS4Y1,PABPC4,FGFR1,CLUH,ADH5,HSPA8,EEF2,TPT1,TUBB6,HSPH1,RPL37,TUBA1A,PRKAR1A,RNH1,ENO3,RPLP1,APEH,TUBB,DMD,HARS,RPL36,TUBB4B,CDK4,CKB,RPL23,UBL4A,ATP2A3,PABPC1,PEPD,MAPK1,RPL4,AKR1A1,PCNA,VCP,IPO4,DNAJA1	1.08327	0.245847	36	174
SPHINGOMYELIN METABOLISM	SPHINGOMYELIN METABOLISM	0.22809	0.454465	1	CRMP1,BRAF,DNM1L,FGFR1,DNAJB5,ADH5,HSPA8,EEF2,MTHFR,TPT1,AKR1B1,HSPH1,PRKAR1A,ATXN1,RNH1,FNTB,ENO3,APEH,DMD,HARS,CDK4,CKB,GSPT1,UBL4A,SMPD1,PABPC1,PEPD	1.08828	0.25004	27	157
GDP-L-FUCOSE BIOSYNTHESIS II (FROM L-FUCOSE)	GDP-L-FUCOSE BIOSYNTHESIS II (FROM L-FUCOSE)	0.22985	0.454465	-1	HIST1H1D,ATP2B1,LAMC1,GNAZ,HIST1H1C,SLC9A1,DSP,MGMT,SLC2A3,JUP,CDH1,ZKSCAN1,HMGA1,SLC2A1,MYH8,ERCC2,MYH3,CD44,HIST1H1E,NCL,RALB,XRCC1,PFKL,H2AFX,TPR,NCAM1,PYGM,HIST1H1B,HLA-C,MYL6B,PTPRF,UMPS	-1.11168	-0.278988	32	179
L-DOPACHROME BIOSYNTHESIS	L-DOPACHROME BIOSYNTHESIS	0.23034	0.454465	-1	HIST1H1D,ATP2B1,LAMC1,GNAZ,HIST1H1C,SLC9A1,DSP,MGMT,SLC2A3,JUP,CDH1,ZKSCAN1,HMGA1,SLC2A1,MYH8,ERCC2,MYH3,CD44,HIST1H1E,NCL,RALB,XRCC1,PFKL,H2AFX,TPR,NCAM1,PYGM,HIST1H1B,HLA-C,MYL6B,PTPRF,UMPS,DES,TRIM27,HSP90B1,POU2F1,XRCC5,SRC,SON,XRCC6,TCF3,ERLEC1,PDIA4,YBX3,RPA2,PRKAR2A,TOP2A,EIF2AK2,PRKCSH,G6PD,FDPS,RRAS,MYH7,CDH2,CD46,TOP1,UNG	-1.11227	-0.279012	57	180
D-GLUCURONATE DEGRADATION I	D-GLUCURONATE DEGRADATION I	0.231136	0.454465	-1	HIST1H1D,ATP2B1,LAMC1,GNAZ,HIST1H1C,SLC9A1,DSP,MGMT,SLC2A3,JUP,CDH1,ZKSCAN1,HMGA1,SLC2A1,MYH8,ERCC2,MYH3,CD44,HIST1H1E,NCL,RALB,XRCC1,PFKL,H2AFX,TPR,JUN,NCAM1,PYGM,HIST1H1B,HLA-C,MYL6B,PTPRF,UMPS	-1.11078	-0.278371	33	181
1D-<IMYO</I-INOSITOL HEXAKISPHOSPHATE BIOSYNTHESIS II (MAMMALIAN)	1D-<IMYO</I-INOSITOL HEXAKISPHOSPHATE BIOSYNTHESIS II (MAMMALIAN)	0.233741	0.454465	-1	NRAS,KRAS,MYL7,SLC9A1,IQGAP2,FGF13,MYO1C,DLG1,IQGAP1,MOV10,PYGL,SMN1,HRAS,TPR,MARCKS,CACNA1C,MYO6,PYGM,CAMK2B,KRT18,PPP1R1B,MYL6B,ATP2B4,KCNQ1,RCCD1,FKBP1B,TRIM27,RAC1,ADNP2,CAV1,KSR1,KHSRP,HMOX2,INPP5K	-1.11442	-0.28568	34	150
DTMP <IDE NOVO</I BIOSYNTHESIS	DTMP <IDE NOVO</I BIOSYNTHESIS	0.233833	0.454465	1	MAP1LC3B,RABGAP1L,ADAM19,HSPA8,EEF2,GLUD2,EEF1A2,HSPH1,ABCF3,GRK6,GOT1,DHFR,NAP1L4,NAP1L1,KIF21A,KLHDC4,KPNA1,LSM1,ASF1A,OTUB1,PTRHD1,STRADA,FAM96B,KIAA0907,PCNA,CNBP,STRIP1,ENOX2,CAPZA2,HSPE1,UBR4,RNF10,ADAL,TIMM23,HERC4,PSMD4,FKBP1A,HSP90AB1,RPL8,PRUNE,TYMS,HSPA9,USP10,CS,YARS,NAB1,HARS2,HUWE1,UPF2,ZBTB8OS,HSPA2,NEDD8,NPEPPS,DECR1,UBA5,HSPA6,EIF1B	1.08269	0.246045	57	171
ESTROGEN BIOSYNTHESIS	ESTROGEN BIOSYNTHESIS	0.240964	0.464578	1	RPS4Y1,CYP2J2,DSTN,CFL2,BRAF,HSPA8,DLC1,CORO2B,PTEN,CFL1,MCC,BUB1,SEPT5,EIF2B3,RPL36,RPL27,CYB5R3,HSP90AA1,VDAC1,SMAD2,EIF2B4,YWHAB,RPL10A,CORO6,DBNL,RPS17,EIF2B5,RPL3,RPS8,CNBP,ARFGEF1	1.08345	0.252482	31	145
ACYL CARRIER PROTEIN METABOLISM	ACYL CARRIER PROTEIN METABOLISM	0.247909	0.474174	-1	HIST1H1D,LAMC1,GNAZ,HIST1H1C,DSP,MGMT,SLC2A3,JUP,CDH1,ZKSCAN1,HMGA1,SLC2A1,MYH8,ERCC2,MYH3,CD44,HIST1H1E,NCL,MOV10,RALB,XRCC1,PFKL,H2AFX,TPR,JUN,NCAM1,PYGM,HIST1H1B,HLA-C,MYL6B,PTPRF,UMPS,DES,TRIM27,HSP90B1,POU2F1,XRCC5,SRC,SON,XRCC6,TCF3,RAE1,PDIA4,YBX3,RPA2,PRKAR2A,TOP2A,ACTB,EIF2AK2,PRKCSH,G6PD,FDPS,RRAS,MYH7,CDH2,CD46,TOP1,UNG	-1.10071	-0.276233	58	179
PUTRESCINE BIOSYNTHESIS III	PUTRESCINE BIOSYNTHESIS III	0.254849	0.482733	-1	HIST1H1D,LAMC1,GNAZ,HIST1H1C,DSP,MGMT,SLC2A3,JUP,CDH1,ZKSCAN1,HMGA1,TMOD1,SLC2A1,MYH8,ERCC2,MYH3,CD44,STX17,HIST1H1E,RALB,XRCC1,PFKL,H2AFX,TPR,NCAM1,PYGM,HIST1H1B,HLA-C,MYL6B,PTPRF,UMPS,DES,HSPA4L,TRIM27,HSP90B1,POU2F1,XRCC5,SRC,SON,XRCC6	-1.09705	-0.27665	40	174
NORADRENALINE AND ADRENALINE DEGRADATION	NORADRENALINE AND ADRENALINE DEGRADATION	0.256389	0.482733	1	MAP1LC3B,TNPO1,DNAJB5,CLUH,ADH5,HSPA8,MYH11,EEF2,TUBB6,EEF1A2,HSPH1,TUBA1A,CBS,ACSS2,PRKAR1A,ENO3,TPMT,DRG1,TUBB,PPP2R1A,TUBB4B,LSM1,ASF1A,PRDX2,PPP6R2,CNBP,MAT2A,VCP,IPO4,DNAJA1,ASS1,SLC25A6,HSPE1,PPP6R1,SMAD3,SRP54,EIF6,HSD17B10,PGD,PSMD4,MYH10,RPAIN,RUVBL2,GABARAPL2,DNAJA2,SLC25A5,EIF4A2,HSPA9,USP10,HNRNPK,EIF4A1,PLAA,FDXR,YWHAE,HUWE1,SLC25A4,PGAM1,HSPA2,PGAM2,RPF2,NEDD8,NPEPPS,TUBB2A,CSNK1E,C…	1.06848	0.239069	67	191
DIPHTHAMIDE BIOSYNTHESIS	DIPHTHAMIDE BIOSYNTHESIS	0.260361	0.48297	-1	HIST1H1D,ATP2B1,LAMC1,GNAZ,HIST1H1C,SLC9A1,DSP,MGMT,SLC2A3,JUP,CDH1,ZKSCAN1,HMGA1,SLC2A1,MYH8,ERCC2,MYH3,CD44,HIST1H1E,NCL,RALB,XRCC1,PFKL,H2AFX,TPR,NCAM1,PYGM,HIST1H1B,HLA-C,MYL6B,PTPRF,UMPS	-1.09345	-0.274291	32	180
NAD BIOSYNTHESIS III	NAD BIOSYNTHESIS III	0.260523	0.48297	-1	HIST1H1D,LAMC1,GNAZ,HIST1H1C,SLC9A1,DSP,MGMT,SLC2A3,JUP,CDH1,ZKSCAN1,HMGA1,SLC2A1,MYH8,ERCC2,MYH3,CD44,HIST1H1E,NCL,RALB,XRCC1,PFKL,H2AFX,TPR,NCAM1,PYGM,HIST1H1B,HLA-C,MYL6B,PTPRF,UMPS,DES,TRIM27,HSP90B1,POU2F1,XRCC5,SRC,SON,XRCC6	-1.09352	-0.274429	39	179
L-CARNITINE BIOSYNTHESIS	L-CARNITINE BIOSYNTHESIS	0.267003	0.488614	-1	HIST1H1D,LAMC1,HIST1H1C,DSP,MGMT,SLC2A3,JUP,CDH1,ZKSCAN1,HMGA1,SLC2A1,MYH8,ERCC2,MYH3,CD44,ITPR3,HIST1H1E,RALB,PFKL,H2AFX,TPR,JUN,NCAM1,MAD2L2,PYGM,HIST1H1B,SDHAF4,HLA-C,MYL6B,RBL2,PTPRF,UMPS,TMLHE,DES,TRIM27,HSP90B1,POU2F1,POLR3F,XRCC5,SRC,SON,XRCC6,HSPB3	-1.09047	-0.273544	43	180
NAD PHOSPHORYLATION AND DEPHOSPHORYLATION	NAD PHOSPHORYLATION AND DEPHOSPHORYLATION	0.267622	0.488614	-1	HIST1H1D,LAMC1,GNAZ,HIST1H1C,DSP,MGMT,SLC2A3,JUP,CDH1,ZKSCAN1,HMGA1,SLC2A1,MYH8,ERCC2,MYH3,CD44,HIST1H1E,NCL,MOV10,RALB,XRCC1,PFKL,H2AFX,TPR,NCAM1,PYGM,HIST1H1B,HLA-C,MYL6B,PTPRF,UMPS,DES,TRIM27,HSP90B1,POU2F1,XRCC5,SRC,SDCBP,SON,XRCC6	-1.09215	-0.273672	40	182
COENZYME A BIOSYNTHESIS	COENZYME A BIOSYNTHESIS	0.276457	0.499922	-1	HIST1H1D,ATP2B1,LAMC1,GNAZ,HIST1H1C,SLC9A1,DSP,MGMT,SLC2A3,JUP,CDH1,ZKSCAN1,HMGA1,SLC2A1,MYH8,ERCC2,MYH3,CD44,HIST1H1E,NCL,RALB,XRCC1,PFKL,H2AFX,TPR,NCAM1,PYGM,HIST1H1B,HLA-C,MYL6B,PTPRF,UMPS	-1.08474	-0.272228	32	179
GLYCINE CLEAVAGE	GLYCINE CLEAVAGE	0.277965	0.499922	1	NTN1,CLUH,HSPA8,EEF2,NME2,TPT1,EEF1A2,HSPH1,ISYNA1,TARS,CBS,PRKAR1A,GOT1,CFL1,SURF1,ENO3,PDK2,PEBP1,GLRX,RPS18,RPL27,EIF2S2,VDAC1,PRDX2,OTUB1,ATP5C1,TAF9B,OGDHL,IDH2,MAT2A,IPO4,DNAJA1,GART,SLC25A6,NME1,HSPE1,RPL15,PDP1,PPP5C,RPL7,GDI1,CAMK1,EARS2,HSD17B10,EEF1G,AHCY,PSMD4,RPSA,HSP90AB1,CUL2,HK1,NOB1,UQCRC1,GAPDH,IDE,UCHL3,HSPA9,ATP5A1,RPL30,HUWE1,SLC25A4,PGAM1,HSPA2,PGAM2,UBA1,DLST,NEDD8,NPEPPS	1.0613	0.234906	68	208
METHIONINE SALVAGE II (MAMMALIA)	METHIONINE SALVAGE II (MAMMALIA)	0.2819	0.500771	-1	HIST1H1D,LAMC1,GNAZ,HIST1H1C,DSP,MGMT,SLC2A3,JUP,CDH1,ZKSCAN1,HMGA1,SLC2A1,MYH8,ERCC2,MYH3,CD44,HIST1H1E,MOV10,RALB,XRCC1,PFKL,H2AFX,TPR,NCAM1,PYGM,HIST1H1B,HLA-C,MYL6B,RBL2,PTPRF,UMPS,DES,TRIM27,HSP90B1,POU2F1,XRCC5,SRC,SON,XRCC6,TCF3,DYNLL1,PDIA4,YBX3,RPA2,PRKAR2A,TOP2A,PRKCSH,G6PD,FDPS,RRAS,MYH7,CDH2,CD46,TOP1,UNG	-1.08297	-0.2738	55	170
FOLATE POLYGLUTAMYLATION	FOLATE POLYGLUTAMYLATION	0.283359	0.500771	1	MAP1LC3B,RABGAP1L,ADAM19,HSPA8,HECW2,EEF2,GLUD2,EEF1A2,HSPH1,ABCF3,GRK6,GOT1,NAP1L4,NAP1L1,KIF21A,KLHDC4,KPNA1,LSM1,ASF1A,OTUB1,PTRHD1,MAPK1,STRADA,KIAA0907,ILK,PCNA,STRIP1,ENOX2,UBR4,RNF10,ADAL,HGS,HERC4,PSMD4,HSP90AB1,RPL8,PRUNE,MAX,HSPA9,USP10,CS,YARS,NAB1,HARS2,HUWE1,ZBTB8OS	1.05892	0.240326	46	172
GLUTAMATE REMOVAL FROM FOLATES	GLUTAMATE REMOVAL FROM FOLATES	0.284671	0.500771	-1	HIST1H1D,LAMC1,GNAZ,HIST1H1C,SLC9A1,DSP,MGMT,SLC2A3,JUP,CDH1,ZKSCAN1,HMGA1,SLC2A1,MYH8,ERCC2,MYH3,CD44,HIST1H1E,NCL,RALB,XRCC1,PFKL,H2AFX,TPR,UGDH,NCAM1,PYGM,HIST1H1B,HLA-C,MYL6B,PTPRF,UMPS,DES,TRIM27,HSP90B1,POU2F1,XRCC5,SRC,ATP6V1A,SON,XRCC6,MCM2,TCF3,TGOLN2,PDIA4,YBX3,RPA2,PRKAR2A,TOP2A,EIF2AK2,PRKCSH,G6PD,FDPS,RRAS,MYH7,CDH2,CD46,TOP1,UNG	-1.08184	-0.27138	59	180
TRYPTOPHAN DEGRADATION TO 2-AMINO-3-CARBOXYMUCONATE SEMIALDEHYDE	TRYPTOPHAN DEGRADATION TO 2-AMINO-3-CARBOXYMUCONATE SEMIALDEHYDE	0.289276	0.502728	1	PIN1,FGFR1,NTMT1,ADH5,HSPA8,EEF2,TPT1,TUBB6,EEF1A2,HSPH1,TUBA1A,ZFYVE26,PRKAR1A,RNH1,APEH,ATP5B,TUBB,DMD,HARS,TUBB4B,LSM1,CDK4,CKB,ARHGDIA,UBL4A,ACTA2,PABPC1,PEPD,VBP1,EIF4E,PCNA,PFKP,VCP,DNAJA1,DVL2,SLC25A6,SEC24A,SAR1B,PFDN6,HSP90AB1,PSMA1,RUVBL2,HK1,DNAJA2,ATXN3,HSPA9,GALE,UBA52,TXN,ATP5A1,EIF2B2,SLC25A4,ACTA1,HSPA2,MOB1A,REL,PRKACA,TUBB2A,CSNK1E,HSPA6	1.06011	0.24059	60	174
HEME DEGRADATION	HEME DEGRADATION	0.289955	0.502728	-1	HIST1H1D,ATP2B1,LAMC1,GNAZ,HIST1H1C,SLC9A1,DSP,MGMT,SLC2A3,JUP,CDH1,ZKSCAN1,HMGA1,SLC2A1,MYH8,ERCC2,MYH3,CD44,HIST1H1E,NCL,RALB,XRCC1,PFKL,H2AFX,TPR,NCAM1,PYGM,HIST1H1B,HLA-C,MYL6B,PTPRF,UMPS,DES,TRIM27,HSP90B1,POU2F1,XRCC5,SRC,SON,XRCC6,TCF3,PDIA4,YBX3,RPA2,PRKAR2A,TOP2A,THBS3,PCYOX1,EIF2AK2,PRKCSH,G6PD,FDPS,TBX20,RRAS,MYH7,CDH2,CD46,TOP1,UNG,SUMO2	-1.07785	-0.26978	60	185
<IN</I-ACETYLGLUCOSAMINE DEGRADATION I	<IN</I-ACETYLGLUCOSAMINE DEGRADATION I	0.292534	0.503577	-1	HIST1H1D,LAMC1,GNAZ,HIST1H1C,DSP,MGMT,SLC2A3,JUP,CDH1,ZKSCAN1,HMGA1,SLC2A1,MYH8,ERCC2,MYH3,CD44,HIST1H1E,NCL,MOV10,RALB,XRCC1,PFKL,H2AFX,TPR,NCAM1,PYGM,HIST1H1B,HLA-C,STK11,MYL6B,PTPRF,UMPS,DES,TRIM27,HSP90B1,POU2F1,XRCC5,EWSR1,SRC,SON,XRCC6,TCF3,PDIA4,YBX3,RPA2,PRKAR2A,TOP2A,THBS3,PRKCSH,G6PD,FDPS,RRAS,MYH7,PGK1,CDH2,CD46,TOP1,UNG	-1.07746	-0.270019	58	181
TRIACYLGLYCEROL BIOSYNTHESIS	TRIACYLGLYCEROL BIOSYNTHESIS	0.294967	0.504163	1	RPS4Y1,PABPC4,SLC27A4,HSPA8,TUBB6,EEF1A2,HSPH1,ABCF3,TUBA1A,STRN4,ENO3,TUBB,TUBB4B,HSP90AA1,APLP1,YWHAB,SLC27A6,ATP2A3,PABPC1,BAG6,SPNS1,RPL4,CNDP2,ANKRD28,RPL3,CAP2,ARFGEF1,MAT2A,VCP,IPO4,RPL13,HMGA2,RPL7,CAMK1,RPSA,HSP90AB1,RPS7,PSMA7,ABCD3	1.05633	0.240343	39	169
2-AMINO-3-CARBOXYMUCONATE SEMIALDEHYDE DEGRADATION TO GLUTARYL-COA	2-AMINO-3-CARBOXYMUCONATE SEMIALDEHYDE DEGRADATION TO GLUTARYL-COA	0.300168	0.507121	-1	TRH,ADRA2B,GNAQ,GNAI3,GNB1,ALDH6A1,NMB,TFB2M,S1PR1	-1.09407	-0.320247	9	62
EICOSAPENTAENOATE BIOSYNTHESIS II (METAZOA)	EICOSAPENTAENOATE BIOSYNTHESIS II (METAZOA)	0.30238	0.507121	1	SLC27A4,CLUH,HSPA8,HECW2,SIAH1,TUBB6,EEF1A2,HSPH1,CBS,DLC1,RHOT2,ZNF16,ATXN1,NT5C2,RRAGA,TUBB,TUBB4B,CYB5R3,SLC27A6,OTUB1,STAU1,TAF9B,WASL,PPP6R2,PCNA,IPO7,PPP3CB,PARK2,GSK3B,PPP6R1,MINOS1,RABAC1,PSMD4,RPSA,COPS5,CCDC8,GAPDH,GPI,TUBGCP3,ATP5A1,TRRAP,UPF2,ZNF277,CHMP4B,HSPA2,IFT140,NEDD8,UVRAG,ACO2,NMT1,TUBB2A,CRYAB,PAICS,HSPA6,WDR19,CDK2,SLC25A3	1.05343	0.239683	57	169
URIDINE-5'-PHOSPHATE BIOSYNTHESIS	URIDINE-5'-PHOSPHATE BIOSYNTHESIS	0.30301	0.507121	-1	MYH6,HIST1H1D,LAMC1,HIST1H1C,DSP,MGMT,SLC2A3,JUP,CDH1,ZKSCAN1,HMGA1,SLC2A1,MYH8,MYH3,CD44,HIST1H1E,MOV10,RALB,H2AFX,TPR,JUN,NCAM1,PYGM,HIST1H1B,HLA-C,MYL6B,RBL2,PTPRF,UMPS,A2M,TMED10,ACADS,DES,TRIM27,HSP90B1,POU2F1,XRCC5,SRC,XRCC6,TCF3,CDC5L,PDIA4,YBX3,SEPHS1,RPA2,PSEN1,PRKAR2A,TOP2A,KIF4A,PRKCSH,G6PD,FDPS,RRAS,MYH7,NUP98,CD46,TOP1,UNG	-1.07266	-0.270498	58	174
<IS</I-METHYL-5-THIO-&ALPHA;-D-RIBOSE 1-PHOSPHATE DEGRADATION	<IS</I-METHYL-5-THIO-&ALPHA;-D-RIBOSE 1-PHOSPHATE DEGRADATION	0.305159	0.507196	-1	HIST1H1D,LAMC1,HIST1H1C,DSP,MGMT,SLC2A3,JUP,CDH1,ZKSCAN1,SLC2A1,MYH8,MYH3,CD44,HIST1H1E,RALB,MMP14,APAF1,H2AFX,TPR,JUN,ATF7IP,NCAM1,PYGM,HIST1H1B,HLA-C,MYL6B,PTPRF,UMPS,HSPA4L,TRIM27,HSP90B1,POU2F1,XRCC5,SRC,SDCBP,XRCC6,TCF3,PDIA4,YBX3,RPA2,PRKAR2A,TOP2A,PRKCSH,ADI1,G6PD,FDPS,RRAS,MYH7,CD46,TOP1,UNG,SUMO2	-1.07036	-0.269049	52	178
ZYMOSTEROL BIOSYNTHESIS	ZYMOSTEROL BIOSYNTHESIS	0.318395	0.525569	-1	LAMC1,SLC2A3,CDH1,SLC2A1,MYH8,CYP51A1,MYH3,SC5D,HIST1H1E,MOV10,RALB,HDAC1,TMEM30A,TPR,JUN,CBX5,NCAM1,MECP2,PYGM,HLA-C,CTNNB1,PTPRF,UMPS,CBX3,LBR,TMED10,HSD17B7,PRPF40B,SIN3A,TUBB2B,TM7SF2,XRCC5,FNBP4,SRC,ATP6V1A,XRCC6,SUZ12,MCM2,TCF3,PDIA4,RNF169,CLK3,TOP2A,ACTB,PPP2R1B,PRPF40A,MCM6,TMED4,G6PD,RRAS,MYH7,TOP1,UNG,SUMO2,NSDHL,MYH1	-1.06457	-0.26846	56	174
GDP-GLUCOSE BIOSYNTHESIS	GDP-GLUCOSE BIOSYNTHESIS	0.322368	0.526946	1	PGM5,PABPC4,TNPO1,DSTN,HSPA8,EEF1A2,HSPH1,UGP2,TUBA1A,EIF5A,ENO3,KPNA1,PNPO,PPP2R1A,TUBB4B,HSP90AA1,ARPC1A,ACTA2,AKR1A1,PCNA,RANBP1,PFKP,GARS,CAP2,PMM1,VCP,IPO4,RARS2,UBE3C,BAD,USP4,PDP1,CAMK1,EARS2,PGD,PSMD4,HSP90AB1,CUL2,AARS,THG1L,EIF4A2,HSPA9,PPIA,KIF1B,USP10,EIF4A1,ARPC2,UBA52,PFKFB2,DNAJB6,YWHAE,CCT4,ACTA1,HSPA2,PPA1,NUP37,DLST,CCT3,NPEPPS,PRKACA,TUBB2A,CCT8,UBA5,HSPA6	1.04164	0.233151	64	190
MOLYBDENUM COFACTOR BIOSYNTHESIS	MOLYBDENUM COFACTOR BIOSYNTHESIS	0.323602	0.526946	1	TAF5L,HSPA8,MRPS2,CTSL,ABCF3,C17ORF89,MOCS2,PRKAR1A,MAPKAPK2,NAP1L4,RB1CC1,NAP1L1,TAF6L,TADA3,TRAF6,PPP2R1A,EIF2S2,IRAK1,IPO9,ATP2A3,USP5,CLPX,TAF9B,TADA1,SUPT7L,DYNLT1,RPTOR,PICK1,RIOK3,CTSD,TAB2,HSPE1,BAZ1A,KPNA4,MRRF,ATAD3A,UBE2K,GABARAPL2,TADA2B,MAX,MOCS3,GAPDH,POLE2,USP13,FYN,GALE,UBA52,UFM1,TXN,TUFM,TRRAP,TAF12,POLA1,ATP2A2,MAPK14,CCT4,HSPA2,CCT3,ACO2,CCT8,UBA5,HSPA6,MAPK9	1.04147	0.233112	63	190
INOSITOL PYROPHOSPHATES BIOSYNTHESIS	INOSITOL PYROPHOSPHATES BIOSYNTHESIS	0.328566	0.530168	-1	HIST1H1D,BAIAP2L1,LAMC1,HIST1H1C,DSP,MGMT,SLC2A3,JUP,CDH1,ZKSCAN1,HMGA1,SLC2A1,MYH8,ERCC2,MYH3,CD44,PHF21A,HIST1H1E,RALB,PFKL,H2AFX,TPR,NCAM1,PYGM,HIST1H1B,HLA-C,MYL6B,PTPRF,UMPS,GTPBP6,DES,TRIM27,HSP90B1,POU2F1,XRCC5,SRC,SON,XRCC6,TCF3,UBXN4,PDIA4,YBX3,RPA2,PRKAR2A,TOP2A,PRKCSH,TP53,G6PD,FDPS,RRAS,MYH7,CD46,TOP1,UNG	-1.05892	-0.266543	54	177
PHENYLALANINE DEGRADATION I (AEROBIC)	PHENYLALANINE DEGRADATION I (AEROBIC)	0.32998	0.530168	-1	LAMC1,ZZZ3,SLC2A3,EPB41,KLF13,SLC2A1,FAM91A1,MYH3,CENPK,HIST1H1E,NCL,RALB,BRD7,CACNA1C,PYGM,HLA-C,DPPA4,PML,CUL4B,RBL2,PTPRF,UMPS,ZDHHC13,THOC1,MAP7,BRPF1,SMARCD1,PHF14,RUNX1T1,SNW1,SEC62,CERS2,GTF3C3,CDC5L,AATF,C1D,EHMT1,TOP2A,UBA2,ILF3,EP300,PPA2,SMARCA2,G6PD,RRAS,TKT,BRF1,CEBPZ,TOP1,CHD4	-1.05999	-0.268714	50	164
NICOTINE DEGRADATION III	NICOTINE DEGRADATION III	0.336685	0.534239	-1	ADAMTSL4,ATF2,BRD4,PPL,MLLT4,CYP27A1,ADD3,HSPB2,CYP51A1,RAP2C,IQGAP1,GTF2I,RAVER1,JUN,NUP35,UGDH,CYP2S1,ACAD8,A2M,CYB5A,RECQL,PGRMC1,JUND,VAMP7,LONP1,CD36,RAP2B,ZMPSTE24,VRK1	-1.06047	-0.278879	29	124
GLUCOSE AND GLUCOSE-1-PHOSPHATE DEGRADATION	GLUCOSE AND GLUCOSE-1-PHOSPHATE DEGRADATION	0.336947	0.534239	1	PGM5,HSPA8,EEF2,NME2,TPT1,AKR1B1,ANXA6,HSPH1,ISYNA1,EIF5A,WDR1,ENO3,EEF1D,EIF3B,PNPO,ATP5B,PPP2R1A,HSP90AA1,ARPC1A,ARHGDIA,YWHAB,GDI2,AKR1A1,PCNA,RANBP1,GARS,CAP2,VCP,RPS21,NME1,BAD,HSPE1,USP4,PDP1,GDI1,CAMK1,EARS2,HSD17B10,PGD,PSMD4,FKBP1A,HSP90AB1,AARS,PSMA7,THG1L,GAPDH,UCHL3,CYC1,HSPA9,KIF1B,USP10,ARPC2,UBA52,TXN,PFKFB2,ATP5A1,MAPRE3,DNAJB6,DNASE2,YWHAE,PGAM1,HSPA2,PGAM2,NUP37,DLST,CCT3,PRKACA…	1.036	0.231376	71	196
HISTIDINE DEGRADATION VI	HISTIDINE DEGRADATION VI	0.349946	0.547642	-1	NRAS,ATF2,KRAS,NTHL1,AP2M1,AP2A2,MDC1,LYN,GTF2I,HRAS,JUN,NUP35,HIST3H2BB,TP53BP1,DPPA4,CUL4B,STAT6,NUP54,SSRP1,SMC1A,RPS6KA5,FGF2,STAG2,RAC1,SP3,AP2B1,BAIAP2,SRC,STK3,GLYR1,CAV1,KSR1,MCM2,RAE1,XPC,PRDX4,HIST2H2AB	-1.05159	-0.270284	37	146
HISTIDINE DEGRADATION III	HISTIDINE DEGRADATION III	0.349946	0.547642	-1	NRAS,ATF2,KRAS,NTHL1,AP2M1,AP2A2,MDC1,LYN,GTF2I,HRAS,JUN,NUP35,HIST3H2BB,TP53BP1,DPPA4,CUL4B,STAT6,NUP54,SSRP1,SMC1A,RPS6KA5,FGF2,STAG2,RAC1,SP3,AP2B1,BAIAP2,SRC,STK3,GLYR1,CAV1,KSR1,MCM2,RAE1,XPC,PRDX4,HIST2H2AB	-1.05159	-0.270284	37	146
STEARATE BIOSYNTHESIS I (ANIMALS)	STEARATE BIOSYNTHESIS I (ANIMALS)	0.352321	0.547803	1	SLC27A4,CLUH,HSPA8,HECW2,SIAH1,TUBB6,EEF1A2,HSPH1,CBS,DLC1,RHOT2,ZNF16,ATXN1,NT5C2,RRAGA,TUBB,TUBB4B,CYB5R3,SLC27A6,OTUB1,STAU1,TAF9B,WASL,PPP6R2,IPO7,PPP3CB,PARK2,GSK3B,PPP6R1,MINOS1,RABAC1,PSMD4,RPSA,COPS5,SLC25A5,CCDC8,GAPDH,GPI,TUBGCP3,ATP5A1,TRRAP,UPF2,ZNF277,HSPA2,IFT140,NEDD8,UVRAG,ACO2,NMT1,TUBB2A,CRYAB,PAICS,HSPA6,WDR19,CDK2,SLC25A3	1.03432	0.235335	56	169
FATTY ACID BIOSYNTHESIS INITIATION II	FATTY ACID BIOSYNTHESIS INITIATION II	0.364772	0.563525	-1	MAT1A,CHEK2,ERCC2,CENPK,PARP1,MDC1,NUP85,WHSC1,NOD1,H2AFX,TPR,KDM4B,NUP35,NUP62,TP53BP1,COX7C,CENPC,NSL1,CTNNB1,CDCA8,GTF2B,CUL4B,NUP153,NUP54,BIRC5,OXSM,SMC1A,TUBB2B,PDS5A,STAG2,XRCC5,NUP155,RANBP2,XRCC6,CENPN,RAE1,XPC,PKIA,AHCTF1,CDC42,PLK1,BUB3,NUP98,NUP88,DIAPH2,SUMO2,COX6A1,NUP160,SPC24,ATP5J,NBN,RAD21,NUP210,NUP107,COX6B1,SUMO1,BUB1B,NDC1	-1.04303	-0.261643	58	180
PHOSPHATIDYLCHOLINE BIOSYNTHESIS I	PHOSPHATIDYLCHOLINE BIOSYNTHESIS I	0.377157	0.578948	1	KPNA2,LCMT1,NTN1,HSPA8,EEF2,HSPH1,TUBA1A,PRKAR1A,PPID,ENO3,DOHH,CEP170,KPNA1,RPL27,HSP90AA1,EIF3I,IPO5,ACTA2,ERGIC3,PSME3,MAPK1,RPL4,WASL,RPS17,RPL3,PFKP,GALT,MAT2A,VCP,IPO4,DNAJA1,SLC25A6,ACOT9,COPG1,RPL7,EEF1G,AHCY,HSP90AB1,RPL8,RUVBL2,DNAJA2,SLC25A5,CCT7,MAX,GAPDH,FCHSD2,HSPA9,ECM29,GPI,CS,TXN,ATP5A1,TRRAP,YWHAE,HMGCS1,SLC25A4,CCT4,ACTA1,PGAM1,ARCN1,HSPA2,PGAM2	1.02493	0.22985	62	188
GDP-L-FUCOSE BIOSYNTHESIS I (FROM GDP-D-MANNOSE)	GDP-L-FUCOSE BIOSYNTHESIS I (FROM GDP-D-MANNOSE)	0.390748	0.596014	-1	HIST1H1D,LAMC1,GNAZ,HIST1H1C,DSP,MGMT,SLC2A3,JUP,CDH1,ZKSCAN1,HMGA1,SLC2A1,MYH8,ERCC2,MYH3,CD44,HIST1H1E,NCL,RALB,XRCC1,PFKL,H2AFX,TPR,NCAM1,PYGM,HIST1H1B,HLA-C,MYL6B,PTPRF,UMPS,DES,TRIM27,HSP90B1,POU2F1,XRCC5,SRC,SON,XRCC6	-1.03224	-0.259467	38	178
ALANINE BIOSYNTHESIS II	ALANINE BIOSYNTHESIS II	0.39703	0.598026	-1	HIST1H1D,LAMC1,HIST1H1C,DSP,MGMT,SLC2A3,JUP,CDH1,ZKSCAN1,HMGA1,SLC2A1,MYH8,ERCC2,MYH3,CD44,HIST1H1E,RALB,PFKL,H2AFX,TPR,RRP1B,NCAM1,PYGM,HIST1H1B,HLA-C,MYH15,MYL6B,PTPRF,UMPS,DES,TRIM27,HSP90B1,POU2F1,XRCC5,SRC,SON,XRCC6,TCF3,MYH2,MYH7B,PDIA4,GPT2,YBX3,H3F3A,RPA2,PRKAR2A,TOP2A,PRKCSH,MYH13,G6PD,FDPS,RRAS,MYH7,CD46,TOP1,UNG	-1.02944	-0.257986	56	181
ALANINE DEGRADATION III	ALANINE DEGRADATION III	0.39703	0.598026	-1	HIST1H1D,LAMC1,HIST1H1C,DSP,MGMT,SLC2A3,JUP,CDH1,ZKSCAN1,HMGA1,SLC2A1,MYH8,ERCC2,MYH3,CD44,HIST1H1E,RALB,PFKL,H2AFX,TPR,RRP1B,NCAM1,PYGM,HIST1H1B,HLA-C,MYH15,MYL6B,PTPRF,UMPS,DES,TRIM27,HSP90B1,POU2F1,XRCC5,SRC,SON,XRCC6,TCF3,MYH2,MYH7B,PDIA4,GPT2,YBX3,H3F3A,RPA2,PRKAR2A,TOP2A,PRKCSH,MYH13,G6PD,FDPS,RRAS,MYH7,CD46,TOP1,UNG	-1.02944	-0.257986	56	181
UDP-D-XYLOSE AND UDP-D-GLUCURONATE BIOSYNTHESIS	UDP-D-XYLOSE AND UDP-D-GLUCURONATE BIOSYNTHESIS	0.403211	0.603564	-1	HIST1H1D,LAMC1,HIST1H1C,DSP,MGMT,SLC2A3,JUP,CDH1,ZKSCAN1,HMGA1,ARHGEF16,SLC2A1,MYH8,ERCC2,MYH3,CD44,PHB,HIST1H1E,RALB,PFKL,H2AFX,TPR,UGDH,NCAM1,PYGM,HIST1H1B,HLA-C,MYL6B,PTPRF,UMPS,DES,TRIM27,HSP90B1,POU2F1,XRCC5,SRC,XRCC6,TCF3,TGOLN2,PDIA4,YBX3,RPA2,PRKAR2A,TOP2A,ANAPC11,PRKCSH,SIRT1,G6PD,FDPS,RRAS,MYH7,CD46,TOP1,UNG,SUMO2	-1.02526	-0.258546	55	174
GLYCOLYSIS I	GLYCOLYSIS I	0.409458	0.609133	1	UBE2H,FGFR1,HSPA8,MYH11,ARHGEF6,EEF1A2,HSPH1,TUBA1A,PRKAR1A,ZNF16,CFL1,HERC1,ENO3,RRAGA,TRAF6,DAPK1,ATP5B,DYNC1H1,TUBB4B,LSM1,HSP90AA1,VDAC1,CKB,GSPT1,ACTA2,CASP3,CKMT2,USP5,LDHB,RPTOR,ABCE1,PCNA,UPF1,NMD3,PFKP,MAT2A,PARK2,LSM3,SLC25A6,GSPT2,ISG15,MTOR,HSD17B10,PSMD4,MYH10,VDAC3,HSP90AB1,HK1,SLC25A5,GAPDH,USP13,AKT3,FYN,GPI,TXN,ATP5A1,UPF2,SLC25A4,ACTA1,PGAM1,HSPA2,PGAM2,KTI12,ZFP36,PRKACA,TUBB2A	1.01351	0.228268	66	183
MITOCHONDRIAL L-CARNITINE SHUTTLE PATHWAY	MITOCHONDRIAL L-CARNITINE SHUTTLE PATHWAY	0.413512	0.611388	-1	HIST1H1D,LAMC1,ARG2,HIST1H1C,DSP,SLC2A3,JUP,CDH1,HSPB2,SLC2A1,MYH8,MYH3,CD44,GNAS,HIST1H1E,LYN,MOV10,RALB,ENO1,H2AFX,TPR,TOR1AIP1,NCAM1,PYGM,HIST1H1B,HLA-C,MYL6B,PTPRF,UMPS,TRIM27,HSP90B1,POU2F1,XRCC5,SRC,XRCC6,ADCK3,TCF3,PDIA4,PTPMT1,RPA2,PRKAR2A,TOP2A,WDR5,PRKCSH,TP53,G6PD,FDPS,RRAS,MYH7,CD46,TOP1,UNG,SUMO2	-1.02078	-0.257416	53	174
GLUTAMATE BIOSYNTHESIS II	GLUTAMATE BIOSYNTHESIS II	0.429762	0.627713	-1	LAMC1,ATF2,DSP,SLC2A3,JUP,CDH1,SLC2A1,MYH8,MYH3,CD44,DLG1,FN1,HIST1H1E,MOV10,RALB,SMN1,H2AFX,TPR,VTN,JUN,CEP128,NCAM1,PYGM,SHMT2,HLA-C,MYL6B,PTPRF,UMPS,ATL3,TRIM27,HSP90B1,POU2F1,XRCC5,SRC,XRCC6,ATL2,MCM2,TCF3,SEC62,DYNLL1,PDIA4,RPA2,PRKAR2A,TOP2A,ACTB,PPP2R1B,PRKCSH,G6PD,FDPS,RRAS,MYH7,CD46,TOP1,UNG	-1.0131	-0.256244	54	169
GLUTAMATE DEGRADATION X	GLUTAMATE DEGRADATION X	0.429762	0.627713	-1	LAMC1,ATF2,DSP,SLC2A3,JUP,CDH1,SLC2A1,MYH8,MYH3,CD44,DLG1,FN1,HIST1H1E,MOV10,RALB,SMN1,H2AFX,TPR,VTN,JUN,CEP128,NCAM1,PYGM,SHMT2,HLA-C,MYL6B,PTPRF,UMPS,ATL3,TRIM27,HSP90B1,POU2F1,XRCC5,SRC,XRCC6,ATL2,MCM2,TCF3,SEC62,DYNLL1,PDIA4,RPA2,PRKAR2A,TOP2A,ACTB,PPP2R1B,PRKCSH,G6PD,FDPS,RRAS,MYH7,CD46,TOP1,UNG	-1.0131	-0.256244	54	169
LACTOSE DEGRADATION III	LACTOSE DEGRADATION III	0.436334	0.632054	-1	HIST1H1D,LAMC1,HIST1H1C,DSP,MGMT,SLC2A3,JUP,CDH1,ZKSCAN1,HMGA1,SLC2A1,RASA3,MYH8,MYH3,CD44,HIST1H1E,RALB,H2AFX,TPR,NCAM1,PYGM,HIST1H1B,VAPA,HLA-C,MYL6B,PTPRF,UMPS,TNFRSF10B,TRIM27,HSP90B1,POU2F1,XRCC5,SRC,XRCC6,TCF3,PDIA4,YBX3,RPA2,PRKAR2A,TOP2A,MADD,PRKCSH,G6PD,PLK1,FDPS,RRAS,MYH7,CD46,TOP1,UNG	-1.01084	-0.255566	50	170
NICOTINE DEGRADATION IV	NICOTINE DEGRADATION IV	0.442499	0.632054	-1	ADAMTSL4,ATF2,PPL,MLLT4,CYP27A1,ADD3,HSPB2,CYP51A1,RAP2C,IQGAP1,GTF2I,RAVER1,JUN,NUP35,UGDH,CYP2S1,ACAD8,A2M,CYB5A,RECQL,PGRMC1,JUND,VAMP7,LONP1,CD36,RAP2B,VRK1	-1.00924	-0.266202	27	121
FORMALDEHYDE OXIDATION II (GLUTATHIONE-DEPENDENT)	FORMALDEHYDE OXIDATION II (GLUTATHIONE-DEPENDENT)	0.445374	0.632054	-1	HIST1H1D,LAMC1,HIST1H1C,DSP,MGMT,SLC2A3,JUP,CDH1,ZKSCAN1,HMGA1,SLC2A1,MYH8,MYH3,CD44,FN1,HIST1H1E,RALB,HDAC1,H2AFX,TPR,VTN,ARNT,NCAM1,PYGM,HIST1H1B,HLA-C,NOC3L,MYL6B,PTPRF,UMPS,DES,HSPA4L,TRIM27,HSP90B1,POU2F1,XRCC5,SRC,XRCC6,TCF3,PDIA4,DDX24,YBX3,RPA2,PRKAR2A,TOP2A,PRKCSH,TP53,COQ7,G6PD,FDPS,RRAS,MYH7,CD46,TOP1,UNG,SUMO2	-1.00827	-0.252652	56	182
GLUTATHIONE-MEDIATED DETOXIFICATION I	GLUTATHIONE-MEDIATED DETOXIFICATION I	0.445847	0.632054	1	MAP1LC3B,NCDN,CYP2J2,NTMT1,EPS8,HSPA8,GSTM3,RAB3GAP1,XPO4,RAB3GAP2,PTEN,ATG5,TRAF6,EIF4G2,LRPPRC,DDX5,ATP5B,TUBB,TUBB4B,VDAC1,AHSA1,APLP1,OTUB1,MAPK1,OGFR,SNCA,PFKP,RPS6KA3,VCP,DVL2,POLR1C,IKBKB,ISG15,USO1,COPG1,HMGA2,MINOS1,TIMM23,PRDX6,FAR1,HSD17B10,RPAIN,MGST3,GABARAPL2,DCTN1,MAX,PDXDC1,GSTK1,GSTM2,GSTT1,MAPK14,EIF2B2,HSPA2,NEDD8,VIM,GSTZ1,TUBB2A,CCT8,GSTO1,SH3GLB1,MAPK9	1.00264	0.225563	61	185
4-HYDROXY-2-NONENAL DETOXIFICATION	4-HYDROXY-2-NONENAL DETOXIFICATION	0.445847	0.632054	1	MAP1LC3B,NCDN,CYP2J2,NTMT1,EPS8,HSPA8,GSTM3,RAB3GAP1,XPO4,RAB3GAP2,PTEN,ATG5,TRAF6,EIF4G2,LRPPRC,DDX5,ATP5B,TUBB,TUBB4B,VDAC1,AHSA1,APLP1,OTUB1,MAPK1,OGFR,SNCA,PFKP,RPS6KA3,VCP,DVL2,POLR1C,IKBKB,ISG15,USO1,COPG1,HMGA2,MINOS1,TIMM23,PRDX6,FAR1,HSD17B10,RPAIN,MGST3,GABARAPL2,DCTN1,MAX,PDXDC1,GSTK1,GSTM2,GSTT1,MAPK14,EIF2B2,HSPA2,NEDD8,VIM,GSTZ1,TUBB2A,CCT8,GSTO1,SH3GLB1,MAPK9	1.00264	0.225563	61	185
L-CYSTEINE DEGRADATION III	L-CYSTEINE DEGRADATION III	0.452795	0.63815	-1	HIST1H1D,LAMC1,GNAZ,HIST1H1C,DSP,MGMT,SLC2A3,JUP,CDH1,ZKSCAN1,HMGA1,SLC2A1,MYH8,ERCC2,MYH3,CD44,HIST1H1E,RALB,XRCC1,PFKL,H2AFX,TPR,NCAM1,PYGM,HIST1H1B,HLA-C,MYL6B,PTPRF,UMPS,DES,HSPA4L,TRIM27,HSP90B1,POU2F1,XRCC5,SRC,SON,XRCC6,TCF3,RAE1,PDIA4,YBX3,RPA2,PRKAR2A,TOP2A,PRKCSH,G6PD,FDPS,RRAS,MYH7,CDH2,CD46,TOP1,UNG,SUMO2	-1.00466	-0.252129	55	179
METHYLGLYOXAL DEGRADATION VI	METHYLGLYOXAL DEGRADATION VI	0.455642	0.638429	-1	HIST1H1D,LDHD,LAMC1,HIST1H1C,DSP,MGMT,SLC2A3,JUP,CDH1,ZKSCAN1,HMGA1,ZC3HAV1,SLC2A1,MYH8,TCAP,MYH3,CD44,HIST1H1E,RALB,H2AFX,TPR,NCAM1,PYGM,HIST1H1B,HLA-C,VRK2,MYL6B,PTPRF,UMPS,ACAD8	-1.00395	-0.251597	30	181
GLYCINE BETAINE DEGRADATION	GLYCINE BETAINE DEGRADATION	0.458991	0.639403	1	MAP1LC3B,RABGAP1L,ADAM19,HSPA8,EEF2,GLUD2,EEF1A2,HSPH1,ABCF3,GRK6,GOT1,NAP1L4,NAP1L1,KIF21A,KLHDC4,KPNA1,LSM1,NR3C1,ASF1A,LAMTOR3,OTUB1,PTRHD1,STRADA,ALDH16A1,KIAA0907,PCNA,STRIP1,ENOX2,UBR4,RNF10,ADAL,HERC4,PSMD4,HSP90AB1,RPL8,PRUNE,HSPA9,USP10,CS,YARS,NAB1,HARS2,HUWE1,ZBTB8OS,BHMT,HSPA2,ITPA,NPEPPS,DECR1,UBA5,HSPA6,EIF1B	0.999149	0.227059	52	171
METHYLGLYOXAL DEGRADATION I	METHYLGLYOXAL DEGRADATION I	0.479348	0.662506	-1	HIST1H1D,LAMC1,HIST1H1C,DSP,MGMT,SLC2A3,JUP,CDH1,ZKSCAN1,HMGA1,SLC2A1,MYH8,ERCC2,MYH3,CD44,HIST1H1E,RALB,BST2,PFKL,H2AFX,TPR,NCAM1,PYGM,HIST1H1B,HLA-C,MYL6B,PTPRF,UMPS,TERF2IP,DES,WDR45B,HSPA4L,TRIM27,HSP90B1,POU2F1,XRCC5,EWSR1,SRC,SON,XRCC6	-0.994106	-0.250228	40	177
GLYCEROL DEGRADATION I	GLYCEROL DEGRADATION I	0.481073	0.662506	1	BRAF,FGFR1,ADH5,HSPA8,EEF2,TPT1,AKR1B1,MRPS2,HSPH1,ABCB10,PRKAR1A,RNH1,EIF4G1,ENO3,EIF2B3,APEH,DMD,HARS,EIF2S2,CDK4,CKB,EIF2S1,EIF2B4,UBL4A,PRDX2,IPO13,ERGIC3,PABPC1,PEPD,SNCA,AKR1A1,EIF2B5,NUFIP1,PCNA,MAT2A,PARK2,DNAJA1,SLC25A6,HSPE1	0.992377	0.22552	39	171
PURINE RIBONUCLEOSIDES DEGRADATION TO RIBOSE-1-PHOSPHATE	PURINE RIBONUCLEOSIDES DEGRADATION TO RIBOSE-1-PHOSPHATE	0.487448	0.667471	-1	LAMC1,ATF2,DSP,SLC2A3,EPB41,JUP,IFI16,CDH1,SLC2A1,MYH8,MYH3,HIST1H1E,MOV10,RALB,ENO1,PIAS2,TPR,JUN,NCAM1,NOS1AP,PYGM,HLA-C,MYL6B,RBL2,PTPRF,UMPS,TERF2IP,TMED10,HSPA4L,TRIM27,LYRM1,HSP90B1,POU2F1,XRCC5,SRC,XRCC6,MCM2,TCF3,PDIA4,RPA2,PRKAR2A,TOP2A,ACTB,PRKCSH,TP53,G6PD,FDPS,RRAS,MYH7,CD46,UCHL5,TOP1,UNG,SUMO2	-0.988919	-0.249697	54	173
ASPARAGINE BIOSYNTHESIS I	ASPARAGINE BIOSYNTHESIS I	0.493722	0.672243	1	NTN1,BRAF,FGFR1,DNAJB5,ADH5,HSPA8,EEF2,TPT1,AKR1B1,MRPS2,HSPH1,ATG101,PRKAR1A,ATXN1,STRN4,RNH1,ENO3,STMN1,APEH,MRPS16,MRPS9,DMD,HARS,LSM1,CDK4,RPS2,CKB,GSPT1,UBL4A,PABPC1,OTUB1,PEPD	0.989649	0.223252	32	182
CITRULLINE-NITRIC OXIDE CYCLE	CITRULLINE-NITRIC OXIDE CYCLE	0.514608	0.695969	1	DNAJC7,HSPA8,NME2,TUBB6,HSPH1,NAP1L1,HERC1,ZSWIM8,ARRB1,RPS18,PPM1B,HSPB1,DMD,PPP2R1A,HSP90AA1,ARAF,RPL23,YBX1,NFKB1,WASL,TIMM50,NOSIP,RPS17,PSMA5,PICK1,TCEB2,VCP,DNAJA1,ACTN2,ASS1,USP4,RPL7,C1QBP,HSD17B10,PSMD4,HSP90AB1,PSMA1,RUVBL2,DNAJA2,SLC25A5,CCT7,PSMA7,DNM2,NSFL1C,SSBP1,STRAP,GAPDH,HSPA9,PCBP2,BAG2,UBA52,YWHAE,ATP2A2,HUWE1,RPS3,CCT4,HSPA2,CLNS1A,REL,CCT3,CCT8,PSMA6,HSPA6,CDK2,RPL31,SLC25A3…	0.981257	0.219395	73	195
NAD BIOSYNTHESIS FROM 2-AMINO-3-CARBOXYMUCONATE SEMIALDEHYDE	NAD BIOSYNTHESIS FROM 2-AMINO-3-CARBOXYMUCONATE SEMIALDEHYDE	0.516923	0.695969	-1	HIST1H1D,LAMC1,HIST1H1C,DSP,MGMT,SLC2A3,JUP,CDH1,SLC2A1,MYH8,MYH3,CD44,RAVER2,HIST1H1E,SMARCD2,RALB,PIK3C2A,CRY2,SCAF4,H2AFX,TPR,NCAM1,PYGM,HIST1H1B,HLA-C,MYL6B,PTPRF,UMPS	-0.975776	-0.246067	28	174
ACETYL-COA BIOSYNTHESIS III (FROM CITRATE)	ACETYL-COA BIOSYNTHESIS III (FROM CITRATE)	0.522889	0.696951	-1	HIST1H1D,LAMC1,HIST1H1C,DSP,MGMT,SLC2A3,JUP,CDH1,SLC2A1,MYH8,MYH3,CD44,FN1,HIST1H1E,TRIM25,RALB,CRY2,DTNA,H2AFX,TPR,JUN,NCAM1,PYGM,HIST1H1B,HLA-C,DTNB,NOTCH3,MYL6B,PTPRF,UMPS	-0.973585	-0.245825	30	173
PHOSPHATIDYLETHANOLAMINE BIOSYNTHESIS II	PHOSPHATIDYLETHANOLAMINE BIOSYNTHESIS II	0.523436	0.696951	-1	HIST1H1D,LAMC1,HIST1H1C,DSP,MGMT,SLC2A3,JUP,CDH1,ZKSCAN1,HMGA1,SLC2A1,MYH8,ERCC2,MYH3,CD44,HIST1H1E,RALB,PFKL,H2AFX,TPR,MPP5,NCAM1,PYGM,HIST1H1B,HLA-C,MYL6B,NDUFS6,PTPRF,UMPS,DES,HSPA4L,TRIM27,HSP90B1,POU2F1,XRCC5,SRC,SON,XRCC6	-0.9761	-0.244962	38	179
3-PHOSPHOINOSITIDE DEGRADATION	3-PHOSPHOINOSITIDE DEGRADATION	0.528626	0.698204	1	DBN1,SORBS2,FLNC,PIK3R1,HSPA8,INPP4B,PARK7,BCAR1,RHOT2,EPHA2,PTEN,EGR1,PBK,PTPN11,SYNJ2,SH3GL3,ARRB1,AAK1,ARPC1A,WWP2,APPL1,WASL,ARPC4,ARPC5,GAK,SHC1,PPP3CB,INPP4A,DVL2	0.974093	0.224679	29	154
GUANOSINE NUCLEOTIDES DEGRADATION III	GUANOSINE NUCLEOTIDES DEGRADATION III	0.530969	0.698204	-1	LAMC1,ATF2,SLC2A3,EPB41,IFI16,CDH1,GNAQ,SLC2A1,MYH3,HIST1H1E,DEGS1,MOV10,RALB,ENO1,TPR,JUN,NOS1AP,COX7C,CYP2S1,PYGM,AFF1,HLA-C,RBL2,PTPRF,UMPS,TMED10,HSPA4L,HSDL1,RHOG,LYRM1,PDS5A,XRCC5,SRC,SDCBP,XRCC6,MCM2	-0.970941	-0.245967	36	167
FATTY ACID &BETA;-OXIDATION III (UNSATURATED, ODD NUMBER)	FATTY ACID &BETA;-OXIDATION III (UNSATURATED, ODD NUMBER)	0.533929	0.698204	-1	HIST1H1D,LAMC1,HIST1H1C,DSP,MGMT,ENO2,SLC2A3,JUP,CDH1,ZKSCAN1,HMGA1,SLC2A1,MYH8,MYH3,CD44,HIST1H1E,RALB,ENO1,H2AFX,TPR,NCAM1,PYGM,HIST1H1B,HLA-C,MYL6B,PTPRF,UMPS,FKBP1B,TRIM27,HSP90B1,POU2F1,XRCC5,SRC,XRCC6,TCF3,KDM1A,TPX2,PDIA4,YBX3,RPA2,PRKAR2A,TOP2A,PRKCSH,G6PD,FDPS,RRAS,MYH7,TKT,PGK1,CD46,BCAP29,TOP1,UNG,SUMO2	-0.972023	-0.244331	54	178
CATECHOLAMINE BIOSYNTHESIS	CATECHOLAMINE BIOSYNTHESIS	0.535966	0.698204	1	TGFB1I1,BRAF,PIK3R1,HSPA8,DAPK3,EEF1A2,PIK3CA,RNF14,TUBA1A,PARK7,RCHY1,PTEN,TSC2,TBC1D4,TPMT,IL6ST,DDX5,ARAF,YWHAB,RAF1,CLN5,MAPK1,FAU,NCOA4,GTF2H3,APPL1,SNCA	0.974249	0.221665	27	168
SORBITOL DEGRADATION I	SORBITOL DEGRADATION I	0.542641	0.703099	-1	HIST1H1D,LAMC1,GNAZ,HIST1H1C,DSP,MGMT,SLC2A3,JUP,CDH1,ZKSCAN1,HMGA1,SLC2A1,MYH8,ERCC2,MYH3,CD44,HIST1H1E,NCL,RALB,XRCC1,PFKL,H2AFX,TPR,NCAM1,PYGM,HIST1H1B,HLA-C,MYL6B,PTPRF,UMPS	-0.96801	-0.242825	30	180
D-<IMYO</I-INOSITOL (1,4,5)-TRISPHOSPHATE DEGRADATION	D-<IMYO</I-INOSITOL (1,4,5)-TRISPHOSPHATE DEGRADATION	0.546765	0.704655	1	PGM5,BRAF,FGFR1,EPS8,CLUH,ADH5,HSPA8,EEF2,TPT1,AKR1B1,PRKAR1A,RNH1,AAMP,ENO3,HSPB1,APEH,DMD,HARS,CDK4,CKB,GSPT1,UBL4A,YWHAB,PABPC1,INPP5F,PEPD,GDI2,AKR1A1,PCNA,CNBP,PGLS,VCP,SLC25A6,GOLGA2,UBA3,TRIM54,GDI1,PFDN1,HSP90AB1,CUL3,IMPA1,ANXA7	0.968058	0.220579	42	166
ADENOSINE NUCLEOTIDES DEGRADATION II	ADENOSINE NUCLEOTIDES DEGRADATION II	0.587847	0.750957	-1	LAMC1,ATF2,SLC2A3,EPB41,IFI16,GNAQ,SLC2A1,MYH3,HIST1H1E,DEGS1,MOV10,RALB,ENO1,PIAS2,JUN,NOS1AP,COX7C,CYP2S1,PYGM,AFF1,HLA-C,RBL2,PTPRF,UMPS,TERF2IP,TMED10,HSPA4L,HSDL1,RHOG,LYRM1,PDS5A	-0.946288	-0.240288	31	163
PYRIDOXAL 5'-PHOSPHATE SALVAGE PATHWAY	PYRIDOXAL 5'-PHOSPHATE SALVAGE PATHWAY	0.588925	0.750957	1	MAP1LC3B,PGM5,BRAF,FGFR1,ADH5,HSPA8,EEF2,TPT1,AKR1B1,TUBB6,HSPH1,PRKAR1A,RNH1,BUB1,ENO3,KPNA1,PNPO,APEH,TUBB,DMD,HARS,TUBB4B,CDK4,RPS2,CKB,GSPT1,UBL4A,ACTA2,PABPC1,PEPD,EIF4E,AKR1A1,NQO2,PCNA,CNBP	0.961235	0.217302	35	180
INOSINE-5'-PHOSPHATE BIOSYNTHESIS II	INOSINE-5'-PHOSPHATE BIOSYNTHESIS II	0.615652	0.780906	-1	HIST1H1D,LAMC1,HIST1H1C,DSP,MGMT,ENO2,SLC2A3,JUP,CDH1,ZKSCAN1,HMGA1,SLC2A1,MYH8,MYH3,CD44,HIST1H1E,RALB,H2AFX,TPR,JUN,CEP128,NCAM1,PYGM,SHMT2,HIST1H1B,HLA-C,MYL6B,PTPRF,UMPS	-0.938212	-0.236594	29	174
EUMELANIN BIOSYNTHESIS	EUMELANIN BIOSYNTHESIS	0.625689	0.789481	-1	NRAS,KRAS,MYL7,CTNNA3,LGALS1,CDH1,STX3,LRP1,TJP1,FN1,CTNNA1,SPIN1,CKAP4,RAVER1,HRAS,HDAC1,CBX5,RAP1B,CTNNB1,PAK4,FGG,MYL6B,RBL2,CBX3,SCFD1,IGF2BP2,TUBB2B,RAP1A,CIB1,POU2F1,NCOA1,SRC,HIRA,TCF7L1,DAG1,RYBP,SLC25A1	-0.932163	-0.236144	37	167
GLYCINE BIOSYNTHESIS I	GLYCINE BIOSYNTHESIS I	0.631083	0.792141	1	MAP1LC3B,RABGAP1L,ADAM19,HSPA8,EEF2,GLUD2,EEF1A2,HSPH1,ABCF3,GRK6,GOT1,NAP1L4,NAP1L1,KIF21A,KLHDC4,KPNA1,GOLPH3L,LSM1,ASF1A,OTUB1,PTRHD1,PLEKHF2,STRADA,KIAA0907,PCNA,STRIP1,ENOX2,UBR4,RNF10,ADAL,HERC4,PSMD4,HSP90AB1,RPL8,PALMD,PRUNE,HSPA9,USP10,CS,YARS,NAB1,HARS2,HUWE1,ZBTB8OS,HSPA2,ITPA,NPEPPS,DECR1,UBA5,HSPA6,EIF1B	0.944278	0.214308	51	172
SUPEROXIDE RADICALS DEGRADATION	SUPEROXIDE RADICALS DEGRADATION	0.644295	0.804535	1	NTMT1,HSPA8,NME2,AKR1B1,ANXA6,HSPH1,COMMD1,EIF5A,PARK7,GOT1,MCC,PTPN11,EEF1D,SQSTM1,TNIK,KPNA1,REXO2,PPP2R1A,TIMM13,SMAD2,MAPK1,DYNLT1,NFKB1,PCNA,UPF1,MRPS25,DNAJA1,RPS21,NME1,ACOT9,MARCH5,MINOS1,CAMK1,KEAP1,HSD17B10,RAB4A,PSMD4,FKBP1A,PSMA1,DCTN1,CCDC8,CAT,CAT,SSBP1,MAX,UCHL3,CYC1,PPIA,CS,TXN,FOXO3,EIF2B2,HSPA2,RPF2,FH,RPL21,CRYAB,HSPA6,EIF1B,DYNC1LI1	0.943017	0.213441	60	176
GLUTATHIONE BIOSYNTHESIS	GLUTATHIONE BIOSYNTHESIS	0.665111	0.824928	-1	HIST1H1D,LAMC1,HIST1H1C,DSP,MGMT,SLC2A3,JUP,CDH1,ZKSCAN1,HMGA1,SLC2A1,MYH8,ERCC2,MYH3,CD44,HIST1H1E,RALB,PFKL,H2AFX,TPR,NCAM1,PYGM,HIST1H1B,HLA-C,MYL6B,PTPRF,UMPS,DES,CPSF4,HSPA4L,TRIM27,HSP90B1,POU2F1,XRCC5,SRC	-0.918173	-0.230795	35	178
TYROSINE DEGRADATION I	TYROSINE DEGRADATION I	0.667473	0.824928	-1	HSPG2,LAMC1,ADAMTSL4,DSP,SLC2A3,JUP,CDH1,SLC2A1,MYH8,MYH3,CD44,HIST1H1E,RALB,HDAC1,TPR,NCAM1,PYGM,HLA-C,CTNNB1,MYL6B,PTPRF,UMPS,UBE3A,TRIM27,HSP90B1,POU2F1,XRCC5,NCOA1,SRC,XRCC6,TCF3,KDM1A,PDIA4,ZNF217,RPA2,PRKAR2A,TOP2A,PRKCSH,EP300,TP53,G6PD,FDPS,RRAS,MYH7,SMARCA4,CD46,TOP1,UNG	-0.916087	-0.232071	48	167
THIOSULFATE DISPROPORTIONATION III (RHODANESE)	THIOSULFATE DISPROPORTIONATION III (RHODANESE)	0.68269	0.83943	-1	CLU,NTHL1,HIST1H2BD,HIST1H2BM,MAT1A,ENO2,MFHAS1,HIST1H2BN,NDUFS1,GTF2I,HRAS,HIST1H2BC,PFKL,HDAC1,ENO1,H2AFX,HIST3H2BB,TST,NDUFV2,PML,NDUFS6,NDUFA5,HIST1H2AC,SSRP1,POLR2D,SMC1A,HSPA4L,CA2,ISCU,HIST1H2AJ,PPIE,NDUFV3,NDUFA12,XRCC6,NDUFA2,PRDX4,HIST2H2AB,TOP2A,UBA2,ACTB,NDUFA9,SMC5,TP53,PPA2,NDUFA6,HIST1H2BK,TKT,PGK1	-0.914303	-0.226778	48	201
SUCROSE DEGRADATION V (MAMMALIAN)	SUCROSE DEGRADATION V (MAMMALIAN)	0.690644	0.84481	1	TNNI3,ACADVL,HSPA8,HECW2,GLUD2,EEF1A2,TUBA1A,PARK7,CFL1,MCC,BUB1,SURF1,ENO3,TRAF6,ATP5B,PPP2R1A,ATP5I,TUBB4B,HSP90AA1,AHSA1,CKB,YWHAB,PRDX2,ACTA2,OTUB1,CKMT2,MAPK1,LDHB,OGDHL,IDH2,SNCA,PCNA,ACTN2,ISG15,HMGA2,HSD17B10,GALM,PSMD4,HSP90AB1,HK1,UQCRC1,SMAD4,GAPDH,CYC1,USP10,HNRNPK,CS,IVD,ATP5A1,MAPK14,SLC25A4,ACTA1,PGAM1,HSPA2,PGAM2,DLST,NEDD8,VIM,ACO2,NPEPPS,TUBB2A,HSPA6,GLUD1,POLR2C,ACTN1,NDUFB1,ND…	0.933669	0.208081	68	198
GLUTATHIONE REDOX REACTIONS I	GLUTATHIONE REDOX REACTIONS I	0.694076	0.84481	1	GLRX2,BRAF,FGFR1,ADH5,HSPA8,EEF2,TPT1,AKR1B1,HSPH1,PRKAR1A,RNH1,PPID,ENO3,CEP170,GPX4,APEH,DMD,HARS,TMEM159,CDK4,RPS2,CKB,GSPT1,UBL4A,PABPC1,OTUB1,PEPD,FAM96B,AKR1A1,ASNA1,PCNA,UPF1,CNBP	0.924879	0.21074	33	166
RETINOL BIOSYNTHESIS	RETINOL BIOSYNTHESIS	0.707014	0.855249	1	BRAF,CYTH2,FGFR1,ADH5,HSPA8,LRSAM1,EEF1A2,TUBA1A,PRKAR1A,ARHGAP1,SEC31A,BUB1,RNF123,RDH14,DMD,HARS,TUBB4B,CDK4,UBL4A,PABPC1,RPL11,FKBP9,COA3,PCNA,CNBP,RPS6KA3,BMPR2,SLC25A6,ISG15,HMGA2,L3HYPDH,MINOS1,NRG1,HSD17B10,RNF31,CUL2,SLC25A5,RBPMS,ADHFE1,GAPDH,TXN,YWHAE,ZBTB8OS,SLC25A4,ACTA1,POMK	0.916912	0.213144	46	147
CREATINE-PHOSPHATE BIOSYNTHESIS	CREATINE-PHOSPHATE BIOSYNTHESIS	0.70979	0.855249	-1	LAMC1,BRD4,OLFML3,SLC2A3,CDH1,HSPB2,SLC2A1,MYH8,MYH3,HIST1H1E,MOV10,RALB,ENO1,TPR,JUN,TRAF3IP1,NCAM1,NOS1AP,PYGM,HLA-C,LDHA,SF1,MYL6B,PTPRF,UMPS,TRIM27,HSP90B1,POU2F1,XRCC5,SRC,XRCC6,TCF3,TRIM63,PDIA4,PRKAR2A,TOP2A,PRKCSH,G6PD,FDPS,RRAS,MYH7,PGK1,UNC119,TOP1,UNG,SUMO2	-0.89758	-0.227555	46	166
GLUTAMINE BIOSYNTHESIS I	GLUTAMINE BIOSYNTHESIS I	0.713722	0.855249	1	BRAF,FGFR1,DNAJB5,ADH5,HSPA8,EEF2,TPT1,AKR1B1,PRKAR1A,RNH1,MTG2,ENO3,GPX4,APEH,DMD,HARS,CDK4,CKB,GSPT1,UBL4A,YWHAB,ASPSCR1,ZFAND2B,PABPC1,PEPD,TAF9B,MAPK1,PLEKHF2,NFKB1,SNCA,AKR1A1,PCNA	0.918018	0.208622	32	171
5-AMINOIMIDAZOLE RIBONUCLEOTIDE BIOSYNTHESIS I	5-AMINOIMIDAZOLE RIBONUCLEOTIDE BIOSYNTHESIS I	0.716847	0.855249	1	NTN1,CLUH,HSPA8,EEF2,HSPH1,CBS,ARHGAP1,ATXN1,MCC,MVD,ENO3,NARS,TRAF6,HSP90AA1,VARS,PABPC1,OTUB1,VBP1,PFAS,FAM96B,AKR1A1,PPAT,CNBP,GARS,MAT2A,VCP,DNAJA1,SARS2,GBAS,COPG1,KEAP1,EEF1G,AHCY,PGD,PSMD4,CSNK2B,HSP90AB1,AARS,HK1,DNAJA2,PSMA7,NOB1,EIF4A2,GAPDH,HSPA9,USP10,GPI,EIF4A1,CS,YWHAE,PNO1,HSPA2,UBA1,NEDD8,NPEPPS,PSMA6,HSPA6	0.926601	0.206943	57	196
ADENINE AND ADENOSINE SALVAGE III	ADENINE AND ADENOSINE SALVAGE III	0.754916	0.892228	-1	LAMC1,ATF2,SLC2A3,EPB41,IFI16,CDH1,SLC2A1,MYH8,MYH3,HIST1H1E,MOV10,RALB,ENO1,PIAS2,TPR,JUN,NCAM1,NOS1AP,PYGM,HLA-C,RBL2,PTPRF,UMPS,TERF2IP,TMED10,HSPA4L,TRIM27,ISCU,LYRM1,HSP90B1,XRCC5,EWSR1,SRC,SDCBP,XRCC6,MCM2	-0.881423	-0.222274	36	174
GUANINE AND GUANOSINE SALVAGE I	GUANINE AND GUANOSINE SALVAGE I	0.755247	0.892228	-1	LAMC1,ATF2,SLC2A3,EPB41,JUP,IFI16,CDH1,SLC2A1,MYH8,MYH3,HIST1H1E,MOV10,RALB,ENO1,TPR,JUN,NCAM1,NOS1AP,PYGM,HLA-C,MYL6B,RBL2,PTPRF,UMPS,TMED10,HSPA4L,TRIM27,ISCU,LYRM1,HSP90B1,POU2F1,XRCC5,EWSR1,SRC,SDCBP,XRCC6,MCM2	-0.88075	-0.221915	37	175
THIAMIN SALVAGE III	THIAMIN SALVAGE III	0.766662	0.8939	-1	PARP2,CHERP,RNPS1,PRCC,SRSF9,SF1,PQBP1,RBM17,POLR2I,WBP11,LSM2,FBXO2,SRSF4,HNRNPU,POLR2D,CWC15,PRPF40B,SNRPA,LSM4,PTBP1,PPIE,HNRNPR,TGFBR1,PRPF8,SNRPB2,U2SURP,SRSF11,SNW1,LSM7,ISY1,CDC5L,SNRPN,PRPF19,DDX46,SNRPA1,SRRM1,RBM22,CCAR1,HNRNPA3,WBP4,PRPF40A,SF3B6,HNRNPA0,SNRPC,SF3B2,PRPF4,PRPF31,SF3B3,SF3A2,SNRNP40,TGFB1,CRNKL1,HNRNPC,CTNNBL1,LSM6,SF3B1,HNRNPUL1,USP39,SF3B5,NCBP1,TRIM21,NCBP2,SRSF1,RCC…	-0.883311	-0.218594	75	206
HISTAMINE BIOSYNTHESIS	HISTAMINE BIOSYNTHESIS	0.767028	0.8939	1	ADAM19,SORBS2,DNM1L,HSPA8,SCYL1,SYNJ2,SH3GL3,ARRB1,PTPN23,ATXN2,UBE2D1,HSP90AA1,AAK1,APEX1,ARPC1A,WWP2,ITCH,YWHAB,MAPK1,FAU,WASL,ARPC4,ARPC5,GAK,RPS6KA3,PARK2,DVL2,MAP4K3,GOLGA2,DTX2	0.898713	0.206418	30	159
TRIACYLGLYCEROL DEGRADATION	TRIACYLGLYCEROL DEGRADATION	0.768368	0.8939	-1	LAMC1,ATF2,SLC2A3,CDH1,SLC2A1,LRP1,MYH8,MYH3,SUCLG2,FKBP5,MPZL1,HIST1H1E,RALB,LIPG,CNPY2,TPR,PDIA6,NCAM1,PYGM,HLA-C,DPP9,MYL6B,PTPRF,UMPS,TRIM27,TUBB2B,CDK6,HSP90B1,POU2F1,XRCC5,SRC,XRCC6,UGGT1,PDIA4,UFL1,RPA2,PRKAR2A,TOP2A,ACTB,CANX,PRKCSH,G6PD,FDPS,RRAS,MYH7,TOP1,UNG,RCN1,MYH1,EXOSC5,PNPLA4,SERPINH1,ALAS1	-0.87314	-0.221938	53	162
L-GLUTAMINE BIOSYNTHESIS II (TRNA-DEPENDENT)	L-GLUTAMINE BIOSYNTHESIS II (TRNA-DEPENDENT)	0.771499	0.8939	1	HSPA8,PSME4,HEBP1,TRAF6,PSMF1,GATB,PSMD9,CLPX,PSME3,PSMD5,PSMA5,PSMB6,PSMD4,QRSL1,PSMA1,PSMA7,PSMB3,PSMB4	0.867429	0.222294	18	76
PALMITATE BIOSYNTHESIS I (ANIMALS)	PALMITATE BIOSYNTHESIS I (ANIMALS)	0.789369	0.909082	1	MAP1LC3B,TUBA1A,UBE2N,LGR4,PTEN,BUB1,HERC2,PTPN11,C11ORF68,TRAF6,ARRB1,SQSTM1,SNUPN,ATP5B,TUBB,HSP90AA1,IRAK1,AHSA1,ARIH1,ZNRF2,OTUB1,STAU1,GTF2H3,ILK,SHC1,MAT2A,AASDHPPT,PARK2,DNAJA1,DDB1,RFWD2,ISG15,PPP5C,NOVA1,KDM4A,HSP90AB1,CLIP1,DNAJA2,CCDC8,UBE2V1	0.899667	0.203513	40	177
DOPAMINE DEGRADATION	DOPAMINE DEGRADATION	0.792146	0.909082	1	SULT1E1,TNPO1,DNAJB5,CLUH,HSPA8,MYH11,EEF2,TUBB6,EEF1A2,HSPH1,TUBA1A,CBS,ACSS2,PRKAR1A,ENO3,TPMT,TUBB,PPP2R1A,TUBB4B,LSM1,ASF1A,PRDX2,PPP6R2,CNBP,MAT2A,VCP,IPO4,DNAJA1,ASS1,SLC25A6,HSPE1,PPP6R1,SRP54,EIF6,PGD,PSMD4,MYH10,RUVBL2,DNAJA2,CHST9,SLC25A5,HS2ST1,EIF4A2,HSPA9,USP10,HNRNPK,EIF4A1,PLAA,FDXR,HUWE1,SLC25A4,PGAM1,HSPA2,PGAM2,RPF2,NEDD8,NPEPPS,TUBB2A,CSNK1E,CCT8,HSPA6	0.898898	0.203339	61	177
SEROTONIN AND MELATONIN BIOSYNTHESIS	SEROTONIN AND MELATONIN BIOSYNTHESIS	0.809187	0.924238	1	TGFB1I1,BRAF,PIK3R1,HSPA8,DAPK3,EEF1A2,PIK3CA,RNF14,TUBA1A,PARK7,RCHY1,PTEN,TBC1D4,IL6ST,HSPB1,DDX5,HSP90AA1,ARAF,YWHAB,RAF1,NCOA4,GTF2H3,APPL1	0.886617	0.202899	23	164
LEUKOTRIENE BIOSYNTHESIS	LEUKOTRIENE BIOSYNTHESIS	0.825475	0.934233	-1	LAMC1,SLC2A3,JUP,CDH1,SLC39A10,SLC2A1,MYH8,SLC39A6,SPRY3,MYH3,HIST1H1E,RALB,PFKL,TPR,NCAM1,PYGM,CENPC,HLA-C,MYL6B,PTPRF,UMPS,CHST12,PRPF40B,HSPA4L,TRIM27,HSP90B1,POU2F1,RBPJ,PPIE,XRCC5,SRC,XRCC6,WRB,PDIA4,GFPT2,PRKAR2A,TOP2A,PRKCSH,PRPF40A,G6PD,FDPS,RRAS,MYH7,CD46,TOP1,UNG,CHD4	-0.848054	-0.214208	47	171
PROSTANOID BIOSYNTHESIS	PROSTANOID BIOSYNTHESIS	0.829479	0.934233	1	DNAJC7,HSPA8,NME2,AKR1B1,ANXA6,ISYNA1,SMYD2,ATXN1,MCC,PPID,SURF1,AGO4,TRAF6,EEF1D,HSPB1,DDX5,HSP90AA1,NR3C1,CASP3,PSMD9,OTUB1,MAPK1,AGO2,ABCE1,RIOK3,VCP,ECHS1,NME1,HSPE1,CAPN1,COPG1,HMGA2,PPP5C,EEF1G,ATAD3A,FKBP1A,HSP90AB1,COPS5	0.881238	0.201238	38	165
DERMATAN SULFATE DEGRADATION (METAZOA)	DERMATAN SULFATE DEGRADATION (METAZOA)	0.829962	0.934233	-1	COL2A1,COL14A1,TESC,EPB41L3,SLC9A1,FKBP14,EPHB2,LOXL2,DAB1,CD44,FN1,ST3GAL4,MMP2,VCAN,H2AFX,JUN	-0.84508	-0.214909	16	161
PYRUVATE FERMENTATION TO LACTATE	PYRUVATE FERMENTATION TO LACTATE	0.833445	0.934233	-1	ATF2,BRD4,COL5A1,RAP2C,SUCLG2,NDRG1,FN1,HSD17B12,ENO1,H2AFX,JUN,ARNT,CENPC,RAP1B,CTNNB1,LDHA,CUL4B,RBL2,KDSR,RAB5B,HSP90B1,RAP1A,PTBP3,EWSR1,RAP2B,ATP6V1A,SUZ12,MCM2,RAC3,TRIM63	-0.847398	-0.213693	30	174
UDP-<IN</I-ACETYL-D-GALACTOSAMINE BIOSYNTHESIS II	UDP-<IN</I-ACETYL-D-GALACTOSAMINE BIOSYNTHESIS II	0.844066	0.937513	1	MAP1LC3B,CYTH2,NEURL4,HSPA8,HSPH1,GPD1L,KATNB1,MCC,NAGK,NAP1L4,NAP1L1,ERCC4,C11ORF68,SQSTM1,MED20,KPNA1,TIMM8B,HSP90AA1,GSPT1,ACTA2,PGM3,RPS8,PCNA,CNBP,LSM3,GSPT2,BAD,ISG15,HSPE1,RPL7,EARS2,HSD17B10,PSMD4,HSP90AB1,CYTH1,TNRC18,CUL3,GABARAPL2,THG1L,GAPDH,FCHSD2,HSPA9,USP10,PCBP2,GPI,UBA52,PFKFB2,HUWE1,RPS3,ACTA1,HSPA2,NUP37,NEDD8,NPEPPS,PRKACA,CSNK1E,HSPA6,GNPDA1,CDK2	0.880568	0.198645	59	182
TETRAPYRROLE BIOSYNTHESIS II	TETRAPYRROLE BIOSYNTHESIS II	0.846063	0.937513	1	TIMM17A,NTN1,FGFR1,ADH5,HSPA8,EEF2,TPT1,MRPS2,HSPH1,UROS,ZFYVE26,PRKAR1A,RNH1,ENO3,KPNA1,APEH,DMD,HARS,CDK4,CKB,UBL4A,PRDX2,PABPC1,PEPD,C8ORF33,FOXO1,AKR1A1,PCNA,HMBS,ATG7,SLC25A6,HSPE1,ACOT9	0.875777	0.198638	33	173
SALVAGE PATHWAYS OF PYRIMIDINE DEOXYRIBONUCLEOTIDES	SALVAGE PATHWAYS OF PYRIMIDINE DEOXYRIBONUCLEOTIDES	0.851717	0.937513	-1	COL11A2,LAMC1,COL4A5,GLDC,SLC2A3,ADD1,SLC2A1,MPP1,SDF4,MYH3,FN1,HIST1H1E,MOV10,RALB,CARHSP1,PYGM,HLA-C,CRELD2,PTPRF,UMPS,A2M,RXRA,COL4A2,F13A1,ATP6V1A,FBN3,INPP5K,TYK2,DUS2,PTPRK,TOP2A,ACTB,CCDC94,SMC5,TP53,NMT2,G6PD,RRAS,UNC119,TOP1,SUMO2,TMSB4X,EXT2	-0.833335	-0.211968	43	160
ADENINE AND ADENOSINE SALVAGE I	ADENINE AND ADENOSINE SALVAGE I	0.85193	0.937513	-1	LAMC1,ATF2,MAT1A,SLC2A3,EPB41,IFI16,SLC2A1,MYH3,SUCLG2,FN1,HIST1H1E,MOV10,RALB,PFKL,ENO1,JUN,NOS1AP,PYGM,AGPAT2,HLA-C,RBL2,PTPRF,UMPS,TMED10,HSPA4L,TUBB2B,LYRM1	-0.842019	-0.210841	27	184
THE VISUAL CYCLE I (VERTEBRATES)	THE VISUAL CYCLE I (VERTEBRATES)	0.875878	0.958595	-1	LAMC1,DSP,SLC2A3,JUP,CDH1,SLC2A1,MYH8,GNAI3,MYH3,HIST1H1E,RALB,HDAC1,TPR,NCAM1,PYGM,HLA-C,MYL6B,PTPRF,UMPS,SIN3A,RDH11,TRIM27,ROBO2,HSP90B1,POU2F1,XRCC5,SRC,XRCC6,TCF3,PDIA4,RPA2,PRKAR2A,TOP2A,PRKCSH,TP53,G6PD,FDPS,RRAS,DDI2,MYH7,PON2,CD46,TFDP1,TOP1,UNG,SUMO2	-0.823094	-0.209218	46	162
GLYCEROL-3-PHOSPHATE SHUTTLE	GLYCEROL-3-PHOSPHATE SHUTTLE	0.8852	0.958595	-1	LAMC1,BSG,MAT1A,ENO2,SLC2A3,CDH1,CHEK2,SLC2A1,HEY2,MYH3,HIST1H1E,RALB,PYGL,PAK1,ENO1,H2AFX,TPR,PYGM,HLA-C,OAT,SF1,PTPRF,UMPS,HIST1H2AC	-0.820389	-0.207503	24	169
SEROTONIN DEGRADATION	SEROTONIN DEGRADATION	0.88688	0.958595	1	SULT1E1,TNPO1,DNAJB5,CLUH,ADH5,HSPA8,MYH11,EEF2,TUBB6,EEF1A2,CBS,ACSS2,PRKAR1A,ENO3,TUBB,PPP2R1A,TUBB4B,PRDX2,CNBP,MAT2A,IPO4,DNAJA1,SLC25A6,HSPE1,SRP54,EIF6,HSD17B10,PGD,PSMD4,MYH10,RUVBL2,DNAJA2,CHST9,SLC25A5,HS2ST1,EIF4A2,HSPA9,USP10,HNRNPK,EIF4A1,PLAA,FDXR,YWHAE,SLC25A4,PGAM1,HSPA2,PGAM2,RPF2,NPEPPS,TUBB2A,CCT8,HSPA6	0.8532	0.196024	52	158
CHONDROITIN SULFATE DEGRADATION (METAZOA)	CHONDROITIN SULFATE DEGRADATION (METAZOA)	0.888649	0.958595	-1	COL2A1,COL14A1,TESC,SUMF2,EPB41L3,SLC9A1,PLAUR,EPHB2,DAB1,CD44,FN1,MMP2,VCAN,H2AFX,JUN	-0.811859	-0.206701	15	159
METHYLMALONYL PATHWAY	METHYLMALONYL PATHWAY	0.890976	0.958595	1	HSPA8,MRPL41,CHCHD1,UBE2N,PTEN,HERC2,MRPL51,TRAF6,SQSTM1,MRPL23,MRPL50,IRAK1,MRPL54,WWP2,ARIH1,ZNRF2,MRPL14,OTUB1,GTF2H3,NFKB1,MRPS24,EIF3M,PARK2,RARS2,DVL2,DDB1,MRPL43,PPP2R3A,PCBD1,ISG15,RNF7,MRPL38,PPP5C,MRPS31,SRP54,L3HYPDH,MRRF,HSD17B10,KDM4A,CSNK2B,RUVBL2,MRPL21,UBE2V1,RNF11,BAG2,UBA52,AJUBA,HUWE1,MMAA,HSPA2,MRPL53,UBA1,PHF1	0.858631	0.192931	53	186
PHENYLETHYLAMINE DEGRADATION I	PHENYLETHYLAMINE DEGRADATION I	0.898778	0.962691	-1	MYH6,VAMP8,BSG,ITPR1,GNAQ,STX3,TMOD1,MYH8,TCAP,MYH3,AP2A2,MOV10,SP1,WDFY3,TPR,TACC1,SETD2,SHMT2,CTNNB1,PML,TTN,KCNQ1,RAB10,VAMP5,PRPF40B,SIN3A,DES,TUBB2B,MYL3,PTGES3,CAV1,SUZ12,TRIM63,MYL4,TNNC1	-0.814758	-0.20412	35	183
4-HYDROXYPHENYLPYRUVATE BIOSYNTHESIS	4-HYDROXYPHENYLPYRUVATE BIOSYNTHESIS	0.921892	0.978748	-1	PCK2,HSPG2,VPRBP,ERCC2,NCOA6,NCL,SP1,SMARCD2,HDAC1,JUN,FABP1,ECM1,CUL4B,RBL2,KDM5A,UBE3A,POLR2I,HNRNPU,POLR2D,SIN3A,RPS6KA5,SMARCD1,PBRM1,POU2F1,ARID1A,NCOA1,SRC,PTGES3,CAV1,CDKN1B,XPC,ERCC6,ACTL6A,TOP2A,EP300,TP53,SMARCA2,SMARCA4,SMARCC1,SMARCC2,SUMO2,PBX1,CKS2,NR2F6	-0.79837	-0.200271	44	180
4-HYDROXYBENZOATE BIOSYNTHESIS	4-HYDROXYBENZOATE BIOSYNTHESIS	0.921892	0.978748	-1	PCK2,HSPG2,VPRBP,ERCC2,NCOA6,NCL,SP1,SMARCD2,HDAC1,JUN,FABP1,ECM1,CUL4B,RBL2,KDM5A,UBE3A,POLR2I,HNRNPU,POLR2D,SIN3A,RPS6KA5,SMARCD1,PBRM1,POU2F1,ARID1A,NCOA1,SRC,PTGES3,CAV1,CDKN1B,XPC,ERCC6,ACTL6A,TOP2A,EP300,TP53,SMARCA2,SMARCA4,SMARCC1,SMARCC2,SUMO2,PBX1,CKS2,NR2F6	-0.79837	-0.200271	44	180
ALANINE BIOSYNTHESIS III	ALANINE BIOSYNTHESIS III	0.931758	0.984885	-1	LAMC1,SDHA,SLC2A3,JUP,CDH1,SDHB,SLC2A1,MYH8,FECH,MYH3,SUCLG2,HIST1H1E,HSD17B12,RALB,PIK3C2A,TPR,TST,NCAM1,PYGM,HLA-C,MYL6B,PTPRF,UMPS,RAB5B,TRIM27,ISCU,HSP90B1,CTR9,POU2F1,ARF6,XRCC5,SRC,ATP6V1A,XRCC6,PDIA4,GFPT2,COQ3,PRKAR2A,TOP2A,PPP2R1B,CANX,PRKCSH,TP53,G6PD,FDPS,RRAS,MYH7,TOP1,CTSV,UNG	-0.795672	-0.198452	50	191
PYRIMIDINE RIBONUCLEOTIDES INTERCONVERSION	PYRIMIDINE RIBONUCLEOTIDES INTERCONVERSION	0.944272	0.991866	1	HSPA8,NME2,TUBA1A,VASP,GOT1,ENTPD4,CFL1,SLC38A1,PFN1,APEX1,GRSF1,ASF1A,EVL,PRKCA,MAPK1,TONSL,GINS4,AKAP13,PCNA,CAP2,VCP,PARK2,POLR1C,NME1,SVIL,NTPCR,RRAD,MOB4,PSMD4,KDM4A,PRUNE,PFN2,DNM2,UBE2V1,STRAP,CDK5RAP2,TOMM40,POLA1,MAPK14,CTPS2,HSPA2,NEDD8,UVRAG,VIM	0.821102	0.188593	44	159
CALCIUM TRANSPORT I	CALCIUM TRANSPORT I	0.946901	0.991866	-1	LGALS8,ATP1A2,ATP2B1,ATP1A1,MAT1A,MYH8,SDF4,TCIRG1,MYH3,DLG1,ITPR3,PHB,JAG2,PDZD11,HACD3,TMEM30A	-0.778344	-0.196868	16	169
GLUTAMATE DEGRADATION III (VIA 4-AMINOBUTYRATE)	GLUTAMATE DEGRADATION III (VIA 4-AMINOBUTYRATE)	0.95071	0.991866	1	HSPA8,EEF2,GCFC2,NAP1L1,ENO3,ARRB1,EIF3B,DDX5,PPP2R1A,VDAC1,TMEM159,GSPT1,NR3C1,ACTA2,PABPC1,YBX1,YKT6,NFKB1,ARPC4,SNCA,CNBP,MAT2A,VCP,DNAJA1,LSM3,SLC25A6,PPP5C,EIF6,EEF1G,PGD,PSMD4,CSNK2B,DNAJA2,DNM2,NAPA,ABAT,HSPA9,FYN,HNRNPK,EIF4A1,SEC22B,UBA52,TUFM,ATP5A1,ACTR3,YWHAE,POLR2L,SLC25A4,ACTA1,ARCN1,HSPA2,UBA1,NPEPPS,PRKACA,HSPA6,RAN,CDK2,SHMT1,ACTR2,POLR2C,DNAJB1,PAPOLA,VDAC2	0.824046	0.183705	63	199
CHOLINE DEGRADATION I	CHOLINE DEGRADATION I	0.960185	0.997174	-1	KCNAB2,NTHL1,CHDH,MDC1,NDUFS1,GTF2I,ZBTB33,WDFY3,HIST1H2BC,HDAC1,NUP35,ZMYM4,HIST3H2BB,TP53BP1,COX7C,NDUFV2,RAD54L2,PRKCD,CUL4B,NDUFS6,NDUFA5,NUP54,SSRP1,SMC1A,PBRM1,SP3,NDUFV3,NDUFA2,RAE1,XPC,PHC2,PRDX4,HIST2H2AB,TGM2,NDUFA9,SMC5,MCM6,NDUFA6,RING1,CHD4,SUMO2,TARDBP,MTA1,COX6A1,NUP160,TRIM21,MORC3,TUBA1B,NDUFS5,EXOSC9,NDUFS2,NUP210,NDUFS4,COX6B1,SUMO1	-0.772481	-0.192353	55	194
FLAVIN BIOSYNTHESIS IV (MAMMALIAN)	FLAVIN BIOSYNTHESIS IV (MAMMALIAN)	0.966122	0.997174	-1	GNB4,EFNB3,IQGAP2,ADAM17,ARHGEF16,RASA3,DOCK11,GNB1,NDUFS1,MOV10,PAK1,SMN1,GNB2,PRKCD,TNFRSF10B,RALBP1,JAK1,RAC1,PIP4K2B,OCRL,SRC,SDCBP,CAV1,GNA13	-0.743962	-0.190714	24	150
CERAMIDE BIOSYNTHESIS	CERAMIDE BIOSYNTHESIS	0.96821	0.997174	1	TNPO1,FGFR1,CLUH,ADH5,HSPA8,EEF2,TUBB6,EEF1A2,HSPH1,TUBA1A,PRKAR1A,BUB1,HERC2,RPS16,TUBB,DMD,PPP2R1A,TUBB4B,CDK4,UBL4A,ATP2A3	0.798559	0.181237	21	172
HEME BIOSYNTHESIS FROM UROPORPHYRINOGEN-III I	HEME BIOSYNTHESIS FROM UROPORPHYRINOGEN-III I	0.972858	0.997697	-1	HIST1H2BD,HIST1H2BM,PLAUR,HSPB2,MYH8,FECH,SDF4,MYH3,DLG1,HIST1H2BN,MOV10,WDR89,HIST1H2BC,PFKL,H2AFX,JUN,HIST3H2BB,CAMK2B,MYH15,HIST1H2AC,PRPF40B,SIN3A,WDR45B,HSPA4L,HIST1H2AJ,TBPL2,MCM2,AK2,HMGXB4,MYH2,TFRC,MYH7B,PRDX4,PDIA4,HIST2H2AB,H3F3A,ACTB,PPP2R1B,THBS3,PRPF40A,MYH13,HIST1H2BK,MYH7	-0.757739	-0.189533	43	186
LIPOATE BIOSYNTHESIS AND INCORPORATION II	LIPOATE BIOSYNTHESIS AND INCORPORATION II	0.99088	0.997979	-1	GLDC,LIAS,AMT,MYH8,MYH3,GNB1,PFKL,H2AFX,TPR,NUP62,CHMP4C,SHMT2,DHTKD1,NUP153,HIST1H2AC,SSRP1,LIPT1,RAB5B,WDHD1,LIPT2,PDHX,HSP90B1,HIST1H2AJ,BCKDHB,RANBP2,ATP6V1A,XRCC6,MCM2,VPS37A,CDKN1B,PDIA4,HIST2H2AB,H3F3A,RPA2,PRKAR2A,ACTB,PPP2R1B,ORC3,EP300,MCM6,TP53	-0.715844	-0.178765	41	189
SPERMINE AND SPERMIDINE DEGRADATION I	SPERMINE AND SPERMIDINE DEGRADATION I	0.996094	0.997979	-1	ERCC2,FN1,GNB1,LRRC41,HDAC1,ARNT,TCEB3,CPSF2,RBL2,RBM17,POLR2I,WBP11,LSM2,SSRP1,POLR2D,CWC15,CDK12,CTR9,ELL,PPIE,TGFBR1,NELFB,SUPT16H,LSM7,ISY1,RTF1,CDC5L,PRPF19,SEPHS1,RBM22,ASB11,CDC73,EP300,TP53,SF3B6,CCNK,NELFCD,CRNKL1,UNC119,NELFA,MTA1,HNRNPUL1,SF3B5,PAF1,FTSJ3,LUC7L2,SUMO1,EGLN1,DDX39A,LRIF1,PUF60,NELFE,FAM69B,CPSF3,CCNT1,DDX23	-0.670465	-0.17054	56	160
DOLICHYL-DIPHOSPHOOLIGOSACCHARIDE BIOSYNTHESIS	DOLICHYL-DIPHOSPHOOLIGOSACCHARIDE BIOSYNTHESIS	0.99612	0.997979	1	PIN1,HSPA8,TUBB6,EEF1A2,HSPH1,TUBA1A,RCHY1,ENO3,TUBB,TUBB4B,HSP90AA1,ARAF,SMPD1,ERGIC3,RPL4,RER1,NFKB1,ILK,PPAT,CNBP,PBDC1,PPP5C,EARS2,RPSA,HSP90AB1,CUL3,RUVBL2,RPS6KB2,MAX,MOCS3,GLTSCR2,GPI,POLR2L,HUWE1,POMK,HSPA2,UBA1,RPF2,NEDD8,ACO2,PRKACA,TUBB2A,HSPA6,ALG1,POLR2C,NAE1,TUBB8,HSPA5,TCEA1	0.72419	0.166212	49	160
GLUTAMATE DEPENDENT ACID RESISTANCE	GLUTAMATE DEPENDENT ACID RESISTANCE	0.997911	0.997979	1	HSPA8,EEF2,GCFC2,NAP1L1,EIF4G1,ENO3,ARRB1,EIF3B,DDX5,PPP2R1A,VDAC1,TMEM159,GSPT1,ACTA2,PABPC1,YBX1,YKT6,ARPC4,SNCA,CNBP,PFKP,MAT2A,VCP,DNAJA1,LSM3,SLC25A6,PPP5C,EIF6,EEF1G,PGD,PSMD4,CSNK2B,DNM2,NAPA,HSPA9,FYN,HNRNPK,EIF4A1,SEC22B,UBA52,TUFM,ATP5A1,ACTR3,YWHAE,POLR2L,SLC25A4,ACTA1,ARCN1,HSPA2,UBA1,HSF1,NPEPPS,PRKACA,HSPA6,RAN,CDK2,SHMT1,ACTR2,POLR2C,DNAJB1,PAPOLA,VDAC2	0.743009	0.165639	62	199
SELENOCYSTEINE BIOSYNTHESIS II (ARCHAEA AND EUKARYOTES)	SELENOCYSTEINE BIOSYNTHESIS II (ARCHAEA AND EUKARYOTES)	0.997949	0.997979	1	CRMP1,KPNA2,HSPA8,HSPH1,ABCF3,CPPED1,SIRT2,MVD,SEPT5,SQSTM1,TNIK,PPP2R1A,LZTFL1,PEF1,SPATA20,YBX1,PPAT,CNBP,VPS4A,RIOK3,MAT2A,VCP,DMWD,SARS2,COPG1,KPNA4,NEK7,ATAD3A,PSMD4,CSNK2B,PFDN6,HSP90AB1,CUL3,SLC35F6,CCT7,PSMA7,NOB1,EIF4A2,RBMS1,MAX,USP10,EIF4A1,TUFM,KCMF1,CCT4,PNO1,HSPA2,CCT3,WARS,PRKACA,CCT8,UBA5,PSMA6,HSPA6,EIF1B,CDK2,SLC25A3	0.735774	0.165165	57	187
PROTEIN CITRULLINATION	PROTEIN CITRULLINATION	0.997979	0.997979	1	DYRK2,SETD7,PIN1,HSPA8,SMYD2,RCHY1,PTEN,NUAK1,TADA3,DDX5,HSP90AA1,NDN,SMAD2,YWHAB,TP53RK,OTUB1,JMY,TAF9B,BCL2L1,RPL11,YBX1,MAPK1	0.729874	0.165	22	180
