# Supplementary material for: Multi-Omics Profiling of Hypertrophic Cardiomyopathy Reveals Altered Mechanisms in Mitochondrial Dynamics and Excitation–Contraction Coupling
Source: Int J Mol Sci. 2023 Mar 1;24(5):4724. doi: 10.3390/ijms24054724 (PMC10002553; doi:10.3390/ijms24054724)
Supplement: Supplementary file 1 [file ijms-24-04724-s001.zip › Supp_Table_S6.xlsx]

## Sheet: pos
	Normalized Log2 Intensity, Row Z Score																			X403_HCM-WT				Normalized Log2 Intensity
FEATURE	X319_WT	X320_WT	X325_WT	X327_WT	X331_WT	X404_WT	X414_WT	X319_403	X320_403	X325_403	X327_403	X331_403	X404_403	X414_403	MZ	RT	FORMULA	MS.MS.ASSIGNED	MAXFC	P.VALUE	ADJ.P.VAL	LOGFC	IDENTIFIER	X319_WT.1	X320_WT.1	X325_WT.1	X327_WT.1	X331_WT.1	X404_WT.1	X414_WT.1	X319_403.1	X320_403.1	X325_403.1	X327_403.1	X331_403.1	X404_403.1	X414_403.1
X5068	-0.732428	-0.720795	-1.1904	-1.09141	-1.08706	-0.871729	-0.934385	0.870449	0.784217	1.13574	0.614159	1.01357	1.18179	1.02828	130.049	2.976	C5H9NO4	True	2.19867	3.87983e-09	0.000172905	2.19867	L-Glutamate|C00025	16.8203	16.8338	16.2886	16.4036	16.4086	16.6586	16.5859	18.6813	18.5812	18.9893	18.3837	18.8474	19.0427	18.8645
X6533	-0.735403	-0.73111	-1.36158	-1.23397	-0.723498	-0.906281	-0.905655	0.87637	0.770384	1.18448	0.744974	0.930833	1.12309	0.96736	147.076	2.942	C5H10N2O3	True	1.85594	2.54883e-08	0.000567944	1.85594	2-(2-aminopropanamido)acetic acid	18.0474	18.0517	17.4309	17.5566	18.0592	17.8792	17.8798	19.6344	19.53	19.9377	19.505	19.688	19.8773	19.724
X72232	-0.761079	-0.836859	-1.38268	-1.00955	-0.412258	-0.49274	-1.45997	0.724047	0.856464	1.19929	1.08196	1.00217	0.383489	1.10772	687.298	18.994	C36H53Cl3O6	False	4.00581	1.17086e-07	0.00103776	4.00581	30,30,34-trichlorocylindrocyclophane A	9.56897	9.40179	8.19763	9.02081	10.3385	10.161	8.02712	12.8454	13.1375	13.8938	13.635	13.459	12.0941	13.6918
X55361	-0.922593	-0.550572	-0.726724	-0.969725	-0.717362	-0.98722	-1.54533	0.786786	1.00598	1.31393	1.2536	0.828039	0.868011	0.363189	533.268	19.98	C28H40N2O6S	False	2.45497	1.19657e-07	0.00103776	2.45497	SC 98A	15.6517	16.1496	15.9139	15.5886	15.9264	15.5652	14.8182	17.9397	18.233	18.6452	18.5645	17.9949	18.0484	17.3727
X5087	-0.380451	-0.607698	-1.31709	-1.28985	-0.933382	-0.984226	-0.916672	0.386427	0.804027	1.24883	0.89612	0.942003	1.22781	0.924158	130.05	2.891	C5H9NO4	True	2.31149	1.26743e-07	0.00103776	2.31149	L-Glutamate|C00025	16.9699	16.6839	15.7913	15.8256	16.2741	16.2101	16.2952	17.9349	18.4603	19.02	18.5762	18.634	18.9936	18.6115
X69135	-0.857456	-0.486906	-1.07801	-0.620197	-1.59864	-0.558292	-1.17587	0.759951	0.467691	1.3091	1.05537	1.04328	0.820301	0.919683	653.301	22.509	C29H42N8O8	False	2.97345	1.39718e-07	0.00103776	2.97345	Boc-Gln-Ala-Arg-7-amido-4-methylcoumarin hydrochloride	19.6136	20.2184	19.2535	20.0009	18.4037	20.1019	19.0938	22.2538	21.7767	23.1502	22.736	22.7163	22.3523	22.5145
X64552	-0.658779	-0.921687	-1.29675	-0.888717	-0.595507	-0.929722	-1.01595	0.100938	0.546642	1.43192	1.18243	0.954258	1.30987	0.781058	609.99	21.549	C19H19N3O12S4	False	4.75212	2.02257e-07	0.00119331	4.75212	2-Naphthalenesulfonic acid, 6-(methylamino)-5-[[2-sulfo-4-[[2-(sulfooxy)ethyl]sulfonyl]phenyl]azo]-	11.4587	10.7654	9.77627	10.8523	11.6255	10.7442	10.5168	13.4621	14.6375	16.972	16.3141	15.7124	16.6502	15.2556
X46770	-0.410808	-0.846407	-0.438848	-1.06964	-1.27654	-0.992498	-1.27484	0.149046	1.25084	0.926271	1.24489	1.07343	0.781518	0.883586	465.226	20.899	C27H30N4O2	False	4.26667	2.14214e-07	0.00119331	4.26667	communesin D	15.8046	14.7737	15.7383	14.2453	13.7556	14.4279	13.7597	17.1297	19.7374	18.9692	19.7233	19.3175	18.6266	18.8682
X25440	-0.4996	-0.885353	-0.587045	-0.906835	-1.26931	-1.49773	-0.746443	0.901305	1.08429	1.05402	0.583351	1.32101	1.00244	0.445907	304.181	20.555	C20H21N3	False	2.22292	2.43378e-07	0.00120513	2.22292	1,2,3,4,4a,5,14,14a-octahydro-5,14-ethano-indolo[2',3':3,4]pyrido[1,2-g][1,6]naphthyridine	16.7752	16.3057	16.6688	16.2796	15.8384	15.5604	16.4748	18.4803	18.703	18.6662	18.0933	18.9911	18.6034	17.926
X73833	-0.961881	-0.56986	-0.468104	-1.24423	-0.50591	-1.37021	-1.24701	0.653642	0.873305	0.936616	1.49812	0.801774	0.96614	0.637609	708.361	19.94	C36H53NO13	False	2.33149	2.90253e-07	0.00129351	2.33149	Lucensomycin	13.0679	13.5703	13.7007	12.706	13.6523	12.5446	12.7025	15.1383	15.4199	15.501	16.2206	15.3282	15.5388	15.1178
X35020	-0.406738	-1.26066	-0.652099	-1.21107	-0.418812	-1.24101	-1.14961	0.918893	1.36642	1.16062	0.59092	0.978605	0.470285	0.854254	375.211	20.739	C17H30N2O7	False	2.47867	3.47139e-07	0.00140639	2.47867	bengamide Y	15.1377	13.9692	14.8019	14.0371	15.1212	13.9961	14.1212	16.9516	17.564	17.2824	16.5028	17.0333	16.3377	16.8632
X6532	-0.595579	-0.669528	-1.42055	-1.38963	-0.422903	-1.03645	-0.870788	0.646443	0.735543	1.26627	0.923125	0.724237	1.24457	0.865245	147.076	2.878	C5H10N2O3	True	1.82797	4.4679e-07	0.00165927	1.82797	2-(2-aminopropanamido)acetic acid	17.9371	17.8633	17.1131	17.144	18.1096	17.4968	17.6622	19.1777	19.2667	19.7968	19.454	19.2554	19.7751	19.3962
X35022	-0.381373	-1.10416	-0.873531	-1.33437	-0.29856	-0.996934	-1.30486	0.801908	1.24407	1.34349	0.818973	0.862584	0.339328	0.883429	375.212	20.794	C17H30N2O7	False	2.62924	5.34543e-07	0.00173145	2.62924	bengamide Y	15.335	14.2782	14.6154	13.9416	15.456	14.4349	13.9847	17.0651	17.7116	17.8569	17.09	17.1538	16.3887	17.1843
X36909	-0.815213	-0.333643	-0.904745	-0.449348	-0.658699	-1.58393	-1.53729	0.950119	0.509179	1.00294	1.02508	0.875946	1.1459	0.773707	390.223	21.114	C16H29N7O3	False	2.78373	5.43931e-07	0.00173145	2.78373	N~5~-(Diaminomethylidene)-L-ornithyl-L-prolyl-L-prolinamide	15.7409	16.4877	15.602	16.3082	15.9836	14.5488	14.6211	18.4784	17.7947	18.5603	18.5947	18.3634	18.782	18.2049
X33987	-0.603049	-0.558686	-0.925877	-0.814488	-0.85938	-1.1826	-1.40305	0.155569	0.631705	1.37047	1.02849	1.11651	0.988176	1.05622	367.202	20.083	C22H23NO3	False	2.01206	5.98287e-07	0.00177751	2.01206	Fenpropathrin|C18411	14.9865	15.0358	14.6284	14.7519	14.7021	14.3435	14.0989	15.8282	16.3565	17.1762	16.7967	16.8944	16.752	16.8275
X72101	-1.4206	-0.415245	-0.229616	-0.997372	-0.878051	-0.593414	-1.66048	0.671237	0.833097	1.01464	1.19046	1.06071	0.438048	0.986587	685.397	19.993	C34H63ClN2O6S	False	3.96643	9.61581e-07	0.0026783	3.96643	Clindamycin palmitate|C21594	11.2734	13.5264	13.9424	12.2219	12.4893	13.1271	10.7358	15.9612	16.3239	16.7308	17.1248	16.834	15.4386	16.6679
X6530	-0.939095	-0.774116	-1.30571	-1.34059	-0.0543448	-0.982558	-0.984681	1.1404	0.731109	0.955659	0.636985	0.734945	1.13581	1.04619	147.076	3.006	C5H10N2O3	True	1.55924	1.23948e-06	0.00324628	1.55924	2-(2-aminopropanamido)acetic acid	18.0228	18.1639	17.7092	17.6794	18.7794	17.9856	17.9838	19.8012	19.4512	19.6432	19.3707	19.4544	19.7973	19.7206
X52845	-0.747864	-0.826172	-0.811133	-1.14354	-1.14061	-0.702548	-0.855269	0.117721	0.66007	1.3651	1.64969	1.22485	0.606396	0.60331	513.256	20.522	C26H38N2O7	False	2.4207	1.32946e-06	0.00324628	2.4207	Schizanthine E	15.4437	15.3372	15.3576	14.9054	14.9093	15.5054	15.2976	16.6214	17.3593	18.3185	18.7057	18.1277	17.2863	17.2821
X35023	-0.438063	-0.209899	-0.943685	-1.17922	-0.455039	-1.56285	-1.41252	0.736286	0.773447	1.40901	0.936295	0.772792	0.766966	0.806484	375.212	20.905	C17H30N2O7	False	2.71028	1.40928e-06	0.00324628	2.71028	bengamide Y	15.256	15.605	14.4826	14.1223	15.2301	13.5355	13.7654	17.0524	17.1093	18.0815	17.3584	17.1083	17.0993	17.1598
X48355	-0.98329	-0.45728	-0.690064	-0.474212	-0.959701	-0.908774	-1.69138	0.0430601	0.779405	1.39034	0.979719	1.09306	1.10198	0.777135	477.261	21.102	C28H38O5	False	3.57546	1.45687e-06	0.00324628	3.57546	15-[1-(4,5-dimethyl-6-oxo-3,6-dihydro-2H-pyran-2-yl)ethyl]-5-hydroxy-10,14-dimethyl-3-oxapentacyclo[9.7.0.0??,?.0?,???.0???,???]octadec-7-en-9-one	13.1714	14.2391	13.7666	14.2048	13.2193	13.3226	11.734	15.2548	16.7496	17.9898	17.1562	17.3863	17.4044	16.745
X72762	-1.33585	-1.34919	-0.0522234	-0.564514	-0.819633	-0.60101	-1.42886	0.619442	1.45712	0.892098	0.552113	0.987217	0.638943	1.00435	694.332	20.59	C36H45N7O6	False	3.78578	1.59285e-06	0.00338024	3.78578	tryptophyllin L 1.3	10.2686	10.2399	13.0336	11.9301	11.3806	11.8515	10.0683	14.4804	16.2848	15.0677	14.3354	15.2726	14.5224	15.3095
X48354	-0.751573	-0.822652	-0.299741	-0.708736	-1.28545	-0.740564	-1.59802	0.425557	1.32902	1.15588	0.997473	1.23778	0.392066	0.668961	477.26	20.95	C28H38O5	False	2.36834	1.70865e-06	0.00346118	2.36834	15-[1-(4,5-dimethyl-6-oxo-3,6-dihydro-2H-pyran-2-yl)ethyl]-5-hydroxy-10,14-dimethyl-3-oxapentacyclo[9.7.0.0??,?.0?,???.0???,???]octadec-7-en-9-one	14.897	14.802	15.5004	14.9542	14.184	14.9117	13.7665	16.469	17.6756	17.4444	17.2328	17.5538	16.4243	16.7941
X72763	-1.21705	-0.159543	-0.626635	-0.549012	-0.730681	-1.29648	-1.54869	0.37932	0.349406	1.2399	0.941484	1.06291	1.22653	0.928545	694.332	20.793	C36H45N7O6	False	3.86963	1.98068e-06	0.00371205	3.86963	tryptophyllin L 1.3	11.8477	14.1849	13.1526	13.3241	12.9226	11.6722	11.1147	15.3758	15.3097	17.2778	16.6183	16.8866	17.2483	16.5897
X35599	-0.460383	-0.760075	-0.516715	-1.20566	-1.10293	-1.42942	-0.704317	0.437296	1.15906	1.25238	1.35975	1.15894	0.639563	0.172503	380.22	19.586	C22H31NO3	False	2.50851	1.99908e-06	0.00371205	2.50851	Oxybutynin|C07360	19.1687	18.7429	19.0887	18.1098	18.2558	17.7919	18.8221	20.4441	21.4696	21.6022	21.7547	21.4694	20.7315	20.0679
X35605	-0.614599	-0.966439	-0.669029	-0.902137	-1.30197	-0.914369	-0.861304	0.340822	1.19778	1.53441	1.18758	1.0959	0.794314	0.0790353	380.221	19.631	C22H31NO3	False	1.9161	2.31906e-06	0.00385667	1.9161	Oxybutynin|C07360	19.4376	19.0589	19.379	19.1281	18.6977	19.1149	19.1721	20.4661	21.3886	21.751	21.3777	21.279	20.9543	20.1843
X13754	1.35676	1.01597	-0.0229162	0.303461	1.14748	1.01797	1.26003	-1.19872	-0.570342	-0.489986	-0.382179	-1.08024	-1.18585	-1.17142	216.944	6.924	C4H8O2S4	False	10.0111	2.36407e-06	0.00385667	-10.0111	5-thioxo-2,4,6-trithiaheptane 2,2-dioxide	17.7372	15.7728	9.78453	11.6658	16.5309	15.7843	17.1796	3.00699	6.62908	7.09227	7.71369	3.68994	3.08121	3.16436
X46772	-0.439474	-0.946431	-0.265773	-1.19352	-1.38678	-0.728488	-1.14791	0.213657	1.37593	0.815652	1.33373	1.21623	0.334314	0.818864	465.226	20.844	C27H30N4O2	False	3.8328	2.42051e-06	0.00385667	3.8328	communesin D	15.7392	14.6258	16.1206	14.0832	13.6588	15.1045	14.1834	17.1735	19.726	18.4956	19.6333	19.3753	17.4385	18.5026
X21597	-1.24959	-1.25137	-1.20996	-0.183687	-0.923619	-0.613144	-0.878738	1.30837	0.884755	1.40362	0.833517	0.616611	0.49742	0.765832	277.179	48.998	C18H24N	True	1.55398	2.42313e-06	0.00385667	1.55398	BENZYL-[(4-TERT-BUTYLPHENYL)METHYL]AZANIUM	17.9563	17.9548	17.9905	18.875	18.2373	18.5049	18.276	20.1611	19.796	20.2432	19.7518	19.5649	19.4621	19.6935
X31987	-1.21639	-0.759767	-0.391538	0.0709059	-0.841722	-1.58278	-1.36176	0.795365	0.473652	1.29969	0.686899	0.958664	0.804815	1.06397	351.23	21.535	C22H32O2	False	4.62573	2.7561e-06	0.00388677	4.62573	(4Z,7Z,10Z,13Z,16Z,19Z)-Docosahexaenoic acid|C06429	9.41737	10.6327	11.6127	12.8435	10.4146	8.44224	9.03049	14.7717	13.9154	16.1139	14.483	15.2063	14.7968	15.4866
X40359	-0.909449	-0.387071	-0.485547	-0.424365	-0.830693	-1.28138	-1.78994	0.25231	0.641644	1.2654	1.20207	1.05871	0.88734	0.800964	417.251	19.997	C25H34N2O2	False	3.27377	2.7645e-06	0.00388677	3.27377	Aminacrine undecylate	12.6529	13.6328	13.4481	13.5628	12.8006	11.9552	11.0013	14.8321	15.5625	16.7325	16.6137	16.3448	16.0233	15.8613
X74737	-0.586347	-1.09515	-0.807786	-1.06985	-0.520801	-0.369974	-1.64762	0.306622	1.06597	0.951913	1.09908	1.09394	0.178595	1.40141	721.352	20.085	C48H48O6	True	3.66414	2.77707e-06	0.00388677	3.66414	p-Methylcalix[6]arene	11.2259	10.1558	10.7602	10.209	11.3637	11.681	8.99379	13.104	14.7011	14.4612	14.7707	14.7599	12.8347	15.4066
X61417	1.4768	1.2998	0.507977	0.850611	0.740974	0.209497	0.978479	-1.37706	-1.07229	-1.31571	-0.701957	-0.00390719	-0.967719	-0.625496	583.334	34.741	C31H48N2O7	False	8.30017	2.79091e-06	0.00388677	-8.30017	(17R,2S)-11t'-(3-dimethylamino-beta-D-xylo-3,4,6-trideoxy-hexopyranosyloxy)-2r',3t'-epoxy-5t'-ethyl-9t'-hydroxy-15c,2,4c',10c'-tetramethyl-(17rH)-16,7-dihydro-15H-6-oxa-1(3,7)-[2]pyrindina-cycloundecaphan-7-one	17.1662	16.3182	12.525	14.1664	13.6411	11.0951	14.7789	3.49457	4.95461	3.7885	6.7287	10.0727	5.45554	7.09499
X11882	-1.52538	-1.43367	-0.214314	-0.582837	-0.647569	-1.12527	-0.71466	1.18731	1.08556	0.472562	1.19018	0.848618	0.836317	0.623143	200.2	48.067	C12H25NO	True	1.67339	3.19712e-06	0.00413015	1.67339	(2R,3S)-clavaminol B	17.8245	17.9106	19.0544	18.7087	18.648	18.1999	18.585	20.3692	20.2737	19.6987	20.3718	20.0514	20.0399	19.8399
X54843	0.780192	0.527547	0.950353	0.736751	0.558015	1.1406	1.59906	-0.920632	-0.580511	-1.18404	-0.999532	-0.393168	-0.716642	-1.49799	529.229	22.755	C27H30F6N2O2	False	1.50894	3.20957e-06	0.00413015	-1.50894	(1S,2R,7R,10S,11S,14S,15S)-N-[2,5-bis(trifluoromethyl)phenyl]-2,15-dimethyl-5-oxo-6-azatetracyclo[8.7.0.0??,?.0????,???]heptadec-3-ene-14-carboxamide	14.547	14.3349	14.6898	14.5105	14.3605	14.8494	15.2342	13.1195	13.4049	12.8984	13.0532	13.5622	13.2907	12.6349
X55360	-0.332417	-0.842876	-0.150702	-1.30051	-0.560681	-1.42194	-1.51256	0.464349	1.23739	0.92606	1.21387	0.740922	0.8914	0.647691	533.268	19.882	C28H40N2O6S	False	2.5568	3.32254e-06	0.00413015	2.5568	SC 98A	16.1837	15.4375	16.4493	14.7685	15.85	14.591	14.4585	17.3484	18.4784	18.0233	18.4441	17.7527	17.9727	17.6164
X61757	-0.93406	-0.623989	-0.362208	-1.34598	-1.48527	-0.962292	-0.370244	0.73522	1.11646	1.19801	1.18867	1.22419	-0.00486447	0.626352	586.26	19.822	C25H37N7O8	False	3.23392	3.50275e-06	0.00413015	3.23392	N-Acetyl-L-alanyl-L-seryl-L-prolyl-N-(4-nitrophenyl)-L-lysinamide	14.9831	15.56	16.047	14.2168	13.9577	14.9306	16.0321	18.0887	18.7979	18.9496	18.9322	18.9983	16.7118	17.8861
X23991	-1.43635	-1.2421	-1.0712	-0.109224	-1.01866	-0.596993	-0.760268	1.38627	0.859737	1.34787	0.752661	0.696334	0.48818	0.703741	294.205	48.998	C15H29NO3	True	1.66317	3.524e-06	0.00413015	1.66317	2-tridecanamidoacetic acid	17.7784	17.9597	18.1193	19.0175	18.1684	18.5621	18.4096	20.4137	19.9221	20.3779	19.8222	19.7696	19.5752	19.7765
X42876	-0.644992	-0.612283	-0.572015	-0.750648	-0.566071	-1.5899	-1.42037	0.449328	0.619397	1.42474	1.24894	0.977385	0.33716	1.09932	435.76	21.262	C9H6Br3NOS	False	2.0783	3.62005e-06	0.00413015	2.0783	3-methylsulfinyl-2,4,6-tribromoindole	13.448	13.4866	13.5342	13.3231	13.5412	12.3315	12.5318	14.741	14.9419	15.8935	15.6858	15.3649	14.6084	15.509
X59289	0.954957	0.562579	1.19961	1.34564	0.267421	0.980909	0.781057	-1.40108	0.00272446	-0.804182	-1.41242	-1.20588	-0.709916	-0.561413	564.82	20.071	C15H20Br4O3	False	2.91867	3.62616e-06	0.00413015	-2.91867	(2S,3R,5R)-2-[(R)-bromo[(2R,3R,5S,6R)-3,5-dibromo-6-ethyloxan-2-yl]methyl]-5-[(1R)-1-bromoprop-2-yn-1-yl]oxolan-3-ol	15.0168	14.3589	15.4271	15.6719	13.864	15.0604	14.7252	11.0662	13.4201	12.0671	11.0472	11.3935	12.2252	12.4742
X36911	-0.336599	-1.13551	-0.379047	-1.16538	-0.309267	-1.40104	-1.39156	0.624078	1.06845	1.36283	1.26784	0.52145	0.740861	0.532887	390.223	20.954	C16H29N7O3	False	2.43084	3.70874e-06	0.00413015	2.43084	N~5~-(Diaminomethylidene)-L-ornithyl-L-prolyl-L-prolinamide	15.6665	14.5556	15.6075	14.5141	15.7045	14.1864	14.1995	17.0024	17.6203	18.0296	17.8976	16.8597	17.1648	16.8756
X17136	-0.0118152	-1.08823	-1.38135	-0.19444	-1.18536	-0.883019	-1.28931	0.167376	1.11804	1.3308	0.709271	0.842546	0.831522	1.03398	244.128	20.755	C9H15N7	False	7.25657	3.79975e-06	0.00413015	7.25657	Guanidine, ((2,6-pyridylidene)dimethylene)di-	10.6319	6.10075	4.86686	9.86315	5.69188	6.96459	5.25434	11.3862	15.388	16.2836	13.6673	14.2283	14.1819	15.0341
X49501	-0.442005	-0.314751	-0.875373	-0.965328	-0.587975	-1.38842	-1.45434	0.245162	0.215673	1.2118	1.30983	0.976905	0.692526	1.37631	486.339	21.096	C28H49NO2S	False	5.22033	4.34121e-06	0.00460634	5.22033	4-Benzyl-3-heptadecyl-1lambda~6~,4-thiazinane-1,1-dione	10.4203	10.806	9.10678	8.83413	9.97787	7.55176	7.35194	12.5031	12.4137	15.4329	15.73	14.7209	13.859	15.9315
X20463	0.659065	0.741887	1.3991	1.31974	1.36538	-0.0656613	0.627102	-0.0657551	-1.02879	-1.16462	-0.849321	-1.12392	-0.956493	-0.85772	269.116	49.326	C12H17ClN4O	True	3.40288	4.66608e-06	0.00483591	-3.40288	2-[(E)-(4-Methoxyphenyl)diazenyl]-1,3-dimethyl-2,3-dihydro-1H-imidazol-1-ium chloride	14.6736	14.8368	16.1313	15.975	16.0649	13.2461	14.6107	13.246	11.3491	11.0815	11.7026	11.1617	11.4915	11.686
X54538	-0.655734	-0.280625	-0.954487	-0.649896	-1.28434	-1.3914	-0.867063	0.69224	0.555353	1.5367	0.837773	1.60897	0.51967	0.332842	527.241	19.189	C24H36N6O4S	False	2.4554	4.92512e-06	0.00497491	2.4554	Bis(1H-benzimidazole-1-pentylammonium) sulphate	14.8355	15.3654	14.4134	14.8437	13.9475	13.7962	14.5369	16.7397	16.5463	17.9326	16.9453	18.0347	16.4959	16.232
X10901	1.67559	1.44479	-0.0108466	0.386715	1.28574	0.330861	0.893909	-0.946974	-1.11873	-0.703266	-0.610789	-0.814883	-1.09548	-0.716635	192.065	37.483	C5H10ClN5O	False	5.36542	5.1909e-06	0.00497491	-5.36542	2,6-Diamino-5-(methylamino)pyrimidin-4(1H)-one--hydrogen chloride (1/1)	16.818	16.0964	11.5457	12.7886	15.5992	12.614	14.3742	8.61904	8.08209	9.38095	9.67006	9.032	8.15476	9.33916
X52299	-1.15035	-0.188106	-0.289675	-2	-0.752559	-0.924328	-0.66794	0.835231	0.929729	0.570531	1.32607	0.925449	0.745417	0.681953	509.245	19.985	C25H32N8O2S	False	4.46057	5.21773e-06	0.00497491	4.46057	Pteridine, 4,7-di-4-morpholinyl-6-((phenylmethyl)thio)-2-(1-piperazinyl)-	9.14484	11.6426	11.379	6.83181	10.1774	9.73154	10.3971	14.299	14.5443	13.6119	15.5731	14.5332	14.0658	13.9011
X55480	-0.343429	-0.735623	-0.497874	-1.22841	-1.46467	-0.939159	-0.833404	0.0460537	0.789992	1.45154	1.30205	1.25265	0.868684	0.331596	534.27	20.268	C29H35N5O5	False	3.046	5.33173e-06	0.00497491	3.046	Ergobutine	16.7721	16.0801	16.4996	15.2107	14.7939	15.721	15.9076	17.4592	18.7718	19.939	19.6752	19.5881	18.9106	17.963
X33986	-0.762448	-0.398186	-0.728732	-0.590659	-0.788307	-1.09079	-1.78929	0.228213	0.386508	1.16116	0.956359	1.07649	1.11015	1.22952	367.201	20.138	C22H28N2O4	False	1.82394	5.35837e-06	0.00497491	1.82394	16-Methoxy-2,3-dihydro-3-hydroxytabersonine|C04578	14.8629	15.2412	14.898	15.0413	14.8361	14.522	13.7968	15.8915	16.0559	16.8602	16.6476	16.7723	16.8072	16.9312
X46047	-1.05726	-0.480282	-0.668399	-0.670154	-0.404625	-0.546593	-2	0.691325	0.857694	1.22594	0.882862	0.802014	0.560351	1.0049	460.235	20.076	C21H35N5O3S	False	3.45604	5.54276e-06	0.00504108	3.45604	Morpholine, 4-((4,6-bis(1-methyl-4-piperidinyl)oxy)-5-(methylthio)-2-pyrimidinyl)-	14.3658	15.5241	15.1465	15.1429	15.676	15.391	12.076	17.8763	18.2103	18.9496	18.2608	18.0985	17.6133	18.5058
X48726	-0.600947	-1.26962	-0.464049	-0.519243	-1.31943	-1.05648	-0.936492	-0.143318	1.02134	0.82907	1.11485	1.33108	1.09509	0.918146	480.25	21.603	C22H39N3O5S	False	1.69482	5.76312e-06	0.00511109	1.69482	Sch 382582	15.7736	15.1303	15.9053	15.8522	15.0824	15.3353	15.4508	16.2138	17.3342	17.1492	17.4241	17.6322	17.4051	17.2349
X56613	-1.13479	-0.879072	-0.238759	-1.18584	-1.39043	-0.893273	-0.274724	0.785857	1.23183	0.804379	1.39966	1.08227	0.854948	-0.162063	543.258	21.177	C30H38O9	False	4.66622	5.93917e-06	0.00511109	4.66622	16-[1-(4,5-dimethyl-6-oxo-3,6-dihydro-2H-pyran-2-yl)ethyl]-6,12-dihydroxy-2,17-dimethyl-3-oxo-8,15-dioxahexacyclo[9.8.0.0??,?.0?,?.0????,???.0???,???]nonadec-4-en-13-yl acetate	13.4745	14.1709	15.9147	13.3354	12.7782	14.1322	15.8167	18.7051	19.9196	18.7555	20.3767	19.5123	18.8932	16.1235
X53049	0.0299682	-0.693323	-1.9886	-0.651792	-1.04191	-0.527367	-1.12299	0.490024	0.758215	1.20394	0.716155	0.724135	1.05472	1.04883	514.933	20.539	C17H19Br2ClN2O3	False	4.70249	5.9638e-06	0.00511109	4.70249	(2Z,4S)-2-[({2-[4-(3-aminopropoxy)-3,5-dibromophenyl]ethyl}amino)methylidene]-4-chlorocyclopentane-1,3-dione	12.4338	10.4484	6.89295	10.5624	9.49156	10.904	9.269	13.6966	14.4328	15.6563	14.3174	14.3393	15.2467	15.2305
X68180	-1.30601	-0.0542892	-0.144305	-1.63295	-0.54024	-0.780801	-1.52773	0.669498	0.709193	0.797217	1.05669	0.754075	0.77926	1.22039	643.856	21.007	C20H18Br3NO7	False	5.53501	6.1216e-06	0.00514734	5.53501	methyl 1-(2-(2,3-dibromo-4,5-dihydroxybenzyl)-3-bromo-4,5-dihydroxybenzyl)-5-oxopyrrolidine-2-carboxylate	8.31365	12.3644	12.0731	7.2556	10.7918	10.0133	7.59613	14.7066	14.8351	15.12	15.9596	14.9803	15.0618	16.4894
X55481	-0.451889	-0.555358	-0.595132	-1.04043	-1.43867	-1.18859	-0.752778	0.0787519	0.566156	1.45288	1.1843	1.2037	1.28388	0.253176	534.27	20.325	C29H35N5O5	False	2.98397	6.40938e-06	0.0052234	2.98397	Ergobutine	16.8437	16.6643	16.5953	15.8231	15.1326	15.5662	16.3219	17.7638	18.609	20.1466	19.6809	19.7145	19.8536	18.0663
X34523	-0.571512	-0.977385	-1.02429	-1.15707	-1.09959	-0.604882	-0.586806	0.211	0.824296	2	1.10454	0.88385	0.477301	0.459888	371.233	22.279	C22H27NO3	False	2.88983	6.691e-06	0.0052234	2.88983	Spiredine|C08711	15.2601	14.5784	14.4996	14.2766	14.3731	15.2041	15.2344	16.5745	17.6047	19.6814	18.0754	17.7047	17.0218	16.9926
X21644	-1.83006	-1.18093	-0.403759	-0.601759	-0.8984	-0.810299	-0.522309	1.35034	0.978159	0.721995	1.09273	0.682826	0.816916	0.604549	277.236	47.562	C14H30N4	True	1.38332	6.72194e-06	0.0052234	1.38332	1,4,8,11-Tetraazabicyclo[9.5.2]octadecane	17.395	17.898	18.5003	18.3468	18.117	18.1852	18.4084	19.8597	19.5712	19.3727	19.66	19.3424	19.4463	19.2817
X65983	-1.10582	-1.11175	-1.48851	-0.164664	-1.06185	-0.464063	-0.576717	1.52465	0.769426	1.23839	0.968567	0.694915	-0.085366	0.862795	623.277	18.574	C25H42N4O14	False	5.82481	6.72834e-06	0.0052234	5.82481	Allosamidine|C05346	6.36831	6.34809	5.06223	9.58045	6.51839	8.55861	8.17413	15.346	12.7684	14.369	13.4481	12.5141	9.85109	13.0871
X75705	-1.52316	-0.521776	-0.243886	-0.309093	-1.0052	-0.615754	-1.78462	0.400361	0.848734	1.09774	1.18361	1.10627	0.55335	0.813414	735.376	20.666	C43H50N4O7	True	3.31596	6.84445e-06	0.0052234	3.31596	3'-Hydroxyvobtusine	12.4654	14.4012	14.9384	14.8124	13.4667	14.2196	11.9599	16.1839	17.0507	17.5321	17.6981	17.5486	16.4797	16.9824
X44753	-1.4997	-0.385484	-0.833926	-0.786159	-1.59648	-0.589837	-0.329774	1.12992	0.532792	1.17491	1.32826	1.12657	0.511676	0.217233	450.268	20.442	C19H41NO9	False	2.80524	6.91531e-06	0.0052234	2.80524	2,5,8,11,14,17,20,23,26-Nonaoxaoctacosan-28-amine	17.7053	19.5221	18.7909	18.8688	17.5475	19.1889	19.6129	21.9931	21.0194	22.0664	22.3165	21.9876	20.985	20.5049
X20449	0.751992	0.684875	1.37234	1.27603	1.29743	-0.236332	0.845622	-0.183671	-1.02247	-1.20033	-0.900692	-1.03789	-0.48066	-1.16625	269.116	49.383	C11H25OPS2	True	3.42509	7.33403e-06	0.00544735	-3.42509	S-Butyl S-hexyl methylphosphonodithioate	15.0058	14.8715	16.2469	16.0542	16.0971	13.0285	15.1931	13.1339	11.4558	11.0999	11.6994	11.4249	12.5397	11.1681
X46050	-0.484159	-1.1918	-0.106324	-1.326	-0.456557	-0.741904	-1.72365	0.696356	1.28843	0.945072	1.16118	0.940791	0.304788	0.693783	460.236	19.985	C29H31N3O	False	2.40139	7.8309e-06	0.00572105	2.40139	Benzeneacetamide, N-(1-(2-(1H-indol-3-yl)ethyl)-4-piperidinyl)-alpha-phenyl-	16.524	15.5377	17.0506	15.3507	16.5625	16.1648	14.7965	18.1693	18.9945	18.516	18.8172	18.51	17.6236	18.1658
X28035	-0.585888	-0.770975	-0.466871	-0.45866	-0.708184	-1.43972	-1.58457	0.0353448	0.429808	1.13422	1.40914	1.02286	0.795145	1.18836	322.168	21.404	C17H24ClN3O	False	2.54717	8.1586e-06	0.00586432	2.54717	1,2-Ethanediamine, N-[(4-methoxyphenyl)methyl]-N',N'-dimethyl-N-2-pyridinyl-, monohydrochloride	14.4324	14.158	14.6088	14.6209	14.2511	13.1668	12.9522	15.3531	15.9378	16.9819	17.3894	16.8168	16.4793	17.0621
X73839	-0.553794	-0.182515	-1.0333	-1.22826	-0.3695	-1.20542	-1.48669	0.305689	0.616114	1.17762	1.55706	0.587453	0.851172	0.964368	708.366	20.005	C34H50N4O9S	True	2.00542	8.54973e-06	0.00602003	2.00542	Dalfopristin|C08033	13.8022	14.2322	13.2467	13.0209	14.0156	13.0473	12.7215	14.7977	15.1573	15.8077	16.2473	15.1241	15.4296	15.5607
X56373	-1.13212	-0.19718	0.146464	-1.40141	-0.695936	-1.32942	-1.33125	0.544886	0.68755	0.407717	1.28923	0.965622	0.869625	1.17621	541.345	20.268	C32H48N2O3S	False	6.19145	8.64539e-06	0.00602003	6.19145	N~1~-{4-[(4-Hydroxyphenyl)sulfanyl]phenyl}-N~2~-octadecylethanediamide	7.31866	10.729	11.9825	6.33639	8.90969	6.59898	6.59228	13.4358	13.9562	12.9354	16.1509	14.9705	14.6203	15.7386
X38402	-0.851264	-0.10551	-1.25517	-1.33373	0.0122426	-1.4471	-1.02273	1.07411	0.865648	1.23024	1.12116	0.384256	0.846773	0.481079	402.21	20.147	C23H31NO3S	False	2.53229	8.99093e-06	0.00616432	2.53229	ADP-916	16.5713	17.6723	15.975	15.859	17.8461	15.6916	16.3181	19.4138	19.1061	19.6443	19.4833	18.3954	19.0782	18.5383
X70323	-0.472243	-0.823321	-0.809263	-1.01735	-1.09168	-0.721797	-1.07425	-0.368225	0.623279	1.27536	1.33798	1.26144	1.28866	0.591406	666.338	21.308	C34H49N3O9	False	2.40673	9.14265e-06	0.00617337	2.40673	NSC210753	15.8029	15.3108	15.3305	15.0389	14.9347	15.4531	14.9591	15.9487	17.3384	18.2524	18.3401	18.2329	18.271	17.2937
X43657	-0.743117	-0.126297	-0.0764901	-1.67802	-0.966314	-0.607223	-1.72591	0.583618	0.864684	0.771257	1.16824	0.941312	0.547944	1.04631	441.693	20.087	C30H48O2	False	6.64437	9.79094e-06	0.00643064	6.64437	w/o MS2:Betulinaldehyde	11.217	13.6386	13.8342	7.54655	10.3407	11.7505	7.35852	16.4258	17.5293	17.1625	18.721	17.8301	16.2857	18.2424
X65540	-0.228127	-1.07709	-1.29638	-1.01418	-0.785112	-1.23302	-0.315592	-0.0119079	1.01759	1.40575	1.2413	0.984479	1.13547	0.176819	619.273	21.225	C30H44O12	False	3.66544	9.81226e-06	0.00643064	3.66544	Sarmentosid-A-saeure-methylester	13.5533	11.7227	11.2498	11.8583	12.3523	11.3864	13.3647	14.0196	16.2395	17.0765	16.7219	16.1681	16.4937	14.4265
X66852	-0.598133	-0.986592	-0.509817	-1.46056	-0.756077	-0.828192	-0.958926	0.400415	1.45208	1.27656	1.40502	0.897774	0.0185873	0.647869	631.31	19.996	C34H46O11	False	1.64324	1.04762e-05	0.00665889	1.64324	ekebergin	16.687	16.3207	16.7703	15.8737	16.5381	16.4701	16.3468	17.6288	18.6206	18.4551	18.5762	18.0978	17.2687	17.8621
X63920	-0.182639	-0.488157	-0.510923	-1.41602	-0.926611	-1.16794	-1.27675	-0.0819788	1.17468	1.09532	1.47154	0.997473	0.624063	0.687932	604.286	20.452	C33H43NO8	False	2.78164	1.04895e-05	0.00665889	2.78164	Succinic acid, compound with 2-(4-(3-(dibutylamino)propoxy)-3,5-dimethylbenzoyl)-4H-1-benzopyran-4-one (1:1)	14.7507	14.2524	14.2152	12.739	13.5372	13.1436	12.9662	14.9149	16.9645	16.8351	17.4487	16.6755	16.0665	16.1706
X15480	1.43566	0.965916	0.0616376	0.837602	1.58088	0.635914	0.390921	-0.869397	-1.52603	-0.271472	-1.09243	-1.12951	-0.729752	-0.289935	231.087	26.879	C6H11ClN8	True	7.01541	1.08875e-05	0.00665889	-7.01541	NSC607794	17.362	15.4099	11.652	14.8767	17.9655	14.0385	13.0204	7.78292	5.05416	10.2677	6.85606	6.70196	8.36324	10.191
X66688	-0.535876	-0.593519	-1.01158	-1.35115	-0.491567	-0.365202	-1.58521	0.263309	0.742967	1.12693	1.36502	1.14184	0.0436596	1.25038	629.396	20.704	C42H54O3	False	3.75641	1.0888e-05	0.00665889	3.75641	alloxanthin 3-acetate	10.1445	10.0168	9.09053	8.33819	10.2427	10.5226	7.81962	11.9151	12.9779	13.8286	14.3561	13.8616	11.4285	14.1021
X61756	-0.871636	-0.487489	-0.213352	-0.449827	-1.20422	-0.710412	-2	0.187669	0.775847	1.12365	0.709521	1.15693	1.16059	0.828812	586.26	18.923	C25H37N7O8	False	3.35624	1.09076e-05	0.00665889	3.35624	N-Acetyl-L-alanyl-L-seryl-L-prolyl-N-(4-nitrophenyl)-L-lysinamide	14.5139	15.2731	15.815	15.3476	13.8565	14.8325	12.2715	16.6076	17.7702	18.4577	17.6391	18.5235	18.5307	17.8749
X24683	-1.2435	-1.49708	-1.19511	-0.146637	-0.658912	-0.641625	-0.69615	1.40176	1.03137	1.45719	0.764038	0.370731	0.484688	0.569226	299.161	48.998	C14H19NO5	True	1.66461	1.15665e-05	0.00696571	1.66461	Harzianopyridone|C10150	17.2229	16.9799	17.2693	18.2742	17.7832	17.7998	17.7475	19.7582	19.4032	19.8113	19.147	18.77	18.8792	18.9603
X3042	1.34226	1.51965	1.05747	0.416423	0.515155	0.729192	0.752006	-0.754978	-1.21801	-1.23638	-0.73011	-0.478049	-1.12767	-0.786957	105.033	44.583	C7H6O2	True	1.11665	1.1845e-05	0.00703827	-1.11665	Benzoate|C00180	19.237	19.3465	19.0612	18.6656	18.7265	18.8586	18.8727	17.9425	17.6568	17.6454	17.9579	18.1135	17.7125	17.9228
X56622	-1.62217	-0.547538	-0.15799	-0.476298	-0.96347	-1.03552	-1.18984	1.01763	0.92833	1.12101	1.30583	1.14725	-0.00184167	0.474618	543.284	19.442	C33H38N2O5	False	2.17842	1.2043e-05	0.00706179	2.17842	(7Z,11E)-19-[1-(1H-indol-3-yl)ethyl]-7,9,16,17-tetramethyl-15-oxa-20-azatetracyclo[11.8.0.0??,???.0???,???]henicosa-7,11-diene-2,5,6,21-tetrone	12.829	14.1962	14.6918	14.2869	13.667	13.5754	13.379	16.1875	16.0739	16.3191	16.5542	16.3524	14.8905	15.4967
X53223	-0.881597	-0.524074	-0.44546	-0.351683	-1.06641	-1.30447	-1.43729	0.36765	0.997837	1.25159	1.42399	1.28196	0.102916	0.585041	516.768	19.348	C10H16Br3Cl3O	False	2.00347	1.22247e-05	0.00707522	2.00347	1,4,7-Tribromo-3,6,8-trichloro-3,7-dimethyl-2-octanol	14.4215	14.8386	14.9303	15.0397	14.2059	13.9282	13.7733	15.8788	16.614	16.91	17.1111	16.9454	15.57	16.1324
X63288	-0.50813	-1.31868	-0.418201	-0.913948	-0.480801	-1.19914	-1.06784	-0.185465	0.784653	0.396105	1.62647	1.24984	0.796311	1.23883	598.366	20.537	C40H49NO2	False	3.95614	1.30216e-05	0.00727676	3.95614	15-[4-(Dimethylamino)phenyl]pentadecyl pyrene-1-carboxylate	9.83644	7.93635	10.0473	8.88513	9.9005	8.21658	8.52438	10.5928	12.867	11.9561	14.8403	13.9574	12.8943	13.9316
X36795	-1.15264	-0.83134	-0.638496	-0.898901	-0.951738	-0.544881	-0.956492	0.409614	1.01428	1.56836	1.60867	1.11958	-0.115081	0.369063	389.227	19.352	C18H32N2O7	False	2.25202	1.3058e-05	0.00727676	2.25202	(2S,3R,4S,5R,6E)-N-((3S,6S)-2,3,4,5,6,7-hexahydro-6-hydroxy-1-methyl-2-oxoazepin-3-yl)-3,4,5-trihydroxy-2-methoxy-8-methylnon-6-enamide	13.2873	13.7112	13.9656	13.622	13.5523	14.0891	13.5461	15.3484	16.1461	16.8771	16.9303	16.285	14.6561	15.2949
X37479	-0.763671	-0.943841	-0.163267	-1.42213	-1.19544	-1.13055	-0.318871	0.336638	1.10397	0.979607	1.66878	1.09271	0.614235	0.141834	394.189	21.035	C24H25N3O	False	2.77357	1.32571e-05	0.00727676	2.77357	Swr 00151	14.7976	14.503	15.7792	13.7211	14.0917	14.1978	15.5248	16.5964	17.8509	17.6476	18.7743	17.8325	17.0503	16.278
X57542	-0.459813	-0.889963	-0.592282	-1.07892	-1.17613	-1.03004	-0.72988	-0.282745	0.895962	1.49862	1.3887	1.2336	0.909882	0.31302	550.805	20.493	C53H77N15O11	False	2.42085	1.34096e-05	0.00727676	2.42085	w/o MS2:[Val9]-moroidin-[QLLVWRAH]	15.852	15.2402	15.6636	14.9714	14.8332	15.041	15.4679	16.1039	17.7804	18.6376	18.4812	18.2606	17.8002	16.9512
X71802	1.40763	1.00542	0.59082	0.609303	0.430593	0.934949	0.904132	-1.63788	-0.772089	-1.20671	-0.53337	0.381096	-1.1327	-0.981194	682.427	44.682	C38H61NO8	True	6.19209	1.35153e-05	0.00727676	-6.19209	3-{2-[2-(6-{[3-acetamido-4,5-dihydroxy-6-(hydroxymethyl)oxan-2-yl]oxy}-5,5,8a-trimethyl-2-methylidene-decahydronaphthalen-1-yl)ethyl]-1,3-dimethyl-6-(prop-1-en-2-yl)cyclohex-3-en-1-yl}propanoic acid	18.9668	17.485	15.9577	16.0257	15.3674	17.2254	17.1119	7.74714	10.9367	9.3356	11.8162	15.185	9.60823	10.1664
X68959	-0.0946403	-1.1937	-0.560103	-1.29098	-0.564585	-1.04862	-1.21249	-0.231986	0.949375	0.900252	1.40829	0.930458	0.823834	1.18489	651.348	20.235	C29H57O12P	False	2.29216	1.36116e-05	0.00727676	2.29216	LysoPI(20:0/0:0)	13.8897	12.4116	13.2637	12.2808	13.2577	12.6067	12.3863	13.705	15.2938	15.2278	15.911	15.2684	15.125	15.6106
X8155	1.08807	1.10414	-0.0166991	0.9384	1.56225	0.486146	0.713151	-0.635043	-1.46662	-0.0707918	-1.33948	-0.830049	-1.16192	-0.371539	165.054	47.198	C4H9ClN4O	True	8.06591	1.37269e-05	0.00727676	-8.06591	4-Amino-6-methyl-4,5-dihydro-1,2,4-triazin-3(2H)-one--hydrogen chloride (1/1)	15.9662	16.0434	10.658	15.2471	18.2446	13.0741	14.1648	7.68692	3.6913	10.3981	4.30218	6.74995	5.15535	8.95302
X79976	-0.0589915	-0.435464	-0.198588	-1.12689	-1.33658	-1.51457	-1.24644	0.274287	0.822793	1.25183	1.07048	1.28446	0.52923	0.684432	827.46	19.838	C44H68O13	True	3.12294	1.38791e-05	0.00727676	3.12294	Okadaic acid|C01945	15.3257	14.6303	15.0679	13.3532	12.9659	12.6371	13.1324	15.9413	16.9545	17.747	17.412	17.8072	16.4122	16.6989
X43659	-0.897507	-0.356251	-0.897892	-0.605659	-1.08968	-0.118383	-1.94179	0.217073	0.946649	1.46182	0.877039	1.02697	0.502254	0.875361	441.693	20.147	C30H48O2	False	3.3894	1.41384e-05	0.00732651	3.3894	w/o MS2:Betulinaldehyde	13.699	14.7859	13.6982	14.2851	13.313	15.2636	11.6018	15.9373	17.4024	18.437	17.2626	17.5637	16.51	17.2593
X64553	-0.939642	-0.0745206	-1.44967	-0.608843	-0.626096	-0.801267	-1.39274	0.27585	-0.0584188	1.3463	1.0882	0.970336	1.32259	0.947916	609.991	21.603	C19H19N3O12S4	False	3.88575	1.4552e-05	0.00745414	3.88575	2-Naphthalenesulfonic acid, 6-(methylamino)-5-[[2-sulfo-4-[[2-(sulfooxy)ethyl]sulfonyl]phenyl]azo]-	12.0934	14.09	10.9163	12.8568	12.817	12.4127	11.0477	14.8986	14.1272	17.3692	16.7735	16.5015	17.3144	16.4497
X70036	-0.152605	-0.916973	-1.199	-0.82256	-0.572452	-1.49866	-0.890792	0.404962	0.934681	1.56429	0.765465	1.16712	0.11748	1.09906	663.668	24.67	C44H86O3	False	1.6175	1.49454e-05	0.00756867	1.6175	pentacosyl (7Z,9R)-9-hydroxynonadec-7-enoate	12.6538	11.9389	11.6751	12.0272	12.2611	11.3948	11.9634	13.1752	13.6707	14.2595	13.5124	13.8881	12.9064	13.8244
X14355	0.168066	1.35365	1.08343	0.81145	1.09963	0.820516	0.602015	0.289218	-0.97297	-1.43283	-1.42579	-0.703393	-0.941851	-0.75115	222.182	48.382	C12H25NO	True	2.40188	1.54159e-05	0.0077192	-2.40188	(2R,3S)-clavaminol B	15.3393	17.0175	16.635	16.25	16.658	16.2629	15.9536	15.5108	13.7241	13.0732	13.0831	14.1057	13.7682	14.0381
X68166	-0.765724	-0.618332	-1.29125	-0.668591	-0.605637	-0.542599	-1.56728	0.08401	0.935578	1.51349	1.38993	0.89472	0.372793	0.86889	643.805	20.486	C22H19Br4NO3	False	1.54294	1.64022e-05	0.00805675	1.54294	Tralomethrin|C18413	14.3738	14.5051	13.9054	14.4603	14.5164	14.5726	13.6594	15.1311	15.89	16.4051	16.2949	15.8536	15.3884	15.8306
X61750	-1.09838	-0.151769	-0.621776	-0.367498	-1.17049	-0.527256	-1.95171	0.345473	0.480015	1.38706	0.692662	1.15066	1.04731	0.785702	586.26	18.984	C25H37N7O8	False	3.27884	1.64695e-05	0.00805675	3.27884	N-Acetyl-L-alanyl-L-seryl-L-prolyl-N-(4-nitrophenyl)-L-lysinamide	13.9714	15.8161	14.9002	15.3957	13.8309	15.0844	12.3085	16.7851	17.0473	18.8149	17.4617	18.3542	18.1528	17.643
X55351	-0.656584	-0.722765	0.221981	-1.48146	-1.04851	-1.10439	-1.13514	0.259447	1.46765	0.804025	1.37726	0.859658	0.479872	0.678967	533.256	21.026	C20H34N10O6	False	2.40234	1.67418e-05	0.00805675	2.40234	1,4,7,10-Tetraazacyclododecane-1,4,7,10-tetrapropanenitrile, dinitrate	14.2833	14.1894	15.5296	13.113	13.7273	13.648	13.6044	15.5828	17.2968	16.3554	17.1686	16.4343	15.8955	16.178
X37045	0.303141	-0.363832	-1.17807	-1.38569	-1.18612	-0.958542	-1.07975	0.218857	0.792869	0.977955	1.29354	0.587561	0.559843	1.41823	391.181	19.065	C14H24N8O4	False	6.88826	1.70135e-05	0.00805675	6.88826	Glycyl-histidyl-arginine	11.4455	8.69623	5.33995	4.48414	5.30679	6.24485	5.74524	11.0981	13.4641	14.2271	15.5279	12.6179	12.5036	16.0419
X72764	-1.78927	0.292737	-0.67987	-0.621087	-0.677572	-1.01953	-1.37575	0.79799	0.222849	0.833679	0.798562	1.10435	1.02023	1.09269	694.332	20.704	C36H45N7O6	False	3.86398	1.71383e-05	0.00805675	3.86398	tryptophyllin L 1.3	9.38298	14.1795	11.9388	12.0742	11.9441	11.1563	10.3356	15.3434	14.0185	15.4257	15.3448	16.0492	15.8554	16.0224
X64957	0.357744	0.853927	1.67197	1.53052	0.371925	0.908575	0.201559	-1.30728	-0.199337	-0.830217	-1.05357	-0.368839	-0.93992	-1.19705	613.308	37.334	C24H60O6Si6	False	2.89056	1.71747e-05	0.00805675	-2.89056	Trimethylsilyl-scyllo-inositol	11.6683	12.5197	13.9233	13.6806	11.6926	12.6134	11.4003	8.81139	10.7124	9.62995	9.24671	10.4216	9.44172	9.00051
X8138	1.25696	0.680797	0.254426	0.240458	1.29956	1.27384	0.840901	-0.961156	-1.03724	-0.681823	-1.25085	-0.159801	-1.65865	-0.0974233	165.047	45.64	C8H8N2S	False	6.14283	1.75763e-05	0.00815927	-6.14283	1-Methyl-1,3-dihydro-2H-benzimidazole-2-thione	16.0341	13.9155	12.3477	12.2963	16.1908	16.0962	14.5042	7.87785	7.59807	8.90499	6.8126	10.8245	5.3131	11.0539
X34878	-1.06576	-0.393379	-0.951896	-0.401539	-1.59244	-0.247158	-1.34561	0.51792	0.987206	1.39012	0.914916	1.26986	0.151933	0.765826	374.224	20.138	C24H27N3O	False	1.7256	1.82833e-05	0.00839997	1.7256	Phenol, 2-(2H-naphtho[1,2-d]triazol-2-yl)-4-(1,1,3,3-tetramethylbutyl)-	15.6684	16.3455	15.783	16.3372	15.138	16.4927	15.3866	17.2631	17.7357	18.1414	17.6629	18.0203	16.8946	17.5127
X14786	1.16094	1.72142	-0.0576346	1.01686	0.469033	0.982378	0.67156	-0.660374	-1.17808	-0.391329	-1.22882	-0.35547	-1.28711	-0.863379	226.122	42.089	C10H18ClN5	True	1.87522	1.9065e-05	0.00861681	-1.87522	Ipazine|C19103	17.0426	17.6593	15.7017	16.8841	16.2812	16.8461	16.5041	15.0385	14.4688	15.3345	14.413	15.374	14.3488	14.8151
X36535	-0.934014	-1.31328	-0.645688	-0.758916	-0.685252	-1.04795	-0.768101	0.0820069	0.383195	1.30295	1.2602	0.659223	0.821275	1.64436	387.228	21.8	C22H27NO4	False	1.25631	1.9142e-05	0.00861681	1.25631	Thalicsessine|C08714	16.745	16.474	16.951	16.8701	16.9228	16.6636	16.8636	17.471	17.6863	18.3435	18.313	17.8835	17.9993	18.5875
X21177	-1.65018	-0.632155	-0.725789	-0.866491	-0.827436	-0.634395	-1.0248	1.00993	0.791982	1.32318	0.73277	0.449883	1.35587	0.697632	274.2	28.384	C13H25N5	False	1.00736	1.93625e-05	0.00862888	1.00736	1,3,5-Triazine-2,4-diamine, 6-decyl-	16.3528	16.9171	16.8652	16.7872	16.8088	16.9158	16.6994	17.8272	17.7064	18.0008	17.6736	17.5168	18.0189	17.6541
X71587	-1.317	-0.674473	-0.588176	0.00851525	-1.34953	-1.28723	-0.768536	1.13421	0.414807	1.3702	0.990029	0.791018	1.2036	0.0725793	680.346	22.683	C32H55O13S	False	1.78231	1.95593e-05	0.0086303	1.78231	pycnopodioside C	16.982	17.6526	17.7427	18.3655	16.948	17.013	17.5544	19.5405	18.7896	19.7868	19.39	19.1823	19.6129	18.4324
X22857	1.58537	1.29858	0.763343	0.287758	0.925186	0.817585	0.149941	-1.1703	-1.33054	-1.2782	-0.500211	-0.641038	-1.06253	0.155051	286.143	49.326	C12H20ClN5O	False	6.27722	2.00444e-05	0.00863856	-6.27722	1,3,5-Triazin-2-amine, N-cyclopropyl-4-ethyl-6-(4-morpholinyl)-, monohydrochloride	18.1736	17.0925	15.0746	13.2817	15.6848	15.2791	12.7622	7.78494	7.18087	7.37817	10.3111	9.78023	8.19124	12.7814
X77558	-0.782364	-0.474533	0.125388	-0.575429	-1.18617	-0.98428	-1.96793	0.247193	1.06758	0.712982	1.09051	1.15065	0.561888	1.01451	767.367	19.995	C35H58O18	False	3.98082	2.01476e-05	0.00863856	3.98082	Periplocae oligosaccharide D2	13.9556	14.6894	16.1193	14.4489	12.9931	13.4744	11.1297	16.4097	18.3652	17.5199	18.4198	18.5632	17.1598	18.2387
X52868	-1.09567	-0.843022	-0.643753	-1.34838	-0.323079	-1.5419	-0.225747	0.505911	1.25328	1.299	1.20476	0.923999	0.138093	0.696506	513.289	20.805	C22H42N4O8	False	1.56275	2.01595e-05	0.00863856	1.56275	6,9,17,20,25,28-Hexaoxa-1,3,12,14-tetraazabicyclo[12.8.8]triacontane-2,13-dione, 3,12-dimethyl-	15.821	16.0505	16.2315	15.5915	16.5228	15.4157	16.6112	17.2758	17.9546	17.9962	17.9106	17.6555	16.9417	17.4489
X48352	-0.644766	-0.907826	0.0388171	-0.693683	-1.37854	-0.843829	-1.52547	0.424217	1.51425	0.943771	0.939392	1.30047	0.25301	0.580186	477.26	20.893	C25H33NO7	False	1.86979	2.03706e-05	0.00864585	1.86979	Lankacidin C|C15758	15.0229	14.7338	15.7741	14.9692	14.2166	14.8042	14.0551	16.1976	17.3954	16.7685	16.7637	17.1605	16.0095	16.369
X64467	-1.20345	-0.0153848	-0.407811	-1.63753	-0.517555	-0.364895	-1.69336	0.869215	1.06514	0.629157	0.886846	0.747119	0.343935	1.29858	609.275	21.259	C40H36N2O4	False	4.04058	2.07715e-05	0.00873287	4.04058	N~4~,N~4~,N~4'~,N~4'~-Tetrakis(4-methoxyphenyl)[1,1'-biphenyl]-4,4'-diamine	7.53358	10.4106	9.46029	6.48241	9.19453	9.56421	6.34722	12.5527	13.0272	11.9714	12.5954	12.2571	11.2807	13.5925
X47190	0.0943889	-1.42205	-0.879567	-0.70515	-0.735126	-1.3735	-0.842136	-0.043855	0.949784	1.09548	1.26779	0.489948	1.49755	0.606439	468.308	43.338	C24H41N3O6	True	2.92085	2.13717e-05	0.00890123	2.92085	Trimethylolpropane tris(2-methyl-1-aziridinepropionate)	18.3091	15.6651	16.611	16.9151	16.8628	15.7497	16.6762	18.0681	19.8006	20.0546	20.3551	18.9988	20.7557	19.202
X42682	-0.859987	0.155294	-1.62099	-1.40669	-1.10534	-0.0379826	-0.936988	1.06098	0.371413	1.05979	0.984231	0.728303	0.385609	1.22236	434.271	20.817	C23H41NO3S	False	7.31189	2.17657e-05	0.00898139	7.31189	N-(2-Hydroxyphenyl)-N-methylhexadecane-1-sulfonamide	7.4892	11.9592	4.13872	5.08222	6.40899	11.1083	7.15018	15.9467	12.9107	15.9414	15.6088	14.482	12.9732	16.6572
X67235	-1.21866	-0.152794	-0.53139	-1.84106	-0.494144	-1.27914	-0.34273	0.925074	0.898418	1.13442	1.2891	0.601639	0.916065	0.0951951	635.305	21.517	C32H44N4O8	False	2.85215	2.22567e-05	0.00909973	2.85215	spumigin J	11.9977	13.8134	13.1685	10.9374	13.2319	11.8946	13.4898	15.6496	15.6042	16.0062	16.2697	15.0986	15.6342	14.2359
X18211	1.2574	1.21044	0.570357	1.32854	0.921138	0.488116	0.439705	-1.40054	-1.14169	-0.793491	-1.04401	-1.16431	-0.24186	-0.429782	252.086	30.342	C11H11N5O	False	1.12288	2.27046e-05	0.00919845	-1.12288	N-Hydroxy-MeIQx|C20291	14.4604	14.4307	14.026	14.5053	14.2478	13.974	13.9434	12.7798	12.9435	13.1636	13.0052	12.9292	13.5124	13.3936
X30972	-0.975824	-0.628493	-0.583675	-1.57292	-1.34388	-0.334436	-0.427857	1.13675	0.993473	1.17948	1.31653	1.14244	-0.0590792	0.157487	343.202	19.989	C20H23NO3	False	2.57604	2.32355e-05	0.00932305	2.57604	Benalaxyl|C10929	18.24	18.7738	18.8426	17.3224	17.6744	19.2256	19.0821	21.4865	21.2663	21.5521	21.7627	21.4952	19.6488	19.9816
X303	1.41525	1.21654	-0.0514698	-0.0451474	1.21404	0.87212	1.17927	-1.12418	-1.00286	-0.864644	-0.0573855	-0.461001	-1.26986	-1.02067	70.0609	44.161	C4H9NO	False	7.86181	2.34504e-05	0.00932305	-7.86181	4-Aminobutyraldehyde|C00555	16.9473	16.0046	9.98958	10.0196	15.9928	14.3708	15.8278	4.90097	5.47647	6.13213	9.96152	8.04689	4.20989	5.39199
X7564	1.51686	1.25668	0.188994	0.321265	1.52035	0.086487	0.936223	-1.14872	-0.916848	-1.29257	-1.05162	-0.559533	-0.139038	-0.71852	158.963	10.433	C4H2N2OS2	False	3.68942	2.36397e-05	0.00932305	-3.68942	[1,4]Dithiino[2,3-c][1,2,5]oxadiazole	18.0584	17.4818	15.1157	15.4088	18.0662	14.8885	16.7717	12.1512	12.665	11.8324	12.3664	13.4569	14.3888	13.1046
X34887	-0.981126	-1.13774	-1.42284	-1.32239	0.153153	-1.06647	-0.0699782	0.839152	0.86458	1.162	1.36055	0.415066	0.957595	0.248451	374.233	21.305	C22H28O4	False	2.79343	2.45972e-05	0.00961557	2.79343	(17Z)-3,11-Dioxopregna-4,17(20)-dien-21-oic acid methyl ester|C15267	14.3437	14.0818	13.6051	13.7731	16.2402	14.201	15.8672	17.3872	17.4298	17.9271	18.259	16.6782	17.5853	16.3996
X57281	-1.40031	0.138852	-0.251708	-1.60507	-0.610666	-1.60807	-0.462826	1.08651	0.611403	0.620441	1.20181	0.547608	0.975175	0.756845	548.804	21.168	C17H9Br3N2O3	False	5.3119	2.5087e-05	0.00972174	5.3119	5,7,6'-Tribrom-6-methoxyindigotin	6.72279	11.6567	10.4047	6.06641	9.25403	6.05679	9.72795	14.6945	13.1715	13.2004	15.064	12.967	14.3376	13.6377
X24017	-1.54923	-0.85044	-0.909657	-0.594858	-1.46914	-0.50538	-0.296387	1.27439	0.991919	1.08913	1.21555	0.715574	0.531288	0.357249	294.263	47.532	C14H33N5	True	1.14695	2.55849e-05	0.00982924	1.14695	1-(3-Aminopropyl)-4-methyl-1,4,8,11-tetraazacyclotetradecane	18.1315	18.5858	18.5473	18.752	18.1836	18.8101	18.946	19.9671	19.7835	19.8467	19.9289	19.6038	19.484	19.3709
X62160	-1.4208	-0.0173727	-1.09389	-0.108308	-0.658159	-0.92506	-1.5994	0.374267	0.208972	1.48856	0.875474	0.998802	0.956975	0.919939	589.294	21.15	C33H45ClO7	False	3.23379	2.60371e-05	0.00989544	3.23379	4'-chlorostypotriol triacetate	11.6308	14.3587	12.2663	14.182	13.1132	12.5944	11.2837	15.1199	14.7987	17.2858	16.0942	16.3339	16.2526	16.1806
X34676	1.61137	1.26994	0.17475	0.196705	0.960237	0.423334	1.14685	-1.58324	-0.820689	-0.62252	0.0908523	-0.904416	-1.0789	-0.864278	372.272	31.418	C21H32F2O2	False	8.42312	2.62013e-05	0.00989544	-8.42312	3,3-Difluoro-5alpha-androstan-17beta-yl acetate|C14477	17.6066	15.8661	10.2831	10.395	14.2873	11.5503	15.2386	1.32141	5.20867	6.21887	9.85542	4.78185	3.89237	4.98647
X74979	1.05263	0.624105	0.662828	-0.273977	1.17943	1.19447	1.34022	-1.41782	-0.214885	-1.16598	-0.106464	-0.603132	-1.17702	-1.0944	724.346	23.697	C39H45N7O7	False	6.3303	2.77483e-05	0.0103743	-6.3303	L-Alanyl-L-phenylalanyl-L-phenylalanyl-L-prolyl-L-tryptophylglycine	14.3182	12.6755	12.8239	9.23274	14.8043	14.8619	15.4206	4.8479	9.45926	5.81332	9.87488	7.97094	5.771	6.08769
X44130	-0.844506	0.337742	-0.558575	-1.66243	-0.530619	-0.79743	-1.73138	0.689507	0.462285	1.05776	1.03478	0.842237	0.57854	1.12209	445.211	20.488	C18H38O8P2	False	4.54484	2.84063e-05	0.0103743	4.54484	Hexadecanoic acid, 1,1-diphosphonoethyl ester	8.65766	11.9072	9.44358	6.40947	9.52042	8.78706	6.21996	12.8741	12.2496	13.8863	13.8232	13.2939	12.5691	14.0631
X44764	-1.2275	-0.946744	-0.731592	-1.07938	-1.35355	0.111546	-0.587464	1.03964	1.07822	1.24096	1.34687	0.972196	-0.209987	0.346773	450.268	20.346	C20H37N5O5	False	3.04401	2.85624e-05	0.0103743	3.04401	L-Prolyl-L-valyl-L-leucyl-L-threoninamide	17.7415	18.2559	18.6501	18.0129	17.5105	20.1949	18.9142	21.8955	21.9662	22.2643	22.4584	21.7719	19.6058	20.6259
X28895	-0.36801	-0.789195	-0.740509	-0.794382	-0.53239	-1.39064	-1.23637	0.688149	1.25503	1.18837	1.37404	-0.411421	1.23519	0.522141	328.247	34.511	C17H31N5	True	2.32286	2.8681e-05	0.0103743	2.32286	N~2~,N~2~,N~5~,N~5~-Tetraethyl-6-(piperazin-1-yl)pyridine-2,5-diamine	17.6461	17.0609	17.1286	17.0537	17.4177	16.2253	16.4396	19.1135	19.9011	19.8085	20.0665	17.5858	19.8736	18.8829
X23669	-1.67732	-0.531156	-0.428719	-0.85431	-1.17299	-0.54358	-0.5858	0.538684	1.22039	1.31347	1.3455	1.26946	0.201482	-0.0951158	292.198	21.095	C12H21N9	False	3.89045	2.87213e-05	0.0103743	3.89045	N~2~,N~4~-Bis(azetidin-3-yl)-N~6~-(azetidin-3-yl)-1,3,5-triazine-2,4,6-triamine	9.31035	12.004	12.2448	11.2446	10.4956	11.9748	11.8756	14.5183	16.1205	16.3392	16.4145	16.2358	13.7259	13.0288
X45155	-1.35839	-0.892003	-0.156402	-0.138163	-1.74537	-1.0246	-0.637616	0.821545	0.702704	0.629803	0.98386	1.07742	1.42075	0.316454	453.234	28.806	C21H32N4O7	True	1.59521	2.92179e-05	0.0103743	1.59521	HC Toxin III	17.2669	17.7044	18.3944	18.4115	16.904	17.58	17.943	19.3116	19.2002	19.1318	19.4639	19.5516	19.8737	18.8379
X51234	-0.0319843	-0.473189	-0.861139	-1.87275	-0.65283	-0.560815	-1.33812	0.456597	1.28192	1.13432	1.215	0.592011	0.101211	1.00977	500.334	40.424	C28H47NO5	False	3.9109	2.92341e-05	0.0103743	3.9109	N-Demethylholacurtine	10.5961	9.55324	8.63622	6.245	9.12861	9.34611	7.50876	11.751	13.7019	13.353	13.5437	12.0711	10.911	13.0586
X29566	0.330491	1.42736	0.468491	0.519156	1.31791	0.702341	1.08721	0.335335	-0.866315	-0.809074	-1.35888	-0.890566	-0.79013	-1.47333	333.166	42.885	C14H24N2O7	False	2.25712	2.93921e-05	0.0103743	-2.25712	Spectinomycin|C02078	14.9879	16.4684	15.1742	15.2426	16.3207	15.4898	16.0093	14.9944	13.3725	13.4498	12.7077	13.3398	13.4754	12.5532
X46216	-0.67553	-1.10726	-0.445611	-0.333486	-1.64728	-0.519156	-1.12754	-0.0348364	1.36865	1.33562	1.04373	1.21356	0.68972	0.239422	461.242	21.128	C27H30N6	False	2.21073	2.96074e-05	0.0103743	2.21073	1,3-Propanediamine, N,N,N',N'-tetrakis(2-pyridinylmethyl)-	16.2971	15.7266	16.6009	16.7491	15.0131	16.5037	15.6998	17.1437	18.9982	18.9545	18.5688	18.7932	18.1011	17.5061
X68102	-1.2988	-0.0778191	-0.498144	-1.57105	-0.893568	-1.46048	0.0305864	0.935023	0.709841	0.835467	1.36243	0.845901	1.00212	0.0784756	643.28	20.041	C38H40N2O6	False	6.22525	2.9797e-05	0.0103743	6.22525	6,7,6'-trimethoxy-2,2'-dimethyl-insularane	7.12714	11.7383	10.1509	6.09893	8.65753	6.51653	12.1477	15.5634	14.713	15.1875	17.1776	15.2269	15.8169	12.3286
X1947	-0.612834	-0.427526	-1.57389	-1.54664	-0.415725	-0.829693	-0.803508	0.743302	0.599151	1.25522	0.507772	0.854548	1.29756	0.952266	90.0551	2.859	C3H4O2	True	1.06623	3.07771e-05	0.0106124	1.06623	Acrylic acid|C00511	17.1506	17.262	16.5731	16.5894	17.2691	17.0203	17.036	17.9656	17.879	18.2732	17.824	18.0324	18.2987	18.0912
X72097	-1.16179	-0.751987	0.451567	-1.11732	-0.920613	-0.532094	-1.75719	0.442593	1.06018	0.542683	1.18517	1.06675	0.477695	1.01436	685.397	19.933	C34H63ClN2O6S	False	3.50976	3.09573e-05	0.0106124	3.50976	Clindamycin palmitate|C21594	12.0592	12.9287	15.4825	12.1536	12.5709	13.3953	10.7959	15.4634	16.7738	15.6758	17.039	16.7878	15.5379	16.6766
X43731	-0.71094	0.0467276	-0.728212	-0.320076	-1.37301	-1.6707	-1.04394	0.567433	0.29763	1.34726	0.786838	1.00094	1.45979	0.340257	442.237	22.362	C29H31NO3	False	3.03004	3.14429e-05	0.0106966	3.03004	1H-Cyclopent(f)isoquinoline, 2,3,4,7,8,9-hexahydro-5,6-dimethoxy-3-(3,3-diphenylpropionyl)-	15.7406	17.1259	15.709	16.4552	14.53	13.9857	15.1317	18.078	17.5846	19.5038	18.4791	18.8706	19.7096	17.6626
X81985	0.117517	-0.533374	-2	-1.1595	-1.18317	-0.18471	-0.815448	0.472666	0.517828	0.965493	1.1775	0.803395	0.739719	1.09573	902.794	26.217	C57H104O6	False	4.20649	3.20635e-05	0.0108251	4.20649	w/o MS2:Glyceryl trioleate	11.2736	9.61348	5.83794	8.0165	7.95613	10.5028	8.89403	12.1794	12.2946	13.4364	13.9772	13.023	12.8606	13.7686
X160	-0.898212	0.189299	-0.656392	-1.32197	0.029535	-1.64129	-1.45356	0.889377	0.42378	0.913403	1.05043	0.442677	1.0354	0.997523	69.0382	20.824	C4H4O	False	6.65726	3.28778e-05	0.0109784	6.65726	3-Butyn-1-al|C06145	7.25386	11.6587	8.23333	5.53745	11.0116	4.24407	5.00447	14.4943	12.6085	14.5917	15.1467	12.685	15.0858	14.9324
X30829	-1.05488	-0.415619	-0.25917	-0.789585	-0.798324	-1.14157	-1.32586	0.0785343	1.36335	1.31945	1.37874	1.10322	0.747769	-0.206048	342.225	19.976	C17H29N5O	False	3.27625	3.30102e-05	0.0109784	3.27625	N-[(E)-Amino(4-methoxyanilino)methylidene]-N''-octylguanidine	13.8504	15.1175	15.4276	14.3762	14.3589	13.6785	13.3132	16.097	18.6437	18.5567	18.6742	18.1281	17.4235	15.5329
X38401	-0.823363	-0.35643	-0.822735	-1.58368	-0.00456052	-1.58876	-0.649355	1.23149	1.11034	0.99014	1.33809	0.629206	0.327293	0.202328	402.209	20.059	C23H31NO3S	False	2.27539	3.38137e-05	0.0110978	2.27539	ADP-916	16.4536	17.0916	16.4544	15.4148	17.5723	15.4078	16.6913	19.2611	19.0956	18.9313	19.4067	18.4382	18.0257	17.855
X74030	-0.156858	-0.672266	-0.180804	-1.56714	-1.00928	-1.01334	-1.23767	-0.0619002	1.16943	1.10315	1.49327	0.969963	0.477635	0.685806	710.849	20.089	C31H30N6O6S4	False	2.17602	3.38676e-05	0.0110978	2.17602	w/o MS2:(1S,11R,14R)-14-(hydroxymethyl)-3-(3-{[(1R,4R)-4-(hydroxymethyl)-5,7-dimethyl-6,8-dioxo-2,3-dithia-5,7-diazabicyclo[2.2.2]octan-1-yl]methyl}-1H-indol-1-yl)-18-methyl-15,16-dithia-10,12,18-triazapentacyclo[12.2.2.0?,??.0?,??.0?,?]octadeca-4(9),5,7-triene-13,17-dione	15.2178	14.5453	15.1866	13.3778	14.1056	14.1003	13.8077	15.3417	16.9482	16.8618	17.3707	16.688	16.0456	16.3172
X51955	-0.763642	-0.794847	-0.323608	-0.726829	-0.686419	-1.27094	-1.35028	-0.331862	0.820738	0.964906	1.38293	0.773662	1.57574	0.73046	506.269	19.07	C28H41O6S	False	1.63148	3.43157e-05	0.0111626	1.63148	sodium (16S,20S,24E)-16,20-dihydroxy-19-norstigmasta-1,3,5(10),24(28)-tetraen-3-yl sulfate	14.6648	14.6347	15.0895	14.7003	14.7393	14.1752	14.0986	15.0815	16.1939	16.3331	16.7365	16.1485	16.9226	16.1068
X80943	-0.879549	-0.422195	0.0263447	-1.70966	-1.24258	-0.535263	-0.985091	0.0879115	1.37001	0.917867	1.38382	1.13206	0.557227	0.299084	860.398	20.087	C45H55N7O9	True	5.73324	3.46631e-05	0.0111939	5.73324	szentiamide	10.6488	12.2455	13.8113	7.75091	9.3815	11.8507	10.2804	14.0263	18.5021	16.9237	18.5503	17.6714	15.6647	14.7635
X15886	1.28138	1.42425	0.0532903	0.843494	0.83297	1.05653	0.374946	-0.361698	-0.917444	-0.15793	-1.71034	-0.981239	-1.23541	-0.502781	234.169	44.365	C10H21N5	True	1.87684	3.51256e-05	0.0112617	-1.87684	(E)-1-(2-Azido-4-methylpentan-2-yl)-2-tert-butyldiazene	16.8774	17.0374	15.5023	16.3871	16.3753	16.6256	15.8625	15.0377	14.4154	15.2658	13.5276	14.344	14.0594	14.8797
X35251	-0.823465	-1.30558	0.187791	-1.03014	-1.2171	-0.37796	-1.28037	0.798355	1.04183	0.348803	1.10662	1.0545	0.0568679	1.43984	377.197	20.157	C19H31ClN2O2	False	2.00781	3.56522e-05	0.0113488	2.00781	1,1-Bis[2-(dimethylamino)ethyl]-7-methoxy-3,4-dihydronaphthalen-2(1H)-one--hydrogen chloride (1/1)	17.2489	16.6694	18.4643	17.0005	16.7758	17.7843	16.6997	19.1981	19.4908	18.6578	19.5686	19.506	18.3069	19.9691
X39998	-0.556329	-0.785165	-0.487877	-0.639393	-0.790039	-1.63304	-1.07391	-0.0772598	0.497871	1.14146	1.07468	0.989998	1.69658	0.64242	414.32	41.135	C22H41N5O	False	1.42888	3.61684e-05	0.0114315	1.42888	Phloeodictine A5	15.0154	14.8235	15.0727	14.9457	14.8194	14.1128	14.5815	15.417	15.8991	16.4386	16.3826	16.3117	16.904	16.0203
X44913	-1.15329	-0.417712	-0.467905	-0.911768	-1.01881	-0.195188	-1.65676	0.125558	0.857275	0.855749	1.69461	1.15881	0.184612	0.944802	451.257	21.457	C25H36N2O4	False	2.21405	3.6537e-05	0.0114667	2.21405	palau'imide	14.5151	15.4942	15.4274	14.8366	14.6941	15.7904	13.8449	16.2174	17.1914	17.1894	18.306	17.5928	16.296	17.3079
X40240	-0.972877	-0.275216	-0.415701	-0.986631	-0.89623	-0.553794	-1.65885	0.539033	1.1569	1.33831	1.44189	1.19892	0.164041	-0.0797999	416.249	19.993	C26H36NP	False	3.55866	3.72021e-05	0.0115938	3.55866	2-Dicyclohexylphosphino-2'-(N,N-dimethylamino)biphenyl	14.4195	15.9283	15.6245	14.3898	14.5853	15.3259	12.936	17.6893	19.0255	19.4178	19.6418	19.1164	16.8783	16.351
X56117	-0.0826209	-1.32631	-0.165045	-1.00422	-0.762253	-1.74247	-0.696516	-0.0940357	1.29928	0.792135	0.865099	0.824361	1.32386	0.768753	539.286	20.893	C29H38N4O6	False	2.83079	3.7506e-05	0.0116073	2.83079	WAY-100635 maleate salt	14.14	12.0079	13.9987	12.5601	12.9749	11.2945	13.0876	14.1204	16.509	15.6396	15.7647	15.6948	16.5511	15.5995
X33782	0.199363	-1.03938	-0.540407	-0.517017	-1.1524	-1.27038	-1.44343	-0.112189	0.585939	1.26271	1.2642	1.00273	0.57033	1.18993	365.233	21.136	C22H28N4O	False	3.09121	3.89997e-05	0.0119864	3.09121	Benzenamine, 4,4'-(1,3,4-oxadiazole-2,5-diyl)bis[N,N-diethyl-	16.6738	14.3485	15.2852	15.3291	14.1364	13.9149	13.5901	16.089	17.3995	18.6699	18.6727	18.1819	17.3702	18.5333
X45148	0.23737	-1.15352	-1.60581	-0.147267	-1.39065	-1.30896	-0.364174	0.432832	0.870791	1.39311	0.798242	0.728773	0.89464	0.614623	453.213	21.517	C24H28N4O5	False	4.72789	3.97017e-05	0.0120424	4.72789	T0509-4626	11.8106	7.79599	6.4905	10.7004	7.11155	7.34732	10.0743	12.3748	13.6389	15.1465	13.4295	13.229	13.7077	12.8995
X31839	1.23797	1.35062	0.800692	0.216322	1.21859	0.950597	-0.0544312	-0.903911	-0.910586	-1.4984	-0.727108	-0.749275	-1.22345	0.292373	350.181	24.932	C22H25N2S	False	7.61004	3.97226e-05	0.0120424	-7.61004	2-(4-(4-N,N-Dimethylanilinyl)-1,3-butadienyl)-3-propyl-benzothiazolium	17.3389	17.8634	15.3029	12.5819	17.2487	16.0009	11.3212	7.36588	7.3348	4.59783	8.18911	8.0859	5.87806	12.936
X34403	-0.197262	-1.13288	-0.593088	-0.474466	-1.73302	-1.01431	-0.658316	-0.196676	0.869534	1.44665	0.673631	1.11037	1.30792	0.591913	370.293	40.572	C19H41NO4	True	2.23679	4.02526e-05	0.0121206	2.23679	N-Decyl-2,5,8,11-tetraoxatridecan-13-amine	17.5535	16.2914	17.0195	17.1796	15.4818	16.4513	16.9316	17.5543	18.9926	19.7712	18.7284	19.3175	19.584	18.6181
X65364	-0.515537	-0.177474	-0.67105	-1.737	-0.634073	-0.217305	-1.77906	0.354723	1.04378	0.602783	1.18046	0.891539	0.33967	1.31854	617.307	27.638	C35H46O8	False	4.21844	4.13992e-05	0.0123443	4.21844	Aglycon-E	9.34106	10.2119	8.94045	6.19453	9.03571	10.1093	6.08616	11.5829	13.3579	12.2219	13.71	12.9657	11.5441	14.0657
X81987	0.111365	-0.402427	-1.9544	-1.27641	-1.20874	-0.212709	-0.786303	0.50217	0.419477	1.11765	1.15008	0.836928	0.62677	1.07654	902.796	26.267	C57H104O6	False	4.32839	4.15493e-05	0.0123443	4.32839	w/o MS2:Glyceryl trioleate	11.0444	9.68594	5.58246	7.37509	7.55401	10.1876	8.67095	12.0777	11.8591	13.7051	13.7908	12.9628	12.4072	13.5964
X62395	-1.52264	-0.114979	-0.283426	-0.460008	-1.02358	-1.48749	-0.909193	0.54429	0.367473	1.05603	1.47552	0.93032	1.29743	0.130259	591.275	22.227	C38H38O6	False	2.14161	4.28772e-05	0.0126545	2.14161	bis[2-(biphenyl-4-yl)-2-oxoethyl] decanedioate	14.0741	15.8929	15.6753	15.4471	14.7189	14.1195	14.8667	16.7447	16.5163	17.4059	17.9479	17.2435	17.7178	16.2098
X33988	-0.218993	-0.969966	-0.599447	-1.26041	-1.05462	-1.34479	-0.438934	-0.201018	1.03785	1.38084	1.29312	1.23361	0.769837	0.372915	367.202	19.983	C17H32N2O3S	False	1.56818	4.4363e-05	0.0129235	1.56818	N-(5-Oxo-2-sulfanyl-1,3-oxazolidin-2-yl)tetradecanamide	15.4076	14.7075	15.0529	14.4367	14.6285	14.358	15.2026	15.4244	16.5794	16.8991	16.8174	16.7619	16.3295	15.9594
X21851	-0.992497	-0.781724	-1.26642	-0.123409	-0.315663	-1.64544	-0.919074	0.667196	0.535482	1.39415	1.17352	0.274391	1.05459	0.944895	279.1	49.051	C10H22Cl2N2O	False	1.1862	4.4426e-05	0.0129235	1.1862	2-[1-(Cyclopropylmethyl)piperazin-2-yl]ethan-1-ol--hydrogen chloride (1/2)	14.2124	14.3572	14.0242	14.8093	14.6773	13.7639	14.2628	15.3524	15.2619	15.8517	15.7002	15.0826	15.6185	15.5431
X49678	-0.57341	-0.249818	-0.586113	-0.606473	-0.971053	-1.32479	-1.50055	-0.0137098	0.338449	1.3921	1.50299	1.28209	0.913961	0.396328	488.229	21.43	C27H29N5O4	False	1.97853	4.46589e-05	0.0129235	1.97853	Fiscalin C	14.9629	15.3485	14.9478	14.9235	14.4891	14.0677	13.8583	15.6298	16.0493	17.3047	17.4368	17.1736	16.735	16.1183
X39235	-0.914895	-0.985939	-0.608253	-0.577214	0.272129	-1.05521	-1.90959	1.01237	1.28648	0.948384	0.433778	0.246183	0.690332	1.16145	408.251	19.785	C24H35NO3	False	2.28958	4.5319e-05	0.0130299	2.28958	aspochalasin DTMC-169	14.2568	14.1583	14.682	14.725	15.9028	14.0622	12.8775	16.9293	17.3094	16.8405	16.1269	15.8668	16.4827	17.136
X66461	0.372196	-0.792232	-1.34535	-0.228975	-1.15029	-1.14701	-1.40706	-0.0404822	0.692839	1.22469	0.682491	0.929892	1.11798	1.09131	627.267	19.461	C34H40N2O8	False	6.30273	4.64065e-05	0.0131745	6.30273	Araliopdimerine B	11.9507	7.44324	5.30213	9.6236	6.05721	6.06992	5.06327	10.3532	13.1919	15.2507	13.1519	14.1095	14.8376	14.7344
X27208	0.54775	1.14529	1.47694	0.736504	1.49847	0.0892236	0.37202	-0.149379	-0.431145	-1.12069	-1.27448	-1.44019	-0.554246	-0.896081	316.283	47.442	C16H39NO3	False	1.61618	4.66908e-05	0.0131745	-1.61618	N,N-Dimethyltetradecan-1-amine N-oxide--water (1/2)	16.5918	17.168	17.4878	16.7738	17.5085	16.1496	16.4223	15.9195	15.6478	14.9829	14.8346	14.6749	15.5291	15.1995
X48725	-1.18244	-0.425571	-1.20212	-0.388395	-0.916268	-0.563778	-1.24935	0.332274	0.00931069	1.80041	0.73446	1.17939	0.746542	1.12554	480.25	21.722	C27H33N3O5	False	1.40509	4.67185e-05	0.0131745	1.40509	Fumitremorgin B|C20630	14.7977	15.4256	14.7814	15.4565	15.0185	15.311	14.7422	16.0543	15.7864	17.2723	16.388	16.7571	16.398	16.7124
X56620	-1.62522	0.164332	-0.55393	-0.56143	-0.780454	-1.22582	-1.19857	0.996295	0.336239	1.31349	1.33551	1.0384	0.0815415	0.679619	543.284	19.486	C31H40N2O5	False	2.18985	4.70044e-05	0.0131745	2.18985	N-[2-(3,4-Dimethoxyphenyl)ethyl]-N-[(5-methylfuran-2-yl)methyl]-N~2~-pentyl-N~2~-(phenylacetyl)glycinamide	12.653	15.0256	14.0733	14.0634	13.773	13.1825	13.2186	16.1286	15.2535	16.5491	16.5783	16.1844	14.9158	15.7087
X18593	1.28707	1.13948	0.284163	0.338644	0.484367	0.970128	1.18711	-1.44171	-0.936598	-1.01207	-0.142629	0.347932	-1.29449	-1.2114	255.075	29.919	C9H19ClN2S2	False	5.90637	4.90998e-05	0.0136385	-5.90637	(2S,3S)-2-Amino-3-methyl-1-(1,3-thiazolidin-3-yl)pentane-1-thione--hydrogen chloride (1/1)	18.3465	17.8104	14.7035	14.9014	15.4307	17.1952	17.9834	8.4343	10.2691	9.99496	13.1532	14.9351	8.96906	9.27088
X36232	0.530581	0.35521	0.243535	1.82956	0.164947	1.34735	1.30891	-0.547477	-0.969999	-0.373404	-1.12603	-0.402378	-1.05146	-1.30936	385.225	23.409	C24H30N2O	False	2.11405	4.92718e-05	0.0136385	-2.11405	Propionanilide, N-(1-((2-phenylcyclopropyl)methyl)-4-piperidyl)-, (E)-	15.1336	14.9091	14.7661	16.7964	14.6655	16.1791	16.1299	13.7535	13.2127	13.9764	13.0129	13.9393	13.1084	12.7782
X13916	1.35768	0.579048	1.55356	-0.0335236	0.958843	0.262588	1.22667	-0.974224	-0.911388	-1.32547	-0.603167	-0.580469	-0.237355	-1.27279	218.174	40.616	C11H23NO3	True	1.43699	4.97903e-05	0.0136969	-1.43699	Insect repellent M 3535	18.6798	18.0166	18.8466	17.4948	18.3401	17.747	18.5682	16.6936	16.7471	16.3944	17.0096	17.029	17.3212	16.4393
X30332	-1.67103	-0.640174	-1.11245	-0.52473	-1.34527	-0.768872	-0.0684552	1.15591	0.825227	1.091	1.08787	0.794613	0.875564	0.300789	338.289	47.536	C16H37N5O	True	1.04595	5.03239e-05	0.0137285	1.04595	Octanamide, N-[2-[[2-[[2-[(2-aminoethyl)amino]ethyl]amino]ethyl]amino]ethyl]-	17.162	17.7775	17.4956	17.8465	17.3565	17.7007	18.1189	18.85	18.6525	18.8112	18.8094	18.6343	18.6826	18.3394
X26999	-1.84046	-0.4718	-0.95454	-1.2647	-0.00621168	-0.0659855	-1.07522	1.33603	0.58172	0.608619	0.491978	0.263607	1.05541	1.34156	315.12	29.708	C14H18O8	True	7.83925	5.1052e-05	0.0137285	7.83925	Glucovanillin|C19808	4.02806	10.6407	8.30834	6.8098	12.8901	12.6013	7.72529	19.3751	15.7307	15.8607	15.2971	14.1937	18.0193	19.4018
X50767	0.905824	0.543403	0.543477	0.836635	1.45265	0.602913	0.798103	-0.818288	-1.70543	-0.376075	-1.91061	-0.140046	-0.611568	-0.12099	497.075	45.665	C21H20O12S	True	6.2389	5.10914e-05	0.0137285	-6.2389	{[6-(5,7-dihydroxy-4-oxo-2-phenyl-4H-chromen-6-yl)-3,4,5-trihydroxyoxan-2-yl]methoxy}sulfonic acid	16.5729	15.1803	15.1806	16.307	18.674	15.409	16.159	9.94821	6.53951	11.6474	5.75111	12.5543	10.7425	12.6275
X33903	-0.878675	-0.910506	-0.581114	0.223836	-0.506533	-1.41504	-1.70204	0.55978	1.07802	0.754342	0.567654	0.207792	1.4728	1.12969	366.262	36.632	C20H33N5	False	2.15057	5.11374e-05	0.0137285	2.15057	CHEMBL20587	13.8537	13.8122	14.2419	15.292	14.3392	13.1541	12.7797	15.7302	16.4062	15.984	15.7405	15.271	16.9212	16.4736
X68174	-0.429403	-0.291429	-1.10264	-0.677512	-0.500808	-1.24061	-1.46609	-0.0795739	-0.110111	1.30381	1.18833	0.982532	1.41659	1.00691	643.855	21.182	C20H18Br3NO7	False	3.38613	5.17705e-05	0.013789	3.38613	methyl 1-(2-(2,3-dibromo-4,5-dihydroxybenzyl)-3-bromo-4,5-dihydroxybenzyl)-5-oxopyrrolidine-2-carboxylate	12.678	12.9644	11.2802	12.1629	12.5297	10.9938	10.5257	13.4042	13.3408	16.2763	16.0365	15.6093	16.5104	15.6599
X5803	-0.665317	-1.44243	-0.281914	-0.521197	-1.11898	-1.15014	-0.820918	0.200892	0.377543	0.751929	1.09535	1.02941	1.83349	0.712275	138.127	36.955	C9H17NO	True	1.20384	5.23901e-05	0.013789	1.20384	N-Methylpelletierine|C06184	17.5199	16.9743	17.7891	17.6211	17.2014	17.1795	17.4107	18.1281	18.2521	18.515	18.7561	18.7098	19.2744	18.4872
X17137	0.204822	-0.874513	-1.54606	0.050328	-1.12795	-0.996743	-1.38879	0.00184878	0.696836	1.26182	0.791536	0.893508	0.882558	1.1508	244.128	20.897	C9H15N7	False	6.15469	5.24542e-05	0.013789	6.15469	Guanidine, ((2,6-pyridylidene)dimethylene)di-	11.9612	7.86706	5.31973	11.3752	6.90569	7.40341	5.91627	11.1913	13.8275	15.9707	14.1868	14.5736	14.532	15.5495
X55661	-1.50498	-0.998727	0.416984	-0.460651	-1.07967	-0.97879	-1.23222	0.499833	1.35282	0.898273	1.00697	1.18011	0.523796	0.376255	535.303	20.716	C31H44O6	False	1.64196	5.28121e-05	0.013789	1.64196	6,7'-bis(2-hydroxypropan-2-yl)-4,5',8a,9'a-tetramethyl-3,3'a,4',5,6,6',7,7',8,8',8a,9',9'a,9'b-tetradecahydro-1H,3'H-spiro[naphthalene-2,2'-naphtho[1,2-b]furan]-3,3',4'-trione	14.0166	14.515	15.9086	15.0447	14.4353	14.5346	14.2851	15.9901	16.8298	16.3823	16.4894	16.6598	16.0137	15.8685
X61904	-0.49435	-0.143338	-1.00713	-1.51607	-0.484121	-1.69026	-0.387041	0.557405	0.532425	1.19977	1.44705	0.752274	1.21961	0.0137858	587.276	21.149	C35H34N6O3	False	2.81993	5.29098e-05	0.013789	2.81993	(5S,6S,4R,7R)-1,3-Bis((1H-indazol-5-yl)methyl)-4,7-dibenzyl-5,6-dihydroxy-1,3-diazepin-2-one	12.8436	13.4491	11.9592	11.0814	12.8613	10.781	13.0287	14.6577	14.6146	15.7656	16.1921	14.9938	15.7999	13.7201
X11561	-0.507266	-0.195508	-1.27523	-1.46425	-1.20325	-0.803356	-0.71907	1.01217	0.180411	0.901813	0.589802	1.34816	1.1309	1.00467	198.096	2.827	C6H12O6	True	0.997661	5.38573e-05	0.0139544	0.997661	D-Glucose|C00031	18.7928	18.9693	18.3581	18.2511	18.3988	18.6252	18.6729	19.653	19.1822	19.5906	19.4139	19.8432	19.7202	19.6488
X65542	-0.206963	-0.591577	-0.567776	-1.70823	-0.948268	-1.41711	-0.23706	-0.231142	1.14902	0.976304	1.39684	1.02759	0.949959	0.408411	619.273	21.122	C30H44O12	False	5.33646	5.42968e-05	0.0139869	5.33646	Sarmentosid-A-saeure-methylester	11.4422	10.1768	10.2551	6.50295	9.00326	7.46073	11.3432	11.3626	15.9035	15.3352	16.7188	15.504	15.2485	13.4668
X32901	-0.145425	-1.94772	-0.275452	-0.275614	-1.31779	-1.02463	-0.801075	0.389428	1.01689	0.859806	1.12993	0.359692	1.33981	0.692137	358.258	33.405	C19H35NO5	True	1.87963	5.52783e-05	0.014106	1.87963	(1alpha,2beta,5alpha)-5-Methyl-2-(1-methylethyl)cyclohexyl (R)-N-(2,4-dihydroxy-3,3-dimethyl-1-oxobutyl)-beta-alaninate	19.0082	16.9595	18.8604	18.8602	17.6756	18.0088	18.2629	19.6161	20.3293	20.1508	20.4578	19.5823	20.6964	19.9602
X60128	-0.771969	-1.20876	-0.419768	-1.0635	-0.725763	-1.53952	-0.0179184	0.216596	1.22141	1.13598	1.36571	0.957141	1.04425	-0.193883	571.823	21.16	C11H12I3NO2	False	2.2516	5.5392e-05	0.014106	2.2516	w/o MS2:MLS002154127-01!Iopanoic acid96-83-3	12.1699	11.571	12.6529	11.7702	12.2333	11.1175	13.2039	13.5255	14.9033	14.7861	15.1011	14.5409	14.6603	12.9626
X47723	-0.61052	-0.811156	-0.691276	-1.56402	-1.29515	-0.716533	-0.0187609	0.384789	1.08431	1.60772	1.33771	1.02753	0.31299	-0.0476262	472.27	21.026	C27H37NO6	False	2.97388	5.57819e-05	0.0141245	2.97388	deoxyyuzurimine	15.4153	15.0494	15.268	13.6764	14.1667	15.2219	16.4945	17.2304	18.5061	19.4607	18.9682	18.4026	17.0995	16.4418
X79671	0.409968	0.163736	1.45591	0.495016	0.251313	1.44903	1.54009	-0.822181	-0.561286	-0.823103	-0.445271	-0.485749	-0.894754	-1.73273	818.365	22.641	C45H53N3O10	True	2.03534	5.62283e-05	0.0141472	-2.03534	Benzyl (2S)-4-({(2R,3R,4R,5S,6R)-3-acetamido-4,5-bis(benzyloxy)-6-[(benzyloxy)methyl]oxan-2-yl}amino)-2-[(tert-butoxycarbonyl)amino]-4-oxobutanoate (non-preferred name)	15.6711	15.3669	16.9636	15.7762	15.4751	16.9551	17.0676	14.1486	14.471	14.1475	14.6144	14.5643	14.0589	13.0235
X27218	0.497065	1.06165	1.59511	0.714381	1.51133	0.170663	0.276421	-0.142309	-0.432345	-1.16086	-1.22929	-1.45095	-0.618958	-0.791911	316.284	47.523	C18H37NO3	True	1.63453	5.67007e-05	0.0141472	-1.63453	(8E)-2-aminooctadec-8-ene-1,3,4-triol	16.5795	17.1338	17.6576	16.7928	17.5753	16.259	16.3628	15.9517	15.6669	14.9516	14.8844	14.6668	15.4837	15.3139
X51430	-0.160361	-1.33076	-0.407694	-1.28411	-1.08405	-0.749854	-0.757688	0.155907	1.35955	1.45145	1.24489	1.21791	0.123601	0.221216	502.251	20.189	C32H36ClNO2	False	1.93801	5.69174e-05	0.0141472	1.93801	4-Piperidinol, 1-(3-(10,11-dihydro-5H-dibenzo(a,d)cyclohepten-5-ylidene)propyl)-4-phenyl-, propionate, hydrochloride	14.52	13.1452	14.2294	13.2	13.435	13.8275	13.8183	14.8915	16.3053	16.4133	16.1706	16.139	14.8535	14.9682
X19473	0.571875	1.597	0.156851	0.599717	1.32329	1.21949	0.360239	-0.0466156	-1.2871	-0.637749	-1.06517	-1.29337	-1.18207	-0.316377	261.169	45.906	C12H22N4O	False	1.61821	5.7267e-05	0.0141472	-1.61821	Bis(((2-aminoethyl)amino)methyl)phenol	16.2076	17.2038	15.8043	16.2347	16.9378	16.8369	16.002	15.6066	14.4012	15.0322	14.6169	14.3951	14.5033	15.3445
X38807	-0.720976	-0.92932	-1.67415	-0.708742	-0.588404	0.190368	-1.36701	0.549786	1.01994	1.61778	1.0465	0.691366	0.16587	0.706989	405.201	20.603	C17H35O7P	False	1.75166	5.8332e-05	0.0141472	1.75166	[(2R)-2-hydroxy-3-(tetradecanoyloxy)propoxy]phosphonic acid	15.8317	15.6114	14.8238	15.8446	15.9718	16.7953	15.1486	17.1753	17.6725	18.3046	17.7005	17.325	16.7694	17.3415
X61517	0.164186	-0.991479	-1.77017	-1.33324	-1.0708	-0.048478	-0.610999	0.260626	1.04229	1.13218	1.22096	0.682074	0.280873	1.04198	584.263	20.889	C27H45O10S	False	5.61034	5.91293e-05	0.0141472	5.61034	(1R,3R,3aS,3bS,4R,5R,5aR,6R,7S,9aS,9bR,11aR)-3,3b,4,6,7-pentahydroxy-1-[(2R,3E,5R)-5-hydroxy-6-methylhept-3-en-2-yl]-9a,11a-dimethyl-hexadecahydro-1H-cyclopenta[a]phenanthren-5-yl sulfate	12.8048	8.79617	6.09511	7.61071	8.52103	12.0671	10.1159	13.1393	15.8507	16.1625	16.4704	14.6012	13.2096	15.8496
X55842	-1.05502	-0.593187	-1.43374	-1.29699	-0.109118	-0.487765	-0.707263	0.325982	1.05796	1.54193	1.52202	0.86788	0.57539	-0.20808	537.238	20.875	C33H32N2O5	False	3.47644	5.93261e-05	0.0141472	3.47644	N-[(2S)-1-{[(2S)-2-{[hydroxy(phenyl)methylidene]amino}-3-phenylpropanoyl]oxy}-3-(4-methoxyphenyl)propan-2-yl]benzenecarboximidic acid	11.1062	12.095	10.2954	10.5882	13.1314	12.3207	11.8508	14.063	15.6302	16.6663	16.6237	15.2232	14.597	12.9195
X30679	0.510451	1.71607	0.224259	0.681328	1.02456	0.992437	0.694434	0.0671741	-0.937312	-0.536268	-0.990288	-1.47392	-1.48303	-0.489897	341.184	43.672	C15H36P4	False	1.52577	5.97698e-05	0.0141472	-1.52577	[Phosphanetriyltri(propane-3,1-diyl)]tris(dimethylphosphane)	16.2563	17.3581	15.9948	16.4125	16.7261	16.6968	16.4245	15.8512	14.9333	15.2998	14.8848	14.4429	14.4345	15.3421
X68178	-0.837684	-0.259804	0.226697	-1.08419	-0.539465	-1.20815	-2	0.158896	0.901065	0.931295	0.999999	0.797297	0.769051	1.14669	643.856	20.95	C20H18Br3NO7	False	2.73322	5.99387e-05	0.0141472	2.73322	methyl 1-(2-(2,3-dibromo-4,5-dihydroxybenzyl)-3-bromo-4,5-dihydroxybenzyl)-5-oxopyrrolidine-2-carboxylate	11.7693	12.7385	13.5543	11.3559	12.2695	11.1481	9.81725	13.4406	14.6853	14.736	14.8512	14.5112	14.4639	15.0972
X78795	-0.454476	-0.892487	0.169169	-1.84577	-0.521742	-1.40644	-0.789592	0.696245	1.07839	0.36436	1.43406	1.1129	0.361463	0.693925	792.4	19.498	C37H63N5O8S2	False	2.11724	6.12039e-05	0.0141472	2.11724	eudistomide B	11.5563	10.991	12.3613	9.76059	11.4695	10.3276	11.1238	13.0416	13.5348	12.6132	13.9939	13.5793	12.6095	13.0386
X38942	-0.77644	-0.912678	-0.0880595	-0.864226	-1.56788	-0.913106	-0.630741	0.0901496	1.16292	1.30774	1.44402	1.3724	0.118512	0.257385	406.227	20.147	C28H27N3	False	2.00097	6.1392e-05	0.0141472	2.00097	4,4'-{[2-(Pyrrolidin-1-yl)ethane-1,1-diyl]di(4,1-phenylene)}dipyridine	16.0363	15.8704	16.8742	15.9294	15.0728	15.8699	16.2136	17.0912	18.3971	18.5734	18.7393	18.6521	17.1257	17.2948
X23784	0.628388	1.63658	0.88873	0.474192	1.15242	0.565628	0.303845	-0.103423	-0.973904	-0.908458	-0.864689	-0.540031	-2	-0.182077	293.114	48.325	C12H19ClN4O	False	6.88903	6.14023e-05	0.0141472	-6.88903	Urea, N-((dimethylamino)iminomethyl)-N'-(2,6-dimethylphenyl)-, monohydrochloride	11.0808	15.3835	12.1919	10.4228	13.3172	10.813	9.69577	7.95767	4.24271	4.52201	4.70881	6.09435	-0.465832	7.62199
X50505	0.4349	-0.853112	-1.89251	-0.487807	-1.18906	-0.551596	-1.12256	0.177031	0.867531	1.29962	0.686737	0.735557	0.905173	0.990097	495.24	18.793	C25H36N4O3S	False	4.5498	6.14201e-05	0.0141472	4.5498	2-({[1,2-Bis(4-methoxyphenyl)butyl]amino}acetyl)-N-butylhydrazine-1-carbothioamide (non-preferred name)	13.7681	10.1455	7.22203	11.1729	9.20058	10.9935	9.38761	13.0429	14.985	16.2003	14.4765	14.6138	15.0908	15.3297
X34882	-1.00309	-0.377044	-1.39037	-0.680326	-1.51728	-0.451949	-0.352657	0.504139	0.678652	1.59865	1.25033	1.34651	0.421193	-0.0267608	374.224	20.198	C24H27N3O	False	1.84604	6.16634e-05	0.0141472	1.84604	Phenol, 2-(2H-naphtho[1,2-d]triazol-2-yl)-4-(1,1,3,3-tetramethylbutyl)-	15.5855	16.2862	15.152	15.9468	15.01	16.2024	16.3135	17.2725	17.4678	18.4975	18.1076	18.2153	17.1796	16.6783
X46607	-0.259081	-0.259768	-0.615344	-1.83233	-0.668175	-1.53259	-0.546724	0.378117	0.357254	1.47946	1.08826	1.29365	0.34216	0.775104	464.22	19.832	C29H31NO3	False	2.45111	6.16773e-05	0.0141472	2.45111	1H-Cyclopent(f)isoquinoline, 2,3,4,7,8,9-hexahydro-5,6-dimethoxy-3-(3,3-diphenylpropionyl)-	13.7405	13.7395	13.2056	11.3784	13.1263	11.8285	13.3086	14.6972	14.6658	16.3507	15.7634	16.0717	14.6432	15.2932
X60130	-0.225806	-0.919785	-1.89758	-0.547021	-0.610403	-1.11843	-0.408283	-0.090468	0.739058	1.31216	1.31353	1.00983	1.14	0.303207	571.823	21.277	C11H12I3NO2	False	2.25856	6.17496e-05	0.0141472	2.25856	w/o MS2:MLS002154127-01!Iopanoic acid96-83-3	13.4652	12.5074	11.1578	13.0219	12.9344	12.2332	13.2133	13.652	14.7969	15.5879	15.5898	15.1707	15.3503	14.1954
X7596	0.560195	0.28726	1.30355	-0.149792	1.00985	1.46379	1.22534	0.0201471	-0.560803	-0.765518	-0.618554	-1.04097	-1.60404	-1.13047	159.027	12.813	C5H4N4O	True	2.70534	6.1782e-05	0.0141472	-2.70534	1H,2H,4H-pyrazolo[3,4-d]pyrimidin-4-one	15.7051	15.2517	16.9399	14.5257	16.452	17.206	16.81	14.808	13.843	13.5029	13.747	13.0454	12.11	12.8967
X30971	-0.811311	-1.06304	0.120445	-1.64089	-1.3762	-0.296547	-0.653029	1.00756	1.21276	0.698267	1.29762	1.14758	0.00741731	0.349372	343.202	19.933	C20H26N2O3	False	2.34681	6.17933e-05	0.0141472	2.34681	Compound IV|C06496	18.5938	18.2324	19.9317	17.4027	17.7827	19.3329	18.8211	21.2054	21.5001	20.7613	21.6219	21.4065	19.7694	20.2604
X50192	0.0128519	-0.988737	-0.940605	-1.21981	-0.716982	-1.22485	-0.701316	-0.355265	0.935101	1.49107	1.40412	0.728347	1.08423	0.491843	492.307	43.338	C26H41N3O6	False	1.79811	6.1903e-05	0.0141472	1.79811	L-Leucine, N-[(phenylmethoxy)carbonyl]-L-leucyl-L-leucyl-	15.165	14.0743	14.1267	13.8227	14.3702	13.8172	14.3873	14.7641	16.1692	16.7746	16.68	15.9441	16.3316	15.6866
X35006	0.90767	0.324248	1.29873	0.45079	0.0229063	1.39637	1.43268	-1.3859	-0.555626	-1.34151	-0.448254	-0.634853	-0.249531	-1.21772	375.199	19.771	C22H30O3S	False	1.53032	6.26452e-05	0.0142259	-1.53032	2-(Dodecylsulfanyl)-8-hydroxynaphthalene-1,4-dione	16.4723	15.9366	16.8314	16.0528	15.6599	16.921	16.9544	14.3664	15.1288	14.4072	15.2273	15.056	15.4098	14.5208
X74504	-0.281885	-0.496221	-1.51893	-1.00064	-0.353585	-0.881176	-1.24187	-0.0236015	0.35509	1.17294	0.381975	0.934355	1.61648	1.33707	717.71	22.604	C48H92O3	False	1.812	6.28857e-05	0.0142259	1.812	32-Oxohexatetracont-45-en-10-yl acetate	12.9653	12.7299	11.6067	12.1759	12.8866	12.3071	11.911	13.249	13.6649	14.5632	13.6944	14.3011	15.0503	14.7434
X36651	-0.733148	-0.744949	-1.05463	-0.0234208	-1.15371	-1.75272	-0.222452	0.853675	0.806439	1.58928	0.390719	1.1103	1.02188	-0.0872798	388.22	22.026	C16H29N5O6	False	2.87407	6.46963e-05	0.0145328	2.87407	Leu-Gln-Gln	17.3951	17.3742	16.8262	18.6509	16.6509	15.591	18.2987	20.2029	20.1193	21.5045	19.3837	20.6569	20.5005	18.5379
X11564	-0.362281	-0.0802453	-1.54627	-1.38382	-1.23549	-0.751888	-0.638832	0.782258	0.146331	1.2213	0.615717	1.26528	1.07099	0.896964	198.096	2.76	C6H12O6	True	1.13872	6.52894e-05	0.0145328	1.13872	D-Glucose|C00031	18.8097	18.9971	18.0231	18.131	18.2296	18.5509	18.626	19.5701	19.1476	19.8618	19.4595	19.891	19.762	19.6463
X68328	1.29846	1.55381	0.45072	0.40857	-0.328472	1.52357	0.738729	-1.13338	-0.948775	-0.807344	-0.753494	-1.00476	-1.06593	0.0682931	645.392	20.895	C42H54O4	True	5.26155	6.54261e-05	0.0145328	-5.26155	Thiothece 484	15.4929	16.3258	12.7275	12.59	10.1857	16.2272	13.667	7.5601	8.1623	8.62365	8.79931	7.97968	7.78013	11.48
X28437	-0.416256	-1.343	-0.936563	-0.682369	-0.485938	-1.53105	-0.373232	0.534717	1.26592	1.71435	1.17454	0.849671	0.167056	0.0621433	325.186	21.517	C14H28O8	False	1.80078	6.55466e-05	0.0145328	1.80078	Aleppotrioloside	15.7496	14.737	15.1811	15.4588	15.6735	14.5315	15.7966	16.7887	17.5876	18.0776	17.4878	17.1328	16.387	16.2723
X36796	-0.641751	-0.549597	-0.416321	-1.11579	-0.787705	-0.343365	-1.81468	-0.126341	0.859055	1.18912	1.43219	1.08657	0.030411	1.1982	389.228	19.287	C18H32N2O7	False	3.23038	6.63785e-05	0.0146444	3.23038	(2S,3R,4S,5R,6E)-N-((3S,6S)-2,3,4,5,6,7-hexahydro-6-hydroxy-1-methyl-2-oxoazepin-3-yl)-3,4,5-trihydroxy-2-methoxy-8-methylnon-6-enamide	12.6907	12.8745	13.1402	11.7453	12.3996	13.2857	10.3515	13.7186	15.6838	16.3421	16.8268	16.1375	14.0312	16.3602
X47718	-0.193811	-1.02169	-0.120282	-1.11272	-1.38194	-0.674959	-1.18414	0.0378153	1.36841	1.13669	1.42141	1.23851	0.0706291	0.41608	472.263	19.74	C17H34N4O10	False	2.55912	6.82827e-05	0.0149324	2.55912	Ribostamycin|C01759	15.3589	14.0556	15.4746	13.9123	13.4884	14.6014	13.7998	15.7235	17.8182	17.4535	17.9017	17.6138	15.7752	16.319
X72241	0.0273183	-0.625697	-0.685863	-1.34189	-0.941038	-1.62331	-0.48473	-0.145043	0.801933	1.32128	1.43619	1.09172	0.926018	0.243101	687.369	20.24	C32H52N6O9	False	2.86992	6.84121e-05	0.0149324	2.86992	1,3,5-Triazine-2,4,6(1H,3H,5H)-trione, 1,3,5-tris(6-isocyanatohexyl)-, polymer with 3-ethyl-3-oxetanemethanol and oxirane	15.4347	14.2789	14.1724	13.0113	13.7208	12.5132	14.5284	15.1296	16.8057	17.7249	17.9283	17.3186	17.0253	15.8166
X11998	1.76684	0.428744	1.83799	0.168678	0.584102	0.540186	0.532955	-1.03795	-0.701944	-1.35093	-0.715653	-0.504953	-0.845828	-0.702236	201.148	40.616	C12H20N	True	1.3868	6.91521e-05	0.0149324	-1.3868	Pyridinium, 1-hexyl-4-methyl-	19.3432	18.2347	19.4021	18.0193	18.3634	18.3271	18.3211	17.0198	17.2981	16.7605	17.2868	17.4613	17.1789	17.2979
X53974	0.413225	0.243689	1.02957	0.75492	0.9083	1.31145	1.27336	-0.993492	-0.560384	-1.47571	-0.985179	-1.37123	0.222487	-0.771004	522.774	18.707	C49H69N15O11	False	1.22045	6.93818e-05	0.0149324	-1.22045	w/o MS2:Amaranthipeptide B	14.4666	14.3446	14.9102	14.7126	14.823	15.1131	15.0857	13.4541	13.7658	13.107	13.4601	13.1822	14.3293	13.6142
X15982	0.747986	1.7267	-0.181212	0.587943	1.39511	0.452664	0.976155	0.0330279	-1.23006	-0.722144	-0.538515	-0.960082	-0.906637	-1.38094	235.117	42.19	C9H16N4O2	False	2.25066	6.99369e-05	0.0149324	-2.25066	1,3,5,7-Tetraazabicyclo[3.3.1]nonane, 3,7-diacetyl-	14.6329	15.9842	13.35	14.4119	15.5264	14.2251	14.9479	13.6458	11.9018	12.6031	12.8566	12.2746	12.3484	11.6935
X35884	-0.802512	0.379243	-0.740888	-0.808126	-1.422	-1.34469	-1.0123	0.963549	0.171317	1.14577	1.1617	1.08051	1.16785	0.0605716	382.686	19.428	C4H2Br4O	False	1.82838	7.02013e-05	0.0149324	1.82838	1,3,4,4-tetrabromo-but-3-en-2-one	17.2547	18.5696	17.3233	17.2485	16.5654	16.6515	17.0213	19.2198	18.3383	19.4225	19.4403	19.3499	19.4471	18.2151
X64154	-0.305393	-0.242915	-1.30427	-0.511255	-0.318837	-1.84365	-1.19218	0.212986	0.258981	1.20903	1.39834	0.818626	1.14088	0.679651	606.333	22.257	C28H52N3O7PS	False	2.09351	7.02514e-05	0.0149324	2.09351	(3R,4E)-3-Hydroxy-2-({5-[(3aS,4S,6aR)-2-oxohexahydro-1H-thieno[3,4-d]imidazol-4-yl]pentanoyl}amino)octadec-4-en-1-yl dihydrogen phosphate	13.3638	13.4438	12.0839	13.1	13.3465	11.3927	12.2275	14.028	14.0869	15.3042	15.5468	14.804	15.2169	14.6259
X69716	-0.939406	-0.565104	0.0531194	-0.393054	-0.376905	-1.50197	-1.96426	0.343346	0.393334	0.852653	1.20468	0.879971	0.749787	1.26381	659.33	20.402	C36H48N2O8	False	2.49658	7.03649e-05	0.0149324	2.49658	UCF116-B	11.9553	12.5303	13.4801	12.7946	12.8195	11.091	10.3807	13.926	14.0028	14.7085	15.2493	14.7504	14.5504	15.3401
X43830	-0.0948255	-0.673621	-0.0608531	-0.909514	-0.829547	-1.61508	-1.51429	-0.0936423	0.991092	1.16413	1.10358	0.621317	0.543292	1.36796	442.763	20.704	C10H4Cl8O	False	2.2976	7.14853e-05	0.0150317	2.2976	Oxychlordane|C18146	15.2372	14.4203	15.2851	14.0874	14.2002	13.0916	13.2338	15.2389	16.7698	17.0141	16.9286	16.2479	16.1378	17.3017
X45149	-0.0739602	-0.987806	-1.11066	-1.51888	-0.556069	-1.33265	-0.11334	0.32196	1.16064	0.875708	1.67374	0.912799	0.726266	0.0222576	453.214	20.31	C25H32N4S2	False	2.34577	7.18313e-05	0.0150317	2.34577	4,6-Bis(4'-((2''-(dimethylamino)ethyl)thio)phenyl)-5-methylpyrimidine	12.4421	11.1243	10.9472	10.3585	11.7469	10.627	12.3854	13.0131	14.2225	13.8116	14.9624	13.8651	13.5961	12.5809
X62539	-0.696559	-0.0594499	-0.471311	-0.67325	-0.543134	-1.4374	-1.7881	-0.0556663	0.210541	1.0336	1.20481	0.979187	1.38696	0.90978	592.308	21.203	C25H43N7O8	False	2.79787	7.18445e-05	0.0150317	2.79787	L-Glutaminylglycylglycyl-L-isoleucyl-L-prolyl-L-valine	12.8094	13.9099	13.1985	12.8497	13.0745	11.5298	10.924	13.9165	14.3763	15.798	16.0937	15.704	16.4083	15.5841
X8490	-0.12062	-0.892255	-1.25233	-1.62609	0.284185	-1.11564	-1.02577	0.223363	0.864879	1.15191	0.846886	0.396586	1.26494	0.999945	169.058	2.948	C5H10N2O3	True	1.80488	7.26222e-05	0.0150778	1.80488	2-(2-aminopropanamido)acetic acid	16.8109	15.963	15.5673	15.1566	17.2558	15.7175	15.8162	17.1889	17.8939	18.2093	17.8741	17.3793	18.3335	18.0423
X68111	-0.362545	-1.02173	-0.899024	-0.357638	-0.987518	-0.647101	-1.52076	-0.468182	1.01611	1.57092	1.04769	1.06529	0.727147	0.83734	643.303	20.491	C37H42N2O8	False	1.56124	7.28588e-05	0.0150778	1.56124	Naloxone mixture with oxycodone	15.533	14.9116	15.0273	15.5376	14.9438	15.2648	14.4411	15.4334	16.8327	17.3557	16.8625	16.8791	16.5603	16.6642
X29417	1.60184	1.4795	0.771073	0.752506	0.518242	0.497861	0.290251	-1.27718	-0.737183	-1.5032	-0.93072	-0.578283	-0.920609	0.0359068	332.205	25.644	C15H27N5O2	True	1.24361	7.30797e-05	0.0150778	-1.24361	NSC105767	17.3136	17.2235	16.7019	16.6882	16.5157	16.5007	16.3479	15.1937	15.5913	15.0273	15.4488	15.7083	15.4563	16.1606
X12185	-0.54133	-0.392341	-1.08215	-1.58926	-1.30034	-0.750083	-0.620451	0.927246	0.280402	0.905384	0.764342	1.26212	1.07845	1.05802	203.051	2.83	C6H11N4PS	True	0.872817	7.37628e-05	0.0151188	0.872817	Phosphonothioic dihydrazide, P-phenyl-	19.5218	19.5944	19.2586	19.0118	19.1524	19.4202	19.4833	20.2367	19.9218	20.226	20.1574	20.3997	20.3103	20.3003
X22754	-1.00561	-0.39023	0.535749	-1.37136	-0.75097	-1.24541	-1.3937	0.418693	1.02767	0.0650589	1.28926	0.899823	0.78911	1.13191	285.191	19.892	C13H24N4O3	False	5.6878	7.39569e-05	0.0151188	5.6878	(2S)-N-(carbamoylmethyl)-4-methyl-2-[(2S)-pyrrolidin-2-ylformamido]pentanamide	7.79731	9.97654	13.2557	6.50212	8.69907	6.94814	6.42301	12.8412	14.9977	11.5888	15.9241	14.545	14.1529	15.3668
X39236	-1.17227	-0.391729	-1.02332	-0.641404	0.0143174	-0.307829	-2	0.672477	0.622682	1.39615	0.845292	0.612524	0.388468	1.13145	408.251	19.889	C24H35NO3	False	2.63443	7.48324e-05	0.0151943	2.63443	Ovatine|C08703	12.9709	14.2404	13.2132	13.8343	14.9009	14.3769	11.3859	15.9713	15.8903	17.1484	16.2524	15.8738	15.5094	16.7178
X55846	-0.567496	-1.09334	-2	-0.315283	-0.636871	-0.0834188	-0.789184	0.703584	1.09271	1.44687	1.05101	0.854052	0.388362	0.0874074	537.239	20.971	C33H32N2O5	False	4.85466	7.50082e-05	0.0151943	4.85466	N-[(2S)-1-{[(2S)-2-{[hydroxy(phenyl)methylidene]amino}-3-phenylpropanoyl]oxy}-3-(4-methoxyphenyl)propan-2-yl]benzenecarboximidic acid	11.1182	9.52947	6.37207	11.8801	10.9086	12.5807	10.4484	14.9584	16.134	17.204	16.008	15.413	14.006	13.0968
X66863	-0.372859	-0.652778	-0.884906	-1.04786	-0.871611	-1.91114	0.0115321	-0.0233106	0.675169	1.37739	1.23171	1.07653	0.963316	0.428821	631.314	20.696	C38H44N2O5	False	1.8657	7.64762e-05	0.0154215	1.8657	1-{4-[1-(4-hydroxy-phenethyl)-6-methoxy-2-methyl-1,2,3,4-tetrahydro-isoquinolin-7-yloxy]-phenethyl}-6-methoxy-2-methyl-1,2,3,4-tetrahydro-isoquinolin-7-ol	15.0397	14.7207	14.4561	14.2704	14.4713	13.2865	15.4778	15.438	16.2341	17.0344	16.8684	16.6915	16.5625	15.9533
X24719	-1.70807	-0.255886	-0.439665	-0.704465	-1.38123	-0.695278	-0.808324	1.74931	0.759167	0.808196	0.987775	0.628428	0.355699	0.704346	299.218	47.561	C13H26N6O2	True	1.09978	7.69644e-05	0.0154501	1.09978	N~1~,N~3~-Bis(4-methylpiperazin-1-yl)propanediamide	18.1653	19.098	18.98	18.8099	18.3752	18.8158	18.7432	20.3859	19.75	19.7815	19.8968	19.666	19.4908	19.7148
X43607	-0.891539	-0.120588	-0.67103	-1.33831	-1.53738	-0.62291	-0.509673	0.99053	0.49383	1.41407	1.43318	1.27307	0.175418	-0.0886692	441.22	19.614	C17H25N7O6	False	2.19025	7.74589e-05	0.0154796	2.19025	Deaminohydroxyblasticidin S|C03860	17.2554	18.2938	17.5524	16.6536	16.3855	17.6172	17.7697	19.7904	19.1214	20.3608	20.3866	20.1709	18.6925	18.3368
X43553	-0.93902	-0.479017	-1.34747	-0.0542733	-0.378958	-0.688125	-1.774	0.17724	0.353745	1.5829	0.327735	0.850688	1.12216	1.24641	440.765	21.417	C10H5Cl9	False	2.56142	7.98148e-05	0.0158792	2.56142	trans-Nonachlor|C18145	12.0296	12.7581	11.3827	13.4307	12.9165	12.4269	10.7072	13.7974	14.0769	16.0235	14.0357	14.8639	15.2938	15.4906
X49980	-1.41682	-0.576944	-0.395152	-0.434367	0.015152	-0.991708	-1.9941	0.859669	1.02142	0.943986	0.970327	0.7591	1.0644	0.175043	490.276	20.235	C23H35N7O5	False	1.49432	8.07365e-05	0.0159912	1.49432	L-Phenylalanine, L-alanyl-L-arginyl-L-prolyl-	14.6079	15.3661	15.5302	15.4948	15.9005	14.9917	14.0868	16.6629	16.8089	16.739	16.7628	16.5721	16.8477	16.0449
X12191	-0.411	-0.317764	-1.47298	-1.47174	-1.22285	-0.766152	-0.41628	0.660633	0.314455	1.27725	0.647517	1.36962	1.04636	0.762932	203.052	2.767	C6H11N4PS	True	0.995304	8.12275e-05	0.016015	0.995304	Phosphonothioic dihydrazide, P-phenyl-	19.6534	19.7069	19.0448	19.0456	19.1882	19.4499	19.6504	20.2676	20.0692	20.6209	20.26	20.6739	20.4886	20.3262
X43052	-0.960991	-1.39226	-1.3049	-0.48088	-0.990624	-0.824933	-0.515016	0.915269	1.06253	0.846492	0.531192	0.936547	1.26709	0.91049	437.193	44.546	C18H31N4O5P	False	0.775624	8.17119e-05	0.016015	0.775624	Phosphoric acid--N~1~,N~1~-diethyl-N~4~-(6-methoxyquinazolin-4-yl)pentane-1,4-diamine (1/1)	16.7577	16.5768	16.6134	16.9592	16.7453	16.8148	16.9449	17.545	17.6068	17.5162	17.3839	17.5539	17.6926	17.543
X18596	1.26936	1.2784	0.176106	0.280636	0.427646	0.942755	1.2265	-1.42998	-1.23003	-0.901723	-0.134517	0.351445	-1.05747	-1.19913	255.075	29.847	C10H17O4P	False	6.10276	8.19345e-05	0.016015	-6.10276	1,3-Propanediol, 2-cyclohexyl-2-(hydroxymethyl)-, cyclic phosphate (1:1)	18.4785	18.513	14.3096	14.7082	15.2688	17.2331	18.3151	8.18522	8.94767	10.1996	13.1252	14.9783	9.60567	9.0655
X53577	1.18757	0.596995	0.0488753	0.587509	1.64964	0.65713	0.873549	-0.929924	-1.68197	-0.200073	-1.58101	-0.300688	-0.79569	-0.11191	519.058	45.593	C21H20O12S	False	5.7723	8.26097e-05	0.0160587	-5.7723	{[6-(5,7-dihydroxy-4-oxo-2-phenyl-4H-chromen-6-yl)-3,4,5-trihydroxyoxan-2-yl]methoxy}sulfonic acid	15.9383	13.8082	11.8312	13.7739	17.6049	14.0251	14.8056	8.30076	5.58821	10.9332	5.95237	10.5703	8.78493	11.2512
X24282	-0.788311	-0.0401298	-0.0614058	-0.857479	-1.0302	-2	-0.70226	0.363491	0.860361	0.805349	1.50149	1.03809	0.511758	0.557442	296.177	20.3	C17H26ClNO	False	2.93338	8.28791e-05	0.0160587	2.93338	Pyridine, 1,2,3,6-tetrahydro-1-(2-(thymyloxy)ethyl)-, hydrochloride	11.9858	13.3482	13.3095	11.8598	11.5453	9.49121	12.1425	14.0832	14.988	14.8878	16.1555	15.3117	14.3532	14.4364
X31945	1.21759	1.32129	0.712349	0.485807	0.887817	1.08907	-0.11966	-1.01808	-0.75125	-1.32851	-1.03299	-0.403329	-1.50015	0.440045	351.154	32.763	C16H20N6O2	False	7.27513	8.36471e-05	0.0161374	-7.27513	Pyrazinecarboxamide, N,N'-1,6-hexanediylbis-	17.0754	17.5474	14.7757	13.7446	15.5744	16.4904	10.9887	6.89948	8.11397	5.48651	6.83161	9.69758	4.70526	13.5363
X46295	-0.600243	-0.647343	-0.939381	-0.561846	-0.457214	-0.623791	-1.83202	-0.426673	0.292314	1.03112	1.3057	1.04185	1.32028	1.09725	462.222	20.645	C21H33N3O7	False	2.37132	8.43291e-05	0.0161988	2.37132	1-(2-morpholin-4-ylethyl)-3-(2,5,8,11,14-pentaoxabicyclo[13.4.0]nonadeca-1(15),16,18-trien-17-yl)urea	13.3307	13.2617	12.8336	13.387	13.5404	13.2962	11.5251	13.5851	14.6391	15.7221	16.1246	15.7378	16.146	15.819
X50278	-1.89409	-0.785639	-0.99263	-0.394005	-1.33711	-0.00353917	-0.362544	1.06823	0.747907	1.47401	0.858183	0.943955	0.287255	0.390016	493.277	21.511	C25H42O8	False	1.5462	8.5085e-05	0.0162363	1.5462	Gaudichaudioside B	16.5606	17.6003	17.4061	17.9676	17.083	18.3339	17.9971	19.3392	19.0387	19.7198	19.1421	19.2226	18.6066	18.703
X36685	0.506857	-0.651486	-1.30796	-0.291114	-1.23047	-1.31823	-1.30435	0.0301642	0.953354	0.815301	0.83559	0.489715	1.22003	1.25261	388.304	36.428	C17H37N7O3	False	5.5187	8.52529e-05	0.0162363	5.5187	(S)-form-Gusperimus, INN	13.2911	9.29348	7.02786	10.5372	7.29529	6.99242	7.04034	11.646	14.8321	14.3556	14.4257	13.232	15.7524	15.8649
X81390	-1.03176	-1.79884	-0.0423221	-0.695107	-0.574583	-1.11886	-0.574402	0.685791	1.39131	1.1822	0.590499	1.37264	0.504359	0.109082	876.431	25.266	C40H59N11O10	False	1.33058	8.65532e-05	0.0164138	1.33058	FGERAFK	12.2825	11.6704	13.0721	12.5512	12.6474	12.213	12.6475	13.6532	14.2162	14.0493	13.5771	14.2013	13.5084	13.1929
X34413	-1.47545	-0.37037	-0.445687	-0.738328	-1.62399	-1.0601	0.0521838	1.23006	0.78187	1.20658	0.924704	0.794016	1.0142	-0.289675	370.294	41.016	C19H41NO4	True	2.27103	8.76003e-05	0.016542	2.27103	N-Decyl-2,5,8,11-tetraoxatridecan-13-amine	17.9996	19.551	19.4453	19.0344	17.791	18.5827	20.1442	21.7979	21.1686	21.7649	21.3692	21.1857	21.4948	19.6643
X38002	-1.71437	-0.30689	-0.467599	-0.417155	-0.422861	-0.597121	-1.79498	0.821755	0.652514	1.62927	0.41247	0.472924	0.576679	1.15536	398.74	21.4	C8Cl8	False	1.73712	8.87718e-05	0.0166925	1.73712	Octachlorostyrene|C18148	13.1384	14.6342	14.4634	14.517	14.511	14.3258	13.0528	15.8337	15.6538	16.6919	15.3987	15.463	15.5732	16.1882
X53732	-0.904672	-0.558892	-0.265647	-0.58158	-0.828047	-0.405377	-2	-0.154756	0.836323	1.12329	1.19346	1.00032	0.297488	1.33125	520.309	21.109	C29H45NO5S	False	2.79354	9.02069e-05	0.0168911	2.79354	(4S,5R,7R,8S,9S,11R,15Z,18S)-4,8-dihydroxy-5,7,9,11,15-pentamethyl-18-[(1E)-1-(2-methyl-1,3-thiazol-4-yl)prop-1-en-2-yl]-1-oxacyclooctadec-15-ene-2,6-dione	13.5068	14.1076	14.6171	14.0681	13.6399	14.3743	11.4592	14.8097	16.5317	17.0303	17.1522	16.8166	15.5955	17.3916
X60179	-0.554878	-0.402338	-0.95915	-0.412154	-0.807296	-1.23391	-1.37577	0.0231482	-0.0196952	1.62564	1.05336	1.04995	1.50229	0.510807	572.31	21.865	C36H43O6	False	1.57572	9.25334e-05	0.0172506	1.57572	4-[({3-Ethyl-4'-({[(2R)-heptan-2-yl]oxy}carbonyl)-2'-[(2R)-hexan-2-yl][1,1'-biphenyl]-4-yl}oxy)carbonyl]benzoate	15.0792	15.2256	14.6911	15.2162	14.8369	14.4274	14.2912	15.634	15.5929	17.1722	16.6229	16.6197	17.0538	16.1021
X36699	-1.43469	-1.55402	-0.454335	0.298002	-0.636466	-0.997473	-0.872944	1.1066	1.11963	0.831111	-0.125137	0.528351	1.41557	0.775808	388.305	39.19	C17H37N7O3	True	2.25259	9.29014e-05	0.0172506	2.25259	(S)-form-Gusperimus, INN	16.1231	15.9566	17.4906	18.5401	17.2366	16.733	16.9067	19.668	19.6862	19.2837	17.9498	18.8614	20.099	19.2066
X77557	-1.03155	-0.268324	-0.207745	-0.369774	-1.24242	-0.39772	-2	-0.0802706	1.03383	1.04552	1.07261	1.10788	0.640378	0.794094	767.366	20.075	C35H58O18	False	2.96223	9.3721e-05	0.0173306	2.96223	Periplocae oligosaccharide D2	14.2688	15.6782	15.7901	15.4909	13.8793	15.4393	12.302	16.0255	18.083	18.1046	18.1546	18.2198	17.3564	17.6403
X57543	-0.342361	-0.832616	-0.642919	-1.0909	-1.13422	-1.23133	-0.365993	-0.411114	0.671999	1.40448	1.37548	1.19311	1.31637	0.089999	550.805	20.538	C53H77N15O11	False	2.37356	9.43666e-05	0.0173779	2.37356	w/o MS2:[Val9]-moroidin-[QLLVWRAH]	16.0677	15.3456	15.625	14.9652	14.9014	14.7584	16.0329	15.9665	17.5617	18.6406	18.5979	18.3293	18.5108	16.7045
X43610	-0.464615	-0.914976	-0.118801	-1.43113	-1.60875	-0.255853	-0.867217	0.584307	0.997515	0.997008	1.46962	1.40226	0.118834	0.0917999	441.22	19.521	C17H25N7O6	False	2.04698	9.72872e-05	0.017842	2.04698	Deaminohydroxyblasticidin S|C03860	18.1023	17.5324	18.5399	16.8792	16.6544	18.3665	17.5928	19.4297	19.9527	19.952	20.5501	20.4649	18.8407	18.8065
X27617	0.682369	0.782392	1.52993	1.76404	0.479682	-0.152879	0.588606	-0.61931	-0.931656	-1.26954	-1.39796	-0.912188	-0.0813689	-0.462108	319.128	33.978	C15H16N6O	False	1.91453	9.8468e-05	0.0179845	-1.91453	Amicarbalide	15.0229	15.141	16.0238	16.3003	14.7835	14.0365	14.9122	13.4857	13.1168	12.7178	12.5661	13.1398	14.121	13.6713
X14147	0.366105	1.58872	0.644343	0.572855	1.06257	0.983025	0.423359	-0.00446572	-0.725459	-1.01834	-2	-0.769773	-0.93769	-0.117633	220.19	46.856	C14H22ClNO	False	2.23513	9.90162e-05	0.0180108	-2.23513	w/o MS2:MLS002153168-01!(S)-()-3-(3-Hydroxyphenyl)-N-propylpiperidine hydrochloride	15.0741	16.7696	15.46	15.3608	16.0399	15.9296	15.1535	14.5602	13.5603	13.1541	11.699	13.4988	13.266	14.4032
X1940	-0.812135	-0.482049	-1.37993	-1.4557	-0.2933	-0.839304	-0.895368	1.02679	0.697334	1.07774	0.105452	0.708698	1.42398	1.11779	90.055	2.931	C3H7NO2	True	0.896041	0.000101022	0.0182744	0.896041	1-Nitropropane	16.9999	17.168	16.7107	16.6721	17.2641	16.9861	16.9575	17.9364	17.7687	17.9624	17.4672	17.7744	18.1387	17.9828
X11879	-0.0305471	1.31505	0.791949	1.16548	0.845584	0.789326	0.795634	0.0518216	-0.928557	-1.36544	-1.92203	-0.68574	-0.209993	-0.612541	200.2	49.195	C12H25NO	False	1.88424	0.000101285	0.0182744	-1.88424	(2R,3S)-clavaminol B	16.1243	17.6887	17.0805	17.5148	17.1429	17.0775	17.0848	16.2201	15.0803	14.5724	13.9253	15.3626	15.9157	15.4477
X2990	0.274983	-1.08151	-1.82274	-0.470087	-0.910704	-0.400978	-1.15994	0.23085	1.07236	1.41594	1.10554	1.07298	0.52028	0.153026	104.061	19.997	CH5N5O	False	4.29076	0.000102889	0.0184211	4.29076	2H-Tetrazol-5-amine--water (1/1)	12.2292	8.57246	6.57435	10.2207	9.03291	10.407	8.36105	12.1102	14.3786	15.3048	14.4681	14.3803	12.8904	11.9004
X38938	-0.724608	-0.977512	0.118488	-1.16185	-1.51357	-0.547967	-0.833368	0.137462	1.24092	1.09744	1.46763	1.31834	-0.0781332	0.456739	406.226	20.089	C22H32ClN3O2	False	2.15108	0.000102925	0.0184211	2.15108	Piboserod hydrochloride	15.9283	15.5907	17.0537	15.3447	14.8752	16.1641	15.7832	17.079	18.5519	18.3604	18.8545	18.6552	16.7912	17.5052
X69789	1.55021	0.922474	-0.611578	0.464799	0.991094	0.750879	1.48895	-1.13233	-0.845971	-0.572933	-0.804655	-0.0189898	-0.952368	-1.22958	660.142	25.997	C32H27N7O4S2	False	6.06819	0.000104397	0.018586	-6.06819	4-{(E)-[3,5-Bis(4-methoxyphenyl)-1-phenyl-1H-pyrazol-4-yl]diazenyl}-N-(5-methyl-1,3,4-thiadiazol-2-yl)benzene-1-sulfonamide	15.8718	13.4725	7.60925	11.7233	13.7348	12.8167	15.6376	5.6189	6.71338	7.75695	6.87129	9.87417	6.30672	5.24719
X69532	0.174416	-0.827443	-0.593887	-1.03502	-1.24955	-0.742681	-1.3857	-0.444383	0.964826	1.2658	1.26702	1.12921	0.488251	0.989133	657.322	20.361	C32H44N6O9	True	1.93171	0.000104681	0.018586	1.93171	Enkephalin-leu, ala(2)-ser(6)-	16.5887	15.3919	15.6709	15.1439	14.8877	15.4932	14.725	15.8495	17.5329	17.8924	17.8938	17.7292	16.9636	17.5619
X28037	-1.03906	-0.61414	-0.41857	-0.947347	-0.978233	-0.551253	-1.06728	0.735588	0.95016	1.44127	1.43335	0.986569	-0.837097	0.906047	322.168	21.262	C17H24ClN3O	False	2.40055	0.000106127	0.018768	2.40055	1,2-Ethanediamine, N-[(4-methoxyphenyl)methyl]-N',N'-dimethyl-N-2-pyridinyl-, monohydrochloride	13.363	13.9988	14.2913	13.5002	13.454	14.0928	13.3208	16.0181	16.3391	17.0738	17.062	16.3936	13.6652	16.2731
X60167	-0.760465	-0.26655	-0.783948	-0.288415	-0.582591	-1.02205	-1.9057	0.0504015	-0.138836	1.30934	1.0632	1.32443	0.916655	1.08453	572.266	19.734	C28H42ClNO9	False	2.47042	0.000107212	0.018885	2.47042	(1S,5R)-5-{(1E,3E)-5-[(2S,3S,5R,6R)-5-{[(2Z,4S)-4-(acetyloxy)pent-2-enoyl]amino}-3,6-dimethyltetrahydro-2H-pyran-2-yl]-3-methylpenta-1,3-dien-1-yl}-1,5-anhydro-1-(carboxymethyl)-3-C-(chloromethyl)-2-deoxypentitol	13.0927	13.854	13.0565	13.8203	13.3669	12.6895	11.3275	14.3425	14.0508	16.283	15.9036	16.3062	15.6777	15.9365
X43750	-2	-0.41626	0.178528	-1.10374	-0.704011	-0.950628	-0.611261	0.658495	0.810666	1.05015	1.27662	0.973878	0.872509	0.0313529	442.252	19.088	C27H36ClNO2	False	1.78615	0.000108049	0.0189575	1.78615	1-[4-(Benzyloxy)naphthalen-1-yl]-2-(dibutylamino)ethan-1-ol--hydrogen chloride (1/1)	12.6103	14.4284	15.0838	13.6709	14.1113	13.8396	14.2135	15.6126	15.7803	16.0441	16.2937	15.9601	15.8484	14.9216
X61842	-0.266012	-0.533643	-0.174641	-0.43177	-0.811307	-1.8503	-1.61708	0.162529	0.915409	1.15809	1.29306	1.09786	0.318658	0.739158	586.8	19.442	C15H20Br4O3	False	1.71236	0.000108709	0.0189822	1.71236	(2S,3R,5R)-2-[(R)-bromo[(2R,3R,5S,6R)-3,5-dibromo-6-ethyloxan-2-yl]methyl]-5-[(1R)-1-bromoprop-2-yn-1-yl]oxolan-3-ol	14.6109	14.3288	14.7073	14.4362	14.036	12.9407	13.1865	15.0627	15.8565	16.1123	16.2546	16.0488	15.2273	15.6706
X75491	-0.322434	-0.561	-0.552277	0.164048	-0.855431	-1.76478	-1.67052	0.191005	0.898366	0.711008	0.297632	0.839968	1.1991	1.42532	732.389	23.393	C37H59NO12	False	3.98097	0.000109748	0.0189822	3.98097	dideacetylprotoveratrine	11.1504	10.5528	10.5746	12.369	9.81526	7.53741	7.77353	12.4365	14.2084	13.7391	12.7036	14.0621	14.9617	15.5284
X1812	1.47263	1.33708	0.0875854	-0.0652869	0.88942	0.421694	1.40572	-0.794636	-0.817591	-0.806213	-0.100829	-0.421539	-0.780559	-1.82748	88.0075	6.824	C2HNO3	False	5.57012	0.000110116	0.0189822	-5.57012	Ethenone, nitro-	16.1662	15.69	11.3	10.7629	14.1172	12.4738	15.9311	8.20036	8.11971	8.15968	10.638	9.5112	8.24982	4.57155
X41613	-0.126376	-1.27852	-1.0569	-1.04593	-0.272715	-0.538387	-1.57372	0.130861	1.13452	1.30792	0.794844	0.319643	0.859238	1.34552	426.297	39.984	C25H41NO3	True	1.12746	0.000110144	0.0189822	1.12746	(2S)-2-[(1-hydroxyhexadecylidene)amino]-3-phenylpropanoic acid	17.7425	16.9709	17.1193	17.1266	17.6445	17.4665	16.7732	17.9147	18.5868	18.703	18.3594	18.0411	18.4025	18.7281
X59926	-0.657812	-0.245124	0.357364	-0.69647	-1.39368	-0.946005	-1.98304	0.126723	0.994857	0.63865	1.02677	1.16261	0.8269	0.788259	570.318	19.883	C34H45NO5	False	3.74851	0.000110328	0.0189822	3.74851	petuniasterone C 22-nicotinate	14.8132	15.7862	17.2067	14.7221	13.0783	14.1338	11.6888	16.6629	18.7096	17.8698	18.7849	19.1052	18.3137	18.2226
X27051	0.0210672	-0.778756	-1.4537	-0.689336	-0.921195	-0.729288	-1.10312	-0.361734	0.50018	1.72136	1.26672	1.12534	0.634899	0.767565	315.201	20.796	C12H28N4O4	False	1.88636	0.000110745	0.0189822	1.88636	1,7,11,17-Tetraoxa-2,6,12,16-tetraazacycloicosane	17.4667	16.5328	15.7447	16.6372	16.3665	16.5906	16.1541	17.0198	18.0262	19.4521	18.9212	18.7561	18.1835	18.3384
X29025	-0.129738	-0.141414	-0.109841	-0.491352	-1.0325	-2	-1.44178	0.410135	0.758445	0.692694	0.944773	1.01533	0.73227	1.0017	329.217	20.459	C14H26N8	False	4.24625	0.000111968	0.0191182	4.24625	N'',N'''-Decane-1,10-diylbis(N-cyanoguanidine)	15.3641	15.3328	15.4173	14.3967	12.949	9.80227	11.8541	16.8084	17.7402	17.5643	18.2386	18.4274	17.6702	18.3909
X31000	-1.36297	-0.277446	-1.04642	-0.589398	-1.44957	-1.02465	-0.313487	1.63265	0.944172	1.12214	0.866657	0.504598	0.666927	0.3268	343.244	47.532	C15H30N6O3	True	0.940925	0.000113476	0.0192659	0.940925	N,N'-(1,3-Dimethyl-2-oxoimidazolidine-4,5-diyl)bis(N'-tert-butylurea)	16.9739	17.5635	17.1459	17.3941	16.9269	17.1577	17.5439	18.6008	18.2269	18.3236	18.1848	17.9882	18.0763	17.8916
X54854	-1.69263	-0.0998323	-0.715746	-0.313334	-1.59169	-0.851152	-0.369622	1.31516	0.247439	0.6943	0.77561	1.17199	1.36676	0.0627391	529.288	19.935	C23H38N8O5	False	2.01321	0.000113697	0.0192659	2.01321	Val-Leu-Arg-p-nitroanilide	17.0205	19.0125	18.2422	18.7455	17.1467	18.0729	18.6751	20.7822	19.4469	20.0057	20.1074	20.6032	20.8468	19.2159
X16041	1.40862	1.55687	0.247382	-0.0760492	0.508131	0.69906	1.19308	-0.926225	-0.749719	-0.733101	0.0306806	-0.211834	-1.54159	-1.40531	235.189	38.404	C11H24N4	True	6.65882	0.00011467	0.019357	-6.65882	Piperazine, 1,1'-methylenebis(4-methyl-	16.7022	17.3262	11.8145	10.4532	12.912	13.7156	15.795	6.87474	7.61766	7.68761	10.9024	9.88164	4.28465	4.85825
X55477	-1.31308	-0.0233148	-0.90761	-0.00980025	-0.773485	-1.85345	-0.708684	1.1393	0.589596	1.31833	0.680143	0.591857	1.31054	-0.0403416	534.254	22.735	C23H37N5O8	False	2.58884	0.000115171	0.0193683	2.58884	N-(2,4-Dinitrophenyl)-L-glutamic acid--cyclohexanamine (1/2)	15.1809	17.2717	15.8382	17.2936	16.0556	14.3049	16.1607	19.1564	18.2653	19.4467	18.4121	18.269	19.434	17.2441
X55226	-1.00349	-0.775544	0.0507506	-0.252531	-0.97455	-0.433568	-2	0.886149	1.16362	0.858152	0.943428	1.09466	-0.124682	0.729835	532.293	19.442	C33H39N3O2	False	3.93368	0.000116727	0.0194319	3.93368	2-[bis(2,4-dimethylphenyl)-1,3,5-triazin-2-yl]-5-(octyloxy)phenol	15.0587	15.6241	17.6735	16.9213	15.1305	16.4723	12.1849	19.7454	20.4336	19.676	19.8875	20.2626	17.2384	19.3577
X64132	0.0385604	-0.671791	-0.106068	-1.5243	-1.31731	-1.60832	-0.39767	0.230359	0.896357	0.815171	1.26567	1.48558	0.485707	0.408066	606.275	19.027	C21H41N7O12	False	2.56891	0.000117236	0.0194319	2.56891	Dihydrostreptomycin|C01023	15.6269	14.4837	15.3941	13.1117	13.4448	12.9765	14.9248	15.9355	17.0074	16.8767	17.6017	17.9556	16.3465	16.2215
X35881	-0.507722	-0.0315455	-0.525743	-1.62833	-1.4056	-0.938992	-0.575735	0.809469	0.657028	1.11094	1.57072	1.32682	0.251122	-0.112426	382.686	19.335	C4H2Br4O	False	2.14764	0.000117934	0.0194319	2.14764	1,3,4,4-tetrabromo-but-3-en-2-one	17.306	17.9436	17.2819	15.8055	16.1037	16.7285	17.2149	19.0697	18.8656	19.4734	20.089	19.7624	18.3221	17.8353
X29262	0.507494	0.64584	1.27367	0.58185	0.529743	1.72236	0.475382	-0.439817	-1.02881	-1.95985	-0.598306	-0.932706	-0.0217944	-0.755055	331.173	20.186	C14H28O7	False	1.42482	0.000118045	0.0194319	-1.42482	2-(hydroxymethyl)-6-[(3-hydroxyoctyl)oxy]oxane-3,4,5-triol	14.3032	14.4235	14.9693	14.3678	14.3225	15.3593	14.2753	13.4797	12.9676	12.1582	13.3419	13.0512	13.8431	13.2056
X40601	-0.218938	-0.956669	-0.706967	-0.762632	-0.794659	-0.947276	-1.29311	-0.3317	0.65711	1.33089	1.7184	0.963771	0.0966671	1.24511	419.25	20.947	C18H34N4O7	False	1.64489	0.000118224	0.0194319	1.64489	L-Seryl-L-threonyl-L-valyl-L-leucine	15.1895	14.4418	14.6948	14.6384	14.606	14.4513	14.1008	15.0752	16.0774	16.7603	17.153	16.3882	15.5094	16.6733
X37200	0.614416	0.595838	0.732679	0.205112	1.76456	1.09414	0.573879	-0.252293	-0.592919	-2	-0.272341	-0.651431	-1.1536	-0.53175	392.252	30.933	C19H35N3O4	False	2.66103	0.00011837	0.0194319	-2.66103	N-[3-(Decyloxy)-2-hydroxypropyl]-L-histidine	13.8862	13.8552	14.0836	13.2031	15.8057	14.6869	13.8186	12.4398	11.8713	9.31221	12.4063	11.7736	10.9356	11.9734
X42390	-0.873878	-1.28207	-1.47095	-1.11672	-0.172947	-0.843861	-0.619661	0.546557	0.895747	0.902124	1.04339	0.785754	1.08702	1.1195	432.202	43.542	C23H26O7	False	0.769461	0.000118601	0.0194319	0.769461	Neoisostegane|C10707	17.0384	16.8661	16.7864	16.9359	17.3343	17.0511	17.1457	17.638	17.7854	17.7881	17.8477	17.739	17.8662	17.8799
X20190	-0.766004	-0.916907	-1.42682	-0.111631	-1.32156	-0.630717	-0.368589	1.71279	0.557698	1.29443	0.865842	0.527735	-0.458223	1.04195	267.144	20.686	C8H25N2O4P	False	4.23203	0.000119948	0.0195446	4.23203	Phosphoric acid--butan-1-amine (1/2)	8.08022	7.67692	6.31413	9.82909	6.59545	8.44179	9.14235	14.705	11.6179	13.5869	12.4415	11.5379	8.9028	12.9122
X40461	-0.923715	-2	-0.295735	-0.527341	-0.58662	-0.214115	-0.734158	0.867947	0.907805	0.653889	0.676449	0.426775	0.523966	1.56596	418.242	43.188	C19H41NO3S2	True	2.01364	0.000120167	0.0195446	2.01364	Ethanethiol, 2-heptadecylamino-, hydrogen sulfate (ester)	17.3202	15.5436	18.1073	17.817	17.7427	18.2096	17.5578	19.5659	19.6159	19.2976	19.3259	19.0129	19.1348	20.4408
X65893	-0.623161	0.336079	-1.28777	-0.478273	-0.443539	-1.35457	-1.71774	0.209813	0.126309	1.30098	0.890612	0.9946	1.02822	1.01844	622.301	20.755	C35H45NO10	False	2.8235	0.000121398	0.0196731	2.8235	Protorifamycin I|C12246	11.5028	13.205	10.3234	11.7599	11.8215	10.2049	9.56044	12.9809	12.8327	14.9172	14.189	14.3735	14.4332	14.4158
X24741	0.609864	1.33121	1.70945	0.106656	1.46298	0.149901	0.475099	-0.494526	-0.642402	-1.20205	-0.591438	-1.37965	-0.75778	-0.777314	299.257	47.477	C18H36O4	True	1.1611	0.000123007	0.0198366	-1.1611	(9R,10R)-Dihydroxyoctadecanoic acid|C08314	17.5719	18.0734	18.3363	17.222	18.165	17.2521	17.4782	16.804	16.7012	16.3121	16.7366	16.1886	16.621	16.6074
X21645	-2	-1.09698	-0.511306	-0.137891	-1.11654	-0.456905	-0.441569	1.43915	0.946363	0.761352	0.682624	0.814752	0.614099	0.610055	277.236	47.59	C14H30N4	True	1.12489	0.000123297	0.0198366	1.12489	1,4,8,11-Tetraazabicyclo[9.5.2]octadecane	17.575	18.2528	18.6457	18.8962	18.2396	18.6822	18.6925	19.9542	19.6236	19.4995	19.4467	19.5353	19.4007	19.398
X55222	-0.668837	-0.504899	-0.329298	-0.628433	-1.42715	-1.23998	-0.784682	0.781392	1.15683	1.33268	1.4337	1.31468	-0.234446	-0.201553	532.293	19.486	C33H39N3O2	False	2.39046	0.000125515	0.0200573	2.39046	2-[bis(2,4-dimethylphenyl)-1,3,5-triazin-2-yl]-5-(octyloxy)phenol	17.5687	17.8144	18.0775	17.6293	16.4324	16.7129	17.3951	19.7419	20.3045	20.568	20.7194	20.541	18.2197	18.2689
X30330	-2	-0.548869	-0.651166	-0.120491	-1.16923	-0.57582	-0.716146	1.29193	0.653335	0.727549	0.699058	0.845897	0.767483	0.964434	338.289	47.573	C16H37N5O	True	1.02034	0.000125569	0.0200573	1.02034	Octanamide, N-[2-[[2-[[2-[(2-aminoethyl)amino]ethyl]amino]ethyl]amino]ethyl]-	17.0747	18.0465	17.9851	18.3036	17.6742	18.0303	17.9461	19.1514	18.7681	18.8127	18.7956	18.8837	18.8366	18.9549
X21912	-0.209444	-0.278824	-0.710975	-0.89201	-0.920989	-0.926936	-1.7227	-0.0918715	0.350733	1.48407	1.33459	1.276	0.264958	1.04339	279.185	20.594	C19H24N2O	False	1.66658	0.000126491	0.0201324	1.66658	Antirhine|C09033	15.3888	15.3173	14.8721	14.6856	14.6558	14.6496	13.8298	15.51	15.9659	17.1335	16.9795	16.9192	15.8776	16.6795
X68115	-0.289147	-1.14617	-0.85205	-0.220668	-1.02373	-0.513265	-1.61963	-0.454219	1.16465	1.51357	0.930539	1.0498	0.678041	0.782282	643.304	20.445	C42H42O6	False	1.61947	0.000130522	0.0207001	1.61947	(3aR,4R,5R,6R,7S,7aR)-4,7-Bis(benzyloxy)-2,2-dimethyl-6-(triphenylmethoxy)hexahydro-2H-1,3-benzodioxol-5-ol	15.5602	14.7026	14.9969	15.6287	14.8252	15.3359	14.2289	15.395	17.0149	17.364	16.7806	16.9	16.528	16.6323
X33010	0.0737018	-0.00398779	0.632406	1.22387	1.21401	0.966653	1.48521	0.102056	-0.52319	-1.63358	-1.14511	-1.21297	-0.427887	-0.751182	359.186	21.014	C22H22N4O	False	2.1411	0.000131711	0.0207747	-2.1411	Phenol, 4-(1,1-dimethylethyl)-2-[[4-(phenylazo)phenyl]azo]-	15.5317	15.4276	16.2804	17.0731	17.0599	16.7284	17.4233	15.5697	14.7318	13.2437	13.8983	13.8074	14.8595	14.4262
X39718	-0.437779	-0.59147	-0.980046	0.173544	-1.14685	-1.90942	-0.702004	0.101201	0.515812	1.63827	0.877376	1.08528	0.970248	0.405848	412.227	20.979	C28H29NO2	False	2.11166	0.000131999	0.0207747	2.11166	Triethylamine, 2-(p-(3,4-diphenyl-2-furyl)phenoxy)-	15.7442	15.5411	15.0278	16.5519	14.8074	13.7999	15.3951	16.4563	17.0041	18.4871	17.4818	17.7564	17.6045	16.8588
X49675	-1.2087	-0.0986517	0.0422572	-2	-1.1083	-0.789946	-0.325128	1.13186	0.973454	0.860703	1.29391	0.834468	0.31149	0.112304	488.229	21.246	C26H27N9	False	4.75008	0.000132391	0.0207747	4.75008	(1,2,4)Triazolo(1,5-a)pyrimidine, 7-propyl-5-(1-pyrrolidinyl)-6-((2'-(1H-tetrazol-5-yl)(1,1'-biphenyl)4-yl)methyl)-	9.98136	13.3257	13.7503	7.50781	10.2838	11.243	12.6434	17.0331	16.5558	16.2161	17.5213	16.1371	14.5614	13.9613
X9638	-0.511878	-2	0.0332247	-0.335703	-1.13548	-0.69135	-0.802826	0.313749	1.04757	0.0668927	1.17707	0.734716	1.30994	0.920795	180.174	36.838	C12H21N	True	2.37007	0.000134403	0.0210164	2.37007	N-Cyclooctyl-2,3-Dihydro-1H-pyrrole	17.4483	15.0437	18.26	17.7107	16.5197	17.1811	17.0151	18.6777	19.7705	18.3101	19.9633	19.3046	20.1611	19.5817
X36913	-0.611367	-0.851312	0.0597741	-0.0465798	-1.0064	-1.0341	-2	0.0471399	1.30296	1.10146	0.357992	0.973852	0.890373	0.879571	390.223	20.87	C16H29N7O3	False	2.68219	0.00013508	0.0210485	2.68219	N~5~-(Diaminomethylidene)-L-ornithyl-L-prolyl-L-prolinamide	13.3724	12.9668	14.5069	14.3271	12.7046	12.6578	10.9179	14.4856	16.6085	16.2678	15.0111	16.0521	15.911	15.8928
X54842	0.96106	-0.0527883	0.927946	0.89917	0.186686	1.27638	1.4528	-0.978855	-0.108441	-0.997186	-0.598662	-0.043436	-1.34413	-1.58054	529.228	22.833	C27H30F6N2O2	False	1.64029	0.000136275	0.0210629	-1.64029	(1S,2R,7R,10S,11S,14S,15S)-N-[2,5-bis(trifluoromethyl)phenyl]-2,15-dimethyl-5-oxo-6-azatetracyclo[8.7.0.0??,?.0????,???]heptadec-3-ene-14-carboxamide	15.1759	14.1459	15.1422	15.113	14.3892	15.4962	15.6754	13.2051	14.0894	13.1865	13.5914	14.1554	12.8341	12.5939
X60502	-0.85232	0.113309	-1.10594	-0.177085	-1.23535	-0.698847	-1.58411	0.15855	-0.187401	1.46614	0.819423	1.1605	1.0457	1.07743	575.268	22.526	C40H34N2O2	False	2.97044	0.00013665	0.0210629	2.97044	N,N'-[Ethene-1,2-diyldi(4,1-phenylene)]bis[N-(4-methoxyphenyl)aniline]	15.8969	17.7089	15.421	17.164	15.1782	16.1849	14.5237	17.7938	17.1447	20.2476	19.034	19.674	19.4586	19.5181
X23673	-1.38421	-0.196853	-1.16862	-0.277717	-1.0289	-0.878589	-0.594836	-0.0883709	0.628465	1.7017	1.36283	1.27611	0.784446	-0.13545	292.199	21.231	C12H21N9	False	3.31864	0.000137535	0.0210629	3.31864	N~2~,N~4~-Bis(azetidin-3-yl)-N~6~-(azetidin-3-yl)-1,3,5-triazine-2,4,6-triamine	11.133	13.627	11.5858	13.4572	11.8793	12.195	12.791	13.8549	15.3606	17.6149	16.9031	16.721	15.6882	13.756
X54287	-0.98375	0.411785	-1.21331	-2	-0.5111	-0.76748	-0.340373	1.0404	0.755379	1.17326	1.05639	0.498543	0.590013	0.414105	524.952	21.517	C9H14FN2O15P3	False	3.31701	0.000138693	0.0210629	3.31701	5-Fluorouridine triphosphate|C21749	9.13604	12.0668	8.65395	6.74169	10.1286	9.59023	10.4872	13.3869	12.7884	13.666	13.4205	12.249	12.4411	12.0717
X38252	-0.796341	-0.848441	-1.45435	-0.521886	-1.21952	-0.665083	-0.00821107	1.7428	0.67197	1.30739	1.12479	0.427714	-0.452266	0.691435	401.183	18.933	C21H28N4S2	False	4.20857	0.000138785	0.0210629	4.20857	2(1H)-Pyrimidinethione, 1,1'-(4-methyl-1,3-phenylene)bis(3,4-dihydro-4,4,6-trimethyl-	7.76157	7.62238	6.00373	8.49476	6.63106	8.11222	9.86703	14.5448	11.6841	13.3816	12.8938	11.0316	8.68075	11.7361
X13923	1.22494	0.642101	1.53431	0.0151704	0.98232	-0.00533969	1.35231	-0.857479	-0.89998	-1.347	-0.693985	-0.644532	-0.00576217	-1.29708	218.174	40.554	C11H23NO3	False	1.30148	0.000138842	0.0210629	-1.30148	Insect repellent M 3535	18.6477	18.1856	18.893	17.6886	18.4554	17.6724	18.7487	16.9968	16.9631	16.6087	17.1264	17.1656	17.672	16.6483
X55653	-0.553208	0.683581	-0.770562	-1.94403	-0.801832	-1.39197	-0.737208	0.887811	0.474905	0.648462	0.990384	0.573502	1.19762	0.74254	535.285	26.666	C23H40N6O7	False	4.01676	0.000139385	0.0210629	4.01676	L-Isoleucylglycyl-L-valyl-L-alanyl-L-prolylglycine	10.1131	13.2657	9.559	6.56776	9.47929	7.97501	9.64402	13.7863	12.7338	13.1762	14.0478	12.9851	14.576	13.416
X34437	-0.151119	-1.03415	-0.755567	-1.21246	-1.25921	-1.04727	-0.0993593	-0.196986	1.07554	1.51921	1.35377	1.14604	0.721942	-0.0603848	370.723	20.396	C19H34O4	False	2.42932	0.000139788	0.0210629	2.42932	w/o MS2:2,4-dihydroxyheptadec-16-ynyl acetate	16.1949	14.8443	15.2704	14.5716	14.5001	14.8243	16.2741	16.1248	18.0711	18.7497	18.4966	18.1789	17.5303	16.3337
X1504	-0.159571	-0.644825	-1.5692	-1.27835	0.227639	-1.06786	-1.2435	0.53334	0.851934	1.05117	0.348436	0.370066	1.39057	1.19016	84.0445	2.993	C4H5NO	False	1.3225	0.000139808	0.0210629	1.3225	Nitrile-4-Oxobutanoic acid	16.0864	15.6948	14.9488	15.1835	16.3989	15.3534	15.2116	16.6456	16.9027	17.0635	16.4964	16.5138	17.3374	17.1756
X47714	-0.249165	-0.745975	-0.545627	-1.17947	-1.40208	-0.737177	-0.702267	-0.00701909	1.31893	1.50552	1.46312	1.23676	0.101747	-0.0573129	472.263	19.788	C17H34N4O10	False	2.37278	0.000140335	0.0210629	2.37278	Ribostamycin|C01759	15.3826	14.6408	14.9399	13.9935	13.6611	14.6539	14.706	15.7442	17.724	18.0027	17.9394	17.6014	15.9066	15.6691
X3083	0.946133	0.97646	1.28834	0.899089	0.0468265	0.894499	0.91508	-0.34062	-1.16626	-0.829329	-1.55378	0.0896782	-1.31885	-0.847269	105.033	44.506	C7H6O2	False	0.977495	0.000140372	0.0210629	-0.977495	Benzoate|C00180	19.3758	19.3932	19.572	19.3488	18.8601	19.3462	19.358	18.6379	18.1645	18.3577	17.9423	18.8847	18.077	18.3474
X44472	1.26466	0.94746	0.745819	-0.442483	1.06465	1.39218	0.696062	-0.419392	-0.491903	-1.0941	-0.522421	-0.235757	-1.57991	-1.32486	448.231	36.861	C22H35NO7	False	1.52802	0.000141397	0.0211455	-1.52802	Sinomontanine E	15.8822	15.583	15.3927	14.2715	15.6935	16.0025	15.3458	14.2933	14.2249	13.6568	14.1961	14.4666	13.1984	13.439
X1520	-0.156078	-0.51737	-1.66084	-1.31403	0.228381	-1.06641	-1.21939	0.499825	0.78979	1.0957	0.501701	0.329973	1.33072	1.15803	84.0446	2.949	C4H5NO	False	1.39244	0.000142575	0.0212503	1.39244	Nitrile-4-Oxobutanoic acid	16.126	15.8174	14.8407	15.1369	16.4544	15.3484	15.2178	16.6862	16.9339	17.1952	16.6878	16.5411	17.3959	17.2484
X26948	-0.742654	-0.283933	-1.21482	-0.544765	-0.896386	-1.36618	-1.20838	0.954319	0.557093	1.59601	0.802344	0.43608	0.820653	1.09061	314.268	49.35	C18H35NO3	True	0.794764	0.000144367	0.0214457	0.794764	(+)-Prosopinine|C10167	17.2797	17.4837	17.0698	17.3677	17.2114	17.0025	17.0727	18.0342	17.8576	18.3194	17.9666	17.8038	17.9747	18.0947
X39387	0.0238866	1.23861	0.121789	0.625977	1.26606	1.09624	1.18002	0.394772	-1.15727	-0.265344	-1.29805	-0.830283	-1.03958	-1.35682	409.311	47.447	C28H40O2	False	2.40537	0.000145328	0.0215167	-2.40537	14-[(3E)-5,6-dimethylhept-3-en-2-yl]-2,15-dimethyltetracyclo[8.7.0.0??,?.0????,???]heptadeca-6,9-diene-5,8-dione	14.3297	16.1715	14.4782	15.2426	16.2131	15.9556	16.0827	14.8921	12.5389	13.8912	12.3254	13.0346	12.7173	12.2363
X68965	-0.806594	-0.900974	-0.127936	-1.55303	-0.404927	-0.0129565	-1.70513	0.33562	1.04159	0.580156	1.34208	0.895703	-0.0607383	1.37714	651.349	20.158	C36H52O9	False	3.53179	0.000147323	0.021698	3.53179	onchitriol I A	10.8349	10.6232	12.3569	9.16076	11.7357	12.6148	8.81962	13.3966	14.98	13.9451	15.6539	14.6528	12.5077	15.7325
X49399	-0.532339	-0.301314	-0.160854	-0.594098	-1.84686	-1.11433	-0.992968	0.544018	1.0713	1.28507	1.13117	1.45259	-0.217763	0.276377	485.276	19.337	C29H38N2O3	False	2.5264	0.000147526	0.021698	2.5264	2H-1,3-Diazepin-2-one, 1,3-bis(cyclobutylmethyl)hexahydro-5,6-dihydroxy-4,7-bis(phenylmethyl)-, (4R,5S,6S,7R)-	16.0059	16.3745	16.5985	15.9074	13.9088	15.0774	15.2711	17.723	18.5642	18.9052	18.6597	19.1725	16.5077	17.296
X60497	-0.277245	-1.21884	0.181965	-1.55767	-0.98865	-1.3942	-0.243495	0.163153	1.37895	0.562267	1.18547	0.780194	1.31386	0.114225	575.268	22.362	C25H44O13	False	4.27239	0.000149597	0.0219302	4.27239	3,4,5-trihydroxydrhydro-alpha-ionol-9-O-alpha-L-rhamnopyranosyl-(1->6)-beta-D-glucopyranoside	14.1484	11.5875	15.3973	10.666	12.2135	11.1106	14.2401	15.3461	18.6528	16.4316	18.1265	17.0243	18.4757	15.213
X63477	1.16392	1.19938	0.834888	-0.125987	1.00447	0.817214	0.593036	-0.902442	-1.60644	-1.84577	0.0485381	-0.128782	-0.739484	-0.312539	600.273	23.263	C34H37N3O7	False	5.84984	0.000150257	0.0219548	-5.84984	(2E)-N-{3-[(2E)-N-(4-{[(2E)-3-(3,4-dihydroxyphenyl)-1-hydroxyprop-2-en-1-ylidene]amino}butyl)-3-(4-hydroxyphenyl)prop-2-enamido]propyl}-3-(4-hydroxyphenyl)prop-2-enimidic acid	18.1911	18.3235	16.9634	13.3779	17.5962	16.8974	16.0609	10.4805	7.85356	6.96049	14.0291	13.3674	11.0886	12.6817
X61515	-1.86796	0.420911	-0.518921	-1.48992	-0.614282	-0.529412	-0.884947	1.18874	0.0878235	0.321894	1.23389	0.912454	0.796078	0.943641	584.263	20.096	C27H45O10S	False	6.33104	0.000150766	0.0219572	6.33104	(1R,3R,3aS,3bS,4R,5R,5aR,6R,7S,9aS,9bR,11aR)-3,3b,4,6,7-pentahydroxy-1-[(2R,3E,5R)-5-hydroxy-6-methylhept-3-en-2-yl]-9a,11a-dimethyl-hexadecahydro-1H-cyclopenta[a]phenanthren-5-yl sulfate	4.51753	13.765	9.96793	6.0449	9.58265	9.92554	8.4891	16.8672	12.4193	13.365	17.0497	15.751	15.2808	15.877
X17196	0.704691	1.92198	0.882972	0.721486	0.266487	1.07763	0.440673	-0.377282	-0.882165	-1.28787	-1.19427	-0.514109	-1.24327	-0.516954	244.226	45.754	C14H29NO2	True	0.917685	0.000154198	0.0223442	-0.917685	1,1'-(1-methyl-piperidine-2,6-diyl)-bis-butan-2-ol	17.4814	18.1313	17.5766	17.4904	17.2475	17.6805	17.3405	16.9037	16.6342	16.4176	16.4676	16.8307	16.4414	16.8292
X27050	0.112953	-0.759496	-1.40251	-0.788879	-0.907173	-1.03615	-0.787709	-0.375753	0.753662	1.82148	1.23315	1.10618	0.483272	0.546974	315.201	20.722	C12H28N4O4	False	2.02578	0.000154909	0.0223442	2.02578	1,7,11,17-Tetraoxa-2,6,12,16-tetraazacycloicosane	17.4473	16.3365	15.5179	16.2991	16.1485	15.9843	16.3006	16.8251	18.263	19.6226	18.8735	18.7119	17.9188	17.9999
X35486	0.222245	0.671003	0.763999	1.84196	0.512078	1.21946	0.384041	-0.551107	-0.399547	-0.665436	-2	-0.838628	-0.16565	-0.993762	379.194	20.524	C15H32O9	False	1.68735	0.000154928	0.0223442	-1.68735	Acetic acid--nonane-1,6,8-triol (3/1)	14.9378	15.4098	15.5076	16.6414	15.2427	15.9867	15.108	14.1244	14.2838	14.0041	12.5997	13.822	14.5298	13.6588
X46773	-0.583156	-0.590917	-1.02897	-0.567549	-1.38085	0.0805332	-1.51178	-0.539938	1.08882	1.30879	1.15154	0.879816	0.905038	0.788624	465.226	21.051	C23H33ClN4O4	False	1.87233	0.000157734	0.022565	1.87233	1,1-Cyclopentanediacetimide, N-(4-(4-(o-nitrophenyl)-1-piperazinyl)butyl)-, monohydrochloride	16.3629	16.3538	15.8396	16.3813	15.4266	17.142	15.2729	16.4137	18.3256	18.5838	18.3992	18.0802	18.1098	17.9732
X60803	-0.956882	-0.0388518	-0.0798967	-0.373154	-1.46401	-1.53593	-1.04243	-0.140683	0.927702	1.14286	1.32502	1.43474	0.515277	0.286247	578.257	19.915	C28H37N5O7	False	3.93163	0.000157929	0.022565	3.93163	(2S)-2-[(2S)-2-(2-{2-[(2S)-2-amino-3-(4-hydroxyphenyl)propanamido]acetamido}acetamido)-3-phenylpropanamido]-4-methylpentanoic acid	11.0107	13.3113	13.2084	12.4735	9.73983	9.55962	10.7963	13.0561	15.7334	16.2726	16.7291	17.004	14.6999	14.1259
X15640	0.215933	0.421724	1.34425	0.593208	0.912425	1.17906	0.871216	0.170066	0.128944	-0.976654	-0.896588	-0.69179	-1.61692	-1.65487	232.19	22.689	C12H25NO3	True	2.3638	0.000157978	0.022565	-2.3638	Octanamide, N,N-bis(2-hydroxyethyl)-	15.7615	16.0689	17.4471	16.3251	16.802	17.2003	16.7404	15.6929	15.6315	13.9798	14.0994	14.4054	13.0233	12.9666
X25770	-0.706993	-0.772456	-0.0755626	-0.167751	-0.5766	-1.81302	-1.39557	-0.329344	0.724713	0.431186	1.20408	1.11908	1.17118	1.18705	306.66	22.48	C36H45N5O8S	False	3.03516	0.000158701	0.0225959	3.03516	w/o MS2:MLS001076298-01!	10.9573	10.831	12.1751	11.9973	11.2088	8.82411	9.62924	11.6856	13.7186	13.1525	14.6431	14.4792	14.5797	14.6103
X37941	-0.902772	-0.721954	-1.04931	-1.02527	-1.0636	-0.267165	-0.579658	0.513546	0.523405	2	1.35074	1.18033	-0.287073	0.320721	398.206	21.109	C21H36BrNO	False	1.66779	0.000161196	0.022878	1.66779	Tridihexethyl bromide|C11761	14.8332	15.0213	14.6807	14.7057	14.6658	15.4946	15.1694	16.3069	16.3172	17.8621	17.1781	17.0008	15.4738	16.1063
X51518	-0.20924	-0.475804	-0.233353	-0.202123	-1.10931	-1.68853	-1.64348	-0.258265	0.786728	1.25257	0.945733	0.896362	1.06945	0.869256	502.768	18.65	C47H69N15O10	False	1.99017	0.000163002	0.0230609	1.99017	w/o MS2:[Gln1]-moroidin	15.984	15.6502	15.9538	15.993	14.8568	14.1314	14.1878	15.9226	17.2314	17.8148	17.4305	17.3687	17.5855	17.3347
X25738	1.44447	1.67926	-0.355	0.252018	1.41972	0.620634	0.420035	-0.773062	-1.42134	-0.767396	-1.18283	-0.61656	-0.562078	-0.157875	306.262	32.359	C17H35N2O	False	3.79818	0.000167363	0.0233209	-3.79818	Opratonium	17.9429	18.5123	13.5786	15.0508	17.8829	15.9448	15.4583	12.5646	10.9923	12.5784	11.5708	12.9442	13.0763	14.0567
X49394	-0.391581	-0.274037	-0.569604	0.0575757	-1.64008	-1.64754	-1.05748	0.123739	0.926296	1.53667	0.733335	1.31905	0.537993	0.345666	485.276	19.393	C25H34N8O	False	2.40744	0.00016761	0.0233209	2.40744	Acetamide, N-[2-[(1-butyl-4,5-dicyano-1H-imidazol-2-yl)azo]-5-(dibutylamino)phenyl]-	16.5568	16.7361	16.2852	17.2421	14.652	14.6406	15.5409	17.343	18.5675	19.4987	18.2731	19.1667	17.9751	17.6816
X14223	0.976757	0.676452	1.20934	-0.151367	1.32168	0.283214	1.35253	0.0256591	-0.793993	-1.265	-1.47408	-0.912493	-0.16062	-1.08808	221.116	45.725	C14H16N	False	1.39027	0.000168683	0.0233209	-1.39027	6-(4-Chlorophenoxy)-9-methylpurine	16.788	16.5303	16.9877	15.8197	17.0841	16.1927	17.1106	15.9716	15.268	14.8637	14.6842	15.1663	15.8117	15.0156
X42923	-1.13258	-1.53366	-0.82122	-0.837041	-0.577694	0.293161	-1.16359	0.492699	1.42938	1.40004	1.19993	0.347006	0.483734	0.419836	436.252	20.109	C24H34O4S	False	1.15787	0.000168881	0.0233209	1.15787	17beta-Hydroxy-4-mercaptoandrost-4-en-3-one 4-acetate 17-propionate|C15180	16.1729	15.8913	16.3915	16.3804	16.5624	17.1738	16.1511	17.3139	17.9715	17.9509	17.8104	17.2116	17.3076	17.2627
X36530	-0.828161	-0.536446	-0.834542	0.387887	-1.77861	-0.817698	-1.21128	0.0587968	1.27595	1.09253	0.236286	1.07331	1.13635	0.745629	387.228	20.812	C22H27NO4	False	1.57193	0.000168967	0.0233209	1.57193	Thalicsessine|C08714	17.784	18.0697	17.7778	18.9748	16.8534	17.7943	17.4089	18.6525	19.8443	19.6647	18.8263	19.6459	19.7076	19.325
X54355	-0.535674	-0.862185	-0.834084	0.314057	-1.67646	-1.59127	-0.418173	0.690104	0.845081	1.29383	0.425082	0.754198	1.41868	0.176808	525.329	36.215	C29H46N2O5	True	1.64282	0.000169224	0.0233209	1.64282	1-Benzyl hydrogen (2S-trans)-4-(tert-butoxy)-pyrrolidine-1,2-dicarboxylate, compound with dicyclohexylamine (1:1)	18.2301	17.8951	17.9239	19.102	17.0596	17.147	18.3507	19.4878	19.6469	20.1073	19.2159	19.5536	20.2354	18.9612
X22313	0.283268	1.54639	0.23659	0.602819	0.645351	1.95194	0.411416	-0.0557177	-1.22387	-0.830479	-1.35861	-0.713419	-0.904844	-0.590834	282.148	43.811	C13H20ClN5	True	1.36043	0.000169456	0.0233209	-1.36043	2H-Tetrazole-2-ethanamine, N,N-diethyl-5-phenyl-, monohydrochloride	16.4765	17.5357	16.4373	16.7444	16.7801	17.8758	16.5839	16.1922	15.2125	15.5424	15.0995	15.6406	15.4801	15.7434
X50770	0.948031	0.484349	0.42549	0.837866	1.45844	0.563144	0.745385	-0.911231	-1.83034	-0.301584	-1.86816	-0.0575043	-0.46726	-0.0266277	497.076	45.608	C21H20O12S	True	5.73986	0.00016972	0.0233209	-5.73986	{[6-(5,7-dihydroxy-4-oxo-2-phenyl-4H-chromen-6-yl)-3,4,5-trihydroxyoxan-2-yl]methoxy}sulfonic acid	16.9088	15.2036	14.9872	16.5037	18.7859	15.4934	16.1636	10.0713	6.69117	12.3133	6.55211	13.2109	11.704	13.3245
X63406	-0.802092	0.33303	-1.19651	-1.19904	-0.912261	-1.7477	0.0256787	0.783656	0.218676	0.277813	1.4101	1.15152	1.00544	0.651671	599.386	21.703	C41H52O2	False	2.87944	0.000169761	0.0233209	2.87944	Thorexanthin	9.4591	11.5395	8.73624	8.7316	9.25719	7.72605	10.9762	12.3654	11.3299	11.4383	13.5135	13.0396	12.7718	12.1235
X11628	0.692456	1.91003	0.995159	0.786842	0.283739	1.03129	0.165349	-0.450913	-1.07916	-1.34252	-1.22553	-0.348544	-1.09127	-0.326917	198.184	45.352	C12H23NO	False	1.03056	0.000170072	0.0233209	-1.03056	Azacyclotridecan-2-one	17.397	18.1459	17.5832	17.4551	17.1457	17.6054	17.0729	16.6939	16.3075	16.1455	16.2175	16.7568	16.3	16.7701
X34440	-0.234527	-1.45225	-0.531861	-1.56549	-0.953034	-0.554946	-0.262273	0.148856	1.3927	1.21987	1.40685	1.1593	0.209688	0.0171107	370.723	20.286	C19H34O4	False	1.96562	0.000170876	0.0233592	1.96562	w/o MS2:2,4-dihydroxyheptadec-16-ynyl acetate	16.9566	15.4483	16.5883	15.3081	16.0667	16.5597	16.9222	17.4315	18.9721	18.758	18.9896	18.683	17.5068	17.2683
X2925	0.451229	0.773247	0.619415	0.693478	1.01681	1.34295	1.08244	-0.222016	-0.989228	0.0412508	-1.26701	-0.853126	-0.929052	-1.76039	103.054	30.499	C8H8O	False	0.920134	0.000174403	0.0237684	-0.920134	Phenylacetaldehyde|C00601	16.2104	16.3839	16.301	16.3409	16.515	16.6907	16.5504	15.8478	15.4346	15.9896	15.285	15.5079	15.467	15.0193
X50393	-0.240446	-0.851096	-0.435709	-0.917484	-1.2075	-0.0953029	-1.76452	-0.210607	1.1198	1.1002	1.24685	1.18094	0.00363959	1.07123	494.263	19.764	C25H42ClNO5	False	2.43142	0.000175154	0.023798	2.43142	E,(7S)-N-[(2Z,4E)-2-(chloromethylene)-4-methoxy-5-(methoxycarbonyl)-4-pentenyl]-7-methoxy-N'-methyltetradec-4-enamide	16.117	15.1742	15.8155	15.0717	14.624	16.3411	13.764	16.163	18.217	18.1868	18.4132	18.3114	16.4938	18.1421
X36529	-0.899489	-0.541589	-0.589712	0.316549	-1.82682	-0.839527	-1.22923	0.00524973	1.31456	1.00141	0.29817	1.09628	1.14834	0.745816	387.228	20.771	C22H27NO4	False	1.55073	0.00017974	0.024184	1.55073	Thalicsessine|C08714	17.6734	18.0197	17.9731	18.8499	16.7762	17.7314	17.3544	18.5487	19.8155	19.5125	18.8321	19.6043	19.6547	19.2652
X24012	-2	-0.739342	-0.489447	-0.163653	-1.38762	-0.313908	-0.610599	1.45103	0.82132	0.763585	0.664536	0.890208	0.440707	0.771609	294.263	47.587	C14H33N5	True	1.08878	0.000180113	0.024184	1.08878	1-(3-Aminopropyl)-4-methyl-1,4,8,11-tetraazacyclotetradecane	18.0318	18.9243	19.0884	19.3024	18.4986	19.2037	19.0089	20.3627	19.9492	19.9113	19.8462	19.9944	19.6992	19.9165
X36762	0.546623	0.316961	1.01652	2	0.127385	0.0427878	1.31622	-0.360422	-0.703107	-0.926389	-1.16038	-0.525526	-0.670844	-1.21012	389.177	23.41	C21H26N4S	True	1.83772	0.000181539	0.024184	-1.83772	as-Triazine-3(2H)-thione, 5,6-diphenyl-, compd. with triethylamine	15.4447	15.1789	15.9886	17.3473	14.9594	14.8615	16.3355	14.3948	13.9981	13.7397	13.4688	14.2037	14.0355	13.4113
X57889	1.17168	0.678316	0.443649	0.377579	1.20832	1.29647	0.270847	-0.794072	-1.25877	-1.34741	-0.493763	-0.0729307	-1.79795	0.318036	554.225	23.797	C30H33N3O6	False	6.13727	0.000181972	0.024184	-6.13727	1,3,5-Tris(4-propoxyphenyl)-1,3,5-triazinane-2,4,6-trione	14.4593	12.5136	11.5882	11.3276	14.6038	14.9514	10.9067	6.70705	4.87446	4.52489	7.89137	9.55098	2.74813	11.0928
X40600	-0.65999	-0.905558	-0.352872	-1.13	-0.591284	0.0315803	-1.86901	0.0641799	0.841827	1.20286	1.26945	0.775397	-0.129182	1.4526	419.249	20.805	C18H34N4O7	False	3.09819	0.000182464	0.024184	3.09819	L-Seryl-L-threonyl-L-valyl-L-leucine	12.6379	12.1517	13.2459	11.7074	12.7739	14.0071	10.2443	14.0716	15.6112	16.326	16.4578	15.4797	13.6888	16.8204
X72368	-1.5019	-0.423084	-0.55138	0.503322	-0.761963	-1.18451	-1.55365	0.458966	0.265216	1.37939	0.200022	1.01367	1.21076	0.945131	689.373	25.749	C31H48N10O8	False	3.2518	0.000182573	0.024184	3.2518	AWSVAR	11.7952	14.0386	13.7718	15.965	13.3339	12.4552	11.6876	15.8728	15.4699	17.7868	15.3343	17.0263	17.4361	16.8837
X33255	-0.740791	-0.424724	-0.86735	-1.57988	-1.29516	-0.112677	-0.482121	0.799145	0.795755	1.30819	1.48418	1.3264	-0.362735	0.151757	361.183	20.199	C15H30O8	False	2.4312	0.000183033	0.024184	2.4312	Aleppotrioloside	16.5775	17.0663	16.3818	15.28	15.7203	17.5488	16.9775	18.9588	18.9536	19.746	20.0181	19.7742	17.1621	17.9577
X49066	0.63672	-0.178606	0.997069	1.05115	0.357185	1.4734	1.41949	-0.415147	-0.876379	0.00112396	-0.819297	-1.16349	-1.46705	-1.01617	483.245	30.617	C22H34N4O8	False	1.15181	0.000183285	0.024184	-1.15181	L-Tyrosine, L-seryl-L-threonyl-L-leucyl-	15.1915	14.6205	15.4439	15.4817	14.9957	15.7775	15.7397	14.4549	14.1319	14.7464	14.1718	13.9308	13.7182	14.034
X31579	-0.671987	-0.555078	-1.23099	-0.490859	-1.44633	-1.28566	0.189146	0.574263	0.643156	1.57161	1.23652	1.18892	0.643207	-0.365912	348.212	20.896	C16H25N7O2	False	2.64455	0.000183317	0.024184	2.64455	5-Azidopentyl 4-(6-azidohexyl)-1H-pyrrole-2-carboxylate	18.0629	18.26	17.1208	18.3682	16.7578	17.0286	19.5143	20.1634	20.2795	21.8443	21.2796	21.1993	20.2796	18.5788
X10938	0.298286	1.64991	0.530534	1.08081	0.502684	1.36192	0.277493	-0.350986	-0.671063	-1.70081	-1.50472	-0.351116	-0.74914	-0.373799	192.13	43.083	C9H16O4	False	1.25523	0.000183422	0.024184	-1.25523	Methyl 2,2-dimethyl-5-(~2~H_3_)methyl-1,3-dioxane-5-carboxylate	16.7147	17.7561	16.8936	17.3176	16.8722	17.5342	16.6986	16.2144	15.9677	15.1743	15.3254	16.2143	15.9076	16.1968
X45150	-0.740939	-1.05997	-0.733625	-1.4635	-0.602524	-1.23073	0.334633	0.874154	1.23091	0.705211	1.61869	0.915665	0.529321	-0.377306	453.214	20.249	C25H32N4S2	False	2.45119	0.000187303	0.0245844	2.45119	4,6-Bis(4'-((2''-(dimethylamino)ethyl)thio)phenyl)-5-methylpyrimidine	11.1504	10.6525	11.1619	10.0227	11.3665	10.386	12.8292	13.6713	14.2281	13.4076	14.8334	13.7361	13.1331	11.718
X70344	1.69175	1.47933	-0.0353984	-0.0392862	1.56589	0.0332667	0.76598	-0.974884	-1.29284	-0.302251	-0.570088	-0.620532	-0.714333	-0.986605	666.395	45.679	C32H60NO11P	False	3.54326	0.000187574	0.0245844	-3.54326	1-Palmitoyl-2-(5-hydroxy-8-oxo-6-octenedioyl)-sn-glycero-3-phosphocholine|C13898	17.7115	17.2292	13.7897	13.7809	17.4257	13.9456	15.6094	11.6564	10.9344	13.1838	12.5756	12.461	12.248	11.6298
X45803	0.0379194	-1.58506	0.0404847	-0.985801	-1.0116	-1.18314	-0.911267	-0.276328	1.28232	0.844843	1.23259	1.04912	0.988176	0.477741	458.247	20.209	C31H33NO	False	1.55534	0.000188113	0.0245844	1.55534	2-{3-[(3,3-Diphenylpropyl)amino]-1-phenylpropyl}-5-methylphenol	17.2346	15.6565	17.2371	16.2392	16.2141	16.0473	16.3117	16.9291	18.4446	18.0193	18.3963	18.2179	18.1586	17.6623
X17439	-0.11105	-0.268859	-1.36371	-0.639312	-1.66083	-0.58682	-1.11481	0.779943	0.22575	1.00764	0.0827057	1.33664	0.874388	1.43833	246.169	22.456	C11H21N5	True	1.14911	0.000192964	0.0251445	1.14911	s-Triazine, 4,6-bis(isopropylamino)-2-ethyl-	19.078	18.9676	18.2012	18.7083	17.9932	18.745	18.3754	19.7018	19.3138	19.8612	19.2137	20.0915	19.7679	20.1626
X34434	-0.189254	-1.06255	-0.785433	-1.25269	-1.33652	-0.74175	-0.127814	-0.128149	1.15385	1.50543	1.40124	1.27288	0.312965	-0.0221896	370.722	20.348	C19H34O4	False	2.33262	0.000194077	0.0251638	2.33262	w/o MS2:2,4-dihydroxyheptadec-16-ynyl acetate	16.1372	14.84	15.2516	14.5575	14.433	15.3165	16.2285	16.228	18.1324	18.6546	18.4999	18.3092	16.8833	16.3854
X21752	0.425651	1.56494	0.308051	1.09939	0.808777	1.23647	0.190694	-0.179722	-0.924453	-0.640138	-1.8591	-0.816758	-1.19435	-0.0194566	278.195	45.906	C17H27NS	True	1.39662	0.000194241	0.0251638	-1.39662	Piperidine, 3-methyl-1-[2-methyl-1-(2-thienyl)cyclohexyl]-	17.0271	18.0155	16.925	17.6116	17.3595	17.7306	16.8232	16.5018	15.8557	16.1024	15.0448	15.9491	15.6215	16.6409
X75269	1.74205	0.233809	0.589059	-0.111338	1.07817	0.650441	1.25137	-1.49809	-0.136585	-1.3946	-0.345722	-0.0431761	-0.866938	-1.14845	728.563	25.029	C41H77NO9	False	5.36987	0.00019694	0.0254396	-5.36987	2-hydroxy-N-[(4E,8E)-3-hydroxy-9-methyl-1-{[3,4,5-trihydroxy-6-(hydroxymethyl)oxan-2-yl]oxy}octadeca-4,8-dien-2-yl]hexadecanamide	16.7256	11.5086	12.7374	10.3147	14.4292	12.9497	15.0283	5.518	10.2274	5.87596	9.50401	10.5505	7.70114	6.72741
X28438	0.0229572	-0.664212	-0.841197	0.0459632	-0.894411	-1.84601	-1.31387	-0.179275	0.41509	1.39243	0.818797	1.10501	0.984628	0.954094	325.186	21.634	C14H28O8	False	2.27633	0.000202229	0.0258972	2.27633	Aleppotrioloside	15.7483	14.7512	14.4944	15.7817	14.4172	13.0364	13.8085	15.4549	16.3173	17.7354	16.9031	17.3184	17.1437	17.0994
X47135	-0.73505	-1.15729	-1.26051	0.093343	-1.35964	-0.710152	-0.308592	1.77581	0.558183	1.43179	0.643059	0.293886	-0.260668	0.995835	468.201	23.518	C26H29NO7	False	4.04914	0.00020259	0.0258972	4.04914	[(2S,4R)-4-[(tert-Butoxycarbonyl)oxy]-1-{[(9H-fluoren-9-yl)methoxy]carbonyl}pyrrolidin-2-yl]acetic acid	7.95101	6.85057	6.58157	10.1099	6.32323	8.0159	9.06242	14.4947	11.3214	13.5981	11.5426	10.6326	9.18732	12.462
X16967	0.571581	0.751674	0.0564568	0.229825	1.60735	0.88813	1.36087	-0.892481	-1.07736	-1.36861	-0.0225737	0.0224614	-0.45791	-1.66941	243.086	25.709	C12H14NO3	True	2.74958	0.000202747	0.0258972	-2.74958	Cotarnine	13.6038	13.9209	12.6968	13.0021	15.4274	14.1611	14.9934	11.0261	10.7006	10.1878	12.5577	12.637	11.7912	9.65818
X75397	-1.05414	0.174251	-0.224411	-2	-0.390873	-1.00986	-0.608608	0.948162	1.05919	0.979101	0.245397	0.594767	0.813225	0.825229	731.391	20.842	C42H54N2O9	False	2.76945	0.000202808	0.0258972	2.76945	Hyperforin 3,5-dinitrobenzoate	10.2585	12.4372	11.7301	7.95753	11.4349	10.337	11.0487	13.8098	14.0067	13.8647	12.5634	13.183	13.5705	13.5918
X63484	0.280186	-0.819818	-2	-0.730706	-1.20285	-0.771939	-0.156889	0.201455	0.643445	1.35833	1.19376	0.820111	1.05769	0.154121	600.296	22.459	C36H41NO7	False	4.69692	0.000205328	0.0261182	4.69692	16alpha-hydroxy-ent-17-kauranyl aristolochate II	13.9594	10.6285	6.97331	10.8983	9.46859	10.7734	12.6359	13.7209	15.0593	17.2241	16.7257	15.5943	16.3137	13.5776
X38027	-0.770553	0.389435	-0.490692	-0.549809	-1.86438	-1.05358	-1.16009	0.591942	0.350281	1.1077	0.71939	1.53629	1.09154	0.102539	399.182	19.253	C27H24N2	False	2.09718	0.0002069	0.0261182	2.09718	1-[2-(Anthracen-9-yl)ethyl]-1'-methyl-4,4'-bipyridin-1-ium	16.1685	17.7167	16.542	16.4631	14.7086	15.7907	15.6486	17.9869	17.6644	18.6753	18.157	19.2473	18.6537	17.3338
X62647	-0.545893	-0.292039	-0.0540201	-0.268099	-0.792532	-1.93562	-1.57002	-0.122867	0.554564	0.617237	1.22052	1.3176	0.830247	1.04092	593.268	19.114	C40H34N4	False	2.82785	0.000207294	0.0261182	2.82785	N,N'-bis(benzo[c]acridin-7-yl)hexane-1,6-diamine	11.2322	11.6925	12.1241	11.7359	10.7849	8.71216	9.3751	11.9992	13.2276	13.3413	14.4352	14.6113	13.7275	14.1096
X38029	-0.286018	0.15475	-0.136593	-0.870754	-1.66912	-0.790475	-1.88231	0.297766	0.454398	0.868586	0.92622	1.47975	0.657759	0.79605	399.183	19.201	C19H28N4O2S	False	2.33957	0.000207961	0.0261182	2.33957	N~1~-[2-(Dimethylamino)ethyl]-N~1~-[4-(tricyclo[3.3.1.1~3,7~]decan-1-yl)-1,3-thiazol-2-yl]ethanediamide	16.6194	17.278	16.8427	15.7458	14.5529	15.8657	14.2344	17.4917	17.7257	18.3445	18.4306	19.2577	18.0295	18.2362
X69970	0.00231795	0.0710294	-2	-0.287948	-1.13174	-0.996681	-0.803689	0.520459	0.343611	0.947528	0.826822	0.677399	1.25722	0.862404	662.322	23.59	C40H43N3O6	False	3.77916	0.00020836	0.0261182	3.77916	Norbinaltorphimine|C18130	11.9739	12.1411	6.39862	11.2675	9.21415	9.54281	10.0125	13.2347	12.8044	14.274	13.9803	13.6167	15.0276	14.0669
X73192	-1.46144	-1.65987	-0.167051	-0.207995	-0.798343	0.312122	-1.48364	1.05524	0.928993	0.584194	0.523104	0.570639	0.374057	1.42999	699.339	22.724	C39H46N4O8	False	2.59158	0.000208719	0.0261182	2.59158	5-{3-[(6-Aminohexyl)amino]-3-oxoprop-1-en-1-yl}-1-{5-O-[bis(4-methoxyphenyl)(phenyl)methyl]-2-deoxypentofuranosyl}pyrimidine-2,4(1H,3H)-dione	15.8813	15.552	18.0292	17.9613	16.9816	18.8243	15.8445	20.0574	19.8479	19.2758	19.1744	19.2533	18.9271	20.6793
X7598	0.242939	0.232503	1.66624	0.38841	0.251472	1.52887	1.17908	0.139614	-0.54836	-0.79776	-0.871152	-0.85405	-1.75465	-0.803156	159.027	12.908	C5H4N4O	True	2.1944	0.000208963	0.0261182	-2.1944	1H,2H,4H-pyrazolo[3,4-d]pyrimidin-4-one	14.3184	14.3038	16.3097	14.5219	14.3303	16.1175	15.6281	14.1738	13.2113	12.8623	12.7597	12.7836	11.5235	12.8548
X42878	-0.463301	-0.199018	-0.612777	-0.487827	-0.355719	-1.89665	-1.53463	0.0743137	-0.00982058	1.2351	1.11204	1.00703	1.0799	1.05136	435.76	21.349	C9H6Br3NOS	False	1.67674	0.000209227	0.0261182	1.67674	3-methylsulfinyl-2,4,6-tribromoindole	13.9145	14.194	13.7565	13.8886	14.0283	12.3989	12.7817	14.483	14.394	15.7104	15.5803	15.4693	15.5463	15.5162
X40349	-0.183185	-0.220188	0.0747364	-0.789182	-1.15811	-1.74878	-1.50065	-0.172591	1.06911	1.05197	1.1281	0.977997	0.580355	0.890418	417.22	19.781	C23H32N2O3S	False	1.82201	0.000211096	0.0261356	1.82201	Zanoterone	15.6858	15.6431	15.9834	14.9864	14.5606	13.8788	14.1652	15.698	17.1311	17.1113	17.1992	17.0259	16.567	16.9248
X65755	0.0160249	-1.65779	-0.289068	-1.13012	-0.891769	-0.640485	-0.87726	-0.381742	1.19482	0.908735	1.59019	1.19423	0.262111	0.702137	620.803	20.248	C12H13I3N2O2	False	2.44687	0.000211584	0.0261356	2.44687	Iopodic acid|C18093	14.6766	12.0562	14.1989	12.8823	13.2554	13.6488	13.2781	14.0539	16.522	16.0741	17.1409	16.5211	15.0618	15.7507
X56702	-0.38232	-0.201436	-0.794597	-0.774107	-0.415641	-1.02885	-1.87174	-0.376808	0.0816026	1.17719	1.31864	0.998585	1.16837	1.10111	543.809	20.563	C52H75N15O11	False	2.47712	0.000211742	0.0261356	2.47712	w/o MS2:[Val9]-moroidin	13.4369	13.7237	12.7833	12.8158	13.3841	12.4119	11.0756	13.4457	14.1724	15.9093	16.1336	15.6262	15.8953	15.7887
X53983	-0.576345	-1.05837	0.0347218	-1.12652	-1.06421	-0.87518	-0.776673	-0.379868	1.61923	1.12289	1.34517	1.27133	0.560044	-0.0962223	522.805	21.461	C12H17Br3Cl2O2	False	3.14903	0.000213233	0.0261356	3.14903	(2R,3R,5E,7S)-2,8,8-tribromo-1,7-dichloro-2,6-dimethyloct-5-en-3-yl acetate	11.4761	10.5	12.7136	10.362	10.4882	10.8709	11.0704	11.874	15.9223	14.9172	15.3673	15.2178	13.7774	12.4484
X39493	-0.759677	-0.850944	-1.1453	-0.34757	0.495826	-1.72061	-1.15463	0.802098	0.907082	0.795478	0.432754	-0.0136776	1.56739	0.991778	410.288	36.765	C21H41NO5	False	2.22296	0.000213244	0.0261356	2.22296	3-[(2-hydroxytetradecanoyl)oxy]-4-(trimethylazaniumyl)butanoate	14.3479	14.2184	13.8007	14.9327	16.1295	12.9843	13.7874	16.5641	16.713	16.5547	16.04	15.4065	17.65	16.8332
X26280	-0.9341	-0.413692	-0.865183	-0.325283	-1.65994	-0.185211	-1.31264	0.193676	1.60522	1.31477	0.347465	0.921219	1.11187	0.201831	310.181	20.948	C15H29NO2S	False	1.19196	0.000213435	0.0261356	1.19196	CHEMBL222029	16.8498	17.2309	16.9002	17.2957	16.3181	17.3983	16.5725	17.6758	18.7096	18.4969	17.7884	18.2086	18.3483	17.6817
X49258	-0.325961	-0.553754	-0.314671	-0.903136	-0.871384	-1.12675	-1.34615	-0.533364	1.3913	1.17822	1.40478	1.15808	0.947401	-0.104604	484.268	20.452	C27H35N5O2	False	3.16997	0.000213472	0.0261356	3.16997	1H-Pyrrolo(3,4-c)pyridine-1,3(2H)-dione, 6-methyl-2-(4-(4-phenyl-1-piperazinyl)butyl)-4-(1-piperidinyl)-	15.065	14.6005	15.088	13.8882	13.953	13.4323	12.985	14.6421	18.5662	18.1317	18.5937	18.0907	17.6611	15.5163
X44924	1.3495	1.07623	1.09043	0.473969	-0.0869681	1.31943	0.194693	-1.5028	-0.622776	-0.842931	-1.11771	-0.56548	-1.27769	0.512087	451.275	21.324	C26H40N2OS	False	5.01419	0.000214672	0.0261762	-5.01419	5-[4-(Octyloxy)phenyl]-2-(octylsulfanyl)pyrimidine	17.2548	16.3695	16.4155	14.4184	12.6012	17.1574	13.5137	8.01458	10.8655	10.1523	9.2621	11.0511	8.74383	14.5419
X79822	0.232059	-0.721896	-2	-0.674654	-1.44935	-0.312003	-0.224094	0.55103	0.663287	1.07249	0.850156	0.992238	0.770511	0.538629	822.91	22.999	C21H40Br4O12	False	3.22735	0.000215548	0.0261762	3.22735	2-Bromo-2-methylpropanoic acid--2,2-bis(hydroxymethyl)propane-1,3-diol (4/1)	11.1528	9.17142	5.91771	9.26954	7.66045	10.0228	10.2054	11.8154	12.0485	12.8984	12.4367	12.7318	12.2712	11.7896
X26886	0.462989	1.45881	0.443853	1.06204	0.98533	0.489638	0.5545	-0.101899	-0.905282	-1.09621	-2	-0.604482	-0.160898	-0.283806	314.158	43.621	C14H21N5O2	False	2.5792	0.00021813	0.0261762	-2.5792	Adenosine, 2',3'-dideoxy-N,N-diethyl-	15.3103	16.9575	15.2786	16.3012	16.1743	15.3544	15.4616	14.3758	13.0469	12.7311	10.7322	13.5445	14.2782	14.0749
X74473	-0.729838	-0.0270165	-0.726669	-1.25016	-0.150345	-0.971652	-1.69883	0.0389956	0.0983314	1.2889	0.837294	0.497457	1.39247	1.40106	717.376	22.577	C42H45N5O5	False	1.60051	0.000218434	0.0261762	1.60051	Adouetine Z|C09995	13.9319	14.6407	13.9351	13.4071	14.5163	13.688	12.9546	14.7073	14.7671	15.9678	15.5123	15.1696	16.0723	16.0809
X39871	0.117794	1.84384	0.914191	1.01907	0.597739	0.974363	0.153304	0.232449	-1.03639	-1.15068	-1.50422	-0.76116	-0.931775	-0.468528	413.286	44.215	C25H42OS	False	1.3537	0.000218678	0.0261762	-1.3537	4-(Octadecylsulfanyl)benzaldehyde	15.9492	17.4042	16.6205	16.7089	16.3538	16.6713	15.9791	16.0458	14.9762	14.8798	14.5818	15.2082	15.0644	15.4549
X39926	0.0031818	-0.870461	-1.78563	-0.847723	-0.0297042	-1.69228	-0.245904	0.2262	0.855335	1.18149	1.11427	0.516011	1.27895	0.296257	414.205	21.409	C21H32ClNO5	False	2.35246	0.000218836	0.0261762	2.35246	(2E)-N-[(2R,3S,4aS,8R,8aR)-8-chloro-2,4a-dihydroxy-5-oxo-3,4,4a,5,8,8a-hexahydro-2H-1-benzopyran-3-yl]dodec-2-enimidic acid	15.508	14.1926	12.8147	14.2269	15.4585	12.9553	15.133	15.8438	16.7911	17.2821	17.1809	16.2802	17.4289	15.9493
X9486	0.496713	1.01249	0.267328	0.961288	0.999418	0.583932	1.39764	0.181691	-0.504448	-0.249841	-1.07378	-1.48722	-1.73021	-0.854993	179.052	33.343	C10H10OS	False	1.141	0.000218944	0.0261762	-1.141	2,3-Dihydro-6-methyl-4H-1-benzothiopyran-4-one	15.8145	16.1747	15.6544	16.139	16.1656	15.8754	16.4437	15.5946	15.1154	15.2932	14.7178	14.4291	14.2594	14.8706
X64135	-0.697859	-0.500891	-0.66598	-0.89596	-1.42593	-1.45785	0.155374	0.682317	0.448717	1.28865	1.13691	1.74127	0.380835	-0.189594	606.276	19.125	C21H41N7O12	False	2.06506	0.00021981	0.0261762	2.06506	Dihydrostreptomycin|C01023	15.3258	15.5852	15.3678	15.0649	14.3671	14.3251	16.4493	17.1431	16.8355	17.9415	17.7417	18.5375	16.7462	15.995
X51934	-0.0330396	-0.242598	-2	-0.249065	-1.20882	-0.268493	-1.11852	0.67851	0.699942	1.25424	0.801526	0.444426	0.451546	1.09734	506.23	19.44	C31H33NO4	False	3.49417	0.000220888	0.0261762	3.49417	2-ethylhexyl 2-{4-[(2-oxo-1,2-dihydro-3H-indol-3-ylidene)(phenyl)methoxy]phenyl}acetate	12.8471	12.3749	7.7233	12.3603	10.1977	12.3165	10.4012	14.4504	14.4987	15.7476	14.7276	13.9229	13.939	15.3941
X43549	-0.929081	-0.265664	-0.367136	-1.06888	-0.758524	-1.95412	-0.197819	0.697706	0.855521	1.28292	1.50298	1.06731	0.27245	-0.137666	440.752	18.765	C12Cl8O	False	1.65418	0.000221208	0.0261762	1.65418	1,2,3,4,6,7,8,9-Octachlorodibenzofuran|C18113	13.6082	14.3014	14.1954	13.4622	13.7864	12.5372	14.3723	15.3079	15.4728	15.9194	16.1493	15.6941	14.8636	14.4351
X53286	0.737917	-0.0994168	1.71434	0.671861	-0.15432	1.25181	1.40227	-1.0814	-0.438661	-1.35699	-0.670707	-0.0667753	-0.864024	-1.04591	517.232	22.42	C28H34N2O6	False	1.75362	0.000221333	0.0261762	-1.75362	Cezomycin	16.5854	15.6551	17.6702	16.512	15.5941	17.1563	17.3235	14.5642	15.2782	14.258	15.0204	15.6914	14.8057	14.6036
X74075	-0.50128	-1.29252	-0.799069	-1.05749	-1.47931	-0.115441	-0.242182	-0.497883	0.871288	1.42608	1.36293	1.25733	0.611017	0.45653	711.369	21.443	C38H56O11	False	2.06706	0.000221407	0.0261762	2.06706	reveromycin G	16.5918	15.5486	16.1992	15.8584	15.3023	17.1005	16.9334	16.5962	18.4014	19.1329	19.0496	18.9104	18.0583	17.8546
X80730	-0.371125	0.136555	-1.9693	-0.172289	-0.89892	-0.469035	-1.67363	0.738106	0.296238	1.13438	0.352264	0.784837	0.726415	1.3855	851.389	22.194	C34H54N14O10S	True	4.14821	0.000221439	0.0261762	4.14821	HNNHMAK	9.36814	10.7287	5.08528	9.90099	7.95373	9.10576	5.87762	12.3407	11.1566	13.4027	11.3067	12.466	12.3094	14.0756
X31575	-0.515949	-0.876934	-1.02607	-1.29028	-1.13698	-0.808348	0.212741	0.549481	1.04987	1.61905	1.43769	1.03056	0.066396	-0.311221	348.212	20.798	C16H25N7O2	False	2.81778	0.000223895	0.0263427	2.81778	5-Azidopentyl 4-(6-azidohexyl)-1H-pyrrole-2-carboxylate	18.0951	17.4409	17.1706	16.6918	16.9696	17.5652	19.4157	20.026	20.9328	21.9644	21.6357	20.8978	19.1505	18.4661
X49497	0.195181	-0.609938	-1.56088	0.220272	-1.07205	-1.12909	-1.44679	-0.0141659	0.367942	1.17629	0.614135	0.813686	1.08278	1.36263	486.338	21.225	C28H49NO2S	False	6.06384	0.00022403	0.0263427	6.06384	4-Benzyl-3-heptadecyl-1lambda~6~,4-thiazinane-1,1-dione	12.3195	9.15707	5.42189	12.418	7.34196	7.11789	5.87001	11.4972	12.998	16.1731	13.9651	14.7489	15.8058	16.9051
X48724	-0.3546	-1.35381	0.285878	-0.816708	-1.23887	-1.19201	-0.85437	-0.238605	1.11819	0.0895808	1.25612	1.30302	1.10698	0.889198	480.25	21.552	C27H33N3O5	False	1.7162	0.000227069	0.0266299	1.7162	Fumitremorgin B|C20630	15.7695	14.6831	16.4659	15.2671	14.8081	14.859	15.2261	15.8956	17.3709	16.2525	17.5208	17.5718	17.3587	17.1219
X44865	-0.508271	-0.397259	0.305988	-0.762668	-1.11067	-0.829792	-2	0.162357	0.922658	0.571318	1.08407	1.19973	0.604266	0.965279	451.203	19.356	C18H34N4O5S2	False	1.786	0.00023121	0.027008	1.786	6,9,17,20,25-Pentaoxa-1,3,12,14-tetraazabicyclo[12.8.5]heptacosane-2,13-dithione	15.2281	15.354	16.1519	14.9395	14.5446	14.8633	13.3008	15.989	16.8516	16.4529	17.0347	17.1659	16.4903	16.8999
X16964	0.640917	0.54316	0.202931	0.361271	1.52451	0.82986	1.32826	-0.944809	-0.559448	-1.85533	-0.0556488	-0.0926675	-0.31464	-1.60836	243.086	25.658	C11H14O6	False	2.90389	0.000232227	0.027008	-2.90389	2-{3-hydroxy-1H,3H,4H,5H,6H-cyclopenta[c]furan-4-yl}-3-methoxy-3-oxopropanoic acid	13.9056	13.7226	13.0859	13.3822	15.5592	14.2592	15.1919	10.938	11.6592	9.23399	12.602	12.5327	12.1173	9.69619
X9644	-1.80349	-1.94972	0.0647178	-0.0995879	-0.523542	-0.666326	-0.474219	1.11537	0.711254	0.298823	0.776015	0.663735	1.3476	0.53937	180.174	36.945	C12H21N	True	2.39439	0.000232937	0.027008	2.39439	N-Cyclooctyl-2,3-Dihydro-1H-pyrrole	15.9084	15.6836	18.7799	18.5274	17.8757	17.6563	17.9515	20.3949	19.7737	19.1398	19.8732	19.7007	20.7518	19.5095
X79979	-0.929556	-0.330212	-0.0186792	-0.294298	-0.957954	-0.694966	-2	0.273658	0.397987	1.36278	0.733318	1.36157	0.312827	1.00722	827.46	19.939	C44H68O13	True	2.4419	0.000233098	0.027008	2.4419	Okadaic acid|C01945	13.6024	14.5424	15.031	14.5987	13.5578	13.9703	11.5727	15.4894	15.6844	17.1976	16.2104	17.1957	15.5509	16.6399
X46714	0.00538758	-0.600968	-0.0369687	-1.05153	-0.72776	-1.48591	-1.50816	-0.490281	0.880323	0.590493	1.49795	1.04045	0.787201	1.09978	464.912	20.158	C15H14Br2O7	False	4.19627	0.000233324	0.027008	4.19627	(4aS,10aR)-(+/-)-6,7-dibromo-4a-hydroxy-3,8-dihydroxymethyl-10a-methoxy-1,4,4a,10a-tetrahydrodibenzo[b,e][1,4]dioxin-1-one	12.4576	10.8103	12.3426	9.58617	10.4658	8.40605	8.3456	11.111	14.8347	14.0473	16.5127	15.2697	14.5817	15.4309
X57800	0.10003	-0.414515	-0.108522	-1.38749	-1.26346	-1.50352	-0.883802	-0.0730928	0.988897	1.09326	1.50103	1.23616	0.475746	0.239273	553.282	19.635	C34H32N8	False	2.23579	0.000234026	0.0270191	2.23579	2-N,4-N,6-N,8-N-tetrakis(3-methylphenyl)pyrimido[5,4-d]pyrimidine-2,4,6,8-tetramine	15.4537	14.7164	15.1549	13.3223	13.5	13.156	14.044	15.2056	16.7273	16.8769	17.4612	17.0816	15.9921	15.6532
X37670	0.519818	1.10751	0.75909	1.03255	0.543699	-0.14493	1.64458	-0.590828	0.0760119	-0.161405	-1.19762	-1.4416	-0.50701	-1.63986	396.167	28.428	C20H21N5O4	False	2.19809	0.000235825	0.0271565	-2.19809	Propanenitrile, 3-[[4-[(4-nitrophenyl)azo]phenyl][2-(1-oxopropoxy)ethyl]amino]-	12.77	13.5977	13.107	13.4921	12.8036	11.8337	14.3541	11.2057	12.1449	11.8105	10.3511	10.0074	11.3237	9.72819
X13651	-0.985365	-1.69816	0.0859903	-0.60939	-0.753299	-1.51066	-0.435925	0.207965	0.947231	0.505924	1.10115	1.00152	1.16807	0.974954	216.099	44.33	C6H16ClN5	False	0.911241	0.000236565	0.0271715	0.911241	Biguanide, 1-isobutyl-, monohydrochloride	14.5105	14.1257	15.089	14.7136	14.6358	14.2269	14.8072	15.1549	15.554	15.3158	15.6371	15.5834	15.6733	15.569
X32729	-0.701033	-1.0376	-0.245054	-0.0782418	-1.80393	-0.757729	-0.901065	-0.462849	1.26199	0.758832	0.455656	1.04993	1.27734	1.18375	357.217	21.777	C21H25NO3	False	1.65023	0.000238324	0.0272107	1.65023	Nalmefene|C08027	17.0524	16.7005	17.5291	17.7035	15.8994	16.9931	16.8433	17.3014	19.1046	18.5786	18.2617	18.8829	19.1207	19.0228
X20982	0.727397	1.68374	0.421377	0.375963	0.865293	0.331606	1.30485	-0.258714	-0.671402	-0.804682	-1.12493	-1.94687	-0.200396	-0.703231	273.09	41.416	C14H13ClN4	False	1.11859	0.000239331	0.0272107	-1.11859	Phthalazine, 1-hydrazino-4-phenyl-, hydrochloride	16.5698	17.2255	16.36	16.3289	16.6644	16.2985	16.9657	15.8937	15.6108	15.5194	15.2998	14.7363	15.9337	15.5889
X8156	0.338812	1.15356	0.0815714	0.984054	1.6726	0.841261	0.317072	-0.504001	-1.03911	0.0689603	-0.944454	-1.11962	-1.86796	0.0172515	165.054	47.377	C4H9ClN4O	True	5.98248	0.000239769	0.0272107	-5.98248	4-Amino-6-methyl-4,5-dihydro-1,2,4-triazin-3(2H)-one--hydrogen chloride (1/1)	12.0172	15.1829	11.0177	14.5243	17.1996	13.9694	11.9327	8.74243	6.66325	10.9687	7.03105	6.35046	3.44278	10.7678
X22750	-0.206971	-0.470944	0.235576	-1.35272	-0.729004	-0.778627	-2	0.588404	0.910252	0.756346	0.673442	0.888942	0.418876	1.28114	285.191	20.79	C13H24N4O3	False	1.68074	0.000240201	0.0272107	1.68074	(2S)-N-(carbamoylmethyl)-4-methyl-2-[(2S)-pyrrolidin-2-ylformamido]pentanamide	16.4674	16.186	16.9393	15.2458	15.9108	15.8579	14.3268	17.3154	17.6586	17.4945	17.4061	17.6359	17.1347	18.054
X32422	0.64234	1.42424	0.523266	0.796211	0.77149	-0.0958482	1.35822	0.0382481	-0.659699	-1.01234	-1.82184	-0.776373	0.152085	-1.33999	355.062	42.088	C18H12N4OS	True	3.00279	0.000240815	0.0272107	-3.00279	1,3,4-Oxadiazole-2(3H)-thione, 5-(4,6-diphenyl-2-pyrimidinyl)-	15.5631	17.0792	15.3322	15.8614	15.8135	14.1317	16.9512	14.3917	13.0383	12.3545	10.7848	12.812	14.6124	11.7191
X69702	-0.653819	0.0910197	-1.02712	-0.825056	-0.352235	-0.978448	-1.69742	0.0705157	-0.277609	0.702325	1.1019	1.10874	1.59321	1.14401	659.314	21.703	C45H40N4	False	2.41885	0.000241103	0.0272107	2.41885	2,6-Bis[(triphenylmethyl)amino]heptanedinitrile	12.4441	13.6026	11.8635	12.1778	12.9132	11.9392	10.821	13.5708	13.0293	14.5534	15.1749	15.1856	15.9391	15.2404
X38132	-0.191625	-0.574057	-0.508014	-1.58345	-0.914345	-0.768781	-0.937753	0.0288543	1.16904	0.936561	1.78244	0.979155	-0.420383	1.00236	400.19	20.005	C18H26N2O5S	False	1.96452	0.000241181	0.0272107	1.96452	Furathiocarb|C18650	14.7192	14.2392	14.3221	12.9722	13.8121	13.9948	13.7827	14.9959	16.427	16.1352	17.197	16.1887	14.4321	16.2178
X13405	0.333014	1.78368	0.423288	1.21538	0.627032	0.284485	0.825243	-0.21861	-1.11331	-0.602635	-1.96152	-0.645758	0.0394462	-0.98974	214.125	43.818	C11H19NOS	True	1.83375	0.000242548	0.0272958	-1.83375	Pyrrolo[1,2-d][1,4]thiazepin-5(4H)-one, 4-ethylhexahydro-4-methyl-, (4S,9aS)- (9CI)	16.4245	18.1197	16.53	17.4556	16.7681	16.3677	16.9997	15.7798	14.7343	15.3311	13.7431	15.2807	16.0814	14.8787
X80855	0.23458	1.69798	0.304664	0.391159	-0.149979	1.09368	1.83704	-0.666171	-0.613481	-0.892059	-0.309228	-0.350532	-1.10697	-1.47068	855.435	24.156	C45H58N8O9	False	3.34638	0.000243478	0.0273315	-3.34638	L-Tyrosyl-L-isoleucyl-L-histidyl-L-tyrosyl-L-isoleucyl-L-phenylalanine	10.7339	13.9026	10.8856	11.0729	9.90119	12.5941	14.2037	8.78349	8.89758	8.29437	9.55637	9.46694	7.82902	7.04149
X50902	0.142912	0.697972	0.979447	0.298683	0.107749	1.57867	1.74577	-0.603964	-0.758389	-1.33156	-0.43126	0.0205694	-1.22814	-1.21846	498.262	22.871	C26H40ClNO6	False	1.49324	0.000245603	0.0274291	-1.49324	8-O-acetyl 8-epi-malyngamide C	15.1574	15.6799	15.9449	15.304	15.1243	16.5091	16.6664	14.4542	14.3088	13.7692	14.6168	15.0422	13.8665	13.8757
X58089	-0.128806	-0.643737	-1.662	0.0514089	-1.34516	-1.62	-0.0410827	0.682696	1.13896	1.39951	0.247925	0.450591	1.12353	0.346176	555.322	23.318	C36H38N6	False	4.80637	0.000245796	0.0274291	4.80637	1,4-Piperazinedipropanamine, N,N'-di-9-acridinyl-	11.1142	9.50691	6.32854	11.6767	7.31749	6.45961	11.388	13.6472	15.0714	15.8846	12.2901	12.9227	15.0232	12.5968
X45683	0.0202885	0.287827	1.17963	0.620949	0.430632	1.46676	1.39599	0.15015	0.038981	-1.03157	-1.5017	-0.595957	-1.48091	-0.981066	457.219	21.807	C24H34O7	False	3.59585	0.000246194	0.0274291	-3.59585	5-[(1R,3aS,3bR,5aR,6R,7S,8R,9aR,9bS,11S,11aS)-3a,6,7,8,11-pentahydroxy-9a,11a-dimethyl-hexadecahydro-1H-cyclopenta[a]phenanthren-1-yl]-2H-pyran-2-one	13.7233	14.3466	16.4243	15.1227	14.6793	17.0933	16.9284	14.0259	13.7669	11.2728	10.1775	12.2876	10.2259	11.3904
X34408	-0.000621173	-1.19101	-0.380454	-0.130557	-1.80426	-1.04172	-0.914431	-0.379581	0.806035	1.27483	0.544548	1.0832	1.26341	0.870621	370.294	40.598	C19H41NO4	True	2.06085	0.000247095	0.0274608	2.06085	N-Decyl-2,5,8,11-tetraoxatridecan-13-amine	18.056	16.4843	17.5545	17.8844	15.6746	16.6814	16.8495	17.5556	19.121	19.74	18.7758	19.487	19.7249	19.2063
X64913	-0.633788	-0.340205	0.390992	-0.273878	-1.09717	-2	-1.38109	0.548755	0.667834	0.754883	0.984274	1.21265	0.383185	0.891861	612.782	19.029	C15H13Br3O8S	False	2.30625	0.000248023	0.0274954	2.30625	(2-{3-bromo-2-[(2,3-dibromo-4,5-dihydroxyphenyl)methyl]-4,5-dihydroxyphenyl}ethoxy)sulfonic acid	14.423	14.8584	15.9426	14.9567	13.7359	12.2365	13.3149	16.1766	16.3531	16.4822	16.8224	17.161	15.931	16.6853
X25410	0.10462	0.781751	0.169252	1.09634	0.423289	1.25673	1.61275	0.273721	-0.757607	-0.107837	-1.52953	-0.997429	-1.37242	-0.953623	304.162	21.302	C11H21N5O5	False	2.27648	0.000248746	0.0275071	-2.27648	gamma-L-glutamyl-L-arginine	13.7215	14.7123	13.816	15.1727	14.1878	15.4074	15.9284	13.9689	12.4597	13.4105	11.3301	12.1087	11.56	12.1728
X71790	0.63263	-0.806377	-1.52966	-0.572681	-1.10443	-1.29125	-0.708261	-0.24475	0.559591	1.22889	1.05664	0.709256	1.38659	0.683807	682.396	21.713	C27H53N11O8	False	5.84168	0.000250366	0.0275632	5.84168	L-Lysyl-N~5~-(diaminomethylidene)-L-ornithyl-L-glutaminyl-L-lysyl-L-threonine	14.0008	8.5321	5.7834	9.42022	7.39939	6.68943	8.90498	10.6665	13.7232	16.2668	15.6122	14.292	16.8661	14.1953
X7593	0.614502	0.298839	1.15744	-0.42674	1.02209	1.47969	1.28409	-0.00323701	-0.464369	-0.610481	-0.425941	-0.955778	-1.61596	-1.35413	159.027	12.758	C4H8O5	False	2.50667	0.000250491	0.0275632	-2.50667	Threonate|C01620	15.6842	15.1741	16.5614	14.0018	16.3427	17.0821	16.766	14.6861	13.941	13.7049	14.0031	13.147	12.0803	12.5033
X53576	1.28651	0.591625	-0.0927824	0.436297	1.69071	0.632867	0.835521	-1.071	-1.76276	-0.119837	-1.39509	-0.266004	-0.743342	-0.0227212	519.058	45.534	C21H20O12S	True	5.35623	0.000251965	0.0276572	-5.35623	{[6-(5,7-dihydroxy-4-oxo-2-phenyl-4H-chromen-6-yl)-3,4,5-trihydroxyoxan-2-yl]methoxy}sulfonic acid	16.1186	13.6976	11.3131	13.1564	17.5268	13.8413	14.5473	7.9049	5.49477	11.2188	6.77575	10.7095	9.04647	11.5572
X80639	0.214171	-0.893213	-1.14303	-1.22535	-0.399913	-0.397241	-1.5506	-0.53321	0.560918	0.908867	1.31567	0.823474	0.933693	1.38576	848.461	21.741	C38H61N11O11	False	3.66483	0.00025273	0.027673	3.66483	L-Glutaminyl-L-prolyl-N~5~-(diaminomethylidene)-L-ornithyl-L-phenylalanyl-L-threonyl-L-leucyl-L-serine	13.9045	11.2717	10.6778	10.4821	12.4445	12.4509	9.7088	12.1276	14.7289	15.5561	16.5233	15.3531	15.6152	16.6899
X33264	-0.600908	-0.404539	-0.776009	-1.76621	-1.25583	-0.102343	-0.52196	0.727313	0.784049	1.26774	1.4856	1.32944	-0.360999	0.194652	361.184	20.164	C15H30O8	False	2.43575	0.000256976	0.028069	2.43575	Aleppotrioloside	16.8308	17.1392	16.5558	15.0005	15.8021	17.6138	16.9548	18.9169	19.006	19.7657	20.1079	19.8627	17.2076	18.0803
X8845	-1.10832	-2	-0.251623	-0.733265	-1.13654	-0.0976653	-0.246806	1.16495	1.35678	0.788362	1.03358	0.617348	0.393238	0.293332	172.169	41.745	C10H21NO	True	1.18235	0.00026391	0.028728	1.18235	N,2,3-trimethyl-2-(propan-2-yl)butanamide	20.1476	19.4405	20.7754	20.4224	20.1269	20.8882	20.7789	21.8133	21.9539	21.5374	21.7171	21.4121	21.2479	21.1747
X30827	-0.694942	-0.648864	0.514368	-0.585207	-0.891983	-1.89598	-1.17442	0.284855	1.35964	0.492196	1.30509	1.19226	0.642221	0.100764	342.225	19.884	C17H29N5O	False	4.25988	0.000265323	0.028728	4.25988	N-[(E)-Amino(4-methoxyanilino)methylidene]-N''-octylguanidine	12.7901	12.9179	16.1433	13.0944	12.2437	9.45984	11.4606	15.5069	18.4871	16.0818	18.3359	18.023	16.4978	14.9965
X24821	0.0838293	0.139493	-1.53023	-1.5951	-0.896515	-0.247799	-1.32307	0.544486	0.429105	1.39246	0.759173	0.329231	0.440691	1.47425	300.149	21.955	C17H24ClN	False	5.33075	0.00026544	0.028728	5.33075	Piperidine, 4-(2,3-dihydro-2,2-dimethyl-1H-inden-1-ylidene)-1-methyl-, hydrochloride (9CI)	11.3037	11.4971	5.69513	5.46971	7.89718	10.1513	6.41499	12.9044	12.5035	15.8509	13.6504	12.1564	12.5437	16.1351
X59914	-1.56385	-0.347558	0.413373	-1.17344	-0.333737	-0.949419	-1.40644	1.53296	0.666808	0.00793752	1.16896	0.601787	0.235358	1.14726	570.29	20.083	C29H39N5O7	False	8.63376	0.000265588	0.028728	8.63376	Boc-D-Phe-Ala-Nle-p-nitroanilide	3.26906	10.1248	14.4139	5.46968	10.2027	6.73237	4.15633	20.7245	15.8424	12.1286	18.6728	15.4759	13.4105	18.5505
X45696	-0.733434	0.0581672	0.212805	-1.20077	-0.884217	-1.70338	-1.24052	0.707835	0.246249	0.414227	1.18764	1.46903	0.301664	1.1647	457.242	21.095	C22H34N4O5	False	1.68767	0.000267015	0.0287309	1.68767	L-Phenylalanyl-L-isoleucylglycyl-L-valine	14.3025	15.154	15.3204	13.7998	14.1403	13.2592	13.7571	15.8529	15.3563	15.537	16.369	16.6716	15.416	16.3443
X71955	0.338509	-0.870489	-0.530226	-0.656303	-0.814641	-1.92876	-1.03819	-0.211629	1.0062	1.15702	1.25507	0.922506	0.995564	0.375373	684.333	20.79	C31H47N7O9	False	1.63591	0.000267443	0.0287309	1.63591	(2S)-2-{2-[(6R)-6-{[(4aR,8S,11R,14S)-9,12-dihydroxy-14-methyl-11-(2-methylpropyl)-5,15-dioxo-3H,4H,4aH,5H,7H,8H,11H,14H,15H-pyridazino[3,2-c]1-oxa-4,7,10-triazacyclotridecan-8-yl]-C-hydroxycarbonimidoyl}-1,4,5,6-tetrahydropyridazin-1-yl]-2-oxoethyl}heptanoic acid	15.2864	14.0278	14.382	14.2508	14.0859	12.9261	13.8532	14.7137	15.9814	16.1384	16.2405	15.8943	15.9704	15.3247
X43241	0.409226	0.974407	1.00031	0.501324	1.05711	1.13336	0.373507	-0.597934	-1.23608	-1.39683	-1.53187	-0.894508	0.840428	-0.632442	438.238	31.125	C25H35O5	True	2.0103	0.000267862	0.0287309	-2.0103	Fascaplysin B	15.9286	16.6583	16.6918	16.0475	16.7651	16.8636	15.8825	14.6281	13.8042	13.5966	13.4222	14.2452	16.4853	14.5836
X56315	0.67055	0.530492	0.75388	1.16512	0.798554	0.388021	1.05401	0.142356	-0.00507531	-0.287464	-1.35953	-2	-0.394542	-1.30174	541.25	31.596	C33H35FN2O5	False	7.45806	0.000268194	0.0287309	-7.45806	Atorvastatin|C06834	14.6417	13.9597	15.0475	17.05	15.265	13.266	16.509	12.0697	11.3518	9.97674	4.75639	0.884685	9.45533	5.03779
X60133	-1.43527	-0.284368	0.650536	-1.60897	-0.585138	-0.788381	-1.32242	0.724887	0.919642	-0.110626	1.02515	0.845177	0.833708	1.13607	571.824	21.052	C11H12I3NO2	False	4.23635	0.000269224	0.0287721	4.23635	w/o MS2:MLS002154127-01!Iopanoic acid96-83-3	7.08982	10.2652	12.8447	6.61056	9.43538	8.87462	7.40117	13.0498	13.5872	10.7446	13.8783	13.3817	13.3501	14.1843
X64729	-1.19495	0.339136	-0.23927	-0.338246	-0.637749	-2	-1.24469	0.546614	0.32181	0.732198	1.15487	0.815158	0.945606	0.945399	611.313	22.51	C40H44O4	False	1.85742	0.000272928	0.0290981	1.85742	1H-Indene-1,3(2H)-dione, 2-[bis[3,5-bis(1,1-dimethylethyl)-4-oxo-2,5-cyclohexadien-1-ylidene]cyclopropylidene]-	13.6195	15.4455	14.757	14.6392	14.2827	12.4876	13.5603	15.6924	15.4249	15.9133	16.4164	16.0121	16.1674	16.1671
X17048	0.826716	0.804693	1.53072	0.943748	0.860751	-0.0527407	0.803242	-0.107946	0.126512	-1.59902	-0.777859	-1.37242	-0.979723	-1.00667	243.194	49.285	C15H26N	True	1.05594	0.000275851	0.0292006	-1.05594	1-decylpyridinium	17.0155	17.0012	17.4706	17.0911	17.0375	16.447	17.0003	16.4113	16.5628	15.4474	15.9782	15.5939	15.8477	15.8303
X2837	0.472598	1.40438	0.292489	0.46084	1.08888	0.210003	1.45021	-0.314335	-0.42372	-1.17623	-0.655222	-0.386462	-0.212583	-2	102.022	6.322	C2H4N3P	False	3.44248	0.000275887	0.0292006	-3.44248	3-Methyl-3H-1,2,3,4-triazaphosphole	13.6486	15.7356	13.2452	13.6223	15.0289	13.0604	15.8382	11.886	11.641	9.9556	11.1225	11.7245	12.1139	7.63826
X74732	-0.928189	0.102375	-0.0951435	-2	-0.407325	-0.915882	-0.628112	0.75119	0.890607	0.771725	1.18052	0.610646	0.631494	0.546589	721.341	20.589	C37H52O14	True	3.24621	0.000276653	0.0292006	3.24621	javanicinoside E	11.2074	13.3826	12.9657	7.86751	12.3068	11.2333	11.8408	14.7521	15.0464	14.7955	15.6583	14.4555	14.4995	14.3203
X36683	0.107106	1.62761	1.13414	1.02195	0.597147	0.852933	0.213337	0.102826	-1.22632	-1.05886	-1.8076	-0.461679	-0.829802	-0.272778	388.304	46.606	C17H37N7O3	False	1.37949	0.000276824	0.0292006	-1.37949	(S)-form-Gusperimus, INN	15.967	17.2887	16.8598	16.7623	16.393	16.6153	16.0593	15.9633	14.8079	14.9534	14.3026	15.4725	15.1525	15.6368
X72978	0.156902	2	0.385043	0.510116	0.827585	0.199905	1.0717	-0.065192	-1.39464	-0.738663	-0.665245	-0.461399	-0.668783	-1.41454	696.435	27.828	C37H61NO11	True	2.47295	0.000277373	0.0292006	-2.47295	Mycinamicin IV|C18846	15.1231	18.4842	15.4882	15.6883	16.1964	15.1919	16.587	14.7676	12.6401	13.6898	13.8073	14.1336	13.8017	12.6082
X29023	-1.01567	-0.257746	0.52241	-1.88259	-0.565268	-0.869446	-1.29951	0.610177	1.48635	0.643381	1.01146	0.995743	0.553316	0.0673839	329.217	20.286	C14H26N8	False	4.15556	0.000277821	0.0292006	4.15556	N'',N'''-Decane-1,10-diylbis(N-cyanoguanidine)	10.3851	12.4387	14.5526	8.03611	11.6055	10.7813	9.616	14.7904	17.1645	14.8804	15.8777	15.8351	14.6363	13.3197
X13511	0.897563	1.02749	0.61731	0.910816	0.74851	1.34338	0.142296	-0.55638	-0.71334	0.103811	-0.975643	-0.710327	-2	-0.631252	215.081	31.853	C8H17O3P	False	1.09319	0.000278532	0.0292065	-1.09319	2-ethoxy-4,4,5,5-tetramethyl-1,3,2-dioxaphospholane	16.3794	16.4668	16.1908	16.3883	16.2791	16.6793	15.8713	15.4012	15.2956	15.8454	15.1192	15.2977	14.2926	15.3509
X72874	1.44593	0.557756	0.317386	0.213444	1.11814	1.4136	0.293211	-0.998071	-1.18162	-1.76068	-0.529184	0.0345359	-1.13919	0.214739	695.348	25.702	C32H54O16	False	4.87562	0.000280806	0.0292782	-4.87562	Atractyloside E|C17862	16.1946	13.3666	12.6013	12.2703	15.1509	16.0916	12.5243	8.41281	7.82839	5.98465	9.90575	11.7007	7.96349	12.2744
X45605	0.0587172	1.58672	0.82043	1.36759	0.163304	0.494287	0.887207	0.419231	-0.584077	-1.10961	-1.69782	-0.613821	-1.25934	-0.532813	456.351	44.215	C26H49NO3S	False	3.29516	0.000280912	0.0292782	-3.29516	{[18-(4-Methylpiperidin-1-yl)-18-oxooctadecan-9-yl]sulfanyl}acetic acid	12.296	15.5727	13.9294	15.1028	12.5203	13.2301	14.0726	13.0691	10.9176	9.79069	8.52934	10.8539	9.4696	11.0276
X29315	0.34928	0.433065	1.42433	1.6915	0.259977	0.169129	1.26612	-0.17517	-0.622396	-0.779549	-0.692957	-0.327238	-1.50016	-1.49593	331.247	42.046	C17H32N4O	False	1.26229	0.000281186	0.0292782	-1.26229	Hoveyda-Snapper Desymmetrization Catalyst	14.7976	14.8638	15.6467	15.8578	14.7271	14.6553	15.5218	14.3833	14.0301	13.906	13.9744	14.2632	13.3368	13.3401
X45154	-0.177195	-0.367712	-0.601724	-0.501142	-0.423683	-1.60568	-1.82209	-0.109958	0.446094	1.19469	1.51658	0.647221	0.622263	1.18235	453.234	23.779	C21H32N4O7	False	1.57587	0.000281891	0.0292832	1.57587	HC Toxin III	14.7231	14.532	14.2973	14.3982	14.4759	13.2904	13.0733	14.7906	15.3483	16.0991	16.4219	15.55	15.525	16.0867
X28866	0.347108	1.72124	0.539051	0.707842	1.11065	0.712561	0.379846	-0.17913	-1.17912	-1.86215	-1.36787	-0.649122	-0.0461503	-0.234749	328.21	42.885	C16H35NS2	False	1.48484	0.000283843	0.0292976	-1.48484	2-(Hexylsulfanyl)-N-[2-(hexylsulfanyl)ethyl]ethan-1-amine	16.4706	17.7647	16.6513	16.8103	17.1896	16.8147	16.5014	15.975	15.0332	14.39	14.8555	15.5324	16.1002	15.9226
X5661	-0.154762	1.24609	1.16535	0.902167	1.00772	0.83338	0.521445	0.233788	-1.19069	-1.57814	-1.62106	-0.596161	-0.50181	-0.267305	137.059	49.297	C3H9ClN4	False	1.47178	0.000284103	0.0292976	-1.47178	Propanediimidamide--hydrogen chloride (1/1)	15.9793	17.2862	17.2109	16.9653	17.0638	16.9012	16.6101	16.3418	15.0128	14.6513	14.6113	15.5675	15.6555	15.8743
X53733	-0.81262	0.318151	-0.693624	-1.6556	-0.394481	-0.34544	-1.77089	0.700955	0.300421	0.817786	1.35664	0.703225	0.0553088	1.42017	520.31	20.397	C29H45NO5S	False	5.21742	0.000284542	0.0292976	5.21742	(4S,5R,7R,8S,9S,11R,15Z,18S)-4,8-dihydroxy-5,7,9,11,15-pentamethyl-18-[(1E)-1-(2-methyl-1,3-thiazol-4-yl)prop-1-en-2-yl]-1-oxacyclooctadec-15-ene-2,6-dione	8.79579	12.6522	9.20162	5.92088	10.2218	10.3891	5.52773	13.9577	12.5917	14.3561	16.1938	13.9654	11.7558	16.4105
X35014	-0.0084123	-0.890484	0.0134307	-1.26956	-1.15989	-1.14162	-0.993801	-0.353893	1.0523	0.738372	1.68043	1.1693	0.186573	0.97726	375.199	20.198	C16H32O8	False	1.86888	0.00028466	0.0292976	1.86888	methyl 6-deoxy-1,3-di-O-methyl-beta-D-ribo-hexosyl-(1->4)-2,6-dideoxy-3-O-methyl-alpha-D-arabino-hexopyranoside	15.9335	14.8749	15.9598	14.42	14.5516	14.5735	14.7509	15.5189	17.2065	16.8298	17.9604	17.3469	16.1675	17.1165
X55656	-0.653352	-0.235346	-1.77612	-0.188051	-0.13512	-0.874699	-1.61487	-0.082569	0.542564	1.28885	0.686983	0.646455	1.52612	0.869155	535.302	20.999	C31H44O6	False	1.6727	0.000285933	0.0293608	1.6727	6,7'-bis(2-hydroxypropan-2-yl)-4,5',8a,9'a-tetramethyl-3,3'a,4',5,6,6',7,7',8,8',8a,9',9'a,9'b-tetradecahydro-1H,3'H-spiro[naphthalene-2,2'-naphtho[1,2-b]furan]-3,3',4'-trione	15.6288	16.0756	14.4288	16.1261	16.1827	15.3922	14.6011	16.2389	16.907	17.7047	17.0614	17.0181	17.9583	17.2561
X38437	-0.041327	-1.54401	-1.84475	-0.482676	0.311936	-0.388624	-1.36141	0.404777	0.860469	1.18678	0.763737	0.195099	0.795872	1.14413	402.236	21.4	C20H33N3O4	False	5.44518	0.000287762	0.0294624	5.44518	Bis[2-(diethylamino)ethyl] 3-aminobenzene-1,2-dicarboxylate	12.2467	6.89461	5.82347	10.6748	13.5049	11.0097	7.54499	13.8356	15.4586	16.6208	15.1141	13.0888	15.2286	16.4689
X17079	1.20425	1.34158	0.273915	0.940349	1.13504	0.809362	0.106203	-0.551161	-0.642067	0.0406423	-1.44821	-1.36405	-1.40082	-0.445036	243.231	46.452	C15H30O2	False	0.942969	0.000288764	0.0294624	-0.942969	methyl tetradecanoate	17.3212	17.3992	16.7928	17.1713	17.2819	17.0969	16.6976	16.3242	16.2725	16.6603	15.8147	15.8625	15.8416	16.3845
X11887	-1.62633	-1.436	-1.00887	-0.191293	-0.225005	-0.683058	-0.464262	1.36532	1.27974	1.0371	0.590956	-0.205516	1.1766	0.390612	200.2	48.87	C12H25NO	True	1.16215	0.000289203	0.0294624	1.16215	(2R,3S)-clavaminol B	16.6574	16.7948	17.1031	17.6933	17.6689	17.3383	17.4962	18.8169	18.7551	18.58	18.2579	17.683	18.6807	18.1133
X32731	0.118834	-0.846056	-0.345456	-0.83752	-1.54862	-1.54669	-0.435902	-0.329542	0.837979	1.11291	1.19722	1.12552	1.29561	0.201694	357.217	20.997	C21H25NO3	False	1.91084	0.000289567	0.0294624	1.91084	Nalmefene|C08027	18.9223	17.7364	18.3517	17.7469	16.8729	16.8753	18.2405	18.3712	19.8062	20.1441	20.2478	20.1596	20.3687	19.0242
X67795	-0.498137	-1.03028	-0.240128	-0.25453	-0.793608	-0.73468	-1.88057	0.0473914	1.22821	-0.154832	0.627533	1.5168	0.705897	1.46093	640.376	20.412	C39H49N3O5	True	1.99119	0.000290776	0.0295181	1.99119	NSC324000	11.4272	10.7445	11.7582	11.7398	11.0481	11.1237	9.65356	12.1271	13.6421	11.8677	12.8715	14.0124	12.972	13.9407
X31247	-0.210543	-0.954414	-0.159455	-1.37435	-1.27408	-0.540943	-0.963502	-0.258854	0.802562	0.868855	1.4288	1.25746	-0.100539	1.47901	345.193	19.443	C14H27N5O3P	False	1.64058	0.00029305	0.0296813	1.64058	N,N,N',N'-Bis(1,2-ethanediyl)-N''-(1-oxyl-2,2,6,6-tetramethyl-4-piperidinylaminocarbonyl)phosphoric triamide	16.2135	15.4337	16.2671	14.9934	15.0986	15.8671	15.4242	16.1629	17.2756	17.3451	17.9321	17.7525	16.3288	17.9847
X44007	-0.0801391	-0.852666	-2	-0.169366	-1.42755	-0.0899788	-0.726608	0.295391	0.889113	1.45811	0.948955	1.26268	0.309884	0.190388	444.207	19.343	C27H32ClNO	False	3.94156	0.000297879	0.0300615	3.94156	N,N-Diethyl-1-(triphenylmethoxy)but-3-en-2-amine--hydrogen chloride (1/1)	10.1454	8.15505	5.1779	9.91551	6.67391	10.12	8.47983	11.1129	12.6426	14.1086	12.7968	13.605	11.1503	10.8424
X53621	-0.416993	-0.151244	-0.00125616	-2	-0.714377	-0.387861	-1.23386	0.680963	0.98272	0.807685	0.977181	0.548964	0.27277	1.08915	519.285	20.739	C31H38N2O5	False	3.57937	0.000298153	0.0300615	3.57937	2H-1,3-Dazepin-2-one, hexahydro-5,6-dihydroxy-1-(5-hydroxypentyl)-3-((3-hydroxyphenyl)methyl)-4,7-bis(phenylmethyl)-, (4R,5S,6S,7R)-	12.61	13.2312	13.5818	7.84883	11.9149	12.6781	10.7006	15.1765	15.8819	15.4727	15.8689	14.868	14.2223	16.1307
X47724	-0.55767	-0.205683	-1.15161	-0.357052	-1.07089	-1.86865	-0.160771	0.245019	0.221155	1.48693	0.982509	1.11015	1.41525	-0.0886962	472.27	21.176	C27H37NO6	False	2.92745	0.000300323	0.030212	2.92745	deoxyyuzurimine	15.3922	16.0636	14.2595	15.7749	14.4134	12.892	16.1492	16.9231	16.8776	19.2917	18.3297	18.5731	19.155	16.2867
X81671	0.51886	-0.842178	-1.3957	-1.3102	-0.482073	-0.818467	-1.0192	-0.270651	1.06821	1.45087	1.33742	0.273191	0.496715	0.993207	884.592	49.807	C40H77NO8	True	4.063	0.00030335	0.030381	4.063	w/o MS2:C16 Galactosyl(?) Ceramide (d18:1/16:0)	12.9864	9.36803	7.89646	8.12377	10.3254	9.43107	8.89741	10.8875	14.4469	15.4642	15.1626	12.3333	12.9276	14.2475
X70421	0.132428	-0.634935	-2	-0.669806	-0.549035	-1.03684	-0.561064	-0.150038	0.242885	1.45031	1.12789	0.880997	1.31472	0.506929	667.351	21.797	C35H54O10S	False	2.79989	0.000303922	0.030381	2.79989	3beta-[(2-O-sulfo-beta-D-xylopyranosyl)oxy]urs-12,19-diene-28-oic acid	13.6813	12.2819	9.69328	12.2183	12.4386	11.549	12.4166	13.1662	13.8828	16.0846	15.4967	15.0464	15.8374	14.3643
X47307	-0.661475	0.145686	-0.746317	-0.105118	-1.22096	-1.80454	-0.982927	0.0749356	0.149729	1.45194	1.118	1.21003	1.17019	0.200833	469.263	21.905	C30H39OP	False	2.74219	0.000304049	0.030381	2.74219	Oxotris(2,3,5,6-tetramethylphenyl)-lambda~5~-phosphane	15.3301	16.7712	15.1787	16.3235	14.3312	13.2893	14.7562	16.6449	16.7785	19.1034	18.5072	18.6715	18.6004	16.8697
X73995	-0.425247	0.104957	-2	-0.385116	-1.19206	-0.349559	-0.710284	0.844008	0.116662	1.31709	0.967163	0.763952	0.591538	0.748895	710.363	21.568	C36H53N3O10	False	3.8205	0.000306846	0.0305068	3.8205	lajollamycin	11.4417	12.7671	6.52539	11.542	9.5249	11.6309	10.7292	14.6145	12.7963	15.7971	14.9223	14.4144	13.9834	14.3767
X55063	-0.230611	-0.19224	0.33522	-1.4452	-0.767554	-1.31454	-1.72297	-0.0348509	0.863477	0.42612	1.26875	0.936974	0.588909	1.28851	530.795	18.629	C13H9Br3O8	False	5.05843	0.000307476	0.0305068	5.05843	symphyocladin E	10.421	10.5482	12.2977	6.39243	8.64004	6.82583	5.47116	11.0702	14.0498	12.5992	15.394	14.2936	13.1391	15.4595
X55659	-1.63953	-0.263161	-0.547575	-0.797845	-0.909944	-1.23814	-0.026384	0.537833	0.66608	1.41094	1.22826	1.1057	1.0668	-0.593024	535.302	20.823	C31H44O6	False	1.94932	0.000307993	0.0305068	1.94932	6,7'-bis(2-hydroxypropan-2-yl)-4,5',8a,9'a-tetramethyl-3,3'a,4',5,6,6',7,7',8,8',8a,9',9'a,9'b-tetradecahydro-1H,3'H-spiro[naphthalene-2,2'-naphtho[1,2-b]furan]-3,3',4'-trione	13.5146	15.2463	14.8885	14.5736	14.4325	14.0196	15.5442	16.2541	16.4155	17.3526	17.1228	16.9686	16.9196	14.8313
X41549	-1.00642	-1.1475	-1.12875	-0.379664	-1.49399	0.0577356	-0.42272	0.519584	0.702062	1.78822	0.462796	1.58468	0.381167	0.0827935	426.198	22.17	C18H27N5O7	False	1.39966	0.000308046	0.0305068	1.39966	NSC317316	15.343	15.2179	15.2345	15.8991	14.9104	16.2872	15.8609	16.697	16.8589	17.8226	16.6466	17.642	16.5742	16.3095
X62534	-0.423398	-0.601185	-0.289371	-1.20939	-0.841355	-1.88223	-0.1453	0.306715	0.883819	0.991762	1.4814	0.943136	1.22633	-0.440941	592.306	21.146	C25H43N7O8	False	2.29974	0.000310339	0.0306658	2.29974	L-Glutaminylglycylglycyl-L-isoleucyl-L-prolyl-L-valine	13.9631	13.6977	14.1631	12.7898	13.3392	11.7854	14.3782	15.0529	15.9144	16.0755	16.8064	16.0029	16.4257	13.9369
X25908	-0.418362	-1.24846	-0.92103	-0.026834	-0.730013	-1.78014	-0.358948	0.0103382	0.302674	1.0412	1.4343	1.16494	1.40766	0.122682	307.696	22.118	C36H49N5O8S	False	1.53081	0.000312415	0.0308026	1.53081	w/o MS2:MLS001401425-01!Indinavir Sulfate157810-81-6	16.7388	15.9278	16.2477	17.1214	16.4343	15.4083	16.7969	17.1577	17.4433	18.1649	18.5489	18.2858	18.5229	17.2674
X39838	-0.549068	-0.701071	-0.345775	-0.367063	-0.904064	-2	-0.564163	0.00700086	0.606023	1.77034	0.928737	1.031	1.04193	0.117583	413.211	22.075	C28H28O3	False	1.44489	0.000315303	0.0310187	1.44489	6-[3-(adamantan-1-yl)-4-methoxyphenyl]naphthalene-2-carboxylic acid	15.025	14.8853	15.2119	15.1923	14.6988	13.6259	15.0111	15.5361	16.0866	17.1566	16.3832	16.4772	16.4872	15.6377
X71601	1.8518	1.47394	0.230932	0.740701	0.812261	0.0794951	0.15636	-1.66206	-1.3177	-0.693384	-0.854469	-0.0322178	-0.60084	-0.184814	680.411	45.486	C36H53N7O6	False	3.61056	0.0003162	0.0310253	-3.61056	(3S)-3-{[(1S,3aR,6aS)-2-[(2S)-2-[(2S)-2-cyclohexyl-2-(pyrazin-2-ylformamido)acetamido]-3,3-dimethylbutanoyl]-octahydrocyclopenta[c]pyrrol-1-yl]formamido}-N-cyclopropyl-2-oxohexanamide	19.1034	18.2101	15.2716	16.4767	16.6459	14.9136	15.0953	10.7965	11.6105	13.0864	12.7056	14.6495	13.3052	14.2887
X64156	-0.151712	0.0971069	-0.940999	-0.521138	-0.591198	-1.74882	-1.49141	-0.387883	0.334701	0.872129	1.16402	1.00492	1.13049	1.2298	606.335	22.127	C28H52N3O7PS	False	3.4026	0.000317452	0.0310253	3.4026	(3R,4E)-3-Hydroxy-2-({5-[(3aS,4S,6aR)-2-oxohexahydro-1H-thieno[3,4-d]imidazol-4-yl]pentanoyl}amino)octadec-4-en-1-yl dihydrogen phosphate	11.7204	12.2744	9.96281	10.8977	10.7417	8.16399	8.73718	11.1945	12.8035	14.0002	14.6502	14.2959	14.5755	14.7967
X40130	0.629989	-0.583176	-0.757082	-1.1355	-0.321804	-1.23056	-1.92567	0.1026	0.810228	0.868132	1.2175	0.301715	0.883562	1.14007	415.359	43.4	C28H46O2	False	6.96569	0.000317458	0.0310253	6.96569	5alpha-Ergosta-7,22-diene-3beta,5-diol|C04416	12.0405	6.48495	5.68856	3.95563	7.68188	3.5203	0.337101	9.6254	12.8659	13.1311	14.731	10.5372	13.2017	14.3764
X36340	-0.595691	-0.672562	0.101488	-0.917702	-1.48847	-1.57305	-0.301507	0.041088	0.651467	1.10513	1.6267	1.34591	0.00315089	0.674058	386.211	19.144	C26H27NO2	False	1.68803	0.000320283	0.0312328	1.68803	JWH-098	16.049	15.9657	16.8052	15.6998	15.0808	14.989	16.3681	16.7396	17.4016	17.8937	18.4593	18.1548	16.6985	17.4261
X40898	0.0555835	1.1201	0.821262	0.199077	0.945949	1.07461	1.11406	0.60788	-0.873815	-1.95625	-0.361426	-0.811761	-0.727559	-1.2077	421.257	28.339	C23H34N4O2	False	4.46198	0.000323188	0.0314082	-4.46198	BRN 6010553	12.6421	15.7608	14.8853	13.0625	15.2506	15.6275	15.7431	14.2602	9.91931	6.74814	11.4204	10.1011	10.3478	8.94114
X36800	0.00891262	-0.492641	-1.2631	-0.899281	-0.553281	-0.569544	-1.61458	-0.549561	0.32631	1.61319	1.19025	0.852834	0.804045	1.14645	389.233	22.572	C24H28N4O	False	2.27889	0.000323834	0.0314082	2.27889	5-[3-(2-(dimethylamino)ethyl)indol-1-yl]-6-hydroxy-N2-methyl-1,2,3,4-tetrahydro-beta-carboline	14.9679	14.2248	13.0833	13.6224	14.135	14.1109	12.5626	14.1405	15.4382	17.3448	16.7182	16.2183	16.146	16.6533
X24281	-1.35205	0.0267044	0.0882337	-1.66129	-0.848623	-1.62122	0.0441507	0.973735	0.738612	0.408654	1.29985	0.853604	0.984881	0.0647467	296.177	20.235	C17H26ClNO	False	5.39206	0.000324196	0.0314082	5.39206	Pyridine, 1,2,3,6-tetrahydro-1-(2-(thymyloxy)ethyl)-, hydrochloride	7.64951	12.5368	12.7549	6.55335	9.43399	6.69539	12.5986	15.8937	15.0602	13.8906	17.0497	15.4679	15.9332	12.6716
X13288	1.48324	0.376856	1.92907	-0.296469	1.36358	0.115116	0.519191	-0.418059	-0.799756	-1.14625	-0.544488	-0.961838	-0.958772	-0.661423	213.111	43.343	C10H14N4	True	1.43269	0.000335076	0.0322569	-1.43269	4,4',5,5'-Tetramethyl-2,2'-bisimidazole	16.7853	15.7749	17.1925	15.16	16.676	15.5358	15.9049	15.0489	14.7003	14.3839	14.9334	14.5523	14.5551	14.8266
X73191	-1.66009	-1.20286	-0.975199	-0.0307951	-1.11947	0.4582	-0.905375	0.866836	0.0603853	1.47001	0.551121	1.07451	0.397968	1.01476	699.339	22.803	C39H46N4O8	False	1.69269	0.000335174	0.0322569	1.69269	5-{3-[(6-Aminohexyl)amino]-3-oxoprop-1-en-1-yl}-1-{5-O-[bis(4-methoxyphenyl)(phenyl)methyl]-2-deoxypentofuranosyl}pyrimidine-2,4(1H,3H)-dione	16.8291	17.3275	17.5756	18.6049	17.4184	19.1379	17.6517	19.5833	18.7043	20.2407	19.2392	19.8096	19.0723	19.7445
X14227	1.26737	1.24507	0.446799	0.449154	0.132117	1.43019	0.505462	-0.865899	-1.05713	-0.608606	-1.86492	0.0918252	-1.18305	0.0116242	221.116	48.486	C14H16N	False	1.486	0.000335911	0.0322569	-1.486	6-(4-Chlorophenoxy)-9-methylpurine	18.3767	18.3555	17.5974	17.5996	17.2985	18.5313	17.6531	16.3506	16.169	16.595	15.4018	17.2602	16.0494	17.1841
X26291	0.4794	1.487	1.15444	0.668062	0.351492	1.10471	0.323248	-0.263425	-1.19776	-1.30376	-1.90711	-0.158214	-0.679902	-0.0581893	310.2	47.783	C16H25N5	False	1.21284	0.000337187	0.0322569	-1.21284	2-(Piperazin-1-yl)-4-(pyrrolidin-1-yl)-5,6,7,8-tetrahydroquinazoline	16.8257	17.5938	17.3403	16.9695	16.7282	17.3024	16.7066	16.2594	15.5471	15.4663	15.0064	16.3396	15.9419	16.4159
X49063	0.89832	0.182438	0.904595	0.642108	0.333391	1.4274	1.33665	-0.559577	-1.30459	0.348144	-0.926972	-0.970944	-1.59441	-0.716548	483.244	30.534	C22H34N4O8	False	0.982186	0.000337194	0.0322569	-0.982186	L-Tyrosine, L-seryl-L-threonyl-L-leucyl-	15.2245	14.7946	15.2283	15.0706	14.8853	15.5422	15.4877	14.3491	13.9017	14.8941	14.1284	14.102	13.7277	14.2548
X33890	0.494586	1.70249	1.01435	0.844757	0.980547	0.440959	0.0674925	-0.25447	-1.23164	-1.68211	-1.46506	-0.498832	-0.0302021	-0.382859	366.226	47.77	C18H33NO5	False	1.26349	0.000338254	0.0322569	-1.26349	(2S,3S,4S)-2-hydroxymethyl-3,4-dihydroxy-5-(10-oxo-13-hydroxytridecyl)-5-pyrroline	15.7373	16.7006	16.1518	16.0166	16.1249	15.6945	15.3967	15.1399	14.3607	14.0014	14.1745	14.9451	15.3188	15.0376
X53954	-0.100208	-1.33099	-0.161716	0.102065	-0.808724	-1.09217	-2	-0.037781	0.847266	0.91896	1.1338	0.997546	0.773155	0.815117	522.355	42.011	C26H52NO7P	False	1.60744	0.000338528	0.0322569	1.60744	(2-{[(2R)-2-hydroxy-3-[(11Z)-octadec-11-enoyloxy]propyl phosphonato]oxy}ethyl)trimethylazanium	15.0433	13.7723	14.9798	15.2522	14.3117	14.019	13.0233	15.1078	16.0218	16.0958	16.3176	16.1769	15.9452	15.9886
X70318	-2	0.0920804	-0.0788558	-0.329209	-0.546477	-0.739812	-1.77177	0.553793	0.291949	1.01436	0.766577	1.31545	0.641869	0.810816	666.328	20.181	C37H44O10	True	1.99859	0.000338746	0.0322569	1.99859	Gnididin|C09096	10.9565	13.6961	13.4745	13.1499	12.8681	12.6175	11.2794	14.2948	13.9553	14.892	14.5707	15.2824	14.409	14.628
X69624	-0.91029	0.557993	-0.162171	-1.67987	-0.895222	-1.16746	-1.15499	0.859382	0.111753	0.849316	1.03917	1.23951	0.125891	1.18698	658.337	19.985	C36H51NO8S	False	1.83279	0.000340168	0.0322697	1.83279	Polymastiamide D	13.8937	15.6341	14.7805	12.9816	13.9116	13.5889	13.6037	15.9913	15.1051	15.9794	16.2044	16.4419	15.1219	16.3796
X70492	-0.352382	0.148151	-0.333795	-1.73555	-0.236532	-1.97406	-0.870716	0.60771	0.368221	0.711804	1.33297	0.403754	1.28511	0.645323	668.323	24.271	C25H43N13O10	False	2.59487	0.000340695	0.0322697	2.59487	Viomycin|C01540	12.7921	13.641	12.8236	10.4462	12.9886	10.0417	11.913	14.4204	14.0142	14.597	15.6505	14.0745	15.5693	14.4842
X55478	0.0522242	-0.900682	-0.0782713	-1.0983	-1.63045	-0.618384	-1.0963	-0.276056	1.14337	1.40729	1.12899	1.37013	0.161621	0.434827	534.27	20.183	C29H35N5O5	False	2.29526	0.000341053	0.0322697	2.29526	Ergobutine	17.0232	15.5977	16.828	15.3021	14.506	16.02	15.3051	16.5321	18.6555	19.0503	18.634	18.9947	17.1868	17.5955
X30977	-1.28317	-0.0308348	-0.857394	-1.13369	-1.49307	-0.487405	-0.0869374	1.32694	0.699904	1.31918	1.19758	1.16747	-0.0905972	-0.247985	343.202	20.056	C20H23NO3	False	2.24414	0.000342439	0.0323322	2.24414	Benalaxyl|C10929	17.8562	19.6871	18.4787	18.0748	17.5494	19.0196	19.6051	21.6722	20.7555	21.6608	21.4831	21.439	19.5998	19.3697
X10296	0.213801	1.6618	0.527817	0.591354	1.49731	0.528214	0.393984	0.457795	-1.177	-1.0958	-1.59754	-0.97868	-0.339357	-0.683705	186.184	47.097	C11H23NO	False	1.76921	0.000348794	0.0327327	-1.76921	Oxime-2-Undecanone	14.7138	16.3699	15.0729	15.1456	16.1817	15.0734	14.9199	14.9929	13.1232	13.216	12.6422	13.35	14.0812	13.6873
X68103	-1.43308	-0.130726	-0.0530907	-1.61333	-0.824647	-1.49999	0.249048	0.990915	0.688025	0.484324	1.34557	0.832119	1.0626	-0.0977254	643.28	20.015	C30H53BrO8	False	5.71378	0.000348848	0.0327327	5.71378	aplysiol A	6.82505	11.7338	12.0264	6.14568	9.11832	6.57289	13.1652	15.9614	14.8198	14.052	17.2981	15.3629	16.2316	11.8582
X59679	0.797913	1.44362	0.525574	1.53357	-0.586594	1.2813	0.353291	-0.773336	-0.789303	-1.3988	-1.03266	0.215162	-0.689535	-0.880206	568.295	19.782	C21H41N7O11	False	2.60774	0.00034893	0.0327327	-2.60774	3'-Deoxydihydrostreptomycin|C03755	15.688	16.7898	15.2232	16.9433	13.3254	16.5128	14.9292	13.0068	12.9795	11.9395	12.5642	14.6935	13.1498	12.8244
X44931	0.186521	-0.0357661	-1.56237	-1.02727	-0.527705	-1.24999	-1.10563	0.00840698	0.697283	1.64716	1.36945	0.0219172	0.584147	0.993855	451.313	49.807	C23H44N2O5	False	3.60702	0.000349619	0.0327327	3.60702	Fluvirucin A1	13.7879	13.2607	9.63947	10.9088	12.0938	10.3805	10.7229	13.3654	14.9995	17.2526	16.5939	13.3975	14.7311	15.703
X32872	-0.0205487	1.68362	0.782551	1.36241	0.0180921	0.938459	0.614249	0.0182827	-1.05109	-0.864706	-1.79711	-0.36343	-1.07955	-0.241228	358.211	43.672	C20H31O4	False	2.07712	0.00035145	0.0327927	-2.07712	[(4Z,6E,10Z,13Z)-1-carboxynonadeca-4,6,10,13-tetraen-8-yl]peroxy	14.7362	17.0395	15.8217	16.6054	14.7884	16.0324	15.5942	14.7887	13.3433	13.5952	12.335	14.2728	13.3049	14.4379
X5654	0.285728	0.0288212	1.78772	0.260483	0.216709	1.4461	1.34461	-0.148805	-0.166296	-1.00301	-0.642606	-0.726463	-1.57801	-1.10497	137.045	12.889	C5H8NO2	False	2.18348	0.000351922	0.0327927	-2.18348	Cyclopentane, nitro-, ion(1-)	15.0635	14.6979	17.201	15.0276	14.9653	16.7148	16.5704	14.4451	14.4202	13.2295	13.7424	13.6231	12.4113	13.0844
X24738	0.663881	1.13601	1.91636	0.319437	1.39323	-0.0618108	0.367993	-0.491147	-0.607705	-1.14606	-0.954815	-1.37793	-0.508942	-0.6485	299.257	47.773	C18H36O4	True	0.957656	0.000354373	0.0327927	-0.957656	(9R,10R)-Dihydroxyoctadecanoic acid|C08314	17.4847	17.7606	18.2167	17.2834	17.911	17.0606	17.3118	16.8097	16.7415	16.4269	16.5387	16.2914	16.7993	16.7177
X48731	-1.35801	-0.646143	-0.714184	-0.60635	-0.622558	-1.4393	-0.17879	0.240598	0.889934	1.81544	0.56488	0.813896	1.47841	-0.237829	480.268	23.907	C28H37N3O2S	False	1.19158	0.000354433	0.0327927	1.19158	NSC270299	14.0109	14.5443	14.4934	14.5742	14.562	13.95	14.8946	15.2088	15.6954	16.389	15.4519	15.6385	16.1364	14.8503
X17149	-1.2393	-2	0.0226383	-0.220097	-1.52217	-0.437166	-0.019009	0.912017	0.918668	0.504908	0.550447	1.20447	0.984146	0.36954	244.153	44.318	C11H19N5	True	1.56233	0.000356277	0.0327927	1.56233	Triazine, 2-amino-4-butyl-6-pyrrolidino-	18.6692	17.876	19.9367	19.6929	18.3851	19.4749	19.8949	20.83	20.8367	20.4211	20.4668	21.1237	20.9025	20.2851
X65084	-0.25122	-0.939833	0.224829	-0.520432	-0.879466	-1.42901	-1.52322	-0.545502	0.971568	0.414172	1.1234	1.04857	1.43833	0.867817	614.824	21.15	C12H13I3N2O3	False	3.56472	0.000356451	0.0327927	3.56472	w/o MS2:MLS002154025-01!Iocetamic acid16034-77-8	13.9348	12.3193	15.0516	13.3032	12.4609	11.1717	10.9508	13.2444	16.8034	15.4957	17.1595	16.984	17.8984	16.56
X43739	-0.831217	0.223396	-1.17169	0.0821106	-1.43722	-1.14554	-1.0651	0.414895	-0.107946	1.57346	0.646059	1.1216	1.39271	0.304478	442.238	22.43	C29H31NO3	False	2.55184	0.000357606	0.0327927	2.55184	1H-Cyclopent(f)isoquinoline, 2,3,4,7,8,9-hexahydro-5,6-dimethoxy-3-(3,3-diphenylpropionyl)-	16.0313	17.7935	15.4624	17.5574	15.0187	15.5061	15.6405	18.1134	17.2398	20.0493	18.4997	19.2943	19.7473	17.929
X74060	-1.28165	-0.167125	-1.33068	0.263062	-0.393645	-1.84281	-0.815797	1.01284	0.764326	1.4023	0.487855	0.365791	1.03785	0.497694	711.281	48.349	C33H52O11S2	True	1.17904	0.000358428	0.0327927	1.17904	Orthoesterol A disulfate	13.8268	14.6527	13.7904	14.9715	14.4848	13.4109	14.172	15.5271	15.3429	15.8157	15.1381	15.0476	15.5456	15.1453
X37478	-0.653156	-0.840793	-0.233806	-0.976422	-1.12446	-1.71995	0.196737	0.21143	0.914262	0.905526	1.57381	1.08369	1.04758	-0.384441	394.189	21.096	C24H25N3O	False	2.39849	0.000359042	0.0327927	2.39849	Swr 00151	15.1335	14.8392	15.7913	14.6264	14.3942	13.4602	16.4666	16.4896	17.5921	17.5784	18.6266	17.8578	17.8012	15.555
X11146	-0.838211	-1.1343	-1.21776	0.218189	-1.38937	-0.997125	-0.327	0.794448	1.40563	0.978827	1.16631	-0.158845	1.18221	0.316985	194.08	36.476	C11H11N2	False	1.00506	0.000359193	0.0327927	1.00506	1-Amino-4-phenylpyridin-1-ium	17.3423	17.1591	17.1075	17.9959	17.0013	17.244	17.6586	18.3525	18.7306	18.4666	18.5826	17.7627	18.5924	18.0571
X69748	1.38652	0.859484	-0.276981	0.641286	1.35971	1.18961	0.141041	-0.926554	-1.03433	-1.00813	-1.17393	-0.304129	-1.37216	0.518568	659.642	26.194	C34H78N10O2	False	5.11293	0.000360933	0.0327927	-5.11293	3,6,9,12-Tetraazaheneicosan-21-amide, 1-amino-N-[2-[[2-[[2-[(2-aminoethyl)amino]ethyl]amino]ethyl]amino]ethyl]-13-(1-hydroxynonyl)-	16.2485	14.4692	10.6324	13.7325	16.158	15.5837	12.0437	8.43946	8.07561	8.16405	7.6043	10.5408	6.93508	13.3182
X32112	0.140554	1.59826	1.08204	0.845689	0.561943	1.01724	0.246514	-0.0656068	-1.14317	-1.08782	-2	-0.441025	-0.644938	-0.106631	352.268	45.805	C21H37NOS	True	1.36084	0.000361749	0.0327927	-1.36084	10-[(3,7-Dimethylocta-2,6-dien-1-yl)oxy]decyl thiocyanate	16.6823	17.9465	17.4988	17.2938	17.0478	17.4426	16.7742	16.5036	15.5691	15.6171	14.8234	16.178	16.0012	16.468
X70347	0.00696614	-0.291552	-2	-1.46469	-1.47519	0.114349	-0.183433	0.79835	0.545848	1.0729	1.12173	0.635425	0.428505	0.716095	666.396	43.562	C32H60NO11P	False	3.32682	0.000362215	0.0327927	3.32682	1-Palmitoyl-2-(5-hydroxy-8-oxo-6-octenedioyl)-sn-glycero-3-phosphocholine|C13898	10.5184	9.8649	6.06941	7.29671	7.27373	10.7535	10.1016	12.2509	11.6981	12.8519	12.9588	11.8942	11.4412	12.0708
X61847	-0.467635	0.0309529	-0.347128	-0.327616	-0.824615	-2	-1.45541	0.390982	0.527711	1.31733	1.35971	1.14763	0.211902	0.473882	586.8	19.486	C15H20Br4O3	False	1.61746	0.000362388	0.0327927	1.61746	(2S,3R,5R)-2-[(R)-bromo[(2R,3R,5S,6R)-3,5-dibromo-6-ethyloxan-2-yl]methyl]-5-[(1R)-1-bromoprop-2-yn-1-yl]oxolan-3-ol	14.2089	14.7288	14.3346	14.3549	13.8367	12.5718	13.179	15.1042	15.2468	16.0702	16.1143	15.8932	14.9175	15.1907
X74824	-1.58556	-0.321173	-0.932662	0.401699	-0.497478	-0.764669	-1.65505	0.32327	0.0414502	1.06553	0.347166	1.04547	1.51054	1.02147	722.381	24.85	C31H51N11O7S	False	2.30165	0.000362864	0.0327927	2.30165	N~5~-(Diaminomethylidene)-L-ornithyl-L-prolyl-L-histidyl-L-prolyl-L-leucyl-L-cysteine	11.7738	13.6759	12.756	14.7634	13.4107	13.0088	11.6693	14.6454	14.2215	15.7621	14.6814	15.7319	16.4315	15.6958
X39873	0.030673	-1.87665	-0.534717	-0.706702	-1.53368	-0.337514	-0.845859	0.136651	0.922646	0.791755	0.92556	1.23039	0.781306	1.01614	413.286	43.954	C19H36N6O4	False	0.892359	0.000364062	0.0327927	0.892359	(2S)-N-[(1S)-1-{[(2S)-5-carbamimidamido-1-oxopentan-2-yl]-C-hydroxycarbonimidoyl}-2-methylpropyl]-2-[(1-hydroxyethylidene)amino]-4-methylpentanimidic acid	17.5098	16.4835	17.2055	17.113	16.668	17.3116	17.0381	17.5668	17.9897	17.9193	17.9913	18.1553	17.9137	18.04
X63717	-0.249333	-0.519182	-0.738971	-2	-0.721639	-0.0817023	-0.967608	0.101558	0.96748	1.58862	1.36369	0.769936	-0.173063	0.71006	602.308	20.503	C32H39N7O5	False	2.89132	0.000364261	0.0327927	2.89132	CHEMBL256467	14.7678	14.2553	13.8379	11.3483	13.8708	15.0862	13.4037	15.4343	17.0788	18.2585	17.8313	16.7037	14.9127	16.5899
X33969	1.29544	0.890475	0.931003	0.063367	0.599688	0.13902	1.37579	-0.224825	-1.48583	-1.38448	-0.251762	0.113366	-0.319724	-1.74152	367.144	39.359	C24H18N2O2	True	5.92388	0.00036459	0.0327927	-5.92388	3H-Dibenz[f,ij]isoquinoline-2,7-dione, 3-methyl-6-[(4-methylphenyl)amino]-	14.8171	13.2313	13.39	9.9925	12.0927	10.2887	15.1318	8.86398	3.92607	4.32293	8.7585	10.1883	8.49237	2.92482
X9084	0.592641	1.84095	0.0330648	0.968592	1.47479	-0.184912	0.596743	0.315726	-0.65063	-0.792156	-1.43463	-0.982843	-0.866356	-0.910986	174.944	7.232	C2H4N2S3	False	3.11387	0.000364783	0.0327927	-3.11387	2-Sulfanyl-2,5-dihydro-1,2,4-thiadiazole-5-thiol	12.691	15.2474	11.5451	13.4609	14.4975	11.0987	12.6994	12.1239	10.1449	9.85512	8.53942	9.46462	9.70317	9.61177
X22085	-1.06695	-1.12565	-0.700765	-0.315595	-1.33403	-0.988705	-0.0786176	1.0975	1.42915	1.33537	0.902318	0.739863	0.702317	-0.596211	280.226	47.41	C17H29NO2	True	1.09771	0.00036555	0.0327927	1.09771	(3R,5S)-3-methyl-5-((R)-2-((9R,9aS)-octahydro-1H-pyrrolo[1,2-a]azepin-9-yl)propyl)dihydrofuran-2(3H)-one	17.2242	17.184	17.475	17.7387	17.0413	17.2778	17.901	18.7064	18.9335	18.8693	18.5728	18.4615	18.4358	17.5466
X19495	0.2245	1.52836	0.816087	0.971645	1.1131	0.794908	0.0312041	0.271809	-1.12011	-0.941716	-1.82201	-0.896604	-0.886339	-0.0848384	261.22	46.606	C12H29N4P	False	1.39191	0.000365713	0.0327927	-1.39191	P-Aziridin-1-yl-N,N,N',N',N''-pentaethylphosphonimidic diamide	15.7922	16.9513	16.3181	16.4564	16.5821	16.2993	15.6203	15.8342	14.5968	14.7554	13.9728	14.7955	14.8046	15.5171
X36649	-0.661669	-0.258636	-1.16693	0.107087	-1.35592	-1.66829	-0.330915	0.569311	0.344054	1.55556	0.389351	1.20217	1.38549	-0.110653	388.22	22.106	C16H29N5O6	False	2.64973	0.000366451	0.0327929	2.64973	Leu-Gln-Gln	17.7119	18.4124	16.8336	19.0481	16.5051	15.9621	18.2868	19.8516	19.4601	21.566	19.5388	20.9517	21.2703	18.6697
X56697	-0.649946	-0.177213	-1.87456	-0.634034	-0.31016	-0.43487	-1.58093	0.256337	0.835568	0.857531	0.877494	1.36205	0.172159	1.30057	543.782	25.076	C52H75N15O11	False	1.02538	0.000367515	0.0328223	1.02538	w/o MS2:[Val9]-moroidin	13.9516	14.2512	13.1753	13.9616	14.1669	14.0879	13.3614	14.526	14.8932	14.9071	14.9198	15.2269	14.4727	15.1879
X12961	0.0912402	1.95199	0.576702	0.597753	1.29647	0.893939	0.123657	-0.269543	-1.10494	-1.03971	-1.57529	-0.666857	-0.83287	-0.0425313	210.184	46.656	C13H23NO	True	1.24084	0.000368944	0.0328682	-1.24084	(Z)-N-[(6E)-2,4,4,7-tetramethylnona-6,8-dien-3-ylidene]hydroxylamine	17.5693	19.0301	17.9504	17.9669	18.5155	18.1995	17.5947	17.286	16.6301	16.6814	16.2609	16.9741	16.8438	17.4642
X18863	-0.0057519	0.892413	0.71175	0.682256	1.80313	0.729865	0.560759	0.620794	-0.932218	-1.4923	-1.311	-1.14197	-0.513057	-0.604676	257.066	28.19	C8H15N2O4P	False	1.98791	0.000369891	0.0328682	-1.98791	Pyrazoxone	14.616	15.7787	15.5448	15.5067	16.9577	15.5683	15.3494	15.4271	13.4166	12.6915	12.9262	13.145	13.9592	13.8406
X11604	0.4493	0.226944	0.235729	1.72652	1.48803	0.652999	0.692034	0.248519	-0.0293415	-1.30973	-1.01975	-1.10144	-1.0742	-1.18561	198.148	45.512	C11H21NO3	False	1.40931	0.000370242	0.0328682	-1.40931	Ethyl 3-(N-butylacetamido)propionate|C18830	15.6338	15.4333	15.4413	16.7852	16.5702	15.8174	15.8526	15.4528	15.2023	14.048	14.3095	14.2358	14.2604	14.1599
X47309	-0.631745	-0.266349	-0.708251	-0.303628	-1.28469	-1.90643	-0.235146	0.292218	0.705748	1.6462	1.1666	1.08807	0.794028	-0.356625	469.263	21.823	C20H38N4O7	False	2.51827	0.000373686	0.0331004	2.51827	6,14,17,22,25-Pentaoxa-1,3,9,11-tetraazabicyclo[9.8.8]heptacosane-2,10-dione, 3,9-dimethyl-	15.3967	16.0003	15.2704	15.9387	14.3183	13.2913	16.0518	16.9229	17.6059	19.1593	18.3671	18.2374	17.7517	15.8512
X31234	0.477024	1.98735	1.07268	0.47921	0.839566	0.432052	0.173571	-0.0895946	-1.45585	-1.50262	-1.30619	-0.339248	-0.482527	-0.285417	345.166	45.055	C15H24N2O7	False	1.43444	0.000374755	0.0331004	-1.43444	1,9,13-Trioxa-4,18-diazacycloicosane-5,8,14,17-tetrone	15.8175	17.2059	16.365	15.8195	16.1507	15.7761	15.5385	15.2966	14.0406	13.9976	14.1782	15.0671	14.9354	15.1166
X24429	-1.01096	-0.209117	-1.07199	-0.625858	-0.866409	-1.56001	-0.826997	1.25878	0.396181	1.56992	0.982645	0.446613	0.797328	0.719886	297.241	49.35	C16H34O3	True	0.711143	0.000375086	0.0331004	0.711143	1,8,16-trihydroxyhexadecane	18.6548	18.9782	18.6302	18.8101	18.7131	18.4334	18.729	19.5702	19.2223	19.6957	19.4588	19.2427	19.3841	19.3529
X20931	-1.28606	-1.95777	-0.362646	-0.357213	0.0905167	-0.96407	-0.688356	1.27034	0.69652	0.65038	0.666479	-0.129406	1.34099	1.0303	272.257	40.269	C16H33NO2	True	1.24299	0.000376216	0.0331345	1.24299	(2R,3S,4E)-form-2-Amino-4-hexadecene-1,3-diol	17.1703	16.6414	17.8973	17.9016	18.2541	17.4238	17.6409	19.183	18.7312	18.6949	18.7076	18.0809	19.2386	18.994
X40888	-0.490376	-1.13996	-0.860636	-0.685947	-1.61421	-0.590368	0.0225206	-0.414211	1.07129	1.44577	1.31644	1.32332	0.632567	-0.0161901	421.229	20.672	C26H29FN2O2	False	2.08192	0.000380637	0.0334578	2.08192	(3S,4R)-1-[4-cyano-4-(4-fluorophenyl)cyclohexyl]-3-methyl-4-phenylpiperidine-4-carboxylic acid	17.0123	16.129	16.5088	16.7463	15.4842	16.8763	17.7097	17.1158	19.1357	19.6449	19.469	19.4784	18.5392	17.657
X9487	0.242875	1.12632	0.258456	1.06953	1.00899	0.893698	0.979329	0.347787	-0.637648	-0.219366	-1.29875	-1.27767	-1.83077	-0.662776	179.052	33.398	C10H10OS	False	1.12704	0.00038295	0.0334638	-1.12704	2,3-Dihydro-6-methyl-4H-1-benzothiopyran-4-one	15.6349	16.2595	15.6459	16.2194	16.1766	16.0951	16.1556	15.7091	15.0124	15.3081	14.545	14.5599	14.1688	14.9946
X69989	-1.49295	0.123492	-0.941191	0.0987691	-0.209506	-1.16124	-1.80214	0.340678	0.384608	0.683676	0.515026	1.08767	1.52172	0.851381	662.388	25.266	C34H57NO10	False	1.81535	0.000383271	0.0334638	1.81535	Antibiotic M 2847	11.2977	13.205	11.9487	13.1758	12.8121	11.6891	10.9329	13.4613	13.5131	13.866	13.667	14.3427	14.8548	14.0639
X24647	-1.65865	-0.940455	-0.238829	-0.229306	-0.451107	-1.71227	-0.429091	1.71997	1.20844	0.518255	0.576265	0.425614	0.579261	0.631912	299.088	40.614	C10H17ClN4O3	False	1.01321	0.000383371	0.0334638	1.01321	4-[2-(2-Methyl-5-nitro-1H-imidazol-1-yl)ethyl]morpholine--hydrogen chloride (1/1)	11.2105	11.6605	12.1001	12.106	11.9671	11.1769	11.9809	13.3274	13.0069	12.5745	12.6108	12.5164	12.6127	12.6457
X33002	-0.875301	0.131645	-0.107894	-0.329796	-1.14724	-0.742228	-2	0.0863204	0.4879	0.983024	1.21495	1.21237	0.47219	0.870338	359.186	19.585	C21H26O5	False	2.57474	0.000384072	0.0334638	2.57474	Prednisone|C07370	14.1934	15.8968	15.4916	15.1162	13.7334	14.4185	11.8573	15.8201	16.4995	17.337	17.7294	17.725	16.4729	17.1464
X17866	0.762257	1.89494	0.959405	1.28647	0.451156	0.43333	0.13977	-0.803981	-0.672682	-1.11428	-1.4954	-0.908999	-0.513726	-0.418261	249.184	43.672	C14H22N3O	True	0.805526	0.000384534	0.0334638	-0.805526	N-(4-amino-2-methylphenyl)-2-piperidin-1-ium-1-ylacetamide	18.5008	19.0396	18.5946	18.7502	18.3528	18.3444	18.2047	17.7558	17.8183	17.6082	17.427	17.7059	17.8939	17.9393
X11880	0.194736	1.51073	1.41303	1.07064	-0.0429665	0.745978	0.499035	-0.304818	-1.10255	-1.62543	-1.46003	0.195312	-0.621079	-0.472572	200.2	48.382	C12H25NO	True	1.75799	0.00038521	0.0334638	-1.75799	(2R,3S)-clavaminol B	18.1472	19.6492	19.5376	19.1469	17.8759	18.7763	18.4945	17.5771	16.6666	16.0698	16.2586	18.1479	17.2161	17.3856
X36648	-0.799854	-1.70325	0.0979983	-1.20391	-0.677892	-1.00526	-0.0602184	1.40179	1.81739	0.585224	0.588261	0.630548	0.407703	-0.0785249	388.22	21.84	C16H29N5O6	False	2.08936	0.00039001	0.0338148	2.08936	Leu-Gln-Gln	16.462	15.2277	17.6887	15.91	16.6286	16.1814	17.4725	19.47	20.0378	18.3544	18.3585	18.4163	18.1118	17.4475
X21588	0.210894	1.87659	0.650933	0.585247	1.24814	0.50853	0.644039	0.29292	-0.837631	-0.894236	-1.36201	-1.20724	-1.03726	-0.67892	277.176	47.54	C13H28N2S2	True	0.939672	0.000391975	0.0338987	-0.939672	Cyclohexylcarbamodithioic acid--N,N-diethylethanamine (1/1)	16.985	17.942	17.2378	17.2001	17.5809	17.156	17.2339	17.0321	16.3826	16.3501	16.0813	16.1702	16.2679	16.4738
X77773	-0.72003	-0.133565	0.344581	-2	-1.08398	-0.925245	-0.499697	0.592783	1.16778	0.5528	1.3608	0.853459	0.474793	0.286202	770.383	19.785	C36H61NO15	True	4.08201	0.000392757	0.0338987	4.08201	w/o MS2:NCGC00381288-01!2-[2-[19-acetamido-6-(3,4-dicarboxybutanoyloxy)-16,18-dihydroxy-5,9-dimethylicosan-7-yl]oxy-2-oxoethyl]butanedioic acid	12.4694	14.0537	15.3454	8.28038	11.4862	11.915	13.0647	16.016	17.5693	15.9079	18.0907	16.7202	15.6972	15.1877
X8489	0.107281	-0.742268	-1.35373	-1.59387	0.420651	-1.19941	-0.988046	0.0306486	0.807801	1.19919	0.964003	0.179054	1.2691	0.899583	169.058	2.878	C5H10N2O3	True	2.09579	0.000393957	0.0338987	2.09579	2-(2-aminopropanamido)acetic acid	16.6694	15.5044	14.666	14.3367	17.0991	14.8776	15.1674	16.5643	17.6299	18.1666	17.8441	16.7678	18.2625	17.7558
X36395	-0.208612	-0.850289	-0.0653164	-0.254703	-1.48557	-1.56148	-0.986376	-0.0241619	1.48497	0.261049	1.51698	0.617532	1.21348	0.342514	386.289	35.094	C20H37N5O	True	1.59403	0.00039402	0.0338987	1.59403	4-morpholin-4-yl-6-tridecyl-1,3,5-triazin-2-amine	16.3684	15.7069	16.5161	16.3209	15.0521	14.9738	15.5667	16.5585	18.1142	16.8525	18.1472	17.22	17.8343	16.9365
X66570	-0.57401	-0.911876	0.00378063	-1.3951	-1.27036	-1.09765	-0.106081	0.232126	1.28695	1.18744	1.69939	0.94227	0.290382	-0.287254	628.298	21.517	C30H39N9O5	False	2.06321	0.000395218	0.0339362	2.06321	N-Acetylglycyl-D-phenylalanyl-N~5~-(diaminomethylidene)-L-ornithyl-D-tryptophanamide	15.1904	14.7345	15.9701	14.0824	14.2508	14.4838	15.8219	16.2783	17.7017	17.5674	18.2582	17.2366	16.3569	15.5774
X30999	-1.81198	-0.162678	-0.571872	-0.0986219	-1.3648	-0.78469	-0.939448	1.79153	0.725447	0.747575	0.388528	0.590002	0.536714	0.954291	343.244	47.58	C15H30N6O3	True	0.927927	0.000396553	0.0339854	0.927927	N,N'-(1,3-Dimethyl-2-oxoimidazolidine-4,5-diyl)bis(N'-tert-butylurea)	16.8989	17.8331	17.6013	17.8694	17.1522	17.4808	17.3931	18.9399	18.3361	18.3487	18.1453	18.2594	18.2292	18.4657
X36939	-0.101423	-1.77653	-0.478589	-0.638203	-1.93596	-0.38447	-0.200347	0.289475	1.29431	0.913632	0.766558	1.25401	0.569359	0.428166	390.274	44.325	C18H42NO4P	True	1.23019	0.000398674	0.0339881	1.23019	Phosphoric acid--octadecan-1-amine (1/1)	18.4713	17.1637	18.1769	18.0523	17.0392	18.2504	18.3941	18.7765	19.5609	19.2637	19.1489	19.5294	18.995	18.8847
X69130	-0.790343	-1.7856	0.180155	-1.33347	-0.57626	-1.11916	0.142189	0.862831	1.30634	0.53527	1.16265	0.449975	1.19469	-0.229259	653.3	22.362	C29H42N8O8	True	4.33754	0.000398825	0.0339881	4.33754	Boc-Gln-Ala-Arg-7-amido-4-methylcoumarin hydrochloride	16.0166	13.1564	18.8058	14.4557	16.6319	15.0716	18.6967	20.7677	22.0423	19.8263	21.6294	19.5812	21.7214	17.6291
X29883	-0.863121	-0.0308014	-0.462302	-1.09356	-1.85558	-0.784053	-0.320145	0.672509	0.745876	1.26493	1.41833	1.35788	0.305678	-0.355641	335.204	19.995	C20H30O2S	False	1.59225	0.000398873	0.0339881	1.59225	4-(Methylsulfanyl)phenyl 4-hexylcyclohexane-1-carboxylate	18.1994	19.0569	18.6123	17.962	17.177	18.2809	18.7588	19.7814	19.857	20.3917	20.5497	20.4875	19.4035	18.7222
X60660	-0.268701	0.387542	-1.68633	-1.08118	-0.558661	-0.627862	-1.46351	0.238081	-0.197986	0.706305	1.03303	0.884092	1.29337	1.34181	576.641	21.722	C40H81N	False	3.05306	0.000404404	0.0343936	3.05306	N-Octadecyldocos-13-en-1-amine	10.7635	12.0869	7.90462	9.12502	10.1788	10.0392	8.35398	11.7855	10.9061	12.7298	13.3887	13.0883	13.9137	14.0114
X56372	-0.116051	-0.356678	-0.438217	-0.511975	-0.57805	-1.77642	-1.51668	-0.480355	0.233098	0.843483	1.4086	1.06346	0.99813	1.22765	541.345	20.375	C32H48N2O3S	False	3.22265	0.000405494	0.0344207	3.22265	N~1~-{4-[(4-Hydroxyphenyl)sulfanyl]phenyl}-N~2~-octadecylethanediamide	12.3136	11.8009	11.6272	11.4701	11.3293	8.77612	9.32951	11.5374	13.0575	14.3579	15.562	14.8266	14.6874	15.1764
X27291	0.787616	1.49129	1.00553	0.837865	-0.456708	1.09745	0.585021	-0.43696	-0.564896	-0.736814	-1.26132	0.428224	-1.44408	-1.33222	317.148	36.764	C15H22N2O4	False	2.01351	0.000407555	0.0345298	-2.01351	2-(2-amino-3-methylpentanamido)-3-(4-hydroxyphenyl)propanoic acid	14.9534	15.8806	15.2405	15.0196	13.3137	15.3616	14.6864	13.3397	13.1711	12.9446	12.2534	14.4798	12.0126	12.16
X53290	-0.618917	-0.469526	-0.197041	-1.49135	-0.94092	-0.183158	-1.44829	0.277532	1.38834	0.818962	1.48708	0.999253	-0.572728	0.950778	517.256	20.439	C30H38O6	False	1.99118	0.000409069	0.0345924	1.99118	(5R,6R,7R,8S,9R,10R)-7-O-(trans-cinnamoyl)-6 hydroxy-12-oxo-3,13(16)clerodien-15-oic acid methyl ester	14.1809	14.3755	14.7305	13.0442	13.7613	14.7486	13.1003	15.3488	16.796	16.0542	16.9246	16.2891	14.241	16.2259
X21581	0.035549	-0.430652	-0.240988	-1.01923	-1.08188	-1.56233	-1.23879	-0.114889	0.957658	0.557268	1.70148	1.22053	0.928431	0.287841	277.175	19.452	C14H29OPS	False	1.16467	0.00041146	0.0347286	1.16467	1-(Dibutylphosphoryl)cyclohexane-1-thiol	17.0607	16.7175	16.8571	16.2843	16.2382	15.8846	16.1227	16.9499	17.7393	17.4447	18.2868	17.9328	17.7178	17.2463
X41398	-1.18026	-0.124897	-1.2897	-0.270258	0.0877403	-0.471995	-2	0.806126	0.428095	1.48209	0.320935	0.231987	0.71201	1.31681	425.207	20.857	C24H28N2O5	False	2.90699	0.000412253	0.0347298	2.90699	Benazepril|C06843	12.4194	14.4461	12.2092	14.167	14.8545	13.7796	10.7517	16.2341	15.5081	17.5322	15.3023	15.1315	16.0534	17.2148
X28938	-0.0647839	-1.24416	-0.184021	-1.42393	-0.375406	-0.177647	-1.82202	0.377698	1.00206	0.858667	1.5072	0.627766	-0.219842	1.13842	328.892	42.139	C6H10O2S6	False	3.08043	0.000414623	0.0348635	3.08043	Formic acid, tetrathiobis(thio-, O,O-diethyl ester	10.3506	7.94781	10.1077	7.58156	9.71775	10.1207	6.77052	11.2521	12.5241	12.232	13.5532	11.7615	10.0347	12.8019
X11946	1.6505	1.44989	0.298578	-0.0452721	1.58583	-0.261208	0.590723	-1.00076	-1.20238	-1.26774	-0.434491	-0.869007	-0.125439	-0.369223	201.065	29.855	C7H15O3P	False	4.28773	0.000422631	0.0352755	-4.28773	1,3,2-Dioxaphosphorinane, 2-ethoxy-5,5-dimethyl-	17.0398	16.4684	13.1893	12.2099	16.8556	11.5949	14.0213	9.48856	8.91432	8.72815	11.1014	9.86381	11.9816	11.2873
X30131	1.42205	0.876247	1.56305	0.571234	1.16758	0.00485081	-0.215049	-0.0284464	-0.178517	-0.929319	-1.36205	-0.777339	-1.52626	-0.588048	337.161	47.12	C14H28N2O3S2	False	1.61188	0.000424359	0.0352755	-1.61188	2,6-Diamino-2,3,4,6-tetradeoxy-erythro-hexose,9CI,8CI-Di-Et-dithioacetal, 2,6-di-N-Ac	15.5722	15.0009	15.7197	14.6816	15.3058	14.0888	13.8586	14.054	13.8969	13.111	12.6581	13.2701	12.4862	13.4682
X40442	-0.610744	-0.247782	0.339714	-0.775376	-1.76832	-1.6756	-0.614643	0.152633	0.658594	0.866647	1.38149	1.42777	0.374582	0.49104	418.222	19.146	C23H31NO6	False	1.86757	0.000424562	0.0352755	1.86757	Myxopyronin A	16.5692	17.0124	17.7298	16.3681	15.1556	15.2688	16.5644	17.5014	18.1192	18.3733	19.002	19.0585	17.7724	17.9146
X20769	0.842474	1.22641	0.00109013	0.524846	1.53965	0.529054	0.688889	-0.13691	-0.214997	0.0360628	-1.9049	-1.31936	-0.513823	-1.29848	271.225	36.861	C17H30N	False	1.87032	0.000424606	0.0352755	-1.87032	Laurylpyridinium	16.5073	16.9769	15.4783	16.1189	17.36	16.124	16.3195	15.3095	15.214	15.5211	13.1472	13.8634	14.8485	13.8889
X34161	0.195279	1.67044	0.258533	1.0683	1.57192	-0.183248	0.706209	0.296504	-1.13683	-0.89567	-1.32084	-1.24136	-0.531502	-0.457734	368.299	44.362	C22H41NOS	False	3.00593	0.000425751	0.0352755	-3.00593	N-[3-(Methylsulfanyl)propyl]octadeca-9,12-dienamide	13.6045	16.5397	13.7303	15.3416	16.3436	12.8513	14.6211	13.8059	10.9539	11.4337	10.5877	10.7459	12.1583	12.3051
X42017	-0.69971	-0.815892	-0.567583	-1.23769	-1.36427	-0.73099	0.0779506	0.334316	0.890784	1.58152	1.46727	1.34178	0.17014	-0.447627	429.25	20.123	C23H32N4O4	False	2.00141	0.000425858	0.0352755	2.00141	Nummularine F|C10011	15.5717	15.4192	15.7451	14.8657	14.6996	15.5306	16.5922	16.9286	17.6588	18.5652	18.4153	18.2506	16.7131	15.9025
X15494	-0.212126	-1.04279	-0.256843	-0.21335	-1.80235	-1.29892	-0.790263	0.662825	1.32648	0.176957	1.06385	0.0639372	1.41879	0.903808	231.112	35.749	C8H15ClN6	True	1.0276	0.000426763	0.0352755	1.0276	(4Z)-4-[Amino(piperidin-1-yl)methylidene]-4H-1,2,3-triazol-5-amine--hydrogen chloride (1/1)	18.6537	18.1217	18.625	18.6529	17.6354	17.9577	18.2835	19.2139	19.6389	18.9028	19.4707	18.8304	19.698	19.3682
X73998	-0.188656	-0.686295	-2	-0.663759	-1.51772	-0.0739024	-0.0754634	0.946568	1.21235	1.43808	0.804906	0.571296	0.137251	0.165127	710.365	21.405	C36H53N3O10	False	3.53233	0.000427321	0.0352755	3.53233	lajollamycin	11.9591	10.7929	7.5507	10.8457	8.84444	12.228	12.2243	14.6194	15.2423	15.7713	14.2874	13.74	12.7228	12.7881
X32847	-1.28699	0.202052	0.0306421	-2	-0.418877	-0.476951	-0.967042	0.919636	0.892678	0.66407	1.0949	0.62868	0.284187	0.794111	358.174	20.242	C18H32BrNO	False	3.37528	0.00042741	0.0352755	3.37528	3-(Dodecyloxy)-1-methylpyridin-1-ium bromide	10.3507	13.6834	13.2998	7.94673	12.2937	12.1637	11.0668	15.2895	15.2291	14.7175	15.6817	14.6383	13.8672	15.0085
X63277	-1.56726	-0.906249	0.201374	-0.638899	-0.553519	-0.54611	-1.65826	0.855756	1.26277	1.05475	0.466283	1.0746	-0.0934976	1.04827	598.353	24.419	C27H47N7O8	False	0.967907	0.000427438	0.0352755	0.967907	L-Glutamine, L-alanyl-L-valyl-L-prolyl-L-isoleucyl-L-alanyl-	13.8073	14.2023	14.8642	14.362	14.4131	14.4175	13.7529	15.2552	15.4984	15.3741	15.0225	15.386	14.688	15.3703
X36524	-1.03101	-1.004	-1.20138	-0.307316	-1.72993	0.562517	-0.670069	0.515191	0.96371	1.32721	0.899048	1.31216	-0.0196403	0.383511	387.227	20.944	C18H37O5P	False	1.64634	0.000428838	0.0353108	1.64634	2-diethoxyphosphorylethyl dodecanoate	17.7895	17.8184	17.6071	18.5644	17.0411	19.4958	18.176	19.4452	19.9254	20.3147	19.8562	20.2986	18.8725	19.3042
X68640	-1.15866	-1.12787	0.0880972	-1.38424	-1.05733	-1.23949	0.35618	0.294374	1.27891	1.22534	1.27552	0.755055	0.44382	0.250273	648.331	20.692	C28H47N7O9	False	1.17069	0.00042945	0.0353108	1.17069	cyclo(Pro1-Gly2-Leu3-Ser4-Ala5-Val6-Thr7-)	14.7203	14.7432	15.6452	14.553	14.7955	14.6604	15.8441	15.7983	16.5286	16.4889	16.5261	16.14	15.9091	15.7655
X46993	0.261668	-1.20332	-0.441126	-0.955443	-0.659697	-0.631582	-1.64131	-0.649611	1.06608	0.797656	1.1463	1.15716	0.395273	1.35796	467.215	20.159	C22H26N8O4	False	3.47598	0.000437454	0.0358845	3.47598	1,3-Benzenediamine, 4,4'-[1,3-phenylenebis(azo)]bis-, diacetate	13.6894	10.3079	12.0672	10.8801	11.5627	11.6276	9.29698	11.586	15.5461	14.9265	15.7312	15.7563	13.9978	16.2198
X31868	-0.818033	-1.26537	-0.0954184	-1.56653	-1.12822	-0.380386	-0.152022	0.690316	1.38981	0.964691	1.5764	0.990335	-0.0934349	-0.112137	350.209	19.996	C20H29O5	False	1.4937	0.000438038	0.0358845	1.4937	PUBCHEM_53438734	17.2413	16.8087	17.9401	16.5174	16.9413	17.6645	17.8854	18.7	19.3764	18.9653	19.5569	18.9901	17.942	17.9239
X68553	-0.0278433	0.0633205	-1.35953	-0.932283	-0.737582	-1.87001	-0.449169	-0.0907139	0.0865972	1.31645	1.44801	0.895159	0.743873	0.913715	647.353	20.69	C33H48N6O6	False	2.22406	0.000438983	0.0358959	2.22406	L-Phenylalanine, L-alanyl-L-lysyl-L-isoleucyl-L-phenylalanyl-	15.174	15.3076	13.2229	13.8489	14.1341	12.475	14.5567	15.0819	15.3417	17.1435	17.3363	16.5263	16.3046	16.5535
X62585	-1.37626	-1.09297	0.0993682	-1.04533	-0.394072	-1.06886	-0.393717	0.112311	1.40425	0.877163	1.41594	0.82882	1.24124	-0.607874	592.634	21.234	C40H81NO	False	3.33045	0.00044034	0.0359409	3.33045	N-Octadecyldocosanamide	12.2973	12.9237	15.5601	13.029	14.469	12.977	14.4698	15.5887	18.4453	17.2799	18.4712	17.173	18.0849	13.9963
X24825	0.319409	-0.444502	-0.608901	-1.13388	-0.779595	-1.86508	-0.750881	-0.536069	0.802937	1.04273	1.49152	0.917035	1.01237	0.532911	300.149	20.825	C15H24O4P	False	3.60736	0.000447004	0.0364181	3.60736	2-Ethylhexyl [hydroxy(phenyl)methyl]phosphonate	13.7871	11.9547	11.5603	10.301	11.1509	8.54703	11.2197	11.735	14.947	15.5222	16.5987	15.2207	15.4494	14.2992
X53844	-0.163393	0.526734	1.1875	1.69234	0.245984	1.46099	0.343261	-1.36658	0.0295877	-1.01059	-1.41611	-0.190363	-0.295115	-1.04425	521.306	19.912	C24H41NO10	False	2.45184	0.000450837	0.0364372	-2.45184	Mycalamide A|C17008	11.3924	12.5112	13.5824	14.4008	12.0561	14.0258	12.2138	9.44187	11.7053	10.019	9.36157	11.3487	11.1789	9.96441
X54998	0.402379	0.315403	0.55131	0.717259	0.589276	0.600293	2	-0.332118	-0.724449	-0.663506	-2	-0.735967	-0.31343	-0.641875	530.292	20.697	C27H45O8S	False	1.39633	0.00045359	0.0364372	-1.39633	(22E)-5alpha-Cholest-22-ene-3beta,6beta,8,15alpha,24-pentol,15-sulphate	14.4217	14.3433	14.556	14.7055	14.5902	14.6001	16.0834	13.7596	13.406	13.4609	12.2468	13.3956	13.7765	13.4804
X53065	-0.560878	-0.500553	-1.34551	-0.5559	-1.19115	-0.059779	-1.09962	0.712284	0.834222	1.6859	0.460878	1.17943	-0.76399	1.20465	515.217	20.158	C22H34N4O8S	False	2.10308	0.000454015	0.0364372	2.10308	Cytosaminomycin A	14.4976	14.5812	13.4106	14.5045	13.6245	15.1918	13.7513	16.2613	16.4303	17.6101	15.9131	16.9085	14.2162	16.9434
X59891	-1.68884	0.564393	-0.293322	-1.1193	-0.505048	-1.00465	-1.21325	0.627547	-0.268882	0.479667	1.26646	0.812429	1.32874	1.01405	570.266	21.855	C27H35N7O7	False	3.55244	0.000454852	0.0364372	3.55244	Acetaminophen mixture with butalbital and caffeine	9.09583	14.422	12.3945	10.4421	11.8941	10.7131	10.22	14.5713	12.4523	14.2217	16.0815	15.0083	16.2288	15.4849
X65455	-0.443627	-0.409501	-1.10822	-1.37652	-0.944469	-1.32349	0.297873	-0.00875454	0.963336	1.7448	1.23102	0.981413	0.552125	-0.155996	618.334	20.389	C26H45N9O7	False	2.16184	0.000455833	0.0364372	2.16184	GGVHVK	14.4417	14.4903	13.4943	13.1119	13.7278	13.1875	15.4987	15.0616	16.4473	17.5613	16.8289	16.4731	15.8611	14.8517
X39114	-0.0694844	-2	-0.452916	-0.74715	-1.47458	-0.414088	-0.135708	0.331116	1.28847	0.883147	0.893418	1.14701	0.584032	0.344803	407.301	44.325	C21H42O7	True	1.24589	0.000456072	0.0364372	1.24589	9-(1,4,7,10,13,16-Hexaoxacyclooctadecan-2-yl)nonan-1-ol	19.142	17.4617	18.8365	18.602	18.0223	18.8674	19.0893	19.4613	20.2242	19.9012	19.9094	20.1114	19.6628	19.4722
X44269	-0.99362	-1.0774	-0.485565	-0.409014	-0.92899	-1.73048	0.30691	0.764593	1.12125	1.29208	0.60514	1.01889	1.10905	-0.592853	446.248	19.443	C32H31NO	False	2.03056	0.00045625	0.0364372	2.03056	(2S)-2-(Dibenzylamino)-1,6-diphenylhex-4-en-3-one	16.453	16.3411	17.132	17.2343	16.5394	15.4683	18.191	18.8027	19.2793	19.5076	18.5896	19.1425	19.263	16.9886
X27607	0.307298	0.790475	1.18973	1.44723	0.944094	0.589172	0.0017418	0.343323	-0.462075	-1.45101	-1.47723	-0.813265	-1.49803	0.0885513	319.128	32.54	C15H16N6O	False	3.02001	0.000456896	0.0364372	-3.02001	Amicarbalide	14.3332	15.3024	16.1032	16.6197	15.6105	14.8986	13.7203	14.4055	12.79	10.8064	10.7538	12.0856	10.7121	13.8945
X81973	0.411901	-1.28859	-1.81149	-0.28138	-1.02483	0.124076	-1.3841	0.0302001	0.871004	0.770847	0.574972	0.848745	0.863466	1.29518	902.461	26.127	C43H59N13O9	False	3.85568	0.000457393	0.0364372	3.85568	L-Lysyl-N~5~-(diaminomethylidene)-L-ornithyl-L-tryptophyl-L-phenylalanyl-L-histidyl-L-glutamic acid	11.7047	7.33732	5.99436	9.92414	8.01475	10.9655	7.09203	10.7244	12.8838	12.6266	12.1235	12.8266	12.8644	13.9732
X32234	-0.592887	-1.33819	-1.18883	-0.116125	-1.7967	-0.459476	-0.129021	0.758322	0.8727	1.58796	0.395342	1.2838	0.521019	0.202085	353.267	45.93	C20H34N4	True	0.997439	0.000457443	0.0364372	0.997439	1,1'-(Hexane-1,6-diyldiazanediyl)di(cyclohexane-1-carbonitrile)	19.2813	18.8185	18.9112	19.5774	18.5337	19.3642	19.5694	20.1205	20.1915	20.6357	19.8951	20.4468	19.9731	19.775
X35255	-0.972611	0.111711	0.29836	-1.19024	-1.63905	-0.814796	-1.18188	0.673685	0.388761	0.0323754	1.22863	1.14722	0.450042	1.46779	377.197	20.23	C22H24N4O2	False	1.52051	0.000457511	0.0364372	1.52051	(1R,11S,13S,18R,19R)-21-hydroxy-10,10-dimethyl-22-oxa-8,17,20-triazahexacyclo[17.3.1.0^{1,9}.0^{2,7}.0^{11,19}.0^{13,17}]tricosa-2,4,6,8,20-pentaene-18-carbonitrile	17.4241	18.495	18.6793	17.2092	16.7659	17.58	17.2174	19.05	18.7686	18.4166	19.5981	19.5177	18.8291	19.8343
X57906	0.640405	-0.612237	-1.91155	-0.639413	-1.57142	-0.533284	-0.640232	0.446447	0.604667	0.893512	0.848593	0.160185	0.839806	1.47452	554.271	35.376	C29H41NO8	False	3.0736	0.000458115	0.0364372	3.0736	Stephanthraniline C	13.6253	11.0672	8.41376	11.0117	9.10836	11.2284	11.01	13.2292	13.5523	14.1422	14.0504	12.6446	14.0325	15.3287
X56631	-0.941011	0.00816073	-0.969191	-1.68943	0.158608	-1.63142	-0.241628	1.14048	0.923807	1.48073	0.983694	0.063714	0.31857	0.394915	543.308	21.262	C33H44O5	False	2.16833	0.000458671	0.0364372	2.16833	quaesitol	13.5354	14.8931	13.4951	12.4649	15.1082	12.5479	14.5358	16.5126	16.2027	16.9993	16.2884	14.9725	15.337	15.4462
X32895	-1.48845	-1.09627	-0.0163702	0.571619	-1.65936	-0.727226	-0.917862	1.41675	0.5404	0.624969	0.0902804	0.720348	1.093	0.848166	358.257	33.52	C19H35NO5	True	1.86017	0.000458684	0.0364372	1.86017	(1alpha,2beta,5alpha)-5-Methyl-2-(1-methylethyl)cyclohexyl (R)-N-(2,4-dihydroxy-3,3-dimethyl-1-oxobutyl)-beta-alaninate	18.0173	18.496	19.8141	20.5318	17.8087	18.9464	18.7137	21.5634	20.4937	20.5969	19.9443	20.7133	21.1682	20.8694
X63715	-0.644777	0.540166	-1.40915	-1.20771	-0.864108	-1.24366	-0.446919	0.108461	-0.176338	1.44511	1.35176	1.10654	0.979649	0.460968	602.308	20.606	C32H39N7O5	False	2.75462	0.000459663	0.0364499	2.75462	CHEMBL256467	13.8553	16.0206	12.4586	12.8267	13.4545	12.761	14.2169	15.2317	14.7113	17.6742	17.5036	17.0555	16.8236	15.8759
X41732	-1.00497	-0.0613528	-0.978724	-0.215434	-1.67062	-1.11688	-0.243054	0.792049	0.571134	1.74994	0.644346	1.49947	0.336797	-0.302698	427.241	19.956	C26H35O3P	False	2.38775	0.000461139	0.036502	2.38775	[(2,4,4-Trimethylpentyl)phosphoryl]bis[(2,6-dimethylphenyl)methanone]	15.6548	17.1452	15.6962	16.9018	14.6034	15.478	16.8582	18.4931	18.1442	20.0061	18.2598	19.6105	17.7741	16.764
X57125	0.385589	-0.0747172	1.07125	0.289919	1.41266	1.50083	0.781901	0.201881	-0.789485	-0.668159	-1.83793	-1.26678	-0.781387	-0.225571	547.341	32.102	C33H48O5	False	1.6068	0.000464397	0.0366948	-1.6068	15alpha-acetoxy-3-oxo-24-methylenelanosta-7,9(11)-dien-21-oic acid	15.9262	15.4439	16.6447	15.826	17.0024	17.0947	16.3415	15.7338	14.695	14.8222	13.5965	14.1949	14.7035	15.2859
X50908	-0.176567	-0.548785	-0.253424	-0.619505	-0.75882	-1.06651	-1.85206	-0.583419	0.16348	1.1681	1.40899	0.983963	1.30512	0.829439	498.27	21.854	C25H39NO9	False	2.68395	0.000465254	0.0366974	2.68395	(17RS)-17-(beta-D-glucopyranosyloxy)antidesmone	14.7667	14.1039	14.6298	13.978	13.7299	13.1821	11.7833	14.0423	15.3722	17.161	17.5899	16.8331	17.405	16.558
X60129	-0.607336	0.142633	-2	-0.213248	-0.384828	-0.882138	-1.00937	0.442359	-0.0011329	1.14809	1.00526	0.819177	1.19237	0.697053	571.823	21.354	C11H12I3NO2	False	2.14975	0.000466151	0.0367032	2.14975	w/o MS2:MLS002154127-01!Iopanoic acid96-83-3	13.522	14.5861	11.0511	14.0812	13.8377	13.1322	12.9516	15.0114	14.3821	16.0126	15.81	15.546	16.0755	15.3727
X34015	1.31557	1.96677	-0.0279311	0.88766	0.792745	0.192022	0.117382	-0.30046	-0.378988	-0.183743	-1.67795	-0.872097	-1.37007	-0.460919	367.268	34.087	C22H40P2	False	4.31911	0.000467537	0.0367474	-4.31911	Phosphine, 1,2-ethanediylbis[dicyclopentyl-	15.0069	16.884	11.1341	13.7734	13.4998	11.7682	11.553	10.3486	10.1222	10.685	6.37785	8.70077	7.26533	9.88603
X33384	0.7489	0.101792	1.80811	1.0018	-0.089006	1.42214	0.524982	-1.15169	-1.0209	-1.00594	-1.47708	-0.17608	-0.444997	-0.242026	362.191	19.683	C14H25N7O3	False	1.13172	0.000470109	0.0368615	-1.13172	Bursopoietin	16.0505	15.5861	16.8108	16.2321	15.4491	16.5338	15.8898	14.6864	14.7803	14.791	14.4529	15.3866	15.1936	15.3393
X67211	-0.108305	-1.28627	-1.1656	-1.06991	0.510815	-0.839994	-1.30064	-0.46584	0.745883	1.25006	1.06245	0.556513	1.34695	0.763876	635	21.784	C30H19Cl3O8	False	3.12203	0.000470643	0.0368615	3.12203	1,3,8,1',3',8'-Hexahydroxy-2,2',4'-trichlor-6,6'-dimethyl-bisanthronyl-(10,10') (Flavoobscurin A)	13.5261	11.079	11.3296	11.5284	14.8123	12.0061	11.0491	12.7833	15.3006	16.348	15.9583	14.9072	16.5493	15.338
X37804	0.109033	-1.35434	-0.313934	-1.26316	-0.861908	-1.10419	-0.491245	-0.528852	0.699439	1.60044	1.4491	1.1987	0.526935	0.333977	397.194	23.916	C15H24N8O5	False	2.4526	0.000476059	0.0372203	2.4526	N-{3-[(1R,3E,4R,6R,9R)-6-hydroxy-9-(2-hydroxy-4-imino-1,4-dihydropyrimidin-1-yl)-3-(hydroxyimino)-2,8-dioxa-5-azabicyclo[4.3.1]decan-4-yl]propyl}guanidine	14.7542	12.375	14.0665	12.5232	13.1756	12.7817	13.7782	13.7171	15.7141	17.179	16.933	16.5258	15.4336	15.1199
X79361	-0.0513447	0.141522	-0.533966	-1.82116	-0.41561	-0.901334	-1.66425	-0.324314	0.631967	0.641538	1.15401	0.824652	1.1064	1.21189	807.748	22.531	C51H98O6	False	3.51616	0.000482321	0.0376302	3.51616	1,3-bis(hexadecanoyloxy)propan-2-yl hexadecanoate	10.5565	11.0089	9.42435	6.40481	9.70199	8.56256	6.77289	9.91616	12.1594	12.1819	13.3841	12.6114	13.2724	13.5198
X39388	0.189683	0.634868	0.0163672	0.548655	1.40809	1.46735	1.20703	0.0764021	-0.382547	-0.212667	-0.985829	-0.979279	-1.30148	-1.68665	409.312	47.336	C25H44O2S	False	1.2085	0.000483199	0.0376302	-1.2085	1-Methyl-4-(octadecane-1-sulfonyl)benzene	15.1139	15.4581	14.98	15.3914	16.0557	16.1016	15.9003	15.0264	14.6716	14.8029	14.2053	14.2104	13.9613	13.6636
X1847	1.67659	1.54292	0.853693	-0.0395037	0.74946	0.152921	0.297467	-1.45634	-1.00522	-1.599	0.0102119	-0.0807006	-0.777038	-0.325464	88.0871	18.57	C3H6N2	False	4.42756	0.000486467	0.0376302	-4.42756	3-Aminopropiononitrile|C05670	18.4942	18.0983	16.0576	13.4128	15.7489	13.9826	14.4106	9.21759	10.5533	8.79518	13.56	13.2908	11.229	12.5661
X68757	0.309768	-0.363806	-1.47001	-1.04175	-0.513189	-0.79984	-1.37732	-0.159163	-0.303324	1.15031	1.10861	0.995365	1.35175	1.11259	649.013	21.735	C27H30O16	False	2.94282	0.000486626	0.0376302	2.94282	w/o MS2:RUTOSIDE (rutin)	11.8945	10.5746	8.40685	9.24606	10.2818	9.7201	8.58849	10.9756	10.6931	13.5416	13.4599	13.238	13.9363	13.4677
X58720	-0.744661	-0.318627	-0.315568	0.174934	-1.97079	-0.994013	-1.21802	0.43827	0.796429	1.29381	0.898818	1.03827	1.18434	-0.263196	560.333	38.493	C30H45N3O7	True	1.456	0.000487084	0.0376302	1.456	12-Oxa-2,6,10-triazatetradecanoic acid, 4,8-dihydroxy-3-((4-hydroxyphenyl)methyl)-13,13-dimethyl-11-oxo-9-(phenylmethyl)-, 1,1-dimethylethyl ester, (3S-(3R*,4S*,8S*,9R*))-	18.2503	18.6533	18.6562	19.1202	17.0903	18.0144	17.8025	19.3694	19.7082	20.1787	19.8051	19.937	20.0752	18.7058
X52529	-0.0703018	-0.479362	-1.34068	-0.994352	-0.766675	-1.03826	-0.548046	-0.754598	0.756296	1.48261	1.28291	1.11056	1.33935	0.0205545	510.931	20.336	C12H24O4S8	False	3.88815	0.000488779	0.0376302	3.88815	neogymnorrhizol	12.7511	11.6883	9.45045	10.3503	10.9418	10.2362	11.5099	10.9732	14.8988	16.7859	16.267	15.8193	16.4137	12.9872
X33148	0.535132	1.8733	0.630671	1.32277	-0.421709	0.316275	1.04053	0.144108	-1.18581	-0.528661	-1.12296	-0.342274	-0.965086	-1.29629	360.248	42.39	C16H31N7O	False	2.06967	0.00048938	0.0376302	-2.06967	N-(4,6-Diamino-1,3,5-triazin-2-yl)-N'-dodecylurea	13.3112	15.1412	13.4418	14.3883	12.0027	13.0119	14.0023	12.7764	10.9577	11.8564	11.0437	12.1113	11.2596	10.8066
X37951	-1.65802	-1.78563	0.0649069	-0.636148	-0.690844	-0.394228	-0.55245	1.21255	0.93614	0.430941	1.49329	0.268837	0.760842	0.549806	398.238	29.36	C16H33N5O5	False	0.942236	0.000491172	0.0376302	0.942236	Antibiotic KA 6606 XVII	17.3193	17.2448	18.3245	17.9155	17.8835	18.0566	17.9643	18.9941	18.8328	18.538	19.1579	18.4435	18.7305	18.6074
X74744	-0.982236	-0.997596	-1.22314	-0.430903	-0.934602	0.635929	-1.28712	1.16625	0.76853	1.13562	0.767904	0.819134	-0.658194	1.22042	721.361	20.141	C32H58O16	True	7.46187	0.000491193	0.0376302	7.46187	cuscutic acid A2	6.30839	6.23154	5.10305	9.06698	6.54673	14.4049	4.78291	17.0583	15.0683	16.9051	15.0652	15.3215	7.92973	17.3294
X70858	-1.37856	-0.107808	-0.340719	-0.414519	-0.385853	-1.01051	-1.7063	0.605151	-0.553295	0.652144	0.933482	0.90187	1.36782	1.43709	672.343	21.244	C34H49N5O7S	True	1.65465	0.000491455	0.0376302	1.65465	(2S,5S,8S,11S,14S,15R)-4,17-dihydroxy-8-[(4-hydroxyphenyl)methyl]-2,6,9,14-tetramethyl-5,11-bis(propan-2-yl)-15-propyl-12-oxa-20-thia-3,6,9,16,21-pentaazabicyclo[16.2.1]henicosa-1(21),3,16,18-tetraene-7,10,13-trione	13.561	14.938	14.6856	14.6056	14.6367	13.9598	13.2058	15.7106	14.4553	15.7615	16.0664	16.0321	16.5371	16.6121
X44754	-0.962744	-1.30308	0.301414	-0.988089	-1.48177	0.262374	-1.12127	0.786191	1.53929	0.728382	1.17564	0.787605	-0.199329	0.475391	450.268	20.234	C19H41NO9	False	2.10293	0.000491592	0.0376302	2.10293	2,5,8,11,14,17,20,23,26-Nonaoxaoctacosan-28-amine	18.5304	18.0572	20.2883	18.4952	17.8087	20.234	18.31	20.9624	22.0096	20.882	21.5039	20.9643	19.592	20.5302
X73837	-1.08638	-0.566051	0.754757	-1.07747	-0.443104	-1.12093	-1.73345	0.298534	0.620928	-0.0192427	1.28652	0.976786	1.09095	1.01815	708.365	19.883	C34H50N4O9S	True	2.42967	0.000491872	0.0376302	2.42967	Dalfopristin|C08033	11.7137	12.5529	14.6832	11.7281	12.7512	11.658	10.6701	13.9474	14.4673	13.4348	15.5408	15.0413	15.2254	15.108
X37939	-0.621926	-0.746892	-0.756089	-1.50991	-0.962695	0.29964	-1.02743	0.301711	0.812858	1.8221	1.18782	0.912538	-0.478224	0.766496	398.205	21.045	C16H32ClN3O6	False	1.78119	0.000492279	0.0376302	1.78119	Butanamide, 4-amino-N-(2-oxo-2-(1,4,7,10-tetraoxa-13-azacyclopentadec-13-yl)ethyl)-, monohydrochloride	14.9471	14.8009	14.7901	13.9076	14.5482	16.026	14.4724	16.0284	16.6268	17.8083	17.0658	16.7435	15.1154	16.5725
X23720	1.77643	1.35709	0.138259	-0.0332321	1.47095	0.560955	-0.0200398	-1.2975	-0.807972	-1.09918	-0.344164	-0.478129	-1.26885	0.0453803	292.26	44.344	C17H35NO	True	2.99901	0.000494888	0.0377608	-2.99901	Oxime-Heptadecanal	18.564	17.7257	15.289	14.9462	17.9533	16.1341	14.9726	12.4187	13.3974	12.8152	14.3246	14.0568	12.476	15.1034
X56013	0.0607843	-0.00295205	-0.277087	-0.559206	-2	-1.17426	-1.32109	0.15318	0.675506	1.10728	1.32091	0.935074	0.827571	0.341435	538.349	40.175	C31H49NO5	True	1.55051	0.000495682	0.0377608	1.55051	Ambruticin VS-1	21.6253	21.5608	21.2833	20.9977	19.451	20.3751	20.2265	21.7189	22.2476	22.6847	22.9009	22.5103	22.4015	21.9094
X60662	-0.139481	0.302117	-1.61632	-1.05575	-0.628792	-0.725174	-1.3747	0.159109	-0.373241	0.78537	1.06295	0.93001	1.33454	1.33937	576.642	21.802	C40H81N	False	3.51833	0.000498106	0.0378807	3.51833	N-Octadecyldocos-13-en-1-amine	11.0869	12.125	7.61498	8.9328	9.93654	9.70996	8.183	11.7888	10.5373	13.2611	13.9136	13.6011	14.5521	14.5635
X10892	0.53997	-0.375825	-1.95219	-0.580671	-1.46531	-0.594506	-0.815933	0.535981	0.27506	1.75176	0.599772	0.785506	0.603301	0.693074	192.024	6.911	C7H10ClNOS	False	3.15465	0.000499228	0.0379013	3.15465	Ethyl thiophene-3-carboximidate--hydrogen chloride (1/1)	12.1913	10.2632	6.94446	9.83194	7.9695	9.80282	9.33664	12.1829	11.6335	14.7425	12.3172	12.7082	12.3246	12.5136
X66565	-0.494952	-1.05252	0.342681	-2	-0.202083	-0.874766	-0.87677	0.731738	1.47421	0.72101	1.37094	0.165642	0.173923	0.619786	628.297	21.451	C30H39N9O5	False	2.68556	0.000500582	0.0379395	2.68556	N-Acetylglycyl-D-phenylalanyl-N~5~-(diaminomethylidene)-L-ornithyl-D-tryptophanamide	15.0361	14.0392	16.5337	12.1685	15.5597	14.357	14.3535	17.2293	18.5568	17.2101	18.3722	16.2172	16.232	17.0292
X41858	-0.191752	-1.37075	-1.48227	-0.633186	0.206429	-1.5413	-0.209068	-0.0771725	0.639754	1.43151	1.52391	0.845433	0.706983	0.15149	428.203	26.795	C19H29N3O8	True	4.65612	0.000506408	0.0383159	4.65612	1(2H)-Pyrimidineethanamine, tetrahydro-3-(1-methylethyl)-N-phenyl-, ethanedioate, hydrate (2:4:1)	13.2482	9.5688	9.22077	11.8706	14.4908	9.03653	13.1942	13.6058	15.8431	18.314	18.6024	16.485	16.0529	14.3194
X28495	-0.330667	-0.787236	-0.378302	-1.13717	-1.13171	-0.45083	-1.12842	-0.214095	1.03304	1.49859	1.73834	1.10905	-0.384967	0.564382	325.684	19.824	C20H36O3	False	1.5893	0.000512914	0.0387424	1.5893	w/o MS2:(3S)-5-[(1R,2R,8aS)-2-hydroxy-2,5,5,8a-tetramethyl-3,4,4a,6,7,8-hexahydro-1H-naphthalen-1-yl]-3-methylpentanoic acid	15.5563	15.0811	15.5067	14.7168	14.7225	15.4312	14.726	15.6776	16.9757	17.4602	17.7098	17.0548	15.4998	16.4879
X70860	0.252932	-0.835924	-0.812222	-0.795515	-0.606601	-0.786072	-1.70604	-0.700355	0.398911	1.30239	1.12971	0.81683	1.07989	1.26206	672.356	21.788	C37H53NO8S	False	1.99244	0.000517066	0.03899	1.99244	Polymastiamide C	15.8528	14.4173	14.4485	14.4706	14.7196	14.483	13.2701	14.596	16.0453	17.2364	17.0088	16.5963	16.9431	17.1833
X42417	0.0711753	1.43396	0.581523	1.07445	1.13815	0.0944072	0.881407	0.116493	-1.13305	-1.27661	-1.75157	-0.788553	0.349378	-0.791167	432.237	42.39	C23H31N5O2	True	2.16007	0.000518796	0.0390543	-2.16007	BBR 2862	15.6181	17.5713	16.3495	17.056	17.1473	15.6514	16.7793	15.6831	13.8922	13.6865	13.0058	14.3859	16.0168	14.3822
X8425	0.337268	1.82889	0.462469	0.129952	0.88753	0.634686	1.00177	0.356841	-1.57775	-1.57976	-0.854344	-0.219849	-0.360893	-1.04681	168.065	31.614	C8H9NO3	True	2.00861	0.000527952	0.0395222	-2.00861	5-hydroxy-2,3,3a,4,5,7a-hexahydro-1H-isoindole-1,3-dione	15.1351	17.1202	15.3018	14.8592	15.8674	15.5309	16.0195	15.1612	12.5866	12.5839	13.5493	14.3937	14.206	13.2932
X17028	0.873433	0.455456	1.62242	-0.0928892	1.40001	1.32909	0.181147	-0.971396	-0.41863	-1.2489	-0.925087	-1.291	-0.382705	-0.530958	243.158	39.542	C12H20N4	False	0.83493	0.000528149	0.0395222	-0.83493	Piperidine, 1-(2-((3-amino-4-pyridyl)amino)ethyl)-	17.7455	17.5338	18.1249	17.256	18.0123	17.9764	17.3948	16.811	17.091	16.6704	16.8344	16.6491	17.1092	17.0341
X69538	0.234429	-0.479567	-0.652432	-0.914774	-1.23045	-0.489378	-1.75418	-0.540668	0.534805	1.32618	1.27326	0.970368	0.515721	1.20668	657.323	20.442	C32H44N6O9	False	1.96381	0.000528626	0.0395222	1.96381	Enkephalin-leu, ala(2)-ser(6)-	17.0279	16.0995	15.8748	15.5337	15.1232	16.0868	14.4423	16.0201	17.4184	18.4474	18.3786	17.9847	17.3936	18.292
X55246	0.599459	0.273745	1.03746	1.13127	0.0284969	1.11031	1.16771	-0.994252	-0.337284	-2	-0.856201	0.311947	-0.487575	-0.790144	532.315	24.665	C27H41N5O6	False	1.52677	0.000528833	0.0395222	-1.52677	L-Leucyl-L-tryptophyl-L-threonyl-L-leucine	15.1078	14.7824	15.5454	15.6391	14.5373	15.6182	15.6755	13.5155	14.1719	12.3159	13.6534	14.8205	14.0217	13.7194
X22071	-0.465055	0.420895	-0.251932	-0.981482	-1.11766	-1.16965	-1.80667	0.0782142	0.601132	0.372261	1.54904	1.09016	1.15023	0.530506	280.193	21.259	C19H23N2	False	1.42657	0.000529446	0.0395222	1.42657	ZINC04272054	16.7636	17.5872	16.9617	16.2836	16.157	16.1087	15.5166	17.2686	17.7547	17.5419	18.6358	18.2093	18.2651	17.689
X77093	-0.559749	-0.743709	-0.397806	-0.26616	-1.18327	-1.16012	-0.928352	-0.756458	1.31066	1.39743	1.26741	1.41607	0.6624	-0.0583435	759.434	19.593	C33H68O17	True	2.77371	0.000531139	0.0395823	2.77371	2,5,8,11,14,17,20,23,26,29,32,35,38,41,44,47-Hexadecaoxanonatetracontan-49-ol	12.7171	12.3762	13.0171	13.2611	11.5617	11.6046	12.0341	12.3526	16.1829	16.3437	16.1027	16.3782	14.9817	13.6462
X7089	1.19435	1.88018	0.440719	0.847012	0.818487	0.212236	0.675696	-0.897302	-0.46966	-0.611671	-1.36966	-1.11598	-0.531151	-1.07326	153.127	43.72	C10H18O2	False	0.701072	0.000532417	0.0396113	-0.701072	6-endo-Hydroxycineole|C03092	18.4188	18.6961	18.1141	18.2783	18.2668	18.0217	18.2091	17.5731	17.746	17.6885	17.3821	17.4846	17.7211	17.5019
X15808	0.579444	1.67975	-0.499105	0.70423	1.34504	0.663763	0.813491	0.119179	-1.14924	0.0677468	-0.857231	-0.896281	-1.33013	-1.24065	233.189	42.837	C16H26O2	False	1.93236	0.000534323	0.039613	-1.93236	Methyl farnesoate|C16503	15.6016	17.0092	14.2218	15.7612	16.581	15.7094	15.901	15.0127	13.39	14.9469	13.7636	13.7136	13.1586	13.2731
X39992	-0.520221	-1.04411	0.0797089	-0.100414	-0.962941	-2	-0.730138	0.205566	1.14812	-0.0997453	1.15573	0.848952	1.44193	0.638734	414.32	36.267	C22H41N5O	False	1.55666	0.000534897	0.039613	1.55666	Phloeodictine A5	15.0482	14.5136	15.6604	15.4766	14.5964	13.4758	14.834	15.7888	16.7506	15.4773	16.7584	16.4453	17.0504	16.2308
X50768	1.01551	0.374735	0.25039	0.776151	1.49417	0.592985	0.701357	-1.05139	-1.99869	-0.200793	-1.66828	0.0272449	-0.395039	0.0816499	497.075	45.537	C21H20O12S	True	5.14011	0.000535106	0.039613	-5.14011	{[6-(5,7-dihydroxy-4-oxo-2-phenyl-4H-chromen-6-yl)-3,4,5-trihydroxyoxan-2-yl]methoxy}sulfonic acid	17.0727	14.8581	14.4283	16.2454	18.727	15.6124	15.9869	9.92914	6.65511	12.869	7.79708	13.6571	12.1976	13.8451
X39089	-0.821766	-1.78617	0.0707483	-1.07173	-1.23465	0.00771894	-0.522829	0.0727641	1.32308	0.677723	1.10155	0.990486	-0.132026	1.3251	407.231	20.125	C23H32N2O3	False	1.46166	0.000537431	0.0397169	1.46166	1-{12-ethyl-5,6-dimethoxy-8,16-diazapentacyclo[10.6.1.0??,?.0??,?.0???,???]nonadeca-2(7),3,5-trien-8-yl}ethan-1-one	17.3742	16.4535	18.2263	17.1356	16.9801	18.1661	17.6596	18.2282	19.4219	18.8058	19.2104	19.1043	18.0327	19.4238
X35368	-0.280578	-2	-1.02683	-0.76908	-0.582104	-0.840288	0.249714	0.479991	1.30077	1.30953	1.1359	0.405812	0.838015	-0.133805	378.211	45.819	C16H29N5O4	True	1.56369	0.000538292	0.0397169	1.56369	Glycinamide, L-alanyl-L-prolyl-L-leucyl-	16.3057	14.453	15.5403	15.8047	15.9964	15.7317	16.8496	17.0858	17.9276	17.9365	17.7585	17.0097	17.453	16.4562
X67573	-1.33549	-0.20725	-0.111313	-0.0755578	-0.310855	-2	-1.3552	0.729617	0.347477	0.312545	1.36968	1.08476	0.917371	0.667006	638.352	22.459	C33H51NO11	False	1.23625	0.00054025	0.0397954	1.23625	(2E,4E)-12-[(4S,4aS,6R,8S,8aR)-4-{[(2R)-1,2-dihydroxy-2-[(2R,5R,6R)-2-methoxy-5,6-dimethyl-4-methylideneoxan-2-yl]ethylidene]amino}-8-methoxy-7,7-dimethyl-hexahydro-2H-pyrano[3,2-d][1,3]dioxin-6-yl]-11-oxododeca-2,4-dienoic acid	13.4408	14.3401	14.4165	14.445	14.2575	12.885	13.4251	15.0868	14.7822	14.7544	15.597	15.3699	15.2365	15.0369
X77944	-0.965055	-0.0490324	0.1184	-0.998956	-0.686435	-2	-0.443814	0.854788	0.724353	0.676581	1.2798	1.0577	0.861445	-0.160734	773.385	19.643	C36H60N4O10S2	False	1.82817	0.000542528	0.0397986	1.82817	1-Propanaminium, 3,3'-[(9,10-dihydro-9,10-dioxo-1,4-anthracenediyl)diimino]bis[N,N,N-triethyl-, bis(ethyl sulfate)	12.9765	14.0837	14.286	12.9355	13.3133	11.4004	13.6065	15.1761	15.0184	14.9607	15.6898	15.4213	15.1841	13.9486
X39333	-0.00532778	1.47828	0.307304	1.05509	1.2914	0.183191	0.903964	0.275151	-1.05325	-0.797087	-1.96529	-0.800975	0.00174387	-0.874207	409.173	43.127	C21H26N2O5	False	3.6851	0.000543089	0.0397986	-3.6851	scholaricine N(4)-oxide	14.3122	17.9822	15.0855	16.9354	17.5199	14.7785	16.5615	15.006	11.7199	12.3535	9.46371	12.3439	14.3296	12.1628
X37578	-0.00129313	-1.05632	-0.900797	-0.887775	-1.09105	-0.654143	-0.774556	-0.542461	0.406753	0.957796	1.96144	1.49645	0.623712	0.462234	395.228	20.997	C18H34O9	False	1.41949	0.000544039	0.0397986	1.41949	2,5,8,10,13-Pentaoxaheptadecanoic acid, 9-oxo-, 2-butoxyethyl ester	15.9869	15.0101	15.1541	15.1661	14.9779	15.3824	15.2709	15.4858	16.3647	16.8749	17.8042	17.3736	16.5656	16.4161
X71959	-0.0577229	-0.74791	-0.654913	-1.22388	-1.0892	-1.44123	-0.0639641	0.267286	1.14683	1.29465	1.54689	1.15057	0.413434	-0.540849	684.334	20.698	C45H41N5O2	False	1.96095	0.000544612	0.0397986	1.96095	Benzyl N-({2'-[1-(triphenylmethyl)-1H-tetrazol-5-yl][1,1'-biphenyl]-4-yl}methyl)valinate	14.3238	13.4264	13.5473	12.8076	12.9827	12.525	14.3157	14.7463	15.8899	16.0821	16.41	15.8948	14.9364	13.6956
X47443	-0.191526	-0.572874	-0.888032	-0.0877357	-0.817241	-1.02574	-1.72935	-0.253788	0.292365	1.63267	0.122886	0.912632	1.11615	1.48958	470.269	20.336	C28H39NO3S	False	1.67845	0.000546014	0.0397986	1.67845	2-Dodecylisoquinolinium tosylate	15.7735	15.3518	15.0033	15.8883	15.0816	14.851	14.073	15.7047	16.3086	17.7907	16.1212	16.9945	17.2195	17.6325
X51450	-0.761086	-0.279321	-0.0825063	0.263112	-1.10147	-1.10102	-2	-0.0968899	0.599992	1.22258	0.603665	1.08367	1.03095	0.795939	502.266	18.65	C25H35N5O6	False	2.56065	0.000546221	0.0397986	2.56065	astin G	14.577	15.401	15.7376	16.3287	13.9948	13.9956	12.1542	15.713	16.9049	17.9698	16.9112	17.7322	17.6421	17.2401
X53287	0.231732	0.749119	1.22065	0.436376	-0.275306	1.33596	1.55261	-0.476736	-1.05431	-0.744003	-0.387214	0.307151	-1.22068	-1.67535	517.232	22.518	C29H30N6O2	False	2.32134	0.000547069	0.0397986	-2.32134	BAS 04419614	15.8543	16.6549	17.3844	16.171	15.0698	17.5628	17.898	14.7582	13.8646	14.3447	14.8967	15.971	13.6071	12.9037
X42079	-0.142256	1.38194	0.612279	0.937071	-0.133668	1.07905	1.48335	0.131556	-0.684442	-1.15823	-1.0083	-0.0613576	-0.662933	-1.77406	429.878	19.166	C21H35NO6S	False	3.32186	0.000547437	0.0397986	-3.32186	w/o MS2:2-amino-3-[[(6E,9E)-5-hydroxy-8-methoxy-5,9,13,14-tetramethyl-2-oxo-1-oxacyclotetradeca-6,9-dien-4-yl]sulfanyl]propanoic acid	11.0252	14.4215	12.7065	13.4302	11.0444	13.7466	14.6475	11.6354	9.8171	8.76138	9.09546	11.2055	9.86503	7.38915
X77559	-0.504827	-0.051494	0.382562	-2	-1.31969	-0.523169	-1.11709	0.654839	0.933293	0.477798	1.33305	1.08011	-0.0516194	0.771142	767.367	19.936	C35H58O18	False	5.02206	0.000550901	0.0399851	5.02206	Periplocae oligosaccharide D2	13.4361	14.9688	16.4364	8.16123	10.6809	13.374	11.3659	17.357	18.2985	16.7584	19.6502	18.7949	14.9684	17.7503
X21551	0.26048	0.431463	-0.204306	2	1.25169	1.36651	0.0772473	-0.0156389	-0.934364	-0.671669	-1.29061	-0.829331	-0.807324	-0.731597	277.14	46.187	C12H24N2OS2	True	1.90853	0.000551856	0.0399894	-1.90853	1,2-Dithiolane-3-pentanamide, N-[2-(dimethylamino)ethyl]-	15.7464	15.9626	15.1584	18.0701	17.0002	17.1455	15.5146	15.3971	14.2349	14.5672	13.7842	14.3678	14.3956	14.4914
X40709	-1.07697	0.109453	-1.719	-1.48044	-1.1679	-0.163832	0.30819	1.22321	0.380744	1.13378	1.20089	0.77614	0.473766	0.00196651	420.19	20.046	C22H27N3O4	False	6.80314	0.00055518	0.0401331	6.80314	neolamarckine A	6.3447	11.7873	3.39947	4.49382	5.92758	10.5337	12.699	16.8966	13.0319	16.4864	16.7942	14.8457	13.4586	11.2942
X30558	0.54754	1.7374	1.21096	0.904217	0.161974	0.6051	0.144098	-0.454176	-1.39544	-1.36274	-1.67696	0.0739347	-0.376896	-0.119019	340.211	45.055	C17H27N5O	True	1.64957	0.000557907	0.0401331	-1.64957	N-(7H-purin-6-yl)dodecanamide	16.8893	18.1827	17.6105	17.277	16.4702	16.9519	16.4508	15.8004	14.7773	14.8128	14.4713	16.3745	15.8844	16.1648
X18007	0.544602	1.6741	0.874908	0.729248	1.01525	1.05253	-0.488397	0.00319257	-1.05031	-1.08454	-1.49282	-0.698571	-1.10889	0.0296954	250.187	48.486	C12H25N3O	False	1.28001	0.000557991	0.0401331	-1.28001	2,4-Dinitrophenylhydrazone-2-Undecanone	15.9911	16.9278	16.2651	16.1443	16.3814	16.4124	15.1345	15.5422	14.6685	14.6401	14.3015	14.9602	14.6199	15.5641
X33130	-0.839272	0.145849	-0.0108052	-1.14797	-0.779994	-1.51378	-1.2861	0.636131	-0.167219	1.63212	1.37299	0.671074	0.37666	0.910309	360.206	22.042	C20H32ClNO	False	1.20547	0.000558647	0.0401331	1.20547	Pyrrolidine, 1-(4-allyloxy-3,5-dipropylbenzyl)-, hydrochloride	14.6787	15.4438	15.3222	14.4389	14.7247	14.1548	14.3316	15.8246	15.2007	16.5982	16.397	15.8518	15.6231	16.0376
X14401	1.6535	0.206582	0.774182	0.348356	0.580281	1.10109	0.533861	-1.5881	-1.0278	-0.376355	-1.32642	0.394064	-1.41864	0.145398	223.053	31.13	C12H11ClO2	True	4.5691	0.000558802	0.0401331	-4.5691	cis-2,3-Dihydro-2,3-dihydroxy-4'-chlorobiphenyl|C06585	18.4571	14.0055	15.7518	14.4417	15.1552	16.7576	15.0124	8.48394	10.2078	12.212	9.28904	14.5823	9.00529	13.8173
X30826	-0.65596	-0.77856	0.764135	-0.61751	-0.981636	-1.73174	-1.19836	0.418569	1.37277	0.231348	1.2937	1.24358	0.495652	0.144019	342.225	19.832	C17H29N5O	False	4.28497	0.000559842	0.0401331	4.28497	N-[(E)-Amino(4-methoxyanilino)methylidene]-N''-octylguanidine	12.5088	12.1552	16.6048	12.6197	11.5694	9.40592	10.9443	15.6081	18.3603	15.0681	18.1322	17.9877	15.8304	14.8162
X38814	-0.0818128	-0.490261	0.48387	-1.424	-0.811299	-1.2153	-1.65387	-0.199296	1.04307	0.28558	1.28974	0.92226	0.622663	1.22866	405.234	19.781	C24H34N2S	False	5.38026	0.000560144	0.0401331	5.38026	N-Decyl-N'-(diphenylmethyl)thiourea	11.3319	9.85066	13.3833	6.4645	8.68644	7.22135	5.6309	10.9058	15.4112	12.6642	16.3057	14.9731	13.8866	16.0842
X63008	-1.82428	-1.45545	-0.162157	0.134781	-0.847903	-0.915028	-0.239556	0.220072	0.794709	0.551913	0.814948	1.26431	1.62697	0.0366689	596.33	24.298	C31H47N3O7	False	1.64799	0.000561968	0.0401609	1.64799	Leualacin	12.388	12.7887	14.1936	14.5162	13.4487	13.3757	14.1095	14.6088	15.2331	14.9693	15.2551	15.7432	16.1372	14.4096
X26603	0.944319	0.660052	0.175637	2	1.01018	0.271458	0.122494	-0.261954	-0.668724	-0.833143	-1.35143	-0.919862	-1.1153	-0.33465	312.216	44.916	C16H27N5	True	1.09986	0.000562334	0.0401609	-1.09986	9-undecylpurin-6-amine	16.4575	16.258	15.918	17.4096	16.5037	15.9853	15.8807	15.6109	15.3255	15.2101	14.8463	15.1492	15.012	15.5599
X41004	-0.366901	-0.371149	-0.046078	-1.79454	-0.497958	-1.0082	-1.25886	0.111606	0.486006	0.653555	1.83568	0.90295	0.0141286	1.33975	422.191	19.437	C32H23N	False	1.46742	0.000564764	0.0402229	1.46742	4-[(9H-Fluoren-9-ylidene)methyl]-N,N-diphenylaniline	14.2379	14.2338	14.5462	12.8657	14.1119	13.6215	13.3806	14.6978	15.0577	15.2187	16.3549	15.4584	14.6041	15.8782
X45264	-0.0925707	-0.885903	-0.745084	-1.58633	-1.18766	-0.684062	-0.0544327	-0.168793	1.02812	1.52972	1.56316	1.16577	0.155302	-0.0372291	454.234	19.941	C25H31N3O5	False	2.45134	0.000565007	0.0402229	2.45134	7',7',8,8-tetramethyl-5a-nitro-1,2,3,5,5a,6,7',8,8a,8',9,9a-dodecahydro-1'H-spiro[cyclopenta[f]indolizine-7,3'-pyrano[2,3-g]indole]-2',9'-done	15.964	14.664	14.8948	13.5163	14.1696	14.9948	16.0265	15.8391	17.8003	18.6222	18.677	18.0259	16.3701	16.0546
X54351	-0.73515	-0.878114	-0.518402	0.49299	-1.81573	-1.51874	-0.356367	0.813561	0.763595	1.18691	0.211573	0.797509	1.44922	0.10715	525.328	36.252	C29H46N2O5	True	1.5142	0.000572404	0.0406845	1.5142	1-Benzyl hydrogen (2S-trans)-4-(tert-butoxy)-pyrrolidine-1,2-dicarboxylate, compound with dicyclohexylamine (1:1)	17.9931	17.8509	18.2086	19.2144	16.9186	17.2139	18.3698	19.5331	19.4834	19.9044	18.9345	19.5172	20.1652	18.8307
X71139	-1.45187	-0.156371	0.590331	-1.10136	-1.10802	-1.71544	-0.252289	0.817653	0.963655	0.158835	1.3589	1.02303	0.732633	0.140321	675.329	19.803	C38H46N2O9	False	4.08533	0.0005743	0.0407543	4.08533	phomachalasin A	9.91108	13.4768	15.532	10.8758	10.8575	9.18564	13.2128	16.1577	16.5595	14.3443	17.6474	16.7229	15.9237	14.2934
X64745	0.81077	-1.56275	-1.26743	-0.662432	-1.15459	-0.987677	-0.367333	-0.115222	0.911313	1.14608	1.13583	0.151207	0.890794	1.07144	611.329	33.73	C36H48N2O3S	False	4.40921	0.000575837	0.0407983	4.40921	N-{2-[4-(Hexadecyloxy)phenyl]-1H-indol-3-yl}benzenesulfonamide	12.8398	5.78425	6.66211	8.46056	6.99756	7.49373	9.33778	10.0872	13.1387	13.8366	13.8061	10.8792	13.0777	13.6147
X67774	-0.293189	0.0386037	-0.916418	-1.43019	-0.0450789	-1.13909	-1.57905	-0.218586	0.320421	1.16518	1.54252	0.515334	0.993324	1.04623	640.298	21.955	C35H43N3O7	False	1.36436	0.00057813	0.0408958	1.36436	(2R)-2-{[(2S)-1-hydroxy-2-{[(2R)-1-hydroxy-2-[(1-hydroxyhexylidene)amino]-4-(4-hydroxyphenyl)butylidene]amino}-4-(4-hydroxyphenyl)butylidene]amino}-3-phenylpropanoic acid	13.9037	14.1991	13.3489	12.8916	14.1246	13.1507	12.7591	13.9701	14.4499	15.2019	15.5378	14.6234	15.0489	15.096
X72962	1.55694	0.602337	0.26063	-0.42438	1.1804	1.4665	0.54463	-1.03891	-0.861015	-1.42702	-0.188631	-0.292914	-1.46254	0.0839782	696.345	24.218	C31H47N9O8	False	4.80128	0.000579578	0.0409333	-4.80128	L-Tryptophyl-L-leucyl-L-lysyl-L-asparaginylglycylglycine	15.6573	12.5647	11.4577	9.23846	14.4375	15.3643	12.3778	7.24757	7.82389	5.99021	10.0022	9.66437	5.87514	10.8854
X50418	-0.303841	-0.309271	-1.30772	-0.78766	-0.265221	-1.8873	-0.42749	0.244965	0.790113	1.08335	1.25582	0.168214	1.78924	-0.0431923	494.323	44.734	C26H43N3O6	True	1.71156	0.0005861	0.0413284	1.71156	vinylamycin	16.1	16.0939	14.9629	15.552	16.1438	14.3064	15.96	16.7217	17.3392	17.6713	17.8667	16.6347	18.4709	16.3953
X6543	-0.630504	-1.6436	-0.224568	-0.374334	-0.985294	-1.04328	-0.695049	1.04119	1.5835	0.422946	1.30695	-0.446898	1.02283	0.666107	147.08	35.652	C10H12O2	True	0.938291	0.000593418	0.0416575	0.938291	p-Cumate|C06578	19.7586	19.1642	19.9968	19.9089	19.5504	19.5164	19.7208	20.7396	21.0578	20.3768	20.8955	19.8664	20.7288	20.5195
X36807	-0.636937	-0.193601	-0.259423	-0.290251	-0.38393	-1.93431	-1.55768	-0.342579	0.344954	1.23122	1.09179	0.544566	1.15978	1.22639	389.249	23.814	C22H38O2S	False	1.96072	0.000593426	0.0416575	1.96072	1-(Butane-1-sulfinyl)-4-(dodecyloxy)benzene	13.4515	14.0304	13.9444	13.9042	13.7819	11.7577	12.2494	13.8359	14.7335	15.8906	15.7086	14.9941	15.7974	15.8844
X32724	-0.940169	-1.11012	-0.830166	-0.0371963	-1.84819	-0.488156	-0.0645324	-0.29837	1.00958	1.67811	0.422378	0.997798	1.14052	0.368514	357.217	21.855	C21H28N2O3	False	1.51892	0.000593571	0.0416575	1.51892	(-)-Cylindrocarine	16.8885	16.7186	16.9984	17.791	15.9808	17.3403	17.7637	17.53	18.8374	19.5056	18.2504	18.8256	18.9683	18.1966
X43749	-1.24188	-1.13774	0.775161	-1.04605	-0.967292	-1.08619	-0.610846	0.106853	1.31383	0.783532	1.35319	1.06098	0.811246	-0.114797	442.252	19.045	C27H36ClNO2	False	1.53291	0.000595303	0.0417004	1.53291	1-[4-(Benzyloxy)naphthalen-1-yl]-2-(dibutylamino)ethan-1-ol--hydrogen chloride (1/1)	13.7486	13.8537	15.7847	13.9463	14.0258	13.9057	14.3856	15.1101	16.3285	15.7932	16.3682	16.0732	15.8212	14.8863
X36532	-0.762765	-1.31317	-1.15667	-0.528566	-1.56998	0.644803	-0.590085	0.306837	0.907712	1.34683	1.11765	1.31579	-0.0777814	0.359397	387.228	20.997	C22H27NO4	False	1.7665	0.000596055	0.0417004	1.7665	Thalicsessine|C08714	17.7665	17.1215	17.3049	18.0409	16.8206	19.4158	17.9688	19.0198	19.7239	20.2384	19.9699	20.2021	18.5691	19.0814
X13513	0.299947	-0.265918	1.63451	1.292	0.913089	0.714752	0.826406	-0.00826259	0.0318185	-0.613797	-1.09074	-1.25604	-0.881068	-1.59669	215.081	33.393	C8H17O3P	False	1.20013	0.000597825	0.0417587	-1.20013	2-ethoxy-4,4,5,5-tetramethyl-1,3,2-dioxaphospholane	16.2114	15.7725	17.2467	16.981	16.6871	16.5332	16.6198	15.9723	16.0034	15.5026	15.1326	15.0044	15.2953	14.7401
X56761	0.296863	0.291947	-1.57246	-1.66302	-1.06949	-0.905796	-0.551273	0.287702	0.267629	1.29586	0.820092	0.402906	1.52317	0.575872	544.274	23.36	C25H39N5O7	False	5.59962	0.000602621	0.0420278	5.59962	L-Leucyl-L-valyl-L-alanylglycyl-L-tyrosine	12.7322	12.7136	5.65033	5.30722	7.55582	8.17597	9.51907	12.6975	12.6215	16.5169	14.7145	13.134	17.3781	13.7892
X75960	-0.656521	-0.527028	-1.42863	-0.289214	-0.0697686	-0.664254	-1.75839	0.0474698	0.120301	1.53611	0.37615	0.569741	1.26901	1.47503	739.346	22.563	C43H48N4O6	False	1.24293	0.000603791	0.0420437	1.24293	16'-Desoxy-18'-oxo-vobtusin	13.9249	14.0294	13.3022	14.2212	14.3982	13.9187	13.0362	14.4927	14.5515	15.6933	14.7578	14.9139	15.4779	15.6441
X33104	1.04835	1.3434	0.447814	0.700386	0.584587	0.722586	0.326156	0.12393	0.403498	-2	-1.40744	-0.823723	-0.980876	-0.367263	360.159	35.86	C23H21NO3	True	4.40951	0.000618201	0.0429092	-4.40951	2-(n-butyl)-5-methoxy-7-phenyl-2H-benzo[de]isoquinoline-1,6-dione	13.3925	14.2727	11.6009	12.3544	12.009	12.4207	11.238	10.6347	11.4687	3.93628	6.06622	7.80761	7.33877	9.16935
X31251	0.22408	-0.299781	-0.0209918	-1.79313	-0.899424	-1.6409	-0.738354	-0.404295	0.959894	0.614948	1.31991	0.87826	0.873891	0.925888	345.2	20.533	C20H28N2OS	False	5.0545	0.000619724	0.0429092	5.0545	1H-Pyrazole-3-propanol, 1-(cyclohexylmethyl)-5-[4-(methylthio)phenyl]-	13.883	12.09	13.0442	6.97852	10.0375	7.49956	10.5888	11.7322	16.4016	15.2209	17.6339	16.1222	16.1072	16.2852
X33501	0.22224	1.72543	0.506334	1.15014	0.200001	0.885502	0.559326	0.328945	-1.05039	-0.192565	-1.65952	-0.634133	-1.64079	-0.400511	363.166	43.672	C17H22N4O5	False	1.91272	0.000620222	0.0429092	-1.91272	3-[[(E)-4-(5-NITRO-2-FURYL)BUT-3-EN-2-YLIDENE]AMINO]-5-(PIPERIDIN-1-YLMET HYL)OXAZOLIDIN-2-ONE	13.7824	15.6996	14.1448	14.9659	13.7541	14.6284	14.2124	13.9185	12.1593	13.2534	11.3824	12.6902	11.4063	12.9882
X15337	1.24936	1.52126	0.924232	-0.157287	1.04237	0.657614	-0.0736861	-0.997425	-1.35005	-1.66697	-0.308945	-0.340767	-0.877857	0.378147	230.091	31.42	C8H18NO3P	True	6.14253	0.000620647	0.0429092	-6.14253	Phosphonic acid, 2-pyrrolidinyl-, diethyl ester	17.87	19.002	16.5164	12.0136	17.0082	15.4063	12.3617	8.51588	7.04778	5.72834	11.3822	11.2498	9.01368	14.2428
X63681	-0.291508	-0.80618	-1.34972	-0.987751	-0.338684	0.181569	-1.63325	-0.190823	-0.0372362	1.16764	1.23478	1.15228	0.403543	1.49534	601.959	22.521	C17H15N7O8S4	False	2.19582	0.000621035	0.0429092	2.19582	Cefotetan disodium|C14007	12.4223	11.6653	10.8659	11.3983	12.3529	13.1181	10.4489	12.5704	12.7962	14.5683	14.667	14.5457	13.4445	15.0503
X39595	-0.201538	-0.727668	-0.187741	-1.62284	-1.32614	-1.08862	-0.0663324	0.270038	1.11052	0.838941	1.63201	1.32261	0.464407	-0.417642	411.192	21.047	C23H26N2O5	False	2.25697	0.000622876	0.0429698	2.25697	Quinaprilat|C21540	15.2403	14.4443	15.2612	13.0898	13.5388	13.8981	15.4449	15.9538	17.2255	16.8146	18.0146	17.5464	16.2479	14.9134
X61952	0.529952	-0.718399	-1.74298	-0.67864	-1.38318	-0.309484	-0.863457	-0.306049	0.607127	1.47985	1.03574	1.17318	0.868151	0.308188	587.611	21.132	C39H80O	False	4.63205	0.000631437	0.043493	4.63205	20,24,32-Trimethylhexatriacontan-1-ol	12.6116	8.69414	5.47888	8.8189	6.60796	9.97737	8.23893	9.98814	12.8538	15.5925	14.1988	14.6302	13.6729	11.9157
X37956	-0.826017	-0.617763	0.0286396	-0.234934	-0.690096	-0.720747	-2	-0.140822	0.0794785	1.64178	0.822636	0.907822	0.648295	1.25939	398.238	21.517	C16H33N5O5	False	2.2094	0.000635334	0.0436939	2.2094	Antibiotic KA 6606 XVII	13.753	14.0616	15.0194	14.6289	13.9544	13.909	11.7798	14.7683	15.0948	17.4098	16.196	16.3222	15.9376	16.8432
X5044	-1.46105	-2	-0.451418	-0.181865	-1.19452	0.108703	-0.223903	0.558753	1.15415	0.620357	0.700836	1.10677	0.748527	0.623162	129.127	47.142	C8H18O2	True	1.00519	0.000637904	0.0438031	1.00519	Octane-1,8-diol|C14218	17.1824	16.7692	17.8268	17.9988	17.3525	18.1842	17.972	18.4715	18.8515	18.5108	18.5621	18.8212	18.5926	18.5126
X41861	-0.292902	-0.535151	0.0631733	-0.459411	-1.39482	-1.54626	-1.1528	0.147212	0.633666	0.903914	1.20994	1.74266	0.962714	-0.281931	428.204	18.698	C20H25N7O4	False	1.42818	0.000640322	0.0438594	1.42818	N-[[2-[2-(5-nitrotetrazol-2-yl)acetyl]-3,4-dihydro-1H-isoquinolin-1-yl]methyl]cyclohexanecarboxamide	15.3031	15.0754	15.6378	15.1466	14.2674	14.1251	14.4949	15.7168	16.174	16.428	16.7157	17.2164	16.4833	15.3134
X23502	0.103998	0.938825	0.980967	1.41029	0.36762	1.03056	0.330902	0.429919	0.197322	-0.943843	-1.57953	-1.7629	-0.777777	-0.726361	291.098	47.468	C11H25OPS2	False	4.5258	0.000640693	0.0438594	-4.5258	S-Butyl S-hexyl methylphosphonodithioate	10.3845	12.9457	13.075	14.3921	11.1932	13.2271	11.0806	11.3844	10.6708	7.16976	5.21951	4.65694	7.67924	7.83698
X11875	1.39027	1.78346	0.903695	-0.0669471	1.03948	0.393819	-0.141271	-0.799697	-1.23697	-1.55402	-0.597715	-0.856516	-0.353595	0.0960073	200.2	48.521	C12H25NO	True	1.49138	0.000642182	0.0438939	-1.49138	(2R,3S)-clavaminol B	17.5651	17.9522	17.0861	16.1306	17.2198	16.5842	16.0575	15.4093	14.9789	14.6668	15.6081	15.3534	15.8485	16.2911
X62150	-0.431732	-1.41392	0.142274	-0.762455	-0.354992	-0.289489	-2	0.738392	1.40285	0.510442	0.498809	0.850861	-0.153344	1.35755	589.255	23.27	C34H32N6O4	False	2.3628	0.000645287	0.0440386	2.3628	Hydantoin, 3,3'-(ethylenediiminodimethylene)bis(5,5-diphenyl-	10.2796	8.71924	11.1915	9.75418	10.4015	10.5056	7.63685	12.1385	13.1941	11.7764	11.7579	12.3172	10.7218	13.1221
X53582	-0.909888	-0.274348	-0.665675	-0.992324	-0.670153	-0.89052	-1.14337	-0.424894	0.740212	1.56918	1.90701	1.00331	0.415284	0.33618	519.243	20.269	C24H38O12	False	0.961512	0.000646329	0.0440423	0.961512	4-[(1E)-3-{[6-({[3,4-dihydroxy-4-(hydroxymethyl)oxolan-2-yl]oxy}methyl)-3,4,5-trihydroxyoxan-2-yl]oxy}but-1-en-1-yl]-4-hydroxy-3,5,5-trimethylcyclohex-2-en-1-one	14.6208	15.0064	14.769	14.5708	14.7662	14.6325	14.4791	14.9151	15.622	16.125	16.33	15.7816	15.4249	15.3769
X29281	-1.19542	-1.67352	-0.683433	-0.336719	-1.16054	0.342618	-0.74029	1.38134	0.964689	1.08564	0.655576	1.01009	-0.394621	0.744602	331.187	48.188	C16H26N3O3	True	1.09137	0.000648299	0.0441091	1.09137	Amphikeumin	16.7414	16.4061	17.1004	17.3435	16.7659	17.8199	17.0606	18.5483	18.2561	18.3409	18.0394	18.288	17.3029	18.1018
X44481	-0.669428	0.0620269	-0.46743	-0.989851	-1.50852	-1.86612	0.229661	0.565121	0.352839	1.24004	1.2625	1.31207	0.491669	-0.0145751	448.25	20.268	C29H29N5	False	2.20885	0.000656961	0.044611	2.20885	2,6-Bis[3-(2,4,6-trimethylphenyl)-1H-pyrazol-1-yl]pyridine	15.7193	16.8047	16.019	15.2438	14.4741	13.9434	17.0535	17.5513	17.2363	18.5528	18.5862	18.6597	17.4423	16.691
X29702	-0.990474	-0.986135	-1.07803	-0.134387	0.742633	-0.770873	-1.98003	1.03265	1.16146	0.169418	0.474379	0.407072	1.1486	0.803707	334.136	23.114	C17H19F2N3O3	False	2.42683	0.000657678	0.044611	2.42683	Lomefloxacin|C07078	12.082	12.0891	11.9389	13.4811	14.9144	12.4409	10.4648	15.3884	15.5989	13.9776	14.476	14.366	15.5779	15.0142
X5089	0.196118	1.6496	0.717559	0.44121	0.78135	0.858521	0.568002	0.381825	0.055081	-1.89375	-0.340048	-1.04005	-1.41883	-0.956585	130.065	38.354	C9H9NO	True	2.13109	0.000663232	0.0448878	-2.13109	3-Methyloxindole|C02366	14.9556	17.0355	15.7018	15.3063	15.793	15.9035	15.4877	15.2213	14.7538	11.965	14.1883	13.1866	12.6446	13.3061
X34879	-0.958884	-0.299486	-0.364157	0.000213962	-1.64653	-0.112334	-1.94046	0.427866	1.29078	0.939634	0.381823	1.17164	0.0536304	1.05627	374.224	20.085	C24H27N3O	False	1.37669	0.000663773	0.0448878	1.37669	Phenol, 2-(2H-naphtho[1,2-d]triazol-2-yl)-4-(1,1,3,3-tetramethylbutyl)-	15.7418	16.3389	16.2803	16.6102	15.1192	16.5083	14.8531	16.9974	17.7788	17.4608	16.9558	17.6709	16.6586	17.5664
X7905	0.387544	1.12849	0.497796	1.08469	1.48752	0.323143	0.476609	0.312691	-0.172236	-0.812517	-1.76838	-1.67309	-0.841481	-0.430784	163.038	34.07	C9H8O4	False	1.19241	0.00066734	0.0449542	-1.19241	3-(4-Hydroxyphenyl)pyruvate|C01179	15.4633	16.0375	15.5487	16.0035	16.3157	15.4134	15.5323	15.4053	15.0295	14.5334	13.7927	13.8665	14.5109	14.8292
X37184	-0.528493	-0.79503	-0.721038	-1.05029	-1.05342	-1.54704	0.444665	0.167615	0.965891	1.79517	1.27434	0.738611	0.581089	-0.272078	392.238	21.316	C29H29N	False	1.72735	0.000667742	0.0449542	1.72735	N,N-Bis(3,4-dimethylphenyl)-4'-methyl[1,1'-biphenyl]-4-amine	15.2261	14.9192	15.0044	14.6253	14.6217	14.0533	16.3466	16.0276	16.9468	17.9016	17.3019	16.6851	16.5037	15.5213
X7629	0.0428726	0.307499	1.0795	0.259416	1.62813	0.8672	1.22948	0.283458	-0.439039	-0.489091	-0.953446	-0.709293	-1.49698	-1.6097	159.091	27.272	C10H10N2	False	1.13406	0.000667781	0.0449542	-1.13406	1,4'-Bipyridinium	15.9738	16.1678	16.7337	16.1325	17.136	16.5781	16.8437	16.1501	15.6205	15.5838	15.2433	15.4223	14.8449	14.7622
X31866	-0.537608	-1.43486	-0.0300514	-1.63301	-1.08078	-0.313261	-0.258986	0.447046	1.4701	0.833212	1.58848	1.03047	-0.101897	0.0211469	350.209	19.934	C20H29O5	False	1.49531	0.000672722	0.0452066	1.49531	PUBCHEM_53438734	17.4519	16.564	17.9542	16.3679	16.9144	17.6739	17.7276	18.4263	19.4387	18.8085	19.5559	19.0037	17.8831	18.0049
X15267	0.732605	1.85731	1.2477	0.192461	-0.051518	0.877354	0.349395	-1.05529	-0.0626002	-1.10981	0.336531	-1.57329	-1.06073	-0.680118	229.19	30.883	C12H24N2O2	True	2.1729	0.000673559	0.0452066	-2.1729	Diamide-Dodecanedioic acid	14.6016	16.2448	15.3542	13.8124	13.456	14.8131	14.0417	11.9894	13.4398	11.9098	14.0229	11.2326	11.9815	12.5376
X55769	-0.476923	0.316135	-0.771388	-0.160794	-2	-1.17115	-0.866166	0.491028	0.358794	1.17709	1.13336	1.11173	1.06606	-0.0839603	536.333	37.711	C35H47NS	True	1.67916	0.000676107	0.0452739	1.67916	10H-Phenothiazine, 3,7-dioctyl-10-(phenylmethyl)-	21.3077	22.1948	20.9783	21.6613	19.4655	20.5311	20.8723	22.3904	22.2425	23.1578	23.1089	23.0847	23.0336	21.7472
X7781	1.07545	0.563235	0.952994	-0.240181	1.44923	-0.201031	1.72208	-0.160416	-0.627699	-1.03615	-0.930952	-1.12027	-0.093412	-1.35289	161.095	45.725	C11H14O2	False	1.35704	0.000676594	0.0452739	-1.35704	Methyleugenol|C10454	16.6176	16.1605	16.5084	15.4435	16.9512	15.4784	17.1948	15.5146	15.0976	14.7331	14.8269	14.658	15.5744	14.4504
X39945	-0.481071	-0.467281	-0.648143	-1.02577	-1.55656	0.122992	-1.12427	0.852729	0.732218	1.30781	0.869316	1.21037	-0.935403	1.14307	414.233	19.849	C16H33N5O6	False	2.62516	0.000679696	0.0454133	2.62516	Fortimicin AN	19.2065	19.2309	18.9101	18.2403	17.2988	20.2779	18.0656	21.5722	21.3585	22.3794	21.6017	22.2066	18.4006	22.0872
X29624	-2	0.293815	-0.981721	-0.423178	-0.477495	-1.40027	-0.585131	0.776323	0.337409	1.07124	0.819357	0.578457	1.36925	0.642373	333.252	48.812	C18H34N2O2	True	0.898748	0.000682149	0.0454532	0.898748	10-Undecenamide, N-(3-morpholinopropyl)-	13.8967	15.1979	14.4807	14.7948	14.7642	14.2454	14.7037	15.4692	15.2224	15.6351	15.4934	15.358	15.8026	15.3939
X77945	-0.81575	0.0148786	0.431366	-1.81821	-0.9391	-1.76832	-0.252808	0.518268	0.887334	0.334694	1.35678	0.977822	0.874834	0.198214	773.386	19.571	C44H54N4O7	False	4.36968	0.000682334	0.0454532	4.36968	conodiparine B	9.95096	12.4186	13.656	6.97278	9.5845	7.12098	11.6234	13.9142	15.0106	13.3688	16.4053	15.2794	14.9735	12.9633
X71565	0.117894	0.222228	0.787291	0.350984	1.94437	0.852622	0.974288	0.501485	-1.12092	-0.732653	-1.57795	-1.12902	-0.264565	-0.926055	680.203	11.236	C24H44N5O8PS3	False	1.6704	0.000690155	0.0458171	-1.6704	O-(Dithiophosphono)-L-seryl-L-valyl-L-prolyl-L-methionyl-L-leucine	15.6547	15.7709	16.4002	15.9142	17.6888	16.4729	16.6084	16.0819	14.275	14.7074	13.7661	14.266	15.2287	14.492
X24518	0.59469	1.62946	0.499683	-0.375726	0.443597	0.741637	1.64222	-0.219756	-0.406905	-0.397925	-0.510823	-2	-1.06642	-0.553986	298.148	21.1	C10H21N5O4	False	2.63539	0.000690372	0.0458171	-2.63539	2-(2-amino-5-carbamimidamidopentanamido)-3-hydroxybutanoic acid	12.6089	14.453	12.4396	10.8794	12.3396	12.8708	14.4758	11.1574	10.8238	10.8399	10.6386	7.94946	9.64846	10.5617
X74133	-0.204595	-1.35315	-0.762919	-1.25574	-1.04415	-0.0889882	-0.578041	-0.785481	0.747876	1.42793	1.38896	1.2382	0.474267	0.795839	712.372	21.451	C29H49N11O10	False	1.46564	0.00069088	0.0458171	1.46564	SEIAHR	15.7067	14.5924	15.165	14.6869	14.8922	15.8188	15.3444	15.1431	16.6307	17.2905	17.2527	17.1064	16.3653	16.6772
X61758	-0.882238	-0.00748623	-1.10052	-0.772916	-1.16398	-1.64533	0.37525	0.339717	0.151873	1.50194	1.3891	1.25445	0.559221	0.000924628	586.261	19.988	C25H37N7O8	False	2.16797	0.000694818	0.0459879	2.16797	N-Acetyl-L-alanyl-L-seryl-L-prolyl-N-(4-nitrophenyl)-L-lysinamide	15.01	16.2872	14.6913	15.1696	14.5987	13.8959	16.8459	16.7941	16.5198	18.4909	18.3261	18.1296	17.1145	16.2994
X20796	1.81544	1.42391	0.107222	0.0425381	1.25513	0.531577	-0.0094895	-1.54786	-1.05334	-1.1176	-0.353244	-0.347363	-0.886545	0.139628	271.281	44.325	C21H36	False	2.85735	0.00069552	0.0459879	-2.85735	Pregnane|C01523	19.7008	18.9429	16.3941	16.2689	18.6162	17.2155	16.1682	13.1903	14.1475	14.0231	15.5027	15.5141	14.4704	16.4568
X45925	-1.29884	-0.000665548	-0.260283	-2	0.320731	-1.29781	-0.53254	1.23547	1.00487	0.636613	1.17658	0.0460866	0.506493	0.537277	459.213	20.242	C24H27NO7	False	4.2339	0.000697268	0.0460352	4.2339	Platensimycin|C20132	9.56432	13.3045	12.5565	7.33107	14.2305	9.56729	11.7721	16.866	16.2015	15.1406	16.6963	13.4392	14.7657	14.8544
X68957	-1.22524	-0.425351	-0.870519	0.250695	-0.423187	-1.11487	-1.62291	0.602449	-0.375466	0.921978	0.6576	0.790603	1.49938	1.33484	651.347	20.34	C29H46N8O9	False	1.07997	0.000698433	0.0460439	1.07997	L-Seryl-L-lysyl-L-phenylalanylglycyl-L-valyl-L-asparagine	14.2635	14.8202	14.5104	15.2907	14.8217	14.3404	13.9868	15.5355	14.8549	15.7579	15.5739	15.6664	16.1597	16.0452
X11873	1.43619	1.59693	0.826345	0.752427	0.346912	0.918243	0.113834	-0.53272	-0.814703	-0.838999	-1.28726	-0.751495	-1.48684	-0.278869	200.2	44.902	C12H25NO	False	0.68992	0.000703391	0.0462555	-0.68992	(2R,3S)-clavaminol B	18.5323	18.5971	18.2865	18.2567	18.0932	18.3235	17.9993	17.7387	17.625	17.6152	17.4345	17.6505	17.3541	17.841
X8247	1.50757	1.0228	0.503935	0.157097	1.14852	0.145492	0.644932	-1.31549	-1.85853	0.11945	-0.34256	-0.32842	-1.48836	0.0835531	166.051	34.941	C5H10N3P	False	6.50411	0.000703719	0.0462555	-6.50411	2-Methyl-5-(propan-2-yl)-2H-1,2,4,3-triazaphosphole	17.8949	15.7439	13.4416	11.9026	16.3018	11.8511	14.0672	5.36845	2.95888	11.7356	9.68552	9.74827	4.6014	11.5763
X58700	0.826135	1.02909	0.38461	0.782795	0.883815	0.160294	1.10844	-0.939002	-0.808063	-1.19942	-0.00143535	-0.343811	0.399378	-2	560.298	20.524	C28H47O9S	False	2.49444	0.000706067	0.0462943	-2.49444	sodium (22E,24R,25R)-24-methyl-5alpha-cholest-22-en-3beta,5,6beta,15alpha,25,26-hexol 26-O-sulfate	15.598	15.9404	14.8531	15.5249	15.6953	14.4747	16.0742	12.6202	12.8411	12.1809	14.2019	13.6243	14.8781	10.3532
X74082	-1.05864	-0.829329	-1.12963	-1.101	-1.37634	0.0873376	0.181418	-0.167777	0.471146	1.73028	1.25331	1.27698	0.558752	0.103499	711.369	21.507	C38H56O11	True	1.79639	0.000706451	0.0462943	1.79639	reveromycin G	15.7255	16.0014	15.6401	15.6745	15.3433	17.1042	17.2173	16.7972	17.5659	19.0807	18.5069	18.5354	17.6713	17.1236
X54353	0.597696	-1.06022	-1.24934	-0.165647	-0.762354	-1.77462	-0.773477	-0.220501	1.23796	0.783558	1.03949	0.461664	1.35201	0.533783	525.329	36.072	C29H46N2O5	True	2.23021	0.000708414	0.0462943	2.23021	1-Benzyl hydrogen (2S-trans)-4-(tert-butoxy)-pyrrolidine-1,2-dicarboxylate, compound with dicyclohexylamine (1:1)	18.4792	15.9848	15.7002	17.3307	16.4329	14.9099	16.4162	17.2482	19.4426	18.7589	19.1439	18.2746	19.6142	18.3831
X80945	-0.633502	-0.669859	-0.783454	-0.883971	-1.31768	-0.115304	-0.7477	-0.727427	1.60814	1.54864	1.16118	1.11622	0.568349	-0.123626	860.399	20.147	C45H55N7O9	True	3.28317	0.000708464	0.0462943	3.28317	szentiamide	13.5739	13.4928	13.2394	13.0151	12.0477	14.7298	13.3191	13.3643	18.5741	18.4414	17.5772	17.4769	16.2548	14.7112
X35841	0.190223	-1.31124	-1.18857	-1.1427	-0.622011	-0.838576	-0.431314	-0.700915	0.681791	1.43192	1.50635	0.892415	0.807347	0.725279	382.207	20.641	C15H29N5O5	False	1.24774	0.000710462	0.0463148	1.24774	L-Lysyl-L-alanyl-L-alanyl-L-alanine	17.0027	15.7757	15.876	15.9135	16.3389	16.162	16.4948	16.2745	17.4044	18.0174	18.0782	17.5765	17.507	17.4399
X5650	0.500796	0.0167614	1.70835	0.0558329	0.0227209	1.5042	1.38109	-0.335299	-0.140958	-0.923076	-0.429256	-0.445689	-1.59835	-1.31712	137.045	12.813	C5H8NO2	True	2.18289	0.000711584	0.0463148	-2.18289	Cyclopentane, nitro-, ion(1-)	15.4399	14.7274	17.2177	14.7849	14.7361	16.9171	16.7359	14.2091	14.4952	13.3438	14.0708	14.0466	12.3497	12.7637
X63853	-0.700408	-1.01269	-0.85923	-0.487601	0.463463	-1.8748	-0.806916	0.165137	0.508225	1.36677	1.3791	0.370663	1.38704	0.101235	603.315	22.205	C33H46O10	False	1.46666	0.000713393	0.0463148	1.46666	12-(2,4-Undecadienoyl),13-Ac-(4beta,7beta,9alphabeta,12beta,13alpha)-7-Hydroperoxy-4,9,12,13,20-pentahydroxy-1,5-tigliadien-3-one	15.2239	14.9202	15.0694	15.4309	16.3558	14.0818	15.1203	16.0657	16.3994	17.2344	17.2463	16.2656	17.2541	16.0035
X62441	1.11005	0.66841	0.32296	-0.312064	1.06974	1.4935	0.952827	-0.143499	-0.843162	-0.177731	-2	-0.865816	-0.911972	-0.259765	591.368	32.282	C36H48N4O2	False	1.36017	0.000713585	0.0463148	-1.36017	1,2,3,4-tetrahydro-8-hydroxymanzamine A	16.3786	15.9823	15.6723	15.1025	16.3424	16.7227	16.2375	15.2538	14.626	15.2231	13.4951	14.6056	14.5642	15.1495
X28992	1.24432	-0.0316908	1.24035	0.93364	1.19725	0.23561	0.329425	-1.22601	0.807832	-0.658587	-1.57857	-1.27016	-0.605125	-0.618278	329.175	21.189	C17H27N2OP	False	3.31045	0.000713974	0.0463148	-3.31045	Phosphine oxide, benzyldipiperidino-	16.5755	13.7041	16.5666	15.8764	16.4696	14.3057	14.5168	11.0166	15.5933	12.2934	10.2232	10.9172	12.4138	12.3842
X69470	-0.208204	-1.02291	-0.637552	-1.34812	-1.1681	-0.768001	-0.101892	-0.710998	1.17667	1.07156	1.00601	0.952702	1.65947	0.0993485	656.366	20.112	C33H53NO12	False	1.57089	0.000718821	0.0465027	1.57089	zygadenine glucoside	15.9905	15.1381	15.5413	14.7978	14.9862	15.4048	16.1018	15.4645	17.4395	17.3296	17.261	17.2052	17.9447	16.3123
X18126	-1.2403	-1.09739	-1.35508	0.283312	-0.085568	-0.935942	-0.916646	1.31094	1.33539	1.44512	0.314296	-0.296586	0.810958	0.427491	251.127	47.785	C13H16N4	True	1.22979	0.000719136	0.0465027	1.22979	Benzenediamine, ar,ar'-methylenebis-	16.8931	17.0081	16.8007	18.1194	17.8225	17.138	17.1536	18.9465	18.9662	19.0545	18.1443	17.6526	18.5441	18.2354
X36389	-0.148166	-0.0962923	-0.659187	0.0249922	-1.69697	-1.63679	-1.02365	-0.390617	0.611209	1.26574	0.735205	0.785513	1.3946	0.834419	386.288	37.405	C20H37N5O	True	1.6822	0.000720002	0.0465027	1.6822	4-morpholin-4-yl-6-tridecyl-1,3,5-triazin-2-amine	17.31	17.3683	16.7354	17.5047	15.5684	15.6361	16.3256	17.0374	18.1639	18.8999	18.3033	18.3599	19.0448	18.4149
X77885	0.268438	0.126388	-1.80394	-1.91851	-1.1214	-0.264977	-0.420857	0.49409	0.861816	1.33213	0.906552	0.282645	0.724339	0.533282	772.38	26.07	C30H55N9O13	False	4.18844	0.000721251	0.046516	4.18844	L-Glutaminyl-L-seryl-L-valyl-L-threonyl-L-seryl-L-threonyl-L-lysine	12.059	11.6534	6.14253	5.81543	8.09112	10.5361	10.0911	12.7032	13.753	15.0957	13.8807	12.0995	13.3605	12.8151
X14592	0.855017	2	0.426351	-0.0746571	0.999711	0.953176	0.333554	-0.0736857	-0.899311	-1.04282	-0.13358	-1.17986	-1.49427	-0.682589	224.2	45.402	C14H25NO	False	0.965236	0.000723786	0.0465686	-0.965236	(Z,2E,4Z)-N-(2-methylpropyl)deca-2,4-dienimidic acid	16.228	16.9385	15.965	15.6576	16.3168	16.2882	15.908	15.6582	15.1516	15.0635	15.6214	14.9795	14.7866	15.2846
X64943	0.420667	-0.346613	-1.91941	-0.342168	-1.11452	-1.66534	-0.168417	0.152104	0.942018	1.29018	0.866398	0.260931	1.08138	0.542781	613.275	20.015	C33H39ClF2N4O3	False	3.92464	0.000725825	0.0465686	3.92464	SR144190	12.525	10.4728	6.26623	10.4847	8.419	6.94575	10.9494	11.8067	13.9194	14.8506	13.7172	12.0978	14.2922	12.8516
X16301	0.44849	2	0.0596174	1.12509	0.434607	0.363471	0.770449	-0.52815	-1.07816	-0.479034	-1.38262	-0.578502	-0.580701	-0.921999	237.184	42.737	C13H19N2O	True	0.92016	0.000726672	0.0465686	-0.92016	Bufotenidine|C13664	18.9612	20.0633	18.7355	19.3539	18.9531	18.9119	19.1481	18.3944	18.0752	18.4229	17.8985	18.3652	18.3639	18.1658
X58660	0.213886	0.207453	1.36983	1.57229	0.599295	0.81681	0.449043	-1.95332	-0.330679	-1.06861	-0.0216993	-0.622418	0.132825	-1.36471	559.78	19.476	C51H75N17O12	False	1.71591	0.000726832	0.0465686	-1.71591	w/o MS2:[Asn0-Gln1]-moroidin	11.3648	11.3574	12.6926	12.9251	11.8075	12.0573	11.6349	8.87553	10.7393	9.89172	11.0942	10.4042	11.2717	9.55161
X58845	0.0418077	-0.93172	0.139127	-0.55107	-0.897709	-1.47225	-1.62663	-0.548069	1.20053	0.705678	0.803636	1.04285	1.15358	0.940243	561.301	21.207	C25H42N6O7	False	1.36517	0.000727291	0.0465686	1.36517	YTKK	15.5812	14.7033	15.669	15.0466	14.734	14.2158	14.0766	15.0493	16.6261	16.1799	16.2682	16.4839	16.5838	16.3914
X33780	-0.136541	-1.64903	-0.208853	-0.335652	-1.07399	-0.707522	-1.22265	-0.653039	1.19322	1.0054	0.87687	1.42142	1.05814	0.432232	365.231	31.381	C20H30N4O	False	1.25178	0.000730838	0.0467285	1.25178	N-(4-Cyano-2,6-diethyl-2,3,6-trimethylpiperidin-4-yl)-N'-phenylurea	15.507	14.2647	15.4476	15.3435	14.737	15.038	14.6149	15.0828	16.5992	16.4449	16.3393	16.7866	16.4882	15.9742
X29901	-1.44894	-0.202524	-0.372198	-0.63545	-1.69421	-0.64691	-0.612759	1.55281	0.998232	-0.0989295	0.377035	1.15913	1.27596	0.348758	335.218	46.267	C15H30N2O6	True	0.863584	0.000735016	0.0469283	0.863584	N~1~,N~1~,N~3~,N~3~-Tetrakis(2-hydroxypropyl)propanediamide	18.0576	18.7288	18.6374	18.4956	17.9255	18.4895	18.5079	19.674	19.3754	18.7846	19.0409	19.462	19.5249	19.0256
X66463	0.330803	-0.587096	-1.94438	-0.112344	-1.47796	-0.529308	-0.811829	-0.0572788	0.567757	1.52239	0.783098	1.27099	0.847336	0.197821	627.268	19.518	C34H40N2O8	False	3.87275	0.00073754	0.0470221	3.87275	Araliopdimerine B	11.5081	9.08379	5.49901	10.3377	6.73091	9.23642	8.49024	10.4831	12.1339	14.6552	12.7027	13.9913	12.8723	11.1569
X23719	1.62141	1.21867	0.313357	-0.0223334	1.4737	0.752991	-0.212237	-1.19464	-0.744616	-1.41364	-0.441004	-0.440367	-1.23659	0.325305	292.26	44.545	C17H35NO	True	2.99479	0.000741385	0.0471997	-2.99479	Oxime-Heptadecanal	18.2875	17.4671	15.623	14.9391	17.9866	16.5185	14.5523	12.5511	13.4678	12.105	14.0863	14.0876	12.4656	15.6473
X49391	-0.103804	-0.669828	-0.583167	-0.853564	-1.30876	-1.67483	-0.00461259	-0.398559	0.918852	1.27863	1.41314	1.21124	0.912696	-0.137429	485.276	20.451	C25H34N8O	False	1.89053	0.000751608	0.0477823	1.89053	Acetamide, N-[2-[(1-butyl-4,5-dicyano-1H-imidazol-2-yl)azo]-5-(dibutylamino)phenyl]-	16.4627	15.7422	15.8525	15.5084	14.929	14.463	16.5889	16.0875	17.7644	18.2223	18.3935	18.1365	17.7565	16.4199
X64032	-0.932786	0.38567	-0.583171	-0.875838	-0.718627	-0.864265	-1.80034	0.06394	-0.223423	1.12384	1.30474	0.935046	0.882658	1.30254	605.31	20.682	C35H42N4O4	False	1.1087	0.000757128	0.0480647	1.1087	scutianine-B	14.9008	15.8501	15.1526	14.9418	15.055	14.9502	14.2762	15.6185	15.4116	16.3816	16.5119	16.2457	16.208	16.5103
X29128	-0.254325	-0.650109	-0.98784	-1.51087	-0.76006	-0.678805	-0.854783	-0.111055	0.810951	1.85203	-0.0164632	1.20582	0.881031	1.07448	330.194	20.61	C16H28ClN3O2	False	0.801285	0.000759397	0.0480831	0.801285	Urea, 3-(2-(diethylamino)ethyl)-1-methyl-1-(2-phenoxyethyl)-, hydrochloride	16.4538	16.259	16.0927	15.8352	16.2049	16.2449	16.1582	16.5244	16.9783	17.4908	16.5709	17.1727	17.0128	17.108
X35597	-0.265845	-0.764738	0.159635	-1.85774	-1.09844	-0.637208	-0.695487	0.464846	1.23756	0.698222	1.58596	1.3265	-0.430009	0.276745	380.22	19.489	C22H31NO3	False	2.39719	0.000759576	0.0480831	2.39719	Oxybutynin|C07360	19.0181	18.2068	19.7099	16.4296	17.6642	18.4142	18.3195	20.2062	21.4627	20.5857	22.0292	21.6073	18.7511	19.9004
X47875	0.471286	-0.020296	-1.33889	-1.48027	-0.464153	-1.17567	-1.11206	-0.199757	0.713246	1.51999	1.33442	0.181508	0.622135	0.948516	473.326	49.553	C29H44O5	False	4.18957	0.000762445	0.0481481	4.18957	5'-hydroxy-6'-(hydroxymethyl)-2',3,6',11',15'-pentamethyl-5-propanoylspiro[oxolane-2,14'-tetracyclo[8.7.0.0??,?.0????,???]heptadecan]-1'(10')-en-12'-one	14.2726	12.8647	9.08831	8.68343	11.5935	9.55577	9.73795	12.3507	14.9655	17.276	16.7445	13.4426	14.7046	15.6393
X76584	-0.482392	-0.180501	-0.932264	-0.868057	-0.798649	-1.37017	-0.508989	-0.733428	0.569574	1.44319	1.39225	1.3085	1.3113	-0.150365	750.412	21.336	C37H57N7O8	True	2.87469	0.000762763	0.0481481	2.87469	Heterophyllin A	11.8306	12.4214	10.9501	11.0758	11.2116	10.0931	11.7785	11.3393	13.8893	15.5991	15.4994	15.3355	15.341	12.4804
X61133	0.102061	0.170168	-1.95966	-0.74578	-0.680187	-0.457607	-1.54517	0.17798	-0.125356	1.04391	1.03741	0.602162	0.970671	1.40939	580.98	21.849	C16H4N8O17	False	4.449	0.000767501	0.0483497	4.449	3,4-Dinitro-2,5-bis(2,4,6-trinitrophenyl)furan	11.2237	11.431	4.94866	8.64322	8.84286	9.5203	6.21022	11.4548	10.5315	14.0903	14.0705	12.7458	13.8674	15.2027
X34525	0.238199	-0.464965	-1.11434	-0.729399	-0.950216	-1.53525	-0.574429	-0.619209	0.138201	1.34225	1.17217	1.20863	1.46453	0.42382	371.233	22.459	C22H27NO3	False	3.25164	0.000768127	0.0483497	3.25164	Spiredine|C08711	17.1981	15.6383	14.1978	15.0517	14.5618	13.2641	15.3955	15.2961	16.9763	19.6472	19.2699	19.3508	19.9185	17.6099
X77636	-1.42418	-0.00406536	-0.761507	0.0578096	-0.910677	-2	-0.0025647	0.864843	0.415946	1.09768	0.910958	1.33092	0.617529	-0.0847147	768.366	19.244	C41H50O13	False	2.46583	0.000769277	0.0483538	2.46583	w/o MS2:NCGC00385005-01!	10.0026	12.381	11.1124	12.4846	10.8626	8.85739	12.3835	13.8362	13.0844	14.2262	13.9134	14.6168	13.422	12.2459
X371	0.00831079	0.40489	0.822943	1.21029	1.16174	0.410394	1.16061	0.351997	0.316039	-1.29256	-1.8	-1.07431	-0.586722	-1.09361	71.0294	6.672	C2H2N2O	False	2.02795	0.000770489	0.0483618	-2.02795	1,2,5-Oxadiazole	15.1757	15.7192	16.2922	16.823	16.7565	15.7268	16.7549	15.6467	15.5975	13.393	12.6975	13.6921	14.3603	13.6656
X11022	1.6972	0.493598	1.7308	0.200335	1.46701	-0.244892	-0.0764245	-0.399146	-0.655548	-1.14721	-0.983926	-1.14423	-0.476911	-0.460649	193.085	41.205	C5H15N4O3P	True	1.41524	0.00077194	0.0483847	-1.41524	Phosphoagmatine|C02726	16.8194	15.6876	16.851	15.4119	16.603	14.9932	15.1516	14.8482	14.6071	14.1447	14.2983	14.1475	14.775	14.7903
X36095	-0.215926	0.0672656	1.48386	1.55977	-0.101229	1.32018	1.07578	0.281665	-0.749944	-1.0223	-1.21575	-0.507551	-1.10886	-0.866959	384.221	23.383	C15H31N5O5	True	1.89595	0.000774301	0.0484195	-1.89595	Leucylnegamycin	18.2164	18.5785	20.3898	20.4869	18.363	20.1805	19.868	18.8526	17.5336	17.1853	16.938	17.8435	17.0746	17.3839
X58485	-0.446133	-2	-0.471422	-0.0654727	-0.660847	-0.388841	-1.15253	-0.0575938	0.820587	1.9094	0.539936	1.06915	-0.000220904	0.91836	558.305	24.969	C31H43NO8	False	1.80303	0.000774668	0.0484195	1.80303	Stephanthraniline A	13.9098	12.0065	13.8791	14.3718	13.6492	13.9794	13.0525	14.3814	15.4472	16.7687	15.1066	15.7489	14.451	15.5659
X78058	0.495666	-0.220171	-1.29075	-1.68759	-0.381814	-1.70654	-0.366385	0.187125	1.11866	1.08267	1.05397	0.508633	1.07419	0.132341	775.421	25.117	C40H64O13	False	2.30539	0.000779098	0.0486282	2.30539	14-(1-{6-[(3,5-dihydroxy-4-methoxy-6-methyloxan-2-yl)oxy]-5-methyloxan-2-yl}ethyl)-2,15-dimethyl-5-{[3,4,5-trihydroxy-6-(hydroxymethyl)oxan-2-yl]oxy}tetracyclo[8.7.0.0??,?.0????,???]heptadec-9-en-8-one	11.9833	10.8634	9.18856	8.56772	10.6106	8.53807	10.6347	11.5006	12.958	12.9017	12.8568	12.0036	12.8884	11.4149
X4346	1.55632	1.11657	0.559149	0.494617	0.959745	0.808507	-0.394128	-1.32175	-0.142674	-1.03947	-0.727391	-1.0603	-1.457	0.647811	120.981	10.814	C3H2N2S	False	6.76785	0.00078513	0.0489361	-6.76785	2H-Imidazole-2-thione	17.4985	15.4564	12.8678	12.5681	14.7281	14.0258	8.44087	4.13307	9.6086	5.44397	6.89323	5.34724	3.50501	13.2795
X11225	-0.39006	0.59526	-0.473515	-1.3869	-0.414346	-1.66277	-1.37456	0.214971	0.248047	1.34081	1.60218	0.765389	0.57737	0.358134	195.017	5.538	C5H7ClN2O4	True	4.6551	0.000790316	0.0491905	4.6551	(S)-amino-((5R)-3-chloro-4c-hydroxy-4,5-dihydro-isoxazol-5r-yl)-acetic acid	9.71382	12.8574	9.44757	6.53353	9.63634	5.65343	6.5729	11.6441	11.7496	15.2359	16.0698	13.4001	12.8003	12.1008
X23543	0.30053	0.927029	-0.31125	1.41406	0.667892	1.54264	0.879339	-0.256937	-1.25071	0.152576	-0.914104	-0.853215	-0.650122	-1.64772	291.173	21.384	C19H24O	False	1.03567	0.00079345	0.0493001	-1.03567	3-Methoxyestra-1,3,5(10),16-tetraene|C15107	14.5004	14.9193	14.0912	15.245	14.746	15.331	14.8874	14.1275	13.4629	14.4014	13.6881	13.7288	13.8646	13.1974
X63716	-0.120361	-0.737849	-0.363401	-1.69558	-0.801728	0.0451324	-1.48075	-0.175613	1.21583	1.53348	1.2564	0.612264	-0.158202	0.870376	602.308	20.439	C32H39N7O5	False	2.25724	0.000795521	0.0493001	2.25724	CHEMBL256467	15.082	14.1356	14.7095	12.6677	14.0377	15.3357	12.997	14.9974	17.13	17.6169	17.1922	16.2049	15.024	16.6005
X80637	0.0962841	-0.810014	-1.82105	-0.113535	-1.05479	0.200193	-1.59798	0.0711372	0.48185	1.37007	0.592795	0.823559	0.331249	1.43023	848.46	21.851	C38H61N11O11	False	5.43727	0.000796234	0.0493001	5.43727	L-Glutaminyl-L-prolyl-N~5~-(diaminomethylidene)-L-ornithyl-L-phenylalanyl-L-threonyl-L-leucyl-L-serine	13.9556	10.5744	6.80239	13.1728	9.66118	14.3433	7.63463	13.8618	15.3941	18.7079	15.808	16.6689	14.8322	18.9323
X62525	0.402227	0.712008	1.23781	0.849561	0.411885	1.21813	0.292606	-0.00105327	-0.0940431	-2	-0.891923	-1.77983	-0.466484	0.140987	592.274	20.689	C29H39N5O7	False	3.04856	0.000798291	0.0493001	-3.04856	Boc-D-Phe-Ala-Nle-p-nitroanilide	11.7301	12.3751	13.47	12.6616	11.7502	13.429	11.5018	10.8904	10.6967	6.66167	9.03536	7.1865	9.92123	11.1861
X10619	1.44257	1.49745	1.25096	-0.31071	1.15458	0.5044	-0.28293	-0.35331	-0.850382	-0.76759	-1.18869	-1.26834	-0.936528	0.108518	189.09	43.545	C7H13ClN4	True	1.41962	0.000799268	0.0493001	-1.41962	4-(2H-1,2,3-Triazol-2-yl)piperidine--hydrogen chloride (1/1)	17.4791	17.531	17.298	15.8218	17.2069	16.5923	15.848	15.7815	15.3116	15.3899	14.9919	14.9166	15.2302	16.2181
X44476	1.5295	1.53977	-0.423681	-0.199655	1.02615	0.755932	0.888579	-0.807482	-0.687327	0.0940405	-0.736794	-0.44528	-1.80166	-0.732098	448.242	36.296	C21H35N3O6	False	3.37081	0.00080188	0.0493001	-3.37081	Methyl (5S,8S,10aR)-5-[(tert-butoxycarbonyl)amino]-3-(3-methylbutanoyl)-6-oxodecahydropyrrolo[1,2-a][1,5]diazocine-8-carboxylate	17.1675	17.1912	12.6638	13.1804	16.0069	15.3838	15.6896	11.7789	12.0559	13.8576	11.9419	12.614	9.4865	11.9527
X22431	1.98972	-0.355763	0.42892	0.794849	0.704104	1.27752	0.607067	-0.751716	-0.584913	-1.03716	-1.61408	-0.370638	-0.921474	-0.166439	283.116	38.355	C12H20O6	True	0.995949	0.000802004	0.0493001	-0.995949	PUBCHEM_53438415	17.5978	16.0966	16.5988	16.833	16.7749	17.1419	16.7128	15.8432	15.95	15.6605	15.2913	16.0871	15.7345	16.2178
X51364	-0.584582	0.287587	0.338941	-1.80344	-0.585838	-1.73435	-1.02472	0.404041	0.442769	0.163968	1.40053	0.780838	0.863542	1.05071	501.338	20.11	C29H50O3S	False	4.19202	0.000802094	0.0493001	4.19202	Octadecyl (((4-hydroxy-3,5-dimethylphenyl)methyl)thio)acetate	10.0168	12.5228	12.6704	6.51472	10.0132	6.71325	8.7522	12.8574	12.9687	12.1676	15.7206	13.9401	14.1777	14.7155
X60955	-1.73324	0.130029	-0.0872303	-0.58337	-0.773351	-1.86303	-0.239568	1.40921	-0.0408837	1.11139	0.595578	1.12675	0.796827	0.15089	579.301	25.199	C27H46O13	False	2.29779	0.000802688	0.0493001	2.29779	(2R,3R,5R,7R,10S)-atractyloside G 2-O-beta-D-glucopyranoside	11.0497	13.9595	13.6202	12.8454	12.5487	10.847	13.3823	15.9571	13.6926	15.4921	14.6865	15.516	15.0008	13.9921
X44821	-0.470172	-0.764315	0.0859719	-0.652599	-0.801351	-2	-0.54272	0.953774	1.39819	1.41336	1.11377	-0.0310053	-0.163307	0.554818	450.717	22.665	C8H6Br4O2	False	1.48609	0.000803138	0.0493001	1.48609	Di-Me ether-Tetrabromo-1,4-benzenediol,9CI	13.8495	13.5575	14.4016	13.6684	13.5207	12.2371	13.7775	15.263	15.7042	15.7193	15.4219	14.2854	14.1541	14.867
X38948	-0.607854	-0.0689879	0.406029	-1.12105	-0.726975	-1.25544	-1.84163	0.432521	0.634524	0.46002	1.59315	1.05396	-0.0770733	1.11881	406.241	19.682	C23H35NO3S	False	1.60309	0.000807361	0.0494259	1.60309	(2S)-2-[2-(Acetylsulfanyl)phenyl]propanoic acid--N-cyclohexylcyclohexanamine (1/1)	14.0194	14.599	15.11	13.4673	13.8912	13.3228	12.6922	15.1385	15.3558	15.1681	16.387	15.807	14.5903	15.8768
X58090	-0.289115	0.279203	-2	-0.20824	-1.17372	-0.857516	-0.483078	0.593855	0.0184362	1.25933	0.696262	0.788553	1.22662	0.521484	555.324	23.716	C36H38N6	False	4.20062	0.000807407	0.0494259	4.20062	1,4-Piperazinedipropanamine, N,N'-di-9-acridinyl-	12.302	13.9388	6.3026	12.5349	9.7541	10.6648	11.7433	14.8451	13.1878	16.7618	15.1401	15.4059	16.6676	14.6367
X22193	-0.806982	-0.297413	-1.09223	-0.108588	-0.538105	-2	-0.285414	0.977882	0.0398969	1.9385	0.843169	0.513825	0.605005	0.335405	281.172	21.722	C12H20N6O2	False	1.41509	0.00080952	0.0494495	1.41509	1,3-Propanediol, 2-((4,6-bis(1-aziridinyl)-s-triazin-2-yl)amino)-2-ethyl-	13.3791	13.8595	13.1102	14.0375	13.6326	12.1366	13.8708	15.0617	14.1775	15.9673	14.9347	14.6243	14.7102	14.4561
X50626	0.451899	-0.635577	-1.60304	0.436927	-1.32343	-1.46629	-0.962607	0.231716	0.738262	1.33939	0.131616	0.741614	0.939496	0.98002	496.222	18.496	C22H33N5O6S	False	4.36692	0.000810552	0.0494495	4.36692	Cephradine lysinate	12.7005	9.44277	6.54457	12.6556	7.38221	6.95423	8.4631	12.0409	13.5583	15.3591	11.741	13.5684	14.1612	14.2825
X54208	-1.5796	-0.105402	0.166445	-0.304952	-0.440562	-1.59522	-1.34624	0.653434	0.209095	0.0954544	1.81754	0.906788	0.929296	0.593923	524.296	22.41	C24H46NO9P	False	1.65769	0.000812071	0.0494495	1.65769	2-amino-3-{[(2R)-2-hydroxy-3-(octadecanoyloxy)propyl phosphonato]oxy}propanoate	13.0487	14.6918	14.9948	14.4694	14.3182	13.0313	13.3088	15.5376	15.0423	14.9156	16.835	15.8199	15.845	15.4712
X5793	0.332169	-1.40044	-1.0374	-0.680633	-0.493269	-1.11866	-0.899996	-0.468458	0.873288	1.0383	1.43907	0.102893	1.52215	0.790985	138.127	36.838	C9H17NO	True	1.26332	0.00081223	0.0494495	1.26332	N-Methylpelletierine|C06184	17.7745	16.3286	16.6316	16.9293	17.0857	16.5638	16.7462	17.1064	18.2261	18.3638	18.6983	17.5832	18.7676	18.1574
X23398	0.684484	1.91118	0.319749	1.2234	0.0379626	0.120604	1.2569	-0.651136	-1.03912	-0.72689	-1.3301	-0.455907	-0.058233	-1.2929	290.195	42.39	C13H25N5O	True	0.881465	0.000814557	0.0495235	-0.881465	6-ethoxy-2-N,2-N,4-N,4-N-tetraethyl-1,3,5-triazine-2,4-diamine	17.3667	18.0481	17.1641	17.666	17.0076	17.0535	17.6847	16.6248	16.4093	16.5828	16.2477	16.7333	16.9542	16.2684
X48537	-0.93001	-0.765921	-0.0936706	-1.29973	-0.395208	-1.83251	-0.293083	0.089028	0.0952625	0.83459	1.5828	0.931284	0.980375	1.0968	478.782	21.5	C9H16Br4O	False	0.839111	0.00081603	0.0495385	0.839111	1,1,3,3,-tetrabromo-2-nonanol	14.5414	14.6273	14.9793	14.3479	14.8214	14.069	14.8749	15.0749	15.0782	15.4652	15.8569	15.5158	15.5415	15.6025
X21247	0.562449	1.24867	-0.114916	0.806188	1.49323	-0.248115	1.35255	-0.0812116	-0.772517	-0.712732	-1.23184	-1.12314	0.347661	-1.52629	274.974	6.764	C10H8N2S3	False	4.35484	0.000817027	0.0495385	-4.35484	2-[(1,3-Benzothiazol-2-yl)sulfanyl]ethyl thiocyanate	14.5578	16.6087	12.5335	15.2863	17.3396	12.1354	16.9191	12.6342	10.5682	10.7469	9.19548	9.52033	13.9159	8.31548
X43829	-0.103616	-0.807131	-0.501597	-1.0629	-1.10365	-1.67915	0.0725553	-0.323127	0.57029	1.11223	1.58758	1.28579	1.03287	-0.0801499	442.763	20.845	C10H4Cl8O	False	1.78908	0.000819039	0.049593	1.78908	Oxychlordane|C18146	15.999	15.1494	15.5184	14.8406	14.7914	14.0964	16.2117	15.7339	16.8127	17.4671	18.0412	17.6767	17.3713	16.0273
X82270	0.780364	-1.1241	-1.74496	-0.801127	-1.31976	0.0416714	-0.937834	0.00445347	0.710537	0.757057	0.49794	0.769063	0.960087	1.4066	921.435	22.877	C49H58N10O7	True	3.68258	0.000820412	0.0496088	3.68258	L-Tyrosyl-D-tryptophyl-L-alanyl-L-tryptophyl-D-phenylalanyl-L-lysinamide	13.2975	8.48986	6.92256	9.30518	7.99595	11.4328	8.96008	11.3388	13.1213	13.2387	12.5846	13.269	13.7512	14.8784
X63749	-0.726066	0.11664	-1.58258	-0.644861	-0.456917	0.00587406	-1.85373	0.266832	-0.0404002	1.47646	1.25023	1.02987	0.163385	0.995257	602.385	20.895	C35H53O8	True	2.32874	0.000821592	0.0496128	2.32874	1-[(3Z)-2,4-dioxooxolan-3-ylidene]-2-{2-[(1E)-3-hydroxy-2-{6-[(1Z)-3-[5-(1-methoxyethyl)-3-methyloxolan-2-yl]but-1-en-1-yl]-3-methyloxan-2-yl}prop-1-en-1-yl]-6-methylcyclohexyl}propan-1-olate	12.0743	13.4102	10.7165	12.203	12.5009	13.2346	10.2867	13.6482	13.1612	15.5658	15.2071	14.8578	13.4843	14.803
X43345	-1.21139	-1.37149	-0.11328	-1.47657	-0.53002	-0.206897	-1.0478	0.388046	1.23915	0.774747	0.381154	1.16117	0.667121	1.34606	439.29	25.019	C22H46O4S2	False	0.679524	0.000823693	0.0496724	0.679524	Ethane, 1,2-bis(decylsulfonyl)-	14.4151	14.3511	14.8534	14.3092	14.6871	14.8161	14.4804	15.0536	15.3934	15.208	15.0508	15.3622	15.165	15.436
X24369	0.355855	1.76775	-0.288203	0.472005	1.40413	0.59016	1.01818	0.454198	-0.654227	-0.780534	-1.16789	-0.825211	-1.02283	-1.32338	297.132	41.936	C12H12N10	False	1.19419	0.000827192	0.049816	-1.19419	1,3,5-Triazine-2,4-diamine, 6,6'-(1,3-phenylene)bis-	15.3531	16.4624	14.8471	15.4444	16.1767	15.5372	15.8735	15.4304	14.5595	14.4603	14.1559	14.4252	14.2699	14.0338
X43630	-1.42343	-0.536111	-0.737328	-1.46229	-0.253584	-0.265672	-0.598924	1.40865	1.34997	1.57442	0.507955	0.857878	-0.477759	0.0562224	441.257	20.39	C18H32N8O5	False	1.30335	0.000831888	0.0499056	1.30335	L-Seryl-L-alanyl-L-histidyl-L-lysinamide	14.9081	15.6751	15.5012	14.8745	15.9193	15.9089	15.6208	17.3561	17.3054	17.4994	16.5776	16.8801	15.7255	16.1871
X20998	-1.53008	-0.903206	-0.975202	0.398495	-0.180666	-1.25537	-0.786351	1.45392	1.12295	1.26675	0.00938667	-0.206434	1.12955	0.456257	273.108	47.824	C11H16N2O6	True	1.47167	0.000832	0.0499056	1.47167	1,3-Di-Me-Pseudouidine C	15.8573	16.4744	16.4035	17.7558	17.1857	16.1277	16.5894	18.7948	18.469	18.6105	17.3728	17.1603	18.4755	17.8127
X68909	0.692571	0.749212	0.989282	0.764706	0.200263	0.645807	1.05288	0.425589	-0.12383	-1.65665	-2	0.0178329	-0.533523	-1.16129	650.41	32.305	C40H48N4O3	False	4.40686	0.00083204	0.0499056	-4.40686	Geissospermine|C09200	15.5036	15.6751	16.4019	15.722	14.0131	15.362	16.5944	14.6953	13.032	8.39143	7.1617	13.4608	11.7916	9.89111
X56317	0.97332	0.767476	-0.0388297	1.13127	0.840688	0.283179	1.12674	-0.299949	-0.193961	0.64519	-1.50869	-1.70097	-0.587696	-1.43777	541.25	31.651	C33H35FN2O5	False	6.41443	0.00083863	0.0501594	-6.41443	Atorvastatin|C06834	16.1906	15.2816	11.7209	16.8881	15.6049	13.143	16.8682	10.5678	11.0359	14.7416	5.22995	4.38086	9.29712	5.54315
X60935	-1.00864	-0.0777516	-0.54411	-1.34397	-0.219053	0.182566	-2	0.253936	0.610503	1.2192	1.12828	1.05823	0.133559	0.801736	579.266	21.16	C27H46O9S2	False	1.59894	0.000839043	0.0501594	1.59894	(1R,3aS,3bS,5S,5aS,7S,9aR,9bS,11aS)-1-[(2S,3R)-3-hydroxy-6-methylheptan-2-yl]-9a,11a-dimethyl-7-(sulfonatooxy)-hexadecahydro-1H-cyclopenta[a]phenanthren-5-yl sulfate	11.7028	12.7036	12.2022	11.3423	12.5517	12.9834	10.4279	13.0602	13.4435	14.0979	14.0002	13.9249	12.9308	13.6491
X63602	0.21945	0.477148	0.932475	1.37029	0.241803	1.34775	0.659471	-0.482826	-0.891382	-2	-1.42177	-0.326747	0.3578	-0.435675	601.335	20.38	C27H53O12P	False	1.39314	0.000839817	0.0501594	-1.39314	[(2R)-2-hydroxy-3-(octadecanoyloxy)propoxy]({[(1S,2R,3R,4S,5S,6R)-2,3,4,5,6-pentahydroxycyclohexyl]oxy})phosphinic acid	14.7923	15.0317	15.4547	15.8615	14.813	15.8405	15.2011	14.1398	13.7603	12.6859	13.2675	14.2848	14.9208	14.1836
X51301	-0.331251	-0.308133	-0.787541	-0.986667	-0.822281	-1.34493	-0.527139	-0.813312	0.627822	1.40078	1.43865	1.24526	1.3358	-0.127072	500.944	21.336	C18H14N4S6	False	3.1232	0.000842136	0.0501594	3.1232	5,5'-Disulfanediylbis(3-benzyl-1,3,4-thiadiazole-2(3H)-thione)	12.2658	12.3153	11.2894	10.8632	11.215	10.0965	11.8466	11.2342	14.3183	15.9725	16.0535	15.6397	15.8334	12.7028
X38671	-0.970416	-2	-0.0884316	-0.471419	-1.12012	0.134433	-0.200758	1.03179	1.33907	0.631056	0.588657	0.691187	0.299544	0.585414	404.206	40.852	C21H27N5O2	True	1.88697	0.000842633	0.0501594	1.88697	BBR 2378	18.6788	16.7874	19.8062	19.3166	18.4874	20.091	19.6626	21.2381	21.6309	20.7258	20.6716	20.8027	20.3021	20.6675
X16687	1.27413	1.19565	0.230839	0.192251	0.807772	1.26903	0.119451	-1.16645	-1.09916	-1.81649	-0.181543	0.240348	-1.25833	0.192488	241.06	27.27	C9H15O4P	False	4.70336	0.000843024	0.0501594	-4.70336	Triallyl phosphate	17.4975	17.2436	14.1228	13.998	15.989	17.481	13.7625	9.60299	9.82065	7.50032	12.7889	14.1535	9.30581	13.9987
X64182	1.0746	1.31069	0.976983	0.470796	-0.0477109	0.58388	0.782601	-0.649229	-1.69382	-1.4849	-0.842483	0.65192	0.0346152	-1.16795	606.383	32.112	C31H51N5O7	False	2.04814	0.000844605	0.0501864	-2.04814	L-Threonyl-L-leucyl-L-phenylalanyl-L-leucyl-L-leucine	17.6289	17.9574	17.493	16.7887	16.0672	16.9461	17.2226	15.2303	13.7768	14.0675	14.9614	17.0407	16.1818	14.5085
X74703	-0.368256	-0.147982	-0.642085	0.240007	-1.43177	-1.83714	-0.903172	-0.320994	0.748348	1.31689	0.623387	1.23412	1.34219	0.14646	720.401	20.959	C37H61O12	False	4.36944	0.000846243	0.050213	4.36944	laidlomycin	13.2016	13.8633	12.3789	15.029	10.0065	8.78863	11.5945	13.3436	16.5562	18.2642	16.1808	18.0156	18.3403	14.7479
X28048	0.28698	1.47543	1.0593	0.628994	0.982262	1.13995	-0.420281	-0.0757009	-1.20345	-1.12382	-1.46847	-0.775618	-1.02067	0.515087	322.175	44.954	C15H21N7	True	2.02665	0.000847305	0.050213	-2.02665	1H-Pyrazole-1-ethanamine, N,N-bis[2-(1H-pyrazol-1-yl)ethyl]-	15.415	17.0511	16.4782	15.8858	16.3721	16.5892	14.4414	14.9157	13.3632	13.4729	12.9984	13.9522	13.6149	15.729
X36489	-1.04379	-2	0.0144001	-0.525807	-1.14134	0.135271	-0.244198	1.085	1.35062	0.532899	0.58845	0.676847	0.293892	0.654474	387.179	40.852	C21H24N4O2	True	1.72505	0.000852069	0.0504167	1.72505	1,3-Di(4-imidazolinophenoxyl)propane	18.3144	16.7614	19.5473	18.9179	18.2007	19.6881	19.246	20.7946	21.1041	20.1514	20.2161	20.3191	19.8729	20.293
X53316	-0.108642	-1.30917	-0.812087	-0.61413	-1.34884	-1.13027	0.221005	-0.475238	1.31349	1.31525	1.21482	1.20178	0.683947	-0.151918	517.286	19.443	C30H42N2O2S	False	3.21676	0.000854167	0.0504167	3.21676	Thiobinupharidine|C09990	15.471	12.8219	13.9188	14.3556	12.7343	13.2167	16.1985	14.6621	18.6092	18.6131	18.3915	18.3627	17.22	15.3755
X18864	-0.0205327	0.67715	0.624392	0.841194	1.75432	0.846966	0.448825	0.639166	-0.365372	-1.29342	-1.62852	-1.37045	-0.71183	-0.441896	257.067	28.141	C12H16O2S2	False	1.79865	0.00085428	0.0504167	-1.79865	2-(3,4-Dimethoxyphenyl)-1,3-dithiane	14.6669	15.5161	15.4519	15.7158	16.8271	15.7228	15.2382	15.4699	14.2472	13.1177	12.7098	13.0239	13.8255	14.1541
X9294	-0.124222	1.40727	0.997505	0.849617	1.04093	0.776488	0.265898	0.372637	-0.533479	-1.36745	-2	-0.873307	-0.466982	-0.30449	177.054	48.083	C8H6N3O2	True	1.52338	0.000855499	0.0504167	-1.52338	1,2,4-Triazolidine-3,5-dione, 1-phenyl-, ion(1-)	15.3215	16.8877	16.4687	16.3174	16.5131	16.2426	15.7204	15.8296	14.9029	14.05	13.3618	14.5554	14.9709	15.1371
X22447	0.532667	1.70177	0.0582703	0.666217	0.779296	1.69548	-0.118342	-0.38634	-0.961463	-0.550298	-1.3956	-0.876241	-1.32406	0.17864	283.15	45.906	C11H18N6O3	True	1.17825	0.00085849	0.0504167	-1.17825	1,3-Propanediol, 2-((4,6-bis(1-aziridinyl)-s-triazin-2-ylamino))-2-(hydroxymethyl)-	17.4022	18.3092	17.0341	17.5058	17.5935	18.3043	16.8971	16.6892	16.243	16.562	15.9062	16.3091	15.9617	17.1275
X7614	0.269159	-0.0820821	1.24494	1.96474	1.02645	-0.389657	1.18387	-0.414802	-0.766886	-0.32253	-0.896226	-1.55243	-0.516602	-0.747946	159.067	30.313	C8H6N4	True	1.49862	0.000858501	0.0504167	-1.49862	2-Cyanomethylimidazo(4,5-b)pyridine	17.4185	17.0654	18.3995	19.1231	18.1798	16.7562	18.3381	16.7309	16.3769	16.8237	16.2469	15.5872	16.6286	16.396
X50275	-1.13976	-2	0.074384	-0.269027	-1.46657	-0.256809	-0.174395	0.994727	1.45237	0.55829	0.477431	1.26387	0.263844	0.226423	493.276	21.36	C25H42O8	False	1.41164	0.00085898	0.0504167	1.41164	Gaudichaudioside B	16.9116	16.0955	18.057	17.7331	16.6032	17.7446	17.8223	18.9253	19.3571	18.5136	18.4373	19.1792	18.2358	18.2005
X47969	-0.718256	-0.650089	-0.615663	-1.29802	-1.35195	0.437156	-0.946815	0.125145	1.05428	1.4619	1.31775	1.20057	-0.573692	0.557697	474.251	20.178	C26H36ClN3O3	False	2.09036	0.000859794	0.0504167	2.09036	Propiophenone, 3-(3,3-dipropyl-1-azetidinyl)-, O-(p-methoxycarbaniloyl)oxime, hydrochloride	15.7833	15.8802	15.9292	14.9586	14.8819	17.4267	15.4582	16.9829	18.3045	18.8843	18.6792	18.5126	15.9889	17.5982
X66382	-0.312248	-2	-0.105441	-0.244861	-0.664731	-0.204085	-1.53564	0.0371871	1.65944	0.93313	0.823369	0.354066	0.24232	1.09292	626.365	47.172	C30H51N5O9	True	2.08803	0.000863986	0.0504716	2.08803	w/o MS2:NCGC00381061-01_C30H51N5O9_Pyrrolo[1,2-d][1,4,7,10,13,16]oxapentaazacyclononadecine-1,4,7,10,14,17(11H,16H)-hexone, 16-(2,3-dihydroxypropyl)dodecahydro-5,8,9,21-tetramethyl-6-(1-methylethyl)-3-(1-methylpropyl)-	13.8247	11.319	14.1186	13.9205	13.3238	13.9784	12.0861	14.3213	16.6268	15.5946	15.4386	14.7716	14.6128	15.8216
X59323	1.16041	0.723469	1.82625	0.202582	-0.370348	0.335556	1.30423	-0.312574	-0.549028	-0.776786	-0.664048	0.0356653	-1.69067	-1.22471	565.282	20.482	C34H38N4O5	False	1.69334	0.000864954	0.0504716	-1.69334	Aralionine A|C09999	14.7013	14.2016	15.4628	13.6059	12.9506	13.758	14.8658	13.0167	12.7463	12.4858	12.6148	13.415	11.4406	11.9735
X53606	0.99745	0.705922	0.420392	1.65876	-0.0940231	1.28591	0.13935	-1.71803	-1.15422	-0.303804	-1.07327	0.402513	-0.18401	-1.08294	519.271	19.983	C20H38N8O6S	False	2.64083	0.000865201	0.0504716	-2.64083	L-Glutaminyl-L-cysteinyl-N~5~-(diaminomethylidene)-L-ornithyl-L-leucine	14.5791	14.0522	13.5361	15.7744	12.6063	15.1005	13.0281	9.67098	10.69	12.2271	10.8364	13.5038	12.4437	10.8189
X62404	1.13314	-0.037524	-0.122585	1.5618	0.755496	0.383247	1.83138	-1.25249	-0.456581	-0.740533	-0.987271	-1.24234	-0.458337	-0.3674	591.297	20.472	C36H38N4O4	False	0.905961	0.000865259	0.0504716	-0.905961	methyl 3-[9,14-diethenyl-20-(3-methoxy-3-oxopropyl)-5,10,15,19-tetramethyl-21,22,23,24-tetraazapentacyclo[16.2.1.1??,?.1?,????.1????,???]tetracosa-1,3,5,7,9,11(23),12,14,16,18(21),19-undecaen-4-yl]propanoate	15.2706	14.5963	14.5473	15.5175	15.0531	14.8387	15.6728	13.8965	14.3549	14.1914	14.0493	13.9023	14.3539	14.4063
X70753	-1.67509	-0.461837	-0.167826	-0.0961029	-0.727593	-1.34458	-0.646211	0.345577	1.02509	0.640283	0.933421	1.19019	1.68307	-0.698399	671.342	21.247	C36H48N4O7	False	2.47685	0.000868114	0.0505719	2.47685	Benzyloxycarbonylleucyl-leucyl-leucyl-4-methyl-coumaryl-7-amide	12.1579	14.2124	14.7103	14.8318	13.7624	12.7176	13.9002	15.5797	16.7304	16.0788	16.5752	17.01	17.8447	13.8118
X20340	1.77517	-0.0103179	0.550594	0.501937	0.860129	1.38625	0.260629	-0.714502	-1.36298	-0.329599	-1.29318	-0.383749	-1.48577	0.245384	268.13	37.671	C12H17N3O4	True	1.14906	0.00087112	0.0506808	-1.14906	Agaritine|C01550	17.5081	16.1595	16.5831	16.5464	16.817	17.2144	16.3641	15.6276	15.1378	15.9183	15.1905	15.8774	15.045	16.3526
X46083	-0.336668	-0.67963	-0.641285	-1.03722	-1.23508	-1.49587	0.274582	-0.381415	0.62983	1.46327	1.53187	1.20855	0.776351	-0.0772943	460.27	20.78	C27H33N5O2	False	1.94266	0.000873459	0.0507161	1.94266	Pyrrolidine, 1-((4-((1-(3-oxo-3-phenylpropyl)-1H-benzimidazol-2-yl)methyl)-1-piperazinyl)acetyl)-	16.3042	15.8515	15.9021	15.3795	15.1184	14.7741	17.111	16.2452	17.58	18.6801	18.7706	18.3438	17.7734	16.6466
X9177	0.932027	0.911475	1.85989	0.510003	1.14195	0.534343	-0.113751	-0.622695	-0.338387	-1.26672	-1.35198	-0.995877	-1.00753	-0.192729	175.147	42.641	C13H20O	False	0.7358	0.000874004	0.0507161	-0.7358	alpha-Ionone|C12286	17.0361	17.027	17.4498	16.8479	17.1297	16.8588	16.5698	16.3429	16.4697	16.0558	16.0177	16.1765	16.1713	16.5346
X65242	-0.411586	-1.05189	-0.52102	-1.56266	-0.881977	-0.557999	-0.285433	-0.806567	0.405158	1.45559	1.58891	0.910909	0.665073	1.05349	616.323	21.718	C31H43N7O5	True	1.26827	0.000878461	0.0509085	1.26827	lucentamycin E	15.6754	15.1363	15.5833	14.7063	15.2794	15.5522	15.7816	15.3429	16.363	17.2474	17.3596	16.7888	16.5819	16.9089
X4931	1.42941	1.45683	-0.0467936	0.173839	1.10117	1.04645	-0.0851988	-1.30189	-1.31928	-1.19351	-0.46622	-0.188388	-1.07475	0.468322	128.143	36.186	C8H17N	False	5.02899	0.000879664	0.050912	-5.02899	N,N-Dimethylcyclohexylamine	17.4522	17.5473	12.3331	13.0982	16.314	16.1242	12.1999	7.98067	7.92035	8.35651	10.8786	11.842	8.76835	14.1194
X29548	0.418671	0.994721	0.864332	1.65987	0.450213	1.0479	0.0644123	-0.751115	-0.490919	-0.334981	-2	-1.11902	-0.733525	0.00798074	333.143	31.651	C12H29ClN2O2S2	False	0.9043	0.000881947	0.0509779	-0.9043	S-[2-(Diethylamino)ethyl] 2-(diethylamino)ethane-1-sulfonothioate--hydrogen chloride (1/1)	16.4863	16.8178	16.7428	17.2006	16.5045	16.8484	16.2825	15.8132	15.9629	16.0526	15.0493	15.6014	15.8233	16.25
X41746	-0.473675	-1.52431	-0.437228	-1.32265	-1.18513	0.170695	-0.444827	1.2911	1.48858	0.175927	1.56895	0.452807	-0.248123	0.487901	427.246	44.933	C24H36O5	True	1.44134	0.000896263	0.0517383	1.44134	Lovastatin|C07074	17.3801	16.3641	17.4153	16.5591	16.6921	18.0031	17.408	19.0865	19.2775	18.0082	19.3552	18.2759	17.5982	18.3099
X58948	-0.339184	-0.473346	0.171004	-1.54905	-0.516583	-0.390226	-1.9981	-0.0237719	0.689221	0.832073	1.37195	1.02652	-0.10637	1.30587	562.268	18.729	C32H37N2O7	False	2.87444	0.000900098	0.0518924	2.87444	Ac ????????Ajmalimine	12.646	12.3811	13.6533	10.2572	12.2957	12.5452	9.37064	13.2688	14.6765	14.9585	16.0245	15.3424	13.1057	15.894
X55881	-0.108366	-0.12002	0.0322822	-0.607469	-1.92838	-1.67749	-0.858253	0.333748	0.369357	0.558956	1.59491	0.891519	1.13496	0.384244	537.337	41.261	C28H50O8	False	1.25815	0.000902945	0.0519464	1.25815	Butyryl trihexyl citrate	19.3274	19.3176	19.4449	18.9102	17.8059	18.0157	18.7005	19.697	19.7267	19.8852	20.7512	20.1632	20.3667	19.7392
X27821	1.2766	1.16962	0.709234	0.837679	1.24942	0.581297	-0.246579	-0.800891	-0.262283	-1.09104	-1.81169	-0.906008	-0.893697	0.188345	320.242	47.274	C20H33NS	False	0.836014	0.00090439	0.0519464	-0.836014	Benzyl dodecylmethanimidothioate	17.8387	17.7826	17.5411	17.6084	17.8245	17.4739	17.0396	16.7488	17.0314	16.5966	16.2185	16.6936	16.7001	17.2678
X62157	-1.63345	-0.901166	0.703487	-0.937734	-0.418944	-0.746115	-1.1503	1.08161	0.531714	0.127145	1.37607	1.14575	-0.322943	1.14488	589.263	19.09	C30H38N4O7	False	3.32649	0.000904678	0.0519464	3.32649	N-{[(9H-Fluoren-9-yl)methoxy]carbonyl}-L-valyl-L-alanylglycyl-L-valine	6.74963	8.42654	12.1011	8.3428	9.53081	8.7816	7.85602	12.967	11.7078	10.7813	13.6413	13.1139	9.75065	13.1119
X56015	0.104248	0.0939404	-0.833938	0.144211	-1.96081	-1.49091	-1.27634	0.162527	0.807395	0.974633	0.657082	0.877105	1.20425	0.536602	538.349	39.248	C31H49NO5	True	1.41772	0.000905696	0.0519464	1.41772	Ambruticin VS-1	19.2406	19.2308	18.3487	19.2786	17.2774	17.7241	17.9281	19.296	19.909	20.068	19.7661	19.9753	20.2863	19.6516
X51085	-1.52346	0.601084	-1.21882	-0.740449	-0.52435	-1.59603	-0.135422	1.25186	0.657055	1.60165	0.73365	0.432716	0.384667	0.0758509	499.25	20.959	C27H40O5S	False	1.9585	0.000911776	0.05216	1.9585	2-Hydroxy-3-phenoxypropyl 4-dodecylbenzene-1-sulfonate	14.4439	17.2786	14.8503	15.4886	15.7769	14.347	16.2959	18.1469	17.3533	18.6136	17.4555	17.0539	16.9898	16.5778
X33158	0.299774	-1.70827	-0.80418	-0.768956	-0.154903	-1.42335	-0.524366	-0.303176	1.35856	0.435819	1.22114	0.195572	1.53757	0.638762	360.273	34.948	C15H33N7O3	True	3.20398	0.000911977	0.05216	3.20398	3,3',3''-Nitrilotris[N-(2-aminoethyl)propanamide] (non-preferred name)	17.1547	12.7257	14.7198	14.7975	16.1519	13.3542	15.337	15.8248	19.49	17.4548	19.1869	16.9249	19.8848	17.9024
X56240	-0.192592	-0.148933	-0.724883	-0.61176	-1.67912	-0.989086	-0.815692	0.289578	0.66067	1.83542	0.977589	1.62936	0.0455943	-0.276144	540.283	18.737	C31H39N3O4	False	1.72586	0.000912932	0.05216	1.72586	7,7-Bis[4-(diethylamino)-2-ethoxyphenyl]furo[3,4-b]pyridin-5(7H)-one	15.6777	15.7288	15.0548	15.1872	13.9382	14.7457	14.9486	16.2419	16.6762	18.0508	17.047	17.8097	15.9564	15.5799
X27163	-0.141952	-0.0777467	-0.435476	-2	-0.681607	-0.843771	-0.302523	0.153249	0.924214	1.15883	1.2691	0.73295	0.258728	0.582454	316.18	20.083	C18H28ClN	False	3.3865	0.000916739	0.0523105	3.3865	Piperidine, 4-methyl-1-(1-phenylcyclohexyl)-, hydrochloride	13.6446	13.7944	12.9597	7.91721	12.3854	12.007	13.2699	14.3335	16.1324	16.6799	16.9372	15.6861	14.5796	15.335
X46566	-0.843837	0.161366	-1.6326	-0.377243	-0.676592	-0.287516	-1.67072	0.0780443	0.169189	1.20202	0.997359	0.943772	1.63245	0.304298	463.884	20.592	[C18H14Br2N3O2]+	False	1.1096	0.000920215	0.0524417	1.1096	w/o MS2:3-dihydro-7,8-dehydrodiscorhabdin C (+2)	14.6376	15.3704	14.0625	14.9777	14.7595	15.0431	14.0347	15.3096	15.3761	16.129	15.9798	15.9408	16.4428	15.4746
X38679	-0.132727	1.39329	0.850652	1.15338	0.840327	0.400352	0.631522	0.195333	-1.0408	-1.34936	-2	-0.403599	0.071292	-0.52809	404.218	43.127	C20H27N7O	True	1.92838	0.000922514	0.0525055	-1.92838	Piperazine, 1-((4-amino-6-piperidino-s-triazin-2-yl)methyl)-4-benzoyl-	16.4533	18.4583	17.7454	18.1431	17.7318	17.1537	17.4574	16.8843	15.2601	14.8547	13.8926	16.0974	16.7213	15.9338
X75239	-1.89856	-1.25709	0.719121	-0.436999	-0.532461	-0.809898	-0.854881	1.3897	0.957202	-0.0962109	1.01929	0.910594	0.0478042	0.842391	728.364	21.38	C39H53NO12	False	3.75121	0.000928715	0.0527615	3.75121	[(1R,2R,3R,4S,5S,7R,9S,10R,11S,13S,15R)-9,15-bis(acetyloxy)-4-(butanoyloxy)-7-hydroxy-5,9,12,12-tetramethyl-2-{[(2R)-2-methylbutanoyl]oxy}-8-oxotetracyclo[8.5.0.0^{3,7}.0^{11,13}]pentadecan-1-yl]methyl pyridine-3-carboxylate	5.73388	7.39479	12.5116	9.51817	9.271	8.55266	8.43619	14.2479	13.128	10.4005	13.2888	13.0074	10.7734	12.8308
X15512	-1.26614	-1.91887	-1.51643	-0.0363044	-0.392083	0.0377212	-0.636355	0.819658	0.656596	1.09833	0.936701	0.856158	0.743508	0.617518	231.133	28.786	C9H16N6	False	0.745778	0.000929378	0.0527615	0.745778	s-Triazine, 2,4-bis(methylamino)-6-(1-pyrrolidinyl)-	16.7673	16.4699	16.6533	17.3277	17.1656	17.3615	17.0543	17.7178	17.6435	17.8447	17.7711	17.7344	17.6831	17.6256
X28301	-0.262718	0.106163	1.00159	0.547226	1.17049	1.3438	1.20812	0.622986	-0.335208	-0.95968	-0.428533	-1.39533	-1.32147	-1.29743	324.158	23.797	C15H22ClN5O	False	2.18068	0.0009318	0.0528316	-2.18068	Piperidine, 1-(2-(5-(4-methoxyphenyl)-2H-tetrazol-2-yl)ethyl)-, monohydrochloride	14.1998	14.7503	16.0865	15.4084	16.3385	16.5971	16.3946	15.5215	14.0916	13.1598	13.9524	12.5096	12.6199	12.6557
X23787	-0.203803	1.03616	1.10325	1.73674	0.283883	0.778919	0.394152	0.705972	-0.868902	-0.643974	-1.00611	-0.816363	-1.66056	-0.839358	293.114	46.247	C12H19ClN4O	False	1.96225	0.000936903	0.0530534	-1.96225	Urea, N-((dimethylamino)iminomethyl)-N'-(2,6-dimethylphenyl)-, monohydrochloride	12.3583	14.0185	14.1084	14.9566	13.0113	13.6741	13.1589	13.5764	11.4678	11.7689	11.2841	11.5381	10.4078	11.5073
X63802	-1.07039	-0.196047	-1.52525	-0.602521	-1.20337	0.18358	-0.694976	0.502859	0.777437	1.67975	1.30903	1.12047	-0.627311	0.346746	602.823	20.248	C16H12Br2O11S2	False	2.21376	0.000943797	0.0533534	2.21376	Aplysillin A	14.5011	15.8271	13.8112	15.2106	14.2994	16.4028	15.0704	16.887	17.3034	18.6719	18.1096	17.8237	15.173	16.6503
X25464	-0.631692	-1.4441	-1.09286	-0.0858528	-0.715753	0.495935	-1.91257	0.544926	0.752792	1.211	0.159159	1.05962	0.683785	0.975604	304.211	26.516	C19H29NS	False	1.00274	0.000944595	0.0533534	1.00274	2-Dodecyl-1,3-benzothiazole	16.1885	15.6592	15.8881	16.5441	16.1337	16.9232	15.354	16.9551	17.0905	17.389	16.7037	17.2904	17.0455	17.2357
X44273	-0.253738	-1.44473	0.465651	-1.77858	-0.718498	-1.38631	0.0165381	0.639339	1.20973	0.193582	1.30041	1.10209	0.31546	0.339047	446.251	19.235	C23H37NO6	False	2.37307	0.000946215	0.0533773	2.37307	winkleridine	16.2974	14.3576	17.469	13.8139	15.5404	14.4528	16.7376	17.7519	18.6809	17.0259	18.8286	18.5056	17.2244	17.2628
X14400	1.68745	0.234765	0.531243	0.291848	0.857594	1.10224	0.351759	-1.61643	-0.994949	-0.177198	-1.36029	0.203272	-1.42528	0.313978	223.053	31.054	C12H11ClO2	True	4.47356	0.000953054	0.0536319	-4.47356	cis-2,3-Dihydro-2,3-dihydroxy-4'-chlorobiphenyl|C06585	18.6206	14.1227	15.0407	14.2994	16.0511	16.8086	14.485	8.39091	10.3152	12.8472	9.18401	14.0252	8.98277	14.368
X51763	0.876594	0.458662	0.13849	1.32611	0.505457	0.709061	1.12091	-1.02888	-0.00567205	0.69486	-0.455188	-1.64555	-1.08177	-1.61308	504.776	18.571	C13H9Br3O3S	False	1.84391	0.000954316	0.0536319	-1.84391	4-Methylbenzenesulfonyl-2,4,6-Tribromophenol,9CI,	13.5268	13.0015	12.5992	14.0917	13.0603	13.3162	13.8338	11.1321	12.418	13.2984	11.8531	10.3571	11.0656	10.3979
X15511	-0.859686	-1.77024	-1.66795	-0.142454	-0.394174	-0.197088	-0.801121	0.440011	0.889161	0.585745	0.693594	1.43638	0.991707	0.796108	231.133	28.873	C9H16N6	False	0.699664	0.000954486	0.0536319	0.699664	s-Triazine, 2,4-bis(methylamino)-6-(1-pyrrolidinyl)-	16.7175	16.3352	16.3782	17.0186	16.9129	16.9957	16.7421	17.2632	17.4517	17.3244	17.3696	17.6815	17.4948	17.4127
X50154	-0.239102	-1.37075	-0.479961	-1.50504	-1.09203	-0.459178	0.0687609	-0.276943	1.20612	1.18397	1.62192	1.16481	0.423315	-0.245895	492.237	20.896	C28H31N5O2	False	2.9287	0.000955542	0.0536319	2.9287	Piperazine, 1-(3-((1-methylethyl)amino)-2-pyridinyl)-4-((6-(phenylmethoxy)-1H-indol-2-yl)carbonyl)-	14.8718	12.5871	14.3855	12.316	13.1498	14.4275	15.4933	14.7954	17.7895	17.7448	18.629	17.7061	16.2091	14.8581
X3743	-1.05383	-0.905216	0.0953856	0.0395744	-1.55856	-1.91084	0.170937	0.936399	0.728636	0.408416	0.413642	1.1259	1.38605	0.123521	113.096	45.815	C7H14O2	True	1.96664	0.000957706	0.0536479	1.96664	Ethyl isovalerate|C12290	20.2832	20.4829	21.8274	21.7524	19.6049	19.1316	21.9289	22.9575	22.6783	22.248	22.255	23.2121	23.5617	21.8652
X70859	-0.127287	0.644638	1.11714	1.43782	-0.435166	1.3809	1.28575	-0.752894	-0.240233	-0.733185	-1.16263	-0.0307289	-0.921207	-1.46291	672.346	21.528	C34H49N5O7S	True	1.12938	0.000958235	0.0536479	-1.12938	(2S,5S,8S,11S,14S,15R)-4,17-dihydroxy-8-[(4-hydroxyphenyl)methyl]-2,6,9,14-tetramethyl-5,11-bis(propan-2-yl)-15-propyl-12-oxa-20-thia-3,6,9,16,21-pentaazabicyclo[16.2.1]henicosa-1(21),3,16,18-tetraene-7,10,13-trione	15.6812	16.2565	16.6087	16.8477	15.4518	16.8053	16.7343	15.215	15.5971	15.2297	14.9096	15.7532	15.0895	14.6858
X52864	0.101923	1.11025	1.86329	1.38406	-0.373998	0.964757	0.102019	-0.709361	-1.13805	-0.818821	-1.17575	-0.113018	-0.00379682	-1.19351	513.283	20.438	C29H38N4O3	False	1.68969	0.000959584	0.053656	-1.68969	(-)-(S)-verbamedine	15.6521	16.8095	17.6738	17.1238	15.1058	16.6425	15.6522	14.7209	14.2288	14.5952	14.1855	15.4054	15.5307	14.1652
X56706	0.905089	1.27852	-0.00380576	0.821848	0.0564825	0.83064	1.34752	-0.494396	-1.37365	0.336059	-1.26227	-0.0101341	-0.683519	-1.74839	543.81	22.212	C52H75N15O11	False	1.29301	0.000961763	0.0536773	-1.29301	w/o MS2:[Val9]-moroidin	14.128	14.4508	13.3425	14.0561	13.3946	14.0637	14.5104	12.9185	12.1586	13.6362	12.2548	13.337	12.755	11.8347
X38526	0.286161	1.70799	-0.292823	0.146685	1.67149	0.770302	0.796286	0.460064	-0.618849	-0.588241	-0.838546	-1.15832	-1.43929	-0.902905	403.174	40.702	C21H24N4O3	True	2.57882	0.000962374	0.0536773	-2.57882	1H-1,2,4-Benzotriazepine-3-carboxylic acid, 4,5-dihydro-5-oxo-4-phenyl-, 2-(diethylamino)ethyl ester, monohydrate	14.5361	17.0593	13.5086	14.2885	16.9945	15.3952	15.4413	14.8447	12.93	12.9843	12.5401	11.9727	11.4741	12.4259
X42544	1.01388	-0.165942	0.901453	0.0365846	0.628285	1.10004	1.8924	-1.25855	-0.593227	-0.961061	-0.845975	-0.942125	-1.16352	0.357763	433.229	20.394	C20H37N2O4PS	False	0.969012	0.000964855	0.0537485	-0.969012	Phosphorothioic acid, O,O-diethyl O-(6-(dodecyloxy)-3-pyridazinyl) ester	15.4498	14.7097	15.3793	14.8368	15.208	15.5039	16.0009	14.0244	14.4417	14.211	14.2832	14.2229	14.084	15.0383
X20860	-1.11712	-1.00624	-0.680945	-0.623697	-1.74043	-0.146169	0.148382	1.31505	1.76997	0.91011	0.336926	0.988953	0.0235698	-0.178355	272.163	33.302	C12H22ClN5	False	1.58143	0.000968312	0.0538406	1.58143	N,N-Diethyl-6-(piperazin-1-yl)pyrimidin-4-amine--hydrogen chloride (1/1)	14.4153	14.5341	14.8826	14.9439	13.7475	15.4556	15.7711	17.0211	17.5085	16.5872	15.9731	16.6717	15.6374	15.4211
X57099	0.272273	-0.49451	-2	0.390641	-1.61791	-0.96075	-0.628383	0.686886	0.633564	1.415	0.201964	0.704588	0.864846	0.561033	547.298	24.875	C27H44N2O8	False	3.15455	0.000970213	0.0538406	3.15455	bengazole B	12.7596	11.089	7.74548	13.0174	8.6416	10.0733	10.7974	13.6628	13.5467	15.2491	12.6064	13.7014	14.0506	13.3887
X34994	0.256545	0.463473	-1.09364	-1.98731	-0.843183	-1.18131	-0.672375	0.014558	0.721638	1.30466	1.27999	0.785149	0.681423	0.270386	375.181	18.771	C22H22N4O2	False	3.81146	0.000970417	0.0538406	3.81146	trigonoliimine C	12.8514	13.3971	9.29019	6.93313	9.95079	9.05896	10.4013	12.2131	14.0781	15.6158	15.5507	14.2456	13.972	12.8879
X72446	1.35114	0.80633	0.314998	0.0384264	0.973047	1.32591	0.241486	-1.13553	-1.38171	-1.54131	-0.646906	0.432598	-1.15656	0.378077	690.383	27.579	C35H57NO11	False	4.51072	0.000971342	0.0538406	-4.51072	Mycinamicin VI|C15682	16.6882	14.9854	13.4498	12.5854	15.5065	16.6093	13.2201	8.91631	8.14691	7.6481	10.4435	13.8174	8.85061	13.647
X76745	0.0546245	-0.332918	-1.0377	-1.34776	-0.408123	-1.88582	-0.244726	-0.363251	0.453908	1.27499	1.49975	0.807003	1.0613	0.468722	753.384	20.398	C40H58O12	False	1.39654	0.00097523	0.0538974	1.39654	(1S)-1-(acetyloxy)-1-[(2R,4R,5S)-4,5-bis(acetyloxy)-4-[(1R,3bR,4R,5aR,9aR,9bR,11aS)-4-(acetyloxy)-3b,6,6,9a,11a-pentamethyl-7-oxo-1H,2H,3bH,4H,5H,5aH,6H,7H,8H,9H,9aH,9bH,10H,11H,11aH-cyclopenta[a]phenanthren-1-yl]oxolan-2-yl]-2-methylpropan-2-yl acetate	14.6712	14.3071	13.6449	13.3536	14.2364	12.8481	14.3899	14.2786	15.0463	15.8178	16.0289	15.3781	15.617	15.0603
X31071	1.22853	0.270144	-0.113684	0.19358	1.1065	1.14612	1.21856	-0.855708	-0.797244	-0.611114	0.095917	0.304739	-2	-1.1323	344.138	40.974	C18H19N2O5	False	4.56505	0.000975615	0.0538974	-4.56505	3-(1-{1-[(Benzyloxy)methyl]cyclopent-2-en-1-yl}ethoxy)-2-diazonio-3-oxidoprop-2-enoate	14.4701	11.4377	10.2232	11.1954	14.0839	14.2093	14.4385	7.87543	8.06041	8.64934	10.8864	11.5471	4.08386	7.00027
X38405	0.866785	0.708926	1.54654	0.811634	1.2926	0.17962	-0.289131	-0.420947	-1.52642	-1.72693	-1.10807	-0.40709	-0.0716064	0.144098	402.21	19.798	C23H31NO3S	False	1.96413	0.000977038	0.0538974	-1.96413	ADP-916	17.4751	17.263	18.3883	17.401	18.0471	16.5519	15.9221	15.745	14.2599	13.9905	14.8219	15.7637	16.2144	16.5042
X25909	-0.095245	-1.37627	-0.883004	-0.679419	-0.566564	-0.87745	-0.782332	-0.489998	1.24457	2	0.987905	0.660875	0.0395996	0.708488	307.696	21.927	C36H49N5O8S	False	1.21125	0.000978607	0.0538974	1.21125	w/o MS2:MLS001401425-01!Indinavir Sulfate157810-81-6	16.767	15.7346	16.1321	16.2962	16.3872	16.1366	16.2133	16.4489	17.8468	18.5433	17.6399	17.3764	16.8757	17.4148
X46211	-0.697673	0.047377	-0.454709	-0.385341	-1.75154	-0.309272	-1.60963	-0.379408	0.266897	1.1656	1.34288	1.43857	0.857106	0.46914	461.242	21.252	C27H30N6	False	1.59497	0.000978657	0.0538974	1.59497	1,3-Propanediamine, N,N,N',N'-tetrakis(2-pyridinylmethyl)-	16.7184	17.5243	16.9812	17.0563	15.5785	17.1385	15.732	17.0627	17.7618	18.7339	18.9257	19.0292	18.4002	17.9805
X43631	-1.28596	-0.134372	-0.948889	-1.57761	-0.187788	-0.127359	-0.927294	1.33657	1.02313	1.54891	0.769214	0.790134	-0.659204	0.38052	441.257	20.444	C18H32N8O5	False	1.4434	0.000981505	0.0538974	1.4434	L-Seryl-L-alanyl-L-histidyl-L-lysinamide	14.7896	15.9107	15.1178	14.5057	15.8587	15.9176	15.1388	17.3427	17.0376	17.5495	16.7904	16.8108	15.3998	16.412
X21394	0.936292	1.22685	1.20391	0.721282	0.825672	1.05204	-0.604045	-0.344064	-0.523296	-0.566907	-1.24129	-1.06651	-1.75633	0.136399	276.158	43.224	C17H21N2	False	1.01829	0.000983327	0.0538974	-1.01829	1,3-Dibenzylimidazolidin-1-ium	16.6861	16.8792	16.864	16.5432	16.6126	16.763	15.6623	15.8351	15.7159	15.6869	15.2387	15.3549	14.8964	16.1544
X44238	-1.54134	-1.09949	0.124702	0.123619	0.384095	-1.21462	-1.87265	0.550554	0.875473	0.364069	0.905942	0.434062	1.21931	0.746279	446.19	27.436	C20H29N3O7	False	2.23797	0.000983651	0.0538974	2.23797	Amicoumacin A	12.3318	13.011	14.8928	14.8911	15.2915	12.834	11.8225	15.5474	16.0468	15.2607	16.0937	15.3683	16.5754	15.8482
X21579	0.0668142	-0.436998	0.128533	-1.49156	-1.0162	-1.20621	-1.29282	-0.0854772	1.12334	0.336567	1.68732	1.20813	0.833082	0.14548	277.175	19.379	C14H29OPS	False	1.23754	0.00098393	0.0538974	1.23754	1-(Dibutylphosphoryl)cyclohexane-1-thiol	16.993	16.5772	17.0439	15.7069	16.0992	15.9424	15.8709	16.8673	17.8649	17.2156	18.3303	17.9349	17.6254	17.0579
X75998	-0.384948	-1.45289	-1.16137	0.0640999	-0.779202	-0.295234	-1.19022	-0.646617	0.477141	1.25542	0.289886	1.48179	1.04322	1.29893	740.075	24.797	C22H28N7O14P3S	False	1.39566	0.00098446	0.0538974	1.39566	Dansylamino deoxy-ATP	14.2739	13.2706	13.5445	14.6957	13.9035	14.3581	13.5174	14.028	15.0837	15.8149	14.9078	16.0275	15.6155	15.8558
X39621	0.731268	-1.38193	-1.39157	-1.13294	-1.15627	-0.484455	-0.232381	-0.0366498	1.12152	1.12833	1.39706	-0.0164432	1.01688	0.437578	411.263	34.277	C25H34N2O3	False	4.33409	0.00098655	0.0539455	4.33409	Tilorone	13.3858	7.03595	7.00698	7.78414	7.71402	9.73273	10.4902	11.0783	14.5584	14.5789	15.3864	11.139	14.244	12.5033
X62655	-0.203987	-0.807173	0.403165	-0.877601	-1.26958	-1.81064	-0.530074	-0.114808	1.24492	0.660762	1.46374	0.990357	1.02459	-0.173673	593.303	21.213	C38H44N2S2	False	2.1994	0.000990765	0.0541096	2.1994	5,5'-Bis[(3,4-dibutylthiophen-2-yl)ethynyl]-2,2'-bipyridine	15.4535	14.5423	16.3707	14.436	13.8438	13.0265	14.9609	15.5882	17.6423	16.7598	17.9728	17.2577	17.3094	15.4993
X56875	0.134191	-1.01434	0.261937	-0.740141	-0.721696	-1.09982	-2	-0.166683	0.985947	1.32617	0.968457	1.07056	0.493522	0.554377	545.268	18.793	C36H34N4	False	1.27358	0.000994348	0.0542388	1.27358	2-[4-(1,3-diphenylimidazolidin-2-yl)phenyl]-1,3-diphenylimidazolidine	14.7729	13.7944	14.8817	14.028	14.0437	13.7216	12.91	14.5165	15.4985	15.7883	15.4836	15.5706	15.079	15.1308
X67270	0.470303	0.870225	1.29775	0.467404	-0.171104	0.93458	1.21926	-1.46504	0.390028	-0.516889	-0.448921	0.0828002	-1.39804	-1.73235	635.666	21.501	C43H88O3	False	2.30729	0.000995572	0.0542392	-2.30729	2,3-Di-O-phytanyl-sn-glycerol|C13863	12.1801	12.8148	13.4933	12.1755	11.1621	12.9169	13.3687	9.10861	12.0527	10.6134	10.7212	11.5651	9.21495	8.68438
X23376	-0.438293	-0.892588	-0.539175	-1.33922	-1.56228	-0.68714	0.326207	-0.111521	1.2345	1.12195	1.53649	1.3224	0.0498698	-0.0211837	290.165	19.944	C16H26ClN	False	1.75432	0.000997373	0.054271	1.75432	Piperidine, 1-benzyl-2,2,6,6-tetramethyl-, hydrochloride	16.3961	15.8526	16.2754	15.3183	15.0514	16.0984	17.3107	16.787	18.3973	18.2627	18.7586	18.5025	16.9801	16.8951
X16718	-0.0514085	1.57204	1.11578	0.678067	0.858658	1.08269	-0.0905612	0.348937	-1.17024	-1.02299	-1.58911	-0.424998	-1.28825	-0.0186091	241.085	44.607	C9H21OPS2	True	1.5298	0.00100171	0.054412	-1.5298	S-Ethyl S-(2-methylbutan-2-yl) ethylphosphonodithioate	15.8872	17.57	17.0971	16.6433	16.8305	17.0628	15.8466	16.3022	14.7274	14.88	14.2932	15.4999	14.6051	15.9212
X61163	-0.221714	-0.374718	0.0310859	-1.70945	0.111118	-1.82917	-1.10396	0.424052	0.82327	0.28696	1.04556	0.166812	0.681234	1.66891	581.303	19.822	C39H42O3	True	2.1226	0.00100456	0.054412	2.1226	(Benzene-1,3,5-triyl)tris[(4-tert-butylphenyl)methanone]	15.0264	14.8034	15.3949	12.8579	15.5115	12.6833	13.7404	15.9676	16.5495	15.7678	16.8736	15.5927	16.3425	17.7821
X25390	0.226013	0.872289	1.70811	0.484323	1.22882	0.517985	0.0621622	0.342089	-0.623446	-0.798411	-1.87326	-1.20686	-1.06288	0.123075	304.11	32.042	C17H18ClNO2	False	2.07966	0.00100489	0.054412	-2.07966	5-[(1E,3E,5E)-6-(3-chloro-pyrrol-2-yl)-5-methyl-hexa-1,3,5-trienyl]-2,2-dimethyl-furan-3-one	15.1616	16.0841	17.277	15.5303	16.593	15.5784	14.9278	15.3273	13.9492	13.6995	12.1654	13.1165	13.322	15.0147
X82272	0.251656	-1.47838	-2	0.0244837	-1.2232	-0.0274184	-0.466822	0.222881	1.08476	1.22401	0.256073	0.817939	0.626033	0.814337	921.437	23.086	C49H58N10O7	False	3.98944	0.00100518	0.054412	3.98944	L-Tyrosyl-D-tryptophyl-L-alanyl-L-tryptophyl-D-phenylalanyl-L-lysinamide	13.5695	8.78231	6.9893	12.9409	9.48841	12.7973	11.5814	13.4899	15.8748	16.2602	13.5818	15.1365	14.6055	15.1266
X17602	0.584064	1.88895	0.33838	0.313143	1.50143	-0.126728	0.61302	0.196454	-0.86962	-0.916791	-0.599541	-1.75926	-0.0993667	-1.06413	247.189	43.672	C12H24N4	False	1.92108	0.00100607	0.054412	-1.92108	bongardamine	14.4841	16.2003	14.161	14.1278	15.6906	13.5492	14.5222	13.9743	12.5722	12.5101	12.9274	11.4021	13.5852	12.3163
X24980	-1.10127	-0.0368537	-1.08127	-2	-0.624075	0.138281	-0.319642	1.25733	0.663059	1.82527	0.643297	0.318144	-0.0214723	0.365263	301.105	34.13	C15H18O5	True	3.50134	0.00100882	0.0544944	3.50134	Artecanin|C09302	8.80835	11.3909	8.85686	6.5646	9.96614	11.8158	10.7048	14.5309	13.089	15.9089	13.0411	12.2522	11.4282	12.3665
X27969	-0.357632	-1.04934	-1.59955	-0.920169	-0.320699	-1.33125	0.118031	0.351671	1.08268	1.27897	1.53936	0.140405	1.07503	-0.00749794	321.262	47.479	C16H34N4O	True	0.895982	0.00101221	0.0546117	0.895982	2,3S-dihydro-Aplysillamide A	16.4162	16.0189	15.703	16.0931	16.4374	15.857	16.6893	16.8235	17.2433	17.3561	17.5056	16.7022	17.2389	16.6173
X76022	-0.299076	-1.27013	-1.06679	-0.496455	-0.747696	-0.138229	-1.25352	-0.547493	0.522332	0.0803093	0.820098	1.65121	1.46357	1.28187	740.409	24.785	C45H51N6O4	False	1.15637	0.00101598	0.0547485	1.15637	7H-Pyrido(4,3-c)carbazolium, 2,2'-(1,10-decanediyl)bis(10-methoxy-, dibromide	13.746	13.0005	13.1566	13.5944	13.4016	13.8695	13.0132	13.5553	14.3766	14.0372	14.6052	15.2432	15.0992	14.9597
X31654	-0.988342	-0.0836094	0.161733	-0.147972	-0.503276	-2	-1.1666	0.65666	0.649432	0.979403	1.13226	0.700825	0.883369	0.167466	348.726	22.279	C3H2Br3ClO	False	1.48416	0.00101782	0.0547816	1.48416	1,1,3-Tribromo-3-chloro-2-propanone	13.1802	14.0893	14.3359	14.0247	13.6676	11.7201	13.0011	14.8332	14.8259	15.1575	15.3111	14.8776	15.061	14.3416
X58723	-1.0487	-0.260005	0.0858798	0.20916	-1.94439	-1.03153	-1.20443	0.643526	0.60751	1.00213	0.905092	1.12116	1.23326	-0.318659	560.333	38.552	C31H45N4O4	True	1.3766	0.00101913	0.0547861	1.3766	milnamide D	17.97	18.7017	19.0225	19.1369	17.1392	17.986	17.8256	19.5398	19.5064	19.8724	19.7824	19.9828	20.0868	18.6472
X9117	1.42776	1.23124	-0.353161	-0.181395	0.989085	1.75517	0.4842	-1.23446	-1.27882	-0.405598	-0.841057	-0.809907	-0.412267	-0.370795	175.075	37.648	C6H11ClN4	True	1.01293	0.00102183	0.0548599	-1.01293	Pyrazole-1-carboxamidine, 3,5-dimethyl-, monohydrochloride	19.5241	19.394	18.3446	18.4584	19.2336	19.7409	18.8992	17.7609	17.7315	18.3099	18.0215	18.0421	18.3054	18.3329
X40448	-0.481654	-1.32775	-1.08427	-1.38547	-0.717078	-0.147353	-0.181649	-0.0492097	0.951849	1.61753	1.41399	0.704561	-0.393205	1.07971	418.223	20.24	C23H28O6	False	1.05295	0.00102398	0.0548599	1.05295	Deoxygomisin A|C10555	16.9129	16.3274	16.4959	16.2874	16.75	17.1443	17.1205	17.2122	17.905	18.3657	18.2248	17.7338	16.9741	17.9935
X65454	-0.257488	-0.701753	-1.26585	-1.25389	-0.69836	-0.813577	-0.170682	-0.102782	0.602931	1.81328	1.84114	0.913392	0.360943	-0.267307	618.334	20.54	C26H45N9O7	True	1.5138	0.0010242	0.0548599	1.5138	GGVHVK	14.6707	14.2147	13.6357	13.6479	14.2182	14.0999	14.7598	14.8295	15.5539	16.7964	16.825	15.8726	15.3055	14.6607
X38939	-0.577745	-1.16163	0.584929	-1.17488	-1.57713	-0.48656	-0.715486	0.00280719	1.3813	0.798445	1.41828	1.31911	-0.0532132	0.24177	406.227	20.034	C22H32ClN3O2	False	1.87199	0.00103537	0.0553794	1.87199	Piboserod hydrochloride	16.1298	15.381	17.621	15.364	14.8481	16.2468	15.9532	16.8744	18.6424	17.8949	18.6898	18.5627	16.8026	17.1809
X37160	1.28285	-0.632951	0.915799	1.19282	0.898766	1.01323	0.430715	-0.696781	0.376435	-0.97174	-1.70567	-1.1254	-0.961581	-0.0165077	392.19	19.372	C22H25N5S	False	1.94674	0.00103638	0.0553794	-1.94674	3-{4-[4-(1H-Benzimidazol-1-yl)butyl]piperazin-1-yl}-1,2-benzothiazole	17.4566	14.8977	16.9663	17.3364	16.9436	17.0965	16.3184	14.8125	16.2459	14.4452	13.4649	14.24	14.4588	15.7211
X370	-1.47099	0.256943	-0.13633	-0.81322	-0.0624252	-1.25257	-1.54961	1.6356	-0.157746	0.745861	1.30769	0.333371	0.156375	1.00705	71.0294	5.438	C2H2N2O	False	5.38208	0.00103784	0.0553909	5.38208	1,2,5-Oxadiazole	5.65606	12.1295	10.6561	8.12027	10.933	6.47434	5.36151	17.2944	10.5759	13.9611	16.0659	12.4158	11.7527	14.9396
X45168	0.0809205	0.0563216	-1.4258	-0.437065	-1.02058	-0.837645	-1.48352	-0.571057	0.0242019	1.47904	1.06858	0.984084	1.16233	0.920185	453.262	22.512	C27H34N4O	False	2.47789	0.00104176	0.055527	2.47789	1-(3-cyano-3,3-diphenylpropyl)-4-(piperidin-1-yl)piperidine-4-carboximidic acid	18.8762	18.8341	16.2975	17.9896	16.991	17.3041	16.1987	17.7603	18.7791	21.269	20.5665	20.4219	20.727	20.3125
X44749	-0.371958	0.0420012	0.0975309	-1.14287	-1.561	-0.147034	-1.99105	0.24894	0.642859	0.743991	1.275	1.28179	-0.025724	0.907517	450.262	19.683	C26H37NO4	False	2.31936	0.00104288	0.055527	2.31936	PUBCHEM_46193340	16.4137	17.0759	17.1648	15.1804	14.5115	16.7735	13.8236	17.407	18.0372	18.199	19.0484	19.0593	16.9676	18.4606
X11030	1.51399	0.25212	1.86599	0.087482	1.51468	-0.257666	0.187561	-0.41116	-0.373704	-1.16573	-0.97043	-1.29322	-0.361056	-0.588858	193.085	41.103	C5H15N4O3P	True	1.46782	0.00104717	0.055685	-1.46782	Phosphoagmatine|C02726	16.7487	15.4934	17.0989	15.3296	16.7494	14.9863	15.4292	14.8336	14.8708	14.0829	14.2772	13.9561	14.8834	14.6568
X60953	0.316183	-0.358799	-0.978535	-0.921718	-0.551345	-1.09926	-1.49367	-0.70993	0.746852	0.298716	0.728785	1.03045	1.49518	1.49709	579.3	24.905	C27H46O13	False	2.0825	0.00104835	0.055685	2.0825	(2R,3R,5R,7R,10S)-atractyloside G 2-O-beta-D-glucopyranoside	15.1185	14.1514	13.2635	13.3449	13.8756	13.0905	12.5254	13.6483	15.7356	15.0935	15.7097	16.1419	16.8078	16.8105
X21584	0.36146	2	0.128186	1.23696	0.769727	0.327615	0.288059	-0.413873	-1.17326	-0.694285	-1.54159	-0.939651	-0.236841	-0.362659	277.176	42.737	C12H24N2O5	True	0.987113	0.00105259	0.0558435	-0.987113	Hydroxycarisoprodol	17.6768	18.8937	17.5265	18.2409	17.9398	17.655	17.6295	17.1772	16.6879	16.9965	16.4506	16.8384	17.2913	17.2102
X65101	-0.26052	0.366089	-1.61814	-0.96082	-0.697441	-0.606441	-1.27375	0.154224	-0.619167	0.653025	1.07259	1.21995	1.33062	1.23978	614.997	21.686	C32H48O10	False	2.86538	0.00105404	0.0558543	2.86538	w/o MS2:debromoaplysiatoxin	11.1775	12.4216	8.48194	9.78706	10.31	10.4907	9.16574	12.001	10.4654	12.9914	13.8244	14.117	14.3367	14.1564
X48357	0.144362	-0.555518	-1.96822	0.0431164	-1.05723	0.0154067	-1.64447	8.83271e-05	0.45606	1.35123	0.501378	0.788352	0.637002	1.28844	477.261	21.308	C28H38O5	False	5.0953	0.00106341	0.0562354	5.0953	15-[1-(4,5-dimethyl-6-oxo-3,6-dihydro-2H-pyran-2-yl)ethyl]-5-hydroxy-10,14-dimethyl-3-oxapentacyclo[9.7.0.0??,?.0?,???.0???,???]octadec-7-en-9-one	14.3577	11.8727	6.8566	13.9983	10.0913	13.8999	8.00614	13.8455	15.4645	18.643	15.6254	16.6444	16.107	18.42
X31254	-1.11181	-1.00601	-0.759344	-1.24711	0.547873	-0.865812	-0.736793	1.07869	1.05931	1.55097	0.993228	-0.15795	-0.417685	1.07245	345.201	21.365	C16H28N2O6	False	1.38207	0.00106486	0.0562354	1.38207	1-(tert-Butoxycarbonyl)-4-[(tert-butoxycarbonyl)amino]piperidine-4-carboxylic acid	14.7021	14.8009	15.0313	14.5757	16.2523	14.9319	15.0524	16.7481	16.73	17.1892	16.6682	15.593	15.3504	16.7422
X57231	1.27754	0.951634	0.367808	-0.119868	-0.149574	1.22597	1.70492	-0.643347	-1.0294	-0.789182	-0.132849	-0.220929	-1.82725	-0.615486	548.328	22.783	C30H42O8	False	1.15247	0.00106502	0.0562354	-1.15247	w/o MS2:Proscillaridin	15.2942	15.0442	14.5964	14.2223	14.1995	15.2546	15.622	13.8207	13.5246	13.7089	14.2123	14.1448	12.9126	13.8421
X986	1.0726	0.971661	0.252114	0.148	1.08733	0.139216	1.37734	-0.652053	-0.39323	-0.691884	-0.339066	-0.370184	-0.0709056	-2	79.0062	6.373	H3N2OP	True	2.79947	0.00107094	0.0564812	-2.79947	PUBCHEM_19001390	14.6453	14.4494	13.0528	12.8507	14.6739	12.8337	15.2368	11.2979	11.8003	11.2206	11.9054	11.845	12.4259	7.65119
X42875	0.101619	-0.791321	0.0142417	-1.62379	-0.546075	-0.964332	-1.38514	-0.173587	0.924829	0.987478	1.11674	0.677019	-0.0722245	1.73454	435.756	19.923	C9H6Br3NOS	False	1.30945	0.00108035	0.0569098	1.30945	3-methylsulfinyl-2,4,6-tribromoindole	14.7735	13.9858	14.6965	13.2513	14.2021	13.8331	13.4619	14.5307	15.4998	15.5551	15.6691	15.2812	14.6202	16.2142
X27162	0.122687	-0.600456	-0.480197	-2	-0.774652	-1.39615	0.0558537	-0.0697996	0.635271	1.26105	1.52746	1.00357	0.193505	0.559486	316.18	20.147	C18H28ClN	False	1.7265	0.00108609	0.0571449	1.7265	Piperidine, 4-methyl-1-(1-phenylcyclohexyl)-, hydrochloride	14.9661	14.111	14.2532	12.4117	13.905	13.1702	14.887	14.7385	15.5721	16.3121	16.6271	16.0076	15.0498	15.4825
X68850	-0.693299	-0.800318	0.495161	-1.77004	-0.850249	-1.33783	-0.065804	-0.013663	1.31042	-0.0550464	1.43425	1.20583	0.795681	0.344895	650.301	19.432	C26H47N7O8S2	False	4.06933	0.00108966	0.0571574	4.06933	Glycyl-L-asparaginyl-L-valyl-L-methionyl-L-valyl-L-methionine	9.3316	9.02811	12.7019	6.27814	8.88651	7.50382	11.1111	11.2589	15.0138	11.1416	15.365	14.7172	13.5541	12.2758
X76001	-0.618647	-0.998829	-1.49257	0.187385	-0.842052	-0.33173	-1.06092	-0.140914	-0.116688	1.65424	0.101345	1.39727	0.885198	1.37691	740.079	24.865	C38H74NaO10P	False	1.44237	0.00108994	0.0571574	1.44237	w/o MS2:16:0 PG (1,2-dihexadecanoyl-sn-glycero-3-phospho-(1'-rac-glycerol) (sodium salt))	13.8195	13.4474	12.9641	14.6085	13.6008	14.1004	13.3866	14.2872	14.3109	16.0443	14.5243	15.7928	15.2916	15.7729
X43240	0.402805	1.04257	1.28468	0.269957	0.927697	0.854492	0.284615	-0.291343	-1.58356	-1.77323	-1.00373	-0.872896	0.839132	-0.381189	438.237	31.062	C25H35O5	True	2.22044	0.00109018	0.0571574	-2.22044	Fascaplysin B	16.1221	17.1034	17.4747	15.9183	16.9272	16.8149	15.9408	15.0574	13.0754	12.7845	13.9647	14.1654	16.7913	14.9196
X72876	1.2892	-0.273862	0.891676	-0.110771	1.49137	0.938097	0.790577	-0.459103	-0.584016	-2	-0.0863905	-0.795356	-0.345066	-0.466472	695.35	25.647	C33H58O11S2	False	4.59298	0.00109765	0.0574816	-4.59298	Antibiotic A 32724A	15.1959	10.1868	13.922	10.7095	15.8438	14.0707	13.598	9.5932	9.19289	3.75825	10.7876	8.51562	9.95865	9.56958
X20348	1.39139	-0.140026	0.283888	0.926515	0.859753	1.44344	0.501841	-0.569053	-1.78874	0.00409516	-1.35255	-0.349561	-1.24683	0.0358296	268.132	37.597	C12H18ClN5	False	1.1132	0.00110082	0.0575801	-1.1132	6,6-Dimethyl-1-(2-methylphenyl)-1,6-dihydro-1,3,5-triazine-2,4-diamine--hydrogen chloride (1/1)	17.3623	16.2294	16.543	17.0184	16.969	17.4008	16.7043	15.912	15.0098	16.336	15.3324	16.0744	15.4107	16.3595
X3815	1.07311	1.84486	0.220121	1.0334	-0.33885	1.1323	0.0875936	-1.40165	-0.720185	-0.250977	-1.35241	-0.485832	-1.11305	0.271571	114.128	33.212	C7H15N	False	2.42157	0.00110546	0.0577146	-2.42157	(2RS,6RS)-Nanofin,INN	12.5797	13.8743	11.1489	12.5131	10.2112	12.679	10.9266	8.42839	9.57153	10.3586	8.51098	9.96465	8.9125	11.2352
X52665	-0.309477	-0.254753	-1.8912	0.561206	-0.993187	-0.429788	-1.70375	0.709516	0.50148	1.25562	-0.115081	0.705062	0.75557	1.20878	512.236	20.857	C26H33N5O4S	False	3.79153	0.00110599	0.0577146	3.79153	N-{[5-{[(3-Methoxyphenyl)methyl]sulfanyl}-4-(4-nitrophenyl)-4H-1,2,4-triazol-3-yl]methyl}-3,5,5-trimethylhexanamide	10.235	10.3796	6.05451	12.5362	8.42795	9.91701	6.54994	12.9282	12.3784	14.3715	10.7488	12.9164	13.0499	14.2477
X67099	0.0216428	-0.086418	-0.276567	-1.96236	-0.473304	-0.344475	-1.89695	-0.321775	0.775315	1.15133	0.871919	0.672768	0.675385	1.19348	634.247	19.685	C24H38N9O8P	False	3.8949	0.00111136	0.0579023	3.8949	Phosphoric acid, bis(2-(1,2,3,6-tetrahydro-1,3-dimethyl-2,6-dioxopurin-7-yl)ethyl) ester, diisopropylamine salt	12.7178	12.4243	11.9078	7.32844	11.3733	11.7233	7.50613	11.785	14.7651	15.7865	15.0275	14.4865	14.4937	15.901
X54541	0.0781999	-0.0842152	-0.03169	-2	-1.21786	-0.994627	-0.375318	0.198918	0.991438	0.751839	1.09517	1.20485	0.625594	0.14934	527.241	19.065	C24H36N6O4S	False	4.00111	0.00111218	0.0579023	4.00111	Bis(1H-benzimidazole-1-pentylammonium) sulphate	14.6328	14.1795	14.3261	7.73901	11.0152	11.6383	13.367	14.9698	17.1818	16.5131	17.4714	17.7775	16.1607	14.8314
X51559	0.46664	1.31351	0.730703	1.10385	0.15064	1.61391	0.260482	-1.18487	-1.09727	-0.225753	-0.969225	-0.376542	-1.69122	-0.0948501	503.233	21.247	C19H36N4O10	False	0.752768	0.00111554	0.0580093	-0.752768	6'-Oxogentamicin X2|C21267	15.3635	15.7591	15.4868	15.6612	15.2159	15.8994	15.2672	14.592	14.6329	15.04	14.6927	14.9696	14.3554	15.1012
X44443	1.19268	1.81933	-0.0323807	0.0576446	-0.220649	1.00692	1.22138	-0.640577	-0.530168	0.0403731	-0.247466	-1.58382	-1.41316	-0.670107	447.897	22.261	C22H25NO9	False	2.49339	0.00112287	0.0582602	-2.49339	w/o MS2:2-[[4-(2,4-dihydroxy-3,5,6-trimethylbenzoyl)oxy-2-hydroxy-6-methylbenzoyl]amino]-3-hydroxybutanoic acid	12.3221	13.4061	10.2029	10.3586	9.87724	12.0007	12.3717	9.15084	9.34183	10.3288	9.83086	7.51919	7.81439	9.09976
X38265	1.3778	0.350595	0.765136	0.907418	-0.169967	0.868206	1.06219	-0.885422	-0.690053	-1.23493	-2	0.0850908	-0.616008	0.279673	401.215	20.584	C18H34O8	False	1.38617	0.00112298	0.0582602	-1.38617	12,12'-Bi-1,4,7,10-tetraoxacyclotridecane	15.7237	14.7582	15.1478	15.2816	14.2689	15.2447	15.4271	13.5963	13.78	13.2678	12.4549	14.5086	13.8496	14.6915
X55773	0.0691886	-0.0359659	0.0675727	-0.561496	-1.89359	-1.62942	-1.19854	0.198648	0.389774	0.577679	1.53056	0.808701	1.02449	0.652389	536.334	41.234	C35H47NS	True	1.30666	0.00112706	0.0583705	1.30666	10H-Phenothiazine, 3,7-dioctyl-10-(phenylmethyl)-	21.1594	21.0666	21.158	20.6028	19.4272	19.6604	20.0406	21.2736	21.4423	21.6081	22.449	21.812	22.0024	21.6741
X43734	-0.441814	-0.339288	0.448144	-0.722125	-0.317761	-2	-1.46194	1.0939	1.34299	0.362911	0.703981	0.199539	0.844046	0.537071	442.238	22.244	C29H31NO3	False	1.85812	0.00112772	0.0583705	1.85812	1H-Cyclopent(f)isoquinoline, 2,3,4,7,8,9-hexahydro-5,6-dimethoxy-3-(3,3-diphenylpropionyl)-	16.6166	16.7478	17.7549	16.2581	16.7753	14.3042	15.3118	18.5809	18.8995	17.6459	18.0822	17.437	18.2613	17.8687
X44479	1.74225	0.187713	1.17098	1.08743	0.0383851	0.0227157	0.826193	-1.31246	-0.296401	-0.616198	-1.24703	-1.24301	0.63697	-0.997536	448.25	19.831	C29H29N5	False	1.94722	0.0011296	0.0584	-1.94722	2,6-Bis[3-(2,4,6-trimethylphenyl)-1H-pyrazol-1-yl]pyridine	17.0481	14.9608	16.2811	16.1689	14.7603	14.7393	15.8181	12.9465	14.3108	13.8814	13.0343	13.0397	15.5641	13.3693
X52079	-0.763533	0.102646	0.239795	-2	-0.679467	-1.33688	-0.189245	0.712686	0.961778	0.560289	1.28757	0.803696	0.486338	0.208792	507.272	19.381	C29H40O6	False	3.27232	0.00113373	0.0585454	3.27232	Stigmatellin Y|C12150	11.5438	13.5196	13.8324	7.82369	11.7356	10.236	12.8538	14.911	15.4792	14.5634	16.2224	15.1186	14.3948	13.7617
X50185	-0.23817	0.00357765	-0.189143	-1.44386	-0.046333	-1.18549	-1.93366	-0.126719	0.110427	1.04385	1.03261	0.469686	0.988563	1.51465	492.298	21.927	C31H39N3O	False	2.69585	0.00114067	0.0588354	2.69585	N-[1-(3,3-Diphenylpropyl)piperidin-4-yl]-N-ethyl-N'-(1-phenylethyl)urea	12.4122	12.8655	12.5042	10.1519	12.7719	10.6363	9.23373	12.6212	13.0658	14.8156	14.7946	13.7393	14.712	15.6983
X68751	-0.151783	0.347013	-2	-0.16594	-1.34648	-0.918193	-0.7382	0.70042	-0.35084	1.01622	0.414306	0.917675	1.42844	0.883663	648.899	26.178	C20H25Br3N2O4S	False	3.92306	0.00114369	0.058923	3.92306	(4R)-2-[(2R,4R,6R,8Z)-9-hydroxy-4,6-dimethyl-7-oxo-9-(3,4,5-tribromo-1H-pyrrol-2-yl)non-8-en-2-yl]-4-methyl-4,5-dihydro-1,3-thiazole-4-carboxylic acid	11.3315	12.6985	6.16653	11.2927	8.05713	9.23095	9.72426	13.6671	10.7859	14.5326	12.883	14.2626	15.6624	14.1693
X29881	-0.488793	-0.107481	-0.484578	-1.65063	-1.50489	-0.859137	0.00624715	0.460561	0.927693	1.42709	1.38037	1.22693	0.158592	-0.491973	335.204	19.911	C20H30O2S	False	1.76727	0.0011465	0.0589552	1.76727	4-(Methylsulfanyl)phenyl 4-hexylcyclohexane-1-carboxylate	18.3396	18.803	18.3447	16.9275	17.1046	17.8895	18.9413	19.4934	20.0612	20.6681	20.6114	20.4249	19.1264	18.3357
X69888	1.41842	0.671044	-0.412996	-0.0937023	0.666204	1.34119	1.40886	-1.23835	-0.533903	-0.930024	-0.147217	0.380696	-1.46489	-1.06534	661.319	24.652	C33H50O12	False	5.40456	0.00114956	0.0589552	-5.40456	pfaffiaglycoside E	16.2271	13.3991	9.29719	10.5054	13.3808	15.9349	16.191	6.17412	8.83968	7.34079	10.3029	12.3005	5.3169	6.82877
X6858	0.932342	1.37461	0.75367	-0.769605	1.25051	0.550048	0.909962	-0.0282975	-1.16425	-1.51515	0.109405	-0.144877	-1.4044	-0.853974	151.03	40.985	C5H8N2S	False	4.84942	0.00114958	0.0589552	-4.84942	Thiazolylethylamine|C17927	14.25	15.7508	13.6437	8.47436	15.3297	12.9527	14.174	10.99	7.13512	5.94432	11.4573	10.5944	6.32014	8.18804
X30942	0.316199	-1.36554	-1.56083	-1.009	0.0770262	-0.89979	-0.725636	-0.368803	1.07587	1.37963	0.65448	0.203588	1.3371	0.885697	343.161	20.905	C24H23P	False	1.33523	0.00114968	0.0589552	1.33523	[3-(1H-Inden-3-yl)propyl](diphenyl)phosphane	16.4309	14.91	14.7334	15.2324	16.2146	15.3312	15.4887	15.8114	17.1179	17.3926	16.7368	16.3291	17.3541	16.9459
X70321	-0.714801	-0.646276	-0.50292	-0.684453	-0.704395	0.249722	-2	-0.556955	0.222701	0.978945	0.993567	1.1193	0.677483	1.61175	666.338	21.451	C34H49N3O9	False	2.28502	0.00115279	0.0589552	2.28502	NSC210753	13.9872	14.0958	14.323	14.0353	14.0037	15.5157	11.8814	14.2374	15.4729	16.6713	16.6945	16.8937	16.1936	17.6741
X63729	-0.408439	-0.524041	0.0673003	-2	-1.05191	-0.176096	-0.423391	0.354036	1.43498	0.62559	0.783957	1.25088	0.107488	0.461208	602.36	21.175	C25H47N9O8	True	3.14143	0.00115527	0.0589552	3.14143	QISVR	12.3288	12.0755	13.3711	7.74261	10.9189	12.8378	12.296	13.9994	16.3678	14.5944	14.9414	15.9644	13.4592	14.2342
X4637	-0.243206	-0.7489	-0.360976	-0.782399	-1.42118	-1.08612	-0.810463	-0.0677759	0.219783	0.0889407	1.57704	0.992634	1.93628	0.706341	124.112	36.924	C8H15NO	False	0.860894	0.00115554	0.0589552	0.860894	Tropine|C00729	18.3317	18.0522	18.2666	18.0337	17.6808	17.8659	18.0182	18.4286	18.5875	18.5152	19.3374	19.0145	19.5359	18.8563
X64837	-1.41887	-0.805625	0.874982	-0.927515	-1.18107	-1.00208	-0.545522	1.21522	0.935263	0.250951	1.39457	1.08571	-0.422513	0.546504	612.281	18.939	C34H37N5O6	False	4.0279	0.00115629	0.0589552	4.0279	cyclo(Gly1-Phe2-Tyr3-Pro4-Phe5)	9.86215	11.5892	16.3224	11.246	10.5319	11.036	12.3218	17.2806	16.4921	14.5649	17.7857	16.9158	12.6682	15.3973
X48817	-0.415913	-0.318713	-0.784223	0.102131	-1.13274	-1.88657	-0.579309	-0.547208	0.729436	1.31026	0.889035	1.34257	1.33385	-0.0426054	480.937	20.959	C16H10O10S3	False	3.27675	0.00115637	0.0589552	3.27675	Pyranine	11.7443	11.9666	10.9021	12.929	10.1052	8.38138	11.3707	11.4441	14.3634	15.6916	14.7284	15.7655	15.7456	12.598
X45408	0.161739	-0.780539	0.303532	-0.511044	-1.32247	-1.90763	-0.962602	-0.279993	1.20616	0.513978	1.29688	1.18442	0.223023	0.874552	455.224	20.552	C24H36Cl2N2O2	False	3.07097	0.00115754	0.0589552	3.07097	Piperazine, 1-(2-(2-(diphenylmethoxy)ethoxy)ethyl)-2,4,5-trimethyl-, dihydrochloride, (E)-	15.1165	13.0986	15.4202	13.6757	11.938	10.6849	12.7087	14.1705	17.3532	15.8708	17.5474	17.3066	15.2477	16.643
X10785	0.466127	0.536461	0.650999	0.32894	1.81436	0.699468	0.522608	0.685009	-0.464396	-2	-1.03105	-1.281	-0.439834	-0.459	191.016	22.355	C10H8O3S	False	3.05332	0.00115926	0.0589756	-3.05332	1-Naphthalenesulfonic acid|C16201	14.4677	14.6174	14.8613	14.1756	17.3384	14.9645	14.5879	14.9337	12.4864	9.15558	11.2798	10.7476	12.5387	12.4979
X4205	0.529433	1.85147	1.40481	0.79359	0.480975	0.603599	-0.233002	-0.176339	-0.60861	-1.47181	-1.44426	-0.801139	-0.859213	-0.0694992	119.085	48.788	C9H12O	False	0.87664	0.00116644	0.0592336	-0.87664	4-Propylphenol|C14311	17.0646	17.8115	17.5592	17.2139	17.0372	17.1065	16.6339	16.6659	16.4217	15.934	15.9496	16.3129	16.2801	16.7262
X16688	1.13756	0.768449	-0.0482358	-0.277358	1.26158	1.15061	1.00697	-0.215753	-0.786607	-2	0.402009	-1.02036	-0.441245	-0.864987	241.06	27.147	C9H15O4P	False	4.45976	0.00116699	0.0592336	-4.45976	Triallyl phosphate	15.3729	14.2205	11.6707	10.9554	15.7601	15.4136	14.9652	11.1477	9.36545	5.35037	13.0764	8.63565	10.4437	9.12074
X72844	1.3706	0.656027	0.340298	0.158435	1.14698	1.33229	-0.00808038	-0.989675	-1.47173	-1.62859	-0.421076	0.0501699	-1.0859	0.550258	695.016	25.7	C27H18O20S	False	4.80535	0.00117063	0.0593358	-4.80535	HMDB0129511	16.6573	14.252	13.1893	12.5771	15.9046	16.5284	12.0166	8.71249	7.08985	6.56185	10.6264	12.2127	8.38857	13.896
X5499	1.17124	0.796544	-0.0206251	0.366769	1.62712	0.587893	1.16589	-1.52494	-0.845482	-0.338872	-0.751852	-0.36235	-0.263492	-1.60785	135.101	2.043	C7H14N	True	0.718776	0.00117225	0.0593358	-0.718776	N,N,3-Trimethylbut-2-en-1-iminium	18.5335	18.3679	18.0069	18.1781	18.7348	18.2758	18.5311	17.3424	17.6426	17.8664	17.6839	17.856	17.8997	17.3058
X34754	0.905404	0.322201	1.71878	0.368134	0.736345	0.547529	0.518633	-0.633158	-1.50171	-1.30242	-0.528639	-1.18362	0.976072	-0.943547	373.175	31.846	C17H28N2O7	True	1.52948	0.001173	0.0593358	-1.52948	Lascivol	17.3329	16.7227	18.1838	16.7708	17.156	16.9585	16.9282	15.7233	14.8146	15.0231	15.8326	15.1474	17.4068	15.3986
X14332	1.31655	1.10863	0.407071	0.404375	0.363715	1.25222	0.810838	-0.471553	-1.50712	-1.8595	-0.655276	0.191286	-0.738149	-0.623086	222.123	43.482	C11H15N3O2	False	0.72882	0.00119389	0.0603238	-0.72882	3-Amino-5-cyclohexyl-pyrazine carboxylic acid	16.6043	16.5107	16.1947	16.1935	16.1752	16.5754	16.3766	15.7989	15.3325	15.1738	15.7162	16.0975	15.6789	15.7307
X12823	1.48727	0.170441	0.249545	1.62589	1.40766	0.813634	-0.533689	-0.475158	-0.382157	-0.687051	-1.48241	-0.877852	-1.1307	-0.185415	209.114	44.013	C8H20N2S2	False	1.15069	0.00119745	0.0604354	-1.15069	N,N-Tetramethylcystamine	16.7829	15.7671	15.8281	16.8899	16.7215	16.2633	15.2239	15.2691	15.3408	15.1056	14.492	14.9584	14.7634	15.4926
X39993	-0.446813	-0.872999	-0.292602	0.269043	-1.15418	-1.82146	-0.873649	0.149909	1.39918	1.26741	1.48244	0.590652	0.531129	-0.228057	414.32	37.452	C22H41N5O	False	1.21697	0.0011994	0.0604654	1.21697	Phloeodictine A5	15.129	14.7794	15.2555	15.7162	14.5488	14.0014	14.7789	15.6185	16.6432	16.5352	16.7115	15.98	15.9312	15.3085
X55510	-0.611177	0.542091	-0.765132	0.0444379	-2	-1.25513	-0.924219	0.628665	0.178476	1.29025	0.701789	1.119	0.914189	0.274122	534.318	38.743	C31H45NO5	True	1.53856	0.00120707	0.0607832	1.53856	methyljervine-N-3'-propanoate	20.1521	21.3683	19.9898	20.8435	18.5427	19.4731	19.822	21.4596	20.9848	22.1572	21.5367	21.9767	21.7607	21.0857
X59637	0.0869616	0.443945	-2	-0.688328	-0.903926	-0.495438	-1.11959	0.735982	0.06249	1.11788	0.681552	0.332864	0.958088	1.1232	567.931	21.304	C15H17I2N5O4	False	2.8323	0.00120873	0.060798	2.8323	HLo7|C07596	11.1411	11.8472	6.34949	9.60771	9.18129	9.98921	8.75475	12.4248	11.0927	13.1801	12.3171	11.6275	12.864	13.1906
X76895	0.571067	0.361301	0.797176	0.671497	1.90077	-0.25423	1.00131	0.00721266	-1.24048	-0.772335	-1.30603	-0.831443	0.504734	-1.41055	756.275	11.229	C34H46ClN3O14	False	1.99248	0.00121957	0.0612739	-1.99248	ansacarbamitocin F	15.8388	15.5491	16.1511	15.9776	17.6755	14.6989	16.4331	15.06	13.3367	13.9833	13.2461	13.9017	15.7472	13.1018
X46084	-0.243081	-0.867992	0.481167	-1.91578	-0.960433	-0.230037	-1.28726	-0.0836976	1.20721	0.594009	1.27872	0.706822	0.0160634	1.30429	460.27	20.642	C27H33N5O2	False	2.40736	0.00122267	0.0613607	2.40736	Pyrrolidine, 1-((4-((1-(3-oxo-3-phenylpropyl)-1H-benzimidazol-2-yl)methyl)-1-piperazinyl)acetyl)-	15.6103	14.5621	16.825	12.8046	14.407	15.6321	13.8589	15.8776	18.0428	17.0143	18.1628	17.2035	16.0449	18.2057
X56121	-1.22654	-0.0295877	-0.17633	-1.92586	-0.802959	-1.22359	0.399875	0.852118	0.767381	0.793961	1.27451	0.900293	0.903321	-0.50659	539.288	20.109	C32H40N2O4	False	4.47202	0.00122677	0.061497	4.47202	Chaetoglobosin F	9.42753	13.1858	12.725	7.23176	10.7575	9.43679	14.5342	15.9542	15.6881	15.7716	17.2804	16.1054	16.1149	11.6881
X30136	-0.280066	0.91767	0.11361	1.3963	1.39729	1.19315	0.30766	0.7562	-1.03245	-1.40774	-0.611185	-0.658419	-1.17113	-0.920891	337.161	45.512	C14H28N2O3S2	False	2.00624	0.00122843	0.0615113	-2.00624	2,6-Diamino-2,3,4,6-tetradeoxy-erythro-hexose,9CI,8CI-Di-Et-dithioacetal, 2,6-di-N-Ac	13.5533	15.2202	14.1012	15.8863	15.8876	15.6035	14.3712	14.9954	12.5062	11.984	13.0925	13.0268	12.3132	12.6615
X17424	-0.434694	0.266568	-1.41028	-0.526872	-1.70245	-0.405293	-1.0293	0.98493	-0.249832	1.06123	0.0383959	1.38904	0.674223	1.34434	246.169	22.527	C11H21N5	True	1.08809	0.00123228	0.0616347	1.08809	s-Triazine, 4,6-bis(isopropylamino)-2-ethyl-	18.9766	19.486	18.2679	18.9096	18.0556	18.998	18.5446	20.0079	19.1109	20.0633	19.3203	20.3015	19.7822	20.269
X46999	0.886749	0.612066	0.70744	-0.355482	0.922294	1.03566	1.1982	-0.964645	-0.364666	-0.209459	0.204096	-0.108182	-1.36896	-2	467.238	24.555	C22H32N6O4	False	2.75492	0.00123902	0.0618899	-2.75492	7H-Purine-7-acetamide, 1,2,3,6-tetrahydro-N-cyclohexyl-N-((cyclohexylamino)carbonyl)-1,3-dimethyl-2,6-dioxo-	15.4215	14.8925	15.0762	13.0292	15.4899	15.7082	16.0212	11.8561	13.0115	13.3104	14.1068	13.5054	11.0775	9.48649
X21200	0.786762	1.61532	0.0619596	0.199053	1.37448	0.409059	1.00413	0.318473	-0.875377	-0.279647	-1.01665	-1.54506	-1.33482	-0.717679	274.237	48.418	C15H31NO3	False	0.841974	0.00124016	0.0618899	-0.841974	2-hydroxyethyl dodecylcarbamate	16.2809	16.7289	15.8891	15.9632	16.5987	16.0767	16.3985	16.0278	15.3823	15.7044	15.3059	15.0203	15.1339	15.4676
X18598	1.71818	0.870055	0.679342	0.239565	0.663765	0.762924	0.0524853	-1.32274	-0.546492	-1.34904	-0.0780893	0.213856	-1.95547	0.0516646	255.076	30	C10H17O4P	False	3.86607	0.00124276	0.0619376	-3.86607	1,3-Propanediol, 2-cyclohexyl-2-(hydroxymethyl)-, cyclic phosphate (1:1)	18.6081	16.3065	15.789	14.5956	15.7467	16.0158	14.0879	10.356	12.4625	10.2846	13.7336	14.5258	8.63895	14.0857
X59676	0.710772	0.531438	0.876697	1.41036	-0.35412	0.995619	0.827679	-0.111764	-0.355684	-2	-0.81793	-0.558608	0.117979	-0.873138	568.295	19.679	C21H41N7O11	False	3.04622	0.00124389	0.0619376	-3.04622	3'-Deoxydihydrostreptomycin|C03755	15.3634	14.9809	15.7173	16.8556	13.092	15.971	15.6128	13.6089	13.0886	8.72956	12.1026	12.6558	14.099	11.9849
X20458	-0.0597338	0.819745	0.265063	1.57695	1.26382	0.996367	0.164683	0.570362	-0.948158	-0.178507	-1.19306	-0.849857	-1.84696	-0.580716	269.116	49.83	C12H17ClN4O	False	2.20607	0.00125039	0.0621501	-2.20607	2-[(E)-(4-Methoxyphenyl)diazenyl]-1,3-dimethyl-2,3-dihydro-1H-imidazol-1-ium chloride	13.7496	15.1004	14.2484	16.2635	15.7825	15.3717	14.0943	14.7174	12.385	13.5671	12.0088	12.5359	11.0044	12.9493
X81548	-0.844714	0.733955	-0.618315	-0.921836	-0.530273	-1.51587	-1.28586	0.355855	-0.48531	0.337128	1.28959	0.988474	1.09158	1.4056	881.434	19.614	C44H64O18	True	3.99658	0.00125171	0.0621501	3.99658	w/o MS2:NCGC00385549-01_C44H64O18_Olean-12-en-29-oic acid, 22-(acetyloxy)-3-[(2-O-hexopyranuronosylhexopyranuronosyl)oxy]-11-oxo-	9.14754	13.5792	9.78309	8.93104	10.0302	7.26347	7.90915	12.5178	10.1565	12.4652	15.139	14.2937	14.5831	15.4646
X65248	-0.345736	-0.937798	0.868682	-1.42731	-1.34172	-0.900105	-0.931592	0.213105	1.66071	0.232467	1.33168	0.94758	0.271703	0.358334	616.324	21.003	C35H47NO7	False	2.42296	0.00125235	0.0621501	2.42296	(1R,3E,7S,9S,10E,12E,14R,15R)-9-hydroxy-7-[(2S,3R,4E,6E,8E)-3-methoxy-4,8-dimethyl-9-(2-methyl-1,3-oxazol-4-yl)nona-4,6,8-trien-2-yl]-10,14-dimethyl-6,16-dioxabicyclo[13.3.1]nonadeca-3,10,12-triene-5,17-dione	14.8073	13.8062	16.8606	12.9786	13.1233	13.87	13.8167	15.7522	18.1998	15.7849	17.6435	16.994	15.8513	15.9977
X18592	1.27656	0.0925687	1.38697	0.178373	0.0346665	1.07075	0.93951	-0.995902	0.403935	-1.44408	0.3747	-0.927814	-0.822477	-1.56776	255.069	30.915	C12H14O4S	False	4.25444	0.00125725	0.0623242	-4.25444	Cyclopropanecarboxylic acid, 1-((4-methylphenyl)sulfonyl)-, methyl ester	14.9973	11.4567	15.3275	11.7133	11.2835	14.3819	13.9894	8.20171	12.3878	6.86145	12.3004	8.40532	8.72032	6.4916
X58844	0.0768081	-0.404365	-2	-0.157223	-0.778845	0.00711505	-1.66284	0.0948597	0.117315	1.14982	0.856447	0.580937	0.629693	1.5468	561.3	21.614	C25H42N6O7	False	4.42211	0.00126714	0.0627447	4.42211	YTKK	13.1669	11.6703	6.53125	12.439	10.5054	12.9502	7.75576	13.2231	13.2929	16.5045	15.592	14.735	14.8867	17.7393
X1161	0.508741	0.789984	1.19751	0.7554	0.302319	0.879142	0.711926	-0.944316	0.5572	-2	-0.621899	-0.314255	-0.656601	-0.684411	80.9481	9.134	OS2	False	1.30395	0.00126885	0.0627595	-1.30395	Disulfur monoxide	16.8183	17.0677	17.4292	17.0371	16.6352	17.1468	16.9985	15.5293	16.8612	14.1665	15.8153	16.0882	15.7846	15.7599
X56765	-0.662408	-0.394544	0.234202	-0.652268	-0.308583	-0.964799	-2	-0.244308	0.376386	0.743801	1.17302	0.959137	0.596999	1.45919	544.283	21.262	C29H45O6S	False	1.71439	0.00127051	0.0627718	1.71439	(1S,2S,5R,6R,9R,10R,13S,15S)-6,10-dimethyl-5-[(2R,3E,5R)-4,5,6-trimethylhept-3-en-2-yl]-16,17-dioxapentacyclo[13.2.2.0^{1,9}.0^{2,6}.0^{10,15}]nonadec-18-en-13-yl sulfate	12.868	13.1854	13.9304	12.88	13.2872	12.5097	10.909	13.3634	14.0988	14.5342	15.0427	14.7893	14.3602	15.3818
X61902	-1.60995	0.0537198	0.33863	-0.150199	-0.714548	-0.9201	-2	0.408301	0.0714575	0.837436	0.574184	1.2725	1.19839	0.685383	587.266	19.05	C34H37ClN6	False	1.84647	0.00127789	0.0630666	1.84647	N~9~,N~9'~-(Octane-1,8-diyl)di(acridine-3,9-diamine)--hydrogen chloride (1/1)	12.4915	14.6216	14.9864	14.3605	13.638	13.3748	11.9343	15.0756	14.6443	15.625	15.288	16.182	16.0871	15.4303
X60565	-0.147623	-0.190882	-0.506002	-0.890243	-0.362109	-1.38843	-1.67287	-0.0475114	-0.313091	0.79304	1.46475	0.708984	1.72442	0.827576	575.805	23.247	C14H7Br3F3N3O4	False	1.25232	0.00128197	0.0631979	1.25232	Bromethalin|C18697	14.7431	14.7063	14.4385	14.112	14.5608	13.6887	13.447	14.8281	14.6025	15.5424	16.1132	15.471	16.3338	15.5717
X26594	1.65785	0.383013	1.6938	-0.539144	0.731168	-0.169531	1.37302	-0.545558	-0.738422	-1.0637	-0.165116	-0.575759	-0.821499	-1.22012	312.215	45.683	C16H27N5	True	1.33988	0.00128683	0.0633677	-1.33988	9-undecylpurin-6-amine	17.3457	16.1804	17.3786	15.3374	16.4986	15.6753	17.0854	15.3316	15.1553	14.8579	15.6793	15.304	15.0793	14.7149
X74743	-0.331668	-1.03281	0.653786	-1.23975	-0.493575	-0.778761	-1.77061	-0.0598969	1.22867	-0.153315	0.86297	1.10296	0.586668	1.42533	721.361	20.034	C32H58O16	True	2.78376	0.00129308	0.063453	2.78376	cuscutic acid A2	11.9609	10.5928	13.8837	10.189	11.645	11.0885	9.15319	12.4912	15.0054	12.3089	14.2919	14.7601	13.7527	15.3892
X57801	0.138225	-0.229941	-0.273038	-0.77998	-1.20459	-1.98422	-0.736066	-0.23124	0.755021	1.24882	1.46047	1.32635	0.489339	0.0208418	553.282	19.704	C34H32N8	False	1.63384	0.00129326	0.063453	1.63384	2-N,4-N,6-N,8-N-tetrakis(3-methylphenyl)pyrimido[5,4-d]pyrimidine-2,4,6,8-tetramine	15.7764	15.3611	15.3125	14.7407	14.2618	13.3824	14.7902	15.3597	16.4722	17.0292	17.2679	17.1166	16.1725	15.644
X34409	-0.241671	-1.55511	-0.267449	0.233895	-1.9414	-1.01177	-0.275134	0.331258	0.849843	0.781688	0.0159621	1.27888	1.54391	0.257096	370.294	40.688	C19H41NO4	True	1.71242	0.00129462	0.063453	1.71242	N-Decyl-2,5,8,11-tetraoxatridecan-13-amine	19.108	17.5518	19.0774	19.6714	17.0941	18.1956	19.0683	19.7868	20.4012	20.3204	19.4132	20.9095	21.2235	19.6989
X16956	1.47095	1.39869	0.288359	0.247251	0.927772	0.751253	-0.103119	-1.41772	-1.66288	-1.28475	-0.256339	0.159082	-0.828825	0.310269	243.075	26.726	C9H17O4P	False	3.33523	0.0012948	0.063453	-3.33523	1,3-Propanediol, 2-(hydroxymethyl)-2-pentyl-, cyclic phosphate (1:1)	18.1426	17.9732	15.3712	15.2748	16.8696	16.456	14.4537	11.373	10.7985	11.6846	14.0947	15.0682	12.7531	15.4225
X31612	1.20167	1.38729	-1.21166	0.471258	1.49834	0.931697	0.694377	-0.500118	-1.25178	-0.136695	-0.594532	-0.821106	-1.04673	-0.622012	348.273	35.031	C18H37NO5	False	3.9739	0.00129569	0.063453	-3.9739	(2R,3R,4R,5R)-2-hydroxymethyl-3,4-dihydroxy-5-[(10S)-10,13-dihydroxy-tridecyl]pyrrolidine	16.8062	17.3253	10.0565	14.7633	17.6359	16.0511	15.3874	12.0465	9.94426	13.063	11.7825	11.1488	10.5177	11.7056
X40083	-1.85542	-1.68134	-0.192033	-0.917856	-0.301009	0.179973	-0.678448	1.28814	1.00515	0.0833198	0.988284	0.879506	0.356901	0.844827	415.211	42.131	C18H31N4O5P	True	0.832429	0.00129767	0.0634803	0.832429	Phosphoric acid--N~1~,N~1~-diethyl-N~4~-(6-methoxyquinazolin-4-yl)pentane-1,4-diamine (1/1)	17.8729	17.9661	18.7628	18.3745	18.7045	18.9618	18.5026	19.5546	19.4033	18.9101	19.3942	19.336	19.0565	19.3175
X75452	1.55079	0.712305	-0.160349	0.177875	1.30036	1.32215	0.0678893	-1.00282	-1.14066	-1.47842	-0.726612	-0.188908	-1.06432	0.630718	731.902	25.55	C23H24I3N2	False	4.06351	0.00130063	0.0634841	-4.06351	1H-Imidazolium, 4,5-dihydro-2-phenyl-1,3-bis(phenylmethyl)-, (triiodide)	16.0278	13.6288	11.1321	12.0998	15.3113	15.3736	11.7851	8.72178	8.3274	7.36108	9.51202	11.0504	8.54584	13.3954
X66239	0.525952	-0.657166	-2	0.0664723	-1.31603	-0.526481	-0.827759	0.211361	0.585068	0.874482	0.187469	0.774787	1.16904	1.17952	625.294	18.566	C26H40N8O10	False	3.20948	0.00130178	0.0634841	3.20948	L-Alanyl-N~5~-(diaminomethylidene)-L-ornithyl-L-tyrosyl-L-threonyl-L-aspartic acid	13.925	11.2572	7.67299	12.8889	9.77156	11.5519	10.8726	13.2156	14.0583	14.7109	13.1618	14.4861	15.3751	15.3987
X45636	-0.278151	-0.281219	-0.892733	-0.532148	-1.3654	-0.66854	-1.06963	-0.38999	0.410516	2	1.4712	1.32548	0.0976971	0.16566	456.747	19.524	C12Cl8O2	False	1.51049	0.00130202	0.0634841	1.51049	1,2,3,4,6,7,8,9-Octachlorodibenzo-p-dioxin|C18180	16.2586	16.2554	15.62	15.9947	15.1289	15.853	15.4362	16.1424	16.9742	18.6334	18.0764	17.925	16.6492	16.7198
X77977	-0.14615	-0.118705	-2	-0.337503	-0.889232	0.269375	-1.55458	0.325534	0.253561	0.828986	1.00551	0.822067	0.272181	1.46273	773.45	20.965	C41H66O12	True	3.85148	0.00131169	0.0638856	3.85148	alpha-Hederin|C08954	11.0613	11.1358	5.50817	10.5424	9.0461	12.1882	7.24168	12.3405	12.1454	13.7059	14.1846	13.6871	12.1958	15.4246
X56630	-0.902774	-0.445086	-0.804692	-1.88511	0.510189	-0.960175	-0.529263	1.2317	1.24602	1.42951	0.806823	-0.304568	-0.0718148	0.679234	543.307	21.195	C30H42N2O7	False	2.1232	0.00131405	0.0639057	2.1232	Deacetyl-lappaconitin	13.3767	14.0547	13.522	11.9217	15.4697	13.2917	13.93	16.5384	16.5596	16.8314	15.909	14.2628	14.6076	15.72
X41077	-0.187869	-1.47724	-0.285313	0.32588	-1.08046	-0.453283	-1.86302	0.447129	0.775667	0.703356	-0.366681	0.777994	1.10352	1.58032	422.759	22.361	C7H4Cl8O2	False	2.05514	0.00131497	0.0639057	2.05514	2,2,4,4-Tetrachloro-1-(dichloromehyl)-5-(dichloromethylene)-1,3-cyclopentenediol,	17.8308	15.9837	17.6912	18.5667	16.5521	17.4505	15.4311	18.7404	19.211	19.1074	17.5746	19.2143	19.6807	20.3637
X4057	-0.996773	0.561623	-0.0580568	-1.04509	-0.112764	-1.60816	-1.70422	1.14938	-0.132165	0.76161	1.41918	0.490282	0.407194	0.867962	118.035	5.438	H7NO6	False	4.52779	0.00131863	0.0639455	4.52779	Nitric acid--water (1/3)	8.5593	13.5349	11.5564	8.40504	11.3818	6.60727	6.30057	15.4115	11.3198	14.1735	16.2729	13.3072	13.0419	14.513
X54224	-1.10222	0.503929	-0.700861	0.208106	-0.674952	-1.61994	-1.71664	0.498088	-0.131565	1.19875	1.13604	0.731302	0.989647	0.680313	524.333	38.19	C28H41N7O3	True	1.41904	0.00131866	0.0639455	1.41904	PD-173074	14.212	15.7754	14.6027	15.4874	14.6279	13.7081	13.614	15.7697	15.1568	16.4517	16.3906	15.9967	16.2481	15.947
X26595	0.854398	0.619847	1.63601	-0.295518	0.652983	-0.108407	1.87642	-0.24206	-0.786617	-1.13879	-0.282217	-0.366557	-1.05535	-1.36413	312.215	45.545	C16H27N5	False	1.05697	0.00132262	0.0640012	-1.05697	9-undecylpurin-6-amine	16.4759	16.3102	17.0282	15.6634	16.3336	15.7956	17.198	15.7012	15.3164	15.0676	15.6728	15.6132	15.1265	14.9084
X27964	0.227656	1.19917	1.93655	0.292677	1.49592	0.243093	-0.114692	0.0360354	-0.656247	-1.21649	-0.915671	-1.30056	-0.904604	-0.32284	321.239	47.58	C16H36N2S2	True	0.989608	0.00132268	0.0640012	-0.989608	N,N'-Disulfanediylbis(N-butylbutan-1-amine)	17.636	18.2733	18.757	17.6787	18.4679	17.6461	17.4115	17.5103	17.0562	16.6887	16.8861	16.6336	16.8933	17.2749
X41244	-1.37786	-0.480653	0.0225634	0.0592121	-1.74746	-1.16233	-0.435583	1.06811	0.266445	0.299366	1.35628	0.925717	1.4825	-0.276304	424.208	27.33	C20H29N3O7	True	1.33375	0.0013261	0.064097	1.33375	Amicoumacin A	19.7837	20.6013	21.0599	21.0933	19.4468	19.9801	20.6424	22.0128	21.2822	21.3122	22.2755	21.883	22.3905	20.7876
X8037	0.66927	1.9383	-0.0500832	0.406998	1.06242	-0.232398	1.1675	0.301538	-1.06644	0.0576821	-1.33734	-1.2876	-0.621244	-1.0086	164.029	35.888	C6H10ClNS	False	4.43102	0.00132795	0.0641171	-4.43102	N-Methyl-1-(thiophen-2-yl)methanamine--hydrogen chloride (1/1)	11.6735	15.6398	9.42514	10.8537	12.9022	8.85532	13.2306	10.5241	6.24855	9.76195	5.40187	5.55733	7.63999	6.42931
X23721	1.6399	1.14901	0.0194119	-0.110478	1.65283	0.773554	-0.139267	-1.09644	-0.528586	-1.46083	-0.39636	-0.533515	-1.22664	0.257404	292.26	44.721	C17H35NO	False	2.72142	0.001338	0.0645323	-2.72142	Oxime-Heptadecanal	17.6155	16.6776	14.5192	14.271	17.6402	15.9602	14.216	12.3871	13.4721	11.6908	13.7248	13.4627	12.1383	14.9739
X46561	-0.671108	-0.614775	-1.00052	-1.14573	-0.849249	-0.896181	0.0691192	0.113049	0.84697	1.31303	1.42996	1.02883	1.35028	-0.973681	463.883	20.538	[C18H14Br2N3O2]+	False	1.36812	0.00134489	0.0647947	1.36812	w/o MS2:3-dihydro-7,8-dehydrodiscorhabdin C (+2)	14.7495	14.8023	14.4407	14.3046	14.5825	14.5385	15.4434	15.4845	16.1725	16.6093	16.719	16.3429	16.6443	14.4659
X62523	0.0446714	-0.702181	-2	-0.0205206	-1.36703	0.404985	-1.16091	0.462109	0.907041	1.30797	0.456036	0.700362	0.131739	0.996371	592.27	20.14	C34H41NO6S	False	3.90245	0.00134941	0.0648704	3.90245	thiaplidiaquinone A	14.2454	12.1894	8.17449	14.0659	10.3592	15.2372	10.9266	15.3945	16.6193	17.723	15.3778	16.0504	14.485	16.8652
X22845	0.500017	-1.73525	-0.741878	-0.473919	-0.850502	-1.14473	-0.543551	-0.593413	1.15471	1.31173	0.938385	0.987516	1.17151	0.0193728	286.143	42.989	C12H20ClN5O	True	2.49996	0.00135009	0.0648704	2.49996	1,3,5-Triazin-2-amine, N-cyclopropyl-4-ethyl-6-(4-morpholinyl)-, monohydrochloride	19.0063	15.0866	16.8286	17.2985	16.6381	16.1222	17.1764	17.0889	20.1543	20.4297	19.775	19.8612	20.1838	18.1635
X56346	-0.807294	-0.802171	0.0894036	-1.3819	-1.47511	-0.735178	0.140497	0.678872	1.26938	0.757657	1.59636	1.2591	-0.0743482	-0.515274	541.266	19.991	C28H36N4O7	False	3.15288	0.00135083	0.0648704	3.15288	Safracin B	13.8424	13.8538	15.8327	12.5671	12.3602	14.0025	15.9461	17.141	18.4517	17.3159	19.1775	18.4289	15.4692	14.4906
X49393	0.204145	-0.0565023	0.308715	-2	-1.27806	-1.1571	-0.781452	0.0319011	0.899065	0.496992	1.14714	0.961556	0.999701	0.416425	485.276	19.235	C25H34N8O	False	4.89316	0.00135738	0.0650479	4.89316	Acetamide, N-[2-[(1-butyl-4,5-dicyano-1H-imidazol-2-yl)azo]-5-(dibutylamino)phenyl]-	16.5672	15.6659	16.9288	8.27987	11.4419	11.8602	13.1591	15.9716	18.9701	17.5798	19.828	19.1862	19.3181	17.3012
X74881	-1.14448	-0.841226	-0.908658	-0.476901	-0.468434	0.711097	-1.87285	0.106777	0.4105	1.4257	0.871429	0.874234	-0.0848109	1.39762	723.048	21.086	C30H27N3O15	False	2.21551	0.00135744	0.0650479	2.21551	w/o MS2:Enterobactin [M-H2+Fe]	12.4561	12.9263	12.8217	13.4911	13.5042	15.333	11.3268	14.3961	14.8669	16.4409	15.5816	15.5859	14.099	16.3974
X58191	-0.438059	-0.870822	0.313167	-1.48538	-1.01421	-1.3575	-0.166448	0.548943	1.59921	0.44266	1.39202	1.09354	0.544277	-0.601403	556.271	20.046	C25H43NO11	False	1.94314	0.00136164	0.0651788	1.94314	pederin	16.6183	16.0319	17.6362	15.1992	15.8376	15.3724	16.9863	17.9556	19.3787	17.8116	19.098	18.6935	17.9493	16.3969
X16372	-0.157678	-2	-0.813988	-0.591424	-0.422555	-0.331822	-0.679296	0.991473	1.22035	1.35575	1.38241	-0.185642	-0.17541	0.556417	238.119	44.023	C11H12N2O3	False	1.23001	0.00136435	0.0652384	1.23001	5-Hydroxy-L-tryptophan|C00643	17.5245	15.8587	16.9754	17.1616	17.3029	17.3788	17.0881	18.486	18.6775	18.7908	18.8131	17.5011	17.5097	18.122
X74727	-0.246879	-0.135891	-1.62965	-0.168748	-0.384542	-0.584869	-1.83851	-0.158055	-0.0662089	1.53727	0.29103	0.948451	1.11594	1.32066	721.026	21.147	C28H30Br2N6O3S2	False	2.42429	0.00136711	0.0652662	2.42429	Carbamimidothioic acid, phenyl-, (5-ethyldihydro-2,4,6-trioxo-5-phenyl-1,3(2H,4H)-pyrimidinediyl)bis(methylene)ester, dihydrobromide	13.0551	13.2438	10.7034	13.188	12.821	12.4803	10.3482	13.2061	13.3623	16.0894	13.9699	15.088	15.3728	15.721
X9386	0.233123	1.21895	1.28141	1.0523	0.910963	0.355016	0.334118	0.132597	-0.593307	-2	-1.14845	-0.979126	-0.945829	0.166509	178.049	28.94	C4H8ClN5O	False	0.863884	0.00136786	0.0652662	-0.863884	6H-1,2,4,5-Tetrazepin-6-one, 3-amino-2,5-dihydro-7-methyl-, monohydrochloride	13.4971	14.0505	14.0856	13.957	13.8776	13.5655	13.5538	13.4407	13.0331	12.2332	12.7215	12.8165	12.8352	13.4597
X8874	0.650314	0.429937	0.704836	1.04733	0.9483	-0.0878122	1.30949	-0.171158	0.277113	-1.00376	-1.72114	-0.490754	0.070725	-1.96342	172.996	6.269	C6H2N2O3	False	2.15168	0.00136993	0.0652949	-2.15168	Furo(3,4-b)pyrazine-5,7-dione	16.5816	16.2498	16.6637	17.1793	17.0302	15.4704	17.574	15.3449	16.0198	14.0915	13.0115	14.8638	15.7091	12.6467
X41615	-1.70704	-1.69965	0.37949	-0.243248	-0.712309	-0.556042	-0.905331	1.08039	0.372027	0.108764	0.563531	1.01944	1.28882	1.01116	426.297	40.086	C25H41NO3	True	0.816879	0.00137898	0.0656563	0.816879	(2S)-2-[(1-hydroxyhexadecylidene)amino]-3-phenylpropanoic acid	17.2439	17.2477	18.3396	18.0126	17.7663	17.8483	17.6649	18.7077	18.3357	18.1975	18.4363	18.6757	18.8172	18.6714
X5234	0.346923	-0.423775	-1.73672	-1.39371	-0.178615	-1.16152	-0.819324	0.0312881	0.59843	1.18995	0.339894	0.694694	1.53877	0.973708	132.065	3.007	C6H9N2	False	0.876726	0.00138366	0.0656984	0.876726	1-ethenyl-3-methylimidazol-3-ium	16.39	15.9494	15.1987	15.3948	16.0895	15.5276	15.7232	16.2096	16.5338	16.8721	16.386	16.5889	17.0715	16.7484
X6141	0.240209	1.59838	0.244835	0.378082	0.795975	0.54886	1.18291	-1.58278	-0.603385	-0.223495	0.000717673	0.378354	-1.02588	-1.93279	142.158	36.59	C9H19N	True	2.33862	0.0013837	0.0656984	-2.33862	methyl(6-methylhept-5-en-2-yl)amine	14.9038	17.132	14.9114	15.13	15.8156	15.4102	16.4504	11.9131	13.5199	14.1431	14.5109	15.1305	12.8268	11.3389
X51828	-0.0620968	-0.564509	-0.50413	-0.804309	-0.670423	-1.7268	-0.706772	-0.482656	0.402107	2	1.43752	0.379701	1.00323	0.257705	505.259	22.683	C24H36N6O4S	False	1.69529	0.001388	0.0656984	1.69529	Bis(1H-benzimidazole-1-pentylammonium) sulphate	15.7678	15.1762	15.2473	14.8938	15.0515	13.8076	15.0087	15.2726	16.3144	18.2447	17.5336	16.288	17.0222	16.1444
X9387	0.949568	1.1651	0.358541	-0.433633	1.56058	0.259943	1.17763	0.278822	-0.20459	-1.06119	-0.351273	-0.872951	-1.86529	-0.961263	178.049	30.643	C4H8ClN5O	False	1.70551	0.00138804	0.0656984	-1.70551	6H-1,2,4,5-Tetrazepin-6-one, 3-amino-2,5-dihydro-7-methyl-, monohydrochloride	14.2913	14.5467	13.591	12.6523	15.0153	13.4742	14.5615	13.4965	12.9237	11.9087	12.7499	12.1318	10.9559	12.0271
X48741	-0.69675	-0.625899	-0.394027	-0.974548	-0.979891	-1.66259	0.218154	0.127961	0.622936	1.67913	1.7379	0.921992	0.287789	-0.26215	480.279	21.619	C21H39N5O6	False	1.30432	0.00138807	0.0656984	1.30432	Pyrrolidone carboxylic acid ethyl capryloyl arginate	14.9793	15.0425	15.2494	14.7314	14.7266	14.1174	15.7957	15.7152	16.157	17.0995	17.152	16.4238	15.8579	15.3671
X61846	1.10603	0.396727	-0.305531	1.28325	0.411561	1.687	0.507635	-1.1148	-0.0454766	0.104839	-1.81965	-0.400052	-0.56054	-1.251	586.8	19.882	C15H20Br4O3	False	1.41561	0.00138871	0.0656984	-1.41561	(2S,3R,5R)-2-[(R)-bromo[(2R,3R,5S,6R)-3,5-dibromo-6-ethyloxan-2-yl]methyl]-5-[(1R)-1-bromoprop-2-yn-1-yl]oxolan-3-ol	15.208	14.5171	13.8331	15.3807	14.5316	15.7739	14.6252	13.0449	14.0864	14.2328	12.3583	13.741	13.5847	12.9122
X73734	-0.939065	0.629561	-1.33646	-1.87626	-1.17465	-0.661388	0.405538	1.06364	0.21346	0.584845	1.09312	0.937669	0.903332	0.15666	706.367	20.646	C37H53N3O9	False	3.7875	0.00139587	0.0659669	3.7875	curromycin B	8.16055	12.3591	7.0969	5.6521	7.52999	8.90377	11.7595	13.5209	11.2454	12.2394	13.5998	13.1837	13.0918	11.0933
X16349	1.40785	0.906362	-0.463254	-0.347473	1.47919	1.36368	0.769292	-0.374784	-0.876003	0.0629657	-0.793047	-0.947187	-1.53596	-0.651628	238.106	37.152	C11H13N5	False	1.28693	0.00140979	0.0665544	-1.28693	Pyrimido(4,5-c)isoquinoline-1,3-diamine, 7,8,9,10-tetrahydro-	16.1008	15.6592	14.4533	14.5552	16.1636	16.0619	15.5385	14.5312	14.0899	14.9166	14.1629	14.0272	13.5088	14.2874
X70870	0.0648983	1.07344	0.0712606	1.66803	0.292647	1.28767	0.524852	-0.905627	-0.813036	-0.915031	-1.48634	0.04938	0.566383	-1.47852	672.373	20.287	C37H53NO10	True	2.31292	0.00141895	0.0668916	-2.31292	varatroylzygadenine	11.9817	13.6202	11.992	14.5862	12.3517	13.9682	12.7289	10.4049	10.5554	10.3897	9.46149	11.9565	12.7964	9.4742
X17620	0.509491	1.28591	0.316128	0.173312	-0.106684	0.666784	2	-0.0986488	-1.43262	-0.418077	-0.666992	-0.207805	-0.836682	-1.42823	247.651	23.121	C30H35N7O4S	False	1.37493	0.00141994	0.0668916	-1.37493	w/o MS2:Imatinib Mesylate	14.1729	14.9071	13.99	13.855	13.5902	14.3216	15.8131	13.5978	12.3364	13.2958	13.0604	13.4946	12.8999	12.3405
X22842	1.57323	1.36451	0.955246	0.629314	-0.689841	0.952807	0.153416	-1.14026	-1.30124	-1.09157	-0.807988	0.264846	-1.00891	0.146436	286.142	49.383	C12H20ClN5O	True	4.75686	0.00142658	0.0671337	-4.75686	1,3,5-Triazin-2-amine, N-cyclopropyl-4-ethyl-6-(4-morpholinyl)-, monohydrochloride	16.8064	16.1028	14.7231	13.6243	9.17727	14.7149	12.02	7.65885	7.11615	7.82299	8.77898	12.3957	8.10164	11.9965
X77114	1.46577	0.669312	-1.08372	0.538774	1.09498	0.863004	1.3861	-0.984697	-0.941423	0.151495	-0.803946	-0.102707	-1.11829	-1.13466	759.716	26.416	C48H96O4	False	5.74168	0.00142843	0.0671368	-5.74168	Tridecyl 2,3-bis(hexadecyloxy)propanoate	15.5016	12.2578	5.1182	11.7262	13.9915	13.0467	15.1772	5.52148	5.69773	10.1489	6.25764	9.11361	4.9774	4.91071
X53631	1.28688	1.31991	0.607758	0.166675	-0.762669	1.00696	1.30844	-0.944445	-0.853365	-1.08414	-0.581202	0.644049	-0.820298	-1.29456	519.319	23.121	C30H44N2O4	False	5.6732	0.00143073	0.0671368	-5.6732	N~1~,N~2~-Bis[4-(octyloxy)phenyl]ethanediamide	14.9744	15.1073	12.2413	10.4662	6.72617	13.8479	15.0611	5.99464	6.36118	5.43244	7.45647	12.3874	6.49425	4.58563
X44484	-0.168964	-0.927623	0.952111	-1.39578	-1.50302	-0.995181	-0.975902	0.238353	1.41744	0.353233	0.895397	1.11565	0.0952889	0.898997	448.251	20.134	C29H29N5	False	1.8269	0.00143156	0.0671368	1.8269	2,6-Bis[3-(2,4,6-trimethylphenyl)-1H-pyrazol-1-yl]pyridine	15.8728	14.9054	17.3024	14.3084	14.1716	14.8192	14.8438	16.3922	17.8957	16.5387	17.23	17.5109	16.2098	17.2346
X75704	-1.29352	-0.52893	-0.206663	-0.803106	-1.30845	0.108757	-0.929061	-0.0820062	1.23881	1.32674	1.53495	1.39011	-0.426348	-0.0212874	735.376	20.569	C43H50N4O7	True	2.84068	0.00143267	0.0671368	2.84068	3'-Hydroxyvobtusine	11.7832	13.3155	13.9614	12.7661	11.7533	14.5935	12.5136	14.2112	16.8583	17.0345	17.4518	17.1615	13.5211	14.3329
X25496	1.7236	0.737462	1.21643	0.0847702	0.772368	-0.102315	1.23152	-0.660772	0.124287	-0.675913	-1.10736	-1.16817	-1.0258	-1.15011	304.247	46.075	C15H31N5	False	0.695775	0.00143544	0.0671957	-0.695775	(4,8,11-Trimethyl-1,4,8,11-tetraazacyclotetradecan-1-yl)acetonitrile	17.9558	17.5319	17.7378	17.2512	17.5469	17.1708	17.7443	16.9307	17.2682	16.9242	16.7387	16.7125	16.7737	16.7203
X19189	0.51921	1.29057	2	0.266018	0.702131	0.51978	-0.189326	-0.173299	-1.16001	-1.46768	-0.889385	-0.446098	-1.1862	0.154056	259.107	33.684	C9H12ClN5O	False	1.12899	0.00143909	0.0672958	-1.12899	Moxonidine|C07451	16.4816	17.0713	17.6597	16.288	16.6214	16.482	15.9399	15.9521	15.1978	14.9626	15.4047	15.7436	15.1777	16.2024
X33392	0.350985	-0.618487	-0.179791	-1.27577	-0.489901	-1.16508	-1.73195	-0.483516	1.00191	0.70698	1.63485	1.01761	0.488604	0.743556	362.213	19.983	C19H33NO2S	False	1.2816	0.00144109	0.0673187	1.2816	ircinamine	14.7402	13.8892	14.2743	13.3122	14.002	13.4094	12.9118	14.0076	15.3116	15.0527	15.8672	15.3253	14.861	15.0848
X33984	0.622841	-0.17166	0.965061	2	-0.173061	0.20893	1.42032	-0.504975	-0.576787	-0.884735	-0.871349	0.0373934	-0.813873	-1.43067	367.195	23.401	C21H26N4S	True	1.56499	0.0014455	0.0674543	-1.56499	as-Triazine-3(2H)-thione, 5,6-diphenyl-, compd. with triethylamine	15.726	14.8634	16.0975	17.4086	14.8619	15.2766	16.5918	14.5015	14.4235	14.0892	14.1037	15.0904	14.1661	13.4964
X62978	-0.0805599	-0.49686	0.148741	-0.533577	-0.832943	-0.880997	-2	-0.545021	0.784563	0.972058	0.846846	1.13811	0.591565	1.195	596.292	18.788	C24H47NO14	False	2.18735	0.00144837	0.0675175	2.18735	3,6,9,12,15,21,24,27,30,33-Decaoxa-18-azapentatriacontane-1,35-dioic acid	14.6198	13.9803	14.9721	13.9239	13.4639	13.3901	11.1994	13.9063	15.9489	16.237	16.0446	16.4921	15.6524	16.5795
X51442	-0.171713	-0.192996	0.542722	-0.520659	-1.18331	-1.24114	-2	-0.0623873	0.708513	0.500678	0.877656	1.18776	0.538468	1.19873	502.266	18.53	C25H35N5O6	False	3.16788	0.0014534	0.0676392	3.16788	astin G	15.1216	15.074	16.7221	14.3399	12.8555	12.7259	10.6175	15.3666	17.0935	16.6279	17.4724	18.1671	16.7126	18.1917
X37801	0.339719	-1.46642	0.104771	-1.05585	-0.921916	-1.0683	-0.897835	-0.819727	0.82895	0.91196	1.5327	1.16476	0.614217	0.732967	397.194	23.802	C15H24N8O5	False	2.5361	0.0014542	0.0676392	2.5361	N-{3-[(1R,3E,4R,6R,9R)-6-hydroxy-9-(2-hydroxy-4-imino-1,4-dihydropyrimidin-1-yl)-3-(hydroxyimino)-2,8-dioxa-5-azabicyclo[4.3.1]decan-4-yl]propyl}guanidine	15.6176	12.3891	15.1976	13.123	13.3624	13.1008	13.4055	13.5451	16.4921	16.6404	17.75	17.0923	16.1082	16.3205
X38970	0.100906	-0.844949	-1.12733	-1.48184	-0.482753	-0.785081	-1.18154	-0.243457	0.850185	1.26643	0.811206	0.608443	1.25836	1.25142	406.315	41.745	C22H39N5O2	False	0.647931	0.00145554	0.0676392	0.647931	5-Amino-N~1~,N~3~-bis[3-(diethylamino)propyl]benzene-1,3-dicarboxamide	16.6646	16.2949	16.1846	16.046	16.4365	16.3183	16.1634	16.53	16.9574	17.1201	16.9422	16.863	17.117	17.1142
X18616	-0.123403	0.586757	0.777353	1.85669	0.188452	0.785296	0.973615	0.602452	-0.821878	-0.714718	-0.864376	-0.38974	-1.90819	-0.948316	255.101	46.446	C10H23OPS2	False	1.55003	0.00145778	0.0676729	-1.55003	S,S-Di-tert-butyl ethylphosphonodithioate	13.3374	14.1011	14.306	15.4667	13.6727	14.3146	14.5171	14.1179	12.5862	12.7015	12.5405	13.0509	11.418	12.4502
X14665	-0.631174	-2	-0.611286	-0.389869	-1.51312	0.00727338	0.353416	0.635684	1.16843	0.76465	0.818978	1.1158	0.533822	0.00720163	225.09	45.449	C10H13ClN4	True	1.54886	0.00145958	0.0676858	1.54886	2-(Piperazin-1-yl)pyridine-4-carbonitrile--hydrogen chloride (1/1)	20.448	18.6978	20.4693	20.7073	19.5002	21.1341	21.506	21.8094	22.3819	21.9479	22.0063	22.3253	21.6999	21.134
X50158	0.710127	0.884075	-0.633944	0.639253	0.34896	0.774789	2	-0.379078	-0.609385	-0.291206	-1.33863	-0.696746	-1.23987	-0.514121	492.238	22.062	C21H37N3O8S	False	1.41961	0.00146201	0.0677281	-1.41961	17-Oxo-21-[(3aS,4S,6aR)-2-oxohexahydro-1H-thieno[3,4-d]imidazol-4-yl]-4,7,10,13-tetraoxa-16-azahenicosan-1-oic acid	14.193	14.3635	12.8756	14.1235	13.839	14.2564	15.7963	13.1254	12.8996	13.2115	12.1848	12.814	12.2816	12.993
X56901	-0.239388	0.978045	1.00633	0.665744	0.79744	0.883369	0.957086	0.786146	-0.220903	-1.20673	-1.93203	-1.22634	-0.795472	-0.453293	545.308	33.095	C29H46O8	False	1.51079	0.00147139	0.0680919	-1.51079	20-hydroxyecdysone, 3-acetate	12.8639	14.139	14.1686	13.8119	13.9498	14.0398	14.117	13.938	12.8832	11.8507	11.0911	11.8302	12.2815	12.6398
X41265	-0.107905	-0.704879	-0.595508	-0.405074	-1.02466	-2	-0.066632	-0.345571	0.310941	0.974262	1.18654	1.19333	1.62122	0.0355483	424.236	20.336	C26H31N3O	False	2.1805	0.00148264	0.0685416	2.1805	1-Piperazinepropanamine, N,N-diphenyl-4-(4-methoxyphenyl)-	16.0214	15.1059	15.2736	15.5657	14.6155	13.0099	16.0847	15.657	16.6638	17.6811	18.0066	18.0171	18.6733	16.2415
X45937	-0.751529	-1.44488	-1.30747	-0.424071	-1.04949	-0.619754	0.535479	1.06143	1.28277	1.0096	0.464396	1.13326	0.888346	-0.778084	459.254	20.338	C30H34O4	False	1.42836	0.00148637	0.0686327	1.42836	harunmadagascarin A	16.269	15.5842	15.7199	16.5924	15.9747	16.3991	17.5401	18.0596	18.2782	18.0084	17.4699	18.1305	17.8886	16.2428
X62067	-0.487885	-1.00216	-0.875825	-1.08007	-0.972556	-0.913786	0.251178	-0.312122	1.17316	1.50759	1.46658	1.17449	0.627615	-0.556206	588.293	20.437	C28H40F3N3O7	False	1.34594	0.0014877	0.0686327	1.34594	MK-812	15.0041	14.5273	14.6444	14.4551	14.5547	14.6092	15.6893	15.1671	16.5441	16.8541	16.8161	16.5453	16.0383	14.9408
X45555	0.575348	-1.34635	-0.613132	-0.978557	-0.302093	-1.48949	-0.860708	-0.500349	0.672057	1.56653	1.43008	0.321564	0.714209	0.810892	456.234	22.634	C21H33N3O8	False	1.7077	0.0014902	0.0686772	1.7077	pyloricidin C	13.8655	11.5752	12.4491	12.0135	12.8198	11.4046	12.154	12.5835	13.9808	15.0468	14.8842	13.5631	14.031	14.1462
X21591	2	0.785859	0.861664	-0.0589775	0.862525	0.764198	0.651601	-0.849913	-0.391202	-0.888028	-1.05332	-0.801947	-1.23654	-0.740981	277.178	45.725	C15H26O3	False	0.604738	0.00150018	0.0690417	-0.604738	Kikkanol A|C17603	17.9572	17.4924	17.5193	17.1925	17.5196	17.4847	17.4447	16.9117	17.0745	16.8981	16.8395	16.9287	16.7744	16.9503
X67644	1.48516	1.65499	0.673666	0.247101	-0.336799	1.19176	0.00417788	-1.25731	-0.922424	-0.520375	-0.559027	-0.873472	-1.37319	0.585732	639.017	24.819	C22H22Br2N10O2	False	5.51328	0.00150121	0.0690417	-5.51328	nagelamide I	14.988	15.6541	11.8053	10.1323	7.84226	13.8373	9.17957	4.23203	5.54544	7.12227	6.97068	5.73742	3.77753	11.4604
X82297	0.272758	-0.711915	-2	-0.0631996	-1.76102	-0.31964	-0.129032	0.57428	0.650393	1.35734	0.424948	0.970779	0.656843	0.303073	922.458	20.34	C42H73N3O15P2	True	3.23215	0.00150491	0.0691068	3.23215	CDP-DG(18:2(9Z,11Z)/i-12:0)	13.7374	11.4815	8.01351	12.9677	9.0779	12.3802	12.8169	14.4283	14.6026	16.2223	14.0861	15.3367	14.6174	13.8069
X24746	0.953986	0.134669	-0.271595	2	1.30118	0.0944354	0.963859	-0.653077	0.000737575	-0.680896	-0.82494	-1.50808	-0.466129	-1.07899	299.257	45.559	C18H36O4	True	1.02158	0.00150793	0.0691068	-1.02158	(9R,10R)-Dihydroxyoctadecanoic acid|C08314	17.7568	17.1946	16.9159	18.4984	17.995	17.167	17.7636	16.6542	17.1028	16.6351	16.5363	16.0676	16.7824	16.362
X45639	-0.295959	-0.730026	-0.601649	-0.845302	-1.499	-0.545232	-0.505829	-0.270492	1.05726	1.74575	1.4946	1.39643	-0.209022	-0.191529	456.747	19.456	C12Cl8O2	False	1.61849	0.00150873	0.0691068	1.61849	1,2,3,4,6,7,8,9-Octachlorodibenzo-p-dioxin|C18180	16.3701	15.8806	16.0253	15.7506	15.0134	16.089	16.1334	16.3988	17.8962	18.6726	18.3894	18.2787	16.4681	16.4879
X46058	-0.234714	-0.787343	-0.366164	-0.453894	-1.11146	-0.580499	-1.60787	-0.747879	0.0458805	1.04982	1.70335	1.23625	1.01223	0.842287	460.252	21.764	C20H39NO9	False	1.15199	0.00150883	0.0691068	1.15199	4-O-beta-D-glucopyranosyl-3-deoxy-alpha-1-C-(8-hydroxyloctyl)-1-deoxynojirimycin	16.0724	15.639	15.9693	15.9005	15.3849	15.8012	14.9956	15.67	16.2924	17.0796	17.5921	17.2258	17.0501	16.9169
X45412	-1.54613	-1.27773	0.757076	-0.673858	-1.06437	-0.807711	-0.313958	1.17907	1.22278	0.204194	1.26788	1.06052	-0.454676	0.446916	455.224	20.49	C24H36Cl2N2O2	False	3.91252	0.00151521	0.0692985	3.91252	Piperazine, 1-(2-(2-(diphenylmethoxy)ethoxy)ethyl)-2,4,5-trimethyl-, dihydrochloride, (E)-	9.28731	10.0333	15.6891	11.7118	10.6264	11.3398	12.7122	16.8621	16.9836	14.1524	17.1089	16.5326	12.321	14.827
X39305	1.31143	1.58879	0.108458	-0.363565	1.40597	0.935203	-0.0665241	-0.722556	-1.21941	-1.20632	-0.0846648	-0.703549	-1.29982	0.316556	409.122	47.323	C30H16O2	False	4.83911	0.00151689	0.0692985	-4.83911	9(10H)-Anthracenone, 10,10'-(1,2-ethenediylidene)bis-	16.148	17.1028	12.0066	10.3816	16.4735	14.8528	11.4042	9.14576	7.43527	7.48036	11.3418	9.21119	7.15845	12.723
X63124	-0.158212	-0.255847	-1.96205	0.369276	-0.992298	-0.172601	-1.75111	0.455016	0.312384	1.22473	0.0896683	0.679556	0.739987	1.4215	597.251	19.148	C40H34N2O2	False	4.31012	0.00151768	0.0692985	4.31012	N,N'-[Ethene-1,2-diyldi(4,1-phenylene)]bis[N-(4-methoxyphenyl)aniline]	12.3518	12.0526	6.8242	13.9682	9.79587	12.3077	7.47057	14.231	13.7939	16.5897	13.1114	14.9191	15.1042	17.1926
X65282	1.30052	1.97399	-0.0538111	1.02677	-0.0271651	0.743548	-0.0174395	-0.801737	-0.554602	0.0152268	-1.06471	-1.34476	-1.37037	0.174538	616.424	44.061	C34H59NO7	False	2.67099	0.00152626	0.0696158	-2.67099	Pamamycin-593	12.0639	13.3367	9.5043	11.5465	9.55466	11.0113	9.57304	8.09076	8.55784	9.63478	7.59376	7.06447	7.01609	9.93587
X73934	-1.47235	0.0488747	-0.683665	-0.201081	-0.603215	-0.650626	-1.37897	1.31019	-0.284888	0.744552	1.10701	1.18242	-0.624205	1.50594	709.385	20.915	C34H60O13S	False	2.85217	0.00152775	0.0696158	2.85217	Attenuatoside SIII	7.18806	10.2615	8.78147	9.75646	8.94401	8.84822	7.37671	12.8098	9.58714	11.667	12.3993	12.5516	8.9016	13.2052
X60940	-0.366729	-1.19312	-0.250511	-1.22215	-1.47085	-0.618925	0.0173034	-0.459499	1.5355	0.204733	1.35062	1.35667	1.02725	0.0897062	579.276	22.042	C41H36N2	False	1.22578	0.00154499	0.0702616	1.22578	9H-Fluorene-2,7-diamine, 9,9-diethyl-N,N,N',N'-tetraphenyl-	17.4501	16.7556	17.5478	16.7312	16.5222	17.2382	17.7729	17.3722	19.0488	17.9304	18.8934	18.8985	18.6216	17.8337
X13294	1.99694	0.504391	-0.641878	0.443777	1.74668	0.237782	0.786986	-0.332887	-0.728708	-1.18217	-0.515877	-0.931913	-0.309669	-1.07345	213.111	45.512	C10H14N4	False	1.32298	0.00154508	0.0702616	-1.32298	4,4',5,5'-Tetramethyl-2,2'-bisimidazole	16.6618	15.2999	14.254	15.2446	16.4334	15.0566	15.5577	14.5359	14.1747	13.761	14.3689	13.9893	14.5571	13.8602
X20198	0.710926	0.942068	-0.512171	0.175396	1.002	0.817245	2	-0.445753	-0.615878	-0.300854	-0.744011	-0.929245	-1.14557	-1.16487	267.156	42.719	C11H26N2OS2	True	0.856369	0.00155083	0.0702763	-0.856369	2,3-Bis[(2-methyl-2-sulfanylpropyl)amino]propan-1-ol	17.1773	17.3069	16.4916	16.8771	17.3405	17.2369	18.0182	16.5288	16.4335	16.6101	16.3616	16.2578	16.1365	16.1257
X60853	0.686094	-1.32096	-1.10696	-1.65195	-0.0762422	-1.21547	-0.224846	0.0920697	1.06562	0.773636	1.58283	0.24592	0.97912	0.171141	578.337	33.065	C32H43N5O5	True	5.43619	0.00155166	0.0702763	5.43619	Dihydroergocriptine	12.1661	4.38914	5.21835	3.10661	9.2122	4.7979	8.63638	9.86438	13.6367	12.5053	15.6408	10.4605	13.3015	10.1708
X567	-0.828133	-2	-0.0666037	-1.18706	-0.965723	0.234128	-0.159548	0.171566	0.944516	0.477365	1.19221	1.07514	0.691622	0.699445	73.0651	43.718	C4H8O	True	0.951237	0.00155323	0.0702763	0.951237	Butanal|C01412	17.1748	16.2551	17.6576	16.9473	17.0876	17.8482	17.5987	17.8086	18.2986	18.0024	18.4556	18.3814	18.1382	18.1432
X12421	0.209975	1.89734	0.379625	-0.132086	1.61699	0.487691	0.486084	0.361521	-1.48798	-0.955103	-1.43023	-0.746592	-0.412832	-0.274393	205.061	45.104	C5H14N2O3S	False	2.53282	0.00155331	0.0702763	-2.53282	3-[(2-Aminoethyl)amino]propane-1-sulfonic acid	13.9592	16.9837	14.2633	13.346	16.4812	14.457	14.4541	14.2308	10.9156	11.8708	11.0192	12.2446	12.8428	13.091
X40231	-1.04306	-0.0949042	-0.950366	0.49202	-1.24604	-1.83062	-0.274584	0.681064	0.331716	1.50851	0.607577	1.04503	1.15121	-0.37755	416.238	23.193	C31H29N	False	2.47431	0.00155461	0.0702763	2.47431	1-[4-(Triphenylethenyl)phenyl]piperidine	16.991	18.6506	17.1532	19.6779	16.6357	15.6124	18.3361	20.0088	19.3973	21.4572	19.8802	20.6459	20.8318	18.1559
X68913	0.785616	1.48044	1.07703	0.498259	0.131823	0.381769	0.643904	-0.377802	-1.51276	-1.2537	-1.7851	0.0275605	0.662159	-0.759206	650.412	32.188	C40H48N4O3	False	1.72892	0.00155486	0.0702763	-1.72892	Geissospermine|C09200	17.1096	17.9507	17.4623	16.7617	16.3181	16.6207	16.938	15.7012	14.3273	14.6409	13.9977	16.1919	16.9601	15.2395
X11468	-0.643307	-2	-0.742599	-0.566612	-0.588272	-0.223391	0.247996	0.477782	1.2739	0.758249	0.868844	0.780017	0.848109	0.104779	197.095	45.449	C6H16N2O3S	True	1.19944	0.00155818	0.0703548	1.19944	Propan-2-yl 2-(1-methylhydrazinyl)ethane-1-sulfonate	17.4546	15.8514	17.3731	17.5176	17.4998	17.7995	18.1866	18.3753	19.0291	18.6056	18.6965	18.6235	18.6794	18.069
X43661	-1.52418	-0.443895	0.579709	-1.4885	-1.12911	-0.829027	-0.0692505	1.47788	0.811179	0.0872724	1.41133	1.05724	0.0325085	0.0268409	441.694	20.005	C30H48O2	False	6.80953	0.00156469	0.0705717	6.80953	w/o MS2:Betulinaldehyde	5.18084	10.4307	15.4052	5.35423	7.10079	8.5591	12.2514	19.7701	16.5301	13.0121	19.4466	17.7259	12.7459	12.7184
X19794	1.17283	1.1822	0.719223	1.13898	-0.678799	1.25876	0.111741	-1.34273	-1.29555	-0.627273	-1.00028	-0.165512	-1.05523	0.58164	264.097	30.646	C11H11N7	True	6.32893	0.00156626	0.0705717	-6.32893	1-Benzyl-5-(2H-tetrazol-5-yl)-1H-imidazol-4-amine	16.4231	16.4655	14.3746	16.2703	8.06095	16.8112	11.6311	5.06257	5.27563	8.29365	6.6091	10.379	6.36094	13.7532
X15646	0.43634	-0.171389	1.14043	1.02712	1.10273	1.54745	0.00793888	-0.108588	0.292423	-1.71739	-1.40746	-0.347179	-1.0451	-0.757333	232.19	22.518	C12H25NO3	True	1.25328	0.00156797	0.0705717	-1.25328	Octanamide, N,N-bis(2-hydroxyethyl)-	16.3909	15.8673	16.9976	16.9	16.9652	17.3484	16.0218	15.9214	16.2669	14.5351	14.8022	15.7158	15.1144	15.3624
X44738	0.242722	-0.615657	0.0458922	-1.42393	-1.68521	-0.77196	-0.785086	-0.353225	0.954881	1.21628	1.17765	1.57157	0.121455	0.304624	450.235	18.834	C21H31N5O6	False	1.75181	0.00156932	0.0705717	1.75181	1,4,6,9-Tetraoxa-12,15,18,21,24-pentaazadifuro(2,1,5-a,z:2,1,5-h,i)cyclohexacosane-11,25-dione	17.1058	16.0518	16.8641	15.0592	14.7384	15.8598	15.8437	16.374	17.9803	18.3012	18.2538	18.7375	16.9569	17.1818
X381	1.40406	0.95295	-0.0251171	-0.0975816	1.4959	0.912316	0.357482	0.0827319	-0.59588	-0.797079	0.281277	-0.894927	-1.92792	-1.14821	71.0494	39.17	C4H6O	False	1.6916	0.00157132	0.0705904	-1.6916	3-Butyn-1-ol|C06146	15.3988	14.8646	13.7065	13.6207	15.5076	14.8165	14.1595	13.8342	13.0306	12.7924	14.0693	12.6765	11.4533	12.3766
X37179	1.17109	0.148229	1.01276	0.758583	-0.2044	0.853857	1.20178	-1.66147	-0.0515582	-0.746337	-0.562765	0.408254	-0.364947	-1.96306	392.238	20.773	C29H29N	False	2.50451	0.00157733	0.0707606	-2.50451	N,N-Bis(3,4-dimethylphenyl)-4'-methyl[1,1'-biphenyl]-4-amine	15.8626	14.0483	15.5818	15.131	13.4228	15.3	15.9171	10.8383	13.694	12.4616	12.7872	14.5096	13.1381	10.3034
X35477	0.578108	0.821789	-0.366611	0.934436	0.180246	0.846157	2	-0.485005	-0.852491	-0.276791	-1.5959	-0.127839	-0.101326	-1.58337	379.183	22.062	C14H26N4O8	False	1.5282	0.00157828	0.0707606	-1.5282	Carbamic acid, 1,2-ethanediylidenetetrakis-, tetraethyl ester	14.9063	15.1658	13.9002	15.2857	14.4826	15.1917	16.4509	13.7742	13.3828	13.9959	12.5912	14.1545	14.1827	12.6045
X74346	-1.80189	-1.08149	0.0791563	-0.319975	-1.14997	0.136671	-1.02876	0.559383	-0.283247	0.504564	1.30332	1.51639	0.463768	1.10208	715.375	25.929	C32H58O17	True	1.0665	0.00158661	0.0710382	1.0665	cuscutic acid A3	14.5593	15.0798	15.9184	15.63	15.0303	15.96	15.1179	16.2654	15.6566	16.2258	16.8029	16.9568	16.1963	16.6575
X77223	-1.06925	-0.725667	0.423919	-1.75438	-1.15679	-0.645603	0.0234126	1.09817	1.07951	0.568972	1.48418	1.08723	-0.482124	0.0684135	761.392	19.582	C32H54N10O10	True	5.17531	0.00158766	0.0710382	5.17531	HLDNLK	8.40152	9.67049	13.9163	5.87109	8.07819	9.9662	12.4371	16.4066	16.3377	14.4521	17.8323	16.3662	10.57	12.6033
X9132	1.00913	1.27181	-0.54494	0.187956	1.31029	1.49862	0.599885	-1.00075	-1.14897	-0.0938162	-1.35145	-1.12214	-0.0800854	-0.53556	175.075	37.551	C6H11ClN4	True	0.858617	0.00159403	0.0712518	-0.858617	Pyrazole-1-carboxamidine, 3,5-dimethyl-, monohydrochloride	19.3986	19.5466	18.5229	18.9359	19.5683	19.6745	19.168	18.266	18.1825	18.7771	18.0684	18.1976	18.7848	18.5281
X10966	0.433207	1.19645	0.805618	1.49092	0.722765	0.641939	0.305777	-0.276347	0.106141	-0.725804	-1.96092	-1.47724	-0.486014	-0.776495	192.182	43.563	C9H20NO2	False	0.70249	0.00160285	0.0715743	-0.70249	Muscarine|C07473	16.5454	16.8808	16.7091	17.0101	16.6727	16.6371	16.4895	16.2337	16.4018	16.0363	15.4937	15.7062	16.1416	16.014
X39976	0.00837045	1.69708	0.657255	1.44254	-0.136543	0.172817	1.1642	-0.277234	-1.28812	-1.13848	-1.46552	0.118582	0.0483893	-1.00334	414.283	42.138	C21H37N5O2	True	1.59509	0.00160856	0.0717203	-1.59509	Theophylline, 7-(2-(dodecylamino)ethyl)-	14.6868	16.5702	15.4105	16.2863	14.5251	14.8702	15.9758	14.3682	13.2408	13.4077	13.0429	14.8097	14.7314	13.5584
X32730	-0.982029	-1.02447	-0.991333	-0.272992	-1.81716	-0.12561	0.179006	-0.270741	0.706292	1.92495	0.814749	1.07803	0.682339	0.098981	357.217	21.91	C21H25NO3	False	1.43015	0.00161199	0.0717203	1.43015	Nalmefene|C08027	16.8128	16.7706	16.8036	17.5178	15.9825	17.6643	17.9672	17.52	18.4914	19.703	18.5992	18.861	18.4676	17.8876
X47418	-0.20255	-0.527838	0.502002	-0.618956	-0.859858	-1.76059	-1.59367	0.0500324	1.51701	0.907375	1.15451	0.874845	-0.0989862	0.656677	470.225	19.882	C20H31N5O8	False	1.31732	0.00161451	0.0717203	1.31732	1H-Purine-2,6-dione, 3,7-dihydro-7-(2-(cyclohexylmethylamino)ethyl)-1,3-dimethyl-, (R-(R*,R*))-2,3-dihydroxybutanedioate (1:1)	14.3717	14.0754	15.0135	13.9924	13.7729	12.9524	13.1045	14.6018	15.9381	15.3827	15.6078	15.3531	14.466	15.1544
X1519	0.128549	-0.298942	-1.70013	-1.41399	0.546595	-1.11712	-1.20558	0.217654	0.709021	1.13433	0.679349	-0.000413377	1.24115	1.07954	84.0446	2.878	C4H5NO	False	1.31982	0.00161523	0.0717203	1.31982	Nitrile-4-Oxobutanoic acid	16.1699	15.7796	14.5006	14.7618	16.5515	15.0328	14.9521	16.2512	16.6997	17.0879	16.6726	16.0521	17.1854	17.0379
X77494	0.0720635	-0.644914	-1.31886	-0.983184	-0.426656	0.00365046	-1.63638	-0.586696	0.0964088	1.48268	0.614809	1.07554	0.683209	1.56833	765.734	21.669	C49H96O5	False	2.50707	0.00161575	0.0717203	2.50707	(2S)-1-(docosanoyloxy)-3-hydroxypropan-2-yl tetracosanoate	13.3031	12.0281	10.8296	11.4265	12.4162	13.1815	10.265	12.1316	13.3464	15.8117	14.2683	15.0876	14.3899	15.964
X11858	0.366915	1.93593	-0.57227	1.03197	1.15288	0.450212	0.682612	0.11328	-1.46335	-0.0721084	-1.35991	-0.781198	-0.689205	-0.795768	200.142	42.291	C14H17N	True	1.36697	0.00161578	0.0717203	-1.36697	8-Aethyl-2,3,4-trimethyl-chinolin	15.9333	17.4203	15.0432	16.5636	16.6782	16.0123	16.2325	15.6929	14.1987	15.5172	14.2967	14.8452	14.9324	14.8314
X30687	0.923525	2	-0.339249	0.889768	0.584793	0.20381	1.11707	-0.545585	-1.14792	-0.634629	-1.23924	-0.75591	-0.0198103	-1.10249	341.194	42.138	C17H26N4O2	True	0.773972	0.00161996	0.0717615	-0.773972	1-(2-ethoxyethyl)-2-(4-methyl-1,4-diazepan-1-yl)-1H-1,3-benzodiazol-5-ol	16.7214	17.2896	16.0932	16.7046	16.5529	16.3634	16.8177	15.9906	15.691	15.9463	15.6455	15.886	16.2521	15.7135
X9514	-0.471691	-1.72345	-0.410144	-0.266561	-1.55259	-0.806217	-0.459317	1.13141	1.58824	0.478157	1.01153	-0.0891771	0.815732	0.754084	179.106	35.7	C11H14O2	True	0.666424	0.00162145	0.0717615	0.666424	benzyl 2-methylpropanoate	20.575	20.0618	20.6002	20.6591	20.1319	20.4378	20.5801	21.2321	21.4194	20.9643	21.183	20.7318	21.1027	21.0775
X31156	-1.2917	-1.59102	0.024898	0.723575	-0.825612	-0.78606	-1.19544	1.28511	1.29915	0.695322	-0.349142	0.269759	0.954637	0.786519	344.278	38.94	C18H35N5	True	2.30599	0.00162311	0.0717615	2.30599	6-Pentadecyl-1,3,5-triazine-2,4-diamine	17.9778	17.4889	20.1283	21.2695	18.7391	18.8037	18.1351	22.1867	22.2096	21.2233	19.5174	20.5282	21.6469	21.3723
X14272	-0.944219	-1.02177	-1.40125	-0.680699	-0.494754	-1.10593	0.161375	1.01677	1.43864	1.43941	1.00434	-0.12096	0.943409	-0.234359	221.153	44.701	C8H21N4OP	True	0.750361	0.00162315	0.0717615	0.750361	N-[Tris(dimethylamino)-lambda~5~-phosphanylidene]acetamide	17.8924	17.8553	17.6736	18.0185	18.1075	17.815	18.4215	18.8309	19.0328	19.0332	18.825	18.2864	18.7958	18.2321
X81551	-1.07375	0.915494	-1.19212	-2	-0.643885	-0.407455	-0.234252	0.847103	0.23648	0.619189	0.756281	0.898294	0.786063	0.773107	881.435	20.533	C44H64O18	True	3.06689	0.00162818	0.0718568	3.06689	w/o MS2:NCGC00385549-01_C44H64O18_Olean-12-en-29-oic acid, 22-(acetyloxy)-3-[(2-O-hexopyranuronosylhexopyranuronosyl)oxy]-11-oxo-	9.95386	14.2969	9.69543	7.31908	10.8924	11.4086	11.7867	14.1476	12.8145	13.65	13.9493	14.2594	14.0143	13.9861
X24003	-1.27788	-2	0.139912	-0.458748	-1.261	0.186301	-0.338928	1.14914	1.33585	0.776459	0.991672	0.47352	0.0321423	0.34073	294.226	40.625	C13H29N5O	True	1.1914	0.00162853	0.0718568	1.1914	N-(6-Aminohexyl)-6-[(E)-(hydrazinylmethylidene)amino]hexanamide	21.862	21.1986	23.0213	22.5318	21.8758	23.0592	22.6298	23.8466	23.9992	23.5418	23.7178	23.2941	22.9332	23.1855
X45402	1.09636	0.380728	1.94368	0.448516	1.08062	0.371646	-0.364601	-0.522022	-0.800013	-1.34258	-1.38645	-1.20033	-0.0912819	0.385727	455.223	20.129	C24H36Cl2N2O2	False	2.00035	0.00163697	0.0721576	-2.00035	Piperazine, 1-(2-(2-(diphenylmethoxy)ethoxy)ethyl)-2,4,5-trimethyl-, dihydrochloride, (E)-	17.0495	16.0388	18.2463	16.1345	17.0273	16.0259	14.9861	14.7637	14.3711	13.6048	13.5428	13.8057	15.3721	16.0458
X30453	1.21724	0.999002	0.155781	-0.231425	1.47843	0.836745	1.13419	-0.346634	-0.846773	-0.516763	-0.216693	-1.55103	-1.54742	-0.564653	339.25	43.514	C18H36O4	False	0.700962	0.00164012	0.0722252	-0.700962	1,3-dihydroxypropan-2-yl pentadecanoate	16.664	16.5682	16.1982	16.0282	16.7787	16.497	16.6276	15.9777	15.7582	15.903	16.0347	15.4491	15.4507	15.882
X68437	0.126324	-1.3447	-2	-0.322677	-0.951361	-0.369797	-0.0647471	-0.454112	0.903971	1.35775	0.856509	1.34215	0.680933	0.262453	646.348	22.871	C30H49N5O9	False	2.07638	0.00164714	0.0724629	2.07638	w/o MS2:NCGC00380598-01_C30H49N5O9_3-(3-sec-Butyl-6-isopropyl-5,8,9-trimethyl-1,4,7,10,14,17-hexaoxoicosahydropyrrolo[1,2-d][1,4,7,10,13,16]oxapentaazacyclononadecin-16-yl)-2-methylpropanoic acid	15.2024	13.0426	12.0471	14.5432	13.6201	14.474	14.9219	14.3502	16.3442	17.0105	16.2745	16.9876	16.0167	15.4023
X56008	-1.14144	-0.329086	0.628206	-0.114237	-1.85373	-1.35669	-0.880775	1.04674	0.404899	0.32288	1.2063	1.13719	1.00523	-0.0754969	538.349	40.28	C31H49NO5	True	1.33923	0.00165236	0.0724754	1.33923	Ambruticin VS-1	20.8817	21.6361	22.525	21.8356	20.2203	20.6818	21.1238	22.9136	22.3176	22.2415	23.0618	22.9976	22.8751	21.8715
X63170	0.0769875	-0.684877	0.145486	-0.720196	-2	-0.9135	-0.796323	1.11372	0.326161	-0.215849	0.803311	0.719707	1.12332	1.27453	597.313	34.991	C27H42N8O6	True	1.07896	0.00165291	0.0724754	1.07896	L-Lysine, N2-(N2-(N-L-tyrosyl-L-histidyl)-L-lysyl)- 4	15.7498	15.1906	15.8001	15.1647	14.04	15.0228	15.1088	16.5108	15.9327	15.5349	16.2829	16.2216	16.5178	16.6288
X37223	-1.24574	-1.52484	-1.06417	0.0399406	0.401675	-1.24122	-0.281412	0.748859	1.23171	1.39156	-0.28724	0.0776754	1.40954	0.343668	392.278	38.809	C22H35N5	True	2.88704	0.001653	0.0724754	2.88704	N~2~-(2-Phenylethyl)-6-undecyl-1,3,5-triazine-2,4-diamine	13.9587	13.385	14.332	16.6015	17.3451	13.968	15.941	18.0588	19.0513	19.3799	15.929	16.6791	19.4168	17.2259
X52367	0.152751	-0.0366197	1.34639	0.642782	0.167699	2	0.763769	-1.18576	-0.747651	-1.10737	-0.392364	0.105628	-0.428805	-1.4205	509.766	20.186	C48H71N15O10	False	1.02333	0.00165393	0.0724754	-1.02333	w/o MS2:[Gln1]-moroidin-[QLLVWRAH]	15.0821	14.9511	15.9079	15.4211	15.0924	16.457	15.5048	14.156	14.4591	14.2103	14.705	15.0495	14.6797	13.9936
X15707	0.593812	-0.823372	-1.52705	-0.856043	0.227652	-1.21105	-1.42679	-0.187305	0.539666	1.08366	0.630335	0.386462	1.30418	1.26583	233.062	3.231	C13H12O2S	False	1.4433	0.00165625	0.0725058	1.4433	(2Z)-3-{5-[(4Z)-5-(methylsulfanyl)pent-4-en-2-yn-1-yl]furan-2-yl}prop-2-enal	16.8257	15.4004	14.6927	15.3676	16.4574	15.0105	14.7935	16.0401	16.7712	17.3184	16.8624	16.6172	17.5401	17.5016
X65075	0.64476	-0.327548	-0.676544	-1.52979	-0.29489	-0.741319	-2	-0.321679	0.607739	0.662864	0.894669	0.892226	0.842578	1.34837	614.798	20.785	C18H18Br4O4	False	2.47999	0.00166032	0.0726126	2.47999	(Z,Z)-5,5'-(1,2-dibromo-1,2-ethanediylidene)bis<4-bromo-3-butyl-2(5H)-furanone>	12.2301	10.5171	9.90226	8.39902	10.5747	9.78814	7.56807	10.5275	12.1649	12.262	12.6704	12.6661	12.5786	13.4698
X21423	-0.0172859	0.857137	-0.0633998	0.900805	1.01287	1.47677	0.764664	0.588176	-0.970275	-0.0812964	-1.31657	-0.212472	-1.83453	-1.10459	276.179	22.212	C12H23N5O	False	2.35258	0.00166294	0.072656	-2.35258	1,3,5-Triazine-2,4-diamine, N,N,N',N'-tetraethyl-6-methoxy-	14.4898	15.9498	14.4128	16.0227	16.2098	16.9844	15.7954	15.5007	12.8987	14.383	12.3205	14.1639	11.4556	12.6744
X34109	-0.831806	-0.86562	-0.52277	-0.631047	-1.488	-0.905607	0.291025	0.865315	1.05513	1.13561	1.30342	1.21369	0.481816	-1.10115	368.192	20.666	C16H33NO4S2	False	1.96211	0.0016682	0.0727491	1.96211	S-{10-[(tert-Butoxycarbonyl)amino]decyl} methanesulfonothioate	18.9057	18.8589	19.3342	19.1841	17.9961	18.8034	20.4623	21.2584	21.5216	21.6331	21.8658	21.7414	20.7268	18.5324
X7189	0.976985	0.423676	0.628943	0.859181	0.525284	0.136704	1.36265	-0.657009	0.309097	-0.853683	-0.906618	-0.0256298	-0.241049	-2	154.985	6.426	CHClN6	False	2.86247	0.00166868	0.0727491	-2.86247	2H-Tetrazole-5-diazonium chloride	15.7128	14.5846	15.0032	15.4726	14.7918	13.9995	16.4992	12.3811	14.351	11.98	11.8721	13.6685	13.2292	8.54457
X28500	0.075154	-0.884265	-1.05657	-0.521385	-0.852228	-1.32131	-0.558583	-0.582937	-0.0305863	1.42574	1.1852	1.26258	1.61498	0.244214	325.684	22.814	C20H36O3	False	1.12217	0.00167316	0.0727491	1.12217	w/o MS2:(3S)-5-[(1R,2R,8aS)-2-hydroxy-2,5,5,8a-tetramethyl-3,4,4a,6,7,8-hexahydro-1H-naphthalen-1-yl]-3-methylpentanoic acid	15.5291	14.793	14.6608	15.0714	14.8176	14.4577	15.0429	15.0242	15.448	16.5653	16.3807	16.4401	16.7105	15.6588
X19381	0.657099	0.671463	0.423272	-0.0930806	1.84307	0.00585865	1.60836	0.265918	-0.52965	-0.58196	-0.528856	-1.65578	-0.870413	-1.21529	260.221	49.126	C14H29NO3	False	1.1286	0.00167411	0.0727491	-1.1286	(+)-clavaminol H	15.8737	15.8848	15.6931	15.2945	16.7894	15.3708	16.6081	15.5716	14.9574	14.917	14.958	14.0879	14.6943	14.428
X53970	-0.0108725	-0.0691212	-1.10831	-0.503102	-0.887022	-1.76239	-0.74949	-0.244647	0.521929	1.58431	1.67123	1.15877	0.22686	0.171858	522.768	19.841	C49H69N15O11	False	1.19006	0.00167472	0.0727491	1.19006	w/o MS2:Amaranthipeptide B	15.1791	15.1315	14.2811	14.7764	14.4622	13.7459	14.5747	14.9878	15.6151	16.4844	16.5555	16.1362	15.3737	15.3286
X74911	-0.854052	-0.672431	-1.07926	-0.738816	-0.329674	0.672091	-1.94888	-0.0874994	0.393214	1.36136	0.99234	0.874096	0.0086804	1.40884	723.383	21.074	C38H56N2O10	False	1.98037	0.00167546	0.0727491	1.98037	(+)-leucascandrolide	12.6894	12.9437	12.3741	12.8508	13.4235	14.826	11.1567	13.7626	14.4356	15.7909	15.2743	15.1088	13.8972	15.8574
X6865	2	1.05547	0.43914	-0.207551	1.61288	0.652137	-0.400328	-0.441875	-1.03466	-0.752477	-0.861094	-0.963547	-0.967914	-0.131914	151.075	44.95	C5H13NO2P	False	1.05404	0.0016765	0.0727491	-1.05404	Ethoxy[2-(methylamino)ethyl]oxophosphanium	16.5732	15.8958	15.4546	14.9917	16.2948	15.6071	14.8537	14.8239	14.3996	14.6016	14.5238	14.4505	14.4474	15.0458
X35919	0.46822	0.273457	-1.78523	-1.63313	-0.237035	-1.45778	-0.579489	0.0689886	0.384704	1.10802	0.765478	0.738325	1.09386	0.791611	383.115	2.674	C17H20N4O3S	False	1.96936	0.0016801	0.0727792	1.96936	2-{[8,8-dimethyl-4-oxo-3-(prop-2-en-1-yl)-3,6,8,9-tetrahydro-4H-pyrano[3',4':5,6]pyrido[2,3-d]pyrimidin-2-yl]sulfanyl}acetamide	14.0327	13.7615	10.8954	11.1072	13.0508	11.3513	12.574	13.4769	13.9164	14.9234	14.4465	14.4087	14.9037	14.4829
X14699	-1.77038	-1.39485	-0.477958	-0.0190868	-1.5219	0.14244	-0.0464611	1.56663	0.897038	1.05208	0.667908	0.713859	0.0147545	0.175918	225.145	46.534	C8H17NO5	True	1.19252	0.00168046	0.0727792	1.19252	N-Ethylglycocyamine|C02852	18.1104	18.4184	19.1705	19.5469	18.3142	19.6794	19.5245	20.8477	20.2984	20.4256	20.1105	20.1482	19.5747	19.7069
X34007	-1.21094	-1.40901	-0.51549	0.442219	-1.95143	0.063765	-0.579392	0.930009	0.802841	0.857236	-0.216862	1.12022	0.790076	0.876759	367.247	38.865	C20H32N4O	True	1.03915	0.00168526	0.0729163	1.03915	(+)-(2S)-2-phenyl-1,5,9,14-tetraazabicyclo[12.3.1]octadecan-4-one	17.5343	17.3947	18.0244	18.6994	17.0124	18.4327	17.9794	19.0433	18.9536	18.992	18.2349	19.1773	18.9446	19.0057
X46452	-0.0588001	-0.846087	-0.926175	-1.33239	-1.16972	-0.744937	0.102436	-0.351682	1.12721	1.62842	1.50762	1.15916	-0.200591	0.105529	463.257	19.593	C26H36N2O4	False	1.69949	0.0016888	0.0729986	1.69949	2-(3,4-dimethoxyphenyl)-5-{[2-(3-hydroxy-4-methoxyphenyl)ethyl](methyl)amino}-2-(propan-2-yl)pentanenitrile	15.6343	14.6932	14.5974	14.1118	14.3063	14.8141	15.8271	15.2842	17.0522	17.6513	17.5069	17.0904	15.4648	15.8308
X39256	0.245509	-2	-0.902045	-0.843777	0.505345	-1.2219	-0.835313	0.147171	1.01546	1.11693	0.599305	0.102168	1.10945	0.985513	408.331	43.915	C22H41N5O2	False	1.2198	0.00169132	0.0730366	1.2198	N-[14-(4-Butylphenoxy)-3,6,9,12-tetraazatetradecan-1-yl]acetamide	16.0386	14.1299	15.0734	15.1224	16.2571	14.8044	15.1295	15.9559	16.6862	16.7715	16.3362	15.918	16.7652	16.661
X31761	-0.657881	-0.882763	-0.98396	-1.11888	-1.17676	-0.269383	0.0284556	-0.160525	1.15373	1.72663	1.48219	1.22062	-0.279306	-0.0821781	349.202	20.249	C18H31ClN2O	False	1.2621	0.00169507	0.0731278	1.2621	1-Piperidinepropionamide, N-1-adamantyl-, monohydrochloride	15.2986	15.1023	15.014	14.8963	14.8457	15.6377	15.8976	15.7327	16.8798	17.3798	17.1665	16.9382	15.629	15.8011
X50624	-0.797718	-1.27827	-1.52287	0.260071	-1.43007	-0.423613	0.3045	1.49446	0.811693	1.31789	0.713888	0.863068	-0.372214	0.059187	496.2	18.922	C31H27N3O2	False	4.336	0.00169951	0.0731327	4.336	N-(4-Butoxyphenyl)-2,3-diphenylquinoxaline-6-carboxamide	8.41463	6.92263	6.1632	11.6988	6.45134	9.57614	11.8368	15.5313	13.4115	14.9831	13.1078	13.571	9.73572	11.0751
X53981	-0.0408259	-0.731336	-0.965612	-0.206371	-0.731751	-0.667399	-1.57189	-1.11529	0.48169	1.64066	1.04645	1.11981	0.909749	0.832128	522.804	21.685	C12H17Br3Cl2O2	False	2.59755	0.00169984	0.0731327	2.59755	(2R,3R,5E,7S)-2,8,8-tribromo-1,7-dichloro-2,6-dimethyloct-5-en-3-yl acetate	14.5067	13.2295	12.7962	14.2005	13.2287	13.3478	11.6748	12.5193	15.4732	17.6169	16.5178	16.6535	16.265	16.1214
X50942	1.43354	1.19386	-0.558734	0.260802	1.0247	0.0369472	1.48809	-1.05988	-1.54197	-0.0722762	-0.30666	-0.62144	0.0935925	-1.37057	498.318	37.095	C28H45NO5	False	6.55274	0.00170101	0.0731327	-6.55274	Holantosine B	16.6828	15.5562	7.31818	11.1704	14.7611	10.1182	16.9392	4.96255	2.69653	9.60477	8.50305	7.02344	10.3844	3.50216
X72365	-1.14684	-0.328928	-0.997613	0.345256	-1.01614	-1.53321	-0.271452	0.251578	0.149144	1.78391	0.378388	1.18085	1.4609	-0.255833	689.373	25.814	C31H48N10O8	False	1.94272	0.00170196	0.0731327	1.94272	AWSVAR	14.5527	15.6764	14.7577	16.6027	14.7322	14.0218	15.7554	16.474	16.3333	18.5793	16.6482	17.7508	18.1355	15.7769
X28851	-0.395102	-0.909106	-0.674854	-1.59672	0.25415	-1.8612	0.194665	0.695136	1.54011	1.10669	1.01611	0.420205	0.364663	-0.154748	328.196	21.003	C12H27N5O4	False	1.58581	0.0017043	0.0731327	1.58581	Nitric acid--N-[(2-decylhydrazinyl)methylidene]urea (1/1)	15.5976	15.0257	15.2863	14.2605	16.32	13.9663	16.2538	16.8107	17.7509	17.2686	17.1678	16.5048	16.443	15.865
X30158	-1.42531	-1.22251	-0.488783	0.858945	-0.867281	-1.16736	-0.848395	1.0463	1.48843	1.10481	-0.246244	0.489152	0.725553	0.552697	337.178	48.526	C20H22N3O2	True	1.03141	0.00170509	0.0731327	1.03141	N-{2,7-dimethyl-11-oxo-2,7-diazatricyclo[6.3.1.0^{4,12}]dodeca-1(12),3,8-trien-10-ylidene}-2-(4-hydroxyphenyl)ethan-1-aminium	16.4647	16.6065	17.1198	18.0625	16.855	16.6451	16.8682	18.1936	18.5028	18.2345	17.2894	17.8038	17.9692	17.8483
X11174	-1.09637	-2	-0.180316	-0.0105767	-1.43249	-0.194953	0.25866	0.945458	1.07668	0.625646	0.519041	1.02083	0.689967	0.0951563	194.117	44.347	C6H16ClN5	True	1.69144	0.001709	0.0731327	1.69144	Biguanide, 1-isobutyl-, monohydrochloride	19.5349	18.082	20.6254	20.8275	19.1347	20.608	21.148	21.9656	22.1218	21.5849	21.458	22.0554	21.6615	20.9534
X16476	0.272129	-1.88052	-0.76266	-0.852848	-0.352183	-1.41178	-0.288109	0.364351	1.21534	1.47045	1.33296	0.0952528	0.351946	0.445667	239.106	44.427	C11H15ClN4	True	0.88546	0.00170917	0.0731327	0.88546	1-(Piperidin-4-yl)-1H-benzotriazole--hydrogen chloride (1/1)	16.9345	15.67	16.3266	16.2736	16.5677	15.9453	16.6054	16.9886	17.4885	17.6384	17.5576	16.8306	16.9813	17.0364
X42918	-0.080843	-0.843868	0.132573	-1.70075	-1.41797	-0.691235	-0.338364	-0.337494	1.27725	0.712976	1.70676	1.23458	0.266578	0.0798079	436.252	19.593	C24H34O4S	False	2.03274	0.00171106	0.0731327	2.03274	17beta-Hydroxy-4-mercaptoandrost-4-en-3-one 4-acetate 17-propionate|C15180	16.5648	15.466	16.8721	14.232	14.6392	15.6858	16.1939	16.1952	18.5205	17.7079	19.1391	18.4591	17.0651	16.7961
X36821	-0.0388437	-1.65384	-0.897317	-1.30515	0.386548	-0.95466	-1.04138	0.123378	1.10052	1.00947	0.948585	0.109458	1.14561	1.06762	389.289	41.745	C20H38N4O2	False	0.729913	0.00171254	0.0731327	0.729913	1-Pyrrolidinecarboxamide, N,N'-ethylenebis(N-butyl-	16.0162	15.2667	15.6178	15.4285	16.2136	15.5912	15.5509	16.0915	16.545	16.5027	16.4745	16.085	16.5659	16.5297
X9466	-1.49147	0.412516	-0.0545222	-1.52165	-0.0838008	-1.33061	-0.808861	1.59881	0.123026	0.676411	1.44583	0.164532	0.028363	0.84143	179.039	5.456	C7H6N4S	True	5.94857	0.00171324	0.0731327	5.94857	1-Phenyl-5-mercaptotetrazole|C15415	5.94775	14.0736	12.0803	5.81893	11.9554	6.63427	8.86097	19.1364	12.8381	15.1998	18.4835	13.0152	12.4341	15.9041
X42556	0.768516	-0.871812	-1.86084	-0.835118	-1.36205	-0.565407	-0.17001	0.104932	0.871563	0.98841	1.56062	0.014168	0.979619	0.377411	433.276	34.373	C17H40N2O10	False	3.18126	0.00172297	0.0734775	3.18126	Formic acid--N,N-diethylethanamine (5/2)	13.8713	10.1415	7.89255	10.2249	9.02675	10.8382	11.7373	12.3624	14.1056	14.3713	15.6724	12.1561	14.3513	12.982
X35869	-0.202594	1.74707	0.204074	0.841685	1.59185	0.0485177	0.689611	0.468444	-1.15526	-0.801353	-1.6106	-0.993227	-0.302349	-0.525876	382.315	47.735	C26H39NO	False	2.33473	0.00172795	0.0736194	-2.33473	Buxpsiin	13.6616	16.8996	14.337	15.3959	16.6418	14.0786	15.1434	14.7761	12.0794	12.6672	11.3232	12.3485	13.4959	13.1247
X24276	-1.31519	-0.260306	0.45893	-1.61899	-0.92695	-1.52071	0.303798	0.958314	0.986687	0.141004	1.21234	0.896489	0.928408	-0.243821	296.177	20.134	C17H26ClNO	False	4.81641	0.00173091	0.0736752	4.81641	Pyridine, 1,2,3,6-tetrahydro-1-(2-(thymyloxy)ethyl)-, hydrochloride	7.45595	11.1004	13.5852	6.40638	8.79725	6.74593	13.0492	15.3105	15.4085	12.4868	16.1881	15.0969	15.2071	11.1573
X32733	0.181675	-0.969094	-0.297139	-0.959284	-1.7398	-0.617597	-0.545696	-0.71981	0.940519	1.46695	1.38974	1.27089	0.171153	0.427488	357.218	20.905	C21H25NO3	False	1.87893	0.00174147	0.0740019	1.87893	Nalmefene|C08027	18.0648	16.535	17.4283	16.5481	15.5105	17.0023	17.0979	16.8664	19.0736	19.7734	19.6708	19.5128	18.0508	18.3916
X31976	-0.260486	-0.788954	0.486824	-1.70211	-0.689519	-0.121402	-1.86147	0.458914	1.0493	0.350972	1.27347	0.857178	-0.226467	1.17375	351.212	19.422	C17H35O3PS	False	1.99926	0.00174191	0.0740019	1.99926	Ethyl 2-(heptylsulfanyl)ethyl cyclohexylphosphonate	16.177	15.428	17.2362	14.1338	15.5689	16.3741	13.9079	17.1966	18.0334	17.0436	18.3511	17.7611	16.2252	18.2098
X28594	0.142831	1.5487	0.890921	0.412174	0.181738	1.47055	0.469674	-0.112153	-1.32014	-1.2346	-1.45803	0.457764	-1.24238	-0.207051	326.231	48.486	C17H29N5	True	1.09573	0.00174644	0.0740995	-1.09573	1H-Purin-6-amine, N-dodecyl-	16.2279	17.2816	16.7886	16.4298	16.2571	17.2231	16.4729	16.0368	15.1314	15.1955	15.028	16.464	15.1896	15.9657
X14317	1.05843	0.87171	-0.00295164	0.585875	1.29219	1.40765	-0.191831	-0.16354	-1.04838	-0.0960816	-1.589	-0.549386	-1.75865	0.183977	222.075	37.25	C10H9N5	False	1.37009	0.00174753	0.0740995	-1.37009	3-methyl-3H-imidazo[4,5-f]quinoxalin-2-amine	16.1202	15.9419	15.1066	15.6689	16.3435	16.4537	14.9262	14.9532	14.1081	15.0176	13.5918	14.5847	13.4298	15.2851
X70348	1.68865	1.4094	0.338113	0.811797	1.40424	-0.660678	-0.0955465	-1.15495	-1.02444	-1.07705	-1.09822	-0.460065	0.0174546	-0.0987002	666.396	45.434	C32H60NO11P	False	2.97366	0.00174971	0.0741215	-2.97366	1-Palmitoyl-2-(5-hydroxy-8-oxo-6-octenedioyl)-sn-glycero-3-phosphocholine|C13898	17.9373	17.3437	15.0663	16.0733	17.3327	12.9431	14.1445	11.8924	12.1699	12.058	12.013	13.3696	14.3847	14.1378
X23643	-1.65129	-1.65284	-0.600042	-0.224378	-1.27968	0.60848	-0.344369	1.28741	1.08989	0.411704	0.965418	0.7508	-0.0613145	0.700202	292.174	27.785	C12H23N5O2	True	1.04183	0.00175407	0.0742357	1.04183	2,2'-{[2-(Diethylamino)pyrimidine-4,6-diyl]diazanediyl}di(ethan-1-ol)	18.5132	18.5121	19.2584	19.5247	18.7766	20.115	19.4396	20.5963	20.4563	19.9756	20.3681	20.2159	19.6403	20.1801
X1313	0.029239	0.828891	0.594649	1.16586	1.24769	-0.214957	1.27113	0.615617	0.0126766	-0.961179	-1.65446	-1.0779	-0.452335	-1.40492	82.0139	6.672	C4H5NS	True	2.18165	0.00175773	0.0743198	-2.18165	Allyl isothiocyanate|C19317	13.7907	15.0311	14.6678	15.5538	15.6808	13.4119	15.7171	14.7003	13.765	12.2544	11.179	12.0733	13.0437	11.5661
X27967	-0.375592	1.39779	1.07918	0.946818	1.05139	0.332867	0.516368	0.493942	-1.08777	-1.51192	-1.79101	-0.561832	-0.197726	-0.292524	321.262	47.833	C16H34N4O	False	1.81956	0.00176113	0.0743692	-1.81956	2,3S-dihydro-Aplysillamide A	14.9887	17.2709	16.8608	16.6905	16.8251	15.9004	16.1366	16.1077	14.0723	13.5264	13.1673	14.7491	15.2176	15.0956
X58664	-1.07255	-0.280659	0.972176	-1.33224	-0.59811	-1.20444	-1.35602	0.580143	0.825801	-0.50436	1.13505	0.805479	0.756256	1.27347	559.781	19.114	C51H75N17O12	False	5.27153	0.00176223	0.0743692	5.27153	w/o MS2:[Asn0-Gln1]-moroidin	7.17055	10.1696	14.9142	6.18709	8.96733	6.67105	6.09703	13.4295	14.3599	9.32237	15.5311	14.2829	14.0965	16.0553
X53950	0.163762	-0.400912	-0.294772	-0.494481	-0.337262	-1.41743	-2	-0.512085	0.412646	0.768651	1.33311	0.734486	0.985234	1.20356	522.353	41.898	C26H49N3O6	False	2.10686	0.00176493	0.0743826	2.10686	Sch 419559	13.8245	12.9791	13.138	12.839	13.0744	11.4573	10.3688	12.8127	14.1971	14.73	15.5751	14.6789	15.0543	15.3811
X81474	1.45933	0.462312	0.0350111	0.170958	1.1864	1.36419	0.200537	-1.02985	-1.12996	-1.94866	-0.461356	0.0550361	-0.853015	0.489065	878.697	25.858	C50H98NO7P	False	3.97928	0.0017666	0.0743826	-3.97928	trimethyl[2-({2-[(1Z,11Z)-octadeca-1,11-dien-1-yloxy]-3-(tetracosanoyloxy)propyl phosphonato}oxy)ethyl]azanium	16.577	13.7308	12.5109	12.899	15.7979	16.3054	12.9835	9.47106	9.18527	6.84811	11.094	12.5681	9.97588	13.8071
X13256	1.10023	1.25497	0.496399	0.429962	0.705544	1.08666	-0.202533	-1.46176	-1.23095	-1.81888	-0.273202	0.0474975	-0.780212	0.646277	213.065	30.911	C7H9ClN6	True	5.18744	0.00176756	0.0743826	-5.18744	1-(3-Hydrazinylphenyl)-1H-tetrazole--hydrogen chloride (1/1)	19.2946	19.8713	17.044	16.7964	17.8235	19.244	14.4389	9.74553	10.6058	8.41447	14.1755	15.3708	12.2858	17.6026
X61518	-1.30647	-0.466147	-1.6834	-0.411458	-1.1455	0.433988	-0.289406	1.48374	0.472004	1.25809	0.978001	0.877372	-0.706618	0.50579	584.263	20.198	C27H45O10S	False	5.79801	0.00177191	0.0744273	5.79801	(1R,3R,3aS,3bS,4R,5R,5aR,6R,7S,9aS,9bR,11aR)-3,3b,4,6,7-pentahydroxy-1-[(2R,3E,5R)-5-hydroxy-6-methylhept-3-en-2-yl]-9a,11a-dimethyl-hexadecahydro-1H-cyclopenta[a]phenanthren-5-yl sulfate	6.83645	10.3392	5.26529	10.5671	7.50743	14.0912	11.0759	18.467	14.2497	17.5264	16.3589	15.9394	9.33682	14.3905
X11855	0.283648	1.49926	0.580124	0.317925	-0.384801	0.449073	2	-0.0169584	-1.20025	-0.955509	-0.714562	0.0336788	-0.678093	-1.3745	200.139	18.585	C9H19N3O3	False	2.47981	0.00177196	0.0744273	-2.47981	beta-Alanyl-L-lysine|C05341	13.3913	15.5418	13.9158	13.4519	12.2088	13.6839	16.7124	12.8595	10.7662	11.1991	11.6254	12.9491	11.6899	10.4579
X75811	-0.466278	-0.87423	-0.380377	-1.75058	-0.306814	-0.29024	-1.26763	-0.313877	0.151475	0.572237	1.24337	1.23775	0.718913	1.72629	737.344	21.957	C28H52N10O9S2	True	0.821024	0.00177713	0.0745342	0.821024	L-Cysteinylglycyl-L-seryl-L-leucyl-L-valyl-N~5~-(diaminomethylidene)-L-ornithyl-L-cysteine	14.4541	14.2344	14.5004	13.7625	14.54	14.5489	14.0226	14.5362	14.7868	15.0134	15.3748	15.3717	15.0924	15.6348
X66694	-0.416045	0.624754	-1.37607	-1.18542	-0.762797	-0.343123	-1.43094	0.384939	-0.64522	0.834478	1.28084	1.1973	0.489762	1.34753	629.397	20.793	C42H54O3	False	3.03142	0.00177836	0.0745342	3.03142	alloxanthin 3-acetate	10.333	12.5914	8.24982	8.6635	9.58055	10.4912	8.13076	12.071	9.83568	13.0465	14.015	13.8337	12.2985	14.1597
X7188	0.957296	0.433175	0.593198	0.944309	0.485452	0.125568	1.35145	-0.624684	0.324481	-0.797161	-1.06755	0.00768348	-0.233341	-2	154.985	6.385	CHClN6	False	2.98295	0.00177952	0.0745342	-2.98295	2H-Tetrazole-5-diazonium chloride	15.7325	14.6136	14.9552	15.7048	14.7252	13.9569	16.574	12.3552	14.3816	11.987	11.4098	13.7052	13.1907	8.35201
X42534	0.471382	-0.247932	0.770641	2	0.42126	0.15661	0.900477	-0.41656	-0.619392	-0.618426	-1.27695	-1.11347	-0.565777	-0.462866	433.203	24.1	C23H30N4OS	True	1.17741	0.001782	0.074568	-1.17741	4H-1,3-Thiazin-2-amine, 5,6-dihydro-N-(3-(3-(4-phenyl-1-piperazinyl)propoxy)phenyl)-	15.1872	14.603	15.4303	16.917	15.1465	14.9315	15.5358	14.466	14.3012	14.302	13.7671	13.8999	14.3448	14.4284
X9919	-0.984573	-2	-0.547833	-0.260036	-0.923825	-0.0653634	0.313946	0.936453	1.20488	0.768691	0.674169	0.888916	0.507526	-0.0060062	183.08	44.801	C5H11NO3S	True	1.56396	0.00179355	0.0749808	1.56396	L-Methionine S-oxide|C02989	20.7292	19.0541	21.2098	21.5265	20.7961	21.7407	22.1581	22.8431	23.1384	22.6585	22.5544	22.7907	22.3711	21.806
X43752	0.0107685	0.136991	-0.122237	-1.57152	-0.68973	-1.5924	-1.05379	-0.271133	1.3457	1.10151	1.57767	-0.0895346	0.470414	0.74729	442.254	32.523	C21H39O8	False	3.24631	0.00179963	0.0751646	3.24631	2,2,3,3-Tetraethoxy-4-(nonyloxy)-4-oxobutanoate	10.732	11.0258	10.4224	7.0494	9.10167	7.00082	8.25436	10.0759	13.8389	13.2706	14.3788	10.4986	11.8018	12.4462
X42270	-0.140547	2	1.05982	0.804894	-0.438713	0.438872	1.07354	0.342925	-0.92051	-1.46787	-0.715087	-0.556959	-0.60997	-0.971492	431.093	41.049	C16H28N2O2S4	True	2.48533	0.00181138	0.0755467	-2.48533	Disulfide, bis((4-(2-hydroxyethyl)-1-piperidinyl)thioxomethyl)	12.4888	16.4691	14.6202	14.1675	11.9594	13.5176	14.6445	13.3472	11.1039	10.132	11.4686	11.7494	11.6553	11.0134
X43478	-0.209575	-0.546246	-0.463535	-0.901439	-0.691232	-0.0950062	-2	-0.296793	0.708744	1.43588	1.4359	0.845235	-0.208134	1.09899	440.236	20.198	C17H26N8O5	False	1.3258	0.00181217	0.0755467	1.3258	Blasticidin S|C02010	15.1511	14.8399	14.9163	14.5115	14.7059	15.257	13.3918	15.0705	16	16.6722	16.6722	16.1262	15.1524	16.3607
X16715	0.1416	1.35581	0.368799	1.20875	0.962838	-0.0682661	0.911568	0.143709	-0.957817	-0.619483	-2	-0.67185	0.391262	-0.935003	241.085	42.885	C9H21OPS2	True	3.15021	0.00181388	0.0755472	-3.15021	S-Ethyl S-(2-methylbutan-2-yl) ethylphosphonodithioate	15.3974	18.1401	15.9106	17.8079	17.2524	14.9233	17.1366	15.4021	12.9139	13.6782	10.0359	13.5599	15.9613	12.9655
X12002	0.354859	-0.18831	-0.246592	1.39645	1.34065	1.46393	1.0306	-0.938241	-0.436386	-1.22654	-1.29766	-1.06761	0.359757	-0.544901	201.148	39.125	C12H20N	True	1.00899	0.00181606	0.0755674	-1.00899	Pyridinium, 1-hexyl-4-methyl-	18.1101	17.7378	17.6978	18.8242	18.7859	18.8704	18.5734	17.2237	17.5677	17.0261	16.9773	17.135	18.1135	17.4933
X44747	-0.158102	0.30783	-0.358602	-1.13549	-1.63107	-0.158434	-1.779	0.0503053	0.412325	1.1123	1.31231	1.29985	-0.150442	0.876221	450.262	19.744	C26H37NO4	False	2.15447	0.00181984	0.075654	2.15447	PUBCHEM_46193340	16.8809	17.5961	16.5732	15.3807	14.6201	16.8804	14.393	17.2008	17.7564	18.8308	19.1378	19.1187	16.8927	18.4685
X20609	-0.394178	0.983469	1.25891	1.21311	1.12882	-0.155569	0.855711	0.790518	-1.2163	-0.638972	-1.44759	-0.763143	-0.422709	-1.19209	270.148	42.693	C12H20ClN5	True	2.67182	0.00182533	0.0758117	-2.67182	Imidodicarbonimidic diamide, N-(2,3,5,6-tetramethylphenyl)-, monohydrochloride	13.2929	15.9273	16.454	16.3664	16.2052	13.7492	15.683	15.5583	11.7208	12.8248	11.2785	12.5873	13.2383	11.7671
X65250	0.46298	-0.838269	-0.37077	-0.637656	-1.20982	-1.34623	-0.973849	-0.930399	1.14225	1.1114	1.2945	1.11578	0.972093	0.208002	616.324	21.132	C35H47NO7	False	2.10748	0.00183154	0.0759869	2.10748	(1R,3E,7S,9S,10E,12E,14R,15R)-9-hydroxy-7-[(2S,3R,4E,6E,8E)-3-methoxy-4,8-dimethyl-9-(2-methyl-1,3-oxazol-4-yl)nona-4,6,8-trien-2-yl]-10,14-dimethyl-6,16-dioxabicyclo[13.3.1]nonadeca-3,10,12-triene-5,17-dione	17.0001	15.0467	15.7485	15.3478	14.4889	14.2841	14.8432	14.9084	18.0198	17.9735	18.2483	17.9801	17.7644	16.6173
X22245	0.98086	0.560049	-0.461236	1.95497	1.45579	0.1542	0.92386	-0.772926	-0.504078	-0.592194	-0.913849	-0.936393	-0.738319	-1.11073	281.246	45.559	C18H34O3	True	0.689017	0.00183296	0.0759869	-0.689017	2-Oxooctadecanoic acid|C00869	18.1663	17.9841	17.5418	18.5882	18.372	17.8083	18.1417	17.4068	17.5233	17.4851	17.3458	17.336	17.4218	17.2605
X16228	-0.294587	0.863656	0.88666	1.25659	1.06019	0.540841	0.5818	1.05927	-0.930787	-0.88187	-0.746809	-0.907434	-1.87857	-0.608961	237.09	46.495	C11H13ClN4	True	2.47117	0.00183613	0.0760477	-2.47117	Pyridinium, 1-((4-amino-2-methyl-5-pyrimidinyl)methyl)-, chloride	12.694	14.7405	14.7811	15.4348	15.0877	14.1701	14.2425	15.0861	11.57	11.6564	11.895	11.6112	9.89536	12.1386
X31253	-1.46659	-0.0798706	-0.861363	-1.00769	0.413335	-1.71646	-0.306128	1.10263	-0.236707	1.16575	1.5964	0.578668	0.295435	0.522596	345.201	21.507	C16H28N2O6	False	1.28312	0.00184892	0.0765062	1.28312	1-(tert-Butoxycarbonyl)-4-[(tert-butoxycarbonyl)amino]piperidine-4-carboxylic acid	14.5311	15.7705	15.072	14.9412	16.2113	14.3077	15.5682	16.8273	15.6303	16.8837	17.2687	16.359	16.1059	16.3089
X58950	0.298675	-0.809559	0.113926	-0.837796	-0.618887	-1.2388	-1.79434	-0.886148	0.784678	0.881393	1.09915	0.984048	0.986029	1.03763	562.269	18.796	C21H41N5O11	False	2.62081	0.00185453	0.0766672	2.62081	(2R)-4-amino-N-[(1R,2R,3R,4R,5R)-5-amino-4-{[(2R,3S,4S,6R)-3-amino-6-(aminomethyl)-4-hydroxyoxan-2-yl]oxy}-3-{[(2S,3R,4R,5R)-3,4-dihydroxy-5-(hydroxymethyl)oxolan-2-yl]oxy}-2-hydroxycyclohexyl]-2-hydroxybutanimidic acid	14.2935	12.2133	13.9467	12.1603	12.5712	11.4075	10.3648	12.0695	15.2058	15.3873	15.796	15.58	15.5837	15.6806
X33395	0.0284814	1.66322	0.710261	1.07128	0.0799569	1.07516	0.334707	-0.0956893	-1.04048	-0.576687	-2	-0.0635153	-0.871599	-0.0533509	362.216	46.505	C16H29N5O3	True	1.56207	0.00185827	0.0767503	-1.56207	3-((3R,5R,6R)-3-amino-6-(E,E)-hexa-2,4-dienoylamino-5-hydroxyheptanoyl)aminopropanamidine(Sperabillin D)	14.7763	16.5771	15.5274	15.9251	14.833	15.9293	15.1137	14.6395	13.5988	14.1097	12.2535	14.675	13.7848	14.6862
[truncated: 43,486 more rows]

## Sheet: neg
	Normalized Log2 Intensity, Row Z Score																		X403_HCM-WT				Normalized Log2 Intensity
[truncated: 1,636 more rows]
