# Supplementary material for: Multi-Omics Profiling of Hypertrophic Cardiomyopathy Reveals Altered Mechanisms in Mitochondrial Dynamics and Excitation–Contraction Coupling
Source: Int J Mol Sci. 2023 Mar 1;24(5):4724. doi: 10.3390/ijms24054724 (PMC10002553; doi:10.3390/ijms24054724)
Supplement: Supplementary file 1 [file ijms-24-04724-s001.zip › Supp_Table_S7.xlsx]

## Sheet: 13C_Fructose-1,6-Phosphate
WT	R403Q +/-			Table Analyzed	13C_Fructose-1,6-Phosphate
3878.03	19967.6
640.154	33928.9			Column B	R403Q +/-
7459.84	8904.12			vs.	vs.
9770.27	27471.5			Column A	WT
	7915.61
				Unpaired t test with Welch's correction
				P value	0.047
				P value summary	*
				Significantly different (P < 0.05)?	Yes
				One- or two-tailed P value?	Two-tailed
				Welch-corrected t, df	t=2.595, df=5.173
				How big is the difference?
				Mean of column A	5437
				Mean of column B	19638
				Difference between means (B - A) ± SEM	14200 ± 5472
				95% confidence interval	274.5 to 28126
				R squared (eta squared)	0.5656
				F test to compare variances
				F, DFn, Dfd	8.047, 4, 3
				P value	0.1181
				P value summary	ns
				Significantly different (P < 0.05)?	No
				Data analyzed
				Sample size, column A	4
				Sample size, column B	5

## Sheet: 13C_Glyceraldehyde-3-Phosphate
WT	R403Q +/-			Table Analyzed	13C_Glyceraldehyde-3-Phosphate
2856.67	2703.19
961.691	2322.73			Column B	R403Q +/-
688.938	4843.65			vs.	vs.
3137.97	5081.18			Column A	WT
2953.21	2911.11
				Unpaired t test with Welch's correction
				P value	0.1015
				P value summary	ns
				Significantly different (P < 0.05)?	No
				One- or two-tailed P value?	Two-tailed
				Welch-corrected t, df	t=1.852, df=7.949
				How big is the difference?
				Mean of column A	2120
				Mean of column B	3572
				Difference between means (B - A) ± SEM	1453 ± 784.5
				95% confidence interval	-358.5 to 3264
				R squared (eta squared)	0.3013
				F test to compare variances
				F, DFn, Dfd	1.174, 4, 4
				P value	0.8803
				P value summary	ns
				Significantly different (P < 0.05)?	No
				Data analyzed
				Sample size, column A	5
				Sample size, column B	5

## Sheet: 13C_3-Phosphoglycerate
WT	R403Q +/-			Table Analyzed	13C_3-Phosphoglycerate
4826.02	6538.34
339.687	6370.82			Column B	R403Q +/-
219.205	6328.05			vs.	vs.
5514.36	9331.31			Column A	WT
4515.28	5372.31
				Unpaired t test with Welch's correction
				P value	0.0301
				P value summary	*
				Significantly different (P < 0.05)?	Yes
				One- or two-tailed P value?	Two-tailed
				Welch-corrected t, df	t=2.775, df=6.402
				How big is the difference?
				Mean of column A	3083
				Mean of column B	6788
				Difference between means (B - A) ± SEM	3705 ± 1335
				95% confidence interval	487.6 to 6923
				R squared (eta squared)	0.5461
				F test to compare variances
				F, DFn, Dfd	2.996, 4, 4
				P value	0.313
				P value summary	ns
				Significantly different (P < 0.05)?	No
				Data analyzed
				Sample size, column A	5
				Sample size, column B	5

## Sheet: 13C_Lactate
WT	R403Q +/-			Table Analyzed	13C_Lactate
4946.72	8143.51
2980.98	16761.4			Column B	MYH7
2998.41	15615.3			vs.	vs.
3971.25	9197.94			Column A	WT
7010.31	2567.38
				Unpaired t test with Welch's correction
				P value	0.0789
				P value summary	ns
				Significantly different (P < 0.05)?	No
				One- or two-tailed P value?	Two-tailed
				Welch-corrected t, df	t=2.242, df=4.661
				How big is the difference?
				Mean of column A	4382
				Mean of column B	10457
				Difference between means (B - A) ± SEM	6076 ± 2709
				95% confidence interval	-1044 to 13195
				R squared (eta squared)	0.519
				F test to compare variances
				F, DFn, Dfd	12.02, 4, 4
				P value	0.0336
				P value summary	*
				Significantly different (P < 0.05)?	Yes
				Data analyzed
				Sample size, column A	5
				Sample size, column B	5

## Sheet: 13C_Citrate
WT	R403Q +/-			Table Analyzed	13C_Citrate
2494.87	9165.84
469.051	9327.21			Column B	MYH7 403/+
1583.13	10216.9			vs.	vs.
4936.65	3352.33			Column A	WT
	1511.15
				Unpaired t test with Welch's correction
				P value	0.0753
				P value summary	ns
				Significantly different (P < 0.05)?	No
				One- or two-tailed P value?	Two-tailed
				Welch-corrected t, df	t=2.151, df=5.957
				How big is the difference?
				Mean of column A	2371
				Mean of column B	6715
				Difference between means (B - A) ± SEM	4344 ± 2019
				95% confidence interval	-605.7 to 9293
				R squared (eta squared)	0.4372
				F test to compare variances
				F, DFn, Dfd	4.394, 4, 3
				P value	0.254
				P value summary	ns
				Significantly different (P < 0.05)?	No
				Data analyzed
				Sample size, column A	4
				Sample size, column B	5

## Sheet: 13C_Isocitrate
WT	R403Q +/-			Table Analyzed	13C_Isocitrate
124.507	217.142
39.7014	133.649			Column B	MYH7
98.7967	100.266			vs.	vs.
	120.891			Column A	WT
				Unpaired t test with Welch's correction
				P value	0.1858
				P value summary	ns
				Significantly different (P < 0.05)?	No
				One- or two-tailed P value?	Two-tailed
				Welch-corrected t, df	t=1.541, df=4.840
				How big is the difference?
				Mean of column A	87.67
				Mean of column B	143
				Difference between means (B - A) ± SEM	55.32 ± 35.90
				95% confidence interval	-37.88 to 148.5
				R squared (eta squared)	0.3292
				F test to compare variances
				F, DFn, Dfd	1.393, 3, 2
				P value	0.8878
				P value summary	ns
				Significantly different (P < 0.05)?	No
				Data analyzed
				Sample size, column A	3
				Sample size, column B	4

## Sheet: 13C_Fumarate
WT	R403Q +/-			Table Analyzed	13C_Fumarate
1298.04	2311.66
1192.59	2375.91			Column B	MYH7_R403Q +/-
706.624	1752.59			vs.	vs.
1473.54	1995.22			Column A	WT
1315.71	861.242
				Unpaired t test with Welch's correction
				P value	0.0738
				P value summary	ns
				Significantly different (P < 0.05)?	No
				One- or two-tailed P value?	Two-tailed
				Welch-corrected t, df	t=2.183, df=5.733
				How big is the difference?
				Mean of column A	1197
				Mean of column B	1859
				Difference between means (B - A) ± SEM	662.0 ± 303.2
				95% confidence interval	-88.36 to 1412
				R squared (eta squared)	0.454
				F test to compare variances
				F, DFn, Dfd	4.388, 4, 4
				P value	0.1811
				P value summary	ns
				Significantly different (P < 0.05)?	No
				Data analyzed
				Sample size, column A	5
				Sample size, column B	5

## Sheet: 13C_Malate
WT	R403Q +/-			Table Analyzed	13C_Malate
3496.03	9196.37
2421.03	6928.75			Column B	R403Q +/-
1456.77	7299.72			vs.	vs.
2625.81	10037.4			Column A	WT
3112.11	2710.4
				Unpaired t test with Welch's correction
				P value	0.0198
				P value summary	*
				Significantly different (P < 0.05)?	Yes
				One- or two-tailed P value?	Two-tailed
				Welch-corrected t, df	t=3.503, df=4.592
				How big is the difference?
				Mean of column A	2622
				Mean of column B	7235
				Difference between means (B - A) ± SEM	4612 ± 1317
				95% confidence interval	1135 to 8089
				R squared (eta squared)	0.7277
				F test to compare variances
				F, DFn, Dfd	13.43, 4, 4
				P value	0.0275
				P value summary	*
				Significantly different (P < 0.05)?	Yes
				Data analyzed
				Sample size, column A	5
				Sample size, column B	5

## Sheet: 13C_Succinate
WT	R403Q +/-			Table Analyzed	13C_Succinate
307.793	230.551
406.21	210.444			Column B	R403Q +/-
300.599	162.944			vs.	vs.
444.744	143.962			Column A	WT
370.461	279.84
				Unpaired t test with Welch's correction
				P value	0.0026
				P value summary	**
				Significantly different (P < 0.05)?	Yes
				One- or two-tailed P value?	Two-tailed
				Welch-corrected t, df	t=4.344, df=7.853
				How big is the difference?
				Mean of column A	366
				Mean of column B	205.5
				Difference between means (B - A) ± SEM	-160.4 ± 36.93
				95% confidence interval	-245.9 to -74.97
				R squared (eta squared)	0.7061
				F test to compare variances
				F, DFn, Dfd	1.316, 4, 4
				P value	0.7964
				P value summary	ns
				Significantly different (P < 0.05)?	No
				Data analyzed
				Sample size, column A	5
				Sample size, column B	5

## Sheet: 13_Alanine
WT	R403Q +/-			Table Analyzed	13_Alanine
34454.7	66681.7
36897.3	84130			Column B	R403Q +/-
28737.9	77520.7			vs.	vs.
34396.7	73073.1			Column A	WT
34255.5	28454.5
				Unpaired t test with Welch's correction
				P value	0.0295
				P value summary	*
				Significantly different (P < 0.05)?	Yes
				One- or two-tailed P value?	Two-tailed
				Welch-corrected t, df	t=3.257, df=4.151
				How big is the difference?
				Mean of column A	33748
				Mean of column B	65972
				Difference between means (B - A) ± SEM	32224 ± 9894
				95% confidence interval	5143 to 59305
				R squared (eta squared)	0.7188
				F test to compare variances
				F, DFn, Dfd	53.09, 4, 4
				P value	0.002
				P value summary	**
				Significantly different (P < 0.05)?	Yes
				Data analyzed
				Sample size, column A	5
				Sample size, column B	5

[truncated: 1 more sheets: BPTES_Treatment]
