# Supplementary material for: Multi-Omics Profiling of Hypertrophic Cardiomyopathy Reveals Altered Mechanisms in Mitochondrial Dynamics and Excitation–Contraction Coupling
Source: Int J Mol Sci. 2023 Mar 1;24(5):4724. doi: 10.3390/ijms24054724 (PMC10002553; doi:10.3390/ijms24054724)
Supplement: Supplementary file 1 [file ijms-24-04724-s001.zip › Supp_Table_S8.xlsx]

## Sheet: 13C5Glutamine
WT	R403Q +/-			Table Analyzed	13C5Glutamine
7.07471e+08	1043498843
721516964	9.56148e+08			Column B	R403Q +/-
5.30855e+08	829062509			vs.	vs.
5.6676e+08	9.11645e+08			Column A	WT
6.00282e+08	918384763
6.37643e+08	8.99719e+08			Unpaired t test with Welch's correction
4.81415e+08	7.83824e+08			P value	<0.0001
				P value summary	****
				Significantly different (P < 0.05)?	Yes
				One- or two-tailed P value?	Two-tailed
				Welch-corrected t, df	t=6.474, df=11.96
				How big is the difference?
				Mean of column A	606563145
				Mean of column B	906040211
				Difference between means (B - A) ± SEM	299477066 ± 46258094
				95% confidence interval	198656256 to 400297875
				R squared (eta squared)	0.7779
				F test to compare variances
				F, DFn, Dfd	1.115, 6, 6
				P value	0.8982
				P value summary	ns
				Significantly different (P < 0.05)?	No
				Data analyzed
				Sample size, column A	7
				Sample size, column B	7

## Sheet: 13C5 Alpha-ketoglutarate
WT	R403Q +/-			Table Analyzed	13C5 Alpha-ketoglutarate
1.64089e+07	2.05541e+07
1.09952e+07	1.96003e+07			Column B	R403Q +/-
1.59656e+07	1.53043e+07			vs.	vs.
1.54225e+07	1.82536e+07			Column A	WT
9.54988e+06	1.6022e+07
1.26803e+07	1.91412e+07			Unpaired t test with Welch's correction
	1.6871e+07			P value	0.0115
	1.70654e+07			P value summary	*
				Significantly different (P < 0.05)?	Yes
				One- or two-tailed P value?	Two-tailed
				Welch-corrected t, df	t=3.258, df=8.029
				How big is the difference?
				Mean of column A	13503714
				Mean of column B	17851467
				Difference between means (B - A) ± SEM	4347752 ± 1334543
				95% confidence interval	1272249 to 7423255
				R squared (eta squared)	0.5693
				F test to compare variances
				F, DFn, Dfd	2.419, 5, 7
				P value	0.2806
				P value summary	ns
				Significantly different (P < 0.05)?	No
				Data analyzed
				Sample size, column A	6
				Sample size, column B	8

## Sheet: 13C4 Glutathione (GSH)
WT	R403Q +/-			Table Analyzed	13C4 Glutathione (GSH)
368744	2.96534e+06
329799	2.35644e+06			Column B	R403Q +/-
165227	649341			vs.	vs.
260514	1.30344e+06			Column A	WT
698823	1.62601e+06
1.63467e+06	257569			Unpaired t test with Welch's correction
333481	779952			P value	0.0521
1.02875e+06	1.24552e+06			P value summary	ns
				Significantly different (P < 0.05)?	No
				One- or two-tailed P value?	Two-tailed
				Welch-corrected t, df	t=2.178, df=10.96
				How big is the difference?
				Mean of column A	602501
				Mean of column B	1397951
				Difference between means (B - A) ± SEM	795450 ± 365187
				95% confidence interval	-8716 to 1599615
				R squared (eta squared)	0.3022
				F test to compare variances
				F, DFn, Dfd	3.229, 7, 7
				P value	0.1448
				P value summary	ns
				Significantly different (P < 0.05)?	No
				Data analyzed
				Sample size, column A	8
				Sample size, column B	8
