# Supplementary material for: Multi-Omics Profiling of Hypertrophic Cardiomyopathy Reveals Altered Mechanisms in Mitochondrial Dynamics and Excitation–Contraction Coupling
Source: Int J Mol Sci. 2023 Mar 1;24(5):4724. doi: 10.3390/ijms24054724 (PMC10002553; doi:10.3390/ijms24054724)
Supplement: Supplementary file 1 [file ijms-24-04724-s001.zip › Supp_Table_S9.xlsx]

## Sheet: fgsea_Proteomics_MYH7_WT_human_
Term	Description	p.Val	FDR	Phenotype	Genes	NES	ES	Gene_Hits	Gene_Total
GLYCOAMINOGLYCAN-PROTEIN LINKAGE REGION BIOSYNTHESIS	GLYCOAMINOGLYCAN-PROTEIN LINKAGE REGION BIOSYNTHESIS	0.000178126	0.00390252	1	ACTN1,DAG1,SDC2,GOLIM4,TGFB2,LAMB2,EPHB4,CASK,TGFB1,LAMA5,AGRN,HSPG2,BGN,LTBP2,VCAN,ITGB3,COL6A1,EXT2,KIAA1468,IGF2,SGCA,ITGB5,COL18A1,SEC62,XRN1,NID2,DCN,ITGAV,COL14A1,LAMA2,PTN,APOA4,B3GALT6,CD44,LAMA3,ITGB1,ENAH,ADAMTS4,TGFB3,SEC22B,LAMA4,NID1,NPNT,APOE,FBLN2,HEATR3,PCOLCE,FAM134C,NCK1,APCS,EGFR,COLEC12,FGF1,CHRD,NCK2,CLASP1,FLT1,LAMC1,FBN1,APOB,LAMC3	2.313	0.589372	61	116
HEPARAN SULFATE BIOSYNTHESIS (LATE STAGES)	HEPARAN SULFATE BIOSYNTHESIS (LATE STAGES)	0.000178603	0.00390252	1	ACTN1,DAG1,SDC2,LAMB2,EPHB4,FYN,CASK,TGFB1,LAMA5,AGRN,HSPG2,BGN,VCAN,ITGB3,FMOD,OGN,EXT2,ITGB5,PRELP,PPP3CC,LUM,NID2,DCN,ITGAV,LAMA2,APOA4,B3GALT6,LAMA3,ITGB1,ENAH,RB1CC1,HLA-DPA1,LAMA4,NID1,OMD,SULT1A1,APP,APOE,FBLN2,NCK1,UPF2,APCS,NAAA,NCK2,CLASP1,PLCG1,LAMC1,XIAP,APOB,LAMC3,VASP,GPC1,ACAN,GRB2,CSPG4	2.19387	0.567735	55	104
CHONDROITIN AND DERMATAN BIOSYNTHESIS	CHONDROITIN AND DERMATAN BIOSYNTHESIS	0.000179051	0.00390252	1	FBXW11,TGFB2,TGFB1,BGN,VCAN,ELN,COL6A1,HAPLN1,FLNA,PF4,IGF2,SGCA,COL18A1,MIB2,MFAP2,DCN,COL5A1,LMO7,CDK4,COL14A1,INSR,B3GALT6,GJA1,CD44,ADAMTS4,ARFGEF2,TGFB3,SLC2A4,APP,TRIP12,FBLN2,RNF114,PCOLCE,COL5A3,EGFR,HSPB2,FGF1,CHRD,FBXL20,RBL2,FBN1,APOB,CXCL12	1.99097	0.516854	43	102
CHONDROITIN SULFATE BIOSYNTHESIS (LATE STAGES)	CHONDROITIN SULFATE BIOSYNTHESIS (LATE STAGES)	0.000179211	0.00390252	1	SDC2,TGFB2,TGFB1,AGRN,HSPG2,BGN,VCAN,FMOD,COL6A1,OGN,CANX,EXT2,IGF2,SGCA,COL18A1,PRELP,LUM,DCN,COL14A1,INSR,ERC1,B3GALT6,CBL,CD44,ITGB1,ADAMTS4,TGFB3,HLA-DPA1,OMD,SULT1A1,LPGAT1,APP,SLC43A3,RAPGEF1,ITM2B,NAAA,EGFR,FGF1,CHRD,FBN1,APOB,RASA3,GPC1,ACAN,SDF4,UGGT1,CSPG4	2.01151	0.527875	47	95
DERMATAN SULFATE BIOSYNTHESIS (LATE STAGES)	DERMATAN SULFATE BIOSYNTHESIS (LATE STAGES)	0.00018031	0.00390252	1	SDC2,TGFB2,TGFB1,AGRN,HSPG2,BGN,VCAN,FMOD,COL6A1,FLNA,OGN,CANX,EXT2,IGF2,SGCA,COL18A1,PRELP,LUM,DCN,COL14A1,INSR,ERC1,B3GALT6,CBL,CD44,ITGB1,ADAMTS4,TGFB3,HLA-DPA1,OMD,SULT1A1,LPGAT1,APP,SLC43A3,ACTB,RAPGEF1,PCOLCE,EGFR,ACSL4,FGF1,CHRD	2.08512	0.550723	41	92
MEVALONATE PATHWAY I	MEVALONATE PATHWAY I	0.000235627	0.00390252	-1	PMVK,RPS15A,NEDD8,MVD,GPI,PSMD14,HMGCR,PSMA7,WDR36,ACAT1,MVK,ALDOA,PPP2CA,HMGCS2,PSMA6,PPP2CB,UTP15,HIST3H2A,PFKM,IDI1,CNBP,ENO1,SUGT1,ATG5,EIF5A2,SUMO2,CSE1L,HSPA1B,USP10,PGAM2,NEDD4L,EEF2,OTUB1,SCPEP1,KATNB1,SSB,ACAT2,STARD13,EEF1A2,PRPF40A,ABCE1,PITPNA,CLN5,RPS20,NEDD4,RPS24,ATP6V1E1,CCT7,BMS1,EIF5A,EIF4EBP1,YWHAZ	-1.71701	-0.406737	52	153
SELENOCYSTEINE BIOSYNTHESIS II (ARCHAEA AND EUKARYOTES)	SELENOCYSTEINE BIOSYNTHESIS II (ARCHAEA AND EUKARYOTES)	0.000236463	0.00390252	-1	SEPHS1,CHCHD2,KPNA2,WARS,FASN,PSMA4,MVD,AK6,PSMD14,PTGES3,HIST1H2AD,H2AFX,CDK2,PSMA7,WDR36,TPRKB,BRIX1,PSMA6,TUFM,UTP15,EIF4A1,QRICH1,HIST3H2A,SIRT2,PFDN6,VPS4A,CNBP,EPRS,NEK7,HSPA1B,USP10,CCT4,PAK2,DHX15,RPLP2,UBE2B,EIF4A2,SQSTM1,SUCLG2,SARS,COPG2,CCT7,BMS1,NOMO3,PRKACG,SUCLA2,FBL,NXF1,PSMC5,DDX49,UNC119,PPP2R1A	-1.59572	-0.377938	52	154
5-AMINOIMIDAZOLE RIBONUCLEOTIDE BIOSYNTHESIS I	5-AMINOIMIDAZOLE RIBONUCLEOTIDE BIOSYNTHESIS I	0.000237982	0.00390252	-1	ENO3,PSMA4,GBAS,NEDD8,MVD,GPI,AK6,PSMD14,HIST1H2AD,H2AFX,PPP1CC,LCP1,PAPOLA,PGD,PSMA7,WDR36,ACAT1,NPEPPS,FDPS,VBP1,ALDH2,DNAJA1,PPP1CA,BRIX1,PSMA6,UTP15,EIF4A1,HIST3H2A,AKR1D1,PFKM,PFAS,CNBP,BCAT2,SUMO2,HSPA1B,USP10,FAM96B,NEDD4L,DHX15,EEF2,OTUB1,RPLP2,PYGM,EIF4A2,ACAT2,MDH2	-1.71592	-0.403093	46	165
TYROSINE BIOSYNTHESIS IV	TYROSINE BIOSYNTHESIS IV	0.000239751	0.00390252	-1	RPS15A,EIF4E,EIF5,NDUFA12,RPS13,ATP5H,RPS18,PPP2CA,RPS9,ATP5C1,MAGOH,EIF4A1,RPL9,ATP5A1,RPS16,RPS7,NCBP2,NDUFA6,ATP5O,EIF3I,RPS4X,GSPT1,EEF2,ATP5J,RPS17,RPLP2,EIF2S1,PPA2,EIF3F,EIF4A2,NDUFA5,PPA1,EIF3M,EIF2S3,RPS12,QDPR,CASC3,RPS3,TMEM126B,RPS20,ETF1,RPS24,EIF3J,RPL23,EIF4B,ECSIT,RPS27,RPSA,PPP2R2A,RPS21,NDUFA11,ATP6AP2,RPS15,SRP72,NDUFA9,MT-ATP6,PPP2R1A,GSPT2,ATP5D,SMG9,HNRNPH1,HNRNPH2,SRP9,RPS2…	-1.79439	-0.410682	111	204
ASPARTATE DEGRADATION II	ASPARTATE DEGRADATION II	0.000239751	0.00390252	-1	CACYBP,HINT1,WARS,RPS15A,NEDD8,IDH1,PSMD14,PPME1,PGD,CDK2,NPEPPS,ALDOA,RGN,ALDH2,PSMA6,MDH1,COPS5,EIF4A1,PARK7,GPD1,TXNRD2,TXN,RABGGTB,ENO1,TXN2,GOT1,ATG5,EIF5A2,SUMO2,TUBB2B,CSE1L,MAPK14,HSPA1B,PSMA3,ACAA2,PGAM2,EEF1D,FH,PAK2,NEDD4L,NAA15,EEF2,ATP5J,TRIM63,EIF4A2,AKR1B1,MDH2,EIF2S3,PSMC1,EEF1A2,PRPF40A,PREPL,CTNNBIP1,NEDD4,MAPK13,CALR,C9ORF64,EIF5A,UCHL3,ARHGDIB,PCNA,YWHAZ,ARHGDIA,STIP1,NME1,HAR…	-1.70384	-0.39497	68	184
PENTOSE PHOSPHATE PATHWAY (OXIDATIVE BRANCH)	PENTOSE PHOSPHATE PATHWAY (OXIDATIVE BRANCH)	0.000240269	0.00390252	-1	ENO3,RCHY1,IMPA2,PSMA4,NEDD8,PSMD14,PSMB6,KARS,PPP1CC,OLA1,PSMA1,PGD,CDK2,PSMB3,PSMA7,GLO1,PSMB4,GLUL,FDPS,RGN,PSMC2,ALDH2,PSMB7,DNAJA1,PPP1CA,PSMA6,EIF4A1,SIRT2,TXNRD2,CNBP,PSMB2,RPS7,PSMA2,ENO1,PSMD7,TARSL2,USP14,SUMO2,TALDO1,CSE1L,HSPA1B,PSMB8,USP10,PSMA3,RPS4X,PABPC4,PAK2,NEDD4L,EEF2,EIF4A2,MDH2,PSMC1,EEF1A2,PRPF40A,IMPA1,NEDD4,RPS24	-1.84947	-0.428301	57	186
LEUCINE DEGRADATION I	LEUCINE DEGRADATION I	0.000240385	0.00390252	-1	ENO3,LGALS3,NEDD8,RARS2,GPI,PSMD14,KARS,LCP1,OLA1,PGD,ACAT1,NPEPPS,ALDOA,FDPS,ALDH2,DNAJA1,ACSS2,ATP5C1,COPS5,EIF4A1,AKR1D1,PFKM,GCAT,PFAS,MCCC2,HLCS,ACADVL,BCAT2,ECH1,GFOD1,C1QBP,EIF5A2,SUMO2,CSE1L,HSPA1B,PGAM2,ECI2,PABPC4,PTEN,FPGS,EEF2,OTUB1,PYGM,PPA2,EIF4A2,PPA1,ACAT2,CUL4B,MDH2,EEF1A2,GALK2	-1.58509	-0.370021	51	174
KETOGENESIS	KETOGENESIS	0.000240385	0.00390252	-1	PSMA4,RPS15A,NEDD8,PSMD14,PSMA1,PSMB3,BDH1,PSMA7,ACAT1,PSMB4,ALDOA,RUVBL1,FDPS,PPP2CA,PSMB7,HMGCS2,DNAJA1,PSMA6,PPP2CB,COPS5,AKR1D1,PFKM,PFAS,CNBP,PSMB2,PSMA2,ACADVL,BCAT2,IGBP1,ATG5,SUMO2,TUBB2B,CSE1L,HSPA1B,PSMB8,USP10,PSMA3,COQ9,PGAM2,PPP2R2D,FPGS,EEF2,OTUB1,SCPEP1,ACAT2,HDAC6,EEF1A2,ABCE1,CLN5,RPS24,ATP6V1E1,PPP2R5D,NUDCD1,PPP2R5C,RPSA,YWHAZ,PPP2R2A,AKR1C1	-1.62651	-0.37969	58	174
THIOSULFATE DISPROPORTIONATION III (RHODANESE)	THIOSULFATE DISPROPORTIONATION III (RHODANESE)	0.000240558	0.00390252	-1	ENO3,MOCS2,NEDD8,NDUFS7,UBE2N,SKI,HIST2H2BE,NDUFA12,PSMD14,HIST1H2AD,H2AFX,PGD,CDK2,ETHE1,RUVBL1,ALDH2,PSMA6,EIF4A1,DDX39A,HIST3H2A,PFKM,NDUFA10,NDUFB7,MPST,ENO1,TST,NDUFA6,SUMO2,MOCS3,HSPA1B,NDUFAB1,NEDD4L,NDUFV2,EEF2,NDUFB3,PPA2,EIF4A2,NDUFA5,PPA1,NDUFA4,EEF1A2,RPS3,TMEM126B,NEDD4,ECSIT,NDUFB9,RARS,NDUFS3,RPSA,PCNA,NDUFA11,PHB2,UBA2,MT-ND1,RBX1,NFKBIA,ACTC1,NDUFA9,NDUFS6,NDUFS1,XRCC6,NDUFS8,POL…	-1.57293	-0.364543	80	185
<IMYO</I-INOSITOL BIOSYNTHESIS	<IMYO</I-INOSITOL BIOSYNTHESIS	0.000242895	0.00390252	-1	S100B,ENO3,IMPA2,HINT1,RPS15A,EIF4E,ATP6V1D,SHMT1,GPI,PTGES3,PPP1CC,LCP1,PGD,ALDOA,PPP2CA,RGN,ALDH2,DNAJA1,PPP1CA,PPP2CB,EIF4A1,AKR1D1,PFKM,TXN,ATP5A1,CNBP,ENO1,PSMD7,GOT1,EIF5A2,SUMO2,PPP6C,ECHS1,HSPA1B,ACAA2,PGAM2,GALT,CCT4,EEF1D,RUVBL2,NEDD4L,EEF2,PREP,EIF2S1,PYGM,ASNA1,AKR1B1,MDH2,EIF2S3,ABCE1,CAP2,IMPA1,HSF2,NEDD4,ASS1,UBA3,SARS,CALR,ALDH1A1,EIF5A,UCHL3,ARHGDIB,PCNA,PPP2R2A,RPS6KA5,AKR1C1,AR…	-1.61645	-0.373416	68	191
D-<IMYO</I-INOSITOL (1,4,5)-TRISPHOSPHATE BIOSYNTHESIS	D-<IMYO</I-INOSITOL (1,4,5)-TRISPHOSPHATE BIOSYNTHESIS	0.000357207	0.00538043	1	TGM2,PLCB4,GNAO1,FYN,GNA14,SLC9A3R1,CDIPT,NOM1,GNAI1,PI4KA,FARP2,GNAI2,PDGFRB,TTC7B,GNA11,INSR,TLN1,CBL,HLA-DRB1,PI4K2A,HLA-DPA1,GNAQ,INPP5D,PIP5K1C,PLCD3,ACTB,VAV2,PLCD1,ERLIN2,NCK1,EGFR,FGF1,AP2A2,DNM2,YWHAQ,PLCG1,WASL,EEF1A1,PLCG2,ARF6	1.69427	0.438446	40	104
LIPOATE BIOSYNTHESIS AND INCORPORATION II	LIPOATE BIOSYNTHESIS AND INCORPORATION II	0.000475964	0.00674749	-1	ENO3,IST1,SHMT1,CHMP2B,GGCT,GPN1,HIST1H2AD,H2AFX,PPP1CC,MCM4,CHMP2A,PGD,CDK2,NPEPPS,ZBTB16,PSMC2,DNAJA1,PPP1CA,BCKDHB,TUFM,EIF4A1,HIST3H2A,VPS4A,ATP5A1,CNBP,PSMB2,SUMO2,CHMP7,HSPA1B,GSPT1,NDUFAB1,PABPC4,GCSH,NEDD4L,VPS37A,EEF2,PSMC1,VTA1,ATP6V1E1,BCKDHA,MRI1,ORC4,POR,PPP2R2A,STIP1,FBL,CHMP1B,LIAS,EP300,PSMC5,PPP2R1A,OSBPL11,RPA3,PKM,CHMP3,CDKN1B,YWHAE,XRCC6,SLC25A4,TSG101	-1.57363	-0.369667	60	165
BILE ACID BIOSYNTHESIS, NEUTRAL PATHWAY	BILE ACID BIOSYNTHESIS, NEUTRAL PATHWAY	0.000934143	0.0125071	-1	ENO3,PIN4,PCK2,GPI,PSMD14,KARS,LCP1,OLA1,PGD,ACAT1,NPEPPS,PFDN5,FDPS,DIRAS1,ALDH2,ACSS2,EIF4A1,HSD17B4,AKR1D1,PFKM,PFDN6,PFAS,BCAT2,EIF5A2,SUMO2,CSE1L,HSPA1B,COA7,ECI2,PABPC4,EEF2,PYGM,PPA2,EIF4A2,SCP2,PPA1,AKR1B1,ACAT2,MDH2,PITPNA,GALK2	-1.53855	-0.368603	41	141
EUMELANIN BIOSYNTHESIS	EUMELANIN BIOSYNTHESIS	0.00104022	0.0131944	1	ACTN1,DAG1,TJP1,FYN,ITGA1,ITGB3,ITGB5,COL8A1,MYL6B,MYH11,CALD1,IKBIP,STX3,RAP1B,TLN1,ACTN4,GJA1,NFIX,ANXA2,GSN,PXN,ENAH,TUBB4B,VCL,SORBS3,ACTB,SRPK2,SORBS1,HNRNPH3,TUBA1A,SORBS2,MYL6,NCK1,RNF2,FXR1,HDAC2,PDIA3,ACTG1,HSPE1,PTK2,IGF2BP2,IPO13,YWHAH,ACTA2,TPM3,RBL2,XIAP,FGG,MYL12A,UBAP2L,VASP,TPM4,NCOA1,FGB,LMOD1,GRB2,TGFB1I1,LAP3,CLTC,FGA,BIRC6,FOCAD,C14ORF166,HRAS,DDX1,CTNNB1,MYL9	1.60057	0.393649	67	151
GLUCOSE AND GLUCOSE-1-PHOSPHATE DEGRADATION	GLUCOSE AND GLUCOSE-1-PHOSPHATE DEGRADATION	0.00120192	0.0144832	-1	S100B,ENO3,HINT1,NUP43,ATP6V1D,PSMD14,PTGES3,PPP1CC,PGD,PSMA7,DNASE2,TPT1,ALDOA,RGN,PPP1CA,PSMA6,AKR1D1,TXNRD2,PFKFB1,TXN,ATP5A1,ENO1,TXN2,EIF5A2,SUMO2,CSE1L,HSPA1B,USP10,ACAA2,NUTF2,PGAM2,EEF1D,EEF2,NUP155,AKR1B1,MDH2,EIF2S3,CAP2,CALR,EIF5A,UCHL3,PRKACG,ARHGDIB,PCNA,YWHAZ,RPS6KA5,RPS21,AKR1C1,ARHGDIA,STIP1,NME1,NUP50,ATL2,AARS,PPP2R1A,CALU,CCT3,YWHAE,GARS,ATP5B,GSTO1,IARS,GAPDH,HSP90AB1,NUP160,M…	-1.48323	-0.344175	78	183
L-GLUTAMINE BIOSYNTHESIS II (TRNA-DEPENDENT)	L-GLUTAMINE BIOSYNTHESIS II (TRNA-DEPENDENT)	0.00156111	0.0179156	-1	PSME2,PSMA4,SAA1,PSME1,S1PR3,ADRM1,PSMD14,PSMB6,PSMA1,PSMB3,PSMA7,PSMB4,NPEPPS,PSMC2,PSMB7,PSMA6,PSMB2,PSMA2,PSMD7,USP14,HSPA1B,PSMB8,PSMA3,PSMD5,PSMC1,QRSL1	-1.71897	-0.451077	26	78
D-<IMYO</I-INOSITOL (1,3,4)-TRISPHOSPHATE BIOSYNTHESIS	D-<IMYO</I-INOSITOL (1,3,4)-TRISPHOSPHATE BIOSYNTHESIS	0.00191738	0.0187321	1	MYH10,NCOR2,CAV1,CAMK2G,ATP2B4,PIBF1,SLC9A1,DLG3,PPP3CC,SNCA,EXOC2,MYL6B,MYH11,DBN1,CAMK2B,PYGB,BAD,ANXA7,VIM,MYO1C,CAMK2A,MBP,MYLK,TBC1D1,AKAP9,INPP5A,ACTB,EXOC7,EXOC3,TUBA1A,MYL6,DLG1,CSNK2A1,MOV10,ACE2,EGFR,ACTG1,MYH9,NOS3,YWHAQ,PHKA1,RAF1,ARHGEF2,LNPEP,YWHAH,CAMK2D,MYO6,EXOC5,EEF1A1,MYL12A,MYH14,IQGAP1,EXOC4,EXOC1,MAP3K5	1.57353	0.389804	55	143
PHENYLALANINE DEGRADATION IV (MAMMALIAN, VIA SIDE CHAIN)	PHENYLALANINE DEGRADATION IV (MAMMALIAN, VIA SIDE CHAIN)	0.00192678	0.0187321	-1	ENO3,EIF1,EIF4E,NEDD8,SHMT1,GPI,PSMD14,OLA1,PGD,CDK2,ACAT1,NPEPPS,TPT1,ALDOA,FDPS,ALDH2,HMGCS2,ACSS2,ASL,ATP5C1,EIF4A1,PFKM,TXN,ATP5A1,PRDX5,ASPSCR1,ATG5,TARSL2,SUMO2,EIF3I,HSPA1B,NUTF2,COQ9,PGAM2,PAK2,NEDD4L,EEF2,PPA2,RRM2B,EIF4A2,PPA1,ACAT2,EEF1A2,PRPF40A,GALK2,PREPL,CTNNBIP1,NEDD4,BTF3,ATP6V1E1,SARS	-1.47567	-0.342934	51	181
KETOLYSIS	KETOLYSIS	0.00192678	0.0187321	-1	EIF1,NEDD8,SHMT1,GPI,PSMD14,KARS,LCP1,OLA1,PGD,BDH1,ACAT1,NPEPPS,ALDOA,FDPS,ALDH2,ACSS2,ASL,COPS5,EIF4A1,AKR1D1,PFKM,PFAS,CNBP,BCAT2,ECH1,C1QBP,ATG5,EIF5A2,SUMO2,EIF3I,HSPA1B,CNDP2,USP10,COQ9,PABPC4,FH,EEF2,OTUB1,PYGM,PPA2,EIF4A2,C7ORF55,PPA1,ACAT2,MDH2,HDAC6,ABCE1,GALK2	-1.4705	-0.341732	48	181
SUCROSE DEGRADATION V (MAMMALIAN)	SUCROSE DEGRADATION V (MAMMALIAN)	0.00194316	0.0187321	-1	ENO3,GLUD2,IDH2,HADHA,NEDD8,HK3,IDH1,ALDOC,NDUFA12,PSMD14,AHSA1,H2AFX,UQCRH,ACAT1,NPEPPS,ALDOA,UQCRB,PRDX1,CKM,PARK7,TNNI3,ATP5A1,LDHB,ENO1,ACADVL,NDUFA6,UQCRQ,SUMO2,TUBB2B,SMAD4,MAPK14,HSPA1B,USP10,PSMA3,ACAA2,LDHA,PGAM2,MAP2K4,NDUFV2,TPM1,TRIM63,NDUFB3,OTUB1,PYGM,NDUFA5,TPI1,ACAT2,MDH2,NDUFA4,EEF1A2,NRAS,MAPK13,ATP6V1E1,BCKDHA,UCHL5,HADH,NDUFB9,NDUFS3,UQCRC1,CKMT2,CKB,PCNA,UQCR10,YWHAZ	-1.46816	-0.339161	64	191
ALL-<ITRANS</I-DECAPRENYL DIPHOSPHATE BIOSYNTHESIS	ALL-<ITRANS</I-DECAPRENYL DIPHOSPHATE BIOSYNTHESIS	0.00264805	0.0245454	-1	PPIL1,CD2BP2,POLR2G,NDUFS7,NDUFA12,SNRPG,PAPOLA,CSTF1,HMGCS2,SNRPB2,PRKCD,MAGOH,COQ6,NDUFA10,NDUFB7,PPIH,NCBP2,NDUFA6,CDC40,SNRPD3,POLR2H,SNRPA1,HSPA1B,PPWD1,SNRPF,TXNL4A,NUDT21,NDUFAB1,NDUFV2,DHX15,CCAR1,NDUFB3,LSM4,NDUFA5,PRPF40A,LSM2,TMEM126B,CTNNBL1,SRSF11,LSM7,ECSIT,NDUFB9,GPKOW,NDUFS3,POLR2J,SNRPE,FIP1L1,SRSF3,NDUFA11,MT-ND1,RBX1,NDUFA9,DNAJC8,DHX38,SNRPC,NDUFS6,SNRPN,CPSF7,HNRNPH1,HNRNPH2,…	-1.41811	-0.323984	78	208
1D-<IMYO</I-INOSITOL HEXAKISPHOSPHATE BIOSYNTHESIS II (MAMMALIAN)	1D-<IMYO</I-INOSITOL HEXAKISPHOSPHATE BIOSYNTHESIS II (MAMMALIAN)	0.00367133	0.030191	1	MYH10,NCOR2,CAV1,CAMK2G,ATP2B4,PIBF1,SLC9A1,DLG3,PPP3CC,SNCA,EXOC2,MYL6B,MYH11,DBN1,CAMK2B,PYGB,BAD,ANXA7,MYO1C,CAMK2A,MBP,MYLK,TBC1D1,AKAP9,INPP5A,ACTB,EXOC7,EXOC3,TUBA1A,MYL6,DLG1,CSNK2A1,MOV10,ACE2,EGFR,ACTG1,MYH9,NOS3,YWHAQ,PHKA1,RAF1,ARHGEF2,LNPEP,YWHAH,CAMK2D,MYO6,EXOC5,EEF1A1,MYL12A,MYH14,IQGAP1,EXOC4,EXOC1,MAP3K5	1.52328	0.377753	54	141
CALCIUM TRANSPORT I	CALCIUM TRANSPORT I	0.00382675	0.030191	1	HSPA2,ACTN1,TUBB8,MYH10,CASK,XPC,SRPRB,ATP2B4,SLC25A6,DLG3,TMEM30A,MYH11,KDSR,TUBB1,HACD3,ACTN4,DGUOK,TCIRG1,TMEM173,FAF2,SEC24B,TUBB4B,ATP2B1,HLA-DPA1,APP,SERINC3,TUBB,SLC43A3,TECR,ORAI1,VDAC1,TUBA8,TUBA1A,ATP1A3,CNOT1,DLG1,STIM1,PIK3R4,MYH7B,ITPR3,CSNK2A1,GABARAPL2,RNF2,EGFR,VDAC2,SLC25A5,MYH9,YWHAQ,ZFR,SEC23A	1.48863	0.364123	50	157
GLUTAMATE DEGRADATION II	GLUTAMATE DEGRADATION II	0.00383601	0.030191	-1	ENO3,EIF1,EIF4E,NEDD8,SHMT1,GPI,PSMD14,OLA1,PGD,CDK2,ACAT1,NPEPPS,TPT1,ALDOA,FDPS,ALDH2,HMGCS2,ACSS2,ASL,ATP5C1,EIF4A1,PFKM,TXN,ATP5A1,PRDX5,BCR,ATG5,TARSL2,SUMO2,EIF3I,HSPA1B,NUTF2,PGAM2,PAK2,NEDD4L,EEF2,PYGM,PPA2,RRM2B,EIF4A2,PPA1,ACAT2,EEF1A2,PRPF40A,GALK2,PREPL,CTNNBIP1,NEDD4,BTF3,ATP6V1E1,SARS	-1.44027	-0.333871	51	184
ASPARTATE BIOSYNTHESIS	ASPARTATE BIOSYNTHESIS	0.00383601	0.030191	-1	ENO3,EIF1,EIF4E,NEDD8,SHMT1,GPI,PSMD14,OLA1,PGD,CDK2,ACAT1,NPEPPS,TPT1,ALDOA,FDPS,ALDH2,HMGCS2,ACSS2,ASL,ATP5C1,EIF4A1,PFKM,TXN,ATP5A1,PRDX5,BCR,ATG5,TARSL2,SUMO2,EIF3I,HSPA1B,NUTF2,PGAM2,PAK2,NEDD4L,EEF2,PYGM,PPA2,RRM2B,EIF4A2,PPA1,ACAT2,EEF1A2,PRPF40A,GALK2,PREPL,CTNNBIP1,NEDD4,BTF3,ATP6V1E1,SARS	-1.44027	-0.333871	51	184
CITRULLINE DEGRADATION	CITRULLINE DEGRADATION	0.0038835	0.030191	-1	ENO3,EIF4E,UBE2V1,GPD1L,SEC23B,SHMT1,GPI,UBE2N,HIST2H2BE,PSMD14,HIST1H2AD,H2AFX,MCM4,PGD,PSMB3,ACAT1,TPT1,ALDH2,DNAJA1,BRIX1,PSMA6,ATP5C1,GPD1,HIST3H2A,PFKM,ATP5A1,PSMB2,PRDX5,UBE2V2,PSMD7,TALDO1,HSPA1B,USP10,CCT2,PGAM2,PABPC4,GALT,CCT4,FH,PAK2,EEF2,PYGM,NOP2,PPA1,MDH2,EIF2S3,PSMC1,EEF1A2,GALK2,ETF1,ATP6V1E1	-1.41106	-0.326291	51	190
ACETATE CONVERSION TO ACETYL-COA	ACETATE CONVERSION TO ACETYL-COA	0.00484848	0.0362134	-1	ENO3,WARS,EIF1,ACSS3,SHMT1,GPI,PSMD14,CPT2,LCP1,OLA1,PGD,CDK2,ACAT1,NPEPPS,RUVBL1,FDPS,PPP2CA,ALDH2,ACSS2,ASL,PPP2CB,EIF4A1,AKR1D1,PFKM,PFAS,TXN,BCAT2,GOT1,SUMO2,TUBB2B,CSE1L,HSPA1B,USP10,PGAM2,ECI2,MDN1,CCT4,FH,EEF2,PYGM,PPA2,MDH2,EEF1A2,RPS3,GALK2,EEF1B2,C4ORF27,ALDH1A1,CCS,EIF5A,LARS,RPSA	-1.39656	-0.322506	52	192
PALMITATE BIOSYNTHESIS I (ANIMALS)	PALMITATE BIOSYNTHESIS I (ANIMALS)	0.00495868	0.0362134	-1	CLASP2,FASN,UBE2V1,NEDD8,COX6A2,UBE2N,AHSA1,NOVA2,AASDHPPT,H2AFX,PPP1CC,ATP5H,CDK2,DNAJA1,MAGOH,BRE,UBE2V2,BCL10,SUMO2,MAPK14,TP53BP1,NDUFAB1,PTEN,ATP5J,OTUB1,IRF3,USP2,NUP155,UBE2B,CUL4B,NDUFA4,SQSTM1	-1.44212	-0.344392	32	146
D-<IMYO</I-INOSITOL-5-PHOSPHATE METABOLISM	D-<IMYO</I-INOSITOL-5-PHOSPHATE METABOLISM	0.0059034	0.0418447	1	TGM2,PLCB4,GNAO1,FYN,GNA14,SLC9A3R1,NOM1,GNAI1,MTOR,GNAI2,PDGFRB,GNA11,INSR,CBL,HLA-DRB1,HLA-DPA1,GNAQ,ANXA6,INPP5D,PLCD3,SHB,ACTB,GAB2,VAV2,PLCD1,KPNB1,ERLIN2,NCK1,EGFR,FGF1,DNM2	1.51706	0.397216	31	96
GLUTARYL-COA DEGRADATION	GLUTARYL-COA DEGRADATION	0.00626204	0.0431186	-1	ENO3,EIF1,NEDD8,SHMT1,GPI,PSMD14,KARS,LNX1,LCP1,OLA1,PGD,ACAT1,NPEPPS,ALDOA,FDPS,ALDH2,ACSS2,ASL,COPS5,EIF4A1,AKR1D1,PFKM,PFAS,CNBP,BCAT2,GOT1,ATG5,EIF5A2,SUMO2,EIF3I,HSPA1B,CNDP2,USP10,PABPC4,FH,EEF2,OTUB1,PYGM,PPA2,EIF4A2,PPA1,ACAT2,MDH2,ABCE1,GALK2	-1.39709	-0.324671	45	181
GLYCINE CLEAVAGE	GLYCINE CLEAVAGE	0.00699301	0.0468143	-1	ENO3,IDH2,NEDD8,SHMT1,PFDN4,MAP2K2,PSMD14,IMPDH1,RPS18,NPEPPS,TPT1,ALDOA,PFDN5,FDPS,PSMC2,DNAJA1,ASB15,PDK4,BCKDHB,ATP5C1,TXNRD2,ATP5A1,PRDX5,GOT1,SUMO2,TYMP,CSE1L,HSPA1B,PEBP1,ACAA2,PGAM2,NDUFAB1,PITRM1,GCSH,EEF2,OTUB1,PYGM,TPI1,IMPDH2,MDH2,EIF2S3,EEF1A2,BTF3,RPS24,ATP6V1E1,BCKDHA,CUL2,GART,EEF1B2,UQCRC1,UCHL3,PRKACG,RPSA,STIP1,PRDX3,NME1,PTER,PPM1K	-1.37795	-0.318984	58	187
ESTROGEN BIOSYNTHESIS	ESTROGEN BIOSYNTHESIS	0.00786301	0.0512158	1	HSPA2,SDC2,PIGN,FMO3,SACM1L,CYP2S1,DBNL,MLH1,SEPT5,HACD2,CYB5R3,YIPF5,CORO1C,SEPT2,CYB5R2,SMAD2,FMO4,BCAP31,ARFGEF2,ACTR3,EIF2B5,CORO1B,PSEN1,TECR,CORO6,APOE,HSPA4,VDAC1,SEPT7,PGRMC2,SCD5,HSPB2,VDAC2	1.46142	0.362642	33	140
GDP-MANNOSE BIOSYNTHESIS	GDP-MANNOSE BIOSYNTHESIS	0.0120744	0.0747164	-1	IDH2,TP53RK,GPI,IDH1,PSMD14,HMGCR,STXBP2,GPN1,HIST1H2AD,H2AFX,PPME1,MCM4,PGD,CDK2,WDR36,NPEPPS,PSMC2,ALDH2,DNAJA1,ASB15,COPS5,EIF4A1,HIST3H2A,NIP7,CNBP,PSMB2,PSMD7,NCBP2,STK38,SUMO2,TUBB2B,HSPA1B,USP10,MDN1,CCT4,RUVBL2,NEDD4L,EEF2,EIF4A2,MDH2,EEF1A2,GNL2,GTF2H2C,NEDD4	-1.3551	-0.315556	44	179
NADH REPAIR	NADH REPAIR	0.012091	0.0747164	-1	COPS2,POLR2G,TCEB2,COPS8,SNRPG,NELFCD,PAPOLA,TIA1,CDK2,CSTF1,MAGOH,COPS5,ENO1,NCBP2,SNRPD3,POLR2H,NTMT1,CSE1L,PPWD1,NOTCH1,SNRPF,TXNL4A,COPS6,NEDD4L,CCAR1,SF3A2,CUL4B,USP7,CTNNBL1,NEDD4,SRSF11,GPS1,GPKOW,POLR2J,SNRPE,CTR9,FIP1L1,SRSF3,RTF1,TCEB1,HNRNPD,RBX1,OSGEP,NXF1,EP300,RPA3,CTCF,DHX38,WDR5,SNRPN,CPSF7,HNRNPH1,HNRNPH2,LEO1,SNW1,TAF8,PABPN1,GTF2F1,HNRNPF,UBQLN1,NCBP1,XPOT,PRPF31	-1.38057	-0.326798	63	155
PENTOSE PHOSPHATE PATHWAY (NON-OXIDATIVE BRANCH)	PENTOSE PHOSPHATE PATHWAY (NON-OXIDATIVE BRANCH)	0.0130403	0.078568	-1	HINT1,NEDD8,PFDN4,PSMD14,NOVA2,LNX1,H2AFX,PPME1,LCP1,PGD,CDK2,NPEPPS,ALDOA,RGN,DNAJA1,ACSS2,COPS5,TXNRD2,PFDN6,CNBP,ENO1,TXN2,ATG5,SUMO2,TNPO3,NTMT1,TALDO1,GORASP2,HSPA1B,USP10,NIF3L1,ACAA2,ATPAF2,NEDD4L,AKR1B1,MDH2,EIF2S3,PRPF40A,TBCA,SQSTM1,NEDD4,VTA1,GART,CALR,UCHL3,ARHGDIB,PCNA,YWHAZ,ARHGDIA,STIP1,NME1,HARS,NXF1,WDYHV1,PPP2R1A,EXOSC10	-1.34896	-0.314127	56	179
THYROID HORMONE METABOLISM II (VIA CONJUGATION AND/OR DEGRADATION)	THYROID HORMONE METABOLISM II (VIA CONJUGATION AND/OR DEGRADATION)	0.0140263	0.082447	1	SDC2,RAP2B,AGRN,HSPG2,BGN,NCOR2,VCAN,CAV1,FMOD,OGN,EXT2,PRELP,LUM,DCN,TRAPPC3,SMAD2,NCOA2,CREBBP,OMD,SULT1A1,APP,RHOA,HSPA4,ACTB,VAMP7,ARRB1,BAG1,PRKD2,EGFR,MTA1,RBL2,PKN2,TRAPPC9,UGDH,NCOA1,GPC1,ACAN,HARS2,CSPG4,RELA	1.46609	0.3896	40	87
3-PHOSPHOINOSITIDE DEGRADATION	3-PHOSPHOINOSITIDE DEGRADATION	0.0173671	0.0996543	1	INPP4B,CTTN,ABI1,SLC9A3R1,RAB31,DBN1,PDGFRB,HIP1,CSNK2A2,DNM1,INSR,CBL,ROCK1,CAMK2A,VAMP3,ACTR3,PTPN11,INPP5D,RHOA,AMPH,SORBS3,ACTR2,GAB2,SORBS1,INPP4A,RAB14,RAB8A,AAK1,SORBS2,DLG1,VAMP7,CSNK2A1,RAB6A,ARRB1,REPS2,EGFR,RHOG,AP2A2,DNM2,PTK2,MAST3,PLCG1,PICALM,WASL,XIAP,BIN1,APOB,ARPC5,INPPL1,GOLGA5,USP13,GRB2	1.38011	0.341345	52	144
3-PHOSPHOINOSITIDE BIOSYNTHESIS	3-PHOSPHOINOSITIDE BIOSYNTHESIS	0.0208184	0.11668	1	ITGB4,FYN,GNA14,CDIPT,HBEGF,PI4KA,FARP2,PDGFRB,GNA11,TLN1,CBL,PI4K2A,GNAQ,VAMP3,PIK3C2B,PTPN11,PIP5K1C,FIG4,AMPH,FCHO2,GAB2,AAK1,ERLIN2,VAMP7,ARRB1,REPS2,EGFR,RHOG,FGF1,AP2A2,PICALM,BIN1,APOB	1.39559	0.360029	33	107
VALINE DEGRADATION I	VALINE DEGRADATION I	0.0213942	0.117182	-1	ENO3,SERPINA1,STAT3,BTD,GPI,PSMD14,PTGES3,KARS,H2AFX,LCP1,ACAT1,NPEPPS,ALDOA,GLUL,FDPS,PSMC2,ALDH2,ACSS2,PARK7,AKR1D1,PFKM,PFAS,BCAT2,ATG5,SUMO2,CSE1L,MAPK14,ECHS1,HSPA1B,NOTCH1,PGAM2,ADI1,EEF1D,PAK2,EEF2,HIBADH,TRIM63,PYGM	-1.31102	-0.306043	38	174
CYSTEINE BIOSYNTHESIS/HOMOCYSTEINE DEGRADATION	CYSTEINE BIOSYNTHESIS/HOMOCYSTEINE DEGRADATION	0.0234073	0.125359	-1	ENO3,C12ORF10,NEDD8,SEC23B,PFDN4,PSMD14,ZDHHC17,PSMA1,PGD,CDK2,ACAT1,PFDN5,FDPS,VBP1,ALDH2,DNAJA1,BRIX1,EIF4A1,AKR1D1,NIP7,PFAS,ENO1,BCAT2,SUMO2,NTMT1,TUBB2B,ZNF622,CSE1L,HSPA1B,MDN1,PITRM1,OTUB1,RPLP2,NOP2,KATNB1,EIF4A2,ACAT2,MDH2,EEF1A2,GNL2,MRTO4	-1.30887	-0.305211	41	177
TREHALOSE DEGRADATION II (TREHALASE)	TREHALOSE DEGRADATION II (TREHALASE)	0.0252768	0.131478	-1	NUP43,MAP2K2,PSMD14,PPP1CC,PGD,CDK2,NPEPPS,PSMC2,HMGCS2,DNAJA1,PPP1CA,ATP5C1,PPP2CB,EIF4A1,AKR1D1,PFKFB1,TXN,BCAT2,PSMD7,GOT1,TALDO1,CSE1L,GSK3A,HSPA1B,CCT2,NUTF2,PGAM2,PABPC4,NAGK,PPIL3,NUP155,MDH2,EIF2S3,PSMC1,EEF1A2,GALK2,ETF1,ATP6V1E1,SARS,DSTN,C4ORF27,CCS,EIF5A,PRKACG,PCNA,RPS21,AKR1C1,NUP50,ST13,AARS,ACTC1,PSMC5,LONP1,UEVLD,SUCLG1,YWHAE,RPLP0,GARS,IARS,HSP90AB1,NUP160,DCPS,GDI2,HSP90AA1,EIF…	-1.2965	-0.301071	72	182
UDP-<IN</I-ACETYL-D-GALACTOSAMINE BIOSYNTHESIS II	UDP-<IN</I-ACETYL-D-GALACTOSAMINE BIOSYNTHESIS II	0.025641	0.131478	-1	PSMA4,NUP43,NEDD8,GPD1L,GPI,RPS13,PSMD14,HMGCR,STXBP2,HIST1H2AD,H2AFX,PPP1CC,PPME1,CDK2,NPEPPS,ASB15,PPP1CA,GPD1,HIST3H2A,PFKFB1,CNBP,RABGGTB,NCBP2,SUMO2,CSE1L,HSPA1B,USP10,PSMA3,GSPT1,PAK2,NAGK,NEDD4L,CYTH1,NUP155,KATNB1,ALG12,RPS3,SQSTM1,NEDD4,AP1G2,PGM3,SPRYD4,PRKACG,TIMM8B,PCNA,GK2	-1.31278	-0.30794	46	167
DERMATAN SULFATE DEGRADATION (METAZOA)	DERMATAN SULFATE DEGRADATION (METAZOA)	0.0272533	0.136834	1	ANK1,TUBB8,FYN,ENTPD5,VCAN,HBEGF,SMC6,FHL3,EXT2,SLC9A1,LOXL2,COL14A1,NDE1,PDIA5,ROCK1,CD44,TUBB4B,USP22,SLC2A4,AKAP9,CCND2,TUBB,PLXNA2,DYNC1H1,ACTB,BAG6,TUBA1A,EGFR,POMGNT2,CLASP1,TUBA4A,APOB,CSNK1E,BACH1,CKAP5,MAPK1	1.36486	0.347777	36	116
ANANDAMIDE DEGRADATION	ANANDAMIDE DEGRADATION	0.0288133	0.141714	1	POLR2I,ITGA1,ITGB5,SNCA,MYL6B,MYH11,CALD1,POLR2B,GNA11,TLN1,SMAD2,CD44,PXN,S1PR1,ITGB1,CREBBP,PTPN11,CCND2,APP,VCL,MME,SHB,SORBS3,SORBS1,MYL6,ILK,CSNK2A1,EGFR,STK16,PTK2,ELMO2,DOCK1,ACTA2,TPM3,MYL12A,TPM4,MAPK1,LMOD1,GRB2	1.38372	0.367309	39	88
MINERALOCORTICOID BIOSYNTHESIS	MINERALOCORTICOID BIOSYNTHESIS	0.0318903	0.153711	1	IGF1R,SDC2,FMO3,TUBB8,FYN,TM7SF2,CYP2S1,DBNL,CDIPT,OSBPL10,GATM,GPX8,CYB5R3,TUBB1,CYB5R2,SMAD2,FMO4,BCAP31,CREBBP,PSEN1,TUBB,APOE,HSPA4,RNF40,PGRMC2,NCK1,SCD5,HSPB2,SURF4,PEMT,RBL2	1.34339	0.34063	31	121
THREONINE DEGRADATION II	THREONINE DEGRADATION II	0.0378952	0.179074	-1	DERL1,COPS2,NEDD8,TCEB2,NDUFS7,NDUFA12,NAE1,TUFM,COPS5,COPS4,NUB1,GCAT,NDUFA10,NDUFB7,UBE2M,NDUFA6,COPS6,NDUFAB1,SENP8,NDUFV2,NDUFB3,NDUFA5,CUL4B,COPS3,EEF1A2,TMEM126B,UBA3,MRPL4,CUL2,MTIF3,ECSIT,NDUFB9,NDUFS3,UCHL3,MRPS6,NDUFA11,TCEB1,MT-ND1,RBX1,DCUN1D1,NDUFA9,MRPS21,LONP1,RNF19A,NDUFS6,NDUFS1,MRPS33,NDUFS8,NDUFS4,NDUFB6,MRPS16,FBXO6,NDUFC2,NDUFS2,NDUFAF5,RBBP6,TRIM21,CUL1,NDUFV1,NDUFB8,FBXO40,…	-1.25266	-0.287955	62	198
L-CYSTEINE DEGRADATION II	L-CYSTEINE DEGRADATION II	0.0390794	0.181118	-1	ENO3,C12ORF10,SEC23B,GPI,KARS,LCP1,OLA1,PGD,ACAT1,NPEPPS,FDPS,ALDH2,PPP1CA,ACSS2,EIF4A1,HIST3H2A,AKR1D1,PFKM,PFAS,ATP5A1,CNBP,BCAT2,ATG5,EIF5A2,SUMO2,TUBB2B,CSE1L,HSPA1B,USP10,CCT2,PABPC4,PPP2R2D,EEF2,PYGM,PPA2,RRM2B,EIF4A2,PPA1,ACAT2,MDH2,PSMC1,EEF1A2,GALK2	-1.25839	-0.291709	43	184
ARGININE DEGRADATION I (ARGINASE PATHWAY)	ARGININE DEGRADATION I (ARGINASE PATHWAY)	0.0498555	0.226701	-1	ENO3,KIAA0556,EIF1,IDH2,EIF4E,OTUD4,NEDD8,SHMT1,GPI,PSMD14,CPT2,IMPDH1,CDK2,ACAT1,TPT1,FDPS,PFDN2,PSMC2,ALDH2,DNAJA1,ASL,ATP5C1,GPD1,PFKM,ATP5A1,PRDX5,ATG101,GOT1,EIF5A2,SUMO2,TUBB2B,HSPA1B,USP10,PGAM2,FH,OTUB1,PYGM,PPA2,PPA1,IMPDH2,MDH2,EIF2S3,EEF1A2,BTF3,ATP6V1E1,SARS,GART,UCHL5,EIF5A,LARS,PRKACG,RPSA	-1.22919	-0.282638	52	197
SUPEROXIDE RADICALS DEGRADATION	SUPEROXIDE RADICALS DEGRADATION	0.05172	0.230825	-1	AKAP8L,HINT1,PSMD14,H2AFX,PSMA1,ALDOA,DYNLT1,RGN,DNAJA1,PARK7,TXNRD2,TXN,SSBP1,ENO1,TXN2,GOT1,SUMO2,NTMT1,CSE1L,HSPA1B,NUTF2,EEF1D,FH,PAK2,NEDD4L,FOXO3,AKR1B1,MDH2,HDAC6,SQSTM1,HSCB,NEDD4,CALR,CCS,EIF5A,UCHL3,HNRNPAB,PCNA,RPS21,APRT,NME1,HNRNPD,CRYAB,KEAP1,PPP2R1A,RNF19A,PKM,DYNC1LI1	-1.25219	-0.297854	48	150
RETINOATE BIOSYNTHESIS I	RETINOATE BIOSYNTHESIS I	0.0552606	0.238857	-1	ENO3,EIF4E,SHMT1,GPI,PSMD14,IMPDH1,HIST1H2AD,LCP1,PGD,ACAT1,NPEPPS,TPT1,FDPS,ALDH2,DNAJA1,ACSS2,ASL,EIF4A1,GPD1,PFKM,ATP5A1,CNBP,RABGGTB,PRDX5,ENO1,GOT1,SUMO2,TUBB2B,UBE2D4,CSE1L,HSPA1B,USP10,CCT2,PGAM2,GALT,FH,RUVBL2,EEF2,EIF2S1,PYGM,ATP6V0D1,EIF4A2,IMPDH2,EEF1A2	-1.22312	-0.281615	44	195
TRNA SPLICING	TRNA SPLICING	0.0555019	0.238857	-1	PPIL1,CD2BP2,POLR2G,HAT1,SNRPG,PAPOLA,H2AFV,CSTF1,SNRPB2,MAGOH,HIST3H2A,PPIH,NCBP2,CDC40,SNRPD3,EDC3,POLR2H,SNRPA1,PPWD1,SNRPF,TXNL4A,NUDT21,PABPC4,DHX15,CCAR1,SF3A2,LSM4,TFIP11,PRPF40A,LSM2,CTNNBL1,NEDD4,SRSF11,CHD1,LSM7,GPKOW,POLR2J,SNRPE,FIP1L1,SRSF3,HNRNPD,FBL,DNAJC8,DHX38,SNRPC,SNRPN,CPSF7,HNRNPH1,HNRNPH2,ISY1,SNW1,PABPN1,SNRPA,GTF2F1,HNRNPF,PQBP1,NCBP1,PRPF31,SRSF6,SRSF5,POLR2A,RBM5,HNRNPA1…	-1.23435	-0.287835	77	177
GLYCOGEN DEGRADATION II	GLYCOGEN DEGRADATION II	0.0608108	0.257112	-1	FKBP5,S100B,ENO3,CLASP2,RPS6KA1,IDH2,ATP6V1D,GBAS,NEDD8,SKI,PSMD14,PGD,CDK2,NPEPPS,ALDOA,PPP2CA,PPP1CA,EIF4A1,TRIM54,GPD1,AKR1D1,AKAP8,IGBP1,SUMO2,CSE1L,HSPA1B,USP10,CCT2,PGAM2,CCT4,NEDD4L,TRIM63,EIF2S1,PYGM,MDH2,EIF2S3,PRPF40A,CAP2	-1.2244	-0.285514	38	177
GALACTOSE DEGRADATION I (LELOIR PATHWAY)	GALACTOSE DEGRADATION I (LELOIR PATHWAY)	0.0639016	0.265522	-1	ENO3,OTUD4,NEDD8,PSMB6,PGD,PSMB3,NPEPPS,PPP2CA,DDX47,DNAJA1,BRIX1,ATP5C1,TUFM,PPP2CB,EIF4A1,PFKM,ATP5A1,PSMB2,STK38,SUMO2,EIF3I,TUBB2B,TALDO1,CSE1L,HSPA1B,PSMA3,CCT2,PGAM2,GALK1,PABPC4,GALT,CCT4,PPP2R2D,EEF2,PYGM,PPA2,ATP6V0D1,RRM2B,EIF4A2,PPA1,MDH2,EEF1A2,USP7,GNL2,GALK2	-1.21546	-0.281368	45	187
4-HYDROXYPROLINE DEGRADATION I	4-HYDROXYPROLINE DEGRADATION I	0.0690009	0.281851	1	FBXW11,MYO1D,DPYSL3,AGO2,CADPS,HBEGF,KLKB1,SLC25A6,GYS1,SNCA,LMNB1,TMPO,TUBB1,STX3,DNM1,VIM,WBSCR16,STX1A,MYO1C,MBP,PTPN23,ISCU,TUBB4B,NFS1,CSNK1A1,AGO1,NSF,TUBB,RHOA,DPYSL2,HSPA4,GPNMB,DYNC1H1,ACTB,VDAC1,TUBA1A,MYL6,PRKDC,ACIN1,LMNA,RAB5B,EGFR,ACTG1,SLC25A5,AP2A2,DNM2,YWHAQ,YWHAH,ACTA2,TPM3,TUBA4A,EEF1A1,CSNK1E,MIPEP	1.2279	0.293549	54	187
ANDROGEN BIOSYNTHESIS	ANDROGEN BIOSYNTHESIS	0.070373	0.282665	1	HSPA2,IGF1R,PIGN,SACM1L,RRAS,CYP2S1,MLH1,SEPT5,HACD2,PYGB,YIPF5,CORO1C,SEPT2,SMAD2,HIST1H1E,ARFGEF2,ACTR3,EIF2B5,CORO1B,TECR,CORO6,ACTB,VDAC1,SEPT7,HLA-C,SCD5,PDIA3,VDAC2	1.25022	0.313193	28	131
PROSTANOID BIOSYNTHESIS	PROSTANOID BIOSYNTHESIS	0.0725462	0.285527	-1	FKBP5,HINT1,DERL1,HK3,PTGES3,H2AFX,LCP1,CDK2,ALDOA,RGN,COPS5,BCR,BCAT2,ECH1,SUMO2,ECHS1,HSPA1B,COQ9,CELF2,EIF2AK2,EEF1D,OTUB1,NQO1,AKR1B1,COPS3,HDAC6,NDUFA4,ABCE1,SUCLG2,SARS,CALR,COPG2,STIP1,NME1,HNRNPD,RBX1,EP300,PSMC5,ERBB2,PRKCE,SIL1,EXOSC10,PSMD1,CALU,RPLP0,COPS7A,FBXO6,CASP7,SP1,GSTO1,HSP90AB1,CUL1,UBQLN1,MSN,FKBP4,HSP90AA1,POLR3A,NME2,HMGB1,HLA-B	-1.21789	-0.28829	60	155
CERAMIDE BIOSYNTHESIS	CERAMIDE BIOSYNTHESIS	0.0734552	0.285527	1	HSPA2,MRM1,ATP2A3,DMD,TUBB8,SACM1L,RRAS,CANX,TMEM30A,KDSR,TUBB1,CDK4,PYGB,HIST1H1E,SLC2A1,TUBB4B,SCRIB,TUBB,TECR,HSPA4,RALB,TOP1,KIF3B,TUBA8,TUBA1A,HLA-C,VAMP7,SEC63,RAB5B,EGFR,WBP11,VDAC2,SURF4,LAMC1,CLUH,C12ORF4,PRKCSH,TUBA4A,EEF1A1,SPTLC1,C20ORF24,HSD17B12	1.23502	0.304559	42	148
2-OXOGLUTARATE DECARBOXYLATION TO SUCCINYL-COA	2-OXOGLUTARATE DECARBOXYLATION TO SUCCINYL-COA	0.0748136	0.286192	-1	ENO3,GLUD2,NEDD8,PFN2,PSMD14,RPS18,NPEPPS,TPT1,ALDOA,ZBTB16,PFDN5,FDPS,ASB15,PDK4,BCKDHB,GPD1,TXNRD2,CNBP,RPS7,ENO1,GOT1,SUMO2,HSPA1B,PEBP1,ACAA2,RPS4X,PGAM2,PITRM1,GCSH,EEF2,PRUNE,RPS17,OTUB1,PYGM,FAHD1,IMPDH2,EEF1A2,RPS3,RPS24,BCKDHA	-1.20785	-0.279931	40	185
2-OXOISOVALERATE DECARBOXYLATION TO ISOBUTANOYL-COA	2-OXOISOVALERATE DECARBOXYLATION TO ISOBUTANOYL-COA	0.0794415	0.299147	-1	ENO3,BOLA1,NEDD8,PSMD14,IMPDH1,RPS18,NPEPPS,TPT1,ALDOA,PFDN5,FDPS,ASB15,PDK4,BCKDHB,COQ6,TXNRD2,ATP5A1,PRDX5,GOT1,HSPA1B,PEBP1,ACAA2,PGAM2,PPT1,PITRM1,ADI1,GCSH,PTEN,EEF2,OTUB1,PYGM,SH3KBP1,IMPDH2,FNBP1,HDAC6,EEF1A2,BTF3,RPS24,BCKDHA,GART,EEF1B2,NDUFS3,UCHL3,SPRYD4,PRKACG,USP16,PRDX3,NME1	-1.19811	-0.278224	48	182
HISTAMINE BIOSYNTHESIS	HISTAMINE BIOSYNTHESIS	0.0904828	0.335482	1	CTTN,ABHD16A,NOTCH2,CABIN1,FLOT2,HIP1,STAM,SPG21,DNM1,CD74,SYNM,CBL,HLA-DRB1,PI4K2A,PTPN23,CREBBP,HLA-DPA1,VAMP3,HGS,ACTR3,PSEN1,APP,AMPH,FCHO2,HSPA4,ACTR2,AAK1,SORBS2,VAMP7,ARRB1,REPS2,LMNA,EGFR,ACTG1,AP2A2,DNM2,YWHAQ,PTK2,MTA1,RBL2,PICALM,WASL,BIN1,APOB,ARPC5,MAPK1,HTT,GRB2,EIF4ENIF1,HMGB2,HIST1H1A,PHF2,CLTC	1.21411	0.298073	53	153
PHOSPHOLIPASES	PHOSPHOLIPASES	0.0969187	0.352882	1	TGM2,PLCB4,GNAO1,FYN,GNA14,SLC9A3R1,GNAI1,GNAI2,PDGFRB,GNA11,INSR,CBL,HLA-DRB1,HLA-DPA1,GNAQ,INPP5D,PLCD3,ACTB,VAV2,PLCD1,ERLIN2,NCK1,EGFR,FGF1,DNM2,PLCG1,EEF1A1,PLCG2,MAPK1,HLA-E,GRB2	1.24143	0.326398	31	94
THIO-MOLYBDENUM COFACTOR BIOSYNTHESIS	THIO-MOLYBDENUM COFACTOR BIOSYNTHESIS	0.098104	0.352882	1	UNG,HBB,HBA1,ACTN1,SDC2,DMD,CD46,TCF4,RRAS,AGRN,HSPG2,SLC25A6,GYS1,PLS3,MYL6B,HIST1H1B,CDK4,PYGB,APOA4,GJA1,HLA-DRB1,CD44,PXN,PFKL,HIST1H1E,SLC2A1,STMN1,SLC2A4,APOE,RALB,TOP1,ATP1A3,HLA-C,ILK	1.19854	0.293166	34	157
ARGININE BIOSYNTHESIS IV	ARGININE BIOSYNTHESIS IV	0.10086	0.357461	-1	ORM1,ENO3,GLUD2,KIAA0556,EIF4E,OTUD4,ARAF,NEDD8,GPI,PSMD14,ATP5H,CDK2,CRP,ALDOA,PFDN2,ALDH2,DNAJA1,ASL,PSMA6,ATP5C1,GPD1,PFKM,AKTIP,SUMO2,CSE1L,HSPA1B,QARS,USP10,PTPN1,GALT,FH,OTUB1,PYGM,NOP2	-1.18497	-0.278707	34	164
UREA CYCLE	UREA CYCLE	0.103217	0.36051	-1	ENO3,EIF4E,ARAF,NEDD8,SHMT1,GPI,PSMD14,CPT2,HIST1H2AD,H2AFX,MCM4,CDK2,ACAT1,TPT1,ALDH2,DNAJA1,ASL,PSMA6,ATP5C1,GPD1,PFKM,AKTIP,ATP5A1,PRDX5,ATG101,SUMO2,TUBB2B,CSE1L,HSPA1B,QARS,PGAM2,PTPN1,GALT,FH,EEF2,PYGM,NOP2	-1.17511	-0.274989	37	172
CHONDROITIN SULFATE DEGRADATION (METAZOA)	CHONDROITIN SULFATE DEGRADATION (METAZOA)	0.107763	0.371013	1	ANK1,FYN,IGFBP3,ISLR,VCAN,HBEGF,SMC6,FHL3,SLC9A1,COL14A1,NDE1,ROCK1,CD44,TUBB4B,USP22,ACTR3,SLC2A4,AKAP9,CCND2,TUBB,PLXNA2,DYNC1H1,ACTB,ACTR2,VAV2,BAG6,TUBA1A,ARRB1,NAAA,EGFR,CLASP1,WASL,TUBA4A,APOB,CSNK1E,BACH1,CKAP5,MAPK1,GRB2,SUMO3,SUMF2,PRKAR2B,NUP214	1.20861	0.305127	43	125
CDP-DIACYLGLYCEROL BIOSYNTHESIS I	CDP-DIACYLGLYCEROL BIOSYNTHESIS I	0.121176	0.40866	-1	ENO3,ABHD5,ATP6V1D,GPI,GPN1,PLIN1,CDK2,PSMA7,RUVBL1,PSMC2,DDX47,SIRT2,SSBP1,PSMB2,RPS7,ECH1,EPRS,TUBB2B,CSE1L,HSPA1B,CNDP2,RPS4X,ATP2A2,COQ9,PNPLA2,MDN1,PABPC4,CCT4,FH,RUVBL2,GMPS,NDUFA4,EEF1A2,CAP2,CLN5	-1.16522	-0.274062	35	164
GLUCOCORTICOID BIOSYNTHESIS	GLUCOCORTICOID BIOSYNTHESIS	0.124597	0.40866	1	IGF1R,FMO3,FYN,TM7SF2,CYP2S1,CDIPT,CAV1,IGF2,OSBPL10,GPX8,CYB5R3,CYB5R2,FMO4,BCAP31,CREBBP,PSEN1,APOE,HSPA4,RNF40,PPP2R3B,PGRMC2,NCK1,SCD5,HSPB2	1.19754	0.306832	24	113
CITRULLINE-NITRIC OXIDE CYCLE	CITRULLINE-NITRIC OXIDE CYCLE	0.12506	0.40866	-1	FASN,PSMA4,NOSIP,ARAF,TCEB2,ADRM1,PSMD14,PTGES3,PSMA1,CDK2,RPS18,PTPN6,PSMA7,PSMC2,PSMB7,DNAJA1,ASL,PSMA6,NOSTRIN,PFKM,SSBP1,PSMA2,PSMD7,SNRPD3,C1QBP,LYPLA1,SUMO2,PPP6C,NOS1AP,PICK1,PSMA3,RPS4X,CCT2,ATP2A2,CCT4,RUVBL2,RPS17,STRAP	-1.1529	-0.266724	38	188
D-MANNOSE DEGRADATION	D-MANNOSE DEGRADATION	0.125481	0.40866	-1	ENO3,EIF4E,GPI,SKI,PSMD14,KARS,LCP1,OLA1,PGD,ACAT1,NPEPPS,TPT1,FDPS,ADH5,ALDH2,PEPD,ACSS2,ATP5C1,EIF4A1,AKR1D1,PFKM,PFAS,TXN,BCR,BCAT2,EIF5A2,SUMO2,HSPA1B,PTPN1,PABPC4,RUVBL2,NEDD4L,EEF2,PYGM,PPA2,EIF4A2,PPA1,ACAT2,IMPDH2,MDH2,EEF1A2,GALK2,APEH,NEDD4,ASS1,SARS	-1.15888	-0.270527	46	174
PHENYLETHYLAMINE DEGRADATION I	PHENYLETHYLAMINE DEGRADATION I	0.130172	0.41268	1	MID1,HSPA2,TGM2,FBXW11,AOC3,DMD,AGO2,CAV1,ITPR1,SNCA,MTOR,HIP1,STX3,VIM,SHMT2,BCAP31,TUBB4B,CREBBP,RAB10,AGO1,GNAQ,VAMP3,VAT1,TUBB,AHNAK,GANAB,HSPA4,DYNC1H1,LMAN2,TUBA1A,STX12,STX7,BAG1,GABARAPL2,MOV10,EGFR,EPM2A,PDIA3,AP2A2,TTN,ANXA11,TPM3	1.16697	0.283381	42	165
ADENINE AND ADENOSINE SALVAGE VI	ADENINE AND ADENOSINE SALVAGE VI	0.130864	0.41268	-1	ENO3,GPI,SKI,PSMD14,KARS,GPN1,LCP1,OLA1,PGD,ACAT1,NPEPPS,RUVBL1,FDPS,ADH5,ALDH2,DNAJA1,ACSS2,ATP5C1,EIF4A1,AKR1D1,PFKM,PFAS,TXN,BCR,BCAT2,EIF5A2,SUMO2,PPP6C,TUBB2B,HSPA1B,PABPC4,GALT,EEF2,PYGM,PPA2,RRM2B,EIF4A2,PPA1,ACAT2,IMPDH2,MDH2	-1.14888	-0.266265	41	185
CITRULLINE BIOSYNTHESIS	CITRULLINE BIOSYNTHESIS	0.131852	0.41268	-1	ENO3,KIAA0556,EIF4E,OTUD4,NEDD8,GPI,PSMD14,CPT2,HIST1H2AD,H2AFX,CDK2,ACAT1,TPT1,PFDN2,ALDH2,DNAJA1,PSMA6,ATP5C1,GPD1,PFKM,ATP5A1,PRDX5,ATG101,GRHPR,SUMO2,TUBB2B,HSPA1B,USP10,COQ9,PGAM2,GALT,FH,EEF2,OTUB1,PYGM	-1.14921	-0.267612	35	179
DOLICHOL AND DOLICHYL PHOSPHATE BIOSYNTHESIS	DOLICHOL AND DOLICHYL PHOSPHATE BIOSYNTHESIS	0.136473	0.421667	1	UNG,HSPA2,ACTN1,RTN4,DMD,TUBB8,CD46,TCF4,RRAS,CDIPT,SLC25A6,GYS1,PLS3,MYL6B,HIST1H1B,TUBB1,CDK4,PYGB,HLA-DRB1,CD44,HIST1H1E,SLC2A1,TUBB4B,HLA-DPA1,SLC2A4,TUBB,HSPA4,RALB,BPGM,ACTB,TOP1,TUBA8,TUBA1A,ATP1A3,HLA-C	1.16301	0.282388	35	164
CHOLINE DEGRADATION I	CHOLINE DEGRADATION I	0.141349	0.431203	-1	NUP43,UBE2V1,NDUFS7,UBE2N,HIST2H2BE,PRKCD,ATG16L1,HIST3H2A,NDUFA10,NDUFB7,UBE2V2,MFN1,NDUFA6,ATG5,SUMO2,MAPK14,TP53BP1,COQ9,CHDH,NDUFAB1,NDUFV2,EIF4A2,NDUFA5,PPA1,CUL4B,HDAC6,NDUFA4,EEF1A2,SQSTM1,NDUFB9,NDUFS3,EIF5A,EXOSC9,NDUFA11,MT-ND1,RBX1,NFKBIA,KEAP1,ACTC1,NDUFA9,EXOSC10,SESN1,NDUFS6,NDUFS1,NDUFS8,NDUFS4,PDCD11,NDUFB6,NDUFC2,NDUFS2,NUP160,TRIM21,UBQLN1,NDUFV1,NDUFB8,COX5B,KCNAB2,NUP37,NUP35,…	-1.14653	-0.267186	70	176
SALVAGE PATHWAYS OF PYRIMIDINE RIBONUCLEOTIDES	SALVAGE PATHWAYS OF PYRIMIDINE RIBONUCLEOTIDES	0.14469	0.435059	-1	CHCHD2,GOLPH3,UBE2V1,NEDD8,PFN2,LNX1,IFT27,PGD,PSMA7,TPT1,GLRX5,PFDN6,RPS16,UBE2V2,ECH1,GOT1,EIF5A2,POLR2H,SUMO2,NTMT1,TUBB2B,MAPK14,NIF3L1,NUTF2,PGAM2,PITRM1,RUVBL2,PTEN,EEF2,PRUNE,STRAP,OTUB1,ACP6,CAP2,PPP2R4,LACTB,POLDIP2,AMOTL2,NME7	-1.14421	-0.269794	39	160
SPERMINE AND SPERMIDINE DEGRADATION I	SPERMINE AND SPERMIDINE DEGRADATION I	0.146223	0.435059	-1	PPIL1,SEPHS1,ASB11,POLR2G,ASB2,NEDD8,TCEB2,SAT2,CCNT1,LNX1,NELFCD,HIF1AN,ASB15,DDX39A,EGLN1,POLR2H,NIF3L1,NOTCH1,COPS6,NAA10,GSTT2B,TFIP11,LSM2,NELFE,CUL2,LSM7,ASB8,POLR2J,CTR9,FUNDC2,RTF1,TCEB1,RBX1,USP19,EP300,UNC119,LEO1,NELFA,ISY1,CASP7,GTF2F1,HSP90AB1,HSP90AA1,EIF3D,PLGRKT,PRDX2,TACO1,ERCC3,POLR2A,SSRP1	-1.15154	-0.277092	50	136
TETRAHYDROBIOPTERIN BIOSYNTHESIS II	TETRAHYDROBIOPTERIN BIOSYNTHESIS II	0.155775	0.457827	-1	EIF4E,GPI,HIST2H2BE,AHSA1,LNX1,PGD,PSMB3,CDC37,PPP2CA,DDX47,ALDH2,DNAJA1,ATP5C1,PPP2CB,EIF4A1,PFKM,PSMB2,EIF5A2,EIF3I,NTMT1,TUBB2B,TALDO1,HSPA1B,MAP2K4,GALT,RUVBL2,PPA2,EIF4A2,TPI1,PPA1,GNPAT,EEF1A2,CAP2,GALK2,PPP2R5D,SARS,CUL2,DSTN,CCT7,SH3GL2,ALDH1A1,EIF5A,PPP2R5C,PRKACG,YWHAZ,APRT,STIP1,ATL2,WDYHV1,ACTC1,PSMC5	-1.13304	-0.263979	51	178
ZYMOSTEROL BIOSYNTHESIS	ZYMOSTEROL BIOSYNTHESIS	0.160532	0.466124	1	UNG,HSPA2,ACTN1,DMD,TUBB8,TM7SF2,RRAS,SLC25A6,TMEM30A,PLS3,TUBB1,CDK4,PYGB,CSNK2A2,MECP2,HLA-DRB1,CAMK2A,PXN,HIST1H1E,SLC2A1,TUBB4B,TUBB,RALB,ACTB,SRPK2,TOP1,TUBA1A,ATP1A3,HLA-C,CSNK2A1,LMNA,MOV10,HDAC2,ACTG1	1.14786	0.282396	34	150
FOLATE TRANSFORMATIONS I	FOLATE TRANSFORMATIONS I	0.16855	0.483578	-1	GLUD2,JMJD6,DECR1,MTHFR,NEDD8,C10ORF76,SHMT1,PSMD14,ZBTB8OS,PSMA1,RBM6,H2AFV,NPEPPS,PSMB2,CCDC58,BRE,CDK18,NT5C3B,GOT1,SUMO2,HSPA1B,PPHLN1,USP10,WDR81,EEF2,PRUNE,OTUB1,XRN2,PCID2,EEF1A2	-1.13225	-0.270411	30	145
FATTY ACID BIOSYNTHESIS INITIATION II	FATTY ACID BIOSYNTHESIS INITIATION II	0.171769	0.484708	-1	CLASP2,PKIA,NUP43,UBE2V1,COX6A2,UBE2N,H2AFX,PPP1CC,ATP5H,DNAJA1,BRE,UBE2V2,BCL10,SUMO2,TUBB2B,TP53BP1,NDUFAB1,ATP5J,OTUB1,NUP155,UBE2B,PAFAH1B1,CUL4B,NDUFA4,SQSTM1	-1.13363	-0.271875	25	140
2-AMINO-3-CARBOXYMUCONATE SEMIALDEHYDE DEGRADATION TO GLUTARYL-COA	2-AMINO-3-CARBOXYMUCONATE SEMIALDEHYDE DEGRADATION TO GLUTARYL-COA	0.172966	0.484708	1	HBEGF,GNAI1,SNCA,GNA11,NCOA2,MBP,S1PR1,CREBBP,GNAQ,VAMP3,PSEN1,APP,TUBB,GPNMB,TUBA1A,EGFR,YWHAQ,APLP2,YWHAH,CXCL12,MAPK1	1.19162	0.341146	21	57
GDP-GLUCOSE BIOSYNTHESIS	GDP-GLUCOSE BIOSYNTHESIS	0.175434	0.485041	-1	S100B,ENO3,NUP43,ATP6V1D,RARS2,PSMD14,KARS,PPP1CC,PGD,NPEPPS,ALDOA,PPP1CA,EIF4A1,HIST3H2A,AKR1D1,TRAPPC6B,PFKFB1,SUMO2,CSE1L,HSPA1B,USP10,CCT2,PABPC4,CCT4,NUP155,RRM2B,EIF4A2,PPA1,MDH2,EIF2S3,EEF1A2,CAP2,GALK2,CUL2,DSTN,EIF5A,PRKACG,PCNA,RPS6KA5,AKR1C1,NUP50,ATL2,AARS,ACTC1,PSMC5,PPP2R1A,CCT3,YWHAE,UGP2,GARS,IARS,HSP90AB1,NUP160,HSP90AA1,PRPF31,GMPPB,HSPA4L,NUP37,NUP35,ATP6V1A,ERCC3,NUP153,NUP85	-1.12133	-0.26148	63	177
GLYCEROL-3-PHOSPHATE SHUTTLE	GLYCEROL-3-PHOSPHATE SHUTTLE	0.17711	0.485041	-1	GLUD2,CALCOCO2,GPD1L,GPI,SKI,PSMD14,HIST1H2AD,H2AFX,NPEPPS,ALDOA,ADH5,ALDH2,PEPD,DNAJA1,GPD1,ART3,HIST3H2A,TXN,PRDX5,BCR,ENO1,ATP5O,EIF5A2,SUMO2,CSE1L,GSK3A,HSPA1B,GPD2,PGAM2,PAK2,ATP5J,PYGM,IMPDH2,MDH2	-1.12502	-0.266455	34	154
MELATONIN DEGRADATION I	MELATONIN DEGRADATION I	0.184349	0.499193	1	SDC2,FMO3,RAP2B,CYP2S1,DBNL,CYB5R3,NT5E,CYB5R2,FMO4,BCAP31,SULT1A1,PSEN1,APP,APOE,HSPA4,PGRMC2,VAMP7,ARRB1,EGFR,HSPB2,AMZ2,RBL2	1.16171	0.31369	22	80
<IS</I-METHYL-5-THIO-&ALPHA;-D-RIBOSE 1-PHOSPHATE DEGRADATION	<IS</I-METHYL-5-THIO-&ALPHA;-D-RIBOSE 1-PHOSPHATE DEGRADATION	0.187981	0.500057	-1	ENO3,MTHFD2,NANS,NEDD8,SKI,RPS13,EZR,LNX1,H2AFX,PPP1CC,LCP1,PSMA1,TPT1,VPS25,GLUL,FDPS,ADH5,PEPD,OSTF1,PFKFB1,TXN,CNBP,BCR,NUDT18,SUMO2,HSPA1B,NIF3L1,ATP2A2,PGAM2,GSPT1,ADI1,GCSH,EEF2,HIBADH,PYGM,NQO1,AKR1B1,IMPDH2,PPP2R4,APEH,UBA3,DENR,MRI1,ERH,CKB,UCHL3,PCNA,POR	-1.11322	-0.261151	48	169
DIPHTHAMIDE BIOSYNTHESIS	DIPHTHAMIDE BIOSYNTHESIS	0.188818	0.500057	1	UNG,HSPA2,ACTN1,DMD,CD46,TCF4,RRAS,SLC25A6,GYS1,SLC9A1,ITGB5,PLS3,LMNB1,MYL6B,HIST1H1B,CDK4,PYGB,ANXA7,CSNK2A2,GJA1,HLA-DRB1,CD44,PFKL,HIST1H1E,SLC2A1,STMN1,ATP2B1,SLC2A4,VCL,HK1,ERCC2,RALB,TOP1,ATP1A3,HLA-C,RAB6A	1.12326	0.271543	36	170
GLUTATHIONE REDOX REACTIONS II	GLUTATHIONE REDOX REACTIONS II	0.194925	0.51062	1	UNG,HSPA2,ACTN1,DMD,CD46,TCF4,RRAS,SLC25A6,GYS1,SLC9A1,ITGB5,PLS3,MYL6B,HIST1H1B,CDK4,PYGB,ATP6V1C1,CSNK2A2,PJA1,GJA1,HLA-DRB1,CD44,PFKL,HIST1H1E,SLC2A1,STMN1,ATP2B1,SLC2A4,VCL,HK1,ERCC2,RALB,TOP1,ATP1A3,HLA-C	1.12209	0.271701	35	168
PYRIDOXAL 5'-PHOSPHATE SALVAGE PATHWAY	PYRIDOXAL 5'-PHOSPHATE SALVAGE PATHWAY	0.198833	0.514372	1	UNG,HSPA2,ACTN1,DMD,TUBB8,CD46,TCF4,RRAS,PGM5,SLC25A6,GYS1,PLS3,MYL6B,HIST1H1B,TUBB1,CDK4,PYGB,MYO1C,HLA-DRB1,CD44,HIST1H1E,SLC2A1,CUL3,TUBB4B,CSNK1A1,SLC2A4,APP,TUBB,HK1,CAND1,HSPA4,RALB,DHRS11,ACTB,TOP1,ATP1A3,HLA-C,PRKAB1	1.11965	0.271344	38	167
<IN</I-ACETYLGLUCOSAMINE DEGRADATION I	<IN</I-ACETYLGLUCOSAMINE DEGRADATION I	0.201814	0.514372	1	UNG,ACTN1,THBS4,DMD,CD46,TCF4,COMP,RRAS,FCHSD2,SLC25A6,GYS1,ITGB5,PLS3,MYL6B,HIST1H1B,CDK4,PYGB,FGL2,GJA1,HLA-DRB1,CD44,PFKL,HIST1H1E,THBS3,SLC2A1,STMN1,SLC2A4,VCL,HK1,ERCC2,RALB,TOP1,ATP1A3,PRTFDC1,HLA-C	1.11289	0.268278	35	174
PROLINE BIOSYNTHESIS II (FROM ARGININE)	PROLINE BIOSYNTHESIS II (FROM ARGININE)	0.202761	0.514372	-1	ENO3,KIAA0556,EIF4E,OTUD4,NEDD8,GPI,PSMD14,HIST1H2AD,H2AFX,CDK2,ACAT1,TPT1,PFDN2,ALDH2,PSMA6,ATP5C1,PARK7,GPD1,PFKM,ATP5A1,CNBP,SUMO2,TUBB2B,HSPA1B,USP10,PGAM2,NUDT21,GALT,FH,EEF2,OTUB1,PYGM	-1.10372	-0.259279	32	165
GLUTATHIONE-MEDIATED DETOXIFICATION I	GLUTATHIONE-MEDIATED DETOXIFICATION I	0.208203	0.517289	-1	MGST1,NEDD8,PRDX6,GSTP1,AHSA1,PPP1CC,MCM4,NELFCD,CDK2,ZBTB16,GSTM2,DCXR,AGT,ENO1,GSTM4,ATG5,SUMO2,NTMT1,SNRPA1,TUBB2B,MAPK14,CCT2,COQ9,SH3GLB1,OGFR,PAK2,PTEN,OTUB1,GSTT2B,ADIPOQ,ST3GAL1,SMC2,ATP1A1	-1.10173	-0.258372	33	168
4-HYDROXY-2-NONENAL DETOXIFICATION	4-HYDROXY-2-NONENAL DETOXIFICATION	0.208203	0.517289	-1	MGST1,NEDD8,PRDX6,GSTP1,AHSA1,PPP1CC,MCM4,NELFCD,CDK2,ZBTB16,GSTM2,DCXR,AGT,ENO1,GSTM4,ATG5,SUMO2,NTMT1,SNRPA1,TUBB2B,MAPK14,CCT2,COQ9,SH3GLB1,OGFR,PAK2,PTEN,OTUB1,GSTT2B,ADIPOQ,ST3GAL1,SMC2,ATP1A1	-1.10173	-0.258372	33	168
NAD BIOSYNTHESIS III	NAD BIOSYNTHESIS III	0.2142	0.526757	1	UNG,IGF1R,ACTN1,FBXW11,DMD,CD46,TCF4,RRAS,SLC25A6,GYS1,SLC9A1,ITGB5,PLS3,MYL6B,HIST1H1B,CDK4,PYGB,CSNK2A2,INSR,GJA1,HLA-DRB1,CD44,PFKL,HIST1H1E,SLC2A1,STMN1,SLC2A4,VCL,HK1,DDA1,ERCC2,RALB,TOP1,ATP1A3,HLA-C	1.10885	0.268058	35	170
4-HYDROXYPHENYLPYRUVATE BIOSYNTHESIS	4-HYDROXYPHENYLPYRUVATE BIOSYNTHESIS	0.228558	0.546665	-1	STAT3,COPS2,SMARCD3,POLR2G,PCK2,NEDD8,SMARCE1,COPS8,PTGES3,CCNT1,CDK2,ACTL6A,DNAJA1,COPS5,COPS4,AARSD1,SMARCB1,TXN,TXN2,ACADVL,PSMD7,POLR2H,SUMO2,SMAD4,HSPA1B	-1.09797	-0.263322	25	140
4-HYDROXYBENZOATE BIOSYNTHESIS	4-HYDROXYBENZOATE BIOSYNTHESIS	0.228558	0.546665	-1	STAT3,COPS2,SMARCD3,POLR2G,PCK2,NEDD8,SMARCE1,COPS8,PTGES3,CCNT1,CDK2,ACTL6A,DNAJA1,COPS5,COPS4,AARSD1,SMARCB1,TXN,TXN2,ACADVL,PSMD7,POLR2H,SUMO2,SMAD4,HSPA1B	-1.09797	-0.263322	25	140
DTMP <IDE NOVO</I BIOSYNTHESIS	DTMP <IDE NOVO</I BIOSYNTHESIS	0.229749	0.546665	-1	GLUD2,JMJD6,DECR1,NEDD8,C10ORF76,SHMT1,PSMD14,ZBTB8OS,RBM6,H2AFV,NPEPPS,CNBP,PSMB2,CCDC58,BRE,NT5C3B,GOT1,SUMO2,CSE1L,HSPA1B,PPHLN1,USP10,FAM96B,WDR81,NEDD4L,EEF2,PRUNE,OTUB1,XRN2,PCID2,EEF1A2	-1.10079	-0.264419	31	138
MITOCHONDRIAL L-CARNITINE SHUTTLE PATHWAY	MITOCHONDRIAL L-CARNITINE SHUTTLE PATHWAY	0.232834	0.546665	-1	ENO3,CACYBP,MTHFD2,SKI,CPT2,EZR,H2AFX,LCP1,TPT1,GLUL,FDPS,C17ORF89,ADH5,PEPD,ACSS2,PFDN6,PFKFB1,SMARCB1,TXN,BCR,ENO1,PPP4C,SUMO2,HSPA1B,FAM96B,COQ9,PGAM2,GSPT1,EEF2,PYGM,ATP6V0D1,NQO1,FAHD1,AKR1B1,CPT1A,IMPDH2,HDAC6,NDUFA4,ADCK3,APEH,RIC8A,NDUFS3,CKB,UCHL3,PCNA,POR,NME1,HARS,NXF1,WDR5,PKM,XRCC5,CLIC1,MIF,RPS2,DARS,XRCC6,SLC25A4,BRAF,FBXO6,ATP5B	-1.09276	-0.257661	61	160
CMP-<IN</I-ACETYLNEURAMINATE BIOSYNTHESIS I (EUKARYOTES)	CMP-<IN</I-ACETYLNEURAMINATE BIOSYNTHESIS I (EUKARYOTES)	0.233637	0.546665	1	UNG,ACTN1,DMD,CD46,TCF4,RRAS,DBNL,SLC25A6,GYS1,ITGB5,MLH1,PLS3,MYL6B,HIST1H1B,CDK4,PYGB,GJA1,CDKN2AIP,HLA-DRB1,CD44,PFKL,HIST1H1E,SLC2A1,STMN1,SLC2A4,LIMS1,CEP170,APP,VCL,FIG4,ERCC2,RALB,TOP1,ATP1A3,HLA-C	1.09741	0.266145	35	166
SPERMIDINE BIOSYNTHESIS I	SPERMIDINE BIOSYNTHESIS I	0.239648	0.551075	-1	ENO3,MTHFD2,EIF4E,GPI,SKI,PSMD14,PPP1CC,LCP1,TPT1,FDPS,ADH5,ALDH2,PEPD,DNAJA1,PPP1CA,ATP5C1,EIF4A1,TXN,ATP5A1,BCR,ATP5O,SUMO2,TUBB2B,CSE1L,HSPA1B,QARS,USP10,COA7,PGAM2,EEF2,OTUB1,PYGM,PPA2,EIF4A2,PPA1,IMPDH2,EEF1A2,ABCE1,GALK2,APEH	-1.08725	-0.255409	40	165
GLYCOGEN BIOSYNTHESIS II (FROM UDP-D-GLUCOSE)	GLYCOGEN BIOSYNTHESIS II (FROM UDP-D-GLUCOSE)	0.240095	0.551075	-1	UBE2V1,NEDD8,PFDN4,PSMD14,NOVA2,PPP1CC,PGD,CDK2,VBP1,DNAJA1,PPP1CA,COPS5,SIRT2,GLRX3,CNBP,UBE2V2,SUMO2,CSE1L,GSK3A,MAPK14,HSPA1B,USP10,SH3GLB1,RUVBL2,NEDD4L,PRUNE,PYGM,NUP155,RRM2B,AIMP2,EEF1A2,PPP2R4,NEDD4,PPP1R7,MAPK13,GART	-1.09223	-0.259805	36	150
SPHINGOMYELIN METABOLISM	SPHINGOMYELIN METABOLISM	0.257033	0.581724	1	UNG,HSPA2,ACTN1,DMD,CD46,RRAS,ALDH3A2,SRPRB,SLC25A6,GYS1,TMEM30A,PLS3,MYL6B,TMPO,CDK4,PYGB,ANXA7,HLA-DRB1,ANXA4,HIST1H1E,SLC2A1,PLEKHM1,SLC2A4,PLVAP,HSPA4,RALB,TOP1,ATP1A3,KPNB1,HLA-C	1.09306	0.271235	30	140
OLEATE BIOSYNTHESIS II (ANIMALS)	OLEATE BIOSYNTHESIS II (ANIMALS)	0.258276	0.581724	1	UNG,HSPA2,ACTN1,ATP2A3,DMD,TUBB8,SACM1L,RRAS,SLC25A6,GYS1,PLS3,MYL6B,HACD2,TUBB1,CDK4,PYGB,HLA-DRB1,HIST1H1E,SLC2A1,TUBB4B,SLC2A4,APP,TUBB,TECR,HSPA4,RALB,TOP1,TUBA8,TUBA1A,ATP1A3,HLA-C	1.08421	0.263283	31	165
URATE BIOSYNTHESIS/INOSINE 5'-PHOSPHATE DEGRADATION	URATE BIOSYNTHESIS/INOSINE 5'-PHOSPHATE DEGRADATION	0.263966	0.584389	-1	ASB2,TP53RK,NEDD8,PSMD14,AHSA1,IMPDH1,GLMN,CDK2,TPRKB,HSPBP1,CNBP,ENO1,ATG5,ATP5O,NUDT18,SUMO2,NTMT1,HSPA1B,NOS1AP,RPS4X,COPS6,NDUFAB1,CCT4,NEDD4L,PPP2R2D,FOXO3,SH3KBP1,IMPDH2,ABCE1,NEDD4,NME7,UCHL5,COPG2,BMS1,NT5C1A,LYRM1,YWHAZ,PPP2R2A,NME1,NT5C3A,NXF1,WDYHV1,RPA3,SESN1	-1.08076	-0.259608	44	138
COENZYME A BIOSYNTHESIS	COENZYME A BIOSYNTHESIS	0.264449	0.584389	1	UNG,HSPA2,ACTN1,DMD,CD46,TCF4,RRAS,SLC25A6,GYS1,SLC9A1,ITGB5,SREK1IP1,PLS3,MYL6B,HIST1H1B,CDK4,PYGB,ANXA7,CSNK2A2,GJA1,HLA-DRB1,CD44,PFKL,HIST1H1E,SLC2A1,STMN1,ATP2B1,SLC2A4,VCL,HK1,ERCC2,RALB,TOP1,ATP1A3,HLA-C	1.08042	0.261187	35	170
ALANINE BIOSYNTHESIS II	ALANINE BIOSYNTHESIS II	0.269158	0.584389	1	UNG,HSPA2,ACTN1,DMD,CD46,MYH10,TCF4,RRAS,SLC25A6,GYS1,ITGB5,PLS3,MYL6B,MYH11,HIST1H1B,CDK4,PYGB,GJA1,HLA-DRB1,CD44,PFKL,HIST1H1E,SLC2A1,STMN1,CUL3,SLC2A4,APP,VCL,ERCC2,RALB,TOP1,ATP1A3,HLA-C,MYH7B	1.07859	0.261169	34	168
ALANINE DEGRADATION III	ALANINE DEGRADATION III	0.269158	0.584389	1	UNG,HSPA2,ACTN1,DMD,CD46,MYH10,TCF4,RRAS,SLC25A6,GYS1,ITGB5,PLS3,MYL6B,MYH11,HIST1H1B,CDK4,PYGB,GJA1,HLA-DRB1,CD44,PFKL,HIST1H1E,SLC2A1,STMN1,CUL3,SLC2A4,APP,VCL,ERCC2,RALB,TOP1,ATP1A3,HLA-C,MYH7B	1.07859	0.261169	34	168
HISTIDINE DEGRADATION VI	HISTIDINE DEGRADATION VI	0.277305	0.584649	-1	S100B,RPS6KA1,STAT3,SAA1,NUP43,MAP2K1,MAP2K2,HIST2H2BE,DDX19B,CDK2,HIST3H2A,UBE2V2,SMAD4,MAPK14,TP53BP1,PEBP1,DHPS,GLYR1,EIF4A2,PPA1,CUL4B,EEF1A2,NRAS,CASP9,PPP2R5D,SH3GL2,PPP2R5C,EIF4EBP1	-1.07825	-0.262156	28	126
HISTIDINE DEGRADATION III	HISTIDINE DEGRADATION III	0.277305	0.584649	-1	S100B,RPS6KA1,STAT3,SAA1,NUP43,MAP2K1,MAP2K2,HIST2H2BE,DDX19B,CDK2,HIST3H2A,UBE2V2,SMAD4,MAPK14,TP53BP1,PEBP1,DHPS,GLYR1,EIF4A2,PPA1,CUL4B,EEF1A2,NRAS,CASP9,PPP2R5D,SH3GL2,PPP2R5C,EIF4EBP1	-1.07825	-0.262156	28	126
GLYCINE DEGRADATION (CREATINE BIOSYNTHESIS)	GLYCINE DEGRADATION (CREATINE BIOSYNTHESIS)	0.278483	0.584649	1	UNG,ACTN1,DMD,CD46,TCF4,RRAS,SLC25A6,GYS1,SLC9A1,ITGB5,PLS3,GATM,MYL6B,HIST1H1B,CDK4,PYGB,ANXA7,CSNK2A2,GJA1,HLA-DRB1,CD44,PFKL,HIST1H1E,SLC2A1,STMN1,ATP2B1,SLC2A4,VCL,HK1,ERCC2,RALB,TOP1,ATP1A3,HLA-C,RAB6A	1.07356	0.259365	35	171
D-<IMYO</I-INOSITOL (1,4,5)-TRISPHOSPHATE DEGRADATION	D-<IMYO</I-INOSITOL (1,4,5)-TRISPHOSPHATE DEGRADATION	0.278982	0.584649	-1	S100B,ENO3,IMPA2,MTHFD2,HMOX2,SKI,CPTP,EZR,LNX1,LCP1,TPT1,GLUL,FDPS,ADH5,PFDN1,PEPD,TRIM54,TXN,CNBP,RABGGTB,BCR,AAMP,SUMO2,HSPA1B,PGAM2,GSPT1,EEF2,PYGM,AKR1B1,IMPDH2,IMPA1,APEH,HSF2,UBA3,INPP5J,CKB,PCNA,YWHAZ,RPS6KA5,HARS,NXF1,INPP1,PKM,XRCC5,MIF,HERPUD1,DARS,XRCC6,SLC25A4,BRAF	-1.07351	-0.254301	50	153
GLUCONEOGENESIS I	GLUCONEOGENESIS I	0.285714	0.593207	-1	ENO3,GLUD2,HK3,ME3,GPI,ALDOC,PSMD14,PPP1CC,PGD,CDK2,ACAT1,NPEPPS,ALDOA,ALDH2,PRDX1,CKM,DNAJA1,PPP1CA,MDH1,TXN,ATP5A1,PSMB2,LDHB,ENO1,GOT1,SUMO2,TUBB2B,HSPA1B,LDHA,PGAM2,GSPT1,FH,NEDD4L,NAA15,TRIM63,UBE2B,ACAT2,MDH2,ME1,EEF1A2,LSM2,ABCE1,NEDD4,ATP6V1E1	-1.06265	-0.247796	44	177
PREGNENOLONE BIOSYNTHESIS	PREGNENOLONE BIOSYNTHESIS	0.287989	0.593207	1	IGF1R,FMO3,FYN,TM7SF2,CYP2S1,CDIPT,OSBPL10,SPTBN1,GPX8,CYB5R3,CYB5R2,SMAD2,PRKAB2,FMO4,BCAP31,CREBBP,HOMER3,PSEN1,APOE,HSPA4,RNF40,PGRMC2,CNOT1,NCK1,SCD5,HSPB2,HSPE1,SURF4,PEMT,RBL2	1.07292	0.270667	30	126
S-ADENOSYL-L-METHIONINE BIOSYNTHESIS	S-ADENOSYL-L-METHIONINE BIOSYNTHESIS	0.297356	0.600224	-1	PSMA4,HAT1,AK6,PSMD14,GPN1,PGD,CDK2,PSMA7,ALDH2,HMGCS2,DNAJA1,BRIX1,PSMA6,UTP15,EIF4A1,PFKM,CNBP,PSMD7,SUMO2,CSE1L,HSPA1B,USP10,PGAM2,MDN1,CCT4,RUVBL2,PPP2R2D,DRG1,EEF2,EIF4A2,PSMC1,EEF1A2,MRTO4,GTF2H2C	-1.05832	-0.245578	34	183
ETHANOL DEGRADATION II	ETHANOL DEGRADATION II	0.297903	0.600224	-1	SERPINA3,ENO3,ACSS3,NEDD8,PSMD14,CPT2,IFT27,OLA1,PGD,CDK2,NPEPPS,ADH5,ALDH2,DNAJA1,ACSS2,EIF4A1,ANKRD17,CNBP,ADH1B,SUMO2,TUBB2B,HSPA1B,USP10,CCT2,PGAM2,ECI2,RUVBL2,DRG1,EEF2,PPA2,NOP2,XRN2,EIF4A2,MDH2,EEF1A2,PRPF40A	-1.05881	-0.246301	36	180
CREATINE-PHOSPHATE BIOSYNTHESIS	CREATINE-PHOSPHATE BIOSYNTHESIS	0.298867	0.600224	-1	ENO3,MTHFD2,FHL2,TCEB2,SKI,PPP1CC,LCP1,CDK2,TPT1,ALDOA,FDPS,ADH5,PEPD,CKM,PPP1CA,TRIM54,MIB1,TXN,LDHB,BCR,ENO1,SUMO2,MAPK14,HSPA1B,NOS1AP,PSMA3,LDHA,PGAM2,EEF2,TRIM63,OTUB1,PYGM	-1.06368	-0.252307	32	152
D-GLUCURONATE DEGRADATION I	D-GLUCURONATE DEGRADATION I	0.309883	0.617206	1	UNG,ACTN1,DMD,CD46,TCF4,RRAS,SLC25A6,GYS1,SLC9A1,ITGB5,PLS3,MYL6B,HIST1H1B,CDK4,PYGB,ANXA7,CSNK2A2,GJA1,HLA-DRB1,CD44,PFKL,HIST1H1E,SLC2A1,STMN1,ATP2B1,SLC2A4,APP,VCL,HK1,ERCC2,RALB,TOP1,ATP1A3,HLA-C	1.05744	0.255471	34	171
FOLATE POLYGLUTAMYLATION	FOLATE POLYGLUTAMYLATION	0.317154	0.625339	-1	GLUD2,JMJD6,DECR1,C10ORF76,SHMT1,PSMD14,ZBTB8OS,RBM6,H2AFV,NPEPPS,PSMB2,CCDC58,BRE,TFB1M,NT5C3B,GOT1,SUMO2,HSPA1B,PPHLN1,USP10,WDR81,NEDD4L,FPGS,EEF2,PRUNE,OTUB1,XRN2,MADD,PCID2,EEF1A2,PRPF40A	-1.05592	-0.252483	31	144
MELATONIN DEGRADATION II	MELATONIN DEGRADATION II	0.319156	0.625339	1	UNG,ACTN1,DMD,CD46,TCF4,RRAS,SLC25A6,GYS1,SLC9A1,ITGB5,PLS3,MYL6B,HIST1H1B,CDK4,PYGB,ANXA7,CSNK2A2,NDRG1,GJA1,HLA-DRB1,CD44,PFKL,HIST1H1E,SLC2A1,STMN1,ATP2B1,SLC2A4,VCL,HK1,ERCC2,RALB,TOP1,ATP1A3,HLA-C,RAB6A	1.05416	0.254837	35	170
LEUKOTRIENE BIOSYNTHESIS	LEUKOTRIENE BIOSYNTHESIS	0.330355	0.633293	-1	MGST1,ENO3,PLTP,MTHFD2,CD53,SKI,NAMPT,EZR,LCP1,CDK2,NPEPPS,TPT1,GLUL,FDPS,ADH5,PEPD,PFKM,TXN,BCR,CSE1L,HSPA1B,COTL1,PGAM2,GSPT1,NEDD4L,EEF2,PYGM,NQO1,AKR1B1,IMPDH2,PRPF40A,LTA4H,APEH,NEDD4,FUT11,KPNA3,ECSIT,CKB,UCHL3,PRKACG,PCNA,LTC4S,NME1,HARS,NUBPL	-1.04673	-0.247062	45	157
URACIL DEGRADATION II (REDUCTIVE)	URACIL DEGRADATION II (REDUCTIVE)	0.331552	0.633293	1	UNG,ACTN1,DMD,CD46,TCF4,RRAS,SLC25A6,GYS1,SLC9A1,ITGB5,PLS3,MYL6B,HIST1H1B,CDK4,PYGB,ANXA7,CSNK2A2,GJA1,HLA-DRB1,CD44,PFKL,HIST1H1E,SLC2A1,STMN1,ATP2B1,SLC2A4,VCL,HK1,ERCC2,RALB,TOP1,ATP1A3,HLA-C	1.0505	0.255096	33	165
THYMINE DEGRADATION	THYMINE DEGRADATION	0.331552	0.633293	1	UNG,ACTN1,DMD,CD46,TCF4,RRAS,SLC25A6,GYS1,SLC9A1,ITGB5,PLS3,MYL6B,HIST1H1B,CDK4,PYGB,ANXA7,CSNK2A2,GJA1,HLA-DRB1,CD44,PFKL,HIST1H1E,SLC2A1,STMN1,ATP2B1,SLC2A4,VCL,HK1,ERCC2,RALB,TOP1,ATP1A3,HLA-C	1.0505	0.255096	33	165
GLUTAMINE BIOSYNTHESIS I	GLUTAMINE BIOSYNTHESIS I	0.333727	0.633293	-1	ENO3,DMXL2,MTHFD2,SKI,PSMD14,EZR,LCP1,PGD,TPT1,GLUL,FDPS,ADH5,PEPD,EIF4A1,TXN,UBAP2,BCR,ENO1,ASPSCR1,NUDT18,SUMO2,CSE1L,HSPA1B,USP10,PGAM2,MDN1,GSPT1,NEDD4L,EEF2,PYGM,EIF4A2,AKR1B1,IMPDH2	-1.04513	-0.248146	33	151
D-<IMYO</I-INOSITOL (1,4,5,6)-TETRAKISPHOSPHATE BIOSYNTHESIS	D-<IMYO</I-INOSITOL (1,4,5,6)-TETRAKISPHOSPHATE BIOSYNTHESIS	0.343557	0.646854	1	UNG,ACTN1,DMD,CD46,TCF4,RRAS,SLC25A6,GYS1,SLC9A1,ITGB5,PLS3,LMNB1,MYL6B,HIST1H1B,CDK4,PYGB,ANXA7,CSNK2A2,GJA1,HLA-DRB1,CD44,PFKL,HIST1H1E,SLC2A1,STMN1,ATP2B1,SLC2A4,VCL,HK1,ERCC2,RALB,TOP1,ATP1A3,HLA-C,RAB6A	1.04236	0.251632	35	172
SULFITE OXIDATION IV	SULFITE OXIDATION IV	0.347117	0.648491	1	UNG,ACTN1,DMD,CD46,TCF4,RRAS,SLC25A6,GYS1,SLC9A1,ITGB5,PLS3,LMNB1,MYL6B,HIST1H1B,CDK4,PYGB,ANXA7,CSNK2A2,GJA1,HLA-DRB1,CD44,PFKL,HIST1H1E,SLC2A1,STMN1,ATP2B1,SLC2A4,VCL,HK1,ERCC2,RALB,TOP1,ATP1A3,HLA-C,RAB6A	1.04094	0.251486	35	171
GDP-L-FUCOSE BIOSYNTHESIS II (FROM L-FUCOSE)	GDP-L-FUCOSE BIOSYNTHESIS II (FROM L-FUCOSE)	0.350034	0.64891	1	UNG,ACTN1,DMD,CD46,TCF4,RRAS,SLC25A6,GYS1,SLC9A1,ITGB5,PLS3,LMNB1,MYL6B,HIST1H1B,CDK4,PYGB,ANXA7,CSNK2A2,GJA1,HLA-DRB1,CD44,PFKL,HIST1H1E,SLC2A1,STMN1,ATP2B1,SLC2A4,VCL,HK1,ERCC2,RALB,TOP1,ATP1A3,HLA-C,RAB6A	1.03942	0.251118	35	171
THIOREDOXIN PATHWAY	THIOREDOXIN PATHWAY	0.355641	0.653554	-1	ENO3,HINT1,TXNRD1,MTHFD2,TXNDC17,SKI,PSMD14,EZR,H2AFX,LCP1,PGD,TPT1,GLUL,FDPS,ADH5,RGN,PEPD,TXNRD2,PFKFB1,TXN,PRDX5,BCR,ENO1,TXN2,SUMO2,HSPA1B,NUTF2,ATP2A2,PGAM2,GSPT1,EEF2,PYGM,NQO1,AKR1B1,IMPDH2,MDH2	-1.0365	-0.243787	36	164
L-DOPACHROME BIOSYNTHESIS	L-DOPACHROME BIOSYNTHESIS	0.357963	0.653554	1	UNG,ACTN1,DMD,CD46,TCF4,RRAS,SLC25A6,GYS1,SLC9A1,ITGB5,PLS3,MYL6B,HIST1H1B,CDK4,PYGB,ANXA7,CSNK2A2,GJA1,HLA-DRB1,CD44,PFKL,HIST1H1E,SLC2A1,STMN1,ATP2B1,SLC2A4,VCL,HK1,ERCC2,RALB,TOP1,ATP1A3,HLA-C	1.03684	0.251059	33	168
ISOLEUCINE DEGRADATION I	ISOLEUCINE DEGRADATION I	0.362792	0.65739	-1	SERPINA1,KPNA2,STAT3,NEDD8,PSMD14,PTGES3,KARS,ACAT1,NPEPPS,ALDOA,FDPS,PSMC2,ALDH2,ACSS2,COPS5,PARK7,AKR1D1,PFAS,CNBP,BCAT2,ATG5,SUMO2,CSE1L,ECHS1,HSPA1B,USP10,ATPAF2,EEF1D,PAK2,TRIM63,OTUB1	-1.0345	-0.243579	31	162
HYPUSINE BIOSYNTHESIS	HYPUSINE BIOSYNTHESIS	0.371139	0.667496	-1	ENO3,PSMD14,CDK17,OLA1,RUVBL1,ADH5,ALDH2,DNAJA1,ASL,PFKM,RPL9,TXN,ATP5A1,CNBP,BCR,EIF5A2,NUDT18,SUMO2,EIF3I,CSE1L,GSK3A,HSPA1B,NIF3L1,PSMA3,CCT2,PGAM2,DHPS,GALT,CCT4,RUVBL2,EEF2,PYGM,RRM2B	-1.02881	-0.239905	33	177
HEME DEGRADATION	HEME DEGRADATION	0.374636	0.668794	1	UNG,ACTN1,DMD,CD46,TCF4,RRAS,SLC25A6,GYS1,SLC9A1,ITGB5,PLS3,MYL6B,HIST1H1B,CDK4,PYGB,ANXA7,CSNK2A2,TLN1,GJA1,HLA-DRB1,CD44,PFKL,HIST1H1E,THBS3,SLC2A1,STMN1,ATP2B1,SLC2A4,VCL,HK1,ERCC2,RALB,TOP1,ATP1A3,HLA-C	1.02925	0.247772	35	176
FLAVIN BIOSYNTHESIS IV (MAMMALIAN)	FLAVIN BIOSYNTHESIS IV (MAMMALIAN)	0.386875	0.685566	1	HSPA2,FBXW11,TCF4,ARHGAP1,ABI1,CAV1,ABLIM2,FCHSD2,ADAM17,CYFIP1,ANXA7,AKAP13,CBL,ARFGEF2,CSNK1A1,MYO9B,RALBP1,PTPN11,INPP5D,SHB,DAB2IP,PRTFDC1,MOV10,TBK1,GNA13,ACTG1,PTK2,UCHL1,DOCK1	1.02563	0.256931	29	131
PHOSPHATIDYLETHANOLAMINE BIOSYNTHESIS III	PHOSPHATIDYLETHANOLAMINE BIOSYNTHESIS III	0.395676	0.693604	1	UNG,ACTN1,DMD,CD46,TCF4,RRAS,SLC25A6,GYS1,SLC9A1,ITGB5,PLS3,MYL6B,HIST1H1B,CDK4,PYGB,ANXA7,CSNK2A2,GJA1,HLA-DRB1,CD44,PFKL,HIST1H1E,SLC2A1,STMN1,ATP2B1,SLC2A4,VCL,HK1,ERCC2,RALB,TOP1,ATP1A3,HLA-C	1.02032	0.246504	33	171
TETRAHYDROBIOPTERIN BIOSYNTHESIS I	TETRAHYDROBIOPTERIN BIOSYNTHESIS I	0.399184	0.693604	-1	CDK6,HIST2H2BE,AHSA1,LNX1,PGD,PSMB3,CDC37,PPP2CA,DDX47,DNAJA1,ATP5C1,PPP2CB,EIF4A1,PSMB2,EIF5A2,EIF3I,NTMT1,TUBB2B,TALDO1,HSPA1B,MAP2K4,RUVBL2,PPA2,EIF4A2,TPI1,PPA1,GNPAT,EEF1A2,CAP2,GALK2,PPP2R5D,SARS,CUL2,DSTN,CCT7,SH3GL2,ALDH1A1,EIF5A,PPP2R5C,PRKACG,YWHAZ,STIP1,ATL2,WDYHV1,ACTC1,PSMC5	-1.01738	-0.238078	46	172
PYRIMIDINE RIBONUCLEOTIDES INTERCONVERSION	PYRIMIDINE RIBONUCLEOTIDES INTERCONVERSION	0.400045	0.693604	-1	UBE2V1,NEDD8,PFN2,HIST2H2BE,PSMD14,HIST1H2AD,H2AFX,MCM4,CDK2,HIST3H2A,UBE2V2,GOT1,SUMO2,MAPK14,HSPA1B,PSMA3,PRUNE,STRAP,USP7,ZNF451,CAP2,MAPK13,NME7,ORC4,PCNA,YWHAZ,APEX1,NME1,RBX1,EP300,WDYHV1,PRKCE,RPA3,EPS15,MIF,NTPCR,CDKN1B	-1.01811	-0.251762	37	112
GLYCINE BIOSYNTHESIS I	GLYCINE BIOSYNTHESIS I	0.407556	0.701579	-1	GLUD2,NANS,JMJD6,DECR1,C10ORF76,SHMT1,PSMD14,ZBTB8OS,RBM6,H2AFV,NPEPPS,PSMB2,CCDC58,BRE,TFB1M,NT5C3B,GOT1,ELP4,SUMO2,HSPA1B,PPHLN1,USP10,WDR81,EEF2,PRUNE,OTUB1,XRN2,MADD,PCID2,METTL2A,EEF1A2	-1.01684	-0.242832	31	146
L-DOPA DEGRADATION	L-DOPA DEGRADATION	0.423967	0.724653	1	UNG,ACTN1,DMD,CD46,TCF4,RRAS,SLC25A6,GYS1,ITGB5,PLS3,MYL6B,HIST1H1B,CDK4,PYGB,HNMT,COL1A2,GJA1,HLA-DRB1,CD44,PFKL,HIST1H1E,SLC2A1,STMN1,COMT,VKORC1,SLC2A4,VCL,HK1,ERCC2,RALB,TOP1,ATP1A3,HLA-C	1.00958	0.244458	33	168
SORBITOL DEGRADATION I	SORBITOL DEGRADATION I	0.441091	0.748612	1	UNG,HSPA2,ACTN1,DMD,CD46,TCF4,RRAS,SLC25A6,GYS1,ITGB5,PLS3,MYL6B,HIST1H1B,PDLIM7,CDK4,PYGB,GJA1,HLA-DRB1,CD44,PFKL,HIST1H1E,SLC2A1,STMN1,SLC2A4,VCL,HK1,ERCC2,RALB,TOP1,ATP1A3,HLA-C	1.00362	0.242619	31	170
CHOLINE BIOSYNTHESIS III	CHOLINE BIOSYNTHESIS III	0.464936	0.762608	1	HSPA2,CAV1,THOC2,FCHSD2,AGAP3,SNCA,TEX264,MTOR,RPTOR,ANXA7,STAM,CORO1C,GJA1,ITGB1,THBS3,CUL3,HGS,SLC2A4,CEP170,PSEN1,APP,RHOA,AMPH,HSPA4,ACTB,TMEM165,TUBA1A,KPNB1,SEC63,EGFR,ACTG1,VAPA,ACTA2,CUL7,PLCG1,WASL,BIN1,TUBA4A,NTAN1,PLCG2,ARF6	0.994341	0.241434	41	164
DOPAMINE DEGRADATION	DOPAMINE DEGRADATION	0.468255	0.762608	1	HSPA2,TUBB8,MYH10,ALDH3A2,ENTPD5,RAB35,SLC25A6,MYH11,PRKAA2,HACD2,TUBB1,NDRG1,HNMT,ALDH1B1,FAF2,RAB33B,COMT,TUBB4B,CSNK1A1,VKORC1,SLC2A4,SULT1A1,TUBB,MME,BPGM,TUBA8,TUBA1A,MYH7B,RAB6A,STAG2,LMNA,EGFR,HSPB2,HSPE1,SLC25A5,MYH9,RBL2,CLUH,TUBA4A,EEF1A1,CSNK1E,MYH14	0.993223	0.242944	42	157
GLUTAMATE REMOVAL FROM FOLATES	GLUTAMATE REMOVAL FROM FOLATES	0.470598	0.762608	1	UNG,ACTN1,DMD,CD46,TCF4,RRAS,SLC25A6,GYS1,SLC9A1,ITGB5,PLS3,MYL6B,HIST1H1B,CDK4,PYGB,CSNK2A2,GJA1,HLA-DRB1,CD44,PFKL,HIST1H1E,SLC2A1,STMN1,SLC2A4,VCL,HK1,ERCC2,RALB,TOP1,ATP1A3,HLA-C	0.991966	0.240193	31	168
GLYCEROL DEGRADATION I	GLYCEROL DEGRADATION I	0.479685	0.762608	-1	VSIG4,ENO3,FCGR3A,IST1,MTHFD2,SKI,LCP1,NPEPPS,TPT1,ALDOA,GLUL,FDPS,ADH5,PEPD,DNAJA1,GPD1,AOX1,TXN,BCR,SUMO2,CSE1L,HSPA1B,EXOSC3,GPD2,CCT4,EEF2,EIF2S1,PYGM,AKR1B1,IMPDH2,EIF2S3,LIPE,APEH	-0.991836	-0.233282	33	164
TRNA CHARGING	TRNA CHARGING	0.479865	0.762608	-1	WARS,NEDD8,RARS2,PSMD14,KARS,EEF1E1,PGD,NPEPPS,FARSB,CARS2,PARK7,CNBP,EPRS,TARSL2,SUMO2,HSPA1B,QARS,USP10,PSMA3,EEF1D,NEDD4L,EEF2,OTUB1,UBE2B,AIMP2,EEF1A2,PRPF40A,USP7,ABCE1,AIMP1,NEDD4,SARS,CUL2,ECSIT,EEF1B2,RARS,LARS,YWHAZ,HDGF,LARS2,HARS,AARS,PSMC5,PPP2R1A,DARS,CCT3,RRAGC,YWHAE,MRPS16,GARS,RRAGD,CTSD,IARS,HSP90AB1,CUL1,HSP90AA1,MYH3,COX5B,GMPPB,TRMT10C,FARS2,HSPA4L,PSMC3,PARS2,PRRC2A,NARS2	-0.987558	-0.230085	66	178
PHENYLALANINE DEGRADATION I (AEROBIC)	PHENYLALANINE DEGRADATION I (AEROBIC)	0.484596	0.762608	-1	CALCOCO1,STAT3,ZFP36L1,LNX1,CHMP2A,ADH5,ASB15,COPS5,TXN,BCR,NUDT18,NTMT1,GORASP2,HSPA1B,NIF3L1,PYGM,PPA2,PPA1,CUL4B,RPS12,QDPR,ZNF451,RPS24,MUT,PCNA,HARS,UBA2,PAWR,NFKBIA,ST13,DCUN1D1,EP300,WDYHV1,HNRNPH1,HNRNPH2,POLR1A,SLC25A4,SNW1,GSTO1,HNRNPF,CUL1,RPS19,MYH3,COX5B,POLR3A	-0.986123	-0.23883	45	130
GLUTAMINE DEGRADATION I	GLUTAMINE DEGRADATION I	0.487241	0.762608	1	UNG,MRM1,ACTN1,DMD,CD46,TCF4,RRAS,SLC25A6,GYS1,ITGB5,PLS3,MYL6B,HIST1H1B,CDK4,PYGB,GJA1,HLA-DRB1,CD44,PFKL,HIST1H1E,SLC2A1,STMN1,SLC2A4,VCL,SPATA20,ERCC2,RALB,TOP1,ATP1A3,HLA-C	0.985621	0.239343	30	165
PHOSPHATIDYLETHANOLAMINE BIOSYNTHESIS II	PHOSPHATIDYLETHANOLAMINE BIOSYNTHESIS II	0.487742	0.762608	1	UNG,HSPA2,ACTN1,DMD,CD46,TCF4,RRAS,SLC25A6,GYS1,ITGB5,PLS3,MYL6B,HIST1H1B,CDK4,PYGB,STX16,GJA1,HLA-DRB1,CD44,PFKL,HIST1H1E,SLC2A1,STMN1,SLC2A4,VCL,ERCC2,HSPA4,RALB,TOP1,ATP1A3,MYL6,HLA-C	0.986793	0.23894	32	168
THE VISUAL CYCLE I (VERTEBRATES)	THE VISUAL CYCLE I (VERTEBRATES)	0.488219	0.762608	-1	ENO3,PLTP,UBE2G1,MTHFD2,NEDD8,SKI,ZBTB8OS,EZR,LCP1,TPT1,GLUL,FDPS,ADH5,RBP1,PEPD,TXN,CNBP,BCR,SUMO2,HSPA1B,CCDC25,COQ9,PGAM2,GSPT1,EEF2,AGFG1,PYGM,NQO1,AKR1B1,IMPDH2,NDUFA4,APEH,ORC4,CKB,UCHL3,PCNA,AKR1C1,AKR1C3,NME1,HARS,COA3,OLFM4,PKM,XRCC5,MIF,RPS2,DARS,XRCC6,SLC25A4,BRAF	-0.984645	-0.23544	50	144
TCA CYCLE II (EUKARYOTIC)	TCA CYCLE II (EUKARYOTIC)	0.490461	0.762608	-1	NEDD8,PSMD14,PPME1,CDK2,NPEPPS,ALDOA,ALDH2,DNAJA1,ACSS2,MDH1,EIF4A1,PARK7,PFKM,CNBP,ACADVL,BCAT2,GOT1,SUMO2,CSE1L,MAPK14,HSPA1B,PEBP1,USP10,PSMA3,CCT2,CCT4,FH,RUVBL2,NEDD4L,NAA15,TRIM63,OTUB1,SH3KBP1,EIF4A2,MDH2,PSMC1,EEF1A2,ABCE1,NEDD4,MAPK13,CUL2,GART,COPG2,SH3GL2,PCNA,YWHAZ,SUCLA2,CRYAB,RBX1,ATL2,PSMC5,PRKCE,LONP1,DARS,SUCLG1,YWHAE,ACO1,PPOX,SLC25A4	-0.984849	-0.229338	59	179
TRYPTOPHAN DEGRADATION TO 2-AMINO-3-CARBOXYMUCONATE SEMIALDEHYDE	TRYPTOPHAN DEGRADATION TO 2-AMINO-3-CARBOXYMUCONATE SEMIALDEHYDE	0.493106	0.762608	1	UNG,HSPA2,ACTN1,DMD,DPM1,TUBB8,RRAS,SLC25A6,GYS1,PLS3,TUBB1,CDK4,PYGB,HLA-DRB1,PFKL,HIST1H1E,SLC2A1,SEC24B,TUBB4B,CSNK1A1,TUBB,HK1,HAAO,HSPA4,RALB,ACTB,ATXN3,TOP1,TUBA8,TUBA1A,ATP1A3,HLA-C	0.98523	0.239496	32	163
PUTRESCINE BIOSYNTHESIS III	PUTRESCINE BIOSYNTHESIS III	0.494316	0.762608	1	UNG,HSPA2,ACTN1,DMD,CD46,TCF4,RRAS,SLC25A6,GYS1,ITGB5,PLS3,MYL6B,HIST1H1B,CDK4,PYGB,GJA1,HLA-DRB1,CD44,PFKL,HIST1H1E,SLC2A1,STMN1,SLC2A4,VCL,ERCC2,HSPA4,RALB,TOP1,ATP1A3,HLA-C,GCLC	0.982337	0.239191	31	161
<ITRANS, TRANS</I-FARNESYL DIPHOSPHATE BIOSYNTHESIS	<ITRANS, TRANS</I-FARNESYL DIPHOSPHATE BIOSYNTHESIS	0.498448	0.762608	1	UNG,HSPA2,ACTN1,DMD,CD46,TCF4,RRAS,SLC25A6,GYS1,ITGB5,PLS3,MYL6B,HIST1H1B,CDK4,PYGB,GJA1,HLA-DRB1,CD44,PFKL,HIST1H1E,SLC2A1,STMN1,SLC2A4,VCL,ERCC2,HSPA4,RALB,RNF114,TOP1,ATP1A3,HLA-C	0.981558	0.238356	31	165
1D-<IMYO</I-INOSITOL HEXAKISPHOSPHATE BIOSYNTHESIS V (FROM INS(1,3,4)P3)	1D-<IMYO</I-INOSITOL HEXAKISPHOSPHATE BIOSYNTHESIS V (FROM INS(1,3,4)P3)	0.500086	0.762608	1	UNG,ACTN1,DMD,CD46,TCF4,RRAS,SLC25A6,GYS1,SLC9A1,ITGB5,PLS3,MYL6B,HIST1H1B,CDK4,PYGB,CSNK2A2,GJA1,HLA-DRB1,CD44,PFKL,HIST1H1E,SLC2A1,STMN1,ATP2B1,SLC2A4,VCL,HK1,ERCC2,RALB,TOP1,ATP1A3,HLA-C	0.981443	0.237849	32	167
SERINE BIOSYNTHESIS	SERINE BIOSYNTHESIS	0.501417	0.762608	-1	C12ORF10,NEDD8,PSMD14,CHMP2B,PGD,CDK2,RPAP3,RPS9,DNAJA1,PFDN6,TXN,BCR,SUMO2,NTMT1,TUBB2B,MAPK14,HSPA1B,USP10,RPS4X,PGAM2,MEPCE,OTUB1,PYGM,ASNA1,PAFAH1B1,CAP2,CLN5,ETF1,MAPK13,RIC8A,CUL2,ERH,PRKACG,RPSA	-0.981966	-0.233148	34	151
METHYLMALONYL PATHWAY	METHYLMALONYL PATHWAY	0.502931	0.762608	-1	LGALS3,UBE2V1,ACACB,RARS2,UBE2N,H2AFX,MCCC2,BRE,UBE2V2,HLCS,BCL10,SUMO2,HSPA1B,TP53BP1,RUVBL2,PTEN,OTUB1,PPA2,NUP155,SMC2,UBE2B,EIF3M,CUL4B,USP7,SQSTM1,PCCB,NEDD4,CHD1,MUT	-0.979933	-0.234293	29	143
ADENINE AND ADENOSINE SALVAGE III	ADENINE AND ADENOSINE SALVAGE III	0.503132	0.762608	1	UNG,HSPA2,HPRT1,ACTN1,DMD,RRAS,SGCD,SLC25A6,GYS1,PLS3,FAP,CDK4,PYGB,CBL,HLA-DRB1,HIST1H1E,SLC2A1,ISCU,CUL3,SLC2A4,CEP170,HSPA4,RALB,ACTB,TOP1,ATP1A3,PRTFDC1,HLA-C,PRKAB1,GABARAPL2,LMNA,MOV10	0.980363	0.239656	32	158
HISTAMINE DEGRADATION	HISTAMINE DEGRADATION	0.517738	0.779843	1	HSPA2,TUBB8,MYH10,ALDH3A2,ENTPD5,RAB35,SLC25A6,MYH11,PRKAA2,HACD2,TUBB1,HNMT,ALDH1B1,FAF2,RAB33B,CUL3,COMT,TUBB4B,CSNK1A1,SLC2A4,TUBB,SLC35F6,MME,CAND1,HSPA4,BPGM,TUBA8,TUBA1A,MYH7B,GCLC,RAB6A,STAG2,GABARAPL2,LMNA,EGFR,HSPB2,HSPE1,SLC25A5,MYH9,CAMK2D,CLUH,TUBA4A,EEF1A1,CSNK1E,MYH14	0.975554	0.234845	45	176
ASPARAGINE BIOSYNTHESIS I	ASPARAGINE BIOSYNTHESIS I	0.521687	0.78091	-1	ENO3,MTHFD2,PFDN4,SKI,PSMD14,EZR,H2AFX,LCP1,PGD,CDK2,TPT1,ALDOA,GLUL,FDPS,ADH5,PEPD,COPS5,PFKFB1,TXN,ATG101,BCR,SUMO2,CSE1L,HSPA1B,ATP2A2,PGAM2,GSPT1,CCT4,EEF2,OTUB1,PYGM,NQO1,TPI1,AKR1B1,IMPDH2,ABCE1,APEH	-0.977307	-0.229248	37	167
NAD PHOSPHORYLATION AND DEPHOSPHORYLATION	NAD PHOSPHORYLATION AND DEPHOSPHORYLATION	0.544334	0.809781	1	UNG,HSPA2,ACTN1,DMD,CD46,TCF4,RRAS,SLC25A6,GYS1,ITGB5,PLS3,MYL6B,HIST1H1B,CDK4,PYGB,GJA1,HLA-DRB1,CD44,NADK2,PFKL,HIST1H1E,SLC2A1,STMN1,SLC2A4,VCL,HK1,ERCC2,RALB,SRPK2,TOP1,ATP1A3,HLA-C	0.965908	0.232846	32	174
PRPP BIOSYNTHESIS I	PRPP BIOSYNTHESIS I	0.553575	0.815434	1	UNG,HSPA2,ACTN1,DMD,EML4,TUBB8,RRAS,SLC25A6,TUBB1,CDK4,PYGB,SPG21,HIST1H1E,SLC2A1,TUBB4B,SLC2A4,TUBB,HK1,CAND1,PRPS1,RALB,VDAC1,TOP1,TUBA8,TUBA1A,HLA-C	0.960186	0.234977	26	156
GLYCINE BETAINE DEGRADATION	GLYCINE BETAINE DEGRADATION	0.554901	0.815434	-1	GLUD2,JMJD6,DECR1,C10ORF76,SHMT1,PSMD14,ZBTB8OS,RBM6,H2AFV,NPEPPS,PSMB2,CCDC58,BRE,TFB1M,NT5C3B,GOT1,ELP4,SUMO2,HSPA1B,PPHLN1,USP10,WDR81,EEF2,PRUNE,OTUB1,XRN2,MADD,PCID2,METTL2A,EEF1A2	-0.96256	-0.230159	30	144
ACETONE DEGRADATION I (TO METHYLGLYOXAL)	ACETONE DEGRADATION I (TO METHYLGLYOXAL)	0.563105	0.81752	1	FBXW11,SDC2,FMO3,RRAS,CYP2S1,DBNL,CYB5R3,NT5E,PYGB,APOA4,CYB5R2,TLN1,HIST1H1E,FMO4,BCAP31,MLLT4,CREBBP,PTPN11,PSEN1,APOE,HSPA4,PPFIA1,PGRMC2,HLA-C	0.955629	0.239238	24	132
BUPROPION DEGRADATION	BUPROPION DEGRADATION	0.563105	0.81752	1	FBXW11,SDC2,FMO3,RRAS,CYP2S1,DBNL,CYB5R3,NT5E,PYGB,APOA4,CYB5R2,TLN1,HIST1H1E,FMO4,BCAP31,MLLT4,CREBBP,PTPN11,PSEN1,APOE,HSPA4,PPFIA1,PGRMC2,HLA-C	0.955629	0.239238	24	132
METHIONINE DEGRADATION I (TO HOMOCYSTEINE)	METHIONINE DEGRADATION I (TO HOMOCYSTEINE)	0.566961	0.818189	-1	LGALS3,NEDD8,AK6,PSMD14,GPN1,PGD,CDK2,ALDH2,HMGCS2,DNAJA1,BRIX1,PSMA6,UTP15,EIF4A1,PFKM,CNBP,PSMD7,SUMO2,CSE1L,MAPK14,HSPA1B,USP10,PGAM2,MDN1,CCT4,PPP2R2D,EEF2,EIF4A2,PSMC1,EEF1A2,MRTO4,GTF2H2C	-0.961059	-0.223875	32	175
PYRIMIDINE DEOXYRIBONUCLEOTIDES <IDE NOVO</I BIOSYNTHESIS I	PYRIMIDINE DEOXYRIBONUCLEOTIDES <IDE NOVO</I BIOSYNTHESIS I	0.570924	0.819004	-1	UBE2V1,NEDD8,PFN2,PSMD14,LNX1,PPP1CC,PSMA7,DNAJA1,TXN,CNBP,RPS16,UBE2V2,GOT1,NUDT18,SUMO2,TUBB2B,CSE1L,MAPK14,HSPA1B,NIF3L1,RUVBL2,PTEN,FPGS,EEF2,PRUNE,STRAP,OTUB1,RRM2B,EEF1A2,LSM2,RPS3,ABCE1,CAP2,NME7,RPSA,YWHAZ,GTPBP4,RTF1,ERG,STIP1,NME1,WDYHV1,DDX49,SESN1,EPS15,MIF	-0.957188	-0.226746	46	153
INOSINE-5'-PHOSPHATE BIOSYNTHESIS II	INOSINE-5'-PHOSPHATE BIOSYNTHESIS II	0.585238	0.826267	-1	ENO3,CALCOCO2,DBI,MTHFD2,SHMT1,SKI,PSMD14,EZR,H2AFX,LCP1,PGD,TPT1,GLUL,FDPS,ADH5,PEPD,PFKFB1,TXN,BCR,UBE2M,ADSL,GOT1,HSPA1B,ATP2A2,PGAM2,GSPT1,EEF2,OTUB1,PYGM,PPA2,NQO1,PPA1,AKR1B1,IMPDH2	-0.956573	-0.225002	34	163
ALANINE BIOSYNTHESIS III	ALANINE BIOSYNTHESIS III	0.587361	0.826267	1	UNG,HSPA2,ACTN1,ATP2A3,DMD,FYN,RRAS,CDNF,CANX,SLC25A6,GYS1,PLS3,MYL6B,CDK4,PYGB,RPTOR,HLA-DRB1,HIST1H1E,SLC2A1,ISCU,RB1CC1,NFS1,SLC2A4,PIK3C2B,NSF,TECR,RALB,TOP1,ATAD3A,ATP1A3,HLA-C	0.951769	0.228685	31	178
PYRUVATE FERMENTATION TO LACTATE	PYRUVATE FERMENTATION TO LACTATE	0.594703	0.826267	-1	SKI,AHSA1,H2AFX,PPME1,CDK2,ALDOA,PSMC2,CKM,DNAJA1,ATP5C1,COPS5,DDX39A,ATP5A1,LDHB,ENO1,SUMO2,NTMT1,MAPK14,HSPA1B,PSMA3,LDHA,ATP2A2,PGAM2,PTEN,TRIM63,ARF5,OTUB1,CUL4B,SQSTM1,SUCLG2,MAPK13,PANK4,CKMT2,CKB,HNRNPAB,PCNA,UQCR10,YWHAZ,SUCLA2,HNRNPD,KCNJ11,EP300,PSMC5,RPA3,PKM	-0.950102	-0.225027	45	154
PHOSPHATIDYLCHOLINE BIOSYNTHESIS I	PHOSPHATIDYLCHOLINE BIOSYNTHESIS I	0.59575	0.826267	-1	ENO3,KPNA2,GPI,PAPOLA,ALDH2,HMGCS2,DNAJA1,ASL,COQ6,PFKM,TXN,ATP5A1,NCBP2,SUMO2,EIF3I,TALDO1,CSE1L,HSPA1B,PSMA3,CCT2,PGAM2,GALT,CCT4,RUVBL2,EEF2,RPS17,RRM2B,GALK2,ATP6V1E1,LCMT1,DFFA,COPG2,CCT7,RPRD1B,ALDH1A1,TMOD1,YWHAZ,CHPT1,STIP1,NUP50,ST13,ACTC1,PSMC5,EXOSC10	-0.951323	-0.221531	44	179
CARDIOLIPIN BIOSYNTHESIS II	CARDIOLIPIN BIOSYNTHESIS II	0.598991	0.826267	-1	RPS15A,SKI,RPS13,RPS18,ADH5,PPP2CA,RPS9,PEPD,ATG16L1,MAGOH,RPL9,TXN,RPS16,RPS7,BCR,NCBP2,ATG5,HSPA1B,RPS4X,GSPT1,EEF2,RPS17,RPLP2,PYGM,IMPDH2,RPS12,CASC3,RPS3,SQSTM1,RPS20,ETF1,RPS24,RPL23,CKB,RPS27,RPSA,PCNA,PPP2R2A,RPS21,HARS,RPS15,SRP72,PPP2R1A,GSPT2,XRCC5,SMG9,SRP9,RPS2,RPS29,RPS5,XRCC6,RPLP0,SLC25A4	-0.952181	-0.220506	53	186
TRYPTOPHAN DEGRADATION X (MAMMALIAN, VIA TRYPTAMINE)	TRYPTOPHAN DEGRADATION X (MAMMALIAN, VIA TRYPTAMINE)	0.59911	0.826267	1	HSPA2,TUBB8,MYH10,ALDH3A2,ENTPD5,RAB35,SLC25A6,MYH11,PRKAA2,HACD2,TUBB1,NDRG1,ALDH1B1,FAF2,RAB33B,CUL3,TUBB4B,CSNK1A1,SLC2A4,TUBB,SLC35F6,MME,CAND1,BPGM,TUBA8,TUBA1A,MYH7B,GCLC,RAB6A,STAG2,GABARAPL2,LMNA,EGFR,HSPB2,HSPE1,SLC25A5,MYH9,CLUH,TUBA4A,EEF1A1,CSNK1E,MYH14,BSG,RAB1A,MAEA	0.947549	0.22842	45	174
UDP-D-XYLOSE AND UDP-D-GLUCURONATE BIOSYNTHESIS	UDP-D-XYLOSE AND UDP-D-GLUCURONATE BIOSYNTHESIS	0.600965	0.826267	1	UNG,ACTN1,DMD,FYN,CD46,TCF4,RRAS,SLC25A6,GYS1,PLS3,MYL6B,HIST1H1B,CDK4,PYGB,STAM,GJA1,HLA-DRB1,CD44,PFKL,HIST1H1E,SLC2A1,STMN1,HGS,SLC2A4,ERCC2,RALB,TOP1,ATP1A3,SEH1L,HLA-C	0.946237	0.230245	30	162
PROLINE BIOSYNTHESIS I	PROLINE BIOSYNTHESIS I	0.603415	0.826267	-1	ENO3,ATP6V1D,NEDD8,PSMD14,RUVBL1,ALDH2,DNAJA1,ASL,PARK7,PFKM,ATP5A1,CNBP,SUMO2,EIF3I,TUBB2B,HSPA1B,TP53BP1,USP10,PSMA3,CCT2,PGAM2,NUDT21,GALT,CCT4,RUVBL2,EEF2,RRM2B,LBP,EIF2S3,EEF1A2,GALK2,GART,COPG2,CCT7,ALDH1A1,DAB2	-0.950829	-0.222239	36	173
GLUTATHIONE BIOSYNTHESIS	GLUTATHIONE BIOSYNTHESIS	0.610165	0.829808	-1	ENO3,MTHFD2,GCLM,PFDN4,SKI,PSMD14,EZR,IMPDH1,H2AFX,LCP1,TPT1,GLUL,FDPS,ADH5,ALDH2,PEPD,DNAJA1,ACSS2,PFKFB1,TXN,BCR,GSS,GOT1,CSE1L,HSPA1B,ATP2A2,PGAM2,GSPT1,EEF2,PYGM,IRF3,NQO1,TFIP11,AKR1B1,IMPDH2,EEF1A2	-0.948151	-0.222178	36	170
GLUTAMATE DEGRADATION III (VIA 4-AMINOBUTYRATE)	GLUTAMATE DEGRADATION III (VIA 4-AMINOBUTYRATE)	0.612888	0.829808	-1	ENO3,POLR2G,SHMT1,STXBP2,ZDHHC17,HIST1H2AD,SNRPG,H2AFX,PPP1CC,PAPOLA,PGD,CDK2,NPEPPS,DNAJA1,PPP1CA,TUFM,MAGOH,EIF4A1,ATP5A1,CNBP,PSMA2,NCBP2,SNRPD3,POLR2H,SUMO2,HSPA1B,CCT2,SNRPF,TXNL4A,GSPT1,EEF2,AGFG1,RPLP2	-0.950281	-0.219223	33	194
GDP-L-FUCOSE BIOSYNTHESIS I (FROM GDP-D-MANNOSE)	GDP-L-FUCOSE BIOSYNTHESIS I (FROM GDP-D-MANNOSE)	0.621027	0.830981	1	UNG,ACTN1,DMD,CD46,TCF4,RRAS,TSTA3,SLC25A6,GYS1,ITGB5,PLS3,MYL6B,HIST1H1B,CDK4,PYGB,GJA1,HLA-DRB1,CD44,PFKL,HIST1H1E,SLC2A1,STMN1,SLC2A4,VCL,HK1,ERCC2,RALB,TOP1,ATP1A3,HLA-C	0.940764	0.228155	30	166
LACTOSE DEGRADATION III	LACTOSE DEGRADATION III	0.623095	0.830981	-1	ENO3,LGALS3,MTHFD2,SKI,CTSA,EZR,H2AFX,LCP1,TPT1,GLUL,FDPS,ADH5,PEPD,SHARPIN,PFKFB1,TXN,BCR,HSPA1B,ATP2A2,PGAM2,GSPT1,MEPCE,EEF2,PYGM,NQO1,MADD,TFIP11,AKR1B1,IMPDH2,RFK,ABCE1,APEH,CTNNBIP1,FADD,TAB1,RBCK1,CKB,UCHL3,PCNA,POR,NEU1,NME1,HARS,TRAP1,ATP6AP2,PKM,XRCC5,MIF,RPS2,DARS,XRCC6,TMEM11,SLC25A4,BRAF,FBXO6,DSP,TAX1BP1,BAG4,YBX3,HSP90AA1,MYH3,COX5B,IDE	-0.943551	-0.221939	63	163
UBIQUINOL-10 BIOSYNTHESIS (EUKARYOTIC)	UBIQUINOL-10 BIOSYNTHESIS (EUKARYOTIC)	0.624098	0.830981	1	UNG,HSPA2,ACTN1,SDC2,DMD,CD46,CASK,TCF4,RRAS,SLC25A6,GYS1,PLS3,MYL6B,HIST1H1B,CDK4,PYGB,WBSCR16,HLA-DRB1,CD44,HIST1H1E,SLC2A1,SLC2A4,EPB41L2,HSPA4,RALB,TOP1,ATP1A3,HLA-C,DLG1	0.938374	0.227845	29	164
SPERMINE BIOSYNTHESIS	SPERMINE BIOSYNTHESIS	0.628107	0.831028	-1	ENO3,MTHFD2,NUP43,TP53RK,NEDD8,SKI,LAGE3,STXBP2,EZR,H2AFX,LCP1,TPT1,GLUL,FDPS,TPRKB,ADH5,PEPD,PFKFB1,TXN,BCR,IGBP1,GOT1,C14ORF142,HSPA1B,ATP2A2,PGAM2,GSPT1,MAPKAPK3,EEF2,PYGM,NQO1,AKR1B1,IMPDH2	-0.94195	-0.221549	33	164
&GAMMA;-LINOLENATE BIOSYNTHESIS II (ANIMALS)	&GAMMA;-LINOLENATE BIOSYNTHESIS II (ANIMALS)	0.634227	0.831028	-1	VSIG4,ENO3,CALCOCO2,EIF4E,PFDN4,GPI,PSMD14,HMGCR,NOVA2,H2AFX,LCP1,H2AFV,ALDH2,COPS5,PFKM,NMT1,SUMO2,DMAP1,TUBB2B,CSE1L,HSPA1B,RABAC1,COQ9,PGAM2,GALT,EEF2,PYGM	-0.937854	-0.221238	27	158
GUANOSINE NUCLEOTIDES DEGRADATION III	GUANOSINE NUCLEOTIDES DEGRADATION III	0.634478	0.831028	1	HSPA2,ACTN1,DMD,RRAS,CYP2S1,EXT2,SLC25A6,DLG3,MTOR,NT5E,CDK4,PYGB,RPTOR,GHITM,GJA1,HIST1H1E,SLC2A1,USP22,GNAQ,CEP170,NT5C2,ARL8A,HSPA4,RALB	0.931247	0.230695	24	143
NORADRENALINE AND ADRENALINE DEGRADATION	NORADRENALINE AND ADRENALINE DEGRADATION	0.640184	0.833969	-1	SERPINA3,ENO3,NEDD8,PSMD14,IFT27,PGD,NPEPPS,TPMT,ADH5,ALDH2,DNAJA1,ACSS2,EIF4A1,ANKRD17,CNBP,ADH1B,SUMO2,TUBB2B,HSPA1B,USP10,CCT2,COQ9,PGAM2,RUVBL2,DRG1,EEF2,INMT,ATP6V0D1,NOP2,XRN2,EIF4A2,MDH2,EEF1A2,PRPF40A	-0.938928	-0.218644	34	179
ACETYL-COA BIOSYNTHESIS III (FROM CITRATE)	ACETYL-COA BIOSYNTHESIS III (FROM CITRATE)	0.649678	0.84116	1	UNG,ACTN1,DMD,CD46,TCF4,RRAS,NOTCH2,SLC25A6,GYS1,PLS3,SNCA,MYL6B,HIST1H1B,CDK4,PYGB,SNTB1,HLA-DRB1,CD44,HIST1H1E,SLC2A1,STMN1,CUL3,HGS,SLC2A4,APP,CAND1,RALB,TOP1,ATP1A3,HLA-C,PRKAB1	0.927075	0.226765	31	157
METHIONINE SALVAGE II (MAMMALIA)	METHIONINE SALVAGE II (MAMMALIA)	0.652684	0.84116	1	UNG,ACTN1,DMD,CD46,TCF4,RRAS,SLC25A6,GYS1,ITGB5,PLS3,MYL6B,HIST1H1B,CDK4,PYGB,AKAP13,GJA1,HLA-DRB1,CD44,PFKL,HIST1H1E,SLC2A1,STMN1,SLC2A4,VCL,ERCC2,RALB,TOP1,ATP1A3,HLA-C	0.926667	0.225894	29	160
ADENOSINE NUCLEOTIDES DEGRADATION II	ADENOSINE NUCLEOTIDES DEGRADATION II	0.663638	0.848869	1	HSPA2,DMD,RRAS,CYP2S1,SGCD,FAP,MTOR,NT5E,CDK4,PYGB,RPTOR,GHITM,GJA1,HIST1H1E,SLC2A1,USP22,GNAQ,CEP170,NT5C2,ARL8A,HSPA4,RALB,ACTB,TOP1,HLA-C,LMNA,MOV10,RHOG,YWHAH,RBL2,LAMC1,SCAMP1	0.91987	0.228259	32	140
THIAMIN SALVAGE III	THIAMIN SALVAGE III	0.671724	0.848869	-1	PPIL1,CD2BP2,POLR2G,CHMP2B,SNRPG,CHMP2A,UBE2K,SNRPB2,VPS4A,PPIH,NCBP2,CDC40,SNRPD3,POLR2H,SNRPA1,UBE2D4,HSPA1B,SNRPF,TXNL4A,NEDD4L,PTEN,DHX15,CCAR1,SF3A2,LSM4,PRPF40A,LSM2,CTNNBL1,NEDD4,VTA1,SRSF11,LSM7,RBCK1,POLR2J,SNRPE,SRSF3,HNRNPD,DNAJC8,DHX38,RNF19A,SNRPC,SNRPN,HNRNPH1,CHMP3,HNRNPH2,ISY1,TSG101,SNW1,FBXO6,SNRPA,GTF2F1,HNRNPF,PQBP1,TRIM21,NCBP1,PRPF31,FBXO40	-0.928967	-0.215884	57	181
ACYL CARRIER PROTEIN METABOLISM	ACYL CARRIER PROTEIN METABOLISM	0.676839	0.848869	1	UNG,ACTN1,DMD,CD46,TCF4,RRAS,SLC25A6,GYS1,ITGB5,PLS3,MYL6B,HIST1H1B,CDK4,PYGB,GJA1,HLA-DRB1,CD44,PFKL,HIST1H1E,SLC2A1,STMN1,USP22,SLC2A4,VCL,HK1,ERCC2,RALB,ACTB,TOP1,ATP1A3,HLA-C	0.920545	0.222899	31	168
METHYLGLYOXAL DEGRADATION VI	METHYLGLYOXAL DEGRADATION VI	0.678553	0.848869	1	UNG,HSPA2,ACTN1,DMD,CD46,TCF4,RRAS,SLC25A6,GYS1,PLS3,MYL6B,HIST1H1B,CDK4,PYGB,TIMM22,HLA-DRB1,CD44,HIST1H1E,REPIN1,SLC2A1,STMN1,CUL3,SLC2A4,LDHD,CAND1,RALB,VDAC1,TOP1,ATP1A3,HLA-C	0.919624	0.222676	30	168
LANOSTEROL BIOSYNTHESIS	LANOSTEROL BIOSYNTHESIS	0.681982	0.848869	1	UNG,ACTN1,DMD,CD46,TCF4,RRAS,SLC25A6,GYS1,ITGB5,PLS3,MYL6B,HIST1H1B,CDK4,PYGB,GJA1,HLA-DRB1,CD44,PFKL,HIST1H1E,SLC2A1,STMN1,SLC2A4,VCL,HK1,ERCC2,RALB,TOP1,ATP1A3,HLA-C	0.917744	0.222221	29	168
<IS</I-METHYL-5'-THIOADENOSINE DEGRADATION II	<IS</I-METHYL-5'-THIOADENOSINE DEGRADATION II	0.685	0.848869	1	UNG,ACTN1,DMD,CD46,TCF4,RRAS,SLC25A6,GYS1,ITGB5,PLS3,MYL6B,HIST1H1B,CDK4,PYGB,GJA1,HLA-DRB1,CD44,PFKL,HIST1H1E,SLC2A1,STMN1,SLC2A4,CEP170,VCL,HK1,ERCC2,RALB,TOP1,ATP1A3,HLA-C	0.916189	0.222482	30	165
FATTY ACID &BETA;-OXIDATION I	FATTY ACID &BETA;-OXIDATION I	0.685552	0.848869	-1	CALCOCO2,STAT3,HADHA,HADHB,SKI,HAT1,PSMD14,H2AFV,ALDOA,PSMC2,TNNI3K,MED23,PARK7,HSD17B4,NMT1,ECH1,SUMO2,TUBB2B,ECHS1,HSPA1B,RABAC1,PSMA3,ACAA2,COQ9,ECI2	-0.919855	-0.219432	25	147
TYROSINE DEGRADATION I	TYROSINE DEGRADATION I	0.6906	0.848869	1	UNG,ACTN1,DMD,CD46,TCF4,RRAS,HSPG2,SLC25A6,GYS1,PLS3,MYL6B,CDK4,PYGB,NCOA2,HLA-DRB1,PCDHGC3,CD44,SORT1,STAT5B,HIST1H1E,SLC2A1,CREBBP,SLC2A4,UBE3A,RALB,TOP1,ATP1A3,HLA-C,BAG1,HDAC2,EGFR	0.912523	0.224233	31	152
GLUTAMATE BIOSYNTHESIS II	GLUTAMATE BIOSYNTHESIS II	0.694911	0.848869	-1	ORM1,ENO3,GLUD2,MTHFD2,NEDD8,SKI,EZR,H2AFX,LCP1,ATP5H,CRP,TPT1,ALDOA,GLUL,FDPS,ADH5,PEPD,GPD1,PFKFB1,TXN,BCR,HSPA1B,PGAM2,GSPT1,EEF2,PYGM,NQO1,AKR1B1,IMPDH2	-0.917433	-0.216848	29	156
GLUTAMATE DEGRADATION X	GLUTAMATE DEGRADATION X	0.694911	0.848869	-1	ORM1,ENO3,GLUD2,MTHFD2,NEDD8,SKI,EZR,H2AFX,LCP1,ATP5H,CRP,TPT1,ALDOA,GLUL,FDPS,ADH5,PEPD,GPD1,PFKFB1,TXN,BCR,HSPA1B,PGAM2,GSPT1,EEF2,PYGM,NQO1,AKR1B1,IMPDH2	-0.917433	-0.216848	29	156
ETHANOL DEGRADATION IV	ETHANOL DEGRADATION IV	0.698873	0.848869	-1	ENO3,AKAP8L,ACSS3,NEDD8,PSMD14,CPT2,IFT27,OLA1,PSMA1,PGD,CDK2,NPEPPS,ALDH2,DNAJA1,ACSS2,EIF4A1,PARK7,CNBP,SUMO2,NTMT1,TUBB2B,HSPA1B,USP10,CCT2,PGAM2,RUVBL2,NEDD4L,EEF2,PPA2,XRN2,EIF4A2,MDH2,EEF1A2,PRPF40A	-0.921475	-0.213608	34	184
RETINOL BIOSYNTHESIS	RETINOL BIOSYNTHESIS	0.708577	0.848869	-1	FKBP5,PLTP,ABHD5,CDK6,NEDD8,LRSAM1,ZBTB8OS,ADH5,RBP1,PLIN5,SHARPIN,TXN,CNBP,BCR,SUMO2,TUBB2B,HSPA1B,CCDC25,COQ9,PNPLA2,AGFG1,PYGM,PTPRK,NDUFA4,EEF1A2,SUCLG2,SARS,CUL2,CALR	-0.908625	-0.217912	29	140
ARSENATE DETOXIFICATION I (GLUTAREDOXIN)	ARSENATE DETOXIFICATION I (GLUTAREDOXIN)	0.715163	0.848869	-1	ENO3,MTHFD2,SKI,PSMD14,EZR,H2AFX,LCP1,CDK2,TPT1,GLUL,FDPS,ADH5,PEPD,PFKFB1,TXN,BCR,ENO1,SUMO2,HSPA1B,NOS1AP,AS3MT,ATP2A2,PGAM2,GSPT1,CCT4,NEDD4L,EEF2,PYGM,NQO1,AKR1B1,IMPDH2,ABCE1,APEH,NEDD4,UCHL5,CKB,UCHL3,LYRM1,PCNA,POR,NME1,HARS,NXF1,PKM,XRCC5,MIF,MTAP,RPS2,DARS,XRCC6,TMEM11,SLC25A4,BRAF	-0.912711	-0.215234	53	159
INOSITOL PYROPHOSPHATES BIOSYNTHESIS	INOSITOL PYROPHOSPHATES BIOSYNTHESIS	0.7229	0.848869	1	UNG,ACTN1,DMD,CD46,TCF4,RRAS,SLC25A6,GYS1,ITGB5,PLS3,MYL6B,HIST1H1B,CDK4,PYGB,GJA1,HLA-DRB1,CD44,PFKL,GTPBP6,HIST1H1E,SLC2A1,STMN1,SLC2A4,VCL,ERCC2,RALB,BAG6,TOP1,ATP1A3,HLA-C	0.904204	0.219289	30	166
XANTHINE AND XANTHOSINE SALVAGE	XANTHINE AND XANTHOSINE SALVAGE	0.723925	0.848869	-1	ENO3,MTHFD2,SKI,PSMD14,EZR,H2AFX,LCP1,CDK2,TPT1,GLUL,FDPS,ADH5,PEPD,PFKFB1,TXN,BCR,ENO1,GOT1,SUMO2,HSPA1B,NOS1AP,ATP2A2,PGAM2,GSPT1,CCT4,NEDD4L,EEF2,PYGM,NQO1,AKR1B1,IMPDH2,ABCE1,APEH,NEDD4,UCHL5,CKB,UCHL3,LYRM1,PCNA,POR,NME1,HARS,NXF1,PKM,XRCC5,MIF,MTAP,RPS2,DARS,XRCC6,TMEM11,SLC25A4,BRAF	-0.910571	-0.214704	53	160
METHYLGLYOXAL DEGRADATION I	METHYLGLYOXAL DEGRADATION I	0.726634	0.848869	1	UNG,ACTN1,DMD,CD46,TCF4,RRAS,SLC25A6,GYS1,ITGB5,PLS3,MYL6B,HIST1H1B,CDK4,PYGB,GJA1,HLA-DRB1,CD44,PFKL,HIST1H1E,SLC2A1,STMN1,SLC2A4,ANXA6,APP,VCL,ERCC2,HSPA4,FKBP2,RALB,TOP1,ATP1A3,HLA-C	0.902547	0.218186	32	170
OXIDATIVE ETHANOL DEGRADATION III	OXIDATIVE ETHANOL DEGRADATION III	0.728455	0.848869	-1	ENO3,ACSS3,NEDD8,PSMD14,CPT2,IFT27,OLA1,PGD,CDK2,NPEPPS,ALDH2,DNAJA1,ACSS2,EIF4A1,CNBP,ENO1,SUMO2,TUBB2B,CSE1L,HSPA1B,USP10,CCT2,PGAM2,ECI2,RUVBL2,EEF2,PPA2,ATP6V0D1,XRN2,EIF4A2,MDH2,EEF1A2,PRPF40A	-0.912542	-0.211909	33	182
STEARATE BIOSYNTHESIS I (ANIMALS)	STEARATE BIOSYNTHESIS I (ANIMALS)	0.736842	0.848869	1	HSPA2,FMO3,SLC25A35,TUBB8,CANX,PPP3CC,CYB5R3,TUBB1,CAMK2B,NDRG1,CYB5R2,TMEM173,FMO4,BCAP31,TUBB4B,USP22,RTN3,SLC2A4,APP,TUBB,NT5C2,HSPA4,TRRAP,WDR18,PGRMC2,UPF2,EGFR,ACSL4,SLC27A6,SLC25A5,YWHAQ,TOP2B,CUL7,CLUH,WASL,EEF1A1,SLC25A3	0.892141	0.221246	37	142
L-CYSTEINE DEGRADATION III	L-CYSTEINE DEGRADATION III	0.738275	0.848869	1	UNG,HSPA2,ACTN1,DMD,CD46,TCF4,RRAS,SLC25A6,GYS1,ITGB5,PLS3,MYL6B,HIST1H1B,CDK4,PYGB,GJA1,HLA-DRB1,CD44,PFKL,HIST1H1E,SLC2A1,STMN1,NFS1,SLC2A4,VCL,ERCC2,HSPA4,RALB,TOP1,ATP1A3,HLA-C	0.897053	0.216924	31	169
MOLYBDENUM COFACTOR BIOSYNTHESIS	MOLYBDENUM COFACTOR BIOSYNTHESIS	0.742702	0.848869	-1	MOCS2,MAP2K2,UBE2K,DYNLT1,C17ORF89,PSMC2,PRKCD,TUFM,RPL9,TXN,MPST,TST,EPRS,MOCS3,MAPK14,HSPA1B,PICK1,ATP2A2,COQ9,MAP2K4,NDUFAB1,MAPKAPK3,CCT4,UBE2B,STK10,NDUFA4,SUCLG2,HSCB,SARS,TAB1	-0.898449	-0.214574	30	145
GUANINE AND GUANOSINE SALVAGE I	GUANINE AND GUANOSINE SALVAGE I	0.747708	0.848869	-1	ENO3,MTHFD2,NEDD8,SKI,PSMD14,EZR,LCP1,CDK2,TPT1,GLUL,FDPS,ADH5,PEPD,TXN,BCR,ENO1,ATG5,SUMO2,NTMT1,HSPA1B,NOS1AP,PGAM2,GSPT1,CCT4,NEDD4L,EEF2,OTUB1,PYGM,AKR1B1,IMPDH2,ABCE1,APEH,CTSB,NEDD4	-0.901252	-0.212724	34	157
GLUTAMATE DEPENDENT ACID RESISTANCE	GLUTAMATE DEPENDENT ACID RESISTANCE	0.750965	0.848869	-1	ENO3,POLR2G,SHMT1,STXBP2,ZDHHC17,HIST1H2AD,SNRPG,H2AFX,PPP1CC,PAPOLA,PGD,CDK2,NPEPPS,DNAJA1,PPP1CA,TUFM,MAGOH,EIF4A1,ATP5A1,CNBP,PSMA2,NCBP2,SNRPD3,POLR2H,SUMO2,CCT2,SNRPF,TXNL4A,GSPT1,EEF2,AGFG1	-0.908485	-0.209172	31	195
UDP-<IN</I-ACETYL-D-GLUCOSAMINE BIOSYNTHESIS II	UDP-<IN</I-ACETYL-D-GLUCOSAMINE BIOSYNTHESIS II	0.751931	0.848869	-1	PSMA4,NEDD8,GPD1L,SHMT1,PSMD14,RUVBL1,PSMC2,ALDH2,TUFM,EIF4A1,GPD1,PFKM,CNBP,PSMD7,EPRS,SUMO2,TUBB2B,TALDO1,HSPA1B,USP10,NIF3L1,PSMA3,ATP2A2,CCT4,RUVBL2,PAK2,NAGK,FPGS,NUP155,EIF4A2	-0.904767	-0.21098	30	177
TAURINE BIOSYNTHESIS	TAURINE BIOSYNTHESIS	0.75357	0.848869	1	UNG,ACTN1,DMD,CD46,TCF4,RRAS,CYP2S1,SLC25A6,GYS1,PLS3,MYL6B,HIST1H1B,CDK4,PYGB,HLA-DRB1,UBE2D2,CD44,HIST1H1E,SLC2A1,STMN1,SLC2A4	0.886604	0.221263	21	136
L-CYSTEINE DEGRADATION I	L-CYSTEINE DEGRADATION I	0.75357	0.848869	1	UNG,ACTN1,DMD,CD46,TCF4,RRAS,CYP2S1,SLC25A6,GYS1,PLS3,MYL6B,HIST1H1B,CDK4,PYGB,HLA-DRB1,UBE2D2,CD44,HIST1H1E,SLC2A1,STMN1,SLC2A4	0.886604	0.221263	21	136
GLUTATHIONE REDOX REACTIONS I	GLUTATHIONE REDOX REACTIONS I	0.753908	0.848869	1	UNG,HSPA2,ACTN1,DMD,CD46,TCF4,RRAS,SLC25A6,GYS1,PLS3,MYL6B,GPX8,HIST1H1B,CDK4,PYGB,ATP6V1C1,PJA1,HLA-DRB1,HIST1H1E,SLC2A1,SLC2A4,CEP170,HSPA4,RALB,TOP1,ATP1A3,HLA-C	0.889661	0.218418	27	153
TRIACYLGLYCEROL DEGRADATION	TRIACYLGLYCEROL DEGRADATION	0.764222	0.848869	-1	FKBP5,ENO3,ABHD5,CDK6,MTHFD2,NEDD8,LRSAM1,SKI,LCP1,TPT1,FDPS,ADH5,PLIN5,PEPD,SHARPIN,TXN,BCR,TUBB2B,GORASP2,HSPA1B,PNPLA2,EEF2,PYGM,IMPDH2,EEF1A2,SUCLG2,APEH,SARS,CUL2,CALR,CKMT2,CKB,ABHD6,NOMO3,PRKACG,PCNA	-0.895983	-0.211361	36	158
TRIACYLGLYCEROL BIOSYNTHESIS	TRIACYLGLYCEROL BIOSYNTHESIS	0.764563	0.848869	1	HSPA2,ATP2A3,FBXW11,TUBB8,SACM1L,ITGB3,CANX,MLH1,TMEM30A,PRKAA2,TUBB1,ITGAV,ITGB1,ARFGEF2,TUBB4B,APP,TUBB,TECR,HSPA4,BAG6,TUBA8,TUBA1A,SEC63,UPF2,CYB5B,MOV10,LPIN3,SLC27A6,VAPA,ABCD2,PRKCSH,TUBA4A,EEF1A1,TM9SF4,STRN4	0.883512	0.217293	35	151
EICOSAPENTAENOATE BIOSYNTHESIS II (METAZOA)	EICOSAPENTAENOATE BIOSYNTHESIS II (METAZOA)	0.766218	0.848869	1	HSPA2,FMO3,SLC25A35,TUBB8,CANX,PPP3CC,CYB5R3,TUBB1,CAMK2B,NDRG1,CYB5R2,TMEM173,FMO4,BCAP31,TUBB4B,USP22,RTN3,SLC2A4,APP,TUBB,NT5C2,HSPA4,TRRAP,WDR18,PGRMC2,UPF2,EGFR,ACSL4,SLC27A6,YWHAQ,TOP2B,CUL7,CLUH,WASL,EEF1A1,SLC25A3	0.881211	0.218535	36	142
FATTY ACID &BETA;-OXIDATION III (UNSATURATED, ODD NUMBER)	FATTY ACID &BETA;-OXIDATION III (UNSATURATED, ODD NUMBER)	0.771387	0.848869	-1	ENO3,HINT1,MTHFD2,SKI,EZR,H2AFX,LCP1,TPT1,GLUL,FDPS,ADH5,RGN,PEPD,HSD17B4,PFKFB1,TXN,BCR,ENO1,ECH1,GOT1,SUMO2,HSPA1B,ATP2A2,COQ9,PGAM2,ECI2,GSPT1,EEF2,PYGM,NQO1,SCP2,AKR1B1,IMPDH2,MDH2,APEH,HSF2	-0.894439	-0.20981	36	167
DOLICHYL-DIPHOSPHOOLIGOSACCHARIDE BIOSYNTHESIS	DOLICHYL-DIPHOSPHOOLIGOSACCHARIDE BIOSYNTHESIS	0.772028	0.848869	-1	ENO3,RCHY1,POLR2G,ARAF,NEDD8,GPI,PSMD14,HMGCR,ZBTB16,NAE1,PBDC1,CNBP,ENO1,POLR2H,SUMO2,MOCS3,TUBB2B,HSPA1B,RUVBL2,NEDD4L,RRM2B,EEF1A2,ALG12,NEDD4,RRS1,POLR2J,FAM63B,PRKACG,RPSA,RPS6KA5	-0.88702	-0.212849	30	139
FATTY ACID ACTIVATION	FATTY ACID ACTIVATION	0.774901	0.848869	1	HSPA2,FMO3,SLC25A35,TUBB8,CANX,SLC25A6,PLS3,PPP3CC,CYB5R3,TUBB1,PYGB,NDRG1,CYB5R2,PFKL,TMEM173,FMO4,BCAP31,TUBB4B,USP22,RTN3,SLC2A4,APP,TUBB,HK1,NT5C2,HSPA4,BPGM,TRRAP,PGRMC2,UPF2,EGFR,ACSL4,SLC27A6,SLC25A5,YWHAQ,TOP2B,CUL7,CLUH,WASL,EEF1A1,SLC25A3	0.881276	0.214829	41	160
FATTY ACID &ALPHA;-OXIDATION II	FATTY ACID &ALPHA;-OXIDATION II	0.774901	0.848869	1	HSPA2,FMO3,SLC25A35,TUBB8,CANX,SLC25A6,PLS3,PPP3CC,CYB5R3,TUBB1,PYGB,NDRG1,CYB5R2,PFKL,TMEM173,FMO4,BCAP31,TUBB4B,USP22,RTN3,SLC2A4,APP,TUBB,HK1,NT5C2,HSPA4,BPGM,TRRAP,PGRMC2,UPF2,EGFR,ACSL4,SLC27A6,SLC25A5,YWHAQ,TOP2B,CUL7,CLUH,WASL,EEF1A1,SLC25A3	0.881276	0.214829	41	160
L-CARNITINE BIOSYNTHESIS	L-CARNITINE BIOSYNTHESIS	0.789969	0.86146	1	UNG,ACTN1,DMD,CD46,TCF4,RRAS,SLC25A6,GYS1,ITGB5,PLS3,MYL6B,HIST1H1B,CDK4,PYGB,GJA1,HLA-DRB1,CD44,PFKL,POLR3F,HIST1H1E,SLC2A1,STMN1,SLC2A4,VCL,ERCC2,RALB,TOP1,ATP1A3,HLA-C,NCK1,ITPR3	0.876888	0.212048	31	169
PURINE RIBONUCLEOSIDES DEGRADATION TO RIBOSE-1-PHOSPHATE	PURINE RIBONUCLEOSIDES DEGRADATION TO RIBOSE-1-PHOSPHATE	0.797506	0.865761	1	UNG,HSPA2,ACTN1,DMD,CD46,TCF4,RRAS,SGCD,SLC25A6,GYS1,PLS3,MYL6B,FAP,CDK4,PYGB,HLA-DRB1,HIST1H1E,SLC2A1,SLC2A4,CEP170,HSPA4,RALB,ACTB,TOP1,ATP1A3,HLA-C	0.871006	0.213506	26	154
SEROTONIN AND MELATONIN BIOSYNTHESIS	SEROTONIN AND MELATONIN BIOSYNTHESIS	0.813237	0.876968	1	TCF4,NCOR2,SVIL,CAV1,FLNA,PPFIA4,BAD,VIM,STX1A,NCOA2,CBL,GSN,PXN,TBC1D1,CPLX1,CREBBP,DAPK3,APP,ERCC2,HSPA4,PPFIA1,UNC13B,TUBA1A,CSNK2A1,BAG1,TMF1,EGFR,ACTG1,YWHAQ,RAF1,ARHGEF2,LNPEP,YWHAH,EEF1A1,BSG,NCOA1,MAP3K5,KDM1A,TGFB1I1,GP1BB,RELA	0.858305	0.214873	41	132
SEROTONIN DEGRADATION	SEROTONIN DEGRADATION	0.815107	0.876968	1	HSPA2,TUBB8,MYH10,ALDH3A2,RAB35,SLC25A6,MYH11,PRKAA2,TUBB1,NDRG1,ALDH1B1,FAF2,RAB33B,TUBB4B,CSNK1A1,SLC2A4,SULT1A1,TUBB,MME,BPGM,TUBA8,MYH7B,RAB6A,STAG2,LMNA,EGFR,HSPB2,HSPE1,SLC25A5,MYH9,RBL2,CLUH,TUBA4A,EEF1A1,MYH14	0.861291	0.214365	35	138
NAD BIOSYNTHESIS FROM 2-AMINO-3-CARBOXYMUCONATE SEMIALDEHYDE	NAD BIOSYNTHESIS FROM 2-AMINO-3-CARBOXYMUCONATE SEMIALDEHYDE	0.827455	0.886296	-1	ENO3,MTHFD2,SKI,PSMD14,EZR,H2AFX,LCP1,NADSYN1,TPT1,GLUL,FDPS,ADH5,PEPD,PFKFB1,TXN,CNBP,BCR,DMAP1,NTMT1,HSPA1B,PGAM2,GSPT1,EEF2,CCAR1,SF3A2,PYGM,NQO1,AKR1B1,IMPDH2,EEF1A2,APEH,PPP2R5D,SCAF4,CKB,UCHL3,PPP2R5C,PCNA,POR,NME1,HARS,PKM,XRCC5,MIF,RPS2,DARS,XRCC6,CUTC,SLC25A4,BRAF	-0.873624	-0.205893	49	161
PUTRESCINE DEGRADATION III	PUTRESCINE DEGRADATION III	0.831939	0.887156	1	HSPA2,TUBB8,MYH10,ALDH3A2,ENTPD5,RAB35,SLC25A6,MYH11,PRKAA2,HACD2,TUBB1,PTN,NDRG1,ALDH1B1,FAF2,RAB33B,TUBB4B,CSNK1A1,VKORC1,SLC2A4,KCNA4,TUBB,MME,BPGM,TUBA8,TUBA1A,MYH7B,NMRK2,RAB6A,STAG2,GABARAPL2,LMNA,EGFR,HSPB2,HSPE1,SLC25A5,MYH9,RBL2,CLUH,TUBA4A,EEF1A1,CSNK1E,MYH14,VASP	0.864336	0.207677	44	178
TETRAPYRROLE BIOSYNTHESIS II	TETRAPYRROLE BIOSYNTHESIS II	0.861669	0.907474	-1	ENO3,BOLA1,MTHFD2,GCLM,SKI,PSMD14,ZDHHC17,LCP1,NPEPPS,TPT1,FDPS,ADH5,NAE1,PEPD,COPS5,TMSB10,TXN,BCR,SUMO2,TALDO1,HSPA1B	-0.857204	-0.203025	21	154
URIDINE-5'-PHOSPHATE BIOSYNTHESIS	URIDINE-5'-PHOSPHATE BIOSYNTHESIS	0.861773	0.907474	-1	ENO3,SEPHS1,PLA2G12A,MTHFD2,MAN2B1,SKI,EZR,H2AFX,LCP1,TPT1,GLUL,FDPS,MYH6,ADH5,PEPD,PFKFB1,TXN,BCR,GOT1,HSPA1B,ATP2A2,PGAM2,GSPT1,EEF2,PYGM,NQO1,RRM2B,AKR1B1,IMPDH2	-0.85936	-0.202531	29	161
HEME BIOSYNTHESIS FROM UROPORPHYRINOGEN-III I	HEME BIOSYNTHESIS FROM UROPORPHYRINOGEN-III I	0.862289	0.907474	1	HSPA2,SLC25A35,MYH10,TCF4,ISLR,SLC25A6,MYH11,POLR2B,CAMK2B,IMMT,VIM,ALDH1B1,PFKL,THBS3,CUL3,USP22,HGS,CPOX,MME,HSPA4,ACTB,ATP1A3,DLG1,MYH7B,SEC63,MOV10,EGFR,HSPB2,PDIA3,VDAC2,ACTG1,SLC25A5,MYH9	0.843732	0.2051	33	163
CATECHOLAMINE BIOSYNTHESIS	CATECHOLAMINE BIOSYNTHESIS	0.872004	0.91238	1	TCF4,NCOR2,CAV1,FLNA,PPP3CC,SNCA,PPFIA4,BAD,VIM,HNMT,STX1A,NCOA2,CBL,PXN,TBC1D1,CPLX1,COMT,CREBBP,DAPK3,ERCC2,HSPA4,PPFIA1,UNC13B,TUBA1A,CSNK2A1,BAG1,TMF1,EGFR,ACTG1,YWHAQ,RAF1,ARHGEF2,LNPEP,YWHAH,EEF1A1,BSG,NCOA1,MAPK1,MAP3K5,TGFB1I1,GP1BB,RELA	0.836975	0.20701	42	144
ACYL-COA HYDROLYSIS	ACYL-COA HYDROLYSIS	0.874522	0.91238	1	UNG,ACTN1,DMD,RRAS,ITGB3,SLC25A6,GYS1,PLS3,MTOR,CAMK2B,CDK4,PYGB,BAD,RPTOR,HLA-DRB1,RALGAPB,HIST1H1E,SLC2A1,SLC2A4,RICTOR,RALB,RPS6KB2,WDR18,TOP1,ATP1A3,HLA-C,ILK,ARRB1	0.838369	0.207227	28	145
ADENINE AND ADENOSINE SALVAGE I	ADENINE AND ADENOSINE SALVAGE I	0.880062	0.914202	1	HSPA2,TUBB8,RRAS,SLC25A6,MLH1,POLR2B,TUBB1,PYGB,PFKL,HIST1H1E,SLC2A1,TUBB4B,SLC2A4,CEP170,APP,TUBB,HSPA4,RALB,BPGM,DHRS11,ACTB,VDAC1,TOP1,TUBA8,TUBA1A,HLA-C,PRKAA1,LMNA,MOV10,GMDS,EGFR,VDAC2,ACTG1,SLC25A5,ACTA2,CUL7,RBL2,TSPO,LAMC1,TUBA4A,EEF1A1,FUS	0.839744	0.202878	42	171
GLYCOLYSIS I	GLYCOLYSIS I	0.893694	0.924379	1	HSPA2,HBB,IVNS1ABP,FYN,MYH10,FLNA,SLC25A6,MYH11,PRKAA2,NRP1,MTOR,COL5A1,RPTOR,LSM3,NFIX,PXN,PFKL,TUBB4B,HK1,RHOA,DYNC1H1,ACTB,VDAC1,TUBA8,TUBA1A,COL5A3,UPF2,EPM2A,VDAC2,ACTG1,SLC25A5,MYH9,YWHAQ,ACTA2,TUBA4A,HDAC3,EEF1A1,MYH14,NMD3	0.827399	0.201328	39	162
FORMALDEHYDE OXIDATION II (GLUTATHIONE-DEPENDENT)	FORMALDEHYDE OXIDATION II (GLUTATHIONE-DEPENDENT)	0.901404	0.926228	1	UNG,HSPA2,ACTN1,DMD,CD46,TCF4,RRAS,SLC25A6,GYS1,PLS3,MYL6B,HIST1H1B,CDK4,PYGB,GJA1,HLA-DRB1,CD44,HIST1H1E,SLC2A1,STMN1,SLC2A4,APP,DDA1,HSPA4,RALB,BPGM,TOP1,ATP1A3,HLA-C	0.832041	0.200575	29	174
NICOTINE DEGRADATION IV	NICOTINE DEGRADATION IV	0.903169	0.926228	1	SDC2,FMO3,RAP2B,CYP2S1,DBNL,CYB5R3,NT5E,PYGB,CYB5R2,TLN1,FMO4,BCAP31,MLLT4,PTPN11,PSEN1,APP,APOE,HSPA4,PGRMC2,VAMP7,ARRB1,HSPB2,AMZ2,PKN2,PICALM,IQGAP1,UGDH,CKAP5	0.812192	0.205453	28	123
PYRUVATE DECARBOXYLATION TO ACETYL COA	PYRUVATE DECARBOXYLATION TO ACETYL COA	0.914649	0.934027	-1	NEDD8,PSMD14,NPEPPS,ALDOA,PFDN1,DNAJA1,ASB15,PDK4,BCKDHB,TXNRD2,CNBP,ATG101,BCAT2,CDC40,SUMO2,TUBB2B,CSE1L,HSPA1B,PEBP1,PICK1,PSMA3,PGAM2,PPT1,PITRM1,GCSH,TRIM63,OTUB1,PSMC1,EEF1A2,QDPR,ABCE1	-0.834322	-0.195504	31	170
NICOTINE DEGRADATION III	NICOTINE DEGRADATION III	0.930302	0.944901	1	SDC2,FMO3,RAP2B,CYP2S1,DBNL,CYB5R3,NT5E,PYGB,CYB5R2,TLN1,FMO4,BCAP31,MLLT4,PTPN11,PSEN1,APP,APOE,HSPA4,PGRMC2,VAMP7,ARRB1,HSPB2,AMZ2,PKN2,PICALM,IQGAP1,UGDH,CKAP5	0.794089	0.200327	28	126
ARGININE DEGRADATION VI (ARGINASE 2 PATHWAY)	ARGININE DEGRADATION VI (ARGINASE 2 PATHWAY)	0.933139	0.944901	1	HSPA2,TUBB8,RRAS,RRAS2,TUBB1,NMNAT3,GJA1,SSSCA1,FAF2,FLOT1,CUL3,TUBB4B,CSNK1A1,SLC2A4,NSF,CIC,APP,TUBB,SLC35F6,HSPA4,ALDH4A1,ACTB,TMEM165,TUBA8,TUBA1A,KPNB1,PRKAB1,GABARAPL2,RNF2,EGFR,ACTG1,AHNAK2,YWHAH,ACTA2,TUBA4A,EEF1A1,MDC1,CSNK1E,ARF6,FUS	0.804907	0.195438	40	164
SALVAGE PATHWAYS OF PYRIMIDINE DEOXYRIBONUCLEOTIDES	SALVAGE PATHWAYS OF PYRIMIDINE DEOXYRIBONUCLEOTIDES	0.940159	0.948026	1	COL4A2,RRAS,MAMDC2,EXT2,SEMA5B,FCHSD2,CLEC3B,DOCK7,CCDC94,CDK4,PYGB,IMMT,HIST1H1E,SLC2A1,TK2,APP,RALB,ACTB,ATXN3,WDR18,BAG6,TOP1,TUBA1A,HLA-C,UPF2,MOV10,TYK2	0.790779	0.197737	27	134
PROTEIN CITRULLINATION	PROTEIN CITRULLINATION	0.985835	0.989943	-1	RCHY1,TP53RK,NEDD8,CDK2,COPS5,PPP1R13B,SUMO2,MAPK14,HSPA1B,TP53BP1,USP10,CCT2,CCT4,PTEN,OTUB1,NQO1	-0.731009	-0.178752	16	120
4-AMINOBUTYRATE DEGRADATION I	4-AMINOBUTYRATE DEGRADATION I	0.991369	0.991369	-1	RPS15A,CRIPT,RPS13,RPS18,PPP2CA,RPS9,DNAJA1,MAGOH,RPL9,RPS16,RPS7,NCBP2,ADAM23,HSPA1B,RPS4X,GSPT1,EEF2,RPS17,RPLP2,RPS12,CASC3,RPS3,NRAS,RPS20,ETF1,RPS24,ALDH5A1,RPL23,RPS27,RPSA,PPP2R2A,RPS21,RPS15,SRP72,PPP2R1A,GSPT2,SMG9,ABAT,SRP9,RPS2,RPS29,RPS5,RPLP0	-0.749813	-0.175702	43	170
