# Supplementary material for: Multi-Omics Profiling of Hypertrophic Cardiomyopathy Reveals Altered Mechanisms in Mitochondrial Dynamics and Excitation–Contraction Coupling
Source: Int J Mol Sci. 2023 Mar 1;24(5):4724. doi: 10.3390/ijms24054724 (PMC10002553; doi:10.3390/ijms24054724)
Supplement: Supplementary file 1 [file ijms-24-04724-s001.zip › Supp_Table_S10.xlsx]

## Sheet: (A) hiPSC-CM heatmap phos-sites
FEATURE	WT_319	WT_320	WT_325	WT_327	WT_331	WT_404	WT_414	R403Q_319	R403Q_320	R403Q_325	R403Q_327	R403Q_331	R403Q_404	R403Q_414	GENE	PROTEIN	UNIPROT	MAXFC	P.VALUE	ADJ.P.VAL	LOGFC	FASTA_HEADERS	UNIPROT_FUNCTION	UNIPROT_CELLULAR_LOCATION	UNIPROT_DISEASE	GO_BIOLOGICAL_PROCESS	GO_MOLECULAR_FUNCTION	GO_CELLULAR_COMPONENT	GO_ID	REACTOMEID	KEGG_ID	PROTEINS	LOCALIZATION PROBABILITY	AMINO ACID	PEPTIDE SEQUENCE	WT_319.1	WT_320.1	WT_325.1	WT_327.1	WT_331.1	WT_404.1	WT_414.1	R403Q_319.1	R403Q_320.1	R403Q_325.1	R403Q_327.1	R403Q_331.1	R403Q_404.1	R403Q_414.1
FLNC_Q14315_S2233.1	-0.878985	-0.647163	-0.706161	-1.00403	-0.961983	-0.962566	-1.36941	1.30464	0.995925	0.817241	1.19038	0.683375	1.03854	0.5002	FLNC	Filamin-C	Q14315	1.10672	9.50398e-07	0.00108489	1.37305	sp|Q14315|FLNC_HUMAN Filamin-C OS=Homo sapiens OX=9606 GN=FLNC PE=1 SV=3	FUNCTION: Muscle-specific filamin, which plays a central role in muscle cells, probably by functioning as a large actin-cross-linking protein. May be involved in reorganizing the actin cytoskeleton in response to signaling events, and may also display structural functions at the Z lines in muscle cells. Critical for normal myogenesis and for maintaining the structural integrity of the muscle fibe…	SUBCELLULAR LOCATION: Cytoplasm {ECO:0000269|PubMed:11038172, ECO:0000269|PubMed:25351925}. Membrane {ECO:0000269|PubMed:11038172}; Peripheral membrane protein {ECO:0000269|PubMed:11038172}. Cytoplasm, cytoskeleton {ECO:0000269|PubMed:11038172}. Cytoplasm, myofibril, sarcomere, Z line {ECO:0000269|PubMed:11038172}. Note=A small amount localizes at membranes. In striated muscle cells, it predomina…	DISEASE: Myopathy, myofibrillar, 5 (MFM5) [MIM:609524]: A form of myofibrillar myopathy, a group of chronic neuromuscular disorders characterized at ultrastructural level by disintegration of the sarcomeric Z disk and myofibrils, and replacement of the normal myofibrillar markings by small dense granules, or larger hyaline masses, or amorphous material. MFM5 is characterized by onset in adulthood…	cell junction assembly [GO:0034329]; muscle fiber development [GO:0048747]	actin binding [GO:0003779]; ankyrin binding [GO:0030506]; cytoskeletal protein binding [GO:0008092]; identical protein binding [GO:0042802]	costamere [GO:0043034]; cytoplasm [GO:0005737]; cytoskeleton [GO:0005856]; cytosol [GO:0005829]; focal adhesion [GO:0005925]; plasma membrane [GO:0005886]; sarcolemma [GO:0042383]; sarcoplasm [GO:0016528]; Z disc [GO:0030018]	GO:0003779; GO:0005737; GO:0005829; GO:0005856; GO:0005886; GO:0005925; GO:0008092; GO:0016528; GO:0030018; GO:0030506; GO:0034329; GO:0042383; GO:0042802; GO:0043034; GO:0048747	R-HSA-446353;	hsa:2318;	Q14315	0.991846	S2233	FPAVFGDFLGRERLGSFGSITRQQEGEASSQ	12.9061	13.0766	13.0332	12.814	12.845	12.8445	12.5451	14.513	14.2858	14.1543	14.4289	14.0558	14.3172	13.921
FLNC_Q14315_S2236.1	-0.878985	-0.647163	-0.706161	-1.00403	-0.961983	-0.962566	-1.36941	1.30464	0.995925	0.817241	1.19038	0.683375	1.03854	0.5002	FLNC	Filamin-C	Q14315	1.10672	9.50398e-07	0.00108489	1.37305	sp|Q14315|FLNC_HUMAN Filamin-C OS=Homo sapiens OX=9606 GN=FLNC PE=1 SV=3	FUNCTION: Muscle-specific filamin, which plays a central role in muscle cells, probably by functioning as a large actin-cross-linking protein. May be involved in reorganizing the actin cytoskeleton in response to signaling events, and may also display structural functions at the Z lines in muscle cells. Critical for normal myogenesis and for maintaining the structural integrity of the muscle fibe…	SUBCELLULAR LOCATION: Cytoplasm {ECO:0000269|PubMed:11038172, ECO:0000269|PubMed:25351925}. Membrane {ECO:0000269|PubMed:11038172}; Peripheral membrane protein {ECO:0000269|PubMed:11038172}. Cytoplasm, cytoskeleton {ECO:0000269|PubMed:11038172}. Cytoplasm, myofibril, sarcomere, Z line {ECO:0000269|PubMed:11038172}. Note=A small amount localizes at membranes. In striated muscle cells, it predomina…	DISEASE: Myopathy, myofibrillar, 5 (MFM5) [MIM:609524]: A form of myofibrillar myopathy, a group of chronic neuromuscular disorders characterized at ultrastructural level by disintegration of the sarcomeric Z disk and myofibrils, and replacement of the normal myofibrillar markings by small dense granules, or larger hyaline masses, or amorphous material. MFM5 is characterized by onset in adulthood…	cell junction assembly [GO:0034329]; muscle fiber development [GO:0048747]	actin binding [GO:0003779]; ankyrin binding [GO:0030506]; cytoskeletal protein binding [GO:0008092]; identical protein binding [GO:0042802]	costamere [GO:0043034]; cytoplasm [GO:0005737]; cytoskeleton [GO:0005856]; cytosol [GO:0005829]; focal adhesion [GO:0005925]; plasma membrane [GO:0005886]; sarcolemma [GO:0042383]; sarcoplasm [GO:0016528]; Z disc [GO:0030018]	GO:0003779; GO:0005737; GO:0005829; GO:0005856; GO:0005886; GO:0005925; GO:0008092; GO:0016528; GO:0030018; GO:0030506; GO:0034329; GO:0042383; GO:0042802; GO:0043034; GO:0048747	R-HSA-446353;	hsa:2318;	Q14315	0.948306	S2236	VFGDFLGRERLGSFGSITRQQEGEASSQDMT	12.9061	13.0766	13.0332	12.814	12.845	12.8445	12.5451	14.513	14.2858	14.1543	14.4289	14.0558	14.3172	13.921
JPH2_Q9BR39_S241	-1.17943	-1.357	-1.28364	-0.255887	-0.813196	-0.587469	-0.49819	0.572256	0.0516356	1.32727	0.535551	1.08151	1.62494	0.781656	JPH2	Junctophilin-2	Q9BR39	1.14772	1.98622e-05	0.00689726	1.81795	sp|Q9BR39|JPH2_HUMAN Junctophilin-2 OS=Homo sapiens OX=9606 GN=JPH2 PE=1 SV=2	FUNCTION: [Junctophilin-2]: Membrane-binding protein that provides a structural bridge between the plasma membrane and the sarcoplasmic reticulum and is required for normal excitation-contraction coupling in cardiomyocytes (PubMed:20095964). Provides a structural foundation for functional cross-talk between the cell surface and intracellular Ca(2+) release channels by maintaining the 12-15 nm gap…	SUBCELLULAR LOCATION: [Junctophilin-2]: Cell membrane {ECO:0000250|UniProtKB:Q9ET78}; Peripheral membrane protein {ECO:0000250|UniProtKB:Q9ET78}. Sarcoplasmic reticulum membrane {ECO:0000250|UniProtKB:Q9ET78}; Single-pass type IV membrane protein {ECO:0000250|UniProtKB:Q9ET78}. Endoplasmic reticulum membrane {ECO:0000250|UniProtKB:Q9ET78}; Single-pass type IV membrane protein {ECO:0000250|UniProt…	DISEASE: Cardiomyopathy, familial hypertrophic 17 (CMH17) [MIM:613873]: A hereditary heart disorder characterized by ventricular hypertrophy, which is usually asymmetric and often involves the interventricular septum. The symptoms include dyspnea, syncope, collapse, palpitations, and chest pain. They can be readily provoked by exercise. The disorder has inter- and intrafamilial variability rangin…	calcium ion homeostasis [GO:0055074]; calcium ion transport into cytosol [GO:0060402]; multicellular organism development [GO:0007275]; negative regulation of transcription, DNA-templated [GO:0045892]; negative regulation of transcription by RNA polymerase II [GO:0000122]; positive regulation of ryanodine-sensitive calcium-release channel activity [GO:0060316]; regulation of cardiac muscle tissue…	core promoter sequence-specific DNA binding [GO:0001046]; DNA binding [GO:0003677]; DNA-binding transcription repressor activity, RNA polymerase II-specific [GO:0001227]; phosphatidic acid binding [GO:0070300]; phosphatidylinositol-3,4,5-trisphosphate binding [GO:0005547]; phosphatidylinositol-3,5-bisphosphate binding [GO:0080025]; phosphatidylinositol-3-phosphate binding [GO:0032266]; phosphatid…	endoplasmic reticulum membrane [GO:0005789]; integral component of membrane [GO:0016021]; junctional membrane complex [GO:0030314]; junctional sarcoplasmic reticulum membrane [GO:0014701]; nucleus [GO:0005634]; plasma membrane [GO:0005886]; sarcoplasmic reticulum [GO:0016529]; Z disc [GO:0030018]	GO:0000122; GO:0001046; GO:0001227; GO:0001786; GO:0003677; GO:0005546; GO:0005547; GO:0005634; GO:0005789; GO:0005886; GO:0007275; GO:0010314; GO:0014701; GO:0016021; GO:0016529; GO:0030018; GO:0030314; GO:0032266; GO:0045892; GO:0055024; GO:0055074; GO:0060314; GO:0060316; GO:0060402; GO:0070273; GO:0070300; GO:0080025		hsa:57158;	Q9BR39	0.999999	S241	LLGKLRRAESRTSVGSQRSRVSFLKSDLSSG	11.9594	11.7703	11.8484	12.9429	12.3494	12.5898	12.6849	13.8248	13.2704	14.6289	13.7857	14.3672	14.9459	14.0478
MYBPC3_Q14896_S424.1	0.814902	0.80402	1.42198	0.907095	1.01404	0.703686	0.738448	-0.759625	-0.590146	-1.34845	-0.625887	-0.986132	-0.5592	-1.53472	MYBPC3	Myosin-binding protein C, cardiac-type	Q14896	1.10066	2.2137e-05	0.00689726	-1.1776	sp|Q14896|MYPC3_HUMAN Myosin-binding protein C, cardiac-type OS=Homo sapiens OX=9606 GN=MYBPC3 PE=1 SV=4	FUNCTION: Thick filament-associated protein located in the crossbridge region of vertebrate striated muscle a bands. In vitro it binds MHC, F-actin and native thin filaments, and modifies the activity of actin-activated myosin ATPase. It may modulate muscle contraction or may play a more structural role.		DISEASE: Cardiomyopathy, familial hypertrophic 4 (CMH4) [MIM:115197]: A hereditary heart disorder characterized by ventricular hypertrophy, which is usually asymmetric and often involves the interventricular septum. The symptoms include dyspnea, syncope, collapse, palpitations, and chest pain. They can be readily provoked by exercise. The disorder has inter- and intrafamilial variability ranging …	cardiac muscle contraction [GO:0060048]; cell adhesion [GO:0007155]; heart morphogenesis [GO:0003007]; muscle filament sliding [GO:0030049]; positive regulation of ATPase activity [GO:0032781]; regulation of muscle filament sliding [GO:0032971]; regulation of striated muscle contraction [GO:0006942]; ventricular cardiac muscle tissue morphogenesis [GO:0055010]	actin binding [GO:0003779]; ATPase activator activity [GO:0001671]; identical protein binding [GO:0042802]; metal ion binding [GO:0046872]; myosin binding [GO:0017022]; myosin heavy chain binding [GO:0032036]; structural constituent of muscle [GO:0008307]; titin binding [GO:0031432]	A band [GO:0031672]; cardiac myofibril [GO:0097512]; cytosol [GO:0005829]; C zone [GO:0014705]; sarcomere [GO:0030017]; striated muscle myosin thick filament [GO:0005863]	GO:0001671; GO:0003007; GO:0003779; GO:0005829; GO:0005863; GO:0006942; GO:0007155; GO:0008307; GO:0014705; GO:0017022; GO:0030017; GO:0030049; GO:0031432; GO:0031672; GO:0032036; GO:0032781; GO:0032971; GO:0042802; GO:0046872; GO:0055010; GO:0060048; GO:0097512	R-HSA-390522;	hsa:4607;	Q14896	0.957438	S424	KYIFESIGAKRTLTISQCSLADDAAYQCVVG	12.8126	12.8056	13.2033	12.8719	12.9408	12.741	12.7634	11.7993	11.9083	11.4203	11.8853	11.6535	11.9283	11.3004
MYBPC3_Q14896_S427.1	0.814902	0.80402	1.42198	0.907095	1.01404	0.703686	0.738448	-0.759625	-0.590146	-1.34845	-0.625887	-0.986132	-0.5592	-1.53472	MYBPC3	Myosin-binding protein C, cardiac-type	Q14896	1.10066	2.2137e-05	0.00689726	-1.1776	sp|Q14896|MYPC3_HUMAN Myosin-binding protein C, cardiac-type OS=Homo sapiens OX=9606 GN=MYBPC3 PE=1 SV=4	FUNCTION: Thick filament-associated protein located in the crossbridge region of vertebrate striated muscle a bands. In vitro it binds MHC, F-actin and native thin filaments, and modifies the activity of actin-activated myosin ATPase. It may modulate muscle contraction or may play a more structural role.		DISEASE: Cardiomyopathy, familial hypertrophic 4 (CMH4) [MIM:115197]: A hereditary heart disorder characterized by ventricular hypertrophy, which is usually asymmetric and often involves the interventricular septum. The symptoms include dyspnea, syncope, collapse, palpitations, and chest pain. They can be readily provoked by exercise. The disorder has inter- and intrafamilial variability ranging …	cardiac muscle contraction [GO:0060048]; cell adhesion [GO:0007155]; heart morphogenesis [GO:0003007]; muscle filament sliding [GO:0030049]; positive regulation of ATPase activity [GO:0032781]; regulation of muscle filament sliding [GO:0032971]; regulation of striated muscle contraction [GO:0006942]; ventricular cardiac muscle tissue morphogenesis [GO:0055010]	actin binding [GO:0003779]; ATPase activator activity [GO:0001671]; identical protein binding [GO:0042802]; metal ion binding [GO:0046872]; myosin binding [GO:0017022]; myosin heavy chain binding [GO:0032036]; structural constituent of muscle [GO:0008307]; titin binding [GO:0031432]	A band [GO:0031672]; cardiac myofibril [GO:0097512]; cytosol [GO:0005829]; C zone [GO:0014705]; sarcomere [GO:0030017]; striated muscle myosin thick filament [GO:0005863]	GO:0001671; GO:0003007; GO:0003779; GO:0005829; GO:0005863; GO:0006942; GO:0007155; GO:0008307; GO:0014705; GO:0017022; GO:0030017; GO:0030049; GO:0031432; GO:0031672; GO:0032036; GO:0032781; GO:0032971; GO:0042802; GO:0046872; GO:0055010; GO:0060048; GO:0097512	R-HSA-390522;	hsa:4607;	Q14896	0.999284	S427	FESIGAKRTLTISQCSLADDAAYQCVVGGEK	12.8126	12.8056	13.2033	12.8719	12.9408	12.741	12.7634	11.7993	11.9083	11.4203	11.8853	11.6535	11.9283	11.3004
RYR2_Q92736_S2814	0.257207	-1.2992	-1.22707	-0.335765	-0.0117589	-0.615271	-1.68259	1.37693	-0.215117	0.939665	0.486217	1.74804	0.547203	0.0315169	RYR2	Ryanodine receptor 2	Q92736	1.12	6.96881e-05	0.0108564	1.01012	sp|Q92736|RYR2_HUMAN Ryanodine receptor 2 OS=Homo sapiens OX=9606 GN=RYR2 PE=1 SV=3	FUNCTION: Calcium channel that mediates the release of Ca(2+) from the sarcoplasmic reticulum into the cytoplasm and thereby plays a key role in triggering cardiac muscle contraction. Aberrant channel activation can lead to cardiac arrhythmia. In cardiac myocytes, calcium release is triggered by increased Ca(2+) levels due to activation of the L-type calcium channel CACNA1C. The calcium channel a…	SUBCELLULAR LOCATION: Sarcoplasmic reticulum membrane {ECO:0000269|PubMed:10830164}; Multi-pass membrane protein {ECO:0000269|PubMed:10830164}. Membrane {ECO:0000305|PubMed:10830164}; Multi-pass membrane protein {ECO:0000305|PubMed:10830164}. Sarcoplasmic reticulum {ECO:0000250|UniProtKB:P30957}. Note=The number of predicted transmembrane domains varies between orthologs, but both N-terminus and …	DISEASE: Arrhythmogenic right ventricular dysplasia, familial, 2 (ARVD2) [MIM:600996]: A congenital heart disease characterized by infiltration of adipose and fibrous tissue into the right ventricle and loss of myocardial cells, resulting in ventricular and supraventricular arrhythmias. {ECO:0000269|PubMed:11159936}. Note=The disease is caused by variants affecting the gene represented in this en…	calcium ion transport [GO:0006816]; calcium ion transport into cytosol [GO:0060402]; calcium-mediated signaling [GO:0019722]; calcium-mediated signaling using intracellular calcium source [GO:0035584]; cardiac muscle contraction [GO:0060048]; cardiac muscle hypertrophy [GO:0003300]; cell communication by electrical coupling involved in cardiac conduction [GO:0086064]; cellular calcium ion homeost…	calcium channel activity [GO:0005262]; calcium-induced calcium release activity [GO:0048763]; calcium ion binding [GO:0005509]; calcium-release channel activity [GO:0015278]; calmodulin binding [GO:0005516]; enzyme binding [GO:0019899]; identical protein binding [GO:0042802]; ion channel binding [GO:0044325]; protein kinase A catalytic subunit binding [GO:0034236]; protein kinase A regulatory sub…	calcium channel complex [GO:0034704]; cytoplasmic vesicle membrane [GO:0030659]; junctional sarcoplasmic reticulum membrane [GO:0014701]; membrane [GO:0016020]; plasma membrane [GO:0005886]; protein-containing complex [GO:0032991]; sarcolemma [GO:0042383]; sarcoplasmic reticulum [GO:0016529]; sarcoplasmic reticulum membrane [GO:0033017]; smooth endoplasmic reticulum [GO:0005790]; Z disc [GO:00300…	GO:0001666; GO:0002027; GO:0003143; GO:0003220; GO:0003300; GO:0005219; GO:0005262; GO:0005509; GO:0005513; GO:0005516; GO:0005790; GO:0005886; GO:0006816; GO:0006874; GO:0010460; GO:0010881; GO:0010882; GO:0014701; GO:0014808; GO:0014850; GO:0015278; GO:0016020; GO:0016529; GO:0019722; GO:0019899; GO:0030018; GO:0030659; GO:0031000; GO:0032991; GO:0033017; GO:0034220; GO:0034236; GO:0034237; GO:…	R-HSA-2672351;R-HSA-5578775;	hsa:6262;	Q92736	0.999935	S2814	ALYNRTRRISQTSQVSVDAAHGYSPRAIDMS	9.10778	7.98811	8.04	8.6812	8.91429	8.48013	7.71231	9.9133	8.76799	9.59873	9.27252	10.1803	9.3164	8.94542
PLN_P26678_S16.1	-1.03946	-1.15815	-0.578319	-0.769719	-0.939182	0.0279158	-0.914108	-0.84251	0.408517	1.27314	0.913381	0.914135	1.58518	1.11918	PLN	Cardiac phospholamban	P26678	1.09378	8.18116e-05	0.0115117	1.24004	sp|P26678|PPLA_HUMAN Cardiac phospholamban OS=Homo sapiens OX=9606 GN=PLN PE=1 SV=1	FUNCTION: Reversibly inhibits the activity of ATP2A2 in cardiac sarcoplasmic reticulum by decreasing the apparent affinity of the ATPase for Ca(2+) (PubMed:28890335). Modulates the contractility of the heart muscle in response to physiological stimuli via its effects on ATP2A2. Modulates calcium re-uptake during muscle relaxation and plays an important role in calcium homeostasis in the heart mus…	SUBCELLULAR LOCATION: Endoplasmic reticulum membrane {ECO:0000269|PubMed:17241641}; Single-pass membrane protein {ECO:0000255}. Sarcoplasmic reticulum membrane {ECO:0000269|PubMed:12804600, ECO:0000269|PubMed:15598648, ECO:0000269|PubMed:22427649}; Single-pass membrane protein {ECO:0000255}. Mitochondrion membrane {ECO:0000250|UniProtKB:A4IFH6}; Single-pass membrane protein {ECO:0000255}. Membran…	DISEASE: Cardiomyopathy, dilated 1P (CMD1P) [MIM:609909]: A disorder characterized by ventricular dilation and impaired systolic function, resulting in congestive heart failure and arrhythmia. Patients are at risk of premature death. {ECO:0000269|PubMed:12610310, ECO:0000269|PubMed:16432188, ECO:0000269|PubMed:22137083, ECO:0000269|PubMed:22427649, ECO:0000269|PubMed:22707725}. Note=The disease i…	adenylate cyclase-activating adrenergic receptor signaling pathway involved in heart process [GO:0086023]; blood circulation [GO:0008015]; calcium ion transport [GO:0006816]; cardiac muscle tissue development [GO:0048738]; negative regulation of ATPase activity [GO:0032780]; negative regulation of ATPase-coupled calcium transmembrane transporter activity [GO:1901895]; negative regulation of calci…	ATPase binding [GO:0051117]; ATPase inhibitor activity [GO:0042030]; enzyme inhibitor activity [GO:0004857]; identical protein binding [GO:0042802]; protein homodimerization activity [GO:0042803]	calcium ion-transporting ATPase complex [GO:0090534]; endoplasmic reticulum [GO:0005783]; membrane [GO:0016020]; mitochondrial membrane [GO:0031966]; mitochondrion [GO:0005739]; perinuclear region of cytoplasm [GO:0048471]; sarcoplasmic reticulum membrane [GO:0033017]; vesicle [GO:0031982]	GO:0002026; GO:0004857; GO:0005739; GO:0005783; GO:0006816; GO:0007219; GO:0008015; GO:0008016; GO:0010043; GO:0010459; GO:0010881; GO:0016020; GO:0031966; GO:0031982; GO:0032780; GO:0032868; GO:0033017; GO:0033574; GO:0042030; GO:0042802; GO:0042803; GO:0043086; GO:0048471; GO:0048738; GO:0051117; GO:0051480; GO:0051924; GO:0051926; GO:0055119; GO:0060314; GO:0086004; GO:0086023; GO:0086036; GO:…	R-HSA-5578775;R-HSA-936837;	hsa:5350;	P26678	1	S16	MEKVQYLTRSAIRRASTIEMPQQARQKLQNL	13.0027	12.9068	13.3754	13.2207	13.0838	13.8653	13.104	13.1619	14.1728	14.8715	14.5808	14.5814	15.1236	14.7471
PLN_P26678_T17.1	-1.03946	-1.15815	-0.578319	-0.769719	-0.939182	0.0279158	-0.914108	-0.84251	0.408517	1.27314	0.913381	0.914135	1.58518	1.11918	PLN	Cardiac phospholamban	P26678	1.09378	8.18116e-05	0.0115117	1.24004	sp|P26678|PPLA_HUMAN Cardiac phospholamban OS=Homo sapiens OX=9606 GN=PLN PE=1 SV=1	FUNCTION: Reversibly inhibits the activity of ATP2A2 in cardiac sarcoplasmic reticulum by decreasing the apparent affinity of the ATPase for Ca(2+) (PubMed:28890335). Modulates the contractility of the heart muscle in response to physiological stimuli via its effects on ATP2A2. Modulates calcium re-uptake during muscle relaxation and plays an important role in calcium homeostasis in the heart mus…	SUBCELLULAR LOCATION: Endoplasmic reticulum membrane {ECO:0000269|PubMed:17241641}; Single-pass membrane protein {ECO:0000255}. Sarcoplasmic reticulum membrane {ECO:0000269|PubMed:12804600, ECO:0000269|PubMed:15598648, ECO:0000269|PubMed:22427649}; Single-pass membrane protein {ECO:0000255}. Mitochondrion membrane {ECO:0000250|UniProtKB:A4IFH6}; Single-pass membrane protein {ECO:0000255}. Membran…	DISEASE: Cardiomyopathy, dilated 1P (CMD1P) [MIM:609909]: A disorder characterized by ventricular dilation and impaired systolic function, resulting in congestive heart failure and arrhythmia. Patients are at risk of premature death. {ECO:0000269|PubMed:12610310, ECO:0000269|PubMed:16432188, ECO:0000269|PubMed:22137083, ECO:0000269|PubMed:22427649, ECO:0000269|PubMed:22707725}. Note=The disease i…	adenylate cyclase-activating adrenergic receptor signaling pathway involved in heart process [GO:0086023]; blood circulation [GO:0008015]; calcium ion transport [GO:0006816]; cardiac muscle tissue development [GO:0048738]; negative regulation of ATPase activity [GO:0032780]; negative regulation of ATPase-coupled calcium transmembrane transporter activity [GO:1901895]; negative regulation of calci…	ATPase binding [GO:0051117]; ATPase inhibitor activity [GO:0042030]; enzyme inhibitor activity [GO:0004857]; identical protein binding [GO:0042802]; protein homodimerization activity [GO:0042803]	calcium ion-transporting ATPase complex [GO:0090534]; endoplasmic reticulum [GO:0005783]; membrane [GO:0016020]; mitochondrial membrane [GO:0031966]; mitochondrion [GO:0005739]; perinuclear region of cytoplasm [GO:0048471]; sarcoplasmic reticulum membrane [GO:0033017]; vesicle [GO:0031982]	GO:0002026; GO:0004857; GO:0005739; GO:0005783; GO:0006816; GO:0007219; GO:0008015; GO:0008016; GO:0010043; GO:0010459; GO:0010881; GO:0016020; GO:0031966; GO:0031982; GO:0032780; GO:0032868; GO:0033017; GO:0033574; GO:0042030; GO:0042802; GO:0042803; GO:0043086; GO:0048471; GO:0048738; GO:0051117; GO:0051480; GO:0051924; GO:0051926; GO:0055119; GO:0060314; GO:0086004; GO:0086023; GO:0086036; GO:…	R-HSA-5578775;R-HSA-936837;	hsa:5350;	P26678	1	T17	EKVQYLTRSAIRRASTIEMPQQARQKLQNLF	13.0027	12.9068	13.3754	13.2207	13.0838	13.8653	13.104	13.1619	14.1728	14.8715	14.5808	14.5814	15.1236	14.7471
PPP1R12B_O60237_S842	-1.42128	-1.61843	-0.518708	-1.36055	-0.385557	0.159451	-0.0858605	0.795284	0.10868	1.076	-0.242832	0.879681	1.3677	1.24642	PPP1R12B	Protein phosphatase 1 regulatory subunit 12B	O60237	1.06104	0.00029117	0.023237	0.636614	sp|O60237|MYPT2_HUMAN Protein phosphatase 1 regulatory subunit 12B OS=Homo sapiens OX=9606 GN=PPP1R12B PE=1 SV=2	FUNCTION: Regulates myosin phosphatase activity. Augments Ca(2+) sensitivity of the contractile apparatus. {ECO:0000269|PubMed:11067852, ECO:0000269|PubMed:9570949}.	SUBCELLULAR LOCATION: Cytoplasm, cytoskeleton {ECO:0000269|PubMed:12923170}. Cytoplasm, cytoskeleton, stress fiber {ECO:0000269|PubMed:12923170}. Note=Along actomyosin filaments. {ECO:0000269|PubMed:12923170}.		G2/M transition of mitotic cell cycle [GO:0000086]; regulation of muscle contraction [GO:0006937]; signal transduction [GO:0007165]	enzyme activator activity [GO:0008047]; enzyme inhibitor activity [GO:0004857]; phosphatase regulator activity [GO:0019208]; protein kinase binding [GO:0019901]	A band [GO:0031672]; cytoplasm [GO:0005737]; cytoskeleton [GO:0005856]; cytosol [GO:0005829]; nucleoplasm [GO:0005654]; Z disc [GO:0030018]	GO:0000086; GO:0004857; GO:0005654; GO:0005737; GO:0005829; GO:0005856; GO:0006937; GO:0007165; GO:0008047; GO:0019208; GO:0019901; GO:0030018; GO:0031672	R-HSA-2565942 [O60237-4];R-HSA-5625740;R-HSA-5625900;R-HSA-5627117;R-HSA-5627123;	hsa:4660;	O60237	0.971226	S842	KETWHERLSRLESGGSNPTTSDSYGDRASAR	10.142	10.058	10.5265	10.1679	10.5832	10.8153	10.7108	11.0862	10.7937	11.2057	10.644	11.1221	11.33	11.2783
LMOD2_Q6P5Q4_S392.1	-0.753844	0.0627006	-0.815578	-1.34123	-0.921015	-1.31978	-0.850915	0.991834	0.0863813	1.79172	0.605782	0.625757	0.912648	0.925545	LMOD2	Leiomodin-2	Q6P5Q4	1.08059	0.000341548	0.0252514	1.0032	sp|Q6P5Q4|LMOD2_HUMAN Leiomodin-2 OS=Homo sapiens OX=9606 GN=LMOD2 PE=1 SV=2	FUNCTION: Mediates nucleation of actin filaments and thereby promotes actin polymerization (PubMed:18403713, PubMed:26370058, PubMed:25250574, PubMed:26417072). Plays a role in the regulation of actin filament length (By similarity). Required for normal sarcomere organization in the heart, and for normal heart function (PubMed:18403713). {ECO:0000250|UniProtKB:Q3UHZ5, ECO:0000269|PubMed:18403713,…	SUBCELLULAR LOCATION: Cytoplasm, myofibril, sarcomere {ECO:0000269|PubMed:18403713, ECO:0000269|PubMed:20685966, ECO:0000269|PubMed:26370058}. Cytoplasm, myofibril {ECO:0000269|PubMed:20685966}. Cytoplasm, myofibril, sarcomere, M line {ECO:0000269|PubMed:18403713, ECO:0000269|PubMed:20685966}. Cytoplasm, cytoskeleton {ECO:0000269|PubMed:26370058}. Note=Colocalizes with actin filaments in sarcomer…		actin filament organization [GO:0007015]; actin filament polymerization [GO:0030041]; actin nucleation [GO:0045010]; muscle contraction [GO:0006936]; myofibril assembly [GO:0030239]; pointed-end actin filament capping [GO:0051694]; positive regulation of actin filament polymerization [GO:0030838]; sarcomere organization [GO:0045214]	actin binding [GO:0003779]; actin monomer binding [GO:0003785]; tropomyosin binding [GO:0005523]	actin filament [GO:0005884]; cytoskeleton [GO:0005856]; M band [GO:0031430]; myofibril [GO:0030016]; sarcomere [GO:0030017]; striated muscle thin filament [GO:0005865]	GO:0003779; GO:0003785; GO:0005523; GO:0005856; GO:0005865; GO:0005884; GO:0006936; GO:0007015; GO:0030016; GO:0030017; GO:0030041; GO:0030239; GO:0030838; GO:0031430; GO:0045010; GO:0045214; GO:0051694		hsa:442721;	Q6P5Q4	0.99861	S392	TKVWQRGTPSSSPYVSPRHSPWSSPKLPKKV	12.5045	12.9872	12.468	12.1573	12.4057	12.17	12.4472	13.5365	13.0012	14.0093	13.3083	13.3201	13.4897	13.4973
FLNC_Q14315_S2233	-0.845128	-0.781472	0.0554246	-0.496207	-0.869526	-0.886421	-1.62393	1.34534	-0.340125	1.02553	1.39257	0.643768	1.38411	-0.00392326	FLNC	Filamin-C	Q14315	1.06242	0.00036522	0.025695	0.799937	sp|Q14315|FLNC_HUMAN Filamin-C OS=Homo sapiens OX=9606 GN=FLNC PE=1 SV=3	FUNCTION: Muscle-specific filamin, which plays a central role in muscle cells, probably by functioning as a large actin-cross-linking protein. May be involved in reorganizing the actin cytoskeleton in response to signaling events, and may also display structural functions at the Z lines in muscle cells. Critical for normal myogenesis and for maintaining the structural integrity of the muscle fibe…	SUBCELLULAR LOCATION: Cytoplasm {ECO:0000269|PubMed:11038172, ECO:0000269|PubMed:25351925}. Membrane {ECO:0000269|PubMed:11038172}; Peripheral membrane protein {ECO:0000269|PubMed:11038172}. Cytoplasm, cytoskeleton {ECO:0000269|PubMed:11038172}. Cytoplasm, myofibril, sarcomere, Z line {ECO:0000269|PubMed:11038172}. Note=A small amount localizes at membranes. In striated muscle cells, it predomina…	DISEASE: Myopathy, myofibrillar, 5 (MFM5) [MIM:609524]: A form of myofibrillar myopathy, a group of chronic neuromuscular disorders characterized at ultrastructural level by disintegration of the sarcomeric Z disk and myofibrils, and replacement of the normal myofibrillar markings by small dense granules, or larger hyaline masses, or amorphous material. MFM5 is characterized by onset in adulthood…	cell junction assembly [GO:0034329]; muscle fiber development [GO:0048747]	actin binding [GO:0003779]; ankyrin binding [GO:0030506]; cytoskeletal protein binding [GO:0008092]; identical protein binding [GO:0042802]	costamere [GO:0043034]; cytoplasm [GO:0005737]; cytoskeleton [GO:0005856]; cytosol [GO:0005829]; focal adhesion [GO:0005925]; plasma membrane [GO:0005886]; sarcolemma [GO:0042383]; sarcoplasm [GO:0016528]; Z disc [GO:0030018]	GO:0003779; GO:0005737; GO:0005829; GO:0005856; GO:0005886; GO:0005925; GO:0008092; GO:0016528; GO:0030018; GO:0030506; GO:0034329; GO:0042383; GO:0042802; GO:0043034; GO:0048747	R-HSA-446353;	hsa:2318;	Q14315	0.991846	S2233	FPAVFGDFLGRERLGSFGSITRQQEGEASSQ	12.781	12.8137	13.2439	12.9604	12.7685	12.7598	12.3807	13.9069	13.0406	13.7425	13.9311	13.5463	13.9268	13.2134
TTN_Q8WZ42_S1418.1	0.524517	1.55417	1.13172	1.12898	1.16386	-0.273232	0.697993	-1.3696	-0.813991	-0.600227	-0.208384	-1.05466	-0.857203	-1.02395	TTN	Titin	Q8WZ42	1.04294	0.000430252	0.0288732	-0.66415	sp|Q8WZ42|TITIN_HUMAN Titin OS=Homo sapiens OX=9606 GN=TTN PE=1 SV=4	FUNCTION: Key component in the assembly and functioning of vertebrate striated muscles. By providing connections at the level of individual microfilaments, it contributes to the fine balance of forces between the two halves of the sarcomere. The size and extensibility of the cross-links are the main determinants of sarcomere extensibility properties of muscle. In non-muscle cells, seems to play a…	SUBCELLULAR LOCATION: Cytoplasm {ECO:0000305|PubMed:16410549}. Nucleus {ECO:0000269|PubMed:16410549}.	DISEASE: Myopathy, myofibrillar, 9, with early respiratory failure (MFM9) [MIM:603689]: An autosomal dominant myopathy characterized by adulthood onset of weakness in proximal, distal, axial and respiratory muscles. Pelvic girdle weakness, foot drop and neck weakness are the main symptoms at onset, but ultimately the weakness usually involves the proximal compartment of both upper and lower limbs…	cardiac muscle contraction [GO:0060048]; cardiac muscle fiber development [GO:0048739]; cardiac muscle hypertrophy [GO:0003300]; cardiac muscle tissue morphogenesis [GO:0055008]; cardiac myofibril assembly [GO:0055003]; detection of muscle stretch [GO:0035995]; mitotic chromosome condensation [GO:0007076]; muscle contraction [GO:0006936]; muscle filament sliding [GO:0030049]; platelet degranulati…	actin filament binding [GO:0051015]; actinin binding [GO:0042805]; ATP binding [GO:0005524]; calcium ion binding [GO:0005509]; calmodulin binding [GO:0005516]; enzyme binding [GO:0019899]; identical protein binding [GO:0042802]; muscle alpha-actinin binding [GO:0051371]; protease binding [GO:0002020]; protein kinase binding [GO:0019901]; protein self-association [GO:0043621]; protein serine/threo…	condensed nuclear chromosome [GO:0000794]; cytosol [GO:0005829]; extracellular exosome [GO:0070062]; extracellular region [GO:0005576]; I band [GO:0031674]; M band [GO:0031430]; striated muscle thin filament [GO:0005865]; Z disc [GO:0030018]	GO:0000794; GO:0002020; GO:0002576; GO:0003300; GO:0004674; GO:0004713; GO:0005509; GO:0005516; GO:0005524; GO:0005576; GO:0005829; GO:0005865; GO:0006936; GO:0006941; GO:0007076; GO:0008307; GO:0010628; GO:0010737; GO:0019899; GO:0019901; GO:0030018; GO:0030049; GO:0030240; GO:0030241; GO:0031430; GO:0031433; GO:0031674; GO:0035995; GO:0042802; GO:0042805; GO:0043621; GO:0045214; GO:0045859; GO:…	R-HSA-114608;R-HSA-390522;	hsa:7273;	Q8WZ42	1	S1418	RSLSPRSVSRSPIRMSPARMSPARMSPARMS	16.0036	16.4074	16.2418	16.2407	16.2544	15.6908	16.0717	15.2609	15.4788	15.5626	15.7163	15.3844	15.4618	15.3965
ROCK1_Q13464_S1105.1	-0.556091	-1.16936	-1.2938	-1.21323	-0.961887	-0.0809778	-0.0315182	0.772938	0.700989	1.23268	-0.796513	1.3829	0.831268	1.18261	ROCK1	Rho-associated protein kinase 1	Q13464	1.0701	0.000495636	0.0303046	0.944627	sp|Q13464|ROCK1_HUMAN Rho-associated protein kinase 1 OS=Homo sapiens OX=9606 GN=ROCK1 PE=1 SV=1	FUNCTION: Protein kinase which is a key regulator of the actin cytoskeleton and cell polarity (PubMed:10436159, PubMed:10652353, PubMed:11018042, PubMed:11283607, PubMed:17158456, PubMed:18573880, PubMed:19131646, PubMed:8617235, PubMed:9722579). Involved in regulation of smooth muscle contraction, actin cytoskeleton organization, stress fiber and focal adhesion formation, neurite retraction, cel…	SUBCELLULAR LOCATION: Cytoplasm {ECO:0000269|PubMed:8617235}. Cytoplasm, cytoskeleton, microtubule organizing center, centrosome, centriole {ECO:0000250|UniProtKB:P70335}. Golgi apparatus membrane {ECO:0000269|PubMed:12773565}; Peripheral membrane protein {ECO:0000269|PubMed:12773565}. Cell projection, bleb {ECO:0000269|PubMed:18694941}. Cytoplasm, cytoskeleton {ECO:0000250|UniProtKB:P70335}. Cel…		actin cytoskeleton organization [GO:0030036]; actomyosin structure organization [GO:0031032]; aortic valve morphogenesis [GO:0003180]; apoptotic process [GO:0006915]; blood vessel diameter maintenance [GO:0097746]; cortical actin cytoskeleton organization [GO:0030866]; embryonic morphogenesis [GO:0048598]; ephrin receptor signaling pathway [GO:0048013]; epithelial to mesenchymal transition [GO:00…	aspartic-type endopeptidase inhibitor activity [GO:0019828]; ATP binding [GO:0005524]; metal ion binding [GO:0046872]; protein kinase activity [GO:0004672]; protein serine/threonine kinase activity [GO:0004674]; protein serine kinase activity [GO:0106310]; protein threonine kinase activity [GO:0106311]; Rho-dependent protein serine/threonine kinase activity [GO:0072518]; small GTPase binding [GO:…	bleb [GO:0032059]; centriole [GO:0005814]; cytoplasm [GO:0005737]; cytoplasmic stress granule [GO:0010494]; cytoskeleton [GO:0005856]; cytosol [GO:0005829]; extracellular region [GO:0005576]; Golgi membrane [GO:0000139]; lamellipodium [GO:0030027]; plasma membrane [GO:0005886]; ruffle [GO:0001726]; secretory granule lumen [GO:0034774]	GO:0000139; GO:0000281; GO:0001726; GO:0001837; GO:0003180; GO:0004672; GO:0004674; GO:0005524; GO:0005576; GO:0005737; GO:0005814; GO:0005829; GO:0005856; GO:0005886; GO:0006468; GO:0006915; GO:0006939; GO:0007159; GO:0007165; GO:0007186; GO:0007249; GO:0007266; GO:0010494; GO:0010506; GO:0010508; GO:0010613; GO:0010628; GO:0016525; GO:0018105; GO:0018107; GO:0019828; GO:0022614; GO:0030027; GO:…	R-HSA-111465;R-HSA-3928662;R-HSA-3928663;R-HSA-416482;R-HSA-416572;R-HSA-4420097;R-HSA-5627117;R-HSA-6798695;R-HSA-9013422;R-HSA-9679191;	hsa:6093;	Q13464	0.823722	S1105	LRAKLLDLSDSTSVASFPSADETDGNLPESR	13.6009	13.2188	13.1413	13.1915	13.348	13.8969	13.9277	14.4288	14.384	14.7153	13.4511	14.8089	14.4652	14.6841
LMOD2_Q6P5Q4_S392	-0.672297	-0.384446	-0.259986	-1.29578	-0.946256	-1.18749	-0.512806	1.0395	-0.459583	1.91569	0.0733692	1.42406	0.253082	1.01294	LMOD2	Leiomodin-2	Q6P5Q4	1.08054	0.000769702	0.0353581	0.84409	sp|Q6P5Q4|LMOD2_HUMAN Leiomodin-2 OS=Homo sapiens OX=9606 GN=LMOD2 PE=1 SV=2	FUNCTION: Mediates nucleation of actin filaments and thereby promotes actin polymerization (PubMed:18403713, PubMed:26370058, PubMed:25250574, PubMed:26417072). Plays a role in the regulation of actin filament length (By similarity). Required for normal sarcomere organization in the heart, and for normal heart function (PubMed:18403713). {ECO:0000250|UniProtKB:Q3UHZ5, ECO:0000269|PubMed:18403713,…	SUBCELLULAR LOCATION: Cytoplasm, myofibril, sarcomere {ECO:0000269|PubMed:18403713, ECO:0000269|PubMed:20685966, ECO:0000269|PubMed:26370058}. Cytoplasm, myofibril {ECO:0000269|PubMed:20685966}. Cytoplasm, myofibril, sarcomere, M line {ECO:0000269|PubMed:18403713, ECO:0000269|PubMed:20685966}. Cytoplasm, cytoskeleton {ECO:0000269|PubMed:26370058}. Note=Colocalizes with actin filaments in sarcomer…		actin filament organization [GO:0007015]; actin filament polymerization [GO:0030041]; actin nucleation [GO:0045010]; muscle contraction [GO:0006936]; myofibril assembly [GO:0030239]; pointed-end actin filament capping [GO:0051694]; positive regulation of actin filament polymerization [GO:0030838]; sarcomere organization [GO:0045214]	actin binding [GO:0003779]; actin monomer binding [GO:0003785]; tropomyosin binding [GO:0005523]	actin filament [GO:0005884]; cytoskeleton [GO:0005856]; M band [GO:0031430]; myofibril [GO:0030016]; sarcomere [GO:0030017]; striated muscle thin filament [GO:0005865]	GO:0003779; GO:0003785; GO:0005523; GO:0005856; GO:0005865; GO:0005884; GO:0006936; GO:0007015; GO:0030016; GO:0030017; GO:0030041; GO:0030239; GO:0030838; GO:0031430; GO:0045010; GO:0045214; GO:0051694		hsa:442721;	Q6P5Q4	0.99861	S392	TKVWQRGTPSSSPYVSPRHSPWSSPKLPKKV	10.5243	10.686	10.7559	10.174	10.3704	10.2349	10.6139	11.4859	10.6438	11.9781	10.9432	11.7019	11.0441	11.471
ATP2A2_P16615_S663	-0.470643	-1.35597	-1.56666	0.147063	-0.385574	-0.848746	-1.07565	0.28703	0.331687	1.81385	0.83999	1.31645	0.327142	0.640025	ATP2A2	Sarcoplasmic/endoplasmic reticulum calcium ATPase 2	P16615	1.09631	0.000932552	0.039096	0.919174	sp|P16615|AT2A2_HUMAN Sarcoplasmic/endoplasmic reticulum calcium ATPase 2 OS=Homo sapiens OX=9606 GN=ATP2A2 PE=1 SV=1	FUNCTION: This magnesium-dependent enzyme catalyzes the hydrolysis of ATP coupled with the translocation of calcium from the cytosol to the sarcoplasmic reticulum lumen (PubMed:16402920). Involved in autophagy in response to starvation. Upon interaction with VMP1 and activation, controls ER-isolation membrane contacts for autophagosome formation (PubMed:28890335). Also modulates ER contacts with …	SUBCELLULAR LOCATION: Endoplasmic reticulum membrane {ECO:0000250|UniProtKB:O55143}; Multi-pass membrane protein {ECO:0000255}. Sarcoplasmic reticulum membrane {ECO:0000269|PubMed:12804600}; Multi-pass membrane protein {ECO:0000255}.	DISEASE: Acrokeratosis verruciformis (AKV) [MIM:101900]: A localized disorder of keratinization, which is inherited as an autosomal dominant trait. Its onset is early in life with multiple flat-topped, flesh-colored papules on the hands and feet, punctate keratoses on the palms and soles, with varying degrees of nail involvement. The histopathology shows a distinctive pattern of epidermal feature…	autophagosome assembly [GO:0000045]; autophagosome membrane docking [GO:0016240]; calcium ion import into sarcoplasmic reticulum [GO:1990036]; calcium ion transmembrane transport [GO:0070588]; calcium ion transport from cytosol to endoplasmic reticulum [GO:1903515]; cardiac muscle hypertrophy in response to stress [GO:0014898]; cell adhesion [GO:0007155]; cellular calcium ion homeostasis [GO:0006…	ATPase activity [GO:0016887]; ATP binding [GO:0005524]; calcium ion binding [GO:0005509]; enzyme binding [GO:0019899]; ion channel binding [GO:0044325]; lutropin-choriogonadotropic hormone receptor binding [GO:0031775]; protein C-terminus binding [GO:0008022]; P-type calcium transporter activity [GO:0005388]; P-type calcium transporter activity involved in regulation of cardiac muscle cell membra…	apical ectoplasmic specialization [GO:0061831]; calcium ion-transporting ATPase complex [GO:0090534]; endoplasmic reticulum [GO:0005783]; endoplasmic reticulum membrane [GO:0005789]; extrinsic component of cytoplasmic side of plasma membrane [GO:0031234]; integral component of plasma membrane [GO:0005887]; longitudinal sarcoplasmic reticulum [GO:0014801]; membrane [GO:0016020]; perinuclear region…	GO:0000045; GO:0002026; GO:0003009; GO:0005388; GO:0005509; GO:0005524; GO:0005783; GO:0005789; GO:0005887; GO:0006874; GO:0006984; GO:0007155; GO:0008022; GO:0008544; GO:0008553; GO:0010460; GO:0010882; GO:0012506; GO:0014801; GO:0014883; GO:0014898; GO:0016020; GO:0016240; GO:0016529; GO:0016887; GO:0019899; GO:0031095; GO:0031234; GO:0031775; GO:0032469; GO:0032470; GO:0032496; GO:0032991; GO:…	R-HSA-1912420;R-HSA-418359;R-HSA-5578775;R-HSA-936837;	hsa:488;	P16615	1	S663	TSKAFTGREFDELNPSAQRDACLNARCFARV	9.73148	9.21886	9.09687	10.0891	9.78073	9.51255	9.38117	10.1702	10.196	11.0542	10.4904	10.7662	10.1934	10.3746
TTN_Q8WZ42_S33245.1	0.29169	0.530243	1.18363	1.64632	1.00518	-0.579209	1.11139	-1.01504	-0.366466	-1.48828	-0.0979654	0.00543146	-1.30394	-0.922976	TTN	Titin	Q8WZ42	1.03854	0.0011354	0.0444831	-0.642594	sp|Q8WZ42|TITIN_HUMAN Titin OS=Homo sapiens OX=9606 GN=TTN PE=1 SV=4	FUNCTION: Key component in the assembly and functioning of vertebrate striated muscles. By providing connections at the level of individual microfilaments, it contributes to the fine balance of forces between the two halves of the sarcomere. The size and extensibility of the cross-links are the main determinants of sarcomere extensibility properties of muscle. In non-muscle cells, seems to play a…	SUBCELLULAR LOCATION: Cytoplasm {ECO:0000305|PubMed:16410549}. Nucleus {ECO:0000269|PubMed:16410549}.	DISEASE: Myopathy, myofibrillar, 9, with early respiratory failure (MFM9) [MIM:603689]: An autosomal dominant myopathy characterized by adulthood onset of weakness in proximal, distal, axial and respiratory muscles. Pelvic girdle weakness, foot drop and neck weakness are the main symptoms at onset, but ultimately the weakness usually involves the proximal compartment of both upper and lower limbs…	cardiac muscle contraction [GO:0060048]; cardiac muscle fiber development [GO:0048739]; cardiac muscle hypertrophy [GO:0003300]; cardiac muscle tissue morphogenesis [GO:0055008]; cardiac myofibril assembly [GO:0055003]; detection of muscle stretch [GO:0035995]; mitotic chromosome condensation [GO:0007076]; muscle contraction [GO:0006936]; muscle filament sliding [GO:0030049]; platelet degranulati…	actin filament binding [GO:0051015]; actinin binding [GO:0042805]; ATP binding [GO:0005524]; calcium ion binding [GO:0005509]; calmodulin binding [GO:0005516]; enzyme binding [GO:0019899]; identical protein binding [GO:0042802]; muscle alpha-actinin binding [GO:0051371]; protease binding [GO:0002020]; protein kinase binding [GO:0019901]; protein self-association [GO:0043621]; protein serine/threo…	condensed nuclear chromosome [GO:0000794]; cytosol [GO:0005829]; extracellular exosome [GO:0070062]; extracellular region [GO:0005576]; I band [GO:0031674]; M band [GO:0031430]; striated muscle thin filament [GO:0005865]; Z disc [GO:0030018]	GO:0000794; GO:0002020; GO:0002576; GO:0003300; GO:0004674; GO:0004713; GO:0005509; GO:0005516; GO:0005524; GO:0005576; GO:0005829; GO:0005865; GO:0006936; GO:0006941; GO:0007076; GO:0008307; GO:0010628; GO:0010737; GO:0019899; GO:0019901; GO:0030018; GO:0030049; GO:0030240; GO:0030241; GO:0031430; GO:0031433; GO:0031674; GO:0035995; GO:0042802; GO:0042805; GO:0043621; GO:0045214; GO:0045859; GO:…	R-HSA-114608;R-HSA-390522;	hsa:7273;	Q8WZ42	0.999635	S33245	DTERRSPTPERTRPRSPSPVSSERSLSRFER	17.1201	17.2235	17.5067	17.7072	17.4293	16.7426	17.4754	16.5537	16.8348	16.3486	16.9512	16.996	16.4285	16.5936
AKAP6_Q13023_S1614.1	-0.735756	-1.44626	-1.8268	-0.435716	-0.0104555	-0.444263	-0.269161	0.58551	0.0995711	0.954443	-0.0810644	1.37452	1.79295	0.442464	AKAP6	A-kinase anchor protein 6	Q13023	1.06896	0.0012605	0.0458191	0.775091	sp|Q13023|AKAP6_HUMAN A-kinase anchor protein 6 OS=Homo sapiens OX=9606 GN=AKAP6 PE=1 SV=3	FUNCTION: Binds to type II regulatory subunits of protein kinase A and anchors/targets them to the nuclear membrane or sarcoplasmic reticulum. May act as an adapter for assembling multiprotein complexes.	SUBCELLULAR LOCATION: Sarcoplasmic reticulum. Nucleus membrane. Note=In heart muscle. Participation of multiple targeting signals allow correct intracellular targeting. These may be repeated motifs rich in basic and hydrophobic amino acids, palmitoylated/myristoylated motifs or alternatively splice targeting sequences.		action potential [GO:0001508]; cAMP-mediated signaling [GO:0019933]; cellular response to cAMP [GO:0071320]; cellular response to cytokine stimulus [GO:0071345]; positive regulation of calcineurin-NFAT signaling cascade [GO:0070886]; positive regulation of cell growth [GO:0030307]; positive regulation of cell growth involved in cardiac muscle cell development [GO:0061051]; positive regulation of …	adenylate cyclase binding [GO:0008179]; ion channel binding [GO:0044325]; molecular adaptor activity [GO:0060090]; protein kinase A binding [GO:0051018]; protein kinase A regulatory subunit binding [GO:0034237]; protein-membrane adaptor activity [GO:0043495]	calcium channel complex [GO:0034704]; caveola [GO:0005901]; cytoplasm [GO:0005737]; intercalated disc [GO:0014704]; junctional sarcoplasmic reticulum membrane [GO:0014701]; nuclear envelope [GO:0005635]; nuclear membrane [GO:0031965]; perinuclear region of cytoplasm [GO:0048471]; sarcoplasmic reticulum [GO:0016529]; T-tubule [GO:0030315]	GO:0001508; GO:0005635; GO:0005737; GO:0005901; GO:0006605; GO:0008179; GO:0010738; GO:0010880; GO:0014701; GO:0014704; GO:0016529; GO:0019933; GO:0030307; GO:0030315; GO:0031965; GO:0034237; GO:0034704; GO:0043495; GO:0044325; GO:0048471; GO:0051018; GO:0051281; GO:0060090; GO:0060306; GO:0060316; GO:0061051; GO:0070886; GO:0071320; GO:0071345; GO:1901381; GO:1902261		hsa:9472;	Q13023	0.78036	S1614	WLTSYKSNEDLFSCHSSGDISVSSGSVGELS	11.2412	10.8683	10.6686	11.3987	11.6219	11.3942	11.4862	11.9348	11.6797	12.1284	11.5849	12.3489	12.5685	11.8597
TTN_Q8WZ42_S1423.1	0.382065	1.46188	1.16777	1.15215	1.13892	-0.441593	0.619202	-0.978434	-0.670842	-1.46957	0.28129	-0.992892	-0.544689	-1.10526	TTN	Titin	Q8WZ42	1.04725	0.00146248	0.0494524	-0.70364	sp|Q8WZ42|TITIN_HUMAN Titin OS=Homo sapiens OX=9606 GN=TTN PE=1 SV=4	FUNCTION: Key component in the assembly and functioning of vertebrate striated muscles. By providing connections at the level of individual microfilaments, it contributes to the fine balance of forces between the two halves of the sarcomere. The size and extensibility of the cross-links are the main determinants of sarcomere extensibility properties of muscle. In non-muscle cells, seems to play a…	SUBCELLULAR LOCATION: Cytoplasm {ECO:0000305|PubMed:16410549}. Nucleus {ECO:0000269|PubMed:16410549}.	DISEASE: Myopathy, myofibrillar, 9, with early respiratory failure (MFM9) [MIM:603689]: An autosomal dominant myopathy characterized by adulthood onset of weakness in proximal, distal, axial and respiratory muscles. Pelvic girdle weakness, foot drop and neck weakness are the main symptoms at onset, but ultimately the weakness usually involves the proximal compartment of both upper and lower limbs…	cardiac muscle contraction [GO:0060048]; cardiac muscle fiber development [GO:0048739]; cardiac muscle hypertrophy [GO:0003300]; cardiac muscle tissue morphogenesis [GO:0055008]; cardiac myofibril assembly [GO:0055003]; detection of muscle stretch [GO:0035995]; mitotic chromosome condensation [GO:0007076]; muscle contraction [GO:0006936]; muscle filament sliding [GO:0030049]; platelet degranulati…	actin filament binding [GO:0051015]; actinin binding [GO:0042805]; ATP binding [GO:0005524]; calcium ion binding [GO:0005509]; calmodulin binding [GO:0005516]; enzyme binding [GO:0019899]; identical protein binding [GO:0042802]; muscle alpha-actinin binding [GO:0051371]; protease binding [GO:0002020]; protein kinase binding [GO:0019901]; protein self-association [GO:0043621]; protein serine/threo…	condensed nuclear chromosome [GO:0000794]; cytosol [GO:0005829]; extracellular exosome [GO:0070062]; extracellular region [GO:0005576]; I band [GO:0031674]; M band [GO:0031430]; striated muscle thin filament [GO:0005865]; Z disc [GO:0030018]	GO:0000794; GO:0002020; GO:0002576; GO:0003300; GO:0004674; GO:0004713; GO:0005509; GO:0005516; GO:0005524; GO:0005576; GO:0005829; GO:0005865; GO:0006936; GO:0006941; GO:0007076; GO:0008307; GO:0010628; GO:0010737; GO:0019899; GO:0019901; GO:0030018; GO:0030049; GO:0030240; GO:0030241; GO:0031430; GO:0031433; GO:0031674; GO:0035995; GO:0042802; GO:0042805; GO:0043621; GO:0045214; GO:0045859; GO:…	R-HSA-114608;R-HSA-390522;	hsa:7273;	Q8WZ42	1	S1423	RSVSRSPIRMSPARMSPARMSPARMSPARMS	15.416	15.9012	15.769	15.762	15.7561	15.0458	15.5225	14.8046	14.9428	14.5839	15.3707	14.7981	14.9995	14.7476
SYNPO2_Q9UMS6_S906.1	-0.102622	0.00720938	0.258757	0.577814	0.292539	1.17234	2	-0.720802	-0.997677	-1.29178	-1.09258	-1.06316	0.299112	0.332558	SYNPO2	Synaptopodin-2	Q9UMS6	1.03463	0.00157758	0.0519541	-0.517697	sp|Q9UMS6|SYNP2_HUMAN Synaptopodin-2 OS=Homo sapiens OX=9606 GN=SYNPO2 PE=1 SV=2	FUNCTION: Has an actin-binding and actin-bundling activity. Can induce the formation of F-actin networks in an isoform-specific manner (PubMed:24005909, PubMed:23225103). At the sarcomeric Z lines is proposed to act as adapter protein that links nascent myofibers to the sarcolemma via ZYX and may play a role in early assembly and stabilization of the Z lines. Involved in autophagosome formation. …	SUBCELLULAR LOCATION: Nucleus {ECO:0000250|UniProtKB:Q91YE8}. Cytoplasm {ECO:0000250|UniProtKB:Q91YE8}. Cytoplasm, cytoskeleton {ECO:0000269|PubMed:24005909}. Cytoplasm, myofibril, sarcomere, Z line {ECO:0000269|PubMed:20554076}. Cell junction, focal adhesion {ECO:0000269|PubMed:20554076}. Note=Shuttles between the nucleus and the cytoplasm in a differentiation-dependent and stress-induced fashio…		autophagosome assembly [GO:0000045]; chaperone-mediated autophagy [GO:0061684]; positive regulation of actin filament bundle assembly [GO:0032233]; positive regulation of cell migration [GO:0030335]; regulation of Rho-dependent protein serine/threonine kinase activity [GO:2000298]	14-3-3 protein binding [GO:0071889]; actin binding [GO:0003779]; alpha-actinin binding [GO:0051393]; filamin binding [GO:0031005]; muscle alpha-actinin binding [GO:0051371]; protein-macromolecule adaptor activity [GO:0030674]	actin cytoskeleton [GO:0015629]; cytosol [GO:0005829]; focal adhesion [GO:0005925]; intracellular membrane-bounded organelle [GO:0043231]; nucleoplasm [GO:0005654]; nucleus [GO:0005634]; stress fiber [GO:0001725]; vesicle tethering complex [GO:0099023]; Z disc [GO:0030018]	GO:0000045; GO:0001725; GO:0003779; GO:0005634; GO:0005654; GO:0005829; GO:0005925; GO:0015629; GO:0030018; GO:0030335; GO:0030674; GO:0031005; GO:0032233; GO:0043231; GO:0051371; GO:0051393; GO:0061684; GO:0071889; GO:0099023; GO:2000298		hsa:171024;	Q9UMS6	0.99384	S906	DTVQAHAARAQSPTPSLPASWKYSSNVRAPP	15.1692	15.2131	15.3136	15.4411	15.3271	15.6787	16.1406	14.9221	14.8115	14.694	14.7736	14.7853	15.3297	15.3431
SYNPO2_Q9UMS6_T904.1	-0.102622	0.00720938	0.258757	0.577814	0.292539	1.17234	2	-0.720802	-0.997677	-1.29178	-1.09258	-1.06316	0.299112	0.332558	SYNPO2	Synaptopodin-2	Q9UMS6	1.03463	0.00157758	0.0519541	-0.517697	sp|Q9UMS6|SYNP2_HUMAN Synaptopodin-2 OS=Homo sapiens OX=9606 GN=SYNPO2 PE=1 SV=2	FUNCTION: Has an actin-binding and actin-bundling activity. Can induce the formation of F-actin networks in an isoform-specific manner (PubMed:24005909, PubMed:23225103). At the sarcomeric Z lines is proposed to act as adapter protein that links nascent myofibers to the sarcolemma via ZYX and may play a role in early assembly and stabilization of the Z lines. Involved in autophagosome formation. …	SUBCELLULAR LOCATION: Nucleus {ECO:0000250|UniProtKB:Q91YE8}. Cytoplasm {ECO:0000250|UniProtKB:Q91YE8}. Cytoplasm, cytoskeleton {ECO:0000269|PubMed:24005909}. Cytoplasm, myofibril, sarcomere, Z line {ECO:0000269|PubMed:20554076}. Cell junction, focal adhesion {ECO:0000269|PubMed:20554076}. Note=Shuttles between the nucleus and the cytoplasm in a differentiation-dependent and stress-induced fashio…		autophagosome assembly [GO:0000045]; chaperone-mediated autophagy [GO:0061684]; positive regulation of actin filament bundle assembly [GO:0032233]; positive regulation of cell migration [GO:0030335]; regulation of Rho-dependent protein serine/threonine kinase activity [GO:2000298]	14-3-3 protein binding [GO:0071889]; actin binding [GO:0003779]; alpha-actinin binding [GO:0051393]; filamin binding [GO:0031005]; muscle alpha-actinin binding [GO:0051371]; protein-macromolecule adaptor activity [GO:0030674]	actin cytoskeleton [GO:0015629]; cytosol [GO:0005829]; focal adhesion [GO:0005925]; intracellular membrane-bounded organelle [GO:0043231]; nucleoplasm [GO:0005654]; nucleus [GO:0005634]; stress fiber [GO:0001725]; vesicle tethering complex [GO:0099023]; Z disc [GO:0030018]	GO:0000045; GO:0001725; GO:0003779; GO:0005634; GO:0005654; GO:0005829; GO:0005925; GO:0015629; GO:0030018; GO:0030335; GO:0030674; GO:0031005; GO:0032233; GO:0043231; GO:0051371; GO:0051393; GO:0061684; GO:0071889; GO:0099023; GO:2000298		hsa:171024;	Q9UMS6	0.936705	T904	DSDTVQAHAARAQSPTPSLPASWKYSSNVRA	15.1692	15.2131	15.3136	15.4411	15.3271	15.6787	16.1406	14.9221	14.8115	14.694	14.7736	14.7853	15.3297	15.3431
MYBPC3_Q14896_S275	0.474602	-0.248002	0.3585	1.37373	0.858681	1.01067	1.48034	-1.63444	-0.626931	0.540875	-1.09021	-1.07039	-0.850373	-0.577047	MYBPC3	Myosin-binding protein C, cardiac-type	Q14896	1.07683	0.00173954	0.0536583	-0.989897	sp|Q14896|MYPC3_HUMAN Myosin-binding protein C, cardiac-type OS=Homo sapiens OX=9606 GN=MYBPC3 PE=1 SV=4	FUNCTION: Thick filament-associated protein located in the crossbridge region of vertebrate striated muscle a bands. In vitro it binds MHC, F-actin and native thin filaments, and modifies the activity of actin-activated myosin ATPase. It may modulate muscle contraction or may play a more structural role.		DISEASE: Cardiomyopathy, familial hypertrophic 4 (CMH4) [MIM:115197]: A hereditary heart disorder characterized by ventricular hypertrophy, which is usually asymmetric and often involves the interventricular septum. The symptoms include dyspnea, syncope, collapse, palpitations, and chest pain. They can be readily provoked by exercise. The disorder has inter- and intrafamilial variability ranging …	cardiac muscle contraction [GO:0060048]; cell adhesion [GO:0007155]; heart morphogenesis [GO:0003007]; muscle filament sliding [GO:0030049]; positive regulation of ATPase activity [GO:0032781]; regulation of muscle filament sliding [GO:0032971]; regulation of striated muscle contraction [GO:0006942]; ventricular cardiac muscle tissue morphogenesis [GO:0055010]	actin binding [GO:0003779]; ATPase activator activity [GO:0001671]; identical protein binding [GO:0042802]; metal ion binding [GO:0046872]; myosin binding [GO:0017022]; myosin heavy chain binding [GO:0032036]; structural constituent of muscle [GO:0008307]; titin binding [GO:0031432]	A band [GO:0031672]; cardiac myofibril [GO:0097512]; cytosol [GO:0005829]; C zone [GO:0014705]; sarcomere [GO:0030017]; striated muscle myosin thick filament [GO:0005863]	GO:0001671; GO:0003007; GO:0003779; GO:0005829; GO:0005863; GO:0006942; GO:0007155; GO:0008307; GO:0014705; GO:0017022; GO:0030017; GO:0030049; GO:0031432; GO:0031672; GO:0032036; GO:0032781; GO:0032971; GO:0042802; GO:0046872; GO:0055010; GO:0060048; GO:0097512	R-HSA-390522;	hsa:4607;	Q14896	0.976527	S275	MGTGDLDLLSAFRRTSLAGGGRRISDSHEDT	13.6893	13.2177	13.6135	14.2761	13.94	14.0392	14.3457	12.3128	12.9704	13.7326	12.668	12.681	12.8246	13.0029
FLNC_Q14315_S1527	-0.58393	-2	-0.251286	-0.636341	-0.269257	-0.177643	-0.947138	1.0502	0.378429	-0.458513	1.9719	0.627019	1.19177	0.10969	FLNC	Filamin-C	Q14315	1.0867	0.00208836	0.0576546	0.991276	sp|Q14315|FLNC_HUMAN Filamin-C OS=Homo sapiens OX=9606 GN=FLNC PE=1 SV=3	FUNCTION: Muscle-specific filamin, which plays a central role in muscle cells, probably by functioning as a large actin-cross-linking protein. May be involved in reorganizing the actin cytoskeleton in response to signaling events, and may also display structural functions at the Z lines in muscle cells. Critical for normal myogenesis and for maintaining the structural integrity of the muscle fibe…	SUBCELLULAR LOCATION: Cytoplasm {ECO:0000269|PubMed:11038172, ECO:0000269|PubMed:25351925}. Membrane {ECO:0000269|PubMed:11038172}; Peripheral membrane protein {ECO:0000269|PubMed:11038172}. Cytoplasm, cytoskeleton {ECO:0000269|PubMed:11038172}. Cytoplasm, myofibril, sarcomere, Z line {ECO:0000269|PubMed:11038172}. Note=A small amount localizes at membranes. In striated muscle cells, it predomina…	DISEASE: Myopathy, myofibrillar, 5 (MFM5) [MIM:609524]: A form of myofibrillar myopathy, a group of chronic neuromuscular disorders characterized at ultrastructural level by disintegration of the sarcomeric Z disk and myofibrils, and replacement of the normal myofibrillar markings by small dense granules, or larger hyaline masses, or amorphous material. MFM5 is characterized by onset in adulthood…	cell junction assembly [GO:0034329]; muscle fiber development [GO:0048747]	actin binding [GO:0003779]; ankyrin binding [GO:0030506]; cytoskeletal protein binding [GO:0008092]; identical protein binding [GO:0042802]	costamere [GO:0043034]; cytoplasm [GO:0005737]; cytoskeleton [GO:0005856]; cytosol [GO:0005829]; focal adhesion [GO:0005925]; plasma membrane [GO:0005886]; sarcolemma [GO:0042383]; sarcoplasm [GO:0016528]; Z disc [GO:0030018]	GO:0003779; GO:0005737; GO:0005829; GO:0005856; GO:0005886; GO:0005925; GO:0008092; GO:0016528; GO:0030018; GO:0030506; GO:0034329; GO:0042383; GO:0042802; GO:0043034; GO:0048747	R-HSA-446353;	hsa:2318;	Q14315	0.999949	S1527	PYTVAVKYADQEVPRSPFKIKVLPAHDASKV	11.5134	10.5012	11.7503	11.4761	11.7375	11.8028	11.2547	12.6774	12.1989	11.6027	13.334	12.376	12.7783	12.0075
TTN_Q8WZ42_S33250.1	0.283543	0.673271	1.05022	1.39484	0.816811	-0.633196	0.970702	-0.575828	-0.018844	-2	0.0200572	0.127526	-1.18369	-0.632453	TTN	Titin	Q8WZ42	1.05854	0.00362884	0.0787511	-0.930305	sp|Q8WZ42|TITIN_HUMAN Titin OS=Homo sapiens OX=9606 GN=TTN PE=1 SV=4	FUNCTION: Key component in the assembly and functioning of vertebrate striated muscles. By providing connections at the level of individual microfilaments, it contributes to the fine balance of forces between the two halves of the sarcomere. The size and extensibility of the cross-links are the main determinants of sarcomere extensibility properties of muscle. In non-muscle cells, seems to play a…	SUBCELLULAR LOCATION: Cytoplasm {ECO:0000305|PubMed:16410549}. Nucleus {ECO:0000269|PubMed:16410549}.	DISEASE: Myopathy, myofibrillar, 9, with early respiratory failure (MFM9) [MIM:603689]: An autosomal dominant myopathy characterized by adulthood onset of weakness in proximal, distal, axial and respiratory muscles. Pelvic girdle weakness, foot drop and neck weakness are the main symptoms at onset, but ultimately the weakness usually involves the proximal compartment of both upper and lower limbs…	cardiac muscle contraction [GO:0060048]; cardiac muscle fiber development [GO:0048739]; cardiac muscle hypertrophy [GO:0003300]; cardiac muscle tissue morphogenesis [GO:0055008]; cardiac myofibril assembly [GO:0055003]; detection of muscle stretch [GO:0035995]; mitotic chromosome condensation [GO:0007076]; muscle contraction [GO:0006936]; muscle filament sliding [GO:0030049]; platelet degranulati…	actin filament binding [GO:0051015]; actinin binding [GO:0042805]; ATP binding [GO:0005524]; calcium ion binding [GO:0005509]; calmodulin binding [GO:0005516]; enzyme binding [GO:0019899]; identical protein binding [GO:0042802]; muscle alpha-actinin binding [GO:0051371]; protease binding [GO:0002020]; protein kinase binding [GO:0019901]; protein self-association [GO:0043621]; protein serine/threo…	condensed nuclear chromosome [GO:0000794]; cytosol [GO:0005829]; extracellular exosome [GO:0070062]; extracellular region [GO:0005576]; I band [GO:0031674]; M band [GO:0031430]; striated muscle thin filament [GO:0005865]; Z disc [GO:0030018]	GO:0000794; GO:0002020; GO:0002576; GO:0003300; GO:0004674; GO:0004713; GO:0005509; GO:0005516; GO:0005524; GO:0005576; GO:0005829; GO:0005865; GO:0006936; GO:0006941; GO:0007076; GO:0008307; GO:0010628; GO:0010737; GO:0019899; GO:0019901; GO:0030018; GO:0030049; GO:0030240; GO:0030241; GO:0031430; GO:0031433; GO:0031674; GO:0035995; GO:0042802; GO:0042805; GO:0043621; GO:0045214; GO:0045859; GO:…	R-HSA-114608;R-HSA-390522;	hsa:7273;	Q8WZ42	0.934696	S33250	SPTPERTRPRSPSPVSSERSLSRFERSARFD	16.5608	16.8393	17.1087	17.355	16.9419	15.9057	17.0519	15.9467	16.3447	14.7195	16.3725	16.4493	15.5123	15.9062
JPH1_Q9HDC5_S157.1	0.137991	2	0.0218626	0.551867	1.16237	-0.0609199	0.816223	-1.20829	-0.408464	0.290693	-0.631617	-1.0245	-1.66016	-0.158186	JPH1	Junctophilin-1	Q9HDC5	1.04596	0.00433312	0.0863572	-0.604759	sp|Q9HDC5|JPH1_HUMAN Junctophilin-1 OS=Homo sapiens OX=9606 GN=JPH1 PE=1 SV=2	FUNCTION: Junctophilins contribute to the formation of junctional membrane complexes (JMCs) which link the plasma membrane with the endoplasmic or sarcoplasmic reticulum in excitable cells. Provides a structural foundation for functional cross-talk between the cell surface and intracellular calcium release channels. JPH1 contributes to the construction of the skeletal muscle triad by linking the …	SUBCELLULAR LOCATION: Cell membrane {ECO:0000250}; Peripheral membrane protein {ECO:0000250}. Endoplasmic reticulum membrane {ECO:0000250}; Single-pass type IV membrane protein {ECO:0000250}. Sarcoplasmic reticulum membrane {ECO:0000250}; Single-pass type IV membrane protein {ECO:0000250}. Note=Localized predominantly on the plasma membrane. The transmembrane domain is anchored in endoplasmic/sar…		calcium ion transport into cytosol [GO:0060402]; muscle organ development [GO:0007517]; regulation of ryanodine-sensitive calcium-release channel activity [GO:0060314]	structural constituent of muscle [GO:0008307]	endoplasmic reticulum membrane [GO:0005789]; integral component of membrane [GO:0016021]; junctional membrane complex [GO:0030314]; junctional sarcoplasmic reticulum membrane [GO:0014701]; nucleoplasm [GO:0005654]; plasma membrane [GO:0005886]; sarcoplasmic reticulum [GO:0016529]; Z disc [GO:0030018]	GO:0005654; GO:0005789; GO:0005886; GO:0007517; GO:0008307; GO:0014701; GO:0016021; GO:0016529; GO:0030018; GO:0030314; GO:0060314; GO:0060402		hsa:56704;	Q9HDC5	0.948591	S157	GVRQSVPYGMATVIRSPLRTSLASLRSEQSN	13.5217	14.4182	13.4705	13.7042	13.9734	13.434	13.8208	12.9281	13.2808	13.5891	13.1824	13.0092	12.7289	13.3912
TTN_Q8WZ42_T267.1	0.236463	1.71425	-0.452499	0.826008	1.22201	-0.201905	1.11892	0.374486	-0.650116	-2	-0.445451	-0.312648	-0.448084	-0.847289	TTN	Titin	Q8WZ42	1.053	0.00455005	0.088604	-0.662596	sp|Q8WZ42|TITIN_HUMAN Titin OS=Homo sapiens OX=9606 GN=TTN PE=1 SV=4	FUNCTION: Key component in the assembly and functioning of vertebrate striated muscles. By providing connections at the level of individual microfilaments, it contributes to the fine balance of forces between the two halves of the sarcomere. The size and extensibility of the cross-links are the main determinants of sarcomere extensibility properties of muscle. In non-muscle cells, seems to play a…	SUBCELLULAR LOCATION: Cytoplasm {ECO:0000305|PubMed:16410549}. Nucleus {ECO:0000269|PubMed:16410549}.	DISEASE: Myopathy, myofibrillar, 9, with early respiratory failure (MFM9) [MIM:603689]: An autosomal dominant myopathy characterized by adulthood onset of weakness in proximal, distal, axial and respiratory muscles. Pelvic girdle weakness, foot drop and neck weakness are the main symptoms at onset, but ultimately the weakness usually involves the proximal compartment of both upper and lower limbs…	cardiac muscle contraction [GO:0060048]; cardiac muscle fiber development [GO:0048739]; cardiac muscle hypertrophy [GO:0003300]; cardiac muscle tissue morphogenesis [GO:0055008]; cardiac myofibril assembly [GO:0055003]; detection of muscle stretch [GO:0035995]; mitotic chromosome condensation [GO:0007076]; muscle contraction [GO:0006936]; muscle filament sliding [GO:0030049]; platelet degranulati…	actin filament binding [GO:0051015]; actinin binding [GO:0042805]; ATP binding [GO:0005524]; calcium ion binding [GO:0005509]; calmodulin binding [GO:0005516]; enzyme binding [GO:0019899]; identical protein binding [GO:0042802]; muscle alpha-actinin binding [GO:0051371]; protease binding [GO:0002020]; protein kinase binding [GO:0019901]; protein self-association [GO:0043621]; protein serine/threo…	condensed nuclear chromosome [GO:0000794]; cytosol [GO:0005829]; extracellular exosome [GO:0070062]; extracellular region [GO:0005576]; I band [GO:0031674]; M band [GO:0031430]; striated muscle thin filament [GO:0005865]; Z disc [GO:0030018]	GO:0000794; GO:0002020; GO:0002576; GO:0003300; GO:0004674; GO:0004713; GO:0005509; GO:0005516; GO:0005524; GO:0005576; GO:0005829; GO:0005865; GO:0006936; GO:0006941; GO:0007076; GO:0008307; GO:0010628; GO:0010737; GO:0019899; GO:0019901; GO:0030018; GO:0030049; GO:0030240; GO:0030241; GO:0031430; GO:0031433; GO:0031674; GO:0035995; GO:0042802; GO:0042805; GO:0043621; GO:0045214; GO:0045859; GO:…	R-HSA-114608;R-HSA-390522;	hsa:7273;	Q8WZ42	0.985629	T267	KTPPRIPPKPKSRSPTPPSIAAKAQLARQQS	12.9568	13.7246	12.5988	13.2631	13.4689	12.729	13.4153	13.0285	12.4961	11.725	12.6025	12.6715	12.6011	12.3937
TNS1_Q9HBL0_S907.1	-0.170951	-0.790218	-0.860096	-0.849274	-1.41962	-0.418817	-0.401865	0.216411	1.37338	2	-0.437924	0.202236	0.122815	1.23927	TNS1	Tensin-1	Q9HBL0	1.05026	0.00482867	0.0912477	0.661394	sp|Q9HBL0|TENS1_HUMAN Tensin-1 OS=Homo sapiens OX=9606 GN=TNS1 PE=1 SV=2	FUNCTION: Involved in fibrillar adhesion formation. May be involved in cell migration, cartilage development and in linking signal transduction pathways to the cytoskeleton. {ECO:0000269|PubMed:21768292}.	SUBCELLULAR LOCATION: Cell surface {ECO:0000269|PubMed:21768292}. Cell junction, focal adhesion {ECO:0000269|PubMed:21768292}. Cytoplasm, cytoskeleton {ECO:0000269|PubMed:21768292}. Note=Localized at cell periphery preferentially to fibrillar adhesions than focal adhesions. Translocates from the cell edge to cell center in an ITGB1BP1-dependent manner.			actin binding [GO:0003779]; RNA binding [GO:0003723]	cell surface [GO:0009986]; cytoplasm [GO:0005737]; cytoskeleton [GO:0005856]; focal adhesion [GO:0005925]	GO:0003723; GO:0003779; GO:0005737; GO:0005856; GO:0005925; GO:0009986		hsa:7145;	Q9HBL0	0.999227	S907	PLRRRAASDGQYENQSPEATSPRSPGVRSPV	13.4094	13.1175	13.0846	13.0897	12.8208	13.2926	13.3006	13.592	14.1374	14.5245	13.2836	13.5853	13.5479	14.0742
HCN4_Q9Y3Q4_S1108.1	0.550687	0.740844	0.33391	0.152432	0.161833	0.698178	2	-0.474712	-0.616818	-0.439976	-0.047849	-1.63525	-1.4246	-0.412091	HCN4	Potassium/sodium hyperpolarization-activated cyclic nucleotide-gated channel 4	Q9Y3Q4	1.05088	0.004895	0.0912477	-0.515232	sp|Q9Y3Q4|HCN4_HUMAN Potassium/sodium hyperpolarization-activated cyclic nucleotide-gated channel 4 OS=Homo sapiens OX=9606 GN=HCN4 PE=1 SV=1	FUNCTION: Hyperpolarization-activated ion channel with very slow activation and inactivation exhibiting weak selectivity for potassium over sodium ions. Contributes to the native pacemaker currents in heart (If) that regulate the rhythm of heart beat. May contribute to the native pacemaker currents in neurons (Ih). May mediate responses to sour stimuli. {ECO:0000269|PubMed:10228147, ECO:0000269|P…	SUBCELLULAR LOCATION: Cell membrane {ECO:0000269|PubMed:10228147, ECO:0000269|PubMed:10430953, ECO:0000269|PubMed:16407510}; Multi-pass membrane protein {ECO:0000269|PubMed:10228147, ECO:0000269|PubMed:10430953, ECO:0000269|PubMed:16407510}.	DISEASE: Sick sinus syndrome 2 (SSS2) [MIM:163800]: The term 'sick sinus syndrome' encompasses a variety of conditions caused by sinus node dysfunction. The most common clinical manifestations are syncope, presyncope, dizziness, and fatigue. Electrocardiogram typically shows sinus bradycardia, sinus arrest, and/or sinoatrial block. Episodes of atrial tachycardias coexisting with sinus bradycardia…	blood circulation [GO:0008015]; cardiac conduction system development [GO:0003161]; cation transport [GO:0006812]; cellular response to cAMP [GO:0071320]; cellular response to cGMP [GO:0071321]; membrane depolarization during cardiac muscle cell action potential [GO:0086012]; membrane depolarization during SA node cell action potential [GO:0086046]; muscle contraction [GO:0006936]; potassium ion …	cAMP binding [GO:0030552]; identical protein binding [GO:0042802]; intracellular cAMP-activated cation channel activity [GO:0005222]; voltage-gated potassium channel activity [GO:0005249]; voltage-gated potassium channel activity involved in SA node cell action potential depolarization [GO:0086041]; voltage-gated sodium channel activity [GO:0005248]	HCN channel complex [GO:0098855]; intrinsic component of plasma membrane [GO:0031226]; perinuclear region of cytoplasm [GO:0048471]; plasma membrane [GO:0005886]	GO:0002027; GO:0003161; GO:0003163; GO:0003254; GO:0005222; GO:0005248; GO:0005249; GO:0005886; GO:0006812; GO:0006936; GO:0008015; GO:0030552; GO:0031226; GO:0034765; GO:0035725; GO:0042391; GO:0042802; GO:0048471; GO:0055117; GO:0071320; GO:0071321; GO:0071805; GO:0086012; GO:0086015; GO:0086041; GO:0086046; GO:0086091; GO:0098719; GO:0098855; GO:0098909; GO:1990573	R-HSA-1296061;	hsa:10021;	Q9Y3Q4	0.979533	S1108	LPQDGAQTLRRASPHSSGESMAAFPLFPRAG	10.5808	10.6487	10.5034	10.4386	10.442	10.6334	11.2458	10.2147	10.164	10.2271	10.3671	9.80041	9.87562	10.2371
HCN4_Q9Y3Q4_S1109.1	0.550687	0.740844	0.33391	0.152432	0.161833	0.698178	2	-0.474712	-0.616818	-0.439976	-0.047849	-1.63525	-1.4246	-0.412091	HCN4	Potassium/sodium hyperpolarization-activated cyclic nucleotide-gated channel 4	Q9Y3Q4	1.05088	0.004895	0.0912477	-0.515232	sp|Q9Y3Q4|HCN4_HUMAN Potassium/sodium hyperpolarization-activated cyclic nucleotide-gated channel 4 OS=Homo sapiens OX=9606 GN=HCN4 PE=1 SV=1	FUNCTION: Hyperpolarization-activated ion channel with very slow activation and inactivation exhibiting weak selectivity for potassium over sodium ions. Contributes to the native pacemaker currents in heart (If) that regulate the rhythm of heart beat. May contribute to the native pacemaker currents in neurons (Ih). May mediate responses to sour stimuli. {ECO:0000269|PubMed:10228147, ECO:0000269|P…	SUBCELLULAR LOCATION: Cell membrane {ECO:0000269|PubMed:10228147, ECO:0000269|PubMed:10430953, ECO:0000269|PubMed:16407510}; Multi-pass membrane protein {ECO:0000269|PubMed:10228147, ECO:0000269|PubMed:10430953, ECO:0000269|PubMed:16407510}.	DISEASE: Sick sinus syndrome 2 (SSS2) [MIM:163800]: The term 'sick sinus syndrome' encompasses a variety of conditions caused by sinus node dysfunction. The most common clinical manifestations are syncope, presyncope, dizziness, and fatigue. Electrocardiogram typically shows sinus bradycardia, sinus arrest, and/or sinoatrial block. Episodes of atrial tachycardias coexisting with sinus bradycardia…	blood circulation [GO:0008015]; cardiac conduction system development [GO:0003161]; cation transport [GO:0006812]; cellular response to cAMP [GO:0071320]; cellular response to cGMP [GO:0071321]; membrane depolarization during cardiac muscle cell action potential [GO:0086012]; membrane depolarization during SA node cell action potential [GO:0086046]; muscle contraction [GO:0006936]; potassium ion …	cAMP binding [GO:0030552]; identical protein binding [GO:0042802]; intracellular cAMP-activated cation channel activity [GO:0005222]; voltage-gated potassium channel activity [GO:0005249]; voltage-gated potassium channel activity involved in SA node cell action potential depolarization [GO:0086041]; voltage-gated sodium channel activity [GO:0005248]	HCN channel complex [GO:0098855]; intrinsic component of plasma membrane [GO:0031226]; perinuclear region of cytoplasm [GO:0048471]; plasma membrane [GO:0005886]	GO:0002027; GO:0003161; GO:0003163; GO:0003254; GO:0005222; GO:0005248; GO:0005249; GO:0005886; GO:0006812; GO:0006936; GO:0008015; GO:0030552; GO:0031226; GO:0034765; GO:0035725; GO:0042391; GO:0042802; GO:0048471; GO:0055117; GO:0071320; GO:0071321; GO:0071805; GO:0086012; GO:0086015; GO:0086041; GO:0086046; GO:0086091; GO:0098719; GO:0098855; GO:0098909; GO:1990573	R-HSA-1296061;	hsa:10021;	Q9Y3Q4	0.975093	S1109	PQDGAQTLRRASPHSSGESMAAFPLFPRAGG	10.5808	10.6487	10.5034	10.4386	10.442	10.6334	11.2458	10.2147	10.164	10.2271	10.3671	9.80041	9.87562	10.2371
AKAP2_Q9Y2D5_S748	-0.117607	-0.717096	-0.821713	-0.850172	-0.727596	-0.574182	-0.890247	0.54807	0.945122	2	-0.57969	-0.00275109	0.128241	1.06177	AKAP2	A-kinase anchor protein 2	Q9Y2D5	1.07867	0.00506506	0.0920272	0.98902	sp|Q9Y2D5|AKAP2_HUMAN A-kinase anchor protein 2 OS=Homo sapiens OX=9606 GN=AKAP2 PE=1 SV=3	FUNCTION: Binds to regulatory subunit (RII) of protein kinase A. May be involved in establishing polarity in signaling systems or in integrating PKA-RII isoforms with downstream effectors to capture, amplify and focus diffuse, trans-cellular signals carried by cAMP (By similarity). {ECO:0000250}.									Q9Y2D5	0.999995	S748	EEELKRQRQVLQSTQSPRTKNAPSLPSRTCY	12.9792	12.5376	12.4605	12.4395	12.5298	12.6428	12.41	13.4696	13.7621	14.9797	12.6388	13.0638	13.1603	13.8481
TTN_Q8WZ42_S265	0.681157	1.68408	0.547169	1.50108	0.922332	-0.430579	0.0228795	-0.51455	-0.448083	-1.87254	-0.227342	-0.918739	0.156917	-1.10378	TTN	Titin	Q8WZ42	1.05441	0.00523454	0.0928173	-0.606702	sp|Q8WZ42|TITIN_HUMAN Titin OS=Homo sapiens OX=9606 GN=TTN PE=1 SV=4	FUNCTION: Key component in the assembly and functioning of vertebrate striated muscles. By providing connections at the level of individual microfilaments, it contributes to the fine balance of forces between the two halves of the sarcomere. The size and extensibility of the cross-links are the main determinants of sarcomere extensibility properties of muscle. In non-muscle cells, seems to play a…	SUBCELLULAR LOCATION: Cytoplasm {ECO:0000305|PubMed:16410549}. Nucleus {ECO:0000269|PubMed:16410549}.	DISEASE: Myopathy, myofibrillar, 9, with early respiratory failure (MFM9) [MIM:603689]: An autosomal dominant myopathy characterized by adulthood onset of weakness in proximal, distal, axial and respiratory muscles. Pelvic girdle weakness, foot drop and neck weakness are the main symptoms at onset, but ultimately the weakness usually involves the proximal compartment of both upper and lower limbs…	cardiac muscle contraction [GO:0060048]; cardiac muscle fiber development [GO:0048739]; cardiac muscle hypertrophy [GO:0003300]; cardiac muscle tissue morphogenesis [GO:0055008]; cardiac myofibril assembly [GO:0055003]; detection of muscle stretch [GO:0035995]; mitotic chromosome condensation [GO:0007076]; muscle contraction [GO:0006936]; muscle filament sliding [GO:0030049]; platelet degranulati…	actin filament binding [GO:0051015]; actinin binding [GO:0042805]; ATP binding [GO:0005524]; calcium ion binding [GO:0005509]; calmodulin binding [GO:0005516]; enzyme binding [GO:0019899]; identical protein binding [GO:0042802]; muscle alpha-actinin binding [GO:0051371]; protease binding [GO:0002020]; protein kinase binding [GO:0019901]; protein self-association [GO:0043621]; protein serine/threo…	condensed nuclear chromosome [GO:0000794]; cytosol [GO:0005829]; extracellular exosome [GO:0070062]; extracellular region [GO:0005576]; I band [GO:0031674]; M band [GO:0031430]; striated muscle thin filament [GO:0005865]; Z disc [GO:0030018]	GO:0000794; GO:0002020; GO:0002576; GO:0003300; GO:0004674; GO:0004713; GO:0005509; GO:0005516; GO:0005524; GO:0005576; GO:0005829; GO:0005865; GO:0006936; GO:0006941; GO:0007076; GO:0008307; GO:0010628; GO:0010737; GO:0019899; GO:0019901; GO:0030018; GO:0030049; GO:0030240; GO:0030241; GO:0031430; GO:0031433; GO:0031674; GO:0035995; GO:0042802; GO:0042805; GO:0043621; GO:0045214; GO:0045859; GO:…	R-HSA-114608;R-HSA-390522;	hsa:7273;	Q8WZ42	0.996955	S265	PHKTPPRIPPKPKSRSPTPPSIAAKAQLARQ	11.747	12.1792	11.6893	12.1003	11.8509	11.268	11.4634	11.2318	11.2604	10.6467	11.3555	11.0576	11.5211	10.9779
TTN_Q8WZ42_S33201.1	-0.497308	0.929564	0.695751	1.47442	1.1533	-0.074972	0.637616	-0.803898	0.211859	-2	-0.28441	-0.0280388	-0.473775	-0.428677	TTN	Titin	Q8WZ42	1.04934	0.00590753	0.0985549	-0.818684	sp|Q8WZ42|TITIN_HUMAN Titin OS=Homo sapiens OX=9606 GN=TTN PE=1 SV=4	FUNCTION: Key component in the assembly and functioning of vertebrate striated muscles. By providing connections at the level of individual microfilaments, it contributes to the fine balance of forces between the two halves of the sarcomere. The size and extensibility of the cross-links are the main determinants of sarcomere extensibility properties of muscle. In non-muscle cells, seems to play a…	SUBCELLULAR LOCATION: Cytoplasm {ECO:0000305|PubMed:16410549}. Nucleus {ECO:0000269|PubMed:16410549}.	DISEASE: Myopathy, myofibrillar, 9, with early respiratory failure (MFM9) [MIM:603689]: An autosomal dominant myopathy characterized by adulthood onset of weakness in proximal, distal, axial and respiratory muscles. Pelvic girdle weakness, foot drop and neck weakness are the main symptoms at onset, but ultimately the weakness usually involves the proximal compartment of both upper and lower limbs…	cardiac muscle contraction [GO:0060048]; cardiac muscle fiber development [GO:0048739]; cardiac muscle hypertrophy [GO:0003300]; cardiac muscle tissue morphogenesis [GO:0055008]; cardiac myofibril assembly [GO:0055003]; detection of muscle stretch [GO:0035995]; mitotic chromosome condensation [GO:0007076]; muscle contraction [GO:0006936]; muscle filament sliding [GO:0030049]; platelet degranulati…	actin filament binding [GO:0051015]; actinin binding [GO:0042805]; ATP binding [GO:0005524]; calcium ion binding [GO:0005509]; calmodulin binding [GO:0005516]; enzyme binding [GO:0019899]; identical protein binding [GO:0042802]; muscle alpha-actinin binding [GO:0051371]; protease binding [GO:0002020]; protein kinase binding [GO:0019901]; protein self-association [GO:0043621]; protein serine/threo…	condensed nuclear chromosome [GO:0000794]; cytosol [GO:0005829]; extracellular exosome [GO:0070062]; extracellular region [GO:0005576]; I band [GO:0031674]; M band [GO:0031430]; striated muscle thin filament [GO:0005865]; Z disc [GO:0030018]	GO:0000794; GO:0002020; GO:0002576; GO:0003300; GO:0004674; GO:0004713; GO:0005509; GO:0005516; GO:0005524; GO:0005576; GO:0005829; GO:0005865; GO:0006936; GO:0006941; GO:0007076; GO:0008307; GO:0010628; GO:0010737; GO:0019899; GO:0019901; GO:0030018; GO:0030049; GO:0030240; GO:0030241; GO:0031430; GO:0031433; GO:0031674; GO:0035995; GO:0042802; GO:0042805; GO:0043621; GO:0045214; GO:0045859; GO:…	R-HSA-114608;R-HSA-390522;	hsa:7273;	Q8WZ42	0.999976	S33201	RESSSSASRLLRRRRSLSPTYIELMRPVSEL	16.6727	17.6194	17.4643	17.981	17.7679	16.9529	17.4257	16.4692	17.1432	15.3362	16.8139	16.984	16.6883	16.7182
HRC_P23327_S567	0.752332	1.79799	-0.232189	0.680604	1.04881	0.430925	0.584367	-1.72729	-0.449558	0.428517	-0.322199	-0.403114	-1.10835	-1.48084	HRC	Sarcoplasmic reticulum histidine-rich calcium-binding protein	P23327	1.04233	0.00629407	0.0985549	-0.590081	sp|P23327|SRCH_HUMAN Sarcoplasmic reticulum histidine-rich calcium-binding protein OS=Homo sapiens OX=9606 GN=HRC PE=1 SV=1	FUNCTION: May play a role in the regulation of calcium sequestration or release in the SR of skeletal and cardiac muscle.	SUBCELLULAR LOCATION: Sarcoplasmic reticulum lumen.		cellular protein metabolic process [GO:0044267]; muscle contraction [GO:0006936]; positive regulation of heart contraction [GO:0045823]; positive regulation of heart rate [GO:0010460]; positive regulation of relaxation of cardiac muscle [GO:1901899]; post-translational protein modification [GO:0043687]; regulation of calcium ion transmembrane transport [GO:1903169]; regulation of cardiac muscle c…	ATPase binding [GO:0051117]; calcium ion binding [GO:0005509]; ion channel binding [GO:0044325]	endoplasmic reticulum lumen [GO:0005788]; sarcoplasmic reticulum lumen [GO:0033018]; sarcoplasmic reticulum membrane [GO:0033017]; Z disc [GO:0030018]	GO:0002027; GO:0005509; GO:0005788; GO:0006936; GO:0010460; GO:0010880; GO:0010881; GO:0030018; GO:0033017; GO:0033018; GO:0033135; GO:0043687; GO:0044267; GO:0044325; GO:0045823; GO:0051117; GO:0051480; GO:0060314; GO:1901844; GO:1901899; GO:1903169	R-HSA-381426;R-HSA-8957275;	hsa:3270;	P23327	1	S567	REERAEVGAPLSPDHSEEEEEEEEGLEEDEP	14.5414	14.9679	14.1398	14.5121	14.6623	14.4103	14.4729	13.5299	14.0511	14.4093	14.103	14.07	13.7823	13.6304
PDE4B_Q07343_S140.1	-0.858982	-0.956435	-0.184087	-0.375185	-1.43981	-0.0750195	-0.736339	1.49591	0.11221	-1.02121	0.906975	1.42403	1.54305	0.164886	PDE4B	cAMP-specific 3',5'-cyclic phosphodiesterase 4B;cAMP-specific 3',5'-cyclic phosphodiesterase 4D	Q07343	1.14219	0.00696156	0.101588	1.33741	sp|Q07343|PDE4B_HUMAN cAMP-specific 3',5'-cyclic phosphodiesterase 4B OS=Homo sapiens OX=9606 GN=PDE4B PE=1 SV=1;sp|Q08499|PDE4D_HUMAN cAMP-specific 3',5'-cyclic phosphodiesterase 4D OS=Homo sapiens OX=9606 GN=PDE4D PE=1 SV=2	FUNCTION: Hydrolyzes the second messenger cAMP, which is a key regulator of many important physiological processes. May be involved in mediating central nervous system effects of therapeutic agents ranging from antidepressants to antiasthmatic and anti-inflammatory agents. {ECO:0000269|PubMed:10846163, ECO:0000269|PubMed:15003452}.			cAMP catabolic process [GO:0006198]; cellular response to drug [GO:0035690]; cellular response to epinephrine stimulus [GO:0071872]; cellular response to lipopolysaccharide [GO:0071222]; leukocyte migration [GO:0050900]; negative regulation of adenylate cyclase-activating adrenergic receptor signaling pathway involved in heart process [GO:0140199]; negative regulation of relaxation of cardiac mus…	3',5'-cyclic-AMP phosphodiesterase activity [GO:0004115]; 3',5'-cyclic-nucleotide phosphodiesterase activity [GO:0004114]; cAMP binding [GO:0030552]; gamma-tubulin binding [GO:0043015]; ion channel binding [GO:0044325]; metal ion binding [GO:0046872]	centrosome [GO:0005813]; cytosol [GO:0005829]; dendritic spine [GO:0043197]; excitatory synapse [GO:0060076]; gamma-tubulin complex [GO:0000930]; nucleus [GO:0005634]; perinuclear region of cytoplasm [GO:0048471]; postsynaptic density [GO:0014069]; synaptic vesicle [GO:0008021]; voltage-gated calcium channel complex [GO:0005891]; Z disc [GO:0030018]	GO:0000930; GO:0001780; GO:0004114; GO:0004115; GO:0005634; GO:0005813; GO:0005829; GO:0005891; GO:0006198; GO:0007165; GO:0008021; GO:0014069; GO:0030018; GO:0030552; GO:0030593; GO:0032729; GO:0032743; GO:0035690; GO:0043015; GO:0043197; GO:0044325; GO:0046872; GO:0048471; GO:0050852; GO:0050900; GO:0060076; GO:0071222; GO:0071872; GO:0086004; GO:0140199; GO:1901841; GO:1901898	R-HSA-180024;	hsa:5142;	Q07343;Q08499	0.904292	S140	PGHSQRRESFLYRSDSDYDLSPKAMSRNSSL	9.20558	9.10697	9.88851	9.69514	8.61784	9.99888	9.32969	11.5885	10.1883	9.04143	10.9926	11.5158	11.6362	10.2416
PDE4B_Q07343_S145.1	-0.858982	-0.956435	-0.184087	-0.375185	-1.43981	-0.0750195	-0.736339	1.49591	0.11221	-1.02121	0.906975	1.42403	1.54305	0.164886	PDE4B	cAMP-specific 3',5'-cyclic phosphodiesterase 4B;cAMP-specific 3',5'-cyclic phosphodiesterase 4D	Q07343	1.14219	0.00696156	0.101588	1.33741	sp|Q07343|PDE4B_HUMAN cAMP-specific 3',5'-cyclic phosphodiesterase 4B OS=Homo sapiens OX=9606 GN=PDE4B PE=1 SV=1;sp|Q08499|PDE4D_HUMAN cAMP-specific 3',5'-cyclic phosphodiesterase 4D OS=Homo sapiens OX=9606 GN=PDE4D PE=1 SV=2	FUNCTION: Hydrolyzes the second messenger cAMP, which is a key regulator of many important physiological processes. May be involved in mediating central nervous system effects of therapeutic agents ranging from antidepressants to antiasthmatic and anti-inflammatory agents. {ECO:0000269|PubMed:10846163, ECO:0000269|PubMed:15003452}.			cAMP catabolic process [GO:0006198]; cellular response to drug [GO:0035690]; cellular response to epinephrine stimulus [GO:0071872]; cellular response to lipopolysaccharide [GO:0071222]; leukocyte migration [GO:0050900]; negative regulation of adenylate cyclase-activating adrenergic receptor signaling pathway involved in heart process [GO:0140199]; negative regulation of relaxation of cardiac mus…	3',5'-cyclic-AMP phosphodiesterase activity [GO:0004115]; 3',5'-cyclic-nucleotide phosphodiesterase activity [GO:0004114]; cAMP binding [GO:0030552]; gamma-tubulin binding [GO:0043015]; ion channel binding [GO:0044325]; metal ion binding [GO:0046872]	centrosome [GO:0005813]; cytosol [GO:0005829]; dendritic spine [GO:0043197]; excitatory synapse [GO:0060076]; gamma-tubulin complex [GO:0000930]; nucleus [GO:0005634]; perinuclear region of cytoplasm [GO:0048471]; postsynaptic density [GO:0014069]; synaptic vesicle [GO:0008021]; voltage-gated calcium channel complex [GO:0005891]; Z disc [GO:0030018]	GO:0000930; GO:0001780; GO:0004114; GO:0004115; GO:0005634; GO:0005813; GO:0005829; GO:0005891; GO:0006198; GO:0007165; GO:0008021; GO:0014069; GO:0030018; GO:0030552; GO:0030593; GO:0032729; GO:0032743; GO:0035690; GO:0043015; GO:0043197; GO:0044325; GO:0046872; GO:0048471; GO:0050852; GO:0050900; GO:0060076; GO:0071222; GO:0071872; GO:0086004; GO:0140199; GO:1901841; GO:1901898	R-HSA-180024;	hsa:5142;	Q07343;Q08499	0.994092	S145	RRESFLYRSDSDYDLSPKAMSRNSSLPSEQH	9.20558	9.10697	9.88851	9.69514	8.61784	9.99888	9.32969	11.5885	10.1883	9.04143	10.9926	11.5158	11.6362	10.2416
JPH1_Q9HDC5_S165.1	-0.0214446	2	0.0718129	0.454097	1.20924	-0.163531	0.838148	-1.33419	-0.328725	0.600865	-0.959334	-0.794573	-1.54842	-0.117831	JPH1	Junctophilin-1	Q9HDC5	1.03988	0.00700065	0.101588	-0.556011	sp|Q9HDC5|JPH1_HUMAN Junctophilin-1 OS=Homo sapiens OX=9606 GN=JPH1 PE=1 SV=2	FUNCTION: Junctophilins contribute to the formation of junctional membrane complexes (JMCs) which link the plasma membrane with the endoplasmic or sarcoplasmic reticulum in excitable cells. Provides a structural foundation for functional cross-talk between the cell surface and intracellular calcium release channels. JPH1 contributes to the construction of the skeletal muscle triad by linking the …	SUBCELLULAR LOCATION: Cell membrane {ECO:0000250}; Peripheral membrane protein {ECO:0000250}. Endoplasmic reticulum membrane {ECO:0000250}; Single-pass type IV membrane protein {ECO:0000250}. Sarcoplasmic reticulum membrane {ECO:0000250}; Single-pass type IV membrane protein {ECO:0000250}. Note=Localized predominantly on the plasma membrane. The transmembrane domain is anchored in endoplasmic/sar…		calcium ion transport into cytosol [GO:0060402]; muscle organ development [GO:0007517]; regulation of ryanodine-sensitive calcium-release channel activity [GO:0060314]	structural constituent of muscle [GO:0008307]	endoplasmic reticulum membrane [GO:0005789]; integral component of membrane [GO:0016021]; junctional membrane complex [GO:0030314]; junctional sarcoplasmic reticulum membrane [GO:0014701]; nucleoplasm [GO:0005654]; plasma membrane [GO:0005886]; sarcoplasmic reticulum [GO:0016529]; Z disc [GO:0030018]	GO:0005654; GO:0005789; GO:0005886; GO:0007517; GO:0008307; GO:0014701; GO:0016021; GO:0016529; GO:0030018; GO:0030314; GO:0060314; GO:0060402		hsa:56704;	Q9HDC5	0.998654	S165	GMATVIRSPLRTSLASLRSEQSNGSVLHDAA	14.2093	15.1277	14.2497	14.4157	14.7436	14.1476	14.5825	13.6393	14.0758	14.4794	13.802	13.8736	13.5463	14.1674
MPRIP_Q6WCQ1_S220.1	-1.65503	-0.00368424	-0.68988	-0.572974	-0.535562	0.149525	-1.46693	0.126255	2	1.17798	0.582767	0.0750782	0.602766	-0.0001524	MPRIP	Myosin phosphatase Rho-interacting protein	Q6WCQ1	1.03855	0.00732506	0.102109	0.398623	sp|Q6WCQ1|MPRIP_HUMAN Myosin phosphatase Rho-interacting protein OS=Homo sapiens OX=9606 GN=MPRIP PE=1 SV=3	FUNCTION: Targets myosin phosphatase to the actin cytoskeleton. Required for the regulation of the actin cytoskeleton by RhoA and ROCK1. Depletion leads to an increased number of stress fibers in smooth muscle cells through stabilization of actin fibers by phosphorylated myosin. Overexpression of MRIP as well as its F-actin-binding region leads to disassembly of stress fibers in neuronal cells. {…	SUBCELLULAR LOCATION: Cytoplasm, cytoskeleton {ECO:0000269|PubMed:14506264, ECO:0000269|PubMed:16257966}. Note=Colocalizes with F-actin.		actin filament organization [GO:0007015]	actin filament binding [GO:0051015]; cadherin binding [GO:0045296]	actin cytoskeleton [GO:0015629]; cytosol [GO:0005829]; focal adhesion [GO:0005925]	GO:0005829; GO:0005925; GO:0007015; GO:0015629; GO:0045296; GO:0051015	R-HSA-6802952;	hsa:23164;	Q6WCQ1	0.792469	S220	QEEMRTKDQPDGSSLSPAQSPSQSQPPAASS	10.0564	10.539	10.3385	10.3726	10.3836	10.5838	10.1114	10.577	11.1858	10.8843	10.7104	10.562	10.7162	10.54
MPRIP_Q6WCQ1_S224.1	-1.65503	-0.00368424	-0.68988	-0.572974	-0.535562	0.149525	-1.46693	0.126255	2	1.17798	0.582767	0.0750782	0.602766	-0.0001524	MPRIP	Myosin phosphatase Rho-interacting protein	Q6WCQ1	1.03855	0.00732506	0.102109	0.398623	sp|Q6WCQ1|MPRIP_HUMAN Myosin phosphatase Rho-interacting protein OS=Homo sapiens OX=9606 GN=MPRIP PE=1 SV=3	FUNCTION: Targets myosin phosphatase to the actin cytoskeleton. Required for the regulation of the actin cytoskeleton by RhoA and ROCK1. Depletion leads to an increased number of stress fibers in smooth muscle cells through stabilization of actin fibers by phosphorylated myosin. Overexpression of MRIP as well as its F-actin-binding region leads to disassembly of stress fibers in neuronal cells. {…	SUBCELLULAR LOCATION: Cytoplasm, cytoskeleton {ECO:0000269|PubMed:14506264, ECO:0000269|PubMed:16257966}. Note=Colocalizes with F-actin.		actin filament organization [GO:0007015]	actin filament binding [GO:0051015]; cadherin binding [GO:0045296]	actin cytoskeleton [GO:0015629]; cytosol [GO:0005829]; focal adhesion [GO:0005925]	GO:0005829; GO:0005925; GO:0007015; GO:0015629; GO:0045296; GO:0051015	R-HSA-6802952;	hsa:23164;	Q6WCQ1	0.817016	S224	RTKDQPDGSSLSPAQSPSQSQPPAASSLREP	10.0564	10.539	10.3385	10.3726	10.3836	10.5838	10.1114	10.577	11.1858	10.8843	10.7104	10.562	10.7162	10.54
TTN_Q8WZ42_S33203.1	-0.240117	1.05423	0.76678	1.46336	1.15033	-0.199926	0.484637	-0.463585	0.0733197	-2	-0.466505	-0.0968311	-0.453434	-0.503856	TTN	Titin	Q8WZ42	1.04791	0.0079864	0.108303	-0.724067	sp|Q8WZ42|TITIN_HUMAN Titin OS=Homo sapiens OX=9606 GN=TTN PE=1 SV=4	FUNCTION: Key component in the assembly and functioning of vertebrate striated muscles. By providing connections at the level of individual microfilaments, it contributes to the fine balance of forces between the two halves of the sarcomere. The size and extensibility of the cross-links are the main determinants of sarcomere extensibility properties of muscle. In non-muscle cells, seems to play a…	SUBCELLULAR LOCATION: Cytoplasm {ECO:0000305|PubMed:16410549}. Nucleus {ECO:0000269|PubMed:16410549}.	DISEASE: Myopathy, myofibrillar, 9, with early respiratory failure (MFM9) [MIM:603689]: An autosomal dominant myopathy characterized by adulthood onset of weakness in proximal, distal, axial and respiratory muscles. Pelvic girdle weakness, foot drop and neck weakness are the main symptoms at onset, but ultimately the weakness usually involves the proximal compartment of both upper and lower limbs…	cardiac muscle contraction [GO:0060048]; cardiac muscle fiber development [GO:0048739]; cardiac muscle hypertrophy [GO:0003300]; cardiac muscle tissue morphogenesis [GO:0055008]; cardiac myofibril assembly [GO:0055003]; detection of muscle stretch [GO:0035995]; mitotic chromosome condensation [GO:0007076]; muscle contraction [GO:0006936]; muscle filament sliding [GO:0030049]; platelet degranulati…	actin filament binding [GO:0051015]; actinin binding [GO:0042805]; ATP binding [GO:0005524]; calcium ion binding [GO:0005509]; calmodulin binding [GO:0005516]; enzyme binding [GO:0019899]; identical protein binding [GO:0042802]; muscle alpha-actinin binding [GO:0051371]; protease binding [GO:0002020]; protein kinase binding [GO:0019901]; protein self-association [GO:0043621]; protein serine/threo…	condensed nuclear chromosome [GO:0000794]; cytosol [GO:0005829]; extracellular exosome [GO:0070062]; extracellular region [GO:0005576]; I band [GO:0031674]; M band [GO:0031430]; striated muscle thin filament [GO:0005865]; Z disc [GO:0030018]	GO:0000794; GO:0002020; GO:0002576; GO:0003300; GO:0004674; GO:0004713; GO:0005509; GO:0005516; GO:0005524; GO:0005576; GO:0005829; GO:0005865; GO:0006936; GO:0006941; GO:0007076; GO:0008307; GO:0010628; GO:0010737; GO:0019899; GO:0019901; GO:0030018; GO:0030049; GO:0030240; GO:0030241; GO:0031430; GO:0031433; GO:0031674; GO:0035995; GO:0042802; GO:0042805; GO:0043621; GO:0045214; GO:0045859; GO:…	R-HSA-114608;R-HSA-390522;	hsa:7273;	Q8WZ42	0.944755	S33203	SSSSASRLLRRRRSLSPTYIELMRPVSELIR	15.3403	16.0727	15.91	16.3041	16.127	15.3631	15.7504	15.2139	15.5177	14.0231	15.2123	15.4214	15.2197	15.1911

## Sheet: (B) Patient heatmap phos-sites 
FEATURE	H2923	H5362	H2929	H5219	H5179	C2867	C2884	C2879	C2880	C3045	GENE	PROTEIN	UNIPROT	ADJ.P.VAL	LOGFC	FASTA_HEADERS	UNIPROT_FUNCTION	UNIPROT_CELLULAR_LOCATION	UNIPROT_DISEASE	GO_BIOLOGICAL_PROCESS	GO_MOLECULAR_FUNCTION	GO_CELLULAR_COMPONENT	GO_ID	PROTEINS	LOCALIZATION PROBABILITY	AMINO ACID	PEPTIDE SEQUENCE	H2923.1	H5362.1	H2929.1	H5219.1	H5179.1	C2867.1	C2884.1	C2879.1	C2880.1	C3045.1
SYNPO2_Q9UMS6_S226.1	0.906587	1.17195	0.548622	0.8317	1.05956	-0.89434	-1.4995	-0.960719	-0.439377	-0.724489	SYNPO2	Synaptopodin-2	Q9UMS6	0.000379524	2.71664	sp|Q9UMS6|SYNP2_HUMAN Synaptopodin-2 OS=Homo sapiens OX=9606 GN=SYNPO2 PE=1 SV=2	FUNCTION: Has an actin-binding and actin-bundling activity. Can induce the formation of F-actin networks in an isoform-specific manner (PubMed:24005909, PubMed:23225103). At the sarcomeric Z lines is proposed to act as adapter protein that links nascent myofibers to the sarcolemma via ZYX and may play a role in early assembly and stabilization of the Z lines. Involved in autophagosome formation. …	SUBCELLULAR LOCATION: Nucleus {ECO:0000250|UniProtKB:Q91YE8}. Cytoplasm {ECO:0000250|UniProtKB:Q91YE8}. Cytoplasm, cytoskeleton {ECO:0000269|PubMed:24005909}. Cytoplasm, myofibril, sarcomere, Z line {ECO:0000269|PubMed:20554076}. Cell junction, focal adhesion {ECO:0000269|PubMed:20554076}. Note=Shuttles between the nucleus and the cytoplasm in a differentiation-dependent and stress-induced fashio…		autophagosome assembly [GO:0000045]; chaperone-mediated autophagy [GO:0061684]; positive regulation of actin filament bundle assembly [GO:0032233]; positive regulation of cell migration [GO:0030335]; regulation of Rho-dependent protein serine/threonine kinase activity [GO:2000298]	14-3-3 protein binding [GO:0071889]; actin binding [GO:0003779]; alpha-actinin binding [GO:0051393]; filamin binding [GO:0031005]; muscle alpha-actinin binding [GO:0051371]; protein-macromolecule adaptor activity [GO:0030674]	actin cytoskeleton [GO:0015629]; cytosol [GO:0005829]; focal adhesion [GO:0005925]; intracellular membrane-bounded organelle [GO:0043231]; nucleoplasm [GO:0005654]; nucleus [GO:0005634]; stress fiber [GO:0001725]; vesicle tethering complex [GO:0099023]; Z disc [GO:0030018]	GO:0000045; GO:0001725; GO:0003779; GO:0005634; GO:0005654; GO:0005829; GO:0005925; GO:0015629; GO:0030018; GO:0030335; GO:0030674; GO:0031005; GO:0032233; GO:0043231; GO:0051371; GO:0051393; GO:0061684; GO:0071889; GO:0099023; GO:2000298	Q9UMS6	0.984082	S226	ASGPLVALPGAEKSKSPDPDPNLSHDRIVHI	13.7953	14.1942	13.2573	13.6828	14.0253	11.0884	10.1788	10.9886	11.7722	11.3437
SYNPO2_Q9UMS6_S234.1	0.906587	1.17195	0.548622	0.8317	1.05956	-0.89434	-1.4995	-0.960719	-0.439377	-0.724489	SYNPO2	Synaptopodin-2	Q9UMS6	0.000379524	2.71664	sp|Q9UMS6|SYNP2_HUMAN Synaptopodin-2 OS=Homo sapiens OX=9606 GN=SYNPO2 PE=1 SV=2	FUNCTION: Has an actin-binding and actin-bundling activity. Can induce the formation of F-actin networks in an isoform-specific manner (PubMed:24005909, PubMed:23225103). At the sarcomeric Z lines is proposed to act as adapter protein that links nascent myofibers to the sarcolemma via ZYX and may play a role in early assembly and stabilization of the Z lines. Involved in autophagosome formation. …	SUBCELLULAR LOCATION: Nucleus {ECO:0000250|UniProtKB:Q91YE8}. Cytoplasm {ECO:0000250|UniProtKB:Q91YE8}. Cytoplasm, cytoskeleton {ECO:0000269|PubMed:24005909}. Cytoplasm, myofibril, sarcomere, Z line {ECO:0000269|PubMed:20554076}. Cell junction, focal adhesion {ECO:0000269|PubMed:20554076}. Note=Shuttles between the nucleus and the cytoplasm in a differentiation-dependent and stress-induced fashio…		autophagosome assembly [GO:0000045]; chaperone-mediated autophagy [GO:0061684]; positive regulation of actin filament bundle assembly [GO:0032233]; positive regulation of cell migration [GO:0030335]; regulation of Rho-dependent protein serine/threonine kinase activity [GO:2000298]	14-3-3 protein binding [GO:0071889]; actin binding [GO:0003779]; alpha-actinin binding [GO:0051393]; filamin binding [GO:0031005]; muscle alpha-actinin binding [GO:0051371]; protein-macromolecule adaptor activity [GO:0030674]	actin cytoskeleton [GO:0015629]; cytosol [GO:0005829]; focal adhesion [GO:0005925]; intracellular membrane-bounded organelle [GO:0043231]; nucleoplasm [GO:0005654]; nucleus [GO:0005634]; stress fiber [GO:0001725]; vesicle tethering complex [GO:0099023]; Z disc [GO:0030018]	GO:0000045; GO:0001725; GO:0003779; GO:0005634; GO:0005654; GO:0005829; GO:0005925; GO:0015629; GO:0030018; GO:0030335; GO:0030674; GO:0031005; GO:0032233; GO:0043231; GO:0051371; GO:0051393; GO:0061684; GO:0071889; GO:0099023; GO:2000298	Q9UMS6	0.999872	S234	PGAEKSKSPDPDPNLSHDRIVHINSIPTNEK	13.7953	14.1942	13.2573	13.6828	14.0253	11.0884	10.1788	10.9886	11.7722	11.3437
CALD1_Q05682_S789	0.853428	1.58913	0.364531	0.741984	0.935362	-0.914104	-1.24087	-0.743664	-0.826576	-0.759219	CALD1	Caldesmon	Q05682	0.000635173	2.28387	sp|Q05682|CALD1_HUMAN Caldesmon OS=Homo sapiens OX=9606 GN=CALD1 PE=1 SV=3	FUNCTION: Actin- and myosin-binding protein implicated in the regulation of actomyosin interactions in smooth muscle and nonmuscle cells (could act as a bridge between myosin and actin filaments). Stimulates actin binding of tropomyosin which increases the stabilization of actin filament structure. In muscle tissues, inhibits the actomyosin ATPase by binding to F-actin. This inhibition is attenua…	SUBCELLULAR LOCATION: Cytoplasm, cytoskeleton {ECO:0000250|UniProtKB:P13505}. Cytoplasm, myofibril {ECO:0000250|UniProtKB:P13505}. Cytoplasm, cytoskeleton, stress fiber {ECO:0000250|UniProtKB:P13505}. Note=On thin filaments in smooth muscle and on stress fibers in fibroblasts (nonmuscle). {ECO:0000250|UniProtKB:P13505}.		actin filament bundle assembly [GO:0051017]; angiogenesis [GO:0001525]; muscle contraction [GO:0006936]	actin binding [GO:0003779]; cadherin binding [GO:0045296]; calmodulin binding [GO:0005516]; myosin binding [GO:0017022]; tropomyosin binding [GO:0005523]	actin cap [GO:0030478]; actin cytoskeleton [GO:0015629]; cytoskeleton [GO:0005856]; cytosol [GO:0005829]; myofibril [GO:0030016]; plasma membrane [GO:0005886]	GO:0001525; GO:0003779; GO:0005516; GO:0005523; GO:0005829; GO:0005856; GO:0005886; GO:0006936; GO:0015629; GO:0017022; GO:0030016; GO:0030478; GO:0045296; GO:0051017	Q05682	0.90618	S789	SKRNLWEKQSVDKVTSPTKV___________	16.9648	17.9015	16.3423	16.8229	17.0691	14.7143	14.2983	14.9313	14.8257	14.9115
SYNPO2_Q9UMS6_S204	0.911485	0.679984	1.39642	0.795773	0.65146	-1.50914	-1.1436	-0.749286	-0.419673	-0.613425	SYNPO2	Synaptopodin-2	Q9UMS6	0.000935045	2.46602	sp|Q9UMS6|SYNP2_HUMAN Synaptopodin-2 OS=Homo sapiens OX=9606 GN=SYNPO2 PE=1 SV=2	FUNCTION: Has an actin-binding and actin-bundling activity. Can induce the formation of F-actin networks in an isoform-specific manner (PubMed:24005909, PubMed:23225103). At the sarcomeric Z lines is proposed to act as adapter protein that links nascent myofibers to the sarcolemma via ZYX and may play a role in early assembly and stabilization of the Z lines. Involved in autophagosome formation. …	SUBCELLULAR LOCATION: Nucleus {ECO:0000250|UniProtKB:Q91YE8}. Cytoplasm {ECO:0000250|UniProtKB:Q91YE8}. Cytoplasm, cytoskeleton {ECO:0000269|PubMed:24005909}. Cytoplasm, myofibril, sarcomere, Z line {ECO:0000269|PubMed:20554076}. Cell junction, focal adhesion {ECO:0000269|PubMed:20554076}. Note=Shuttles between the nucleus and the cytoplasm in a differentiation-dependent and stress-induced fashio…		autophagosome assembly [GO:0000045]; chaperone-mediated autophagy [GO:0061684]; positive regulation of actin filament bundle assembly [GO:0032233]; positive regulation of cell migration [GO:0030335]; regulation of Rho-dependent protein serine/threonine kinase activity [GO:2000298]	14-3-3 protein binding [GO:0071889]; actin binding [GO:0003779]; alpha-actinin binding [GO:0051393]; filamin binding [GO:0031005]; muscle alpha-actinin binding [GO:0051371]; protein-macromolecule adaptor activity [GO:0030674]	actin cytoskeleton [GO:0015629]; cytosol [GO:0005829]; focal adhesion [GO:0005925]; intracellular membrane-bounded organelle [GO:0043231]; nucleoplasm [GO:0005654]; nucleus [GO:0005634]; stress fiber [GO:0001725]; vesicle tethering complex [GO:0099023]; Z disc [GO:0030018]	GO:0000045; GO:0001725; GO:0003779; GO:0005634; GO:0005654; GO:0005829; GO:0005925; GO:0015629; GO:0030018; GO:0030335; GO:0030674; GO:0031005; GO:0032233; GO:0043231; GO:0051371; GO:0051393; GO:0061684; GO:0071889; GO:0099023; GO:2000298	Q9UMS6	0.957156	S204	EAVQPGPVVELQLSLSQERHKGASGPLVALP	13.5686	13.2468	14.2427	13.4077	13.2071	10.2038	10.7119	11.26	11.7182	11.4489
TTN_Q8WZ42_S597	1.12829	1.03797	1.4115	0.49545	0.366089	-1.01887	-1.0826	-0.468814	-0.709468	-1.15953	TTN	Titin	Q8WZ42	0.00129746	1.83456	sp|Q8WZ42|TITIN_HUMAN Titin OS=Homo sapiens OX=9606 GN=TTN PE=1 SV=4	FUNCTION: Key component in the assembly and functioning of vertebrate striated muscles. By providing connections at the level of individual microfilaments, it contributes to the fine balance of forces between the two halves of the sarcomere. The size and extensibility of the cross-links are the main determinants of sarcomere extensibility properties of muscle. In non-muscle cells, seems to play a…	SUBCELLULAR LOCATION: Cytoplasm {ECO:0000305|PubMed:16410549}. Nucleus {ECO:0000269|PubMed:16410549}.	DISEASE: Myopathy, myofibrillar, 9, with early respiratory failure (MFM9) [MIM:603689]: An autosomal dominant myopathy characterized by adulthood onset of weakness in proximal, distal, axial and respiratory muscles. Pelvic girdle weakness, foot drop and neck weakness are the main symptoms at onset, but ultimately the weakness usually involves the proximal compartment of both upper and lower limbs…	cardiac muscle cell development [GO:0055013]; cardiac muscle contraction [GO:0060048]; cardiac muscle hypertrophy [GO:0003300]; cardiac muscle tissue morphogenesis [GO:0055008]; cardiac myofibril assembly [GO:0055003]; detection of muscle stretch [GO:0035995]; mitotic chromosome condensation [GO:0007076]; muscle contraction [GO:0006936]; positive regulation of gene expression [GO:0010628]; positi…	actin filament binding [GO:0051015]; actinin binding [GO:0042805]; ATP binding [GO:0005524]; calcium ion binding [GO:0005509]; calmodulin binding [GO:0005516]; enzyme binding [GO:0019899]; identical protein binding [GO:0042802]; muscle alpha-actinin binding [GO:0051371]; protease binding [GO:0002020]; protein kinase binding [GO:0019901]; protein self-association [GO:0043621]; protein serine kinas…	condensed nuclear chromosome [GO:0000794]; cytosol [GO:0005829]; extracellular exosome [GO:0070062]; extracellular region [GO:0005576]; I band [GO:0031674]; M band [GO:0031430]; striated muscle thin filament [GO:0005865]; titin-telethonin complex [GO:1990733]; Z disc [GO:0030018]	GO:0000794; GO:0002020; GO:0003300; GO:0004674; GO:0004713; GO:0005509; GO:0005516; GO:0005524; GO:0005576; GO:0005829; GO:0005865; GO:0006936; GO:0006941; GO:0007076; GO:0008307; GO:0010628; GO:0010737; GO:0019899; GO:0019901; GO:0030018; GO:0030240; GO:0030241; GO:0031430; GO:0031433; GO:0031674; GO:0035995; GO:0042802; GO:0042805; GO:0043621; GO:0045214; GO:0045859; GO:0048769; GO:0050714; GO:…	Q8WZ42	0.999999	S597	GAQEETTTQQDQMHLSYEKIMKETRKTVVPK	16.3096	16.2162	16.6022	15.6558	15.5221	14.0913	14.0254	14.6595	14.4109	13.9459
AKAP12_Q02952_T285.1	0.486217	1.66613	0.622179	0.786268	0.864648	-1.16128	-1.20284	-0.773415	-0.567299	-0.720605	AKAP12	A-kinase anchor protein 12	Q02952	0.00168932	1.66567	sp|Q02952|AKA12_HUMAN A-kinase anchor protein 12 OS=Homo sapiens OX=9606 GN=AKAP12 PE=1 SV=4	FUNCTION: Anchoring protein that mediates the subcellular compartmentation of protein kinase A (PKA) and protein kinase C (PKC).	SUBCELLULAR LOCATION: Cytoplasm, cell cortex {ECO:0000305}. Cytoplasm, cytoskeleton {ECO:0000305}. Membrane {ECO:0000305}; Lipid-anchor {ECO:0000305}. Note=May be part of the cortical cytoskeleton.		adenylate cyclase-inhibiting G protein-coupled receptor signaling pathway [GO:0007193]; cellular response to interleukin-1 [GO:0071347]; cellular response to tumor necrosis factor [GO:0071356]; G protein-coupled receptor signaling pathway [GO:0007186]; hepatic stellate cell activation [GO:0035733]; modulation of chemical synaptic transmission [GO:0050804]; negative regulation of vascular permeabi…	adenylate cyclase binding [GO:0008179]; calmodulin binding [GO:0005516]; protein kinase A binding [GO:0051018]	cell cortex [GO:0005938]; cytoplasm [GO:0005737]; cytoskeleton [GO:0005856]; cytosol [GO:0005829]; focal adhesion [GO:0005925]; neuronal cell body [GO:0043025]; plasma membrane [GO:0005886]; Schaffer collateral - CA1 synapse [GO:0098685]	GO:0005516; GO:0005737; GO:0005829; GO:0005856; GO:0005886; GO:0005925; GO:0005938; GO:0007165; GO:0007186; GO:0007193; GO:0008179; GO:0010738; GO:0010739; GO:0032496; GO:0032760; GO:0035733; GO:0043025; GO:0043116; GO:0050804; GO:0051018; GO:0051602; GO:0051770; GO:0061870; GO:0070374; GO:0071347; GO:0071356; GO:0090036; GO:0098685; GO:1900143	Q02952	0.926736	T285	EEKQEKEPSKSAESPTSPVTSETGSTFKKFF	15.0529	16.1632	15.1809	15.3353	15.409	13.5027	13.4636	13.8677	14.0616	13.9174
CACNB2_Q08289_S550.1	-1.45751	-1.17357	-0.860319	-0.321425	-0.609331	0.987018	0.984857	0.438576	0.757178	1.25453	CACNB2	Voltage-dependent L-type calcium channel subunit beta-2	Q08289	0.00170019	-1.65855	sp|Q08289|CACB2_HUMAN Voltage-dependent L-type calcium channel subunit beta-2 OS=Homo sapiens OX=9606 GN=CACNB2 PE=1 SV=3	FUNCTION: The beta subunit of voltage-dependent calcium channels contributes to the function of the calcium channel by increasing peak calcium current, shifting the voltage dependencies of activation and inactivation, modulating G protein inhibition and controlling the alpha-1 subunit membrane targeting.	SUBCELLULAR LOCATION: Cell membrane, sarcolemma {ECO:0000250}; Peripheral membrane protein {ECO:0000250}; Cytoplasmic side {ECO:0000250}.	DISEASE: Brugada syndrome 4 (BRGDA4) [MIM:611876]: A heart disease characterized by the association of Brugada syndrome with shortened QT intervals. Brugada syndrome is a tachyarrhythmia characterized by right bundle branch block and ST segment elevation on an electrocardiogram (ECG). It can cause the ventricles to beat so fast that the blood is prevented from circulating efficiently in the body.…	calcium ion import [GO:0070509]; chemical synaptic transmission [GO:0007268]; membrane depolarization during atrial cardiac muscle cell action potential [GO:0098912]; membrane depolarization during AV node cell action potential [GO:0086045]; neuromuscular junction development [GO:0007528]; positive regulation of calcium ion transmembrane transport via high voltage-gated calcium channel [GO:190487…	actin filament binding [GO:0051015]; calcium channel activity [GO:0005262]; voltage-gated calcium channel activity [GO:0005245]; voltage-gated calcium channel activity involved in positive regulation of presynaptic cytosolic calcium levels [GO:0099635]	integral component of plasma membrane [GO:0005887]; L-type voltage-gated calcium channel complex [GO:1990454]; photoreceptor ribbon synapse [GO:0098684]; plasma membrane [GO:0005886]; presynapse [GO:0098793]; voltage-gated calcium channel complex [GO:0005891]	GO:0005245; GO:0005262; GO:0005886; GO:0005887; GO:0005891; GO:0007268; GO:0007528; GO:0007601; GO:0051015; GO:0051928; GO:0070509; GO:0072659; GO:0086045; GO:0086091; GO:0098684; GO:0098793; GO:0098912; GO:0099635; GO:1901385; GO:1901843; GO:1904879; GO:1990454	Q08289	0.999742	S550	SAPHHNHRSGTSRGLSRQETFDSETQESRDS	11.4971	11.7633	12.057	12.5623	12.2924	13.7892	13.7871	13.2749	13.5737	14.04
SYNPO2_Q9UMS6_S234	1.03467	1.25405	0.621293	1.00644	0.490584	-0.794732	-1.39325	-0.808746	-0.207216	-1.2031	SYNPO2	Synaptopodin-2	Q9UMS6	0.00203404	1.49328	sp|Q9UMS6|SYNP2_HUMAN Synaptopodin-2 OS=Homo sapiens OX=9606 GN=SYNPO2 PE=1 SV=2	FUNCTION: Has an actin-binding and actin-bundling activity. Can induce the formation of F-actin networks in an isoform-specific manner (PubMed:24005909, PubMed:23225103). At the sarcomeric Z lines is proposed to act as adapter protein that links nascent myofibers to the sarcolemma via ZYX and may play a role in early assembly and stabilization of the Z lines. Involved in autophagosome formation. …	SUBCELLULAR LOCATION: Nucleus {ECO:0000250|UniProtKB:Q91YE8}. Cytoplasm {ECO:0000250|UniProtKB:Q91YE8}. Cytoplasm, cytoskeleton {ECO:0000269|PubMed:24005909}. Cytoplasm, myofibril, sarcomere, Z line {ECO:0000269|PubMed:20554076}. Cell junction, focal adhesion {ECO:0000269|PubMed:20554076}. Note=Shuttles between the nucleus and the cytoplasm in a differentiation-dependent and stress-induced fashio…		autophagosome assembly [GO:0000045]; chaperone-mediated autophagy [GO:0061684]; positive regulation of actin filament bundle assembly [GO:0032233]; positive regulation of cell migration [GO:0030335]; regulation of Rho-dependent protein serine/threonine kinase activity [GO:2000298]	14-3-3 protein binding [GO:0071889]; actin binding [GO:0003779]; alpha-actinin binding [GO:0051393]; filamin binding [GO:0031005]; muscle alpha-actinin binding [GO:0051371]; protein-macromolecule adaptor activity [GO:0030674]	actin cytoskeleton [GO:0015629]; cytosol [GO:0005829]; focal adhesion [GO:0005925]; intracellular membrane-bounded organelle [GO:0043231]; nucleoplasm [GO:0005654]; nucleus [GO:0005634]; stress fiber [GO:0001725]; vesicle tethering complex [GO:0099023]; Z disc [GO:0030018]	GO:0000045; GO:0001725; GO:0003779; GO:0005634; GO:0005654; GO:0005829; GO:0005925; GO:0015629; GO:0030018; GO:0030335; GO:0030674; GO:0031005; GO:0032233; GO:0043231; GO:0051371; GO:0051393; GO:0061684; GO:0071889; GO:0099023; GO:2000298	Q9UMS6	0.999872	S234	PGAEKSKSPDPDPNLSHDRIVHINSIPTNEK	12.175	12.3608	11.8248	12.1511	11.7141	10.6253	10.1183	10.6134	11.123	10.2793
AKAP12_Q02952_S283.1	0.520451	1.6075	0.546072	0.727465	0.973782	-1.32096	-1.19321	-0.646567	-0.457026	-0.757506	AKAP12	A-kinase anchor protein 12	Q02952	0.00274913	1.30975	sp|Q02952|AKA12_HUMAN A-kinase anchor protein 12 OS=Homo sapiens OX=9606 GN=AKAP12 PE=1 SV=4	FUNCTION: Anchoring protein that mediates the subcellular compartmentation of protein kinase A (PKA) and protein kinase C (PKC).	SUBCELLULAR LOCATION: Cytoplasm, cell cortex {ECO:0000305}. Cytoplasm, cytoskeleton {ECO:0000305}. Membrane {ECO:0000305}; Lipid-anchor {ECO:0000305}. Note=May be part of the cortical cytoskeleton.		adenylate cyclase-inhibiting G protein-coupled receptor signaling pathway [GO:0007193]; cellular response to interleukin-1 [GO:0071347]; cellular response to tumor necrosis factor [GO:0071356]; G protein-coupled receptor signaling pathway [GO:0007186]; hepatic stellate cell activation [GO:0035733]; modulation of chemical synaptic transmission [GO:0050804]; negative regulation of vascular permeabi…	adenylate cyclase binding [GO:0008179]; calmodulin binding [GO:0005516]; protein kinase A binding [GO:0051018]	cell cortex [GO:0005938]; cytoplasm [GO:0005737]; cytoskeleton [GO:0005856]; cytosol [GO:0005829]; focal adhesion [GO:0005925]; neuronal cell body [GO:0043025]; plasma membrane [GO:0005886]; Schaffer collateral - CA1 synapse [GO:0098685]	GO:0005516; GO:0005737; GO:0005829; GO:0005856; GO:0005886; GO:0005925; GO:0005938; GO:0007165; GO:0007186; GO:0007193; GO:0008179; GO:0010738; GO:0010739; GO:0032496; GO:0032760; GO:0035733; GO:0043025; GO:0043116; GO:0050804; GO:0051018; GO:0051602; GO:0051770; GO:0061870; GO:0070374; GO:0071347; GO:0071356; GO:0090036; GO:0098685; GO:1900143	Q02952	0.842687	S283	EGEEKQEKEPSKSAESPTSPVTSETGSTFKK	13.866	14.6795	13.8851	14.0209	14.2052	12.4879	12.5835	12.9926	13.1344	12.9096
MYL2_P10916_S19	-1.329	-1.43092	-0.638138	-0.409268	-0.487339	0.906381	1.21862	0.146973	1.00093	1.02176	MYL2	Myosin regulatory light chain 2, ventricular/cardiac muscle isoform	P10916	0.00285103	-1.88728	sp|P10916|MLRV_HUMAN Myosin regulatory light chain 2, ventricular/cardiac muscle isoform OS=Homo sapiens OX=9606 GN=MYL2 PE=1 SV=3	FUNCTION: Contractile protein that plays a role in heart development and function (PubMed:23365102, PubMed:32453731). Following phosphorylation, plays a role in cross-bridge cycling kinetics and cardiac muscle contraction by increasing myosin lever arm stiffness and promoting myosin head diffusion; as a consequence of the increase in maximum contraction force and calcium sensitivity of contractio…	SUBCELLULAR LOCATION: Cytoplasm, myofibril, sarcomere, A band {ECO:0000250|UniProtKB:P08733}.	DISEASE: Cardiomyopathy, familial hypertrophic 10 (CMH10) [MIM:608758]: A hereditary heart disorder characterized by ventricular hypertrophy, which is usually asymmetric and often involves the interventricular septum. The symptoms include dyspnea, syncope, collapse, palpitations, and chest pain. They can be readily provoked by exercise. The disorder has inter- and intrafamilial variability rangin…	cardiac muscle contraction [GO:0060048]; cardiac myofibril assembly [GO:0055003]; heart contraction [GO:0060047]; heart development [GO:0007507]; muscle cell fate specification [GO:0042694]; negative regulation of cell growth [GO:0030308]; positive regulation of the force of heart contraction [GO:0098735]; regulation of striated muscle contraction [GO:0006942]; regulation of the force of heart co…	actin monomer binding [GO:0003785]; calcium ion binding [GO:0005509]; myosin heavy chain binding [GO:0032036]; structural constituent of muscle [GO:0008307]	A band [GO:0031672]; cardiac myofibril [GO:0097512]; cytoplasm [GO:0005737]; cytoskeleton [GO:0005856]; cytosol [GO:0005829]; myofibril [GO:0030016]; myosin complex [GO:0016459]; sarcomere [GO:0030017]	GO:0002026; GO:0003785; GO:0005509; GO:0005737; GO:0005829; GO:0005856; GO:0006942; GO:0007507; GO:0008307; GO:0016459; GO:0030016; GO:0030017; GO:0030308; GO:0031672; GO:0032036; GO:0042694; GO:0055003; GO:0055010; GO:0060047; GO:0060048; GO:0097512; GO:0098735	P10916	0.810615	S19	KKAKKRAGGANSNVFSMFEQTQIQEFKEAFT	11.5385	11.4266	12.2975	12.549	12.4632	13.9944	14.3374	13.1601	14.0982	14.1211
PPP1R12B_O60237_S711	-1.08523	-1.58007	-0.896804	-0.22886	-0.576094	1.14435	0.846317	0.880775	0.418306	1.07731	PPP1R12B	Protein phosphatase 1 regulatory subunit 12B	O60237	0.00348098	-1.19393	sp|O60237|MYPT2_HUMAN Protein phosphatase 1 regulatory subunit 12B OS=Homo sapiens OX=9606 GN=PPP1R12B PE=1 SV=2	FUNCTION: Regulates myosin phosphatase activity. Augments Ca(2+) sensitivity of the contractile apparatus. {ECO:0000269|PubMed:11067852, ECO:0000269|PubMed:9570949}.	SUBCELLULAR LOCATION: Cytoplasm, cytoskeleton {ECO:0000269|PubMed:12923170}. Cytoplasm, cytoskeleton, stress fiber {ECO:0000269|PubMed:12923170}. Note=Along actomyosin filaments. {ECO:0000269|PubMed:12923170}.		regulation of muscle contraction [GO:0006937]; signal transduction [GO:0007165]	enzyme activator activity [GO:0008047]; enzyme inhibitor activity [GO:0004857]; phosphatase regulator activity [GO:0019208]; protein kinase binding [GO:0019901]	A band [GO:0031672]; cytoplasm [GO:0005737]; cytoskeleton [GO:0005856]; cytosol [GO:0005829]; nucleoplasm [GO:0005654]; Z disc [GO:0030018]	GO:0004857; GO:0005654; GO:0005737; GO:0005829; GO:0005856; GO:0006937; GO:0007165; GO:0008047; GO:0019208; GO:0019901; GO:0030018; GO:0031672	O60237	1	S711	VPATEAGEGQQPWGRSLDEEPICHRLRCPAQ	11.5133	11.1751	11.6421	12.0986	11.8613	13.0372	12.8335	12.857	12.5409	12.9914
CACNA1C_Q13936_S1784	-1.15421	-1.18088	-1.22666	0.0266944	-0.699392	0.61277	0.999422	1.29364	0.246958	1.08165	CACNA1C	Voltage-dependent L-type calcium channel subunit alpha-1C	Q13936	0.00473052	-1.58451	sp|Q13936|CAC1C_HUMAN Voltage-dependent L-type calcium channel subunit alpha-1C OS=Homo sapiens OX=9606 GN=CACNA1C PE=1 SV=4	FUNCTION: Pore-forming, alpha-1C subunit of the voltage-gated calcium channel that gives rise to L-type calcium currents (PubMed:8392192, PubMed:7737988, PubMed:9087614, PubMed:9013606, PubMed:9607315, PubMed:12176756, PubMed:17071743, PubMed:11741969, PubMed:8099908, PubMed:12181424, PubMed:29078335, PubMed:29742403, PubMed:16299511, PubMed:20953164, PubMed:15454078, PubMed:15863612, PubMed:1722…	SUBCELLULAR LOCATION: Cell membrane {ECO:0000269|PubMed:11741969, ECO:0000269|PubMed:12176756, ECO:0000269|PubMed:12181424, ECO:0000269|PubMed:15454078, ECO:0000269|PubMed:15863612, ECO:0000269|PubMed:16299511, ECO:0000269|PubMed:17071743, ECO:0000269|PubMed:17224476, ECO:0000269|PubMed:20953164, ECO:0000269|PubMed:24728418, ECO:0000269|PubMed:26253506, ECO:0000269|PubMed:27218670, ECO:0000269|Pu…	DISEASE: Timothy syndrome (TS) [MIM:601005]: Disorder characterized by multiorgan dysfunction including lethal arrhythmias, webbing of fingers and toes, congenital heart disease, immune deficiency, intermittent hypoglycemia, cognitive abnormalities and autism. {ECO:0000269|PubMed:15454078, ECO:0000269|PubMed:15863612, ECO:0000269|PubMed:25260352, ECO:0000269|PubMed:26253506}. Note=The disease is …	calcium ion import across plasma membrane [GO:0098703]; calcium ion transmembrane transport [GO:0070588]; calcium ion transmembrane transport via high voltage-gated calcium channel [GO:0061577]; calcium ion transport into cytosol [GO:0060402]; calcium-mediated signaling using extracellular calcium source [GO:0035585]; camera-type eye development [GO:0043010]; cardiac conduction [GO:0061337]; card…	alpha-actinin binding [GO:0051393]; calmodulin binding [GO:0005516]; high voltage-gated calcium channel activity [GO:0008331]; metal ion binding [GO:0046872]; voltage-gated calcium channel activity [GO:0005245]; voltage-gated calcium channel activity involved in AV node cell action potential [GO:0086056]; voltage-gated calcium channel activity involved in cardiac muscle cell action potential [GO:…	anchoring junction [GO:0070161]; cytoplasm [GO:0005737]; dendrite [GO:0030425]; integral component of membrane [GO:0016021]; integral component of plasma membrane [GO:0005887]; L-type voltage-gated calcium channel complex [GO:1990454]; perikaryon [GO:0043204]; plasma membrane [GO:0005886]; postsynaptic density [GO:0014069]; postsynaptic density membrane [GO:0098839]; voltage-gated calcium channel…	GO:0002520; GO:0005245; GO:0005516; GO:0005737; GO:0005886; GO:0005887; GO:0005891; GO:0007204; GO:0007507; GO:0008331; GO:0010881; GO:0014069; GO:0016021; GO:0030018; GO:0030425; GO:0035115; GO:0035585; GO:0043010; GO:0043204; GO:0045762; GO:0046872; GO:0051393; GO:0060402; GO:0061337; GO:0061577; GO:0070161; GO:0070588; GO:0086002; GO:0086007; GO:0086012; GO:0086045; GO:0086056; GO:0086064; GO:…	Q13936	0.731458	S1784	TFTTQRPLHINKAGSSQGDTESPSHEKLVDS	12.9186	12.8936	12.8508	14.0233	13.3441	14.5716	14.9333	15.2085	14.2294	15.0102
ANK1_P16157_S1686	0.920868	0.327312	1.27495	1.23029	0.452511	-1.23245	-1.05958	-1.2777	-0.653083	0.0168785	ANK1	Ankyrin-1	P16157	0.00538472	1.55835	sp|P16157|ANK1_HUMAN Ankyrin-1 OS=Homo sapiens OX=9606 GN=ANK1 PE=1 SV=3	FUNCTION: Attaches integral membrane proteins to cytoskeletal elements; binds to the erythrocyte membrane protein band 4.2, to Na-K ATPase, to the lymphocyte membrane protein GP85, and to the cytoskeletal proteins fodrin, tubulin, vimentin and desmin. Erythrocyte ankyrins also link spectrin (beta chain) to the cytoplasmic domain of the erythrocytes anion exchange protein; they retain most or all …	SUBCELLULAR LOCATION: [Isoform Er1]: Cytoplasm, cytoskeleton. Note=Probably the other erythrocyte (Er) isoforms, are located near the surface of erythrocytic plasma membrane.; SUBCELLULAR LOCATION: [Isoform Mu17]: Membrane. Cytoplasm, myofibril, sarcomere, M line. Note=Colocalizes with OBSCN isoform 3/obscurin at the M line in differentiated skeletal muscle cells.; SUBCELLULAR LOCATION: [Isoform …	DISEASE: Spherocytosis 1 (SPH1) [MIM:182900]: A form of spherocytosis, a hematologic disorder leading to chronic hemolytic anemia and characterized by numerous abnormally shaped erythrocytes which are generally spheroidal. SPH1 is characterized by severe hemolytic anemia. Inheritance can be autosomal dominant or autosomal recessive. Patients with homozygous mutations have a more severe disorder. …	cytoskeleton organization [GO:0007010]; endoplasmic reticulum to Golgi vesicle-mediated transport [GO:0006888]; exocytosis [GO:0006887]; maintenance of epithelial cell apical/basal polarity [GO:0045199]; protein localization to plasma membrane [GO:0072659]; signal transduction [GO:0007165]	ATPase binding [GO:0051117]; cytoskeletal anchor activity [GO:0008093]; enzyme binding [GO:0019899]; protein phosphatase binding [GO:0019903]; spectrin binding [GO:0030507]; structural constituent of cytoskeleton [GO:0005200]; structural molecule activity [GO:0005198]; transmembrane transporter binding [GO:0044325]	basolateral plasma membrane [GO:0016323]; cytoplasmic side of plasma membrane [GO:0009898]; cytoskeleton [GO:0005856]; cytosol [GO:0005829]; M band [GO:0031430]; neuron projection [GO:0043005]; plasma membrane [GO:0005886]; sarcoplasmic reticulum [GO:0016529]; spectrin-associated cytoskeleton [GO:0014731]	GO:0005198; GO:0005200; GO:0005829; GO:0005856; GO:0005886; GO:0006887; GO:0006888; GO:0007010; GO:0007165; GO:0008093; GO:0009898; GO:0014731; GO:0016323; GO:0016529; GO:0019899; GO:0019903; GO:0030507; GO:0031430; GO:0043005; GO:0044325; GO:0045199; GO:0051117; GO:0072659	P16157	0.999976	S1686	SLVSGHQRGQARITHSPTVSQVTERSQDRLQ	14.2281	13.6783	14.5561	14.5147	13.7943	12.2335	12.3936	12.1916	12.7702	13.3908
PDE5A_O76074_S86	0.451742	1.93209	1.00105	0.293448	0.473964	-0.830743	-0.908213	-1.04224	-0.362357	-1.00874	PDE5A	cGMP-specific 3',5'-cyclic phosphodiesterase	O76074	0.00874276	1.23679	sp|O76074|PDE5A_HUMAN cGMP-specific 3',5'-cyclic phosphodiesterase OS=Homo sapiens OX=9606 GN=PDE5A PE=1 SV=2	FUNCTION: Plays a role in signal transduction by regulating the intracellular concentration of cyclic nucleotides. This phosphodiesterase catalyzes the specific hydrolysis of cGMP to 5'-GMP (PubMed:9714779, PubMed:15489334). Specifically regulates nitric-oxide-generated cGMP (PubMed:15489334). {ECO:0000269|PubMed:15489334, ECO:0000269|PubMed:9714779}.			cGMP catabolic process [GO:0046069]; negative regulation of cardiac muscle contraction [GO:0055118]; negative regulation of T cell proliferation [GO:0042130]; oocyte development [GO:0048599]; positive regulation of cardiac muscle hypertrophy [GO:0010613]; positive regulation of MAP kinase activity [GO:0043406]; positive regulation of oocyte development [GO:0060282]; regulation of nitric oxide med…	3',5'-cyclic-GMP phosphodiesterase activity [GO:0047555]; 3',5'-cyclic-nucleotide phosphodiesterase activity [GO:0004114]; cGMP binding [GO:0030553]; metal ion binding [GO:0046872]	cytosol [GO:0005829]	GO:0004114; GO:0005829; GO:0007165; GO:0010613; GO:0010749; GO:0030553; GO:0042098; GO:0042130; GO:0043406; GO:0046069; GO:0046872; GO:0047555; GO:0048599; GO:0055118; GO:0055119; GO:0060282	O76074	0.996911	S86	GIRGHTESCSCPLQQSPRADNSAPGTPTRKI	12.7474	13.8497	13.1564	12.6295	12.7639	11.7924	11.7347	11.6349	12.1412	11.6598
MYL2_P10916_S15	-1.4	-1.57896	-0.590873	0.00504722	-0.502202	0.910758	1.21855	0.158369	0.782032	0.997275	MYL2	Myosin regulatory light chain 2, ventricular/cardiac muscle isoform	P10916	0.00896506	-1.91725	sp|P10916|MLRV_HUMAN Myosin regulatory light chain 2, ventricular/cardiac muscle isoform OS=Homo sapiens OX=9606 GN=MYL2 PE=1 SV=3	FUNCTION: Contractile protein that plays a role in heart development and function (PubMed:23365102, PubMed:32453731). Following phosphorylation, plays a role in cross-bridge cycling kinetics and cardiac muscle contraction by increasing myosin lever arm stiffness and promoting myosin head diffusion; as a consequence of the increase in maximum contraction force and calcium sensitivity of contractio…	SUBCELLULAR LOCATION: Cytoplasm, myofibril, sarcomere, A band {ECO:0000250|UniProtKB:P08733}.	DISEASE: Cardiomyopathy, familial hypertrophic 10 (CMH10) [MIM:608758]: A hereditary heart disorder characterized by ventricular hypertrophy, which is usually asymmetric and often involves the interventricular septum. The symptoms include dyspnea, syncope, collapse, palpitations, and chest pain. They can be readily provoked by exercise. The disorder has inter- and intrafamilial variability rangin…	cardiac muscle contraction [GO:0060048]; cardiac myofibril assembly [GO:0055003]; heart contraction [GO:0060047]; heart development [GO:0007507]; muscle cell fate specification [GO:0042694]; negative regulation of cell growth [GO:0030308]; positive regulation of the force of heart contraction [GO:0098735]; regulation of striated muscle contraction [GO:0006942]; regulation of the force of heart co…	actin monomer binding [GO:0003785]; calcium ion binding [GO:0005509]; myosin heavy chain binding [GO:0032036]; structural constituent of muscle [GO:0008307]	A band [GO:0031672]; cardiac myofibril [GO:0097512]; cytoplasm [GO:0005737]; cytoskeleton [GO:0005856]; cytosol [GO:0005829]; myofibril [GO:0030016]; myosin complex [GO:0016459]; sarcomere [GO:0030017]	GO:0002026; GO:0003785; GO:0005509; GO:0005737; GO:0005829; GO:0005856; GO:0006942; GO:0007507; GO:0008307; GO:0016459; GO:0030016; GO:0030017; GO:0030308; GO:0031672; GO:0032036; GO:0042694; GO:0055003; GO:0055010; GO:0060047; GO:0060048; GO:0097512; GO:0098735	P10916	0.99996	S15	_MAPKKAKKRAGGANSNVFSMFEQTQIQEFK	16.0491	15.8382	17.0027	17.705	17.1072	18.7725	19.1352	17.8857	18.6207	18.8744
AKAP13_Q12802_S2720	-1.45149	-0.839879	-1.15469	-0.451406	-0.289545	1.20711	1.09215	0.659897	0.0107215	1.21713	AKAP13	A-kinase anchor protein 13	Q12802	0.0101377	-1.00846	sp|Q12802|AKP13_HUMAN A-kinase anchor protein 13 OS=Homo sapiens OX=9606 GN=AKAP13 PE=1 SV=2	FUNCTION: Scaffold protein that plays an important role in assembling signaling complexes downstream of several types of G protein-coupled receptors. Activates RHOA in response to signaling via G protein-coupled receptors via its function as Rho guanine nucleotide exchange factor (PubMed:11546812, PubMed:15229649, PubMed:23090968, PubMed:25186459, PubMed:24993829). May also activate other Rho fam…	SUBCELLULAR LOCATION: Cytoplasm, cytosol {ECO:0000269|PubMed:11546812, ECO:0000269|PubMed:9891067}. Cytoplasm {ECO:0000269|PubMed:9627117}. Cytoplasm, cell cortex {ECO:0000269|PubMed:11546812}. Nucleus {ECO:0000269|PubMed:9627117}. Membrane {ECO:0000269|PubMed:11696353, ECO:0000269|PubMed:9891067}; Peripheral membrane protein {ECO:0000269|PubMed:11696353, ECO:0000305|PubMed:9891067}. Note=Colocal…		adenylate cyclase-activating adrenergic receptor signaling pathway involved in heart process [GO:0086023]; adrenergic receptor signaling pathway [GO:0071875]; bone development [GO:0060348]; cardiac muscle cell differentiation [GO:0055007]; cell growth involved in cardiac muscle cell development [GO:0061049]; G protein-coupled receptor signaling pathway [GO:0007186]; heart development [GO:0007507]…	cAMP-dependent protein kinase activity [GO:0004691]; guanyl-nucleotide exchange factor activity [GO:0005085]; MAP-kinase scaffold activity [GO:0005078]; metal ion binding [GO:0046872]; molecular adaptor activity [GO:0060090]; protein kinase A binding [GO:0051018]; small GTPase binding [GO:0031267]	cell cortex [GO:0005938]; cytosol [GO:0005829]; membrane [GO:0016020]; nucleus [GO:0005634]; perinuclear region of cytoplasm [GO:0048471]	GO:0004691; GO:0005078; GO:0005085; GO:0005634; GO:0005829; GO:0005938; GO:0007186; GO:0007507; GO:0016020; GO:0031267; GO:0035023; GO:0035025; GO:0043123; GO:0043406; GO:0046872; GO:0048471; GO:0051018; GO:0051056; GO:0051168; GO:0055007; GO:0060090; GO:0060297; GO:0060348; GO:0061049; GO:0071875; GO:0086023	Q12802	0.84257	S2720	EEPPSPSAPSIAKSGSLDSELSVSPKRNSIS	11.2949	11.6632	11.4736	11.8971	11.9945	12.8957	12.8265	12.5662	12.1753	12.9018
PDLIM5_Q96HC4_S332	1.74703	0.283773	0.95581	0.496003	0.883903	-0.924252	-0.944557	-0.696805	-0.709516	-1.09138	PDLIM5	PDZ and LIM domain protein 5	Q96HC4	0.0120644	0.712122	sp|Q96HC4|PDLI5_HUMAN PDZ and LIM domain protein 5 OS=Homo sapiens OX=9606 GN=PDLIM5 PE=1 SV=5	FUNCTION: May play an important role in the heart development by scaffolding PKC to the Z-disk region. May play a role in the regulation of cardiomyocyte expansion. Isoforms lacking the LIM domains may negatively modulate the scaffolding activity of isoform 1. Overexpression promotes the development of heart hypertrophy. Contributes to the regulation of dendritic spine morphogenesis in neurons. M…	SUBCELLULAR LOCATION: Postsynaptic density {ECO:0000250|UniProtKB:Q62920}. Presynapse {ECO:0000250|UniProtKB:Q62920}. Postsynapse {ECO:0000250|UniProtKB:Q62920}. Cytoplasm, cytosol {ECO:0000250|UniProtKB:Q62920}. Note=Detected both at presynaptic and postsynaptic sites, exclusively at excitatory synapses, but not inhibitory synapses, in hippocampal neurons. {ECO:0000250|UniProtKB:Q62920}.		actin cytoskeleton organization [GO:0030036]; cell growth involved in cardiac muscle cell development [GO:0061049]; heart development [GO:0007507]; muscle structure development [GO:0061061]; regulation of dendritic spine morphogenesis [GO:0061001]; regulation of synapse assembly [GO:0051963]	actin binding [GO:0003779]; actinin binding [GO:0042805]; cadherin binding involved in cell-cell adhesion [GO:0098641]; metal ion binding [GO:0046872]; muscle alpha-actinin binding [GO:0051371]; protein kinase C binding [GO:0005080]	actin cytoskeleton [GO:0015629]; adherens junction [GO:0005912]; cell projection [GO:0042995]; cytosol [GO:0005829]; filamentous actin [GO:0031941]; membrane [GO:0016020]; postsynaptic density [GO:0014069]; presynapse [GO:0098793]; stress fiber [GO:0001725]; Z disc [GO:0030018]	GO:0001725; GO:0003779; GO:0005080; GO:0005829; GO:0005912; GO:0007507; GO:0014069; GO:0015629; GO:0016020; GO:0030018; GO:0030036; GO:0031941; GO:0042805; GO:0042995; GO:0046872; GO:0051371; GO:0051963; GO:0061001; GO:0061049; GO:0061061; GO:0098641; GO:0098793	Q96HC4	0.976126	S332	ASSVASTRSMPESLDSPTSGRPGVTSLTAAA	12.9341	12.3375	12.6115	12.424	12.5822	11.8449	11.8367	11.9377	11.9325	11.7768
AKAP13_Q12802_T2411	-0.0646266	-0.745708	-1.5117	-0.664263	-1.2118	0.940246	0.436878	1.48042	0.470687	0.869867	AKAP13	A-kinase anchor protein 13	Q12802	0.0133714	-0.838245	sp|Q12802|AKP13_HUMAN A-kinase anchor protein 13 OS=Homo sapiens OX=9606 GN=AKAP13 PE=1 SV=2	FUNCTION: Scaffold protein that plays an important role in assembling signaling complexes downstream of several types of G protein-coupled receptors. Activates RHOA in response to signaling via G protein-coupled receptors via its function as Rho guanine nucleotide exchange factor (PubMed:11546812, PubMed:15229649, PubMed:23090968, PubMed:25186459, PubMed:24993829). May also activate other Rho fam…	SUBCELLULAR LOCATION: Cytoplasm, cytosol {ECO:0000269|PubMed:11546812, ECO:0000269|PubMed:9891067}. Cytoplasm {ECO:0000269|PubMed:9627117}. Cytoplasm, cell cortex {ECO:0000269|PubMed:11546812}. Nucleus {ECO:0000269|PubMed:9627117}. Membrane {ECO:0000269|PubMed:11696353, ECO:0000269|PubMed:9891067}; Peripheral membrane protein {ECO:0000269|PubMed:11696353, ECO:0000305|PubMed:9891067}. Note=Colocal…		adenylate cyclase-activating adrenergic receptor signaling pathway involved in heart process [GO:0086023]; adrenergic receptor signaling pathway [GO:0071875]; bone development [GO:0060348]; cardiac muscle cell differentiation [GO:0055007]; cell growth involved in cardiac muscle cell development [GO:0061049]; G protein-coupled receptor signaling pathway [GO:0007186]; heart development [GO:0007507]…	cAMP-dependent protein kinase activity [GO:0004691]; guanyl-nucleotide exchange factor activity [GO:0005085]; MAP-kinase scaffold activity [GO:0005078]; metal ion binding [GO:0046872]; molecular adaptor activity [GO:0060090]; protein kinase A binding [GO:0051018]; small GTPase binding [GO:0031267]	cell cortex [GO:0005938]; cytosol [GO:0005829]; membrane [GO:0016020]; nucleus [GO:0005634]; perinuclear region of cytoplasm [GO:0048471]	GO:0004691; GO:0005078; GO:0005085; GO:0005634; GO:0005829; GO:0005938; GO:0007186; GO:0007507; GO:0016020; GO:0031267; GO:0035023; GO:0035025; GO:0043123; GO:0043406; GO:0046872; GO:0048471; GO:0051018; GO:0051056; GO:0051168; GO:0055007; GO:0060090; GO:0060297; GO:0060348; GO:0061049; GO:0071875; GO:0086023	Q12802	0.941964	T2411	DCSPTHSPRVLFRSNTEEALKGGPLMKSAIN	13.0015	12.6615	12.2791	12.7022	12.4288	13.5031	13.2518	13.7728	13.2687	13.468
MPRIP_Q6WCQ1_S224	0.990657	1.56962	0.673832	0.0544676	0.745322	-1.45971	-1.23324	-0.350089	-0.123095	-0.86776	MPRIP	Myosin phosphatase Rho-interacting protein	Q6WCQ1	0.0153461	1.07769	sp|Q6WCQ1|MPRIP_HUMAN Myosin phosphatase Rho-interacting protein OS=Homo sapiens OX=9606 GN=MPRIP PE=1 SV=3	FUNCTION: Targets myosin phosphatase to the actin cytoskeleton. Required for the regulation of the actin cytoskeleton by RhoA and ROCK1. Depletion leads to an increased number of stress fibers in smooth muscle cells through stabilization of actin fibers by phosphorylated myosin. Overexpression of MRIP as well as its F-actin-binding region leads to disassembly of stress fibers in neuronal cells. {…	SUBCELLULAR LOCATION: Cytoplasm, cytoskeleton {ECO:0000269|PubMed:14506264, ECO:0000269|PubMed:16257966}. Note=Colocalizes with F-actin.		actin filament organization [GO:0007015]	actin filament binding [GO:0051015]; cadherin binding [GO:0045296]	actin cytoskeleton [GO:0015629]; cytosol [GO:0005829]; focal adhesion [GO:0005925]	GO:0005829; GO:0005925; GO:0007015; GO:0015629; GO:0045296; GO:0051015	Q6WCQ1	0.984011	S224	RTKDQPDGSSLSPAQSPSQSQPPAASSLREP	11.6836	12.0703	11.472	11.0583	11.5197	10.047	10.1983	10.7881	10.9397	10.4424
STRN3_Q13033_S229	0.875718	0.489473	1.70341	0.0472959	1.10627	-0.792555	-0.829575	-1.0292	-0.427292	-1.14354	STRN3	Striatin-3	Q13033	0.0154481	0.748825	sp|Q13033|STRN3_HUMAN Striatin-3 OS=Homo sapiens OX=9606 GN=STRN3 PE=1 SV=3	FUNCTION: Binds calmodulin in a calcium dependent manner. May function as scaffolding or signaling protein.	SUBCELLULAR LOCATION: Cytoplasm {ECO:0000250}. Membrane {ECO:0000250}; Peripheral membrane protein {ECO:0000250}.		negative regulation of intracellular estrogen receptor signaling pathway [GO:0033147]; negative regulation of transcription by RNA polymerase II [GO:0000122]; negative regulation of transcription, DNA-templated [GO:0045892]; positive regulation of transcription by RNA polymerase II [GO:0045944]; response to estradiol [GO:0032355]	armadillo repeat domain binding [GO:0070016]; calmodulin binding [GO:0005516]; protein phosphatase 2A binding [GO:0051721]; protein-containing complex binding [GO:0044877]; small GTPase binding [GO:0031267]	cytoplasm [GO:0005737]; dendrite [GO:0030425]; FAR/SIN/STRIPAK complex [GO:0090443]; Golgi apparatus [GO:0005794]; neuronal cell body [GO:0043025]; nucleoplasm [GO:0005654]; nucleus [GO:0005634]; plasma membrane [GO:0005886]; protein-containing complex [GO:0032991]	GO:0000122; GO:0005516; GO:0005634; GO:0005654; GO:0005737; GO:0005794; GO:0005886; GO:0030425; GO:0031267; GO:0032355; GO:0032991; GO:0033147; GO:0043025; GO:0044877; GO:0045892; GO:0045944; GO:0051721; GO:0070016; GO:0090443	Q13033	1	S229	SVETKNLEQILNGGESPKQKGQEIKRSSGDV	13.4216	13.2504	13.7886	13.0543	13.5239	12.6819	12.6655	12.577	12.8439	12.5263
AKAP12_Q02952_S286	0.480973	1.60706	0.000600073	0.531792	1.32275	-0.49663	-1.44933	-1.04165	-0.841614	-0.113944	AKAP12	A-kinase anchor protein 12	Q02952	0.0154688	1.54462	sp|Q02952|AKA12_HUMAN A-kinase anchor protein 12 OS=Homo sapiens OX=9606 GN=AKAP12 PE=1 SV=4	FUNCTION: Anchoring protein that mediates the subcellular compartmentation of protein kinase A (PKA) and protein kinase C (PKC).	SUBCELLULAR LOCATION: Cytoplasm, cell cortex {ECO:0000305}. Cytoplasm, cytoskeleton {ECO:0000305}. Membrane {ECO:0000305}; Lipid-anchor {ECO:0000305}. Note=May be part of the cortical cytoskeleton.		adenylate cyclase-inhibiting G protein-coupled receptor signaling pathway [GO:0007193]; cellular response to interleukin-1 [GO:0071347]; cellular response to tumor necrosis factor [GO:0071356]; G protein-coupled receptor signaling pathway [GO:0007186]; hepatic stellate cell activation [GO:0035733]; modulation of chemical synaptic transmission [GO:0050804]; negative regulation of vascular permeabi…	adenylate cyclase binding [GO:0008179]; calmodulin binding [GO:0005516]; protein kinase A binding [GO:0051018]	cell cortex [GO:0005938]; cytoplasm [GO:0005737]; cytoskeleton [GO:0005856]; cytosol [GO:0005829]; focal adhesion [GO:0005925]; neuronal cell body [GO:0043025]; plasma membrane [GO:0005886]; Schaffer collateral - CA1 synapse [GO:0098685]	GO:0005516; GO:0005737; GO:0005829; GO:0005856; GO:0005886; GO:0005925; GO:0005938; GO:0007165; GO:0007186; GO:0007193; GO:0008179; GO:0010738; GO:0010739; GO:0032496; GO:0032760; GO:0035733; GO:0043025; GO:0043116; GO:0050804; GO:0051018; GO:0051602; GO:0051770; GO:0061870; GO:0070374; GO:0071347; GO:0071356; GO:0090036; GO:0098685; GO:1900143	Q02952	0.998015	S286	EKQEKEPSKSAESPTSPVTSETGSTFKKFFT	15.9691	17.0719	15.4987	16.0189	16.7935	15.0117	14.0788	14.478	14.6739	15.3865
TTN_Q8WZ42_S33624	0.838571	0.941008	1.2537	0.213607	0.978791	-0.748315	-0.705671	-1.25166	-0.0333677	-1.48666	TTN	Titin	Q8WZ42	0.0163593	0.727397	sp|Q8WZ42|TITIN_HUMAN Titin OS=Homo sapiens OX=9606 GN=TTN PE=1 SV=4	FUNCTION: Key component in the assembly and functioning of vertebrate striated muscles. By providing connections at the level of individual microfilaments, it contributes to the fine balance of forces between the two halves of the sarcomere. The size and extensibility of the cross-links are the main determinants of sarcomere extensibility properties of muscle. In non-muscle cells, seems to play a…	SUBCELLULAR LOCATION: Cytoplasm {ECO:0000305|PubMed:16410549}. Nucleus {ECO:0000269|PubMed:16410549}.	DISEASE: Myopathy, myofibrillar, 9, with early respiratory failure (MFM9) [MIM:603689]: An autosomal dominant myopathy characterized by adulthood onset of weakness in proximal, distal, axial and respiratory muscles. Pelvic girdle weakness, foot drop and neck weakness are the main symptoms at onset, but ultimately the weakness usually involves the proximal compartment of both upper and lower limbs…	cardiac muscle cell development [GO:0055013]; cardiac muscle contraction [GO:0060048]; cardiac muscle hypertrophy [GO:0003300]; cardiac muscle tissue morphogenesis [GO:0055008]; cardiac myofibril assembly [GO:0055003]; detection of muscle stretch [GO:0035995]; mitotic chromosome condensation [GO:0007076]; muscle contraction [GO:0006936]; positive regulation of gene expression [GO:0010628]; positi…	actin filament binding [GO:0051015]; actinin binding [GO:0042805]; ATP binding [GO:0005524]; calcium ion binding [GO:0005509]; calmodulin binding [GO:0005516]; enzyme binding [GO:0019899]; identical protein binding [GO:0042802]; muscle alpha-actinin binding [GO:0051371]; protease binding [GO:0002020]; protein kinase binding [GO:0019901]; protein self-association [GO:0043621]; protein serine kinas…	condensed nuclear chromosome [GO:0000794]; cytosol [GO:0005829]; extracellular exosome [GO:0070062]; extracellular region [GO:0005576]; I band [GO:0031674]; M band [GO:0031430]; striated muscle thin filament [GO:0005865]; titin-telethonin complex [GO:1990733]; Z disc [GO:0030018]	GO:0000794; GO:0002020; GO:0003300; GO:0004674; GO:0004713; GO:0005509; GO:0005516; GO:0005524; GO:0005576; GO:0005829; GO:0005865; GO:0006936; GO:0006941; GO:0007076; GO:0008307; GO:0010628; GO:0010737; GO:0019899; GO:0019901; GO:0030018; GO:0030240; GO:0030241; GO:0031430; GO:0031433; GO:0031674; GO:0035995; GO:0042802; GO:0042805; GO:0043621; GO:0045214; GO:0045859; GO:0048769; GO:0050714; GO:…	Q8WZ42	0.906607	S33624	PKRVKSPEPSHPKAVSPTETKPTPTEKVQHL	18.3031	18.3472	18.4818	18.0342	18.3635	17.6202	17.6386	17.4036	17.9279	17.3025
MYL2_P10916_T24	-1.32645	-1.62549	-0.570901	0.13926	-0.502727	0.770664	1.23564	-0.0559258	0.932561	1.00336	MYL2	Myosin regulatory light chain 2, ventricular/cardiac muscle isoform	P10916	0.0164209	-2.25145	sp|P10916|MLRV_HUMAN Myosin regulatory light chain 2, ventricular/cardiac muscle isoform OS=Homo sapiens OX=9606 GN=MYL2 PE=1 SV=3	FUNCTION: Contractile protein that plays a role in heart development and function (PubMed:23365102, PubMed:32453731). Following phosphorylation, plays a role in cross-bridge cycling kinetics and cardiac muscle contraction by increasing myosin lever arm stiffness and promoting myosin head diffusion; as a consequence of the increase in maximum contraction force and calcium sensitivity of contractio…	SUBCELLULAR LOCATION: Cytoplasm, myofibril, sarcomere, A band {ECO:0000250|UniProtKB:P08733}.	DISEASE: Cardiomyopathy, familial hypertrophic 10 (CMH10) [MIM:608758]: A hereditary heart disorder characterized by ventricular hypertrophy, which is usually asymmetric and often involves the interventricular septum. The symptoms include dyspnea, syncope, collapse, palpitations, and chest pain. They can be readily provoked by exercise. The disorder has inter- and intrafamilial variability rangin…	cardiac muscle contraction [GO:0060048]; cardiac myofibril assembly [GO:0055003]; heart contraction [GO:0060047]; heart development [GO:0007507]; muscle cell fate specification [GO:0042694]; negative regulation of cell growth [GO:0030308]; positive regulation of the force of heart contraction [GO:0098735]; regulation of striated muscle contraction [GO:0006942]; regulation of the force of heart co…	actin monomer binding [GO:0003785]; calcium ion binding [GO:0005509]; myosin heavy chain binding [GO:0032036]; structural constituent of muscle [GO:0008307]	A band [GO:0031672]; cardiac myofibril [GO:0097512]; cytoplasm [GO:0005737]; cytoskeleton [GO:0005856]; cytosol [GO:0005829]; myofibril [GO:0030016]; myosin complex [GO:0016459]; sarcomere [GO:0030017]	GO:0002026; GO:0003785; GO:0005509; GO:0005737; GO:0005829; GO:0005856; GO:0006942; GO:0007507; GO:0008307; GO:0016459; GO:0030016; GO:0030017; GO:0030308; GO:0031672; GO:0032036; GO:0042694; GO:0055003; GO:0055010; GO:0060047; GO:0060048; GO:0097512; GO:0098735	P10916	0.794002	T24	RAGGANSNVFSMFEQTQIQEFKEAFTIMDQN	12.2388	11.8057	13.3331	14.3616	13.4318	15.2761	15.9495	14.0789	15.5106	15.6131
KCNIP2_Q9NS61_S9	-1.62398	-0.54145	-0.552342	0.155668	-1.32211	0.266034	0.332318	0.750373	1.39736	1.13813	KCNIP2	Kv channel-interacting protein 2	Q9NS61	0.0173511	-1.88888	sp|Q9NS61|KCIP2_HUMAN Kv channel-interacting protein 2 OS=Homo sapiens OX=9606 GN=KCNIP2 PE=1 SV=3	FUNCTION: Regulatory subunit of Kv4/D (Shal)-type voltage-gated rapidly inactivating A-type potassium channels. Modulates channel density, inactivation kinetics and rate of recovery from inactivation in a calcium-dependent and isoform-specific manner. In vitro, modulates KCND2/Kv4.2 and KCND3/Kv4.3 currents. Involved in KCND2 and KCND3 trafficking to the cell surface. May be required for the expr…	SUBCELLULAR LOCATION: [Isoform 1]: Cell membrane {ECO:0000250|UniProtKB:Q9JM59}; Lipid-anchor {ECO:0000250|UniProtKB:Q9JM59}. Note=Detected on lipid rafts (By similarity). {ECO:0000250|UniProtKB:Q9JM59}.; SUBCELLULAR LOCATION: [Isoform 2]: Cell membrane {ECO:0000250|UniProtKB:Q9JM59}; Lipid-anchor {ECO:0000250|UniProtKB:Q9JM59}.; SUBCELLULAR LOCATION: [Isoform 6]: Cell membrane {ECO:0000250|UniPr…		chemical synaptic transmission [GO:0007268]; clustering of voltage-gated potassium channels [GO:0045163]; detection of calcium ion [GO:0005513]; membrane repolarization [GO:0086009]; membrane repolarization during cardiac muscle cell action potential [GO:0086013]; muscle contraction [GO:0006936]; positive regulation of potassium ion export across plasma membrane [GO:1903766]; positive regulation …	calcium ion binding [GO:0005509]; ER retention sequence binding [GO:0046923]; identical protein binding [GO:0042802]; potassium channel activity [GO:0005267]; potassium channel regulator activity [GO:0015459]; protein N-terminus binding [GO:0047485]; protein-containing complex binding [GO:0044877]; transmembrane transporter binding [GO:0044325]; voltage-gated ion channel activity [GO:0005244]	cytoplasm [GO:0005737]; dendrite [GO:0030425]; plasma membrane [GO:0005886]; potassium channel complex [GO:0034705]; synapse [GO:0045202]; voltage-gated potassium channel complex [GO:0008076]	GO:0005244; GO:0005267; GO:0005509; GO:0005513; GO:0005737; GO:0005886; GO:0006813; GO:0006936; GO:0007165; GO:0007268; GO:0008016; GO:0008076; GO:0015459; GO:0030425; GO:0034705; GO:0042802; GO:0044325; GO:0044877; GO:0045163; GO:0045202; GO:0046923; GO:0047485; GO:0086009; GO:0086013; GO:0097623; GO:1901379; GO:1903766; GO:1903818	Q9NS61	0.963334	S9	_______MRGQGRKESLSDSRDLDGSYDQLT	12.7851	14.1012	14.0879	14.9487	13.1521	15.0829	15.1634	15.6717	16.4583	16.1431
MYH7_P12883_S1366.1	-1.19095	-1.21008	-0.68348	-0.379963	-0.498206	0.232222	-0.150766	1.0226	1.5864	1.27223	MYH7	Myosin-7;Myosin-6	P12883	0.0195101	-1.02998	sp|P12883|MYH7_HUMAN Myosin-7 OS=Homo sapiens OX=9606 GN=MYH7 PE=1 SV=5;sp|P13533|MYH6_HUMAN Myosin-6 OS=Homo sapiens OX=9606 GN=MYH6 PE=1 SV=5	FUNCTION: Myosins are actin-based motor molecules with ATPase activity essential for muscle contraction. Forms regular bipolar thick filaments that, together with actin thin filaments, constitute the fundamental contractile unit of skeletal and cardiac muscle. {ECO:0000305|PubMed:26150528, ECO:0000305|PubMed:26246073}.	SUBCELLULAR LOCATION: Cytoplasm, myofibril {ECO:0000250|UniProtKB:P02564}. Cytoplasm, myofibril, sarcomere {ECO:0000250|UniProtKB:P02564}. Note=Thick filaments of the myofibrils. {ECO:0000250|UniProtKB:P02564}.	DISEASE: Cardiomyopathy, familial hypertrophic 1 (CMH1) [MIM:192600]: A hereditary heart disorder characterized by ventricular hypertrophy, which is usually asymmetric and often involves the interventricular septum. The symptoms include dyspnea, syncope, collapse, palpitations, and chest pain. They can be readily provoked by exercise. The disorder has inter- and intrafamilial variability ranging …	adult heart development [GO:0007512]; ATP metabolic process [GO:0046034]; cardiac muscle contraction [GO:0060048]; cardiac muscle hypertrophy in response to stress [GO:0014898]; muscle contraction [GO:0006936]; muscle filament sliding [GO:0030049]; regulation of heart rate [GO:0002027]; regulation of slow-twitch skeletal muscle fiber contraction [GO:0031449]; regulation of the force of heart cont…	actin filament binding [GO:0051015]; ATP binding [GO:0005524]; calmodulin binding [GO:0005516]; microfilament motor activity [GO:0000146]	muscle myosin complex [GO:0005859]; myofibril [GO:0030016]; myosin complex [GO:0016459]; myosin filament [GO:0032982]; myosin II complex [GO:0016460]; sarcomere [GO:0030017]; stress fiber [GO:0001725]; Z disc [GO:0030018]	GO:0000146; GO:0001725; GO:0002026; GO:0002027; GO:0003009; GO:0005516; GO:0005524; GO:0005859; GO:0006936; GO:0006941; GO:0007512; GO:0014728; GO:0014883; GO:0014898; GO:0016459; GO:0016460; GO:0030016; GO:0030017; GO:0030018; GO:0030049; GO:0031449; GO:0032982; GO:0045214; GO:0046034; GO:0051015; GO:0055010; GO:0060048	P12883;P13533	1	S1366	TEAKAELQRVLSKANSEVAQWRTKYETDAIQ	15.9586	15.9462	16.2884	16.4856	16.4088	16.8834	16.6345	17.397	17.7634	17.5592
MYH7_P12883_S1362.1	-1.19095	-1.21008	-0.68348	-0.379963	-0.498206	0.232222	-0.150766	1.0226	1.5864	1.27223	MYH7	Myosin-7;Myosin-6	P12883	0.0195101	-1.02998	sp|P12883|MYH7_HUMAN Myosin-7 OS=Homo sapiens OX=9606 GN=MYH7 PE=1 SV=5;sp|P13533|MYH6_HUMAN Myosin-6 OS=Homo sapiens OX=9606 GN=MYH6 PE=1 SV=5	FUNCTION: Myosins are actin-based motor molecules with ATPase activity essential for muscle contraction. Forms regular bipolar thick filaments that, together with actin thin filaments, constitute the fundamental contractile unit of skeletal and cardiac muscle. {ECO:0000305|PubMed:26150528, ECO:0000305|PubMed:26246073}.	SUBCELLULAR LOCATION: Cytoplasm, myofibril {ECO:0000250|UniProtKB:P02564}. Cytoplasm, myofibril, sarcomere {ECO:0000250|UniProtKB:P02564}. Note=Thick filaments of the myofibrils. {ECO:0000250|UniProtKB:P02564}.	DISEASE: Cardiomyopathy, familial hypertrophic 1 (CMH1) [MIM:192600]: A hereditary heart disorder characterized by ventricular hypertrophy, which is usually asymmetric and often involves the interventricular septum. The symptoms include dyspnea, syncope, collapse, palpitations, and chest pain. They can be readily provoked by exercise. The disorder has inter- and intrafamilial variability ranging …	adult heart development [GO:0007512]; ATP metabolic process [GO:0046034]; cardiac muscle contraction [GO:0060048]; cardiac muscle hypertrophy in response to stress [GO:0014898]; muscle contraction [GO:0006936]; muscle filament sliding [GO:0030049]; regulation of heart rate [GO:0002027]; regulation of slow-twitch skeletal muscle fiber contraction [GO:0031449]; regulation of the force of heart cont…	actin filament binding [GO:0051015]; ATP binding [GO:0005524]; calmodulin binding [GO:0005516]; microfilament motor activity [GO:0000146]	muscle myosin complex [GO:0005859]; myofibril [GO:0030016]; myosin complex [GO:0016459]; myosin filament [GO:0032982]; myosin II complex [GO:0016460]; sarcomere [GO:0030017]; stress fiber [GO:0001725]; Z disc [GO:0030018]	GO:0000146; GO:0001725; GO:0002026; GO:0002027; GO:0003009; GO:0005516; GO:0005524; GO:0005859; GO:0006936; GO:0006941; GO:0007512; GO:0014728; GO:0014883; GO:0014898; GO:0016459; GO:0016460; GO:0030016; GO:0030017; GO:0030018; GO:0030049; GO:0031449; GO:0032982; GO:0045214; GO:0046034; GO:0051015; GO:0055010; GO:0060048	P12883;P13533	1	S1362	YEEETEAKAELQRVLSKANSEVAQWRTKYET	15.9586	15.9462	16.2884	16.4856	16.4088	16.8834	16.6345	17.397	17.7634	17.5592
PPP1R12C_Q9BZL4_S509	0.468803	0.629004	1.56321	0.030356	1.24202	-0.937983	-0.282322	-1.44577	-0.111818	-1.15549	PPP1R12C	Protein phosphatase 1 regulatory subunit 12C	Q9BZL4	0.0215031	1.03112	sp|Q9BZL4|PP12C_HUMAN Protein phosphatase 1 regulatory subunit 12C OS=Homo sapiens OX=9606 GN=PPP1R12C PE=1 SV=1	FUNCTION: Regulates myosin phosphatase activity. {ECO:0000269|PubMed:11399775}.	SUBCELLULAR LOCATION: Cytoplasm {ECO:0000269|PubMed:11399775, ECO:0000269|PubMed:12923170}. Cytoplasm, cytoskeleton, stress fiber {ECO:0000269|PubMed:11399775, ECO:0000269|PubMed:12923170}.		signal transduction [GO:0007165]	enzyme inhibitor activity [GO:0004857]; phosphatase regulator activity [GO:0019208]; protein kinase binding [GO:0019901]	cytoplasm [GO:0005737]; cytoskeleton [GO:0005856]	GO:0004857; GO:0005737; GO:0005856; GO:0007165; GO:0019208; GO:0019901	Q9BZL4	0.999997	S509	CLENSSPPSRIPEPESPAKPNVPTASTAPPA	14.1057	14.2107	14.8229	13.8184	14.6124	13.1838	13.6134	12.851	13.7252	13.0412
PPP1R12A_O14974_T443	-1.19431	-1.58279	-0.0820596	-0.69131	-0.470356	0.381801	1.55558	0.98983	0.215767	0.877847	PPP1R12A	Protein phosphatase 1 regulatory subunit 12A	O14974	0.022608	-0.813299	sp|O14974|MYPT1_HUMAN Protein phosphatase 1 regulatory subunit 12A OS=Homo sapiens OX=9606 GN=PPP1R12A PE=1 SV=1	FUNCTION: Key regulator of protein phosphatase 1C (PPP1C). Mediates binding to myosin. As part of the PPP1C complex, involved in dephosphorylation of PLK1. Capable of inhibiting HIF1AN-dependent suppression of HIF1A activity. {ECO:0000269|PubMed:18477460, ECO:0000269|PubMed:19245366, ECO:0000269|PubMed:20354225}.	SUBCELLULAR LOCATION: Cytoplasm {ECO:0000269|PubMed:12923170, ECO:0000269|PubMed:18477460}. Cytoplasm, cytoskeleton, stress fiber {ECO:0000269|PubMed:12923170}. Note=Also along actomyosin filaments. {ECO:0000269|PubMed:12923170}.	DISEASE: Genitourinary and/or brain malformation syndrome (GUBS) [MIM:618820]: An autosomal dominant syndrome characterized by multiple congenital anomalies including urogenital malformations and brain abnormalities ranging from agenesis of the corpus callosum to anencephaly. {ECO:0000269|PubMed:31883643}. Note=The disease is caused by variants affecting the gene represented in this entry.	cellular response to xenobiotic stimulus [GO:0071466]; centrosome cycle [GO:0007098]; mitotic cell cycle [GO:0000278]; negative regulation of catalytic activity [GO:0043086]; positive regulation of myosin-light-chain-phosphatase activity [GO:0035508]; positive regulation of transcription by RNA polymerase II [GO:0045944]; protein dephosphorylation [GO:0006470]; regulation of cell adhesion [GO:003…	14-3-3 protein binding [GO:0071889]; enzyme inhibitor activity [GO:0004857]; phosphatase regulator activity [GO:0019208]; protein kinase binding [GO:0019901]	A band [GO:0031672]; actin cytoskeleton [GO:0015629]; centrosome [GO:0005813]; contractile fiber [GO:0043292]; cytoplasm [GO:0005737]; cytosol [GO:0005829]; focal adhesion [GO:0005925]; kinetochore [GO:0000776]; nucleolus [GO:0005730]; nucleoplasm [GO:0005654]; plasma membrane [GO:0005886]; PTW/PP1 phosphatase complex [GO:0072357]; Z disc [GO:0030018]	GO:0000278; GO:0000776; GO:0004857; GO:0005654; GO:0005730; GO:0005737; GO:0005813; GO:0005829; GO:0005886; GO:0005925; GO:0006470; GO:0007098; GO:0007165; GO:0015629; GO:0019208; GO:0019901; GO:0030018; GO:0030155; GO:0031672; GO:0035507; GO:0035508; GO:0043086; GO:0043292; GO:0045944; GO:0046822; GO:0071466; GO:0071889; GO:0072357	O14974	0.725992	T443	RKDESPATWRLGLRKTGSYGALAEITASKEG	14.0678	13.8713	14.6302	14.3221	14.4338	14.8648	15.4583	15.1722	14.7808	15.1156
PPP1R12C_Q9BZL4_S453	-1.44496	-1.23748	0.146524	-0.589008	-0.759141	-0.021059	1.46794	0.585318	1.2602	0.591665	PPP1R12C	Protein phosphatase 1 regulatory subunit 12C	Q9BZL4	0.0239256	-1.06272	sp|Q9BZL4|PP12C_HUMAN Protein phosphatase 1 regulatory subunit 12C OS=Homo sapiens OX=9606 GN=PPP1R12C PE=1 SV=1	FUNCTION: Regulates myosin phosphatase activity. {ECO:0000269|PubMed:11399775}.	SUBCELLULAR LOCATION: Cytoplasm {ECO:0000269|PubMed:11399775, ECO:0000269|PubMed:12923170}. Cytoplasm, cytoskeleton, stress fiber {ECO:0000269|PubMed:11399775, ECO:0000269|PubMed:12923170}.		signal transduction [GO:0007165]	enzyme inhibitor activity [GO:0004857]; phosphatase regulator activity [GO:0019208]; protein kinase binding [GO:0019901]	cytoplasm [GO:0005737]; cytoskeleton [GO:0005856]	GO:0004857; GO:0005737; GO:0005856; GO:0007165; GO:0019208; GO:0019901	Q9BZL4	0.911957	S453	TAEGAPGAGLQRSASSSWLEGTSTQAKELRL	15.9642	16.1062	17.0529	16.5497	16.4334	16.9382	17.9567	17.353	17.8146	17.3573
PPP1R3A_Q16821_S649	1.17217	0.352177	0.890641	0.447656	1.43183	-0.568099	-1.03779	-0.238523	-1.21478	-1.23528	PPP1R3A	Protein phosphatase 1 regulatory subunit 3A	Q16821	0.0242115	0.581853	sp|Q16821|PPR3A_HUMAN Protein phosphatase 1 regulatory subunit 3A OS=Homo sapiens OX=9606 GN=PPP1R3A PE=1 SV=3	FUNCTION: Seems to act as a glycogen-targeting subunit for PP1. PP1 is essential for cell division, and participates in the regulation of glycogen metabolism, muscle contractility and protein synthesis. Plays an important role in glycogen synthesis but is not essential for insulin activation of glycogen synthase (By similarity). {ECO:0000250}.	SUBCELLULAR LOCATION: Membrane {ECO:0000250}; Single-pass membrane protein {ECO:0000250}.	DISEASE: Diabetes mellitus, non-insulin-dependent (NIDDM) [MIM:125853]: A multifactorial disorder of glucose homeostasis caused by a lack of sensitivity to the body's own insulin. Affected individuals usually have an obese body habitus and manifestations of a metabolic syndrome characterized by diabetes, insulin resistance, hypertension and hypertriglyceridemia. The disease results in long-term c…	glycogen metabolic process [GO:0005977]; regulation of glycogen biosynthetic process [GO:0005979]	glycogen binding [GO:2001069]; protein phosphatase 1 binding [GO:0008157]	integral component of membrane [GO:0016021]; protein phosphatase type 1 complex [GO:0000164]	GO:0000164; GO:0005977; GO:0005979; GO:0008157; GO:0016021; GO:2001069	Q16821	1	S649	VEEKSGGINSEDQDNSPQHKQSWNVLESQGK	14.1558	13.8781	14.0604	13.9104	14.2438	13.5663	13.4072	13.678	13.3473	13.3403
PPP1R12A_O14974_S445	-1.03694	-1.33656	-0.380632	-0.775449	-0.538856	-0.177146	1.58534	1.15215	0.53901	0.969079	PPP1R12A	Protein phosphatase 1 regulatory subunit 12A	O14974	0.0252577	-0.698385	sp|O14974|MYPT1_HUMAN Protein phosphatase 1 regulatory subunit 12A OS=Homo sapiens OX=9606 GN=PPP1R12A PE=1 SV=1	FUNCTION: Key regulator of protein phosphatase 1C (PPP1C). Mediates binding to myosin. As part of the PPP1C complex, involved in dephosphorylation of PLK1. Capable of inhibiting HIF1AN-dependent suppression of HIF1A activity. {ECO:0000269|PubMed:18477460, ECO:0000269|PubMed:19245366, ECO:0000269|PubMed:20354225}.	SUBCELLULAR LOCATION: Cytoplasm {ECO:0000269|PubMed:12923170, ECO:0000269|PubMed:18477460}. Cytoplasm, cytoskeleton, stress fiber {ECO:0000269|PubMed:12923170}. Note=Also along actomyosin filaments. {ECO:0000269|PubMed:12923170}.	DISEASE: Genitourinary and/or brain malformation syndrome (GUBS) [MIM:618820]: An autosomal dominant syndrome characterized by multiple congenital anomalies including urogenital malformations and brain abnormalities ranging from agenesis of the corpus callosum to anencephaly. {ECO:0000269|PubMed:31883643}. Note=The disease is caused by variants affecting the gene represented in this entry.	cellular response to xenobiotic stimulus [GO:0071466]; centrosome cycle [GO:0007098]; mitotic cell cycle [GO:0000278]; negative regulation of catalytic activity [GO:0043086]; positive regulation of myosin-light-chain-phosphatase activity [GO:0035508]; positive regulation of transcription by RNA polymerase II [GO:0045944]; protein dephosphorylation [GO:0006470]; regulation of cell adhesion [GO:003…	14-3-3 protein binding [GO:0071889]; enzyme inhibitor activity [GO:0004857]; phosphatase regulator activity [GO:0019208]; protein kinase binding [GO:0019901]	A band [GO:0031672]; actin cytoskeleton [GO:0015629]; centrosome [GO:0005813]; contractile fiber [GO:0043292]; cytoplasm [GO:0005737]; cytosol [GO:0005829]; focal adhesion [GO:0005925]; kinetochore [GO:0000776]; nucleolus [GO:0005730]; nucleoplasm [GO:0005654]; plasma membrane [GO:0005886]; PTW/PP1 phosphatase complex [GO:0072357]; Z disc [GO:0030018]	GO:0000278; GO:0000776; GO:0004857; GO:0005654; GO:0005730; GO:0005737; GO:0005813; GO:0005829; GO:0005886; GO:0005925; GO:0006470; GO:0007098; GO:0007165; GO:0015629; GO:0019208; GO:0019901; GO:0030018; GO:0030155; GO:0031672; GO:0035507; GO:0035508; GO:0043086; GO:0043292; GO:0045944; GO:0046822; GO:0071466; GO:0071889; GO:0072357	O14974	0.974278	S445	DESPATWRLGLRKTGSYGALAEITASKEGQK	13.7058	13.5773	13.9875	13.8181	13.9196	14.0748	14.8312	14.6453	14.3822	14.5667
MYBPC3_Q14896_T274	-1.10031	-1.65063	-0.726706	0.499979	-0.963914	0.933452	0.628668	0.606647	0.611207	1.16162	MYBPC3	Myosin-binding protein C, cardiac-type	Q14896	0.0255913	-0.835882	sp|Q14896|MYPC3_HUMAN Myosin-binding protein C, cardiac-type OS=Homo sapiens OX=9606 GN=MYBPC3 PE=1 SV=4	FUNCTION: Thick filament-associated protein located in the crossbridge region of vertebrate striated muscle a bands. In vitro it binds MHC, F-actin and native thin filaments, and modifies the activity of actin-activated myosin ATPase. It may modulate muscle contraction or may play a more structural role.		DISEASE: Cardiomyopathy, familial hypertrophic 4 (CMH4) [MIM:115197]: A hereditary heart disorder characterized by ventricular hypertrophy, which is usually asymmetric and often involves the interventricular septum. The symptoms include dyspnea, syncope, collapse, palpitations, and chest pain. They can be readily provoked by exercise. The disorder has inter- and intrafamilial variability ranging …	cardiac muscle contraction [GO:0060048]; cell adhesion [GO:0007155]; heart morphogenesis [GO:0003007]; positive regulation of ATP-dependent activity [GO:0032781]; regulation of muscle filament sliding [GO:0032971]; regulation of striated muscle contraction [GO:0006942]; ventricular cardiac muscle tissue morphogenesis [GO:0055010]	actin binding [GO:0003779]; ATPase activator activity [GO:0001671]; identical protein binding [GO:0042802]; metal ion binding [GO:0046872]; myosin binding [GO:0017022]; myosin heavy chain binding [GO:0032036]; structural constituent of muscle [GO:0008307]; titin binding [GO:0031432]	A band [GO:0031672]; C zone [GO:0014705]; cardiac myofibril [GO:0097512]; cytosol [GO:0005829]; sarcomere [GO:0030017]; striated muscle myosin thick filament [GO:0005863]	GO:0001671; GO:0003007; GO:0003779; GO:0005829; GO:0005863; GO:0006942; GO:0007155; GO:0008307; GO:0014705; GO:0017022; GO:0030017; GO:0031432; GO:0031672; GO:0032036; GO:0032781; GO:0032971; GO:0042802; GO:0046872; GO:0055010; GO:0060048; GO:0097512	Q14896	0.992254	T274	AMGTGDLDLLSAFRRTSLAGGGRRISDSHED	14.7818	14.4901	14.9799	15.6303	14.8542	15.8601	15.6985	15.6868	15.6892	15.981
PPP2R5D_Q14738_S573	-0.43764	-0.811456	-1.63904	-0.248758	-0.764215	1.54877	0.843584	-0.0483696	0.28224	1.27489	PPP2R5D	Serine/threonine-protein phosphatase 2A 56 kDa regulatory subunit delta isoform	Q14738	0.0271931	-0.844361	sp|Q14738|2A5D_HUMAN Serine/threonine-protein phosphatase 2A 56 kDa regulatory subunit delta isoform OS=Homo sapiens OX=9606 GN=PPP2R5D PE=1 SV=1	FUNCTION: The B regulatory subunit might modulate substrate selectivity and catalytic activity, and also might direct the localization of the catalytic enzyme to a particular subcellular compartment.	SUBCELLULAR LOCATION: Cytoplasm. Nucleus. Note=Nuclear in interphase, nuclear during mitosis.	DISEASE: Intellectual developmental disorder, autosomal dominant 35 (MRD35) [MIM:616355]: A disorder characterized by significantly below average general intellectual functioning associated with impairments in adaptive behavior and manifested during the developmental period. {ECO:0000269|PubMed:25533962, ECO:0000269|PubMed:26168268}. Note=The disease is caused by variants affecting the gene repre…	nervous system development [GO:0007399]; positive regulation of protein dephosphorylation [GO:0035307]; protein dephosphorylation [GO:0006470]; signal transduction [GO:0007165]	phosphoprotein phosphatase activity [GO:0004721]; protein phosphatase activator activity [GO:0072542]; protein phosphatase regulator activity [GO:0019888]	cytosol [GO:0005829]; nucleoplasm [GO:0005654]; nucleus [GO:0005634]; protein phosphatase type 2A complex [GO:0000159]	GO:0000159; GO:0004721; GO:0005634; GO:0005654; GO:0005829; GO:0006470; GO:0007165; GO:0007399; GO:0019888; GO:0035307; GO:0072542	Q14738	0.999999	S573	MLKDIKKEKVLLRRKSELPQDVYTIKALEAH	13.3777	13.1754	12.7276	13.4799	13.201	14.4525	14.0709	13.5883	13.7672	14.3043
CAMK2B_Q13554_S367	1.31531	1.10207	1.25877	-0.529857	0.63265	-0.715946	-0.179443	-1.31071	-0.405485	-1.16737	CAMK2B	Calcium/calmodulin-dependent protein kinase type II subunit beta	Q13554	0.0272798	1.20276	sp|Q13554|KCC2B_HUMAN Calcium/calmodulin-dependent protein kinase type II subunit beta OS=Homo sapiens OX=9606 GN=CAMK2B PE=1 SV=3	FUNCTION: Calcium/calmodulin-dependent protein kinase that functions autonomously after Ca(2+)/calmodulin-binding and autophosphorylation, and is involved in dendritic spine and synapse formation, neuronal plasticity and regulation of sarcoplasmic reticulum Ca(2+) transport in skeletal muscle. In neurons, plays an essential structural role in the reorganization of the actin cytoskeleton during pl…	SUBCELLULAR LOCATION: Cytoplasm, cytoskeleton {ECO:0000269|PubMed:21529938}. Cytoplasm, cytoskeleton, microtubule organizing center, centrosome {ECO:0000250}. Sarcoplasmic reticulum membrane {ECO:0000269|PubMed:21529938}; Peripheral membrane protein {ECO:0000269|PubMed:21529938}; Cytoplasmic side {ECO:0000269|PubMed:21529938}. Synapse {ECO:0000250|UniProtKB:P08413}. Note=In slow-twitch muscle, ev…	DISEASE: Intellectual developmental disorder, autosomal dominant 54 (MRD54) [MIM:617799]: A disorder characterized by significantly below average general intellectual functioning associated with impairments in adaptive behavior and manifested during the developmental period. {ECO:0000269|PubMed:29100089, ECO:0000269|PubMed:29560374}. Note=The disease is caused by variants affecting the gene repre…	cell differentiation [GO:0030154]; nervous system development [GO:0007399]; positive regulation of dendritic spine morphogenesis [GO:0061003]; positive regulation of neuron projection development [GO:0010976]; positive regulation of synapse maturation [GO:0090129]; protein autophosphorylation [GO:0046777]; protein phosphorylation [GO:0006468]; regulation of calcium ion transport [GO:0051924]; reg…	actin binding [GO:0003779]; ATP binding [GO:0005524]; calmodulin binding [GO:0005516]; calmodulin-dependent protein kinase activity [GO:0004683]; identical protein binding [GO:0042802]; protein homodimerization activity [GO:0042803]; protein serine kinase activity [GO:0106310]	anchoring junction [GO:0070161]; calcium- and calmodulin-dependent protein kinase complex [GO:0005954]; cytoplasm [GO:0005737]; cytosol [GO:0005829]; endocytic vesicle membrane [GO:0030666]; microtubule organizing center [GO:0005815]; neuron projection [GO:0043005]; nucleoplasm [GO:0005654]; sarcoplasmic reticulum membrane [GO:0033017]; synapse [GO:0045202]	GO:0003779; GO:0004683; GO:0005516; GO:0005524; GO:0005654; GO:0005737; GO:0005815; GO:0005829; GO:0005954; GO:0006468; GO:0007165; GO:0007399; GO:0010976; GO:0014733; GO:0030154; GO:0030666; GO:0033017; GO:0042802; GO:0042803; GO:0043005; GO:0045202; GO:0046777; GO:0048169; GO:0051823; GO:0051924; GO:0060998; GO:0061003; GO:0070161; GO:0090129; GO:0106310; GO:2001222	Q13554	0.990462	S367	VKPQTNSTKNSAAATSPKGTLPPAALEPQTT	15.8304	15.6607	15.7854	14.3622	15.2872	14.2141	14.641	13.7409	14.4612	13.8549
CAMK2B_Q13554_S276	0.33821	1.84954	1.16531	0.316412	0.379474	-0.570012	-0.695725	-1.30776	-0.380585	-1.09487	CAMK2B	Calcium/calmodulin-dependent protein kinase type II subunit beta;Calcium/calmodulin-dependent protein kinase type II subunit gamma;Calcium/calmodulin-dependent protein kinase type II subunit delta	Q13554	0.027713	0.669282	sp|Q13554|KCC2B_HUMAN Calcium/calmodulin-dependent protein kinase type II subunit beta OS=Homo sapiens OX=9606 GN=CAMK2B PE=1 SV=3;sp|Q13555|KCC2G_HUMAN Calcium/calmodulin-dependent protein kinase type II subunit gamma OS=Homo sapiens OX=9606 GN=CAMK2G PE=	FUNCTION: Calcium/calmodulin-dependent protein kinase that functions autonomously after Ca(2+)/calmodulin-binding and autophosphorylation, and is involved in dendritic spine and synapse formation, neuronal plasticity and regulation of sarcoplasmic reticulum Ca(2+) transport in skeletal muscle. In neurons, plays an essential structural role in the reorganization of the actin cytoskeleton during pl…	SUBCELLULAR LOCATION: Cytoplasm, cytoskeleton {ECO:0000269|PubMed:21529938}. Cytoplasm, cytoskeleton, microtubule organizing center, centrosome {ECO:0000250}. Sarcoplasmic reticulum membrane {ECO:0000269|PubMed:21529938}; Peripheral membrane protein {ECO:0000269|PubMed:21529938}; Cytoplasmic side {ECO:0000269|PubMed:21529938}. Synapse {ECO:0000250|UniProtKB:P08413}. Note=In slow-twitch muscle, ev…	DISEASE: Intellectual developmental disorder, autosomal dominant 54 (MRD54) [MIM:617799]: A disorder characterized by significantly below average general intellectual functioning associated with impairments in adaptive behavior and manifested during the developmental period. {ECO:0000269|PubMed:29100089, ECO:0000269|PubMed:29560374}. Note=The disease is caused by variants affecting the gene repre…	cell differentiation [GO:0030154]; nervous system development [GO:0007399]; positive regulation of dendritic spine morphogenesis [GO:0061003]; positive regulation of neuron projection development [GO:0010976]; positive regulation of synapse maturation [GO:0090129]; protein autophosphorylation [GO:0046777]; protein phosphorylation [GO:0006468]; regulation of calcium ion transport [GO:0051924]; reg…	actin binding [GO:0003779]; ATP binding [GO:0005524]; calmodulin binding [GO:0005516]; calmodulin-dependent protein kinase activity [GO:0004683]; identical protein binding [GO:0042802]; protein homodimerization activity [GO:0042803]; protein serine kinase activity [GO:0106310]	anchoring junction [GO:0070161]; calcium- and calmodulin-dependent protein kinase complex [GO:0005954]; cytoplasm [GO:0005737]; cytosol [GO:0005829]; endocytic vesicle membrane [GO:0030666]; microtubule organizing center [GO:0005815]; neuron projection [GO:0043005]; nucleoplasm [GO:0005654]; sarcoplasmic reticulum membrane [GO:0033017]; synapse [GO:0045202]	GO:0003779; GO:0004683; GO:0005516; GO:0005524; GO:0005654; GO:0005737; GO:0005815; GO:0005829; GO:0005954; GO:0006468; GO:0007165; GO:0007399; GO:0010976; GO:0014733; GO:0030154; GO:0030666; GO:0033017; GO:0042802; GO:0042803; GO:0043005; GO:0045202; GO:0046777; GO:0048169; GO:0051823; GO:0051924; GO:0060998; GO:0061003; GO:0070161; GO:0090129; GO:0106310; GO:2001222	Q13554;Q13555;Q13557	0.799825	S276	ITADQALKHPWVCQRSTVASMMHRQETVECL;ITAHEALKHPWVCQRSTVASMMHRQETVECL;ITASEALKHPWICQRSTVASMMHRQETVDCL	11.6582	12.2828	12	11.6492	11.6753	11.2829	11.231	10.9781	11.3612	11.066
TTN_Q8WZ42_S306.1	0.643116	0.849052	1.68556	-0.497129	1.22371	-0.944891	-1.07668	-0.575675	-0.798616	-0.508453	TTN	Titin	Q8WZ42	0.027713	0.826038	sp|Q8WZ42|TITIN_HUMAN Titin OS=Homo sapiens OX=9606 GN=TTN PE=1 SV=4	FUNCTION: Key component in the assembly and functioning of vertebrate striated muscles. By providing connections at the level of individual microfilaments, it contributes to the fine balance of forces between the two halves of the sarcomere. The size and extensibility of the cross-links are the main determinants of sarcomere extensibility properties of muscle. In non-muscle cells, seems to play a…	SUBCELLULAR LOCATION: Cytoplasm {ECO:0000305|PubMed:16410549}. Nucleus {ECO:0000269|PubMed:16410549}.	DISEASE: Myopathy, myofibrillar, 9, with early respiratory failure (MFM9) [MIM:603689]: An autosomal dominant myopathy characterized by adulthood onset of weakness in proximal, distal, axial and respiratory muscles. Pelvic girdle weakness, foot drop and neck weakness are the main symptoms at onset, but ultimately the weakness usually involves the proximal compartment of both upper and lower limbs…	cardiac muscle cell development [GO:0055013]; cardiac muscle contraction [GO:0060048]; cardiac muscle hypertrophy [GO:0003300]; cardiac muscle tissue morphogenesis [GO:0055008]; cardiac myofibril assembly [GO:0055003]; detection of muscle stretch [GO:0035995]; mitotic chromosome condensation [GO:0007076]; muscle contraction [GO:0006936]; positive regulation of gene expression [GO:0010628]; positi…	actin filament binding [GO:0051015]; actinin binding [GO:0042805]; ATP binding [GO:0005524]; calcium ion binding [GO:0005509]; calmodulin binding [GO:0005516]; enzyme binding [GO:0019899]; identical protein binding [GO:0042802]; muscle alpha-actinin binding [GO:0051371]; protease binding [GO:0002020]; protein kinase binding [GO:0019901]; protein self-association [GO:0043621]; protein serine kinas…	condensed nuclear chromosome [GO:0000794]; cytosol [GO:0005829]; extracellular exosome [GO:0070062]; extracellular region [GO:0005576]; I band [GO:0031674]; M band [GO:0031430]; striated muscle thin filament [GO:0005865]; titin-telethonin complex [GO:1990733]; Z disc [GO:0030018]	GO:0000794; GO:0002020; GO:0003300; GO:0004674; GO:0004713; GO:0005509; GO:0005516; GO:0005524; GO:0005576; GO:0005829; GO:0005865; GO:0006936; GO:0006941; GO:0007076; GO:0008307; GO:0010628; GO:0010737; GO:0019899; GO:0019901; GO:0030018; GO:0030240; GO:0030241; GO:0031430; GO:0031433; GO:0031674; GO:0035995; GO:0042802; GO:0042805; GO:0043621; GO:0045214; GO:0045859; GO:0048769; GO:0050714; GO:…	Q8WZ42	0.96303	S306	SPVRHVRAPTPSPVRSVSPAARISTSPIRSV	15.5245	15.6335	16.0759	14.9214	15.8316	14.6846	14.6149	14.8799	14.762	14.9155
MYH7_P12883_S560	1.31044	-0.0432953	0.783071	0.459056	1.34453	-1.10901	-1.43649	-0.421225	0.182913	-1.06999	MYH7	Myosin-7	P12883	0.027713	0.921075	sp|P12883|MYH7_HUMAN Myosin-7 OS=Homo sapiens OX=9606 GN=MYH7 PE=1 SV=5	FUNCTION: Myosins are actin-based motor molecules with ATPase activity essential for muscle contraction. Forms regular bipolar thick filaments that, together with actin thin filaments, constitute the fundamental contractile unit of skeletal and cardiac muscle. {ECO:0000305|PubMed:26150528, ECO:0000305|PubMed:26246073}.	SUBCELLULAR LOCATION: Cytoplasm, myofibril {ECO:0000250|UniProtKB:P02564}. Cytoplasm, myofibril, sarcomere {ECO:0000250|UniProtKB:P02564}. Note=Thick filaments of the myofibrils. {ECO:0000250|UniProtKB:P02564}.	DISEASE: Cardiomyopathy, familial hypertrophic 1 (CMH1) [MIM:192600]: A hereditary heart disorder characterized by ventricular hypertrophy, which is usually asymmetric and often involves the interventricular septum. The symptoms include dyspnea, syncope, collapse, palpitations, and chest pain. They can be readily provoked by exercise. The disorder has inter- and intrafamilial variability ranging …	adult heart development [GO:0007512]; ATP metabolic process [GO:0046034]; cardiac muscle contraction [GO:0060048]; cardiac muscle hypertrophy in response to stress [GO:0014898]; muscle contraction [GO:0006936]; muscle filament sliding [GO:0030049]; regulation of heart rate [GO:0002027]; regulation of slow-twitch skeletal muscle fiber contraction [GO:0031449]; regulation of the force of heart cont…	actin filament binding [GO:0051015]; ATP binding [GO:0005524]; calmodulin binding [GO:0005516]; microfilament motor activity [GO:0000146]	muscle myosin complex [GO:0005859]; myofibril [GO:0030016]; myosin complex [GO:0016459]; myosin filament [GO:0032982]; myosin II complex [GO:0016460]; sarcomere [GO:0030017]; stress fiber [GO:0001725]; Z disc [GO:0030018]	GO:0000146; GO:0001725; GO:0002026; GO:0002027; GO:0003009; GO:0005516; GO:0005524; GO:0005859; GO:0006936; GO:0006941; GO:0007512; GO:0014728; GO:0014883; GO:0014898; GO:0016459; GO:0016460; GO:0030016; GO:0030017; GO:0030018; GO:0030049; GO:0031449; GO:0032982; GO:0045214; GO:0046034; GO:0051015; GO:0055010; GO:0060048	P12883	1	S560	DMTFKAKLFDNHLGKSANFQKPRNIKGKPEA	15.4375	14.6286	15.1224	14.9288	15.4579	13.9918	13.7962	14.4028	14.7638	14.0152
AKAP1_Q92667_S592	-0.888341	-1.26172	-1.29141	0.238891	-0.530955	0.840547	0.26565	1.36199	-0.135284	1.40064	AKAP1	A-kinase anchor protein 1, mitochondrial	Q92667	0.0292482	-1.32575	sp|Q92667|AKAP1_HUMAN A-kinase anchor protein 1, mitochondrial OS=Homo sapiens OX=9606 GN=AKAP1 PE=1 SV=1	FUNCTION: Binds to type I and II regulatory subunits of protein kinase A and anchors them to the cytoplasmic face of the mitochondrial outer membrane (By similarity). Involved in mitochondrial-mediated antiviral innate immunity (PubMed:31522117). Promotes translocation of NDUFS1 into mitochondria to regulate mitochondrial membrane respiratory chain NADH dehydrogenase (Complex I) activity (By simi…	SUBCELLULAR LOCATION: Mitochondrion outer membrane {ECO:0000250|UniProtKB:O08715}. Mitochondrion {ECO:0000250|UniProtKB:O08715}.		antiviral innate immune response [GO:0140374]; apoptotic process [GO:0006915]	protein kinase A regulatory subunit binding [GO:0034237]; RNA binding [GO:0003723]	cytosol [GO:0005829]; integral component of membrane [GO:0016021]; membrane [GO:0016020]; mitochondrial outer membrane [GO:0005741]; mitochondrion [GO:0005739]	GO:0003723; GO:0005739; GO:0005741; GO:0005829; GO:0006915; GO:0016020; GO:0016021; GO:0034237; GO:0140374	Q92667	0.938665	S592	SMDSVDSCCSLKKTESFQNAQAGSNPKKVDL	12.9172	12.5857	12.5594	13.9179	13.2344	14.452	13.9416	14.9149	13.5857	14.9492
TTN_Q8WZ42_S323	0.889791	0.0484542	1.27138	0.56841	1.178	-0.225898	-0.347076	-0.357998	-1.55501	-1.47004	TTN	Titin	Q8WZ42	0.0299543	0.714859	sp|Q8WZ42|TITIN_HUMAN Titin OS=Homo sapiens OX=9606 GN=TTN PE=1 SV=4	FUNCTION: Key component in the assembly and functioning of vertebrate striated muscles. By providing connections at the level of individual microfilaments, it contributes to the fine balance of forces between the two halves of the sarcomere. The size and extensibility of the cross-links are the main determinants of sarcomere extensibility properties of muscle. In non-muscle cells, seems to play a…	SUBCELLULAR LOCATION: Cytoplasm {ECO:0000305|PubMed:16410549}. Nucleus {ECO:0000269|PubMed:16410549}.	DISEASE: Myopathy, myofibrillar, 9, with early respiratory failure (MFM9) [MIM:603689]: An autosomal dominant myopathy characterized by adulthood onset of weakness in proximal, distal, axial and respiratory muscles. Pelvic girdle weakness, foot drop and neck weakness are the main symptoms at onset, but ultimately the weakness usually involves the proximal compartment of both upper and lower limbs…	cardiac muscle cell development [GO:0055013]; cardiac muscle contraction [GO:0060048]; cardiac muscle hypertrophy [GO:0003300]; cardiac muscle tissue morphogenesis [GO:0055008]; cardiac myofibril assembly [GO:0055003]; detection of muscle stretch [GO:0035995]; mitotic chromosome condensation [GO:0007076]; muscle contraction [GO:0006936]; positive regulation of gene expression [GO:0010628]; positi…	actin filament binding [GO:0051015]; actinin binding [GO:0042805]; ATP binding [GO:0005524]; calcium ion binding [GO:0005509]; calmodulin binding [GO:0005516]; enzyme binding [GO:0019899]; identical protein binding [GO:0042802]; muscle alpha-actinin binding [GO:0051371]; protease binding [GO:0002020]; protein kinase binding [GO:0019901]; protein self-association [GO:0043621]; protein serine kinas…	condensed nuclear chromosome [GO:0000794]; cytosol [GO:0005829]; extracellular exosome [GO:0070062]; extracellular region [GO:0005576]; I band [GO:0031674]; M band [GO:0031430]; striated muscle thin filament [GO:0005865]; titin-telethonin complex [GO:1990733]; Z disc [GO:0030018]	GO:0000794; GO:0002020; GO:0003300; GO:0004674; GO:0004713; GO:0005509; GO:0005516; GO:0005524; GO:0005576; GO:0005829; GO:0005865; GO:0006936; GO:0006941; GO:0007076; GO:0008307; GO:0010628; GO:0010737; GO:0019899; GO:0019901; GO:0030018; GO:0030240; GO:0030241; GO:0031430; GO:0031433; GO:0031674; GO:0035995; GO:0042802; GO:0042805; GO:0043621; GO:0045214; GO:0045859; GO:0048769; GO:0050714; GO:…	Q8WZ42	0.977209	S323	SPAARISTSPIRSVRSPLLMRKTQASTVATG	15.2495	14.8694	15.4219	15.1043	15.3797	14.7455	14.6907	14.6858	14.145	14.1834
TTN_Q8WZ42_S22456	-1.40645	-0.878258	-0.572695	0.350918	-1.19384	0.0427492	0.311802	0.602496	1.64491	1.09836	TTN	Titin	Q8WZ42	0.0308651	-1.39258	sp|Q8WZ42|TITIN_HUMAN Titin OS=Homo sapiens OX=9606 GN=TTN PE=1 SV=4	FUNCTION: Key component in the assembly and functioning of vertebrate striated muscles. By providing connections at the level of individual microfilaments, it contributes to the fine balance of forces between the two halves of the sarcomere. The size and extensibility of the cross-links are the main determinants of sarcomere extensibility properties of muscle. In non-muscle cells, seems to play a…	SUBCELLULAR LOCATION: Cytoplasm {ECO:0000305|PubMed:16410549}. Nucleus {ECO:0000269|PubMed:16410549}.	DISEASE: Myopathy, myofibrillar, 9, with early respiratory failure (MFM9) [MIM:603689]: An autosomal dominant myopathy characterized by adulthood onset of weakness in proximal, distal, axial and respiratory muscles. Pelvic girdle weakness, foot drop and neck weakness are the main symptoms at onset, but ultimately the weakness usually involves the proximal compartment of both upper and lower limbs…	cardiac muscle cell development [GO:0055013]; cardiac muscle contraction [GO:0060048]; cardiac muscle hypertrophy [GO:0003300]; cardiac muscle tissue morphogenesis [GO:0055008]; cardiac myofibril assembly [GO:0055003]; detection of muscle stretch [GO:0035995]; mitotic chromosome condensation [GO:0007076]; muscle contraction [GO:0006936]; positive regulation of gene expression [GO:0010628]; positi…	actin filament binding [GO:0051015]; actinin binding [GO:0042805]; ATP binding [GO:0005524]; calcium ion binding [GO:0005509]; calmodulin binding [GO:0005516]; enzyme binding [GO:0019899]; identical protein binding [GO:0042802]; muscle alpha-actinin binding [GO:0051371]; protease binding [GO:0002020]; protein kinase binding [GO:0019901]; protein self-association [GO:0043621]; protein serine kinas…	condensed nuclear chromosome [GO:0000794]; cytosol [GO:0005829]; extracellular exosome [GO:0070062]; extracellular region [GO:0005576]; I band [GO:0031674]; M band [GO:0031430]; striated muscle thin filament [GO:0005865]; titin-telethonin complex [GO:1990733]; Z disc [GO:0030018]	GO:0000794; GO:0002020; GO:0003300; GO:0004674; GO:0004713; GO:0005509; GO:0005516; GO:0005524; GO:0005576; GO:0005829; GO:0005865; GO:0006936; GO:0006941; GO:0007076; GO:0008307; GO:0010628; GO:0010737; GO:0019899; GO:0019901; GO:0030018; GO:0030240; GO:0030241; GO:0031430; GO:0031433; GO:0031674; GO:0035995; GO:0042802; GO:0042805; GO:0043621; GO:0045214; GO:0045859; GO:0048769; GO:0050714; GO:…	Q8WZ42	0.999516	S22456	DFSTNLVNKDSTRRDSGAYTLTATNPGGFAK	13.0944	13.5913	13.8788	14.7478	13.2944	14.4578	14.711	14.9845	15.9652	15.451
AKAP2_Q9Y2D5_S152	1.31229	0.600127	0.710651	0.20939	1.29776	-1.27761	-0.349862	-1.47861	-0.180939	-0.843193	AKAP2	A-kinase anchor protein 2	Q9Y2D5	0.0314933	0.580325	sp|Q9Y2D5|AKAP2_HUMAN A-kinase anchor protein 2 OS=Homo sapiens OX=9606 GN=AKAP2 PE=1 SV=3	FUNCTION: Binds to regulatory subunit (RII) of protein kinase A. May be involved in establishing polarity in signaling systems or in integrating PKA-RII isoforms with downstream effectors to capture, amplify and focus diffuse, trans-cellular signals carried by cAMP (By similarity). {ECO:0000250}.							Q9Y2D5	0.974488	S152	SQPRDALGDSLQVPVSPSSTTSSRCSSRDGE	13.8392	13.589	13.6278	13.4518	13.8341	12.9294	13.2553	12.8588	13.3146	13.082
SCN5A_Q14524_S460.1	-1.19851	-0.810291	-0.634126	-0.149634	-0.897808	1.12971	0.971817	1.53672	-0.713165	0.765286	SCN5A	Sodium channel protein type 5 subunit alpha	Q14524	0.0317868	-1.38965	sp|Q14524|SCN5A_HUMAN Sodium channel protein type 5 subunit alpha OS=Homo sapiens OX=9606 GN=SCN5A PE=1 SV=2	FUNCTION: This protein mediates the voltage-dependent sodium ion permeability of excitable membranes. Assuming opened or closed conformations in response to the voltage difference across the membrane, the protein forms a sodium-selective channel through which Na(+) ions may pass in accordance with their electrochemical gradient (PubMed:1309946, PubMed:21447824, PubMed:25370050, PubMed:23420830, P…	SUBCELLULAR LOCATION: Cell membrane {ECO:0000269|PubMed:1309946, ECO:0000269|PubMed:19074138, ECO:0000269|PubMed:21447824, ECO:0000269|PubMed:23085483, ECO:0000269|PubMed:23420830, ECO:0000269|PubMed:25370050, ECO:0000269|PubMed:26279430}; Multi-pass membrane protein {ECO:0000250|UniProtKB:D0E0C2}. Cytoplasm, perinuclear region {ECO:0000269|PubMed:21447824}. Cell membrane, sarcolemma, T-tubule {E…	DISEASE: Progressive familial heart block 1A (PFHB1A) [MIM:113900]: A cardiac bundle branch disorder characterized by progressive alteration of cardiac conduction through the His-Purkinje system, with a pattern of a right bundle-branch block and/or left anterior hemiblock occurring individually or together. It leads to complete atrio-ventricular block causing syncope and sudden death. {ECO:000026…	atrial cardiac muscle cell action potential [GO:0086014]; AV node cell action potential [GO:0086016]; AV node cell to bundle of His cell communication [GO:0086067]; brainstem development [GO:0003360]; bundle of His cell action potential [GO:0086043]; cardiac conduction system development [GO:0003161]; cardiac muscle cell action potential involved in contraction [GO:0086002]; cardiac muscle contra…	ankyrin binding [GO:0030506]; calmodulin binding [GO:0005516]; enzyme binding [GO:0019899]; fibroblast growth factor binding [GO:0017134]; nitric-oxide synthase binding [GO:0050998]; protein domain specific binding [GO:0019904]; protein kinase binding [GO:0019901]; scaffold protein binding [GO:0097110]; transmembrane transporter binding [GO:0044325]; ubiquitin protein ligase binding [GO:0031625];…	caveola [GO:0005901]; cell surface [GO:0009986]; endoplasmic reticulum [GO:0005783]; integral component of membrane [GO:0016021]; intercalated disc [GO:0014704]; lateral plasma membrane [GO:0016328]; nucleolus [GO:0005730]; nucleoplasm [GO:0005654]; perinuclear region of cytoplasm [GO:0048471]; plasma membrane [GO:0005886]; sarcolemma [GO:0042383]; T-tubule [GO:0030315]; voltage-gated sodium chan…	GO:0001518; GO:0002027; GO:0003161; GO:0003231; GO:0003360; GO:0005244; GO:0005248; GO:0005516; GO:0005654; GO:0005730; GO:0005783; GO:0005886; GO:0005901; GO:0006814; GO:0009986; GO:0010765; GO:0014704; GO:0014894; GO:0016021; GO:0016328; GO:0017134; GO:0019228; GO:0019899; GO:0019901; GO:0019904; GO:0021537; GO:0021549; GO:0030018; GO:0030315; GO:0030506; GO:0031625; GO:0035725; GO:0042383; GO:…	Q14524	0.786822	S460	HEALTIRGVDTVSRSSLEMSPLAPVNSHERR	11.2709	11.6363	11.8022	12.2583	11.5539	13.4627	13.314	13.8458	11.7278	13.1196
TTN_Q8WZ42_S33624.1	0.712704	0.600716	1.11235	-0.160976	1.40278	-0.38477	0.186591	-1.81796	-0.669633	-0.981791	TTN	Titin	Q8WZ42	0.0320849	1.56927	sp|Q8WZ42|TITIN_HUMAN Titin OS=Homo sapiens OX=9606 GN=TTN PE=1 SV=4	FUNCTION: Key component in the assembly and functioning of vertebrate striated muscles. By providing connections at the level of individual microfilaments, it contributes to the fine balance of forces between the two halves of the sarcomere. The size and extensibility of the cross-links are the main determinants of sarcomere extensibility properties of muscle. In non-muscle cells, seems to play a…	SUBCELLULAR LOCATION: Cytoplasm {ECO:0000305|PubMed:16410549}. Nucleus {ECO:0000269|PubMed:16410549}.	DISEASE: Myopathy, myofibrillar, 9, with early respiratory failure (MFM9) [MIM:603689]: An autosomal dominant myopathy characterized by adulthood onset of weakness in proximal, distal, axial and respiratory muscles. Pelvic girdle weakness, foot drop and neck weakness are the main symptoms at onset, but ultimately the weakness usually involves the proximal compartment of both upper and lower limbs…	cardiac muscle cell development [GO:0055013]; cardiac muscle contraction [GO:0060048]; cardiac muscle hypertrophy [GO:0003300]; cardiac muscle tissue morphogenesis [GO:0055008]; cardiac myofibril assembly [GO:0055003]; detection of muscle stretch [GO:0035995]; mitotic chromosome condensation [GO:0007076]; muscle contraction [GO:0006936]; positive regulation of gene expression [GO:0010628]; positi…	actin filament binding [GO:0051015]; actinin binding [GO:0042805]; ATP binding [GO:0005524]; calcium ion binding [GO:0005509]; calmodulin binding [GO:0005516]; enzyme binding [GO:0019899]; identical protein binding [GO:0042802]; muscle alpha-actinin binding [GO:0051371]; protease binding [GO:0002020]; protein kinase binding [GO:0019901]; protein self-association [GO:0043621]; protein serine kinas…	condensed nuclear chromosome [GO:0000794]; cytosol [GO:0005829]; extracellular exosome [GO:0070062]; extracellular region [GO:0005576]; I band [GO:0031674]; M band [GO:0031430]; striated muscle thin filament [GO:0005865]; titin-telethonin complex [GO:1990733]; Z disc [GO:0030018]	GO:0000794; GO:0002020; GO:0003300; GO:0004674; GO:0004713; GO:0005509; GO:0005516; GO:0005524; GO:0005576; GO:0005829; GO:0005865; GO:0006936; GO:0006941; GO:0007076; GO:0008307; GO:0010628; GO:0010737; GO:0019899; GO:0019901; GO:0030018; GO:0030240; GO:0030241; GO:0031430; GO:0031433; GO:0031674; GO:0035995; GO:0042802; GO:0042805; GO:0043621; GO:0045214; GO:0045859; GO:0048769; GO:0050714; GO:…	Q8WZ42	0.906607	S33624	PKRVKSPEPSHPKAVSPTETKPTPTEKVQHL	12.4318	12.312	12.8593	11.4973	13.17	11.2579	11.869	9.72478	10.9531	10.6192
TTN_Q8WZ42_T33631.1	0.712704	0.600716	1.11235	-0.160976	1.40278	-0.38477	0.186591	-1.81796	-0.669633	-0.981791	TTN	Titin	Q8WZ42	0.0320849	1.56927	sp|Q8WZ42|TITIN_HUMAN Titin OS=Homo sapiens OX=9606 GN=TTN PE=1 SV=4	FUNCTION: Key component in the assembly and functioning of vertebrate striated muscles. By providing connections at the level of individual microfilaments, it contributes to the fine balance of forces between the two halves of the sarcomere. The size and extensibility of the cross-links are the main determinants of sarcomere extensibility properties of muscle. In non-muscle cells, seems to play a…	SUBCELLULAR LOCATION: Cytoplasm {ECO:0000305|PubMed:16410549}. Nucleus {ECO:0000269|PubMed:16410549}.	DISEASE: Myopathy, myofibrillar, 9, with early respiratory failure (MFM9) [MIM:603689]: An autosomal dominant myopathy characterized by adulthood onset of weakness in proximal, distal, axial and respiratory muscles. Pelvic girdle weakness, foot drop and neck weakness are the main symptoms at onset, but ultimately the weakness usually involves the proximal compartment of both upper and lower limbs…	cardiac muscle cell development [GO:0055013]; cardiac muscle contraction [GO:0060048]; cardiac muscle hypertrophy [GO:0003300]; cardiac muscle tissue morphogenesis [GO:0055008]; cardiac myofibril assembly [GO:0055003]; detection of muscle stretch [GO:0035995]; mitotic chromosome condensation [GO:0007076]; muscle contraction [GO:0006936]; positive regulation of gene expression [GO:0010628]; positi…	actin filament binding [GO:0051015]; actinin binding [GO:0042805]; ATP binding [GO:0005524]; calcium ion binding [GO:0005509]; calmodulin binding [GO:0005516]; enzyme binding [GO:0019899]; identical protein binding [GO:0042802]; muscle alpha-actinin binding [GO:0051371]; protease binding [GO:0002020]; protein kinase binding [GO:0019901]; protein self-association [GO:0043621]; protein serine kinas…	condensed nuclear chromosome [GO:0000794]; cytosol [GO:0005829]; extracellular exosome [GO:0070062]; extracellular region [GO:0005576]; I band [GO:0031674]; M band [GO:0031430]; striated muscle thin filament [GO:0005865]; titin-telethonin complex [GO:1990733]; Z disc [GO:0030018]	GO:0000794; GO:0002020; GO:0003300; GO:0004674; GO:0004713; GO:0005509; GO:0005516; GO:0005524; GO:0005576; GO:0005829; GO:0005865; GO:0006936; GO:0006941; GO:0007076; GO:0008307; GO:0010628; GO:0010737; GO:0019899; GO:0019901; GO:0030018; GO:0030240; GO:0030241; GO:0031430; GO:0031433; GO:0031674; GO:0035995; GO:0042802; GO:0042805; GO:0043621; GO:0045214; GO:0045859; GO:0048769; GO:0050714; GO:…	Q8WZ42	0.922704	T33631	EPSHPKAVSPTETKPTPTEKVQHLPVSAPPK	12.4318	12.312	12.8593	11.4973	13.17	11.2579	11.869	9.72478	10.9531	10.6192
TTN_Q8WZ42_S367	1.07613	1.30436	0.104081	1.28362	0.12906	-1.15512	-0.287897	-0.999832	-0.0233132	-1.43109	TTN	Titin	Q8WZ42	0.0325653	0.731981	sp|Q8WZ42|TITIN_HUMAN Titin OS=Homo sapiens OX=9606 GN=TTN PE=1 SV=4	FUNCTION: Key component in the assembly and functioning of vertebrate striated muscles. By providing connections at the level of individual microfilaments, it contributes to the fine balance of forces between the two halves of the sarcomere. The size and extensibility of the cross-links are the main determinants of sarcomere extensibility properties of muscle. In non-muscle cells, seems to play a…	SUBCELLULAR LOCATION: Cytoplasm {ECO:0000305|PubMed:16410549}. Nucleus {ECO:0000269|PubMed:16410549}.	DISEASE: Myopathy, myofibrillar, 9, with early respiratory failure (MFM9) [MIM:603689]: An autosomal dominant myopathy characterized by adulthood onset of weakness in proximal, distal, axial and respiratory muscles. Pelvic girdle weakness, foot drop and neck weakness are the main symptoms at onset, but ultimately the weakness usually involves the proximal compartment of both upper and lower limbs…	cardiac muscle cell development [GO:0055013]; cardiac muscle contraction [GO:0060048]; cardiac muscle hypertrophy [GO:0003300]; cardiac muscle tissue morphogenesis [GO:0055008]; cardiac myofibril assembly [GO:0055003]; detection of muscle stretch [GO:0035995]; mitotic chromosome condensation [GO:0007076]; muscle contraction [GO:0006936]; positive regulation of gene expression [GO:0010628]; positi…	actin filament binding [GO:0051015]; actinin binding [GO:0042805]; ATP binding [GO:0005524]; calcium ion binding [GO:0005509]; calmodulin binding [GO:0005516]; enzyme binding [GO:0019899]; identical protein binding [GO:0042802]; muscle alpha-actinin binding [GO:0051371]; protease binding [GO:0002020]; protein kinase binding [GO:0019901]; protein self-association [GO:0043621]; protein serine kinas…	condensed nuclear chromosome [GO:0000794]; cytosol [GO:0005829]; extracellular exosome [GO:0070062]; extracellular region [GO:0005576]; I band [GO:0031674]; M band [GO:0031430]; striated muscle thin filament [GO:0005865]; titin-telethonin complex [GO:1990733]; Z disc [GO:0030018]	GO:0000794; GO:0002020; GO:0003300; GO:0004674; GO:0004713; GO:0005509; GO:0005516; GO:0005524; GO:0005576; GO:0005829; GO:0005865; GO:0006936; GO:0006941; GO:0007076; GO:0008307; GO:0010628; GO:0010737; GO:0019899; GO:0019901; GO:0030018; GO:0030240; GO:0030241; GO:0031430; GO:0031433; GO:0031674; GO:0035995; GO:0042802; GO:0042805; GO:0043621; GO:0045214; GO:0045859; GO:0048769; GO:0050714; GO:…	Q8WZ42	0.928032	S367	ASSSEAEMRETTLTTSTQIRTEERWEGRYGV	16.2162	16.3234	15.7598	16.3137	15.7715	15.1685	15.5758	15.2415	15.7	15.039
RYR2_Q92736_S2363	0.492714	1.99379	1.0943	-0.446117	0.592196	-0.609215	-1.03888	-0.508152	-0.569983	-1.00065	RYR2	Ryanodine receptor 2	Q92736	0.0329577	1.07383	sp|Q92736|RYR2_HUMAN Ryanodine receptor 2 OS=Homo sapiens OX=9606 GN=RYR2 PE=1 SV=3	FUNCTION: Calcium channel that mediates the release of Ca(2+) from the sarcoplasmic reticulum into the cytoplasm and thereby plays a key role in triggering cardiac muscle contraction. Aberrant channel activation can lead to cardiac arrhythmia. In cardiac myocytes, calcium release is triggered by increased Ca(2+) levels due to activation of the L-type calcium channel CACNA1C. The calcium channel a…	SUBCELLULAR LOCATION: Sarcoplasmic reticulum membrane {ECO:0000269|PubMed:10830164}; Multi-pass membrane protein {ECO:0000269|PubMed:10830164}. Membrane {ECO:0000305|PubMed:10830164}; Multi-pass membrane protein {ECO:0000305|PubMed:10830164}. Sarcoplasmic reticulum {ECO:0000250|UniProtKB:P30957}. Note=The number of predicted transmembrane domains varies between orthologs, but both N-terminus and …	DISEASE: Arrhythmogenic right ventricular dysplasia, familial, 2 (ARVD2) [MIM:600996]: A congenital heart disease characterized by infiltration of adipose and fibrous tissue into the right ventricle and loss of myocardial cells, resulting in ventricular and supraventricular arrhythmias. {ECO:0000269|PubMed:11159936}. Note=The disease is caused by variants affecting the gene represented in this en…	calcium ion transport [GO:0006816]; calcium ion transport into cytosol [GO:0060402]; calcium-mediated signaling [GO:0019722]; calcium-mediated signaling using intracellular calcium source [GO:0035584]; cardiac muscle contraction [GO:0060048]; cardiac muscle hypertrophy [GO:0003300]; cell communication by electrical coupling involved in cardiac conduction [GO:0086064]; cellular calcium ion homeost…	calcium channel activity [GO:0005262]; calcium ion binding [GO:0005509]; calcium-induced calcium release activity [GO:0048763]; calcium-release channel activity [GO:0015278]; calmodulin binding [GO:0005516]; enzyme binding [GO:0019899]; identical protein binding [GO:0042802]; protein kinase A catalytic subunit binding [GO:0034236]; protein kinase A regulatory subunit binding [GO:0034237]; protein…	calcium channel complex [GO:0034704]; cytoplasmic vesicle membrane [GO:0030659]; junctional sarcoplasmic reticulum membrane [GO:0014701]; membrane [GO:0016020]; plasma membrane [GO:0005886]; protein-containing complex [GO:0032991]; sarcolemma [GO:0042383]; sarcoplasmic reticulum [GO:0016529]; sarcoplasmic reticulum membrane [GO:0033017]; smooth endoplasmic reticulum [GO:0005790]; Z disc [GO:00300…	GO:0001666; GO:0002027; GO:0003143; GO:0003220; GO:0003300; GO:0005219; GO:0005262; GO:0005509; GO:0005513; GO:0005516; GO:0005790; GO:0005886; GO:0006816; GO:0006874; GO:0010460; GO:0010881; GO:0010882; GO:0014701; GO:0014808; GO:0014850; GO:0015278; GO:0016020; GO:0016529; GO:0019722; GO:0019899; GO:0030018; GO:0030659; GO:0031000; GO:0032991; GO:0033017; GO:0034236; GO:0034237; GO:0034704; GO:…	Q92736	0.934016	S2363	EEAIKIAEDPSRDGPSPNSGSSKTLDTEEEE	13.6009	14.6822	14.0343	12.9247	13.6726	12.8072	12.4977	12.88	12.8355	12.5252
TTN_Q8WZ42_S265	0.589547	0.655962	1.94039	-0.190232	0.893397	-0.757776	-0.709828	-1.43338	-0.52492	-0.463159	TTN	Titin	Q8WZ42	0.0329787	0.733646	sp|Q8WZ42|TITIN_HUMAN Titin OS=Homo sapiens OX=9606 GN=TTN PE=1 SV=4	FUNCTION: Key component in the assembly and functioning of vertebrate striated muscles. By providing connections at the level of individual microfilaments, it contributes to the fine balance of forces between the two halves of the sarcomere. The size and extensibility of the cross-links are the main determinants of sarcomere extensibility properties of muscle. In non-muscle cells, seems to play a…	SUBCELLULAR LOCATION: Cytoplasm {ECO:0000305|PubMed:16410549}. Nucleus {ECO:0000269|PubMed:16410549}.	DISEASE: Myopathy, myofibrillar, 9, with early respiratory failure (MFM9) [MIM:603689]: An autosomal dominant myopathy characterized by adulthood onset of weakness in proximal, distal, axial and respiratory muscles. Pelvic girdle weakness, foot drop and neck weakness are the main symptoms at onset, but ultimately the weakness usually involves the proximal compartment of both upper and lower limbs…	cardiac muscle cell development [GO:0055013]; cardiac muscle contraction [GO:0060048]; cardiac muscle hypertrophy [GO:0003300]; cardiac muscle tissue morphogenesis [GO:0055008]; cardiac myofibril assembly [GO:0055003]; detection of muscle stretch [GO:0035995]; mitotic chromosome condensation [GO:0007076]; muscle contraction [GO:0006936]; positive regulation of gene expression [GO:0010628]; positi…	actin filament binding [GO:0051015]; actinin binding [GO:0042805]; ATP binding [GO:0005524]; calcium ion binding [GO:0005509]; calmodulin binding [GO:0005516]; enzyme binding [GO:0019899]; identical protein binding [GO:0042802]; muscle alpha-actinin binding [GO:0051371]; protease binding [GO:0002020]; protein kinase binding [GO:0019901]; protein self-association [GO:0043621]; protein serine kinas…	condensed nuclear chromosome [GO:0000794]; cytosol [GO:0005829]; extracellular exosome [GO:0070062]; extracellular region [GO:0005576]; I band [GO:0031674]; M band [GO:0031430]; striated muscle thin filament [GO:0005865]; titin-telethonin complex [GO:1990733]; Z disc [GO:0030018]	GO:0000794; GO:0002020; GO:0003300; GO:0004674; GO:0004713; GO:0005509; GO:0005516; GO:0005524; GO:0005576; GO:0005829; GO:0005865; GO:0006936; GO:0006941; GO:0007076; GO:0008307; GO:0010628; GO:0010737; GO:0019899; GO:0019901; GO:0030018; GO:0030240; GO:0030241; GO:0031430; GO:0031433; GO:0031674; GO:0035995; GO:0042802; GO:0042805; GO:0043621; GO:0045214; GO:0045859; GO:0048769; GO:0050714; GO:…	Q8WZ42	0.993689	S265	PHKTPPRIPPKPKSRSPTPPSIAAKAQLARQ	16.6552	16.6865	17.2922	16.2874	16.7985	16.0197	16.0424	15.7011	16.1296	16.1587
TTN_Q8WZ42_S21935	-1.54195	-0.627361	-0.94653	0.363061	-0.930982	0.159024	0.341976	0.404152	1.67949	1.09912	TTN	Titin	Q8WZ42	0.0331439	-1.27524	sp|Q8WZ42|TITIN_HUMAN Titin OS=Homo sapiens OX=9606 GN=TTN PE=1 SV=4	FUNCTION: Key component in the assembly and functioning of vertebrate striated muscles. By providing connections at the level of individual microfilaments, it contributes to the fine balance of forces between the two halves of the sarcomere. The size and extensibility of the cross-links are the main determinants of sarcomere extensibility properties of muscle. In non-muscle cells, seems to play a…	SUBCELLULAR LOCATION: Cytoplasm {ECO:0000305|PubMed:16410549}. Nucleus {ECO:0000269|PubMed:16410549}.	DISEASE: Myopathy, myofibrillar, 9, with early respiratory failure (MFM9) [MIM:603689]: An autosomal dominant myopathy characterized by adulthood onset of weakness in proximal, distal, axial and respiratory muscles. Pelvic girdle weakness, foot drop and neck weakness are the main symptoms at onset, but ultimately the weakness usually involves the proximal compartment of both upper and lower limbs…	cardiac muscle cell development [GO:0055013]; cardiac muscle contraction [GO:0060048]; cardiac muscle hypertrophy [GO:0003300]; cardiac muscle tissue morphogenesis [GO:0055008]; cardiac myofibril assembly [GO:0055003]; detection of muscle stretch [GO:0035995]; mitotic chromosome condensation [GO:0007076]; muscle contraction [GO:0006936]; positive regulation of gene expression [GO:0010628]; positi…	actin filament binding [GO:0051015]; actinin binding [GO:0042805]; ATP binding [GO:0005524]; calcium ion binding [GO:0005509]; calmodulin binding [GO:0005516]; enzyme binding [GO:0019899]; identical protein binding [GO:0042802]; muscle alpha-actinin binding [GO:0051371]; protease binding [GO:0002020]; protein kinase binding [GO:0019901]; protein self-association [GO:0043621]; protein serine kinas…	condensed nuclear chromosome [GO:0000794]; cytosol [GO:0005829]; extracellular exosome [GO:0070062]; extracellular region [GO:0005576]; I band [GO:0031674]; M band [GO:0031430]; striated muscle thin filament [GO:0005865]; titin-telethonin complex [GO:1990733]; Z disc [GO:0030018]	GO:0000794; GO:0002020; GO:0003300; GO:0004674; GO:0004713; GO:0005509; GO:0005516; GO:0005524; GO:0005576; GO:0005829; GO:0005865; GO:0006936; GO:0006941; GO:0007076; GO:0008307; GO:0010628; GO:0010737; GO:0019899; GO:0019901; GO:0030018; GO:0030240; GO:0030241; GO:0031430; GO:0031433; GO:0031674; GO:0035995; GO:0042802; GO:0042805; GO:0043621; GO:0045214; GO:0045859; GO:0048769; GO:0050714; GO:…	Q8WZ42	0.999969	S21935	GSKITGYVIEAQRKGSDQWTHITTVKGLECV	13.6802	14.4717	14.1955	15.3288	14.2089	15.1523	15.3106	15.3644	16.4681	15.9659
TTN_Q8WZ42_S726	0.956761	1.11098	-0.591881	1.24564	0.889463	-0.569254	-1.70245	-0.619465	0.0222445	-0.742041	TTN	Titin	Q8WZ42	0.0335828	2.60806	sp|Q8WZ42|TITIN_HUMAN Titin OS=Homo sapiens OX=9606 GN=TTN PE=1 SV=4	FUNCTION: Key component in the assembly and functioning of vertebrate striated muscles. By providing connections at the level of individual microfilaments, it contributes to the fine balance of forces between the two halves of the sarcomere. The size and extensibility of the cross-links are the main determinants of sarcomere extensibility properties of muscle. In non-muscle cells, seems to play a…	SUBCELLULAR LOCATION: Cytoplasm {ECO:0000305|PubMed:16410549}. Nucleus {ECO:0000269|PubMed:16410549}.	DISEASE: Myopathy, myofibrillar, 9, with early respiratory failure (MFM9) [MIM:603689]: An autosomal dominant myopathy characterized by adulthood onset of weakness in proximal, distal, axial and respiratory muscles. Pelvic girdle weakness, foot drop and neck weakness are the main symptoms at onset, but ultimately the weakness usually involves the proximal compartment of both upper and lower limbs…	cardiac muscle cell development [GO:0055013]; cardiac muscle contraction [GO:0060048]; cardiac muscle hypertrophy [GO:0003300]; cardiac muscle tissue morphogenesis [GO:0055008]; cardiac myofibril assembly [GO:0055003]; detection of muscle stretch [GO:0035995]; mitotic chromosome condensation [GO:0007076]; muscle contraction [GO:0006936]; positive regulation of gene expression [GO:0010628]; positi…	actin filament binding [GO:0051015]; actinin binding [GO:0042805]; ATP binding [GO:0005524]; calcium ion binding [GO:0005509]; calmodulin binding [GO:0005516]; enzyme binding [GO:0019899]; identical protein binding [GO:0042802]; muscle alpha-actinin binding [GO:0051371]; protease binding [GO:0002020]; protein kinase binding [GO:0019901]; protein self-association [GO:0043621]; protein serine kinas…	condensed nuclear chromosome [GO:0000794]; cytosol [GO:0005829]; extracellular exosome [GO:0070062]; extracellular region [GO:0005576]; I band [GO:0031674]; M band [GO:0031430]; striated muscle thin filament [GO:0005865]; titin-telethonin complex [GO:1990733]; Z disc [GO:0030018]	GO:0000794; GO:0002020; GO:0003300; GO:0004674; GO:0004713; GO:0005509; GO:0005516; GO:0005524; GO:0005576; GO:0005829; GO:0005865; GO:0006936; GO:0006941; GO:0007076; GO:0008307; GO:0010628; GO:0010737; GO:0019899; GO:0019901; GO:0030018; GO:0030240; GO:0030241; GO:0031430; GO:0031433; GO:0031674; GO:0035995; GO:0042802; GO:0042805; GO:0043621; GO:0045214; GO:0045859; GO:0048769; GO:0050714; GO:…	Q8WZ42	0.998583	S726	QARVREPREPGHLEESYAQQTTLEYGYKERI	13.0416	13.32	10.2452	13.5632	12.92	10.2861	8.23994	10.1954	11.3541	9.97411
PDLIM5_Q96HC4_S438	1.14414	0.47716	1.97742	-0.0449557	0.109377	-1.18738	-1.02834	-0.676814	0.0126784	-0.78328	PDLIM5	PDZ and LIM domain protein 5	Q96HC4	0.0341199	1.35048	sp|Q96HC4|PDLI5_HUMAN PDZ and LIM domain protein 5 OS=Homo sapiens OX=9606 GN=PDLIM5 PE=1 SV=5	FUNCTION: May play an important role in the heart development by scaffolding PKC to the Z-disk region. May play a role in the regulation of cardiomyocyte expansion. Isoforms lacking the LIM domains may negatively modulate the scaffolding activity of isoform 1. Overexpression promotes the development of heart hypertrophy. Contributes to the regulation of dendritic spine morphogenesis in neurons. M…	SUBCELLULAR LOCATION: Postsynaptic density {ECO:0000250|UniProtKB:Q62920}. Presynapse {ECO:0000250|UniProtKB:Q62920}. Postsynapse {ECO:0000250|UniProtKB:Q62920}. Cytoplasm, cytosol {ECO:0000250|UniProtKB:Q62920}. Note=Detected both at presynaptic and postsynaptic sites, exclusively at excitatory synapses, but not inhibitory synapses, in hippocampal neurons. {ECO:0000250|UniProtKB:Q62920}.		actin cytoskeleton organization [GO:0030036]; cell growth involved in cardiac muscle cell development [GO:0061049]; heart development [GO:0007507]; muscle structure development [GO:0061061]; regulation of dendritic spine morphogenesis [GO:0061001]; regulation of synapse assembly [GO:0051963]	actin binding [GO:0003779]; actinin binding [GO:0042805]; cadherin binding involved in cell-cell adhesion [GO:0098641]; metal ion binding [GO:0046872]; muscle alpha-actinin binding [GO:0051371]; protein kinase C binding [GO:0005080]	actin cytoskeleton [GO:0015629]; adherens junction [GO:0005912]; cell projection [GO:0042995]; cytosol [GO:0005829]; filamentous actin [GO:0031941]; membrane [GO:0016020]; postsynaptic density [GO:0014069]; presynapse [GO:0098793]; stress fiber [GO:0001725]; Z disc [GO:0030018]	GO:0001725; GO:0003779; GO:0005080; GO:0005829; GO:0005912; GO:0007507; GO:0014069; GO:0015629; GO:0016020; GO:0030018; GO:0030036; GO:0031941; GO:0042805; GO:0042995; GO:0046872; GO:0051371; GO:0051963; GO:0061001; GO:0061049; GO:0061061; GO:0098641; GO:0098793	Q96HC4	1	S438	CNQVIRGPFLVALGKSWHPEEFNCAHCKNTM	13.1103	12.4955	13.8783	12.0143	12.1566	10.9614	11.108	11.432	12.0674	11.3338
SYNPO2_Q9UMS6_S781.1	0.94524	0.40297	0.767548	0.418407	1.07249	-0.996005	0.42483	-2	-0.125018	-0.904709	SYNPO2	Synaptopodin-2	Q9UMS6	0.0362344	1.71222	sp|Q9UMS6|SYNP2_HUMAN Synaptopodin-2 OS=Homo sapiens OX=9606 GN=SYNPO2 PE=1 SV=2	FUNCTION: Has an actin-binding and actin-bundling activity. Can induce the formation of F-actin networks in an isoform-specific manner (PubMed:24005909, PubMed:23225103). At the sarcomeric Z lines is proposed to act as adapter protein that links nascent myofibers to the sarcolemma via ZYX and may play a role in early assembly and stabilization of the Z lines. Involved in autophagosome formation. …	SUBCELLULAR LOCATION: Nucleus {ECO:0000250|UniProtKB:Q91YE8}. Cytoplasm {ECO:0000250|UniProtKB:Q91YE8}. Cytoplasm, cytoskeleton {ECO:0000269|PubMed:24005909}. Cytoplasm, myofibril, sarcomere, Z line {ECO:0000269|PubMed:20554076}. Cell junction, focal adhesion {ECO:0000269|PubMed:20554076}. Note=Shuttles between the nucleus and the cytoplasm in a differentiation-dependent and stress-induced fashio…		autophagosome assembly [GO:0000045]; chaperone-mediated autophagy [GO:0061684]; positive regulation of actin filament bundle assembly [GO:0032233]; positive regulation of cell migration [GO:0030335]; regulation of Rho-dependent protein serine/threonine kinase activity [GO:2000298]	14-3-3 protein binding [GO:0071889]; actin binding [GO:0003779]; alpha-actinin binding [GO:0051393]; filamin binding [GO:0031005]; muscle alpha-actinin binding [GO:0051371]; protein-macromolecule adaptor activity [GO:0030674]	actin cytoskeleton [GO:0015629]; cytosol [GO:0005829]; focal adhesion [GO:0005925]; intracellular membrane-bounded organelle [GO:0043231]; nucleoplasm [GO:0005654]; nucleus [GO:0005634]; stress fiber [GO:0001725]; vesicle tethering complex [GO:0099023]; Z disc [GO:0030018]	GO:0000045; GO:0001725; GO:0003779; GO:0005634; GO:0005654; GO:0005829; GO:0005925; GO:0015629; GO:0030018; GO:0030335; GO:0030674; GO:0031005; GO:0032233; GO:0043231; GO:0051371; GO:0051393; GO:0061684; GO:0071889; GO:0099023; GO:2000298	Q9UMS6	0.986871	S781	KSSSSQPVTPVSPVWSPGVAPTQPPAFPTSN	17.9666	17.323	17.7557	17.3413	18.1176	15.6626	17.3489	14.4642	16.6963	15.771
PPP3CC_P48454_S463	-0.756778	-1.2366	-1.26864	0.198681	-0.575666	0.877409	0.709368	1.51781	-0.506803	1.04122	PPP3CC	Serine/threonine-protein phosphatase 2B catalytic subunit gamma isoform	P48454	0.0362825	-1.31226	sp|P48454|PP2BC_HUMAN Serine/threonine-protein phosphatase 2B catalytic subunit gamma isoform OS=Homo sapiens OX=9606 GN=PPP3CC PE=1 SV=3	FUNCTION: Calcium-dependent, calmodulin-stimulated protein phosphatase which plays an essential role in the transduction of intracellular Ca(2+)-mediated signals. Dephosphorylates and activates transcription factor NFATC1. Dephosphorylates and inactivates transcription factor ELK1. Dephosphorylates DARPP32. {ECO:0000269|PubMed:19154138}.	SUBCELLULAR LOCATION: Mitochondrion {ECO:0000250|UniProtKB:P48455}. Note=Localizes in the mitochondria in a SPATA33-dependent manner. {ECO:0000250|UniProtKB:P48455}.		brain development [GO:0007420]; calcineurin-mediated signaling [GO:0097720]; calcineurin-NFAT signaling cascade [GO:0033173]; negative regulation of calcium ion import across plasma membrane [GO:1905949]; negative regulation of voltage-gated calcium channel activity [GO:1901386]; positive regulation of calcineurin-NFAT signaling cascade [GO:0070886]; positive regulation of calcium ion import acro…	calcium-dependent protein serine/threonine phosphatase activity [GO:0004723]; calmodulin binding [GO:0005516]; calmodulin-dependent protein phosphatase activity [GO:0033192]; metal ion binding [GO:0046872]; myosin phosphatase activity [GO:0017018]	calcineurin complex [GO:0005955]; cytoplasm [GO:0005737]; cytosol [GO:0005829]; glutamatergic synapse [GO:0098978]; mitochondrion [GO:0005739]; presynapse [GO:0098793]; protein serine/threonine phosphatase complex [GO:0008287]	GO:0004723; GO:0005516; GO:0005737; GO:0005739; GO:0005829; GO:0005955; GO:0006470; GO:0007420; GO:0008287; GO:0017018; GO:0033173; GO:0033192; GO:0046872; GO:0070886; GO:0097720; GO:0098793; GO:0098978; GO:1900244; GO:1901386; GO:1901387; GO:1905665; GO:1905949	P48454	1	S463	AREAIRGFSLQHKIRSFEEARGLDRINERMP	12.7009	12.2683	12.2394	13.5622	12.8641	14.1741	14.0226	14.7514	12.9262	14.3218
JPH2_Q9BR39_S247	-1.41744	-1.06644	-0.738197	-0.190782	-0.21253	1.15464	1.15304	0.86257	-0.698926	1.15406	JPH2	Junctophilin-2	Q9BR39	0.0368411	-1.37277	sp|Q9BR39|JPH2_HUMAN Junctophilin-2 OS=Homo sapiens OX=9606 GN=JPH2 PE=1 SV=2	FUNCTION: [Junctophilin-2]: Membrane-binding protein that provides a structural bridge between the plasma membrane and the sarcoplasmic reticulum and is required for normal excitation-contraction coupling in cardiomyocytes (PubMed:20095964). Provides a structural foundation for functional cross-talk between the cell surface and intracellular Ca(2+) release channels by maintaining the 12-15 nm gap…	SUBCELLULAR LOCATION: [Junctophilin-2]: Cell membrane {ECO:0000250|UniProtKB:Q9ET78}; Peripheral membrane protein {ECO:0000250|UniProtKB:Q9ET78}. Sarcoplasmic reticulum membrane {ECO:0000250|UniProtKB:Q9ET78}; Single-pass type IV membrane protein {ECO:0000250|UniProtKB:Q9ET78}. Endoplasmic reticulum membrane {ECO:0000250|UniProtKB:Q9ET78}; Single-pass type IV membrane protein {ECO:0000250|UniProt…	DISEASE: Cardiomyopathy, familial hypertrophic 17 (CMH17) [MIM:613873]: A hereditary heart disorder characterized by ventricular hypertrophy, which is usually asymmetric and often involves the interventricular septum. The symptoms include dyspnea, syncope, collapse, palpitations, and chest pain. They can be readily provoked by exercise. The disorder has inter- and intrafamilial variability rangin…	calcium ion homeostasis [GO:0055074]; calcium ion transport into cytosol [GO:0060402]; negative regulation of transcription by RNA polymerase II [GO:0000122]; negative regulation of transcription, DNA-templated [GO:0045892]; positive regulation of ryanodine-sensitive calcium-release channel activity [GO:0060316]; regulation of cardiac muscle tissue development [GO:0055024]; regulation of ryanodin…	core promoter sequence-specific DNA binding [GO:0001046]; DNA binding [GO:0003677]; DNA-binding transcription repressor activity, RNA polymerase II-specific [GO:0001227]; phosphatidic acid binding [GO:0070300]; phosphatidylinositol-3,4,5-trisphosphate binding [GO:0005547]; phosphatidylinositol-3,5-bisphosphate binding [GO:0080025]; phosphatidylinositol-3-phosphate binding [GO:0032266]; phosphatid…	endoplasmic reticulum membrane [GO:0005789]; integral component of membrane [GO:0016021]; junctional membrane complex [GO:0030314]; junctional sarcoplasmic reticulum membrane [GO:0014701]; nucleus [GO:0005634]; plasma membrane [GO:0005886]; sarcoplasmic reticulum [GO:0016529]; Z disc [GO:0030018]	GO:0000122; GO:0001046; GO:0001227; GO:0001786; GO:0003677; GO:0005546; GO:0005547; GO:0005634; GO:0005789; GO:0005886; GO:0010314; GO:0014701; GO:0016021; GO:0016529; GO:0030018; GO:0030314; GO:0032266; GO:0045892; GO:0055024; GO:0055074; GO:0060314; GO:0060316; GO:0060402; GO:0070273; GO:0070300; GO:0080025	Q9BR39	0.999949	S247	RAESRTSVGSQRSRVSFLKSDLSSGASDAAS	11.7687	12.1009	12.4116	12.9299	12.9093	14.2035	14.202	13.927	12.4488	14.2029
TTN_Q8WZ42_T3807	0.95972	0.966257	-0.410482	0.72929	1.40549	-0.584885	-0.285403	-1.89623	-0.614753	-0.269007	TTN	Titin	Q8WZ42	0.0370357	1.1771	sp|Q8WZ42|TITIN_HUMAN Titin OS=Homo sapiens OX=9606 GN=TTN PE=1 SV=4	FUNCTION: Key component in the assembly and functioning of vertebrate striated muscles. By providing connections at the level of individual microfilaments, it contributes to the fine balance of forces between the two halves of the sarcomere. The size and extensibility of the cross-links are the main determinants of sarcomere extensibility properties of muscle. In non-muscle cells, seems to play a…	SUBCELLULAR LOCATION: Cytoplasm {ECO:0000305|PubMed:16410549}. Nucleus {ECO:0000269|PubMed:16410549}.	DISEASE: Myopathy, myofibrillar, 9, with early respiratory failure (MFM9) [MIM:603689]: An autosomal dominant myopathy characterized by adulthood onset of weakness in proximal, distal, axial and respiratory muscles. Pelvic girdle weakness, foot drop and neck weakness are the main symptoms at onset, but ultimately the weakness usually involves the proximal compartment of both upper and lower limbs…	cardiac muscle cell development [GO:0055013]; cardiac muscle contraction [GO:0060048]; cardiac muscle hypertrophy [GO:0003300]; cardiac muscle tissue morphogenesis [GO:0055008]; cardiac myofibril assembly [GO:0055003]; detection of muscle stretch [GO:0035995]; mitotic chromosome condensation [GO:0007076]; muscle contraction [GO:0006936]; positive regulation of gene expression [GO:0010628]; positi…	actin filament binding [GO:0051015]; actinin binding [GO:0042805]; ATP binding [GO:0005524]; calcium ion binding [GO:0005509]; calmodulin binding [GO:0005516]; enzyme binding [GO:0019899]; identical protein binding [GO:0042802]; muscle alpha-actinin binding [GO:0051371]; protease binding [GO:0002020]; protein kinase binding [GO:0019901]; protein self-association [GO:0043621]; protein serine kinas…	condensed nuclear chromosome [GO:0000794]; cytosol [GO:0005829]; extracellular exosome [GO:0070062]; extracellular region [GO:0005576]; I band [GO:0031674]; M band [GO:0031430]; striated muscle thin filament [GO:0005865]; titin-telethonin complex [GO:1990733]; Z disc [GO:0030018]	GO:0000794; GO:0002020; GO:0003300; GO:0004674; GO:0004713; GO:0005509; GO:0005516; GO:0005524; GO:0005576; GO:0005829; GO:0005865; GO:0006936; GO:0006941; GO:0007076; GO:0008307; GO:0010628; GO:0010737; GO:0019899; GO:0019901; GO:0030018; GO:0030240; GO:0030241; GO:0031430; GO:0031433; GO:0031674; GO:0035995; GO:0042802; GO:0042805; GO:0043621; GO:0045214; GO:0045859; GO:0048769; GO:0050714; GO:…	Q8WZ42	0.928019	T3807	LGAQELQSILEQDKLTPESTREFLCINGSIH	10.3748	10.3801	9.27017	10.189	10.7342	9.12957	9.371	8.0724	9.10549	9.38422
TTN_Q8WZ42_S263	0.49327	0.939228	1.51292	-0.311421	1.07677	-1.06729	-0.663969	-1.56599	0.118356	-0.53188	TTN	Titin	Q8WZ42	0.0380023	0.908588	sp|Q8WZ42|TITIN_HUMAN Titin OS=Homo sapiens OX=9606 GN=TTN PE=1 SV=4	FUNCTION: Key component in the assembly and functioning of vertebrate striated muscles. By providing connections at the level of individual microfilaments, it contributes to the fine balance of forces between the two halves of the sarcomere. The size and extensibility of the cross-links are the main determinants of sarcomere extensibility properties of muscle. In non-muscle cells, seems to play a…	SUBCELLULAR LOCATION: Cytoplasm {ECO:0000305|PubMed:16410549}. Nucleus {ECO:0000269|PubMed:16410549}.	DISEASE: Myopathy, myofibrillar, 9, with early respiratory failure (MFM9) [MIM:603689]: An autosomal dominant myopathy characterized by adulthood onset of weakness in proximal, distal, axial and respiratory muscles. Pelvic girdle weakness, foot drop and neck weakness are the main symptoms at onset, but ultimately the weakness usually involves the proximal compartment of both upper and lower limbs…	cardiac muscle cell development [GO:0055013]; cardiac muscle contraction [GO:0060048]; cardiac muscle hypertrophy [GO:0003300]; cardiac muscle tissue morphogenesis [GO:0055008]; cardiac myofibril assembly [GO:0055003]; detection of muscle stretch [GO:0035995]; mitotic chromosome condensation [GO:0007076]; muscle contraction [GO:0006936]; positive regulation of gene expression [GO:0010628]; positi…	actin filament binding [GO:0051015]; actinin binding [GO:0042805]; ATP binding [GO:0005524]; calcium ion binding [GO:0005509]; calmodulin binding [GO:0005516]; enzyme binding [GO:0019899]; identical protein binding [GO:0042802]; muscle alpha-actinin binding [GO:0051371]; protease binding [GO:0002020]; protein kinase binding [GO:0019901]; protein self-association [GO:0043621]; protein serine kinas…	condensed nuclear chromosome [GO:0000794]; cytosol [GO:0005829]; extracellular exosome [GO:0070062]; extracellular region [GO:0005576]; I band [GO:0031674]; M band [GO:0031430]; striated muscle thin filament [GO:0005865]; titin-telethonin complex [GO:1990733]; Z disc [GO:0030018]	GO:0000794; GO:0002020; GO:0003300; GO:0004674; GO:0004713; GO:0005509; GO:0005516; GO:0005524; GO:0005576; GO:0005829; GO:0005865; GO:0006936; GO:0006941; GO:0007076; GO:0008307; GO:0010628; GO:0010737; GO:0019899; GO:0019901; GO:0030018; GO:0030240; GO:0030241; GO:0031430; GO:0031433; GO:0031674; GO:0035995; GO:0042802; GO:0042805; GO:0043621; GO:0045214; GO:0045859; GO:0048769; GO:0050714; GO:…	Q8WZ42	0.996774	S263	QLPHKTPPRIPPKPKSRSPTPPSIAAKAQLA	12.7899	13.0629	13.4141	12.2973	13.1471	11.8346	12.0815	11.5294	12.5604	12.1624
BIN1_O00499_S296	1.01301	0.708444	0.723377	-0.257534	1.5599	-1.60363	-1.24619	-0.138289	-0.472268	-0.286817	BIN1	Myc box-dependent-interacting protein 1	O00499	0.0391994	0.806532	sp|O00499|BIN1_HUMAN Myc box-dependent-interacting protein 1 OS=Homo sapiens OX=9606 GN=BIN1 PE=1 SV=1	FUNCTION: Is a key player in the control of plasma membrane curvature, membrane shaping and membrane remodeling. Required in muscle cells for the formation of T-tubules, tubular invaginations of the plasma membrane that function in depolarization-contraction coupling (PubMed:24755653). Is a negative regulator of endocytosis (By similarity). Is also involved in the regulation of intracellular vesi…	SUBCELLULAR LOCATION: [Isoform BIN1]: Nucleus {ECO:0000269|PubMed:8782822}. Cytoplasm {ECO:0000269|PubMed:9182667}. Endosome {ECO:0000250|UniProtKB:O08539}. Cell membrane, sarcolemma, T-tubule {ECO:0000250|UniProtKB:O08839}.; SUBCELLULAR LOCATION: [Isoform IIA]: Cytoplasm {ECO:0000269|PubMed:9182667}.	DISEASE: Myopathy, centronuclear, 2 (CNM2) [MIM:255200]: A congenital muscle disorder characterized by progressive muscular weakness and wasting involving mainly limb girdle, trunk, and neck muscles. It may also affect distal muscles. Weakness may be present during childhood or adolescence or may not become evident until the third decade of life. Ptosis is a frequent clinical feature. The most pr…	cytoskeleton organization [GO:0007010]; endocytosis [GO:0006897]; endosome to lysosome transport [GO:0008333]; lipid tube assembly [GO:0060988]; negative regulation of amyloid-beta formation [GO:1902430]; negative regulation of aspartic-type endopeptidase activity involved in amyloid precursor protein catabolic process [GO:1902960]; negative regulation of calcium ion transmembrane transport via h…	actin filament binding [GO:0051015]; aspartic-type endopeptidase inhibitor activity [GO:0019828]; chaperone binding [GO:0051087]; clathrin binding [GO:0030276]; GTPase binding [GO:0051020]; identical protein binding [GO:0042802]; phospholipid binding [GO:0005543]; protease binding [GO:0002020]; RNA polymerase binding [GO:0070063]; tau protein binding [GO:0048156]	actin cytoskeleton [GO:0015629]; axon [GO:0030424]; axon initial segment [GO:0043194]; axon terminus [GO:0043679]; cerebellar mossy fiber [GO:0044300]; cytoplasm [GO:0005737]; cytosol [GO:0005829]; dendrite [GO:0030425]; endosome [GO:0005768]; extrinsic component of synaptic vesicle membrane [GO:0098850]; glutamatergic synapse [GO:0098978]; I band [GO:0031674]; lipid tube [GO:0060987]; membrane […	GO:0000122; GO:0002020; GO:0005543; GO:0005634; GO:0005635; GO:0005737; GO:0005768; GO:0005829; GO:0005886; GO:0006897; GO:0006997; GO:0007010; GO:0008021; GO:0008333; GO:0010564; GO:0015629; GO:0016020; GO:0019828; GO:0030018; GO:0030276; GO:0030315; GO:0030424; GO:0030425; GO:0030838; GO:0031674; GO:0031982; GO:0033268; GO:0033292; GO:0042802; GO:0043065; GO:0043194; GO:0043196; GO:0043547; GO:…	O00499	0.949211	S296	VKAQPSDNAPAKGNKSPSPPDGSPAATPEIR	15.9509	15.787	15.7951	15.2672	16.2452	14.5429	14.7352	15.3314	15.1517	15.2515
SCN5A_Q14524_S577.1	0.518543	0.833389	1.11495	0.257812	0.987977	0.220385	-0.950553	-1.37482	-1.70282	0.0951299	SCN5A	Sodium channel protein type 5 subunit alpha	Q14524	0.0398579	0.857604	sp|Q14524|SCN5A_HUMAN Sodium channel protein type 5 subunit alpha OS=Homo sapiens OX=9606 GN=SCN5A PE=1 SV=2	FUNCTION: This protein mediates the voltage-dependent sodium ion permeability of excitable membranes. Assuming opened or closed conformations in response to the voltage difference across the membrane, the protein forms a sodium-selective channel through which Na(+) ions may pass in accordance with their electrochemical gradient (PubMed:1309946, PubMed:21447824, PubMed:25370050, PubMed:23420830, P…	SUBCELLULAR LOCATION: Cell membrane {ECO:0000269|PubMed:1309946, ECO:0000269|PubMed:19074138, ECO:0000269|PubMed:21447824, ECO:0000269|PubMed:23085483, ECO:0000269|PubMed:23420830, ECO:0000269|PubMed:25370050, ECO:0000269|PubMed:26279430}; Multi-pass membrane protein {ECO:0000250|UniProtKB:D0E0C2}. Cytoplasm, perinuclear region {ECO:0000269|PubMed:21447824}. Cell membrane, sarcolemma, T-tubule {E…	DISEASE: Progressive familial heart block 1A (PFHB1A) [MIM:113900]: A cardiac bundle branch disorder characterized by progressive alteration of cardiac conduction through the His-Purkinje system, with a pattern of a right bundle-branch block and/or left anterior hemiblock occurring individually or together. It leads to complete atrio-ventricular block causing syncope and sudden death. {ECO:000026…	atrial cardiac muscle cell action potential [GO:0086014]; AV node cell action potential [GO:0086016]; AV node cell to bundle of His cell communication [GO:0086067]; brainstem development [GO:0003360]; bundle of His cell action potential [GO:0086043]; cardiac conduction system development [GO:0003161]; cardiac muscle cell action potential involved in contraction [GO:0086002]; cardiac muscle contra…	ankyrin binding [GO:0030506]; calmodulin binding [GO:0005516]; enzyme binding [GO:0019899]; fibroblast growth factor binding [GO:0017134]; nitric-oxide synthase binding [GO:0050998]; protein domain specific binding [GO:0019904]; protein kinase binding [GO:0019901]; scaffold protein binding [GO:0097110]; transmembrane transporter binding [GO:0044325]; ubiquitin protein ligase binding [GO:0031625];…	caveola [GO:0005901]; cell surface [GO:0009986]; endoplasmic reticulum [GO:0005783]; integral component of membrane [GO:0016021]; intercalated disc [GO:0014704]; lateral plasma membrane [GO:0016328]; nucleolus [GO:0005730]; nucleoplasm [GO:0005654]; perinuclear region of cytoplasm [GO:0048471]; plasma membrane [GO:0005886]; sarcolemma [GO:0042383]; T-tubule [GO:0030315]; voltage-gated sodium chan…	GO:0001518; GO:0002027; GO:0003161; GO:0003231; GO:0003360; GO:0005244; GO:0005248; GO:0005516; GO:0005654; GO:0005730; GO:0005783; GO:0005886; GO:0005901; GO:0006814; GO:0009986; GO:0010765; GO:0014704; GO:0014894; GO:0016021; GO:0016328; GO:0017134; GO:0019228; GO:0019899; GO:0019901; GO:0019904; GO:0021537; GO:0021549; GO:0030018; GO:0030315; GO:0030506; GO:0031625; GO:0035725; GO:0042383; GO:…	Q14524	0.996062	S577	LVPWPLRRTSAQGQPSPGTSAPGHALHGKKN	14.2732	14.455	14.6176	14.1226	14.5443	14.101	13.4248	13.1798	12.9904	14.0287
RYR2_Q92736_S2811.2	-1.0084	-1.27674	-0.533147	-0.452524	-0.859268	0.975553	0.594431	1.83509	0.0540647	0.670937	RYR2	Ryanodine receptor 2	Q92736	0.0414197	-0.514091	sp|Q92736|RYR2_HUMAN Ryanodine receptor 2 OS=Homo sapiens OX=9606 GN=RYR2 PE=1 SV=3	FUNCTION: Calcium channel that mediates the release of Ca(2+) from the sarcoplasmic reticulum into the cytoplasm and thereby plays a key role in triggering cardiac muscle contraction. Aberrant channel activation can lead to cardiac arrhythmia. In cardiac myocytes, calcium release is triggered by increased Ca(2+) levels due to activation of the L-type calcium channel CACNA1C. The calcium channel a…	SUBCELLULAR LOCATION: Sarcoplasmic reticulum membrane {ECO:0000269|PubMed:10830164}; Multi-pass membrane protein {ECO:0000269|PubMed:10830164}. Membrane {ECO:0000305|PubMed:10830164}; Multi-pass membrane protein {ECO:0000305|PubMed:10830164}. Sarcoplasmic reticulum {ECO:0000250|UniProtKB:P30957}. Note=The number of predicted transmembrane domains varies between orthologs, but both N-terminus and …	DISEASE: Arrhythmogenic right ventricular dysplasia, familial, 2 (ARVD2) [MIM:600996]: A congenital heart disease characterized by infiltration of adipose and fibrous tissue into the right ventricle and loss of myocardial cells, resulting in ventricular and supraventricular arrhythmias. {ECO:0000269|PubMed:11159936}. Note=The disease is caused by variants affecting the gene represented in this en…	calcium ion transport [GO:0006816]; calcium ion transport into cytosol [GO:0060402]; calcium-mediated signaling [GO:0019722]; calcium-mediated signaling using intracellular calcium source [GO:0035584]; cardiac muscle contraction [GO:0060048]; cardiac muscle hypertrophy [GO:0003300]; cell communication by electrical coupling involved in cardiac conduction [GO:0086064]; cellular calcium ion homeost…	calcium channel activity [GO:0005262]; calcium ion binding [GO:0005509]; calcium-induced calcium release activity [GO:0048763]; calcium-release channel activity [GO:0015278]; calmodulin binding [GO:0005516]; enzyme binding [GO:0019899]; identical protein binding [GO:0042802]; protein kinase A catalytic subunit binding [GO:0034236]; protein kinase A regulatory subunit binding [GO:0034237]; protein…	calcium channel complex [GO:0034704]; cytoplasmic vesicle membrane [GO:0030659]; junctional sarcoplasmic reticulum membrane [GO:0014701]; membrane [GO:0016020]; plasma membrane [GO:0005886]; protein-containing complex [GO:0032991]; sarcolemma [GO:0042383]; sarcoplasmic reticulum [GO:0016529]; sarcoplasmic reticulum membrane [GO:0033017]; smooth endoplasmic reticulum [GO:0005790]; Z disc [GO:00300…	GO:0001666; GO:0002027; GO:0003143; GO:0003220; GO:0003300; GO:0005219; GO:0005262; GO:0005509; GO:0005513; GO:0005516; GO:0005790; GO:0005886; GO:0006816; GO:0006874; GO:0010460; GO:0010881; GO:0010882; GO:0014701; GO:0014808; GO:0014850; GO:0015278; GO:0016020; GO:0016529; GO:0019722; GO:0019899; GO:0030018; GO:0030659; GO:0031000; GO:0032991; GO:0033017; GO:0034236; GO:0034237; GO:0034704; GO:…	Q92736	0.961245	S2811	DSMALYNRTRRISQTSQVSVDAAHGYSPRAI	14.3976	14.3141	14.5455	14.5706	14.444	15.015	14.8964	15.2825	14.7283	14.9202
KCNH2_Q12809_S255	-1.97166	-0.941754	-0.149076	0.134722	-0.82117	0.00709324	0.890138	1.01096	0.954859	0.885881	KCNH2	Potassium voltage-gated channel subfamily H member 2	Q12809	0.0421323	-0.754819	sp|Q12809|KCNH2_HUMAN Potassium voltage-gated channel subfamily H member 2 OS=Homo sapiens OX=9606 GN=KCNH2 PE=1 SV=1	FUNCTION: Pore-forming (alpha) subunit of voltage-gated inwardly rectifying potassium channel. Channel properties are modulated by cAMP and subunit assembly. Mediates the rapidly activating component of the delayed rectifying potassium current in heart (IKr) (PubMed:18559421, PubMed:26363003, PubMed:27916661). {ECO:0000269|PubMed:18559421, ECO:0000269|PubMed:26363003, ECO:0000269|PubMed:27916661}…	SUBCELLULAR LOCATION: Cell membrane {ECO:0000269|PubMed:18559421, ECO:0000269|PubMed:19412172, ECO:0000269|PubMed:26363003}; Multi-pass membrane protein {ECO:0000269|PubMed:18559421, ECO:0000269|PubMed:19412172}.	DISEASE: Long QT syndrome 2 (LQT2) [MIM:613688]: A heart disorder characterized by a prolonged QT interval on the ECG and polymorphic ventricular arrhythmias. They cause syncope and sudden death in response to exercise or emotional stress, and can present with a sentinel event of sudden cardiac death in infancy. Deafness is often associated with long QT syndrome type 2. {ECO:0000269|PubMed:100869…	cardiac muscle contraction [GO:0060048]; cellular response to xenobiotic stimulus [GO:0071466]; membrane depolarization during action potential [GO:0086010]; membrane repolarization [GO:0086009]; membrane repolarization during action potential [GO:0086011]; membrane repolarization during cardiac muscle cell action potential [GO:0086013]; membrane repolarization during ventricular cardiac muscle c…	C3HC4-type RING finger domain binding [GO:0055131]; delayed rectifier potassium channel activity [GO:0005251]; identical protein binding [GO:0042802]; inward rectifier potassium channel activity [GO:0005242]; protein homodimerization activity [GO:0042803]; scaffold protein binding [GO:0097110]; transcription cis-regulatory region binding [GO:0000976]; ubiquitin protein ligase binding [GO:0031625]…	cell surface [GO:0009986]; integral component of plasma membrane [GO:0005887]; inward rectifier potassium channel complex [GO:1902937]; perinuclear region of cytoplasm [GO:0048471]; plasma membrane [GO:0005886]; voltage-gated potassium channel complex [GO:0008076]	GO:0000976; GO:0003064; GO:0005242; GO:0005249; GO:0005251; GO:0005886; GO:0005887; GO:0008076; GO:0009986; GO:0031625; GO:0042391; GO:0042802; GO:0042803; GO:0045893; GO:0048471; GO:0055075; GO:0055131; GO:0060048; GO:0060306; GO:0060307; GO:0071466; GO:0071805; GO:0086005; GO:0086008; GO:0086009; GO:0086010; GO:0086011; GO:0086013; GO:0086091; GO:0097110; GO:0097623; GO:0098915; GO:1901379; GO:…	Q12809	1	S255	PPRSAPGQLPSPRAHSLNPDASGSSCSLART	12.2693	12.7877	13.1867	13.3295	12.8484	13.2653	13.7098	13.7706	13.7423	13.7076
SYNPO2_Q9UMS6_S737	1.23315	0.0687745	0.482407	0.829967	1.1761	-1.06221	-0.46393	-1.15503	0.414158	-1.52338	SYNPO2	Synaptopodin-2	Q9UMS6	0.0421323	0.699858	sp|Q9UMS6|SYNP2_HUMAN Synaptopodin-2 OS=Homo sapiens OX=9606 GN=SYNPO2 PE=1 SV=2	FUNCTION: Has an actin-binding and actin-bundling activity. Can induce the formation of F-actin networks in an isoform-specific manner (PubMed:24005909, PubMed:23225103). At the sarcomeric Z lines is proposed to act as adapter protein that links nascent myofibers to the sarcolemma via ZYX and may play a role in early assembly and stabilization of the Z lines. Involved in autophagosome formation. …	SUBCELLULAR LOCATION: Nucleus {ECO:0000250|UniProtKB:Q91YE8}. Cytoplasm {ECO:0000250|UniProtKB:Q91YE8}. Cytoplasm, cytoskeleton {ECO:0000269|PubMed:24005909}. Cytoplasm, myofibril, sarcomere, Z line {ECO:0000269|PubMed:20554076}. Cell junction, focal adhesion {ECO:0000269|PubMed:20554076}. Note=Shuttles between the nucleus and the cytoplasm in a differentiation-dependent and stress-induced fashio…		autophagosome assembly [GO:0000045]; chaperone-mediated autophagy [GO:0061684]; positive regulation of actin filament bundle assembly [GO:0032233]; positive regulation of cell migration [GO:0030335]; regulation of Rho-dependent protein serine/threonine kinase activity [GO:2000298]	14-3-3 protein binding [GO:0071889]; actin binding [GO:0003779]; alpha-actinin binding [GO:0051393]; filamin binding [GO:0031005]; muscle alpha-actinin binding [GO:0051371]; protein-macromolecule adaptor activity [GO:0030674]	actin cytoskeleton [GO:0015629]; cytosol [GO:0005829]; focal adhesion [GO:0005925]; intracellular membrane-bounded organelle [GO:0043231]; nucleoplasm [GO:0005654]; nucleus [GO:0005634]; stress fiber [GO:0001725]; vesicle tethering complex [GO:0099023]; Z disc [GO:0030018]	GO:0000045; GO:0001725; GO:0003779; GO:0005634; GO:0005654; GO:0005829; GO:0005925; GO:0015629; GO:0030018; GO:0030335; GO:0030674; GO:0031005; GO:0032233; GO:0043231; GO:0051371; GO:0051393; GO:0061684; GO:0071889; GO:0099023; GO:2000298	Q9UMS6	0.845383	S737	GTGAGGDSGPEEDYLSLGAEACNFMQSSSAK	12.8406	12.3032	12.4941	12.6545	12.8143	11.7811	12.0573	11.7383	12.4626	11.5682
AKAP13_Q12802_S2398	0.470997	0.352226	1.69067	0.522025	0.622668	-0.81559	-0.840627	-1.84869	0.331955	-0.485632	AKAP13	A-kinase anchor protein 13	Q12802	0.0425948	0.897288	sp|Q12802|AKP13_HUMAN A-kinase anchor protein 13 OS=Homo sapiens OX=9606 GN=AKAP13 PE=1 SV=2	FUNCTION: Scaffold protein that plays an important role in assembling signaling complexes downstream of several types of G protein-coupled receptors. Activates RHOA in response to signaling via G protein-coupled receptors via its function as Rho guanine nucleotide exchange factor (PubMed:11546812, PubMed:15229649, PubMed:23090968, PubMed:25186459, PubMed:24993829). May also activate other Rho fam…	SUBCELLULAR LOCATION: Cytoplasm, cytosol {ECO:0000269|PubMed:11546812, ECO:0000269|PubMed:9891067}. Cytoplasm {ECO:0000269|PubMed:9627117}. Cytoplasm, cell cortex {ECO:0000269|PubMed:11546812}. Nucleus {ECO:0000269|PubMed:9627117}. Membrane {ECO:0000269|PubMed:11696353, ECO:0000269|PubMed:9891067}; Peripheral membrane protein {ECO:0000269|PubMed:11696353, ECO:0000305|PubMed:9891067}. Note=Colocal…		adenylate cyclase-activating adrenergic receptor signaling pathway involved in heart process [GO:0086023]; adrenergic receptor signaling pathway [GO:0071875]; bone development [GO:0060348]; cardiac muscle cell differentiation [GO:0055007]; cell growth involved in cardiac muscle cell development [GO:0061049]; G protein-coupled receptor signaling pathway [GO:0007186]; heart development [GO:0007507]…	cAMP-dependent protein kinase activity [GO:0004691]; guanyl-nucleotide exchange factor activity [GO:0005085]; MAP-kinase scaffold activity [GO:0005078]; metal ion binding [GO:0046872]; molecular adaptor activity [GO:0060090]; protein kinase A binding [GO:0051018]; small GTPase binding [GO:0031267]	cell cortex [GO:0005938]; cytosol [GO:0005829]; membrane [GO:0016020]; nucleus [GO:0005634]; perinuclear region of cytoplasm [GO:0048471]	GO:0004691; GO:0005078; GO:0005085; GO:0005634; GO:0005829; GO:0005938; GO:0007186; GO:0007507; GO:0016020; GO:0031267; GO:0035023; GO:0035025; GO:0043123; GO:0043406; GO:0046872; GO:0048471; GO:0051018; GO:0051056; GO:0051168; GO:0055007; GO:0060090; GO:0060297; GO:0060348; GO:0061049; GO:0071875; GO:0086023	Q12802	0.960516	S2398	FRDMAECSTPLPEDCSPTHSPRVLFRSNTEE	12.6171	12.5443	13.3649	12.6484	12.7101	11.8282	11.8129	11.1948	12.5319	12.0306
TNNI1_P19237_S58	-0.892212	-1.00965	-1.89886	-0.0858968	0.226905	0.377669	0.831723	0.660842	1.46387	0.325615	TNNI1	Troponin I, slow skeletal muscle	P19237	0.0426881	-0.890052	sp|P19237|TNNI1_HUMAN Troponin I, slow skeletal muscle OS=Homo sapiens OX=9606 GN=TNNI1 PE=1 SV=3	FUNCTION: Troponin I is the inhibitory subunit of troponin, the thin filament regulatory complex which confers calcium-sensitivity to striated muscle actomyosin ATPase activity.			cardiac muscle contraction [GO:0060048]; muscle contraction [GO:0006936]; regulation of striated muscle contraction [GO:0006942]; skeletal muscle contraction [GO:0003009]; transition between fast and slow fiber [GO:0014883]; ventricular cardiac muscle tissue morphogenesis [GO:0055010]	actin binding [GO:0003779]; metal ion binding [GO:0046872]	cytosol [GO:0005829]; troponin complex [GO:0005861]	GO:0003009; GO:0003779; GO:0005829; GO:0005861; GO:0006936; GO:0006942; GO:0014883; GO:0046872; GO:0055010; GO:0060048	P19237	0.984796	S58	RYLAERIPTLQTRGLSLSALQDLCRELHAKV	8.8028	8.73139	8.19075	9.29304	9.48323	9.57489	9.85096	9.74706	10.2353	9.54324
SYNPO2_Q9UMS6_S226	0.509235	0.631965	1.4569	0.544744	0.688019	-1.67079	-1.59252	-0.095776	-0.220099	-0.251675	SYNPO2	Synaptopodin-2	Q9UMS6	0.0440901	0.639953	sp|Q9UMS6|SYNP2_HUMAN Synaptopodin-2 OS=Homo sapiens OX=9606 GN=SYNPO2 PE=1 SV=2	FUNCTION: Has an actin-binding and actin-bundling activity. Can induce the formation of F-actin networks in an isoform-specific manner (PubMed:24005909, PubMed:23225103). At the sarcomeric Z lines is proposed to act as adapter protein that links nascent myofibers to the sarcolemma via ZYX and may play a role in early assembly and stabilization of the Z lines. Involved in autophagosome formation. …	SUBCELLULAR LOCATION: Nucleus {ECO:0000250|UniProtKB:Q91YE8}. Cytoplasm {ECO:0000250|UniProtKB:Q91YE8}. Cytoplasm, cytoskeleton {ECO:0000269|PubMed:24005909}. Cytoplasm, myofibril, sarcomere, Z line {ECO:0000269|PubMed:20554076}. Cell junction, focal adhesion {ECO:0000269|PubMed:20554076}. Note=Shuttles between the nucleus and the cytoplasm in a differentiation-dependent and stress-induced fashio…		autophagosome assembly [GO:0000045]; chaperone-mediated autophagy [GO:0061684]; positive regulation of actin filament bundle assembly [GO:0032233]; positive regulation of cell migration [GO:0030335]; regulation of Rho-dependent protein serine/threonine kinase activity [GO:2000298]	14-3-3 protein binding [GO:0071889]; actin binding [GO:0003779]; alpha-actinin binding [GO:0051393]; filamin binding [GO:0031005]; muscle alpha-actinin binding [GO:0051371]; protein-macromolecule adaptor activity [GO:0030674]	actin cytoskeleton [GO:0015629]; cytosol [GO:0005829]; focal adhesion [GO:0005925]; intracellular membrane-bounded organelle [GO:0043231]; nucleoplasm [GO:0005654]; nucleus [GO:0005634]; stress fiber [GO:0001725]; vesicle tethering complex [GO:0099023]; Z disc [GO:0030018]	GO:0000045; GO:0001725; GO:0003779; GO:0005634; GO:0005654; GO:0005829; GO:0005925; GO:0015629; GO:0030018; GO:0030335; GO:0030674; GO:0031005; GO:0032233; GO:0043231; GO:0051371; GO:0051393; GO:0061684; GO:0071889; GO:0099023; GO:2000298	Q9UMS6	0.984082	S226	ASGPLVALPGAEKSKSPDPDPNLSHDRIVHI	15.9097	15.9609	16.3055	15.9245	15.9843	14.9992	15.0319	15.657	15.6051	15.5919
CACNB2_Q08289_S514	-1.41937	-0.899743	-1.32698	0.614053	-0.678251	0.483403	0.272167	0.800003	1.47025	0.684471	CACNB2	Voltage-dependent L-type calcium channel subunit beta-2	Q08289	0.0459759	-0.733414	sp|Q08289|CACB2_HUMAN Voltage-dependent L-type calcium channel subunit beta-2 OS=Homo sapiens OX=9606 GN=CACNB2 PE=1 SV=3	FUNCTION: The beta subunit of voltage-dependent calcium channels contributes to the function of the calcium channel by increasing peak calcium current, shifting the voltage dependencies of activation and inactivation, modulating G protein inhibition and controlling the alpha-1 subunit membrane targeting.	SUBCELLULAR LOCATION: Cell membrane, sarcolemma {ECO:0000250}; Peripheral membrane protein {ECO:0000250}; Cytoplasmic side {ECO:0000250}.	DISEASE: Brugada syndrome 4 (BRGDA4) [MIM:611876]: A heart disease characterized by the association of Brugada syndrome with shortened QT intervals. Brugada syndrome is a tachyarrhythmia characterized by right bundle branch block and ST segment elevation on an electrocardiogram (ECG). It can cause the ventricles to beat so fast that the blood is prevented from circulating efficiently in the body.…	calcium ion import [GO:0070509]; chemical synaptic transmission [GO:0007268]; membrane depolarization during atrial cardiac muscle cell action potential [GO:0098912]; membrane depolarization during AV node cell action potential [GO:0086045]; neuromuscular junction development [GO:0007528]; positive regulation of calcium ion transmembrane transport via high voltage-gated calcium channel [GO:190487…	actin filament binding [GO:0051015]; calcium channel activity [GO:0005262]; voltage-gated calcium channel activity [GO:0005245]; voltage-gated calcium channel activity involved in positive regulation of presynaptic cytosolic calcium levels [GO:0099635]	integral component of plasma membrane [GO:0005887]; L-type voltage-gated calcium channel complex [GO:1990454]; photoreceptor ribbon synapse [GO:0098684]; plasma membrane [GO:0005886]; presynapse [GO:0098793]; voltage-gated calcium channel complex [GO:0005891]	GO:0005245; GO:0005262; GO:0005886; GO:0005887; GO:0005891; GO:0007268; GO:0007528; GO:0007601; GO:0051015; GO:0051928; GO:0070509; GO:0072659; GO:0086045; GO:0086091; GO:0098684; GO:0098793; GO:0098912; GO:0099635; GO:1901385; GO:1901843; GO:1904879; GO:1990454	Q08289	0.903205	S514	QGDQRTDRSAPIRSASQAEEEPSVEPVKKSQ	13.3701	13.6269	13.4158	14.375	13.7364	14.3104	14.206	14.4669	14.7981	14.4098
PPP1R3D_O95685_S46	0.79726	0.877401	0.543655	0.645859	0.711036	-0.171424	-1.22917	-0.0237314	-2	0.0475714	PPP1R3D	Protein phosphatase 1 regulatory subunit 3D	O95685	0.0491581	0.915633	sp|O95685|PPR3D_HUMAN Protein phosphatase 1 regulatory subunit 3D OS=Homo sapiens OX=9606 GN=PPP1R3D PE=1 SV=1	FUNCTION: Seems to act as a glycogen-targeting subunit for PP1. PP1 is essential for cell division, and participates in the regulation of glycogen metabolism, muscle contractility and protein synthesis.			glycogen metabolic process [GO:0005977]; regulation of glycogen biosynthetic process [GO:0005979]; regulation of glycogen catabolic process [GO:0005981]	glycogen binding [GO:2001069]; protein phosphatase 1 binding [GO:0008157]; protein serine/threonine phosphatase activity [GO:0004722]	glycogen granule [GO:0042587]; intracellular membrane-bounded organelle [GO:0043231]; protein phosphatase type 1 complex [GO:0000164]	GO:0000164; GO:0004722; GO:0005977; GO:0005979; GO:0005981; GO:0008157; GO:0042587; GO:0043231; GO:2001069	O95685	1	S46	DGGVALEPRACRPPGSPGRAPPPTPAPSGCD	15.6594	15.7107	15.497	15.5625	15.6042	15.0392	14.3619	15.1337	13.7413	15.1794
TTN_Q8WZ42_S21118	1.09074	1.68777	0.0291498	-0.639271	1.33542	-0.786324	-0.950251	-0.720157	-0.222923	-0.824158	TTN	Titin	Q8WZ42	0.0494726	1.21439	sp|Q8WZ42|TITIN_HUMAN Titin OS=Homo sapiens OX=9606 GN=TTN PE=1 SV=4	FUNCTION: Key component in the assembly and functioning of vertebrate striated muscles. By providing connections at the level of individual microfilaments, it contributes to the fine balance of forces between the two halves of the sarcomere. The size and extensibility of the cross-links are the main determinants of sarcomere extensibility properties of muscle. In non-muscle cells, seems to play a…	SUBCELLULAR LOCATION: Cytoplasm {ECO:0000305|PubMed:16410549}. Nucleus {ECO:0000269|PubMed:16410549}.	DISEASE: Myopathy, myofibrillar, 9, with early respiratory failure (MFM9) [MIM:603689]: An autosomal dominant myopathy characterized by adulthood onset of weakness in proximal, distal, axial and respiratory muscles. Pelvic girdle weakness, foot drop and neck weakness are the main symptoms at onset, but ultimately the weakness usually involves the proximal compartment of both upper and lower limbs…	cardiac muscle cell development [GO:0055013]; cardiac muscle contraction [GO:0060048]; cardiac muscle hypertrophy [GO:0003300]; cardiac muscle tissue morphogenesis [GO:0055008]; cardiac myofibril assembly [GO:0055003]; detection of muscle stretch [GO:0035995]; mitotic chromosome condensation [GO:0007076]; muscle contraction [GO:0006936]; positive regulation of gene expression [GO:0010628]; positi…	actin filament binding [GO:0051015]; actinin binding [GO:0042805]; ATP binding [GO:0005524]; calcium ion binding [GO:0005509]; calmodulin binding [GO:0005516]; enzyme binding [GO:0019899]; identical protein binding [GO:0042802]; muscle alpha-actinin binding [GO:0051371]; protease binding [GO:0002020]; protein kinase binding [GO:0019901]; protein self-association [GO:0043621]; protein serine kinas…	condensed nuclear chromosome [GO:0000794]; cytosol [GO:0005829]; extracellular exosome [GO:0070062]; extracellular region [GO:0005576]; I band [GO:0031674]; M band [GO:0031430]; striated muscle thin filament [GO:0005865]; titin-telethonin complex [GO:1990733]; Z disc [GO:0030018]	GO:0000794; GO:0002020; GO:0003300; GO:0004674; GO:0004713; GO:0005509; GO:0005516; GO:0005524; GO:0005576; GO:0005829; GO:0005865; GO:0006936; GO:0006941; GO:0007076; GO:0008307; GO:0010628; GO:0010737; GO:0019899; GO:0019901; GO:0030018; GO:0030240; GO:0030241; GO:0031430; GO:0031433; GO:0031674; GO:0035995; GO:0042802; GO:0042805; GO:0043621; GO:0045214; GO:0045859; GO:0048769; GO:0050714; GO:…	Q8WZ42	0.979332	S21118	PDAPPPPNIVDVRHDSVSLTWTDPKKTGGSP	15.7734	16.2907	14.8535	14.2744	15.9854	14.147	14.0049	14.2043	14.6351	14.1142
TTN_Q8WZ42_S813	1.29682	0.923797	1.88081	-0.36061	-0.0430727	-0.621603	-0.834111	-0.601113	-0.874163	-0.766749	TTN	Titin	Q8WZ42	0.0508867	0.676932	sp|Q8WZ42|TITIN_HUMAN Titin OS=Homo sapiens OX=9606 GN=TTN PE=1 SV=4	FUNCTION: Key component in the assembly and functioning of vertebrate striated muscles. By providing connections at the level of individual microfilaments, it contributes to the fine balance of forces between the two halves of the sarcomere. The size and extensibility of the cross-links are the main determinants of sarcomere extensibility properties of muscle. In non-muscle cells, seems to play a…	SUBCELLULAR LOCATION: Cytoplasm {ECO:0000305|PubMed:16410549}. Nucleus {ECO:0000269|PubMed:16410549}.	DISEASE: Myopathy, myofibrillar, 9, with early respiratory failure (MFM9) [MIM:603689]: An autosomal dominant myopathy characterized by adulthood onset of weakness in proximal, distal, axial and respiratory muscles. Pelvic girdle weakness, foot drop and neck weakness are the main symptoms at onset, but ultimately the weakness usually involves the proximal compartment of both upper and lower limbs…	cardiac muscle cell development [GO:0055013]; cardiac muscle contraction [GO:0060048]; cardiac muscle hypertrophy [GO:0003300]; cardiac muscle tissue morphogenesis [GO:0055008]; cardiac myofibril assembly [GO:0055003]; detection of muscle stretch [GO:0035995]; mitotic chromosome condensation [GO:0007076]; muscle contraction [GO:0006936]; positive regulation of gene expression [GO:0010628]; positi…	actin filament binding [GO:0051015]; actinin binding [GO:0042805]; ATP binding [GO:0005524]; calcium ion binding [GO:0005509]; calmodulin binding [GO:0005516]; enzyme binding [GO:0019899]; identical protein binding [GO:0042802]; muscle alpha-actinin binding [GO:0051371]; protease binding [GO:0002020]; protein kinase binding [GO:0019901]; protein self-association [GO:0043621]; protein serine kinas…	condensed nuclear chromosome [GO:0000794]; cytosol [GO:0005829]; extracellular exosome [GO:0070062]; extracellular region [GO:0005576]; I band [GO:0031674]; M band [GO:0031430]; striated muscle thin filament [GO:0005865]; titin-telethonin complex [GO:1990733]; Z disc [GO:0030018]	GO:0000794; GO:0002020; GO:0003300; GO:0004674; GO:0004713; GO:0005509; GO:0005516; GO:0005524; GO:0005576; GO:0005829; GO:0005865; GO:0006936; GO:0006941; GO:0007076; GO:0008307; GO:0010628; GO:0010737; GO:0019899; GO:0019901; GO:0030018; GO:0030240; GO:0030241; GO:0031430; GO:0031433; GO:0031674; GO:0035995; GO:0042802; GO:0042805; GO:0043621; GO:0045214; GO:0045859; GO:0048769; GO:0050714; GO:…	Q8WZ42	0.863992	S813	TTERLVHVDKRPRTASPHFTVSKISVPKTEH	14.2237	14.0529	14.4909	13.4651	13.6104	13.3457	13.2484	13.355	13.2301	13.2792
TTN_Q8WZ42_S33309	0.95598	1.02491	1.73078	0.26047	-0.166452	-1.2828	-0.60775	-1.2937	-0.133512	-0.487939	TTN	Titin	Q8WZ42	0.0508867	0.587777	sp|Q8WZ42|TITIN_HUMAN Titin OS=Homo sapiens OX=9606 GN=TTN PE=1 SV=4	FUNCTION: Key component in the assembly and functioning of vertebrate striated muscles. By providing connections at the level of individual microfilaments, it contributes to the fine balance of forces between the two halves of the sarcomere. The size and extensibility of the cross-links are the main determinants of sarcomere extensibility properties of muscle. In non-muscle cells, seems to play a…	SUBCELLULAR LOCATION: Cytoplasm {ECO:0000305|PubMed:16410549}. Nucleus {ECO:0000269|PubMed:16410549}.	DISEASE: Myopathy, myofibrillar, 9, with early respiratory failure (MFM9) [MIM:603689]: An autosomal dominant myopathy characterized by adulthood onset of weakness in proximal, distal, axial and respiratory muscles. Pelvic girdle weakness, foot drop and neck weakness are the main symptoms at onset, but ultimately the weakness usually involves the proximal compartment of both upper and lower limbs…	cardiac muscle cell development [GO:0055013]; cardiac muscle contraction [GO:0060048]; cardiac muscle hypertrophy [GO:0003300]; cardiac muscle tissue morphogenesis [GO:0055008]; cardiac myofibril assembly [GO:0055003]; detection of muscle stretch [GO:0035995]; mitotic chromosome condensation [GO:0007076]; muscle contraction [GO:0006936]; positive regulation of gene expression [GO:0010628]; positi…	actin filament binding [GO:0051015]; actinin binding [GO:0042805]; ATP binding [GO:0005524]; calcium ion binding [GO:0005509]; calmodulin binding [GO:0005516]; enzyme binding [GO:0019899]; identical protein binding [GO:0042802]; muscle alpha-actinin binding [GO:0051371]; protease binding [GO:0002020]; protein kinase binding [GO:0019901]; protein self-association [GO:0043621]; protein serine kinas…	condensed nuclear chromosome [GO:0000794]; cytosol [GO:0005829]; extracellular exosome [GO:0070062]; extracellular region [GO:0005576]; I band [GO:0031674]; M band [GO:0031430]; striated muscle thin filament [GO:0005865]; titin-telethonin complex [GO:1990733]; Z disc [GO:0030018]	GO:0000794; GO:0002020; GO:0003300; GO:0004674; GO:0004713; GO:0005509; GO:0005516; GO:0005524; GO:0005576; GO:0005829; GO:0005865; GO:0006936; GO:0006941; GO:0007076; GO:0008307; GO:0010628; GO:0010737; GO:0019899; GO:0019901; GO:0030018; GO:0030240; GO:0030241; GO:0031430; GO:0031433; GO:0031674; GO:0035995; GO:0042802; GO:0042805; GO:0043621; GO:0045214; GO:0045859; GO:0048769; GO:0050714; GO:…	Q8WZ42	0.999896	S33309	PFTLDHAPRITLRMRSHRVPCGQNTRFILNV	10.1982	10.2249	10.4974	9.9297	9.76485	9.33382	9.59446	9.32961	9.77757	9.64072
TTN_Q8WZ42_S33188	-1.41528	-0.592326	0.463532	-0.198131	-1.67418	0.816876	1.36986	1.00179	0.0250869	0.202784	TTN	Titin	Q8WZ42	0.0544669	-1.59707	sp|Q8WZ42|TITIN_HUMAN Titin OS=Homo sapiens OX=9606 GN=TTN PE=1 SV=4	FUNCTION: Key component in the assembly and functioning of vertebrate striated muscles. By providing connections at the level of individual microfilaments, it contributes to the fine balance of forces between the two halves of the sarcomere. The size and extensibility of the cross-links are the main determinants of sarcomere extensibility properties of muscle. In non-muscle cells, seems to play a…	SUBCELLULAR LOCATION: Cytoplasm {ECO:0000305|PubMed:16410549}. Nucleus {ECO:0000269|PubMed:16410549}.	DISEASE: Myopathy, myofibrillar, 9, with early respiratory failure (MFM9) [MIM:603689]: An autosomal dominant myopathy characterized by adulthood onset of weakness in proximal, distal, axial and respiratory muscles. Pelvic girdle weakness, foot drop and neck weakness are the main symptoms at onset, but ultimately the weakness usually involves the proximal compartment of both upper and lower limbs…	cardiac muscle cell development [GO:0055013]; cardiac muscle contraction [GO:0060048]; cardiac muscle hypertrophy [GO:0003300]; cardiac muscle tissue morphogenesis [GO:0055008]; cardiac myofibril assembly [GO:0055003]; detection of muscle stretch [GO:0035995]; mitotic chromosome condensation [GO:0007076]; muscle contraction [GO:0006936]; positive regulation of gene expression [GO:0010628]; positi…	actin filament binding [GO:0051015]; actinin binding [GO:0042805]; ATP binding [GO:0005524]; calcium ion binding [GO:0005509]; calmodulin binding [GO:0005516]; enzyme binding [GO:0019899]; identical protein binding [GO:0042802]; muscle alpha-actinin binding [GO:0051371]; protease binding [GO:0002020]; protein kinase binding [GO:0019901]; protein self-association [GO:0043621]; protein serine kinas…	condensed nuclear chromosome [GO:0000794]; cytosol [GO:0005829]; extracellular exosome [GO:0070062]; extracellular region [GO:0005576]; I band [GO:0031674]; M band [GO:0031430]; striated muscle thin filament [GO:0005865]; titin-telethonin complex [GO:1990733]; Z disc [GO:0030018]	GO:0000794; GO:0002020; GO:0003300; GO:0004674; GO:0004713; GO:0005509; GO:0005516; GO:0005524; GO:0005576; GO:0005829; GO:0005865; GO:0006936; GO:0006941; GO:0007076; GO:0008307; GO:0010628; GO:0010737; GO:0019899; GO:0019901; GO:0030018; GO:0030240; GO:0030241; GO:0031430; GO:0031433; GO:0031674; GO:0035995; GO:0042802; GO:0042805; GO:0043621; GO:0045214; GO:0045859; GO:0048769; GO:0050714; GO:…	Q8WZ42	0.928555	S33188	EIEEEYEISKHAQRESSSSASRLLRRRRSLS	8.9048	9.86657	11.1005	10.3273	8.60223	11.5135	12.1597	11.7296	10.5881	10.7958
MYLK3_Q32MK0_S152	-1.0697	-1.2695	-1.04945	0.727841	-0.789301	0.54831	0.427586	1.35684	-0.162861	1.28024	MYLK3	Myosin light chain kinase 3	Q32MK0	0.0544669	-1.20785	sp|Q32MK0|MYLK3_HUMAN Myosin light chain kinase 3 OS=Homo sapiens OX=9606 GN=MYLK3 PE=1 SV=3	FUNCTION: Kinase that phosphorylates MYL2 in vitro. Promotes sarcomere formation in cardiomyocytes and increases cardiomyocyte contractility (By similarity). {ECO:0000250}.	SUBCELLULAR LOCATION: Cytoplasm {ECO:0000250}.		cardiac myofibril assembly [GO:0055003]; cellular response to interleukin-1 [GO:0071347]; positive regulation of sarcomere organization [GO:0060298]; protein phosphorylation [GO:0006468]; regulation of vascular permeability involved in acute inflammatory response [GO:0002528]; sarcomere organization [GO:0045214]; sarcomerogenesis [GO:0048769]	ATP binding [GO:0005524]; calmodulin-dependent protein kinase activity [GO:0004683]; myosin light chain kinase activity [GO:0004687]	actin cytoskeleton [GO:0015629]; cytoplasm [GO:0005737]; cytosol [GO:0005829]	GO:0002528; GO:0004683; GO:0004687; GO:0005524; GO:0005737; GO:0005829; GO:0006468; GO:0015629; GO:0045214; GO:0048769; GO:0055003; GO:0060298; GO:0071347	Q32MK0	0.999979	S152	VADFLMQGRVPWRRGSPGDSPEENKERVEEE	13.7839	13.6091	13.8017	15.3572	14.0293	15.2001	15.0944	15.9077	14.5776	15.8407
MYLK3_Q32MK0_S355	-1.27532	-1.30206	-0.183511	0.454754	-1.12319	0.904269	1.58183	0.663786	-0.29423	0.573673	MYLK3	Myosin light chain kinase 3	Q32MK0	0.0568827	-1.2219	sp|Q32MK0|MYLK3_HUMAN Myosin light chain kinase 3 OS=Homo sapiens OX=9606 GN=MYLK3 PE=1 SV=3	FUNCTION: Kinase that phosphorylates MYL2 in vitro. Promotes sarcomere formation in cardiomyocytes and increases cardiomyocyte contractility (By similarity). {ECO:0000250}.	SUBCELLULAR LOCATION: Cytoplasm {ECO:0000250}.		cardiac myofibril assembly [GO:0055003]; cellular response to interleukin-1 [GO:0071347]; positive regulation of sarcomere organization [GO:0060298]; protein phosphorylation [GO:0006468]; regulation of vascular permeability involved in acute inflammatory response [GO:0002528]; sarcomere organization [GO:0045214]; sarcomerogenesis [GO:0048769]	ATP binding [GO:0005524]; calmodulin-dependent protein kinase activity [GO:0004683]; myosin light chain kinase activity [GO:0004687]	actin cytoskeleton [GO:0015629]; cytoplasm [GO:0005737]; cytosol [GO:0005829]	GO:0002528; GO:0004683; GO:0004687; GO:0005524; GO:0005737; GO:0005829; GO:0006468; GO:0015629; GO:0045214; GO:0048769; GO:0055003; GO:0060298; GO:0071347	Q32MK0	0.701802	S355	QEMDTPGEMLMTGRGSLGPTLTTEAPAAAQP	11.9006	11.8768	12.8732	13.4418	12.0362	13.8422	14.4457	13.628	12.7746	13.5477
TTN_Q8WZ42_S6248	1.21576	0.389134	0.862603	-0.363162	1.33218	-0.648782	-0.389113	-1.646	0.383614	-1.13623	TTN	Titin	Q8WZ42	0.0574224	1.14416	sp|Q8WZ42|TITIN_HUMAN Titin OS=Homo sapiens OX=9606 GN=TTN PE=1 SV=4	FUNCTION: Key component in the assembly and functioning of vertebrate striated muscles. By providing connections at the level of individual microfilaments, it contributes to the fine balance of forces between the two halves of the sarcomere. The size and extensibility of the cross-links are the main determinants of sarcomere extensibility properties of muscle. In non-muscle cells, seems to play a…	SUBCELLULAR LOCATION: Cytoplasm {ECO:0000305|PubMed:16410549}. Nucleus {ECO:0000269|PubMed:16410549}.	DISEASE: Myopathy, myofibrillar, 9, with early respiratory failure (MFM9) [MIM:603689]: An autosomal dominant myopathy characterized by adulthood onset of weakness in proximal, distal, axial and respiratory muscles. Pelvic girdle weakness, foot drop and neck weakness are the main symptoms at onset, but ultimately the weakness usually involves the proximal compartment of both upper and lower limbs…	cardiac muscle cell development [GO:0055013]; cardiac muscle contraction [GO:0060048]; cardiac muscle hypertrophy [GO:0003300]; cardiac muscle tissue morphogenesis [GO:0055008]; cardiac myofibril assembly [GO:0055003]; detection of muscle stretch [GO:0035995]; mitotic chromosome condensation [GO:0007076]; muscle contraction [GO:0006936]; positive regulation of gene expression [GO:0010628]; positi…	actin filament binding [GO:0051015]; actinin binding [GO:0042805]; ATP binding [GO:0005524]; calcium ion binding [GO:0005509]; calmodulin binding [GO:0005516]; enzyme binding [GO:0019899]; identical protein binding [GO:0042802]; muscle alpha-actinin binding [GO:0051371]; protease binding [GO:0002020]; protein kinase binding [GO:0019901]; protein self-association [GO:0043621]; protein serine kinas…	condensed nuclear chromosome [GO:0000794]; cytosol [GO:0005829]; extracellular exosome [GO:0070062]; extracellular region [GO:0005576]; I band [GO:0031674]; M band [GO:0031430]; striated muscle thin filament [GO:0005865]; titin-telethonin complex [GO:1990733]; Z disc [GO:0030018]	GO:0000794; GO:0002020; GO:0003300; GO:0004674; GO:0004713; GO:0005509; GO:0005516; GO:0005524; GO:0005576; GO:0005829; GO:0005865; GO:0006936; GO:0006941; GO:0007076; GO:0008307; GO:0010628; GO:0010737; GO:0019899; GO:0019901; GO:0030018; GO:0030240; GO:0030241; GO:0031430; GO:0031433; GO:0031674; GO:0035995; GO:0042802; GO:0042805; GO:0043621; GO:0045214; GO:0045859; GO:0048769; GO:0050714; GO:…	Q8WZ42	0.992137	S6248	NYTCKVSNVAGDDACSGILTVKEPPSFLVKP	11.0979	10.4099	10.8039	9.78367	11.1948	9.54594	9.76207	8.71589	10.4053	9.14021
MYLK3_Q32MK0_T359	-1.4119	-1.02658	-0.171794	0.276819	-1.04994	0.899539	1.45722	0.869672	-0.643608	0.800572	MYLK3	Myosin light chain kinase 3	Q32MK0	0.0583448	-1.60948	sp|Q32MK0|MYLK3_HUMAN Myosin light chain kinase 3 OS=Homo sapiens OX=9606 GN=MYLK3 PE=1 SV=3	FUNCTION: Kinase that phosphorylates MYL2 in vitro. Promotes sarcomere formation in cardiomyocytes and increases cardiomyocyte contractility (By similarity). {ECO:0000250}.	SUBCELLULAR LOCATION: Cytoplasm {ECO:0000250}.		cardiac myofibril assembly [GO:0055003]; cellular response to interleukin-1 [GO:0071347]; positive regulation of sarcomere organization [GO:0060298]; protein phosphorylation [GO:0006468]; regulation of vascular permeability involved in acute inflammatory response [GO:0002528]; sarcomere organization [GO:0045214]; sarcomerogenesis [GO:0048769]	ATP binding [GO:0005524]; calmodulin-dependent protein kinase activity [GO:0004683]; myosin light chain kinase activity [GO:0004687]	actin cytoskeleton [GO:0015629]; cytoplasm [GO:0005737]; cytosol [GO:0005829]	GO:0002528; GO:0004683; GO:0004687; GO:0005524; GO:0005737; GO:0005829; GO:0006468; GO:0015629; GO:0045214; GO:0048769; GO:0055003; GO:0060298; GO:0071347	Q32MK0	0.736156	T359	TPGEMLMTGRGSLGPTLTTEAPAAAQPGKQG	11.4779	11.9361	12.9527	13.4862	11.9083	14.2268	14.89	14.1912	12.3916	14.1091
TTN_Q8WZ42_T300.1	0.390588	0.653999	1.81499	-0.258643	1.16435	-0.55941	-1.37575	-0.905758	-0.815514	-0.108843	TTN	Titin	Q8WZ42	0.0593443	0.550383	sp|Q8WZ42|TITIN_HUMAN Titin OS=Homo sapiens OX=9606 GN=TTN PE=1 SV=4	FUNCTION: Key component in the assembly and functioning of vertebrate striated muscles. By providing connections at the level of individual microfilaments, it contributes to the fine balance of forces between the two halves of the sarcomere. The size and extensibility of the cross-links are the main determinants of sarcomere extensibility properties of muscle. In non-muscle cells, seems to play a…	SUBCELLULAR LOCATION: Cytoplasm {ECO:0000305|PubMed:16410549}. Nucleus {ECO:0000269|PubMed:16410549}.	DISEASE: Myopathy, myofibrillar, 9, with early respiratory failure (MFM9) [MIM:603689]: An autosomal dominant myopathy characterized by adulthood onset of weakness in proximal, distal, axial and respiratory muscles. Pelvic girdle weakness, foot drop and neck weakness are the main symptoms at onset, but ultimately the weakness usually involves the proximal compartment of both upper and lower limbs…	cardiac muscle cell development [GO:0055013]; cardiac muscle contraction [GO:0060048]; cardiac muscle hypertrophy [GO:0003300]; cardiac muscle tissue morphogenesis [GO:0055008]; cardiac myofibril assembly [GO:0055003]; detection of muscle stretch [GO:0035995]; mitotic chromosome condensation [GO:0007076]; muscle contraction [GO:0006936]; positive regulation of gene expression [GO:0010628]; positi…	actin filament binding [GO:0051015]; actinin binding [GO:0042805]; ATP binding [GO:0005524]; calcium ion binding [GO:0005509]; calmodulin binding [GO:0005516]; enzyme binding [GO:0019899]; identical protein binding [GO:0042802]; muscle alpha-actinin binding [GO:0051371]; protease binding [GO:0002020]; protein kinase binding [GO:0019901]; protein self-association [GO:0043621]; protein serine kinas…	condensed nuclear chromosome [GO:0000794]; cytosol [GO:0005829]; extracellular exosome [GO:0070062]; extracellular region [GO:0005576]; I band [GO:0031674]; M band [GO:0031430]; striated muscle thin filament [GO:0005865]; titin-telethonin complex [GO:1990733]; Z disc [GO:0030018]	GO:0000794; GO:0002020; GO:0003300; GO:0004674; GO:0004713; GO:0005509; GO:0005516; GO:0005524; GO:0005576; GO:0005829; GO:0005865; GO:0006936; GO:0006941; GO:0007076; GO:0008307; GO:0010628; GO:0010737; GO:0019899; GO:0019901; GO:0030018; GO:0030240; GO:0030241; GO:0031430; GO:0031433; GO:0031674; GO:0035995; GO:0042802; GO:0042805; GO:0043621; GO:0045214; GO:0045859; GO:0048769; GO:0050714; GO:…	Q8WZ42	0.99888	T300	PIRHSPSPVRHVRAPTPSPVRSVSPAARIST	16.38	16.4762	16.9005	16.1427	16.6627	16.0328	15.7345	15.9062	15.9392	16.1975
TTN_Q8WZ42_S308.1	0.159647	0.360422	1.77713	0.137761	1.2394	-0.723762	-1.58939	-0.379106	-0.968195	-0.013912	TTN	Titin	Q8WZ42	0.0614725	0.590456	sp|Q8WZ42|TITIN_HUMAN Titin OS=Homo sapiens OX=9606 GN=TTN PE=1 SV=4	FUNCTION: Key component in the assembly and functioning of vertebrate striated muscles. By providing connections at the level of individual microfilaments, it contributes to the fine balance of forces between the two halves of the sarcomere. The size and extensibility of the cross-links are the main determinants of sarcomere extensibility properties of muscle. In non-muscle cells, seems to play a…	SUBCELLULAR LOCATION: Cytoplasm {ECO:0000305|PubMed:16410549}. Nucleus {ECO:0000269|PubMed:16410549}.	DISEASE: Myopathy, myofibrillar, 9, with early respiratory failure (MFM9) [MIM:603689]: An autosomal dominant myopathy characterized by adulthood onset of weakness in proximal, distal, axial and respiratory muscles. Pelvic girdle weakness, foot drop and neck weakness are the main symptoms at onset, but ultimately the weakness usually involves the proximal compartment of both upper and lower limbs…	cardiac muscle cell development [GO:0055013]; cardiac muscle contraction [GO:0060048]; cardiac muscle hypertrophy [GO:0003300]; cardiac muscle tissue morphogenesis [GO:0055008]; cardiac myofibril assembly [GO:0055003]; detection of muscle stretch [GO:0035995]; mitotic chromosome condensation [GO:0007076]; muscle contraction [GO:0006936]; positive regulation of gene expression [GO:0010628]; positi…	actin filament binding [GO:0051015]; actinin binding [GO:0042805]; ATP binding [GO:0005524]; calcium ion binding [GO:0005509]; calmodulin binding [GO:0005516]; enzyme binding [GO:0019899]; identical protein binding [GO:0042802]; muscle alpha-actinin binding [GO:0051371]; protease binding [GO:0002020]; protein kinase binding [GO:0019901]; protein self-association [GO:0043621]; protein serine kinas…	condensed nuclear chromosome [GO:0000794]; cytosol [GO:0005829]; extracellular exosome [GO:0070062]; extracellular region [GO:0005576]; I band [GO:0031674]; M band [GO:0031430]; striated muscle thin filament [GO:0005865]; titin-telethonin complex [GO:1990733]; Z disc [GO:0030018]	GO:0000794; GO:0002020; GO:0003300; GO:0004674; GO:0004713; GO:0005509; GO:0005516; GO:0005524; GO:0005576; GO:0005829; GO:0005865; GO:0006936; GO:0006941; GO:0007076; GO:0008307; GO:0010628; GO:0010737; GO:0019899; GO:0019901; GO:0030018; GO:0030240; GO:0030241; GO:0031430; GO:0031433; GO:0031674; GO:0035995; GO:0042802; GO:0042805; GO:0043621; GO:0045214; GO:0045859; GO:0048769; GO:0050714; GO:…	Q8WZ42	1	S308	VRHVRAPTPSPVRSVSPAARISTSPIRSVRS	16.5237	16.6044	17.1735	16.5149	16.9575	16.1688	15.8211	16.3073	16.0706	16.454
TTN_Q8WZ42_S33942	1.29071	0.380971	-0.156224	1.4878	0.670258	0.19029	-1.3708	-0.393645	-1.38716	-0.71221	TTN	Titin	Q8WZ42	0.0633554	0.580592	sp|Q8WZ42|TITIN_HUMAN Titin OS=Homo sapiens OX=9606 GN=TTN PE=1 SV=4	FUNCTION: Key component in the assembly and functioning of vertebrate striated muscles. By providing connections at the level of individual microfilaments, it contributes to the fine balance of forces between the two halves of the sarcomere. The size and extensibility of the cross-links are the main determinants of sarcomere extensibility properties of muscle. In non-muscle cells, seems to play a…	SUBCELLULAR LOCATION: Cytoplasm {ECO:0000305|PubMed:16410549}. Nucleus {ECO:0000269|PubMed:16410549}.	DISEASE: Myopathy, myofibrillar, 9, with early respiratory failure (MFM9) [MIM:603689]: An autosomal dominant myopathy characterized by adulthood onset of weakness in proximal, distal, axial and respiratory muscles. Pelvic girdle weakness, foot drop and neck weakness are the main symptoms at onset, but ultimately the weakness usually involves the proximal compartment of both upper and lower limbs…	cardiac muscle cell development [GO:0055013]; cardiac muscle contraction [GO:0060048]; cardiac muscle hypertrophy [GO:0003300]; cardiac muscle tissue morphogenesis [GO:0055008]; cardiac myofibril assembly [GO:0055003]; detection of muscle stretch [GO:0035995]; mitotic chromosome condensation [GO:0007076]; muscle contraction [GO:0006936]; positive regulation of gene expression [GO:0010628]; positi…	actin filament binding [GO:0051015]; actinin binding [GO:0042805]; ATP binding [GO:0005524]; calcium ion binding [GO:0005509]; calmodulin binding [GO:0005516]; enzyme binding [GO:0019899]; identical protein binding [GO:0042802]; muscle alpha-actinin binding [GO:0051371]; protease binding [GO:0002020]; protein kinase binding [GO:0019901]; protein self-association [GO:0043621]; protein serine kinas…	condensed nuclear chromosome [GO:0000794]; cytosol [GO:0005829]; extracellular exosome [GO:0070062]; extracellular region [GO:0005576]; I band [GO:0031674]; M band [GO:0031430]; striated muscle thin filament [GO:0005865]; titin-telethonin complex [GO:1990733]; Z disc [GO:0030018]	GO:0000794; GO:0002020; GO:0003300; GO:0004674; GO:0004713; GO:0005509; GO:0005516; GO:0005524; GO:0005576; GO:0005829; GO:0005865; GO:0006936; GO:0006941; GO:0007076; GO:0008307; GO:0010628; GO:0010737; GO:0019899; GO:0019901; GO:0030018; GO:0030240; GO:0030241; GO:0031430; GO:0031433; GO:0031674; GO:0035995; GO:0042802; GO:0042805; GO:0043621; GO:0045214; GO:0045859; GO:0048769; GO:0050714; GO:…	Q8WZ42	0.961452	S33942	SKVLISEEVKKSAATSLEKSIVHEEITKTSQ	15.726	15.3666	15.1543	15.8039	15.4809	15.2912	14.6744	15.0605	14.6679	14.9346
ADCY6_O43306_S54	1.1375	1.1196	0.109588	0.235213	1.45462	-0.512764	-1.11184	-1.53712	-0.387595	-0.507206	ADCY6	Adenylate cyclase type 6	O43306	0.0647209	0.434689	sp|O43306|ADCY6_HUMAN Adenylate cyclase type 6 OS=Homo sapiens OX=9606 GN=ADCY6 PE=1 SV=2	FUNCTION: Catalyzes the formation of the signaling molecule cAMP downstream of G protein-coupled receptors (PubMed:17916776, PubMed:17110384). Functions in signaling cascades downstream of beta-adrenergic receptors in the heart and in vascular smooth muscle cells (PubMed:17916776). Functions in signaling cascades downstream of the vasopressin receptor in the kidney and has a role in renal water r…	SUBCELLULAR LOCATION: Cell membrane {ECO:0000269|PubMed:17110384}; Multi-pass membrane protein {ECO:0000305}. Cell projection, cilium {ECO:0000250|UniProtKB:Q01341}. Cell projection, stereocilium {ECO:0000250|UniProtKB:Q01341}.	DISEASE: Lethal congenital contracture syndrome 8 (LCCS8) [MIM:616287]: A form of lethal congenital contracture syndrome, an autosomal recessive disorder characterized by degeneration of anterior horn neurons, extreme skeletal muscle atrophy and congenital non-progressive joint contractures. The contractures can involve the upper or lower limbs and/or the vertebral column, leading to various degr…	adenylate cyclase-activating G protein-coupled receptor signaling pathway [GO:0007189]; adenylate cyclase-inhibiting G protein-coupled receptor signaling pathway [GO:0007193]; blood vessel diameter maintenance [GO:0097746]; cAMP biosynthetic process [GO:0006171]; cellular response to catecholamine stimulus [GO:0071870]; cellular response to forskolin [GO:1904322]; cellular response to prostagland…	adenylate cyclase activity [GO:0004016]; ATP binding [GO:0005524]; metal ion binding [GO:0046872]; protein kinase binding [GO:0019901]; protein kinase C binding [GO:0005080]	cilium [GO:0005929]; integral component of plasma membrane [GO:0005887]; intrinsic component of plasma membrane [GO:0031226]; membrane [GO:0016020]; plasma membrane [GO:0005886]; stereocilium [GO:0032420]	GO:0003091; GO:0004016; GO:0005080; GO:0005524; GO:0005886; GO:0005887; GO:0005929; GO:0006171; GO:0007189; GO:0007193; GO:0007212; GO:0010977; GO:0016020; GO:0019901; GO:0031226; GO:0032420; GO:0035556; GO:0035811; GO:0046872; GO:0071380; GO:0071870; GO:0097746; GO:1904117; GO:1904322	O43306	0.994478	S54	CTPRYMSCLRDAEPPSPTPAGPPRCPWQDDA	13.1603	13.1555	12.8849	12.9186	13.2452	12.7182	12.5577	12.4438	12.7517	12.7197
TTN_Q8WZ42_S29710	-0.598179	-0.929514	-0.607181	0.204344	-1.4266	-0.486365	0.809137	0.197309	1.85325	0.983798	TTN	Titin	Q8WZ42	0.0664881	-1.12861	sp|Q8WZ42|TITIN_HUMAN Titin OS=Homo sapiens OX=9606 GN=TTN PE=1 SV=4	FUNCTION: Key component in the assembly and functioning of vertebrate striated muscles. By providing connections at the level of individual microfilaments, it contributes to the fine balance of forces between the two halves of the sarcomere. The size and extensibility of the cross-links are the main determinants of sarcomere extensibility properties of muscle. In non-muscle cells, seems to play a…	SUBCELLULAR LOCATION: Cytoplasm {ECO:0000305|PubMed:16410549}. Nucleus {ECO:0000269|PubMed:16410549}.	DISEASE: Myopathy, myofibrillar, 9, with early respiratory failure (MFM9) [MIM:603689]: An autosomal dominant myopathy characterized by adulthood onset of weakness in proximal, distal, axial and respiratory muscles. Pelvic girdle weakness, foot drop and neck weakness are the main symptoms at onset, but ultimately the weakness usually involves the proximal compartment of both upper and lower limbs…	cardiac muscle cell development [GO:0055013]; cardiac muscle contraction [GO:0060048]; cardiac muscle hypertrophy [GO:0003300]; cardiac muscle tissue morphogenesis [GO:0055008]; cardiac myofibril assembly [GO:0055003]; detection of muscle stretch [GO:0035995]; mitotic chromosome condensation [GO:0007076]; muscle contraction [GO:0006936]; positive regulation of gene expression [GO:0010628]; positi…	actin filament binding [GO:0051015]; actinin binding [GO:0042805]; ATP binding [GO:0005524]; calcium ion binding [GO:0005509]; calmodulin binding [GO:0005516]; enzyme binding [GO:0019899]; identical protein binding [GO:0042802]; muscle alpha-actinin binding [GO:0051371]; protease binding [GO:0002020]; protein kinase binding [GO:0019901]; protein self-association [GO:0043621]; protein serine kinas…	condensed nuclear chromosome [GO:0000794]; cytosol [GO:0005829]; extracellular exosome [GO:0070062]; extracellular region [GO:0005576]; I band [GO:0031674]; M band [GO:0031430]; striated muscle thin filament [GO:0005865]; titin-telethonin complex [GO:1990733]; Z disc [GO:0030018]	GO:0000794; GO:0002020; GO:0003300; GO:0004674; GO:0004713; GO:0005509; GO:0005516; GO:0005524; GO:0005576; GO:0005829; GO:0005865; GO:0006936; GO:0006941; GO:0007076; GO:0008307; GO:0010628; GO:0010737; GO:0019899; GO:0019901; GO:0030018; GO:0030240; GO:0030241; GO:0031430; GO:0031433; GO:0031674; GO:0035995; GO:0042802; GO:0042805; GO:0043621; GO:0045214; GO:0045859; GO:0048769; GO:0050714; GO:…	Q8WZ42	0.744433	S29710	GGGTEITNYIVEKRESGTTAWQLVNSSVKRT	11.4865	11.208	11.4789	12.161	10.7902	11.5805	12.6693	12.1551	13.5468	12.8161
TTN_Q8WZ42_S33451	-1.11363	-1.06606	-0.120585	-0.0226142	-1.06077	1.23526	1.69389	0.820211	-0.600167	0.234466	TTN	Titin	Q8WZ42	0.0687926	-0.903756	sp|Q8WZ42|TITIN_HUMAN Titin OS=Homo sapiens OX=9606 GN=TTN PE=1 SV=4	FUNCTION: Key component in the assembly and functioning of vertebrate striated muscles. By providing connections at the level of individual microfilaments, it contributes to the fine balance of forces between the two halves of the sarcomere. The size and extensibility of the cross-links are the main determinants of sarcomere extensibility properties of muscle. In non-muscle cells, seems to play a…	SUBCELLULAR LOCATION: Cytoplasm {ECO:0000305|PubMed:16410549}. Nucleus {ECO:0000269|PubMed:16410549}.	DISEASE: Myopathy, myofibrillar, 9, with early respiratory failure (MFM9) [MIM:603689]: An autosomal dominant myopathy characterized by adulthood onset of weakness in proximal, distal, axial and respiratory muscles. Pelvic girdle weakness, foot drop and neck weakness are the main symptoms at onset, but ultimately the weakness usually involves the proximal compartment of both upper and lower limbs…	cardiac muscle cell development [GO:0055013]; cardiac muscle contraction [GO:0060048]; cardiac muscle hypertrophy [GO:0003300]; cardiac muscle tissue morphogenesis [GO:0055008]; cardiac myofibril assembly [GO:0055003]; detection of muscle stretch [GO:0035995]; mitotic chromosome condensation [GO:0007076]; muscle contraction [GO:0006936]; positive regulation of gene expression [GO:0010628]; positi…	actin filament binding [GO:0051015]; actinin binding [GO:0042805]; ATP binding [GO:0005524]; calcium ion binding [GO:0005509]; calmodulin binding [GO:0005516]; enzyme binding [GO:0019899]; identical protein binding [GO:0042802]; muscle alpha-actinin binding [GO:0051371]; protease binding [GO:0002020]; protein kinase binding [GO:0019901]; protein self-association [GO:0043621]; protein serine kinas…	condensed nuclear chromosome [GO:0000794]; cytosol [GO:0005829]; extracellular exosome [GO:0070062]; extracellular region [GO:0005576]; I band [GO:0031674]; M band [GO:0031430]; striated muscle thin filament [GO:0005865]; titin-telethonin complex [GO:1990733]; Z disc [GO:0030018]	GO:0000794; GO:0002020; GO:0003300; GO:0004674; GO:0004713; GO:0005509; GO:0005516; GO:0005524; GO:0005576; GO:0005829; GO:0005865; GO:0006936; GO:0006941; GO:0007076; GO:0008307; GO:0010628; GO:0010737; GO:0019899; GO:0019901; GO:0030018; GO:0030240; GO:0030241; GO:0031430; GO:0031433; GO:0031674; GO:0035995; GO:0042802; GO:0042805; GO:0043621; GO:0045214; GO:0045859; GO:0048769; GO:0050714; GO:…	Q8WZ42	0.944929	S33451	SSVREVKSQMTETRESLSSYEHSASAEMKSA	15.333	15.3648	15.9961	16.0615	15.3683	16.9015	17.2077	16.6243	15.6759	16.2332
CASQ2_O14958_S393	1.09216	1.15927	1.51729	-0.617275	0.31881	-0.657159	-1.12364	-0.569385	0.158473	-1.27855	CASQ2	Calsequestrin-2	O14958	0.0705034	0.697963	sp|O14958|CASQ2_HUMAN Calsequestrin-2 OS=Homo sapiens OX=9606 GN=CASQ2 PE=1 SV=2	FUNCTION: Calsequestrin is a high-capacity, moderate affinity, calcium-binding protein and thus acts as an internal calcium store in muscle. Calcium ions are bound by clusters of acidic residues at the protein surface, especially at the interface between subunits. Can bind around 60 Ca(2+) ions. Regulates the release of lumenal Ca(2+) via the calcium release channel RYR2; this plays an important …	SUBCELLULAR LOCATION: Sarcoplasmic reticulum lumen {ECO:0000250|UniProtKB:O09161}. Note=This isoform of calsequestrin occurs in the sarcoplasmic reticulum's terminal cisternae luminal spaces of cardiac and slow skeletal muscle cells. {ECO:0000250|UniProtKB:O09161}.	DISEASE: Ventricular tachycardia, catecholaminergic polymorphic, 2 (CPVT2) [MIM:611938]: An arrhythmogenic disorder characterized by stress-induced, bidirectional ventricular tachycardia that may degenerate into cardiac arrest and cause sudden death. Patients present with recurrent syncope, seizures, or sudden death after physical activity or emotional stress. CPVT2 inheritance is autosomal reces…	cardiac muscle contraction [GO:0060048]; cellular calcium ion homeostasis [GO:0006874]; cellular response to caffeine [GO:0071313]; detection of calcium ion [GO:0005513]; negative regulation of potassium ion transmembrane transporter activity [GO:1901017]; negative regulation of potassium ion transport [GO:0043267]; negative regulation of ryanodine-sensitive calcium-release channel activity [GO:0…	calcium ion binding [GO:0005509]; calcium ion sequestering activity [GO:0140314]; calcium-dependent protein binding [GO:0048306]; protein homodimerization activity [GO:0042803]	calcium channel complex [GO:0034704]; cytoplasm [GO:0005737]; junctional sarcoplasmic reticulum membrane [GO:0014701]; sarcoplasmic reticulum [GO:0016529]; sarcoplasmic reticulum lumen [GO:0033018]; sarcoplasmic reticulum membrane [GO:0033017]; Z disc [GO:0030018]	GO:0002027; GO:0005509; GO:0005513; GO:0005737; GO:0006874; GO:0006941; GO:0010649; GO:0010880; GO:0010881; GO:0014701; GO:0016529; GO:0030018; GO:0033017; GO:0033018; GO:0034704; GO:0042803; GO:0043267; GO:0048306; GO:0051208; GO:0051258; GO:0051279; GO:0060048; GO:0060306; GO:0060315; GO:0071313; GO:0086029; GO:0140314; GO:1901017	O14958	1	S393	DDDDDDNSDEEDNDDSDDDDDE_________	17.8351	17.8689	18.0489	16.9756	17.4463	16.9555	16.721	16.9997	17.3656	16.6431
PDE8A_O60658_S457	1.84675	0.677058	0.518141	0.4837	0.564177	-1.32205	-0.594429	-0.622415	-1.33185	-0.219094	PDE8A	High affinity cAMP-specific and IBMX-insensitive 3',5'-cyclic phosphodiesterase 8A	O60658	0.0716384	0.407009	sp|O60658|PDE8A_HUMAN High affinity cAMP-specific and IBMX-insensitive 3',5'-cyclic phosphodiesterase 8A OS=Homo sapiens OX=9606 GN=PDE8A PE=1 SV=2	FUNCTION: Hydrolyzes the second messenger cAMP, which is a key regulator of many important physiological processes (PubMed:18983167). May be involved in maintaining basal levels of the cyclic nucleotide and/or in the cAMP regulation of germ cell development (PubMed:18983167). Binding to RAF1 reduces RAF1 'Ser-259' inhibitory-phosphorylation and stimulates RAF1-dependent EGF-activated ERK-signalin…			cAMP catabolic process [GO:0006198]; cellular response to epidermal growth factor stimulus [GO:0071364]; negative regulation of cell death [GO:0060548]; negative regulation of hydrogen peroxide-induced cell death [GO:1903206]; positive regulation of ERK1 and ERK2 cascade [GO:0070374]; positive regulation of protein phosphorylation [GO:0001934]; regulation of transcription, DNA-templated [GO:00063…	3',5'-cyclic-AMP phosphodiesterase activity [GO:0004115]; 3',5'-cyclic-GMP phosphodiesterase activity [GO:0047555]; 3',5'-cyclic-nucleotide phosphodiesterase activity [GO:0004114]; kinase binding [GO:0019900]; metal ion binding [GO:0046872]	cytosol [GO:0005829]; extracellular exosome [GO:0070062]	GO:0001934; GO:0004114; GO:0004115; GO:0005829; GO:0006198; GO:0006355; GO:0007165; GO:0019900; GO:0046872; GO:0047555; GO:0060548; GO:0070062; GO:0070374; GO:0071364; GO:1903206	O60658	0.999803	S457	NDLVGGLMSDGLRRLSGNEYVLSTKNTQMVS	13.8123	13.5213	13.4817	13.4731	13.4932	13.0239	13.2049	13.198	13.0215	13.2983
AKAP6_Q13023_S1329.1	-0.913261	-1.32044	-1.3727	0.506331	-0.323571	1.659	1.06276	0.274262	-0.0398089	0.467433	AKAP6	A-kinase anchor protein 6	Q13023	0.0739193	-0.714318	sp|Q13023|AKAP6_HUMAN A-kinase anchor protein 6 OS=Homo sapiens OX=9606 GN=AKAP6 PE=1 SV=3	FUNCTION: Binds to type II regulatory subunits of protein kinase A and anchors/targets them to the nuclear membrane or sarcoplasmic reticulum. May act as an adapter for assembling multiprotein complexes.	SUBCELLULAR LOCATION: Sarcoplasmic reticulum. Nucleus membrane. Note=In heart muscle. Participation of multiple targeting signals allow correct intracellular targeting. These may be repeated motifs rich in basic and hydrophobic amino acids, palmitoylated/myristoylated motifs or alternatively splice targeting sequences.		action potential [GO:0001508]; cAMP-mediated signaling [GO:0019933]; cellular response to cAMP [GO:0071320]; cellular response to cytokine stimulus [GO:0071345]; positive regulation of calcineurin-NFAT signaling cascade [GO:0070886]; positive regulation of cell growth [GO:0030307]; positive regulation of cell growth involved in cardiac muscle cell development [GO:0061051]; positive regulation of …	adenylate cyclase binding [GO:0008179]; molecular adaptor activity [GO:0060090]; protein kinase A binding [GO:0051018]; protein kinase A regulatory subunit binding [GO:0034237]; protein-membrane adaptor activity [GO:0043495]; transmembrane transporter binding [GO:0044325]	calcium channel complex [GO:0034704]; caveola [GO:0005901]; cytoplasm [GO:0005737]; intercalated disc [GO:0014704]; junctional sarcoplasmic reticulum membrane [GO:0014701]; nuclear envelope [GO:0005635]; nuclear membrane [GO:0031965]; perinuclear region of cytoplasm [GO:0048471]; sarcoplasmic reticulum [GO:0016529]; T-tubule [GO:0030315]	GO:0001508; GO:0005635; GO:0005737; GO:0005901; GO:0006605; GO:0008179; GO:0010738; GO:0010880; GO:0014701; GO:0014704; GO:0016529; GO:0019933; GO:0030307; GO:0030315; GO:0031965; GO:0034237; GO:0034704; GO:0043495; GO:0044325; GO:0048471; GO:0051018; GO:0051281; GO:0060090; GO:0060306; GO:0060316; GO:0061051; GO:0070886; GO:0071320; GO:0071345; GO:1901381; GO:1902261	Q13023	0.962036	S1329	MTQPNVLTKSLSKDSSFSSTKSLPDLLGGSN	13.5344	13.322	13.2947	14.2748	13.8419	14.8761	14.5651	14.1538	13.99	14.2545
TTN_Q8WZ42_S9578	-0.905334	-1.28501	-0.362709	0.534008	-1.26842	0.512084	2	0.251545	0.290623	0.222187	TTN	Titin	Q8WZ42	0.0739193	-1.13676	sp|Q8WZ42|TITIN_HUMAN Titin OS=Homo sapiens OX=9606 GN=TTN PE=1 SV=4	FUNCTION: Key component in the assembly and functioning of vertebrate striated muscles. By providing connections at the level of individual microfilaments, it contributes to the fine balance of forces between the two halves of the sarcomere. The size and extensibility of the cross-links are the main determinants of sarcomere extensibility properties of muscle. In non-muscle cells, seems to play a…	SUBCELLULAR LOCATION: Cytoplasm {ECO:0000305|PubMed:16410549}. Nucleus {ECO:0000269|PubMed:16410549}.	DISEASE: Myopathy, myofibrillar, 9, with early respiratory failure (MFM9) [MIM:603689]: An autosomal dominant myopathy characterized by adulthood onset of weakness in proximal, distal, axial and respiratory muscles. Pelvic girdle weakness, foot drop and neck weakness are the main symptoms at onset, but ultimately the weakness usually involves the proximal compartment of both upper and lower limbs…	cardiac muscle cell development [GO:0055013]; cardiac muscle contraction [GO:0060048]; cardiac muscle hypertrophy [GO:0003300]; cardiac muscle tissue morphogenesis [GO:0055008]; cardiac myofibril assembly [GO:0055003]; detection of muscle stretch [GO:0035995]; mitotic chromosome condensation [GO:0007076]; muscle contraction [GO:0006936]; positive regulation of gene expression [GO:0010628]; positi…	actin filament binding [GO:0051015]; actinin binding [GO:0042805]; ATP binding [GO:0005524]; calcium ion binding [GO:0005509]; calmodulin binding [GO:0005516]; enzyme binding [GO:0019899]; identical protein binding [GO:0042802]; muscle alpha-actinin binding [GO:0051371]; protease binding [GO:0002020]; protein kinase binding [GO:0019901]; protein self-association [GO:0043621]; protein serine kinas…	condensed nuclear chromosome [GO:0000794]; cytosol [GO:0005829]; extracellular exosome [GO:0070062]; extracellular region [GO:0005576]; I band [GO:0031674]; M band [GO:0031430]; striated muscle thin filament [GO:0005865]; titin-telethonin complex [GO:1990733]; Z disc [GO:0030018]	GO:0000794; GO:0002020; GO:0003300; GO:0004674; GO:0004713; GO:0005509; GO:0005516; GO:0005524; GO:0005576; GO:0005829; GO:0005865; GO:0006936; GO:0006941; GO:0007076; GO:0008307; GO:0010628; GO:0010737; GO:0019899; GO:0019901; GO:0030018; GO:0030240; GO:0030241; GO:0031430; GO:0031433; GO:0031674; GO:0035995; GO:0042802; GO:0042805; GO:0043621; GO:0045214; GO:0045859; GO:0048769; GO:0050714; GO:…	Q8WZ42	0.977131	S9578	EKEFEELVSFIQQRLSQTEPVTLIKDIENQT	10.7081	10.3799	11.1772	11.9524	10.3943	11.9334	13.2292	11.7082	11.742	11.6828
TTN_Q8WZ42_S17515	-0.867324	-1.29797	-0.239257	0.0850171	-1.00038	0.00823394	0.170049	-0.00483585	2	1.06399	TTN	Titin	Q8WZ42	0.074719	-0.944282	sp|Q8WZ42|TITIN_HUMAN Titin OS=Homo sapiens OX=9606 GN=TTN PE=1 SV=4	FUNCTION: Key component in the assembly and functioning of vertebrate striated muscles. By providing connections at the level of individual microfilaments, it contributes to the fine balance of forces between the two halves of the sarcomere. The size and extensibility of the cross-links are the main determinants of sarcomere extensibility properties of muscle. In non-muscle cells, seems to play a…	SUBCELLULAR LOCATION: Cytoplasm {ECO:0000305|PubMed:16410549}. Nucleus {ECO:0000269|PubMed:16410549}.	DISEASE: Myopathy, myofibrillar, 9, with early respiratory failure (MFM9) [MIM:603689]: An autosomal dominant myopathy characterized by adulthood onset of weakness in proximal, distal, axial and respiratory muscles. Pelvic girdle weakness, foot drop and neck weakness are the main symptoms at onset, but ultimately the weakness usually involves the proximal compartment of both upper and lower limbs…	cardiac muscle cell development [GO:0055013]; cardiac muscle contraction [GO:0060048]; cardiac muscle hypertrophy [GO:0003300]; cardiac muscle tissue morphogenesis [GO:0055008]; cardiac myofibril assembly [GO:0055003]; detection of muscle stretch [GO:0035995]; mitotic chromosome condensation [GO:0007076]; muscle contraction [GO:0006936]; positive regulation of gene expression [GO:0010628]; positi…	actin filament binding [GO:0051015]; actinin binding [GO:0042805]; ATP binding [GO:0005524]; calcium ion binding [GO:0005509]; calmodulin binding [GO:0005516]; enzyme binding [GO:0019899]; identical protein binding [GO:0042802]; muscle alpha-actinin binding [GO:0051371]; protease binding [GO:0002020]; protein kinase binding [GO:0019901]; protein self-association [GO:0043621]; protein serine kinas…	condensed nuclear chromosome [GO:0000794]; cytosol [GO:0005829]; extracellular exosome [GO:0070062]; extracellular region [GO:0005576]; I band [GO:0031674]; M band [GO:0031430]; striated muscle thin filament [GO:0005865]; titin-telethonin complex [GO:1990733]; Z disc [GO:0030018]	GO:0000794; GO:0002020; GO:0003300; GO:0004674; GO:0004713; GO:0005509; GO:0005516; GO:0005524; GO:0005576; GO:0005829; GO:0005865; GO:0006936; GO:0006941; GO:0007076; GO:0008307; GO:0010628; GO:0010737; GO:0019899; GO:0019901; GO:0030018; GO:0030240; GO:0030241; GO:0031430; GO:0031433; GO:0031674; GO:0035995; GO:0042802; GO:0042805; GO:0043621; GO:0045214; GO:0045859; GO:0048769; GO:0050714; GO:…	Q8WZ42	0.999996	S17515	TTAISSSMVIKNCQRSHQGVYSLLAKNEAGE	11.7672	11.461	12.2138	12.4444	11.6726	12.3898	12.5048	12.3805	13.8647	13.1405
PRKAR1A_P10644_S77.2	-0.515247	-1.00357	-1.1877	0.128486	-0.703183	0.780235	1.06171	0.947463	-0.989242	1.48104	PRKAR1A	cAMP-dependent protein kinase type I-alpha regulatory subunit;cAMP-dependent protein kinase type I-alpha regulatory subunit, N-terminally processed	P10644	0.0754505	-1.07824	sp|P10644|KAP0_HUMAN cAMP-dependent protein kinase type I-alpha regulatory subunit OS=Homo sapiens OX=9606 GN=PRKAR1A PE=1 SV=1	FUNCTION: Regulatory subunit of the cAMP-dependent protein kinases involved in cAMP signaling in cells. {ECO:0000269|PubMed:16491121, ECO:0000269|PubMed:20215566, ECO:0000269|PubMed:26405036}.	SUBCELLULAR LOCATION: Cell membrane {ECO:0000269|PubMed:23115245}.	DISEASE: Carney complex 1 (CNC1) [MIM:160980]: CNC is a multiple neoplasia syndrome characterized by spotty skin pigmentation, cardiac and other myxomas, endocrine tumors, and psammomatous melanotic schwannomas. {ECO:0000269|PubMed:15371594, ECO:0000269|PubMed:18241045, ECO:0000269|PubMed:22785148, ECO:0000269|PubMed:23323113, ECO:0000269|PubMed:26405036}. Note=The disease is caused by variants a…	cardiac muscle cell proliferation [GO:0060038]; intracellular signal transduction [GO:0035556]; mesoderm formation [GO:0001707]; negative regulation of activated T cell proliferation [GO:0046007]; negative regulation of cAMP-dependent protein kinase activity [GO:2000480]; negative regulation of gene expression [GO:0010629]; regulation of transcription by RNA polymerase II [GO:0006357]; sarcomere …	cAMP binding [GO:0030552]; cAMP-dependent protein kinase inhibitor activity [GO:0004862]; cAMP-dependent protein kinase regulator activity [GO:0008603]; protein domain specific binding [GO:0019904]; protein kinase A catalytic subunit binding [GO:0034236]; ubiquitin protein ligase binding [GO:0031625]	cAMP-dependent protein kinase complex [GO:0005952]; centrosome [GO:0005813]; ciliary base [GO:0097546]; cytoplasm [GO:0005737]; cytosol [GO:0005829]; glutamatergic synapse [GO:0098978]; membrane [GO:0016020]; multivesicular body [GO:0005771]; neuromuscular junction [GO:0031594]; nucleotide-activated protein kinase complex [GO:0031588]; plasma membrane raft [GO:0044853]; protein-containing complex…	GO:0001707; GO:0004862; GO:0005737; GO:0005771; GO:0005813; GO:0005829; GO:0005952; GO:0006357; GO:0008603; GO:0010629; GO:0016020; GO:0019904; GO:0030552; GO:0031588; GO:0031594; GO:0031625; GO:0032991; GO:0034236; GO:0035556; GO:0044853; GO:0045214; GO:0046007; GO:0060038; GO:0097224; GO:0097546; GO:0098978; GO:2000480	P10644	0.907918	S77	AKQIQNLQKAGTRTDSREDEISPPPPNPVVK	12.7855	12.3843	12.2331	13.3143	12.6311	13.8498	14.081	13.9871	12.3961	14.4255
PRKAR1A_P10644_S83.2	-0.515247	-1.00357	-1.1877	0.128486	-0.703183	0.780235	1.06171	0.947463	-0.989242	1.48104	PRKAR1A	cAMP-dependent protein kinase type I-alpha regulatory subunit;cAMP-dependent protein kinase type I-alpha regulatory subunit, N-terminally processed	P10644	0.0754505	-1.07824	sp|P10644|KAP0_HUMAN cAMP-dependent protein kinase type I-alpha regulatory subunit OS=Homo sapiens OX=9606 GN=PRKAR1A PE=1 SV=1	FUNCTION: Regulatory subunit of the cAMP-dependent protein kinases involved in cAMP signaling in cells. {ECO:0000269|PubMed:16491121, ECO:0000269|PubMed:20215566, ECO:0000269|PubMed:26405036}.	SUBCELLULAR LOCATION: Cell membrane {ECO:0000269|PubMed:23115245}.	DISEASE: Carney complex 1 (CNC1) [MIM:160980]: CNC is a multiple neoplasia syndrome characterized by spotty skin pigmentation, cardiac and other myxomas, endocrine tumors, and psammomatous melanotic schwannomas. {ECO:0000269|PubMed:15371594, ECO:0000269|PubMed:18241045, ECO:0000269|PubMed:22785148, ECO:0000269|PubMed:23323113, ECO:0000269|PubMed:26405036}. Note=The disease is caused by variants a…	cardiac muscle cell proliferation [GO:0060038]; intracellular signal transduction [GO:0035556]; mesoderm formation [GO:0001707]; negative regulation of activated T cell proliferation [GO:0046007]; negative regulation of cAMP-dependent protein kinase activity [GO:2000480]; negative regulation of gene expression [GO:0010629]; regulation of transcription by RNA polymerase II [GO:0006357]; sarcomere …	cAMP binding [GO:0030552]; cAMP-dependent protein kinase inhibitor activity [GO:0004862]; cAMP-dependent protein kinase regulator activity [GO:0008603]; protein domain specific binding [GO:0019904]; protein kinase A catalytic subunit binding [GO:0034236]; ubiquitin protein ligase binding [GO:0031625]	cAMP-dependent protein kinase complex [GO:0005952]; centrosome [GO:0005813]; ciliary base [GO:0097546]; cytoplasm [GO:0005737]; cytosol [GO:0005829]; glutamatergic synapse [GO:0098978]; membrane [GO:0016020]; multivesicular body [GO:0005771]; neuromuscular junction [GO:0031594]; nucleotide-activated protein kinase complex [GO:0031588]; plasma membrane raft [GO:0044853]; protein-containing complex…	GO:0001707; GO:0004862; GO:0005737; GO:0005771; GO:0005813; GO:0005829; GO:0005952; GO:0006357; GO:0008603; GO:0010629; GO:0016020; GO:0019904; GO:0030552; GO:0031588; GO:0031594; GO:0031625; GO:0032991; GO:0034236; GO:0035556; GO:0044853; GO:0045214; GO:0046007; GO:0060038; GO:0097224; GO:0097546; GO:0098978; GO:2000480	P10644	1	S83	LQKAGTRTDSREDEISPPPPNPVVKGRRRRG	12.7855	12.3843	12.2331	13.3143	12.6311	13.8498	14.081	13.9871	12.3961	14.4255
PRKAR1A_P10644_T73.2	-0.515247	-1.00357	-1.1877	0.128486	-0.703183	0.780235	1.06171	0.947463	-0.989242	1.48104	PRKAR1A	cAMP-dependent protein kinase type I-alpha regulatory subunit;cAMP-dependent protein kinase type I-alpha regulatory subunit, N-terminally processed	P10644	0.0754505	-1.07824	sp|P10644|KAP0_HUMAN cAMP-dependent protein kinase type I-alpha regulatory subunit OS=Homo sapiens OX=9606 GN=PRKAR1A PE=1 SV=1	FUNCTION: Regulatory subunit of the cAMP-dependent protein kinases involved in cAMP signaling in cells. {ECO:0000269|PubMed:16491121, ECO:0000269|PubMed:20215566, ECO:0000269|PubMed:26405036}.	SUBCELLULAR LOCATION: Cell membrane {ECO:0000269|PubMed:23115245}.	DISEASE: Carney complex 1 (CNC1) [MIM:160980]: CNC is a multiple neoplasia syndrome characterized by spotty skin pigmentation, cardiac and other myxomas, endocrine tumors, and psammomatous melanotic schwannomas. {ECO:0000269|PubMed:15371594, ECO:0000269|PubMed:18241045, ECO:0000269|PubMed:22785148, ECO:0000269|PubMed:23323113, ECO:0000269|PubMed:26405036}. Note=The disease is caused by variants a…	cardiac muscle cell proliferation [GO:0060038]; intracellular signal transduction [GO:0035556]; mesoderm formation [GO:0001707]; negative regulation of activated T cell proliferation [GO:0046007]; negative regulation of cAMP-dependent protein kinase activity [GO:2000480]; negative regulation of gene expression [GO:0010629]; regulation of transcription by RNA polymerase II [GO:0006357]; sarcomere …	cAMP binding [GO:0030552]; cAMP-dependent protein kinase inhibitor activity [GO:0004862]; cAMP-dependent protein kinase regulator activity [GO:0008603]; protein domain specific binding [GO:0019904]; protein kinase A catalytic subunit binding [GO:0034236]; ubiquitin protein ligase binding [GO:0031625]	cAMP-dependent protein kinase complex [GO:0005952]; centrosome [GO:0005813]; ciliary base [GO:0097546]; cytoplasm [GO:0005737]; cytosol [GO:0005829]; glutamatergic synapse [GO:0098978]; membrane [GO:0016020]; multivesicular body [GO:0005771]; neuromuscular junction [GO:0031594]; nucleotide-activated protein kinase complex [GO:0031588]; plasma membrane raft [GO:0044853]; protein-containing complex…	GO:0001707; GO:0004862; GO:0005737; GO:0005771; GO:0005813; GO:0005829; GO:0005952; GO:0006357; GO:0008603; GO:0010629; GO:0016020; GO:0019904; GO:0030552; GO:0031588; GO:0031594; GO:0031625; GO:0032991; GO:0034236; GO:0035556; GO:0044853; GO:0045214; GO:0046007; GO:0060038; GO:0097224; GO:0097546; GO:0098978; GO:2000480	P10644	0.856669	T73	EKEEAKQIQNLQKAGTRTDSREDEISPPPPN	12.7855	12.3843	12.2331	13.3143	12.6311	13.8498	14.081	13.9871	12.3961	14.4255
TTN_Q8WZ42_S25058	-1.55621	0.105899	-0.439309	0.277321	-1.63881	0.114133	-0.0336584	1.00472	1.43094	0.734978	TTN	Titin	Q8WZ42	0.0764679	-1.23637	sp|Q8WZ42|TITIN_HUMAN Titin OS=Homo sapiens OX=9606 GN=TTN PE=1 SV=4	FUNCTION: Key component in the assembly and functioning of vertebrate striated muscles. By providing connections at the level of individual microfilaments, it contributes to the fine balance of forces between the two halves of the sarcomere. The size and extensibility of the cross-links are the main determinants of sarcomere extensibility properties of muscle. In non-muscle cells, seems to play a…	SUBCELLULAR LOCATION: Cytoplasm {ECO:0000305|PubMed:16410549}. Nucleus {ECO:0000269|PubMed:16410549}.	DISEASE: Myopathy, myofibrillar, 9, with early respiratory failure (MFM9) [MIM:603689]: An autosomal dominant myopathy characterized by adulthood onset of weakness in proximal, distal, axial and respiratory muscles. Pelvic girdle weakness, foot drop and neck weakness are the main symptoms at onset, but ultimately the weakness usually involves the proximal compartment of both upper and lower limbs…	cardiac muscle cell development [GO:0055013]; cardiac muscle contraction [GO:0060048]; cardiac muscle hypertrophy [GO:0003300]; cardiac muscle tissue morphogenesis [GO:0055008]; cardiac myofibril assembly [GO:0055003]; detection of muscle stretch [GO:0035995]; mitotic chromosome condensation [GO:0007076]; muscle contraction [GO:0006936]; positive regulation of gene expression [GO:0010628]; positi…	actin filament binding [GO:0051015]; actinin binding [GO:0042805]; ATP binding [GO:0005524]; calcium ion binding [GO:0005509]; calmodulin binding [GO:0005516]; enzyme binding [GO:0019899]; identical protein binding [GO:0042802]; muscle alpha-actinin binding [GO:0051371]; protease binding [GO:0002020]; protein kinase binding [GO:0019901]; protein self-association [GO:0043621]; protein serine kinas…	condensed nuclear chromosome [GO:0000794]; cytosol [GO:0005829]; extracellular exosome [GO:0070062]; extracellular region [GO:0005576]; I band [GO:0031674]; M band [GO:0031430]; striated muscle thin filament [GO:0005865]; titin-telethonin complex [GO:1990733]; Z disc [GO:0030018]	GO:0000794; GO:0002020; GO:0003300; GO:0004674; GO:0004713; GO:0005509; GO:0005516; GO:0005524; GO:0005576; GO:0005829; GO:0005865; GO:0006936; GO:0006941; GO:0007076; GO:0008307; GO:0010628; GO:0010737; GO:0019899; GO:0019901; GO:0030018; GO:0030240; GO:0030241; GO:0031430; GO:0031433; GO:0031674; GO:0035995; GO:0042802; GO:0042805; GO:0043621; GO:0045214; GO:0045859; GO:0048769; GO:0050714; GO:…	Q8WZ42	1	S25058	PGPPQNLAVKEVRKDSAFLVWEPPIIDGGAK	7.82965	9.40987	8.89152	9.57285	7.75112	9.4177	9.27719	10.2644	10.6696	10.008
MYBPC3_Q14896_S275	-1.35503	-1.13772	-0.718251	1.03562	-1.27687	0.830333	0.359108	0.535325	0.700026	1.02746	MYBPC3	Myosin-binding protein C, cardiac-type	Q14896	0.076777	-0.637915	sp|Q14896|MYPC3_HUMAN Myosin-binding protein C, cardiac-type OS=Homo sapiens OX=9606 GN=MYBPC3 PE=1 SV=4	FUNCTION: Thick filament-associated protein located in the crossbridge region of vertebrate striated muscle a bands. In vitro it binds MHC, F-actin and native thin filaments, and modifies the activity of actin-activated myosin ATPase. It may modulate muscle contraction or may play a more structural role.		DISEASE: Cardiomyopathy, familial hypertrophic 4 (CMH4) [MIM:115197]: A hereditary heart disorder characterized by ventricular hypertrophy, which is usually asymmetric and often involves the interventricular septum. The symptoms include dyspnea, syncope, collapse, palpitations, and chest pain. They can be readily provoked by exercise. The disorder has inter- and intrafamilial variability ranging …	cardiac muscle contraction [GO:0060048]; cell adhesion [GO:0007155]; heart morphogenesis [GO:0003007]; positive regulation of ATP-dependent activity [GO:0032781]; regulation of muscle filament sliding [GO:0032971]; regulation of striated muscle contraction [GO:0006942]; ventricular cardiac muscle tissue morphogenesis [GO:0055010]	actin binding [GO:0003779]; ATPase activator activity [GO:0001671]; identical protein binding [GO:0042802]; metal ion binding [GO:0046872]; myosin binding [GO:0017022]; myosin heavy chain binding [GO:0032036]; structural constituent of muscle [GO:0008307]; titin binding [GO:0031432]	A band [GO:0031672]; C zone [GO:0014705]; cardiac myofibril [GO:0097512]; cytosol [GO:0005829]; sarcomere [GO:0030017]; striated muscle myosin thick filament [GO:0005863]	GO:0001671; GO:0003007; GO:0003779; GO:0005829; GO:0005863; GO:0006942; GO:0007155; GO:0008307; GO:0014705; GO:0017022; GO:0030017; GO:0031432; GO:0031672; GO:0032036; GO:0032781; GO:0032971; GO:0042802; GO:0046872; GO:0055010; GO:0060048; GO:0097512	Q14896	0.992195	S275	MGTGDLDLLSAFRRTSLAGGGRRISDSHEDT	17.0628	17.1631	17.3569	18.1671	17.0989	18.0723	17.8546	17.936	18.0121	18.1634
SCN5A_Q14524_T38	-0.689958	-0.68684	-0.738327	-0.545059	-0.582191	0.71897	-0.543175	2	-0.314078	1.3396	SCN5A	Sodium channel protein type 5 subunit alpha	Q14524	0.0794287	-1.15484	sp|Q14524|SCN5A_HUMAN Sodium channel protein type 5 subunit alpha OS=Homo sapiens OX=9606 GN=SCN5A PE=1 SV=2	FUNCTION: This protein mediates the voltage-dependent sodium ion permeability of excitable membranes. Assuming opened or closed conformations in response to the voltage difference across the membrane, the protein forms a sodium-selective channel through which Na(+) ions may pass in accordance with their electrochemical gradient (PubMed:1309946, PubMed:21447824, PubMed:25370050, PubMed:23420830, P…	SUBCELLULAR LOCATION: Cell membrane {ECO:0000269|PubMed:1309946, ECO:0000269|PubMed:19074138, ECO:0000269|PubMed:21447824, ECO:0000269|PubMed:23085483, ECO:0000269|PubMed:23420830, ECO:0000269|PubMed:25370050, ECO:0000269|PubMed:26279430}; Multi-pass membrane protein {ECO:0000250|UniProtKB:D0E0C2}. Cytoplasm, perinuclear region {ECO:0000269|PubMed:21447824}. Cell membrane, sarcolemma, T-tubule {E…	DISEASE: Progressive familial heart block 1A (PFHB1A) [MIM:113900]: A cardiac bundle branch disorder characterized by progressive alteration of cardiac conduction through the His-Purkinje system, with a pattern of a right bundle-branch block and/or left anterior hemiblock occurring individually or together. It leads to complete atrio-ventricular block causing syncope and sudden death. {ECO:000026…	atrial cardiac muscle cell action potential [GO:0086014]; AV node cell action potential [GO:0086016]; AV node cell to bundle of His cell communication [GO:0086067]; brainstem development [GO:0003360]; bundle of His cell action potential [GO:0086043]; cardiac conduction system development [GO:0003161]; cardiac muscle cell action potential involved in contraction [GO:0086002]; cardiac muscle contra…	ankyrin binding [GO:0030506]; calmodulin binding [GO:0005516]; enzyme binding [GO:0019899]; fibroblast growth factor binding [GO:0017134]; nitric-oxide synthase binding [GO:0050998]; protein domain specific binding [GO:0019904]; protein kinase binding [GO:0019901]; scaffold protein binding [GO:0097110]; transmembrane transporter binding [GO:0044325]; ubiquitin protein ligase binding [GO:0031625];…	caveola [GO:0005901]; cell surface [GO:0009986]; endoplasmic reticulum [GO:0005783]; integral component of membrane [GO:0016021]; intercalated disc [GO:0014704]; lateral plasma membrane [GO:0016328]; nucleolus [GO:0005730]; nucleoplasm [GO:0005654]; perinuclear region of cytoplasm [GO:0048471]; plasma membrane [GO:0005886]; sarcolemma [GO:0042383]; T-tubule [GO:0030315]; voltage-gated sodium chan…	GO:0001518; GO:0002027; GO:0003161; GO:0003231; GO:0003360; GO:0005244; GO:0005248; GO:0005516; GO:0005654; GO:0005730; GO:0005783; GO:0005886; GO:0005901; GO:0006814; GO:0009986; GO:0010765; GO:0014704; GO:0014894; GO:0016021; GO:0016328; GO:0017134; GO:0019228; GO:0019899; GO:0019901; GO:0019904; GO:0021537; GO:0021549; GO:0030018; GO:0030315; GO:0030506; GO:0031625; GO:0035725; GO:0042383; GO:…	Q14524	0.701547	T38	AIEKRMAEKQARGSTTLQESREGLPEEEAPR	11.7318	11.7346	11.6887	11.8608	11.8277	12.9863	11.8625	14.1636	12.0665	13.539
MYLK_Q15746_S1779	0.149676	1.13455	0.381884	0.459055	1.17367	-1.09646	-1.29043	-1.54752	0.813819	-0.178243	MYLK	Myosin light chain kinase, smooth muscle;Myosin light chain kinase, smooth muscle, deglutamylated form	Q15746	0.0794287	0.876333	sp|Q15746|MYLK_HUMAN Myosin light chain kinase, smooth muscle OS=Homo sapiens OX=9606 GN=MYLK PE=1 SV=4	FUNCTION: Calcium/calmodulin-dependent myosin light chain kinase implicated in smooth muscle contraction via phosphorylation of myosin light chains (MLC). Also regulates actin-myosin interaction through a non-kinase activity. Phosphorylates PTK2B/PYK2 and myosin light-chains. Involved in the inflammatory response (e.g. apoptosis, vascular permeability, leukocyte diapedesis), cell motility and mor…	SUBCELLULAR LOCATION: Cytoplasm {ECO:0000269|PubMed:20053363}. Cell projection, lamellipodium {ECO:0000269|PubMed:20053363}. Cleavage furrow {ECO:0000269|PubMed:15020676}. Cytoplasm, cytoskeleton, stress fiber {ECO:0000269|PubMed:15020676}. Note=Localized to stress fibers during interphase and to the cleavage furrow during mitosis. {ECO:0000269|PubMed:15020676}.	DISEASE: Aortic aneurysm, familial thoracic 7 (AAT7) [MIM:613780]: A disease characterized by permanent dilation of the thoracic aorta usually due to degenerative changes in the aortic wall. It is primarily associated with a characteristic histologic appearance known as 'medial necrosis' or 'Erdheim cystic medial necrosis' in which there is degeneration and fragmentation of elastic fibers, loss o…	aorta smooth muscle tissue morphogenesis [GO:0060414]; bleb assembly [GO:0032060]; cellular hypotonic response [GO:0071476]; positive regulation of calcium ion transport [GO:0051928]; positive regulation of cell migration [GO:0030335]; positive regulation of wound healing [GO:0090303]; protein phosphorylation [GO:0006468]; smooth muscle contraction [GO:0006939]; tonic smooth muscle contraction [G…	actin binding [GO:0003779]; ATP binding [GO:0005524]; calmodulin binding [GO:0005516]; metal ion binding [GO:0046872]; myosin light chain kinase activity [GO:0004687]; protein kinase activity [GO:0004672]	actin cytoskeleton [GO:0015629]; cleavage furrow [GO:0032154]; cytoplasm [GO:0005737]; cytosol [GO:0005829]; lamellipodium [GO:0030027]; plasma membrane [GO:0005886]; stress fiber [GO:0001725]	GO:0001725; GO:0003779; GO:0004672; GO:0004687; GO:0005516; GO:0005524; GO:0005737; GO:0005829; GO:0005886; GO:0006468; GO:0006939; GO:0014820; GO:0015629; GO:0030027; GO:0030335; GO:0032060; GO:0032154; GO:0046872; GO:0051928; GO:0060414; GO:0071476; GO:0090303	Q15746	0.981291	S1779	ISGLSGRKSSTGSPTSPLNAEKLESEEDVSQ	13.6959	14.3499	13.8501	13.9013	14.3759	12.8683	12.7395	12.5687	14.1369	13.4781
AKAP6_Q13023_S1325.1	-0.634625	-1.28583	-1.50198	0.439128	-0.383756	1.62759	1.14879	0.217121	-0.17527	0.548825	AKAP6	A-kinase anchor protein 6	Q13023	0.0807984	-0.700167	sp|Q13023|AKAP6_HUMAN A-kinase anchor protein 6 OS=Homo sapiens OX=9606 GN=AKAP6 PE=1 SV=3	FUNCTION: Binds to type II regulatory subunits of protein kinase A and anchors/targets them to the nuclear membrane or sarcoplasmic reticulum. May act as an adapter for assembling multiprotein complexes.	SUBCELLULAR LOCATION: Sarcoplasmic reticulum. Nucleus membrane. Note=In heart muscle. Participation of multiple targeting signals allow correct intracellular targeting. These may be repeated motifs rich in basic and hydrophobic amino acids, palmitoylated/myristoylated motifs or alternatively splice targeting sequences.		action potential [GO:0001508]; cAMP-mediated signaling [GO:0019933]; cellular response to cAMP [GO:0071320]; cellular response to cytokine stimulus [GO:0071345]; positive regulation of calcineurin-NFAT signaling cascade [GO:0070886]; positive regulation of cell growth [GO:0030307]; positive regulation of cell growth involved in cardiac muscle cell development [GO:0061051]; positive regulation of …	adenylate cyclase binding [GO:0008179]; molecular adaptor activity [GO:0060090]; protein kinase A binding [GO:0051018]; protein kinase A regulatory subunit binding [GO:0034237]; protein-membrane adaptor activity [GO:0043495]; transmembrane transporter binding [GO:0044325]	calcium channel complex [GO:0034704]; caveola [GO:0005901]; cytoplasm [GO:0005737]; intercalated disc [GO:0014704]; junctional sarcoplasmic reticulum membrane [GO:0014701]; nuclear envelope [GO:0005635]; nuclear membrane [GO:0031965]; perinuclear region of cytoplasm [GO:0048471]; sarcoplasmic reticulum [GO:0016529]; T-tubule [GO:0030315]	GO:0001508; GO:0005635; GO:0005737; GO:0005901; GO:0006605; GO:0008179; GO:0010738; GO:0010880; GO:0014701; GO:0014704; GO:0016529; GO:0019933; GO:0030307; GO:0030315; GO:0031965; GO:0034237; GO:0034704; GO:0043495; GO:0044325; GO:0048471; GO:0051018; GO:0051281; GO:0060090; GO:0060306; GO:0060316; GO:0061051; GO:0070886; GO:0071320; GO:0071345; GO:1901381; GO:1902261	Q13023	0.895017	S1325	KVTGMTQPNVLTKSLSKDSSFSSTKSLPDLL	13.2262	12.8877	12.7753	13.7844	13.3566	14.4023	14.1533	13.669	13.465	13.8414
PDE4D_Q08499_S197.1	-1.11664	-1.04019	-0.923847	0.638051	-0.817143	0.679919	1.25218	1.47531	-0.586229	0.43859	PDE4D	cAMP-specific 3',5'-cyclic phosphodiesterase 4D;cAMP-specific 3',5'-cyclic phosphodiesterase 4B	Q08499	0.0839094	-0.888256	sp|Q08499|PDE4D_HUMAN cAMP-specific 3',5'-cyclic phosphodiesterase 4D OS=Homo sapiens OX=9606 GN=PDE4D PE=1 SV=2;sp|Q07343|PDE4B_HUMAN cAMP-specific 3',5'-cyclic phosphodiesterase 4B OS=Homo sapiens OX=9606 GN=PDE4B PE=1 SV=1	FUNCTION: Hydrolyzes the second messenger cAMP, which is a key regulator of many important physiological processes. {ECO:0000269|PubMed:15260978, ECO:0000269|PubMed:15576036, ECO:0000269|PubMed:9371713}.	SUBCELLULAR LOCATION: Apical cell membrane {ECO:0000269|PubMed:14500724}. Cytoplasm {ECO:0000250}. Membrane {ECO:0000250}. Cytoplasm, cytoskeleton {ECO:0000250}. Cytoplasm, cytoskeleton, microtubule organizing center, centrosome {ECO:0000250}. Note=Found in the soluble fraction, associated with membranes, and associated with the cytoskeleton and the centrosome (By similarity). Colocalized with SH…	DISEASE: Note=Genetic variations in PDE4D might be associated with susceptibility to stroke. PubMed:17006457 states that association with stroke has to be considered with caution. {ECO:0000269|PubMed:17006457}.; DISEASE: Acrodysostosis 2, with or without hormone resistance (ACRDYS2) [MIM:614613]: A pleiotropic disorder characterized by skeletal, endocrine, and neurological abnormalities. Skeletal…	adenylate cyclase-activating adrenergic receptor signaling pathway involved in positive regulation of heart rate [GO:0086024]; adrenergic receptor signaling pathway [GO:0071875]; cAMP catabolic process [GO:0006198]; cAMP-mediated signaling [GO:0019933]; cellular response to cAMP [GO:0071320]; cellular response to epinephrine stimulus [GO:0071872]; establishment of endothelial barrier [GO:0061028]…	3',5'-cyclic-AMP phosphodiesterase activity [GO:0004115]; 3',5'-cyclic-nucleotide phosphodiesterase activity [GO:0004114]; ATPase binding [GO:0051117]; beta-2 adrenergic receptor binding [GO:0031698]; cAMP binding [GO:0030552]; enzyme binding [GO:0019899]; heterocyclic compound binding [GO:1901363]; metal ion binding [GO:0046872]; scaffold protein binding [GO:0097110]; transmembrane transporter b…	apical plasma membrane [GO:0016324]; calcium channel complex [GO:0034704]; cytosol [GO:0005829]; membrane [GO:0016020]; microtubule organizing center [GO:0005815]; nucleus [GO:0005634]; perinuclear region of cytoplasm [GO:0048471]; plasma membrane [GO:0005886]; voltage-gated calcium channel complex [GO:0005891]	GO:0002027; GO:0004114; GO:0004115; GO:0005634; GO:0005815; GO:0005829; GO:0005886; GO:0005891; GO:0006198; GO:0007165; GO:0010469; GO:0010880; GO:0016020; GO:0016324; GO:0019899; GO:0019933; GO:0030552; GO:0031698; GO:0032729; GO:0032743; GO:0032754; GO:0033137; GO:0034704; GO:0043951; GO:0044325; GO:0045822; GO:0046872; GO:0048471; GO:0050852; GO:0051117; GO:0060314; GO:0061028; GO:0071320; GO:…	Q08499;Q07343	0.895115	S197	FVHSQRRESFLYRSDSDYDLSPKSMSRNSSI	11.4753	11.5274	11.6067	12.6707	11.6794	12.6992	13.089	13.241	11.8367	12.5348
PDE4D_Q08499_S202.1	-1.11664	-1.04019	-0.923847	0.638051	-0.817143	0.679919	1.25218	1.47531	-0.586229	0.43859	PDE4D	cAMP-specific 3',5'-cyclic phosphodiesterase 4D;cAMP-specific 3',5'-cyclic phosphodiesterase 4B	Q08499	0.0839094	-0.888256	sp|Q08499|PDE4D_HUMAN cAMP-specific 3',5'-cyclic phosphodiesterase 4D OS=Homo sapiens OX=9606 GN=PDE4D PE=1 SV=2;sp|Q07343|PDE4B_HUMAN cAMP-specific 3',5'-cyclic phosphodiesterase 4B OS=Homo sapiens OX=9606 GN=PDE4B PE=1 SV=1	FUNCTION: Hydrolyzes the second messenger cAMP, which is a key regulator of many important physiological processes. {ECO:0000269|PubMed:15260978, ECO:0000269|PubMed:15576036, ECO:0000269|PubMed:9371713}.	SUBCELLULAR LOCATION: Apical cell membrane {ECO:0000269|PubMed:14500724}. Cytoplasm {ECO:0000250}. Membrane {ECO:0000250}. Cytoplasm, cytoskeleton {ECO:0000250}. Cytoplasm, cytoskeleton, microtubule organizing center, centrosome {ECO:0000250}. Note=Found in the soluble fraction, associated with membranes, and associated with the cytoskeleton and the centrosome (By similarity). Colocalized with SH…	DISEASE: Note=Genetic variations in PDE4D might be associated with susceptibility to stroke. PubMed:17006457 states that association with stroke has to be considered with caution. {ECO:0000269|PubMed:17006457}.; DISEASE: Acrodysostosis 2, with or without hormone resistance (ACRDYS2) [MIM:614613]: A pleiotropic disorder characterized by skeletal, endocrine, and neurological abnormalities. Skeletal…	adenylate cyclase-activating adrenergic receptor signaling pathway involved in positive regulation of heart rate [GO:0086024]; adrenergic receptor signaling pathway [GO:0071875]; cAMP catabolic process [GO:0006198]; cAMP-mediated signaling [GO:0019933]; cellular response to cAMP [GO:0071320]; cellular response to epinephrine stimulus [GO:0071872]; establishment of endothelial barrier [GO:0061028]…	3',5'-cyclic-AMP phosphodiesterase activity [GO:0004115]; 3',5'-cyclic-nucleotide phosphodiesterase activity [GO:0004114]; ATPase binding [GO:0051117]; beta-2 adrenergic receptor binding [GO:0031698]; cAMP binding [GO:0030552]; enzyme binding [GO:0019899]; heterocyclic compound binding [GO:1901363]; metal ion binding [GO:0046872]; scaffold protein binding [GO:0097110]; transmembrane transporter b…	apical plasma membrane [GO:0016324]; calcium channel complex [GO:0034704]; cytosol [GO:0005829]; membrane [GO:0016020]; microtubule organizing center [GO:0005815]; nucleus [GO:0005634]; perinuclear region of cytoplasm [GO:0048471]; plasma membrane [GO:0005886]; voltage-gated calcium channel complex [GO:0005891]	GO:0002027; GO:0004114; GO:0004115; GO:0005634; GO:0005815; GO:0005829; GO:0005886; GO:0005891; GO:0006198; GO:0007165; GO:0010469; GO:0010880; GO:0016020; GO:0016324; GO:0019899; GO:0019933; GO:0030552; GO:0031698; GO:0032729; GO:0032743; GO:0032754; GO:0033137; GO:0034704; GO:0043951; GO:0044325; GO:0045822; GO:0046872; GO:0048471; GO:0050852; GO:0051117; GO:0060314; GO:0061028; GO:0071320; GO:…	Q08499;Q07343	0.999997	S202	RRESFLYRSDSDYDLSPKSMSRNSSIASDIH	11.4753	11.5274	11.6067	12.6707	11.6794	12.6992	13.089	13.241	11.8367	12.5348
ATP2A2_P16615_S663	-1.86612	-0.198034	-0.181517	0.569195	-1.60914	0.539571	0.460109	0.384374	1.14254	0.759026	ATP2A2	Sarcoplasmic/endoplasmic reticulum calcium ATPase 2	P16615	0.0872592	-0.753031	sp|P16615|AT2A2_HUMAN Sarcoplasmic/endoplasmic reticulum calcium ATPase 2 OS=Homo sapiens OX=9606 GN=ATP2A2 PE=1 SV=1	FUNCTION: This magnesium-dependent enzyme catalyzes the hydrolysis of ATP coupled with the translocation of calcium from the cytosol to the sarcoplasmic reticulum lumen (PubMed:16402920, PubMed:12542527). Involved in autophagy in response to starvation. Upon interaction with VMP1 and activation, controls ER-isolation membrane contacts for autophagosome formation (PubMed:28890335). Also modulates …	SUBCELLULAR LOCATION: Endoplasmic reticulum membrane {ECO:0000250|UniProtKB:O55143}; Multi-pass membrane protein {ECO:0000255}. Sarcoplasmic reticulum membrane {ECO:0000269|PubMed:12804600}; Multi-pass membrane protein {ECO:0000255}.	DISEASE: Acrokeratosis verruciformis (AKV) [MIM:101900]: A localized disorder of keratinization, which is inherited as an autosomal dominant trait. Its onset is early in life with multiple flat-topped, flesh-colored papules on the hands and feet, punctate keratoses on the palms and soles, with varying degrees of nail involvement. The histopathology shows a distinctive pattern of epidermal feature…	autophagosome assembly [GO:0000045]; autophagosome membrane docking [GO:0016240]; calcium ion import into sarcoplasmic reticulum [GO:1990036]; calcium ion transmembrane transport [GO:0070588]; calcium ion transport from cytosol to endoplasmic reticulum [GO:1903515]; cardiac muscle hypertrophy in response to stress [GO:0014898]; cell adhesion [GO:0007155]; cellular calcium ion homeostasis [GO:0006…	ATP binding [GO:0005524]; ATP hydrolysis activity [GO:0016887]; calcium ion binding [GO:0005509]; enzyme binding [GO:0019899]; P-type calcium transporter activity [GO:0005388]; P-type calcium transporter activity involved in regulation of cardiac muscle cell membrane potential [GO:0086039]; P-type ion transporter activity [GO:0015662]; protein C-terminus binding [GO:0008022]; S100 protein binding…	calcium ion-transporting ATPase complex [GO:0090534]; endoplasmic reticulum [GO:0005783]; endoplasmic reticulum membrane [GO:0005789]; integral component of membrane [GO:0016021]; integral component of plasma membrane [GO:0005887]; longitudinal sarcoplasmic reticulum [GO:0014801]; membrane [GO:0016020]; platelet dense tubular network membrane [GO:0031095]; ribbon synapse [GO:0097470]; sarcoplasmi…	GO:0000045; GO:0002026; GO:0005388; GO:0005509; GO:0005524; GO:0005783; GO:0005789; GO:0005887; GO:0006874; GO:0006984; GO:0007155; GO:0008022; GO:0008544; GO:0010460; GO:0010882; GO:0014801; GO:0014883; GO:0014898; GO:0015662; GO:0016020; GO:0016021; GO:0016240; GO:0016529; GO:0016887; GO:0019899; GO:0031095; GO:0032469; GO:0032470; GO:0033017; GO:0033292; GO:0034220; GO:0034599; GO:0034976; GO:…	P16615	1	S663	TSKAFTGREFDELNPSAQRDACLNARCFARV	14.5536	15.5094	15.5189	15.949	14.7009	15.932	15.8865	15.8431	16.2775	16.0578
PPP1R7_Q15435_S27	-0.435276	-0.424152	-2	0.317098	-0.773743	-0.116382	0.821504	0.899806	1.41241	0.372337	PPP1R7	Protein phosphatase 1 regulatory subunit 7	Q15435	0.0915693	-0.576564	sp|Q15435|PP1R7_HUMAN Protein phosphatase 1 regulatory subunit 7 OS=Homo sapiens OX=9606 GN=PPP1R7 PE=1 SV=1	FUNCTION: Regulatory subunit of protein phosphatase 1. {ECO:0000250}.	SUBCELLULAR LOCATION: Nucleus {ECO:0000250}.		positive regulation of protein dephosphorylation [GO:0035307]	enzyme regulator activity [GO:0030234]; protein phosphatase regulator activity [GO:0019888]; protein serine/threonine phosphatase inhibitor activity [GO:0004865]	chromosome [GO:0005694]; cytoplasm [GO:0005737]; extracellular exosome [GO:0070062]; nucleus [GO:0005634]; protein phosphatase type 1 complex [GO:0000164]	GO:0000164; GO:0004865; GO:0005634; GO:0005694; GO:0005737; GO:0019888; GO:0030234; GO:0035307; GO:0070062	Q15435	1	S27	SQEMMEVDRRVESEESGDEEGKKHSSGIVAD	17.4818	17.4865	16.7851	17.8017	17.3379	17.6174	18.0162	18.0495	18.2675	17.8252
PPP1R7_Q15435_S12	0.160165	2	0.445027	0.105771	0.0653595	-0.796347	-0.737335	-0.125406	-0.744694	-0.872746	PPP1R7	Protein phosphatase 1 regulatory subunit 7	Q15435	0.0927509	0.695264	sp|Q15435|PP1R7_HUMAN Protein phosphatase 1 regulatory subunit 7 OS=Homo sapiens OX=9606 GN=PPP1R7 PE=1 SV=1	FUNCTION: Regulatory subunit of protein phosphatase 1. {ECO:0000250}.	SUBCELLULAR LOCATION: Nucleus {ECO:0000250}.		positive regulation of protein dephosphorylation [GO:0035307]	enzyme regulator activity [GO:0030234]; protein phosphatase regulator activity [GO:0019888]; protein serine/threonine phosphatase inhibitor activity [GO:0004865]	chromosome [GO:0005694]; cytoplasm [GO:0005737]; extracellular exosome [GO:0070062]; nucleus [GO:0005634]; protein phosphatase type 1 complex [GO:0000164]	GO:0000164; GO:0004865; GO:0005634; GO:0005694; GO:0005737; GO:0019888; GO:0030234; GO:0035307; GO:0070062	Q15435	1	S12	____MAAERGAGQQQSQEMMEVDRRVESEES	13.7702	15.0116	13.9213	13.7414	13.7199	13.2628	13.2941	13.6187	13.2902	13.2223
PDE3A_Q14432_T311	-1.18521	-0.792705	-0.637753	0.796318	-1.50647	0.394147	1.252	0.520068	-0.124077	1.28369	PDE3A	cGMP-inhibited 3',5'-cyclic phosphodiesterase A	Q14432	0.0937744	-0.613616	sp|Q14432|PDE3A_HUMAN cGMP-inhibited 3',5'-cyclic phosphodiesterase A OS=Homo sapiens OX=9606 GN=PDE3A PE=1 SV=3	FUNCTION: Cyclic nucleotide phosphodiesterase with specificity for the second messengers cAMP and cGMP, which are key regulators of many important physiological processes (PubMed:1315035, PubMed:8695850, PubMed:8155697, PubMed:25961942). Has also activity toward cUMP (PubMed:27975297). Independently of its catalytic activity it is part of an E2/17beta-estradiol-induced pro-apoptotic signaling pat…	SUBCELLULAR LOCATION: Membrane {ECO:0000250|UniProtKB:Q9Z0X4}; Multi-pass membrane protein {ECO:0000255}. Cytoplasm, cytosol {ECO:0000269|PubMed:35104454}.	DISEASE: Hypertension and brachydactyly syndrome (HTNB) [MIM:112410]: A syndrome characterized by brachydactyly type E, severe salt-independent but age-dependent hypertension, an increased fibroblast growth rate, neurovascular contact at the rostral-ventrolateral medulla, and altered baroreflex blood pressure regulation. It results in death from stroke before age 50 years when untreated. Brachyda…	apoptotic signaling pathway [GO:0097190]; cAMP-mediated signaling [GO:0019933]; cellular response to cGMP [GO:0071321]; cellular response to transforming growth factor beta stimulus [GO:0071560]; cGMP-mediated signaling [GO:0019934]; G protein-coupled receptor signaling pathway [GO:0007186]; lipid metabolic process [GO:0006629]; negative regulation of apoptotic process [GO:0043066]; negative regu…	3',5'-cyclic-AMP phosphodiesterase activity [GO:0004115]; 3',5'-cyclic-GMP phosphodiesterase activity [GO:0047555]; 3',5'-cyclic-nucleotide phosphodiesterase activity [GO:0004114]; cGMP-inhibited cyclic-nucleotide phosphodiesterase activity [GO:0004119]; estrogen binding [GO:0099130]; metal ion binding [GO:0046872]	cytosol [GO:0005829]; integral component of membrane [GO:0016021]	GO:0001556; GO:0004114; GO:0004115; GO:0004119; GO:0005829; GO:0006629; GO:0007165; GO:0007186; GO:0009410; GO:0016021; GO:0019933; GO:0019934; GO:0040020; GO:0043066; GO:0043116; GO:0043117; GO:0043951; GO:0046872; GO:0047555; GO:0060282; GO:0060700; GO:0071321; GO:0071560; GO:0097190; GO:0099130	Q14432	0.925157	T311	VSAEMSGCSSKSHRRTSLPCIPREQLMGHSE	13.8985	14.0795	14.151	14.8125	13.7503	14.627	15.0227	14.685	14.3879	15.0373
RYR2_Q92736_S2814.2	-1.29966	-0.734484	-0.308531	-0.4187	-1.15165	1.09479	0.354399	1.89029	0.0493022	0.524247	RYR2	Ryanodine receptor 2	Q92736	0.0947615	-0.380069	sp|Q92736|RYR2_HUMAN Ryanodine receptor 2 OS=Homo sapiens OX=9606 GN=RYR2 PE=1 SV=3	FUNCTION: Calcium channel that mediates the release of Ca(2+) from the sarcoplasmic reticulum into the cytoplasm and thereby plays a key role in triggering cardiac muscle contraction. Aberrant channel activation can lead to cardiac arrhythmia. In cardiac myocytes, calcium release is triggered by increased Ca(2+) levels due to activation of the L-type calcium channel CACNA1C. The calcium channel a…	SUBCELLULAR LOCATION: Sarcoplasmic reticulum membrane {ECO:0000269|PubMed:10830164}; Multi-pass membrane protein {ECO:0000269|PubMed:10830164}. Membrane {ECO:0000305|PubMed:10830164}; Multi-pass membrane protein {ECO:0000305|PubMed:10830164}. Sarcoplasmic reticulum {ECO:0000250|UniProtKB:P30957}. Note=The number of predicted transmembrane domains varies between orthologs, but both N-terminus and …	DISEASE: Arrhythmogenic right ventricular dysplasia, familial, 2 (ARVD2) [MIM:600996]: A congenital heart disease characterized by infiltration of adipose and fibrous tissue into the right ventricle and loss of myocardial cells, resulting in ventricular and supraventricular arrhythmias. {ECO:0000269|PubMed:11159936}. Note=The disease is caused by variants affecting the gene represented in this en…	calcium ion transport [GO:0006816]; calcium ion transport into cytosol [GO:0060402]; calcium-mediated signaling [GO:0019722]; calcium-mediated signaling using intracellular calcium source [GO:0035584]; cardiac muscle contraction [GO:0060048]; cardiac muscle hypertrophy [GO:0003300]; cell communication by electrical coupling involved in cardiac conduction [GO:0086064]; cellular calcium ion homeost…	calcium channel activity [GO:0005262]; calcium ion binding [GO:0005509]; calcium-induced calcium release activity [GO:0048763]; calcium-release channel activity [GO:0015278]; calmodulin binding [GO:0005516]; enzyme binding [GO:0019899]; identical protein binding [GO:0042802]; protein kinase A catalytic subunit binding [GO:0034236]; protein kinase A regulatory subunit binding [GO:0034237]; protein…	calcium channel complex [GO:0034704]; cytoplasmic vesicle membrane [GO:0030659]; junctional sarcoplasmic reticulum membrane [GO:0014701]; membrane [GO:0016020]; plasma membrane [GO:0005886]; protein-containing complex [GO:0032991]; sarcolemma [GO:0042383]; sarcoplasmic reticulum [GO:0016529]; sarcoplasmic reticulum membrane [GO:0033017]; smooth endoplasmic reticulum [GO:0005790]; Z disc [GO:00300…	GO:0001666; GO:0002027; GO:0003143; GO:0003220; GO:0003300; GO:0005219; GO:0005262; GO:0005509; GO:0005513; GO:0005516; GO:0005790; GO:0005886; GO:0006816; GO:0006874; GO:0010460; GO:0010881; GO:0010882; GO:0014701; GO:0014808; GO:0014850; GO:0015278; GO:0016020; GO:0016529; GO:0019722; GO:0019899; GO:0030018; GO:0030659; GO:0031000; GO:0032991; GO:0033017; GO:0034236; GO:0034237; GO:0034704; GO:…	Q92736	0.999902	S2814	ALYNRTRRISQTSQVSVDAAHGYSPRAIDMS	14.9627	15.0999	15.2033	15.1766	14.9986	15.5441	15.3643	15.7373	15.2902	15.4056
TTN_Q8WZ42_S892	-1.39325	-0.868555	0.219083	-1.33962	0.130442	0.721339	1.49272	1.28179	-0.230589	-0.0133649	TTN	Titin	Q8WZ42	0.0985121	-0.656473	sp|Q8WZ42|TITIN_HUMAN Titin OS=Homo sapiens OX=9606 GN=TTN PE=1 SV=4	FUNCTION: Key component in the assembly and functioning of vertebrate striated muscles. By providing connections at the level of individual microfilaments, it contributes to the fine balance of forces between the two halves of the sarcomere. The size and extensibility of the cross-links are the main determinants of sarcomere extensibility properties of muscle. In non-muscle cells, seems to play a…	SUBCELLULAR LOCATION: Cytoplasm {ECO:0000305|PubMed:16410549}. Nucleus {ECO:0000269|PubMed:16410549}.	DISEASE: Myopathy, myofibrillar, 9, with early respiratory failure (MFM9) [MIM:603689]: An autosomal dominant myopathy characterized by adulthood onset of weakness in proximal, distal, axial and respiratory muscles. Pelvic girdle weakness, foot drop and neck weakness are the main symptoms at onset, but ultimately the weakness usually involves the proximal compartment of both upper and lower limbs…	cardiac muscle cell development [GO:0055013]; cardiac muscle contraction [GO:0060048]; cardiac muscle hypertrophy [GO:0003300]; cardiac muscle tissue morphogenesis [GO:0055008]; cardiac myofibril assembly [GO:0055003]; detection of muscle stretch [GO:0035995]; mitotic chromosome condensation [GO:0007076]; muscle contraction [GO:0006936]; positive regulation of gene expression [GO:0010628]; positi…	actin filament binding [GO:0051015]; actinin binding [GO:0042805]; ATP binding [GO:0005524]; calcium ion binding [GO:0005509]; calmodulin binding [GO:0005516]; enzyme binding [GO:0019899]; identical protein binding [GO:0042802]; muscle alpha-actinin binding [GO:0051371]; protease binding [GO:0002020]; protein kinase binding [GO:0019901]; protein self-association [GO:0043621]; protein serine kinas…	condensed nuclear chromosome [GO:0000794]; cytosol [GO:0005829]; extracellular exosome [GO:0070062]; extracellular region [GO:0005576]; I band [GO:0031674]; M band [GO:0031430]; striated muscle thin filament [GO:0005865]; titin-telethonin complex [GO:1990733]; Z disc [GO:0030018]	GO:0000794; GO:0002020; GO:0003300; GO:0004674; GO:0004713; GO:0005509; GO:0005516; GO:0005524; GO:0005576; GO:0005829; GO:0005865; GO:0006936; GO:0006941; GO:0007076; GO:0008307; GO:0010628; GO:0010737; GO:0019899; GO:0019901; GO:0030018; GO:0030240; GO:0030241; GO:0031430; GO:0031433; GO:0031674; GO:0035995; GO:0042802; GO:0042805; GO:0043621; GO:0045214; GO:0045859; GO:0048769; GO:0050714; GO:…	Q8WZ42	0.959553	S892	PLPQFPFADTPDTYKSEAGVEVKKEVGVSIT	10.8568	11.1216	11.6705	10.8838	11.6257	11.924	12.3133	12.2068	11.4435	11.5532
PPP1R11_O60927_T102	0.220913	-1.36167	-1.36202	-0.363844	-0.549081	0.0839568	1.32786	1.62748	0.587141	-0.210728	PPP1R11	Protein phosphatase 1 regulatory subunit 11	O60927	0.100522	-0.503252	sp|O60927|PP1RB_HUMAN E3 ubiquitin-protein ligase PPP1R11 OS=Homo sapiens OX=9606 GN=PPP1R11 PE=1 SV=1	FUNCTION: Atypical E3 ubiquitin-protein ligase which ubiquitinates TLR2 at 'Lys-754' leading to its degradation by the proteasome. Plays a role in regulating inflammatory cytokine release and gram-positive bacterial clearance by functioning, in part, through the ubiquitination and degradation of TLR2 (PubMed:27805901). Inhibitor of protein phosphatase 1 (PubMed:9843442). {ECO:0000269|PubMed:27805…			defense response to Gram-positive bacterium [GO:0050830]; negative regulation of cytokine production [GO:0001818]; negative regulation of phosphoprotein phosphatase activity [GO:0032515]; ubiquitin-dependent protein catabolic process [GO:0006511]	protein phosphatase 1 binding [GO:0008157]; protein serine/threonine phosphatase inhibitor activity [GO:0004865]; ubiquitin protein ligase activity [GO:0061630]	cytoplasm [GO:0005737]; nucleus [GO:0005634]	GO:0001818; GO:0004865; GO:0005634; GO:0005737; GO:0006511; GO:0008157; GO:0032515; GO:0050830; GO:0061630	O60927	0.889024	T102	HTHCVRGHRKGRRRATLGPTPTTPPQPPDPS	12.4262	11.8433	11.8432	12.2108	12.1426	12.3758	12.834	12.9443	12.5611	12.2672
MYBPC3_Q14896_T290.1	0.536427	0.605693	0.581971	0.715762	0.584588	-0.262632	-2	-0.129102	0.246283	-0.243242	MYBPC3	Myosin-binding protein C, cardiac-type	Q14896	0.100854	4.55873	sp|Q14896|MYPC3_HUMAN Myosin-binding protein C, cardiac-type OS=Homo sapiens OX=9606 GN=MYBPC3 PE=1 SV=4	FUNCTION: Thick filament-associated protein located in the crossbridge region of vertebrate striated muscle a bands. In vitro it binds MHC, F-actin and native thin filaments, and modifies the activity of actin-activated myosin ATPase. It may modulate muscle contraction or may play a more structural role.		DISEASE: Cardiomyopathy, familial hypertrophic 4 (CMH4) [MIM:115197]: A hereditary heart disorder characterized by ventricular hypertrophy, which is usually asymmetric and often involves the interventricular septum. The symptoms include dyspnea, syncope, collapse, palpitations, and chest pain. They can be readily provoked by exercise. The disorder has inter- and intrafamilial variability ranging …	cardiac muscle contraction [GO:0060048]; cell adhesion [GO:0007155]; heart morphogenesis [GO:0003007]; positive regulation of ATP-dependent activity [GO:0032781]; regulation of muscle filament sliding [GO:0032971]; regulation of striated muscle contraction [GO:0006942]; ventricular cardiac muscle tissue morphogenesis [GO:0055010]	actin binding [GO:0003779]; ATPase activator activity [GO:0001671]; identical protein binding [GO:0042802]; metal ion binding [GO:0046872]; myosin binding [GO:0017022]; myosin heavy chain binding [GO:0032036]; structural constituent of muscle [GO:0008307]; titin binding [GO:0031432]	A band [GO:0031672]; C zone [GO:0014705]; cardiac myofibril [GO:0097512]; cytosol [GO:0005829]; sarcomere [GO:0030017]; striated muscle myosin thick filament [GO:0005863]	GO:0001671; GO:0003007; GO:0003779; GO:0005829; GO:0005863; GO:0006942; GO:0007155; GO:0008307; GO:0014705; GO:0017022; GO:0030017; GO:0031432; GO:0031672; GO:0032036; GO:0032781; GO:0032971; GO:0042802; GO:0046872; GO:0055010; GO:0060048; GO:0097512	Q14896	0.981101	T290	SLAGGGRRISDSHEDTGILDFSSLLKKRDSF	11.3217	11.5828	11.4934	11.9975	11.5032	8.3107	-0.63177	8.81387	10.2284	8.38376
TTN_Q8WZ42_S4519	1.47851	0.989805	0.256187	-0.757957	1.23996	-0.625094	0.0905253	-1.53379	-0.21026	-0.927898	TTN	Titin	Q8WZ42	0.101526	0.688946	sp|Q8WZ42|TITIN_HUMAN Titin OS=Homo sapiens OX=9606 GN=TTN PE=1 SV=4	FUNCTION: Key component in the assembly and functioning of vertebrate striated muscles. By providing connections at the level of individual microfilaments, it contributes to the fine balance of forces between the two halves of the sarcomere. The size and extensibility of the cross-links are the main determinants of sarcomere extensibility properties of muscle. In non-muscle cells, seems to play a…	SUBCELLULAR LOCATION: Cytoplasm {ECO:0000305|PubMed:16410549}. Nucleus {ECO:0000269|PubMed:16410549}.	DISEASE: Myopathy, myofibrillar, 9, with early respiratory failure (MFM9) [MIM:603689]: An autosomal dominant myopathy characterized by adulthood onset of weakness in proximal, distal, axial and respiratory muscles. Pelvic girdle weakness, foot drop and neck weakness are the main symptoms at onset, but ultimately the weakness usually involves the proximal compartment of both upper and lower limbs…	cardiac muscle cell development [GO:0055013]; cardiac muscle contraction [GO:0060048]; cardiac muscle hypertrophy [GO:0003300]; cardiac muscle tissue morphogenesis [GO:0055008]; cardiac myofibril assembly [GO:0055003]; detection of muscle stretch [GO:0035995]; mitotic chromosome condensation [GO:0007076]; muscle contraction [GO:0006936]; positive regulation of gene expression [GO:0010628]; positi…	actin filament binding [GO:0051015]; actinin binding [GO:0042805]; ATP binding [GO:0005524]; calcium ion binding [GO:0005509]; calmodulin binding [GO:0005516]; enzyme binding [GO:0019899]; identical protein binding [GO:0042802]; muscle alpha-actinin binding [GO:0051371]; protease binding [GO:0002020]; protein kinase binding [GO:0019901]; protein self-association [GO:0043621]; protein serine kinas…	condensed nuclear chromosome [GO:0000794]; cytosol [GO:0005829]; extracellular exosome [GO:0070062]; extracellular region [GO:0005576]; I band [GO:0031674]; M band [GO:0031430]; striated muscle thin filament [GO:0005865]; titin-telethonin complex [GO:1990733]; Z disc [GO:0030018]	GO:0000794; GO:0002020; GO:0003300; GO:0004674; GO:0004713; GO:0005509; GO:0005516; GO:0005524; GO:0005576; GO:0005829; GO:0005865; GO:0006936; GO:0006941; GO:0007076; GO:0008307; GO:0010628; GO:0010737; GO:0019899; GO:0019901; GO:0030018; GO:0030240; GO:0030241; GO:0031430; GO:0031433; GO:0031674; GO:0035995; GO:0042802; GO:0042805; GO:0043621; GO:0045214; GO:0045859; GO:0048769; GO:0050714; GO:…	Q8WZ42	0.999453	S4519	TPVIETIWQKDGAALSPSPNWRISDAENKHI	12.908	12.6455	12.2514	11.7067	12.7799	11.7781	12.1625	11.29	12.0009	11.6154
PPP1R1C_Q8WVI7_S5	1.01154	0.793147	0.534391	0.975391	0.686927	-0.517705	-1.65206	-1.32263	0.363018	-0.872019	PPP1R1C	Protein phosphatase 1 regulatory subunit 1C	Q8WVI7	0.102112	0.354564	sp|Q8WVI7|PPR1C_HUMAN Protein phosphatase 1 regulatory subunit 1C OS=Homo sapiens OX=9606 GN=PPP1R1C PE=1 SV=1	FUNCTION: May increase cell susceptibility to TNF-induced apoptosis. {ECO:0000269|PubMed:19874272}.	SUBCELLULAR LOCATION: Cytoplasm {ECO:0000250}.		cell cycle [GO:0007049]; cell division [GO:0051301]; intracellular signal transduction [GO:0035556]	protein phosphatase inhibitor activity [GO:0004864]	cytoplasm [GO:0005737]	GO:0004864; GO:0005737; GO:0007049; GO:0035556; GO:0051301	Q8WVI7	1	S5	___________MEPNSPKKIQFAVPVFQSQI	16.0101	15.9617	15.9044	16.0021	15.9382	15.6713	15.42	15.493	15.8664	15.5928
MYBPC3_Q14896_S304	-1.03172	-1.23663	-0.445189	0.304395	-0.630989	0.937604	1.45196	0.992568	-1.08924	0.747242	MYBPC3	Myosin-binding protein C, cardiac-type	Q14896	0.112104	-0.960558	sp|Q14896|MYPC3_HUMAN Myosin-binding protein C, cardiac-type OS=Homo sapiens OX=9606 GN=MYBPC3 PE=1 SV=4	FUNCTION: Thick filament-associated protein located in the crossbridge region of vertebrate striated muscle a bands. In vitro it binds MHC, F-actin and native thin filaments, and modifies the activity of actin-activated myosin ATPase. It may modulate muscle contraction or may play a more structural role.		DISEASE: Cardiomyopathy, familial hypertrophic 4 (CMH4) [MIM:115197]: A hereditary heart disorder characterized by ventricular hypertrophy, which is usually asymmetric and often involves the interventricular septum. The symptoms include dyspnea, syncope, collapse, palpitations, and chest pain. They can be readily provoked by exercise. The disorder has inter- and intrafamilial variability ranging …	cardiac muscle contraction [GO:0060048]; cell adhesion [GO:0007155]; heart morphogenesis [GO:0003007]; positive regulation of ATP-dependent activity [GO:0032781]; regulation of muscle filament sliding [GO:0032971]; regulation of striated muscle contraction [GO:0006942]; ventricular cardiac muscle tissue morphogenesis [GO:0055010]	actin binding [GO:0003779]; ATPase activator activity [GO:0001671]; identical protein binding [GO:0042802]; metal ion binding [GO:0046872]; myosin binding [GO:0017022]; myosin heavy chain binding [GO:0032036]; structural constituent of muscle [GO:0008307]; titin binding [GO:0031432]	A band [GO:0031672]; C zone [GO:0014705]; cardiac myofibril [GO:0097512]; cytosol [GO:0005829]; sarcomere [GO:0030017]; striated muscle myosin thick filament [GO:0005863]	GO:0001671; GO:0003007; GO:0003779; GO:0005829; GO:0005863; GO:0006942; GO:0007155; GO:0008307; GO:0014705; GO:0017022; GO:0030017; GO:0031432; GO:0031672; GO:0032036; GO:0032781; GO:0032971; GO:0042802; GO:0046872; GO:0055010; GO:0060048; GO:0097512	Q14896	0.961074	S304	DTGILDFSSLLKKRDSFRTPRDSKLEAPAEE	13.0199	12.858	13.4832	14.0753	13.3364	14.5754	14.9817	14.6189	12.9744	14.4251
PPP1R1A_Q13522_S67	-0.913211	-1.1461	-0.830768	1.08677	-1.32346	0.497813	0.0478995	0.525242	0.48452	1.57129	PPP1R1A	Protein phosphatase 1 regulatory subunit 1A	Q13522	0.112104	-0.694204	sp|Q13522|PPR1A_HUMAN Protein phosphatase 1 regulatory subunit 1A OS=Homo sapiens OX=9606 GN=PPP1R1A PE=1 SV=2	FUNCTION: Inhibitor of protein-phosphatase 1. This protein may be important in hormonal control of glycogen metabolism. Hormones that elevate intracellular cAMP increase I-1 activity in many tissues. I-1 activation may impose cAMP control over proteins that are not directly phosphorylated by PKA. Following a rise in intracellular calcium, I-1 is inactivated by calcineurin (or PP2B). Does not inhi…			glycogen metabolic process [GO:0005977]; intracellular signal transduction [GO:0035556]	protein serine/threonine phosphatase inhibitor activity [GO:0004865]	cytoplasm [GO:0005737]	GO:0004865; GO:0005737; GO:0005977; GO:0035556	Q13522	1	S67	EDRIPNPHLKSTLAMSPRQRKKMTRITPTMK	14.4437	14.3144	14.4894	15.5538	14.216	15.2269	14.9772	15.2421	15.2195	15.8227
PRKAA1_Q13131_S508	-0.955579	-0.222712	-1.39936	-0.355606	-0.629509	0.436317	1.05494	1.79931	-0.563357	0.835553	PRKAA1	5'-AMP-activated protein kinase catalytic subunit alpha-1	Q13131	0.11456	-0.400276	sp|Q13131|AAPK1_HUMAN 5'-AMP-activated protein kinase catalytic subunit alpha-1 OS=Homo sapiens OX=9606 GN=PRKAA1 PE=1 SV=4	FUNCTION: Catalytic subunit of AMP-activated protein kinase (AMPK), an energy sensor protein kinase that plays a key role in regulating cellular energy metabolism (PubMed:17307971, PubMed:17712357). In response to reduction of intracellular ATP levels, AMPK activates energy-producing pathways and inhibits energy-consuming processes: inhibits protein, carbohydrate and lipid biosynthesis, as well a…	SUBCELLULAR LOCATION: Cytoplasm {ECO:0000269|PubMed:15866171}. Nucleus {ECO:0000269|PubMed:15866171}. Note=In response to stress, recruited by p53/TP53 to specific promoters. {ECO:0000269|PubMed:15866171}.		autophagy [GO:0006914]; bile acid and bile salt transport [GO:0015721]; bile acid signaling pathway [GO:0038183]; CAMKK-AMPK signaling cascade [GO:0061762]; cellular response to calcium ion [GO:0071277]; cellular response to ethanol [GO:0071361]; cellular response to glucose starvation [GO:0042149]; cellular response to glucose stimulus [GO:0071333]; cellular response to hydrogen peroxide [GO:007…	[acetyl-CoA carboxylase] kinase activity [GO:0050405]; [hydroxymethylglutaryl-CoA reductase (NADPH)] kinase activity [GO:0047322]; AMP-activated protein kinase activity [GO:0004679]; ATP binding [GO:0005524]; cAMP-dependent protein kinase activity [GO:0004691]; chromatin binding [GO:0003682]; histone serine kinase activity [GO:0035174]; metal ion binding [GO:0046872]; protein C-terminus binding […	apical plasma membrane [GO:0016324]; axon [GO:0030424]; cytoplasm [GO:0005737]; cytosol [GO:0005829]; dendrite [GO:0030425]; neuronal cell body [GO:0043025]; nuclear speck [GO:0016607]; nucleoplasm [GO:0005654]; nucleotide-activated protein kinase complex [GO:0031588]; nucleus [GO:0005634]	GO:0001666; GO:0003682; GO:0004672; GO:0004674; GO:0004679; GO:0004691; GO:0005524; GO:0005634; GO:0005654; GO:0005737; GO:0005829; GO:0006006; GO:0006325; GO:0006468; GO:0006633; GO:0006695; GO:0006914; GO:0007165; GO:0008022; GO:0008284; GO:0008610; GO:0009411; GO:0009631; GO:0010332; GO:0010508; GO:0010628; GO:0010629; GO:0014823; GO:0015721; GO:0016055; GO:0016324; GO:0016607; GO:0019395; GO:…	Q13131	0.982564	S508	RSGSVSNYRSCQRSDSDAEAQGKSSEVSLTS	13.6148	13.8206	13.4901	13.7833	13.7064	14.0057	14.1795	14.3885	13.7249	14.1179
ATP1A2_P50993_S439	1.55088	0.759339	0.696728	-0.784361	0.801322	-0.0738968	-1.76586	-0.236499	0.0948254	-1.04248	ATP1A2	Sodium/potassium-transporting ATPase subunit alpha-2	P50993	0.115977	0.89595	sp|P50993|AT1A2_HUMAN Sodium/potassium-transporting ATPase subunit alpha-2 OS=Homo sapiens OX=9606 GN=ATP1A2 PE=1 SV=1	FUNCTION: This is the catalytic component of the active enzyme, which catalyzes the hydrolysis of ATP coupled with the exchange of sodium and potassium ions across the plasma membrane. This action creates the electrochemical gradient of sodium and potassium, providing the energy for active transport of various nutrients. {ECO:0000269|PubMed:33880529}.	SUBCELLULAR LOCATION: Membrane {ECO:0000269|PubMed:7711835}; Multi-pass membrane protein {ECO:0000269|PubMed:7711835}. Cell membrane {ECO:0000269|PubMed:7711835}; Multi-pass membrane protein {ECO:0000269|PubMed:7711835}.	DISEASE: Migraine, familial hemiplegic, 2 (FHM2) [MIM:602481]: A subtype of migraine with aura associated with hemiparesis in some families. Migraine is a disabling symptom complex of periodic headaches, usually temporal and unilateral. Headaches are often accompanied by irritability, nausea, vomiting and photophobia, preceded by constriction of the cranial arteries. Migraine with aura is charact…	adult locomotory behavior [GO:0008344]; amygdala development [GO:0021764]; ATP metabolic process [GO:0046034]; behavioral fear response [GO:0001662]; cardiac muscle contraction [GO:0060048]; cation transmembrane transport [GO:0098655]; cell communication by electrical coupling involved in cardiac conduction [GO:0086064]; cellular potassium ion homeostasis [GO:0030007]; cellular response to mechan…	ATP binding [GO:0005524]; ATP hydrolysis activity [GO:0016887]; ATPase-coupled cation transmembrane transporter activity [GO:0019829]; chaperone binding [GO:0051087]; P-type sodium:potassium-exchanging transporter activity [GO:0005391]; phosphatase activity [GO:0016791]; potassium ion binding [GO:0030955]; protein heterodimerization activity [GO:0046982]; sodium ion binding [GO:0031402]; steroid …	caveola [GO:0005901]; cell projection [GO:0042995]; cytoplasm [GO:0005737]; dendritic spine [GO:0043197]; endosome [GO:0005768]; extracellular vesicle [GO:1903561]; intercalated disc [GO:0014704]; membrane [GO:0016020]; neuronal cell body [GO:0043025]; organelle membrane [GO:0031090]; plasma membrane [GO:0005886]; sodium:potassium-exchanging ATPase complex [GO:0005890]; T-tubule [GO:0030315]	GO:0001504; GO:0001662; GO:0002026; GO:0002087; GO:0005391; GO:0005496; GO:0005524; GO:0005737; GO:0005768; GO:0005886; GO:0005890; GO:0005901; GO:0006813; GO:0006814; GO:0006883; GO:0006937; GO:0006940; GO:0006942; GO:0008217; GO:0008344; GO:0008542; GO:0010881; GO:0010996; GO:0014704; GO:0016020; GO:0016791; GO:0016887; GO:0019229; GO:0019829; GO:0021764; GO:0021989; GO:0030007; GO:0030315; GO:…	P50993	0.999908	S439	GLCNRAVFKAGQENISVSKRDTAGDASESAL	15.211	14.6246	14.5783	13.4812	14.6557	14.0074	12.7542	13.887	14.1324	13.29
MYBPC3_Q14896_S296.1	0.408186	0.476378	-0.686714	1.64176	1.1445	-0.875068	-1.26246	-1.25876	0.430413	-0.0182501	MYBPC3	Myosin-binding protein C, cardiac-type	Q14896	0.120585	0.963529	sp|Q14896|MYPC3_HUMAN Myosin-binding protein C, cardiac-type OS=Homo sapiens OX=9606 GN=MYBPC3 PE=1 SV=4	FUNCTION: Thick filament-associated protein located in the crossbridge region of vertebrate striated muscle a bands. In vitro it binds MHC, F-actin and native thin filaments, and modifies the activity of actin-activated myosin ATPase. It may modulate muscle contraction or may play a more structural role.		DISEASE: Cardiomyopathy, familial hypertrophic 4 (CMH4) [MIM:115197]: A hereditary heart disorder characterized by ventricular hypertrophy, which is usually asymmetric and often involves the interventricular septum. The symptoms include dyspnea, syncope, collapse, palpitations, and chest pain. They can be readily provoked by exercise. The disorder has inter- and intrafamilial variability ranging …	cardiac muscle contraction [GO:0060048]; cell adhesion [GO:0007155]; heart morphogenesis [GO:0003007]; positive regulation of ATP-dependent activity [GO:0032781]; regulation of muscle filament sliding [GO:0032971]; regulation of striated muscle contraction [GO:0006942]; ventricular cardiac muscle tissue morphogenesis [GO:0055010]	actin binding [GO:0003779]; ATPase activator activity [GO:0001671]; identical protein binding [GO:0042802]; metal ion binding [GO:0046872]; myosin binding [GO:0017022]; myosin heavy chain binding [GO:0032036]; structural constituent of muscle [GO:0008307]; titin binding [GO:0031432]	A band [GO:0031672]; C zone [GO:0014705]; cardiac myofibril [GO:0097512]; cytosol [GO:0005829]; sarcomere [GO:0030017]; striated muscle myosin thick filament [GO:0005863]	GO:0001671; GO:0003007; GO:0003779; GO:0005829; GO:0005863; GO:0006942; GO:0007155; GO:0008307; GO:0014705; GO:0017022; GO:0030017; GO:0031432; GO:0031672; GO:0032036; GO:0032781; GO:0032971; GO:0042802; GO:0046872; GO:0055010; GO:0060048; GO:0097512	Q14896	0.86694	S296	RRISDSHEDTGILDFSSLLKKRDSFRTPRDS	12.8341	12.8891	11.9502	13.8298	13.4284	11.7982	11.4855	11.4885	12.852	12.4898
PDE3A_Q14432_S520.1	0.0558676	0.274355	0.797646	1.20063	0.516701	-1.16119	1.13785	-1.83544	-0.295115	-0.691301	PDE3A	cGMP-inhibited 3',5'-cyclic phosphodiesterase A	Q14432	0.14664	0.878703	sp|Q14432|PDE3A_HUMAN cGMP-inhibited 3',5'-cyclic phosphodiesterase A OS=Homo sapiens OX=9606 GN=PDE3A PE=1 SV=3	FUNCTION: Cyclic nucleotide phosphodiesterase with specificity for the second messengers cAMP and cGMP, which are key regulators of many important physiological processes (PubMed:1315035, PubMed:8695850, PubMed:8155697, PubMed:25961942). Has also activity toward cUMP (PubMed:27975297). Independently of its catalytic activity it is part of an E2/17beta-estradiol-induced pro-apoptotic signaling pat…	SUBCELLULAR LOCATION: Membrane {ECO:0000250|UniProtKB:Q9Z0X4}; Multi-pass membrane protein {ECO:0000255}. Cytoplasm, cytosol {ECO:0000269|PubMed:35104454}.	DISEASE: Hypertension and brachydactyly syndrome (HTNB) [MIM:112410]: A syndrome characterized by brachydactyly type E, severe salt-independent but age-dependent hypertension, an increased fibroblast growth rate, neurovascular contact at the rostral-ventrolateral medulla, and altered baroreflex blood pressure regulation. It results in death from stroke before age 50 years when untreated. Brachyda…	apoptotic signaling pathway [GO:0097190]; cAMP-mediated signaling [GO:0019933]; cellular response to cGMP [GO:0071321]; cellular response to transforming growth factor beta stimulus [GO:0071560]; cGMP-mediated signaling [GO:0019934]; G protein-coupled receptor signaling pathway [GO:0007186]; lipid metabolic process [GO:0006629]; negative regulation of apoptotic process [GO:0043066]; negative regu…	3',5'-cyclic-AMP phosphodiesterase activity [GO:0004115]; 3',5'-cyclic-GMP phosphodiesterase activity [GO:0047555]; 3',5'-cyclic-nucleotide phosphodiesterase activity [GO:0004114]; cGMP-inhibited cyclic-nucleotide phosphodiesterase activity [GO:0004119]; estrogen binding [GO:0099130]; metal ion binding [GO:0046872]	cytosol [GO:0005829]; integral component of membrane [GO:0016021]	GO:0001556; GO:0004114; GO:0004115; GO:0004119; GO:0005829; GO:0006629; GO:0007165; GO:0007186; GO:0009410; GO:0016021; GO:0019933; GO:0019934; GO:0040020; GO:0043066; GO:0043116; GO:0043117; GO:0043951; GO:0046872; GO:0047555; GO:0060282; GO:0060700; GO:0071321; GO:0071560; GO:0097190; GO:0099130	Q14432	0.958673	S520	VKAKKQSRPGALAKISPLSSPCSSPLQGTPA	10.1884	10.3571	10.7611	11.0723	10.5442	9.24871	11.0238	8.72813	9.9174	9.61151
PLN_P26678_S16.1	-1.01739	-1.19522	0.117068	0.199968	-0.818899	1.3095	1.21988	0.0539943	-1.07412	1.20522	PLN	Cardiac phospholamban	P26678	0.16151	-1.32548	sp|P26678|PPLA_HUMAN Cardiac phospholamban OS=Homo sapiens OX=9606 GN=PLN PE=1 SV=1	FUNCTION: Reversibly inhibits the activity of ATP2A2 in cardiac sarcoplasmic reticulum by decreasing the apparent affinity of the ATPase for Ca(2+) (PubMed:28890335). Modulates the contractility of the heart muscle in response to physiological stimuli via its effects on ATP2A2. Modulates calcium re-uptake during muscle relaxation and plays an important role in calcium homeostasis in the heart mus…	SUBCELLULAR LOCATION: Endoplasmic reticulum membrane {ECO:0000269|PubMed:17241641}; Single-pass membrane protein {ECO:0000255}. Sarcoplasmic reticulum membrane {ECO:0000269|PubMed:12804600, ECO:0000269|PubMed:15598648, ECO:0000269|PubMed:22427649}; Single-pass membrane protein {ECO:0000255}. Mitochondrion membrane {ECO:0000250|UniProtKB:A4IFH6}; Single-pass membrane protein {ECO:0000255}. Membran…	DISEASE: Cardiomyopathy, dilated 1P (CMD1P) [MIM:609909]: A disorder characterized by ventricular dilation and impaired systolic function, resulting in congestive heart failure and arrhythmia. Patients are at risk of premature death. {ECO:0000269|PubMed:12610310, ECO:0000269|PubMed:16432188, ECO:0000269|PubMed:22137083, ECO:0000269|PubMed:22427649, ECO:0000269|PubMed:22707725}. Note=The disease i…	adenylate cyclase-activating adrenergic receptor signaling pathway involved in heart process [GO:0086023]; blood circulation [GO:0008015]; cardiac muscle tissue development [GO:0048738]; muscle cell cellular homeostasis [GO:0046716]; negative regulation of ATP-dependent activity [GO:0032780]; negative regulation of ATPase-coupled calcium transmembrane transporter activity [GO:1901895]; negative r…	ATPase binding [GO:0051117]; ATPase inhibitor activity [GO:0042030]; enzyme inhibitor activity [GO:0004857]; identical protein binding [GO:0042802]; protein homodimerization activity [GO:0042803]	calcium ion-transporting ATPase complex [GO:0090534]; endoplasmic reticulum [GO:0005783]; membrane [GO:0016020]; mitochondrial membrane [GO:0031966]; mitochondrion [GO:0005739]; perinuclear region of cytoplasm [GO:0048471]; sarcoplasmic reticulum [GO:0016529]; sarcoplasmic reticulum membrane [GO:0033017]	GO:0002026; GO:0004857; GO:0005739; GO:0005783; GO:0007219; GO:0008015; GO:0008016; GO:0010459; GO:0010881; GO:0016020; GO:0016529; GO:0031966; GO:0032780; GO:0033017; GO:0042030; GO:0042802; GO:0042803; GO:0043086; GO:0046716; GO:0048471; GO:0048738; GO:0051117; GO:0051480; GO:0051924; GO:0051926; GO:0055119; GO:0060314; GO:0086004; GO:0086023; GO:0086036; GO:0086092; GO:0090281; GO:0090534; GO:…	P26678	1	S16	MEKVQYLTRSAIRRASTIEMPQQARQKLQNL	18.491	18.2739	19.8759	19.9771	18.7333	21.3315	21.2221	19.7989	18.4217	21.2042
PLN_P26678_T17.1	-1.01739	-1.19522	0.117068	0.199968	-0.818899	1.3095	1.21988	0.0539943	-1.07412	1.20522	PLN	Cardiac phospholamban	P26678	0.16151	-1.32548	sp|P26678|PPLA_HUMAN Cardiac phospholamban OS=Homo sapiens OX=9606 GN=PLN PE=1 SV=1	FUNCTION: Reversibly inhibits the activity of ATP2A2 in cardiac sarcoplasmic reticulum by decreasing the apparent affinity of the ATPase for Ca(2+) (PubMed:28890335). Modulates the contractility of the heart muscle in response to physiological stimuli via its effects on ATP2A2. Modulates calcium re-uptake during muscle relaxation and plays an important role in calcium homeostasis in the heart mus…	SUBCELLULAR LOCATION: Endoplasmic reticulum membrane {ECO:0000269|PubMed:17241641}; Single-pass membrane protein {ECO:0000255}. Sarcoplasmic reticulum membrane {ECO:0000269|PubMed:12804600, ECO:0000269|PubMed:15598648, ECO:0000269|PubMed:22427649}; Single-pass membrane protein {ECO:0000255}. Mitochondrion membrane {ECO:0000250|UniProtKB:A4IFH6}; Single-pass membrane protein {ECO:0000255}. Membran…	DISEASE: Cardiomyopathy, dilated 1P (CMD1P) [MIM:609909]: A disorder characterized by ventricular dilation and impaired systolic function, resulting in congestive heart failure and arrhythmia. Patients are at risk of premature death. {ECO:0000269|PubMed:12610310, ECO:0000269|PubMed:16432188, ECO:0000269|PubMed:22137083, ECO:0000269|PubMed:22427649, ECO:0000269|PubMed:22707725}. Note=The disease i…	adenylate cyclase-activating adrenergic receptor signaling pathway involved in heart process [GO:0086023]; blood circulation [GO:0008015]; cardiac muscle tissue development [GO:0048738]; muscle cell cellular homeostasis [GO:0046716]; negative regulation of ATP-dependent activity [GO:0032780]; negative regulation of ATPase-coupled calcium transmembrane transporter activity [GO:1901895]; negative r…	ATPase binding [GO:0051117]; ATPase inhibitor activity [GO:0042030]; enzyme inhibitor activity [GO:0004857]; identical protein binding [GO:0042802]; protein homodimerization activity [GO:0042803]	calcium ion-transporting ATPase complex [GO:0090534]; endoplasmic reticulum [GO:0005783]; membrane [GO:0016020]; mitochondrial membrane [GO:0031966]; mitochondrion [GO:0005739]; perinuclear region of cytoplasm [GO:0048471]; sarcoplasmic reticulum [GO:0016529]; sarcoplasmic reticulum membrane [GO:0033017]	GO:0002026; GO:0004857; GO:0005739; GO:0005783; GO:0007219; GO:0008015; GO:0008016; GO:0010459; GO:0010881; GO:0016020; GO:0016529; GO:0031966; GO:0032780; GO:0033017; GO:0042030; GO:0042802; GO:0042803; GO:0043086; GO:0046716; GO:0048471; GO:0048738; GO:0051117; GO:0051480; GO:0051924; GO:0051926; GO:0055119; GO:0060314; GO:0086004; GO:0086023; GO:0086036; GO:0086092; GO:0090281; GO:0090534; GO:…	P26678	1	T17	EKVQYLTRSAIRRASTIEMPQQARQKLQNLF	18.491	18.2739	19.8759	19.9771	18.7333	21.3315	21.2221	19.7989	18.4217	21.2042
